# Supplementary material
Source: PubMed Central journal article supplement (PMC3665646)
Supplement: NIHMS451164-supplement-01.pdf [file NIHMS451164-supplement-01.pdf]

## Experimental Procedures

### Cell Culture

Huh 7.5.1 hepatoma cells (a gift from F. Chisari), HEK-293T and HeLa MAGI cells were maintained at 37°C in humidified air containing 5% CO<sub>2</sub> in Dulbecco's modified Eagle's medium (DMEM; Cellgro) supplemented with 15% (vol/vol) fetal bovine serum (FBS; Gibco) and 2 mM L-glutamine (Gibco). Medium was prepared on a weekly basis to maintain maximum L-glutamine activity.

### Virus stock and viral infections

Infectious genotype 2a JFH1 strain HCV was obtained from T. Wakita. Large scale viral preparations were prepared through inoculation of Huh 7.5.1 cells with seed strain, followed by cultivation for 3-5 days, then collection and clarification (1500 rpm x 15 minutes) of supernatant. Viral aliquots were stored at -80°C until use.

New Guinea C strain of dengue was prepared in C6/36 cells. Influenza A/WSN/33 (H1N1) (a kind gift from Peter Palese, Microbiology Department, Mt. Sinai School of Medicine, NY, NY) was propagated and assessed as previously described (PMID:20064371). Rescue assays for dengue and influenza were performed in HeLa MAGI cells.

### siRNA screen

siRNAs for screen optimization and follow up (Dharmacon siGENOME) were obtained from Dharmacon with the exception of GFP, which was obtained from Sigma. Control siRNAs for HCV rescue from IFN included IFNAR smartpool (positive) and NT2 and NT3 non-targeting and GFP siRNAs (negative). Throughout the screen, on-plate Z factors were monitored for quality control, and an average value of 0.21 was maintained. The original screen was performed using siRNA pools, composed of 4 siRNA per gene (Dharmacon siGenome pooled siRNA library) as in prior publications (PMID: 19717417). The deconvolution screen was performed using Dharmacon Set of Four siGenome sets. Post screen studies were performed using Dharmacon SiGENOME Set-of-Four-Upgrade sets for individual genes, and

Dharmacon NT2, NT3 and Sigma GFP negative controls. Conditions were established for optimal cell count, transfection reagent concentration, IFN dose, and JFH1 titer to achieve maximal dynamic range between cells transfected with IFNAR siRNA versus non-targeting siRNA. Transfections were performed using Oligofectamine (Invitrogen) in reverse transfection format. For 384 well assays, liquid dispensing machines (Matrix WellMate) were employed to deliver all reagents. Transfections were performed in 384 well format in triplicate for the screen, then 384, 96, 24 or 6-well format for follow up assays, depending on assay. Oligofectamine was diluted 140 $\mu$ l/10,000 $\mu$ l (0.014) in reduced serum medium (Opti-mem®, Gibco) and dispensed to individual wells, followed by robotic addition of 1 $\mu$ m siRNA (Velocity11 Bravo), and then cells (1100 cells/ well) for a final siRNA concentration of 1.5  $\mu$ M and final lipid concentration of 0.4 percent of total volume. Throughout transfection experiments, cells were maintained in DMEM supplemented with 15% FBS. **Medium was prepared fresh weekly to minimize L-glutamine degradation.** **24 hours following transfection, 5 $\mu$ l of medium was added to wells on the plate periphery to decrease edge-effect.** 48 hours following transfection, medium was aspirated from all wells and replaced with fresh medium containing 100 IU/ml of IFN alpha (PBL). 24 hours following IFN treatment, medium was removed and replaced with medium containing JFH1 (MOI of 1). Cells were then incubated for 48 hours, followed by immunofluorescence. Deconvolution screening was performed in an identical manner except that for each gene 4 individual siRNAs were used, instead of a pool, and positive values were determined based on 2 fold rescue above the mean of on-plate negative controls.

### **Immunofluorescence**

HCV anti-core antibody was prepared through culture of hybridoma containing cells obtained from TJ Liang. For immunofluorescence experiments, cells were fixed in 4% PFA (Sigma), then permeabilized in 0.2% Triton, then overnight incubation with anti-core antibody at 4°C. Cells were then stained with goat anti mouse Alexa 488 secondary antibody (Invitrogen) for 1 hour, followed by incubation in Hoechst. Cells were imaged using FITC and DAPI and images captured using an IXM2 automated microscope at the Harvard Longwood ICCB, and analyzed using either a custom script (Tiao Xie, Harvard ICCB-L) during screen and for 384 well plate experiments or MetaXpress cell scoring software, for 96 well plate experiments where debris less significantly influenced results. For dengue virus and influenza virus

immunofluorescence, identical conditions were used except that anti-dengue envelope and anti-HA 29 primary antibodies were used for dengue and influenza, respectively.

### **Image Analysis / Scoring**

Images were scored for percent infected cells. Total number of cells was determined by number of nuclei labeled with Hoechst, and the number of infected cells was determined by number of green cells corresponding to individual nuclei. To increase accuracy of cell scoring, a custom script was designed using the following algorithm (**Fig. S2**). Algorithm: The algorithm first segments the DAPI channel to pick up all the individual nuclei. A rough thresholding is performed for the entire DAPI image. The nuclear segmentation then gets refined by adjusting the threshold on a per-object basis and dividing clustered nuclei. To score all the cells in the FITC channel, the FITC image is smoothed and the image background is calculated using the smoothed image. Thresholding is performed for the FITC image using scaled image background. To score positive cells, the algorithm matches nuclear segmentation with FITC segmentation to find FITC positive nuclei. In order to remove the large circular debris in the FITC channel, the size and shape of all the objects identified are measured, and the objects with area and roundness above a given threshold are removed.

Percent infection was then calculated for each well, and the median absolute deviation (MAD) was determined for each plate. Wells were considered positive if they 1) scored  $\geq 3 \times \text{MAD}$  (which is roughly equal to  $2 \times$  the corrected MAD) and 3) revealed an image consistent with score on visual inspection.

**Wells eliminated during visual inspection are summarized in Table S2.**

Data were analyzed using IPA (Ingenuity Systems).

### **Total RNA isolation and quantitative RT PCR (qRT-PCR)**

Intracellular total cellular and viral RNA was isolated using QIAshredder<sup>TM</sup> (Qiagen), followed by removal of genomic DNA and RNA isolation using RNEasy plus kits (Qiagen), all according to manufacturer's protocols. RNA was stored at  $-80^{\circ}\text{C}$ , then reverse transcribed by random priming using the High capacity cDNA reverse transcription kit (Applied Biosciences) and quantified by real-time PCR using the DyNAmo

HS SYBR green qPCR kit (Finnzyme;Espoo,Finland). qRT-PCR results were interpreted using delta / delta CT (PMID [11328886](#)), using GAPDH as an internal control.

Gene specific primers are provided in **Table S8**. Efficiency curves were performed on all primers to rule out concentration dependent amplification characteristics prior to testing of candidate gene knockdown.

## **Western Blot**

### **Whole cell protein extraction and Western Blot analysis**

Cells were collected, washed with PBS and resuspended in lysis buffer (50 mM Tris, pH 7.4, 150 mM NaCl, 5 mM EDTA, 1% NP-40, 0.5% sodiumdeoxycholate, 0.1% SDS) supplemented with a protease inhibitor cocktail (Roche). The cells were sonicated and lysates were clarified by centrifugation for 20 min at 14,000 x g. The supernatant was collected as the whole-cell extract.

Protein concentrations were determined with the Bio-Rad DC<sup>TM</sup> Protein Assay kit (Bio-Rad). Samples containing equal amounts of protein were subjected to sodium dodecyl sulfate-polyacrilamide gel electrophoresis (4 to 12% Bis-Tris or 3 to 8% Tris Acetate gels; Novex). The proteins were transferred to nitrocellulose membranes using the iBlot® gel transfer system (Invitrogen). Nonspecific sites were blocked by incubation for 15 min at room temperature with 5% nonfat milk and 0.1% Tween 20 in PBS (PBST; pH 7.4), and the membranes were incubated for 2h at room temperature with the primary antibody. Membranes then were washed in PBST; pH 7.4 and treated with the appropriate Horseradish peroxidase (HRP)-conjugated secondary antibody for 2h at room temperature. The immunoblots were washed in PBST, and proteins were detected with an enhanced chemiluminescence detection kit (Amersham Biosciences) and autoradiography. Anti-Actin antibody was used to check for equal protein loading. The intensity of the bands was determined by densitometry.

Primary antibodies used in this paper were mouse anti-Actin (Sigma-Aldrich; A2228), goat anti-ALG10 (Santa-Cruz; sc-109491), rabbit anti-BCHE (Abcam; ab82307), rabbit anti-DPP4 (Sigma-Aldrich; D1445), and rabbit anti-GUCY1B3 (Sigma-Aldrich; HPA020870), mouse anti-MYST1 (Santa-Cruz; sc-130651), mouse anti-PPP3CB (Abcam; ab58161), rabbit anti-PRIC285 (Abcam; ab129781) and rabbit anti-SLC27A2 (Sigma-Aldrich; SAB2102193). Secondary antibodies were HRP-conjugated anti-mouse



(Amersham Bioscience; NA9310), HRP-conjugated anti-rabbit (Amersham Bioscience NA9340) and HRP-conjugated anti-goat (Santa-Cruz; sc-2020).

## **Lifecycle Assays**

### **Lifecycle Assay Scoring System**

To simplify interpretation of these results (fold-rescue values for 4 siRNA duplexes per gene for nine genes), a scoring system was established (**Table S10, Supplemental Methods**). For each lifecycle assay, the fold-rescue values for all siRNA duplexes for a given gene that demonstrated a statistically significant rescue effect were summed (**Table S10**). In this way, strength (fold-rescue) and validity (number of siRNAs that rescued infection) are represented as a single value to aid in interpretation and comparison. Lifecycle rescue scores greater than or equal to four were scored positive, because this represents an average of 2-fold or greater rescue for 2 or more siRNA, the criteria used during the validation round screening.

### **Entry pseudoparticles**

HCV pseudoparticles were generated by cotransfection of plasmids expressing 1) the JFH1 envelope or VSV envelope (a gift from F Cosset), 2) HIV gag – pol (a gift from J Luban), and 3) a ZS green-containing reporter genome (a gift from J Luban) into HEK-293T cells using Lipofectamine 2000 (Invitrogen).

Pseudoparticles were harvested from the supernatant 48 and 72 hours after transfection, clarified then aliquotted and stored at -80°C. Pseudoparticles were titered for infectivity prior to use. Entry assays were performed using identical conditions to the screening assay described above, except JFH1 pseudoparticles replaced infectious JFH1.

### **Replication**

HCV replication was assessed using the OR6 HCV GT1b full genome replicon, a gift from N. Kato.

OR6 cells were grown in Dulbecco's modified Eagle's medium (DMEM) supplemented with 10% fetal

bovine serum (FBS) and 500 ug/ml G418 and cultured at 37°C, 5% CO<sub>2</sub>. Transfections were performed

in identical conditions to siRNA screen. 48h post transfection, cells were treated with IFN- $\alpha$  6IU/ml for 24h. Cells were then lysed and renilla (OR6) and ATP (Cell Titer Glo) signal assessed.

### **HCV RNA production assay**

JFH1 RNA production was assessed at 48h postinfection by performing HCV IEG siRNA transfection identical to those described for the screen assay, but in 24 well plates, followed by isolation of total intracellular RNA and quantification of JFH1 RNA genome by qRT-PCR as described above.

### **Egress and production of fully infectious particles assay**

Egress and production of fully infectious virus were assessed by replicate plating of supernatant from cells transfected as described above for screening assay. At 48 hours post JFH1 infection, the viral supernatant from the transfected cells in the source plate was transferred in a well-by-well manner to a destination plate containing fresh untransfected Huh7.5.1 cells that had been plated 24h prior, and cells were incubated for 48h, then stained using HCV core antibody and Hoechst as described above.

### **shRNA knockdown cells**

Lentiviral pseudoparticles were generated by co-transfection of plasmids expressing distinct PDIP1 shRNAs and a puromycin resistance cassette, HIV-gag pol, and VSV-G envelope into HEK-293T cells. Lentiviral pseudoparticles were transduced into Huh7.5.1 cells followed by puromycin selection. Selected cells were assessed for target gene knockdown using qRT-PCR and western blot and for IFN- $\alpha$ -rescue phenotype using core staining and qRT-PCR.

### **Overexpression**

Plasmids containing long and short isoform PDIP1 and full and truncated BCHE were kindly provided by T. Satoh and J.K. Reddy and R. Chilukuri, respectively. Huh 7.5.1 cells were plated in 6 well dishes then transfected with IEG containing plasmid or vector control using Fugene according to manufacturer's

instructions. After 24h, medium was replaced with fresh 15% DMEM containing JFH1 to yield an MOI of 1. Cells were then incubated for 48h followed by RNA isolation, cDNA preparation, and qRT-PCR.

### **Statistical analysis**

Data are expressed as means  $\pm$  standard error of the mean for at least three independent experiments.

Student's *t* test was used to compare experimental conditions and controls. A *P* value  $<0.05$  was considered significant (\*).

## Supplementary Tables

Table S1: Complete screen data: excel file

Table S2: Potential False Negatives eliminated due to cytotoxicity: excel file

Table S3: IFN-enhancement scores for Dependency Factor K/Ds: excel file

Table S4: Top 120, annotated: excel file

Table S5: IPA analysis results Top 120: included here

Table S6: Are IEGs ISGs?: excel file

Table S7: Comparison to other IEG screens: excel file

Table S8: Primers: included here

Table S9: Phenotype Knockdown Comparison: excel file

Table S10: Lifecycle Rescue Scores: excel file

Table S11: Non-HCV Viral Rescue Scores: excel file

## Table S1. Complete Screen Dataset

|              |             |                        |                   |
|--------------|-------------|------------------------|-------------------|
| 50001.00 A02 | M-003879-00 | cyclin-dependent kin   | 1033.00 CDKN3     |
| 50001.00 A04 | M-003247-02 | cyclin-dependent kin   | 1032.00 CDKN2D    |
| 50001.00 A05 | M-005300-00 | AP2 associated kinas   | 22848.00 AAK1     |
| 50001.00 A06 | M-003246-01 | cyclin-dependent kin   | 1031.00 CDKN2C    |
| 50001.00 A07 | M-005301-01 | apoptosis-associated   | 9625.00 AATK      |
| 50001.00 A08 | M-003245-02 | cyclin-dependent kin   | 1030.00 CDKN2B    |
| 50001.00 A09 | M-004061-00 | ceramide kinase        | 64781.00 CERK     |
| 50001.00 A10 | M-003244-03 | cyclin-dependent kin   | 1028.00 CDKN1C    |
| 50001.00 A11 | M-009511-00 | Rap guanine nucleoti   | 11069.00 RAPGEF4  |
| 50001.00 A12 | M-003472-00 | cyclin-dependent kin   | 1027.00 CDKN1B    |
| 50001.00 A13 | M-003255-02 | CHK1 checkpoint hor    | 1111.00 CHEK1     |
| 50001.00 A14 | M-003471-00 | cyclin-dependent kin   | 1026.00 CDKN1A    |
| 50001.00 A15 | M-003256-05 | CHK2 checkpoint hor    | 11200.00 CHEK2    |
| 50001.00 A16 | M-004799-02 | cyclin-dependent kin   | 6792.00 CDKL5     |
| 50001.00 A17 | M-006704-00 | choline kinase alpha   | 1119.00 CHKA      |
| 50001.00 A18 | M-004798-00 | cyclin-dependent kin   | 51265.00 CDKL3    |
| 50001.00 A19 | M-006705-00 | choline kinase beta    | 1120.00 CHKB      |
| 50001.00 A20 | M-004797-00 | cyclin-dependent kin   | 8999.00 CDKL2     |
| 50001.00 A21 | M-005462-01 | cholinergic receptor,  | 1128.00 CHRM1     |
| 50001.00 A23 | M-003473-01 | conserved helix-loop   | 1147.00 CHUK      |
| 50001.00 B02 | M-011927-00 | integrin beta 1 bindir | 9270.00 ITGB1BP1  |
| 50001.00 B04 | M-004214-01 | hormonally upregula    | 30811.00 HUNK     |
| 50001.00 B05 | M-003257-02 | polo-like kinase 3 (Di | 1263.00 PLK3      |
| 50001.00 B06 | M-007691-01 | CDC42 binding prote    | 55561.00 CDC42BPG |
| 50001.00 B07 | M-012217-00 | connector enhancer     | 10256.00 CNKSR1   |
| 50001.00 B08 | M-004618-00 | serine/threonine kin   | 55351.00 STK32B   |
| 50001.00 B09 | M-012101-00 | collagen, type IV, alp | 10087.00 COL4A3BP |
| 50001.00 B10 | M-005007-00 | eukaryotic translatio  | 27102.00 EIF2AK1  |
| 50001.00 B11 | M-019847-01 | coatomer protein co    | 9276.00 COPB2     |
| 50001.00 B12 | M-006736-00 | hexokinase 3 (white    | 3101.00 HK3       |
| 50001.00 B13 | M-004031-02 | Cdc2-related kinase,   | 51755.00 CRKRS    |
| 50001.00 B14 | M-006735-01 | hexokinase 2           | 3099.00 HK2       |
| 50001.00 B15 | M-012023-01 | v-crk sarcoma virus C  | 1399.00 CRKL      |
| 50001.00 B16 | M-006820-01 | hexokinase 1           | 3098.00 HK1       |
| 50001.00 B17 | M-003109-02 | colony stimulating fa  | 1436.00 CSF1R     |
| 50001.00 B18 | M-004808-02 | homeodomain intera     | 147746.00 HIPK4   |
| 50001.00 B19 | M-003110-02 | c-src tyrosine kinase  | 1445.00 CSK       |
| 50001.00 B20 | M-004810-00 | homeodomain intera     | 10114.00 HIPK3    |
| 50001.00 B21 | M-003957-03 | casein kinase 1, alph  | 1452.00 CSNK1A1   |
| 50001.00 B23 | M-003478-00 | casein kinase 1, delta | 1453.00 CSNK1D    |
| 50001.00 C02 | M-004323-01 | cyclin-dependent kin   | 8814.00 CDKL1     |
| 50001.00 C04 | M-003243-02 | cyclin-dependent kin   | 1025.00 CDK9      |
| 50001.00 C05 | M-013591-01 | cyclin-dependent kin   | 51550.00 CINP     |
| 50001.00 C06 | M-003242-02 | cyclin-dependent kin   | 1024.00 CDK8      |

|              |             |                          |                   |
|--------------|-------------|--------------------------|-------------------|
| 50001.00 C07 | M-004613-00 | citron (rho-interactin   | 11113.00 CIT      |
| 50001.00 C08 | M-003241-01 | cyclin-dependent kin     | 1022.00 CDK7      |
| 50001.00 C09 | M-006706-01 | creatine kinase, brair   | 1152.00 CKB       |
| 50001.00 C10 | M-003240-02 | cyclin-dependent kin     | 1021.00 CDK6      |
| 50001.00 C11 | M-006707-00 | creatine kinase, musc    | 1158.00 CKM       |
| 50001.00 C12 | M-012957-00 | CDK5 regulatory sub      | 80279.00 CDK5RAP3 |
| 50001.00 C13 | M-006708-00 | creatine kinase, mito    | 1159.00 CKMT1B    |
| 50001.00 C14 | M-013297-01 | CDK5 regulatory sub      | 51654.00 CDK5RAP1 |
| 50001.00 C15 | M-006709-00 | creatine kinase, mito    | 1160.00 CKMT2     |
| 50001.00 C16 | M-008885-00 | cyclin-dependent kin     | 8941.00 CDK5R2    |
| 50001.00 C17 | M-004586-01 | CDC28 protein kinase     | 1163.00 CKS1B     |
| 50001.00 C18 | M-008988-00 | cyclin-dependent kin     | 8851.00 CDK5R1    |
| 50001.00 C19 | M-007678-00 | CDC28 protein kinase     | 1164.00 CKS2      |
| 50001.00 C20 | M-003239-01 | cyclin-dependent kin     | 1020.00 CDK5      |
| 50001.00 C21 | M-004800-00 | CDC-like kinase 1        | 1195.00 CLK1      |
| 50001.00 C23 | M-004801-01 | CDC-like kinase 2        | 1196.00 CLK2      |
| 50001.00 D02 | M-003266-03 | homeodomain intera       | 28996.00 HIPK2    |
| 50001.00 D04 | M-004809-02 | homeodomain intera       | 204851.00 HIPK1   |
| 50001.00 D05 | M-003479-01 | casein kinase 1, epsil   | 1454.00 CSNK1E    |
| 50001.00 D06 | M-003141-02 | hemopoietic cell kin     | 3055.00 HCK       |
| 50001.00 D07 | M-004666-01 | casein kinase 1, gam     | 53944.00 CSNK1G1  |
| 50001.00 D08 | M-005330-02 | alpha-kinase 2           | 115701.00 ALPK2   |
| 50001.00 D09 | M-004678-00 | casein kinase 1, gam     | 1455.00 CSNK1G2   |
| 50001.00 D10 | M-005006-00 | heat shock 22kDa pr      | 26353.00 HSPB8    |
| 50001.00 D11 | M-004679-02 | casein kinase 1, gam     | 1456.00 CSNK1G3   |
| 50001.00 D12 | M-006734-01 | guanylate kinase 1       | 2987.00 GUK1      |
| 50001.00 D13 | M-003475-00 | casein kinase 2, alph    | 1457.00 CSNK2A1   |
| 50001.00 D14 | M-004515-01 | guanylate cyclase 2F,    | 2986.00 GUCY2F    |
| 50001.00 D15 | M-004752-00 | casein kinase 2, alph    | 1459.00 CSNK2A2   |
| 50001.00 D16 | M-005329-01 | guanylate cyclase 2D     | 3000.00 GUCY2D    |
| 50001.00 D17 | M-007679-00 | casein kinase 2, beta    | 1460.00 CSNK2B    |
| 50001.00 D18 | M-005328-00 | guanylate cyclase 2C     | 2984.00 GUCY2C    |
| 50001.00 D19 | M-007871-00 | chemokine (C-X-C mo      | 3627.00 CXCL10    |
| 50001.00 D20 | M-010924-00 | general transcription    | 2965.00 GTF2H1    |
| 50001.00 D21 | M-004417-02 | death-associated prc     | 1612.00 DAPK1     |
| 50001.00 D23 | M-004418-02 | death-associated prc     | 23604.00 DAPK2    |
| 50001.00 E02 | M-003238-02 | cyclin-dependent kin     | 1019.00 CDK4      |
| 50001.00 E04 | M-003237-01 | cyclin-dependent kin     | 1018.00 CDK3      |
| 50001.00 E05 | M-004802-01 | CDC-like kinase 3        | 1198.00 CLK3      |
| 50001.00 E06 | M-003236-04 | cyclin-dependent kin     | 1017.00 CDK2      |
| 50001.00 E07 | M-004803-00 | CDC-like kinase 4        | 57396.00 CLK4     |
| 50001.00 E08 | M-004689-00 | cell division cycle 2-li | 23097.00 CDC2L6   |
| 50001.00 E09 | M-003100-01 | c-abl oncogene 1, rec    | 25.00 ABL1        |
| 50001.00 E10 | M-003235-04 | cyclin-dependent kin     | 8558.00 CDK10     |
| 50001.00 E11 | M-003101-01 | v-abl Abelson murine     | 27.00 ABL2        |
| 50001.00 E12 | M-003234-02 | cell division cycle 7 h  | 8317.00 CDC7      |
| 50001.00 E13 | M-003102-02 | tyrosine kinase, non-    | 10188.00 TNK2     |

|              |             |                          |                  |
|--------------|-------------|--------------------------|------------------|
| 50001.00 E14 | M-004075-01 | CDC42 binding prote      | 9578.00 CDC42BPB |
| 50001.00 E15 | M-004924-01 | activin A receptor, ty   | 90.00 ACVR1      |
| 50001.00 E16 | M-003814-02 | CDC42 binding prote      | 8476.00 CDC42BPA |
| 50001.00 E17 | M-004925-01 | activin A receptor, ty   | 91.00 ACVR1B     |
| 50001.00 E18 | M-004688-00 | cell division cycle 2-li | 8621.00 CDC2L5   |
| 50001.00 E19 | M-004926-01 | activin A receptor, ty   | 92.00 ACVR2A     |
| 50001.00 E20 | M-004026-01 | cell division cycle 2-li | 985.00 CDC2L2    |
| 50001.00 E21 | M-004927-00 | activin A receptor, ty   | 93.00 ACVR2B     |
| 50001.00 E23 | M-005302-02 | activin A receptor ty    | 94.00 ACVRL1     |
| 50001.00 F02 | M-003010-03 | glycogen synthase ki     | 2932.00 GSK3B    |
| 50001.00 F04 | M-003009-01 | glycogen synthase ki     | 2931.00 GSK3A    |
| 50001.00 F05 | M-004947-00 | death-associated pro     | 1613.00 DAPK3    |
| 50001.00 F06 | M-005327-00 | germ cell associated     | 83903.00 GSG2    |
| 50001.00 F07 | M-004884-01 | doublecortin-like kin    | 9201.00 DCLK1    |
| 50001.00 F08 | M-004628-00 | G protein-coupled re     | 131890.00 GRK7   |
| 50001.00 F09 | M-006710-00 | deoxycytidine kinase     | 1633.00 DCK      |
| 50001.00 F10 | M-004627-01 | G protein-coupled re     | 2870.00 GRK6     |
| 50001.00 F11 | M-003111-03 | discoidin domain rec     | 780.00 DDR1      |
| 50001.00 F12 | M-004626-00 | G protein-coupled re     | 2869.00 GRK5     |
| 50001.00 F13 | M-003112-03 | discoidin domain rec     | 4921.00 DDR2     |
| 50001.00 F14 | M-004625-00 | G protein-coupled re     | 2868.00 GRK4     |
| 50001.00 F15 | M-006711-02 | diacylglycerol kinase,   | 1606.00 DGKA     |
| 50001.00 F16 | M-006729-00 | glucosamine (UDP-N       | 10020.00 GNE     |
| 50001.00 F17 | M-006712-01 | diacylglycerol kinase,   | 1607.00 DGKB     |
| 50001.00 F18 | M-019878-01 | glia maturation facto    | 9535.00 GMFG     |
| 50001.00 F19 | M-006713-03 | diacylglycerol kinase,   | 8527.00 DGKD     |
| 50001.00 F20 | M-019100-00 | glia maturation facto    | 2764.00 GMFB     |
| 50001.00 F21 | M-011493-00 | diacylglycerol kinase,   | 8526.00 DGKE     |
| 50001.00 F23 | M-006715-00 | diacylglycerol kinase,   | 1608.00 DGKG     |
| 50001.00 G02 | M-004687-01 | cell division cycle 2-li | 984.00 CDC2L1    |
| 50001.00 G04 | M-003224-03 | cell division cycle 2, C | 983.00 CDC2      |
| 50001.00 G05 | M-004504-02 | ADAM metalloptic         | 8754.00 ADAM9    |
| 50001.00 G06 | M-007732-00 | cytidine and dCMP d      | 81602.00 CDADC1  |
| 50001.00 G07 | M-005303-02 | aarF domain containi     | 57143.00 ADCK1   |
| 50001.00 G08 | M-013630-02 | CD7 molecule             | 924.00 CD7       |
| 50001.00 G09 | M-005304-01 | aarF domain containi     | 90956.00 ADCK2   |
| 50001.00 G10 | M-005234-01 | CD4 molecule             | 920.00 CD4       |
| 50001.00 G11 | M-005305-01 | aarF domain containi     | 79934.00 ADCK4   |
| 50001.00 G12 | M-003775-01 | CD3e molecule, epsil     | 916.00 CD3E      |
| 50001.00 G13 | M-018919-00 | aarF domain containi     | 203054.00 ADCK5  |
| 50001.00 G14 | M-004686-01 | cell cycle related kin   | 23552.00 CCRK    |
| 50001.00 G15 | M-004733-02 | adenosine kinase         | 132.00 ADK       |
| 50001.00 G16 | M-007843-01 | chemokine (C-C moti      | 6351.00 CCL4     |
| 50001.00 G17 | M-005419-00 | adrenergic, alpha-1A     | 148.00 ADRA1A    |
| 50001.00 G18 | M-007831-00 | chemokine (C-C moti      | 6347.00 CCL2     |
| 50001.00 G19 | M-005420-01 | adrenergic, alpha-1B     | 147.00 ADRA1B    |
| 50001.00 G20 | M-005311-01 | calcium/calmodulin-r     | 8573.00 CASK     |

|          |     |             |                        |           |         |
|----------|-----|-------------|------------------------|-----------|---------|
| 50001.00 | G21 | M-005426-01 | adrenergic, beta-2-, i | 154.00    | ADRB2   |
| 50001.00 | G23 | M-004325-01 | adrenergic, beta, rec  | 156.00    | ADRBK1  |
| 50001.00 | H02 | M-015091-01 | glycerol kinase 2      | 2712.00   | GK2     |
| 50001.00 | H04 | M-006727-00 | glycerol kinase        | 2710.00   | GK      |
| 50001.00 | H05 | M-006717-01 | diacylglycerol kinase, | 9162.00   | DGKI    |
| 50001.00 | H06 | M-007914-00 | GDNF family recepto    | 2675.00   | GFRA2   |
| 50001.00 | H07 | M-005079-02 | diacylglycerol kinase, | 1609.00   | DGKQ    |
| 50001.00 | H08 | M-010819-01 | glucokinase (hexokin   | 2645.00   | GCK     |
| 50001.00 | H09 | M-006718-00 | diacylglycerol kinase, | 8525.00   | DGKZ    |
| 50001.00 | H10 | M-011663-00 | growth associated pr   | 2596.00   | GAP43   |
| 50001.00 | H11 | M-006719-02 | deoxyguanosine kina    | 1716.00   | DGUOK   |
| 50001.00 | H12 | M-006725-00 | galactokinase 2        | 2585.00   | GALK2   |
| 50001.00 | H13 | M-004949-00 | unc-51-like kinase 3 ( | 25989.00  | ULK3    |
| 50001.00 | H14 | M-007728-01 | galactokinase 1        | 2584.00   | GALK1   |
| 50001.00 | H15 | M-005313-01 | EPH receptor A6        | 285220.00 | EPHA6   |
| 50001.00 | H16 | M-005005-01 | cyclin G associated ki | 2580.00   | GAK     |
| 50001.00 | H17 | M-006808-00 | dihydroxyacetone kir   | 26007.00  | DAK     |
| 50001.00 | H18 | M-003140-03 | FYN oncogene relate    | 2534.00   | FYN     |
| 50001.00 | H19 | M-025870-00 | homolog of rat pragr   | 157285.00 | PRAGMIN |
| 50001.00 | H20 | M-020174-01 | FYN binding protein (  | 2533.00   | FYB     |
| 50001.00 | H21 | M-003113-01 | serine/threonine/tyr   | 55359.00  | STYK1   |
| 50001.00 | H23 | M-009415-00 | discs, large homolog   | 1739.00   | DLG1    |
| 50001.00 | I02 | M-006815-00 | carbohydrate kinase-   | 23729.00  | CARKL   |
| 50001.00 | I04 | M-005013-01 | TNNI3 interacting kir  | 51086.00  | TNNI3K  |
| 50001.00 | I05 | M-004326-00 | adrenergic, beta, rec  | 157.00    | ADRBK2  |
| 50001.00 | I06 | M-004397-00 | caspase recruitment    | 79092.00  | CARD14  |
| 50001.00 | I07 | M-005429-01 | angiotensin II recept  | 186.00    | AGTR2   |
| 50001.00 | I08 | M-004395-00 | caspase recruitment    | 29775.00  | CARD10  |
| 50001.00 | I09 | M-006811-02 | adenylate kinase 1     | 203.00    | AK1     |
| 50001.00 | I10 | M-004842-01 | calcium/calmodulin-i   | 10645.00  | CAMKK2  |
| 50001.00 | I11 | M-006812-00 | adenylate kinase 2     | 204.00    | AK2     |
| 50001.00 | I12 | M-004912-00 | calcium/calmodulin-i   | 84254.00  | CAMKK1  |
| 50001.00 | I13 | M-006700-01 | adenylate kinase 3-li  | 205.00    | AK3L1   |
| 50001.00 | I14 | M-004944-01 | calcium/calmodulin-i   | 814.00    | CAMK4   |
| 50001.00 | I15 | M-006701-00 | adenylate kinase 3     | 50808.00  | AK3     |
| 50001.00 | I16 | M-004536-01 | calcium/calmodulin-i   | 818.00    | CAMK2G  |
| 50001.00 | I17 | M-004897-02 | adenylate kinase 5     | 26289.00  | AK5     |
| 50001.00 | I18 | M-004042-02 | calcium/calmodulin-i   | 817.00    | CAMK2D  |
| 50001.00 | I19 | M-007257-00 | adenylate kinase 7     | 122481.00 | AK7     |
| 50001.00 | I20 | M-004943-03 | calcium/calmodulin-i   | 816.00    | CAMK2B  |
| 50001.00 | I21 | M-011426-01 | A kinase (PRKA) anch   | 8165.00   | AKAP1   |
| 50001.00 | I23 | M-009277-01 | A kinase (PRKA) anch   | 11215.00  | AKAP11  |
| 50001.00 | J02 | M-007255-00 | fucokinase             | 197258.00 | FUK     |
| 50001.00 | J04 | M-003139-01 | fyn-related kinase     | 2444.00   | FRK     |
| 50001.00 | J05 | M-011252-01 | discs, large homolog   | 1740.00   | DLG2    |
| 50001.00 | J06 | M-006691-00 | frataxin               | 2395.00   | FXN     |
| 50001.00 | J07 | M-009462-01 | discs, large homolog   | 1741.00   | DLG3    |



|              |             |                        |                    |
|--------------|-------------|------------------------|--------------------|
| 50001.00 J08 | M-003008-01 | FK506 binding protei   | 2475.00 FRAP1      |
| 50001.00 J09 | M-007882-01 | discs, large homolog   | 1742.00 DLG4       |
| 50001.00 J10 | M-006817-00 | fructosamine-3-kinas   | 79672.00 FN3KRP    |
| 50001.00 J11 | M-004637-00 | dystrophia myotonic    | 1760.00 DMPK       |
| 50001.00 J12 | M-006724-00 | fructosamine 3 kinas   | 64122.00 FN3K      |
| 50001.00 J13 | M-012251-00 | DnaJ (Hsp40) homolc    | 5611.00 DNAJC3     |
| 50001.00 J14 | M-003138-01 | fms-related tyrosine   | 2324.00 FLT4       |
| 50001.00 J15 | M-011254-00 | docking protein 1, 62  | 1796.00 DOK1       |
| 50001.00 J16 | M-003137-01 | fms-related tyrosine   | 2322.00 FLT3       |
| 50001.00 J17 | M-006720-00 | deoxythymidylate kir   | 1841.00 DTYMK      |
| 50001.00 J18 | M-003136-02 | fms-related tyrosine   | 2321.00 FLT1       |
| 50001.00 J19 | M-003484-02 | dual specificity phosp | 1843.00 DUSP1      |
| 50001.00 J20 | M-007727-00 | tetra-peptide repeat   | 348825.00 TPRXL    |
| 50001.00 J21 | M-003965-01 | dual specificity phosp | 11221.00 DUSP10    |
| 50001.00 J23 | M-003565-01 | dual specificity phosp | 1844.00 DUSP2      |
| 50001.00 K02 | M-004942-00 | calcium/calmodulin-r   | 815.00 CAMK2A      |
| 50001.00 K04 | M-004941-01 | calcium/calmodulin-r   | 57172.00 CAMK1G    |
| 50001.00 K05 | M-008868-01 | A kinase (PRKA) anch   | 11214.00 AKAP13    |
| 50001.00 K06 | M-004946-00 | calcium/calmodulin-r   | 57118.00 CAMK1D    |
| 50001.00 K07 | M-009765-01 | A kinase (PRKA) anch   | 10566.00 AKAP3     |
| 50001.00 K08 | M-004940-00 | calcium/calmodulin-r   | 8536.00 CAMK1      |
| 50001.00 K09 | M-008442-00 | A kinase (PRKA) anch   | 8852.00 AKAP4      |
| 50001.00 K10 | M-019939-01 | calmodulin 3 (phospl   | 808.00 CALM3       |
| 50001.00 K11 | M-011954-00 | A kinase (PRKA) anch   | 9495.00 AKAP5      |
| 50001.00 K12 | M-006703-02 | inositol 1,3,4,5,6-per | 64768.00 IPPK      |
| 50001.00 K13 | M-008497-01 | A kinase (PRKA) anch   | 9472.00 AKAP6      |
| 50001.00 K14 | M-003633-01 | tribbles homolog 1 (I  | 10221.00 TRIB1     |
| 50001.00 K15 | M-013371-00 | A kinase (PRKA) anch   | 9465.00 AKAP7      |
| 50001.00 K16 | M-018324-01 | chromosome 7 open      | 10842.00 C7orf16   |
| 50001.00 K17 | M-009656-01 | A kinase (PRKA) anch   | 10270.00 AKAP8     |
| 50001.00 K18 | M-007254-01 | chromosome 6 open      | 221264.00 C6orf199 |
| 50001.00 K19 | M-003000-01 | v-akt murine thymor    | 207.00 AKT1        |
| 50001.00 K20 | M-003754-01 | tribbles homolog 3 (I  | 57761.00 TRIB3     |
| 50001.00 K21 | M-003001-01 | v-akt murine thymor    | 208.00 AKT2        |
| 50001.00 K23 | M-003002-01 | v-akt murine thymor    | 10000.00 AKT3      |
| 50001.00 L02 | M-005326-00 | mixed lineage kinase   | 197259.00 MLKL     |
| 50001.00 L04 | M-006803-00 | chromosome 9 open      | 158067.00 C9orf98  |
| 50001.00 L05 | M-004517-00 | dual specificity phosp | 56940.00 DUSP22    |
| 50001.00 L06 | M-004052-02 | NIMA (never in mito:   | 152110.00 NEK10    |
| 50001.00 L07 | M-003963-02 | dual specificity phosp | 1846.00 DUSP4      |
| 50001.00 L08 | M-004624-00 | hypothetical protein   | 124923.00 FLJ25006 |
| 50001.00 L09 | M-003566-01 | dual specificity phosp | 1847.00 DUSP5      |
| 50001.00 L10 | M-005321-00 | hypothetical protein   | 84197.00 FLJ23356  |
| 50001.00 L11 | M-003964-01 | dual specificity phosp | 1848.00 DUSP6      |
| 50001.00 L12 | M-005320-01 | leucine-rich repeat ki | 79705.00 LRRK1     |
| 50001.00 L13 | M-003567-00 | dual specificity phosp | 1849.00 DUSP7      |
| 50001.00 L14 | M-004843-00 | yeast Sps1/Ste20-rel   | 80122.00 YSK4      |

|              |             |                                               |                  |
|--------------|-------------|-----------------------------------------------|------------------|
| 50001.00 L15 | M-003568-00 | dual specificity phosphatase 8                | 1850.00 DUSP8    |
| 50001.00 L16 | M-007253-00 | threonine synthase-like 1                     | 79896.00 THNSL1  |
| 50001.00 L17 | M-004805-00 | dual-specificity tyrosine phosphatase 1A      | 1859.00 DYRK1A   |
| 50001.00 L18 | M-005319-01 | unc-51-like kinase 4 (ULK4)                   | 54986.00 ULK4    |
| 50001.00 L19 | M-004806-01 | dual-specificity tyrosine phosphatase 1B      | 9149.00 DYRK1B   |
| 50001.00 L20 | M-004020-03 | microtubule-associated protein 4              | 84930.00 MASTL   |
| 50001.00 L21 | M-004730-02 | dual-specificity tyrosine phosphatase 2       | 8445.00 DYRK2    |
| 50001.00 L23 | M-004731-00 | dual-specificity tyrosine phosphatase 3       | 8444.00 DYRK3    |
| 50001.00 M02 | M-003108-01 | TP53 regulating kinase                        | 112858.00 TP53RK |
| 50001.00 M04 | M-005310-00 | testis-specific serine/threonine kinase 4     | 283629.00 TSSK4  |
| 50001.00 M05 | M-003103-02 | anaplastic lymphoma kinase                    | 238.00 ALK       |
| 50001.00 M06 | M-004101-00 | BUB1 budding uninhibited by benzimidazole 1   | 701.00 BUB1B     |
| 50001.00 M07 | M-004929-01 | activin A receptor, type 1                    | 130399.00 ACVR1C |
| 50001.00 M08 | M-004102-00 | BUB1 budding uninhibited by benzimidazole 1   | 699.00 BUB1      |
| 50001.00 M09 | M-005306-01 | amyotrophic lateral sclerosis 2               | 55437.00 ALS2CR2 |
| 50001.00 M10 | M-003107-01 | Bruton agammaglobulinemia protein kinase      | 695.00 BTK       |
| 50001.00 M11 | M-004685-01 | PFTAIRE protein kinase                        | 65061.00 PFTK2   |
| 50001.00 M12 | M-004938-01 | bromodomain, testis-specific                  | 676.00 BRDT      |
| 50001.00 M13 | M-005307-01 | anti-Mullerian hormone receptor type 2        | 269.00 AMHR2     |
| 50001.00 M14 | M-004935-01 | bromodomain containing protein 2              | 6046.00 BRD2     |
| 50001.00 M15 | M-007803-00 | angiopoietin 4                                | 51378.00 ANGPT4  |
| 50001.00 M16 | M-003460-01 | v-raf murine sarcoma oncogene                 | 673.00 BRAF      |
| 50001.00 M17 | M-004930-01 | ankyrin repeat and kinase domain containing 1 | 255239.00 ANKK1  |
| 50001.00 M18 | M-003106-02 | BMX non-receptor tyrosine kinase              | 660.00 BMX       |
| 50001.00 M19 | M-005308-02 | receptor-interacting protein 4                | 54101.00 RIPK4   |
| 50001.00 M20 | M-005309-02 | bone morphogenetic protein receptor type 2    | 659.00 BMPR2     |
| 50001.00 M21 | M-007687-01 | SPEG complex locus                            | 10290.00 SPEG    |
| 50001.00 M23 | M-005138-00 | adaptor protein, phosphotyrosine-binding      | 26060.00 APPL1   |
| 50001.00 N02 | M-006318-00 | NAD kinase                                    | 65220.00 NADK    |
| 50001.00 N04 | M-007726-00 | IQ motif containing protein 1                 | 64799.00 IQCH    |
| 50001.00 N05 | M-004732-01 | dual-specificity tyrosine phosphatase 4       | 8798.00 DYRK4    |
| 50001.00 N06 | M-007260-00 | riboflavin kinase                             | 55312.00 RFK     |
| 50001.00 N07 | M-017723-01 | endothelin 2                                  | 1907.00 EDN2     |
| 50001.00 N08 | M-007256-00 | acylglycerol kinase                           | 55750.00 AGK     |
| 50001.00 N09 | M-004950-00 | eukaryotic elongation factor 2                | 29904.00 EEF2K   |
| 50001.00 N10 | M-005078-00 | ethanolamine kinase                           | 55224.00 ETNK2   |
| 50001.00 N11 | M-003114-01 | epidermal growth factor receptor              | 1956.00 EGFR     |
| 50001.00 N12 | M-005318-00 | SCY1-like 2 (S. cerevisiae)                   | 55681.00 SCYL2   |
| 50001.00 N13 | M-004883-01 | eukaryotic translation initiation factor 2A3  | 9451.00 EIF2AK3  |
| 50001.00 N14 | M-003135-02 | Gardner-Rasheed fibrosarcoma                  | 2268.00 FGR      |
| 50001.00 N15 | M-005314-00 | eukaryotic translation initiation factor 2A4  | 27104.00 EIF2AK4 |
| 50001.00 N16 | M-003134-01 | fibroblast growth factor receptor 4           | 2264.00 FGFR4    |
| 50001.00 N17 | M-006721-01 | ethanolamine kinase                           | 55500.00 ETNK1   |
| 50001.00 N18 | M-003133-01 | fibroblast growth factor receptor 3           | 2261.00 FGFR3    |
| 50001.00 N19 | M-007676-00 | Rap guanine nucleotide exchange factor 3      | 10411.00 RAPGEF3 |
| 50001.00 N20 | M-003132-01 | fibroblast growth factor receptor 2           | 2263.00 FGFR2    |
| 50001.00 N21 | M-003115-02 | EPH receptor A1                               | 2041.00 EPHA1    |

|              |             |                                       |           |         |
|--------------|-------------|---------------------------------------|-----------|---------|
| 50001.00 N23 | M-003116-01 | EPH receptor A2                       | 1969.00   | EPHA2   |
| 50001.00 O02 | M-004934-01 | bone morphogenetic                    | 658.00    | BMPR1B  |
| 50001.00 O04 | M-004933-03 | bone morphogenetic                    | 657.00    | BMPR1A  |
| 50001.00 O05 | M-003563-02 | v-raf murine sarcoma                  | 369.00    | ARAF    |
| 50001.00 O06 | M-005071-00 | BMP2 inducible kinase                 | 55589.00  | BMP2K   |
| 50001.00 O07 | M-004931-00 | NUAK family, SNF1-like                | 9891.00   | NUAK1   |
| 50001.00 O08 | M-020353-01 | B-cell linker                         | 29760.00  | BLNK    |
| 50001.00 O09 | M-004165-01 | DBF4 homolog (S. cerevisiae)          | 10926.00  | DBF4    |
| 50001.00 O10 | M-003105-03 | B lymphoid tyrosine kinase            | 640.00    | BLK     |
| 50001.00 O11 | M-013023-00 | roporin 1-like                        | 83853.00  | ROPN1L  |
| 50001.00 O12 | M-005436-00 | bradykinin receptor 1                 | 624.00    | BDKRB2  |
| 50001.00 O13 | M-003201-02 | ataxia telangiectasia                 | 472.00    | ATM     |
| 50001.00 O14 | M-003875-04 | breakpoint cluster region             | 613.00    | BCR     |
| 50001.00 O15 | M-003202-04 | ataxia telangiectasia                 | 545.00    | ATR     |
| 50001.00 O16 | M-004932-00 | branched chain ketoglutarate          | 10295.00  | BCKDK   |
| 50001.00 O17 | M-003326-02 | aurora kinase B                       | 9212.00   | AURKB   |
| 50001.00 O18 | M-008914-00 | azurocidin 1 (cationic protein)       | 566.00    | AZU1    |
| 50001.00 O19 | M-019573-01 | aurora kinase C                       | 6795.00   | AURKC   |
| 50001.00 O20 | M-003104-02 | AXL receptor tyrosine kinase          | 558.00    | AXL     |
| 50001.00 O21 | M-003631-01 | arginine vasopressin receptor         | 552.00    | AVPR1A  |
| 50001.00 O23 | M-005431-00 | arginine vasopressin receptor         | 553.00    | AVPR1B  |
| 50001.00 P02 | M-003131-02 | fibroblast growth factor receptor     | 2260.00   | FGFR1   |
| 50001.00 P04 | M-003130-01 | feline sarcoma oncogene               | 2242.00   | FES     |
| 50001.00 P05 | M-003117-02 | EPH receptor A3                       | 2042.00   | EPHA3   |
| 50001.00 P06 | M-003129-01 | fer (fps/fes related) tyrosine kinase | 2241.00   | FER     |
| 50001.00 P07 | M-003118-01 | EPH receptor A4                       | 2043.00   | EPHA4   |
| 50001.00 P08 | M-005317-02 | Fas-activated serine/threonine kinase | 10922.00  | FASTK   |
| 50001.00 P09 | M-005315-02 | EPH receptor A5                       | 2044.00   | EPHA5   |
| 50001.00 P10 | M-006530-01 | ecotropic viral integrase             | 2122.00   | EVI1    |
| 50001.00 P11 | M-003119-01 | EPH receptor A7                       | 2045.00   | EPHA7   |
| 50001.00 P12 | M-004951-01 | endoplasmic reticulum chaperone       | 2081.00   | ERN1    |
| 50001.00 P13 | M-003120-02 | EPH receptor A8                       | 2046.00   | EPHA8   |
| 50001.00 P14 | M-004807-01 | mitogen-activated protein kinase      | 225689.00 | MAPK15  |
| 50001.00 P15 | M-003121-01 | EPH receptor B1                       | 2047.00   | EPHB1   |
| 50001.00 P16 | M-003128-02 | v-erb-a erythroblast transformation   | 2066.00   | ERBB4   |
| 50001.00 P17 | M-003122-01 | EPH receptor B2                       | 2048.00   | EPHB2   |
| 50001.00 P18 | M-003127-02 | v-erb-b2 erythroblast transformation  | 2065.00   | ERBB3   |
| 50001.00 P19 | M-003123-02 | EPH receptor B3                       | 2049.00   | EPHB3   |
| 50001.00 P20 | M-003126-01 | v-erb-b2 erythroblast transformation  | 2064.00   | ERBB2   |
| 50001.00 P21 | M-003124-01 | EPH receptor B4                       | 2050.00   | EPHB4   |
| 50001.00 P23 | M-003125-01 | EPH receptor B6                       | 2051.00   | EPHB6   |
|              |             |                                       |           | mdmdMAD |
|              |             |                                       |           | 3MAD    |
|              |             |                                       |           | MADc    |
| 50001.00 C22 |             |                                       |           |         |
| 50001.00 D22 |             |                                       |           |         |
| 50001.00 E22 |             |                                       |           |         |

50001.00 F22

mn

sd

50001.00 G22

50001.00 H22

50001.00 I22

50001.00 J22

mn

sd

3psSD

3ngSD

SumSD

MeanDf

SumovrMn

1minus

| <u>% inf</u> | <u>abs dev</u> | <u>robust Z</u> | <u>% inf</u> | <u>abs dev</u> | <u>robust Z</u> | <u>% inf</u> | <u>abs dev</u> | <u>robust Z</u> |
|--------------|----------------|-----------------|--------------|----------------|-----------------|--------------|----------------|-----------------|
| 9.15         | 1.88           | 0.49            | 19.88        | 11.71          | 2.61            | 10.57        | 0.60           | -0.12           |
| 10.52        | 3.25           | 0.84            | 10.68        | 2.51           | 0.56            | 7.50         | 3.67           | -0.75           |
| 9.99         | 2.72           | 0.71            | 3.89         | 4.28           | -0.95           | 8.68         | 2.49           | -0.51           |
| 3.81         | 3.46           | -0.90           | 13.69        | 5.52           | 1.23            | 4.94         | 6.23           | -1.28           |
| 7.05         | 0.22           | -0.06           | 12.15        | 3.98           | 0.89            | 12.54        | 1.37           | 0.28            |
| 11.10        | 3.83           | 0.99            | 18.94        | 10.77          | 2.40            | 10.22        | 0.95           | -0.20           |
| 10.70        | 3.43           | 0.89            | 15.74        | 7.57           | 1.69            | 9.50         | 1.67           | -0.34           |
| 7.18         | 0.09           | -0.02           | 11.51        | 3.34           | 0.74            | 11.34        | 0.17           | 0.04            |
| 4.97         | 2.30           | -0.60           | 7.68         | 0.49           | -0.11           | 17.23        | 6.06           | 1.24            |
| 5.52         | 1.75           | -0.46           | 12.06        | 3.89           | 0.87            | 8.63         | 2.54           | -0.52           |
| 22.31        | 15.04          | 3.91            | 19.60        | 11.43          | 2.54            | 66.93        | 55.76          | 11.46           |
| 7.57         | 0.30           | 0.08            | 11.27        | 3.10           | 0.69            | 5.72         | 5.45           | -1.12           |
| 8.38         | 1.11           | 0.29            | 13.84        | 5.67           | 1.26            | 10.02        | 1.15           | -0.24           |
| 7.57         | 0.30           | 0.08            | 16.34        | 8.17           | 1.82            | 13.37        | 2.20           | 0.45            |
| 8.39         | 1.12           | 0.29            | 12.88        | 4.71           | 1.05            | 21.71        | 10.54          | 2.16            |
| 5.06         | 2.21           | -0.58           | 10.86        | 2.69           | 0.60            | 8.87         | 2.30           | -0.47           |
| 8.57         | 1.30           | 0.34            | 8.79         | 0.62           | 0.14            | 6.50         | 4.67           | -0.96           |
| 3.83         | 3.44           | -0.90           | 14.04        | 5.87           | 1.31            | 15.80        | 4.63           | 0.95            |
| 4.80         | 2.47           | -0.64           | 13.41        | 5.24           | 1.17            | 9.86         | 1.31           | -0.27           |
| 5.04         | 2.23           | -0.58           | 9.09         | 0.92           | 0.21            | 6.10         | 5.07           | -1.04           |
| 9.72         | 2.45           | 0.64            | 7.05         | 1.12           | -0.25           | 8.21         | 2.96           | -0.61           |
| 7.00         | 0.27           | -0.07           | 4.87         | 3.30           | -0.73           | 5.15         | 6.02           | -1.24           |
| 10.22        | 2.95           | 0.77            | 8.44         | 0.27           | 0.06            | 9.60         | 1.57           | -0.32           |
| 9.85         | 2.58           | 0.67            | 5.99         | 2.18           | -0.49           | 9.47         | 1.70           | -0.35           |
| 10.82        | 3.55           | 0.92            | 5.28         | 2.89           | -0.64           | 4.93         | 6.24           | -1.28           |
| 13.16        | 5.89           | 1.53            | 9.32         | 1.15           | 0.26            | 12.30        | 1.13           | 0.23            |
| 25.49        | 18.22          | 4.74            | 13.16        | 4.99           | 1.11            | 23.43        | 12.26          | 2.52            |
| 14.49        | 7.22           | 1.88            | 11.56        | 3.39           | 0.75            | 19.77        | 8.60           | 1.77            |
| 29.52        | 22.25          | 5.78            | 20.61        | 12.44          | 2.77            | 31.51        | 20.34          | 4.18            |
| 8.11         | 0.84           | 0.22            | 9.37         | 1.20           | 0.27            | 9.54         | 1.63           | -0.33           |
| 1.73         | 5.54           | -1.44           | 4.71         | 3.46           | -0.77           | 3.94         | 7.23           | -1.49           |
| 8.86         | 1.59           | 0.41            | 9.15         | 0.98           | 0.22            | 10.07        | 1.10           | -0.23           |
| 18.21        | 10.94          | 2.84            | 10.40        | 2.23           | 0.50            | 9.22         | 1.95           | -0.40           |
| 7.64         | 0.37           | 0.09            | 3.05         | 5.12           | -1.14           | 9.39         | 1.78           | -0.37           |
| 6.40         | 0.87           | -0.23           | 3.64         | 4.53           | -1.01           | 5.54         | 5.63           | -1.16           |
| 3.08         | 4.19           | -1.09           | 5.88         | 2.29           | -0.51           | 7.40         | 3.77           | -0.77           |
| 4.48         | 2.79           | -0.73           | 6.32         | 1.85           | -0.41           | 11.36        | 0.19           | 0.04            |
| 4.77         | 2.50           | -0.65           | 7.04         | 1.13           | -0.25           | 11.45        | 0.28           | 0.06            |
| 4.05         | 3.22           | -0.84           | 3.24         | 4.93           | -1.10           | 9.17         | 2.00           | -0.41           |
| 8.84         | 1.57           | 0.41            | 9.30         | 1.13           | 0.25            | 9.81         | 1.36           | -0.28           |
| 12.48        | 5.21           | 1.35            | 2.99         | 5.18           | -1.15           | 12.69        | 1.52           | 0.31            |
| 8.90         | 1.63           | 0.42            | 2.69         | 5.48           | -1.22           | 19.62        | 8.45           | 1.74            |
| 6.50         | 0.77           | -0.20           | 3.34         | 4.83           | -1.07           | 17.56        | 6.39           | 1.31            |
| 2.69         | 4.58           | -1.19           | 0.89         | 7.28           | -1.62           | 5.10         | 6.07           | -1.25           |

|       |       |       |       |      |       |       |       |       |
|-------|-------|-------|-------|------|-------|-------|-------|-------|
| 9.05  | 1.78  | 0.46  | 4.24  | 3.93 | -0.88 | 11.48 | 0.31  | 0.06  |
| 4.96  | 2.31  | -0.60 | 1.88  | 6.29 | -1.40 | 8.90  | 2.27  | -0.47 |
| 9.34  | 2.07  | 0.54  | 4.55  | 3.62 | -0.81 | 12.27 | 1.10  | 0.23  |
| 13.13 | 5.86  | 1.52  | 4.79  | 3.38 | -0.75 | 25.05 | 13.88 | 2.85  |
| 17.74 | 10.47 | 2.72  | 4.36  | 3.81 | -0.85 | 19.37 | 8.20  | 1.68  |
| 12.82 | 5.55  | 1.44  | 5.01  | 3.16 | -0.70 | 17.96 | 6.79  | 1.39  |
| 19.69 | 12.42 | 3.23  | 5.95  | 2.22 | -0.49 | 24.97 | 13.80 | 2.83  |
| 7.30  | 0.03  | 0.01  | 5.18  | 2.99 | -0.67 | 17.36 | 6.19  | 1.27  |
| 6.47  | 0.80  | -0.21 | 2.44  | 5.73 | -1.27 | 9.14  | 2.03  | -0.42 |
| 31.77 | 24.50 | 6.37  | 16.21 | 8.04 | 1.79  | 42.62 | 31.45 | 6.46  |
| 12.01 | 4.74  | 1.23  | 5.17  | 3.00 | -0.67 | 14.66 | 3.49  | 0.72  |
| 8.37  | 1.10  | 0.29  | 2.29  | 5.88 | -1.31 | 10.21 | 0.96  | -0.20 |
| 9.69  | 2.42  | 0.63  | 4.34  | 3.83 | -0.85 | 17.77 | 6.60  | 1.36  |
| 4.87  | 2.40  | -0.62 | 3.80  | 4.37 | -0.97 | 7.58  | 3.59  | -0.74 |
| 14.60 | 7.33  | 1.90  | 6.08  | 2.09 | -0.46 | 11.06 | 0.11  | -0.02 |
| 4.47  | 2.80  | -0.73 | 3.92  | 4.25 | -0.95 | 16.77 | 5.60  | 1.15  |
| 6.57  | 0.70  | -0.18 | 1.58  | 6.59 | -1.47 | 2.94  | 8.23  | -1.69 |
| 7.51  | 0.24  | 0.06  | 10.77 | 2.60 | 0.58  | 10.91 | 0.26  | -0.05 |
| 11.86 | 4.59  | 1.19  | 12.62 | 4.45 | 0.99  | 15.75 | 4.58  | 0.94  |
| 7.30  | 0.03  | 0.01  | 10.30 | 2.13 | 0.47  | 11.30 | 0.13  | 0.03  |
| 13.15 | 5.88  | 1.53  | 13.28 | 5.11 | 1.14  | 18.26 | 7.09  | 1.46  |
| 6.63  | 0.64  | -0.17 | 5.31  | 2.86 | -0.64 | 13.77 | 2.60  | 0.53  |
| 5.80  | 1.47  | -0.38 | 5.11  | 3.06 | -0.68 | 7.92  | 3.25  | -0.67 |
| 8.38  | 1.11  | 0.29  | 12.19 | 4.02 | 0.89  | 8.77  | 2.40  | -0.49 |
| 8.73  | 1.46  | 0.38  | 5.50  | 2.67 | -0.59 | 12.67 | 1.50  | 0.31  |
| 3.21  | 4.06  | -1.06 | 6.41  | 1.76 | -0.39 | 6.04  | 5.13  | -1.05 |
| 7.00  | 0.27  | -0.07 | 4.75  | 3.42 | -0.76 | 11.57 | 0.40  | 0.08  |
| 13.67 | 6.40  | 1.66  | 12.47 | 4.30 | 0.96  | 17.66 | 6.49  | 1.33  |
| 5.53  | 1.74  | -0.45 | 6.14  | 2.03 | -0.45 | 6.68  | 4.49  | -0.92 |
| 7.80  | 0.53  | 0.14  | 4.22  | 3.95 | -0.88 | 11.86 | 0.69  | 0.14  |
| 4.50  | 2.77  | -0.72 | 5.59  | 2.58 | -0.57 | 13.12 | 1.95  | 0.40  |
| 6.31  | 0.96  | -0.25 | 13.49 | 5.32 | 1.18  | 10.44 | 0.73  | -0.15 |
| 7.31  | 0.04  | 0.01  | 11.10 | 2.93 | 0.65  | 11.04 | 0.13  | -0.03 |
| 11.01 | 3.74  | 0.97  | 9.93  | 1.76 | 0.39  | 15.79 | 4.62  | 0.95  |
| 4.81  | 2.46  | -0.64 | 3.87  | 4.30 | -0.96 | 8.25  | 2.92  | -0.60 |
| 2.86  | 4.41  | -1.15 | 10.62 | 2.45 | 0.54  | 12.36 | 1.19  | 0.24  |
| 12.90 | 5.63  | 1.46  | 10.34 | 2.17 | 0.48  | 7.49  | 3.68  | -0.76 |
| 11.14 | 3.87  | 1.00  | 5.83  | 2.34 | -0.52 | 16.70 | 5.53  | 1.14  |
| 14.41 | 7.14  | 1.86  | 7.71  | 0.46 | -0.10 | 4.74  | 6.43  | -1.32 |
| 10.52 | 3.25  | 0.84  | 6.59  | 1.58 | -0.35 | 15.30 | 4.13  | 0.85  |
| 11.98 | 4.71  | 1.22  | 4.54  | 3.63 | -0.81 | 4.35  | 6.82  | -1.40 |
| 14.12 | 6.85  | 1.78  | 7.07  | 1.10 | -0.24 | 11.53 | 0.36  | 0.07  |
| 14.80 | 7.53  | 1.96  | 6.78  | 1.39 | -0.31 | 8.40  | 2.77  | -0.57 |
| 17.77 | 10.50 | 2.73  | 14.87 | 6.70 | 1.49  | 20.47 | 9.30  | 1.91  |
| 7.92  | 0.65  | 0.17  | 2.42  | 5.75 | -1.28 | 5.20  | 5.97  | -1.23 |
| 11.32 | 4.05  | 1.05  | 7.50  | 0.67 | -0.15 | 11.95 | 0.78  | 0.16  |
| 12.02 | 4.75  | 1.23  | 6.97  | 1.20 | -0.27 | 8.73  | 2.44  | -0.50 |

|       |              |             |       |      |       |       |              |             |
|-------|--------------|-------------|-------|------|-------|-------|--------------|-------------|
| 10.18 | 2.91         | 0.76        | 8.98  | 0.81 | 0.18  | 8.08  | 3.09         | -0.64       |
| 6.42  | 0.85         | -0.22       | 6.17  | 2.00 | -0.45 | 9.56  | 1.61         | -0.33       |
| 13.17 | 5.90         | 1.53        | 4.81  | 3.36 | -0.75 | 7.36  | 3.81         | -0.78       |
| 8.62  | 1.35         | 0.35        | 8.67  | 0.50 | 0.11  | 6.24  | 4.93         | -1.01       |
| 7.87  | 0.60         | 0.16        | 5.41  | 2.76 | -0.61 | 5.57  | 5.60         | -1.15       |
| 7.94  | 0.67         | 0.17        | 4.39  | 3.78 | -0.84 | 16.88 | 5.71         | 1.17        |
| 8.14  | 0.87         | 0.23        | 6.90  | 1.27 | -0.28 | 19.47 | 8.30         | 1.70        |
| 9.40  | 2.13         | 0.55        | 9.85  | 1.68 | 0.37  | 18.88 | 7.71         | 1.58        |
| 8.37  | 1.10         | 0.28        | 9.16  | 0.99 | 0.22  | 18.53 | 7.36         | 1.51        |
| 4.85  | 2.42         | -0.63       | 0.85  | 7.32 | -1.63 | 2.09  | 9.09         | -1.87       |
| 19.18 | <b>11.91</b> | <b>3.10</b> | 4.23  | 3.94 | -0.88 | 6.20  | 4.97         | -1.02       |
| 9.10  | 1.83         | 0.47        | 1.28  | 6.89 | -1.53 | 3.18  | 7.99         | -1.64       |
| 9.86  | 2.59         | 0.67        | 4.92  | 3.25 | -0.72 | 4.46  | 6.71         | -1.38       |
| 6.08  | 1.19         | -0.31       | 4.32  | 3.85 | -0.86 | 4.23  | 6.94         | -1.43       |
| 7.93  | 0.66         | 0.17        | 5.79  | 2.38 | -0.53 | 4.49  | 6.68         | -1.37       |
| 21.50 | <b>14.23</b> | <b>3.70</b> | 6.62  | 1.55 | -0.34 | 12.65 | 1.48         | 0.30        |
| 9.01  | 1.74         | 0.45        | 2.62  | 5.55 | -1.24 | 4.17  | 7.00         | -1.44       |
| 16.02 | <b>8.75</b>  | <b>2.27</b> | 5.22  | 2.95 | -0.66 | 8.13  | 3.04         | -0.62       |
| 9.98  | 2.71         | 0.70        | 4.24  | 3.93 | -0.88 | 3.98  | 7.19         | -1.48       |
| 4.20  | 3.07         | -0.80       | 3.69  | 4.48 | -1.00 | 3.33  | 7.84         | -1.61       |
| 14.36 | 7.09         | 1.84        | 7.94  | 0.23 | -0.05 | 14.15 | 2.98         | 0.61        |
| 6.52  | 0.75         | -0.19       | 6.47  | 1.70 | -0.38 | 4.83  | 6.34         | -1.30       |
| 10.23 | 2.96         | 0.77        | 3.53  | 4.64 | -1.03 | 8.36  | 2.81         | -0.58       |
| 17.64 | <b>10.37</b> | <b>2.69</b> | 10.73 | 2.56 | 0.57  | 7.81  | 3.36         | -0.69       |
| 6.63  | 0.64         | -0.17       | 4.98  | 3.19 | -0.71 | 4.74  | 6.43         | -1.32       |
| 13.55 | 6.28         | 1.63        | 13.98 | 5.81 | 1.29  | 12.00 | 0.83         | 0.17        |
| 12.56 | 5.29         | 1.37        | 10.00 | 1.83 | 0.41  | 18.69 | 7.52         | 1.55        |
| 10.65 | 3.38         | 0.88        | 9.20  | 1.03 | 0.23  | 6.13  | 5.04         | -1.04       |
| 6.16  | 1.11         | -0.29       | 6.40  | 1.77 | -0.39 | 5.90  | 5.27         | -1.08       |
| 2.02  | 5.25         | -1.37       | 5.66  | 2.51 | -0.56 | 9.12  | 2.05         | -0.42       |
| 5.65  | 1.62         | -0.42       | 11.38 | 3.21 | 0.71  | 16.42 | 5.25         | 1.08        |
| 3.32  | 3.95         | -1.03       | 3.16  | 5.01 | -1.11 | 7.21  | 3.96         | -0.82       |
| 3.33  | 3.94         | -1.03       | 4.41  | 3.76 | -0.84 | 9.87  | 1.30         | -0.27       |
| 6.98  | 0.29         | -0.08       | 4.35  | 3.82 | -0.85 | 8.48  | 2.69         | -0.55       |
| 4.92  | 2.35         | -0.61       | 3.12  | 5.05 | -1.12 | 5.59  | 5.58         | -1.15       |
| 3.00  | 4.27         | -1.11       | 2.80  | 5.37 | -1.20 | 9.48  | 1.69         | -0.35       |
| 4.35  | 2.92         | -0.76       | 4.69  | 3.48 | -0.77 | 10.09 | 1.08         | -0.22       |
| 2.48  | 4.79         | -1.25       | 2.46  | 5.71 | -1.27 | 4.87  | 6.30         | -1.29       |
| 2.47  | 4.80         | -1.25       | 8.38  | 0.21 | 0.05  | 3.73  | 7.44         | -1.53       |
| 2.89  | 4.38         | -1.14       | 3.48  | 4.69 | -1.04 | 23.70 | <b>12.53</b> | <b>2.57</b> |
| 12.83 | 5.56         | 1.45        | 14.79 | 6.62 | 1.47  | 30.96 | <b>19.79</b> | <b>4.07</b> |
| 4.83  | 2.44         | -0.64       | 9.84  | 1.67 | 0.37  | 18.01 | 6.84         | 1.41        |
| 3.90  | 3.37         | -0.88       | 3.57  | 4.60 | -1.02 | 10.04 | 1.13         | -0.23       |
| 3.30  | 3.97         | -1.03       | 2.15  | 6.02 | -1.34 | 15.38 | 4.21         | 0.86        |
| 4.79  | 2.48         | -0.65       | 10.09 | 1.92 | 0.43  | 19.40 | 8.23         | 1.69        |
| 6.19  | 1.08         | -0.28       | 12.46 | 4.29 | 0.96  | 14.82 | 3.65         | 0.75        |
| 5.22  | 2.05         | -0.53       | 8.62  | 0.45 | 0.10  | 14.78 | 3.61         | 0.74        |

|       |      |       |       |       |       |       |       |       |
|-------|------|-------|-------|-------|-------|-------|-------|-------|
| 13.38 | 6.11 | 1.59  | 7.07  | 1.10  | -0.24 | 39.70 | 28.53 | 5.86  |
| 3.79  | 3.48 | -0.91 | 12.97 | 4.80  | 1.07  | 13.11 | 1.94  | 0.40  |
| 3.84  | 3.43 | -0.89 | 14.41 | 6.24  | 1.39  | 6.29  | 4.88  | -1.00 |
| 6.40  | 0.87 | -0.23 | 5.75  | 2.42  | -0.54 | 5.93  | 5.24  | -1.08 |
| 6.57  | 0.70 | -0.18 | 18.42 | 10.25 | 2.28  | 21.40 | 10.23 | 2.10  |
| 2.60  | 4.67 | -1.21 | 9.97  | 1.80  | 0.40  | 2.63  | 8.54  | -1.75 |
| 6.80  | 0.47 | -0.12 | 10.69 | 2.52  | 0.56  | 11.57 | 0.40  | 0.08  |
| 2.80  | 4.47 | -1.16 | 16.33 | 8.16  | 1.82  | 10.87 | 0.30  | -0.06 |
| 2.01  | 5.26 | -1.37 | 8.42  | 0.25  | 0.06  | 3.50  | 7.67  | -1.58 |
| 4.32  | 2.95 | -0.77 | 12.85 | 4.68  | 1.04  | 11.50 | 0.33  | 0.07  |
| 7.26  | 0.01 | 0.00  | 12.41 | 4.24  | 0.94  | 14.11 | 2.94  | 0.60  |
| 5.77  | 1.50 | -0.39 | 11.71 | 3.54  | 0.79  | 13.50 | 2.33  | 0.48  |
| 3.49  | 3.78 | -0.98 | 12.62 | 4.45  | 0.99  | 7.71  | 3.46  | -0.71 |
| 2.10  | 5.17 | -1.35 | 12.88 | 4.71  | 1.05  | 15.44 | 4.27  | 0.88  |
| 2.58  | 4.69 | -1.22 | 13.45 | 5.28  | 1.17  | 9.71  | 1.46  | -0.30 |
| 1.70  | 5.57 | -1.45 | 8.63  | 0.46  | 0.10  | 9.79  | 1.38  | -0.28 |
| 3.70  | 3.57 | -0.93 | 14.15 | 5.98  | 1.33  | 16.51 | 5.34  | 1.10  |
| 4.14  | 3.13 | -0.82 | 18.47 | 10.30 | 2.29  | 12.02 | 0.85  | 0.17  |
| 1.79  | 5.48 | -1.43 | 9.08  | 0.90  | 0.20  | 13.18 | 2.01  | 0.41  |
| 2.68  | 4.59 | -1.19 | 15.10 | 6.93  | 1.54  | 10.94 | 0.23  | -0.05 |
| 2.20  | 5.07 | -1.32 | 11.79 | 3.62  | 0.81  | 11.34 | 0.17  | 0.03  |
| 4.05  | 3.22 | -0.84 | 13.45 | 5.28  | 1.17  | 13.68 | 2.51  | 0.51  |
| 12.02 | 4.75 | 1.23  | 6.71  | 1.46  | -0.32 | 10.25 | 0.93  | -0.19 |
| 15.12 | 7.85 | 2.04  | 8.12  | 0.05  | -0.01 | 12.28 | 1.11  | 0.23  |
| 12.44 | 5.17 | 1.34  | 9.17  | 1.00  | 0.22  | 10.96 | 0.21  | -0.04 |
| 6.99  | 0.28 | -0.07 | 16.16 | 7.99  | 1.78  | 18.86 | 7.69  | 1.58  |
| 8.60  | 1.33 | 0.35  | 9.39  | 1.22  | 0.27  | 11.24 | 0.07  | 0.01  |
| 4.96  | 2.31 | -0.60 | 8.80  | 0.63  | 0.14  | 12.96 | 1.79  | 0.37  |
| 3.19  | 4.08 | -1.06 | 4.83  | 3.34  | -0.74 | 3.71  | 7.46  | -1.53 |
| 4.54  | 2.73 | -0.71 | 4.58  | 3.59  | -0.80 | 8.66  | 2.51  | -0.52 |
| 5.15  | 2.12 | -0.55 | 12.74 | 4.57  | 1.02  | 11.14 | 0.03  | -0.01 |
| 9.01  | 1.74 | 0.45  | 11.64 | 3.47  | 0.77  | 15.46 | 4.29  | 0.88  |
| 4.02  | 3.25 | -0.84 | 11.02 | 2.85  | 0.63  | 11.07 | 0.10  | -0.02 |
| 10.24 | 2.97 | 0.77  | 9.73  | 1.56  | 0.35  | 11.77 | 0.60  | 0.12  |
| 13.07 | 5.80 | 1.51  | 9.75  | 1.58  | 0.35  | 14.34 | 3.17  | 0.65  |
| 9.30  | 2.03 | 0.53  | 8.28  | 0.11  | 0.02  | 16.40 | 5.23  | 1.07  |
| 6.25  | 1.02 | -0.27 | 7.37  | 0.81  | -0.18 | 18.39 | 7.22  | 1.48  |
| 12.80 | 5.53 | 1.44  | 8.66  | 0.49  | 0.11  | 20.71 | 9.54  | 1.96  |
| 15.95 | 8.68 | 2.26  | 9.07  | 0.90  | 0.20  | 12.61 | 1.44  | 0.30  |
| 9.20  | 1.93 | 0.50  | 4.97  | 3.20  | -0.71 | 13.99 | 2.82  | 0.58  |
| 15.37 | 8.10 | 2.11  | 5.36  | 2.81  | -0.62 | 23.69 | 12.52 | 2.57  |
| 14.44 | 7.17 | 1.86  | 10.93 | 2.76  | 0.61  | 25.33 | 14.16 | 2.91  |
| 2.95  | 4.32 | -1.12 | 8.87  | 0.70  | 0.16  | 9.20  | 1.97  | -0.40 |
| 6.46  | 0.81 | -0.21 | 11.28 | 3.11  | 0.69  | 14.44 | 3.27  | 0.67  |
| 5.96  | 1.31 | -0.34 | 7.81  | 0.36  | -0.08 | 12.95 | 1.78  | 0.37  |
| 9.54  | 2.27 | 0.59  | 10.07 | 1.90  | 0.42  | 15.37 | 4.20  | 0.86  |
| 7.76  | 0.49 | 0.13  | 12.21 | 4.04  | 0.90  | 17.26 | 6.09  | 1.25  |



|       |      |       |       |       |       |       |       |       |
|-------|------|-------|-------|-------|-------|-------|-------|-------|
| 7.76  | 0.49 | 0.13  | 15.01 | 6.84  | 1.52  | 21.28 | 10.11 | 2.08  |
| 11.30 | 4.03 | 1.05  | 6.10  | 2.07  | -0.46 | 10.04 | 1.13  | -0.23 |
| 6.85  | 0.42 | -0.11 | 6.73  | 1.44  | -0.32 | 10.80 | 0.37  | -0.08 |
| 9.67  | 2.40 | 0.62  | 8.85  | 0.68  | 0.15  | 21.71 | 10.54 | 2.16  |
| 8.78  | 1.51 | 0.39  | 5.59  | 2.58  | -0.57 | 11.64 | 0.47  | 0.10  |
| 7.03  | 0.24 | -0.06 | 7.66  | 0.51  | -0.11 | 9.74  | 1.43  | -0.30 |
| 8.37  | 1.10 | 0.29  | 5.77  | 2.40  | -0.53 | 20.83 | 9.66  | 1.98  |
| 13.69 | 6.42 | 1.67  | 14.69 | 6.52  | 1.45  | 26.03 | 14.86 | 3.05  |
| 3.55  | 3.72 | -0.97 | 5.86  | 2.31  | -0.51 | 11.96 | 0.79  | 0.16  |
| 3.60  | 3.67 | -0.95 | 5.87  | 2.30  | -0.51 | 9.83  | 1.34  | -0.28 |
| 6.98  | 0.29 | -0.08 | 7.77  | 0.40  | -0.09 | 17.24 | 6.07  | 1.25  |
| 3.17  | 4.10 | -1.07 | 3.79  | 4.38  | -0.98 | 16.75 | 5.58  | 1.14  |
| 2.50  | 4.77 | -1.24 | 5.82  | 2.35  | -0.52 | 10.90 | 0.27  | -0.06 |
| 5.19  | 2.08 | -0.54 | 3.33  | 4.84  | -1.08 | 12.46 | 1.29  | 0.26  |
| 10.07 | 2.80 | 0.73  | 7.89  | 0.28  | -0.06 | 13.02 | 1.85  | 0.38  |
| 10.60 | 3.33 | 0.87  | 4.89  | 3.28  | -0.73 | 15.29 | 4.12  | 0.85  |
| 12.34 | 5.07 | 1.32  | 13.91 | 5.74  | 1.28  | 24.11 | 12.94 | 2.66  |
| 3.98  | 3.29 | -0.86 | 8.69  | 0.52  | 0.12  | 14.06 | 2.89  | 0.59  |
| 11.25 | 3.98 | 1.03  | 7.44  | 0.73  | -0.16 | 14.24 | 3.07  | 0.63  |
| 7.23  | 0.04 | -0.01 | 8.30  | 0.13  | 0.03  | 14.29 | 3.12  | 0.64  |
| 6.58  | 0.69 | -0.18 | 10.32 | 2.15  | 0.48  | 12.30 | 1.13  | 0.23  |
| 5.06  | 2.21 | -0.58 | 5.63  | 2.54  | -0.56 | 5.75  | 5.42  | -1.11 |
| 8.41  | 1.14 | 0.29  | 6.54  | 1.63  | -0.36 | 11.62 | 0.45  | 0.09  |
| 7.46  | 0.19 | 0.05  | 11.45 | 3.28  | 0.73  | 8.78  | 2.39  | -0.49 |
| 10.68 | 3.41 | 0.88  | 11.42 | 3.25  | 0.72  | 11.60 | 0.43  | 0.09  |
| 4.94  | 2.33 | -0.61 | 17.20 | 9.03  | 2.01  | 18.47 | 7.30  | 1.50  |
| 5.07  | 2.20 | -0.57 | 17.30 | 9.13  | 2.03  | 14.82 | 3.65  | 0.75  |
| 5.06  | 2.21 | -0.58 | 10.77 | 2.60  | 0.58  | 8.70  | 2.47  | -0.51 |
| 6.43  | 0.84 | -0.22 | 10.02 | 1.85  | 0.41  | 11.71 | 0.54  | 0.11  |
| 9.63  | 2.36 | 0.61  | 18.45 | 10.28 | 2.29  | 8.20  | 2.97  | -0.61 |
| 5.50  | 1.77 | -0.46 | 10.85 | 2.68  | 0.60  | 10.27 | 0.90  | -0.18 |
| 15.20 | 7.93 | 2.06  | 18.40 | 10.23 | 2.28  | 11.20 | 0.03  | 0.01  |
| 4.30  | 2.97 | -0.77 | 10.25 | 2.08  | 0.46  | 7.35  | 3.82  | -0.79 |
| 6.74  | 0.53 | -0.14 | 34.18 | 26.01 | 5.79  | 7.17  | 4.00  | -0.82 |
| 3.20  | 4.07 | -1.06 | 8.03  | 0.14  | -0.03 | 2.85  | 8.32  | -1.71 |
| 12.41 | 5.14 | 1.33  | 4.67  | 3.50  | -0.78 | 13.57 | 2.40  | 0.49  |
| 6.56  | 0.71 | -0.18 | 5.45  | 2.72  | -0.61 | 9.80  | 1.37  | -0.28 |
| 7.33  | 0.06 | 0.01  | 8.58  | 0.41  | 0.09  | 17.32 | 6.15  | 1.26  |
| 8.37  | 1.10 | 0.28  | 9.38  | 1.21  | 0.27  | 16.55 | 5.38  | 1.10  |
| 9.88  | 2.61 | 0.68  | 10.33 | 2.16  | 0.48  | 20.35 | 9.18  | 1.89  |
| 6.90  | 0.37 | -0.10 | 6.22  | 1.95  | -0.43 | 20.00 | 8.83  | 1.81  |
| 9.03  | 1.76 | 0.46  | 7.03  | 1.14  | -0.25 | 11.73 | 0.56  | 0.11  |
| 3.71  | 3.56 | -0.93 | 2.38  | 5.79  | -1.29 | 11.80 | 0.63  | 0.13  |
| 6.40  | 0.87 | -0.23 | 8.23  | 0.06  | 0.01  | 18.77 | 7.60  | 1.56  |
| 7.61  | 0.34 | 0.09  | 8.73  | 0.56  | 0.12  | 17.81 | 6.64  | 1.36  |
| 4.41  | 2.86 | -0.75 | 8.75  | 0.58  | 0.13  | 15.83 | 4.66  | 0.96  |
| 4.42  | 2.85 | -0.74 | 8.72  | 0.55  | 0.12  | 17.91 | 6.74  | 1.38  |

|       |      |       |       |       |       |       |       |       |
|-------|------|-------|-------|-------|-------|-------|-------|-------|
| 2.61  | 4.67 | -1.21 | 5.25  | 2.92  | -0.65 | 8.92  | 2.25  | -0.46 |
| 11.03 | 3.76 | 0.98  | 18.99 | 10.82 | 2.41  | 28.39 | 17.22 | 3.54  |
| 2.47  | 4.80 | -1.25 | 9.41  | 1.24  | 0.28  | 7.57  | 3.60  | -0.74 |
| 2.16  | 5.11 | -1.33 | 10.14 | 1.97  | 0.44  | 18.01 | 6.84  | 1.40  |
| 5.38  | 1.89 | -0.49 | 11.10 | 2.93  | 0.65  | 15.02 | 3.85  | 0.79  |
| 4.29  | 2.98 | -0.78 | 8.48  | 0.31  | 0.07  | 20.48 | 9.31  | 1.91  |
| 6.38  | 0.89 | -0.23 | 17.31 | 9.14  | 2.03  | 19.64 | 8.47  | 1.74  |
| 4.11  | 3.16 | -0.82 | 6.09  | 2.08  | -0.46 | 12.03 | 0.86  | 0.18  |
| 5.08  | 2.19 | -0.57 | 7.41  | 0.76  | -0.17 | 8.50  | 2.67  | -0.55 |
| 1.95  | 5.32 | -1.38 | 9.26  | 1.09  | 0.24  | 9.01  | 2.16  | -0.44 |
| 3.06  | 4.21 | -1.10 | 6.10  | 2.07  | -0.46 | 6.13  | 5.04  | -1.04 |
| 6.50  | 0.77 | -0.20 | 13.22 | 5.05  | 1.12  | 12.08 | 0.91  | 0.19  |
| 4.97  | 2.30 | -0.60 | 6.82  | 1.35  | -0.30 | 13.00 | 1.83  | 0.38  |
| 6.23  | 1.04 | -0.27 | 3.68  | 4.49  | -1.00 | 5.60  | 5.57  | -1.15 |
| 2.61  | 4.66 | -1.21 | 6.75  | 1.42  | -0.32 | 7.02  | 4.15  | -0.85 |
| 2.53  | 4.74 | -1.23 | 20.43 | 12.26 | 2.73  | 13.48 | 2.31  | 0.47  |
| 3.52  | 3.75 | -0.98 | 6.90  | 1.27  | -0.28 | 5.80  | 5.37  | -1.10 |
| 6.68  | 0.59 | -0.16 | 17.38 | 9.21  | 2.05  | 13.89 | 2.72  | 0.56  |
| 5.56  | 1.71 | -0.45 | 9.25  | 1.08  | 0.24  | 7.25  | 3.92  | -0.81 |
| 2.66  | 4.61 | -1.20 | 9.66  | 1.49  | 0.33  | 8.99  | 2.18  | -0.45 |
| 4.78  | 2.49 | -0.65 | 26.40 | 18.23 | 4.06  | 12.35 | 1.18  | 0.24  |
| 5.84  | 1.43 | -0.37 | 5.96  | 2.21  | -0.49 | 10.03 | 1.14  | -0.23 |
| 3.42  | 3.85 | -1.00 | 7.07  | 1.10  | -0.24 | 7.86  | 3.31  | -0.68 |
| 4.83  | 2.44 | -0.63 | 3.81  | 4.36  | -0.97 | 6.28  | 4.89  | -1.01 |
| 4.35  | 2.92 | -0.76 | 11.62 | 3.45  | 0.77  | 16.66 | 5.49  | 1.13  |
| 5.26  | 2.01 | -0.52 | 6.98  | 1.19  | -0.26 | 10.86 | 0.31  | -0.07 |
| 6.55  | 0.72 | -0.19 | 8.89  | 0.72  | 0.16  | 13.78 | 2.61  | 0.54  |
| 7.52  | 0.25 | 0.07  | 5.64  | 2.53  | -0.56 | 12.99 | 1.82  | 0.37  |
| 8.70  | 1.43 | 0.37  | 1.07  | 7.10  | -1.58 | 7.24  | 3.93  | -0.81 |
| 4.03  | 3.24 | -0.84 | 3.79  | 4.38  | -0.97 | 6.84  | 4.33  | -0.89 |
| 7.68  | 0.41 | 0.11  | 6.03  | 2.14  | -0.48 | 7.76  | 3.41  | -0.70 |
| 3.60  | 3.67 | -0.96 | 2.01  | 6.16  | -1.37 | 9.41  | 1.76  | -0.36 |
| 7.81  | 0.54 | 0.14  | 1.49  | 6.68  | -1.49 | 7.69  | 3.48  | -0.72 |
| 7.98  | 0.71 | 0.18  | 3.96  | 4.21  | -0.94 | 11.90 | 0.73  | 0.15  |
| 7.28  | 0.01 | 0.00  | 3.79  | 4.38  | -0.98 | 10.01 | 1.16  | -0.24 |
| 13.03 | 5.76 | 1.50  | 16.94 | 8.77  | 1.95  | 17.30 | 6.13  | 1.26  |
| 13.21 | 5.94 | 1.54  | 5.88  | 2.29  | -0.51 | 17.63 | 6.46  | 1.33  |
| 8.91  | 1.64 | 0.43  | 5.48  | 2.69  | -0.60 | 14.28 | 3.11  | 0.64  |
| 13.23 | 5.96 | 1.55  | 12.18 | 4.01  | 0.89  | 17.73 | 6.56  | 1.35  |
| 6.23  | 1.04 | -0.27 | 3.61  | 4.56  | -1.01 | 8.48  | 2.69  | -0.55 |
| 3.51  | 3.76 | -0.98 | 3.11  | 5.06  | -1.13 | 6.89  | 4.28  | -0.88 |
| 14.74 | 7.47 | 1.94  | 12.81 | 4.64  | 1.03  | 20.05 | 8.88  | 1.82  |
| 8.73  | 1.46 | 0.38  | 6.50  | 1.67  | -0.37 | 8.36  | 2.81  | -0.58 |
| 10.07 | 2.80 | 0.73  | 4.56  | 3.61  | -0.80 | 12.95 | 1.78  | 0.37  |
| 8.56  | 1.29 | 0.33  | 6.50  | 1.67  | -0.37 | 11.20 | 0.03  | 0.01  |
| 9.94  | 2.67 | 0.69  | 7.09  | 1.08  | -0.24 | 11.82 | 0.65  | 0.13  |
| 6.72  | 0.55 | -0.14 | 3.94  | 4.23  | -0.94 | 10.96 | 0.21  | -0.04 |

|              |              |              |              |              |             |              |              |             |
|--------------|--------------|--------------|--------------|--------------|-------------|--------------|--------------|-------------|
| 7.39         | 0.12         | 0.03         | 7.95         | 0.22         | -0.05       | 10.96        | 0.21         | -0.04       |
| 71.23        | <b>63.96</b> | <b>16.63</b> | 6.89         | 1.28         | -0.29       | 4.26         | 6.91         | -1.42       |
| 13.11        | 5.84         | 1.52         | 8.68         | 0.51         | 0.11        | 10.55        | 0.62         | -0.13       |
| <b>39.99</b> | <b>32.72</b> | <b>8.51</b>  | <b>30.78</b> | <b>22.61</b> | <b>5.03</b> | <b>27.61</b> | <b>16.44</b> | <b>3.38</b> |
| 10.32        | 3.05         | 0.79         | 5.79         | 2.38         | -0.53       | 13.49        | 2.32         | 0.48        |
| 5.24         | 2.03         | -0.53        | 7.79         | 0.38         | -0.08       | 9.76         | 1.41         | -0.29       |
| 3.74         | 3.53         | -0.92        | 8.22         | 0.05         | 0.01        | 13.49        | 2.32         | 0.48        |
| 13.01        | 5.74         | 1.49         | 13.47        | 5.30         | 1.18        | 8.59         | 2.58         | -0.53       |
| 9.86         | 2.59         | 0.67         | 10.29        | 2.12         | 0.47        | 8.15         | 3.02         | -0.62       |
| 6.42         | 0.85         | -0.22        | 3.25         | 4.92         | -1.10       | 5.94         | 5.23         | -1.08       |
| 9.64         | 2.37         | 0.62         | 14.29        | 6.12         | 1.36        | 15.26        | 4.09         | 0.84        |
| 15.68        | <b>8.41</b>  | <b>2.19</b>  | 10.48        | 2.31         | 0.51        | 19.03        | 7.86         | 1.62        |
| 8.76         | 1.49         | 0.39         | 12.91        | 4.74         | 1.06        | 10.71        | 0.46         | -0.09       |
| 4.79         | 2.48         | -0.64        | 2.40         | 5.77         | -1.28       | 3.28         | 7.89         | -1.62       |
| 7.33         | 0.06         | 0.02         | 4.52         | 3.65         | -0.81       | 13.48        | 2.31         | 0.47        |
| 6.96         | 0.31         | -0.08        | 6.08         | 2.09         | -0.47       | 9.60         | 1.57         | -0.32       |
| 9.96         | 2.69         | 0.70         | 4.49         | 3.68         | -0.82       | 12.60        | 1.43         | 0.29        |
| 8.57         | 1.30         | 0.34         | 3.53         | 4.64         | -1.03       | 16.10        | 4.93         | 1.01        |
| 4.91         | 2.36         | -0.61        | 7.23         | 0.94         | -0.21       | 9.61         | 1.56         | -0.32       |
| 6.93         | 0.34         | -0.09        | 5.67         | 2.50         | -0.56       | 14.21        | 3.04         | 0.62        |
| 7.97         | 0.70         | 0.18         | 4.20         | 3.97         | -0.88       | 9.06         | 2.11         | -0.43       |
| 15.90        | <b>8.63</b>  | <b>2.24</b>  | 8.71         | 0.54         | 0.12        | 12.34        | 1.17         | 0.24        |
| 11.43        | 4.16         | 1.08         | 12.86        | 4.69         | 1.04        | 11.46        | 0.29         | 0.06        |
| 8.69         | 1.42         | 0.37         | 12.39        | 4.22         | 0.94        | 14.17        | 3.00         | 0.62        |
| 10.69        | 3.42         | 0.89         | 11.18        | 3.01         | 0.67        | 8.10         | 3.07         | -0.63       |
| 4.42         | 2.85         | -0.74        | 7.56         | 0.61         | -0.14       | 4.40         | 6.77         | -1.39       |
| 9.62         | 2.35         | 0.61         | 10.79        | 2.62         | 0.58        | 9.59         | 1.58         | -0.33       |
| 5.26         | 2.01         | -0.52        | 16.91        | 8.74         | 1.95        | 6.77         | 4.40         | -0.90       |
| 14.22        | 6.95         | 1.80         | 26.19        | <b>18.02</b> | <b>4.01</b> | 12.59        | 1.42         | 0.29        |
| 8.43         | 1.16         | 0.30         | 20.88        | <b>12.71</b> | <b>2.83</b> | 3.84         | 7.33         | -1.51       |
| 18.38        | <b>11.11</b> | <b>2.89</b>  | 14.31        | 6.14         | 1.37        | 2.53         | 8.64         | -1.77       |
| 8.34         | 1.07         | 0.28         | 8.78         | 0.61         | 0.14        | 4.70         | 6.47         | -1.33       |
| 6.65         | 0.62         | -0.16        | 13.54        | 5.37         | 1.19        | 5.32         | 5.85         | -1.20       |
| 6.70         | 0.57         | -0.15        | 13.85        | 5.68         | 1.26        | 5.91         | 5.26         | -1.08       |
| 5.11         | 2.16         | -0.56        | 11.80        | 3.63         | 0.81        | 3.77         | 7.40         | -1.52       |
| 10.45        | 3.18         | 0.83         | 13.32        | 5.15         | 1.15        | 10.46        | 0.71         | -0.15       |
| 3.48         | 3.79         | -0.99        | 8.48         | 0.31         | 0.07        | 6.07         | 5.10         | -1.05       |
| 7.88         | 0.61         | 0.16         | 15.30        | 7.13         | 1.59        | 10.82        | 0.35         | -0.07       |
| 5.52         | 1.75         | -0.45        | 14.81        | 6.64         | 1.48        | 14.16        | 2.99         | 0.61        |
| 4.04         | 3.23         | -0.84        | 5.40         | 2.77         | -0.62       | 7.11         | 4.06         | -0.83       |
| 3.55         | 3.72         | -0.97        | 6.83         | 1.34         | -0.30       | 2.30         | 8.87         | -1.82       |
| 7.27         | 2.60         |              | 8.17         | 3.04         |             | 11.17        | 3.29         |             |
|              | 7.80         |              |              | 9.11         |             |              | 9.87         |             |
|              | 3.85         |              |              | 4.49         |             |              | 4.87         |             |
| 35.47        |              | 29.41        |              | 64.23        |             |              |              |             |
| 30.44        |              | 54.02        |              | 57.27        |             |              |              |             |
| 50.43        |              | 51.16        |              | 50.11        |             |              |              |             |

|       |       |       |
|-------|-------|-------|
| 32.79 | 48.63 | 42.30 |
| 37.28 | 45.80 | 53.48 |
| 9.01  | 11.15 | 9.42  |
| 7.19  | 7.37  | 17.57 |
| 1.99  | 9.54  | 9.31  |
| 7.23  | 5.19  | 17.19 |
| 2.73  | 4.34  | 16.54 |
| 4.78  | 6.61  | 15.15 |
| 2.82  | 2.33  | 3.92  |
| 27.02 | 33.44 | 28.26 |
| 8.45  | 7.00  | 11.76 |
| 35.47 | 40.44 | 40.02 |
| 32.50 | 39.19 | 38.33 |
| 1.09  | 1.03  | 1.04  |
| -0.09 | -0.03 | -0.04 |

x toxic a,b,c

y

x toxic a,b,c

x      toxic a,b,c

y



y

x      toxic a,b



x toxic a,b,c

y

y

|                     |                             |                      | <u>% inf</u> | <u>abs dev</u> | <u>robust Z</u> |
|---------------------|-----------------------------|----------------------|--------------|----------------|-----------------|
| 50002.00 A02        | M-004866- NIMA (nevr        | 284086.00 NEK8       | 8.88         | 0.54           | -0.12           |
| 50002.00 A04        | M-003795- NIMA (nevr        | 140609.00 NEK7       | 15.54        | 6.12           | 1.33            |
| 50002.00 A05        | M-004811- intestinal c      | 22858.00 ICK         | 10.40        | 0.98           | 0.21            |
| 50002.00 A06        | M-004166- NIMA (nevr        | 10783.00 NEK6        | 9.27         | 0.15           | -0.03           |
| 50002.00 A07        | M-003012- insulin-like      | 3480.00 IGF1R        | 9.70         | 0.28           | 0.06            |
| 50002.00 A08        | M-003519- NIMA (nevr        | 6787.00 NEK4         | 8.88         | 0.54           | -0.12           |
| 50002.00 A09        | M-006737- inositol he>      | 9807.00 IHPK1        | 10.81        | 1.39           | 0.30            |
| 50002.00 A10        | M-004867- NIMA (nevr        | 4752.00 NEK3         | 9.53         | 0.11           | 0.02            |
| 50002.00 A11        | M-006738- inositol he>      | 51447.00 IHPK2       | 6.69         | 2.73           | -0.59           |
| 50002.00 A12        | M-004090- NIMA (nevr        | 4751.00 NEK2         | 11.60        | 2.18           | 0.47            |
| 50002.00 A13        | M-006739- inositol he>      | 117283.00 IHPK3      | 12.91        | 3.49           | 0.76            |
| 50002.00 A14        | M-004865- NIMA (nevr        | 79858.00 NEK11       | 15.86        | 6.44           | 1.40            |
| 50002.00 A15        | M-009371- inhibitor of      | 8518.00 IKBKAP       | 12.31        | 2.89           | 0.63            |
| 50002.00 A16        | M-004864- NIMA (nevr        | 4750.00 NEK1         | 8.99         | 0.43           | -0.09           |
| 50002.00 A17        | M-003503- inhibitor of      | 3551.00 IKBKB        | 13.71        | 4.29           | 0.93            |
| 50002.00 A18        | M-006751- Coenzyme          | 80347.00 COASY       | 15.52        | 6.10           | 1.32            |
| 50002.00 A19        | M-003723- inhibitor of      | 9641.00 IKBKE        | 17.45        | 8.03           | 1.74            |
| <b>50002.00 A20</b> | <b>M-015419- neurobeacl</b> | <b>26960.00 NBEA</b> | <b>23.28</b> | <b>13.86</b>   | <b>3.01</b>     |
| 50002.00 A21        | M-007967- interleukin       | 3558.00 IL2          | 12.90        | 3.48           | 0.76            |
| 50002.00 A23        | M-004499- integrin-lin      | 3611.00 ILK          | 9.10         | 0.32           | -0.07           |
| 50002.00 B02        | M-024516- Ras proteir       | 5924.00 RASGRF2      | 2.33         | 7.09           | -1.54           |
| 50002.00 B04        | M-004838- renal tumo        | 5891.00 RAGE         | 7.41         | 2.01           | -0.44           |
| 50002.00 B05        | M-004869- NIMA (nevr        | 91754.00 NEK9        | 7.66         | 1.76           | -0.38           |
| 50002.00 B06        | M-003601- v-raf-1 mur       | 5894.00 RAF1         | 9.68         | 0.26           | 0.06            |
| 50002.00 B07        | M-004763- nemo-like l       | 51701.00 NLK         | 7.24         | 2.18           | -0.47           |
| 50002.00 B08        | M-003560- ras-related       | 5879.00 RAC1         | 4.94         | 4.48           | -0.97           |
| 50002.00 B09        | M-006821- non-metas         | 4830.00 NME1         | 12.55        | 3.13           | 0.68            |
| 50002.00 B10        | M-006785- aldehyde d        | 5832.00 ALDH18A1     | 9.98         | 0.56           | 0.12            |
| 50002.00 B11        | M-005102- non-metas         | 4831.00 NME2         | 13.81        | 4.39           | 0.95            |
| 50002.00 B12        | M-005367- PX domain         | 54899.00 PXX         | 9.84         | 0.42           | 0.09            |
| 50002.00 B13        | M-006753- non-metas         | 4832.00 NME3         | 10.19        | 0.77           | 0.17            |
| 50002.00 B14        | M-008072- protein tyri      | 11122.00 PTPRT       | 6.41         | 3.01           | -0.65           |
| 50002.00 B15        | M-006494- non-metas         | 4833.00 NME4         | 11.14        | 1.72           | 0.37            |
| 50002.00 B16        | M-004017- protein tyri      | 5801.00 PTPRR        | 15.38        | 5.96           | 1.29            |
| 50002.00 B17        | M-006754- non-metas         | 8382.00 NME5         | 12.42        | 3.00           | 0.65            |
| 50002.00 B18        | M-008476- protein tyri      | 5795.00 PTPRJ        | 19.11        | 9.69           | 2.10            |
| 50002.00 B19        | M-006755- non-metas         | 10201.00 NME6        | 9.44         | 0.02           | 0.00            |
| 50002.00 B20        | M-008069- protein tyri      | 5793.00 PTPRG        | 13.35        | 3.93           | 0.85            |
| 50002.00 B21        | M-006756- non-metas         | 29922.00 NME7        | 13.77        | 4.35           | 0.95            |
| 50002.00 B23        | M-005354- natriuretic       | 4881.00 NPR1         | 6.47         | 2.95           | -0.64           |
| 50002.00 C02        | M-006750- N-acetylglu       | 55577.00 NAGK        | 6.62         | 2.80           | -0.61           |
| 50002.00 C04        | M-004863- myosin IIIB       | 140469.00 MYO3B      | 11.24        | 1.82           | 0.39            |
| 50002.00 C05        | M-010260- integrin-lin      | 80895.00 ILKAP       | 11.13        | 1.71           | 0.37            |
| 50002.00 C06        | M-004862- myosin IIIA       | 53904.00 MYO3A       | 6.91         | 2.51           | -0.55           |
| 50002.00 C07        | M-006740- inositol pol      | 253430.00 IPMK       | 5.07         | 4.35           | -0.95           |
| 50002.00 C08        | M-005352- myosin ligh       | 85366.00 MYLK2       | 8.53         | 0.89           | -0.19           |

|              |                         |                    |       |       |       |
|--------------|-------------------------|--------------------|-------|-------|-------|
| 50002.00 C09 | M-003014- insulin rece  | 3643.00 INSR       | 4.26  | 5.16  | -1.12 |
| 50002.00 C10 | M-005351- myosin, ligl  | 4638.00 MYLK       | 12.07 | 2.65  | 0.58  |
| 50002.00 C11 | M-005332- insulin rece  | 3645.00 INSR       | 10.04 | 0.62  | 0.13  |
| 50002.00 C12 | M-006749- mevalonat     | 4598.00 MVK        | 10.37 | 0.95  | 0.21  |
| 50002.00 C13 | M-004760- interleukin   | 3654.00 IRAK1      | 10.49 | 1.07  | 0.23  |
| 50002.00 C14 | M-006748- mevalonat     | 4597.00 MVD        | 6.84  | 2.58  | -0.56 |
| 50002.00 C15 | M-004761- interleukin   | 3656.00 IRAK2      | 19.66 | 10.24 | 2.22  |
| 50002.00 C16 | M-003158- muscle, ske   | 4593.00 MUSK       | 13.73 | 4.31  | 0.94  |
| 50002.00 C17 | M-004762- interleukin   | 11213.00 IRAK3     | 9.95  | 0.53  | 0.12  |
| 50002.00 C18 | M-003753- serine/thre   | 51765.00 RP6-213H1 | 13.75 | 4.33  | 0.94  |
| 50002.00 C19 | M-003015- insulin rece  | 3667.00 IRS1       | 6.87  | 2.55  | -0.56 |
| 50002.00 C20 | M-003157- macrophag     | 4486.00 MST1R      | 15.01 | 5.59  | 1.21  |
| 50002.00 C21 | M-003144- IL2-inducib   | 3702.00 ITK        | 12.91 | 3.49  | 0.76  |
| 50002.00 C23 | M-006741- inositol 1,3  | 3705.00 ITPK1      | 12.50 | 3.08  | 0.67  |
| 50002.00 D02 | M-003600- protein tyr   | 84867.00 PTPN5     | 1.99  | 7.43  | -1.61 |
| 50002.00 D04 | M-003169- twinfilin, ac | 11344.00 TWF2      | 5.91  | 3.51  | -0.76 |
| 50002.00 D05 | M-005355- natriuretic   | 4882.00 NPR2       | 7.56  | 1.86  | -0.40 |
| 50002.00 D06 | M-003168- twinfilin, ac | 5756.00 TWF1       | 9.42  | 0.00  | 0.00  |
| 50002.00 D07 | M-005356- nuclear rec   | 29959.00 NRBP1     | 6.90  | 2.52  | -0.55 |
| 50002.00 D08 | M-003167- PTK7 prote    | 5754.00 PTK7       | 8.99  | 0.43  | -0.09 |
| 50002.00 D09 | M-026286- neuregulin    | 10718.00 NRG3      | 10.52 | 1.10  | 0.24  |
| 50002.00 D10 | M-003166- PTK6 prote    | 5753.00 PTK6       | 18.81 | 9.39  | 2.04  |
| 50002.00 D11 | M-003159- neurotroph    | 4914.00 NTRK1      | 15.59 | 6.17  | 1.34  |
| 50002.00 D12 | M-003165- PTK2B prot    | 2185.00 PTK2B      | 6.13  | 3.29  | -0.71 |
| 50002.00 D13 | M-003160- neurotroph    | 4915.00 NTRK2      | 10.07 | 0.65  | 0.14  |
| 50002.00 D14 | M-003164- PTK2 prote    | 5747.00 PTK2       | 10.22 | 0.80  | 0.17  |
| 50002.00 D15 | M-003161- neurotroph    | 4916.00 NTRK3      | 21.93 | 12.51 | 2.72  |
| 50002.00 D16 | M-005366- protein ser   | 85481.00 PSKH2     | 9.49  | 0.07  | 0.02  |
| 50002.00 D17 | M-007733- tumor prot    | 89882.00 TPD52L3   | 20.61 | 11.19 | 2.43  |
| 50002.00 D18 | M-005365- protein ser   | 5681.00 PSKH1      | 13.97 | 4.55  | 0.99  |
| 50002.00 D19 | M-004870- oxidative-s   | 9943.00 OXSR1      | 23.13 | 13.71 | 2.98  |
| 50002.00 D20 | M-004171- TAO kinase    | 9344.00 TAOK2      | 11.70 | 2.28  | 0.50  |
| 50002.00 D21 | M-007734- hypothetic    | 55197.00 P15RS     | 15.32 | 5.90  | 1.28  |
| 50002.00 D23 | M-005357- SCY1-like 3   | 57147.00 SCYL3     | 14.02 | 4.60  | 1.00  |
| 50002.00 E02 | M-020064- mannose ri    | 9902.00 MRC2       | 3.04  | 6.38  | -1.39 |
| 50002.00 E04 | M-015738- myelin pro    | 9019.00 MPZL1      | 3.67  | 5.75  | -1.25 |
| 50002.00 E05 | M-006742- inositol 1,4  | 3706.00 ITPKA      | 5.02  | 4.40  | -0.96 |
| 50002.00 E06 | M-010612- membrane      | 4356.00 MPP3       | 5.08  | 4.34  | -0.94 |
| 50002.00 E07 | M-006743- inositol 1,4  | 3707.00 ITPKB      | 3.23  | 6.19  | -1.35 |
| 50002.00 E08 | M-009729- membrane      | 4355.00 MPP2       | 3.38  | 6.04  | -1.31 |
| 50002.00 E09 | M-006744- inositol 1,4  | 80271.00 ITPKC     | 5.35  | 4.07  | -0.88 |
| 50002.00 E10 | M-010252- membrane      | 4354.00 MPP1       | 11.91 | 2.49  | 0.54  |
| 50002.00 E11 | M-003145- Janus kinas   | 3716.00 JAK1       | 22.12 | 12.70 | 2.76  |
| 50002.00 E12 | M-003859- v-mos Moli    | 4342.00 MOS        | 8.77  | 0.65  | -0.14 |
| 50002.00 E13 | M-003146- Janus kinas   | 3717.00 JAK2       | 4.92  | 4.50  | -0.98 |
| 50002.00 E14 | M-004908- MAP kinase    | 2872.00 MKNK2      | 5.09  | 4.33  | -0.94 |
| 50002.00 E15 | M-003147- Janus kinas   | 3718.00 JAK3       | 12.89 | 3.47  | 0.75  |

|              |                        |           |          |       |       |       |
|--------------|------------------------|-----------|----------|-------|-------|-------|
| 50002.00 E16 | M-004879- MAP kinase   | 8569.00   | MKNK1    | 7.90  | 1.52  | -0.33 |
| 50002.00 E17 | M-004844- TAO kinase   | 51347.00  | TAOK3    | 7.69  | 1.73  | -0.38 |
| 50002.00 E18 | M-004861- misshapen-   | 50488.00  | MINK1    | 7.29  | 2.13  | -0.46 |
| 50002.00 E19 | M-003148- kinase inse  | 3791.00   | KDR      | 6.48  | 2.94  | -0.64 |
| 50002.00 E20 | M-005350- alpha-kinas  | 57538.00  | ALPK3    | 12.66 | 3.24  | 0.70  |
| 50002.00 E21 | M-006745- ketohexoki   | 3795.00   | KHK      | 10.91 | 1.49  | 0.32  |
| 50002.00 E23 | M-004542- TRAF2 and    | 23043.00  | TNIK     | 7.25  | 2.17  | -0.47 |
| 50002.00 F02 | M-006795- phosphorit   | 5636.00   | PRPSAP2  | 4.05  | 5.37  | -1.17 |
| 50002.00 F04 | M-006794- phosphorit   | 5635.00   | PRPSAP1  | 2.25  | 7.17  | -1.56 |
| 50002.00 F05 | M-007735- protein kin  | 29993.00  | PACSIN1  | 14.36 | 4.94  | 1.07  |
| 50002.00 F06 | M-004877- phosphorit   | 5634.00   | PRPS2    | 1.09  | 8.33  | -1.81 |
| 50002.00 F07 | M-012956- phosphopr    | 55824.00  | PAG1     | 4.18  | 5.24  | -1.14 |
| 50002.00 F08 | M-006784- phosphorit   | 5631.00   | PRPS1    | 1.70  | 7.72  | -1.68 |
| 50002.00 F09 | M-003521- p21/Cdc42    | 5058.00   | PAK1     | 2.81  | 6.61  | -1.44 |
| 50002.00 F10 | M-004074- PRP4 pre-n   | 8899.00   | PRPF4B   | 7.27  | 2.15  | -0.47 |
| 50002.00 F11 | M-003597- p21 (CDKN    | 5062.00   | PAK2     | 15.11 | 5.69  | 1.24  |
| 50002.00 F12 | M-004661- protein kin  | 5616.00   | PRKY     | 3.70  | 5.72  | -1.24 |
| 50002.00 F13 | M-003614- p21 (CDKN    | 5063.00   | PAK3     | 10.88 | 1.46  | 0.32  |
| 50002.00 F14 | M-004660- protein kin  | 5613.00   | PRKX     | 3.41  | 6.01  | -1.31 |
| 50002.00 F15 | M-003615- p21(CDKN1    | 10298.00  | PAK4     | 2.16  | 7.26  | -1.58 |
| 50002.00 F16 | M-005031- WNK lysine   | 65266.00  | WNK4     | 2.15  | 7.27  | -1.58 |
| 50002.00 F17 | M-004338- p21(CDKN1    | 56924.00  | PAK6     | 5.48  | 3.94  | -0.86 |
| 50002.00 F18 | M-005364- WNK lysine   | 65267.00  | WNK3     | 9.48  | 0.06  | 0.01  |
| 50002.00 F19 | M-003973- p21(CDKN1    | 57144.00  | PAK7     | 7.02  | 2.40  | -0.52 |
| 50002.00 F20 | M-005363- WNK lysine   | 65268.00  | WNK2     | 3.57  | 5.85  | -1.27 |
| 50002.00 F21 | M-004057- pantothen:   | 53354.00  | PANK1    | 16.82 | 7.40  | 1.61  |
| 50002.00 F23 | M-006758- pantothen:   | 79646.00  | PANK3    | 5.51  | 3.91  | -0.85 |
| 50002.00 G02 | M-005349- CaM kinase   | 79012.00  | CAMKV    | 6.25  | 3.17  | -0.69 |
| 50002.00 G04 | M-007684- acyl-Coenz   | 80724.00  | ACAD10   | 7.89  | 1.53  | -0.33 |
| 50002.00 G05 | M-004046- microtubul   | 23031.00  | MAST3    | 3.37  | 6.05  | -1.32 |
| 50002.00 G06 | M-005348- serine/thre  | 83931.00  | STK40    | 15.55 | 6.13  | 1.33  |
| 50002.00 G07 | M-004779- KIAA0999 Ꞥ   | 23387.00  | KIAA0999 | 5.66  | 3.76  | -0.82 |
| 50002.00 G08 | M-008770- phosphatid   | 138429.00 | PIP5KL1  | 3.31  | 6.11  | -1.33 |
| 50002.00 G09 | M-004846- TAO kinase   | 57551.00  | TAOK1    | 6.84  | 2.58  | -0.56 |
| 50002.00 G10 | M-005017- doublecort   | 166614.00 | DCLK2    | 2.78  | 6.64  | -1.44 |
| 50002.00 G11 | M-023172- membrane     | 57574.00  | MARCH4   | 6.82  | 2.60  | -0.57 |
| 50002.00 G12 | M-005347- chromoson    | 169436.00 | C9orf96  | 8.83  | 0.59  | -0.13 |
| 50002.00 G13 | M-005336- KIAA1639 Ꞥ   | 57729.00  | KIAA1639 | 8.76  | 0.66  | -0.14 |
| 50002.00 G14 | M-005016- hypothetical | 167359.00 | MGC42105 | 20.01 | 10.59 | 2.30  |
| 50002.00 G15 | M-005337- doublecort   | 85443.00  | DCLK3    | 13.86 | 4.44  | 0.96  |
| 50002.00 G16 | M-004681- casein kina  | 122011.00 | CSNK1A1L | 7.09  | 2.33  | -0.51 |
| 50002.00 G17 | M-004063- mixed line:  | 84451.00  | KIAA1804 | 9.55  | 0.13  | 0.03  |
| 50002.00 G18 | M-004783- PIP5K1A ps   | 206426.00 | MGC26597 | 14.02 | 4.60  | 1.00  |
| 50002.00 G19 | M-004619- BR serine/t  | 84446.00  | BRSK1    | 11.96 | 2.54  | 0.55  |
| 50002.00 G20 | M-004634- serine/thre  | 202374.00 | STK32A   | 26.60 | 17.18 | 3.73  |
| 50002.00 G21 | M-005338- lemur tyro:  | 114783.00 | LMTK3    | 11.70 | 2.28  | 0.49  |
| 50002.00 G23 | M-004963- kinesin far  | 23303.00  | KIF13B   | 7.60  | 1.82  | -0.40 |

|              |                       |                   |       |       |       |
|--------------|-----------------------|-------------------|-------|-------|-------|
| 50002.00 H02 | M-005362- WNK lysine  | 65125.00 WNK1     | 6.17  | 3.25  | -0.71 |
| 50002.00 H04 | M-006426- protein kin | 8575.00 PRKRA     | 3.83  | 5.59  | -1.22 |
| 50002.00 H05 | M-006759- pantothen;  | 55229.00 PANK4    | 6.40  | 3.02  | -0.66 |
| 50002.00 H06 | M-003527- eukaryotic  | 5610.00 EIF2AK2   | 6.54  | 2.88  | -0.63 |
| 50002.00 H07 | M-007736- 3'-phospho  | 9061.00 PAPSS1    | 2.94  | 6.48  | -1.41 |
| 50002.00 H08 | M-004659- protein kin | 5593.00 PRKG2     | 3.59  | 5.83  | -1.27 |
| 50002.00 H09 | M-006760- 3'-phospho  | 9060.00 PAPSS2    | 3.42  | 6.00  | -1.30 |
| 50002.00 H10 | M-004658- protein kin | 5592.00 PRKG1     | 12.90 | 3.48  | 0.76  |
| 50002.00 H11 | M-005018- PAS domaii  | 23178.00 PASK     | 9.03  | 0.39  | -0.09 |
| 50002.00 H12 | M-005030- protein kin | 5591.00 PRKDC     | 9.75  | 0.33  | 0.07  |
| 50002.00 H13 | M-006796- phosphoen   | 5105.00 PCK1      | 7.39  | 2.03  | -0.44 |
| 50002.00 H14 | M-004197- protein kin | 25865.00 PRKD2    | 6.55  | 2.87  | -0.62 |
| 50002.00 H15 | M-006797- phosphoen   | 5106.00 PCK2      | 3.93  | 5.49  | -1.19 |
| 50002.00 H16 | M-003526- protein kin | 5590.00 PRKCZ     | 8.84  | 0.58  | -0.13 |
| 50002.00 H17 | M-004313- PCTAIRE pr  | 5127.00 PCTK1     | 9.30  | 0.12  | -0.03 |
| 50002.00 H18 | M-010618- protein kin | 5589.00 PRKCSH    | 12.68 | 3.26  | 0.71  |
| 50002.00 H19 | M-004835- PCTAIRE pr  | 5128.00 PCTK2     | 11.76 | 2.34  | 0.51  |
| 50002.00 H20 | M-003525- protein kin | 5588.00 PRKCQ     | 8.38  | 1.04  | -0.23 |
| 50002.00 H21 | M-004836- PCTAIRE pr  | 5129.00 PCTK3     | 15.81 | 6.39  | 1.39  |
| 50002.00 H23 | M-003162- platelet-de | 5156.00 PDGFRA    | 7.85  | 1.57  | -0.34 |
| 50002.00 I02 | M-005346- hypothetic: | 93627.00 MGC16169 | 6.62  | 2.80  | -0.61 |
| 50002.00 I04 | M-003156- met proto-  | 4233.00 MET       | 9.56  | 0.14  | 0.03  |
| 50002.00 I05 | M-003981- U2AF homc   | 127933.00 UHMK1   | 22.50 | 13.08 | 2.84  |
| 50002.00 I06 | M-003155- c-mer prot  | 10461.00 MERTK    | 14.13 | 4.71  | 1.02  |
| 50002.00 I07 | M-003150- v-kit Hardy | 3815.00 KIT       | 5.62  | 3.80  | -0.83 |
| 50002.00 I08 | M-004029- maternal e  | 9833.00 MELK      | 10.05 | 0.63  | 0.14  |
| 50002.00 I09 | M-003149- lemur tyro: | 22853.00 LMTK2    | 6.68  | 2.74  | -0.60 |
| 50002.00 I10 | M-021396- MAP3K12 t   | 51562.00 MBIP     | 7.57  | 1.85  | -0.40 |
| 50002.00 I11 | M-005322- kinase sup  | 283455.00 KSR2    | 5.58  | 3.84  | -0.83 |
| 50002.00 I12 | M-003154- megakaryo   | 4145.00 MATK      | 14.32 | 4.90  | 1.06  |
| 50002.00 I13 | M-005009- alpha-kinas | 80216.00 ALPK1    | 6.48  | 2.94  | -0.64 |
| 50002.00 I14 | M-004633- microtubul  | 23139.00 MAST2    | 5.95  | 3.47  | -0.75 |
| 50002.00 I15 | M-004632- LATS, large | 9113.00 LATS1     | 8.32  | 1.10  | -0.24 |
| 50002.00 I16 | M-005345- MAP/micrc   | 57787.00 MARK4    | 6.60  | 2.82  | -0.61 |
| 50002.00 I17 | M-003865- LATS, large | 26524.00 LATS2    | 9.76  | 0.34  | 0.07  |
| 50002.00 I18 | M-003517- MAP/micrc   | 4140.00 MARK3     | 13.33 | 3.91  | 0.85  |
| 50002.00 I19 | M-003151- lymphocyt   | 3932.00 LCK       | 18.42 | 9.00  | 1.95  |
| 50002.00 I20 | M-004260- MAP/micrc   | 2011.00 MARK2     | 7.70  | 1.72  | -0.37 |
| 50002.00 I21 | M-012120- lymphocyt   | 3937.00 LCP2      | 16.44 | 7.02  | 1.52  |
| 50002.00 I23 | M-006930- PDZ and LII | 10611.00 PDLIM5   | 16.50 | 7.08  | 1.54  |
| 50002.00 J02 | M-005029- protein kin | 23683.00 PRKD3    | 3.12  | 6.30  | -1.37 |
| 50002.00 J04 | M-005028- protein kin | 5587.00 PRKD1     | 4.87  | 4.55  | -0.99 |
| 50002.00 J05 | M-003163- platelet-de | 5159.00 PDGFRB    | 5.83  | 3.59  | -0.78 |
| 50002.00 J06 | M-004612- protein kin | 5586.00 PKN2      | 8.86  | 0.56  | -0.12 |
| 50002.00 J07 | M-005019- pyruvate d  | 5163.00 PDK1      | 12.93 | 3.51  | 0.76  |
| 50002.00 J08 | M-004175- protein kin | 5585.00 PKN1      | 7.69  | 1.73  | -0.38 |
| 50002.00 J09 | M-005020- pyruvate d  | 5164.00 PDK2      | 14.00 | 4.58  | 0.99  |

|              |                        |                   |       |       |       |
|--------------|------------------------|-------------------|-------|-------|-------|
| 50002.00 J10 | M-004656- protein kin  | 5584.00 PRKCI     | 8.94  | 0.48  | -0.11 |
| 50002.00 J11 | M-005021- pyruvate d   | 5165.00 PDK3      | 5.78  | 3.64  | -0.79 |
| 50002.00 J12 | M-004655- protein kin  | 5583.00 PRKCH     | 7.41  | 2.01  | -0.44 |
| 50002.00 J13 | M-019425- pyruvate d   | 5166.00 PDK4      | 7.47  | 1.95  | -0.42 |
| 50002.00 J14 | M-004654- protein kin  | 5582.00 PRKCG     | 16.13 | 6.71  | 1.46  |
| 50002.00 J15 | M-003017- 3-phosphoi   | 5170.00 PDPK1     | 10.70 | 1.28  | 0.28  |
| 50002.00 J16 | M-004653- protein kin  | 5581.00 PRKCE     | 9.63  | 0.21  | 0.04  |
| 50002.00 J17 | M-005070- pyridoxal (j | 8566.00 PDXX      | 12.68 | 3.26  | 0.71  |
| 50002.00 J18 | M-003524- protein kin  | 5580.00 PRKCD     | 11.59 | 2.17  | 0.47  |
| 50002.00 J19 | M-006761- 6-phosphoi   | 5207.00 PFKFB1    | 17.40 | 7.98  | 1.73  |
| 50002.00 J20 | M-003758- protein kin  | 5579.00 PRKCB1    | 19.13 | 9.71  | 2.11  |
| 50002.00 J21 | M-006762- 6-phosphoi   | 5208.00 PFKFB2    | 16.62 | 7.20  | 1.56  |
| 50002.00 J23 | M-006763- 6-phosphoi   | 5209.00 PFKFB3    | 13.03 | 3.61  | 0.78  |
| 50002.00 K02 | M-004259- MAP/micrc    | 4139.00 MARK1     | 7.26  | 2.16  | -0.47 |
| 50002.00 K04 | M-005015- mitogen-ac   | 8550.00 MAPKAPK5  | 5.77  | 3.65  | -0.79 |
| 50002.00 K05 | M-007730- LIM domaii   | 3984.00 LIMK1     | 7.75  | 1.67  | -0.36 |
| 50002.00 K06 | M-005014- mitogen-ac   | 7867.00 MAPKAPK3  | 5.28  | 4.14  | -0.90 |
| 50002.00 K07 | M-003311- LIM domaii   | 3985.00 LIMK2     | 9.35  | 0.07  | -0.02 |
| 50002.00 K08 | M-003516- mitogen-ac   | 9261.00 MAPKAPK2  | 15.45 | 6.03  | 1.31  |
| 50002.00 K09 | M-015901- ecotropic v  | 115704.00 EVI5L   | 5.70  | 3.72  | -0.81 |
| 50002.00 K10 | M-003505- mitogen-ac   | 5601.00 MAPK9     | 9.26  | 0.16  | -0.03 |
| 50002.00 K11 | M-005011- PDLIM1 int   | 149420.00 PDIK1L  | 13.50 | 4.08  | 0.88  |
| 50002.00 K12 | M-003596- mitogen-ac   | 23162.00 MAPK8IP3 | 13.78 | 4.36  | 0.95  |
| 50002.00 K13 | M-006804- phosphorit   | 221823.00 PRPS1L1 | 12.16 | 2.74  | 0.59  |
| 50002.00 K14 | M-012462- mitogen-ac   | 23542.00 MAPK8IP2 | 12.25 | 2.83  | 0.61  |
| 50002.00 K15 | M-005340- nuclear rec  | 340371.00 NRBP2   | 8.53  | 0.89  | -0.19 |
| 50002.00 K16 | M-003595- mitogen-ac   | 9479.00 MAPK8IP1  | 6.35  | 3.07  | -0.67 |
| 50002.00 K17 | M-005342- MLCK prote   | 91807.00 MLCK     | 16.51 | 7.09  | 1.54  |
| 50002.00 K18 | M-003514- mitogen-ac   | 5599.00 MAPK8     | 6.91  | 2.51  | -0.55 |
| 50002.00 K19 | M-003152- leukocyte t  | 4058.00 LTK       | 8.93  | 0.49  | -0.11 |
| 50002.00 K20 | M-003513- mitogen-ac   | 5598.00 MAPK7     | 7.57  | 1.85  | -0.40 |
| 50002.00 K21 | M-005343- protein kin  | 92335.00 LYK5     | 16.56 | 7.14  | 1.55  |
| 50002.00 K23 | M-003153- v-yes-1 Yar  | 4067.00 LYN       | 10.86 | 1.44  | 0.31  |
| 50002.00 L02 | M-020124- protein inti | 9463.00 PICK1     | 2.66  | 6.76  | -1.47 |
| 50002.00 L04 | M-003523- protein kin  | 5578.00 PRKCA     | 5.91  | 3.51  | -0.76 |
| 50002.00 L05 | M-006764- 6-phosphoi   | 5210.00 PFKFB4    | 10.44 | 1.02  | 0.22  |
| 50002.00 L06 | M-007673- protein kin  | 5577.00 PRKAR2B   | 5.85  | 3.57  | -0.78 |
| 50002.00 L07 | M-006822- phosphofru   | 5211.00 PFKL      | 7.90  | 1.52  | -0.33 |
| 50002.00 L08 | M-007671- protein kin  | 5576.00 PRKAR2A   | 4.83  | 4.59  | -1.00 |
| 50002.00 L09 | M-006765- phosphofru   | 5213.00 PFKM      | 8.67  | 0.75  | -0.16 |
| 50002.00 L10 | M-007670- protein kin  | 5573.00 PRKAR1A   | 11.20 | 1.78  | 0.39  |
| 50002.00 L11 | M-010253- phosphofru   | 5214.00 PFKP      | 7.54  | 1.88  | -0.41 |
| 50002.00 L12 | M-009859- protein kin  | 53632.00 PRKAG3   | 28.44 | 19.02 | 4.13  |
| 50002.00 L13 | M-004837- PFTAIRE pr   | 5218.00 PFTK1     | 5.57  | 3.85  | -0.84 |
| 50002.00 L14 | M-009056- protein kin  | 5571.00 PRKAG1    | 12.94 | 3.52  | 0.77  |
| 50002.00 L15 | M-006767- phosphogly   | 5230.00 PGK1      | 11.69 | 2.27  | 0.49  |
| 50002.00 L16 | M-004651- protein kin  | 5568.00 PRKACG    | 15.30 | 5.88  | 1.28  |



|              |                       |                   |       |       |       |
|--------------|-----------------------|-------------------|-------|-------|-------|
| 50002.00 L17 | M-006768- phosphogly  | 5232.00 PGK2      | 12.53 | 3.11  | 0.67  |
| 50002.00 L18 | M-004650- protein kin | 5567.00 PRKACB    | 13.77 | 4.35  | 0.94  |
| 50002.00 L19 | M-019682- phosphoryl  | 5255.00 PHKA1     | 10.81 | 1.39  | 0.30  |
| 50002.00 L20 | M-004649- protein kin | 5566.00 PRKACA    | 16.75 | 7.33  | 1.59  |
| 50002.00 L21 | M-007669- phosphoryl  | 5256.00 PHKA2     | 16.52 | 7.10  | 1.54  |
| 50002.00 L23 | M-005023- phosphoryl  | 5260.00 PHKG1     | 5.69  | 3.73  | -0.81 |
| 50002.00 M02 | M-003594- mitogen-ac  | 5597.00 MAPK6     | 7.63  | 1.79  | -0.39 |
| 50002.00 M04 | M-003593- mitogen-ac  | 5596.00 MAPK4     | 12.53 | 3.11  | 0.68  |
| 50002.00 M05 | M-020068- SMAD fami   | 4092.00 SMAD7     | 12.74 | 3.32  | 0.72  |
| 50002.00 M06 | M-003592- mitogen-ac  | 5595.00 MAPK3     | 20.18 | 10.76 | 2.34  |
| 50002.00 M07 | M-009453- membrane    | 260425.00 MAGI3   | 8.43  | 0.99  | -0.22 |
| 50002.00 M08 | M-003512- mitogen-ac  | 1432.00 MAPK14    | 4.91  | 4.51  | -0.98 |
| 50002.00 M09 | M-004813- male germ   | 4117.00 MAK       | 22.61 | 13.19 | 2.87  |
| 50002.00 M10 | M-003591- mitogen-ac  | 5603.00 MAPK13    | 14.63 | 5.21  | 1.13  |
| 50002.00 M11 | M-005936- mucosa ass  | 10892.00 MALT1    | 22.06 | 12.64 | 2.74  |
| 50002.00 M12 | M-003590- mitogen-ac  | 6300.00 MAPK12    | 10.47 | 1.05  | 0.23  |
| 50002.00 M13 | M-003571- mitogen-ac  | 5604.00 MAP2K1    | 11.09 | 1.67  | 0.36  |
| 50002.00 M14 | M-003972- mitogen-ac  | 5600.00 MAPK11    | 13.11 | 3.69  | 0.80  |
| 50002.00 M15 | M-003572- mitogen-ac  | 8649.00 MAP2K1IP1 | 16.55 | 7.13  | 1.55  |
| 50002.00 M16 | M-004324- mitogen-ac  | 5602.00 MAPK10    | 10.00 | 0.58  | 0.13  |
| 50002.00 M17 | M-003573- mitogen-ac  | 5605.00 MAP2K2    | 11.75 | 2.33  | 0.50  |
| 50002.00 M18 | M-003555- mitogen-ac  | 5594.00 MAPK1     | 15.80 | 6.38  | 1.38  |
| 50002.00 M19 | M-003509- mitogen-ac  | 5606.00 MAP2K3    | 15.82 | 6.40  | 1.39  |
| 50002.00 M20 | M-003589- mitogen-ac  | 11183.00 MAP4K5   | 12.04 | 2.62  | 0.57  |
| 50002.00 M21 | M-003574- mitogen-ac  | 6416.00 MAP2K4    | 26.92 | 17.50 | 3.80  |
| 50002.00 M23 | M-003966- mitogen-ac  | 5607.00 MAP2K5    | 19.07 | 9.65  | 2.10  |
| 50002.00 N02 | M-005361- protein kin | 5563.00 PRKAA2    | 1.77  | 7.65  | -1.66 |
| 50002.00 N04 | M-005027- protein kin | 5562.00 PRKAA1    | 7.87  | 1.55  | -0.34 |
| 50002.00 N05 | M-004881- phosphoryl  | 5261.00 PHKG2     | 7.36  | 2.06  | -0.45 |
| 50002.00 N06 | M-008486- protein phc | 5531.00 PPP4C     | 6.65  | 2.77  | -0.60 |
| 50002.00 N07 | M-006769- phosphatid  | 55300.00 PI4K2B   | 7.74  | 1.69  | -0.37 |
| 50002.00 N08 | M-003599- protein phc | 5516.00 PPP2CB    | 1.06  | 8.36  | -1.82 |
| 50002.00 N09 | M-006770- phosphatid  | 55361.00 PI4K2A   | 15.78 | 6.36  | 1.38  |
| 50002.00 N10 | M-003598- protein phc | 5515.00 PPP2CA    | 7.64  | 1.78  | -0.39 |
| 50002.00 N11 | M-006771- phosphoinc  | 5286.00 PIK3C2A   | 8.16  | 1.26  | -0.27 |
| 50002.00 N12 | M-012745- protein phc | 84152.00 PPP1R1B  | 7.33  | 2.09  | -0.46 |
| 50002.00 N13 | M-006772- phosphoinc  | 5287.00 PIK3C2B   | 10.73 | 1.31  | 0.28  |
| 50002.00 N14 | M-006783- polynucleo  | 11284.00 PNKP     | 8.91  | 0.51  | -0.11 |
| 50002.00 N15 | M-006773- phosphoinc  | 5288.00 PIK3C2G   | 17.24 | 7.82  | 1.70  |
| 50002.00 N16 | M-006782- phosphom    | 10654.00 PMVK     | 6.80  | 2.62  | -0.57 |
| 50002.00 N17 | M-003018- phosphoinc  | 5290.00 PIK3CA    | 8.52  | 0.90  | -0.20 |
| 50002.00 N18 | M-010904- exosome c   | 5394.00 EXOSC10   | 17.56 | 8.14  | 1.77  |
| 50002.00 N19 | M-003019- phosphoinc  | 5291.00 PIK3CB    | 6.34  | 3.08  | -0.67 |
| 50002.00 N21 | M-005274- phosphoinc  | 5294.00 PIK3CG    | 10.59 | 1.17  | 0.25  |
| 50002.00 N23 | M-003020- phosphoinc  | 5295.00 PIK3R1    | 3.42  | 6.00  | -1.30 |
| 50002.00 O02 | M-003971- mitogen-ac  | 9448.00 MAP4K4    | 8.04  | 1.38  | -0.30 |
| 50002.00 O04 | M-003588- mitogen-ac  | 8491.00 MAP4K3    | 15.22 | 5.80  | 1.26  |

|              |                       |           |         |       |       |       |
|--------------|-----------------------|-----------|---------|-------|-------|-------|
| 50002.00 O05 | M-003967- mitogen-ac  | 5608.00   | MAP2K6  | 9.86  | 0.44  | 0.10  |
| 50002.00 O06 | M-003587- mitogen-ac  | 5871.00   | MAP4K2  | 9.41  | 0.01  | 0.00  |
| 50002.00 O07 | M-004016- mitogen-ac  | 5609.00   | MAP2K7  | 10.30 | 0.88  | 0.19  |
| 50002.00 O08 | M-003586- mitogen-ac  | 11184.00  | MAP4K1  | 5.38  | 4.04  | -0.88 |
| 50002.00 O09 | M-003575- mitogen-ac  | 4214.00   | MAP3K1  | 11.22 | 1.80  | 0.39  |
| 50002.00 O10 | M-003585- mitogen-ac  | 4293.00   | MAP3K9  | 14.59 | 5.17  | 1.12  |
| 50002.00 O11 | M-003576- mitogen-ac  | 4294.00   | MAP3K10 | 10.72 | 1.30  | 0.28  |
| 50002.00 O12 | M-003511- mitogen-ac  | 1326.00   | MAP3K8  | 10.92 | 1.50  | 0.32  |
| 50002.00 O13 | M-003577- mitogen-ac  | 4296.00   | MAP3K11 | 8.96  | 0.46  | -0.10 |
| 50002.00 O14 | M-003790- mitogen-ac  | 6885.00   | MAP3K7  | 24.13 | 14.71 | 3.20  |
| 50002.00 O15 | M-003312- mitogen-ac  | 7786.00   | MAP3K12 | 8.13  | 1.29  | -0.28 |
| 50002.00 O16 | M-003969- mitogen-ac  | 9064.00   | MAP3K6  | 3.75  | 5.67  | -1.23 |
| 50002.00 O17 | M-003579- mitogen-ac  | 9175.00   | MAP3K13 | 9.16  | 0.26  | -0.06 |
| 50002.00 O18 | M-003584- mitogen-ac  | 4217.00   | MAP3K5  | 7.18  | 2.24  | -0.49 |
| 50002.00 O19 | M-003580- mitogen-ac  | 9020.00   | MAP3K14 | 6.21  | 3.21  | -0.70 |
| 50002.00 O20 | M-003789- mitogen-ac  | 4216.00   | MAP3K4  | 12.74 | 3.32  | 0.72  |
| 50002.00 O21 | M-003582- mitogen-ac  | 10746.00  | MAP3K2  | 16.78 | 7.36  | 1.60  |
| 50002.00 O23 | M-003301- mitogen-ac  | 4215.00   | MAP3K3  | 8.00  | 1.42  | -0.31 |
| 50002.00 P02 | M-004647- protein kin | 29941.00  | PKN3    | 32.26 | 22.84 | 4.96  |
| 50002.00 P04 | M-005026- protein kin | 9088.00   | PKMYT1  | 13.49 | 4.07  | 0.88  |
| 50002.00 P05 | M-003021- phosphoin   | 5296.00   | PIK3R2  | 8.15  | 1.27  | -0.28 |
| 50002.00 P06 | M-006781- pyruvate ki | 5315.00   | PKM2    | 13.96 | 4.54  | 0.99  |
| 50002.00 P07 | M-019546- phosphoin   | 8503.00   | PIK3R3  | 17.00 | 7.58  | 1.65  |
| 50002.00 P08 | M-006780- pyruvate ki | 5313.00   | PKLR    | 11.29 | 1.87  | 0.41  |
| 50002.00 P09 | M-005025- phosphoin   | 30849.00  | PIK3R4  | 8.96  | 0.46  | -0.10 |
| 50002.00 P10 | M-008224- protein kin | 5570.00   | PKIB    | 19.40 | 9.98  | 2.17  |
| 50002.00 P11 | M-006776- phosphatid  | 5297.00   | PI4KA   | 6.50  | 2.92  | -0.64 |
| 50002.00 P12 | M-012321- protein kin | 5569.00   | PKIA    | 6.14  | 3.28  | -0.71 |
| 50002.00 P13 | M-006777- phosphatid  | 5298.00   | PI4KB   | 4.57  | 4.85  | -1.06 |
| 50002.00 P14 | M-004615- serine/thre | 282974.00 | STK32C  | 8.51  | 0.91  | -0.20 |
| 50002.00 P15 | M-003923- pim-1 oncc  | 5292.00   | PIM1    | 18.48 | 9.06  | 1.97  |
| 50002.00 P16 | M-014699- PITPNM far  | 83394.00  | PITPNM3 | 12.00 | 2.58  | 0.56  |
| 50002.00 P17 | M-005359- pim-2 oncc  | 11040.00  | PIM2    | 12.99 | 3.57  | 0.78  |
| 50002.00 P18 | M-004535- phosphatid  | 79837.00  | PIP4K2C | 11.26 | 1.84  | 0.40  |
| 50002.00 P19 | M-004030- PTEN induc  | 65018.00  | PINK1   | 7.09  | 2.33  | -0.51 |
| 50002.00 P20 | M-006779- phosphatid  | 8396.00   | PIP4K2B | 6.24  | 3.18  | -0.69 |
| 50002.00 P21 | M-004780- phosphatid  | 8394.00   | PIP5K1A | 10.45 | 1.03  | 0.22  |
| 50002.00 P23 | M-006778- phosphatid  | 5305.00   | PIP4K2A | 9.02  | 0.40  | -0.09 |
|              |                       |           | mdmdMAC | 9.42  | 3.11  |       |
|              |                       |           | 3*MAD   |       | 9.33  |       |
|              |                       |           | MADc    |       | 4.60  |       |
| 50002.00 C22 |                       |           |         | 59.88 |       | 45.31 |
| 50002.00 D22 |                       |           |         | 56.50 |       | 53.04 |
| 50002.00 E22 |                       |           |         | 52.34 |       | 50.56 |
| 50002.00 F22 |                       |           |         | 45.47 |       | 52.86 |
|              |                       |           | mn      | 53.55 |       | 50.44 |
|              |                       |           | sd      | 6.21  |       | 3.61  |

|              |       |       |
|--------------|-------|-------|
| 50002.00 G22 | 12.43 | 11.21 |
| 50002.00 H22 | 5.62  | 4.06  |
| 50002.00 I22 | 11.51 | 8.86  |
| 50002.00 J22 | 8.89  | 7.09  |
| mn           | 9.61  | 7.81  |
| sd           | 3.05  | 3.01  |
| 3psSD        | 18.62 | 10.82 |
| 3ngSD        | 9.16  | 9.03  |
| SumSD        | 27.79 | 19.85 |
| MeanDf       | 43.94 | 42.64 |
| SumovrMn     | 0.63  | 0.47  |
| 1minus       | 0.37  | 0.53  |

| <u>% inf</u> | <u>abs dev</u> | <u>robust Z</u> | <u>% inf</u> | <u>abs dev</u> | <u>robust Z</u> |              |
|--------------|----------------|-----------------|--------------|----------------|-----------------|--------------|
| 8.14         | 0.96           | -0.23           | 14.83        | 5.30           | 0.96            |              |
| 10.18        | 1.08           | 0.25            | 9.58         | 0.05           | 0.01            |              |
| 8.22         | 0.88           | -0.21           | 6.50         | 3.03           | -0.55           |              |
| 9.11         | 0.01           | 0.00            | 7.45         | 2.08           | -0.38           |              |
| 5.76         | 3.34           | -0.78           | 6.69         | 2.84           | -0.52           |              |
| 3.82         | 5.28           | -1.24           | 2.90         | 6.63           | -1.21           |              |
| 9.06         | 0.04           | -0.01           | 8.05         | 1.48           | -0.27           |              |
| 10.36        | 1.26           | 0.30            | 2.38         | 7.15           | -1.30           |              |
| 9.34         | 0.24           | 0.06            | 6.85         | 2.68           | -0.49           |              |
| 5.37         | 3.73           | -0.88           | 5.22         | 4.31           | -0.79           |              |
| 16.84        | 7.74           | 1.81            | 8.88         | 0.65           | -0.12           |              |
| 7.96         | 1.14           | -0.27           | 8.32         | 1.21           | -0.22           |              |
| 11.87        | 2.77           | 0.65            | 4.30         | 5.23           | -0.95           |              |
| 5.98         | 3.12           | -0.73           | 5.59         | 3.94           | -0.72           |              |
| 11.02        | 1.92           | 0.45            | 3.73         | 5.80           | -1.06           |              |
| 12.21        | 3.11           | 0.73            | 9.10         | 0.43           | -0.08           |              |
| 14.68        | 5.58           | 1.31            | 6.09         | 3.44           | -0.63           |              |
| <b>20.10</b> | <b>11.00</b>   | <b>2.58</b>     | <b>12.99</b> | <b>3.46</b>    | 0.63            | y            |
| 13.72        | 4.62           | 1.08            | 12.24        | 2.71           | 0.49            |              |
| 16.85        | 7.75           | 1.82            | 7.57         | 1.96           | -0.36           |              |
| 10.10        | 1.00           | 0.23            | 3.05         | 6.48           | -1.18           |              |
| 12.09        | 2.99           | 0.70            | 3.62         | 5.91           | -1.08           |              |
| 17.12        | 8.02           | 1.88            | 3.48         | 6.05           | -1.10           |              |
| 16.69        | 7.59           | 1.78            | 5.50         | 4.03           | -0.73           |              |
| 11.17        | 2.07           | 0.49            | 2.35         | 7.18           | -1.31           |              |
| 10.28        | 1.18           | 0.28            | 0.51         | 9.02           | -1.65           |              |
| 17.00        | 7.90           | 1.85            | 5.01         | 4.52           | -0.82           |              |
| 6.29         | 2.81           | -0.66           | 0.68         | 8.85           | -1.61           |              |
| 12.54        | 3.44           | 0.81            | 3.79         | 5.74           | -1.05           |              |
| 9.28         | 0.18           | 0.04            | 1.24         | 8.29           | -1.51           |              |
| 15.38        | 6.28           | 1.47            | 1.95         | 7.58           | -1.38           |              |
| 11.59        | 2.49           | 0.58            | 3.48         | 6.05           | -1.10           |              |
| 13.22        | 4.12           | 0.97            | 3.59         | 5.94           | -1.08           |              |
| 11.57        | 2.47           | 0.58            | 1.61         | 7.92           | -1.44           |              |
| 6.52         | 2.58           | -0.60           | 1.91         | 7.62           | -1.39           |              |
| 27.22        | <b>18.12</b>   | <b>4.25</b>     | 4.72         | 4.81           | -0.88           | x debris a,c |
| 6.81         | 2.29           | -0.54           | 3.81         | 5.72           | -1.04           |              |
| 13.96        | 4.86           | 1.14            | 11.57        | 2.04           | 0.37            |              |
| 10.09        | 0.99           | 0.23            | 8.16         | 1.37           | -0.25           |              |
| 6.66         | 2.44           | -0.57           | 3.61         | 5.92           | -1.08           |              |
| 2.86         | 6.24           | -1.46           | 4.53         | 5.00           | -0.91           |              |
| 7.30         | 1.80           | -0.42           | 6.68         | 2.85           | -0.52           |              |
| 13.04        | 3.94           | 0.92            | 19.92        | 10.39          | 1.89            |              |
| 4.39         | 4.71           | -1.11           | 5.73         | 3.80           | -0.69           |              |
| 8.74         | 0.36           | -0.09           | 5.70         | 3.83           | -0.70           |              |
| 8.45         | 0.65           | -0.15           | 10.49        | 0.96           | 0.17            |              |

|       |       |       |       |       |        |
|-------|-------|-------|-------|-------|--------|
| 4.40  | 4.70  | -1.10 | 7.59  | 1.94  | -0.35  |
| 8.58  | 0.52  | -0.12 | 15.33 | 5.80  | 1.06   |
| 7.83  | 1.27  | -0.30 | 7.01  | 2.52  | -0.46  |
| 10.78 | 1.68  | 0.39  | 15.00 | 5.47  | 1.00   |
| 9.80  | 0.70  | 0.16  | 9.40  | 0.13  | -0.02  |
| 9.63  | 0.53  | 0.12  | 7.57  | 1.96  | -0.36  |
| 16.76 | 7.66  | 1.80  | 25.27 | 15.74 | 2.87 y |
| 19.26 | 10.16 | 2.38  | 11.59 | 2.06  | 0.38   |
| 9.94  | 0.84  | 0.20  | 9.18  | 0.35  | -0.07  |
| 6.74  | 2.36  | -0.55 | 15.14 | 5.61  | 1.02   |
| 15.98 | 6.88  | 1.61  | 15.05 | 5.52  | 1.01   |
| 7.61  | 1.49  | -0.35 | 16.37 | 6.84  | 1.25   |
| 6.67  | 2.43  | -0.57 | 17.87 | 8.34  | 1.52   |
| 13.94 | 4.84  | 1.14  | 24.05 | 14.52 | 2.65   |
| 1.88  | 7.22  | -1.69 | 7.58  | 1.95  | -0.36  |
| 7.03  | 2.07  | -0.49 | 11.14 | 1.61  | 0.29   |
| 6.59  | 2.51  | -0.59 | 10.16 | 0.63  | 0.11   |
| 3.79  | 5.31  | -1.25 | 5.82  | 3.71  | -0.68  |
| 3.93  | 5.17  | -1.21 | 6.70  | 2.83  | -0.52  |
| 5.45  | 3.65  | -0.86 | 7.97  | 1.56  | -0.29  |
| 6.56  | 2.54  | -0.59 | 11.01 | 1.48  | 0.27   |
| 7.19  | 1.91  | -0.45 | 12.40 | 2.87  | 0.52   |
| 6.09  | 3.01  | -0.71 | 7.77  | 1.76  | -0.32  |
| 6.92  | 2.18  | -0.51 | 11.09 | 1.56  | 0.28   |
| 10.38 | 1.28  | 0.30  | 8.20  | 1.33  | -0.24  |
| 10.99 | 1.89  | 0.44  | 13.21 | 3.68  | 0.67   |
| 15.86 | 6.76  | 1.58  | 12.36 | 2.83  | 0.52   |
| 13.01 | 3.91  | 0.92  | 3.15  | 6.38  | -1.16  |
| 17.12 | 8.02  | 1.88  | 9.16  | 0.37  | -0.07  |
| 10.51 | 1.41  | 0.33  | 8.74  | 0.79  | -0.14  |
| 13.00 | 3.90  | 0.92  | 13.62 | 4.09  | 0.74   |
| 3.65  | 5.45  | -1.28 | 6.67  | 2.86  | -0.52  |
| 12.82 | 3.72  | 0.87  | 11.63 | 2.10  | 0.38   |
| 9.95  | 0.85  | 0.20  | 5.78  | 3.75  | -0.69  |
| 0.74  | 8.36  | -1.96 | 10.85 | 1.32  | 0.24   |
| 4.14  | 4.96  | -1.16 | 8.80  | 0.73  | -0.13  |
| 3.13  | 5.98  | -1.40 | 5.45  | 4.08  | -0.74  |
| 5.91  | 3.19  | -0.75 | 8.76  | 0.77  | -0.14  |
| 2.51  | 6.59  | -1.55 | 3.21  | 6.32  | -1.15  |
| 0.51  | 8.59  | -2.01 | 4.02  | 5.51  | -1.01  |
| 2.68  | 6.42  | -1.51 | 4.32  | 5.21  | -0.95  |
| 2.30  | 6.80  | -1.60 | 3.68  | 5.85  | -1.07  |
| 22.32 | 13.22 | 3.10  | 34.18 | 24.65 | 4.49 y |
| 3.49  | 5.61  | -1.32 | 6.22  | 3.31  | -0.60  |
| 5.69  | 3.41  | -0.80 | 7.25  | 2.28  | -0.42  |
| 0.86  | 8.24  | -1.93 | 6.51  | 3.02  | -0.55  |
| 4.15  | 4.95  | -1.16 | 8.86  | 0.67  | -0.12  |

|       |       |       |       |       |        |
|-------|-------|-------|-------|-------|--------|
| 2.75  | 6.35  | -1.49 | 7.30  | 2.23  | -0.41  |
| 6.22  | 2.88  | -0.68 | 7.29  | 2.24  | -0.41  |
| 2.26  | 6.84  | -1.61 | 3.15  | 6.38  | -1.16  |
| 7.17  | 1.93  | -0.45 | 9.73  | 0.20  | 0.04   |
| 4.30  | 4.80  | -1.13 | 6.62  | 2.91  | -0.53  |
| 12.98 | 3.88  | 0.91  | 12.04 | 2.51  | 0.46   |
| 14.11 | 5.01  | 1.18  | 17.21 | 7.68  | 1.40   |
| 7.49  | 1.61  | -0.38 | 3.62  | 5.91  | -1.08  |
| 7.56  | 1.54  | -0.36 | 7.16  | 2.37  | -0.43  |
| 13.87 | 4.77  | 1.12  | 13.70 | 4.17  | 0.76   |
| 15.09 | 5.99  | 1.40  | 6.52  | 3.01  | -0.55  |
| 14.08 | 4.98  | 1.17  | 13.81 | 4.28  | 0.78   |
| 8.56  | 0.54  | -0.13 | 3.24  | 6.29  | -1.15  |
| 4.31  | 4.79  | -1.12 | 4.38  | 5.15  | -0.94  |
| 11.65 | 2.55  | 0.60  | 10.73 | 1.20  | 0.22   |
| 23.80 | 14.70 | 3.45  | 15.02 | 5.49  | 1.00   |
| 7.79  | 1.31  | -0.31 | 3.62  | 5.91  | -1.08  |
| 21.07 | 11.97 | 2.81  | 12.10 | 2.57  | 0.47   |
| 11.70 | 2.60  | 0.61  | 4.56  | 4.97  | -0.91  |
| 11.13 | 2.03  | 0.48  | 3.91  | 5.62  | -1.02  |
| 7.39  | 1.71  | -0.40 | 2.99  | 6.54  | -1.19  |
| 13.76 | 4.66  | 1.09  | 8.74  | 0.79  | -0.14  |
| 13.64 | 4.54  | 1.06  | 9.84  | 0.31  | 0.06   |
| 12.95 | 3.85  | 0.90  | 6.24  | 3.29  | -0.60  |
| 12.69 | 3.59  | 0.84  | 8.76  | 0.77  | -0.14  |
| 16.02 | 6.92  | 1.62  | 16.85 | 7.32  | 1.33   |
| 11.01 | 1.91  | 0.45  | 14.77 | 5.24  | 0.95   |
| 5.52  | 3.58  | -0.84 | 16.35 | 6.82  | 1.24   |
| 28.62 | 19.52 | 4.58  | 16.18 | 6.65  | 1.21   |
| 5.80  | 3.30  | -0.77 | 7.87  | 1.66  | -0.30  |
| 16.28 | 7.18  | 1.68  | 17.16 | 7.63  | 1.39   |
| 11.33 | 2.23  | 0.52  | 7.59  | 1.94  | -0.35  |
| 5.35  | 3.75  | -0.88 | 3.58  | 5.96  | -1.09  |
| 9.26  | 0.16  | 0.04  | 5.33  | 4.20  | -0.77  |
| 7.20  | 1.90  | -0.45 | 9.34  | 0.19  | -0.04  |
| 6.41  | 2.69  | -0.63 | 9.94  | 0.41  | 0.07   |
| 13.01 | 3.91  | 0.92  | 11.48 | 1.95  | 0.36   |
| 11.28 | 2.18  | 0.51  | 9.35  | 0.18  | -0.03  |
| 18.25 | 9.15  | 2.15  | 18.54 | 9.01  | 1.64 y |
| 17.49 | 8.39  | 1.97  | 12.24 | 2.71  | 0.49   |
| 7.77  | 1.33  | -0.31 | 8.98  | 0.55  | -0.10  |
| 8.45  | 0.65  | -0.15 | 10.88 | 1.35  | 0.25   |
| 13.84 | 4.74  | 1.11  | 19.09 | 9.56  | 1.74   |
| 10.57 | 1.47  | 0.35  | 25.01 | 15.48 | 2.82   |
| 11.39 | 2.29  | 0.54  | 14.32 | 4.79  | 0.87   |
| 9.34  | 0.24  | 0.06  | 11.35 | 1.82  | 0.33   |
| 4.77  | 4.33  | -1.02 | 5.42  | 4.11  | -0.75  |

|       |       |       |       |       |        |
|-------|-------|-------|-------|-------|--------|
| 14.84 | 5.74  | 1.35  | 13.44 | 3.91  | 0.71   |
| 4.13  | 4.97  | -1.17 | 9.13  | 0.40  | -0.07  |
| 5.90  | 3.20  | -0.75 | 10.08 | 0.55  | 0.10   |
| 16.16 | 7.06  | 1.66  | 24.57 | 15.04 | 2.74   |
| 4.45  | 4.65  | -1.09 | 7.53  | 2.00  | -0.37  |
| 9.71  | 0.61  | 0.14  | 8.63  | 0.90  | -0.16  |
| 5.86  | 3.24  | -0.76 | 5.27  | 4.26  | -0.78  |
| 8.04  | 1.06  | -0.25 | 13.21 | 3.68  | 0.67   |
| 10.48 | 1.38  | 0.32  | 16.07 | 6.54  | 1.19   |
| 4.69  | 4.41  | -1.03 | 8.46  | 1.07  | -0.20  |
| 10.07 | 0.97  | 0.23  | 9.91  | 0.38  | 0.07   |
| 7.58  | 1.52  | -0.36 | 11.46 | 1.93  | 0.35   |
| 3.67  | 5.43  | -1.27 | 5.12  | 4.41  | -0.80  |
| 5.16  | 3.94  | -0.92 | 10.60 | 1.07  | 0.19   |
| 6.38  | 2.72  | -0.64 | 5.10  | 4.43  | -0.81  |
| 19.64 | 10.54 | 2.47  | 18.34 | 8.81  | 1.61   |
| 8.40  | 0.70  | -0.16 | 11.83 | 2.30  | 0.42   |
| 5.93  | 3.17  | -0.74 | 7.21  | 2.32  | -0.42  |
| 11.46 | 2.36  | 0.55  | 12.81 | 3.28  | 0.60   |
| 7.21  | 1.89  | -0.44 | 5.81  | 3.72  | -0.68  |
| 6.62  | 2.48  | -0.58 | 11.76 | 2.23  | 0.41   |
| 7.19  | 1.91  | -0.45 | 11.05 | 1.52  | 0.28   |
| 8.40  | 0.70  | -0.16 | 26.79 | 17.26 | 3.15 y |
| 8.76  | 0.34  | -0.08 | 21.08 | 11.55 | 2.11   |
| 8.27  | 0.83  | -0.19 | 11.42 | 1.89  | 0.34   |
| 9.13  | 0.03  | 0.01  | 14.64 | 5.11  | 0.93   |
| 10.14 | 1.04  | 0.24  | 15.16 | 5.63  | 1.03   |
| 10.62 | 1.52  | 0.36  | 17.63 | 8.10  | 1.48   |
| 10.50 | 1.40  | 0.33  | 8.88  | 0.65  | -0.12  |
| 11.80 | 2.70  | 0.63  | 20.12 | 10.59 | 1.93   |
| 6.77  | 2.33  | -0.55 | 12.68 | 3.15  | 0.57   |
| 11.40 | 2.30  | 0.54  | 19.84 | 10.31 | 1.88   |
| 4.18  | 4.92  | -1.15 | 9.16  | 0.37  | -0.07  |
| 8.89  | 0.21  | -0.05 | 11.97 | 2.44  | 0.44   |
| 12.77 | 3.67  | 0.86  | 16.14 | 6.61  | 1.20   |
| 14.38 | 5.28  | 1.24  | 8.31  | 1.22  | -0.22  |
| 11.86 | 2.76  | 0.65  | 20.63 | 11.10 | 2.02   |
| 4.99  | 4.11  | -0.96 | 15.42 | 5.89  | 1.07   |
| 18.61 | 9.51  | 2.23  | 18.67 | 9.14  | 1.67   |
| 13.76 | 4.66  | 1.09  | 25.43 | 15.90 | 2.90   |
| 14.59 | 5.49  | 1.29  | 18.12 | 8.59  | 1.56   |
| 14.19 | 5.09  | 1.19  | 13.35 | 3.82  | 0.70   |
| 6.86  | 2.24  | -0.53 | 7.63  | 1.90  | -0.35  |
| 10.93 | 1.83  | 0.43  | 10.32 | 0.79  | 0.14   |
| 15.41 | 6.31  | 1.48  | 15.43 | 5.90  | 1.07   |
| 11.10 | 2.00  | 0.47  | 6.02  | 3.51  | -0.64  |
| 15.78 | 6.68  | 1.57  | 21.45 | 11.92 | 2.17   |

|       |       |       |       |       |        |
|-------|-------|-------|-------|-------|--------|
| 13.18 | 4.08  | 0.96  | 14.50 | 4.97  | 0.91   |
| 13.84 | 4.74  | 1.11  | 14.09 | 4.56  | 0.83   |
| 16.38 | 7.28  | 1.71  | 9.64  | 0.11  | 0.02   |
| 7.39  | 1.71  | -0.40 | 9.53  | 0.00  | 0.00   |
| 10.64 | 1.54  | 0.36  | 11.82 | 2.29  | 0.42   |
| 16.13 | 7.03  | 1.65  | 9.70  | 0.17  | 0.03   |
| 9.14  | 0.04  | 0.01  | 12.40 | 2.87  | 0.52   |
| 16.09 | 6.99  | 1.64  | 9.38  | 0.15  | -0.03  |
| 10.93 | 1.83  | 0.43  | 12.67 | 3.14  | 0.57   |
| 8.56  | 0.54  | -0.13 | 8.64  | 0.89  | -0.16  |
| 12.75 | 3.65  | 0.86  | 10.65 | 1.12  | 0.20   |
| 17.82 | 8.72  | 2.04  | 16.99 | 7.46  | 1.36   |
| 9.75  | 0.65  | 0.15  | 12.37 | 2.84  | 0.52   |
| 7.18  | 1.92  | -0.45 | 5.23  | 4.30  | -0.79  |
| 5.97  | 3.13  | -0.73 | 2.77  | 6.76  | -1.23  |
| 4.42  | 4.68  | -1.10 | 4.13  | 5.40  | -0.99  |
| 5.08  | 4.02  | -0.94 | 3.93  | 5.60  | -1.02  |
| 7.18  | 1.92  | -0.45 | 4.92  | 4.61  | -0.84  |
| 9.26  | 0.16  | 0.04  | 6.36  | 3.17  | -0.58  |
| 7.54  | 1.56  | -0.37 | 3.92  | 5.61  | -1.02  |
| 12.77 | 3.67  | 0.86  | 6.58  | 2.95  | -0.54  |
| 11.15 | 2.05  | 0.48  | 9.88  | 0.35  | 0.06   |
| 9.13  | 0.03  | 0.01  | 5.52  | 4.01  | -0.73  |
| 15.73 | 6.63  | 1.55  | 23.45 | 13.92 | 2.54   |
| 8.08  | 1.02  | -0.24 | 6.82  | 2.71  | -0.49  |
| 12.08 | 2.98  | 0.70  | 5.27  | 4.26  | -0.78  |
| 6.69  | 2.41  | -0.57 | 5.08  | 4.45  | -0.81  |
| 12.55 | 3.45  | 0.81  | 9.81  | 0.28  | 0.05   |
| 5.42  | 3.68  | -0.86 | 7.23  | 2.30  | -0.42  |
| 6.26  | 2.84  | -0.67 | 6.73  | 2.80  | -0.51  |
| 26.55 | 17.45 | 4.09  | 7.27  | 2.26  | -0.41  |
| 16.49 | 7.39  | 1.73  | 14.57 | 5.04  | 0.92   |
| 6.90  | 2.20  | -0.52 | 5.59  | 3.94  | -0.72  |
| 7.00  | 2.10  | -0.49 | 8.83  | 0.70  | -0.13  |
| 5.99  | 3.11  | -0.73 | 15.93 | 6.40  | 1.17   |
| 6.22  | 2.88  | -0.67 | 58.49 | 48.96 | 8.93   |
| 4.55  | 4.55  | -1.07 | 7.30  | 2.23  | -0.41  |
| 8.55  | 0.55  | -0.13 | 13.94 | 4.41  | 0.80   |
| 4.84  | 4.26  | -1.00 | 12.94 | 3.41  | 0.62   |
| 9.19  | 0.09  | 0.02  | 14.21 | 4.68  | 0.85   |
| 9.66  | 0.56  | 0.13  | 14.53 | 5.00  | 0.91   |
| 5.88  | 3.22  | -0.76 | 7.63  | 1.90  | -0.35  |
| 31.77 | 22.67 | 5.32  | 23.51 | 13.98 | 2.55 y |
| 7.47  | 1.63  | -0.38 | 7.18  | 2.35  | -0.43  |
| 11.05 | 1.95  | 0.46  | 13.22 | 3.69  | 0.67   |
| 10.29 | 1.19  | 0.28  | 8.94  | 0.59  | -0.11  |
| 11.34 | 2.24  | 0.52  | 12.03 | 2.50  | 0.45   |



|              |              |             |              |              |               |
|--------------|--------------|-------------|--------------|--------------|---------------|
| 8.24         | 0.86         | -0.20       | 15.31        | 5.78         | 1.05          |
| 9.22         | 0.12         | 0.03        | 16.21        | 6.68         | 1.22          |
| 7.63         | 1.47         | -0.34       | 5.01         | 4.52         | -0.82         |
| 9.85         | 0.75         | 0.17        | 11.07        | 1.54         | 0.28          |
| 12.05        | 2.95         | 0.69        | 16.41        | 6.88         | 1.25          |
| 9.83         | 0.73         | 0.17        | 3.33         | 6.20         | -1.13         |
| 2.44         | 6.66         | -1.56       | 4.79         | 4.74         | -0.86         |
| 5.94         | 3.16         | -0.74       | 11.67        | 2.14         | 0.39          |
| 6.96         | 2.14         | -0.50       | 9.17         | 0.36         | -0.07         |
| <b>13.59</b> | <b>4.49</b>  | <b>1.05</b> | <b>23.30</b> | <b>13.77</b> | <b>2.51</b> y |
| 12.91        | 3.81         | 0.89        | 10.03        | 0.50         | 0.09          |
| 5.18         | 3.92         | -0.92       | 3.40         | 6.13         | -1.12         |
| 14.32        | 5.22         | 1.22        | 20.63        | 11.10        | <b>2.02</b> x |
| 7.23         | 1.87         | -0.44       | 14.90        | 5.37         | 0.98          |
| 10.07        | 0.97         | 0.23        | 17.44        | 7.91         | 1.44          |
| 6.86         | 2.24         | -0.53       | 11.38        | 1.85         | 0.34          |
| 4.25         | 4.85         | -1.14       | 9.29         | 0.24         | -0.04         |
| 4.39         | 4.71         | -1.11       | 4.24         | 5.29         | -0.96         |
| 6.07         | 3.03         | -0.71       | 12.03        | 2.50         | 0.46          |
| 6.23         | 2.87         | -0.67       | 12.59        | 3.06         | 0.56          |
| 6.62         | 2.48         | -0.58       | 9.90         | 0.37         | 0.07          |
| 5.53         | 3.57         | -0.84       | 11.92        | 2.39         | 0.43          |
| 4.64         | 4.46         | -1.05       | 14.29        | 4.76         | 0.87          |
| 7.02         | 2.08         | -0.49       | 17.82        | 8.29         | 1.51          |
| <b>16.84</b> | <b>7.74</b>  | <b>1.81</b> | <b>24.87</b> | <b>15.34</b> | <b>2.80</b> y |
| <b>20.36</b> | <b>11.26</b> | <b>2.64</b> | <b>21.66</b> | <b>12.13</b> | <b>2.21</b> y |
| 7.59         | 1.51         | -0.35       | 9.80         | 0.27         | 0.05          |
| 8.57         | 0.53         | -0.12       | 14.26        | 4.73         | 0.86          |
| 4.71         | 4.39         | -1.03       | 13.90        | 4.37         | 0.80          |
| 6.36         | 2.74         | -0.64       | 8.90         | 0.63         | -0.12         |
| 6.63         | 2.47         | -0.58       | 7.80         | 1.73         | -0.32         |
| 3.81         | 5.29         | -1.24       | 5.91         | 3.62         | -0.66         |
| 13.02        | 3.92         | 0.92        | 23.82        | <b>14.29</b> | <b>2.60</b>   |
| 4.36         | 4.74         | -1.11       | 10.99        | 1.46         | 0.27          |
| 3.61         | 5.49         | -1.29       | 6.88         | 2.65         | -0.48         |
| 9.12         | 0.02         | 0.00        | 16.90        | 7.37         | 1.34          |
| 9.55         | 0.45         | 0.11        | 17.07        | 7.54         | 1.37          |
| 6.31         | 2.79         | -0.65       | 19.47        | 9.94         | 1.81          |
| 12.93        | 3.83         | 0.90        | 16.82        | 7.29         | 1.33          |
| 15.14        | 6.04         | 1.42        | 10.20        | 0.67         | 0.12          |
| 5.08         | 4.02         | -0.94       | 16.23        | 6.70         | 1.22          |
| 10.71        | 1.61         | 0.38        | 24.28        | <b>14.75</b> | <b>2.69</b>   |
| 8.55         | 0.55         | -0.13       | 7.75         | 1.78         | -0.32         |
| 9.45         | 0.35         | 0.08        | 14.18        | 4.65         | 0.85          |
| 3.06         | 6.04         | -1.42       | 7.62         | 1.91         | -0.35         |
| 6.02         | 3.08         | -0.72       | 13.66        | 4.13         | 0.75          |
| 8.81         | 0.29         | -0.07       | 12.21        | 2.68         | 0.49          |

art b,c

|       |       |       |       |       |       |               |
|-------|-------|-------|-------|-------|-------|---------------|
| 8.53  | 0.57  | -0.13 | 12.53 | 3.00  | 0.55  |               |
| 5.00  | 4.10  | -0.96 | 11.93 | 2.40  | 0.44  |               |
| 10.31 | 1.21  | 0.28  | 13.54 | 4.01  | 0.73  |               |
| 6.13  | 2.97  | -0.70 | 12.13 | 2.60  | 0.47  |               |
| 8.31  | 0.79  | -0.18 | 17.92 | 8.39  | 1.53  |               |
| 7.95  | 1.15  | -0.27 | 13.96 | 4.43  | 0.81  |               |
| 6.27  | 2.83  | -0.67 | 14.03 | 4.50  | 0.82  |               |
| 4.46  | 4.64  | -1.09 | 12.02 | 2.49  | 0.45  |               |
| 9.02  | 0.08  | -0.02 | 13.77 | 4.24  | 0.77  |               |
| 11.43 | 2.33  | 0.55  | 16.57 | 7.04  | 1.28  |               |
| 4.97  | 4.13  | -0.97 | 9.19  | 0.34  | -0.06 |               |
| 5.17  | 3.93  | -0.92 | 9.14  | 0.39  | -0.07 |               |
| 11.27 | 2.17  | 0.51  | 11.83 | 2.30  | 0.42  |               |
| 9.59  | 0.49  | 0.12  | 12.52 | 2.99  | 0.54  |               |
| 10.65 | 1.55  | 0.36  | 11.13 | 1.60  | 0.29  |               |
| 7.40  | 1.70  | -0.40 | 20.47 | 10.94 | 1.99  |               |
| 10.06 | 0.96  | 0.22  | 9.30  | 0.23  | -0.04 |               |
| 12.07 | 2.97  | 0.70  | 4.97  | 4.56  | -0.83 |               |
| 37.50 | 28.40 | 6.66  | 5.68  | 3.85  | -0.70 | x toxic a,b,c |
| 11.45 | 2.35  | 0.55  | 4.82  | 4.71  | -0.86 |               |
| 10.65 | 1.55  | 0.36  | 6.14  | 3.39  | -0.62 |               |
| 15.53 | 6.43  | 1.51  | 10.90 | 1.37  | 0.25  |               |
| 9.10  | 0.00  | 0.00  | 6.96  | 2.58  | -0.47 |               |
| 8.49  | 0.61  | -0.14 | 14.25 | 4.72  | 0.86  |               |
| 5.89  | 3.21  | -0.75 | 6.22  | 3.31  | -0.60 |               |
| 13.16 | 4.06  | 0.95  | 4.72  | 4.81  | -0.88 |               |
| 9.28  | 0.18  | 0.04  | 4.20  | 5.34  | -0.97 |               |
| 7.54  | 1.56  | -0.37 | 4.53  | 5.00  | -0.91 |               |
| 6.38  | 2.72  | -0.64 | 8.97  | 0.56  | -0.10 |               |
| 4.15  | 4.95  | -1.16 | 4.91  | 4.62  | -0.84 |               |
| 7.11  | 1.99  | -0.47 | 8.19  | 1.34  | -0.25 |               |
| 7.44  | 1.66  | -0.39 | 6.94  | 2.59  | -0.47 |               |
| 10.41 | 1.31  | 0.31  | 11.04 | 1.51  | 0.27  |               |
| 12.78 | 3.68  | 0.86  | 14.13 | 4.60  | 0.84  |               |
| 5.81  | 3.29  | -0.77 | 7.91  | 1.62  | -0.30 |               |
| 14.08 | 4.98  | 1.17  | 6.64  | 2.89  | -0.53 |               |
| 3.49  | 5.61  | -1.32 | 5.17  | 4.36  | -0.80 |               |
| 9.16  | 0.06  | 0.02  | 11.02 | 1.49  | 0.27  |               |
| 9.10  | 2.88  |       | 9.53  | 3.71  |       |               |
|       | 8.64  |       |       | 11.12 |       |               |
|       | 4.26  |       |       | 5.49  |       |               |
|       | 59.02 |       |       |       |       |               |
|       | 45.98 |       |       |       |       |               |
|       | 54.62 |       |       |       |       |               |
|       | 56.38 |       |       |       |       |               |
|       | 54.00 |       |       |       |       |               |
|       | 5.64  |       |       |       |       |               |

6.37  
5.87  
9.84  
10.28  
8.09  
2.29  
16.93  
6.87  
23.80  
45.91  
0.52  
0.48

|                     |                              |                      |  | <u>% inf</u>        | <u>abs dev</u> | <u>robust Z</u> |
|---------------------|------------------------------|----------------------|--|---------------------|----------------|-----------------|
| 50003.00 A05        | M-006786- ribokinase         | 64080.00 RBKS        |  | 11.82               | 0.15           | 0.03            |
| 50003.00 A07        | M-003170- ret proto-o        | 5979.00 RET          |  | 10.87               | 0.80           | -0.15           |
| 50003.00 A09        | M-006552- tripartite r       | 5987.00 TRIM27       |  | 8.13                | 3.54           | -0.66           |
| 50003.00 A11        | M-004662- G protein-c        | 6011.00 GRK1         |  | 18.28               | 6.61           | 1.23            |
| 50003.00 A13        | M-005368- RIO kinase         | 83732.00 RIOK1       |  | 8.02                | 3.65           | -0.68           |
| 50003.00 A15        | M-005040- RIO kinase         | 8780.00 RIOK3        |  | 21.94               | 10.27          | 1.92            |
| 50003.00 A17        | M-004445- receptor (T        | 8737.00 RIPK1        |  | 6.93                | 4.74           | -0.89           |
| 50003.00 A19        | M-003602- receptor-in        | 8767.00 RIPK2        |  | 12.51               | 0.84           | 0.16            |
| 50003.00 A21        | M-003534- receptor-in        | 11035.00 RIPK3       |  | 12.02               | 0.35           | 0.06            |
| 50003.00 A23        | M-005032- ribonuclea:        | 6041.00 RNASEL       |  | 12.35               | 0.68           | 0.13            |
| <b>50003.00 C05</b> | <b>M-003536- Rho-associ:</b> | <b>6093.00 ROCK1</b> |  | <b><u>27.79</u></b> | <b>16.12</b>   | <b>3.01</b>     |
| 50003.00 C07        | M-004610- Rho-associ:        | 9475.00 ROCK2        |  | 5.05                | 6.62           | -1.24           |
| 50003.00 C09        | M-003171- receptor ty        | 4919.00 ROR1         |  | 5.07                | 6.60           | -1.23           |
| 50003.00 C11        | M-003172- receptor ty        | 4920.00 ROR2         |  | 7.16                | 4.51           | -0.84           |
| 50003.00 C13        | M-003173- v-ros UR2 s        | 6098.00 ROS1         |  | 5.88                | 5.79           | -1.08           |
| 50003.00 C15        | M-012350- retinitis pig      | 6102.00 RP2          |  | 10.79               | 0.88           | -0.16           |
| 50003.00 C17        | M-003025- ribosomal p        | 6195.00 RPS6KA1      |  | 7.05                | 4.62           | -0.86           |
| 50003.00 C19        | M-004663- ribosomal p        | 6196.00 RPS6KA2      |  | 18.99               | 7.32           | 1.36            |
| 50003.00 C21        | M-003026- ribosomal p        | 6197.00 RPS6KA3      |  | 22.11               | 10.44          | 1.95            |
| 50003.00 C23        | M-004664- ribosomal p        | 8986.00 RPS6KA4      |  | 16.54               | 4.87           | 0.91            |
| 50003.00 E04        | M-005398- zeta-chain         | 7535.00 ZAP70        |  | 9.64                | 2.03           | -0.38           |
| 50003.00 E05        | M-004665- ribosomal p        | 9252.00 RPS6KA5      |  | 12.47               | 0.80           | 0.15            |
| 50003.00 E06        | M-005068- sterile alph       | 51776.00 ZAK         |  | 13.75               | 2.08           | 0.39            |
| 50003.00 E07        | M-004670- ribosomal p        | 27330.00 RPS6KA6     |  | 7.51                | 4.16           | -0.78           |
| 50003.00 E08        | M-012329- tyrosine 3-i       | 10971.00 YWHAQ       |  | 3.49                | 8.18           | -1.53           |
| 50003.00 E09        | M-003616- ribosomal p        | 6198.00 RPS6KB1      |  | 9.64                | 2.03           | -0.38           |
| 50003.00 E10        | M-010626- tyrosine 3-i       | 7533.00 YWHAH        |  | 12.68               | 1.01           | 0.19            |
| 50003.00 E11        | M-004671- ribosomal p        | 6199.00 RPS6KB2      |  | 11.58               | 0.09           | -0.02           |
| 50003.00 E12        | M-003184- v-yes-1 Yar        | 7525.00 YES1         |  | 9.69                | 1.98           | -0.37           |
| 50003.00 E13        | M-005371- ribosomal p        | 26750.00 RPS6KC1     |  | 17.29               | 5.62           | 1.05            |
| 50003.00 E14        | M-006793- xylulokinas        | 9942.00 XYLB         |  | 13.99               | 2.32           | 0.43            |
| 50003.00 E15        | M-005372- ribosomal p        | 83694.00 RPS6KL1     |  | 9.09                | 2.58           | -0.48           |
| 50003.00 E16        | M-012386- WNT inhibi         | 11197.00 WIF1        |  | 11.16               | 0.51           | -0.10           |
| 50003.00 E17        | M-003174- RYK recept         | 6259.00 RYK          |  | 11.22               | 0.45           | -0.08           |
| 50003.00 E18        | M-005050- WEE1 hom           | 7465.00 WEE1         |  | 14.89               | 3.22           | 0.60            |
| 50003.00 E19        | M-004672- microtubul         | 22983.00 MAST1       |  | 22.01               | 10.34          | 1.93            |
| 50003.00 E20        | M-005397- vaccinia rel       | 51231.00 VRK3        |  | 13.32               | 1.65           | 0.31            |
| 50003.00 E21        | M-011505- src kinase a       | 8631.00 SKAP1        |  | 17.80               | 6.13           | 1.14            |
| 50003.00 E23        | M-005373- SCY1-like 1        | 57410.00 SCYL1       |  | 7.67                | 4.00           | -0.75           |
| 50003.00 G02        | M-004684- vaccinia rel       | 7444.00 VRK2         |  | 4.59                | 7.08           | -1.32           |
| 50003.00 G04        | M-004683- vaccinia rel       | 7443.00 VRK1         |  | 16.48               | 4.81           | 0.90            |
| 50003.00 G05        | M-007737- selenophos         | 22929.00 SEPHS1      |  | 11.37               | 0.30           | -0.06           |
| 50003.00 G06        | M-006792- uridine-cyt        | 54963.00 UCKL1       |  | 8.47                | 3.20           | -0.60           |
| 50003.00 G07        | M-003027- serum/gluc         | 6446.00 SGK1         |  | 16.21               | 4.54           | 0.85            |
| <b>50003.00 G08</b> | <b>M-005077- uridine-cyt</b> | <b>7371.00 UCK2</b>  |  | <b><u>25.67</u></b> | <b>14.00</b>   | <b>2.61</b>     |
| 50003.00 G09        | M-004673- serum/gluc         | 10110.00 SGK2        |  | 16.50               | 4.83           | 0.90            |

|              |                        |                   |              |              |       |
|--------------|------------------------|-------------------|--------------|--------------|-------|
| 50003.00 G10 | M-004059- cytidylate k | 51727.00 CMPK     | 20.28        | 8.61         | 1.61  |
| 50003.00 G11 | M-004162- serum/gluc   | 23678.00 SGK3     | 18.37        | 6.70         | 1.25  |
| 50003.00 G12 | M-005396- unc-51-like  | 9706.00 ULK2      | 17.22        | 5.55         | 1.03  |
| 50003.00 G13 | M-018841- SHC (Src hc  | 6464.00 SHC1      | 17.20        | 5.53         | 1.03  |
| 50003.00 G14 | M-005049- unc-51-like  | 8408.00 ULK1      | <u>23.08</u> | <b>11.41</b> | 2.13  |
| 50003.00 G15 | M-004778- SNF1-like k  | 23235.00 SNF1LK2  | 11.34        | 0.33         | -0.06 |
| 50003.00 G16 | M-007739- UDP-glucos   | 7360.00 UGP2      | 23.63        | <b>11.96</b> | 2.23  |
| 50003.00 G17 | M-003850- STE20-like   | 9748.00 SLK       | 13.05        | 1.38         | 0.26  |
| 50003.00 G18 | M-004062- uridine-cyt  | 83549.00 UCK1     | 16.90        | 5.23         | 0.97  |
| 50003.00 G19 | M-005033- PI-3-kinase  | 23049.00 SMG1     | 14.56        | 2.89         | 0.54  |
| 50003.00 G20 | M-003183- TYRO3 prot   | 7301.00 TYRO3     | 25.97        | <b>14.30</b> | 2.67  |
| 50003.00 G21 | M-005374- NUAK fami    | 81788.00 NUAK2    | 9.43         | 2.24         | -0.42 |
| 50003.00 G23 | M-003959- SNF1-like k  | 150094.00 SNF1LK  | 15.72        | 4.05         | 0.75  |
| 50003.00 I02 | M-003182- tyrosine kir | 7297.00 TYK2      | <u>26.84</u> | <b>15.17</b> | 2.83  |
| 50003.00 I04 | M-006791- thioredoxir  | 51314.00 TXNDC3   | 8.41         | 3.26         | -0.61 |
| 50003.00 I05 | M-003325- polo-like ki | 10769.00 PLK2     | 5.22         | 6.45         | -1.20 |
| 50003.00 I06 | M-003181- TXK tyrosin  | 7294.00 TXK       | 6.11         | 5.56         | -1.04 |
| 50003.00 I07 | M-004322- SNF relatec  | 54861.00 SNRK     | 10.48        | 1.19         | -0.22 |
| 50003.00 I08 | M-005395- titin        | 7273.00 TTN       | 11.67        | 0.00         | 0.00  |
| 50003.00 I09 | M-011511- suppressor   | 8651.00 SOCS1     | 7.95         | 3.72         | -0.70 |
| 50003.00 I10 | M-004105- TTK proteir  | 7272.00 TTK       | 11.83        | 0.16         | 0.03  |
| 50003.00 I11 | M-017374- suppressor   | 9655.00 SOCS5     | 5.19         | 6.48         | -1.21 |
| 50003.00 I12 | M-004682- tau tubulin  | 146057.00 TTBK2   | 8.61         | 3.06         | -0.57 |
| 50003.00 I13 | M-007677- sperm autc   | 53340.00 SPA17    | 10.40        | 1.27         | -0.24 |
| 50003.00 I14 | M-004680- tau tubulin  | 84630.00 TTBK1    | <u>27.32</u> | <b>15.65</b> | 2.92  |
| 50003.00 I15 | M-020826- CDC42 sma    | 56990.00 CDC42SE2 | 13.82        | 2.15         | 0.40  |
| 50003.00 I16 | M-013077- testis-speci | 60385.00 TSKS     | 2.66         | 9.01         | -1.68 |
| 50003.00 I17 | M-004172- sphingosin   | 8877.00 SPHK1     | 8.81         | 2.86         | -0.53 |
| 50003.00 I18 | M-005393- transient re | 54822.00 TRPM7    | 17.82        | 6.15         | 1.15  |
| 50003.00 I19 | M-004831- sphingosin   | 56848.00 SPHK2    | 15.76        | 4.09         | 0.76  |
| 50003.00 I20 | M-005048- transient re | 140803.00 TRPM6   | 8.28         | 3.39         | -0.63 |
| 50003.00 I21 | M-007738- selenophos   | 22928.00 SEPHS2   | <u>25.83</u> | <b>14.16</b> | 2.64  |
| 50003.00 I23 | M-010230- sequestosc   | 8878.00 SQSTM1    | 14.62        | 2.95         | 0.55  |
| 50003.00 K02 | M-005047- triple funct | 7204.00 TRIO      | 6.90         | 4.77         | -0.89 |
| 50003.00 K04 | M-020821- T cell recep | 50852.00 TRAT1    | 8.98         | 2.69         | -0.50 |
| 50003.00 K05 | M-003175- v-src sarcoi | 6714.00 SRC       | 8.05         | 3.62         | -0.68 |
| 50003.00 K06 | M-005391- tribbles ho  | 28951.00 TRIB2    | 7.96         | 3.71         | -0.69 |
| 50003.00 K07 | M-005376- src-related  | 6725.00 SRMS      | 14.61        | 2.94         | 0.55  |
| 50003.00 K08 | M-005045- serine/thre  | 11139.00 TRAD     | 3.61         | 8.06         | -1.50 |
| 50003.00 K09 | M-003982- SFRS protei  | 6732.00 SRPK1     | 6.80         | 4.87         | -0.91 |
| 50003.00 K10 | M-006789- thiamin py   | 27010.00 TPK1     | 8.49         | 3.18         | -0.59 |
| 50003.00 K11 | M-004839- SFRS protei  | 6733.00 SRPK2     | 9.87         | 1.80         | -0.34 |
| 50003.00 K12 | M-005390- PDZ bindin   | 55872.00 PBK      | 14.96        | 3.29         | 0.61  |
| 50003.00 K13 | M-007290- abl-interac  | 10006.00 ABI1     | 13.56        | 1.89         | 0.35  |
| 50003.00 K14 | M-003180- tyrosine kir | 8711.00 TNK1      | 11.56        | 0.11         | -0.02 |
| 50003.00 K15 | M-005034- testis-speci | 83983.00 TSSK6    | 9.19         | 2.48         | -0.46 |
| 50003.00 K16 | M-008090- tumor necr   | 8797.00 TNFRSF10A | 4.59         | 7.08         | -1.32 |

|              |                         |           |        |       |       |       |
|--------------|-------------------------|-----------|--------|-------|-------|-------|
| 50003.00 K17 | M-004168- serine/thre   | 6793.00   | STK10  | 12.34 | 0.67  | 0.12  |
| 50003.00 K18 | M-005156- toll-like rec | 10333.00  | TLR6   | 20.24 | 8.57  | 1.60  |
| 50003.00 K19 | M-005035- serine/thre   | 6794.00   | STK11  | 8.63  | 3.04  | -0.57 |
| 50003.00 K20 | M-008088- toll-like rec | 7099.00   | TLR4   | 11.81 | 0.14  | 0.03  |
| 50003.00 K21 | M-004054- serine/thre   | 8576.00   | STK16  | 9.49  | 2.18  | -0.41 |
| 50003.00 K23 | M-005377- serine/thre   | 9263.00   | STK17A | 8.52  | 3.15  | -0.59 |
| 50003.00 M02 | M-007745- toll-like rec | 7098.00   | TLR3   | 7.67  | 4.00  | -0.75 |
| 50003.00 M04 | M-008086- toll-like rec | 7096.00   | TLR1   | 16.23 | 4.56  | 0.85  |
| 50003.00 M05 | M-004051- serine/thre   | 9262.00   | STK17B | 12.24 | 0.57  | 0.11  |
| 50003.00 M06 | M-005389- tousled-like  | 11011.00  | TLK2   | 5.96  | 5.71  | -1.07 |
| 50003.00 M07 | M-005036- polo-like ki  | 10733.00  | PLK4   | 9.50  | 2.17  | -0.41 |
| 50003.00 M08 | M-004174- tousled-like  | 9874.00   | TLK1   | 12.82 | 1.15  | 0.21  |
| 50003.00 M09 | M-005378- serine/thre   | 8859.00   | STK19  | 11.52 | 0.15  | -0.03 |
| 50003.00 M10 | M-006788- thymidine l   | 7084.00   | TK2    | 19.74 | 8.07  | 1.50  |
| 50003.00 M11 | M-005379- testis-speci  | 23617.00  | TSSK2  | 9.07  | 2.60  | -0.49 |
| 50003.00 M12 | M-006787- thymidine l   | 7083.00   | TK1    | 14.09 | 2.42  | 0.45  |
| 50003.00 M13 | M-004050- testis-speci  | 81629.00  | TSSK3  | 28.12 | 16.45 | 3.07  |
| 50003.00 M14 | M-009932- tight juncti  | 9414.00   | TJP2   | 16.67 | 5.00  | 0.93  |
| 50003.00 M15 | M-005038- testis-speci  | 83942.00  | TSSK1B | 5.71  | 5.96  | -1.11 |
| 50003.00 M16 | M-003179- tyrosine kir  | 7075.00   | TIE1   | 14.54 | 2.87  | 0.53  |
| 50003.00 M17 | M-004840- SFRS protei   | 26576.00  | SRPK3  | 25.87 | 14.20 | 2.65  |
| 50003.00 M18 | M-003930- transformii   | 7048.00   | TGFBR2 | 12.58 | 0.91  | 0.17  |
| 50003.00 M19 | M-004872- serine/thre   | 8428.00   | STK24  | 12.62 | 0.95  | 0.18  |
| 50003.00 M20 | M-003929- transformii   | 7046.00   | TGFBR1 | 38.38 | 26.71 | 4.98  |
| 50003.00 M21 | M-004873- serine/thre   | 10494.00  | STK25  | 12.78 | 1.11  | 0.21  |
| 50003.00 M23 | M-005381- BR serine/t   | 9024.00   | BRSK2  | 16.03 | 4.36  | 0.81  |
| 50003.00 O02 | M-005386- testis expre  | 56155.00  | TEX14  | 3.73  | 7.94  | -1.48 |
| 50003.00 O04 | M-005044- testis-speci  | 10420.00  | TESK2  | 14.23 | 2.56  | 0.48  |
| 50003.00 O05 | M-004874- serine/thre   | 6788.00   | STK3   | 10.98 | 0.69  | -0.13 |
| 50003.00 O06 | M-005043- testis-speci  | 7016.00   | TESK1  | 4.65  | 7.02  | -1.31 |
| 50003.00 O07 | M-005382- serine/thre   | 56164.00  | STK31  | 9.45  | 2.22  | -0.42 |
| 50003.00 O08 | M-003178- TEK tyrosin   | 7010.00   | TEK    | 18.75 | 7.08  | 1.32  |
| 50003.00 O09 | M-005383- serine/thre   | 65975.00  | STK33  | 10.93 | 0.74  | -0.14 |
| 50003.00 O10 | M-003177- tec protein   | 7006.00   | TEC    | 19.98 | 8.31  | 1.55  |
| 50003.00 O11 | M-005384- serine/thre   | 140901.00 | STK35  | 22.30 | 10.63 | 1.98  |
| 50003.00 O12 | M-003788- TANK-bindi    | 29110.00  | TBK1   | 16.18 | 4.51  | 0.84  |
| 50003.00 O13 | M-005039- serine/thre   | 27148.00  | STK36  | 15.30 | 3.63  | 0.68  |
| 50003.00 O14 | M-004171- TAO kinase    | 9344.00   | TAOK2  | 5.24  | 6.43  | -1.20 |
| 50003.00 O15 | M-004674- serine/thre   | 11329.00  | STK38  | 7.55  | 4.12  | -0.77 |
| 50003.00 O16 | M-005385- TAF1 RNA p    | 138474.00 | TAF1L  | 9.66  | 2.01  | -0.38 |
| 50003.00 O17 | M-003313- serine/thre   | 23012.00  | STK38L | 11.61 | 0.06  | -0.01 |
| 50003.00 O18 | M-005041- TAF1 RNA p    | 6872.00   | TAF1   | 8.98  | 2.69  | -0.50 |
| 50003.00 O19 | M-004875- serine thre   | 27347.00  | STK39  | 11.54 | 0.13  | -0.02 |
| 50003.00 O20 | M-003176- spleen tyro   | 6850.00   | SYK    | 12.14 | 0.47  | 0.09  |
| 50003.00 O21 | M-004157- serine/thre   | 6789.00   | STK4   | 6.33  | 5.34  | -1.00 |
| 50003.00 O23 | M-003545- aurora kina   | 6790.00   | AURKA  | 9.78  | 1.89  | -0.35 |
|              |                         |           |        | 11.67 | 3.62  |       |

|              |                                              | 3MAD  | 10.87 |
|--------------|----------------------------------------------|-------|-------|
|              |                                              | MADc  | 5.36  |
| 50003.00 C22 |                                              | 61.59 | 44.54 |
| 50003.00 D22 |                                              | 48.51 | 51.06 |
| 50003.00 E22 |                                              | 63.62 | 48.21 |
| 50003.00 F22 |                                              | 52.96 | 53.30 |
|              | mn                                           | 56.67 | 49.28 |
|              | sd                                           | 7.14  | 3.78  |
| 50003.00 G22 |                                              | 11.92 | 9.90  |
| 50003.00 H22 |                                              | 5.87  | 9.67  |
| 50003.00 I22 |                                              | 7.83  | 8.15  |
| 50003.00 J22 |                                              | 6.12  | 9.68  |
|              | mn                                           | 7.94  | 9.35  |
|              | sd                                           | 2.80  | 0.81  |
|              | 3psSD                                        | 21.42 | 11.34 |
|              | 3ngSD                                        | 8.39  | 2.42  |
|              | SumSD                                        | 29.81 | 13.77 |
|              | MeanDf                                       | 48.74 | 39.93 |
|              | SumovrMn                                     | 0.61  | 0.34  |
|              | 1minus                                       | 0.39  | 0.66  |
| 50003.00 G03 | M-003290- polo-like kinase 1 (Dros PLK1 SMAF | 24.40 | 27.25 |
| 50003.00 H03 | M-003290- polo-like kinase 1 (Dros PLK1 SMAF | 20.55 | 25.17 |
| 50003.00 I03 | D-001206-:siControl non-targeting            | 12.78 | 13.11 |
| 50003.00 J03 | D-001206-:siControl non-targeting            | 10.88 | 10.45 |

| <u>% inf</u> | <u>abs dev</u> | <u>robust Z</u> | <u>% inf</u> | <u>abs dev</u> | <u>robust Z</u> |
|--------------|----------------|-----------------|--------------|----------------|-----------------|
| 11.01        | 2.23           | 0.48            | 3.87         | 4.42           | -1.00           |
| 8.56         | 0.22           | -0.05           | 4.99         | 3.30           | -0.74           |
| 9.96         | 1.18           | 0.26            | 5.14         | 3.15           | -0.71           |
| 8.18         | 0.60           | -0.13           | 10.94        | 2.65           | 0.60            |
| 8.37         | 0.41           | -0.09           | 5.13         | 3.16           | -0.71           |
| 13.34        | 4.56           | 0.99            | 17.18        | 8.89           | 2.00            |
| 5.20         | 3.58           | -0.78           | 5.07         | 3.23           | -0.73           |
| 7.60         | 1.18           | -0.26           | 5.14         | 3.15           | -0.71           |
| 8.78         | 0.00           | 0.00            | 7.40         | 0.89           | -0.20           |
| 5.08         | 3.70           | -0.80           | 10.23        | 1.94           | 0.44            |
| <u>23.35</u> | <b>14.57</b>   | 3.17            | <u>28.20</u> | <b>19.91</b>   | 4.49 y          |
| 6.51         | 2.27           | -0.49           | 6.62         | 1.67           | -0.38           |
| 7.64         | 1.14           | -0.25           | 5.22         | 3.07           | -0.69           |
| 9.82         | 1.04           | 0.23            | 4.10         | 4.19           | -0.94           |
| 4.50         | 4.28           | -0.93           | 5.97         | 2.32           | -0.52           |
| 9.06         | 0.28           | 0.06            | 8.32         | 0.03           | 0.01            |
| 4.92         | 3.86           | -0.84           | 4.65         | 3.64           | -0.82           |
| 10.22        | 1.44           | 0.31            | 15.76        | 7.47           | 1.68            |
| 15.62        | 6.84           | 1.49            | 23.14        | <b>14.85</b>   | 3.35            |
| 16.77        | 7.99           | 1.74            | 9.17         | 0.88           | 0.20            |
| 11.62        | 2.84           | 0.62            | 7.82         | 0.47           | -0.11           |
| 8.32         | 0.46           | -0.10           | 8.09         | 0.20           | -0.04           |
| 14.55        | 5.77           | 1.25            | 8.43         | 0.14           | 0.03            |
| 6.02         | 2.76           | -0.60           | 5.48         | 2.81           | -0.63           |
| 5.67         | 3.11           | -0.68           | 1.71         | 6.58           | -1.48           |
| 10.08        | 1.30           | 0.28            | 4.57         | 3.72           | -0.84           |
| 9.31         | 0.53           | 0.11            | 6.60         | 1.69           | -0.38           |
| 5.14         | 3.64           | -0.79           | 7.31         | 0.98           | -0.22           |
| 6.54         | 2.24           | -0.49           | 12.80        | 4.51           | 1.02            |
| 7.59         | 1.19           | -0.26           | 10.67        | 2.38           | 0.54            |
| 6.85         | 1.93           | -0.42           | 5.24         | 3.05           | -0.69           |
| 7.51         | 1.27           | -0.28           | 4.93         | 3.36           | -0.76           |
| 3.45         | 5.33           | -1.16           | 4.84         | 3.45           | -0.78           |
| 5.67         | 3.11           | -0.68           | 7.04         | 1.25           | -0.28           |
| 20.60        | <b>11.82</b>   | 2.57            | 7.24         | 1.05           | -0.24           |
| 6.64         | 2.14           | -0.47           | 10.09        | 1.80           | 0.41            |
| 4.33         | 4.45           | -0.97           | 5.05         | 3.24           | -0.73           |
| 5.59         | 3.19           | -0.69           | 13.16        | 4.87           | 1.10            |
| 4.77         | 4.01           | -0.87           | 8.46         | 0.17           | 0.04            |
| 11.41        | 2.63           | 0.57            | 5.15         | 3.14           | -0.71           |
| 7.84         | 0.94           | -0.20           | 7.86         | 0.43           | -0.10           |
| 11.89        | 3.11           | 0.68            | 8.52         | 0.23           | 0.05            |
| 10.79        | 2.01           | 0.44            | 7.12         | 1.17           | -0.26           |
| 15.05        | 6.27           | 1.37            | 7.49         | 0.80           | -0.18           |
| <u>19.26</u> | <b>10.48</b>   | 2.28            | <u>8.49</u>  | 0.20           | 0.05 y          |
| 12.28        | 3.50           | 0.76            | 6.99         | 1.30           | -0.29           |



|              |              |       |              |              |        |
|--------------|--------------|-------|--------------|--------------|--------|
| 19.36        | <b>10.58</b> | 2.30  | 16.65        | 8.36         | 1.88   |
| 11.33        | 2.55         | 0.56  | 9.66         | 1.37         | 0.31   |
| 14.55        | 5.77         | 1.26  | 7.63         | 0.66         | -0.15  |
| 13.25        | 4.47         | 0.97  | 5.53         | 2.76         | -0.62  |
| <u>21.07</u> | <b>12.29</b> | 2.68  | <u>19.63</u> | <b>11.34</b> | 2.56 y |
| 8.67         | 0.11         | -0.02 | 4.98         | 3.31         | -0.75  |
| 15.66        | 6.88         | 1.50  | 11.95        | 3.66         | 0.83   |
| 10.03        | 1.25         | 0.27  | 5.52         | 2.78         | -0.63  |
| 11.13        | 2.35         | 0.51  | 17.41        | <b>9.12</b>  | 2.06   |
| 9.74         | 0.96         | 0.21  | 9.39         | 1.10         | 0.25   |
| 13.71        | 4.93         | 1.07  | 14.72        | 6.43         | 1.45   |
| 6.13         | 2.65         | -0.58 | 8.29         | 0.00         | 0.00   |
| 12.38        | 3.60         | 0.78  | 5.18         | 3.11         | -0.70  |
| <u>20.56</u> | <b>11.78</b> | 2.56  | <u>30.12</u> | <b>21.83</b> | 4.92 y |
| 7.26         | 1.52         | -0.33 | 14.03        | 5.74         | 1.30   |
| 11.89        | 3.11         | 0.68  | 9.70         | 1.41         | 0.32   |
| 14.45        | 5.67         | 1.23  | 12.35        | 4.06         | 0.91   |
| 7.85         | 0.93         | -0.20 | 15.37        | 7.08         | 1.60   |
| 11.08        | 2.30         | 0.50  | 13.94        | 5.65         | 1.28   |
| 6.97         | 1.81         | -0.39 | 13.34        | 5.05         | 1.14   |
| 15.37        | 6.59         | 1.43  | 11.79        | 3.50         | 0.79   |
| 11.98        | 3.20         | 0.70  | 9.70         | 1.41         | 0.32   |
| 6.58         | 2.20         | -0.48 | 8.01         | 0.28         | -0.06  |
| 9.79         | 1.01         | 0.22  | 9.07         | 0.78         | 0.18   |
| <u>19.49</u> | <b>10.71</b> | 2.33  | <u>24.96</u> | <b>16.67</b> | 3.76 y |
| 5.77         | 3.01         | -0.65 | 11.93        | 3.64         | 0.82   |
| 5.67         | 3.11         | -0.68 | 6.81         | 1.48         | -0.33  |
| 10.71        | 1.93         | 0.42  | 6.23         | 2.06         | -0.46  |
| <u>22.51</u> | <b>13.73</b> | 2.99  | <u>23.04</u> | <b>14.75</b> | 3.33 y |
| 14.91        | 6.13         | 1.33  | 17.95        | <b>9.66</b>  | 2.18   |
| 5.58         | 3.20         | -0.70 | 8.87         | 0.58         | 0.13   |
| <u>17.42</u> | <b>8.64</b>  | 1.88  | <u>25.56</u> | <b>17.27</b> | 3.89 y |
| 8.07         | 0.71         | -0.16 | 11.21        | 2.92         | 0.66   |
| 2.01         | 6.77         | -1.47 | 7.44         | 0.85         | -0.19  |
| 14.10        | 5.32         | 1.16  | 25.52        | <b>17.23</b> | 3.88   |
| 2.04         | 6.74         | -1.47 | 4.77         | 3.52         | -0.79  |
| 5.82         | 2.96         | -0.64 | 7.25         | 1.04         | -0.23  |
| 5.53         | 3.25         | -0.71 | 4.57         | 3.73         | -0.84  |
| 5.64         | 3.14         | -0.68 | 5.89         | 2.40         | -0.54  |
| 3.83         | 4.95         | -1.08 | 12.47        | 4.18         | 0.94   |
| 2.66         | 6.12         | -1.33 | 12.20        | 3.91         | 0.88   |
| 6.08         | 2.70         | -0.59 | 7.96         | 0.33         | -0.07  |
| 10.43        | 1.65         | 0.36  | 6.27         | 2.02         | -0.45  |
| 3.40         | 5.38         | -1.17 | 5.70         | 2.59         | -0.58  |
| 12.09        | 3.31         | 0.72  | 14.25        | 5.96         | 1.34   |
| 6.56         | 2.22         | -0.48 | 9.65         | 1.36         | 0.31   |
| 2.93         | 5.85         | -1.27 | 9.91         | 1.62         | 0.37   |

|             |              |       |              |              |        |
|-------------|--------------|-------|--------------|--------------|--------|
| 6.85        | 1.93         | -0.42 | 12.20        | 3.91         | 0.88   |
| 11.93       | 3.15         | 0.68  | 15.11        | 6.82         | 1.54   |
| 8.97        | 0.19         | 0.04  | 10.32        | 2.03         | 0.46   |
| 8.31        | 0.47         | -0.10 | 11.24        | 2.95         | 0.67   |
| 8.79        | 0.01         | 0.00  | 12.31        | 4.02         | 0.91   |
| 13.51       | 4.73         | 1.03  | 15.86        | 7.57         | 1.71   |
| 1.56        | 7.22         | -1.57 | 1.42         | 6.87         | -1.55  |
| 6.39        | 2.39         | -0.52 | 10.25        | 1.96         | 0.44   |
| 2.96        | 5.82         | -1.27 | 4.96         | 3.33         | -0.75  |
| 2.49        | 6.29         | -1.37 | 5.29         | 3.00         | -0.68  |
| 2.25        | 6.53         | -1.42 | 6.53         | 1.77         | -0.40  |
| 5.79        | 2.99         | -0.65 | 7.52         | 0.77         | -0.17  |
| 3.28        | 5.50         | -1.20 | 2.56         | 5.73         | -1.29  |
| 6.28        | 2.50         | -0.54 | 5.23         | 3.06         | -0.69  |
| 2.87        | 5.91         | -1.29 | 2.23         | 6.06         | -1.37  |
| 3.12        | 5.66         | -1.23 | 3.13         | 5.16         | -1.16  |
| 11.92       | 3.14         | 0.68  | 7.94         | 0.35         | -0.08  |
| 4.60        | 4.18         | -0.91 | 9.75         | 1.46         | 0.33   |
| 5.51        | 3.27         | -0.71 | 5.99         | 2.30         | -0.52  |
| 3.00        | 5.78         | -1.26 | 7.68         | 0.61         | -0.14  |
| 11.09       | 2.31         | 0.50  | 11.94        | 3.65         | 0.82   |
| 5.67        | 3.11         | -0.68 | 6.65         | 1.64         | -0.37  |
| 6.43        | 2.35         | -0.51 | 5.26         | 3.03         | -0.68  |
| <b>7.98</b> | <b>0.80</b>  | -0.17 | <u>25.09</u> | <b>16.80</b> | 3.79 y |
| 12.25       | 3.47         | 0.76  | 17.33        | <b>9.04</b>  | 2.04   |
| 9.92        | 1.14         | 0.25  | 9.16         | 0.87         | 0.20   |
| 5.78        | 3.00         | -0.65 | 0.82         | 7.47         | -1.68  |
| 5.85        | 2.93         | -0.64 | 3.06         | 5.23         | -1.18  |
| 9.76        | 0.98         | 0.21  | 9.60         | 1.31         | 0.30   |
| 7.52        | 1.26         | -0.28 | 8.34         | 0.05         | 0.01   |
| 9.04        | 0.26         | 0.06  | 4.14         | 4.15         | -0.94  |
| 14.75       | 5.97         | 1.30  | 9.14         | 0.85         | 0.19   |
| 13.03       | 4.25         | 0.92  | 7.51         | 0.78         | -0.18  |
| 7.72        | 1.06         | -0.23 | 9.38         | 1.09         | 0.25   |
| 13.42       | 4.64         | 1.01  | 6.76         | 1.53         | -0.35  |
| 17.27       | 8.49         | 1.85  | 10.83        | 2.54         | 0.57   |
| 16.56       | 7.78         | 1.69  | 8.96         | 0.67         | 0.15   |
| 8.54        | 0.24         | -0.05 | 7.12         | 1.17         | -0.26  |
| 10.64       | 1.86         | 0.41  | 4.96         | 3.33         | -0.75  |
| 8.80        | 0.02         | 0.01  | 7.02         | 1.27         | -0.29  |
| 9.35        | 0.57         | 0.12  | 11.27        | 2.98         | 0.67   |
| 9.57        | 0.79         | 0.17  | 13.29        | 5.00         | 1.13   |
| 11.25       | 2.47         | 0.54  | 11.29        | 3.00         | 0.68   |
| 19.20       | <b>10.42</b> | 2.27  | 12.78        | 4.49         | 1.01   |
| 9.32        | 0.54         | 0.12  | 7.94         | 0.35         | -0.08  |
| 10.83       | 2.05         | 0.45  | 17.69        | <b>9.40</b>  | 2.12   |
| 8.78        | 3.11         |       | 8.29         | 3.00         |        |

|       |       |       |      |
|-------|-------|-------|------|
| 26.34 | 9.32  | 24.87 | 8.99 |
|       | 4.60  |       | 4.43 |
|       | 57.99 |       |      |
|       | 47.81 |       |      |
|       | 52.50 |       |      |
|       | 53.82 |       |      |
|       | 53.03 |       |      |
|       | 4.19  |       |      |
|       | 3.92  |       |      |
|       | 6.01  |       |      |
|       | 3.48  |       |      |
|       | 11.42 |       |      |
|       | 6.21  |       |      |
|       | 3.65  |       |      |
|       | 12.58 |       |      |
|       | 10.94 |       |      |
|       | 23.51 |       |      |
|       | 46.82 |       |      |
|       | 0.50  |       |      |
|       | 0.50  |       |      |

26.54  
22.73

13.69  
13.89

|                 |            |                                               |                      | <u>% inf</u> | <u>abs dev</u> |
|-----------------|------------|-----------------------------------------------|----------------------|--------------|----------------|
| 50004.00        | A02        | M-016036- guanine nucleotide binding p        | 2791.00 GNG11        | 3.81         | 6.13           |
| 50004.00        | A04        | M-017238- guanine nucleotide binding p        | 59345.00 GNB4        | 3.37         | 6.57           |
| 50004.00        | A05        | M-005413- adenylate cyclase activating        | 117.00 ADCYAP1R      | 8.36         | 1.58           |
| 50004.00        | A06        | M-011671- guanine nucleotide binding p        | 2784.00 GNB3         | 6.42         | 3.52           |
| 50004.00        | A07        | M-005414- adrenomedullin receptor             | 11318.00 ADMR        | 4.92         | 5.02           |
| 50004.00        | A08        | M-017242- guanine nucleotide binding p        | 2782.00 GNB1         | 17.74        | 7.80           |
| 50004.00        | A09        | M-005415- adenosine A1 receptor               | 134.00 ADORA1        | 9.12         | 0.82           |
| <b>50004.00</b> | <b>A10</b> | <b>M-010405- guanine nucleotide binding p</b> | <b>2781.00 GNAZ</b>  | <b>21.99</b> | <b>12.05</b>   |
| 50004.00        | A11        | M-005416- adenosine A2a receptor              | 135.00 ADORA2A       | 10.49        | 0.55           |
| 50004.00        | A12        | M-010408- guanine nucleotide binding p        | 2780.00 GNAT2        | 8.13         | 1.81           |
| 50004.00        | A13        | M-005417- adenosine A2b receptor              | 136.00 ADORA2B       | 13.99        | 4.05           |
| 50004.00        | A14        | M-009827- guanine nucleotide binding p        | 2779.00 GNAT1        | 11.11        | 1.17           |
| 50004.00        | A15        | M-005418- adenosine A3 receptor               | 140.00 ADORA3        | 6.33         | 3.61           |
| 50004.00        | A16        | M-010825- GNAS complex locus                  | 2778.00 GNAS         | 4.18         | 5.76           |
| 50004.00        | A17        | M-005419- adrenergic, alpha-1A-, recept       | 148.00 ADRA1A        | 12.69        | 2.75           |
| 50004.00        | A18        | M-008562- guanine nucleotide binding p        | 2776.00 GNAQ         | 7.68         | 2.26           |
| 50004.00        | A19        | M-005420- adrenergic, alpha-1B-, recept       | 147.00 ADRA1B        | 10.51        | 0.57           |
| 50004.00        | A20        | M-009486- guanine nucleotide binding p        | 2775.00 GNAO1        | 3.69         | 6.25           |
| 50004.00        | A21        | M-005421- adrenergic, alpha-1D-, recept       | 146.00 ADRA1D        | 2.95         | 6.99           |
| 50004.00        | A23        | M-005422- adrenergic, alpha-2A-, recept       | 150.00 ADRA2A        | 5.53         | 4.41           |
| 50004.00        | B02        | M-005650- latrophilin 1                       | 22859.00 LPHN1       | 0.77         | 9.17           |
| 50004.00        | B04        | M-008400- similar to POSSIBLE GUSTATC         | 115131.00 LOC115131  | 0.53         | 9.41           |
| 50004.00        | B05        | M-020575- guanine nucleotide binding p        | 55970.00 GNG12       | 1.47         | 8.47           |
| 50004.00        | B06        | M-003681- luteinizing hormone/choriog         | 3973.00 LHCGR        | 2.50         | 7.44           |
| 50004.00        | B07        | M-012804- guanine nucleotide binding p        | 2785.00 GNG3         | 1.28         | 8.66           |
| 50004.00        | B08        | M-005649- relaxin/insulin-like family pe      | 59350.00 RXFP1       | 3.02         | 6.92           |
| 50004.00        | B09        | M-017066- guanine nucleotide binding p        | 2786.00 GNG4         | 5.15         | 4.80           |
| 50004.00        | B10        | M-004092- G-protein signalling modulati       | 29899.00 GPSM2       | 7.61         | 2.33           |
| 50004.00        | B11        | M-012699- guanine nucleotide binding p        | 2787.00 GNG5         | 3.56         | 6.38           |
| 50004.00        | B12        | M-012166- LanC lantibiotic synthetase c       | 10314.00 LANCL1      | 2.34         | 7.60           |
| 50004.00        | B13        | M-019807- guanine nucleotide binding p        | 2788.00 GNG7         | 4.53         | 5.41           |
| 50004.00        | B14        | M-006253- potassium inwardly-rectifyin        | 3765.00 KCNJ9        | 5.78         | 4.16           |
| 50004.00        | B15        | M-005517- gonadotropin-releasing horr         | 2798.00 GNRHR        | 3.18         | 6.76           |
| 50004.00        | B16        | M-006251- potassium inwardly-rectifyin        | 3763.00 KCNJ6        | 16.22        | 6.28           |
| 50004.00        | B17        | M-005518- gonadotropin-releasing horr         | 114814.00 GNRHR2     | 11.43        | 1.49           |
| 50004.00        | B18        | M-006250- potassium inwardly-rectifyin        | 3762.00 KCNJ5        | 2.32         | 7.62           |
| 50004.00        | B19        | M-005519- G protein-coupled bile acid r       | 151306.00 GPBAR1     | 10.41        | 0.47           |
| 50004.00        | B20        | M-006248- potassium inwardly-rectifyin        | 3760.00 KCNJ3        | 1.63         | 8.31           |
| 50004.00        | B21        | M-005521- G protein-coupled receptor 1        | 139760.00 GPR119     | 6.00         | 3.94           |
| 50004.00        | B23        | M-005522- G protein-coupled receptor 1        | 11245.00 GPR176      | 12.82        | 2.88           |
| 50004.00        | C02        | M-005184- guanine nucleotide binding p        | 2773.00 GNAI3        | 0.95         | 8.99           |
| <b>50004.00</b> | <b>C04</b> | <b>M-010404- guanine nucleotide binding p</b> | <b>2770.00 GNAI1</b> | <b>6.96</b>  | <b>2.98</b>    |
| 50004.00        | C05        | M-005423- adrenergic, alpha-2B-, recept       | 151.00 ADRA2B        | 3.72         | 6.22           |
| 50004.00        | C06        | M-009327- guanine nucleotide binding p        | 2769.00 GNA15        | 4.00         | 5.94           |
| 50004.00        | C07        | M-005424- adrenergic, alpha-2C-, recept       | 152.00 ADRA2C        | 11.24        | 1.30           |
| 50004.00        | C08        | M-008561- guanine nucleotide binding p        | 9630.00 GNA14        | 6.82         | 3.12           |

|          |     |                                           |           |        |       |       |
|----------|-----|-------------------------------------------|-----------|--------|-------|-------|
| 50004.00 | C09 | M-005425- adrenergic, beta-1-, receptor   | 153.00    | ADRB1  | 9.92  | 0.02  |
| 50004.00 | C10 | M-009948- guanine nucleotide binding p    | 10672.00  | GNA13  | 8.95  | 0.99  |
| 50004.00 | C11 | M-005426- adrenergic, beta-2-, receptor   | 154.00    | ADRB2  | 12.70 | 2.76  |
| 50004.00 | C12 | M-005516- glucagon-like peptide 2 recep   | 9340.00   | GLP2R  | 8.62  | 1.32  |
| 50004.00 | C13 | M-005427- adrenergic, beta-3-, receptor   | 155.00    | ADRB3  | 0.87  | 9.07  |
| 50004.00 | C14 | M-005515- glucagon-like peptide 1 recep   | 2740.00   | GLP1R  | 8.71  | 1.23  |
| 50004.00 | C15 | M-004325- adrenergic, beta, receptor kin  | 156.00    | ADRBK1 | 6.11  | 3.83  |
| 50004.00 | C16 | M-012860- G protein-coupled receptor k    | 9815.00   | GIT2   | 12.95 | 3.01  |
| 50004.00 | C17 | M-004326- adrenergic, beta, receptor kin  | 157.00    | ADRBK2 | 10.80 | 0.86  |
| 50004.00 | C18 | M-020565- G protein-coupled receptor k    | 28964.00  | GIT1   | 10.88 | 0.94  |
| 50004.00 | C19 | M-005428- angiotensin II receptor, type   | 185.00    | AGTR1  | 16.42 | 6.48  |
| 50004.00 | C20 | M-005514- gastric inhibitory polypeptide  | 2696.00   | GIPR   | 12.43 | 2.49  |
| 50004.00 | C21 | M-005429- angiotensin II receptor, type   | 186.00    | AGTR2  | 9.23  | 0.71  |
| 50004.00 | C23 | M-005430- angiotensin II receptor-like 1  | 187.00    | AGTRL1 | 27.37 | 17.43 |
| 50004.00 | D02 | M-008750- olfactory receptor, family 10,  | 144124.00 | OR10A5 | 3.41  | 6.54  |
| 50004.00 | D04 | M-009073- olfactory receptor, family 5, : | 120065.00 | OR5P2  | 5.82  | 4.12  |
| 50004.00 | D05 | M-005523- G protein-coupled receptor 1    | 2825.00   | GPR1   | 10.05 | 0.11  |
| 50004.00 | D06 | M-009061- olfactory receptor, family 5, : | 120066.00 | OR5P3  | 7.19  | 2.75  |
| 50004.00 | D07 | M-005524- prolactin releasing hormone     | 2834.00   | PRLHR  | 7.99  | 1.95  |
| 50004.00 | D08 | M-005647- interleukin 8 receptor, beta    | 3579.00   | IL8RB  | 8.25  | 1.69  |
| 50004.00 | D09 | M-005525- relaxin/insulin-like family pep | 339403.00 | RXFP4  | 6.02  | 3.92  |
| 50004.00 | D10 | M-005646- interleukin 8 receptor, alpha   | 3577.00   | IL8RA  | 4.68  | 5.26  |
| 50004.00 | D11 | M-005526- G protein-coupled receptor 1    | 83550.00  | GPR101 | 3.02  | 6.92  |
| 50004.00 | D12 | M-004756- interleukin 8                   | 3576.00   | IL8    | 7.19  | 2.75  |
| 50004.00 | D13 | M-005527- trace amine associated recep    | 83551.00  | TAAR8  | 6.83  | 3.11  |
| 50004.00 | D14 | M-005644- 5-hydroxytryptamine (seroto     | 3363.00   | HTR7   | 9.95  | 0.01  |
| 50004.00 | D15 | M-005528- purinergic receptor P2Y, G-pi   | 9934.00   | P2RY14 | 4.46  | 5.48  |
| 50004.00 | D16 | M-005643- 5-hydroxytryptamine (seroto     | 3362.00   | HTR6   | 6.82  | 3.12  |
| 50004.00 | D17 | M-005531- G protein-coupled receptor 1    | 266977.00 | GPR110 | 3.49  | 6.45  |
| 50004.00 | D18 | M-005642- 5-hydroxytryptamine (seroto     | 3361.00   | HTR5A  | 4.72  | 5.22  |
| 50004.00 | D19 | M-005532- G protein-coupled receptor 1    | 222611.00 | GPR111 | 6.45  | 3.49  |
| 50004.00 | D20 | M-005641- 5-hydroxytryptamine (seroto     | 3360.00   | HTR4   | 9.33  | 0.61  |
| 50004.00 | D21 | M-005533- G protein-coupled receptor 1    | 139378.00 | GPR112 | 6.08  | 3.87  |
| 50004.00 | D23 | M-005534- G protein-coupled receptor 1    | 165082.00 | GPR113 | 11.86 | 1.92  |
| 50004.00 | E02 | M-005513- growth hormone secretagogu      | 2693.00   | GHSR   | 3.29  | 6.65  |
| 50004.00 | E04 | M-005512- growth hormone releasing ho     | 2692.00   | GHRHR  | 14.52 | 4.58  |
| 50004.00 | E05 | M-003000- v-akt murine thymoma viral c    | 207.00    | AKT1   | 15.53 | 5.59  |
| 50004.00 | E06 | M-005511- glucagon receptor               | 2642.00   | GCGR   | 5.21  | 4.73  |
| 50004.00 | E07 | M-011813- ADP-ribosylation factor-like 3  | 403.00    | ARL3   | 11.14 | 1.20  |
| 50004.00 | E08 | M-017201- glucagon                        | 2641.00   | GCG    | 9.73  | 0.21  |
| 50004.00 | E09 | M-011971- arrestin, beta 1                | 408.00    | ARRB1  | 8.03  | 1.91  |
| 50004.00 | E10 | M-004140- galanin receptor 2              | 8811.00   | GALR2  | 9.64  | 0.30  |
| 50004.00 | E11 | M-003631- arginine vasopressin recepto    | 552.00    | AVPR1A | 8.47  | 1.47  |
| 50004.00 | E12 | M-005509- gamma-aminobutyric acid (G      | 2550.00   | GABBR1 | 18.41 | 8.47  |
| 50004.00 | E13 | M-005431- arginine vasopressin recepto    | 553.00    | AVPR1B | 3.50  | 6.44  |
| 50004.00 | E14 | M-005506- frizzled homolog 9 (Drosophi    | 8326.00   | FZD9   | 7.83  | 2.11  |
| 50004.00 | E15 | M-005432- arginine vasopressin recepto    | 554.00    | AVPR2  | 2.83  | 7.11  |

|          |     |                                          |           |        |       |       |
|----------|-----|------------------------------------------|-----------|--------|-------|-------|
| 50004.00 | E16 | M-003962- frizzled homolog 8 (Drosophi   | 8325.00   | FZD8   | 14.08 | 4.14  |
| 50004.00 | E17 | M-005433- brain-specific angiogenesis ir | 575.00    | BAI1   | 10.23 | 0.29  |
| 50004.00 | E18 | M-003671- frizzled homolog 7 (Drosophi   | 8324.00   | FZD7   | 4.72  | 5.22  |
| 50004.00 | E19 | M-003632- brain-specific angiogenesis ir | 576.00    | BAI2   | 11.56 | 1.62  |
| 50004.00 | E20 | M-005505- frizzled homolog 6 (Drosophi   | 8323.00   | FZD6   | 10.56 | 0.62  |
| 50004.00 | E21 | M-005434- brain-specific angiogenesis ir | 577.00    | BAI3   | 11.74 | 1.80  |
| 50004.00 | E23 | M-005435- bradykinin receptor B1         | 623.00    | BDKRB1 | 13.07 | 3.13  |
| 50004.00 | F02 | M-006205- 5-hydroxytryptamine (seroto    | 9177.00   | HTR3B  | 0.91  | 9.03  |
| 50004.00 | F04 | M-006204- 5-hydroxytryptamine (seroto    | 3359.00   | HTR3A  | 2.59  | 7.35  |
| 50004.00 | F05 | M-005536- G protein-coupled receptor 1   | 221393.00 | GPR115 | 3.97  | 5.97  |
| 50004.00 | F06 | M-005640- 5-hydroxytryptamine (seroto    | 3358.00   | HTR2C  | 4.14  | 5.80  |
| 50004.00 | F07 | M-005537- G protein-coupled receptor 1   | 221395.00 | GPR116 | 1.04  | 8.90  |
| 50004.00 | F08 | M-005638- 5-hydroxytryptamine (seroto    | 3356.00   | HTR2A  | 3.27  | 6.67  |
| 50004.00 | F09 | M-005521- G protein-coupled receptor 1   | 139760.00 | GPR119 | 3.99  | 5.95  |
| 50004.00 | F10 | M-005637- 5-hydroxytryptamine (seroto    | 3355.00   | HTR1F  | 2.84  | 7.10  |
| 50004.00 | F11 | M-005538- G protein-coupled receptor 1   | 2835.00   | GPR12  | 7.29  | 2.65  |
| 50004.00 | F12 | M-005636- 5-hydroxytryptamine (seroto    | 3354.00   | HTR1E  | 9.06  | 0.88  |
| 50004.00 | F13 | M-005539- G protein-coupled receptor 1   | 84435.00  | GPR123 | 6.85  | 3.09  |
| 50004.00 | F14 | M-005635- 5-hydroxytryptamine (seroto    | 3352.00   | HTR1D  | 6.47  | 3.47  |
| 50004.00 | F15 | M-005540- G protein-coupled receptor 1   | 25960.00  | GPR124 | 5.17  | 4.77  |
| 50004.00 | F16 | M-005634- 5-hydroxytryptamine (seroto    | 3351.00   | HTR1B  | 7.75  | 2.19  |
| 50004.00 | F17 | M-005541- G protein-coupled receptor 1   | 57211.00  | GPR126 | 9.18  | 0.76  |
| 50004.00 | F18 | M-005633- 5-hydroxytryptamine (seroto    | 3350.00   | HTR1A  | 5.05  | 4.89  |
| 50004.00 | F19 | M-005543- G protein-coupled receptor 1   | 84873.00  | GPR128 | 14.55 | 4.61  |
| 50004.00 | F20 | M-005632- histamine receptor H4          | 59340.00  | HRH4   | 21.62 | 11.68 |
| 50004.00 | F21 | M-005507- G protein-coupled receptor 1   | 29933.00  | GPR132 | 16.95 | 7.01  |
| 50004.00 | F23 | M-025110- opsin 5                        | 221391.00 | OPN5   | 17.89 | 7.95  |
| 50004.00 | G02 | M-005504- frizzled homolog 5 (Drosophi   | 7855.00   | FZD5   | 18.01 | 8.07  |
| 50004.00 | G04 | M-005503- frizzled homolog 4 (Drosophi   | 8322.00   | FZD4   | 21.56 | 11.62 |
| 50004.00 | G05 | M-005436- bradykinin receptor B2         | 624.00    | BDKRB2 | 22.72 | 12.78 |
| 50004.00 | G06 | M-005502- frizzled homolog 3 (Drosophi   | 7976.00   | FZD3   | 21.94 | 12.00 |
| 50004.00 | G07 | M-005437- Burkitt lymphoma receptor 1    | 643.00    | BLR1   | 6.31  | 3.63  |
| 50004.00 | G08 | M-005501- frizzled homolog 2 (Drosophi   | 2535.00   | FZD2   | 6.18  | 3.76  |
| 50004.00 | G09 | M-005438- bombesin-like receptor 3       | 680.00    | BRS3   | 14.31 | 4.37  |
| 50004.00 | G10 | M-005500- frizzled homolog 10 (Drosophi  | 11211.00  | FZD10  | 9.96  | 0.02  |
| 50004.00 | G11 | M-005440- transmembrane protein 11       | 8834.00   | TMEM11 | 9.97  | 0.03  |
| 50004.00 | G12 | M-005499- frizzled homolog 1 (Drosophi   | 8321.00   | FZD1   | 16.91 | 6.97  |
| 50004.00 | G13 | M-011001- complement component 3         | 718.00    | C3     | 18.73 | 8.79  |
| 50004.00 | G14 | M-005498- Duffy blood group, chemokin    | 2532.00   | DARC   | 6.20  | 3.74  |
| 50004.00 | G15 | M-005441- complement component 3a i      | 719.00    | C3AR1  | 22.20 | 12.26 |
| 50004.00 | G16 | M-005497- follicle stimulating hormone   | 2492.00   | FSHR   | 25.86 | 15.92 |
| 50004.00 | G17 | M-007819- complement component 5         | 727.00    | C5     | 13.69 | 3.75  |
| 50004.00 | G18 | M-005141- formyl peptide receptor-like   | 2359.00   | FPRL2  | 15.14 | 5.20  |
| 50004.00 | G19 | M-005442- complement component 5a i      | 728.00    | C5AR1  | 17.38 | 7.44  |
| 50004.00 | G20 | M-005140- formyl peptide receptor-like   | 2358.00   | FPRL1  | 14.66 | 4.72  |
| 50004.00 | G21 | M-017985- neuropeptide VF precursor      | 64111.00  | NPVF   | 15.30 | 5.36  |
| 50004.00 | G23 | M-021447- calcitonin/calcitonin-related  | 796.00    | CALCA  | 12.35 | 2.41  |

|          |     |                                           |           |         |       |       |
|----------|-----|-------------------------------------------|-----------|---------|-------|-------|
| 50004.00 | H02 | M-005631- histamine receptor H3           | 11255.00  | HRH3    | 6.99  | 2.95  |
| 50004.00 | H04 | M-005630- histamine receptor H2           | 3274.00   | HRH2    | 12.20 | 2.26  |
| 50004.00 | H05 | M-005544- urotensin 2 receptor            | 2837.00   | UTS2R   | 4.57  | 5.37  |
| 50004.00 | H06 | M-004340- histamine receptor H1           | 3269.00   | HRH1    | 13.80 | 3.86  |
| 50004.00 | H07 | M-005545- G protein-coupled receptor 1    | 353345.00 | GPR141  | 18.96 | 9.02  |
| 50004.00 | H08 | M-006688- G protein-coupled receptor 1    | 338442.00 | GPR109A | 10.09 | 0.15  |
| 50004.00 | H09 | M-005677- G protein-coupled receptor 1    | 4935.00   | GPR143  | 13.46 | 3.52  |
| 50004.00 | H10 | M-005628- G protein-coupled receptor 1    | 8843.00   | GPR109B | 14.70 | 4.76  |
| 50004.00 | H11 | M-005548- melanin-concentrating horm      | 84539.00  | MCHR2   | 10.52 | 0.58  |
| 50004.00 | H12 | M-005625- G protein-coupled receptor 1    | 29909.00  | GPR171  | 12.26 | 2.32  |
| 50004.00 | H13 | M-005549- G protein-coupled receptor 1    | 115330.00 | GPR146  | 10.30 | 0.36  |
| 50004.00 | H14 | M-005624- gastrin-releasing peptide rec   | 2925.00   | GRPR    | 26.19 | 16.25 |
| 50004.00 | H15 | M-005550- G protein-coupled receptor 1    | 2838.00   | GPR15   | 11.82 | 1.88  |
| 50004.00 | H16 | M-005623- glutamate receptor, metabo      | 2918.00   | GRM8    | 10.96 | 1.02  |
| 50004.00 | H17 | M-005508- G protein-coupled receptor 1    | 165829.00 | GPR156  | 7.09  | 2.85  |
| 50004.00 | H18 | M-005622- glutamate receptor, metabo      | 2917.00   | GRM7    | 10.47 | 0.53  |
| 50004.00 | H19 | M-016136- G protein-coupled receptor 1    | 80045.00  | GPR157  | 24.84 | 14.90 |
| 50004.00 | H20 | M-005621- glutamate receptor, metabo      | 2916.00   | GRM6    | 22.48 | 12.54 |
| 50004.00 | H21 | M-005520- G protein-coupled receptor 1    | 26996.00  | GPR160  | 19.19 | 9.25  |
| 50004.00 | H23 | M-005720- G protein-coupled receptor 1    | 23432.00  | GPR161  | 10.94 | 1.00  |
| 50004.00 | I02 | M-003667- formyl peptide receptor 1       | 2357.00   | FPR1    | 14.37 | 4.43  |
| 50004.00 | I04 | M-005494- G protein-coupled receptor 1    | 151556.00 | GPR155  | 9.81  | 0.13  |
| 50004.00 | I05 | M-003635- calcitonin receptor             | 799.00    | CALCR   | 10.90 | 0.96  |
| 50004.00 | I06 | M-009071- olfactory receptor, family 7, : | 219445.00 | OR7E5P  | 11.00 | 1.06  |
| 50004.00 | I07 | M-004350- calcitonin receptor-like        | 10203.00  | CALCRL  | 24.66 | 14.72 |
| 50004.00 | I08 | M-016964- tRNA-histidine guanylyltransf   | 54974.00  | THG1L   | 12.28 | 2.34  |
| 50004.00 | I09 | M-017646- calmodulin 1 (phosphorylase     | 801.00    | CALM1   | 7.83  | 2.11  |
| 50004.00 | I10 | M-010743- G protein-coupled receptor 1    | 79581.00  | GPR172A | 21.53 | 11.59 |
| 50004.00 | I11 | M-005444- calcium-sensing receptor (hy    | 846.00    | CASR    | 17.48 | 7.54  |
| 50004.00 | I12 | M-015863- notchless homolog 1 (Droso      | 54475.00  | NLE1    | 11.00 | 1.06  |
| 50004.00 | I13 | M-005445- chemokine binding protein 2     | 1238.00   | CCBP2   | 11.62 | 1.68  |
| 50004.00 | I14 | M-010712- G protein-coupled receptor 1    | 55065.00  | GPR172B | 19.92 | 9.98  |
| 50004.00 | I15 | M-007828- chemokine (C-C motif) ligand    | 6361.00   | CCL17   | 6.12  | 3.82  |
| 50004.00 | I16 | M-014769- FKSG83                          | 83954.00  | FKSG83  | 19.09 | 9.15  |
| 50004.00 | I17 | M-007831- chemokine (C-C motif) ligand    | 6347.00   | CCL2    | 8.64  | 1.30  |
| 50004.00 | I18 | M-005493- G protein-coupled receptor 1    | 84636.00  | GPR174  | 11.89 | 1.95  |
| 50004.00 | I19 | M-007835- chemokine (C-C motif) ligand    | 6368.00   | CCL23   | 5.22  | 4.72  |
| 50004.00 | I20 | M-005492- coagulation factor II (thromb   | 9002.00   | F2RL3   | 6.51  | 3.43  |
| 50004.00 | I21 | M-007837- chemokine (C-C motif) ligand    | 6370.00   | CCL25   | 11.33 | 1.39  |
| 50004.00 | I23 | M-007841- chemokine (C-C motif) ligand    | 6348.00   | CCL3    | 3.87  | 6.07  |
| 50004.00 | J02 | M-005620- glutamate receptor, metabo      | 2915.00   | GRM5    | 10.15 | 0.21  |
| 50004.00 | J04 | M-005619- glutamate receptor, metabo      | 2914.00   | GRM4    | 6.68  | 3.26  |
| 50004.00 | J05 | M-005551- G protein-coupled receptor 1    | 2840.00   | GPR17   | 13.76 | 3.82  |
| 50004.00 | J06 | M-005618- glutamate receptor, metabo      | 2913.00   | GRM3    | 7.39  | 2.55  |
| 50004.00 | J07 | M-005552- G protein-coupled receptor 1    | 2841.00   | GPR18   | 11.71 | 1.77  |
| 50004.00 | J08 | M-005617- glutamate receptor, metabo      | 2912.00   | GRM2    | 11.30 | 1.36  |
| 50004.00 | J09 | M-005553- G protein-coupled receptor 1    | 2842.00   | GPR19   | 10.86 | 0.92  |



|                     |                                               |                       |                     |              |
|---------------------|-----------------------------------------------|-----------------------|---------------------|--------------|
| 50004.00 J10        | M-005616- glutamate receptor, metabo          | 2911.00 GRM1          | 17.77               | 7.83         |
| 50004.00 J11        | M-005554- chemokine (C-C motif) recep         | 2826.00 CCR10         | 8.65                | 1.29         |
| 50004.00 J12        | M-005615- relaxin/insulin-like family pe      | 122042.00 RXFP2       | 16.03               | 6.09         |
| 50004.00 J13        | M-005555- G protein-coupled receptor 2        | 2843.00 GPR20         | 7.07                | 2.87         |
| 50004.00 J14        | M-005614- G protein-coupled receptor 1        | 27239.00 GPR162       | 20.31               | 10.37        |
| <b>50004.00 J15</b> | <b>M-005556- G protein-coupled receptor 2</b> | <b>2844.00 GPR21</b>  | <b><u>24.62</u></b> | <b>14.68</b> |
| 50004.00 J16        | M-004628- G protein-coupled receptor k        | 131890.00 GRK7        | 14.12               | 4.18         |
| 50004.00 J17        | M-005557- G protein-coupled receptor 2        | 2845.00 GPR22         | 7.99                | 1.96         |
| 50004.00 J18        | M-004627- G protein-coupled receptor k        | 2870.00 GRK6          | 7.44                | 2.50         |
| 50004.00 J19        | M-005558- G protein-coupled receptor 2        | 2846.00 GPR23         | 3.84                | 6.10         |
| 50004.00 J20        | M-004626- G protein-coupled receptor k        | 2869.00 GRK5          | 5.47                | 4.47         |
| 50004.00 J21        | M-005559- melanin-concentrating horm          | 2847.00 MCHR1         | 12.57               | 2.63         |
| 50004.00 J23        | M-005560- G protein-coupled receptor 2        | 2848.00 GPR25         | 8.06                | 1.88         |
| 50004.00 K02        | M-005491- coagulation factor II (thromb       | 2151.00 F2RL2         | 4.72                | 5.22         |
| 50004.00 K04        | M-005095- coagulation factor II (thromb       | 2150.00 F2RL1         | 4.78                | 5.16         |
| 50004.00 K05        | M-005448- chemokine (C-C motif) recep         | 1230.00 CCR1          | 7.48                | 2.46         |
| 50004.00 K06        | M-005094- coagulation factor II (thromb       | 2149.00 F2R           | 10.32               | 0.38         |
| 50004.00 K07        | M-005449- chemokine (C-C motif) recep         | 1231.00 CCR2          | 7.50                | 2.44         |
| 50004.00 K08        | M-005490- G protein-coupled receptor 3        | 9283.00 GPR37L1       | 7.52                | 2.42         |
| 50004.00 K09        | M-005450- chemokine (C-C motif) recep         | 1232.00 CCR3          | 7.50                | 2.44         |
| 50004.00 K10        | M-004601- ectonucleotide pyrophospha          | 5168.00 ENPP2         | 6.09                | 3.85         |
| 50004.00 K11        | M-005451- chemokine (C-C motif) recep         | 1233.00 CCR4          | 16.89               | 6.95         |
| 50004.00 K12        | M-005489- egf-like module containing, n       | 84658.00 EMR3         | 14.51               | 4.57         |
| 50004.00 K13        | M-004855- chemokine (C-C motif) recep         | 1234.00 CCR5          | 15.51               | 5.57         |
| 50004.00 K14        | M-005487- egf-like module containing, n       | 2015.00 EMR1          | 18.82               | 8.88         |
| 50004.00 K15        | M-005453- chemokine (C-C motif) recep         | 1235.00 CCR6          | 12.46               | 2.52         |
| 50004.00 K16        | M-021612- EGF, latrophilin and seven tra      | 64123.00 ELTD1        | 9.93                | 0.01         |
| 50004.00 K17        | M-005454- chemokine (C-C motif) recep         | 1236.00 CCR7          | 11.91               | 1.97         |
| 50004.00 K18        | M-010269- elongation of very long chain       | 6785.00 ELOVL4        | 15.18               | 5.24         |
| 50004.00 K19        | M-005455- chemokine (C-C motif) recep         | 1237.00 CCR8          | 10.78               | 0.84         |
| <b>50004.00 K20</b> | <b>M-003657- endothelin receptor type B</b>   | <b>1910.00 EDNRB</b>  | <b>23.12</b>        | <b>13.18</b> |
| 50004.00 K21        | M-005456- chemokine (C-C motif) recep         | 10803.00 CCR9         | 10.09               | 0.15         |
| <b>50004.00 K23</b> | <b>M-005457- chemokine (C-C motif) recep</b>  | <b>51554.00 CCRL1</b> | <b><u>26.57</u></b> | <b>16.63</b> |
| 50004.00 L02        | M-004625- G protein-coupled receptor k        | 2868.00 GRK4          | 5.46                | 4.48         |
| 50004.00 L04        | M-005613- G protein-coupled receptor, 7       | 222545.00 GPRC6A      | 6.60                | 3.34         |
| 50004.00 L05        | M-005561- G protein-coupled receptor 2        | 2849.00 GPR26         | 4.22                | 5.72         |
| 50004.00 L06        | M-005612- G protein-coupled receptor, 7       | 55507.00 GPRC5D       | 2.82                | 7.12         |
| 50004.00 L07        | M-005562- G protein-coupled receptor 2        | 2850.00 GPR27         | 6.91                | 3.04         |
| 50004.00 L08        | M-005611- G protein-coupled receptor, 7       | 55890.00 GPRC5C       | 6.77                | 3.17         |
| 50004.00 L09        | M-003951- G protein-coupled receptor 3        | 2827.00 GPR3          | 5.12                | 4.82         |
| 50004.00 L10        | M-005610- G protein-coupled receptor, 7       | 51704.00 GPRC5B       | 8.78                | 1.16         |
| 50004.00 L11        | M-005563- G protein-coupled receptor 3        | 2852.00 GPR30         | 8.10                | 1.84         |
| 50004.00 L12        | M-005609- G protein-coupled receptor 9        | 222487.00 GPR97       | 6.31                | 3.63         |
| 50004.00 L13        | M-005564- G protein-coupled receptor 3        | 2853.00 GPR31         | 6.15                | 3.79         |
| 50004.00 L14        | M-004604- G protein-coupled receptor 9        | 57121.00 GPR92        | 10.45               | 0.51         |
| 50004.00 L15        | M-005565- G protein-coupled receptor 3        | 2854.00 GPR32         | 13.92               | 3.98         |
| 50004.00 L16        | M-004541- succinate receptor 1                | 56670.00 SUCNR1       | 14.44               | 4.50         |



|          |     |                                          |          |        |       |       |
|----------|-----|------------------------------------------|----------|--------|-------|-------|
| 50004.00 | L17 | M-005566- G protein-coupled receptor 3   | 2857.00  | GPR34  | 9.53  | 0.41  |
| 50004.00 | L18 | M-005608- G protein-coupled receptor 8   | 54112.00 | GPR88  | 9.47  | 0.47  |
| 50004.00 | L19 | M-005567- G protein-coupled receptor 3   | 2859.00  | GPR35  | 7.41  | 2.53  |
| 50004.00 | L20 | M-005607- G protein-coupled receptor 8   | 53836.00 | GPR87  | 13.65 | 3.71  |
| 50004.00 | L21 | M-003604- G protein-coupled receptor 3   | 2861.00  | GPR37  | 16.89 | 6.95  |
| 50004.00 | L23 | M-005568- motilin receptor               | 2862.00  | MLNR   | 7.17  | 2.77  |
| 50004.00 | M02 | M-005485- endothelin receptor type A     | 1909.00  | EDNRA  | 5.56  | 4.38  |
| 50004.00 | M04 | M-004791- endothelial differentiation, s | 53637.00 | EDG8   | 10.61 | 0.67  |
| 50004.00 | M05 | M-005458- chemokine (C-C motif) recep    | 9034.00  | CCRL2  | 9.60  | 0.34  |
| 50004.00 | M06 | M-004895- endothelial differentiation, l | 23566.00 | EDG7   | 4.31  | 5.63  |
| 50004.00 | M07 | M-003775- CD3e molecule, epsilon (CD3    | 916.00   | CD3E   | 4.77  | 5.17  |
| 50004.00 | M08 | M-005484- endothelial differentiation, l | 8698.00  | EDG6   | 14.49 | 4.55  |
| 50004.00 | M09 | M-003638- CD97 molecule                  | 976.00   | CD97   | 8.91  | 1.03  |
| 50004.00 | M10 | M-003952- endothelial differentiation, s | 9294.00  | EDG5   | 16.75 | 6.81  |
| 50004.00 | M11 | M-005459- cadherin, EGF LAG seven-pas    | 9620.00  | CELSR1 | 12.50 | 2.56  |
| 50004.00 | M12 | M-004602- endothelial differentiation, l | 9170.00  | EDG4   | 18.13 | 8.19  |
| 50004.00 | M13 | M-005460- cadherin, EGF LAG seven-pas    | 1952.00  | CELSR2 | 9.11  | 0.83  |
| 50004.00 | M14 | M-005208- endothelial differentiation, s | 1903.00  | EDG3   | 18.35 | 8.41  |
| 50004.00 | M15 | M-005461- cadherin, EGF LAG seven-pas    | 1951.00  | CELSR3 | 19.17 | 9.23  |
| 50004.00 | M16 | M-003656- endothelial differentiation, l | 1902.00  | EDG2   | 15.48 | 5.54  |
| 50004.00 | M17 | M-019937- chromatin assembly factor 1,   | 8208.00  | CHAF1B | 14.37 | 4.43  |
| 50004.00 | M18 | M-003655- endothelial differentiation, s | 1901.00  | EDG1   | 19.00 | 9.06  |
| 50004.00 | M19 | M-005463- cholinergic receptor, muscari  | 1129.00  | CHRM2  | 5.09  | 4.85  |
| 50004.00 | M20 | M-005858- endothelin converting enzym    | 9718.00  | ECE2   | 24.88 | 14.94 |
| 50004.00 | M21 | M-005464- cholinergic receptor, muscari  | 1131.00  | CHRM3  | 16.78 | 6.84  |
| 50004.00 | M23 | M-005467- chemokine-like receptor 1      | 1240.00  | CMKLR1 | 16.53 | 6.59  |
| 50004.00 | N02 | M-005606- purinergic receptor P2Y, G-pi  | 53829.00 | P2RY13 | 3.41  | 6.53  |
| 50004.00 | N04 | M-005605- G protein-coupled receptor 8   | 54329.00 | GPR85  | 10.51 | 0.57  |
| 50004.00 | N05 | M-005569- G protein-coupled receptor 3   | 2863.00  | GPR39  | 6.99  | 2.95  |
| 50004.00 | N06 | M-005604- G protein-coupled receptor 8   | 53831.00 | GPR84  | 15.13 | 5.19  |
| 50004.00 | N07 | M-005570- G protein-coupled receptor 4   | 2828.00  | GPR4   | 7.46  | 2.48  |
| 50004.00 | N08 | M-005602- G protein-coupled receptor 8   | 27197.00 | GPR82  | 6.56  | 3.38  |
| 50004.00 | N09 | M-005571- free fatty acid receptor 1     | 2864.00  | FFAR1  | 8.41  | 1.53  |
| 50004.00 | N10 | M-005601- G protein-coupled receptor 8   | 27198.00 | GPR81  | 8.71  | 1.23  |
| 50004.00 | N11 | M-005572- free fatty acid receptor 3     | 2865.00  | FFAR3  | 11.58 | 1.64  |
| 50004.00 | N12 | M-005600- oxoglutarate (alpha-ketoglut   | 27199.00 | OXGR1  | 19.20 | 9.26  |
| 50004.00 | N13 | M-005573- G protein-coupled receptor 4   | 2866.00  | GPR42  | 10.27 | 0.33  |
| 50004.00 | N14 | M-005599- neuropeptides B/W receptor     | 2832.00  | NPBWR2 | 17.75 | 7.81  |
| 50004.00 | N15 | M-005574- free fatty acid receptor 2     | 2867.00  | FFAR2  | 22.70 | 12.76 |
| 50004.00 | N16 | M-005598- G protein-coupled receptor 7   | 27201.00 | GPR78  | 9.62  | 0.32  |
| 50004.00 | N17 | M-005575- G protein-coupled receptor 4   | 11251.00 | GPR44  | 7.86  | 2.08  |
| 50004.00 | N18 | M-005597- G protein-coupled receptor 7   | 27202.00 | GPR77  | 12.01 | 2.07  |
| 50004.00 | N19 | M-005576- G protein-coupled receptor 4   | 11250.00 | GPR45  | 13.42 | 3.48  |
| 50004.00 | N20 | M-005596- G protein-coupled receptor 7   | 10936.00 | GPR75  | 16.42 | 6.48  |
| 50004.00 | N21 | M-003673- leucine-rich repeat-containin  | 55366.00 | LGR4   | 19.36 | 9.42  |
| 50004.00 | N23 | M-005577- leucine-rich repeat-containin  | 8549.00  | LGR5   | 16.09 | 6.15  |
| 50004.00 | O02 | M-005482- Epstein-Barr virus induced ge  | 1880.00  | EBI2   | 8.64  | 1.30  |

|                     |                                                |                       |              |              |
|---------------------|------------------------------------------------|-----------------------|--------------|--------------|
| 50004.00 O04        | M-005481- dopamine receptor D5                 | 1816.00 DRD5          | 7.84         | 2.10         |
| 50004.00 O05        | M-004711- cannabinoid receptor 1 (brai         | 1268.00 CNR1          | 12.90        | 2.96         |
| <b>50004.00 O06</b> | <b>M-005477- dopamine receptor D1</b>          | <b>1812.00 DRD1</b>   | <b>31.39</b> | <b>21.45</b> |
| 50004.00 O07        | M-005469- cannabinoid receptor 2 (mac          | 1269.00 CNR2          | 9.64         | 0.30         |
| 50004.00 O08        | M-012997- defensin, beta 4                     | 1673.00 DEFB4         | 11.69        | 1.75         |
| 50004.00 O09        | M-003647- corticotropin releasing horm         | 1394.00 CRHR1         | 8.59         | 1.35         |
| 50004.00 O10        | M-005476- cysteinyl leukotriene recepto        | 57105.00 CYSLTR2      | 15.11        | 5.17         |
| 50004.00 O11        | M-005470- corticotropin releasing horm         | 1395.00 CRHR2         | 12.51        | 2.57         |
| 50004.00 O12        | M-005475- cysteinyl leukotriene recepto        | 10800.00 CYSLTR1      | 10.16        | 0.22         |
| <b>50004.00 O13</b> | <b>M-015421- cryptochrome 1 (photolyase-</b>   | <b>1407.00 CRY1</b>   | <b>21.94</b> | <b>12.00</b> |
| <b>50004.00 O14</b> | <b>M-005474- chemokine (C-X-C motif) rece</b>  | <b>10663.00 CXCR6</b> | <b>27.49</b> | <b>17.55</b> |
| 50004.00 O15        | M-005471- chemokine (C-X3-C motif) rec         | 1524.00 CX3CR1        | 10.02        | 0.08         |
| 50004.00 O16        | M-005139- chemokine (C-X-C motif) rece         | 7852.00 CXCR4         | 16.95        | 7.01         |
| 50004.00 O17        | M-003898- chemokine (C-X-C motif) ligal        | 2919.00 CXCL1         | 8.34         | 1.60         |
| 50004.00 O18        | M-005472- chemokine (C-X-C motif) rece         | 2833.00 CXCR3         | 14.91        | 4.97         |
| 50004.00 O19        | M-007873- chemokine (C-X-C motif) ligal        | 6387.00 CXCL12        | 17.68        | 7.74         |
| 50004.00 O20        | M-007881- chemokine (C-X-C motif) ligal        | 4283.00 CXCL9         | 5.79         | 4.15         |
| <b>50004.00 O21</b> | <b>M-007877- chemokine (C-X-C motif) ligal</b> | <b>2920.00 CXCL2</b>  | <b>13.56</b> | <b>3.62</b>  |
| 50004.00 O23        | M-007878- chemokine (C-X-C motif) ligal        | 2921.00 CXCL3         | 7.72         | 2.22         |
| 50004.00 P02        | M-005595- neuropeptide FF receptor 2           | 10886.00 NPFFR2       | 4.85         | 5.09         |
| 50004.00 P04        | M-005594- prokineticin receptor 2              | 128674.00 PROKR2      | 11.16        | 1.22         |
| 50004.00 P05        | M-005578- G protein-coupled receptor 5         | 9248.00 GPR50         | 11.54        | 1.60         |
| 50004.00 P06        | M-005593- prokineticin receptor 1              | 10887.00 PROKR1       | 11.86        | 1.92         |
| 50004.00 P07        | M-005579- gamma-aminobutyric acid (G           | 9568.00 GABBR2        | 12.48        | 2.54         |
| 50004.00 P08        | M-005603- G protein-coupled receptor 8         | 10888.00 GPR83        | 5.12         | 4.82         |
| 50004.00 P09        | M-005580- G protein-coupled receptor 5         | 9293.00 GPR52         | 4.11         | 5.83         |
| 50004.00 P10        | M-005592- neuropeptides B/W receptor           | 2831.00 NPBWR1        | 6.34         | 3.60         |
| 50004.00 P11        | M-004901- KISS1 receptor                       | 84634.00 KISS1R       | 12.28        | 2.34         |
| 50004.00 P12        | M-005591- G protein-coupled receptor 6         | 8111.00 GPR68         | 7.89         | 2.05         |
| 50004.00 P13        | M-005581- G protein-coupled receptor 5         | 9290.00 GPR55         | 9.35         | 0.59         |
| 50004.00 P14        | M-005590- neuromedin U receptor 1              | 10316.00 NMUR1        | 20.62        | 10.68        |
| 50004.00 P15        | M-004552- G protein-coupled receptor 5         | 9289.00 GPR56         | 12.66        | 2.72         |
| 50004.00 P16        | M-005589- G protein-coupled receptor 6         | 8477.00 GPR65         | 10.51        | 0.57         |
| 50004.00 P17        | M-005583- trace amine associated recep         | 9287.00 TAAR2         | 9.56         | 0.38         |
| 50004.00 P18        | M-003812- G protein-coupled receptor 6         | 10149.00 GPR64        | 19.62        | 9.68         |
| 50004.00 P19        | M-005584- G protein-coupled receptor 6         | 2830.00 GPR6          | 12.05        | 2.11         |
| 50004.00 P20        | M-005587- G protein-coupled receptor 6         | 81491.00 GPR63        | 5.38         | 4.56         |
| 50004.00 P21        | M-005585- G protein-coupled receptor 6         | 83873.00 GPR61        | 16.94        | 7.00         |
| 50004.00 P23        | M-005586- G protein-coupled receptor 6         | 118442.00 GPR62       | 6.64         | 3.30         |
|                     |                                                | MAD                   | 9.94         | 3.76         |
|                     | 0.05                                           | 3MAD                  |              | 11.27        |
|                     |                                                | MADc                  |              | 5.56         |
| 50004.00 C22        |                                                |                       | 53.16        |              |
| 50004.00 D22        |                                                |                       | 45.35        |              |
| 50004.00 E22        |                                                |                       | 37.29        |              |
| 50004.00 F22        |                                                |                       | 53.85        |              |
|                     |                                                | mn                    | 47.41        |              |

|              |                                            |           |       |
|--------------|--------------------------------------------|-----------|-------|
|              |                                            | sd        | 7.77  |
| 50004.00 G22 |                                            |           | 4.89  |
| 50004.00 H22 |                                            |           | 10.50 |
| 50004.00 I22 |                                            |           | 3.61  |
| 50004.00 J22 |                                            |           | 5.02  |
|              |                                            | mn        | 6.01  |
|              |                                            | sd        | 3.07  |
|              |                                            | 3psSD     | 23.32 |
|              |                                            | 3ngSD     | 9.20  |
|              |                                            | SumSD     | 32.52 |
|              |                                            | MeanDf    | 41.41 |
|              |                                            | SumovrMn  | 0.79  |
|              |                                            | 1minus    | 0.21  |
| 50004.00 G03 | M-003290- polo-like kinase 1 (Drosophila)  | PLK1 SMAF | 18.33 |
| 50004.00 H03 | M-003290- polo-like kinase 1 (Drosophila)  | PLK1 SMAF | 7.36  |
| 50004.00 I03 | D-001206-:siControl non-targeting siRNA #2 |           | 11.82 |
| 50004.00 J03 | D-001206-:siControl non-targeting siRNA #2 |           | 25.05 |

| <u>robust Z</u> | <u>% inf</u> | <u>abs dev</u> | <u>robust Z</u> | <u>% inf</u> | <u>abs dev</u> | <u>robust Z</u> |
|-----------------|--------------|----------------|-----------------|--------------|----------------|-----------------|
| -1.10           | 2.67         | 4.82           | -1.07           | 2.64         | 7.01           | -1.37           |
| -1.18           | 4.24         | 3.25           | -0.72           | 5.26         | 4.39           | -0.86           |
| -0.28           | 4.56         | 2.93           | -0.65           | 6.19         | 3.46           | -0.68           |
| -0.63           | 5.28         | 2.21           | -0.49           | 6.65         | 3.00           | -0.59           |
| -0.90           | 3.72         | 3.77           | -0.84           | 5.02         | 4.64           | -0.90           |
| 1.40            | 10.53        | 3.04           | 0.68            | 17.34        | 7.69           | 1.50            |
| -0.15           | 5.25         | 2.24           | -0.50           | 5.92         | 3.73           | -0.73           |
| 2.17            | 14.94        | 7.45           | 1.66            | 21.60        | 11.95          | 2.34 y          |
| 0.10            | 7.17         | 0.32           | -0.07           | 10.72        | 1.07           | 0.21            |
| -0.33           | 5.03         | 2.46           | -0.55           | 6.13         | 3.52           | -0.69           |
| 0.73            | 10.24        | 2.75           | 0.61            | 7.86         | 1.79           | -0.35           |
| 0.21            | 13.32        | 5.83           | 1.30            | 6.92         | 2.73           | -0.53           |
| -0.65           | 7.49         | 0.00           | 0.00            | 6.68         | 2.97           | -0.58           |
| -1.04           | 7.97         | 0.48           | 0.11            | 7.88         | 1.77           | -0.35           |
| 0.49            | 8.04         | 0.55           | 0.12            | 4.14         | 5.51           | -1.07           |
| -0.41           | 9.13         | 1.64           | 0.36            | 9.88         | 0.23           | 0.05            |
| 0.10            | 11.72        | 4.23           | 0.94            | 14.53        | 4.88           | 0.96            |
| -1.12           | 6.97         | 0.52           | -0.12           | 11.54        | 1.89           | 0.37            |
| -1.26           | 4.98         | 2.51           | -0.56           | 6.61         | 3.04           | -0.59           |
| -0.79           | 6.79         | 0.70           | -0.16           | 8.92         | 0.73           | -0.14           |
| -1.65           | 1.59         | 5.90           | -1.31           | 3.16         | 6.49           | -1.27           |
| -1.69           | 0.28         | 7.21           | -1.60           | 3.91         | 5.74           | -1.12           |
| -1.52           | 0.70         | 6.79           | -1.51           | 4.64         | 5.01           | -0.98           |
| -1.34           | 1.80         | 5.69           | -1.27           | 5.95         | 3.71           | -0.72           |
| -1.56           | 1.45         | 6.04           | -1.34           | 2.40         | 7.25           | -1.42           |
| -1.25           | 3.08         | 4.41           | -0.98           | 9.50         | 0.15           | -0.03           |
| -0.86           | 4.04         | 3.45           | -0.77           | 11.87        | 2.22           | 0.43            |
| -0.42           | 3.40         | 4.09           | -0.91           | 11.39        | 1.74           | 0.34            |
| -1.15           | 2.96         | 4.53           | -1.01           | 9.06         | 0.59           | -0.11           |
| -1.37           | 1.84         | 5.65           | -1.26           | 4.33         | 5.32           | -1.04           |
| -0.97           | 4.44         | 3.05           | -0.68           | 5.08         | 4.57           | -0.89           |
| -0.75           | 2.36         | 5.13           | -1.14           | 6.49         | 3.16           | -0.62           |
| -1.22           | 3.63         | 3.86           | -0.86           | 7.36         | 2.29           | -0.45           |
| 1.13            | 10.72        | 3.23           | 0.72            | 17.07        | 7.42           | 1.45            |
| 0.27            | 8.17         | 0.68           | 0.15            | 12.66        | 3.01           | 0.59            |
| -1.37           | 4.02         | 3.47           | -0.77           | 8.77         | 0.88           | -0.17           |
| 0.08            | 13.41        | 5.92           | 1.32            | 15.18        | 5.53           | 1.08            |
| -1.49           | 2.83         | 4.66           | -1.04           | 5.30         | 4.35           | -0.85           |
| -0.71           | 9.63         | 2.14           | 0.48            | 8.92         | 0.73           | -0.14           |
| 0.52            | 13.44        | 5.95           | 1.32            | 19.44        | 9.79           | 1.91            |
| -1.62           | 4.74         | 2.75           | -0.61           | 7.23         | 2.42           | -0.47           |
| -0.54           | 18.54        | 11.05          | 2.46            | 22.60        | 12.95          | 2.53 y          |
| -1.12           | 5.71         | 1.78           | -0.40           | 6.33         | 3.32           | -0.65           |
| -1.07           | 7.15         | 0.34           | -0.08           | 11.82        | 2.17           | 0.42            |
| 0.23            | 14.35        | 6.86           | 1.53            | 20.44        | 10.79          | 2.11            |
| -0.56           | 12.76        | 5.27           | 1.17            | 12.21        | 2.56           | 0.50            |

|       |       |       |       |       |       |        |
|-------|-------|-------|-------|-------|-------|--------|
| 0.00  | 13.41 | 5.92  | 1.32  | 17.95 | 8.30  | 1.62   |
| -0.18 | 9.12  | 1.63  | 0.36  | 12.59 | 2.94  | 0.58   |
| 0.50  | 19.19 | 11.70 | 2.60  | 18.91 | 9.26  | 1.81   |
| -0.24 | 12.57 | 5.08  | 1.13  | 16.35 | 6.70  | 1.31   |
| -1.63 | 10.34 | 2.85  | 0.63  | 7.05  | 2.60  | -0.51  |
| -0.22 | 17.86 | 10.37 | 2.31  | 16.04 | 6.39  | 1.25   |
| -0.69 | 8.07  | 0.58  | 0.13  | 9.65  | 0.00  | 0.00   |
| 0.54  | 9.78  | 2.29  | 0.51  | 12.81 | 3.16  | 0.62   |
| 0.15  | 14.14 | 6.65  | 1.48  | 11.32 | 1.67  | 0.33   |
| 0.17  | 20.86 | 13.37 | 2.97  | 14.64 | 4.99  | 0.98   |
| 1.17  | 17.13 | 9.64  | 2.14  | 15.96 | 6.31  | 1.23   |
| 0.45  | 18.64 | 11.15 | 2.48  | 16.47 | 6.82  | 1.33   |
| -0.13 | 12.49 | 5.00  | 1.11  | 7.82  | 1.84  | -0.36  |
| 3.13  | 25.95 | 18.46 | 4.11  | 24.97 | 15.32 | 3.00 y |
| -1.18 | 3.69  | 3.80  | -0.84 | 8.32  | 1.33  | -0.26  |
| -0.74 | 5.73  | 1.76  | -0.39 | 9.41  | 0.24  | -0.05  |
| 0.02  | 10.82 | 3.33  | 0.74  | 10.18 | 0.53  | 0.10   |
| -0.49 | 15.69 | 8.20  | 1.82  | 8.85  | 0.80  | -0.16  |
| -0.35 | 4.96  | 2.53  | -0.56 | 5.58  | 4.07  | -0.79  |
| -0.30 | 9.77  | 2.28  | 0.51  | 13.66 | 4.01  | 0.78   |
| -0.71 | 6.42  | 1.07  | -0.24 | 13.37 | 3.72  | 0.73   |
| -0.95 | 7.89  | 0.40  | 0.09  | 9.64  | 0.01  | 0.00   |
| -1.25 | 4.40  | 3.09  | -0.69 | 8.76  | 0.89  | -0.17  |
| -0.49 | 8.24  | 0.75  | 0.17  | 12.93 | 3.28  | 0.64   |
| -0.56 | 9.06  | 1.57  | 0.35  | 7.38  | 2.27  | -0.44  |
| 0.00  | 11.07 | 3.58  | 0.80  | 21.31 | 11.66 | 2.28   |
| -0.99 | 6.22  | 1.27  | -0.28 | 10.87 | 1.22  | 0.24   |
| -0.56 | 9.14  | 1.65  | 0.37  | 13.85 | 4.20  | 0.82   |
| -1.16 | 6.28  | 1.21  | -0.27 | 8.43  | 1.22  | -0.24  |
| -0.94 | 13.39 | 5.90  | 1.31  | 14.07 | 4.42  | 0.86   |
| -0.63 | 9.09  | 1.60  | 0.35  | 12.51 | 2.86  | 0.56   |
| -0.11 | 11.10 | 3.61  | 0.80  | 7.95  | 1.70  | -0.33  |
| -0.70 | 8.28  | 0.79  | 0.18  | 14.36 | 4.71  | 0.92   |
| 0.34  | 8.37  | 0.88  | 0.20  | 10.93 | 1.28  | 0.25   |
| -1.20 | 1.40  | 6.09  | -1.36 | 10.34 | 0.69  | 0.14   |
| 0.82  | 4.20  | 3.29  | -0.73 | 16.73 | 7.08  | 1.38   |
| 1.00  | 7.73  | 0.24  | 0.05  | 26.70 | 17.05 | 3.33   |
| -0.85 | 2.34  | 5.15  | -1.15 | 8.74  | 0.91  | -0.18  |
| 0.22  | 3.80  | 3.69  | -0.82 | 14.03 | 4.38  | 0.86   |
| -0.04 | 4.51  | 2.98  | -0.66 | 19.43 | 9.78  | 1.91   |
| -0.34 | 0.75  | 6.74  | -1.50 | 11.43 | 1.78  | 0.35   |
| -0.05 | 8.98  | 1.49  | 0.33  | 16.95 | 7.30  | 1.43   |
| -0.26 | 3.15  | 4.34  | -0.97 | 5.94  | 3.71  | -0.72  |
| 1.52  | 12.49 | 5.00  | 1.11  | 18.87 | 9.22  | 1.80   |
| -1.16 | 4.82  | 2.67  | -0.60 | 7.70  | 1.95  | -0.38  |
| -0.38 | 2.69  | 4.80  | -1.07 | 10.70 | 1.05  | 0.21   |
| -1.28 | 6.10  | 1.39  | -0.31 | 9.56  | 0.09  | -0.02  |

|       |       |       |       |       |       |        |
|-------|-------|-------|-------|-------|-------|--------|
| 0.74  | 8.17  | 0.68  | 0.15  | 17.12 | 7.47  | 1.46   |
| 0.05  | 10.16 | 2.67  | 0.59  | 10.00 | 0.35  | 0.07   |
| -0.94 | 9.87  | 2.38  | 0.53  | 16.03 | 6.38  | 1.25   |
| 0.29  | 17.68 | 10.19 | 2.27  | 24.87 | 15.22 | 2.98 y |
| 0.11  | 19.46 | 11.97 | 2.66  | 16.03 | 6.38  | 1.25   |
| 0.32  | 23.37 | 15.88 | 3.53  | 16.24 | 6.59  | 1.29   |
| 0.56  | 10.48 | 2.99  | 0.67  | 14.66 | 5.01  | 0.98   |
| -1.62 | 3.46  | 4.03  | -0.90 | 4.16  | 5.49  | -1.07  |
| -1.32 | 3.98  | 3.51  | -0.78 | 7.31  | 2.34  | -0.46  |
| -1.07 | 5.19  | 2.30  | -0.51 | 9.29  | 0.36  | -0.07  |
| -1.04 | 7.02  | 0.47  | -0.10 | 8.26  | 1.39  | -0.27  |
| -1.60 | 2.90  | 4.59  | -1.02 | 3.71  | 5.94  | -1.16  |
| -1.20 | 3.47  | 4.02  | -0.89 | 8.69  | 0.96  | -0.19  |
| -1.07 | 6.17  | 1.32  | -0.29 | 9.57  | 0.08  | -0.01  |
| -1.28 | 11.04 | 3.55  | 0.79  | 7.47  | 2.18  | -0.42  |
| -0.48 | 5.69  | 1.80  | -0.40 | 9.86  | 0.21  | 0.04   |
| -0.16 | 4.37  | 3.12  | -0.69 | 6.64  | 3.01  | -0.59  |
| -0.56 | 7.68  | 0.19  | 0.04  | 3.05  | 6.60  | -1.29  |
| -0.63 | 5.57  | 1.92  | -0.43 | 7.24  | 2.41  | -0.47  |
| -0.86 | 7.57  | 0.08  | 0.02  | 6.55  | 3.10  | -0.61  |
| -0.39 | 5.31  | 2.18  | -0.49 | 5.50  | 4.15  | -0.81  |
| -0.14 | 6.87  | 0.62  | -0.14 | 4.77  | 4.88  | -0.95  |
| -0.88 | 4.08  | 3.41  | -0.76 | 7.35  | 2.30  | -0.45  |
| 0.83  | 9.96  | 2.47  | 0.55  | 9.77  | 0.12  | 0.02   |
| 2.10  | 23.08 | 15.59 | 3.47  | 14.80 | 5.15  | 1.01 y |
| 1.26  | 5.02  | 2.47  | -0.55 | 7.60  | 2.05  | -0.40  |
| 1.43  | 12.74 | 5.25  | 1.17  | 7.07  | 2.58  | -0.50  |
| 1.45  | 3.22  | 4.27  | -0.95 | 13.29 | 3.64  | 0.71   |
| 2.09  | 6.79  | 0.70  | -0.16 | 15.02 | 5.37  | 1.05   |
| 2.30  | 5.65  | 1.84  | -0.41 | 19.48 | 9.83  | 1.92   |
| 2.16  | 4.53  | 2.96  | -0.66 | 18.49 | 8.84  | 1.73   |
| -0.65 | 1.18  | 6.31  | -1.40 | 4.86  | 4.79  | -0.94  |
| -0.68 | 0.72  | 6.77  | -1.51 | 6.93  | 2.72  | -0.53  |
| 0.78  | 4.90  | 2.59  | -0.58 | 8.59  | 1.06  | -0.21  |
| 0.00  | 4.86  | 2.63  | -0.58 | 9.54  | 0.11  | -0.02  |
| 0.00  | 2.52  | 4.97  | -1.11 | 11.68 | 2.03  | 0.40   |
| 1.25  | 9.25  | 1.76  | 0.39  | 9.82  | 0.17  | 0.03   |
| 1.58  | 7.14  | 0.35  | -0.08 | 10.03 | 0.38  | 0.07   |
| -0.67 | 4.58  | 2.91  | -0.65 | 6.43  | 3.22  | -0.63  |
| 2.21  | 7.77  | 0.28  | 0.06  | 10.89 | 1.24  | 0.24   |
| 2.86  | 10.67 | 3.18  | 0.71  | 14.50 | 4.85  | 0.95   |
| 0.67  | 7.42  | 0.07  | -0.02 | 6.64  | 3.01  | -0.59  |
| 0.93  | 14.99 | 7.50  | 1.67  | 21.38 | 11.73 | 2.29   |
| 1.34  | 9.79  | 2.30  | 0.51  | 10.31 | 0.65  | 0.13   |
| 0.85  | 13.35 | 5.86  | 1.30  | 12.65 | 3.00  | 0.59   |
| 0.96  | 15.56 | 8.07  | 1.79  | 15.44 | 5.79  | 1.13   |
| 0.43  | 14.55 | 7.06  | 1.57  | 13.12 | 3.47  | 0.68   |

|       |       |       |       |       |       |        |
|-------|-------|-------|-------|-------|-------|--------|
| -0.53 | 2.47  | 5.02  | -1.12 | 2.14  | 7.51  | -1.47  |
| 0.41  | 7.20  | 0.29  | -0.06 | 6.86  | 2.79  | -0.54  |
| -0.97 | 3.62  | 3.87  | -0.86 | 1.14  | 8.51  | -1.66  |
| 0.69  | 3.33  | 4.16  | -0.93 | 5.06  | 4.59  | -0.90  |
| 1.62  | 6.70  | 0.79  | -0.18 | 8.99  | 0.66  | -0.13  |
| 0.03  | 3.13  | 4.36  | -0.97 | 3.53  | 6.12  | -1.19  |
| 0.63  | 4.75  | 2.74  | -0.61 | 3.16  | 6.49  | -1.27  |
| 0.86  | 6.35  | 1.14  | -0.25 | 7.20  | 2.45  | -0.48  |
| 0.10  | 4.77  | 2.72  | -0.61 | 7.13  | 2.52  | -0.49  |
| 0.42  | 5.21  | 2.28  | -0.51 | 7.76  | 1.89  | -0.37  |
| 0.06  | 2.98  | 4.51  | -1.00 | 2.61  | 7.04  | -1.38  |
| 2.92  | 12.59 | 5.10  | 1.13  | 10.99 | 1.34  | 0.26   |
| 0.34  | 8.04  | 0.55  | 0.12  | 3.19  | 6.46  | -1.26  |
| 0.18  | 5.52  | 1.97  | -0.44 | 6.63  | 3.02  | -0.59  |
| -0.51 | 5.43  | 2.06  | -0.46 | 2.96  | 6.69  | -1.31  |
| 0.10  | 12.58 | 5.09  | 1.13  | 6.23  | 3.42  | -0.67  |
| 2.68  | 17.31 | 9.82  | 2.19  | 12.53 | 2.88  | 0.56 y |
| 2.25  | 18.51 | 11.02 | 2.45  | 13.30 | 3.65  | 0.71 y |
| 1.66  | 23.75 | 16.26 | 3.62  | 11.09 | 1.44  | 0.28   |
| 0.18  | 7.71  | 0.22  | 0.05  | 7.51  | 2.14  | -0.42  |
| 0.80  | 1.65  | 5.84  | -1.30 | 9.85  | 0.20  | 0.04   |
| -0.02 | 1.35  | 6.14  | -1.37 | 5.22  | 4.43  | -0.86  |
| 0.17  | 3.05  | 4.45  | -0.99 | 12.86 | 3.21  | 0.63   |
| 0.19  | 5.19  | 2.30  | -0.51 | 6.87  | 2.78  | -0.54  |
| 2.65  | 8.52  | 1.03  | 0.23  | 19.88 | 10.23 | 2.00   |
| 0.42  | 2.95  | 4.54  | -1.01 | 10.48 | 0.83  | 0.16   |
| -0.38 | 4.76  | 2.73  | -0.61 | 4.22  | 5.43  | -1.06  |
| 2.08  | 6.66  | 0.83  | -0.19 | 12.71 | 3.06  | 0.60   |
| 1.36  | 4.30  | 3.19  | -0.71 | 9.56  | 0.09  | -0.02  |
| 0.19  | 5.17  | 2.32  | -0.52 | 10.53 | 0.88  | 0.17   |
| 0.30  | 6.28  | 1.21  | -0.27 | 8.48  | 1.17  | -0.23  |
| 1.80  | 8.14  | 0.65  | 0.15  | 12.93 | 3.28  | 0.64   |
| -0.69 | 3.09  | 4.40  | -0.98 | 9.44  | 0.21  | -0.04  |
| 1.65  | 10.82 | 3.33  | 0.74  | 16.32 | 6.67  | 1.31   |
| -0.23 | 8.54  | 1.05  | 0.23  | 14.59 | 4.94  | 0.97   |
| 0.35  | 11.66 | 4.17  | 0.93  | 11.26 | 1.61  | 0.32   |
| -0.85 | 4.67  | 2.82  | -0.63 | 20.03 | 10.38 | 2.03   |
| -0.62 | 4.47  | 3.02  | -0.67 | 13.47 | 3.82  | 0.75   |
| 0.25  | 10.30 | 2.81  | 0.62  | 9.94  | 0.29  | 0.06   |
| -1.09 | 3.86  | 3.63  | -0.81 | 11.05 | 1.40  | 0.27   |
| 0.04  | 4.16  | 3.33  | -0.74 | 6.80  | 2.85  | -0.56  |
| -0.59 | 7.01  | 0.48  | -0.11 | 8.20  | 1.46  | -0.28  |
| 0.69  | 9.62  | 2.13  | 0.47  | 6.95  | 2.70  | -0.53  |
| -0.46 | 8.28  | 0.79  | 0.18  | 3.45  | 6.20  | -1.21  |
| 0.32  | 4.47  | 3.02  | -0.67 | 7.96  | 1.69  | -0.33  |
| 0.24  | 2.79  | 4.70  | -1.05 | 8.82  | 0.83  | -0.16  |
| 0.17  | 3.99  | 3.50  | -0.78 | 3.14  | 6.51  | -1.27  |

|             |              |              |             |              |              |               |
|-------------|--------------|--------------|-------------|--------------|--------------|---------------|
| 1.41        | 13.82        | 6.33         | 1.41        | 15.58        | 5.93         | 1.16          |
| -0.23       | 4.46         | 3.03         | -0.68       | 9.41         | 0.24         | -0.05         |
| 1.09        | 10.19        | 2.70         | 0.60        | 13.76        | 4.11         | 0.80          |
| -0.52       | 3.48         | 4.01         | -0.89       | 4.91         | 4.74         | -0.93         |
| 1.86        | 16.33        | 8.84         | 1.97        | 13.62        | 3.97         | 0.78          |
| <b>2.64</b> | <b>20.67</b> | <b>13.18</b> | <b>2.93</b> | <u>25.00</u> | <b>15.35</b> | <b>3.00</b> y |
| 0.75        | 13.46        | 5.97         | 1.33        | 7.06         | 2.59         | -0.50         |
| -0.35       | 12.10        | 4.61         | 1.02        | 19.20        | 9.55         | 1.87          |
| -0.45       | 3.44         | 4.05         | -0.90       | 10.13        | 0.48         | 0.09          |
| -1.10       | 6.42         | 1.07         | -0.24       | 6.90         | 2.75         | -0.54         |
| -0.80       | 6.89         | 0.60         | -0.13       | 8.62         | 1.03         | -0.20         |
| 0.47        | 11.63        | 4.14         | 0.92        | 12.05        | 2.40         | 0.47          |
| -0.34       | 8.36         | 0.87         | 0.19        | 11.22        | 1.57         | 0.31          |
| -0.94       | 10.67        | 3.18         | 0.71        | 13.10        | 3.45         | 0.68          |
| -0.93       | 6.34         | 1.15         | -0.26       | 15.59        | 5.94         | 1.16          |
| -0.44       | 8.63         | 1.14         | 0.25        | 21.32        | <b>11.67</b> | <b>2.28</b>   |
| 0.07        | 6.34         | 1.15         | -0.26       | 19.55        | 9.90         | 1.94          |
| -0.44       | 6.83         | 0.66         | -0.15       | 11.96        | 2.31         | 0.45          |
| -0.44       | 4.56         | 2.93         | -0.65       | 11.89        | 2.24         | 0.44          |
| -0.44       | 10.33        | 2.84         | 0.63        | 12.09        | 2.44         | 0.48          |
| -0.69       | 10.82        | 3.33         | 0.74        | 10.06        | 0.40         | 0.08          |
| 1.25        | 13.77        | 6.28         | 1.40        | 18.26        | 8.61         | 1.68          |
| 0.82        | 16.06        | 8.57         | 1.91        | 16.44        | 6.79         | 1.33          |
| 1.00        | 13.94        | 6.45         | 1.44        | 14.56        | 4.91         | 0.96          |
| 1.60        | 11.47        | 3.98         | 0.88        | 13.14        | 3.49         | 0.68          |
| 0.45        | 10.49        | 3.00         | 0.67        | 15.67        | 6.02         | 1.18          |
| 0.00        | 10.51        | 3.02         | 0.67        | 18.54        | 8.89         | 1.74          |
| 0.35        | 9.92         | 2.43         | 0.54        | 11.43        | 1.78         | 0.35          |
| 0.94        | 15.53        | 8.04         | 1.79        | 18.32        | 8.67         | 1.69          |
| 0.15        | 8.94         | 1.45         | 0.32        | 11.64        | 1.99         | 0.39          |
| <b>2.37</b> | <b>23.75</b> | <b>16.26</b> | <b>3.62</b> | <b>15.77</b> | <b>6.12</b>  | <b>1.20</b> y |
| 0.03        | 9.06         | 1.57         | 0.35        | 7.92         | 1.73         | -0.34         |
| <b>2.99</b> | <u>17.77</u> | <b>10.28</b> | <b>2.29</b> | <u>22.78</u> | <b>13.13</b> | <b>2.57</b> y |
| -0.81       | 8.67         | 1.18         | 0.26        | 7.40         | 2.25         | -0.44         |
| -0.60       | 9.03         | 1.54         | 0.34        | 3.44         | 6.21         | -1.21         |
| -1.03       | 11.34        | 3.85         | 0.86        | 5.48         | 4.17         | -0.81         |
| -1.28       | 8.70         | 1.21         | 0.27        | 4.56         | 5.09         | -0.99         |
| -0.55       | 8.94         | 1.45         | 0.32        | 6.48         | 3.17         | -0.62         |
| -0.57       | 10.23        | 2.74         | 0.61        | 8.44         | 1.21         | -0.24         |
| -0.87       | 9.26         | 1.77         | 0.39        | 5.20         | 4.45         | -0.87         |
| -0.21       | 12.74        | 5.25         | 1.17        | 5.49         | 4.16         | -0.81         |
| -0.33       | 12.06        | 4.57         | 1.02        | 3.60         | 6.05         | -1.18         |
| -0.65       | 10.33        | 2.84         | 0.63        | 5.52         | 4.13         | -0.81         |
| -0.68       | 5.41         | 2.08         | -0.46       | 3.81         | 5.84         | -1.14         |
| 0.09        | 15.66        | 8.17         | 1.82        | 8.84         | 0.81         | -0.16         |
| 0.71        | 8.11         | 0.62         | 0.14        | 5.80         | 3.85         | -0.75         |
| 0.81        | 17.34        | <b>9.85</b>  | <b>2.19</b> | 6.98         | 2.67         | -0.52         |



|       |       |      |       |       |      |       |
|-------|-------|------|-------|-------|------|-------|
| -0.07 | 5.88  | 1.61 | -0.36 | 6.78  | 2.87 | -0.56 |
| -0.08 | 10.69 | 3.20 | 0.71  | 7.52  | 2.13 | -0.42 |
| -0.46 | 6.32  | 1.17 | -0.26 | 4.99  | 4.66 | -0.91 |
| 0.67  | 13.53 | 6.04 | 1.34  | 4.98  | 4.67 | -0.91 |
| 1.25  | 12.89 | 5.40 | 1.20  | 6.51  | 3.14 | -0.61 |
| -0.50 | 2.40  | 5.09 | -1.13 | 3.30  | 6.35 | -1.24 |
| -0.79 | 3.44  | 4.05 | -0.90 | 1.99  | 7.66 | -1.50 |
| 0.12  | 8.24  | 0.75 | 0.17  | 2.42  | 7.23 | -1.41 |
| -0.06 | 5.60  | 1.89 | -0.42 | 2.17  | 7.48 | -1.46 |
| -1.01 | 1.86  | 5.63 | -1.25 | 3.55  | 6.10 | -1.19 |
| -0.93 | 1.79  | 5.70 | -1.27 | 2.05  | 7.60 | -1.48 |
| 0.82  | 6.62  | 0.87 | -0.19 | 5.77  | 3.88 | -0.76 |
| -0.19 | 5.47  | 2.02 | -0.45 | 7.57  | 2.08 | -0.41 |
| 1.22  | 7.07  | 0.42 | -0.09 | 3.64  | 6.01 | -1.17 |
| 0.46  | 7.09  | 0.40 | -0.09 | 2.65  | 7.00 | -1.37 |
| 1.47  | 6.76  | 0.73 | -0.16 | 3.79  | 5.86 | -1.14 |
| -0.15 | 5.20  | 2.29 | -0.51 | 4.56  | 5.09 | -0.99 |
| 1.51  | 6.63  | 0.86 | -0.19 | 4.83  | 4.82 | -0.94 |
| 1.66  | 11.49 | 4.00 | 0.89  | 11.16 | 1.51 | 0.30  |
| 1.00  | 8.13  | 0.64 | 0.14  | 5.05  | 4.60 | -0.90 |
| 0.80  | 3.58  | 3.91 | -0.87 | 4.40  | 5.25 | -1.02 |
| 1.63  | 2.69  | 4.80 | -1.07 | 4.95  | 4.70 | -0.92 |
| -0.87 | 5.69  | 1.80 | -0.40 | 6.77  | 2.88 | -0.56 |
| 2.69  | 15.06 | 7.57 | 1.68  | 12.86 | 3.21 | 0.63  |
| 1.23  | 9.13  | 1.64 | 0.36  | 11.25 | 1.60 | 0.31  |
| 1.18  | 8.25  | 0.76 | 0.17  | 5.81  | 3.84 | -0.75 |
| -1.17 | 2.04  | 5.45 | -1.21 | 5.25  | 4.40 | -0.86 |
| 0.10  | 8.59  | 1.10 | 0.24  | 19.33 | 9.68 | 1.89  |
| -0.53 | 2.23  | 5.26 | -1.17 | 7.55  | 2.10 | -0.41 |
| 0.93  | 6.72  | 0.77 | -0.17 | 6.75  | 2.90 | -0.57 |
| -0.45 | 1.64  | 5.85 | -1.30 | 5.12  | 4.53 | -0.88 |
| -0.61 | 1.78  | 5.71 | -1.27 | 8.26  | 1.39 | -0.27 |
| -0.28 | 5.51  | 1.98 | -0.44 | 8.64  | 1.01 | -0.20 |
| -0.22 | 6.24  | 1.25 | -0.28 | 5.00  | 4.65 | -0.91 |
| 0.29  | 5.19  | 2.30 | -0.51 | 5.84  | 3.81 | -0.74 |
| 1.67  | 4.88  | 2.61 | -0.58 | 8.11  | 1.54 | -0.30 |
| 0.06  | 3.74  | 3.75 | -0.83 | 9.72  | 0.07 | 0.02  |
| 1.41  | 17.22 | 9.73 | 2.16  | 12.66 | 3.01 | 0.59  |
| 2.30  | 17.34 | 9.85 | 2.19  | 10.21 | 0.56 | 0.11  |
| -0.06 | 6.34  | 1.15 | -0.26 | 15.17 | 5.52 | 1.08  |
| -0.37 | 5.17  | 2.32 | -0.52 | 8.36  | 1.29 | -0.25 |
| 0.37  | 7.18  | 0.31 | -0.07 | 6.34  | 3.31 | -0.65 |
| 0.63  | 7.99  | 0.50 | 0.11  | 8.99  | 0.66 | -0.13 |
| 1.17  | 13.45 | 5.96 | 1.33  | 15.26 | 5.61 | 1.10  |
| 1.69  | 9.13  | 1.64 | 0.36  | 17.74 | 8.09 | 1.58  |
| 1.11  | 3.61  | 3.88 | -0.86 | 6.25  | 3.40 | -0.66 |
| -0.23 | 3.45  | 4.04 | -0.90 | 5.54  | 4.11 | -0.80 |

|             |              |              |             |              |              |               |
|-------------|--------------|--------------|-------------|--------------|--------------|---------------|
| -0.38       | 1.77         | 5.72         | -1.27       | 9.05         | 0.60         | -0.12         |
| 0.53        | 4.09         | 3.40         | -0.76       | 8.29         | 1.36         | -0.26         |
| <b>3.86</b> | <b>15.54</b> | <b>8.05</b>  | <b>1.79</b> | <b>20.78</b> | <b>11.13</b> | <b>2.18</b> y |
| -0.06       | 5.27         | 2.22         | -0.49       | 14.35        | 4.70         | 0.92          |
| 0.31        | 3.99         | 3.50         | -0.78       | 12.60        | 2.95         | 0.58          |
| -0.24       | 3.56         | 3.93         | -0.87       | 12.45        | 2.80         | 0.55          |
| 0.93        | 6.71         | 0.78         | -0.17       | 15.96        | 6.31         | 1.23          |
| 0.46        | 3.76         | 3.73         | -0.83       | 16.25        | 6.60         | 1.29          |
| 0.04        | 11.98        | 4.49         | 1.00        | 13.91        | 4.26         | 0.83          |
| <b>2.16</b> | <b>8.65</b>  | <b>1.16</b>  | <b>0.26</b> | <b>22.02</b> | <b>12.37</b> | <b>2.42</b> y |
| <b>3.16</b> | <b>14.79</b> | <b>7.30</b>  | <b>1.62</b> | <b>30.48</b> | <b>20.83</b> | <b>4.07</b> y |
| 0.01        | 6.48         | 1.01         | -0.23       | 15.31        | 5.66         | 1.11          |
| 1.26        | 12.36        | 4.87         | 1.08        | 27.29        | <b>17.64</b> | <b>3.45</b>   |
| -0.29       | 4.19         | 3.30         | -0.74       | 10.01        | 0.36         | 0.07          |
| 0.89        | 11.83        | 4.34         | 0.97        | 23.75        | <b>14.10</b> | <b>2.76</b>   |
| 1.39        | 15.90        | 8.41         | 1.87        | 31.90        | <b>22.25</b> | <b>4.35</b>   |
| -0.75       | 10.51        | 3.02         | 0.67        | 12.63        | 2.98         | 0.58          |
| 0.65        | <b>21.18</b> | <b>13.69</b> | <b>3.05</b> | <b>23.85</b> | <b>14.20</b> | <b>2.78</b> y |
| -0.40       | 12.79        | 5.30         | 1.18        | 15.98        | 6.33         | 1.24          |
| -0.92       | 6.14         | 1.35         | -0.30       | 7.02         | 2.63         | -0.51         |
| 0.22        | 14.26        | 6.77         | 1.51        | 9.15         | 0.50         | -0.10         |
| 0.29        | 10.05        | 2.56         | 0.57        | 11.92        | 2.27         | 0.45          |
| 0.34        | 7.90         | 0.41         | 0.09        | 12.21        | 2.56         | 0.50          |
| 0.46        | 14.71        | 7.22         | 1.61        | 19.30        | 9.65         | 1.89          |
| -0.87       | 5.72         | 1.77         | -0.39       | 7.56         | 2.09         | -0.41         |
| -1.05       | 7.49         | 0.00         | 0.00        | 11.31        | 1.66         | 0.32          |
| -0.65       | 10.00        | 2.51         | 0.56        | 11.67        | 2.02         | 0.40          |
| 0.42        | 9.68         | 2.19         | 0.49        | 14.15        | 4.50         | 0.88          |
| -0.37       | 8.95         | 1.46         | 0.32        | 14.14        | 4.49         | 0.88          |
| -0.11       | 8.18         | 0.69         | 0.15        | 14.24        | 4.59         | 0.90          |
| 1.92        | 14.14        | 6.65         | 1.48        | 22.92        | <b>13.27</b> | <b>2.59</b>   |
| 0.49        | 14.14        | 6.65         | 1.48        | 17.21        | 7.56         | 1.48          |
| 0.10        | 9.28         | 1.79         | 0.40        | 9.64         | 0.01         | 0.00          |
| -0.07       | 5.56         | 1.93         | -0.43       | 10.95        | 1.30         | 0.25          |
| 1.74        | 11.63        | 4.14         | 0.92        | 24.53        | <b>14.88</b> | <b>2.91</b>   |
| 0.38        | 9.00         | 1.51         | 0.34        | 11.42        | 1.77         | 0.35          |
| -0.82       | 11.62        | 4.13         | 0.92        | 15.12        | 5.47         | 1.07          |
| 1.26        | 10.87        | 3.38         | 0.75        | 15.14        | 5.49         | 1.07          |
| -0.59       | 6.27         | 1.22         | -0.27       | 10.28        | 0.63         | 0.12          |
|             | 7.49         | 3.04         |             | 9.65         | 3.46         |               |
|             |              | 9.11         |             |              | 10.37        |               |
|             |              | 4.49         |             |              | 5.12         |               |
| 54.78       |              | 49.41        |             |              |              |               |
| 53.47       |              | 48.23        |             |              |              |               |
| 52.04       |              | 39.98        |             |              |              |               |
| 46.22       |              | 29.80        |             |              |              |               |
| 51.63       |              | 41.85        |             |              |              |               |

|       |       |
|-------|-------|
| 3.78  | 9.07  |
| 6.66  | 11.02 |
| 6.94  | 3.40  |
| 7.97  | 9.37  |
| 9.42  | 8.01  |
| 7.75  | 7.95  |
| 1.25  | 3.27  |
| 11.33 | 27.21 |
| 3.75  | 9.81  |
| 15.08 | 37.02 |
| 43.88 | 33.90 |
| 0.34  | 1.09  |
| 0.66  | -0.09 |

|       |       |
|-------|-------|
| 4.83  | 28.03 |
| 18.25 | 9.68  |
| 3.00  | 6.22  |
| 11.02 | 14.06 |

|          |     |                        |                    | <u>% inf</u> | <u>abs dev</u> | <u>robust Z</u> |
|----------|-----|------------------------|--------------------|--------------|----------------|-----------------|
| 50005.00 | A02 | M-026243- olfactory re | 26740.00 OR1J2     | 9.05         | 1.83           | 0.45            |
| 50005.00 | A04 | M-005738- taste recep  | 80835.00 TAS1R1    | 13.28        | 6.06           | 1.49            |
| 50005.00 | A05 | M-005651- latrophilin  | 23266.00 LPHN2     | 3.52         | 3.70           | -0.91           |
| 50005.00 | A06 | M-005737- trace amin   | 134860.00 TAAR9    | 3.40         | 3.82           | -0.94           |
| 50005.00 | A07 | M-005652- latrophilin  | 23284.00 LPHN3     | 4.72         | 2.50           | -0.62           |
| 50005.00 | A08 | M-005736- trace amin   | 134864.00 TAAR1    | 6.23         | 0.99           | -0.24           |
| 50005.00 | A09 | M-005653- leukotriene  | 1241.00 LTB4R      | 2.75         | 4.47           | -1.10           |
| 50005.00 | A10 | M-005735- tachykinin   | 6870.00 TACR3      | 4.65         | 2.57           | -0.64           |
| 50005.00 | A11 | M-005654- leukotriene  | 56413.00 LTB4R2    | 6.70         | 0.52           | -0.13           |
| 50005.00 | A12 | M-005734- tachykinin   | 6865.00 TACR2      | 3.24         | 3.98           | -0.98           |
| 50005.00 | A13 | M-003684- MAS1 oncc    | 4142.00 MAS1       | 4.66         | 2.56           | -0.63           |
| 50005.00 | A14 | M-005733- tachykinin   | 6869.00 TACR1      | 6.57         | 0.65           | -0.16           |
| 50005.00 | A15 | M-005655- MAS1 oncc    | 116511.00 MAS1L    | 4.74         | 2.48           | -0.61           |
| 50005.00 | A16 | M-005732- trace amin   | 319100.00 TAAR6    | 6.22         | 1.00           | -0.25           |
| 50005.00 | A17 | M-005656- G protein-c  | 84059.00 GPR98     | 3.66         | 3.56           | -0.88           |
| 50005.00 | A18 | M-005731- somatostat   | 6755.00 SSTR5      | 4.29         | 2.93           | -0.72           |
| 50005.00 | A19 | M-010652- family with  | 23344.00 FAM62A    | 3.15         | 4.07           | -1.01           |
| 50005.00 | A20 | M-005730- somatostat   | 6754.00 SSTR4      | 9.77         | 2.55           | 0.63            |
| 50005.00 | A21 | M-005657- melanocor    | 4157.00 MC1R       | 6.65         | 0.57           | -0.14           |
| 50005.00 | A23 | M-005658- melanocor    | 4158.00 MC2R       | 5.15         | 2.07           | -0.51           |
| 50005.00 | B05 | M-005739- taste recep  | 80834.00 TAS1R2    | 5.10         | 2.12           | -0.52           |
| 50005.00 | B07 | M-013246- taste recep  | 50834.00 TAS2R1    | 2.92         | 4.30           | -1.06           |
| 50005.00 | B09 | M-012883- taste recep  | 50839.00 TAS2R10   | 11.01        | 3.79           | 0.94            |
| 50005.00 | B11 | M-012882- taste recep  | 50838.00 TAS2R13   | 5.59         | 1.63           | -0.40           |
| 50005.00 | B13 | M-010016- taste recep  | 50840.00 TAS2R14   | 4.58         | 2.64           | -0.65           |
| 50005.00 | B15 | M-013103- taste recep  | 50833.00 TAS2R16   | 7.58         | 0.36           | 0.09            |
| 50005.00 | B17 | M-010109- taste recep  | 50831.00 TAS2R3    | 15.14        | 7.92           | 1.95            |
| 50005.00 | B19 | M-017680- taste recep  | 259285.00 TAS2R39  | 11.06        | 3.84           | 0.95            |
| 50005.00 | B21 | M-013102- taste recep  | 50832.00 TAS2R4    | 14.38        | 7.16           | 1.77            |
| 50005.00 | B23 | M-017662- taste recep  | 259286.00 TAS2R40  | 17.52        | <b>10.30</b>   | <b>2.54</b>     |
| 50005.00 | C02 | M-005729- somatostat   | 6753.00 SSTR3      | 2.25         | 4.97           | -1.23           |
| 50005.00 | C04 | M-005728- somatostat   | 6752.00 SSTR2      | 9.72         | 2.50           | 0.62            |
| 50005.00 | C05 | M-005659- melanocor    | 4159.00 MC3R       | 2.63         | 4.59           | -1.13           |
| 50005.00 | C06 | M-003711- somatostat   | 6751.00 SSTR1      | 5.04         | 2.18           | -0.54           |
| 50005.00 | C07 | M-005660- melanocor    | 4160.00 MC4R       | 8.53         | 1.31           | 0.32            |
| 50005.00 | C08 | M-020198- somatostat   | 6750.00 SST        | 15.26        | 8.04           | 1.98            |
| 50005.00 | C09 | M-005661- melanocor    | 4161.00 MC5R       | 7.26         | 0.04           | 0.01            |
| 50005.00 | C10 | M-005727- G protein-c  | 54328.00 GPR173    | 15.67        | <b>8.45</b>    | <b>2.08</b>     |
| 50005.00 | C11 | M-003978- olfactory re | 143503.00 OR51E1   | 16.23        | <b>9.01</b>    | <b>2.22</b>     |
| 50005.00 | C12 | M-010620- sortilin 1   | 6272.00 SORT1      | 5.25         | 1.97           | -0.49           |
| 50005.00 | C13 | M-016259- GLI pathog   | 256710.00 GLIPR1L1 | 3.81         | 3.41           | -0.84           |
| 50005.00 | C14 | M-005726- smoothene    | 6608.00 SMO        | 7.37         | 0.15           | 0.04            |
| 50005.00 | C15 | M-008997- olfactory re | 284521.00 OR2L13   | 7.53         | 0.31           | 0.08            |
| 50005.00 | C16 | M-005724- secretin rei | 6344.00 SCTR       | 3.23         | 3.99           | -0.98           |
| 50005.00 | C17 | M-012641- motilin      | 4295.00 MLN        | 6.11         | 1.11           | -0.27           |
| 50005.00 | C18 | M-004774- relaxin/insi | 51289.00 RXFP3     | 10.66        | 3.44           | 0.85            |

|              |                        |           |         |       |       |       |
|--------------|------------------------|-----------|---------|-------|-------|-------|
| 50005.00 C19 | M-005662- MAS-relate   | 219928.00 | MRGPRF  | 9.44  | 2.22  | 0.55  |
| 50005.00 C20 | M-005723- retinal pign | 10692.00  | RRH     | 14.41 | 7.19  | 1.77  |
| 50005.00 C21 | M-005665- MAS-relate   | 259249.00 | MRGPRX1 | 9.17  | 1.95  | 0.48  |
| 50005.00 C23 | M-005666- MAS-relate   | 117194.00 | MRGPRX2 | 10.77 | 3.55  | 0.87  |
| 50005.00 D05 | M-017775- taste recep  | 259287.00 | TAS2R41 | 4.10  | 3.12  | -0.77 |
| 50005.00 D07 | M-017828- taste recep  | 259292.00 | TAS2R46 | 3.23  | 3.99  | -0.99 |
| 50005.00 D09 | M-017830- taste recep  | 259294.00 | TAS2R48 | 6.68  | 0.54  | -0.13 |
| 50005.00 D11 | M-013385- taste recep  | 54429.00  | TAS2R5  | 14.29 | 7.07  | 1.74  |
| 50005.00 D13 | M-018268- taste recep  | 338398.00 | TAS2R60 | 10.83 | 3.61  | 0.89  |
| 50005.00 D15 | M-010015- taste recep  | 50837.00  | TAS2R7  | 17.96 | 10.74 | 2.65  |
| 50005.00 D17 | M-010014- taste recep  | 50836.00  | TAS2R8  | 8.13  | 0.91  | 0.23  |
| 50005.00 D19 | M-010018- taste recep  | 50835.00  | TAS2R9  | 7.84  | 0.62  | 0.15  |
| 50005.00 D21 | M-017431- transducin   | 10607.00  | TBL3    | 5.01  | 2.21  | -0.55 |
| 50005.00 D23 | M-005740- thromboxa    | 6915.00   | TBXA2R  | 5.87  | 1.35  | -0.33 |
| 50005.00 E02 | M-017459- retinal oute | 6094.00   | ROM1    | 4.05  | 3.17  | -0.78 |
| 50005.00 E04 | M-004662- G protein-c  | 6011.00   | GRK1    | 9.36  | 2.14  | 0.53  |
| 50005.00 E05 | M-005667- MAS-relate   | 117195.00 | MRGPRX3 | 6.63  | 0.59  | -0.15 |
| 50005.00 E06 | M-005722- rhodopsin    | 6010.00   | RHO     | 2.84  | 4.38  | -1.08 |
| 50005.00 E07 | M-005668- MAS-relate   | 117196.00 | MRGPRX4 | 7.64  | 0.42  | 0.10  |
| 50005.00 E08 | M-009711- regulator o  | 8787.00   | RGS9    | 12.48 | 5.26  | 1.30  |
| 50005.00 E09 | M-011035- membrane     | 2206.00   | MS4A2   | 4.29  | 2.93  | -0.72 |
| 50005.00 E10 | M-015720- regulator o  | 6000.00   | RGS7    | 9.13  | 1.91  | 0.47  |
| 50005.00 E11 | M-005669- melatonin    | 4543.00   | MTNR1A  | 4.93  | 2.29  | -0.57 |
| 50005.00 E12 | M-019082- regulator o  | 9628.00   | RGS6    | 10.66 | 3.44  | 0.85  |
| 50005.00 E13 | M-005670- melatonin    | 4544.00   | MTNR1B  | 8.31  | 1.09  | 0.27  |
| 50005.00 E14 | M-008384- regulator o  | 8490.00   | RGS5    | 7.31  | 0.09  | 0.02  |
| 50005.00 E15 | M-003687- neuromedi    | 4829.00   | NMBR    | 5.21  | 2.02  | -0.50 |
| 50005.00 E16 | M-009900- regulator o  | 5999.00   | RGS4    | 13.11 | 5.89  | 1.45  |
| 50005.00 E17 | M-005671- neuromedi    | 56923.00  | NMUR2   | 6.96  | 0.26  | -0.06 |
| 50005.00 E18 | M-008302- regulator o  | 5998.00   | RGS3    | 10.27 | 3.05  | 0.75  |
| 50005.00 E19 | M-005354- natriuretic  | 4881.00   | NPR1    | 6.90  | 0.32  | -0.08 |
| 50005.00 E20 | M-008452- regulator o  | 8601.00   | RGS20   | 5.73  | 1.49  | -0.37 |
| 50005.00 E21 | M-005355- natriuretic  | 4882.00   | NPR2    | 12.43 | 5.21  | 1.29  |
| 50005.00 E23 | M-008049- natriuretic  | 4883.00   | NPR3    | 10.95 | 3.73  | 0.92  |
| 50005.00 F05 | M-005741- oxoeicosan   | 165140.00 | OXER1   | 2.70  | 4.52  | -1.12 |
| 50005.00 F07 | M-004055- thyrotropir  | 29953.00  | TRHDE   | 3.82  | 3.40  | -0.84 |
| 50005.00 F09 | M-005747- thyrotropir  | 7201.00   | TRHR    | 3.92  | 3.30  | -0.81 |
| 50005.00 F11 | M-012553- thyroid stir | 7252.00   | TSHB    | 6.28  | 0.94  | -0.23 |
| 50005.00 F13 | M-005748- thyroid stir | 7253.00   | TSHR    | 6.87  | 0.35  | -0.09 |
| 50005.00 F15 | M-021383- vasoactive   | 7432.00   | VIP     | 4.82  | 2.40  | -0.59 |
| 50005.00 F17 | M-005749- vasoactive   | 7433.00   | VIPR1   | 4.00  | 3.22  | -0.80 |
| 50005.00 F19 | M-005750- vasoactive   | 7434.00   | VIPR2   | 12.66 | 5.44  | 1.34  |
| 50005.00 F21 | M-013177- vomeronas    | 57191.00  | VN1R1   | 11.66 | 4.44  | 1.09  |
| 50005.00 F23 | M-008957- vomeronas    | 317701.00 | VN1R2   | 9.42  | 2.20  | 0.54  |
| 50005.00 G02 | M-009887- regulator o  | 5997.00   | RGS2    | 0.37  | 6.85  | -1.69 |
| 50005.00 G04 | M-019997- GIPC PDZ d   | 10755.00  | GIPC1   | 2.59  | 4.63  | -1.14 |
| 50005.00 G05 | M-017695- neuropepti   | 4852.00   | NPY     | 5.04  | 2.18  | -0.54 |

|              |                        |                 |       |              |             |
|--------------|------------------------|-----------------|-------|--------------|-------------|
| 50005.00 G06 | M-008896- regulator o  | 10287.00 RGS19  | 5.68  | 1.54         | -0.38       |
| 50005.00 G07 | M-005672- neuropepti   | 4886.00 NPY1R   | 5.87  | 1.35         | -0.33       |
| 50005.00 G08 | M-008386- regulator o  | 6004.00 RGS16   | 4.83  | 2.39         | -0.59       |
| 50005.00 G09 | M-005673- neuropepti   | 4887.00 NPY2R   | 3.22  | 4.00         | -0.99       |
| 50005.00 G10 | M-008826- regulator o  | 10636.00 RGS14  | 4.62  | 2.60         | -0.64       |
| 50005.00 G11 | M-005674- neuropepti   | 4889.00 NPY5R   | 9.39  | 2.17         | 0.53        |
| 50005.00 G12 | M-008610- regulator o  | 6002.00 RGS12   | 9.77  | 2.55         | 0.63        |
| 50005.00 G13 | M-005675- neurotensi   | 4923.00 NTSR1   | 8.60  | 1.38         | 0.34        |
| 50005.00 G14 | M-009419- regulator o  | 8786.00 RGS11   | 4.92  | 2.30         | -0.57       |
| 50005.00 G15 | M-005676- neurotensi   | 23620.00 NTSR2  | 13.91 | 6.69         | 1.65        |
| 50005.00 G16 | M-009501- regulator o  | 5996.00 RGS1    | 19.05 | <b>11.83</b> | <b>2.92</b> |
| 50005.00 G17 | M-005678- opsin 1 (co  | 5956.00 OPN1LW  | 3.58  | 3.64         | -0.90       |
| 50005.00 G18 | M-005721- retinal G pr | 5995.00 RGR     | 13.40 | 6.18         | 1.52        |
| 50005.00 G19 | M-005679- opsin 1 (co  | 2652.00 OPN1MW  | 5.20  | 2.02         | -0.50       |
| 50005.00 G20 | M-011102- peripherin   | 5961.00 PRPH2   | 10.78 | 3.56         | 0.88        |
| 50005.00 G21 | M-005680- opsin 1 (co  | 611.00 OPN1SW   | 10.55 | 3.33         | 0.82        |
| 50005.00 G23 | M-005681- opsin 3 (en  | 23596.00 OPN3   | 10.74 | 3.52         | 0.87        |
| 50005.00 H05 | M-017659- vomeronas    | 317702.00 VN1R3 | 1.01  | 6.21         | -1.53       |
| 50005.00 H07 | M-017651- vomeronas    | 317703.00 VN1R4 | 2.84  | 4.38         | -1.08       |
| 50005.00 H09 | M-017642- vomeronas    | 317705.00 VN1R5 | 4.49  | 2.73         | -0.67       |
| 50005.00 H11 | M-013375- WD repeat    | 54554.00 WDR5B  | 2.51  | 4.71         | -1.16       |
| 50005.00 H13 | M-005751- chemokine    | 2829.00 XCR1    | 2.83  | 4.39         | -1.08       |
| 50005.00 H15 | M-005752- xenotropic   | 9213.00 XPR1    | 6.67  | 0.55         | -0.14       |
| 50005.00 I02 | M-009719- RAS, dexan   | 51655.00 RASD1  | 3.82  | 3.40         | -0.84       |
| 50005.00 I04 | M-003700- receptor (C  | 10267.00 RAMP1  | 8.82  | 1.60         | 0.40        |
| 50005.00 I05 | M-005682- opsin 4 (me  | 94233.00 OPN4   | 4.76  | 2.46         | -0.61       |
| 50005.00 I06 | M-009778- protein tyr  | 5777.00 PTPN6   | 5.02  | 2.20         | -0.54       |
| 50005.00 I07 | M-005683- opioid rece  | 4985.00 OPRD1   | 9.55  | 2.33         | 0.58        |
| 50005.00 I08 | M-005718- parathyroi   | 5746.00 PTHR2   | 10.22 | 3.00         | 0.74        |
| 50005.00 I09 | M-005684- opioid rece  | 4986.00 OPRK1   | 7.65  | 0.43         | 0.11        |
| 50005.00 I10 | M-005717- parathyroi   | 5745.00 PTHR1   | 10.61 | 3.39         | 0.84        |
| 50005.00 I11 | M-005685- opiate rece  | 4987.00 OPRL1   | 10.38 | 3.16         | 0.78        |
| 50005.00 I12 | M-012547- parathyroi   | 5741.00 PTH     | 19.00 | <b>11.78</b> | <b>2.91</b> |
| 50005.00 I13 | M-005686- opioid rece  | 4988.00 OPRM1   | 9.67  | 2.45         | 0.60        |
| 50005.00 I14 | M-005716- prostaglan   | 5739.00 PTGIR   | 6.28  | 0.94         | -0.23       |
| 50005.00 I15 | M-020479- olfactory re | 26539.00 OR10H1 | 5.37  | 1.85         | -0.46       |
| 50005.00 I16 | M-005715- prostaglan   | 5737.00 PTGFR   | 9.12  | 1.90         | 0.47        |
| 50005.00 I17 | M-008904- olfactory re | 26538.00 OR10H2 | 5.76  | 1.46         | -0.36       |
| 50005.00 I18 | M-005714- prostaglan   | 5734.00 PTGER4  | 10.02 | 2.80         | 0.69        |
| 50005.00 I19 | M-008901- olfactory re | 26476.00 OR10J1 | 6.18  | 1.04         | -0.26       |
| 50005.00 I20 | M-005713- prostaglan   | 5733.00 PTGER3  | 11.71 | 4.49         | 1.11        |
| 50005.00 I21 | M-008813- olfactory re | 26531.00 OR11A1 | 11.41 | 4.19         | 1.03        |
| 50005.00 I23 | M-008814- olfactory re | 26529.00 OR12D2 | 6.80  | 0.42         | -0.10       |
| 50005.00 K02 | M-005712- prostaglan   | 5732.00 PTGER2  | 3.65  | 3.57         | -0.88       |
| 50005.00 K04 | M-005711- prostaglan   | 5731.00 PTGER1  | 3.96  | 3.26         | -0.81       |
| 50005.00 K05 | M-009796- olfactory re | 81797.00 OR12D3 | 11.54 | 4.32         | 1.07        |
| 50005.00 K06 | M-005710- prostaglan   | 5729.00 PTGDR   | 5.14  | 2.08         | -0.51       |

|              |                        |                 |       |       |       |
|--------------|------------------------|-----------------|-------|-------|-------|
| 50005.00 K07 | M-008911- olfactory re | 8383.00 OR1A1   | 5.58  | 1.64  | -0.41 |
| 50005.00 K08 | M-005709- platelet-aci | 5724.00 PTAFR   | 3.25  | 3.97  | -0.98 |
| 50005.00 K09 | M-008912- olfactory re | 26189.00 OR1A2  | 7.94  | 0.72  | 0.18  |
| 50005.00 K10 | M-021325- proline-rich | 5545.00 PRB4    | 15.21 | 7.99  | 1.97  |
| 50005.00 K11 | M-021656- olfactory re | 26188.00 OR1C1  | 6.52  | 0.70  | -0.17 |
| 50005.00 K12 | M-005708- pancreatic   | 5540.00 PPYR1   | 6.81  | 0.41  | -0.10 |
| 50005.00 K13 | M-009079- olfactory re | 4991.00 OR1D2   | 11.16 | 3.94  | 0.97  |
| 50005.00 K14 | M-005707- trace amin   | 9038.00 TAAR5   | 8.79  | 1.57  | 0.39  |
| 50005.00 K15 | M-009066- olfactory re | 8385.00 OR1D4   | 4.95  | 2.27  | -0.56 |
| 50005.00 K16 | M-005274- phosphoin    | 5294.00 PIK3CG  | 7.08  | 0.14  | -0.04 |
| 50005.00 K17 | M-020461- olfactory re | 8386.00 OR1D5   | 14.43 | 7.21  | 1.78  |
| 50005.00 K18 | M-003019- phosphoin    | 5291.00 PIK3CB  | 16.31 | 9.09  | 2.24  |
| 50005.00 K19 | M-009038- olfactory re | 8387.00 OR1E1   | 21.73 | 14.51 | 3.58  |
| 50005.00 K20 | M-013394- phosducin-   | 5082.00 PDCL    | 26.75 | 19.53 | 4.82  |
| 50005.00 K21 | M-012609- olfactory re | 8388.00 OR1E2   | 17.43 | 10.21 | 2.52  |
| 50005.00 K23 | M-008798- olfactory re | 4992.00 OR1F1   | 20.97 | 13.75 | 3.39  |
| 50005.00 M02 | M-013000- phosducin    | 5132.00 PDC     | 3.85  | 3.37  | -0.83 |
| 50005.00 M04 | M-005695- purinergic i | 286530.00 P2RY8 | 6.92  | 0.30  | -0.07 |
| 50005.00 M05 | M-009068- olfactory re | 8390.00 OR1G1   | 17.28 | 10.06 | 2.48  |
| 50005.00 M06 | M-004579- pyrimidine   | 5031.00 P2RY6   | 6.04  | 1.18  | -0.29 |
| 50005.00 M07 | M-009046- olfactory re | 79541.00 OR2A4  | 11.84 | 4.62  | 1.14  |
| 50005.00 M08 | M-004603- purinergic i | 10161.00 P2RY5  | 8.86  | 1.64  | 0.41  |
| 50005.00 M09 | M-008800- olfactory re | 81697.00 OR2B2  | 9.95  | 2.73  | 0.67  |
| 50005.00 M10 | M-005693- pyrimidine   | 5030.00 P2RY4   | 7.95  | 0.73  | 0.18  |
| 50005.00 M11 | M-008801- olfactory re | 4993.00 OR2C1   | 3.93  | 3.29  | -0.81 |
| 50005.00 M12 | M-003688- purinergic i | 5029.00 P2RY2   | 9.56  | 2.34  | 0.58  |
| 50005.00 M13 | M-021427- olfactory re | 81472.00 OR2C3  | 8.09  | 0.87  | 0.21  |
| 50005.00 M14 | M-005692- purinergic i | 64805.00 P2RY12 | 10.35 | 3.13  | 0.77  |
| 50005.00 M15 | M-020188- olfactory re | 26211.00 OR2F1  | 14.22 | 7.00  | 1.73  |
| 50005.00 M16 | M-005691- purinergic i | 5032.00 P2RY11  | 8.22  | 1.00  | 0.25  |
| 50005.00 M17 | M-018165- olfactory re | 26716.00 OR2H1  | 16.66 | 9.44  | 2.33  |
| 50005.00 M18 | M-005690- purinergic i | 27334.00 P2RY10 | 12.31 | 5.09  | 1.26  |
| 50005.00 M19 | M-008264- olfactory re | 7932.00 OR2H2   | 3.02  | 4.20  | -1.04 |
| 50005.00 M20 | M-005689- purinergic i | 5028.00 P2RY1   | 13.31 | 6.09  | 1.50  |
| 50005.00 M21 | M-014667- olfactory re | 26707.00 OR2J2  | 13.97 | 6.75  | 1.67  |
| 50005.00 M23 | M-020799- olfactory re | 56656.00 OR2S2  | 5.79  | 1.43  | -0.35 |
| 50005.00 O02 | M-005688- oxytocin re  | 5021.00 OXTR    | 14.32 | 7.10  | 1.75  |
| 50005.00 O04 | M-005687- neuropepti   | 64106.00 NPFFR1 | 9.44  | 2.22  | 0.55  |
| 50005.00 O05 | M-021670- olfactory re | 26696.00 OR2T1  | 5.71  | 1.51  | -0.37 |
| 50005.00 O06 | M-009107- olfactory re | 26493.00 OR8B8  | 6.00  | 1.22  | -0.30 |
| 50005.00 O07 | M-014666- olfactory re | 26692.00 OR2W1  | 6.80  | 0.42  | -0.10 |
| 50005.00 O08 | M-012818- olfactory re | 26658.00 OR7C2  | 12.75 | 5.53  | 1.36  |
| 50005.00 O09 | M-009039- olfactory re | 4994.00 OR3A1   | 7.18  | 0.04  | -0.01 |
| 50005.00 O10 | M-013817- olfactory re | 26659.00 OR7A5  | 8.01  | 0.79  | 0.20  |
| 50005.00 O11 | M-009040- olfactory re | 4995.00 OR3A2   | 6.44  | 0.78  | -0.19 |
| 50005.00 O12 | M-009112- olfactory re | 26333.00 OR7A17 | 14.30 | 7.08  | 1.75  |
| 50005.00 O13 | M-008612- olfactory re | 8392.00 OR3A3   | 4.42  | 2.80  | -0.69 |

|              |                                   |           |           |              |              |       |
|--------------|-----------------------------------|-----------|-----------|--------------|--------------|-------|
| 50005.00 O14 | M-009100- olfactory re            | 8590.00   | OR6A2     | 6.44         | 0.78         | -0.19 |
| 50005.00 O15 | M-023248- olfactory re            | 26689.00  | OR4D1     | 13.57        | 6.35         | 1.57  |
| 50005.00 O16 | M-009795- olfactory re            | 81696.00  | OR5V1     | 7.17         | 0.05         | -0.01 |
| 50005.00 O17 | M-009098- olfactory re            | 79345.00  | OR51B2    | 9.62         | 2.40         | 0.59  |
| 50005.00 O18 | M-008791- olfactory re            | 10798.00  | OR5I1     | 6.51         | 0.71         | -0.18 |
| 50005.00 O19 | M-009072- olfactory re            | 79339.00  | OR51B4    | 9.97         | 2.75         | 0.68  |
| 50005.00 O20 | M-026622- olfactory re            | 338674.00 | OR5F1     | <u>17.82</u> | <b>10.60</b> | 2.62  |
| 50005.00 O21 | M-008774- olfactory re            | 81285.00  | OR51E2    | <u>20.19</u> | <b>12.97</b> | 3.20  |
| 50005.00 O23 | M-009058- olfactory re            | 23538.00  | OR52A1    | 10.95        | 3.73         | 0.92  |
|              |                                   |           | mdn       | 7.22         | 2.74         |       |
|              |                                   |           | 3xMAD     |              | 8.21         |       |
|              |                                   |           | MADc      |              | 4.05         |       |
| 50005.00 C22 |                                   |           |           | 41.18        |              | 51.89 |
| 50005.00 D22 |                                   |           |           | 47.36        |              | 50.38 |
| 50005.00 E22 |                                   |           |           | 47.90        |              | 49.97 |
| 50005.00 F22 |                                   |           |           | 50.47        |              | 42.26 |
|              |                                   |           | mn        | 46.73        |              | 48.62 |
|              |                                   |           | sd        | 3.94         |              | 4.32  |
| 50005.00 G22 |                                   |           |           | 11.85        |              | 5.82  |
| 50005.00 H22 |                                   |           |           | 6.14         |              | 14.43 |
| 50005.00 I22 |                                   |           |           | 8.10         |              | 3.35  |
| 50005.00 J22 |                                   |           |           | 7.45         |              | 3.16  |
|              |                                   |           | mn        | 8.38         |              | 6.69  |
|              |                                   |           | sd        | 2.45         |              | 5.30  |
|              |                                   |           | 3psSD     | 11.81        |              | 12.97 |
|              |                                   |           | 3ngSD     | 7.36         |              | 15.90 |
|              |                                   |           | SumSD     | 19.17        |              | 28.87 |
|              |                                   |           | MeanDf    | 38.35        |              | 41.93 |
|              |                                   |           | SumovrMn  | 0.50         |              | 0.69  |
|              |                                   |           | 1minus    | 0.50         |              | 0.31  |
| 50005.00 G03 | M-003290- polo-like ki            | 5347.00   | PLK1 SMAR | 4.90         |              | 8.04  |
| 50005.00 H03 | M-003290- polo-like ki            | 5347.00   | PLK1 SMAR | 4.49         |              | 31.25 |
| 50005.00 I03 | D-001206- siControl non-targeting |           |           | 8.67         |              | 9.52  |
| 50005.00 J03 | D-001206- siControl non-targeting |           |           | 8.17         |              | 15.46 |
| 50005.00 L03 | D-001600- (siGLO RISC-free siRNA  |           |           | 11.81        |              | 24.22 |



| <u>% inf</u> | <u>abs dev</u> | <u>robust Z</u> | <u>% inf</u> | <u>abs dev</u> | <u>robust Z</u> |
|--------------|----------------|-----------------|--------------|----------------|-----------------|
| 7.81         | 0.39           | -0.08           | 12.64        | 2.17           | 0.40            |
| 12.97        | 4.77           | 1.01            | 6.19         | 4.28           | -0.78           |
| 4.67         | 3.53           | -0.75           | 6.62         | 3.85           | -0.70           |
| 3.43         | 4.77           | -1.02           | 3.46         | 7.01           | -1.27           |
| 9.88         | 1.68           | 0.36            | 7.33         | 3.14           | -0.57           |
| 12.47        | 4.27           | 0.91            | 9.80         | 0.67           | -0.12           |
| 3.05         | 5.15           | -1.10           | 7.78         | 2.69           | -0.49           |
| 5.58         | 2.62           | -0.56           | 8.26         | 2.21           | -0.40           |
| 4.22         | 3.98           | -0.85           | 5.63         | 4.84           | -0.88           |
| 5.25         | 2.95           | -0.63           | 4.54         | 5.93           | -1.08           |
| 6.06         | 2.14           | -0.46           | 11.64        | 1.17           | 0.21            |
| 7.77         | 0.43           | -0.09           | 6.59         | 3.88           | -0.71           |
| 9.55         | 1.35           | 0.29            | 10.13        | 0.34           | -0.06           |
| 3.46         | 4.74           | -1.01           | 5.51         | 4.96           | -0.90           |
| 8.88         | 0.68           | 0.15            | 10.36        | 0.12           | -0.02           |
| 6.09         | 2.11           | -0.45           | 7.44         | 3.03           | -0.55           |
| 17.38        | 9.18           | 1.95            | 6.78         | 3.69           | -0.67           |
| 16.74        | 8.54           | 1.82            | 39.35        | 28.88          | 5.26            |
| 8.66         | 0.46           | 0.10            | 18.12        | 7.65           | 1.39            |
| 5.87         | 2.33           | -0.50           | 20.08        | 9.61           | 1.75            |
| 12.81        | 4.61           | 0.98            | 4.15         | 6.32           | -1.15           |
| 5.19         | 3.01           | -0.64           | 2.11         | 8.36           | -1.52           |
| 12.29        | 4.09           | 0.87            | 9.55         | 0.92           | -0.17           |
| 8.36         | 0.16           | 0.03            | 5.78         | 4.69           | -0.85           |
| 6.42         | 1.78           | -0.38           | 8.22         | 2.25           | -0.41           |
| 8.01         | 0.19           | -0.04           | 4.90         | 5.57           | -1.01           |
| 13.73        | 5.53           | 1.18            | 12.31        | 1.84           | 0.34            |
| 8.74         | 0.54           | 0.12            | 12.80        | 2.33           | 0.43            |
| 10.44        | 2.24           | 0.48            | 10.12        | 0.35           | -0.06           |
| 15.26        | 7.06           | 1.50            | 17.92        | 7.45           | 1.36            |
| 2.58         | 5.62           | -1.20           | 4.00         | 6.47           | -1.18           |
| 4.53         | 3.67           | -0.78           | 13.72        | 3.25           | 0.59            |
| 1.65         | 6.55           | -1.39           | 5.14         | 5.33           | -0.97           |
| 1.94         | 6.26           | -1.33           | 8.41         | 2.06           | -0.37           |
| 4.34         | 3.86           | -0.82           | 9.14         | 1.33           | -0.24           |
| 7.42         | 0.78           | -0.17           | 17.38        | 6.91           | 1.26            |
| 2.00         | 6.20           | -1.32           | 3.72         | 6.75           | -1.23           |
| 7.38         | 0.82           | -0.18           | 11.64        | 1.17           | 0.21            |
| 10.87        | 2.67           | 0.57            | 14.26        | 3.79           | 0.69            |
| 7.75         | 0.45           | -0.10           | 7.77         | 2.70           | -0.49           |
| 10.48        | 2.28           | 0.48            | 9.56         | 0.91           | -0.17           |
| 8.33         | 0.13           | 0.03            | 8.49         | 1.98           | -0.36           |
| 6.44         | 1.76           | -0.37           | 10.74        | 0.27           | 0.05            |
| 5.52         | 2.68           | -0.57           | 2.89         | 7.58           | -1.38           |
| 4.65         | 3.55           | -0.76           | 4.17         | 6.30           | -1.15           |
| 4.71         | 3.49           | -0.74           | 15.37        | 4.90           | 0.89            |

|              |              |             |              |              |               |
|--------------|--------------|-------------|--------------|--------------|---------------|
| 9.16         | 0.96         | 0.21        | 15.93        | 5.46         | 0.99          |
| 15.50        | 7.30         | 1.55        | 22.10        | 11.63        | 2.12          |
| 13.75        | 5.55         | 1.18        | 8.89         | 1.58         | -0.29         |
| 13.63        | 5.43         | 1.16        | 14.30        | 3.83         | 0.70          |
| 3.91         | 4.29         | -0.91       | 4.14         | 6.33         | -1.15         |
| 6.54         | 1.66         | -0.35       | 5.08         | 5.39         | -0.98         |
| 6.37         | 1.83         | -0.39       | 11.16        | 0.69         | 0.13          |
| <u>20.31</u> | <u>12.11</u> | <u>2.58</u> | <u>23.90</u> | <u>13.43</u> | <u>2.45</u> y |
| 16.32        | 8.12         | 1.73        | 15.69        | 5.22         | 0.95          |
| <u>20.76</u> | <u>12.56</u> | <u>2.67</u> | <u>16.66</u> | <u>6.19</u>  | <u>1.13</u> y |
| 18.63        | 10.43        | 2.22        | 7.59         | 2.88         | -0.52         |
| 18.27        | 10.07        | 2.14        | 10.34        | 0.13         | -0.02         |
| 9.14         | 0.94         | 0.20        | 5.74         | 4.73         | -0.86         |
| 6.69         | 1.51         | -0.32       | 8.97         | 1.50         | -0.27         |
| 3.87         | 4.33         | -0.92       | 2.49         | 7.98         | -1.45         |
| 5.09         | 3.11         | -0.66       | 15.86        | 5.39         | 0.98          |
| 7.13         | 1.07         | -0.23       | 12.06        | 1.59         | 0.29          |
| 2.97         | 5.23         | -1.11       | 4.14         | 6.33         | -1.15         |
| 5.61         | 2.59         | -0.55       | 6.66         | 3.81         | -0.69         |
| 5.91         | 2.29         | -0.49       | 24.79        | 14.32        | 2.61          |
| 4.35         | 3.85         | -0.82       | 6.76         | 3.71         | -0.68         |
| 14.69        | 6.49         | 1.38        | 20.69        | 10.22        | 1.86          |
| 3.50         | 4.70         | -1.00       | 9.65         | 0.82         | -0.15         |
| 6.11         | 2.09         | -0.44       | 12.17        | 1.70         | 0.31          |
| 3.72         | 4.48         | -0.95       | 9.21         | 1.26         | -0.23         |
| 1.94         | 6.26         | -1.33       | 11.37        | 0.90         | 0.16          |
| 5.57         | 2.63         | -0.56       | 9.55         | 0.92         | -0.17         |
| 9.49         | 1.29         | 0.27        | 20.76        | 10.29        | 1.87          |
| 10.66        | 2.46         | 0.52        | 18.25        | 7.78         | 1.42          |
| 8.84         | 0.64         | 0.14        | 12.44        | 1.97         | 0.36          |
| 9.13         | 0.93         | 0.20        | 11.79        | 1.32         | 0.24          |
| 9.56         | 1.36         | 0.29        | 11.32        | 0.85         | 0.16          |
| 14.14        | 5.94         | 1.26        | 23.37        | 12.90        | 2.35          |
| 5.52         | 2.68         | -0.57       | 10.58        | 0.11         | 0.02          |
| 10.38        | 2.18         | 0.46        | 7.62         | 2.85         | -0.52         |
| 5.80         | 2.40         | -0.51       | 9.51         | 0.96         | -0.17         |
| 15.17        | 6.97         | 1.48        | 20.78        | 10.31        | 1.88          |
| 16.25        | 8.05         | 1.71        | 14.50        | 4.03         | 0.73          |
| 8.11         | 0.09         | -0.02       | 10.17        | 0.30         | -0.05         |
| 3.74         | 4.46         | -0.95       | 8.63         | 1.84         | -0.33         |
| 4.37         | 3.83         | -0.82       | 8.42         | 2.05         | -0.37         |
| 15.05        | 6.85         | 1.46        | 24.66        | 14.19        | 2.58          |
| 4.54         | 3.66         | -0.78       | 14.25        | 3.78         | 0.69          |
| 2.56         | 5.64         | -1.20       | 15.05        | 4.58         | 0.83          |
| 3.52         | 4.68         | -1.00       | 4.82         | 5.65         | -1.03         |
| 6.17         | 2.03         | -0.43       | 5.05         | 5.42         | -0.99         |
| 3.22         | 4.98         | -1.06       | 3.71         | 6.76         | -1.23         |

|       |      |       |       |      |       |
|-------|------|-------|-------|------|-------|
| 11.38 | 3.18 | 0.68  | 11.73 | 1.26 | 0.23  |
| 3.15  | 5.05 | -1.07 | 14.39 | 3.92 | 0.71  |
| 3.17  | 5.03 | -1.07 | 13.62 | 3.15 | 0.57  |
| 4.37  | 3.83 | -0.82 | 5.12  | 5.35 | -0.97 |
| 4.70  | 3.50 | -0.74 | 8.12  | 2.35 | -0.43 |
| 3.84  | 4.36 | -0.93 | 10.69 | 0.22 | 0.04  |
| 7.01  | 1.19 | -0.25 | 10.14 | 0.33 | -0.06 |
| 11.95 | 3.75 | 0.80  | 17.27 | 6.80 | 1.24  |
| 6.01  | 2.19 | -0.47 | 12.87 | 2.40 | 0.44  |
| 10.52 | 2.32 | 0.49  | 11.53 | 1.06 | 0.19  |
| 7.82  | 0.38 | -0.08 | 9.64  | 0.83 | -0.15 |
| 2.17  | 6.03 | -1.28 | 6.41  | 4.06 | -0.74 |
| 7.09  | 1.11 | -0.24 | 14.82 | 4.35 | 0.79  |
| 4.95  | 3.25 | -0.69 | 6.46  | 4.01 | -0.73 |
| 7.11  | 1.09 | -0.23 | 11.06 | 0.59 | 0.11  |
| 5.67  | 2.53 | -0.54 | 4.49  | 5.98 | -1.09 |
| 4.18  | 4.02 | -0.86 | 9.96  | 0.51 | -0.09 |
| 9.04  | 0.84 | 0.18  | 9.82  | 0.65 | -0.12 |
| 10.78 | 2.58 | 0.55  | 9.14  | 1.33 | -0.24 |
| 16.01 | 7.81 | 1.66  | 7.04  | 3.43 | -0.62 |
| 13.05 | 4.85 | 1.03  | 9.13  | 1.34 | -0.24 |
| 7.88  | 0.32 | -0.07 | 7.70  | 2.77 | -0.50 |
| 18.11 | 9.91 | 2.11  | 15.24 | 4.77 | 0.87  |
| 4.12  | 4.08 | -0.87 | 6.66  | 3.81 | -0.69 |
| 12.20 | 4.00 | 0.85  | 8.10  | 2.37 | -0.43 |
| 11.69 | 3.49 | 0.74  | 6.26  | 4.21 | -0.77 |
| 7.28  | 0.92 | -0.20 | 7.74  | 2.73 | -0.50 |
| 6.15  | 2.05 | -0.44 | 6.57  | 3.90 | -0.71 |
| 12.58 | 4.38 | 0.93  | 7.63  | 2.84 | -0.52 |
| 7.53  | 0.67 | -0.14 | 8.43  | 2.04 | -0.37 |
| 12.95 | 4.75 | 1.01  | 13.96 | 3.49 | 0.64  |
| 15.55 | 7.35 | 1.57  | 11.62 | 1.15 | 0.21  |
| 16.15 | 7.95 | 1.69  | 19.83 | 9.36 | 1.71  |
| 10.34 | 2.14 | 0.46  | 8.85  | 1.62 | -0.29 |
| 7.42  | 0.78 | -0.17 | 12.69 | 2.22 | 0.40  |
| 4.60  | 3.60 | -0.77 | 8.60  | 1.87 | -0.34 |
| 8.36  | 0.16 | 0.03  | 13.28 | 2.81 | 0.51  |
| 2.09  | 6.11 | -1.30 | 7.78  | 2.69 | -0.49 |
| 2.83  | 5.37 | -1.14 | 9.69  | 0.78 | -0.14 |
| 3.14  | 5.06 | -1.08 | 6.93  | 3.54 | -0.64 |
| 6.10  | 2.10 | -0.45 | 15.07 | 4.60 | 0.84  |
| 9.49  | 1.29 | 0.27  | 19.80 | 9.33 | 1.70  |
| 4.92  | 3.28 | -0.70 | 11.39 | 0.92 | 0.17  |
| 3.14  | 5.06 | -1.08 | 2.86  | 7.61 | -1.38 |
| 5.34  | 2.86 | -0.61 | 4.77  | 5.70 | -1.04 |
| 17.20 | 9.00 | 1.92  | 9.84  | 0.63 | -0.11 |
| 4.74  | 3.46 | -0.74 | 7.83  | 2.64 | -0.48 |

|              |              |       |              |              |       |             |
|--------------|--------------|-------|--------------|--------------|-------|-------------|
| 8.30         | 0.10         | 0.02  | 7.21         | 3.26         | -0.59 |             |
| 6.56         | 1.64         | -0.35 | 5.97         | 4.50         | -0.82 |             |
| 7.21         | 0.99         | -0.21 | 8.55         | 1.92         | -0.35 |             |
| 15.55        | 7.35         | 1.57  | 12.88        | 2.41         | 0.44  |             |
| 11.64        | 3.44         | 0.73  | 8.75         | 1.72         | -0.31 |             |
| 8.95         | 0.75         | 0.16  | 5.56         | 4.91         | -0.89 |             |
| 14.86        | 6.66         | 1.42  | 12.67        | 2.20         | 0.40  |             |
| 11.13        | 2.93         | 0.62  | 12.87        | 2.40         | 0.44  |             |
| 6.16         | 2.04         | -0.44 | 5.39         | 5.08         | -0.92 |             |
| 8.26         | 0.06         | 0.01  | 12.59        | 2.12         | 0.39  |             |
| 10.33        | 2.13         | 0.45  | 11.60        | 1.13         | 0.21  |             |
| 13.52        | 5.32         | 1.13  | 16.72        | 6.25         | 1.14  |             |
| 14.73        | 6.53         | 1.39  | 18.13        | 7.66         | 1.39  |             |
| <u>20.92</u> | <b>12.72</b> | 2.71  | <u>20.01</u> | 9.54         | 1.74  | y           |
| 11.06        | 2.86         | 0.61  | 17.45        | 6.98         | 1.27  |             |
| 15.53        | 7.33         | 1.56  | 18.66        | 8.19         | 1.49  |             |
| 9.61         | 1.41         | 0.30  | 9.51         | 0.96         | -0.17 |             |
| 16.52        | 8.32         | 1.77  | 13.88        | 3.41         | 0.62  |             |
| 7.34         | 0.86         | -0.18 | 19.41        | 8.94         | 1.63  |             |
| 11.04        | 2.84         | 0.60  | 11.95        | 1.48         | 0.27  |             |
| 19.92        | <b>11.72</b> | 2.49  | 16.93        | 6.46         | 1.18  |             |
| 9.57         | 1.37         | 0.29  | 14.71        | 4.24         | 0.77  |             |
| 14.82        | 6.62         | 1.41  | 22.15        | <b>11.68</b> | 2.13  |             |
| 14.35        | 6.15         | 1.31  | 19.92        | 9.45         | 1.72  |             |
| 9.42         | 1.22         | 0.26  | 13.00        | 2.53         | 0.46  |             |
| 16.57        | 8.37         | 1.78  | 19.57        | 9.10         | 1.66  |             |
| 10.16        | 1.96         | 0.42  | 14.69        | 4.22         | 0.77  |             |
| 10.86        | 2.66         | 0.57  | 9.83         | 0.64         | -0.11 |             |
| 18.35        | <b>10.15</b> | 2.16  | 40.56        | <b>30.09</b> | 5.48  | x           |
| 11.37        | 3.17         | 0.67  | 18.47        | 8.00         | 1.46  | toxic a,b,c |
| <u>24.99</u> | <b>16.79</b> | 3.57  | <u>28.94</u> | <b>18.47</b> | 3.36  | y           |
| 12.92        | 4.72         | 1.00  | 14.92        | 4.45         | 0.81  |             |
| 8.90         | 0.70         | 0.15  | 8.97         | 1.50         | -0.27 |             |
| 8.14         | 0.06         | -0.01 | 21.43        | 10.96        | 2.00  |             |
| 13.59        | 5.39         | 1.15  | 8.14         | 2.33         | -0.42 |             |
| 7.00         | 1.20         | -0.26 | 6.76         | 3.71         | -0.67 |             |
| 11.37        | 3.17         | 0.68  | 13.25        | 2.78         | 0.51  |             |
| 8.97         | 0.77         | 0.16  | 9.08         | 1.39         | -0.25 |             |
| 8.83         | 0.63         | 0.13  | 5.82         | 4.65         | -0.85 |             |
| 5.85         | 2.35         | -0.50 | 12.83        | 2.36         | 0.43  |             |
| 5.93         | 2.27         | -0.48 | 7.07         | 3.40         | -0.62 |             |
| 12.62        | 4.42         | 0.94  | 18.06        | 7.59         | 1.38  |             |
| 6.77         | 1.43         | -0.30 | 11.97        | 1.50         | 0.27  |             |
| 8.76         | 0.56         | 0.12  | 18.36        | 7.89         | 1.44  |             |
| 6.96         | 1.24         | -0.26 | 15.28        | 4.81         | 0.88  |             |
| 18.12        | <b>9.92</b>  | 2.11  | 19.92        | 9.45         | 1.72  |             |
| 7.02         | 1.18         | -0.25 | 9.95         | 0.52         | -0.09 |             |

|              |              |       |              |              |        |
|--------------|--------------|-------|--------------|--------------|--------|
| 14.27        | 6.07         | 1.29  | 15.59        | 5.12         | 0.93   |
| 15.67        | 7.47         | 1.59  | 22.10        | 11.63        | 2.12   |
| 7.05         | 1.15         | -0.24 | 14.68        | 4.21         | 0.77   |
| 2.79         | 5.41         | -1.15 | 11.29        | 0.82         | 0.15   |
| 7.46         | 0.74         | -0.16 | 17.40        | 6.93         | 1.26   |
| 6.88         | 1.32         | -0.28 | 20.35        | 9.88         | 1.80   |
| <u>25.33</u> | <b>17.13</b> | 3.65  | <u>28.56</u> | <b>18.09</b> | 3.29 y |
| <u>22.20</u> | <b>14.00</b> | 2.98  | <u>29.18</u> | <b>18.71</b> | 3.41 y |
| 10.66        | 2.46         | 0.52  | 13.65        | 3.18         | 0.58   |
| 8.20         | 3.17         |       | 10.47        | 3.71         |        |
|              | 9.52         |       |              | 11.13        |        |
|              | 4.70         |       |              | 5.49         |        |
|              | 47.65        |       |              |              |        |
|              | 54.91        |       |              |              |        |
|              | 58.41        |       |              |              |        |
|              | 58.16        |       |              |              |        |
|              | 54.78        |       |              |              |        |
|              | 5.02         |       |              |              |        |
|              | 5.94         |       |              |              |        |
|              | 9.52         |       |              |              |        |
|              | 15.26        |       |              |              |        |
|              | 9.41         |       |              |              |        |
|              | 10.03        |       |              |              |        |
|              | 3.86         |       |              |              |        |
|              | 15.06        |       |              |              |        |
|              | 11.59        |       |              |              |        |
|              | 26.64        |       |              |              |        |
|              | 44.75        |       |              |              |        |
|              | 0.60         |       |              |              |        |
|              | 0.40         |       |              |              |        |
|              | 22.69        |       |              |              |        |
|              | 24.24        |       |              |              |        |
|              | 11.18        |       |              |              |        |
|              | 9.12         |       |              |              |        |
|              | 14.34        |       |              |              |        |

|                                                                         |           |          |     |
|-------------------------------------------------------------------------|-----------|----------|-----|
| Human3 Pc M-013302- delta-like 1 (Drosophila)                           | 28514.00  | DLL1     | A02 |
| Human3 Pc M-015911- delta-like 1 homolog (Drosophila)                   | 8788.00   | DLK1     | A04 |
| Human3 Pc M-020249- septin 11                                           | 55752.00  | SEPT11   | A05 |
| Human3 Pc M-008984- DIRAS family, GTP-binding RAS-like 1                | 148252.00 | DIRAS1   | A06 |
| Human3 Pc M-011192- angio-associated, migratory cell protein            | 14.00     | AAMP     | A07 |
| Human3 Pc M-004421- death effector domain containing                    | 9191.00   | DEDD     | A08 |
| Human3 Pc M-007302- ATP-binding cassette, sub-family B (MDR/TAP),       | 5244.00   | ABCB4    | A09 |
| Human3 Pc M-011022- damage-specific DNA binding protein 2, 48kDa        | 1643.00   | DDB2     | A10 |
| Human3 Pc M-007309- ATP-binding cassette, sub-family C (CFTR/MRP)       | 89845.00  | ABCC10   | A11 |
| Human3 Pc M-011840- deleted in azoospermia 1                            | 1617.00   | DAZ1     | A12 |
| Human3 Pc M-009909- ATP-binding cassette, sub-family D (ALD), mem       | 5825.00   | ABCD3    | A13 |
| Human3 Pc M-004420- death-associated protein 6                          | 1616.00   | DAXX     | A14 |
| Human3 Pc M-008284- ATP-binding cassette, sub-family G (WHITE), m       | 64240.00  | ABCG5    | A15 |
| Human3 Pc M-004419- death inducer-obliterator 1                         | 11083.00  | DIDO1    | A16 |
| Human3 Pc M-008397- ATP-binding cassette, sub-family G (WHITE), m       | 64241.00  | ABCG8    | A17 |
| Human3 Pc M-015200- dachshund homolog 2 (Drosophila)                    | 117154.00 | DACH2    | A18 |
| Human3 Pc M-013586- ankyrin repeat and BTB (POZ) domain containir       | 80325.00  | ABTB1    | A19 |
| Human3 Pc M-013222- dachshund homolog 1 (Drosophila)                    | 1602.00   | DACH1    | A20 |
| Human3 Pc M-008864- acylphosphatase 2, muscle type                      | 98.00     | ACYP2    | A21 |
| Human3 Pc M-009410- adducin 2 (beta)                                    | 119.00    | ADD2     | A23 |
| Human3 Pc M-019830- lin-7 homolog A (C. elegans)                        | 8825.00   | LIN7A    | B02 |
| Human3 Pc M-031935- LIM domains containing 1                            | 8994.00   | LIMD1    | B04 |
| Human3 Pc M-012618- dynein, axonemal, heavy chain 11                    | 8701.00   | DNAH11   | B05 |
| Human3 Pc M-020010- lipoma HMGIC fusion partner                         | 10186.00  | LHFP     | B06 |
| Human3 Pc M-009296- dynein, axonemal, heavy chain 5                     | 1767.00   | DNAH5    | B07 |
| Human3 Pc M-010607- lectin, galactoside-binding, soluble, 8 (galectin ) | 3964.00   | LGALS8   | B08 |
| Human3 Pc M-010586- dynein, light chain, roadblock-type 1               | 83658.00  | DYNLRB1  | B09 |
| Human3 Pc M-012232- lectin, galactoside-binding, soluble, 4 (galectin ) | 3960.00   | LGALS4   | B10 |
| Human3 Pc M-015304- dynein, light chain, roadblock-type 2               | 83657.00  | DYNLRB2  | B11 |
| Human3 Pc M-020134- lectin, galactoside-binding, soluble, 2             | 3957.00   | LGALS2   | B12 |
| Human3 Pc M-020110- dynein, cytoplasmic 1, light intermediate chain     | 1783.00   | DYNC1LI2 | B13 |
| Human3 Pc M-010683- lectin, galactoside-binding, soluble, 12 (galectin  | 85329.00  | LGALS12  | B14 |
| Human3 Pc M-019818- developmentally regulated GTP binding proteir       | 4733.00   | DRG1     | B15 |
| Human3 Pc M-015396- lymphoid enhancer-binding factor 1                  | 51176.00  | LEF1     | B16 |
| Human3 Pc M-011257- developmentally regulated GTP binding proteir       | 1819.00   | DRG2     | B17 |
| Human3 Pc M-010128- lipopolysaccharide binding protein                  | 3929.00   | LBP      | B18 |
| Human3 Pc M-012219- AT rich interactive domain 3B (BRIGHT-like)         | 10620.00  | ARID3B   | B19 |
| Human3 Pc M-006472- lymphocyte-activation gene 3                        | 3902.00   | LAG3     | B20 |
| Human3 Pc M-011643- atrophin 1                                          | 1822.00   | ATN1     | B21 |
| Human3 Pc M-011995- desmocollin 1                                       | 1823.00   | DSC1     | B23 |
| Human3 Pc M-014010- dishevelled associated activator of morphogen       | 23500.00  | DAAM2    | C02 |
| Human3 Pc M-015834- cold shock domain containing E1, RNA-binding        | 7812.00   | CSDE1    | C04 |
| Human3 Pc M-021376- NCK interacting protein with SH3 domain             | 51517.00  | NCKIPSD  | C05 |
| Human3 Pc M-004263- cysteine-rich, angiogenic inducer, 61               | 3491.00   | CYR61    | C06 |
| Human3 Pc M-011203- aggrecan                                            | 176.00    | ACAN     | C07 |
| Human3 Pc M-011020- cytochrome b-245, alpha polypeptide                 | 1535.00   | CYBA     | C08 |

|                                                                      |                 |             |                   |
|----------------------------------------------------------------------|-----------------|-------------|-------------------|
| Human3 Pc M-011952- allograft inflammatory factor 1                  | 199.00          | AIF1        | C09               |
| Human3 Pc M-012741- CUG triplet repeat, RNA binding protein 2        | 10659.00        | CUGBP2      | C10               |
| Human3 Pc M-011951- absent in melanoma 2                             | 9447.00         | AIM2        | C11               |
| Human3 Pc M-020881- catenin, beta interacting protein 1              | 56998.00        | CTNBP1      | C12               |
| Human3 Pc M-017351- A kinase (PRKA) anchor protein 2                 | 11217.00        | AKAP2       | C13               |
| Human3 Pc M-012633- connective tissue growth factor                  | 1490.00         | CTGF        | C14               |
| Human3 Pc M-020229- PDZ and LIM domain 3                             | 27295.00        | PDLIM3      | C15               |
| Human3 Pc M-011247- cleavage stimulation factor, 3' pre-RNA, subuni  | 1479.00         | CSTF3       | C16               |
| Human3 Pc M-017697- par-3 partitioning defective 3 homolog B (C. ele | 117583.00       | PARD3B      | C17               |
| Human3 Pc M-016071- versican                                         | 1462.00         | VCAN        | C18               |
| Human3 Pc M-012515- ankyrin repeat domain 1 (cardiac muscle)         | 27063.00        | ANKRD1      | C19               |
| Human3 Pc M-008423- corticotropin releasing hormone binding protei   | 1393.00         | CRHBP       | C20               |
| Human3 Pc M-016466- ankyrin repeat domain 5                          | 63926.00        | ANKRD5      | C21               |
| Human3 Pc M-012363- annexin A10                                      | 11199.00        | ANXA10      | C23               |
| Human3 Pc M-011317- AF4/FMR2 family, member 3                        | 3899.00         | AFF3        | D02               |
| Human3 Pc M-011069- L1 cell adhesion molecule                        | 3897.00         | L1CAM       | D04               |
| <b>Human3 Pc M-011996- desmocollin 2</b>                             | <b>1824.00</b>  | <b>DSC2</b> | <b>D05</b>        |
| Human3 Pc M-019756- kaptin (actin binding protein)                   | 11133.00        | KPTN        | D06               |
| Human3 Pc M-003651- desmocollin 3                                    | 1825.00         | DSC3        | D07               |
| Human3 Pc M-007083- Kruppel-like factor 16                           | 83855.00        | KLF16       | D08               |
| Human3 Pc M-011644- desmoglein 1                                     | 1828.00         | DSG1        | D09               |
| Human3 Pc M-006975- Kruppel-like factor 15                           | 28999.00        | KLF15       | D10               |
| Human3 Pc M-011645- desmoglein 2                                     | 1829.00         | DSG2        | D11               |
| Human3 Pc M-007132- Kruppel-like factor 14                           | 136259.00       | KLF14       | D12               |
| Human3 Pc M-011646- desmoglein 3 (pemphigus vulgaris antigen)        | 1830.00         | DSG3        | D13               |
| Human3 Pc M-012901- calcium and integrin binding family member 3     | 117286.00       | CIB3        | D14               |
| Human3 Pc M-011258- dystrobrevin, alpha                              | 1837.00         | DTNA        | D15               |
| Human3 Pc M-012230- calcium and integrin binding family member 2     | 10518.00        | CIB2        | D16               |
| Human3 Pc M-004132- heterogeneous nuclear ribonucleoprotein U-lik    | 11100.00        | HNRPUL1     | D17               |
| Human3 Pc M-012460- KIN, antigenic determinant of recA protein hor   | 22944.00        | KIN         | D18               |
| Human3 Pc M-011855- EGF-containing fibulin-like extracellular matrix | 2202.00         | EFEMP1      | D19               |
| Human3 Pc M-008786- kinesin family member C2                         | 90990.00        | KIFC2       | D20               |
| Human3 Pc M-012094- embryonal Fyn-associated substrate               | 10278.00        | EFS         | D21               |
| Human3 Pc M-006527- early growth response 2 (Krox-20 homolog, Drc    | 1959.00         | EGR2        | D23               |
| Human3 Pc M-008805- cAMP responsive element binding protein-like     | 1388.00         | CREBL1      | E02               |
| Human3 Pc M-004412- CASP2 and RIPK1 domain containing adaptor w      | 8738.00         | CRADD       | E04               |
| Human3 Pc M-011212- annexin A11                                      | 311.00          | ANXA11      | E05               |
| Human3 Pc M-012721- coronin, actin binding protein, 2B               | 10391.00        | CORO2B      | E06               |
| Human3 Pc M-011811- annexin A13                                      | 312.00          | ANXA13      | E07               |
| Human3 Pc M-011420- coronin, actin binding protein, 2A               | 7464.00         | CORO2A      | E08               |
| Human3 Pc M-011213- amyloid beta (A4) precursor protein-binding, fa  | 322.00          | APBB1       | E09               |
| Human3 Pc M-017331- coronin, actin binding protein, 1C               | 23603.00        | CORO1C      | E10               |
| Human3 Pc M-017611- amyloid beta (A4) precursor protein-binding, fa  | 10307.00        | APBB3       | E11               |
| Human3 Pc M-012010- contactin 2 (axonal)                             | 6900.00         | CNTN2       | E12               |
| Human3 Pc M-003869- adenomatosis polyposis coli                      | 324.00          | APC         | E13               |
| Human3 Pc M-011613- contactin 1                                      | 1272.00         | CNTN1       | E14               |
| <b>Human3 Pc M-009847- adenomatosis polyposis coli 2</b>             | <b>10297.00</b> | <b>APC2</b> | <b><u>E15</u></b> |

|                                                                                   |                 |                |            |
|-----------------------------------------------------------------------------------|-----------------|----------------|------------|
| Human3 Pc M-004003- clathrin, light chain (Lcb)                                   | 1212.00         | CLTB           | E16        |
| Human3 Pc M-011571- amyloid P component, serum                                    | 325.00          | APCS           | E17        |
| Human3 Pc M-004002- clathrin, light chain (Lca)                                   | 1211.00         | CLTA           | E18        |
| Human3 Pc M-017633- heat shock 70kDa protein 4-like                               | 22824.00        | HSPA4L         | E19        |
| Human3 Pc M-020504- calyntenin 3                                                  | 9746.00         | CLSTN3         | E20        |
| Human3 Pc M-004178- amyloid beta (A4) precursor-like protein 1                    | 333.00          | APLP1          | E21        |
| Human3 Pc M-017310- apolipoprotein L, 4                                           | 80832.00        | APOL4          | E23        |
| <b>Human3 Pc M-012933- kinesin-associated protein 3</b>                           | <b>22920.00</b> | <b>KIFAP3</b>  | <b>F02</b> |
| Human3 Pc M-015105- TSPY-like 5                                                   | 85453.00        | TSPYL5         | F04        |
| Human3 Pc M-003005- eukaryotic translation initiation factor 4E binding protein 1 | 1978.00         | EIF4EBP1       | F05        |
| Human3 Pc M-014057- leucine rich repeat containing 7                              | 57554.00        | LRRC7          | F06        |
| Human3 Pc M-018671- eukaryotic translation initiation factor 4E binding protein 2 | 1979.00         | EIF4EBP2       | F07        |
| Human3 Pc M-024048- TBC1 domain family, member 9 (with GRAM domain)               | 23158.00        | TBC1D9         | F08        |
| Human3 Pc M-003773- ELAV (embryonic lethal, abnormal vision, Drosophila) 1        | 1994.00         | ELAVL1         | F09        |
| Human3 Pc M-021238- zinc finger CCCH-type containing 11A                          | 9877.00         | ZC3H11A        | F10        |
| Human3 Pc M-019801- ELAV (embryonic lethal, abnormal vision, Drosophila) 2        | 1993.00         | ELAVL2         | F11        |
| Human3 Pc M-021049- KIAA0494                                                      | 9813.00         | KIAA0494       | F12        |
| Human3 Pc M-011264- ELAV (embryonic lethal, abnormal vision, Drosophila) 3        | 1995.00         | ELAVL3         | F13        |
| Human3 Pc M-009490- KH-type splicing regulatory protein (FUSE binding protein)    | 8570.00         | KHSRP          | F14        |
| Human3 Pc M-012851- engulfment and cell motility 1                                | 9844.00         | ELMO1          | F15        |
| Human3 Pc M-020019- KH domain containing, RNA binding, signal transduction        | 10657.00        | KHDRBS1        | F16        |
| Human3 Pc M-008893- ectodermal-neural cortex (with BTB-like domain)               | 8507.00         | ENC1           | F17        |
| Human3 Pc M-009244- jumonji, AT rich interactive domain 2                         | 3720.00         | JARID2         | F18        |
| Human3 Pc M-011026- endoglin (Osler-Rendu-Weber syndrome 1)                       | 2022.00         | ENG            | F19        |
| Human3 Pc M-006957- suppressor of zeste 12 homolog (Drosophila)                   | 23512.00        | SUZ12          | F20        |
| Human3 Pc M-004005- epidermal growth factor receptor pathway substrate 15         | 2060.00         | EPS15          | F21        |
| Human3 Pc M-020729- erythroid associated factor                                   | 51327.00        | ERAF           | F23        |
| Human3 Pc M-013883- calyntenin 2                                                  | 64084.00        | CLSTN2         | G02        |
| Human3 Pc M-005288- caspase homolog (Xenopus laevis)                              | 63967.00        | CLSPN          | G04        |
| Human3 Pc M-010362- androgen-induced proliferation inhibitor                      | 23047.00        | APRIN          | G05        |
| Human3 Pc M-011830- calyntenin 1                                                  | 1047.00         | CLGN           | G06        |
| Human3 Pc M-012820- ADP-ribosylation factor interacting protein 2 (alpha)         | 23647.00        | ARFIP2         | G07        |
| Human3 Pc M-006831- cytoplasmic linker associated protein 1                       | 23332.00        | CLASP1         | G08        |
| Human3 Pc M-009751- Rho guanine nucleotide exchange factor (GEF) 17               | 9828.00         | ARHGEF17       | G09        |
| Human3 Pc M-012801- CDKN1A interacting zinc finger protein 1                      | 25792.00        | CIZ1           | G10        |
| <b>Human3 Pc M-005093- Rho guanine nucleotide exchange factor (GEF) 5</b>         | <b>7984.00</b>  | <b>ARHGEF5</b> | <b>G11</b> |
| Human3 Pc M-020189- cold inducible RNA binding protein                            | 1153.00         | CIRBP          | G12        |
| Human3 Pc M-009882- ras homolog gene family, member U                             | 58480.00        | RHOU           | G13        |
| Human3 Pc M-004410- cell death-inducing DFFA-like effector b                      | 27141.00        | CIDEB          | G14        |
| Human3 Pc M-019289- activating transcription factor 7 interacting protein 1       | 55729.00        | ATF7IP         | G15        |
| Human3 Pc M-004409- cell death-inducing DFFA-like effector a                      | 1149.00         | CIDEA          | G16        |
| Human3 Pc M-021098- apoptosis, caspase activation inhibitor                       | 57099.00        | AVEN           | G17        |
| Human3 Pc M-011240- chromogranin A (parathyroid secretory protein)                | 1113.00         | CHGA           | G18        |
| Human3 Pc M-009787- BTB and CNC homology 1, basic leucine zipper 1                | 60468.00        | BACH2          | G19        |
| Human3 Pc M-019938- chromatin assembly factor 1, subunit A (p150)                 | 10036.00        | CHAF1A         | G20        |
| Human3 Pc M-003870- BCL2-antagonist of cell death                                 | 572.00          | BAD            | G21        |
| Human3 Pc M-011961- BCL2-associated athanogene 2                                  | 9532.00         | BAG2           | G23        |



|                                                                            |                  |                |            |
|----------------------------------------------------------------------------|------------------|----------------|------------|
| Human3 Pc M-016604- influenza virus NS1A binding protein                   | 10625.00         | IVNS1ABP       | H02        |
| Human3 Pc M-021394- integrin beta 1 binding protein (melusin) 2            | 26548.00         | ITGB1BP2       | H04        |
| Human3 Pc M-012709- Era G-protein-like 1 (E. coli)                         | 26284.00         | ERAL1          | H05        |
| Human3 Pc M-004565- integrin, alpha V (vitronectin receptor, alpha pc      | 3685.00          | ITGAV          | H06        |
| Human3 Pc M-020877- Enah/Vasp-like                                         | 51466.00         | EVL            | H07        |
| Human3 Pc M-022258- DENN/MADD domain containing 4A                         | 10260.00         | DENND4A        | H08        |
| Human3 Pc M-005119- Ewing sarcoma breakpoint region 1                      | 2130.00          | EWSR1          | H09        |
| Human3 Pc M-019175- insulinoma-associated 2                                | 84684.00         | INSM2          | H10        |
| Human3 Pc M-007897- coagulation factor V (proaccelerin, labile factor      | 2153.00          | F5             | H11        |
| Human3 Pc M-006535- insulinoma-associated 1                                | 3642.00          | INSM1          | H12        |
| Human3 Pc M-011032- coagulation factor VIII, procoagulant componer         | 2157.00          | F8             | H13        |
| Human3 Pc M-006983- inhibitor of growth family, member 4                   | 51147.00         | ING4           | H14        |
| Human3 Pc M-004025- bromodomain PHD finger transcription factor            | 2186.00          | BPTF           | H15        |
| Human3 Pc M-007000- inhibitor of growth family, member 3                   | 54556.00         | ING3           | H16        |
| <b>Human3 Pc M-011899- Fanconi anemia, complementation group G</b>         | <b>2189.00</b>   | <b>FANCG</b>   | <b>H17</b> |
| Human3 Pc M-006534- inhibitor of growth family, member 2                   | 3622.00          | ING2           | H18        |
| Human3 Pc M-007899- ficolin (collagen/fibrinogen domain containing l       | 2220.00          | FCN2           | H19        |
| Human3 Pc M-006533- inhibitor of growth family, member 1                   | 3621.00          | ING1           | H20        |
| Human3 Pc M-011916- fibroblast growth factor (acidic) intracellular bi     | 9158.00          | FIBP           | H21        |
| Human3 Pc M-015808- armadillo repeat containing 1                          | 55156.00         | ARMC1          | H23        |
| Human3 Pc M-019430- cell growth regulator with EF-hand domain 1            | 10669.00         | CGREF1         | I02        |
| Human3 Pc M-015703- CGG triplet repeat binding protein 1                   | 8545.00          | CGGBP1         | I04        |
| Human3 Pc M-011957- BCL2-associated athanogene 3                           | 9531.00          | BAG3           | I05        |
| Human3 Pc M-012707- cofilin 1 (non-muscle)                                 | 1072.00          | CFL1           | I06        |
| Human3 Pc M-011960- BCL2-associated athanogene 5                           | 9529.00          | BAG5           | I07        |
| Human3 Pc M-011832- centrin, EF-hand protein, 3 (CDC31 homolog, ye         | 1070.00          | CETN3          | I08        |
| Human3 Pc M-011922- membrane associated guanylate kinase, WW a             | 9223.00          | MAGI1          | I09        |
| Human3 Pc M-011831- centrin, EF-hand protein, 1                            | 1068.00          | CETN1          | I10        |
| Human3 Pc M-013664- BAI1-associated protein 3                              | 8938.00          | BAIAP3         | I11        |
| Human3 Pc M-012364- centrosomal protein 250kDa                             | 11190.00         | CEP250         | I12        |
| Human3 Pc M-012708- breast carcinoma amplified sequence 2                  | 10286.00         | BCAS2          | I13        |
| Human3 Pc M-003251- centromere protein C 1                                 | 1060.00          | CENPC1         | I14        |
| Human3 Pc M-006996- B-cell CLL/lymphoma 11A (zinc finger protein)          | 53335.00         | BCL11A         | I15        |
| Human3 Pc M-003250- centromere protein B, 80kDa                            | 1059.00          | CENPB          | I16        |
| Human3 Pc M-003307- B-cell CLL/lymphoma 2                                  | 596.00           | BCL2           | I17        |
| Human3 Pc M-003249- centromere protein A                                   | 1058.00          | CENPA          | I18        |
| Human3 Pc M-018874- B-cell CLL/lymphoma 6, member B (zinc finger           | 255877.00        | BCL6B          | I19        |
| <b>Human3 Pc M-011608- CCAAT/enhancer binding protein (C/EBP), gam</b>     | <b>1054.00</b>   | <b>CEBPG</b>   | <b>I20</b> |
| Human3 Pc M-013141- B-cell CLL/lymphoma 7A                                 | 605.00           | BCL7A          | I21        |
| Human3 Pc M-017228- B-cell CLL/lymphoma 7B                                 | 9275.00          | BCL7B          | I23        |
| Human3 Pc M-017705- insulin-like growth factor 2 mRNA binding prote        | 10644.00         | IGF2BP2        | J02        |
| <b>Human3 Pc M-003977- insulin-like growth factor 2 mRNA binding prote</b> | <b>10642.00</b>  | <b>IGF2BP1</b> | <b>J04</b> |
| Human3 Pc M-016536- pleckstrin homology domain containing, family          | 79990.00         | PLEKHH3        | J05        |
| <b>Human3 Pc M-008675- insulin-like growth factor binding protein 7</b>    | <b>3490.00</b>   | <b>IGFBP7</b>  | <b>J06</b> |
| <b>Human3 Pc M-018212- zinc finger protein 547</b>                         | <b>284306.00</b> | <b>ZNF547</b>  | <b>J07</b> |
| <b>Human3 Pc M-006625- insulin-like growth factor binding protein 6</b>    | <b>3489.00</b>   | <b>IGFBP6</b>  | <b>J08</b> |
| <b>Human3 Pc M-020175- filamin B, beta (actin binding protein 278)</b>     | <b>2317.00</b>   | <b>FLNB</b>    | <b>J09</b> |

|                                                                             |           |                        |                     |
|-----------------------------------------------------------------------------|-----------|------------------------|---------------------|
| Human3 Pc M-010897- insulin-like growth factor binding protein 5            | 3488.00   | IGFBP5                 | J10                 |
| Human3 Pc M-011661- fibromodulin                                            | 2331.00   | FMOD                   | J11                 |
| Human3 Pc M-012583- insulin-like growth factor binding protein 4            | 3487.00   | IGFBP4                 | J12                 |
| Human3 Pc M-019631- fragile X mental retardation 1                          | 2332.00   | FMR1                   | J13                 |
| Human3 Pc M-010896- insulin-like growth factor binding protein 2, 36kDa     | 3485.00   | IGFBP2                 | J14                 |
| Human3 Pc M-010086- FBJ murine osteosarcoma viral oncogene homolog 1        | 2354.00   | FOSB                   | J15                 |
| Human3 Pc M-012559- insulin-like growth factor binding protein 1            | 3484.00   | IGFBP1                 | J16                 |
| Human3 Pc M-020108- fascin homolog 2, actin-bundling protein, retina        | 25794.00  | FSCN2                  | J17                 |
| Human3 Pc M-010929- insulin-like growth factor binding protein, acid labile | 3483.00   | IGFALS                 | J18                 |
| Human3 Pc M-020889- fascin homolog 3, actin-bundling protein, testis        | 29999.00  | FSCN3                  | J19                 |
| Human3 Pc M-004203- interferon-induced protein 35                           | 3430.00   | IFI35                  | J20                 |
| Human3 Pc M-013615- follistatin-like 1                                      | 11167.00  | FSTL1                  | J21                 |
| Human3 Pc M-019634- ferritin, heavy polypeptide 1                           | 2495.00   | FTH1                   | J23                 |
| Human3 Pc M-010346- chromodomain protein, Y-linked, 2A                      | 9426.00   | <a href="#">CDY2A</a>  | <a href="#">K02</a> |
| Human3 Pc M-008916- chromodomain protein, Y-linked, 1                       | 9085.00   | <a href="#">CDY1</a>   | <a href="#">K04</a> |
| Human3 Pc M-009404- BCS1-like (yeast)                                       | 617.00    | BCS1L                  | K05                 |
| Human3 Pc M-019154- CDK5 regulatory subunit associated protein 2            | 55755.00  | CDK5RAP2               | K06                 |
| Human3 Pc M-020228- B double prime 1, subunit of RNA polymerase II          | 55814.00  | BDP1                   | K07                 |
| Human3 Pc M-013169- cadherin 9, type 2 (T1-cadherin)                        | 1007.00   | CDH9                   | K08                 |
| Human3 Pc M-004391- baculoviral IAP repeat-containing 7 (livin)             | 79444.00  | <a href="#">BIRC7</a>  | <a href="#">K09</a> |
| Human3 Pc M-013523- cadherin 8, type 2                                      | 1006.00   | CDH8                   | K10                 |
| Human3 Pc M-004636- BCL2/adenovirus E1B 19kDa interacting protein 1         | 664.00    | BNIP3                  | K11                 |
| Human3 Pc M-011826- cadherin 7, type 2                                      | 1005.00   | CDH7                   | K12                 |
| Human3 Pc M-011900- bromodomain and PHD finger containing, 1                | 7862.00   | BRPF1                  | K13                 |
| Human3 Pc M-011991- cadherin 6, type 2, K-cadherin (fetal kidney)           | 1004.00   | CDH6                   | K14                 |
| Human3 Pc M-015153- BTB (POZ) domain containing 14B                         | 112939.00 | BTBD14B                | K15                 |
| Human3 Pc M-003641- cadherin 5, type 2, VE-cadherin (vascular epithelium)   | 1003.00   | CDH5                   | K16                 |
| Human3 Pc M-013474- calcium binding protein 1                               | 9478.00   | <a href="#">CABP1</a>  | <a href="#">K17</a> |
| Human3 Pc M-003640- cadherin 4, type 1, R-cadherin (retinal)                | 1002.00   | CDH4                   | K18                 |
| Human3 Pc M-016674- calmodulin 2 (phosphorylase kinase, delta)              | 805.00    | CALM2                  | K19                 |
| Human3 Pc M-013051- cadherin-like 23                                        | 64072.00  | CDH23                  | K20                 |
| Human3 Pc M-013401- calmodulin-like 5                                       | 51806.00  | CALML5                 | K21                 |
| Human3 Pc M-003636- calnexin                                                | 821.00    | CANX                   | K23                 |
| Human3 Pc M-013035- intercellular adhesion molecule 5, telencephalic        | 7087.00   | ICAM5                  | L02                 |
| Human3 Pc M-012014- integrin-binding sialoprotein (bone sialoprotein)       | 3381.00   | IBSP                   | L04                 |
| Human3 Pc M-011548- far upstream element (FUSE) binding protein 1           | 8880.00   | FUBP1                  | L05                 |
| Human3 Pc M-003678- hypoxia up-regulated 1                                  | 10525.00  | HYOU1                  | L06                 |
| Human3 Pc M-012914- FUS interacting protein (serine/arginine-rich) 1        | 10772.00  | <a href="#">FUSIP1</a> | <a href="#">L07</a> |
| Human3 Pc M-004357- XIAP associated factor-1                                | 54739.00  | <a href="#">XAF1</a>   | <a href="#">L08</a> |
| Human3 Pc M-012011- fragile X mental retardation, autosomal homolog 1       | 8087.00   | FXR1                   | L09                 |
| Human3 Pc M-021115- angiogenic factor with G patch and FHA domain           | 55109.00  | <a href="#">AGGF1</a>  | <a href="#">L10</a> |
| Human3 Pc M-011955- fragile X mental retardation, autosomal homolog 2       | 9513.00   | FXR2                   | L11                 |
| Human3 Pc M-020432- replication protein A4, 34kDa                           | 29935.00  | RPA4                   | L12                 |
| Human3 Pc M-012455- GRB2-associated binding protein 2                       | 9846.00   | GAB2                   | L13                 |
| Human3 Pc M-004972- heat shock 105kDa/110kDa protein 1                      | 10808.00  | HSPH1                  | L14                 |
| Human3 Pc M-013083- GA binding protein transcription factor, beta subunit   | 2553.00   | GABPB2                 | L15                 |
| Human3 Pc M-010600- heat shock 60kDa protein 1 (chaperonin)                 | 3329.00   | HSPD1                  | L16                 |

|                                                                              |                 |               |            |
|------------------------------------------------------------------------------|-----------------|---------------|------------|
| Human3 Pc M-013057- giant axonal neuropathy (gigaxonin)                      | 8139.00         | GAN           | L17        |
| Human3 Pc M-008952- heat shock 27kDa protein family, member 7 (ca            | 27129.00        | HSPB7         | L18        |
| <b>Human3 Pc M-019844- glial cells missing homolog 2 (Drosophila)</b>        | <b>9247.00</b>  | <b>GCM2</b>   | <b>L19</b> |
| Human3 Pc M-004750- heat shock 70kDa protein 9 (mortalin)                    | 3313.00         | HSPA9         | L20        |
| Human3 Pc M-008717- GTP binding protein overexpressed in skeletal r          | 2669.00         | GEM           | L21        |
| Human3 Pc M-018999- GIPC PDZ domain containing family, member 2              | 54810.00        | GIPC2         | L23        |
| Human3 Pc M-013506- cadherin 20, type 2                                      | 28316.00        | CDH20         | M02        |
| <b>Human3 Pc M-011605- cadherin 2, type 1, N-cadherin (neuronal)</b>         | <b>1000.00</b>  | <b>CDH2</b>   | <b>M04</b> |
| Human3 Pc M-019498- capping protein (actin filament), gelsolin-like          | 822.00          | CAPG          | M05        |
| Human3 Pc M-013105- cadherin 19, type 2                                      | 28513.00        | CDH19         | M06        |
| Human3 Pc M-011823- calyphosine                                              | 828.00          | CAPS          | M07        |
| Human3 Pc M-011992- cadherin 18, type 2                                      | 1016.00         | CDH18         | M08        |
| <b>Human3 Pc M-012212- capping protein (actin filament) muscle Z-line, ε</b> | <b>829.00</b>   | <b>CAPZA1</b> | <b>M09</b> |
| <b>Human3 Pc M-011828- cadherin 16, KSP-cadherin</b>                         | <b>1014.00</b>  | <b>CDH16</b>  | <b>M10</b> |
| Human3 Pc M-004396- NLR family, CARD domain containing 4                     | 58484.00        | NLRC4         | M11        |
| Human3 Pc M-003639- cadherin 15, M-cadherin (myotubule)                      | 1013.00         | CDH15         | M12        |
| Human3 Pc M-003464- nucleotide-binding oligomerization domain con            | 64127.00        | NOD2          | M13        |
| Human3 Pc M-003878- cadherin 13, H-cadherin (heart)                          | 1012.00         | CDH13         | M14        |
| Human3 Pc M-004399- caspase recruitment domain family, member 6              | 84674.00        | CARD6         | M15        |
| Human3 Pc M-011827- cadherin 12, type 2 (N-cadherin 2)                       | 1010.00         | CDH12         | M16        |
| Human3 Pc M-011227- calsequestrin 1 (fast-twitch, skeletal muscle)           | 844.00          | CASQ1         | M17        |
| Human3 Pc M-013493- cadherin 11, type 2, OB-cadherin (osteoblast)            | 1009.00         | CDH11         | M18        |
| Human3 Pc M-011228- calsequestrin 2 (cardiac muscle)                         | 845.00          | CASQ2         | M19        |
| Human3 Pc M-013520- cadherin 10, type 2 (T2-cadherin)                        | 1008.00         | CDH10         | M20        |
| Human3 Pc M-010033- chromobox homolog 3 (HP1 gamma homolog, l                | 11335.00        | CBX3          | M21        |
| Human3 Pc M-004296- chromobox homolog 5 (HP1 alpha homolog, Dr               | 23468.00        | CBX5          | M23        |
| Human3 Pc M-019455- heat shock 70kDa protein 6 (HSP70B')                     | 3310.00         | HSPA6         | N02        |
| Human3 Pc M-008198- heat shock 70kDa protein 5 (glucose-regulated            | 3309.00         | HSPA5         | N04        |
| Human3 Pc M-015484- GLI-Kruppel family member GLI4                           | 2738.00         | GLI4          | N05        |
| Human3 Pc M-012636- heat shock 70kDa protein 4                               | 3308.00         | HSPA4         | N06        |
| <b>Human3 Pc M-014924- GLIS family zinc finger 2</b>                         | <b>84662.00</b> | <b>GLIS2</b>  | <b>N07</b> |
| Human3 Pc M-010599- heat shock 70kDa protein 2                               | 3306.00         | HSPA2         | N08        |
| Human3 Pc M-012671- glycoprotein V (platelet)                                | 2814.00         | GP5           | N09        |
| Human3 Pc M-012110- heat shock 70kDa protein 1-like                          | 3305.00         | HSPA1L        | N10        |
| Human3 Pc M-012540- glycoprotein IX (platelet)                               | 2815.00         | GP9           | N11        |
| Human3 Pc M-003501- heat shock 70kDa protein 1B                              | 3304.00         | HSPA1B        | N12        |
| Human3 Pc M-018892- GRP1 (general receptor for phosphoinositides 1           | 160622.00       | GRASP         | N13        |
| Human3 Pc M-018281- KRR1, small subunit (SSU) processome compon              | 11103.00        | KRR1          | N14        |
| Human3 Pc M-011677- G-rich RNA sequence binding factor 1                     | 2926.00         | GRSF1         | N15        |
| Human3 Pc M-017353- Hermansky-Pudlak syndrome 4                              | 89781.00        | HPS4          | N16        |
| Human3 Pc M-007775- gelsolin (amyloidosis, Finnish type)                     | 2934.00         | GSN           | N17        |
| Human3 Pc M-019860- WD repeat domain 57 (U5 snRNP specific)                  | 9410.00         | WDR57         | N18        |
| Human3 Pc M-013081- PDZ and LIM domain 7 (enigma)                            | 9260.00         | PDLIM7        | N19        |
| Human3 Pc M-017424- hippocalcin-like 1                                       | 3241.00         | HPCAL1        | N20        |
| Human3 Pc M-018239- GTF2I repeat domain containing 2                         | 84163.00        | GTF2IRD2      | N21        |
| Human3 Pc M-012581- general transcription factor IIIC, polypeptide 1,        | 2975.00         | GTF3C1        | N23        |
| Human3 Pc M-003877- cadherin 1, type 1, E-cadherin (epithelial)              | 999.00          | CDH1          | O02        |

|                                                                             |                 |               |            |
|-----------------------------------------------------------------------------|-----------------|---------------|------------|
| Human3 Pc M-003233- cell division cycle 6 homolog ( <i>S. cerevisiae</i> )  | 990.00          | CDC6          | O04        |
| Human3 Pc M-009555- chromobox homolog 6                                     | 23466.00        | CBX6          | O05        |
| Human3 Pc M-011237- CDC5 cell division cycle 5-like ( <i>S. pombe</i> )     | 988.00          | CDC5L         | O06        |
| Human3 Pc M-008355- chromobox homolog 8 (Pc class homolog, <i>Dros</i>      | 57332.00        | CBX8          | O07        |
| Human3 Pc M-017358- CDC42 effector protein (Rho GTPase binding) 3           | 10602.00        | CDC42EP3      | O08        |
| Human3 Pc M-020107- chaperonin containing TCP1, subunit 2 (beta)            | 10576.00        | CCT2          | O09        |
| Human3 Pc M-003231- cell division cycle 37 homolog ( <i>S. cerevisiae</i> ) | 11140.00        | CDC37         | O10        |
| Human3 Pc M-018339- chaperonin containing TCP1, subunit 3 (gamma)           | 7203.00         | CCT3          | O11        |
| <b>Human3 Pc M-017252- CD9 molecule</b>                                     | <b>928.00</b>   | <b>CD9</b>    | <b>O12</b> |
| Human3 Pc M-012797- chaperonin containing TCP1, subunit 5 (epsilon)         | 22948.00        | CCT5          | O13        |
| Human3 Pc M-017257- CD81 molecule                                           | 975.00          | CD81          | O14        |
| Human3 Pc M-016559- chaperonin containing TCP1, subunit 6A (zeta 1          | 908.00          | CCT6A         | O15        |
| Human3 Pc M-004538- CD58 molecule                                           | 965.00          | CD58          | O16        |
| Human3 Pc M-020115- chaperonin containing TCP1, subunit 7 (eta)             | 10574.00        | CCT7          | O17        |
| Human3 Pc M-015970- CD48 molecule                                           | 962.00          | CD48          | O18        |
| Human3 Pc M-003637- CD151 molecule (Raph blood group)                       | 977.00          | CD151         | O19        |
| Human3 Pc M-019505- CD47 molecule                                           | 961.00          | CD47          | O20        |
| Human3 Pc M-019501- CD22 molecule                                           | 933.00          | CD22          | O21        |
| Human3 Pc M-019503- CD34 molecule                                           | 947.00          | CD34          | O23        |
| Human3 Pc M-020884- neurotrimin                                             | 50863.00        | HNT           | P02        |
| Human3 Pc M-004079- heterogeneous nuclear ribonucleoprotein D (Al           | 3184.00         | HNRPD         | P04        |
| Human3 Pc M-017209- H1 histone family, member O                             | 3005.00         | H1FO          | P05        |
| Human3 Pc M-010409- hyaluronan-mediated motility receptor (RHAM             | 3161.00         | HMMR          | P06        |
| Human3 Pc M-006483- H2A histone family, member J                            | 55766.00        | H2AFJ         | P07        |
| Human3 Pc M-012710- high-mobility group nucleosomal binding doma            | 3151.00         | HMGN2         | P08        |
| Human3 Pc M-011683- H2A histone family, member Z                            | 3015.00         | H2AFZ         | P09        |
| Human3 Pc M-013495- high mobility group AT-hook 2                           | 8091.00         | HMGA2         | P10        |
| Human3 Pc M-012051- H3 histone, family 3B (H3.3B)                           | 3021.00         | H3F3B         | P11        |
| Human3 Pc M-018122- high-mobility group protein 2-like 1                    | 10042.00        | HMG2L1        | P12        |
| Human3 Pc M-019910- fibroblast growth factor binding protein 1              | 9982.00         | FGFBP1        | P13        |
| Human3 Pc M-015324- human immunodeficiency virus type I enhance             | 3097.00         | HIVEP2        | P14        |
| Human3 Pc M-007770- hairy and enhancer of split 1, ( <i>Drosophila</i> )    | 3280.00         | HES1          | P15        |
| Human3 Pc M-011448- histone cluster 2, H2be                                 | 8349.00         | HIST2H2BE     | P16        |
| Human3 Pc M-016117- hairy and enhancer of split 4 ( <i>Drosophila</i> )     | 57801.00        | HES4          | P17        |
| Human3 Pc M-006630- histone cluster 1, H1c                                  | 3006.00         | HIST1H1C      | P18        |
| Human3 Pc M-009020- hairy and enhancer of split 7 ( <i>Drosophila</i> )     | 84667.00        | HES7          | P19        |
| Human3 Pc M-016867- drebrin-like                                            | 28988.00        | DBNL          | P20        |
| <b>Human3 Pc M-020242- HIG1 domain family, member 1A</b>                    | <b>25994.00</b> | <b>HIGD1A</b> | <b>P21</b> |
| Human3 Pc M-016867- drebrin-like                                            | 28988.00        | DBNL          | P23        |
|                                                                             |                 | mdn           |            |
|                                                                             |                 | 3xMAD         |            |
|                                                                             |                 | MADc          |            |
| Human3 Pools: Remaining Druggable Genome                                    |                 | IFNAR         | C22        |
| Human3 Pools: Remaining Druggable Genome                                    |                 |               | D22        |
| Human3 Pools: Remaining Druggable Genome                                    |                 |               | E22        |
| Human3 Pools: Remaining Druggable Genome                                    |                 |               | F22        |
|                                                                             |                 |               | <b>m</b>   |

|                                                       |           |
|-------------------------------------------------------|-----------|
| Human3 Pools: Remaining Druggable Genome              | sd        |
| Human3 Pools: Remaining Druggable Genome              | G22       |
| Human3 Pools: Remaining Druggable Genome              | H22       |
| Human3 Pools: Remaining Druggable Genome              | I22       |
| Human3 Pools: Remaining Druggable Genome              | J22       |
|                                                       | m         |
|                                                       | sd        |
| Human3 Pc D-001206-: siControl non-targeting siRNA #2 | I03       |
| Human3 Pc D-001206-: siControl non-targeting siRNA #2 | J03       |
|                                                       | m         |
|                                                       | sd        |
|                                                       | 3psSD     |
|                                                       | 3ngSD     |
|                                                       | SM SD     |
|                                                       | Mn Diff   |
|                                                       | SMovrMn   |
|                                                       | 1-SMovrMi |

**Z6**

|                                                       |                       |
|-------------------------------------------------------|-----------------------|
| <b>Human3 Pc D-001600-( siGLO RISC-free siRNA</b>     | <b>K03</b>            |
| Human3 Pc M-003290- polo-like kinase 1 (Drosophila)   | 5347.00 PLK1 SMAF H03 |
| Human3 Pc M-003290- polo-like kinase 1 (Drosophila)   | 5347.00 PLK1 SMAF G03 |
| Human3 Pc D-001206-: siControl non-targeting siRNA #2 | I03                   |
| Human3 Pc D-001206-: siControl non-targeting siRNA #2 | J03                   |
| <b>Human3 Pc D-001600-( siGLO RISC-free siRNA</b>     | <b>L03</b>            |

| <b>% inf</b> | <b>abs dev</b> | <b>robust Z</b> | <b>% inf</b> | <b>abs dev</b> | <b>robust Z</b> | <b>% inf</b> | <b>abs dev</b> | <b>robust Z</b> |
|--------------|----------------|-----------------|--------------|----------------|-----------------|--------------|----------------|-----------------|
| 7.34         | 0.78           | 0.16            | 8.48         | 5.26           | 2.18            | 2.41         | 2.37           | -0.71           |
| 7.24         | 0.68           | 0.14            | 3.19         | 0.03           | -0.01           | 5.55         | 0.77           | 0.23            |
| 2.81         | 3.75           | -0.79           | 2.17         | 1.05           | -0.44           | 1.08         | 3.70           | -1.11           |
| 2.89         | 3.67           | -0.78           | 4.64         | 1.42           | 0.59            | 3.32         | 1.46           | -0.44           |
| 4.58         | 1.98           | -0.42           | 4.02         | 0.80           | 0.33            | 4.07         | 0.71           | -0.21           |
| 7.24         | 0.68           | 0.14            | 7.79         | 4.57           | 1.89            | 3.70         | 1.08           | -0.32           |
| 5.16         | 1.40           | -0.30           | 8.43         | 5.21           | 2.16            | 4.52         | 0.26           | -0.08           |
| 1.79         | 4.77           | -1.01           | 2.67         | 0.55           | -0.23           | 2.69         | 2.09           | -0.63           |
| 3.35         | 3.21           | -0.68           | 3.51         | 0.29           | 0.12            | 7.71         | 2.93           | 0.88            |
| 3.74         | 2.82           | -0.60           | 6.05         | 2.83           | 1.17            | 2.44         | 2.34           | -0.70           |
| 1.83         | 4.73           | -1.00           | 5.04         | 1.82           | 0.75            | 2.06         | 2.72           | -0.81           |
| 4.15         | 2.41           | -0.51           | 5.25         | 2.03           | 0.84            | 3.25         | 1.53           | -0.46           |
| 8.07         | 1.51           | 0.32            | 8.28         | 5.06           | 2.09            | 8.26         | 3.48           | 1.04            |
| 11.53        | 4.97           | 1.05            | 11.52        | 8.30           | 3.44            | 6.88         | 2.10           | 0.63            |
| 1.42         | 5.14           | -1.09           | 1.32         | 1.90           | -0.79           | 0.79         | 3.99           | -1.20           |
| 9.12         | 2.56           | 0.54            | 8.94         | 5.72           | 2.37            | 5.39         | 0.61           | 0.18            |
| 7.91         | 1.35           | 0.28            | 4.04         | 0.82           | 0.34            | 3.18         | 1.60           | -0.48           |
| 4.50         | 2.06           | -0.44           | 4.78         | 1.56           | 0.65            | 2.69         | 2.09           | -0.63           |
| 12.11        | 5.55           | 1.17            | 9.98         | 6.76           | 2.80            | 4.54         | 0.24           | -0.07           |
| 7.72         | 1.16           | 0.24            | 4.00         | 0.78           | 0.32            | 1.48         | 3.30           | -0.99           |
| 1.18         | 5.38           | -1.14           | 1.34         | 1.88           | -0.78           | 5.22         | 0.44           | 0.13            |
| 7.33         | 0.77           | 0.16            | 9.21         | 5.99           | 2.48            | 9.74         | 4.96           | 1.49            |
| 1.15         | 5.41           | -1.14           | 1.02         | 2.20           | -0.91           | 6.46         | 1.68           | 0.50            |
| 1.51         | 5.05           | -1.07           | 1.45         | 1.77           | -0.73           | 6.01         | 1.23           | 0.37            |
| 9.47         | 2.91           | 0.61            | 2.04         | 1.18           | -0.49           | 2.94         | 1.84           | -0.55           |
| 7.95         | 1.39           | 0.29            | 5.01         | 1.79           | 0.74            | 8.34         | 3.56           | 1.07            |
| 4.77         | 1.79           | -0.38           | 2.76         | 0.46           | -0.19           | 4.64         | 0.14           | -0.04           |
| 3.08         | 3.48           | -0.74           | 2.44         | 0.78           | -0.32           | 6.31         | 1.53           | 0.46            |
| 3.05         | 3.51           | -0.74           | 2.11         | 1.11           | -0.46           | 5.94         | 1.16           | 0.35            |
| 7.75         | 1.19           | 0.25            | 4.16         | 0.94           | 0.39            | 7.88         | 3.10           | 0.93            |
| 4.68         | 1.88           | -0.40           | 1.11         | 2.12           | -0.88           | 3.13         | 1.65           | -0.49           |
| 1.27         | 5.29           | -1.12           | 0.55         | 2.67           | -1.10           | 5.74         | 0.96           | 0.29            |
| 6.58         | 0.02           | 0.00            | 3.76         | 0.54           | 0.22            | 3.88         | 0.90           | -0.27           |
| 6.84         | 0.28           | 0.06            | 5.12         | 1.90           | 0.79            | 4.27         | 0.51           | -0.15           |
| 3.34         | 3.22           | -0.68           | 0.60         | 2.62           | -1.08           | 0.91         | 3.87           | -1.16           |
| 2.56         | 4.00           | -0.84           | 1.09         | 2.13           | -0.88           | 0.81         | 3.97           | -1.19           |
| 2.40         | 4.16           | -0.88           | 0.17         | 3.05           | -1.26           | 2.63         | 2.15           | -0.65           |
| 6.44         | 0.12           | -0.03           | 1.56         | 1.66           | -0.69           | 5.53         | 0.75           | 0.22            |
| 3.03         | 3.53           | -0.75           | 1.26         | 1.96           | -0.81           | 0.11         | 4.67           | -1.40           |
| 3.49         | 3.07           | -0.65           | 0.97         | 2.25           | -0.93           | 1.29         | 3.49           | -1.05           |
| 10.87        | 4.31           | 0.91            | 3.89         | 0.67           | 0.28            | 15.72        | 10.94          | 3.28            |
| 7.81         | 1.25           | 0.26            | 3.94         | 0.72           | 0.30            | 4.77         | 0.01           | 0.00            |
| 8.88         | 2.32           | 0.49            | 6.74         | 3.52           | 1.46            | 14.62        | 9.84           | 2.95            |
| 1.16         | 5.40           | -1.14           | 0.85         | 2.37           | -0.98           | 3.27         | 1.51           | -0.45           |
| 13.42        | 6.86           | 1.45            | 3.11         | 0.11           | -0.04           | 6.70         | 1.92           | 0.58            |
| 2.61         | 3.95           | -0.84           | 1.22         | 2.00           | -0.83           | 3.56         | 1.22           | -0.36           |

|              |       |       |              |       |       |              |       |       |
|--------------|-------|-------|--------------|-------|-------|--------------|-------|-------|
| 14.19        | 7.63  | 1.61  | 10.51        | 7.29  | 3.02  | 8.63         | 3.85  | 1.16  |
| 2.92         | 3.64  | -0.77 | 2.30         | 0.92  | -0.38 | 4.48         | 0.30  | -0.09 |
| 5.56         | 1.00  | -0.21 | 3.38         | 0.16  | 0.06  | 7.97         | 3.19  | 0.96  |
| 3.43         | 3.13  | -0.66 | 3.67         | 0.45  | 0.19  | 3.05         | 1.73  | -0.52 |
| 5.70         | 0.86  | -0.18 | 2.70         | 0.52  | -0.22 | 3.00         | 1.78  | -0.53 |
| 11.70        | 5.14  | 1.09  | 5.75         | 2.53  | 1.05  | 10.61        | 5.83  | 1.75  |
| 3.64         | 2.92  | -0.62 | 1.73         | 1.49  | -0.62 | 10.27        | 5.49  | 1.65  |
| 8.79         | 2.23  | 0.47  | 3.96         | 0.74  | 0.30  | 6.61         | 1.83  | 0.55  |
| 2.61         | 3.95  | -0.84 | 0.56         | 2.66  | -1.10 | 2.66         | 2.12  | -0.63 |
| 7.07         | 0.51  | 0.11  | 5.34         | 2.12  | 0.88  | 5.78         | 1.00  | 0.30  |
| 3.89         | 2.67  | -0.56 | 4.25         | 1.03  | 0.43  | 4.98         | 0.20  | 0.06  |
| 2.45         | 4.11  | -0.87 | 0.60         | 2.62  | -1.08 | 2.30         | 2.48  | -0.74 |
| 0.83         | 5.73  | -1.21 | 0.78         | 2.44  | -1.01 | 1.49         | 3.29  | -0.99 |
| 3.86         | 2.70  | -0.57 | 0.69         | 2.53  | -1.05 | 1.35         | 3.43  | -1.03 |
| 2.17         | 4.39  | -0.93 | 2.50         | 0.72  | -0.30 | 1.72         | 3.06  | -0.92 |
| 1.21         | 5.35  | -1.13 | 2.22         | 1.00  | -0.42 | 5.09         | 0.31  | 0.09  |
| <u>12.98</u> | 6.42  | 1.35  | <u>18.12</u> | 14.90 | 6.17  | <u>14.19</u> | 9.41  | 2.82  |
| 2.12         | 4.44  | -0.94 | 1.21         | 2.01  | -0.83 | 4.51         | 0.27  | -0.08 |
| 5.42         | 1.14  | -0.24 | 4.80         | 1.58  | 0.65  | 2.81         | 1.97  | -0.59 |
| 1.15         | 5.41  | -1.14 | 1.92         | 1.30  | -0.54 | 1.75         | 3.03  | -0.91 |
| 7.33         | 0.77  | 0.16  | 7.68         | 4.46  | 1.84  | 7.94         | 3.16  | 0.95  |
| 14.14        | 7.58  | 1.60  | 9.86         | 6.64  | 2.75  | 6.69         | 1.91  | 0.57  |
| 1.71         | 4.85  | -1.02 | 2.92         | 0.30  | -0.13 | 3.74         | 1.04  | -0.31 |
| 3.98         | 2.58  | -0.55 | 2.23         | 0.99  | -0.41 | 2.87         | 1.91  | -0.57 |
| 8.66         | 2.10  | 0.44  | 2.65         | 0.57  | -0.24 | 5.74         | 0.96  | 0.29  |
| 11.13        | 4.57  | 0.96  | 3.18         | 0.04  | -0.02 | 4.60         | 0.18  | -0.05 |
| 2.01         | 4.55  | -0.96 | 2.51         | 0.71  | -0.29 | 1.83         | 2.95  | -0.88 |
| 3.96         | 2.60  | -0.55 | 6.81         | 3.59  | 1.48  | 2.74         | 2.04  | -0.61 |
| 2.53         | 4.03  | -0.85 | 2.67         | 0.55  | -0.23 | 2.48         | 2.30  | -0.69 |
| 4.76         | 1.80  | -0.38 | 5.55         | 2.33  | 0.97  | 4.61         | 0.17  | -0.05 |
| 4.25         | 2.31  | -0.49 | 5.57         | 2.35  | 0.97  | 3.60         | 1.18  | -0.35 |
| 5.03         | 1.53  | -0.32 | 1.37         | 1.85  | -0.77 | 2.91         | 1.87  | -0.56 |
| 2.30         | 4.26  | -0.90 | 2.59         | 0.63  | -0.26 | 0.99         | 3.79  | -1.14 |
| 15.79        | 9.23  | 1.95  | 9.35         | 6.13  | 2.54  | 4.75         | 0.03  | -0.01 |
| 13.93        | 7.37  | 1.56  | 2.90         | 0.32  | -0.13 | 5.18         | 0.40  | 0.12  |
| 2.91         | 3.65  | -0.77 | 0.73         | 2.49  | -1.03 | 2.14         | 2.64  | -0.79 |
| 12.20        | 5.64  | 1.19  | 4.03         | 0.81  | 0.33  | 3.98         | 0.80  | -0.24 |
| 16.99        | 10.43 | 2.20  | 4.78         | 1.56  | 0.64  | 5.08         | 0.30  | 0.09  |
| 24.93        | 18.37 | 3.88  | 5.84         | 2.62  | 1.08  | 10.08        | 5.30  | 1.59  |
| 9.09         | 2.53  | 0.53  | 1.27         | 1.95  | -0.81 | 4.37         | 0.41  | -0.12 |
| 10.68        | 4.12  | 0.87  | 4.03         | 0.81  | 0.34  | 5.38         | 0.60  | 0.18  |
| 7.78         | 1.22  | 0.26  | 0.66         | 2.56  | -1.06 | 5.17         | 0.39  | 0.12  |
| 5.99         | 0.57  | -0.12 | 2.14         | 1.08  | -0.45 | 0.88         | 3.90  | -1.17 |
| 4.44         | 2.12  | -0.45 | 3.09         | 0.13  | -0.06 | 5.08         | 0.30  | 0.09  |
| 6.47         | 0.09  | -0.02 | 0.88         | 2.34  | -0.97 | 8.83         | 4.05  | 1.22  |
| 17.36        | 10.80 | 2.28  | 2.24         | 0.98  | -0.41 | 3.63         | 1.15  | -0.34 |
| <u>36.09</u> | 29.53 | 6.23  | <u>24.62</u> | 21.40 | 8.86  | <u>18.62</u> | 13.84 | 4.15  |



|       |       |       |       |      |       |       |      |       |
|-------|-------|-------|-------|------|-------|-------|------|-------|
| 6.46  | 0.10  | -0.02 | 3.84  | 0.62 | 0.25  | 3.46  | 1.32 | -0.40 |
| 5.71  | 0.86  | -0.18 | 2.19  | 1.03 | -0.43 | 4.52  | 0.26 | -0.08 |
| 6.98  | 0.42  | 0.09  | 2.30  | 0.93 | -0.38 | 2.36  | 2.42 | -0.72 |
| 21.31 | 14.75 | 3.11  | 3.17  | 0.05 | -0.02 | 5.80  | 1.02 | 0.31  |
| 3.23  | 3.33  | -0.70 | 0.23  | 2.99 | -1.24 | 3.34  | 1.44 | -0.43 |
| 14.92 | 8.36  | 1.76  | 6.18  | 2.96 | 1.22  | 6.29  | 1.51 | 0.45  |
| 14.07 | 7.51  | 1.58  | 1.82  | 1.40 | -0.58 | 2.16  | 2.62 | -0.78 |
| 13.98 | 7.42  | 1.57  | 11.32 | 8.10 | 3.35  | 12.12 | 7.34 | 2.20  |
| 2.94  | 3.62  | -0.76 | 3.21  | 0.01 | -0.01 | 7.87  | 3.09 | 0.93  |
| 10.28 | 3.72  | 0.78  | 3.62  | 0.40 | 0.17  | 6.42  | 1.64 | 0.49  |
| 8.82  | 2.26  | 0.48  | 5.50  | 2.28 | 0.94  | 2.55  | 2.23 | -0.67 |
| 11.82 | 5.26  | 1.11  | 5.56  | 2.34 | 0.97  | 4.18  | 0.60 | -0.18 |
| 0.86  | 5.70  | -1.21 | 3.23  | 0.01 | 0.00  | 0.96  | 3.82 | -1.15 |
| 16.77 | 10.21 | 2.16  | 8.07  | 4.85 | 2.01  | 5.52  | 0.74 | 0.22  |
| 5.22  | 1.34  | -0.28 | 1.76  | 1.46 | -0.60 | 1.45  | 3.33 | -1.00 |
| 11.62 | 5.06  | 1.07  | 3.34  | 0.12 | 0.05  | 1.22  | 3.56 | -1.07 |
| 6.74  | 0.18  | 0.04  | 2.43  | 0.79 | -0.33 | 1.39  | 3.39 | -1.02 |
| 6.41  | 0.15  | -0.03 | 1.82  | 1.40 | -0.58 | 1.74  | 3.04 | -0.91 |
| 6.43  | 0.13  | -0.03 | 0.37  | 2.85 | -1.18 | 0.86  | 3.92 | -1.18 |
| 8.63  | 2.07  | 0.44  | 2.04  | 1.18 | -0.49 | 2.38  | 2.40 | -0.72 |
| 6.17  | 0.39  | -0.08 | 2.17  | 1.05 | -0.44 | 1.95  | 2.83 | -0.85 |
| 2.47  | 4.09  | -0.87 | 0.36  | 2.86 | -1.18 | 0.14  | 4.64 | -1.39 |
| 14.79 | 8.23  | 1.74  | 1.84  | 1.38 | -0.57 | 2.06  | 2.72 | -0.82 |
| 24.35 | 17.79 | 3.76  | 4.57  | 1.35 | 0.56  | 8.96  | 4.18 | 1.25  |
| 4.70  | 1.86  | -0.39 | 2.57  | 0.65 | -0.27 | 1.19  | 3.59 | -1.08 |
| 2.52  | 4.04  | -0.85 | 0.70  | 2.52 | -1.04 | 0.59  | 4.19 | -1.26 |
| 3.86  | 2.70  | -0.57 | 1.28  | 1.94 | -0.80 | 2.57  | 2.21 | -0.66 |
| 6.10  | 0.46  | -0.10 | 3.07  | 0.15 | -0.06 | 4.50  | 0.28 | -0.08 |
| 3.42  | 3.14  | -0.66 | 1.89  | 1.33 | -0.55 | 4.49  | 0.29 | -0.09 |
| 3.61  | 2.95  | -0.62 | 3.81  | 0.59 | 0.25  | 8.43  | 3.65 | 1.10  |
| 0.84  | 5.72  | -1.21 | 0.26  | 2.96 | -1.23 | 1.91  | 2.87 | -0.86 |
| 6.55  | 0.01  | 0.00  | 3.36  | 0.14 | 0.06  | 10.27 | 5.49 | 1.65  |
| 9.82  | 3.26  | 0.69  | 4.33  | 1.11 | 0.46  | 9.40  | 4.62 | 1.39  |
| 8.91  | 2.35  | 0.50  | 2.78  | 0.44 | -0.18 | 8.94  | 4.16 | 1.25  |
| 6.00  | 0.56  | -0.12 | 1.41  | 1.81 | -0.75 | 2.32  | 2.46 | -0.74 |
| 23.19 | 16.63 | 3.51  | 11.37 | 8.15 | 3.38  | 8.93  | 4.15 | 1.24  |
| 8.06  | 1.50  | 0.32  | 2.36  | 0.86 | -0.36 | 4.88  | 0.10 | 0.03  |
| 7.17  | 0.61  | 0.13  | 7.57  | 4.35 | 1.80  | 4.34  | 0.44 | -0.13 |
| 3.48  | 3.08  | -0.65 | 1.61  | 1.61 | -0.67 | 4.32  | 0.46 | -0.14 |
| 3.78  | 2.78  | -0.59 | 4.84  | 1.62 | 0.67  | 2.08  | 2.70 | -0.81 |
| 2.22  | 4.34  | -0.92 | 1.79  | 1.43 | -0.59 | 2.19  | 2.59 | -0.78 |
| 5.46  | 1.10  | -0.23 | 3.40  | 0.18 | 0.07  | 3.60  | 1.18 | -0.35 |
| 13.80 | 7.24  | 1.53  | 4.29  | 1.07 | 0.44  | 3.83  | 0.95 | -0.28 |
| 4.55  | 2.01  | -0.43 | 3.37  | 0.15 | 0.06  | 1.93  | 2.85 | -0.85 |
| 3.66  | 2.90  | -0.61 | 1.81  | 1.41 | -0.58 | 3.74  | 1.04 | -0.31 |
| 11.80 | 5.24  | 1.10  | 7.71  | 4.49 | 1.86  | 6.81  | 2.03 | 0.61  |
| 6.92  | 0.36  | 0.07  | 4.61  | 1.39 | 0.57  | 2.35  | 2.43 | -0.73 |



|              |              |             |              |              |             |              |              |             |
|--------------|--------------|-------------|--------------|--------------|-------------|--------------|--------------|-------------|
| 3.23         | 3.33         | -0.70       | 1.14         | 2.08         | -0.86       | 2.72         | 2.06         | -0.62       |
| 3.76         | 2.80         | -0.59       | 2.01         | 1.21         | -0.50       | 1.93         | 2.85         | -0.85       |
| 5.30         | 1.26         | -0.27       | 3.22         | 0.00         | 0.00        | 1.99         | 2.79         | -0.83       |
| 21.43        | 14.87        | 3.14        | 6.19         | 2.97         | 1.23        | 13.92        | 9.14         | 2.74        |
| 12.66        | 6.10         | 1.29        | 3.02         | 0.20         | -0.08       | 3.90         | 0.88         | -0.26       |
| 6.32         | 0.24         | -0.05       | 2.51         | 0.71         | -0.30       | 2.05         | 2.73         | -0.82       |
| 3.53         | 3.03         | -0.64       | 4.11         | 0.89         | 0.37        | 2.06         | 2.72         | -0.81       |
| 8.97         | 2.41         | 0.51        | 3.13         | 0.09         | -0.04       | 3.71         | 1.07         | -0.32       |
| 13.42        | 6.86         | 1.45        | 3.22         | 0.00         | 0.00        | 2.72         | 2.06         | -0.62       |
| 15.60        | 9.04         | 1.91        | 7.81         | 4.59         | 1.90        | 8.73         | 3.95         | 1.19        |
| 6.25         | 0.31         | -0.07       | 0.90         | 2.32         | -0.96       | 1.58         | 3.20         | -0.96       |
| 16.92        | 10.36        | 2.19        | 8.61         | 5.39         | 2.23        | 7.01         | 2.23         | 0.67        |
| 8.17         | 1.61         | 0.34        | 2.85         | 0.37         | -0.15       | 3.37         | 1.41         | -0.42       |
| 2.67         | 3.89         | -0.82       | 3.37         | 0.15         | 0.06        | 1.52         | 3.26         | -0.98       |
| <u>27.21</u> | <u>20.65</u> | <u>4.36</u> | <u>10.28</u> | <u>7.06</u>  | <u>2.92</u> | <u>10.96</u> | <u>6.18</u>  | <u>1.85</u> |
| 3.10         | 3.46         | -0.73       | 1.92         | 1.30         | -0.54       | 1.76         | 3.02         | -0.91       |
| 16.37        | 9.81         | 2.07        | 4.20         | 0.98         | 0.41        | 9.51         | 4.73         | 1.42        |
| 17.56        | 11.00        | 2.32        | 5.50         | 2.28         | 0.94        | 9.66         | 4.88         | 1.46        |
| 18.00        | 11.44        | 2.41        | 5.14         | 1.92         | 0.79        | 5.35         | 0.57         | 0.17        |
| 11.37        | 4.81         | 1.01        | 10.99        | 7.77         | 3.22        | 6.13         | 1.35         | 0.40        |
| 2.83         | 3.73         | -0.79       | 1.43         | 1.79         | -0.74       | 2.44         | 2.34         | -0.70       |
| 5.04         | 1.52         | -0.32       | 1.75         | 1.47         | -0.61       | 6.11         | 1.33         | 0.40        |
| 7.81         | 1.25         | 0.26        | 2.75         | 0.47         | -0.19       | 4.67         | 0.11         | -0.03       |
| 1.80         | 4.76         | -1.01       | 2.52         | 0.70         | -0.29       | 1.46         | 3.32         | -1.00       |
| 15.94        | 9.38         | 1.98        | 7.07         | 3.85         | 1.59        | 7.45         | 2.67         | 0.80        |
| 1.24         | 5.32         | -1.13       | 0.74         | 2.48         | -1.03       | 1.78         | 3.00         | -0.90       |
| 4.24         | 2.32         | -0.49       | 2.14         | 1.08         | -0.45       | 2.20         | 2.58         | -0.77       |
| 19.30        | 12.74        | 2.69        | 4.51         | 1.29         | 0.53        | 4.26         | 0.52         | -0.16       |
| 5.21         | 1.35         | -0.29       | 2.21         | 1.01         | -0.42       | 1.61         | 3.17         | -0.95       |
| 2.82         | 3.74         | -0.79       | 2.40         | 0.82         | -0.34       | 3.50         | 1.28         | -0.38       |
| 4.66         | 1.90         | -0.40       | 2.15         | 1.07         | -0.45       | 4.02         | 0.76         | -0.23       |
| 25.84        | 19.28        | 4.07        | 5.49         | 2.27         | 0.94        | 8.56         | 3.78         | 1.13        |
| 13.07        | 6.51         | 1.37        | 1.46         | 1.76         | -0.73       | 5.65         | 0.87         | 0.26        |
| 3.65         | 2.91         | -0.62       | 0.46         | 2.76         | -1.14       | 1.59         | 3.19         | -0.96       |
| 5.74         | 0.82         | -0.18       | 1.26         | 1.96         | -0.81       | 2.47         | 2.31         | -0.69       |
| 17.86        | 11.30        | 2.38        | 3.29         | 0.07         | 0.03        | 6.92         | 2.14         | 0.64        |
| 5.91         | 0.65         | -0.14       | 1.13         | 2.09         | -0.87       | 2.18         | 2.60         | -0.78       |
| <u>24.40</u> | <u>17.84</u> | <u>3.77</u> | <u>7.96</u>  | <u>4.74</u>  | <u>1.96</u> | <u>12.05</u> | <u>7.27</u>  | <u>2.18</u> |
| 10.73        | 4.17         | 0.88        | 0.40         | 2.82         | -1.17       | 4.10         | 0.68         | -0.20       |
| 2.13         | 4.43         | -0.94       | 0.78         | 2.44         | -1.01       | 1.22         | 3.56         | -1.07       |
| 2.67         | 3.89         | -0.82       | 4.09         | 0.87         | 0.36        | 3.40         | 1.38         | -0.41       |
| <u>22.37</u> | <u>15.81</u> | <u>3.34</u> | <u>18.26</u> | <u>15.04</u> | <u>6.23</u> | <u>23.72</u> | <u>18.94</u> | <u>5.68</u> |
| 4.04         | 2.52         | -0.53       | 2.07         | 1.15         | -0.48       | 2.81         | 1.97         | -0.59       |
| <u>21.74</u> | <u>15.18</u> | <u>3.20</u> | <u>5.85</u>  | <u>2.63</u>  | <u>1.09</u> | <u>12.47</u> | <u>7.69</u>  | <u>2.31</u> |
| <u>23.50</u> | <u>16.94</u> | <u>3.58</u> | <u>10.56</u> | <u>7.34</u>  | <u>3.04</u> | <u>10.58</u> | <u>5.80</u>  | <u>1.74</u> |
| <u>23.34</u> | <u>16.78</u> | <u>3.54</u> | <u>13.98</u> | <u>10.76</u> | <u>4.46</u> | <u>15.10</u> | <u>10.32</u> | <u>3.09</u> |
| <u>15.78</u> | <u>9.22</u>  | <u>1.95</u> | <u>11.12</u> | <u>7.90</u>  | <u>3.27</u> | <u>15.97</u> | <u>11.19</u> | <u>3.36</u> |

|              |       |       |              |       |       |              |       |       |
|--------------|-------|-------|--------------|-------|-------|--------------|-------|-------|
| 9.78         | 3.22  | 0.68  | 3.44         | 0.22  | 0.09  | 8.39         | 3.61  | 1.08  |
| 9.57         | 3.01  | 0.63  | 7.46         | 4.24  | 1.76  | 6.36         | 1.58  | 0.47  |
| 6.59         | 0.03  | 0.00  | 1.08         | 2.14  | -0.89 | 5.56         | 0.78  | 0.23  |
| 4.69         | 1.87  | -0.40 | 0.95         | 2.27  | -0.94 | 8.20         | 3.42  | 1.03  |
| 8.98         | 2.42  | 0.51  | 4.35         | 1.13  | 0.47  | 17.36        | 12.58 | 3.77  |
| 4.39         | 2.17  | -0.46 | 0.90         | 2.32  | -0.96 | 1.79         | 2.99  | -0.90 |
| 4.58         | 1.99  | -0.42 | 3.95         | 0.73  | 0.30  | 6.43         | 1.65  | 0.50  |
| 2.16         | 4.40  | -0.93 | 1.34         | 1.88  | -0.78 | 1.69         | 3.09  | -0.93 |
| 7.59         | 1.03  | 0.22  | 2.14         | 1.08  | -0.45 | 7.75         | 2.97  | 0.89  |
| 2.21         | 4.35  | -0.92 | 1.26         | 1.96  | -0.81 | 2.19         | 2.59  | -0.78 |
| 6.18         | 0.38  | -0.08 | 2.92         | 0.30  | -0.13 | 6.18         | 1.40  | 0.42  |
| 4.25         | 2.31  | -0.49 | 2.18         | 1.04  | -0.43 | 2.48         | 2.30  | -0.69 |
| 2.47         | 4.09  | -0.86 | 0.64         | 2.58  | -1.07 | 1.30         | 3.48  | -1.04 |
| <u>15.97</u> | 9.41  | 1.99  | <u>16.06</u> | 12.84 | 5.32  | <u>22.10</u> | 17.32 | 5.20  |
| <u>18.18</u> | 11.62 | 2.45  | <u>14.43</u> | 11.21 | 4.64  | <u>12.10</u> | 7.32  | 2.19  |
| 14.40        | 7.84  | 1.66  | 8.04         | 4.82  | 2.00  | 9.21         | 4.43  | 1.33  |
| 4.45         | 2.11  | -0.45 | 4.86         | 1.64  | 0.68  | 4.48         | 0.30  | -0.09 |
| 5.25         | 1.31  | -0.28 | 2.63         | 0.59  | -0.25 | 3.12         | 1.66  | -0.50 |
| 4.68         | 1.88  | -0.40 | 5.06         | 1.84  | 0.76  | 5.21         | 0.43  | 0.13  |
| <u>17.49</u> | 10.93 | 2.31  | <u>11.44</u> | 8.22  | 3.40  | <u>18.27</u> | 13.49 | 4.04  |
| 12.90        | 6.34  | 1.34  | 5.42         | 2.20  | 0.91  | 5.43         | 0.65  | 0.20  |
| 5.66         | 0.90  | -0.19 | 12.75        | 9.53  | 3.95  | 6.37         | 1.59  | 0.48  |
| 7.80         | 1.24  | 0.26  | 5.75         | 2.53  | 1.05  | 5.42         | 0.64  | 0.19  |
| 4.51         | 2.05  | -0.43 | 2.01         | 1.21  | -0.50 | 2.54         | 2.24  | -0.67 |
| 7.21         | 0.65  | 0.14  | 3.96         | 0.74  | 0.31  | 4.45         | 0.33  | -0.10 |
| 15.38        | 8.82  | 1.86  | 8.56         | 5.34  | 2.21  | 8.49         | 3.71  | 1.11  |
| 5.90         | 0.66  | -0.14 | 2.16         | 1.06  | -0.44 | 3.03         | 1.75  | -0.52 |
| <u>34.33</u> | 27.77 | 5.86  | <u>18.17</u> | 14.95 | 6.19  | <u>22.89</u> | 18.11 | 5.43  |
| 3.02         | 3.54  | -0.75 | 1.20         | 2.02  | -0.84 | 2.96         | 1.82  | -0.55 |
| 1.27         | 5.29  | -1.12 | 0.73         | 2.49  | -1.03 | 1.75         | 3.03  | -0.91 |
| 6.18         | 0.38  | -0.08 | 3.86         | 0.64  | 0.27  | 3.96         | 0.82  | -0.24 |
| 3.76         | 2.80  | -0.59 | 0.30         | 2.92  | -1.21 | 1.68         | 3.10  | -0.93 |
| 7.38         | 0.82  | 0.17  | 1.94         | 1.28  | -0.53 | 3.16         | 1.62  | -0.49 |
| 3.49         | 3.07  | -0.65 | 2.95         | 0.27  | -0.11 | 7.25         | 2.47  | 0.74  |
| 1.76         | 4.80  | -1.02 | 3.36         | 0.14  | 0.06  | 3.20         | 1.58  | -0.47 |
| 2.07         | 4.49  | -0.95 | 2.10         | 1.12  | -0.46 | 3.49         | 1.29  | -0.39 |
| 4.07         | 2.49  | -0.53 | 2.43         | 0.79  | -0.33 | 5.62         | 0.84  | 0.25  |
| <u>17.16</u> | 10.60 | 2.24  | <u>9.60</u>  | 6.38  | 2.64  | <u>11.42</u> | 6.64  | 1.99  |
| <u>13.70</u> | 7.14  | 1.51  | <u>9.38</u>  | 6.16  | 2.55  | <u>15.71</u> | 10.93 | 3.28  |
| 16.93        | 10.37 | 2.19  | 5.27         | 2.05  | 0.85  | 7.17         | 2.39  | 0.72  |
| <u>12.05</u> | 5.49  | 1.16  | <u>8.44</u>  | 5.22  | 2.16  | <u>18.85</u> | 14.07 | 4.22  |
| 9.34         | 2.78  | 0.59  | 5.64         | 2.42  | 1.00  | 8.85         | 4.07  | 1.22  |
| 7.63         | 1.07  | 0.23  | 6.18         | 2.96  | 1.23  | 9.73         | 4.95  | 1.48  |
| 10.06        | 3.50  | 0.74  | 4.61         | 1.39  | 0.58  | 9.07         | 4.29  | 1.29  |
| 7.93         | 1.37  | 0.29  | 6.87         | 3.65  | 1.51  | 10.19        | 5.41  | 1.62  |
| 7.70         | 1.14  | 0.24  | 4.66         | 1.44  | 0.59  | 6.98         | 2.20  | 0.66  |
| 7.10         | 0.54  | 0.11  | 2.77         | 0.45  | -0.19 | 4.84         | 0.06  | 0.02  |

|              |              |             |              |              |             |              |              |             |
|--------------|--------------|-------------|--------------|--------------|-------------|--------------|--------------|-------------|
| 9.30         | 2.74         | 0.58        | 6.29         | 3.07         | 1.27        | 8.17         | 3.39         | 1.02        |
| 1.79         | 4.77         | -1.01       | 1.22         | 2.00         | -0.83       | 3.26         | 1.52         | -0.46       |
| <u>18.93</u> | <u>12.37</u> | <u>2.61</u> | <u>16.68</u> | <u>13.46</u> | <u>5.57</u> | <u>22.28</u> | <u>17.50</u> | <u>5.25</u> |
| 1.96         | 4.60         | -0.97       | 2.13         | 1.09         | -0.45       | 4.01         | 0.77         | -0.23       |
| 1.33         | 5.23         | -1.10       | 1.18         | 2.04         | -0.85       | 2.99         | 1.79         | -0.54       |
| 3.89         | 2.67         | -0.56       | 3.21         | 0.01         | -0.01       | 5.82         | 1.04         | 0.31        |
| 17.08        | <u>10.52</u> | <u>2.22</u> | 3.92         | 0.70         | 0.29        | 11.34        | 6.56         | 1.97        |
| <u>21.33</u> | <u>14.77</u> | <u>3.12</u> | <u>9.92</u>  | <u>6.70</u>  | <u>2.77</u> | <u>8.30</u>  | <u>3.52</u>  | <u>1.06</u> |
| 11.16        | 4.60         | 0.97        | 4.32         | 1.10         | 0.45        | 5.48         | 0.70         | 0.21        |
| 16.48        | <u>9.92</u>  | <u>2.09</u> | 6.60         | 3.38         | 1.40        | 9.92         | 5.14         | 1.54        |
| 10.45        | 3.89         | 0.82        | 6.73         | 3.51         | 1.45        | 9.09         | 4.31         | 1.29        |
| 12.09        | 5.53         | 1.17        | 2.92         | 0.30         | -0.12       | 15.41        | <u>10.63</u> | <u>3.19</u> |
| <u>17.97</u> | <u>11.41</u> | <u>2.41</u> | <u>6.32</u>  | <u>3.10</u>  | <u>1.28</u> | <u>15.28</u> | <u>10.50</u> | <u>3.15</u> |
| <u>17.40</u> | <u>10.84</u> | <u>2.29</u> | <u>5.84</u>  | <u>2.62</u>  | <u>1.08</u> | <u>12.66</u> | <u>7.88</u>  | <u>2.36</u> |
| 5.52         | 1.04         | -0.22       | 1.87         | 1.35         | -0.56       | 5.90         | 1.12         | 0.34        |
| 6.16         | 0.40         | -0.09       | 2.05         | 1.17         | -0.48       | 5.34         | 0.56         | 0.17        |
| 4.48         | 2.08         | -0.44       | 0.55         | 2.67         | -1.11       | 2.49         | 2.29         | -0.69       |
| 15.19        | 8.63         | 1.82        | 4.85         | 1.63         | 0.67        | 8.97         | 4.19         | 1.26        |
| 7.82         | 1.26         | 0.27        | 1.66         | 1.56         | -0.65       | 4.05         | 0.73         | -0.22       |
| 5.55         | 1.01         | -0.21       | 2.40         | 0.82         | -0.34       | 3.27         | 1.51         | -0.45       |
| 7.67         | 1.11         | 0.23        | 1.67         | 1.55         | -0.64       | 8.10         | 3.32         | 1.00        |
| 17.79        | <u>11.23</u> | <u>2.37</u> | 3.70         | 0.48         | 0.20        | 8.44         | 3.66         | 1.10        |
| 4.59         | 1.97         | -0.42       | 1.34         | 1.88         | -0.78       | 5.98         | 1.20         | 0.36        |
| 9.71         | 3.15         | 0.66        | 0.90         | 2.32         | -0.96       | 7.58         | 2.80         | 0.84        |
| 6.92         | 0.36         | 0.07        | 1.62         | 1.60         | -0.66       | 6.09         | 1.31         | 0.39        |
| 4.02         | 2.54         | -0.54       | 0.86         | 2.36         | -0.98       | 10.01        | 5.23         | 1.57        |
| 9.04         | 2.48         | 0.52        | 2.65         | 0.57         | -0.24       | 2.85         | 1.93         | -0.58       |
| 3.18         | 3.38         | -0.72       | 6.29         | 3.07         | 1.27        | 4.79         | 0.01         | 0.00        |
| 1.88         | 4.68         | -0.99       | 2.77         | 0.45         | -0.19       | 3.79         | 0.99         | -0.30       |
| 7.42         | 0.86         | 0.18        | 5.12         | 1.90         | 0.79        | 2.06         | 2.72         | -0.81       |
| <u>17.96</u> | <u>11.40</u> | <u>2.41</u> | <u>14.33</u> | <u>11.11</u> | <u>4.60</u> | <u>13.08</u> | <u>8.30</u>  | <u>2.49</u> |
| 7.51         | 0.95         | 0.20        | 6.63         | 3.41         | 1.41        | 8.17         | 3.39         | 1.02        |
| 4.47         | 2.09         | -0.44       | 4.56         | 1.34         | 0.55        | 3.68         | 1.10         | -0.33       |
| 9.32         | 2.76         | 0.58        | 5.08         | 1.86         | 0.77        | 6.91         | 2.13         | 0.64        |
| 15.27        | 8.71         | 1.84        | 6.20         | 2.98         | 1.23        | 6.63         | 1.85         | 0.56        |
| 13.11        | 6.55         | 1.38        | 4.34         | 1.12         | 0.46        | 5.25         | 0.47         | 0.14        |
| 6.45         | 0.11         | -0.02       | 2.85         | 0.37         | -0.16       | 2.97         | 1.81         | -0.54       |
| 4.66         | 1.90         | -0.40       | 1.52         | 1.70         | -0.70       | 4.10         | 0.68         | -0.20       |
| 4.06         | 2.50         | -0.53       | 0.72         | 2.50         | -1.04       | 3.22         | 1.56         | -0.47       |
| 3.13         | 3.43         | -0.73       | 0.63         | 2.59         | -1.07       | 4.61         | 0.17         | -0.05       |
| 12.48        | 5.92         | 1.25        | 2.59         | 0.63         | -0.26       | 10.19        | 5.41         | 1.62        |
| 9.84         | 3.28         | 0.69        | 1.77         | 1.45         | -0.60       | 6.83         | 2.05         | 0.61        |
| 4.03         | 2.53         | -0.54       | 1.57         | 1.65         | -0.68       | 0.99         | 3.79         | -1.14       |
| 6.90         | 0.34         | 0.07        | 2.48         | 0.74         | -0.31       | 4.40         | 0.38         | -0.11       |
| 11.95        | 5.39         | 1.14        | 1.78         | 1.44         | -0.60       | 2.75         | 2.03         | -0.61       |
| 21.52        | <u>14.96</u> | <u>3.16</u> | 1.59         | 1.63         | -0.67       | 5.34         | 0.56         | 0.17        |
| 6.49         | 0.07         | -0.02       | 4.98         | 1.76         | 0.73        | 7.83         | 3.05         | 0.92        |

|              |              |              |              |              |             |              |              |             |
|--------------|--------------|--------------|--------------|--------------|-------------|--------------|--------------|-------------|
| 4.48         | 2.08         | -0.44        | 2.38         | 0.84         | -0.35       | 5.80         | 1.02         | 0.31        |
| 12.02        | 5.46         | 1.15         | 8.12         | 4.90         | 2.03        | 11.25        | 6.47         | 1.94        |
| 13.63        | 7.07         | 1.49         | 4.70         | 1.48         | 0.61        | 9.41         | 4.63         | 1.39        |
| 7.94         | 1.38         | 0.29         | 2.19         | 1.03         | -0.43       | 8.31         | 3.53         | 1.06        |
| 8.33         | 1.77         | 0.37         | 3.32         | 0.10         | 0.04        | 6.89         | 2.11         | 0.63        |
| 8.48         | 1.92         | 0.40         | 3.61         | 0.39         | 0.16        | 5.07         | 0.29         | 0.09        |
| 9.92         | 3.36         | 0.71         | 6.00         | 2.78         | 1.15        | 3.49         | 1.29         | -0.39       |
| 9.21         | 2.65         | 0.56         | 3.33         | 0.11         | 0.04        | 2.90         | 1.88         | -0.56       |
| <u>49.29</u> | <u>42.73</u> | <u>9.02</u>  | <u>20.01</u> | <u>16.79</u> | <u>6.95</u> | <u>20.65</u> | <u>15.87</u> | <u>4.76</u> |
| 8.01         | 1.45         | 0.31         | 1.30         | 1.92         | -0.79       | 6.29         | 1.51         | 0.45        |
| 2.26         | 4.30         | -0.91        | 0.21         | 3.01         | -1.25       | 4.66         | 0.12         | -0.04       |
| 11.41        | 4.85         | 1.02         | 1.59         | 1.63         | -0.68       | 7.33         | 2.55         | 0.77        |
| 9.64         | 3.08         | 0.65         | 4.38         | 1.16         | 0.48        | 6.53         | 1.75         | 0.53        |
| 4.50         | 2.06         | -0.44        | 0.75         | 2.47         | -1.02       | 2.05         | 2.73         | -0.82       |
| 17.26        | 10.70        | 2.26         | 2.63         | 0.59         | -0.25       | 10.33        | 5.55         | 1.66        |
| 20.76        | 14.20        | 3.00         | 2.35         | 0.87         | -0.36       | 9.19         | 4.41         | 1.32        |
| 20.48        | 13.92        | 2.94         | 2.17         | 1.05         | -0.44       | 7.99         | 3.21         | 0.96        |
| 7.33         | 0.77         | 0.16         | 1.15         | 2.07         | -0.86       | 6.28         | 1.50         | 0.45        |
| 1.98         | 4.58         | -0.97        | 0.32         | 2.90         | -1.20       | 4.73         | 0.05         | -0.01       |
| 3.96         | 2.60         | -0.55        | 2.86         | 0.36         | -0.15       | 5.33         | 0.55         | 0.17        |
| 5.48         | 1.08         | -0.23        | 5.95         | 2.73         | 1.13        | 10.97        | 6.19         | 1.86        |
| 3.37         | 3.19         | -0.67        | 4.44         | 1.22         | 0.50        | 4.04         | 0.75         | -0.22       |
| 1.68         | 4.88         | -1.03        | 3.25         | 0.03         | 0.01        | 5.63         | 0.85         | 0.25        |
| 5.03         | 1.53         | -0.32        | 3.18         | 0.04         | -0.02       | 8.50         | 3.72         | 1.11        |
| 7.73         | 1.17         | 0.25         | 7.83         | 4.61         | 1.91        | 8.49         | 3.71         | 1.11        |
| 8.93         | 2.37         | 0.50         | 6.61         | 3.39         | 1.40        | 7.05         | 2.27         | 0.68        |
| 9.56         | 3.00         | 0.63         | 7.96         | 4.74         | 1.96        | 7.96         | 3.18         | 0.95        |
| 3.68         | 2.88         | -0.61        | 3.52         | 0.30         | 0.12        | 6.24         | 1.46         | 0.44        |
| 3.86         | 2.70         | -0.57        | 4.79         | 1.57         | 0.65        | 4.48         | 0.30         | -0.09       |
| 3.12         | 3.44         | -0.73        | 4.63         | 1.41         | 0.58        | 10.98        | 6.20         | 1.86        |
| 4.94         | 1.62         | -0.34        | 4.76         | 1.54         | 0.63        | 12.28        | 7.50         | 2.25        |
| 13.53        | 6.97         | 1.47         | 4.17         | 0.95         | 0.39        | 10.20        | 5.42         | 1.63        |
| 3.93         | 2.63         | -0.56        | 6.40         | 3.18         | 1.32        | 8.17         | 3.39         | 1.02        |
| 3.82         | 2.74         | -0.58        | 9.68         | 6.46         | 2.68        | 5.39         | 0.61         | 0.18        |
| 2.00         | 4.56         | -0.96        | 3.69         | 0.47         | 0.19        | 4.42         | 0.36         | -0.11       |
| 8.49         | 1.93         | 0.41         | 11.30        | 8.08         | 3.34        | 16.62        | 11.84        | 3.55        |
| 4.59         | 1.97         | -0.42        | 6.95         | 3.73         | 1.54        | 3.25         | 1.53         | -0.46       |
| <u>19.59</u> | <u>13.03</u> | <u>2.75</u>  | <u>13.92</u> | <u>10.70</u> | <u>4.43</u> | <u>23.00</u> | <u>18.22</u> | <u>5.46</u> |
| 10.58        | 4.02         | 0.85         | 3.58         | 0.36         | 0.15        | 4.69         | 0.09         | -0.03       |
| 6.56         | 3.20         |              | 3.22         | 1.63         |             | 4.78         | 2.25         |             |
|              | 9.60         |              |              | 4.89         |             |              | 6.76         |             |
|              | 4.74         |              |              | 2.41         |             |              | 3.33         |             |
| 38.94        |              | 27.14        |              | 53.57        |             |              |              |             |
| 55.40        |              | 51.06        |              | 43.98        |             |              |              |             |
| 58.95        |              | 31.40        |              | 43.07        |             |              |              |             |
| 67.16        |              | 30.81        |              | 27.84        |             |              |              |             |
| <b>55.11</b> |              | <b>35.10</b> |              | <b>42.12</b> |             |              |              |             |

|       |       |       |      |
|-------|-------|-------|------|
| 11.85 | 10.81 | 10.63 |      |
| 22.07 | 14.13 | 16.03 |      |
| 29.61 | 17.90 | 15.94 |      |
| 38.18 | 6.20  | 14.42 |      |
| 35.63 | 9.83  | 17.75 |      |
| 31.37 | 12.02 | 16.04 |      |
| 7.17  | 5.09  | 1.36  |      |
| 8.16  | 1.00  | 2.69  |      |
| 10.62 | 6.71  | 2.87  |      |
| 9.39  | 3.85  | 2.78  |      |
| 1.74  | 4.04  | 0.13  | 0.00 |
| 35.56 | 32.42 | 31.90 |      |
| 5.22  | 12.11 | 0.38  |      |
| 40.78 | 44.53 | 32.28 |      |
| 45.72 | 31.25 | 39.34 |      |
| 0.89  | 1.42  | 0.82  |      |
| 0.11  | -0.42 | 0.18  |      |

|              |              |              |  |
|--------------|--------------|--------------|--|
| <b>34.79</b> | <b>28.02</b> | <b>28.79</b> |  |
| 13.93        | 6.67         | 18.90        |  |
| 2.06         | 3.07         | 6.04         |  |
| 8.16         | 1.00         | 2.69         |  |
| 10.62        | 6.71         | 2.87         |  |
| <b>30.63</b> | <b>35.30</b> | <b>36.73</b> |  |



y

y

y

x      debris b

y



x toxic a,b,c

x debris b,c

y

y

y

y

y

y

y

y  
y

y

y

y  
y

y

y

y

y

y

y

y

x      b artifact

y

|                     |                                                 |                 |                | <u>% inf</u>        | <u>abs dev</u>      |
|---------------------|-------------------------------------------------|-----------------|----------------|---------------------|---------------------|
| 50007.00 A02        | M-018338- metallothionein 2A                    | 4502.00         | MT2A           | 1.10                | 3.64                |
| 50007.00 A04        | M-012724- metallothionein 1A                    | 4489.00         | MT1A           | 2.71                | 2.03                |
| 50007.00 A05        | M-012122- lectin, mannose-binding, 1            | 3998.00         | LMAN1          | 1.52                | 3.22                |
| 50007.00 A06        | M-009842- Ras-associated protein Rap1           | 51277.00        | RBJ            | 1.09                | 3.65                |
| 50007.00 A07        | M-012416- leiomodulin 1 (smooth muscle          | 25802.00        | LMOD1          | 2.10                | 2.64                |
| 50007.00 A08        | M-018981- high-mobility group box 1             | 3146.00         | HMGB1          | 3.64                | 1.10                |
| 50007.00 A09        | M-018773- leucine-rich PPR-motif conta          | 10128.00        | LRPPRC         | 5.26                | 0.52                |
| 50007.00 A10        | M-007666- polycystic kidney disease 1 (         | 5310.00         | PKD1           | 3.90                | 0.84                |
| 50007.00 A11        | M-011078- latent transforming growth f          | 4053.00         | LTBP2          | 1.26                | 3.49                |
| 50007.00 A12        | M-017166- RAD51 associated protein 1            | 10635.00        | RAD51AP1       | 7.27                | 2.53                |
| 50007.00 A13        | M-010522- neighbor of BRCA1 gene 1              | 4077.00         | NBR1           | 0.49                | 4.25                |
| 50007.00 A14        | M-018972- PIN2-interacting protein 1            | 54984.00        | PINX1          | 4.33                | 0.41                |
| 50007.00 A15        | M-012796- metal response element bin            | 22823.00        | MTF2           | 1.56                | 3.18                |
| 50007.00 A16        | M-004004- phosphatidylinositol binding          | 8301.00         | PICALM         | 10.78               | 6.04                |
| 50007.00 A17        | M-013618- microtubule-actin crosslinkin         | 23499.00        | MACF1          | 0.77                | 3.97                |
| 50007.00 A18        | M-014862- PHD finger protein 6                  | 84295.00        | PHF6           | 0.46                | 4.28                |
| 50007.00 A19        | M-017491- mucosal vascular addressin c          | 8174.00         | MADCAM1        | 3.13                | 1.61                |
| 50007.00 A20        | M-012912- PHD finger protein 2                  | 5253.00         | PHF2           | 4.57                | 0.17                |
| 50007.00 A21        | M-003561- SMAD family member 2                  | 4087.00         | SMAD2          | 8.76                | 4.02                |
| 50007.00 A23        | M-009018- v-maf musculoaponeurotic f            | 9935.00         | MAFB           | 1.50                | 3.24                |
| 50007.00 B02        | M-019749- C-type lectin domain family           | 7123.00         | CLEC3B         | 10.85               | 6.11                |
| 50007.00 B04        | M-013948- TCDD-inducible poly(ADP-rik           | 25976.00        | TIPARP         | 2.14                | 2.60                |
| 50007.00 B05        | M-006546- pleiomorphic adenoma gene             | 5325.00         | PLAGL1         | 3.75                | 0.99                |
| 50007.00 B06        | M-019488- timeless homolog (Drosophi            | 8914.00         | TIMELESS       | 2.86                | 1.88                |
| <b>50007.00 B07</b> | <b>M-018037- pleckstrin homology domain</b>     | <b>59338.00</b> | <b>PLEKHA1</b> | <b><u>20.33</u></b> | <b><u>15.59</u></b> |
| 50007.00 B08        | M-013042- TIA1 cytotoxic granule-assoc          | 7072.00         | TIA1           | 6.25                | 1.51                |
| 50007.00 B09        | M-009585- phospholipid transfer protei          | 5360.00         | PLTP           | 1.07                | 3.67                |
| 50007.00 B10        | M-011189- transferrin                           | 7018.00         | TF             | 8.62                | 3.88                |
| 50007.00 B11        | M-009344- PMS1 postmeiotic segregati            | 5378.00         | PMS1           | 8.09                | 3.35                |
| 50007.00 B12        | M-021219- telomeric repeat binding fac          | 54386.00        | TERF2IP        | 0.76                | 3.98                |
| 50007.00 B13        | M-010032- PMS2 postmeiotic segregati            | 5395.00         | PMS2           | 0.65                | 4.09                |
| 50007.00 B14        | M-003546- telomeric repeat binding fac          | 7014.00         | TERF2          | 3.81                | 0.93                |
| 50007.00 B15        | M-019926- proline-rich nuclear recepto          | 10957.00        | PNRC1          | 10.89               | 6.15                |
| 50007.00 B16        | M-010542- telomeric repeat binding fac          | 7013.00         | TERF1          | 7.72                | 2.98                |
| 50007.00 B17        | M-004205- POT1 protection of telomere           | 25913.00        | POT1           | 3.68                | 1.06                |
| 50007.00 B18        | M-012749- t-complex 1                           | 6950.00         | TCP1           | 5.81                | 1.07                |
| 50007.00 B19        | M-011358- protein phosphatase 1, regu           | 5514.00         | PPP1R10        | 5.82                | 1.08                |
| <b>50007.00 B20</b> | <b>M-009590- transcription factor-like 5 (b</b> | <b>10732.00</b> | <b>TCFL5</b>   | <b><u>14.83</u></b> | <b><u>10.09</u></b> |
| 50007.00 B21        | M-004065- protein phosphatase 1, regu           | 26051.00        | PPP1R16B       | 0.50                | 4.24                |
| 50007.00 B23        | M-025402- protein phosphatase 1, regu           | 55607.00        | PPP1R9A        | 1.20                | 3.54                |
| 50007.00 C02        | M-021410- polyhomeotic homolog 2 (D             | 1912.00         | PHC2           | 7.26                | 2.52                |
| 50007.00 C04        | M-011850- polyhomeotic homolog 1 (D             | 1911.00         | PHC1           | 10.69               | 5.95                |
| 50007.00 C05        | M-003903- v-maf musculoaponeurotic f            | 23764.00        | MAFF           | 10.52               | 5.78                |
| 50007.00 C06        | M-011750- profilin 2                            | 5217.00         | PFN2           | 3.28                | 1.46                |
| 50007.00 C07        | M-006824- microtubule-associated prot           | 22919.00        | MAPRE1         | 7.88                | 3.14                |
| 50007.00 C08        | M-013012- prefoldin subunit 4                   | 5203.00         | PFDN4          | 5.65                | 0.91                |

|              |                                           |                   |       |       |
|--------------|-------------------------------------------|-------------------|-------|-------|
| 50007.00 C09 | M-012501- microtubule-associated prot     | 10982.00 MAPRE2   | 5.36  | 0.62  |
| 50007.00 C10 | M-015385- pleckstrin homology domain      | 54477.00 PLEKHA5  | 5.62  | 0.88  |
| 50007.00 C11 | M-012588- MYC-associated zinc finger p    | 4150.00 MAZ       | 3.81  | 0.93  |
| 50007.00 C12 | M-017029- platelet/endothelial cell adh   | 5175.00 PECAM1    | 7.80  | 3.06  |
| 50007.00 C13 | M-013616- methyl-CpG binding domain       | 53615.00 MBD3     | 4.74  | 0.00  |
| 50007.00 C14 | M-016116- PDZ and LIM domain 1 (elfin     | 9124.00 PDLIM1    | 1.60  | 3.14  |
| 50007.00 C15 | M-011080- mannose-binding lectin (pro     | 4153.00 MBL2      | 3.39  | 1.35  |
| 50007.00 C16 | M-004440- programmed cell death 6         | 10016.00 PDCD6    | 12.23 | 7.49  |
| 50007.00 C17 | M-003686- melanoma cell adhesion mo       | 4162.00 MCAM      | 8.86  | 4.12  |
| 50007.00 C18 | M-004437- programmed cell death 2         | 5134.00 PDCD2     | 6.15  | 1.41  |
| 50007.00 C19 | M-017379- minichromosome maintena         | 8888.00 MCM3AP    | 0.67  | 4.07  |
| 50007.00 C20 | M-011747- procollagen C-endopeptidas      | 5118.00 PCOLCE    | 3.33  | 1.41  |
| 50007.00 C21 | M-011081- Mediterranean fever             | 4210.00 MEFV      | 5.49  | 0.75  |
| 50007.00 C23 | M-011082- multiple endocrine neoplasia    | 4221.00 MEN1      | 1.89  | 2.85  |
| 50007.00 D02 | M-003816- transcription factor 7-like 2 ( | 6934.00 TCF7L2    | 5.99  | 1.25  |
| 50007.00 D04 | M-019641- transcription factor 19 (SC1)   | 6941.00 TCF19     | 9.71  | 4.97  |
| 50007.00 D05 | M-013810- PR domain containing 12         | 59335.00 PRDM12   | 3.12  | 1.62  |
| 50007.00 D06 | M-012376- transcription elongation fact   | 6923.00 TCEB2     | 9.36  | 4.62  |
| 50007.00 D07 | M-014346- PR domain containing 14         | 63978.00 PRDM14   | 12.18 | 7.44  |
| 50007.00 D08 | M-016892- Tax1 (human T-cell leukemia     | 8887.00 TAX1BP1   | 2.80  | 1.94  |
| 50007.00 D09 | M-020332- PR domain containing 5          | 11107.00 PRDM5    | 14.19 | 9.45  |
| 50007.00 D10 | M-017430- Tar (HIV-1) RNA binding prot    | 6895.00 TARBP2    | 0.52  | 4.22  |
| 50007.00 D11 | M-015181- PR domain containing 7          | 11105.00 PRDM7    | 2.34  | 2.40  |
| 50007.00 D12 | M-005255- TRAF family member-associ       | 10010.00 TANK     | 6.58  | 1.84  |
| 50007.00 D13 | M-020688- PR domain containing 9          | 56979.00 PRDM9    | 5.31  | 0.57  |
| 50007.00 D14 | M-019979- T-cell acute lymphocytic leu    | 6887.00 TAL2      | 3.95  | 0.79  |
| 50007.00 D15 | M-017655- prolactin regulatory elemen     | 10113.00 PREB     | 1.52  | 3.22  |
| 50007.00 D16 | M-003928- T-cell acute lymphocytic leu    | 6886.00 TAL1      | 1.43  | 3.31  |
| 50007.00 D17 | M-019902- perforin 1 (pore forming pro    | 5551.00 PRF1      | 11.08 | 6.34  |
| 50007.00 D18 | M-017217- TAF9B RNA polymerase II, T      | 51616.00 TAF9B    | 2.93  | 1.81  |
| 50007.00 D19 | M-020069- proteoglycan 3                  | 10394.00 PRG3     | 1.31  | 3.43  |
| 50007.00 D20 | M-020953- zinc finger protein 589         | 51385.00 ZNF589   | 1.34  | 3.40  |
| 50007.00 D21 | M-015402- protein-kinase, interferon-in   | 5612.00 PRKRIR    | 3.95  | 0.79  |
| 50007.00 D23 | M-011497- PRP18 pre-mRNA processing       | 8559.00 PRPF18    | 2.62  | 2.12  |
| 50007.00 E02 | M-013556- protocadherin gamma subfa       | 5098.00 PCDHGC3   | 3.13  | 1.61  |
| 50007.00 E04 | M-011508- protocadherin gamma subfa       | 8641.00 PCDHGB4   | 5.91  | 1.17  |
| 50007.00 E05 | M-021466- milk fat globule-EGF factor 8   | 4240.00 MFGE8     | 5.55  | 0.81  |
| 50007.00 E06 | M-013540- protocadherin gamma subfa       | 9708.00 PCDHGA8   | 4.25  | 0.49  |
| 50007.00 E07 | M-007731- malignant fibrous histiocyto    | 9258.00 MFHAS1    | 17.63 | 12.89 |
| 50007.00 E08 | M-011507- protocadherin gamma subfa       | 26025.00 PCDHGA12 | 10.99 | 6.25  |
| 50007.00 E09 | M-014259- RAS-like, family 11, member     | 65997.00 RASL11B  | 5.24  | 0.50  |
| 50007.00 E10 | M-013525- protocadherin beta 6            | 56130.00 PCDHB6   | 11.24 | 6.50  |
| 50007.00 E11 | M-011084- MHC class I polypeptide-rela    | 4276.00 MICA      | 3.59  | 1.15  |
| 50007.00 E12 | M-013524- protocadherin beta 5            | 26167.00 PCDHB5   | 3.48  | 1.26  |
| 50007.00 E13 | M-012178- MHC class I polypeptide-rela    | 4277.00 MICB      | 7.70  | 2.96  |
| 50007.00 E14 | M-013281- protocadherin beta 4            | 56131.00 PCDHB4   | 11.25 | 6.51  |
| 50007.00 E15 | M-014201- mesoderm induction early r      | 57708.00 MIER1    | 8.10  | 3.36  |

|              |                                         |           |         |              |       |
|--------------|-----------------------------------------|-----------|---------|--------------|-------|
| 50007.00 E16 | M-013282- protocadherin beta 3          | 56132.00  | PCDHB3  | 9.00         | 4.26  |
| 50007.00 E17 | M-009428- protein inhibitor of activate | 9063.00   | PIAS2   | 11.31        | 6.57  |
| 50007.00 E18 | M-013283- protocadherin beta 2          | 56133.00  | PCDHB2  | 6.64         | 1.90  |
| 50007.00 E19 | M-013942- MBD2-interacting zinc finger  | 25988.00  | MIZF    | 1.34         | 3.40  |
| 50007.00 E20 | M-013531- protocadherin beta 15         | 56121.00  | PCDHB15 | 2.37         | 2.37  |
| 50007.00 E21 | M-003280- antigen identified by monoc   | 4288.00   | MKI67   | 4.31         | 0.43  |
| 50007.00 E23 | M-016687- MKI67 (FHA domain) interac    | 84365.00  | MKI67IP | 1.69         | 3.05  |
| 50007.00 F02 | M-016218- synaptotagmin binding, cyto   | 10492.00  | SYNCRIP | 1.83         | 2.91  |
| 50007.00 F04 | M-019864- symplekin                     | 8189.00   | SYMPK   | 2.82         | 1.92  |
| 50007.00 F05 | M-015638- PRP4 pre-mRNA processing      | 9128.00   | PRPF4   | 5.81         | 1.07  |
| 50007.00 F06 | M-011398- supervillin                   | 6840.00   | SVIL    | 4.51         | 0.23  |
| 50007.00 F07 | M-012252- PRP8 pre-mRNA processing      | 10594.00  | PRPF8   | 1.88         | 2.86  |
| 50007.00 F08 | M-015679- stress 70 protein chaperone   | 6782.00   | STCH    | 1.32         | 3.42  |
| 50007.00 F09 | M-031718- periaxin                      | 57716.00  | PRX     | 0.61         | 4.13  |
| 50007.00 F10 | M-017232- synovial sarcoma, X breakpc   | 6759.00   | SSX4    | 1.41         | 3.33  |
| 50007.00 F11 | M-004998- presenilin 1 (Alzheimer disea | 5663.00   | PSEN1   | 4.14         | 0.60  |
| 50007.00 F12 | M-011783- structure specific recognitio | 6749.00   | SSRP1   | <u>10.91</u> | 6.17  |
| 50007.00 F13 | M-017212- proteasome (prosome, maci     | 5708.00   | PSMD2   | 0.64         | 4.10  |
| 50007.00 F14 | M-012264- signal sequence receptor, de  | 6748.00   | SSR4    | 9.44         | 4.70  |
| 50007.00 F15 | M-005163- paxillin                      | 5829.00   | PXN     | 0.20         | 4.54  |
| 50007.00 F16 | M-012374- signal sequence receptor, ga  | 6747.00   | SSR3    | 7.67         | 2.93  |
| 50007.00 F17 | M-008793- RAB26, member RAS oncoge      | 25837.00  | RAB26   | 7.50         | 2.76  |
| 50007.00 F18 | M-010627- sushi-repeat-containing prot  | 8406.00   | SRPX    | 3.56         | 1.18  |
| 50007.00 F19 | M-009920- RAB32, member RAS oncoge      | 10981.00  | RAB32   | <u>15.28</u> | 10.54 |
| 50007.00 F20 | M-014070- spastin                       | 6683.00   | SPAST   | 15.33        | 10.59 |
| 50007.00 F21 | M-008924- RAB40A, member RAS onco       | 142684.00 | RAB40A  | 3.08         | 1.66  |
| 50007.00 F23 | M-008353- RAB40B, member RAS onco       | 10966.00  | RAB40B  | 5.21         | 0.47  |
| 50007.00 G02 | M-013530- protocadherin beta 14         | 56122.00  | PCDHB14 | <u>14.22</u> | 9.48  |
| 50007.00 G04 | M-013528- protocadherin beta 12         | 56124.00  | PCDHB12 | <u>42.12</u> | 37.38 |
| 50007.00 G05 | M-013300- McKusick-Kaufman syndrom      | 8195.00   | MKKS    | 4.01         | 0.73  |
| 50007.00 G06 | M-013527- protocadherin beta 11         | 56125.00  | PCDHB11 | 5.83         | 1.09  |
| 50007.00 G07 | M-015434- megakaryoblastic leukemia     | 57591.00  | MKL1    | 4.77         | 0.03  |
| 50007.00 G08 | M-013278- protocadherin beta 10         | 56126.00  | PCDHB10 | 6.82         | 2.08  |
| 50007.00 G09 | M-019478- myeloid leukemia factor 1     | 4291.00   | MLF1    | 11.24        | 6.50  |
| 50007.00 G10 | M-013658- protocadherin beta 1          | 29930.00  | PCDHB1  | 4.67         | 0.07  |
| 50007.00 G11 | M-003906- mutL homolog 1, colon canc    | 4292.00   | MLH1    | 4.54         | 0.20  |
| 50007.00 G12 | M-013248- protocadherin alpha subfam    | 56134.00  | PCDHAC2 | 6.92         | 2.18  |
| 50007.00 G13 | M-009939- mutL homolog 3 (E. coli)      | 27030.00  | MLH3    | 9.78         | 5.04  |
| 50007.00 G14 | M-013249- protocadherin alpha subfam    | 56135.00  | PCDHAC1 | 3.37         | 1.37  |
| 50007.00 G15 | M-010580- myeloid/lymphoid or mixed     | 55904.00  | MLL5    | <u>22.47</u> | 17.73 |
| 50007.00 G16 | M-013440- protocadherin alpha 9         | 9752.00   | PCDHA9  | 3.47         | 1.27  |
| 50007.00 G17 | M-020075- myeloid/lymphoid or mixed     | 4301.00   | MLLT4   | 2.99         | 1.75  |
| 50007.00 G18 | M-013254- protocadherin alpha 8         | 56140.00  | PCDHA8  | 3.92         | 0.82  |
| 50007.00 G19 | M-010524- myeloid/lymphoid or mixed     | 4302.00   | MLLT6   | 1.88         | 2.86  |
| 50007.00 G20 | M-013255- protocadherin alpha 7         | 56141.00  | PCDHA7  | 5.86         | 1.12  |
| 50007.00 G21 | M-019001- ligand dependent nuclear re   | 254251.00 | LCORL   | 4.80         | 0.06  |
| 50007.00 G23 | M-016320- methylmalonic aciduria (cob   | 166785.00 | MMAA    | 0.95         | 3.79  |

|              |                                          |                  |              |              |
|--------------|------------------------------------------|------------------|--------------|--------------|
| 50007.00 H02 | M-016676- SPARC-like 1 (mast9, hevin)    | 8404.00 SPARCL1  | 3.21         | 1.53         |
| 50007.00 H04 | M-003710- secreted protein, acidic, cyst | 6678.00 SPARC    | 1.51         | 3.23         |
| 50007.00 H05 | M-010368- RAB40C, member RAS oncog       | 57799.00 RAB40C  | 10.62        | 5.88         |
| 50007.00 H06 | M-015429- Sp7 transcription factor       | 121340.00 SP7    | 2.89         | 1.85         |
| 50007.00 H07 | M-008780- RAB4B, member RAS oncog        | 53916.00 RAB4B   | <u>32.47</u> | <b>27.73</b> |
| 50007.00 H08 | M-011875- SP110 nuclear body protein     | 3431.00 SP110    | 7.34         | 2.60         |
| 50007.00 H09 | M-008541- RAB guanine nucleotide excl    | 27342.00 RABGEF1 | 11.93        | 7.19         |
| 50007.00 H10 | M-015307- SP100 nuclear antigen          | 6672.00 SP100    | 7.70         | 2.96         |
| 50007.00 H11 | M-003294- RAD17 homolog (S. pombe)       | 5884.00 RAD17    | 3.22         | 1.52         |
| 50007.00 H12 | M-020142- sorbin and SH3 domain cont     | 10580.00 SORBS1  | 9.45         | 4.71         |
| 50007.00 H13 | M-006832- RAD21 homolog (S. pombe)       | 5885.00 RAD21    | 1.42         | 3.32         |
| 50007.00 H14 | M-012983- SON DNA binding protein        | 6651.00 SON      | 9.57         | 4.83         |
| 50007.00 H15 | M-005231- RAD23 homolog A (S. cerevi:    | 5886.00 RAD23A   | 0.88         | 3.86         |
| 50007.00 H16 | M-027197- suppressor of cytokine signa   | 30837.00 SOCS7   | <u>16.56</u> | <b>11.82</b> |
| 50007.00 H17 | M-011759- RAD23 homolog B (S. cerevi:    | 5887.00 RAD23B   | 11.21        | 6.47         |
| 50007.00 H18 | M-011776- small nuclear ribonucleopro    | 6638.00 SNRPN    | 13.43        | <b>8.69</b>  |
| 50007.00 H19 | M-012295- retinoic acid induced 1        | 10743.00 RAI1    | 1.33         | 3.41         |
| 50007.00 H20 | M-012601- small nuclear RNA activating   | 6619.00 SNAPC3   | 5.62         | 0.88         |
| 50007.00 H21 | M-009235- v-ral simian leukemia viral o  | 5898.00 RALA     | <u>18.48</u> | <b>13.74</b> |
| 50007.00 H23 | M-008403- v-ral simian leukemia viral o  | 5899.00 RALB     | 2.66         | 2.08         |
| 50007.00 I02 | M-013256- protocadherin alpha 6          | 56142.00 PCDHA6  | 3.35         | 1.39         |
| 50007.00 I04 | M-013257- protocadherin alpha 5          | 56143.00 PCDHA5  | 5.34         | 0.60         |
| 50007.00 I05 | M-010525- myeloid cell nuclear differer  | 4332.00 MNDA     | 6.75         | 2.01         |
| 50007.00 I06 | M-013258- protocadherin alpha 4          | 56144.00 PCDHA4  | 4.93         | 0.19         |
| 50007.00 I07 | M-026427- AT rich interactive domain 5   | 84159.00 ARID5B  | 4.90         | 0.16         |
| 50007.00 I08 | M-013259- protocadherin alpha 3          | 56145.00 PCDHA3  | 4.36         | 0.38         |
| 50007.00 I09 | M-019279- MKL/myocardin-like 2           | 57496.00 MKL2    | 5.93         | 1.19         |
| 50007.00 I10 | M-013260- protocadherin alpha 2          | 56146.00 PCDHA2  | 4.51         | 0.23         |
| 50007.00 I11 | M-006373- septin 9                       | 10801.00 SEPT9   | 7.23         | 2.49         |
| 50007.00 I12 | M-013250- protocadherin alpha 13         | 56136.00 PCDHA13 | 9.84         | 5.10         |
| 50007.00 I13 | M-003909- mutS homolog 2, colon canc     | 4436.00 MSH2     | 10.77        | 6.03         |
| 50007.00 I14 | M-013251- protocadherin alpha 12         | 56137.00 PCDHA12 | 1.48         | 3.26         |
| 50007.00 I15 | M-019116- mutS homolog 4 (E. coli)       | 4438.00 MSH4     | 4.11         | 0.63         |
| 50007.00 I16 | M-013252- protocadherin alpha 11         | 56138.00 PCDHA11 | 3.75         | 0.99         |
| 50007.00 I17 | M-011337- mutS homolog 5 (E. coli)       | 4439.00 MSH5     | 2.46         | 2.28         |
| 50007.00 I18 | M-013253- protocadherin alpha 10         | 56139.00 PCDHA10 | 3.84         | 0.90         |
| 50007.00 I19 | M-019287- mutS homolog 6 (E. coli)       | 2956.00 MSH6     | 9.39         | 4.65         |
| 50007.00 I20 | M-013261- protocadherin alpha 1          | 56147.00 PCDHA1  | 4.40         | 0.34         |
| 50007.00 I21 | M-006346- mesothelin                     | 10232.00 MSLN    | 1.48         | 3.26         |
| 50007.00 I23 | M-007370- mitochondrial carrier homol    | 23787.00 MTCH1   | 2.97         | 1.77         |
| 50007.00 J02 | M-017386- snail homolog 2 (Drosophila    | 6591.00 SNAI2    | 7.97         | 3.23         |
| 50007.00 J04 | M-010847- snail homolog 1 (Drosophila    | 6615.00 SNAI1    | 1.75         | 2.99         |
| 50007.00 J05 | M-012007- RANBP2-like and GRIP doma      | 84220.00 RGPD5   | <u>18.62</u> | <b>13.88</b> |
| 50007.00 J06 | M-006837- structural maintenance of ct   | 10051.00 SMC4    | 10.92        | 6.18         |
| 50007.00 J07 | M-011484- RAN binding protein 3          | 8498.00 RANBP3   | 1.45         | 3.29         |
| 50007.00 J08 | M-008312- SWI/SNF related, matrix ass    | 6601.00 SMARCC2  | 1.62         | 3.12         |
| 50007.00 J09 | M-017219- Ras association (RalGDS/AF-    | 11186.00 RASSF1  | 2.83         | 1.91         |



|              |                                            |                    |              |              |
|--------------|--------------------------------------------|--------------------|--------------|--------------|
| 50007.00 J10 | M-006660- solute carrier family 9 (sodi    | 9351.00 SLC9A3R2   | 4.12         | 0.62         |
| 50007.00 J11 | M-010585- Ras association (RaIGDS/AF-      | 83593.00 RASSF5    | 7.41         | 2.67         |
| 50007.00 J12 | M-012286- stem-loop (histone) binding      | 7884.00 SLBP       | 1.75         | 2.99         |
| 50007.00 J13 | M-003299- retinoblastoma-like 2 (p130)     | 5934.00 RBL2       | 10.04        | 5.30         |
| 50007.00 J14 | M-019545- survival of motor neuron pro     | 8487.00 SIP1       | 1.52         | 3.22         |
| 50007.00 J15 | M-015436- RNA binding motif protein 1      | 54033.00 RBM11     | 6.63         | 1.89         |
| 50007.00 J16 | M-012990- SIN3 homolog A, transcriptic     | 25942.00 SIN3A     | 5.80         | 1.06         |
| 50007.00 J17 | M-010854- RNA binding motif protein 1      | 64783.00 RBM15     | 3.38         | 1.36         |
| 50007.00 J18 | M-013430- sialic acid binding Ig-like lect | 89858.00 SIGLEC12  | 5.55         | 0.81         |
| 50007.00 J19 | M-009220- RNA binding motif protein 5      | 10181.00 RBM5      | 5.72         | 0.98         |
| 50007.00 J20 | M-015154- sialic acid binding Ig-like lect | 114132.00 SIGLEC11 | 0.55         | 4.19         |
| 50007.00 J21 | M-020032- RNA binding motif protein 6      | 10180.00 RBM6      | 7.33         | 2.59         |
| 50007.00 J23 | M-011377- RNA binding motif, single str    | 5937.00 RBMS1      | 0.75         | 3.99         |
| 50007.00 K02 | M-011349- protocadherin 8                  | 5100.00 PCDH8      | 5.26         | 0.52         |
| 50007.00 K04 | M-008837- protocadherin 7                  | 5099.00 PCDH7      | 3.96         | 0.78         |
| 50007.00 K05 | M-015905- myocardin                        | 93649.00 MYOCD     | <u>19.10</u> | <b>14.36</b> |
| 50007.00 K06 | M-011509- dachous 1 (Drosophila)           | 8642.00 DCHS1      | 11.45        | 6.71         |
| 50007.00 K07 | M-013486- myosin, heavy chain 1, skele     | 4619.00 MYH1       | 9.72         | 4.98         |
| 50007.00 K08 | M-013654- protocadherin 15                 | 65217.00 PCDH15    | 1.87         | 2.87         |
| 50007.00 K09 | M-011737- myosin, heavy chain 11, smc      | 4629.00 MYH11      | <u>16.26</u> | <b>11.52</b> |
| 50007.00 K10 | M-013621- protocadherin 12                 | 51294.00 PCDH12    | 4.91         | 0.17         |
| 50007.00 K11 | M-012621- myosin, heavy chain 13, skel     | 8735.00 MYH13      | 2.40         | 2.34         |
| 50007.00 K12 | M-013624- protocadherin 11 Y-linked        | 83259.00 PCDH11Y   | 5.47         | 0.73         |
| 50007.00 K13 | M-021252- myosin, heavy chain 2, skele     | 4620.00 MYH2       | 6.99         | 2.25         |
| 50007.00 K14 | M-013619- protocadherin 11 X-linked        | 27328.00 PCDH11X   | 1.96         | 2.78         |
| 50007.00 K15 | M-012645- myosin, heavy chain 6, cardi     | 4624.00 MYH6       | 1.29         | 3.45         |
| 50007.00 K16 | M-010487- protocadherin 1                  | 5097.00 PCDH1      | 7.01         | 2.27         |
| 50007.00 K17 | M-007668- myosin, heavy chain 9, non-i     | 4627.00 MYH9       | 7.57         | 2.83         |
| 50007.00 K18 | M-013201- poly(rC) binding protein 4       | 57060.00 PCBP4     | 1.74         | 3.00         |
| 50007.00 K19 | M-019044- myosin, light chain 9, regula    | 10398.00 MYL9      | 2.01         | 2.73         |
| 50007.00 K20 | M-012002- poly(rC) binding protein 2       | 5094.00 PCBP2      | 3.01         | 1.73         |
| 50007.00 K21 | M-007217- myosin X                         | 4651.00 MYO10      | 2.25         | 2.49         |
| 50007.00 K23 | M-013964- myosin VIIA and Rab interac      | 25924.00 MYRIP     | 4.74         | 0.00         |
| 50007.00 L02 | M-014191- sex hormone-binding globul       | 6462.00 SHBG       | <u>10.03</u> | <b>5.29</b>  |
| 50007.00 L04 | M-013625- spen homolog, transcription      | 23013.00 SPEN      | 2.77         | 1.97         |
| 50007.00 L05 | M-011378- RNA binding motif, single str    | 5939.00 RBMS2      | 3.97         | 0.77         |
| 50007.00 L06 | M-012626- sarcoglycan, epsilon             | 8910.00 SGCE       | 3.46         | 1.28         |
| 50007.00 L07 | M-012967- AT rich interactive domain 4     | 51742.00 ARID4B    | 9.63         | 4.89         |
| 50007.00 L08 | M-015980- surfactant, pulmonary-assoc      | 6441.00 SFTPD      | 12.48        | 7.74         |
| 50007.00 L09 | M-009491- RAS (RAD and GEM)-like GTF       | 28954.00 REM1      | <u>25.25</u> | <b>20.51</b> |
| 50007.00 L10 | M-011893- splicing factor, arginine/seri   | 6433.00 SFRS8      | 9.30         | 4.56         |
| 50007.00 L11 | M-019839- RALBP1 associated Eps domi       | 9185.00 REPS2      | 3.60         | 1.14         |
| 50007.00 L12 | M-015909- splicing factor, arginine/seri   | 6432.00 SFRS7      | <u>19.43</u> | <b>14.69</b> |
| 50007.00 L13 | M-019061- replication factor C (activatc   | 5982.00 RFC2       | <u>13.83</u> | <b>9.09</b>  |
| 50007.00 L14 | M-030081- splicing factor, arginine/seri   | 6428.00 SFRS3      | 5.19         | 0.45         |
| 50007.00 L15 | M-008691- replication factor C (activatc   | 5984.00 RFC4       | 2.23         | 2.51         |
| 50007.00 L16 | M-019711- splicing factor, arginine/seri   | 6427.00 SFRS2      | 4.49         | 0.25         |

|              |                                          |                   |              |              |
|--------------|------------------------------------------|-------------------|--------------|--------------|
| 50007.00 L17 | M-013577- regulatory factor X, 4 (influe | 5992.00 RFX4      | 2.87         | 1.87         |
| 50007.00 L18 | M-011929- splicing factor, arginine/seri | 9295.00 SFRS11    | <u>15.66</u> | <b>10.92</b> |
| 50007.00 L19 | M-009389- Rho-related BTB domain cor     | 9886.00 RHOBTB1   | 4.18         | 0.56         |
| 50007.00 L20 | M-006455- splicing factor proline/glutar | 6421.00 SFPQ      | 0.60         | 4.14         |
| 50007.00 L21 | M-009252- Rho-related BTB domain cor     | 23221.00 RHOBTB2  | 2.91         | 1.83         |
| 50007.00 L23 | M-015388- PDZ and LIM domain 4           | 8572.00 PDLIM4    | 0.95         | 3.79         |
| 50007.00 M02 | M-020387- zinc finger protein 395        | 55893.00 ZNF395   | 1.67         | 3.07         |
| 50007.00 M04 | M-012242- paired box gene 9              | 5083.00 PAX9      | 1.74         | 3.00         |
| 50007.00 M05 | M-009258- A kinase (PRKA) anchor prot    | 26993.00 AKAP8L   | <u>22.44</u> | <b>17.70</b> |
| 50007.00 M06 | M-012241- paired box gene 5 (B-cell line | 5079.00 PAX5      | <u>16.38</u> | <b>11.64</b> |
| 50007.00 M07 | M-019113- NLR family, pyrin domain co    | 338322.00 NLRP10  | <u>22.35</u> | <b>17.61</b> |
| 50007.00 M08 | M-020120- paired box gene 1              | 5075.00 PAX1      | 7.24         | 2.50         |
| 50007.00 M09 | M-018073- NLR family, pyrin domain co    | 126204.00 NLRP13  | 6.39         | 1.65         |
| 50007.00 M10 | M-005287- parvin, alpha                  | 55742.00 PARVA    | 1.92         | 2.82         |
| 50007.00 M11 | M-019075- NLR family, pyrin domain co    | 338323.00 NLRP14  | <u>19.90</u> | <b>15.16</b> |
| 50007.00 M12 | M-015602- par-3 partitioning defective   | 56288.00 PARD3    | 5.51         | 0.77         |
| 50007.00 M13 | M-020253- NLR family, pyrin domain co    | 55655.00 NLRP2    | 7.30         | 2.56         |
| 50007.00 M14 | M-011744- regenerating islet-derived 3   | 5068.00 REG3A     | 1.61         | 3.13         |
| 50007.00 M15 | M-009641- nibrin                         | 4683.00 NBN       | 9.03         | 4.29         |
| 50007.00 M16 | M-015343- protein kinase C and casein I  | 29763.00 PACSIN3  | 7.68         | 2.94         |
| 50007.00 M17 | M-012561- neural cell adhesion molecu    | 4684.00 NCAM1     | 7.05         | 2.31         |
| 50007.00 M18 | M-016608- osteoclast stimulating factor  | 26578.00 OSTF1    | 5.19         | 0.45         |
| 50007.00 M19 | M-010613- neural cell adhesion molecu    | 4685.00 NCAM2     | <u>15.94</u> | <b>11.20</b> |
| 50007.00 M20 | M-020118- periostin, osteoblast specific | 10631.00 POSTN    | 11.15        | 6.41         |
| 50007.00 M21 | M-019672- nuclear cap binding protein :  | 4686.00 NCBP1     | 9.36         | 4.62         |
| 50007.00 M23 | M-013101- necdin homolog (mouse)         | 4692.00 NDN       | 5.77         | 1.03         |
| 50007.00 N02 | M-019808- splicing factor 3a, subunit 3, | 10946.00 SF3A3    | 3.94         | 0.80         |
| 50007.00 N04 | M-016051- splicing factor 3a, subunit 1, | 10291.00 SF3A1    | 2.39         | 2.35         |
| 50007.00 N05 | M-008390- Ras-like without CAAX 1        | 6016.00 RIT1      | 5.25         | 0.51         |
| 50007.00 N06 | M-019260- septin 6                       | 23157.00 SEPT6    | 9.78         | 5.04         |
| 50007.00 N07 | M-012298- RNA binding protein S1, seri   | 10921.00 RNPS1    | 3.69         | 1.05         |
| 50007.00 N08 | M-017317- septin 3                       | 55964.00 SEPT3    | 1.50         | 3.24         |
| 50007.00 N09 | M-013329- snurportin 1                   | 10073.00 SNUPN    | 2.41         | 2.33         |
| 50007.00 N10 | M-013443- septin 1                       | 1731.00 SEPT1     | 4.80         | 0.06         |
| 50007.00 N11 | M-008199- retinal pigment epithelium-s   | 6121.00 RPE65     | 5.84         | 1.10         |
| 50007.00 N12 | M-013850- selenoprotein N, 1             | 57190.00 SEPN1    | 2.82         | 1.92         |
| 50007.00 N13 | M-019356- retinitis pigmentosa GTPase    | 6103.00 RPGR      | 9.75         | 5.01         |
| 50007.00 N14 | M-008079- selectin P (granule membrar    | 6403.00 SELP      | 10.67        | 5.93         |
| 50007.00 N15 | M-016070- Ras-related GTP binding A      | 10670.00 RRAGA    | 3.55         | 1.19         |
| 50007.00 N16 | M-013468- selenium binding protein 1     | 8991.00 SELENBP1  | 16.42        | <b>11.68</b> |
| 50007.00 N17 | M-019359- retinoschisis (X-linked, juven | 6247.00 RS1       | 7.36         | 2.62         |
| 50007.00 N18 | M-008077- selectin E (endothelial adhes  | 6401.00 SELE      | 9.40         | 4.66         |
| 50007.00 N19 | M-005294- CAP-GLY domain containing      | 6249.00 CLIP1     | 4.63         | 0.11         |
| 50007.00 N20 | M-011963- SEC22 vesicle trafficking pro  | 9554.00 SEC22B    | <u>15.27</u> | <b>10.53</b> |
| 50007.00 N21 | M-012666- runt-related transcription fa  | 864.00 RUNX3      | 6.88         | 2.14         |
| 50007.00 N23 | M-012258- S100 calcium binding protei    | 6271.00 S100A1    | 3.04         | 1.70         |
| 50007.00 O02 | M-008350- oxysterol binding protein-lik  | 114876.00 OSBPL1A | 8.27         | 3.53         |

|                     |                                              |                       |                     |              |
|---------------------|----------------------------------------------|-----------------------|---------------------|--------------|
| 50007.00 O04        | M-009747- oxysterol binding protein          | 5007.00 OSBP          | 2.13                | 2.61         |
| 50007.00 O05        | M-009358- neogenin homolog 1 (chicke         | 4756.00 NEO1          | 1.60                | 3.14         |
| 50007.00 O06        | M-003288- origin recognition complex, :      | 23594.00 ORC6L        | 9.86                | 5.12         |
| 50007.00 O07        | M-004765- nuclear factor of kappa light      | 4792.00 NFKBIA        | 2.03                | 2.71         |
| 50007.00 O08        | M-009113- oligodendrocyte lineage tra        | 10215.00 OLIG2        | 1.16                | 3.58         |
| 50007.00 O09        | M-015321- nescient helix loop helix 1        | 4807.00 NHLH1         | 1.67                | 3.07         |
| 50007.00 O10        | M-010857- nucleobindin 2                     | 4925.00 NUCB2         | 4.74                | 0.00         |
| 50007.00 O11        | M-019241- nidogen 2 (osteonidogen)           | 22795.00 NID2         | 6.58                | 1.84         |
| 50007.00 O12        | M-015822- nucleobindin 1                     | 4924.00 NUCB1         | 5.42                | 0.68         |
| 50007.00 O13        | M-017671- ninjurin 1                         | 4814.00 NINJ1         | 2.50                | 2.24         |
| 50007.00 O14        | M-004705- nucleotide binding protein 2       | 10101.00 NUBP2        | 5.99                | 1.25         |
| 50007.00 O15        | M-004432- nucleolar protein 3 (apoptos       | 8996.00 NOL3          | 3.35                | 1.39         |
| 50007.00 O16        | M-019603- nucleotide binding protein 1       | 4682.00 NUBP1         | 0.66                | 4.08         |
| 50007.00 O17        | M-019843- nucleolar and coiled-body pl       | 9221.00 NOLC1         | 3.47                | 1.27         |
| <b>50007.00 O18</b> | <b>M-012186- neurogranin (protein kinase</b> | <b>4900.00 NRGN</b>   | <b><u>15.61</u></b> | <b>10.87</b> |
| 50007.00 O19        | M-011342- neuro-oncological ventral ar       | 4857.00 NOVA1         | 4.26                | 0.48         |
| 50007.00 O20        | M-019920- neuronal cell adhesion mole        | 4897.00 NRCAM         | 5.17                | 0.43         |
| 50007.00 O21        | M-012590- neuro-oncological ventral ar       | 4858.00 NOVA2         | 2.28                | 2.46         |
| 50007.00 O23        | M-008644- nephrosis 1, congenital, Finr      | 4868.00 NPHS1         | 7.99                | 3.25         |
| 50007.00 P02        | M-015910- serum deprivation response         | 8436.00 SDPR          | 2.71                | 2.03         |
| 50007.00 P04        | M-003706- syndecan 4                         | 6385.00 SDC4          | 1.15                | 3.59         |
| 50007.00 P05        | M-012138- S100 calcium binding protei        | 6282.00 S100A11       | 5.16                | 0.42         |
| 50007.00 P06        | M-003642- signal peptide, CUB domain,        | 57758.00 SCUBE2       | 3.95                | 0.79         |
| 50007.00 P07        | M-027738- S100 calcium binding protei        | 6284.00 S100A13       | 2.57                | 2.17         |
| 50007.00 P08        | M-009876- sterol carrier protein 2           | 6342.00 SCP2          | 8.40                | 3.66         |
| 50007.00 P09        | M-010723- S100 calcium binding protei        | 57402.00 S100A14      | 0.11                | 4.63         |
| 50007.00 P10        | M-011987- SCO cytochrome oxidase dei         | 9997.00 SCO2          | 2.65                | 2.09         |
| <b>50007.00 P11</b> | <b>M-012191- S100 calcium binding protei</b> | <b>6273.00 S100A2</b> | <b><u>14.83</u></b> | <b>10.09</b> |
| 50007.00 P12        | M-003705- secretoglobin, family 2A, me       | 4250.00 SCGB2A2       | 7.08                | 2.34         |
| 50007.00 P13        | M-011767- S100 calcium binding protei        | 6274.00 S100A3        | 9.22                | 4.48         |
| 50007.00 P14        | M-011422- secretogranin II (chromograi       | 7857.00 SCG2          | 10.53               | 5.79         |
| 50007.00 P15        | M-004792- S100 calcium binding protei        | 6275.00 S100A4        | 1.40                | 3.34         |
| 50007.00 P16        | M-011106- ataxin 7                           | 6314.00 ATXN7         | 0.61                | 4.13         |
| <b>50007.00 P17</b> | <b>M-011770- S100 calcium binding protei</b> | <b>6279.00 S100A8</b> | <b><u>20.80</u></b> | <b>16.06</b> |
| 50007.00 P18        | M-004510- ataxin 1                           | 6310.00 ATXN1         | 4.68                | 0.06         |
| 50007.00 P19        | M-004295- S100 calcium binding protei        | 6286.00 S100P         | 4.94                | 0.20         |
| 50007.00 P20        | M-007033- sal-like 4 (Drosophila)            | 57167.00 SALL4        | 8.47                | 3.73         |
| 50007.00 P21        | M-006560- sal-like 1 (Drosophila)            | 6299.00 SALL1         | 1.05                | 3.69         |
| 50007.00 P23        | M-006973- sal-like 3 (Drosophila)            | 27164.00 SALL3        | 3.37                | 1.37         |
|                     |                                              | mdn                   | 4.74                | 2.75         |
|                     |                                              | 3MAD                  |                     | 8.24         |
|                     |                                              | MADc                  |                     | 4.07         |
| 50007.00 C22        |                                              |                       | 56.72               |              |
| 50007.00 D22        |                                              |                       | 52.77               |              |
| 50007.00 E22        |                                              |                       | 54.97               |              |
| 50007.00 F22        |                                              |                       | 55.33               |              |
|                     |                                              | <b>m</b>              | <b>54.95</b>        |              |

|              |                                            |         |              |       |
|--------------|--------------------------------------------|---------|--------------|-------|
|              |                                            |         | sd           | 1.64  |
| 50007.00 G22 |                                            |         |              | 20.97 |
| 50007.00 H22 |                                            |         |              | 26.20 |
| 50007.00 I22 |                                            |         |              | 29.20 |
| 50007.00 J22 |                                            |         |              | 19.22 |
| 50007.00 K22 |                                            |         |              | 14.35 |
|              |                                            |         | m            | 22.24 |
|              |                                            |         | sd           | 6.72  |
|              |                                            |         | 3psSD        | 4.91  |
|              |                                            |         | 3ngSD        | 20.16 |
|              |                                            |         | SM SD        | 25.07 |
|              |                                            |         | Mn Diff      | 32.70 |
|              |                                            |         | SMovrMn      | 0.77  |
|              |                                            |         | 1-SMovrMn    | 0.23  |
| 50007.00 G03 | M-003290- polo-like kinase 1 (Drosophil    | 5347.00 | PLK1 SMARTpo | 8.11  |
| 50007.00 H03 | M-003290- polo-like kinase 1 (Drosophil    | 5347.00 | PLK1 SMARTpo | 3.36  |
| 50007.00 I03 | D-001206-∴siControl non-targeting siRNA #2 |         |              | 1.71  |
| 50007.00 J03 | D-001206-∴siControl non-targeting siRNA #2 |         |              | 2.41  |
| 50007.00 K03 | D-001600-∴siGLO RISC-free siRNA            |         |              | 20.14 |
| 50007.00 L03 | D-001600-∴siGLO RISC-free siRNA            |         |              | 29.10 |

| <u>robust Z</u> | <u>% inf</u> | <u>abs dev</u> | <u>robust Z</u> | <u>% inf</u> | <u>abs dev</u> | <u>robust Z</u> |
|-----------------|--------------|----------------|-----------------|--------------|----------------|-----------------|
| 0.89            | 1.94         | 2.01           | 0.62            | 1.41         | 2.38           | 0.80            |
| 0.50            | 0.99         | 2.96           | 0.91            | 2.67         | 1.12           | 0.38            |
| 0.79            | 3.98         | 0.03           | 0.01            | 4.04         | 0.25           | 0.08            |
| 0.90            | 2.71         | 1.24           | 0.38            | 5.78         | 1.99           | 0.67            |
| 0.65            | 2.72         | 1.23           | 0.38            | 24.79        | 21.00          | 7.05            |
| 0.27            | 4.10         | 0.15           | 0.04            | 5.86         | 2.07           | 0.70            |
| 0.13            | 2.38         | 1.57           | 0.48            | 5.78         | 1.99           | 0.67            |
| 0.21            | 4.47         | 0.52           | 0.16            | 3.65         | 0.14           | 0.05            |
| 0.86            | 1.46         | 2.49           | 0.76            | 1.98         | 1.81           | 0.61            |
| 0.62            | 7.91         | 3.96           | 1.22            | 8.96         | 5.17           | 1.74            |
| 1.04            | 2.73         | 1.22           | 0.37            | 2.46         | 1.33           | 0.44            |
| 0.10            | 3.70         | 0.25           | 0.08            | 1.98         | 1.81           | 0.61            |
| 0.78            | 0.66         | 3.29           | 1.01            | 1.77         | 2.02           | 0.68            |
| 1.48            | 9.04         | 5.09           | 1.56            | 11.39        | 7.60           | 2.55            |
| 0.98            | 1.04         | 2.91           | 0.90            | 1.96         | 1.83           | 0.61            |
| 1.05            | 0.92         | 3.03           | 0.93            | 0.54         | 3.25           | 1.09            |
| 0.40            | 2.41         | 1.54           | 0.47            | 4.78         | 0.99           | 0.33            |
| 0.04            | 2.54         | 1.41           | 0.43            | 2.72         | 1.07           | 0.36            |
| 0.99            | 5.57         | 1.62           | 0.50            | 4.66         | 0.87           | 0.29            |
| 0.80            | 3.54         | 0.41           | 0.13            | 1.23         | 2.56           | 0.86            |
| 1.50            | 5.74         | 1.79           | 0.55            | 3.09         | 0.70           | 0.24            |
| 0.64            | 1.72         | 2.23           | 0.69            | 0.60         | 3.19           | 1.07            |
| 0.24            | 0.31         | 3.64           | 1.12            | 0.89         | 2.90           | 0.97            |
| 0.46            | 2.12         | 1.83           | 0.56            | 2.28         | 1.51           | 0.51            |
| 3.83            | 15.47        | 11.52          | 3.55            | 16.80        | 13.01          | 4.36 y          |
| 0.37            | 2.27         | 1.68           | 0.52            | 2.23         | 1.56           | 0.52            |
| 0.90            | 3.54         | 0.41           | 0.13            | 1.15         | 2.64           | 0.89            |
| 0.95            | 9.12         | 5.17           | 1.59            | 8.52         | 4.73           | 1.59            |
| 0.82            | 2.76         | 1.19           | 0.37            | 7.91         | 4.12           | 1.38            |
| 0.98            | 3.88         | 0.07           | 0.02            | 0.13         | 3.66           | 1.23            |
| 1.00            | 0.71         | 3.24           | 1.00            | 0.15         | 3.64           | 1.22            |
| 0.23            | 2.01         | 1.94           | 0.60            | 2.36         | 1.43           | 0.48            |
| 1.51            | 3.53         | 0.42           | 0.13            | 8.51         | 4.72           | 1.58            |
| 0.73            | 6.96         | 3.01           | 0.93            | 5.05         | 1.26           | 0.42            |
| 0.26            | 1.42         | 2.53           | 0.78            | 1.75         | 2.04           | 0.68            |
| 0.26            | 3.12         | 0.83           | 0.26            | 3.09         | 0.70           | 0.23            |
| 0.27            | 1.79         | 2.16           | 0.66            | 4.03         | 0.24           | 0.08            |
| 2.48            | 8.87         | 4.92           | 1.51            | 14.26        | 10.47          | 3.51 y          |
| 1.04            | 0.59         | 3.36           | 1.03            | 1.03         | 2.76           | 0.93            |
| 0.87            | 0.48         | 3.47           | 1.07            | 3.79         | 0.00           | 0.00            |
| 0.62            | 6.12         | 2.17           | 0.67            | 3.04         | 0.75           | 0.25            |
| 1.46            | 14.62        | 10.67          | 3.28            | 6.74         | 2.95           | 0.99            |
| 1.42            | 7.01         | 3.06           | 0.94            | 13.76        | 9.97           | 3.35            |
| 0.36            | 5.19         | 1.24           | 0.38            | 2.49         | 1.30           | 0.43            |
| 0.77            | 6.07         | 2.12           | 0.65            | 4.82         | 1.03           | 0.34            |
| 0.22            | 4.74         | 0.79           | 0.24            | 7.12         | 3.33           | 1.12            |

|      |       |       |      |       |       |        |
|------|-------|-------|------|-------|-------|--------|
| 0.15 | 6.68  | 2.73  | 0.84 | 5.81  | 2.02  | 0.68   |
| 0.22 | 6.52  | 2.57  | 0.79 | 6.02  | 2.23  | 0.75   |
| 0.23 | 6.41  | 2.46  | 0.76 | 4.12  | 0.33  | 0.11   |
| 0.75 | 2.72  | 1.23  | 0.38 | 2.86  | 0.93  | 0.31   |
| 0.00 | 0.76  | 3.19  | 0.98 | 2.17  | 1.62  | 0.54   |
| 0.77 | 2.95  | 1.00  | 0.31 | 1.66  | 2.13  | 0.71   |
| 0.33 | 3.54  | 0.41  | 0.12 | 3.55  | 0.24  | 0.08   |
| 1.84 | 5.82  | 1.87  | 0.58 | 5.76  | 1.97  | 0.66   |
| 1.01 | 2.32  | 1.64  | 0.50 | 3.70  | 0.09  | 0.03   |
| 0.35 | 3.60  | 0.35  | 0.11 | 4.65  | 0.86  | 0.29   |
| 1.00 | 1.83  | 2.12  | 0.65 | 0.65  | 3.14  | 1.05   |
| 0.35 | 1.43  | 2.52  | 0.78 | 0.63  | 3.16  | 1.06   |
| 0.18 | 6.24  | 2.29  | 0.71 | 3.80  | 0.01  | 0.00   |
| 0.70 | 0.90  | 3.05  | 0.94 | 0.98  | 2.81  | 0.94   |
| 0.31 | 10.33 | 6.38  | 1.96 | 6.57  | 2.78  | 0.93   |
| 1.22 | 11.20 | 7.25  | 2.23 | 14.75 | 10.96 | 3.68 y |
| 0.40 | 5.64  | 1.69  | 0.52 | 4.75  | 0.96  | 0.32   |
| 1.13 | 2.30  | 1.65  | 0.51 | 3.52  | 0.27  | 0.09   |
| 1.83 | 8.80  | 4.85  | 1.49 | 11.24 | 7.45  | 2.50   |
| 0.48 | 3.75  | 0.20  | 0.06 | 1.79  | 2.00  | 0.67   |
| 2.32 | 17.38 | 13.43 | 4.13 | 27.39 | 23.60 | 7.92 y |
| 1.04 | 2.82  | 1.13  | 0.35 | 0.62  | 3.17  | 1.06   |
| 0.59 | 1.86  | 2.09  | 0.64 | 3.29  | 0.50  | 0.17   |
| 0.45 | 8.21  | 4.26  | 1.31 | 8.28  | 4.49  | 1.51   |
| 0.14 | 7.43  | 3.48  | 1.07 | 9.27  | 5.48  | 1.84   |
| 0.19 | 3.68  | 0.27  | 0.08 | 1.42  | 2.37  | 0.80   |
| 0.79 | 5.92  | 1.97  | 0.60 | 1.98  | 1.81  | 0.61   |
| 0.81 | 2.17  | 1.78  | 0.55 | 3.08  | 0.71  | 0.24   |
| 1.56 | 20.25 | 16.30 | 5.02 | 17.61 | 13.82 | 4.64 y |
| 0.45 | 3.96  | 0.01  | 0.00 | 3.75  | 0.04  | 0.01   |
| 0.84 | 3.89  | 0.06  | 0.02 | 1.54  | 2.25  | 0.75   |
| 0.84 | 5.87  | 1.92  | 0.59 | 2.05  | 1.74  | 0.59   |
| 0.19 | 10.86 | 6.91  | 2.12 | 6.67  | 2.88  | 0.97   |
| 0.52 | 3.24  | 0.71  | 0.22 | 3.44  | 0.35  | 0.12   |
| 0.39 | 2.79  | 1.16  | 0.36 | 3.19  | 0.60  | 0.20   |
| 0.29 | 12.29 | 8.34  | 2.57 | 5.94  | 2.15  | 0.72   |
| 0.20 | 9.27  | 5.32  | 1.64 | 4.36  | 0.57  | 0.19   |
| 0.12 | 6.62  | 2.67  | 0.82 | 5.34  | 1.55  | 0.52   |
| 3.17 | 10.74 | 6.79  | 2.09 | 9.36  | 5.57  | 1.87 y |
| 1.54 | 20.72 | 16.77 | 5.16 | 24.96 | 21.17 | 7.10 y |
| 0.12 | 7.49  | 3.54  | 1.09 | 6.64  | 2.85  | 0.96   |
| 1.60 | 15.81 | 11.86 | 3.65 | 7.95  | 4.16  | 1.40   |
| 0.28 | 8.46  | 4.51  | 1.39 | 5.99  | 2.20  | 0.74   |
| 0.31 | 3.62  | 0.33  | 0.10 | 3.47  | 0.32  | 0.11   |
| 0.73 | 15.93 | 11.98 | 3.68 | 19.38 | 15.59 | 5.23 y |
| 1.60 | 28.99 | 25.04 | 7.70 | 22.60 | 18.81 | 6.31 y |
| 0.83 | 10.74 | 6.79  | 2.09 | 10.92 | 7.13  | 2.39 y |

|      |       |       |       |       |       |         |
|------|-------|-------|-------|-------|-------|---------|
| 1.05 | 14.93 | 10.98 | 3.38  | 10.11 | 6.32  | 2.12 y  |
| 1.61 | 10.00 | 6.05  | 1.86  | 16.19 | 12.40 | 4.16    |
| 0.47 | 9.64  | 5.69  | 1.75  | 6.39  | 2.60  | 0.87    |
| 0.84 | 2.64  | 1.31  | 0.40  | 2.14  | 1.65  | 0.55    |
| 0.58 | 5.03  | 1.08  | 0.33  | 3.99  | 0.20  | 0.07    |
| 0.11 | 2.57  | 1.38  | 0.43  | 5.54  | 1.75  | 0.59    |
| 0.75 | 2.01  | 1.94  | 0.60  | 3.63  | 0.16  | 0.05    |
| 0.72 | 2.91  | 1.04  | 0.32  | 3.96  | 0.17  | 0.06    |
| 0.47 | 2.72  | 1.23  | 0.38  | 1.40  | 2.39  | 0.80    |
| 0.26 | 4.31  | 0.36  | 0.11  | 8.10  | 4.31  | 1.44    |
| 0.06 | 4.76  | 0.81  | 0.25  | 7.27  | 3.48  | 1.17    |
| 0.70 | 6.87  | 2.92  | 0.90  | 5.26  | 1.47  | 0.49    |
| 0.84 | 1.28  | 2.67  | 0.82  | 2.70  | 1.09  | 0.37    |
| 1.01 | 3.99  | 0.04  | 0.01  | 1.41  | 2.38  | 0.80    |
| 0.82 | 2.82  | 1.13  | 0.35  | 2.68  | 1.11  | 0.37    |
| 0.15 | 3.66  | 0.29  | 0.09  | 1.54  | 2.25  | 0.75    |
| 1.52 | 15.62 | 11.67 | 3.59  | 12.62 | 8.83  | 2.96 y  |
| 1.01 | 2.92  | 1.03  | 0.32  | 1.95  | 1.84  | 0.62    |
| 1.16 | 6.64  | 2.69  | 0.83  | 2.74  | 1.05  | 0.35    |
| 1.11 | 1.43  | 2.52  | 0.78  | 0.57  | 3.22  | 1.08    |
| 0.72 | 2.51  | 1.44  | 0.44  | 7.40  | 3.61  | 1.21    |
| 0.68 | 7.05  | 3.10  | 0.96  | 7.36  | 3.57  | 1.20    |
| 0.29 | 6.76  | 2.81  | 0.86  | 4.34  | 0.55  | 0.19    |
| 2.59 | 9.60  | 5.65  | 1.74  | 11.47 | 7.68  | 2.58 y  |
| 2.60 | 9.08  | 5.13  | 1.58  | 8.67  | 4.88  | 1.64    |
| 0.41 | 1.25  | 2.70  | 0.83  | 1.44  | 2.35  | 0.79    |
| 0.12 | 5.36  | 1.41  | 0.43  | 4.64  | 0.85  | 0.28    |
| 2.33 | 8.02  | 4.07  | 1.25  | 16.77 | 12.98 | 4.36 y  |
| 9.19 | 43.83 | 39.88 | 12.27 | 41.67 | 37.88 | 12.71 y |
| 0.18 | 1.57  | 2.38  | 0.73  | 1.78  | 2.01  | 0.67    |
| 0.27 | 3.08  | 0.87  | 0.27  | 4.64  | 0.85  | 0.29    |
| 0.01 | 6.14  | 2.19  | 0.67  | 6.59  | 2.80  | 0.94    |
| 0.51 | 5.37  | 1.42  | 0.44  | 5.98  | 2.19  | 0.73    |
| 1.60 | 9.22  | 5.27  | 1.62  | 15.87 | 12.08 | 4.05    |
| 0.02 | 1.20  | 2.75  | 0.85  | 4.09  | 0.30  | 0.10    |
| 0.05 | 3.21  | 0.74  | 0.23  | 5.30  | 1.51  | 0.51    |
| 0.54 | 2.91  | 1.04  | 0.32  | 2.13  | 1.66  | 0.56    |
| 1.24 | 7.93  | 3.98  | 1.22  | 6.39  | 2.60  | 0.87    |
| 0.34 | 4.39  | 0.44  | 0.14  | 9.35  | 5.56  | 1.87    |
| 4.36 | 8.46  | 4.51  | 1.39  | 26.31 | 22.52 | 7.56 y  |
| 0.31 | 3.47  | 0.48  | 0.15  | 3.46  | 0.33  | 0.11    |
| 0.43 | 1.94  | 2.01  | 0.62  | 1.78  | 2.01  | 0.67    |
| 0.20 | 1.40  | 2.55  | 0.79  | 1.73  | 2.06  | 0.69    |
| 0.70 | 0.99  | 2.96  | 0.91  | 2.88  | 0.91  | 0.30    |
| 0.27 | 3.87  | 0.08  | 0.02  | 6.55  | 2.76  | 0.93    |
| 0.01 | 2.39  | 1.56  | 0.48  | 7.59  | 3.80  | 1.28    |
| 0.93 | 0.98  | 2.97  | 0.91  | 4.55  | 0.76  | 0.25    |

|      |       |       |      |       |       |        |
|------|-------|-------|------|-------|-------|--------|
| 0.38 | 6.14  | 2.19  | 0.67 | 5.54  | 1.75  | 0.59   |
| 0.79 | 2.25  | 1.70  | 0.52 | 3.09  | 0.70  | 0.24   |
| 1.45 | 4.61  | 0.66  | 0.20 | 13.50 | 9.71  | 3.26   |
| 0.45 | 0.84  | 3.11  | 0.96 | 1.98  | 1.81  | 0.61   |
| 6.81 | 34.02 | 30.07 | 9.25 | 27.30 | 23.51 | 7.89 y |
| 0.64 | 7.91  | 3.96  | 1.22 | 5.05  | 1.26  | 0.42   |
| 1.77 | 10.53 | 6.58  | 2.03 | 15.15 | 11.36 | 3.81 y |
| 0.73 | 2.22  | 1.73  | 0.53 | 4.76  | 0.97  | 0.33   |
| 0.37 | 2.70  | 1.25  | 0.38 | 3.44  | 0.35  | 0.12   |
| 1.16 | 10.95 | 7.00  | 2.15 | 10.31 | 6.52  | 2.19 y |
| 0.82 | 1.10  | 2.85  | 0.88 | 3.67  | 0.12  | 0.04   |
| 1.19 | 8.56  | 4.61  | 1.42 | 6.65  | 2.86  | 0.96   |
| 0.95 | 2.62  | 1.33  | 0.41 | 2.07  | 1.72  | 0.58   |
| 2.90 | 13.92 | 9.97  | 3.07 | 12.12 | 8.33  | 2.80 y |
| 1.59 | 6.59  | 2.64  | 0.81 | 5.92  | 2.13  | 0.72   |
| 2.13 | 10.07 | 6.12  | 1.88 | 7.66  | 3.87  | 1.30   |
| 0.84 | 0.66  | 3.29  | 1.01 | 1.81  | 1.98  | 0.66   |
| 0.22 | 4.88  | 0.93  | 0.28 | 3.90  | 0.11  | 0.04   |
| 3.38 | 13.81 | 9.86  | 3.03 | 28.75 | 24.96 | 8.38 y |
| 0.51 | 0.71  | 3.24  | 1.00 | 2.25  | 1.54  | 0.52   |
| 0.34 | 2.48  | 1.47  | 0.45 | 5.16  | 1.37  | 0.46   |
| 0.15 | 4.70  | 0.75  | 0.23 | 5.25  | 1.46  | 0.49   |
| 0.50 | 3.62  | 0.33  | 0.10 | 7.21  | 3.42  | 1.15   |
| 0.05 | 3.80  | 0.15  | 0.05 | 3.05  | 0.74  | 0.25   |
| 0.04 | 2.78  | 1.17  | 0.36 | 2.77  | 1.02  | 0.34   |
| 0.09 | 0.67  | 3.28  | 1.01 | 1.60  | 2.19  | 0.74   |
| 0.29 | 3.42  | 0.53  | 0.16 | 3.82  | 0.03  | 0.01   |
| 0.06 | 0.75  | 3.20  | 0.99 | 3.92  | 0.13  | 0.04   |
| 0.61 | 0.93  | 3.02  | 0.93 | 3.05  | 0.74  | 0.25   |
| 1.25 | 4.66  | 0.71  | 0.22 | 5.20  | 1.41  | 0.47   |
| 1.48 | 5.25  | 1.30  | 0.40 | 6.45  | 2.66  | 0.89   |
| 0.80 | 0.43  | 3.52  | 1.08 | 2.65  | 1.14  | 0.38   |
| 0.15 | 4.09  | 0.14  | 0.04 | 3.39  | 0.40  | 0.14   |
| 0.24 | 1.15  | 2.80  | 0.86 | 0.90  | 2.89  | 0.97   |
| 0.56 | 1.32  | 2.63  | 0.81 | 2.17  | 1.62  | 0.54   |
| 0.22 | 0.32  | 3.63  | 1.12 | 1.26  | 2.53  | 0.85   |
| 1.14 | 0.97  | 2.98  | 0.92 | 3.56  | 0.23  | 0.08   |
| 0.08 | 1.71  | 2.24  | 0.69 | 3.78  | 0.01  | 0.00   |
| 0.80 | 0.32  | 3.63  | 1.12 | 0.95  | 2.84  | 0.95   |
| 0.43 | 0.44  | 3.51  | 1.08 | 0.84  | 2.95  | 0.99   |
| 0.79 | 5.64  | 1.69  | 0.52 | 4.80  | 1.01  | 0.34   |
| 0.74 | 4.07  | 0.12  | 0.04 | 1.59  | 2.20  | 0.74   |
| 3.41 | 16.88 | 12.93 | 3.98 | 17.49 | 13.70 | 4.60 y |
| 1.52 | 9.58  | 5.63  | 1.73 | 8.49  | 4.70  | 1.58   |
| 0.81 | 2.15  | 1.80  | 0.55 | 2.13  | 1.66  | 0.56   |
| 0.77 | 2.87  | 1.08  | 0.33 | 3.13  | 0.66  | 0.22   |
| 0.47 | 1.96  | 1.99  | 0.61 | 1.53  | 2.26  | 0.76   |



|      |       |       |      |       |       |        |
|------|-------|-------|------|-------|-------|--------|
| 0.15 | 3.31  | 0.64  | 0.20 | 3.85  | 0.06  | 0.02   |
| 0.66 | 4.72  | 0.77  | 0.24 | 4.24  | 0.45  | 0.15   |
| 0.73 | 7.98  | 4.03  | 1.24 | 5.40  | 1.61  | 0.54   |
| 1.30 | 8.01  | 4.06  | 1.25 | 4.57  | 0.78  | 0.26   |
| 0.79 | 1.45  | 2.50  | 0.77 | 2.00  | 1.79  | 0.60   |
| 0.47 | 6.44  | 2.49  | 0.77 | 7.21  | 3.42  | 1.15   |
| 0.26 | 7.39  | 3.44  | 1.06 | 7.19  | 3.40  | 1.14   |
| 0.34 | 6.46  | 2.51  | 0.77 | 3.64  | 0.15  | 0.05   |
| 0.20 | 2.94  | 1.01  | 0.31 | 3.51  | 0.28  | 0.09   |
| 0.24 | 5.72  | 1.77  | 0.54 | 5.00  | 1.21  | 0.41   |
| 1.03 | 0.81  | 3.14  | 0.97 | 0.44  | 3.35  | 1.12   |
| 0.64 | 5.01  | 1.06  | 0.33 | 5.73  | 1.94  | 0.65   |
| 0.98 | 1.42  | 2.53  | 0.78 | 3.77  | 0.02  | 0.01   |
| 0.13 | 5.72  | 1.77  | 0.55 | 12.09 | 8.30  | 2.79   |
| 0.19 | 5.22  | 1.27  | 0.39 | 4.58  | 0.79  | 0.27   |
| 3.53 | 14.91 | 10.96 | 3.37 | 18.54 | 14.75 | 4.95 y |
| 1.65 | 9.13  | 5.18  | 1.59 | 7.29  | 3.50  | 1.17   |
| 1.22 | 5.86  | 1.91  | 0.59 | 9.71  | 5.92  | 1.99   |
| 0.70 | 3.95  | 0.00  | 0.00 | 1.37  | 2.42  | 0.81   |
| 2.83 | 13.36 | 9.41  | 2.89 | 9.77  | 5.98  | 2.01 y |
| 0.04 | 6.12  | 2.17  | 0.67 | 6.76  | 2.97  | 1.00   |
| 0.58 | 2.84  | 1.11  | 0.34 | 2.29  | 1.50  | 0.50   |
| 0.18 | 9.49  | 5.54  | 1.70 | 2.27  | 1.52  | 0.51   |
| 0.55 | 5.52  | 1.57  | 0.48 | 3.15  | 0.64  | 0.21   |
| 0.68 | 5.25  | 1.30  | 0.40 | 5.32  | 1.53  | 0.51   |
| 0.85 | 2.00  | 1.95  | 0.60 | 5.11  | 1.32  | 0.44   |
| 0.56 | 6.20  | 2.25  | 0.69 | 11.56 | 7.77  | 2.61   |
| 0.70 | 7.53  | 3.58  | 1.10 | 9.00  | 5.21  | 1.75   |
| 0.74 | 1.40  | 2.55  | 0.78 | 0.99  | 2.80  | 0.94   |
| 0.67 | 1.77  | 2.18  | 0.67 | 2.65  | 1.14  | 0.38   |
| 0.43 | 3.17  | 0.78  | 0.24 | 4.13  | 0.34  | 0.11   |
| 0.61 | 2.02  | 1.93  | 0.59 | 4.35  | 0.56  | 0.19   |
| 0.00 | 4.09  | 0.14  | 0.04 | 5.28  | 1.49  | 0.50   |
| 1.30 | 19.05 | 15.10 | 4.64 | 14.05 | 10.26 | 3.44 y |
| 0.48 | 6.86  | 2.91  | 0.89 | 4.66  | 0.87  | 0.29   |
| 0.19 | 4.86  | 0.91  | 0.28 | 2.19  | 1.60  | 0.54   |
| 0.31 | 5.28  | 1.33  | 0.41 | 1.78  | 2.01  | 0.67   |
| 1.20 | 11.25 | 7.30  | 2.25 | 6.57  | 2.78  | 0.93   |
| 1.90 | 11.19 | 7.24  | 2.23 | 4.20  | 0.41  | 0.14   |
| 5.04 | 25.36 | 21.41 | 6.59 | 14.75 | 10.96 | 3.68 y |
| 1.12 | 17.36 | 13.41 | 4.13 | 10.33 | 6.54  | 2.19 y |
| 0.28 | 1.86  | 2.09  | 0.64 | 1.65  | 2.14  | 0.72   |
| 3.61 | 22.50 | 18.55 | 5.71 | 8.77  | 4.98  | 1.67 y |
| 2.23 | 16.38 | 12.43 | 3.82 | 10.77 | 6.98  | 2.34 y |
| 0.11 | 5.45  | 1.50  | 0.46 | 1.12  | 2.67  | 0.90   |
| 0.62 | 4.36  | 0.41  | 0.13 | 1.05  | 2.74  | 0.92   |
| 0.06 | 7.94  | 3.99  | 1.23 | 2.05  | 1.74  | 0.58   |

|      |              |              |      |              |              |        |
|------|--------------|--------------|------|--------------|--------------|--------|
| 0.46 | 6.66         | 2.71         | 0.83 | 1.81         | 1.98         | 0.67   |
| 2.68 | <u>15.11</u> | <b>11.16</b> | 3.43 | <u>11.08</u> | <b>7.29</b>  | 2.45 y |
| 0.14 | 5.20         | 1.25         | 0.38 | 1.51         | 2.28         | 0.76   |
| 1.02 | 1.15         | 2.80         | 0.86 | 0.34         | 3.45         | 1.16   |
| 0.45 | 2.72         | 1.23         | 0.38 | 0.49         | 3.30         | 1.11   |
| 0.93 | 2.98         | 0.97         | 0.30 | 1.65         | 2.14         | 0.72   |
| 0.75 | 0.89         | 3.06         | 0.94 | 1.72         | 2.07         | 0.69   |
| 0.74 | 0.81         | 3.14         | 0.97 | 3.45         | 0.34         | 0.11   |
| 4.35 | <u>20.90</u> | <b>16.95</b> | 5.22 | <u>19.56</u> | <b>15.77</b> | 5.29 y |
| 2.86 | <u>14.54</u> | <b>10.59</b> | 3.26 | <u>10.25</u> | <b>6.46</b>  | 2.17 y |
| 4.33 | <u>16.84</u> | <b>12.89</b> | 3.97 | <u>10.65</u> | <b>6.86</b>  | 2.30 y |
| 0.61 | 9.88         | 5.93         | 1.83 | 6.79         | 3.00         | 1.01   |
| 0.41 | 3.32         | 0.63         | 0.19 | 4.65         | 0.86         | 0.29   |
| 0.69 | 0.91         | 3.04         | 0.94 | 0.44         | 3.35         | 1.13   |
| 3.72 | <u>16.53</u> | <b>12.58</b> | 3.87 | <u>13.51</u> | <b>9.72</b>  | 3.26 y |
| 0.19 | 2.08         | 1.87         | 0.57 | 2.15         | 1.64         | 0.55   |
| 0.63 | 1.75         | 2.20         | 0.68 | 1.89         | 1.90         | 0.64   |
| 0.77 | 0.98         | 2.97         | 0.91 | 1.22         | 2.57         | 0.86   |
| 1.05 | 5.52         | 1.57         | 0.48 | 9.56         | 5.77         | 1.94   |
| 0.72 | 3.09         | 0.86         | 0.26 | 2.39         | 1.40         | 0.47   |
| 0.57 | 2.23         | 1.72         | 0.53 | 2.77         | 1.02         | 0.34   |
| 0.11 | 3.01         | 0.94         | 0.29 | 2.47         | 1.32         | 0.44   |
| 2.75 | <u>10.52</u> | <b>6.57</b>  | 2.02 | <u>11.33</u> | <b>7.54</b>  | 2.53 y |
| 1.57 | 6.20         | 2.25         | 0.69 | 5.79         | 2.00         | 0.67   |
| 1.14 | 2.50         | 1.45         | 0.45 | 2.96         | 0.83         | 0.28   |
| 0.25 | 0.83         | 3.12         | 0.96 | 1.41         | 2.38         | 0.80   |
| 0.20 | 1.53         | 2.42         | 0.74 | 1.80         | 1.99         | 0.67   |
| 0.58 | 1.56         | 2.39         | 0.73 | 3.59         | 0.20         | 0.07   |
| 0.13 | 4.32         | 0.37         | 0.11 | 3.99         | 0.20         | 0.07   |
| 1.24 | 2.78         | 1.17         | 0.36 | 2.79         | 1.00         | 0.34   |
| 0.26 | 8.45         | 4.50         | 1.38 | 1.83         | 1.96         | 0.66   |
| 0.80 | 1.17         | 2.78         | 0.85 | 2.76         | 1.03         | 0.35   |
| 0.57 | 2.97         | 0.98         | 0.30 | 1.31         | 2.48         | 0.83   |
| 0.01 | 3.45         | 0.50         | 0.16 | 2.29         | 1.50         | 0.50   |
| 0.27 | 4.93         | 0.98         | 0.30 | 8.32         | 4.53         | 1.52   |
| 0.47 | 1.60         | 2.35         | 0.72 | 1.57         | 2.22         | 0.75   |
| 1.23 | 4.26         | 0.31         | 0.09 | 2.72         | 1.07         | 0.36   |
| 1.46 | 7.00         | 3.05         | 0.94 | 10.65        | <b>6.86</b>  | 2.30   |
| 0.29 | 2.15         | 1.80         | 0.55 | 6.48         | 2.69         | 0.90   |
| 2.87 | 8.45         | 4.50         | 1.38 | 5.75         | 1.96         | 0.66   |
| 0.64 | 2.03         | 1.92         | 0.59 | 3.44         | 0.35         | 0.12   |
| 1.15 | 7.92         | 3.97         | 1.22 | 7.94         | 4.15         | 1.39   |
| 0.03 | 1.23         | 2.72         | 0.84 | 1.37         | 2.42         | 0.81   |
| 2.59 | <u>5.06</u>  | <b>1.11</b>  | 0.34 | <u>12.32</u> | <b>8.53</b>  | 2.86 y |
| 0.52 | 1.38         | 2.57         | 0.79 | 1.76         | 2.03         | 0.68   |
| 0.42 | 1.24         | 2.71         | 0.83 | 0.91         | 2.88         | 0.97   |
| 0.87 | 4.60         | 0.65         | 0.20 | 2.93         | 0.86         | 0.29   |

|       |       |       |      |         |       |        |
|-------|-------|-------|------|---------|-------|--------|
| 0.64  | 1.51  | 2.44  | 0.75 | 0.56    | 3.23  | 1.08   |
| 0.77  | 3.12  | 0.83  | 0.25 | 1.78    | 2.01  | 0.68   |
| 1.26  | 8.89  | 4.94  | 1.52 | 12.05   | 8.26  | 2.77   |
| 0.67  | 2.29  | 1.66  | 0.51 | 1.78    | 2.01  | 0.67   |
| 0.88  | 2.14  | 1.81  | 0.56 | 1.38    | 2.41  | 0.81   |
| 0.75  | 2.20  | 1.75  | 0.54 | 2.98    | 0.81  | 0.27   |
| 0.00  | 5.06  | 1.11  | 0.34 | 4.38    | 0.59  | 0.20   |
| 0.45  | 4.53  | 0.58  | 0.18 | 3.59    | 0.20  | 0.07   |
| 0.17  | 3.92  | 0.03  | 0.01 | 1.60    | 2.19  | 0.74   |
| 0.55  | 2.10  | 1.85  | 0.57 | 2.79    | 1.00  | 0.34   |
| 0.31  | 3.41  | 0.54  | 0.17 | 3.31    | 0.48  | 0.16   |
| 0.34  | 3.59  | 0.36  | 0.11 | 3.14    | 0.65  | 0.22   |
| 1.00  | 3.70  | 0.25  | 0.08 | 2.78    | 1.01  | 0.34   |
| 0.31  | 3.53  | 0.42  | 0.13 | 6.18    | 2.39  | 0.80   |
| 2.67  | 16.19 | 12.24 | 3.77 | 5.61    | 1.82  | 0.61 y |
| 0.12  | 4.84  | 0.89  | 0.27 | 4.04    | 0.25  | 0.08   |
| 0.11  | 8.56  | 4.61  | 1.42 | 6.34    | 2.55  | 0.85   |
| 0.60  | 4.17  | 0.22  | 0.07 | 1.51    | 2.28  | 0.77   |
| 0.80  | 12.77 | 8.82  | 2.71 | 7.14    | 3.35  | 1.12   |
| 0.50  | 3.94  | 0.01  | 0.00 | 2.23    | 1.56  | 0.52   |
| 0.88  | 1.90  | 2.05  | 0.63 | 0.80    | 2.99  | 1.00   |
| 0.10  | 3.34  | 0.61  | 0.19 | 2.10    | 1.69  | 0.57   |
| 0.19  | 5.24  | 1.29  | 0.40 | 0.60    | 3.19  | 1.07   |
| 0.53  | 6.50  | 2.55  | 0.79 | 1.78    | 2.01  | 0.67   |
| 0.90  | 3.69  | 0.26  | 0.08 | 3.58    | 0.21  | 0.07   |
| 1.14  | 2.57  | 1.38  | 0.43 | 2.08    | 1.71  | 0.57   |
| 0.51  | 1.00  | 2.95  | 0.91 | 1.02    | 2.77  | 0.93   |
| 2.48  | 12.58 | 8.63  | 2.65 | 3.92    | 0.13  | 0.04 y |
| 0.58  | 10.30 | 6.35  | 1.95 | 4.21    | 0.42  | 0.14   |
| 1.10  | 12.73 | 8.78  | 2.70 | 8.36    | 4.57  | 1.53   |
| 1.42  | 12.36 | 8.41  | 2.59 | 5.04    | 1.25  | 0.42   |
| 0.82  | 1.89  | 2.06  | 0.63 | 1.96    | 1.83  | 0.62   |
| 1.01  | 1.30  | 2.65  | 0.82 | 3.40    | 0.39  | 0.13   |
| 3.95  | 26.27 | 22.32 | 6.87 | 15.33   | 11.54 | 3.87 y |
| 0.01  | 6.31  | 2.36  | 0.73 | 2.15    | 1.64  | 0.55   |
| 0.05  | 4.61  | 0.66  | 0.20 | 3.48    | 0.31  | 0.10   |
| 0.92  | 7.29  | 3.34  | 1.03 | 7.71    | 3.92  | 1.32   |
| 0.91  | 2.82  | 1.13  | 0.35 | 1.17    | 2.62  | 0.88   |
| 0.34  | 3.38  | 0.57  | 0.17 | 1.60    | 2.19  | 0.74   |
|       | 3.95  | 2.19  |      | 3.79    | 2.01  |        |
|       |       | 6.58  |      |         | 6.04  |        |
|       |       | 3.25  |      |         | 2.98  |        |
|       |       | 55.32 |      | 3411.00 | 42.83 |        |
| 62.18 |       | 64.44 |      |         |       |        |
| 68.48 |       | 63.57 |      |         |       |        |
| 63.79 |       | 57.35 |      |         |       |        |
| 64.81 |       | 60.17 |      |         |       |        |

|       |       |
|-------|-------|
| 3.28  | 4.52  |
| 20.20 | 21.77 |
| 16.69 | 36.07 |
| 6.43  | 15.76 |
| 23.16 | 25.21 |
| 15.65 | 27.99 |
| 16.43 | 25.36 |
| 6.89  | 8.38  |
| 9.83  | 13.57 |
| 20.67 | 25.14 |
| 30.49 | 38.70 |
| 48.39 | 34.81 |
| 0.63  | 1.11  |
| 0.37  | -0.11 |

|      |      |
|------|------|
| 5.63 | 3.87 |
| 6.02 | 4.35 |

|       |       |
|-------|-------|
| 1.37  | 1.35  |
| 3.15  | 2.01  |
| 24.29 | 37.21 |
| 34.93 | 25.94 |

|                     |                             |               |              | <u>% inf</u> | <u>abs dev</u> |
|---------------------|-----------------------------|---------------|--------------|--------------|----------------|
| 50008.00 A02        | M-011223- Kruppel-lik       | 687.00        | KLF9         | 1.45         | 6.63           |
| 50008.00 A04        | M-017422- BRF1 homc         | 2972.00       | BRF1         | 1.22         | 6.86           |
| 50008.00 A05        | M-009298- tenascin C        | 3371.00       | TNC          | 1.88         | 6.20           |
| 50008.00 A06        | M-006377- bromodom          | 10902.00      | BRD8         | 3.07         | 5.01           |
| 50008.00 A07        | M-012379- tumor necr        | 7130.00       | TNFAIP6      | 1.80         | 6.28           |
| 50008.00 A08        | M-003462- breast canc       | 675.00        | BRCA2        | 2.89         | 5.19           |
| 50008.00 A09        | M-016358- TNFAIP3 in        | 10318.00      | TNIP1        | 1.13         | 6.95           |
| 50008.00 A10        | M-011595- basonuclin        | 646.00        | BNC1         | 3.06         | 5.02           |
| 50008.00 A11        | M-012656- troponin C        | 7134.00       | TNNC1        | 1.22         | 6.86           |
| 50008.00 A12        | M-010318- basic helix-      | 8553.00       | BHLHB2       | 1.68         | 6.40           |
| 50008.00 A13        | M-015960- troponin I t      | 7135.00       | TNNI1        | 9.75         | 1.67           |
| 50008.00 A14        | M-011591- B-cell CLL/I      | 604.00        | BCL6         | 4.54         | 3.54           |
| 50008.00 A15        | M-008106- tenascin XE       | 7148.00       | TNXB         | 4.54         | 3.54           |
| 50008.00 A16        | M-006901- bromodom          | 9031.00       | BAZ1B        | 6.68         | 1.40           |
| 50008.00 A17        | M-006417- heat shock        | 7184.00       | HSP90B1      | 3.51         | 4.57           |
| 50008.00 A18        | M-008563- basic leucir      | 10538.00      | BATF         | 4.15         | 3.93           |
| 50008.00 A19        | M-012685- thyroid hor       | 9322.00       | TRIP10       | 2.05         | 6.03           |
| 50008.00 A20        | M-013087- BarH-like h       | 56033.00      | BARX1        | 3.05         | 5.03           |
| 50008.00 A21        | M-019053- trophinin         | 7216.00       | TRO          | 2.49         | 5.59           |
| 50008.00 A23        | M-019980- trophinin a       | 10024.00      | TROAP        | 5.19         | 2.89           |
| 50008.00 B02        | M-017537- homeobox          | 3213.00       | HOXB3        | 3.52         | 4.56           |
| 50008.00 B04        | M-011695- homeobox          | 3212.00       | HOXB2        | 8.75         | 0.67           |
| 50008.00 B05        | M-020734- BCL2-assoc        | 9774.00       | BCLAF1       | 10.63        | 2.55           |
| 50008.00 B06        | M-012226- homeobox          | 10481.00      | HOXB13       | 3.90         | 4.18           |
| 50008.00 B07        | M-011224- basic transi      | 690.00        | BTF3L1       | 11.12        | 3.04           |
| 50008.00 B08        | M-011694- homeobox          | 3211.00       | HOXB1        | 8.79         | 0.71           |
| 50008.00 B09        | M-011598- B-cell trans      | 694.00        | BTG1         | 5.64         | 2.44           |
| 50008.00 B10        | M-006337- homeobox          | 3205.00       | HOXA9        | 4.15         | 3.93           |
| 50008.00 B11        | M-012308- BTG family,       | 7832.00       | BTG2         | 7.67         | 0.41           |
| 50008.00 B12        | M-017573- homeobox          | 3204.00       | HOXA7        | 7.73         | 0.35           |
| 50008.00 B13        | M-008197- calreticulin      | 811.00        | CALR         | 5.85         | 2.23           |
| 50008.00 B14        | M-017574- homeobox          | 3202.00       | HOXA5        | 5.79         | 2.29           |
| 50008.00 B15        | M-012333- cartilage pa      | 8092.00       | CART1        | 4.32         | 3.76           |
| 50008.00 B16        | M-011693- homeobox          | 3201.00       | HOXA4        | 13.15        | 5.07           |
| 50008.00 B17        | M-011824- runt-relate       | 862.00        | RUNX1T1      | 7.21         | 0.87           |
| 50008.00 B18        | M-021416- homeobox          | 3199.00       | HOXA2        | 3.76         | 4.32           |
| 50008.00 B19        | M-010557- core-bindir       | 9139.00       | CBFA2T2      | 10.02        | 1.94           |
| 50008.00 B20        | M-011052- homeobox          | 3209.00       | HOXA13       | 5.41         | 2.67           |
| 50008.00 B21        | M-017195- core-bindir       | 863.00        | CBFA2T3      | 8.90         | 0.82           |
| 50008.00 B23        | M-011602- core-bindir       | 865.00        | CBFB         | 2.96         | 5.12           |
| 50008.00 C02        | M-011216- bagpipe ho        | 579.00        | BAPX1        | 9.57         | 1.49           |
| <b>50008.00 C04</b> | <b>M-007750- BTB and CN</b> | <b>571.00</b> | <b>BACH1</b> | <b>33.42</b> | <b>25.34</b>   |
| 50008.00 C05        | M-020028- Usher synd        | 10083.00      | USH1C        | 9.92         | 1.84           |
| 50008.00 C06        | M-008865- activating t      | 11016.00      | ATF7         | 1.45         | 6.63           |
| 50008.00 C07        | M-013351- vascular ce       | 7412.00       | VCAM1        | 9.12         | 1.04           |
| 50008.00 C08        | M-009917- activating t      | 22926.00      | ATF6         | 8.31         | 0.23           |

|              |                              |                     |              |              |
|--------------|------------------------------|---------------------|--------------|--------------|
| 50008.00 C09 | M-012383- villin 1           | 7429.00 VIL1        | 23.12        | 15.04        |
| 50008.00 C10 | M-008822- activating t       | 22809.00 ATF5       | 8.55         | 0.47         |
| 50008.00 C11 | M-017370- ezrin              | 7430.00 EZR         | 9.39         | 1.31         |
| 50008.00 C12 | M-005125- activating t       | 468.00 ATF4         | 3.49         | 4.59         |
| 50008.00 C13 | M-012384- pre-B lym          | 7441.00 VPREB1      | 5.08         | 3.00         |
| 50008.00 C14 | M-008663- activating t       | 467.00 ATF3         | 24.15        | 16.07        |
| 50008.00 C15 | M-013409- vitronectin        | 7448.00 VTN         | 5.27         | 2.81         |
| 50008.00 C16 | M-010045- activating t       | 466.00 ATF1         | 13.68        | 5.60         |
| 50008.00 C17 | M-009754- von Willebr        | 7450.00 VWF         | 14.08        | 6.00         |
| 50008.00 C18 | M-015412- AT-binding         | 463.00 ATBF1        | 6.51         | 1.57         |
| 50008.00 C19 | M-011557- WAS prote          | 8936.00 WASF1       | 8.69         | 0.61         |
| 50008.00 C20 | M-020460- ash1 (absei        | 55870.00 ASH1L      | 7.74         | 0.34         |
| 50008.00 C21 | M-012301- WAS prote          | 10810.00 WASF3      | 5.86         | 2.22         |
| 50008.00 C23 | M-010975- WAS/WASL           | 7456.00 WIPF1       | 1.87         | 6.21         |
| 50008.00 D02 | M-012108- homeobox           | 3207.00 HOXA11      | 9.08         | 1.00         |
| 50008.00 D04 | M-006336- homeobox           | 3206.00 HOXA10      | 18.56        | 10.48        |
| 50008.00 D05 | M-008356- chromobo           | 8535.00 CBX4        | 10.40        | 2.32         |
| 50008.00 D06 | M-017464- homeobox           | 3198.00 HOXA1       | 2.65         | 5.43         |
| 50008.00 D07 | M-012631- caudal type        | 1044.00 CDX1        | 2.28         | 5.80         |
| 50008.00 D08 | M-020146- high-mobili        | 10362.00 HMG20B     | 12.80        | 4.72         |
| 50008.00 D09 | <b>M-015636- caudal type</b> | <b>1045.00 CDX2</b> | <b>30.40</b> | <b>22.32</b> |
| 50008.00 D10 | M-015454- high-mobili        | 10363.00 HMG20A     | 14.24        | 6.16         |
| 50008.00 D11 | <b>M-010141- caudal type</b> | <b>1046.00 CDX4</b> | <b>18.12</b> | <b>10.04</b> |
| 50008.00 D12 | M-010960- motor neu          | 3110.00 MNX1        | 14.55        | 6.47         |
| 50008.00 D13 | M-006422- CCAAT/enf          | 1050.00 CEBPA       | 0.99         | 7.09         |
| 50008.00 D14 | M-017163- H2.0-like h        | 3142.00 HLX1        | 9.39         | 1.31         |
| 50008.00 D15 | M-006423- CCAAT/enf          | 1051.00 CEBPB       | 5.33         | 2.75         |
| 50008.00 D16 | M-008953- zinc finger        | 3104.00 ZBTB48      | 10.97        | 2.89         |
| 50008.00 D17 | M-009310- checkpoint         | 1112.00 CHES1       | 9.88         | 1.80         |
| 50008.00 D18 | M-014345- human imr          | 59269.00 HIVEP3     | 2.04         | 6.04         |
| 50008.00 D19 | M-016022- Cbp/p300-i         | 4435.00 CITED1      | 3.39         | 4.69         |
| 50008.00 D20 | M-013610- HIR histone        | 7290.00 HIRA        | 4.72         | 3.36         |
| 50008.00 D21 | M-015358- Cbp/p300-i         | 10370.00 CITED2     | 3.07         | 5.01         |
| 50008.00 D23 | M-011008- excision rej       | 1161.00 ERCC8       | 3.45         | 4.63         |
| 50008.00 E02 | <b>M-008307- achaete-sc</b>  | <b>429.00 ASCL1</b> | <b>23.20</b> | <b>15.12</b> |
| 50008.00 E04 | M-017255- aristaless r       | 170302.00 ARX       | 11.34        | 3.26         |
| 50008.00 E05 | M-009253- MLX intera         | 51085.00 MLXIPL     | 3.34         | 4.74         |
| 50008.00 E06 | M-013992- aristaless-li      | 60529.00 ALX4       | 8.58         | 0.50         |
| 50008.00 E07 | M-017558- zinc finger,       | 64393.00 ZMAT3      | 13.53        | 5.45         |
| 50008.00 E08 | M-020156- aristaless-li      | 257.00 ALX3         | 2.02         | 6.06         |
| 50008.00 E09 | M-010555- WNT1 indu          | 8840.00 WISP1       | 6.50         | 1.58         |
| 50008.00 E10 | <b>M-012305- TFIIA-alpha</b> | <b>11036.00 ALF</b> | <b>24.80</b> | <b>16.72</b> |
| 50008.00 E11 | M-010554- WNT1 indu          | 8839.00 WISP2       | 4.06         | 4.02         |
| 50008.00 E12 | M-020276- AF4/FMR2           | 27125.00 AFF4       | 10.10        | 2.02         |
| 50008.00 E13 | M-005067- xeroderma          | 7507.00 XPA         | 5.38         | 2.70         |
| 50008.00 E14 | M-013683- activator o        | 29777.00 ABT1       | 2.79         | 5.29         |
| 50008.00 E15 | M-009394- X-ray repai        | 7515.00 XRCC1       | 6.02         | 2.06         |

|                     |                             |                        |              |              |
|---------------------|-----------------------------|------------------------|--------------|--------------|
| 50008.00 E16        | M-004373- apoptosis a       | 26574.00 AATF          | 1.98         | 6.10         |
| 50008.00 E17        | M-012200- Yes-associ        | 10413.00 YAP1          | 8.24         | 0.16         |
| 50008.00 E18        | M-006914- zinc finger       | 9839.00 ZEB2           | 10.18        | 2.10         |
| 50008.00 E19        | M-017302- tyrosine 3-i      | 7531.00 YWHAE          | 6.52         | 1.56         |
| 50008.00 E20        | M-003935- vav 1 oncoj       | 7409.00 VAV1           | 1.39         | 6.69         |
| 50008.00 E21        | M-003332- tyrosine 3-i      | 7534.00 YWHAZ          | 5.03         | 3.05         |
| 50008.00 E23        | M-011797- zonadhesin        | 7455.00 ZAN            | 12.60        | 4.52         |
| 50008.00 F02        | M-006532- hypermeth         | 3090.00 HIC1           | 9.02         | 0.94         |
| 50008.00 F04        | M-011756- hematopoi         | 3087.00 HHEX           | 5.22         | 2.86         |
| 50008.00 F05        | M-020319- CCR4-NOT          | 4849.00 CNOT3          | 11.28        | 3.20         |
| 50008.00 F06        | M-008690- hairy/enha        | 26508.00 HEYL          | 18.59        | 10.51        |
| 50008.00 F07        | M-018791- CCR4-NOT          | 9337.00 CNOT8          | 12.42        | 4.34         |
| <b>50008.00 F08</b> | <b>M-008223- hairy/enha</b> | <b>23493.00 HEY2</b>   | <b>28.13</b> | <b>20.05</b> |
| 50008.00 F09        | M-021441- Kruppel-lik       | 1316.00 KLF6           | 11.92        | 3.84         |
| 50008.00 F10        | M-008709- hairy/enha        | 23462.00 HEY1          | 5.28         | 2.80         |
| 50008.00 F11        | M-003619- cAMP resp         | 1385.00 CREB1          | 1.90         | 6.18         |
| 50008.00 F12        | M-019521- HESX home         | 8820.00 HESX1          | 15.22        | 7.14         |
| 50008.00 F13        | M-008436- cAMP resp         | 9586.00 CREB5          | 7.95         | 0.13         |
| 50008.00 F14        | M-019953- host cell fa      | 3054.00 HCFC1          | 3.78         | 4.30         |
| 50008.00 F15        | M-011242- cAMP resp         | 1389.00 CREBL2         | 6.87         | 1.21         |
| 50008.00 F16        | M-020415- host cell fa      | 29915.00 HCFC2         | 4.86         | 3.22         |
| 50008.00 F17        | M-011534- cellular rep      | 8804.00 CREG1          | 5.08         | 3.00         |
| 50008.00 F18        | M-009812- heart and r       | 9421.00 HAND1          | 9.87         | 1.79         |
| 50008.00 F19        | M-009528- cAMP resp         | 1390.00 CREM           | 7.28         | 0.80         |
| 50008.00 F20        | M-020036- general tra       | 9330.00 GTF3C3         | 9.33         | 1.25         |
| 50008.00 F21        | M-011112- cone-rod h        | 1406.00 CRX            | 14.01        | 5.93         |
| 50008.00 F23        | M-015793- cold shock        | 8531.00 CSDA           | 2.20         | 5.88         |
| 50008.00 G02        | M-006434- twist homc        | 7291.00 TWIST1         | 5.72         | 2.36         |
| 50008.00 G03        | M-003290- polo-like ki      | 5347.00 PLK1 SMARTpool | 9.94         | 1.86         |
| 50008.00 G04        | M-004308- pituitary tu      | 9232.00 PTTG1          | 10.61        | 2.53         |
| 50008.00 G05        | M-013938- CREB/ATF t        | 58487.00 CREBZF        | 4.81         | 3.27         |
| 50008.00 G06        | M-004158- glucocortic       | 2909.00 GRLF1          | 6.30         | 1.78         |
| 50008.00 G07        | M-015308- zinc finger       | 7541.00 ZFP161         | 7.90         | 0.18         |
| 50008.00 G08        | M-020653- eukaryotic        | 8892.00 EIF2B2         | 5.64         | 2.44         |
| 50008.00 G09        | M-007017- zinc finger       | 55734.00 ZFP64         | 5.09         | 2.99         |
| 50008.00 G10        | M-006444- Wiskott-Alr       | 8976.00 WASL           | 10.53        | 2.45         |
| 50008.00 G11        | M-012405- zinc finger       | 23414.00 ZFPM2         | 3.44         | 4.64         |
| 50008.00 G12        | M-005199- vav 2 oncoj       | 7410.00 VAV2           | 8.96         | 0.88         |
| 50008.00 G13        | M-017505- Zic family n      | 7546.00 ZIC2           | 12.37        | 4.29         |
| 50008.00 G14        | M-003029- tuberous sc       | 7249.00 TSC2           | 8.64         | 0.56         |
| 50008.00 G15        | M-011799- Zic family n      | 7547.00 ZIC3           | 4.04         | 4.04         |
| 50008.00 G16        | M-013804- CDC42 sma         | 56882.00 CDC42SE1      | 10.49        | 2.41         |
| 50008.00 G17        | M-006574- zinc finger       | 7556.00 ZNF10          | 14.81        | 6.73         |
| 50008.00 G18        | M-005194- son of seve       | 6654.00 SOS1           | 2.36         | 5.72         |
| 50008.00 G19        | M-019770- zinc finger       | 7678.00 ZNF124         | 10.89        | 2.81         |
| 50008.00 G20        | M-017524- signal-indu       | 6494.00 SIPA1          | 8.97         | 0.89         |
| 50008.00 G21        | M-019625- zinc finger       | 7705.00 ZNF146         | 15.95        | 7.87         |

|              |                         |                           |       |       |
|--------------|-------------------------|---------------------------|-------|-------|
| 50008.00 G23 | M-012659- zinc finger   | 7709.00 ZBTB17            | 14.98 | 6.90  |
| 50008.00 H02 | M-012635- general tra   | 2971.00 GTF3A             | 8.80  | 0.72  |
| 50008.00 H03 | M-003290- polo-like ki  | 5347.00 PLK1 SMARTpool    | 24.35 | 16.27 |
| 50008.00 H04 | M-013262- GTF2I repe    | 9569.00 GTF2IRD1          | 4.82  | 3.26  |
| 50008.00 H05 | M-017332- Kv channel    | 30818.00 KCNIP3           | 21.16 | 13.08 |
| 50008.00 H06 | M-013638- general tra   | 2969.00 GTF2I             | 11.02 | 2.94  |
| 50008.00 H07 | M-020165- CCCTC-binc    | 10664.00 CTCF             | 6.96  | 1.12  |
| 50008.00 H08 | M-010922- general tra   | 2958.00 GTF2A2            | 13.18 | 5.10  |
| 50008.00 H09 | M-011635- cut-like 1, C | 1523.00 CUTL1             | 15.16 | 7.08  |
| 50008.00 H10 | M-010910- general tra   | 2957.00 GTF2A1            | 3.15  | 4.93  |
| 50008.00 H11 | M-017689- D site of al  | 1628.00 DBP               | 22.42 | 14.34 |
| 50008.00 H12 | M-012044- goosecoid-    | 2928.00 GSCL              | 2.22  | 5.86  |
| 50008.00 H13 | M-004819- DNA-dama      | 1649.00 DDIT3             | 8.36  | 0.28  |
| 50008.00 H14 | M-012284- glucocortic   | 10691.00 GMEB1            | 4.14  | 3.94  |
| 50008.00 H15 | M-003881- DEK oncogi    | 7913.00 DEK               | 8.60  | 0.52  |
| 50008.00 H16 | M-011043- GLI-Kruppe    | 2737.00 GLI3              | 4.10  | 3.98  |
| 50008.00 H17 | M-011846- distal-less t | 1746.00 DLX2              | 4.96  | 3.12  |
| 50008.00 H18 | M-006468- GLI-Kruppe    | 2736.00 GLI2              | 16.50 | 8.42  |
| 50008.00 H19 | M-012030- distal-less t | 1747.00 DLX3              | 7.59  | 0.49  |
| 50008.00 H20 | M-003896- glioma-ass    | 2735.00 GLI1              | 26.76 | 18.68 |
| 50008.00 H21 | M-011640- distal-less l | 1748.00 DLX4              | 21.45 | 13.37 |
| 50008.00 H23 | M-012031- distal-less t | 1749.00 DLX5              | 8.81  | 0.73  |
| 50008.00 I02 | M-019714- secretogra    | 6447.00 SCG5              | 35.89 | 27.81 |
| 50008.00 I04 | M-005180- stratifin     | 2810.00 SFN               | 8.51  | 0.43  |
| 50008.00 I05 | M-013706- zinc finger   | 90338.00 ZNF160           | 18.31 | 10.23 |
| 50008.00 I06 | M-019586- SET translo   | 6418.00 SET               | 6.39  | 1.69  |
| 50008.00 I07 | M-021348- zinc finger,  | 7750.00 ZMYM2             | 31.17 | 23.09 |
| 50008.00 I08 | M-011230- serpin pept   | 871.00 SERPINH1           | 17.50 | 9.42  |
| 50008.00 I09 | M-021469- zinc finger   | 7752.00 ZNF200            | 37.98 | 29.90 |
| 50008.00 I10 | M-012564- serpin pept   | 5345.00 SERPINF2          | 4.99  | 3.09  |
| 50008.00 I11 | M-012774- zinc finger   | 7570.00 ZNF22             | 13.16 | 5.08  |
| 50008.00 I12 | M-012737- serpin pept   | 5270.00 SERPINE2          | 13.00 | 4.92  |
| 50008.00 I13 | M-015360- zinc finger   | 10472.00 ZNF238           | 26.62 | 18.54 |
| 50008.00 I14 | M-009540- serpin pept   | 3053.00 SERPIND1          | 11.84 | 3.76  |
| 50008.00 I15 | M-013539- POZ (BTB) ;   | 23598.00 PATZ1            | 15.39 | 7.31  |
| 50008.00 I16 | M-012535- serpin pept   | 462.00 SERPINC1           | 21.04 | 12.96 |
| 50008.00 I17 | M-020972- zinc finger   | 51711.00 ZNF325~withdrawn | 17.69 | 9.61  |
| 50008.00 I18 | M-015400- serpin pept   | 5272.00 SERPINB9          | 10.13 | 2.05  |
| 50008.00 I19 | M-014928- zinc finger   | 84671.00 ZNF347           | 13.70 | 5.62  |
| 50008.00 I20 | M-017707- serpin pept   | 5269.00 SERPINB6          | 11.36 | 3.28  |
| 50008.00 I21 | M-017515- zinc finger   | ##### ZNF384              | 22.04 | 13.96 |
| 50008.00 I23 | M-019775- zinc finger   | 7594.00 ZNF43             | 16.78 | 8.70  |
| 50008.00 J02 | M-019828- growth faci   | 8328.00 GF11B             | 7.59  | 0.49  |
| 50008.00 J04 | M-019947- growth faci   | 2672.00 GF11              | 6.02  | 2.06  |
| 50008.00 J05 | M-028911- distal-less t | 1750.00 DLX6              | 12.75 | 4.67  |
| 50008.00 J06 | M-011491- glial cells n | 8521.00 GCM1              | 19.97 | 11.89 |
| 50008.00 J07 | M-012668- doublesex     | 1761.00 DMRT1             | 21.97 | 13.89 |



|              |                                  |                 |               |              |              |
|--------------|----------------------------------|-----------------|---------------|--------------|--------------|
| 50008.00 J08 | M-020172- gastrulation           | 2637.00         | GBX2          | 19.56        | 11.48        |
| 50008.00 J09 | M-015339- doublesex              | 10655.00        | DMRT2         | 16.64        | 8.56         |
| 50008.00 J10 | M-010324- GATA binding           | 140628.00       | GATA5         | 10.76        | 2.68         |
| 50008.00 J11 | M-031988- doublesex              | 58524.00        | DMRT3         | 1.81         | 6.27         |
| 50008.00 J12 | M-008244- GATA binding           | 2626.00         | GATA4         | 4.97         | 3.11         |
| 50008.00 J13 | M-003866- cyclin D binding       | 9988.00         | DMTF1         | 3.43         | 4.65         |
| 50008.00 J14 | M-003781- GATA binding           | 2625.00         | GATA3         | 9.23         | 1.15         |
| 50008.00 J15 | <b>M-009908- down-regulation</b> | <b>1810.00</b>  | <b>DR1</b>    | <b>27.12</b> | <b>19.04</b> |
| 50008.00 J16 | M-009024- GATA binding           | 2624.00         | GATA2         | 5.32         | 2.76         |
| 50008.00 J17 | M-012032- AT rich inter          | 1820.00         | ARID3A        | 11.56        | 3.48         |
| 50008.00 J18 | M-009610- GATA binding           | 2623.00         | GATA1         | 12.25        | 4.17         |
| 50008.00 J19 | M-019955- double horn            | 26584.00        | DUX1          | 4.56         | 3.52         |
| 50008.00 J20 | M-011662- GA binding             | 2551.00         | GABPA         | 5.85         | 2.23         |
| 50008.00 J21 | M-019945- double horn            | 26583.00        | DUX2          | 2.82         | 5.26         |
| 50008.00 J23 | M-019906- double horn            | 26582.00        | DUX3          | 1.28         | 6.80         |
| 50008.00 K02 | M-012549- serpin peptid          | 6906.00         | SERPINA7      | 5.08         | 3.00         |
| 50008.00 K04 | M-011603- serpin peptid          | 866.00          | SERPINA6      | 6.95         | 1.13         |
| 50008.00 K05 | M-020998- zinc finger            | 51710.00        | ZNF44         | 15.67        | 7.59         |
| 50008.00 K06 | M-008847- serpin peptid          | 5265.00         | SERPINA1      | 5.36         | 2.72         |
| 50008.00 K07 | <b>M-018540- zinc finger</b>     | <b>10773.00</b> | <b>ZBTB6</b>  | <b>29.43</b> | <b>21.35</b> |
| 50008.00 K08 | M-011105- S-antigen; i           | 6295.00         | SAG           | 15.04        | 6.96         |
| 50008.00 K09 | M-031884- zinc finger            | 199692.00       | ZNF627        | 17.38        | 9.30         |
| 50008.00 K10 | M-012259- S100 calcium           | 6285.00         | S100B         | 10.43        | 2.35         |
| 50008.00 K11 | M-006579- zinc finger            | 7625.00         | ZNF74         | 16.48        | 8.40         |
| 50008.00 K12 | M-019891- Ras and Ra             | 9610.00         | RIN1          | 4.60         | 3.48         |
| 50008.00 K13 | M-015952- zinc finger            | 7629.00         | ZNF76         | 13.87        | 5.79         |
| 50008.00 K14 | M-009290- replication            | 5981.00         | RFC1          | 12.46        | 4.38         |
| 50008.00 K15 | M-019777- zinc finger            | 7637.00         | ZNF84         | 14.83        | 6.75         |
| 50008.00 K16 | M-013425- RAS guanylin           | 115727.00       | RASGRP4       | 2.54         | 5.54         |
| 50008.00 K17 | M-019982- zinc finger            | 10009.00        | ZBTB33        | 5.15         | 2.93         |
| 50008.00 K18 | M-009365- RAS guanylin           | 10235.00        | RASGRP2       | 6.25         | 1.83         |
| 50008.00 K19 | <b>M-019092- IKAROS family</b>   | <b>10320.00</b> | <b>IKZF1</b>  | <b>23.32</b> | <b>15.24</b> |
| 50008.00 K20 | M-008928- RAS guanylin           | 10125.00        | RASGRP1       | 4.07         | 4.01         |
| 50008.00 K21 | M-006946- IKAROS family          | 22807.00        | IKZF2         | 1.90         | 6.18         |
| 50008.00 K23 | M-003948- ZW10, kinesin          | 9183.00         | ZW10          | 3.58         | 4.50         |
| 50008.00 L02 | M-009307- forkhead box           | 50943.00        | FOXP3         | 11.82        | 3.74         |
| 50008.00 L04 | M-010359- forkhead box           | 93986.00        | FOXP2         | 7.42         | 0.66         |
| 50008.00 L05 | M-003259- E2F transcription      | 1869.00         | E2F1          | 2.83         | 5.25         |
| 50008.00 L06 | M-004256- forkhead box           | 27086.00        | FOXP1         | 16.70        | 8.62         |
| 50008.00 L07 | M-011847- E4F transcription      | 1877.00         | E4F1          | 2.33         | 5.75         |
| 50008.00 L08 | M-003007- forkhead box           | 2309.00         | FOXO3A        | 10.62        | 2.54         |
| 50008.00 L09 | M-009697- endothelial            | 8721.00         | EDF1          | 2.54         | 5.54         |
| 50008.00 L10 | <b>M-003006- forkhead box</b>    | <b>2308.00</b>  | <b>FOXO1A</b> | <b>24.67</b> | <b>16.59</b> |
| 50008.00 L11 | M-006526- early growth           | 1958.00         | EGR1          | 11.71        | 3.63         |
| 50008.00 L12 | M-009733- forkhead box           | 8456.00         | FOXN1         | 11.19        | 3.11         |
| 50008.00 L13 | M-006528- early growth           | 1960.00         | EGR3          | 5.04         | 3.04         |
| 50008.00 L14 | M-009762- forkhead box           | 2305.00         | FOXM1         | 7.64         | 0.44         |

|                     |                              |                        |              |              |
|---------------------|------------------------------|------------------------|--------------|--------------|
| 50008.00 L15        | M-006529- early growl        | 1961.00 EGR4           | 4.99         | 3.09         |
| 50008.00 L16        | M-009075- forkhead b         | 668.00 FOXL2           | 18.77        | 10.69        |
| <b>50008.00 L17</b> | <b>M-012421- ets homolc</b>  | <b>26298.00 EHF</b>    | <b>20.75</b> | <b>12.67</b> |
| 50008.00 L18        | M-008986- forkhead b         | 2300.00 FOXL1          | 5.83         | 2.25         |
| 50008.00 L19        | M-012669- E74-like fac       | 1997.00 ELF1           | 4.41         | 3.67         |
| 50008.00 L20        | M-010314- forkhead b         | 2302.00 FOXJ1          | 7.04         | 1.04         |
| 50008.00 L21        | M-012754- E74-like fac       | 1998.00 ELF2           | 6.83         | 1.25         |
| 50008.00 L23        | M-016080- E74-like fac       | 1999.00 ELF3           | 5.61         | 2.47         |
| 50008.00 M02        | M-009771- RAS proteir        | 8437.00 RASAL1         | 10.96        | 2.88         |
| 50008.00 M04        | M-003694- prosaposin         | 5660.00 PSAP           | 13.58        | 5.50         |
| 50008.00 M05        | M-016734- zyxin              | 7791.00 ZYX            | 5.80         | 2.28         |
| 50008.00 M06        | M-030847- protein kin        | 5575.00 PRKAR1B        | 9.71         | 1.63         |
| 50008.00 M07        | M-010742- annexin A4         | 307.00 ANXA4           | 8.42         | 0.34         |
| 50008.00 M08        | M-017376- protein phc        | 5523.00 PPP2R3A        | 9.29         | 1.21         |
| 50008.00 M09        | M-011209- annexin A5         | 308.00 ANXA5           | 14.51        | 6.43         |
| 50008.00 M10        | M-014932- protein phc        | 84687.00 PPP1R9B       | 9.11         | 1.03         |
| 50008.00 M11        | M-003456- apoptotic p        | 317.00 APAF1           | 16.15        | 8.07         |
| 50008.00 M12        | M-008593- Rap guanin         | 51735.00 RAPGEF6       | 6.78         | 1.30         |
| 50008.00 M13        | M-004179- amyloid be         | 334.00 APLP2           | 5.84         | 2.24         |
| 50008.00 M14        | M-015092- NLR family,        | 91662.00 NLRP12        | 13.00        | 4.92         |
| 50008.00 M15        | M-003731- amyloid be         | 351.00 APP             | 9.67         | 1.59         |
| 50008.00 M16        | M-020202- kininogen 1        | 3827.00 KNG1           | 6.81         | 1.27         |
| 50008.00 M17        | M-016253- Rho GDP di         | 396.00 ARHGDI4         | 5.01         | 3.07         |
| <b>50008.00 M18</b> | <b>M-008365- intersectin</b> | <b>6453.00 ITSN1</b>   | <b>30.54</b> | <b>22.46</b> |
| 50008.00 M19        | M-009883- rho/rac gua        | 9181.00 ARHGEF2        | 6.32         | 1.76         |
| <b>50008.00 M20</b> | <b>M-006457- IQ motif cc</b> | <b>10788.00 IQGAP2</b> | <b>16.18</b> | <b>8.10</b>  |
| 50008.00 M21        | M-008804- ras homolc         | 399.00 RHOH            | 9.09         | 1.01         |
| 50008.00 M23        | M-011585- ADP-ribosy         | 402.00 ARL2            | 2.80         | 5.28         |
| <b>50008.00 N02</b> | <b>M-008802- forkhead b</b>  | <b>2299.00 FOXI1</b>   | <b>23.15</b> | <b>15.07</b> |
| 50008.00 N04        | M-008636- forkhead b         | 8928.00 FOXH1          | 3.97         | 4.11         |
| <b>50008.00 N05</b> | <b>M-020177- E74-like fa</b> | <b>2000.00 ELF4</b>    | <b>48.93</b> | <b>40.85</b> |
| 50008.00 N06        | M-019124- forkhead b         | 2290.00 FOXG1B         | 11.99        | 3.91         |
| 50008.00 N07        | M-011265- E74-like fac       | 2001.00 ELF5           | 19.17        | 11.09        |
| 50008.00 N08        | M-008261- forkhead b         | 2295.00 FOXF2          | 4.17         | 3.91         |
| 50008.00 N09        | M-003885- ELK1, mem          | 2002.00 ELK1           | 3.89         | 4.19         |
| 50008.00 N10        | M-009628- forkhead b         | 2294.00 FOXF1          | 4.16         | 3.92         |
| 50008.00 N11        | M-010320- ELK3, ETS-c        | 2004.00 ELK3           | 11.04        | 2.96         |
| 50008.00 N12        | M-009139- forkhead b         | 2301.00 FOXE3          | 4.75         | 3.33         |
| 50008.00 N13        | M-010315- ELK4, ETS-c        | 2005.00 ELK4           | 1.26         | 6.82         |
| 50008.00 N14        | M-011863- forkhead b         | 2304.00 FOXE1          | 8.43         | 0.35         |
| 50008.00 N15        | M-022717- empty spiri        | 2016.00 EMX1           | 4.43         | 3.65         |
| 50008.00 N16        | M-026142- forkhead b         | 2298.00 FOXD4          | 8.84         | 0.76         |
| 50008.00 N17        | M-017904- empty spiri        | 2018.00 EMX2           | 7.51         | 0.57         |
| 50008.00 N18        | M-009152- forkhead b         | 27022.00 FOXD3         | 1.97         | 6.11         |
| 50008.00 N19        | M-011266- engrailed h        | 2019.00 EN1            | 2.94         | 5.14         |
| 50008.00 N20        | M-009133- forkhead b         | 2306.00 FOXD2          | 2.86         | 5.22         |
| 50008.00 N21        | M-011267- engrailed h        | 2020.00 EN2            | 3.16         | 4.92         |

|              |                              |                                |              |              |
|--------------|------------------------------|--------------------------------|--------------|--------------|
| 50008.00 N23 | M-017483- eomesoder          | 8320.00 EOMES                  | 6.48         | 1.60         |
| 50008.00 O02 | M-004694- IQ motif co        | 8826.00 IQGAP1                 | 7.13         | 0.95         |
| 50008.00 O04 | M-004777- insulin-like       | 3486.00 IGFBP3                 | 16.92        | 8.84         |
| 50008.00 O05 | M-004378- PYD and C/         | 29108.00 PYCARD                | 9.58         | 1.50         |
| 50008.00 O06 | <b>M-005187- heat shock</b>  | <b>3326.00 <u>HSP90AB1</u></b> | <b>35.91</b> | <b>27.83</b> |
| 50008.00 O07 | <b>M-003459- baculoviral</b> | <b>332.00 <u>BIRC5</u></b>     | <b>29.28</b> | <b>21.20</b> |
| 50008.00 O08 | <b>M-005186- heat shock</b>  | <b>3320.00 <u>HSP90AA1</u></b> | <b>32.52</b> | <b>24.44</b> |
| 50008.00 O09 | M-016223- regulator o        | 1104.00 RCC1                   | 12.32        | 4.24         |
| 50008.00 O10 | M-008852- heat shock         | 3316.00 HSPB2                  | 5.81         | 2.27         |
| 50008.00 O11 | M-004133- regulator o        | 1102.00 RCBTB2                 | 16.74        | 8.66         |
| 50008.00 O12 | M-013420- histidine-ri       | 3273.00 HRG                    | 8.08         | 0.00         |
| 50008.00 O13 | M-011544- developme          | 8853.00 DDEF2                  | 12.71        | 4.63         |
| 50008.00 O14 | M-015131- guanylate c        | 2979.00 GUCA1B                 | 6.35         | 1.73         |
| 50008.00 O15 | M-008713- deleted in l       | 10395.00 DLC1                  | 14.20        | 6.12         |
| 50008.00 O16 | <b>M-006840- Rap guanir</b>  | <b>2889.00 <u>RAPGEF1</u></b>  | <b>27.87</b> | <b>19.79</b> |
| 50008.00 O17 | M-008519- FERM, Rho          | 10160.00 FARP1                 | 8.11         | 0.03         |
| 50008.00 O18 | M-008239- Rap guanin         | 9771.00 RAPGEF5                | 11.51        | 3.43         |
| 50008.00 O19 | M-009612- FYVE, RhoG         | 2245.00 FGD1                   | 6.58         | 1.50         |
| 50008.00 O20 | <b>M-011283- glucokinas</b>  | <b>2646.00 <u>GCKR</u></b>     | <b>24.45</b> | <b>16.37</b> |
| 50008.00 O21 | M-012803- RAB GTPas          | 23637.00 RABGAP1               | 6.49         | 1.59         |
| 50008.00 O23 | M-011108- survival of        | 6606.00 SMN1                   | 3.19         | 4.89         |
| 50008.00 P02 | M-011862- forkhead b         | 2297.00 FOXD1                  | 4.14         | 3.94         |
| 50008.00 P04 | M-008987- forkhead b         | 2303.00 FOXC2                  | 2.00         | 6.08         |
| 50008.00 P05 | M-009674- Ets2 repres        | 2077.00 ERF                    | 6.36         | 1.72         |
| 50008.00 P06 | M-009318- forkhead b         | 2296.00 FOXC1                  | 8.49         | 0.41         |
| 50008.00 P07 | M-003887- v-ets eryth        | 2113.00 ETS1                   | 7.10         | 0.98         |
| 50008.00 P08 | M-008906- forkhead b         | 27023.00 FOXB1                 | 2.86         | 5.22         |
| 50008.00 P09 | M-003888- v-ets eryth        | 2114.00 ETS2                   | 6.58         | 1.50         |
| 50008.00 P10 | M-008863- forkhead b         | 3171.00 FOXA3                  | 3.48         | 4.60         |
| 50008.00 P11 | <b>M-010509- ets variant</b> | <b>2117.00 <u>ETV3</u></b>     | <b>28.66</b> | <b>20.58</b> |
| 50008.00 P12 | M-010089- forkhead b         | 3170.00 FOXA2                  | 5.02         | 3.06         |
| 50008.00 P13 | M-004207- ets variant        | 2118.00 ETV4                   | 4.57         | 3.51         |
| 50008.00 P14 | M-010319- forkhead b         | 3169.00 FOXA1                  | 8.58         | 0.50         |
| 50008.00 P15 | M-010510- ets variant        | 2120.00 ETV6                   | 10.78        | 2.70         |
| 50008.00 P16 | M-004110- FOS-like an        | 2355.00 FOSL2                  | 4.96         | 3.12         |
| 50008.00 P17 | M-017938- ets variant        | 51513.00 ETV7                  | 10.99        | 2.91         |
| 50008.00 P18 | M-004341- FOS-like an        | 8061.00 FOSL1                  | 13.09        | 5.01         |
| 50008.00 P19 | M-011652- even-skipp         | 2128.00 EVX1                   | 4.06         | 4.02         |
| 50008.00 P20 | M-003265- v-fos FBJ m        | 2353.00 FOS                    | 3.52         | 4.56         |
| 50008.00 P21 | M-009350- forkhead b         | 55810.00 FOXJ2                 | 4.67         | 3.41         |
| 50008.00 P23 | M-009029- forkhead-li        | 2307.00 FKHL18                 | 4.87         | 3.21         |
|              |                              |                                | mdn          |              |
|              |                              |                                | 3MAD         |              |
|              |                              |                                | MADc         |              |
| 50008.00 C22 |                              |                                | 41.03        |              |
| 50008.00 D22 |                              |                                | 52.91        |              |

|              |                                            |       |
|--------------|--------------------------------------------|-------|
| 50008.00 E22 |                                            | 55.64 |
| 50008.00 F22 |                                            | 46.12 |
|              |                                            | 48.93 |
|              |                                            | 5.73  |
| 50008.00 I03 | D-001206-:siControl non-targeting          | 10.67 |
| 50008.00 J03 | D-001206-:siControl non-targeting siRNA #2 | 7.46  |
|              |                                            | 9.06  |
|              |                                            | 2.27  |

|           |                |
|-----------|----------------|
| 50008 G22 | Human3 Pc RNAi |
| 50008 H22 | Human3 Pc RNAi |
| 50008 I22 | Human3 Pc RNAi |
| 50008 J22 | Human3 Pc RNAi |

|           |                |                                 |
|-----------|----------------|---------------------------------|
| 50008 K03 | Human3 Pc RNAi | D-001600-(siGLO RISC-free siRNA |
| 50008 L03 | Human3 Pc RNAi | D-001600-(siGLO RISC-free siRNA |

| <u>robust Z</u> | <u>% inf</u> | <u>abs dev</u> | <u>robust Z</u> | <u>% inf</u> | <u>abs dev</u> | <u>robust Z</u> |
|-----------------|--------------|----------------|-----------------|--------------|----------------|-----------------|
| -1.143232       | 4.79         | 0.60           | 0.17559         | 2.43         | 3.83           | -0.83           |
| -1.182096       | 1.62         | 2.57           | -0.763308       | 6.51         | 0.25           | 0.05            |
| -1.069075       | 1.18         | 3.01           | -0.89252        | 4.99         | 1.27           | -0.28           |
| -0.863423       | 4.44         | 0.25           | 0.072084        | 5.04         | 1.22           | -0.27           |
| -1.082961       | 1.49         | 2.70           | -0.80086        | 3.69         | 2.57           | -0.56           |
| -0.894679       | 6.33         | 2.14           | 0.633651        | 5.87         | 0.39           | -0.08           |
| -1.198156       | 4.91         | 0.72           | 0.212431        | 7.32         | 1.06           | 0.23            |
| -0.865596       | 1.89         | 2.30           | -0.68148        | 9.32         | 3.06           | 0.66            |
| -1.183459       | 0.57         | 3.62           | -1.074039       | 2.48         | 3.78           | -0.82           |
| -1.10354        | 1.78         | 2.41           | -0.715331       | 3.85         | 2.41           | -0.52           |
| 0.287917        | 6.93         | 2.74           | 0.811403        | 7.35         | 1.09           | 0.24            |
| -0.61092        | 3.57         | 0.62           | -0.183793       | 6.26         | 0.00           | 0.00            |
| -0.610144       | 2.82         | 1.37           | -0.408071       | 4.71         | 1.55           | -0.34           |
| -0.240635       | 2.05         | 2.14           | -0.634599       | 7.01         | 0.75           | 0.16            |
| -0.787248       | 1.17         | 3.02           | -0.89714        | 2.09         | 4.17           | -0.91           |
| -0.677125       | 1.95         | 2.24           | -0.663563       | 3.06         | 3.20           | -0.70           |
| -1.039544       | 0.83         | 3.36           | -0.99679        | 3.27         | 2.99           | -0.65           |
| -0.867683       | 1.18         | 3.01           | -0.892372       | 3.03         | 3.23           | -0.70           |
| -0.964352       | 1.41         | 2.78           | -0.824641       | 4.06         | 2.20           | -0.48           |
| -0.498002       | 1.67         | 2.52           | -0.748204       | 4.62         | 1.64           | -0.36           |
| -0.78535        | 6.25         | 2.06           | 0.607768        | 3.31         | 2.95           | -0.64           |
| 0.115332        | 6.02         | 1.83           | 0.539119        | 3.13         | 3.13           | -0.68           |
| 0.440768        | 5.92         | 1.73           | 0.511014        | 5.53         | 0.73           | -0.16           |
| -0.721163       | 1.29         | 2.90           | -0.859972       | 2.42         | 3.84           | -0.83           |
| 0.525119        | 11.12        | 6.93           | 2.051223        | 8.69         | 2.43           | 0.53            |
| 0.123233        | 8.38         | 4.19           | 1.239612        | 4.22         | 2.04           | -0.44           |
| -0.42062        | 2.48         | 1.71           | -0.506957       | 1.20         | 5.06           | -1.10           |
| -0.67678        | 1.75         | 2.44           | -0.723949       | 3.12         | 3.14           | -0.68           |
| -0.069431       | 2.94         | 1.25           | -0.370963       | 3.82         | 2.44           | -0.53           |
| -0.060581       | 2.88         | 1.31           | -0.388258       | 6.51         | 0.25           | 0.05            |
| -0.383584       | 2.60         | 1.59           | -0.473728       | 4.95         | 1.31           | -0.29           |
| -0.394555       | 2.30         | 1.89           | -0.561686       | 5.36         | 0.90           | -0.20           |
| -0.648697       | 1.87         | 2.32           | -0.688085       | 4.83         | 1.44           | -0.31           |
| 0.875118        | 10.23        | 6.04           | 1.788534        | 10.96        | 4.70           | 1.02            |
| -0.148935       | 2.27         | 1.92           | -0.569504       | 5.35         | 0.91           | -0.20           |
| -0.744019       | 1.42         | 2.77           | -0.822065       | 3.61         | 2.65           | -0.58           |
| 0.335026        | 1.57         | 2.62           | -0.776042       | 7.94         | 1.68           | 0.36            |
| -0.460174       | 3.90         | 0.29           | -0.087958       | 3.33         | 2.93           | -0.64           |
| 0.141742        | 3.98         | 0.21           | -0.062637       | 9.86         | 3.60           | 0.78            |
| -0.883105       | 0.83         | 3.36           | -0.995102       | 2.62         | 3.64           | -0.79           |
| 0.256798        | 3.76         | 0.43           | -0.129834       | 2.77         | 3.49           | -0.76           |
| 4.372003        | 16.52        | 12.33          | 3.651047        | 14.29        | 8.03           | 1.74            |
| 0.318294        | 4.54         | 0.35           | 0.102677        | 2.29         | 3.97           | -0.86           |
| -1.14337        | 1.39         | 2.80           | -0.831186       | 2.41         | 3.85           | -0.84           |
| 0.180537        | 7.49         | 3.30           | 0.975058        | 6.20         | 0.06           | -0.01           |
| 0.03945         | 3.83         | 0.36           | -0.107711       | 3.75         | 2.51           | -0.55           |

|           |              |       |           |              |       |        |
|-----------|--------------|-------|-----------|--------------|-------|--------|
| 2.594753  | 9.21         | 5.02  | 1.485835  | 9.85         | 3.59  | 0.78   |
| 0.080971  | 1.30         | 2.89  | -0.858669 | 3.67         | 2.59  | -0.56  |
| 0.22668   | 4.21         | 0.02  | 0.003465  | 10.10        | 3.84  | 0.83   |
| -0.790473 | 1.26         | 2.93  | -0.86865  | 4.11         | 2.15  | -0.47  |
| -0.51746  | 2.47         | 1.72  | -0.511429 | 4.01         | 2.25  | -0.49  |
| 2.772082  | 10.08        | 5.89  | 1.742334  | 12.83        | 6.57  | 1.43   |
| -0.48384  | 2.77         | 1.42  | -0.422553 | 3.11         | 3.15  | -0.69  |
| 0.96568   | 3.61         | 0.58  | -0.173546 | 9.38         | 3.12  | 0.68   |
| 1.034852  | 3.20         | 0.99  | -0.293963 | 7.17         | 0.91  | 0.20   |
| -0.271047 | 2.51         | 1.68  | -0.499257 | 4.63         | 1.63  | -0.36  |
| 0.106259  | 3.04         | 1.15  | -0.341229 | 2.78         | 3.48  | -0.76  |
| -0.058753 | 2.24         | 1.95  | -0.579218 | 6.74         | 0.48  | 0.10   |
| -0.381877 | 1.64         | 2.55  | -0.755252 | 3.02         | 3.24  | -0.70  |
| -1.070748 | 0.96         | 3.23  | -0.95677  | 1.55         | 4.71  | -1.03  |
| 0.17355   | 5.65         | 1.46  | 0.431023  | 3.16         | 3.10  | -0.67  |
| 1.808334  | 16.74        | 12.55 | 3.715609  | 11.27        | 5.01  | 1.09   |
| 0.400403  | 8.09         | 3.90  | 1.152662  | 9.22         | 2.96  | 0.64   |
| -0.93689  | 3.22         | 0.97  | -0.287329 | 3.29         | 2.97  | -0.65  |
| -1.000266 | 1.89         | 2.30  | -0.681569 | 1.52         | 4.74  | -1.03  |
| 0.814054  | 13.86        | 9.67  | 2.862389  | 10.48        | 4.22  | 0.92   |
| 3.850196  | <u>19.22</u> | 15.03 | 4.448887  | <u>25.68</u> | 19.42 | 4.22 y |
| 1.062796  | 6.39         | 2.20  | 0.651006  | 10.30        | 4.04  | 0.88   |
| 1.73209   | 13.68        | 9.49  | 2.808489  | 18.42        | 12.16 | 2.64 y |
| 1.116616  | 6.00         | 1.81  | 0.535565  | 11.03        | 4.77  | 1.04   |
| -1.223118 | 1.91         | 2.28  | -0.677097 | 2.76         | 3.50  | -0.76  |
| 0.226576  | 2.79         | 1.40  | -0.416955 | 10.56        | 4.30  | 0.93   |
| -0.473784 | 3.25         | 0.94  | -0.279955 | 4.09         | 2.17  | -0.47  |
| 0.499072  | 1.84         | 2.35  | -0.696436 | 6.37         | 0.11  | 0.02   |
| 0.310773  | 5.07         | 0.88  | 0.260083  | 12.40        | 6.14  | 1.33   |
| -1.041493 | 2.92         | 1.27  | -0.378307 | 6.00         | 0.26  | -0.06  |
| -0.809017 | 1.50         | 2.69  | -0.797513 | 8.56         | 2.30  | 0.50   |
| -0.579749 | 2.10         | 2.09  | -0.620058 | 7.05         | 0.79  | 0.17   |
| -0.864303 | 1.06         | 3.13  | -0.928147 | 3.02         | 3.24  | -0.70  |
| -0.797373 | 1.44         | 2.75  | -0.817149 | 5.33         | 0.93  | -0.20  |
| 2.608036  | <u>15.12</u> | 10.93 | 3.235543  | <u>9.22</u>  | 2.96  | 0.64 y |
| 0.563414  | 6.42         | 2.23  | 0.660098  | 5.18         | 1.08  | -0.23  |
| -0.817417 | 3.16         | 1.03  | -0.307793 | 2.70         | 3.56  | -0.77  |
| 0.086887  | 8.31         | 4.12  | 1.217934  | 3.13         | 3.13  | -0.68  |
| 0.941012  | 4.67         | 0.48  | 0.140436  | 5.45         | 0.81  | -0.18  |
| -1.045374 | 1.37         | 2.82  | -0.836132 | 2.18         | 4.08  | -0.89  |
| -0.271926 | 5.23         | 1.04  | 0.306875  | 6.23         | 0.03  | -0.01  |
| 2.885068  | <u>12.04</u> | 7.85  | 2.3225    | <u>11.56</u> | 5.30  | 1.15 y |
| -0.692443 | 1.21         | 2.98  | -0.884701 | 1.57         | 4.69  | -1.02  |
| 0.348481  | 6.35         | 2.16  | 0.638893  | 7.21         | 0.95  | 0.21   |
| -0.465883 | 3.69         | 0.50  | -0.148196 | 4.65         | 1.61  | -0.35  |
| -0.911791 | 2.68         | 1.51  | -0.447815 | 4.29         | 1.97  | -0.43  |
| -0.354501 | 1.55         | 2.64  | -0.781965 | 5.01         | 1.25  | -0.27  |

|           |       |       |           |       |       |        |
|-----------|-------|-------|-----------|-------|-------|--------|
| -1.051998 | 0.42  | 3.77  | -1.119167 | 1.98  | 4.28  | -0.93  |
| 0.028773  | 5.29  | 1.10  | 0.324022  | 7.26  | 1.00  | 0.22   |
| 0.362626  | 6.78  | 2.59  | 0.764788  | 15.55 | 9.29  | 2.02   |
| -0.267752 | 2.84  | 1.35  | -0.40197  | 5.36  | 0.90  | -0.20  |
| -1.15322  | 0.60  | 3.59  | -1.066025 | 2.43  | 3.83  | -0.83  |
| -0.525878 | 2.38  | 1.81  | -0.53829  | 4.62  | 1.64  | -0.36  |
| 0.780589  | 2.81  | 1.38  | -0.410173 | 9.30  | 3.04  | 0.66   |
| 0.163408  | 3.98  | 0.21  | -0.063851 | 4.85  | 1.41  | -0.31  |
| -0.492207 | 2.17  | 2.02  | -0.599001 | 5.33  | 0.93  | -0.20  |
| 0.552719  | 3.20  | 0.99  | -0.295828 | 4.86  | 1.40  | -0.31  |
| 1.813854  | 5.13  | 0.94  | 0.278     | 5.68  | 0.58  | -0.13  |
| 0.748677  | 7.16  | 2.97  | 0.879341  | 4.33  | 1.93  | -0.42  |
| 3.458797  | 25.11 | 20.92 | 6.194419  | 27.77 | 21.51 | 4.67 y |
| 0.663635  | 9.48  | 5.29  | 1.564671  | 11.21 | 4.95  | 1.08   |
| -0.482443 | 5.46  | 1.27  | 0.374931  | 4.94  | 1.32  | -0.29  |
| -1.065004 | 3.86  | 0.33  | -0.098471 | 2.09  | 4.17  | -0.91  |
| 1.2315    | 8.44  | 4.25  | 1.256819  | 12.62 | 6.36  | 1.38   |
| -0.022304 | 2.67  | 1.52  | -0.450835 | 7.63  | 1.37  | 0.30   |
| -0.741156 | 1.70  | 2.49  | -0.73926  | 1.13  | 5.13  | -1.11  |
| -0.207619 | 4.33  | 0.14  | 0.038678  | 5.45  | 0.81  | -0.18  |
| -0.555186 | 1.99  | 2.20  | -0.654234 | 9.20  | 2.94  | 0.64   |
| -0.516494 | 3.62  | 0.57  | -0.169963 | 6.34  | 0.08  | 0.02   |
| 0.309082  | 11.20 | 7.01  | 2.074915  | 14.15 | 7.89  | 1.71   |
| -0.137809 | 2.23  | 1.96  | -0.580729 | 9.83  | 3.57  | 0.78   |
| 0.216434  | 3.30  | 0.89  | -0.264703 | 8.95  | 2.69  | 0.58   |
| 1.024157  | 4.04  | 0.15  | -0.046348 | 14.37 | 8.11  | 1.76   |
| -1.013565 | 0.77  | 3.42  | -1.013848 | 2.84  | 3.42  | -0.74  |
| -0.406923 | 3.17  | 1.02  | -0.30415  | 2.34  | 3.92  | -0.85  |
| 0.322227  | 15.33 | 11.14 | 3.297143  | 3.78  | 2.48  | -0.54  |
| 0.437145  | 5.66  | 1.47  | 0.434636  | 2.32  | 3.94  | -0.86  |
| -0.563914 | 3.95  | 0.24  | -0.071817 | 4.24  | 2.02  | -0.44  |
| -0.307081 | 6.55  | 2.36  | 0.698598  | 3.14  | 3.12  | -0.68  |
| -0.030774 | 9.91  | 5.72  | 1.693735  | 5.28  | 0.98  | -0.21  |
| -0.420741 | 4.39  | 0.20  | 0.05775   | 2.43  | 3.83  | -0.83  |
| -0.515201 | 5.94  | 1.75  | 0.517766  | 10.17 | 3.91  | 0.85   |
| 0.42231   | 8.42  | 4.23  | 1.250718  | 7.70  | 1.44  | 0.31   |
| -0.799926 | 2.54  | 1.65  | -0.491231 | 3.65  | 2.61  | -0.57  |
| 0.151781  | 5.50  | 1.31  | 0.3866    | 13.34 | 7.08  | 1.54   |
| 0.740397  | 9.15  | 4.96  | 1.467355  | 6.56  | 0.30  | 0.06   |
| 0.096789  | 4.62  | 0.43  | 0.127317  | 10.16 | 3.90  | 0.85   |
| -0.695961 | 5.44  | 1.25  | 0.367942  | 6.03  | 0.23  | -0.05  |
| 0.416445  | 5.79  | 1.60  | 0.471803  | 12.35 | 6.09  | 1.32   |
| 1.161638  | 6.49  | 2.30  | 0.680918  | 16.39 | 10.13 | 2.20   |
| -0.986897 | 2.17  | 2.02  | -0.598735 | 7.99  | 1.73  | 0.38   |
| 0.48441   | 3.70  | 0.49  | -0.147544 | 11.95 | 5.69  | 1.24   |
| 0.153213  | 3.01  | 1.18  | -0.350943 | 21.94 | 15.68 | 3.41   |
| 1.358458  | 7.97  | 3.78  | 1.118041  | 25.08 | 18.82 | 4.09   |

|           |       |       |           |       |       |        |
|-----------|-------|-------|-----------|-------|-------|--------|
| 1.190272  | 4.72  | 0.52  | 0.154059  | 18.01 | 11.75 | 2.55   |
| 0.125475  | 11.18 | 6.99  | 2.069584  | 3.04  | 3.22  | -0.70  |
| 2.806754  | 8.82  | 4.63  | 1.370809  | 6.34  | 0.08  | 0.02   |
| -0.562534 | 4.00  | 0.19  | -0.056329 | 2.41  | 3.85  | -0.84  |
| 2.257347  | 13.27 | 9.08  | 2.686177  | 17.51 | 11.25 | 2.44 y |
| 0.508042  | 4.39  | 0.20  | 0.056536  | 4.15  | 2.11  | -0.46  |
| -0.193284 | 1.62  | 2.57  | -0.762567 | 1.17  | 5.09  | -1.11  |
| 0.879603  | 8.49  | 4.30  | 1.270709  | 10.23 | 3.97  | 0.86   |
| 1.222012  | 5.35  | 1.16  | 0.34268   | 12.12 | 5.86  | 1.27   |
| -0.849606 | 2.05  | 2.14  | -0.635488 | 4.02  | 2.24  | -0.49  |
| 2.473487  | 13.45 | 9.26  | 2.739781  | 15.75 | 9.49  | 2.06 y |
| -1.010857 | 5.19  | 1.00  | 0.294821  | 6.27  | 0.01  | 0.00   |
| 0.048041  | 3.72  | 0.47  | -0.139666 | 6.85  | 0.59  | 0.13   |
| -0.679729 | 2.23  | 1.96  | -0.580906 | 3.60  | 2.66  | -0.58  |
| 0.089527  | 3.71  | 0.48  | -0.143901 | 6.45  | 0.19  | 0.04   |
| -0.685681 | 2.39  | 1.80  | -0.535743 | 1.90  | 4.36  | -0.95  |
| -0.53747  | 2.50  | 1.69  | -0.501922 | 4.48  | 1.78  | -0.39  |
| 1.45316   | 3.01  | 1.18  | -0.349995 | 11.65 | 5.39  | 1.17   |
| -0.083265 | 4.23  | 0.04  | 0.00921   | 7.29  | 1.03  | 0.22   |
| 3.222302  | 10.33 | 6.14  | 1.817261  | 38.90 | 32.64 | 7.10 y |
| 2.307371  | 3.79  | 0.40  | -0.119143 | 25.22 | 18.96 | 4.12 y |
| 0.127217  | 2.02  | 2.17  | -0.644579 | 21.27 | 15.01 | 3.26   |
| 4.797556  | 32.41 | 28.22 | 8.355752  | 19.15 | 12.89 | 2.80 y |
| 0.074329  | 6.75  | 2.56  | 0.75617   | 4.79  | 1.47  | -0.32  |
| 1.764864  | 18.07 | 13.88 | 4.10979   | 6.79  | 0.53  | 0.11   |
| -0.290953 | 4.27  | 0.08  | 0.021205  | 4.54  | 1.72  | -0.37  |
| 3.983537  | 19.99 | 15.80 | 4.676925  | 27.37 | 21.11 | 4.59 y |
| 1.624623  | 7.09  | 2.90  | 0.8571    | 11.31 | 5.05  | 1.10   |
| 5.157387  | 22.94 | 18.75 | 5.551765  | 13.80 | 7.54  | 1.64 y |
| -0.533089 | 3.74  | 0.45  | -0.135283 | 4.87  | 1.39  | -0.30  |
| 0.876843  | 3.28  | 0.91  | -0.270803 | 7.04  | 0.78  | 0.17   |
| 0.848553  | 6.94  | 2.75  | 0.812203  | 9.99  | 3.73  | 0.81   |
| 3.198325  | 8.98  | 4.79  | 1.415735  | 22.69 | 16.43 | 3.57 y |
| 0.649145  | 8.37  | 4.18  | 1.235762  | 20.78 | 14.52 | 3.16   |
| 1.260652  | 4.52  | 0.33  | 0.094888  | 12.51 | 6.25  | 1.36   |
| 2.236819  | 8.76  | 4.57  | 1.351796  | 15.51 | 9.25  | 2.01 y |
| 1.658605  | 8.52  | 4.33  | 1.282318  | 22.82 | 16.56 | 3.60   |
| 0.354518  | 11.43 | 7.24  | 2.143327  | 13.59 | 7.33  | 1.59   |
| 0.969992  | 4.69  | 0.50  | 0.145204  | 16.17 | 9.91  | 2.15   |
| 0.565656  | 6.19  | 2.00  | 0.592101  | 9.71  | 3.45  | 0.75   |
| 2.408455  | 7.70  | 3.51  | 1.037309  | 25.67 | 19.41 | 4.22 y |
| 1.501977  | 5.99  | 1.80  | 0.531508  | 25.99 | 19.73 | 4.29   |
| -0.083317 | 2.23  | 1.96  | -0.583187 | 4.64  | 1.62  | -0.35  |
| -0.354725 | 4.10  | 0.09  | -0.026891 | 4.02  | 2.24  | -0.49  |
| 0.806119  | 5.26  | 1.07  | 0.315552  | 4.68  | 1.58  | -0.34  |
| 2.050694  | 12.32 | 8.13  | 2.405423  | 17.25 | 10.99 | 2.39 y |
| 2.397243  | 15.69 | 11.50 | 3.404055  | 17.22 | 10.96 | 2.38 y |



|           |       |       |           |       |       |       |   |
|-----------|-------|-------|-----------|-------|-------|-------|---|
| 1.980659  | 12.48 | 8.29  | 2.454585  | 16.42 | 10.16 | 2.21  | y |
| 1.47731   | 10.18 | 5.99  | 1.771061  | 13.17 | 6.91  | 1.50  |   |
| 0.462157  | 1.45  | 2.74  | -0.813417 | 3.15  | 3.11  | -0.68 |   |
| -1.08165  | 0.90  | 3.29  | -0.976399 | 1.38  | 4.88  | -1.06 |   |
| -0.5354   | 1.08  | 3.11  | -0.922816 | 6.95  | 0.69  | 0.15  |   |
| -0.801323 | 1.16  | 3.03  | -0.898917 | 8.66  | 2.40  | 0.52  |   |
| 0.199373  | 10.09 | 5.90  | 1.744703  | 7.42  | 1.16  | 0.25  |   |
| 3.285091  | 15.70 | 11.51 | 3.406128  | 24.56 | 18.30 | 3.98  | y |
| -0.475578 | 2.53  | 1.66  | -0.492415 | 8.33  | 2.07  | 0.45  |   |
| 0.600501  | 4.19  | 0.00  | 0         | 9.64  | 3.38  | 0.74  |   |
| 0.71987   | 7.02  | 2.83  | 0.835954  | 11.95 | 5.69  | 1.24  |   |
| -0.607056 | 2.50  | 1.69  | -0.500945 | 4.01  | 2.25  | -0.49 |   |
| -0.383429 | 5.81  | 1.62  | 0.478259  | 11.46 | 5.20  | 1.13  |   |
| -0.906737 | 1.39  | 2.80  | -0.831394 | 8.54  | 2.28  | 0.49  |   |
| -1.173023 | 2.78  | 1.41  | -0.41891  | 3.70  | 2.56  | -0.56 |   |
| -0.516581 | 1.63  | 2.56  | -0.759843 | 0.88  | 5.38  | -1.17 |   |
| -0.193854 | 2.21  | 1.98  | -0.588725 | 2.12  | 4.14  | -0.90 |   |
| 1.310331  | 8.38  | 4.19  | 1.238635  | 4.83  | 1.43  | -0.31 |   |
| -0.468505 | 0.89  | 3.30  | -0.977267 | 2.07  | 4.19  | -0.91 |   |
| 3.6827    | 23.24 | 19.05 | 5.641203  | 20.54 | 14.28 | 3.10  | y |
| 1.201657  | 9.58  | 5.39  | 1.594524  | 12.14 | 5.88  | 1.28  |   |
| 1.605476  | 8.20  | 4.01  | 1.186216  | 10.99 | 4.73  | 1.03  |   |
| 0.406268  | 5.17  | 0.98  | 0.290172  | 7.10  | 0.84  | 0.18  |   |
| 1.448847  | 13.13 | 8.94  | 2.645308  | 10.60 | 4.34  | 0.94  |   |
| -0.599828 | 4.23  | 0.04  | 0.010632  | 1.95  | 4.31  | -0.94 |   |
| 1.000007  | 10.16 | 5.97  | 1.766323  | 11.98 | 5.72  | 1.24  |   |
| 0.755922  | 1.88  | 2.31  | -0.685982 | 5.95  | 0.31  | -0.07 |   |
| 1.164053  | 7.19  | 3.00  | 0.885679  | 13.39 | 7.13  | 1.55  |   |
| -0.955071 | 0.38  | 3.81  | -1.130127 | 0.69  | 5.57  | -1.21 |   |
| -0.504074 | 2.95  | 1.24  | -0.368179 | 5.12  | 1.14  | -0.25 |   |
| -0.31512  | 3.54  | 0.65  | -0.194988 | 2.21  | 4.05  | -0.88 |   |
| 2.628563  | 8.95  | 4.76  | 1.408479  | 22.45 | 16.19 | 3.52  | y |
| -0.690424 | 1.42  | 2.77  | -0.821857 | 2.48  | 3.78  | -0.82 |   |
| -1.066091 | 1.12  | 3.07  | -0.910022 | 5.44  | 0.82  | -0.18 |   |
| -0.775949 | 1.12  | 3.07  | -0.909312 | 3.44  | 2.82  | -0.61 |   |
| 0.645523  | 7.97  | 3.78  | 1.116679  | 2.96  | 3.30  | -0.72 |   |
| -0.112624 | 5.73  | 1.54  | 0.454804  | 4.26  | 2.00  | -0.44 |   |
| -0.90584  | 0.85  | 3.34  | -0.991663 | 2.69  | 3.57  | -0.78 |   |
| 1.487659  | 13.70 | 9.51  | 2.814116  | 13.75 | 7.49  | 1.63  |   |
| -0.990468 | 1.75  | 2.44  | -0.723297 | 1.36  | 4.90  | -1.07 |   |
| 0.438353  | 8.04  | 3.85  | 1.137795  | 9.12  | 2.86  | 0.62  |   |
| -0.955278 | 0.65  | 3.54  | -1.048403 | 0.72  | 5.54  | -1.21 |   |
| 2.862471  | 14.27 | 10.08 | 2.98322   | 13.90 | 7.64  | 1.66  | y |
| 0.626893  | 3.37  | 0.82  | -0.244327 | 6.23  | 0.03  | -0.01 |   |
| 0.536332  | 3.76  | 0.43  | -0.127524 | 7.47  | 1.21  | 0.26  |   |
| -0.523894 | 1.29  | 2.90  | -0.85938  | 7.78  | 1.52  | 0.33  |   |
| -0.075934 | 2.24  | 1.95  | -0.579633 | 7.34  | 1.08  | 0.23  |   |

|                 |              |              |                  |              |              |               |
|-----------------|--------------|--------------|------------------|--------------|--------------|---------------|
| -0.533089       | 0.68         | 3.51         | -1.040117        | 1.71         | 4.55         | -0.99         |
| 1.844731        | 8.42         | 4.23         | 1.250837         | 15.15        | 8.89         | 1.93          |
| <b>2.185587</b> | <b>2.95</b>  | <b>1.24</b>  | <b>-0.368653</b> | <b>16.67</b> | <b>10.41</b> | <b>2.26</b> y |
| -0.38719        | 2.18         | 2.01         | -0.596188        | 4.60         | 1.66         | -0.36         |
| -0.632568       | 1.01         | 3.18         | -0.942481        | 6.12         | 0.14         | -0.03         |
| -0.179674       | 1.48         | 2.71         | -0.803644        | 8.26         | 2.00         | 0.44          |
| -0.215606       | 1.52         | 2.67         | -0.790791        | 7.34         | 1.08         | 0.23          |
| -0.42557        | 1.13         | 3.06         | -0.907298        | 4.33         | 1.93         | -0.42         |
| 0.497864        | 8.39         | 4.20         | 1.241419         | 2.81         | 3.45         | -0.75         |
| 0.948947        | 10.80        | 6.61         | 1.955269         | 5.10         | 1.16         | -0.25         |
| -0.393124       | 5.74         | 1.55         | 0.457677         | 4.27         | 1.99         | -0.43         |
| 0.281396        | 5.67         | 1.48         | 0.436709         | 8.81         | 2.55         | 0.55          |
| 0.058874        | 5.52         | 1.33         | 0.391753         | 5.96         | 0.30         | -0.07         |
| 0.209344        | 5.80         | 1.61         | 0.475475         | 16.32        | <b>10.06</b> | <b>2.19</b>   |
| 1.109716        | 23.18        | <b>18.99</b> | <b>5.622546</b>  | 14.20        | 7.94         | 1.72          |
| 0.17826         | 4.90         | 0.71         | 0.208404         | 8.08         | 1.82         | 0.40          |
| 1.392785        | 11.30        | <b>7.11</b>  | <b>2.105419</b>  | 12.38        | 6.12         | 1.33          |
| -0.224386       | 5.25         | 1.06         | 0.313953         | 5.20         | 1.06         | -0.23         |
| -0.38524        | 7.47         | 3.28         | 0.970616         | 9.06         | 2.80         | 0.61          |
| 0.848381        | 8.78         | 4.59         | 1.357482         | 11.86        | 5.60         | 1.22          |
| 0.274807        | 8.74         | 4.55         | 1.347264         | 6.99         | 0.73         | 0.16          |
| -0.218987       | 4.67         | 0.48         | 0.139755         | 5.44         | 0.82         | -0.18         |
| -0.528655       | 3.30         | 0.89         | -0.265354        | 4.34         | 1.92         | -0.42         |
| <b>3.875208</b> | <b>26.07</b> | <b>21.88</b> | <b>6.478135</b>  | <b>34.16</b> | <b>27.90</b> | <b>6.06</b> y |
| -0.303235       | 2.03         | 2.16         | -0.641766        | 10.30        | 4.04         | 0.88          |
| <b>1.398478</b> | <b>13.96</b> | <b>9.77</b>  | <b>2.893189</b>  | <b>17.86</b> | <b>11.60</b> | <b>2.52</b> y |
| 0.175534        | 12.11        | <b>7.92</b>  | <b>2.344119</b>  | 9.33         | 3.07         | 0.67          |
| -0.909859       | 1.96         | 2.23         | -0.661608        | 6.53         | 0.27         | 0.06          |
| <b>2.599928</b> | <b>14.13</b> | <b>9.94</b>  | <b>2.941758</b>  | <b>9.84</b>  | <b>3.58</b>  | <b>0.78</b> y |
| -0.708882       | 1.67         | 2.52         | -0.746664        | 1.84         | 4.42         | -0.96         |
| <b>7.047106</b> | <b>18.84</b> | <b>14.65</b> | <b>4.335756</b>  | <b>18.84</b> | <b>12.58</b> | <b>2.73</b> y |
| 0.675365        | 2.76         | 1.43         | -0.42504         | 3.64         | 2.62         | -0.57         |
| 1.914075        | 5.74         | 1.55         | 0.456255         | 7.65         | 1.39         | 0.30          |
| -0.674296       | 2.20         | 1.99         | -0.589998        | 4.16         | 2.10         | -0.46         |
| -0.722578       | 2.14         | 2.05         | -0.609011        | 1.91         | 4.35         | -0.95         |
| -0.675124       | 3.15         | 1.04         | -0.309185        | 1.13         | 5.13         | -1.12         |
| 0.511664        | 4.24         | 0.05         | 0.014067         | 12.90        | 6.64         | 1.44          |
| -0.574626       | 2.42         | 1.77         | -0.525999        | 3.13         | 3.13         | -0.68         |
| -1.175351       | 1.56         | 2.63         | -0.779389        | 1.64         | 4.62         | -1.01         |
| 0.060944        | 2.52         | 1.67         | -0.494814        | 7.31         | 1.05         | 0.23          |
| -0.628549       | 3.43         | 0.76         | -0.225107        | 1.88         | 4.38         | -0.95         |
| 0.132375        | 1.70         | 2.49         | -0.738638        | 7.37         | 1.11         | 0.24          |
| -0.098031       | 2.32         | 1.87         | -0.554608        | 5.32         | 0.94         | -0.21         |
| -1.053205       | 0.57         | 3.62         | -1.073736        | 1.08         | 5.18         | -1.13         |
| -0.886934       | 0.93         | 3.26         | -0.96564         | 1.72         | 4.55         | -0.99         |
| -0.899285       | 1.83         | 2.36         | -0.69919         | 3.63         | 2.63         | -0.57         |
| -0.847967       | 3.27         | 0.92         | -0.274091        | 5.39         | 0.87         | -0.19         |

|           |              |       |           |              |       |       |      |
|-----------|--------------|-------|-----------|--------------|-------|-------|------|
| -0.275014 | 1.94         | 2.25  | -0.668035 | 6.31         | 0.05  | 0.01  |      |
| -0.163408 | 11.74        | 7.55  | 2.235727  | 3.84         | 2.43  | -0.53 |      |
| 1.526127  | 11.78        | 7.59  | 2.246685  | 7.72         | 1.46  | 0.32  |      |
| 0.259782  | 4.81         | 0.62  | 0.180772  | 3.85         | 2.41  | -0.52 |      |
| 4.800316  | <u>19.43</u> | 15.24 | 4.512264  | <u>11.79</u> | 5.53  | 1.20  | y    |
| 3.657515  | <u>21.47</u> | 17.28 | 5.11553   | <u>19.58</u> | 13.32 | 2.90  | y    |
| 4.217099  | <u>23.53</u> | 19.34 | 5.726792  | <u>23.09</u> | 16.83 | 3.66  | y    |
| 0.731255  | 9.88         | 5.69  | 1.682452  | 10.03        | 3.77  | 0.82  |      |
| -0.390329 | 4.67         | 0.48  | 0.140525  | 4.50         | 1.76  | -0.38 |      |
| 1.494732  | 7.74         | 3.55  | 1.049866  | 11.41        | 5.15  | 1.12  |      |
| 0         | 5.63         | 1.44  | 0.424744  | 6.60         | 0.34  | 0.07  |      |
| 0.799909  | 5.45         | 1.26  | 0.371999  | 13.49        | 7.23  | 1.57  |      |
| -0.297749 | 3.89         | 0.30  | -0.090712 | 5.59         | 0.67  | -0.15 |      |
| 1.056586  | 6.51         | 2.32  | 0.685182  | 14.93        | 8.67  | 1.88  |      |
| 3.413948  | <u>12.91</u> | 8.72  | 2.581043  | <u>29.55</u> | 23.29 | 5.06  | y    |
| 0.006175  | 1.83         | 2.36  | -0.69999  | 7.29         | 1.03  | 0.22  |      |
| 0.592221  | 5.93         | 1.74  | 0.514597  | 19.82        | 13.56 | 2.95  |      |
| -0.258609 | 0.97         | 3.22  | -0.95417  | 7.65         | 1.39  | 0.30  |      |
| 2.824521  | <u>11.31</u> | 7.12  | 2.107788  | <u>23.02</u> | 16.76 | 3.64  | y    |
| -0.273116 | 2.42         | 1.77  | -0.525496 | 11.99        | 5.73  | 1.25  |      |
| -0.843413 | 1.09         | 3.10  | -0.920802 | 3.16         | 3.10  | -0.67 |      |
| -0.678746 | 3.69         | 0.50  | -0.149587 | 5.50         | 0.77  | -0.17 |      |
| -1.048117 | 4.79         | 0.60  | 0.176004  | 3.38         | 2.88  | -0.63 |      |
| -0.295645 | 3.84         | 0.35  | -0.103624 | 5.87         | 0.39  | -0.08 |      |
| 0.07088   | 3.70         | 0.49  | -0.146833 | 3.65         | 2.61  | -0.57 |      |
| -0.168341 | 8.40         | 4.21  | 1.244469  | 10.04        | 3.78  | 0.82  |      |
| -0.899734 | 0.72         | 3.47  | -1.028221 | 2.73         | 3.53  | -0.77 |      |
| -0.258109 | 4.33         | 0.14  | 0.041284  | 6.10         | 0.16  | -0.04 |      |
| -0.793026 | 5.95         | 1.76  | 0.521024  | 4.81         | 1.45  | -0.32 |      |
| 3.550049  | <u>23.71</u> | 19.52 | 5.780692  | <u>32.40</u> | 26.14 | 5.68  | y    |
| -0.52712  | 4.67         | 0.48  | 0.141947  | 3.81         | 2.45  | -0.53 |      |
| -0.604969 | 3.08         | 1.11  | -0.329827 | 8.63         | 2.37  | 0.52  |      |
| 0.086111  | 4.49         | 0.30  | 0.087721  | 6.19         | 0.07  | -0.02 |      |
| 0.465607  | 13.62        | 9.43  | 2.7922    | 9.45         | 3.19  | 0.69  |      |
| -0.538057 | 3.39         | 0.80  | -0.238789 | 6.83         | 0.57  | 0.12  |      |
| 0.502522  | 4.74         | 0.55  | 0.161374  | 8.96         | 2.70  | 0.59  |      |
| 0.864768  | 5.66         | 1.47  | 0.43357   | 18.05        | 11.79 | 2.56  |      |
| -0.692287 | 5.48         | 1.29  | 0.380025  | 5.19         | 1.07  | -0.23 |      |
| -0.785678 | 6.17         | 1.98  | 0.585674  | 5.39         | 0.87  | -0.19 |      |
| -0.587978 | 7.68         | 3.49  | 1.03112   | 2.96         | 3.30  | -0.72 |      |
| -0.553012 | 5.17         | 0.98  | 0.287832  | 6.14         | 0.12  | -0.03 |      |
| 8.08      | 3.92         |       | 4.19      | 2.28         |       | 6.26  | 3.11 |
|           | 11.75        |       |           | 6.84         |       |       | 9.32 |
|           | 5.80         |       |           | 3.38         |       |       | 4.60 |

**Z8**

|       |       |       |       |             |
|-------|-------|-------|-------|-------------|
| 40.39 | 51.92 | A     | B     | C           |
| 29.96 | 56.23 | 3psSD | 17.18 | 17.52 13.64 |

|       |       |           |       |       |       |
|-------|-------|-----------|-------|-------|-------|
| 35.01 | 43.66 | 3ngSD     | 6.80  | 5.02  | 1.82  |
| 45.57 | 49.37 | SumSD     | 23.98 | 22.54 | 15.46 |
| 37.73 | 50.29 | DiffMn    | 39.86 | 33.71 | 46.49 |
| 5.84  | 4.55  | SmovrDiff | 0.60  | 0.67  | 0.33  |
| 5.21  | 4.23  | 1minus    | 0.40  | 0.33  | 0.67  |
| 2.84  | 3.38  |           |       |       |       |
| 4.02  | 3.80  |           |       |       |       |
| 1.67  | 0.61  |           |       |       |       |

|        |        |        |
|--------|--------|--------|
| 15.4   | 5.133  | 30.092 |
| 14.664 | 5.8148 | 28.564 |
| 31.962 | 13.182 | 30.188 |
| 19.997 | 25.137 | 27.591 |

|        |        |        |
|--------|--------|--------|
| 46.795 | 22.34  | 20.981 |
| 35.378 | 30.174 | 22.107 |

**% inf**

|              |                                                         |                  |       |
|--------------|---------------------------------------------------------|------------------|-------|
| 50009.00 A02 | M-011353- PHD finger protein 1                          | 5252.00 PHF1     | 14.20 |
| 50009.00 A04 | M-011352- prefoldin subunit 5                           | 5204.00 PFDN5    | 1.17  |
| 50009.00 A05 | M-017532- homeobox B5                                   | 3215.00 HOXB5    | 2.29  |
| 50009.00 A06 | M-011351- prefoldin subunit 1                           | 5201.00 PFDN1    | 3.37  |
| 50009.00 A07 | M-017336- homeobox B6                                   | 3216.00 HOXB6    | 2.82  |
| 50009.00 A08 | M-009815- SUB1 homolog ( <i>S. cerevisiae</i> )         | 10923.00 SUB1    | 3.96  |
| 50009.00 A09 | M-010515- homeobox B7                                   | 3217.00 HOXB7    | 4.05  |
| 50009.00 A10 | M-015428- pre-B-cell leukemia homeobox interacting      | 57326.00 PBXIP1  | 3.19  |
| 50009.00 A11 | M-017601- homeobox C10                                  | 3226.00 HOXC10   | 3.33  |
| 50009.00 A12 | M-011745- paired box gene 7                             | 5081.00 PAX7     | 3.59  |
| 50009.00 A13 | M-017602- homeobox C11                                  | 3227.00 HOXC11   | 2.92  |
| 50009.00 A14 | M-012240- paired box gene 4                             | 5078.00 PAX4     | 2.65  |
| 50009.00 A15 | M-017600- homeobox C13                                  | 3229.00 HOXC13   | 10.03 |
| 50009.00 A16 | M-012399- paired box gene 3 (Waardenburg syndrom)       | 5077.00 PAX3     | 3.44  |
| 50009.00 A17 | M-013462- homeobox C4                                   | 3221.00 HOXC4    | 3.11  |
| 50009.00 A18 | M-004434- PRKC, apoptosis, WT1, regulator               | 5074.00 PAWR     | 3.00  |
| 50009.00 A19 | M-013381- homeobox C5                                   | 3222.00 HOXC5    | 2.98  |
| 50009.00 A20 | M-013892- GATA zinc finger domain containing 2B         | 57459.00 GATAD2B | 5.77  |
| 50009.00 A21 | M-011871- homeobox C6                                   | 3223.00 HOXC6    | 3.39  |
| 50009.00 A23 | M-012341- homeobox C9                                   | 3225.00 HOXC9    | 12.95 |
| 50009.00 B02 | M-003331- tumor protein p73                             | 7161.00 TP73     | 13.60 |
| 50009.00 B04 | M-003548- tumor protein p53 binding protein, 1          | 7158.00 TP53BP1  | 7.83  |
| 50009.00 B05 | M-012017- paired-like (aristalless) homeobox 2a         | 401.00 PHOX2A    | 2.65  |
| 50009.00 B06 | M-005059- TATA element modulatory factor 1              | 7110.00 TMF1     | 7.74  |
| 50009.00 B07 | M-011553- paired-like homeobox 2b                       | 8929.00 PHOX2B   | 2.35  |
| 50009.00 B08 | M-017174- T-cell leukemia homeobox 2                    | 3196.00 TLX2     | 1.93  |
| 50009.00 B09 | M-020049- putative homeodomain transcription factor     | 10745.00 PHTF1   | 7.69  |
| 50009.00 B10 | M-003933- T-cell leukemia homeobox 1                    | 3195.00 TLX1     | 8.58  |
| 50009.00 B11 | M-004164- protein inhibitor of activated STAT, 3        | 10401.00 PIAS3   | 1.91  |
| 50009.00 B12 | M-019105- thyroid transcription factor 1                | 7080.00 TITF1    | 2.56  |
| 50009.00 B13 | M-006445- protein inhibitor of activated STAT, 4        | 51588.00 PIAS4   | 3.32  |
| 50009.00 B14 | M-006598- Kruppel-like factor 11                        | 8462.00 KLF11    | 1.15  |
| 50009.00 B15 | M-012613- pirin (iron-binding nuclear protein)          | 8544.00 PIR      | 0.85  |
| 50009.00 B16 | M-006566- Kruppel-like factor 10                        | 7071.00 KLF10    | 1.32  |
| 50009.00 B17 | M-017246- paired-like homeodomain transcription factor  | 5307.00 PITX1    | 3.32  |
| 50009.00 B18 | M-011405- TIA1 cytotoxic granule-associated RNA binding | 7073.00 TIAL1    | 1.07  |
| 50009.00 B19 | M-017315- paired-like homeodomain transcription factor  | 5308.00 PITX2    | 8.90  |
| 50009.00 B20 | M-017279- TGFB-induced factor homeobox 2-like, Y-linked | 90655.00 TGIF2LY | 1.88  |
| 50009.00 B21 | M-017325- paired-like homeodomain transcription factor  | 5309.00 PITX3    | 1.46  |
| 50009.00 B23 | M-021413- PBX/knotted 1 homeobox 1                      | 5316.00 PKNOX1   | 11.29 |
| 50009.00 C02 | M-009857- orthodenticle homeobox 1                      | 5013.00 OTX1     | 0.88  |
| 50009.00 C04 | M-019872- one cut domain, family member 2               | 9480.00 ONECUT2  | 0.96  |
| 50009.00 C05 | M-011696- homeobox D10                                  | 3236.00 HOXD10   | 2.41  |
| 50009.00 C06 | M-012672- one cut homeobox 1                            | 3175.00 ONECUT1  | 7.94  |
| 50009.00 C07 | M-013095- homeobox D11                                  | 3237.00 HOXD11   | 8.26  |
| 50009.00 C08 | M-010213- Y box binding protein 1                       | 4904.00 YBX1     | 4.39  |

|              |                                                        |                       |              |
|--------------|--------------------------------------------------------|-----------------------|--------------|
| 50009.00 C09 | M-013096- homeobox D12                                 | 3238.00 HOXD12        | 6.28         |
| 50009.00 C10 | M-010322- neural retina leucine zipper                 | 4901.00 NRL           | 5.52         |
| 50009.00 C11 | M-011053- homeobox D13                                 | 3239.00 HOXD13        | 2.14         |
| 50009.00 C12 | M-006686- nuclear receptor interacting protein 1       | 8204.00 NRIP1         | 3.24         |
| 50009.00 C13 | M-017579- homeobox D4                                  | 3233.00 HOXD4         | 2.70         |
| 50009.00 C14 | M-017924- nuclear respiratory factor 1                 | 4899.00 NRF1          | 5.62         |
| 50009.00 C15 | M-013244- homeobox D8                                  | 3234.00 HOXD8         | 3.85         |
| 50009.00 C16 | M-004202- N-myc (and STAT) interactor                  | 9111.00 NMI           | 2.76         |
| 50009.00 C17 | M-012494- homeobox D9                                  | 3235.00 HOXD9         | 2.09         |
| 50009.00 C18 | M-018223- NK6 transcription factor related, locus 2 (l | 84504.00 NKX6-2       | 3.49         |
| 50009.00 C19 | M-011872- hairless homolog (mouse)                     | 55806.00 HR           | 3.23         |
| 50009.00 C20 | M-020083- NK6 transcription factor related, locus 1 (l | 4825.00 NKX6-1        | 2.50         |
| 50009.00 C21 | M-011294- heat shock factor binding protein 1          | 3281.00 HSBP1         | 4.24         |
| 50009.00 C23 | M-012109- heat shock transcription factor 1            | 3297.00 HSF1          | 4.46         |
| 50009.00 D02 | M-019164- TGFB-induced factor homeobox 2-like, X-l     | 90316.00 TGIF2LX      | 4.24         |
| 50009.00 D04 | M-017124- TGFB-induced factor homeobox 2               | 60436.00 TGIF2        | 3.44         |
| 50009.00 D05 | M-011354- pleiomorphic adenoma gene 1                  | 5324.00 PLAG1         | 1.66         |
| 50009.00 D06 | M-011404- TGFB-induced factor homeobox 1               | 7050.00 TGIF1         | 0.95         |
| 50009.00 D07 | M-010531- pleiomorphic adenoma gene-like 2             | 5326.00 PLAGL2        | 4.18         |
| 50009.00 D08 | M-009680- transcription factor EC                      | 22797.00 TFEC         | 7.09         |
| 50009.00 D09 | M-009899- jumonji, AT rich interactive domain 1B       | 10765.00 JARID1B      | 4.77         |
| 50009.00 D10 | M-009798- transcription factor EB                      | 7942.00 TFEF          | 2.08         |
| 50009.00 D11 | M-012546- POU domain, class 1, transcription factor :  | 5449.00 POU1F1        | 0.53         |
| 50009.00 D12 | M-009363- transcription factor binding to IGHM enha    | 7030.00 TFE3          | 3.62         |
| 50009.00 D13 | M-020133- POU domain, class 2, associating factor 1    | 5450.00 POU2AF1       | 1.88         |
| 50009.00 D14 | M-003328- transcription factor Dp-2 (E2F dimerizatio   | 7029.00 TFDP2         | 2.22         |
| 50009.00 D15 | M-019689- POU domain, class 2, transcription factor :  | 5451.00 POU2F1        | 3.45         |
| 50009.00 D16 | M-003327- transcription factor Dp-1                    | 7027.00 TFDP1         | 5.79         |
| 50009.00 D17 | M-019690- POU domain, class 2, transcription factor :  | 5452.00 POU2F2        | 3.49         |
| 50009.00 D18 | M-016232- transcription factor CP2                     | 7024.00 TFPCP2        | 2.28         |
| 50009.00 D19 | M-020587- POU domain, class 2, transcription factor :  | 25833.00 POU2F3       | 5.45         |
| 50009.00 D20 | M-009504- transcription factor AP-4 (activating enhar  | 7023.00 TFAP4         | 10.35        |
| 50009.00 D21 | M-017709- POU domain, class 3, transcription factor :  | 5453.00 <u>POU3F1</u> | <u>10.71</u> |
| 50009.00 D23 | M-020029- POU domain, class 3, transcription factor :  | 5454.00 POU3F2        | 7.30         |
| 50009.00 E02 | M-015422- NK3 transcription factor related, locus 1 (l | 4824.00 NKX3-1        | 5.82         |
| 50009.00 E04 | M-008241- NK2 transcription factor related, locus 8 (l | 26257.00 NKX2-8       | 1.88         |
| 50009.00 E05 | M-011874- heat shock transcription factor 2            | 3298.00 HSF2          | 4.12         |
| 50009.00 E06 | M-019795- NK2 transcription factor related, locus 5 (l | 1482.00 <u>NKX2-5</u> | <u>11.04</u> |
| 50009.00 E07 | M-011295- heat shock transcription factor 4            | 3299.00 HSF4          | 10.79        |
| 50009.00 E08 | M-016090- NK2 transcription factor related, locus 3 (l | 159296.00 NKX2-3      | 6.98         |
| 50009.00 E09 | M-015065- heat shock transcription factor, Y-linked 1  | 86614.00 <u>HSFY1</u> | <u>16.44</u> |
| 50009.00 E10 | M-011341- NK2 transcription factor related, locus 2 (l | 4821.00 NKX2-2        | 4.03         |
| 50009.00 E11 | M-019678- ecdysoless homolog (Drosophila)              | 11319.00 ECD          | 6.91         |
| 50009.00 E12 | M-009353- nuclear transcription factor Y, gamma        | 4802.00 NFYC          | 9.32         |
| 50009.00 E13 | M-016068- HIV-1 Tat interactive protein 2, 30kDa       | 10553.00 HTATIP2      | 9.33         |
| 50009.00 E14 | M-010002- nuclear transcription factor Y, beta         | 4801.00 NFYB          | 2.72         |
| 50009.00 E15 | M-011699- interferon regulatory factor 8               | 3394.00 IRF8          | 8.71         |

|                     |                                                       |                             |                     |
|---------------------|-------------------------------------------------------|-----------------------------|---------------------|
| 50009.00 E16        | M-009213- nuclear transcription factor Y, alpha       | 4800.00 NFYA                | 0.87                |
| 50009.00 E17        | M-009905- inhibitor of DNA binding 3, dominant nega   | 3399.00 ID3                 | 2.18                |
| 50009.00 E18        | M-013665- nuclear factor of kappa light polypeptide ξ | 4796.00 NFKBIL2             | 5.47                |
| 50009.00 E19        | M-008913- inhibitor of DNA binding 4, dominant nega   | 3400.00 ID4                 | 6.08                |
| 50009.00 E20        | M-003918- nuclear factor of kappa light polypeptide ξ | 4791.00 NFKB2               | 4.20                |
| 50009.00 E21        | M-020004- interferon, gamma-inducible protein 16      | 3428.00 IFI16               | 4.92                |
| 50009.00 E23        | M-008354- forkhead box K2                             | 3607.00 FOXP2               | 1.00                |
| 50009.00 F02        | M-005238- transcription factor AP-2 gamma (activati   | 7022.00 TFAP2C              | 3.55                |
| 50009.00 F04        | M-015663- transcription factor AP-2 delta (activating | 83741.00 TFAP2D             | 0.90                |
| 50009.00 F05        | M-020135- POU domain, class 3, transcription factor : | 5455.00 POU3F3              | 2.74                |
| 50009.00 F06        | M-017730- transcription factor AP-2 beta (activating  | 7021.00 TFAP2B              | 3.33                |
| 50009.00 F07        | M-019344- POU domain, class 3, transcription factor : | 5456.00 POU3F4              | 2.95                |
| 50009.00 F08        | M-006348- transcription factor AP-2 alpha (activating | 7020.00 TFAP2A              | 1.54                |
| 50009.00 F09        | M-016061- POU domain, class 4, transcription factor : | 5457.00 POU4F1              | 1.97                |
| 50009.00 F10        | M-019734- transcription factor A, mitochondrial       | 7019.00 TFAM                | 1.71                |
| 50009.00 F11        | M-012593- POU domain, class 4, transcription factor : | 5459.00 POU4F3              | 4.44                |
| <b>50009.00 F12</b> | <b>M-012604- TEA domain family member 3</b>           | <b>7005.00 <u>TEAD3</u></b> | <b><u>7.34</u></b>  |
| 50009.00 F13        | M-005111- peroxisome proliferator-activated recepto   | 10891.00 PPARGC1A           | 3.46                |
| 50009.00 F14        | M-012603- TEA domain family member 1 (SV40 trans      | 7003.00 TEAD1               | 0.91                |
| 50009.00 F15        | M-009322- PR domain containing 1, with ZNF domain     | 639.00 PRDM1                | 5.95                |
| 50009.00 F16        | M-009724- MAX-like protein X                          | 6945.00 MLX                 | 3.92                |
| 50009.00 F17        | M-007043- PR domain containing 16                     | 63976.00 PRDM16             | 2.75                |
| 50009.00 F18        | M-020097- vacuolar protein sorting 72 homolog (S. ce  | 6944.00 VPS72               | 4.47                |
| 50009.00 F19        | M-010550- PR domain containing 2, with ZNF domain     | 7799.00 PRDM2               | 8.02                |
| 50009.00 F20        | M-006564- zinc finger E-box binding homeobox 1        | 6935.00 ZEB1                | 4.83                |
| 50009.00 F21        | M-006940- PR domain containing 4                      | 11108.00 PRDM4              | 7.34                |
| 50009.00 F23        | M-020137- prophet of Pit1, paired-like homeodomain    | 5626.00 PROP1               | 2.14                |
| 50009.00 G02        | M-003520- nuclear factor of kappa light polypeptide ξ | 4790.00 NFKB1               | 5.67                |
| 50009.00 G03        | M-003290- polo-like kinase 1 (Drosophila)             | 5347.00 PLK1 SMAF           | 6.40                |
| 50009.00 G04        | M-009250- nuclear factor I/X (CCAAT-binding transcri  | 4784.00 NFIX                | 3.97                |
| 50009.00 G05        | M-012442- interleukin enhancer binding factor 3, 90k  | 3609.00 ILF3                | 6.26                |
| 50009.00 G06        | M-012704- nuclear factor, interleukin 3 regulated     | 4783.00 NFIL3               | 6.34                |
| <b>50009.00 G07</b> | <b>M-011059- pancreatic and duodenal homeobox 1</b>   | <b>3651.00 <u>PDX1</u></b>  | <b><u>15.67</u></b> |
| 50009.00 G08        | M-008362- nuclear factor I/C (CCAAT-binding transcri  | 4782.00 NFIC                | 4.42                |
| 50009.00 G09        | M-011704- interferon regulatory factor 1              | 3659.00 IRF1                | 9.61                |
| 50009.00 G10        | M-008456- nuclear factor I/B                          | 4781.00 NFIB                | 3.33                |
| 50009.00 G11        | M-011705- interferon regulatory factor 2              | 3660.00 IRF2                | 7.36                |
| 50009.00 G12        | M-008661- nuclear factor I/A                          | 4774.00 NFIA                | 8.14                |
| 50009.00 G13        | M-006875- interferon regulatory factor 3              | 3661.00 IRF3                | 4.73                |
| 50009.00 G14        | M-009308- nuclear factor (erythroid-derived 2)-like 3 | 9603.00 NFE2L3              | 3.79                |
| 50009.00 G15        | M-019668- interferon regulatory factor 4              | 3662.00 IRF4                | 3.90                |
| 50009.00 G16        | M-003755- nuclear factor (erythroid-derived 2)-like 2 | 4780.00 NFE2L2              | 5.27                |
| 50009.00 G17        | M-011706- interferon regulatory factor 5              | 3663.00 IRF5                | 7.01                |
| 50009.00 G18        | M-019733- nuclear factor (erythroid-derived 2)-like 1 | 4779.00 NFE2L1              | 3.70                |
| 50009.00 G19        | M-012227- interferon regulatory factor 6              | 3664.00 IRF6                | 5.66                |
| 50009.00 G20        | M-010049- nuclear factor (erythroid-derived 2), 45kD  | 4778.00 NFE2                | 5.37                |
| <b>50009.00 G21</b> | <b>M-011810- interferon regulatory factor 7</b>       | <b>3665.00 <u>IRF7</u></b>  | <b><u>15.56</u></b> |



|              |                                                          |                        |              |
|--------------|----------------------------------------------------------|------------------------|--------------|
| 50009.00 G23 | M-020865- iroquois homeobox protein 4                    | 50805.00 IRX4          | 4.70         |
| 50009.00 H02 | M-014703- transcription factor 7-like 1 (T-cell specific | 83439.00 TCF7L1        | 3.32         |
| 50009.00 H03 | M-003290- polo-like kinase 1 (Drosophila)                | 5347.00 PLK1 SMAF      | 6.71         |
| 50009.00 H04 | M-019735- transcription factor 7 (T-cell specific, HMG   | 6932.00 TCF7           | 8.70         |
| 50009.00 H05 | M-012402- paired related homeobox 1                      | 5396.00 PRRX1          | 3.27         |
| 50009.00 H06 | M-004594- transcription factor 4                         | 6925.00 TCF4           | 8.37         |
| 50009.00 H07 | M-013242- paired related homeobox 2                      | 51450.00 PRRX2         | 3.46         |
| 50009.00 H08 | M-009384- transcription factor 3 (E2A immunoglobuli      | 6929.00 TCF3           | 6.69         |
| 50009.00 H09 | M-012136- purine-rich element binding protein A          | 5813.00 PURA           | 8.60         |
| 50009.00 H10 | M-009923- transcription factor 21                        | 6943.00 TCF21          | 2.11         |
| 50009.00 H11 | M-003296- retinoblastoma 1 (including osteosarcoma       | 5925.00 <u>RB1</u>     | <u>11.77</u> |
| 50009.00 H12 | M-012154- transcription factor 20 (AR1)                  | 6942.00 TCF20          | 14.72        |
| 50009.00 H13 | M-013107- RB-associated KRAB zinc finger                 | 57786.00 RBAK          | 6.37         |
| 50009.00 H14 | M-009721- transcription factor 2, hepatic; LF-B3; vari   | 6928.00 TCF2           | 4.80         |
| 50009.00 H15 | M-003949- AT rich interactive domain 4A (RBP1-like)      | 5926.00 ARID4A         | 11.26        |
| 50009.00 H16 | M-010091- transcription factor 15 (basic helix-loop-h    | 6939.00 TCF15          | 5.43         |
| 50009.00 H17 | M-003297- jumonji, AT rich interactive domain 1A         | 5927.00 JARID1A        | 4.16         |
| 50009.00 H18 | M-006356- transcription factor 12 (HTF4, helix-loop-h    | 6938.00 TCF12          | 4.65         |
| 50009.00 H19 | M-004767- v-rel reticuloendotheliosis viral oncogene     | 5971.00 <u>RELB</u>    | <u>12.13</u> |
| 50009.00 H20 | M-008215- transcription factor 1, hepatic; LF-B1, hep    | 6927.00 TCF1           | 4.26         |
| 50009.00 H21 | M-008367- arginine-glutamic acid dipeptide (RE) repe     | 473.00 RERE            | 8.38         |
| 50009.00 H23 | M-006466- RE1-silencing transcription factor             | 5978.00 REST           | 4.53         |
| 50009.00 I02 | M-009584- nuclear factor of activated T-cells, cytopla   | 4776.00 NFATC4         | 6.58         |
| 50009.00 I03 | D-001206- siControl non-targeting siRNA #2               |                        | 3.52         |
| 50009.00 I04 | M-009391- nuclear factor of activated T-cells, cytopla   | 4775.00 NFATC3         | 3.88         |
| 50009.00 I05 | M-020858- interferon-stimulated transcription factor     | 10379.00 <u>ISGF3G</u> | <u>9.82</u>  |
| 50009.00 I06 | M-003606- nuclear factor of activated T-cells, cytopla   | 4773.00 <u>NFATC2</u>  | <u>6.27</u>  |
| 50009.00 I07 | M-016725- ISL2 transcription factor, LIM/homeodom        | 64843.00 ISL2          | 3.65         |
| 50009.00 I08 | M-003605- nuclear factor of activated T-cells, cytopla   | 4772.00 NFATC1         | 8.66         |
| 50009.00 I09 | M-003268- jun oncogene                                   | 3725.00 JUN            | 4.89         |
| 50009.00 I10 | M-009618- nuclear factor of activated T-cells 5, tonici  | 10725.00 NFAT5         | 4.94         |
| 50009.00 I11 | M-003269- jun B proto-oncogene                           | 3726.00 JUNB           | 2.87         |
| 50009.00 I12 | M-008667- neurogenic differentiation 1                   | 4760.00 NEUROD1        | 4.94         |
| 50009.00 I13 | M-003900- jun D proto-oncogene                           | 3727.00 JUND           | 3.18         |
| 50009.00 I14 | M-020145- nuclear receptor co-repressor 2                | 9612.00 NCOR2          | 4.15         |
| 50009.00 I15 | M-020168- Kruppel-like factor 1 (erythroid)              | 10661.00 KLF1          | 7.97         |
| 50009.00 I16 | M-003518- nuclear receptor co-repressor 1                | 9611.00 NCOR1          | 6.03         |
| 50009.00 I17 | M-013353- Kruppel-like factor 12                         | 11278.00 KLF12         | 4.79         |
| 50009.00 I18 | M-010321- nuclear receptor coactivator 4                 | 8031.00 NCOA4          | 4.21         |
| 50009.00 I19 | M-006994- Kruppel-like factor 13                         | 51621.00 KLF13         | 6.25         |
| 50009.00 I20 | M-014489- Nanog homeobox                                 | 79923.00 NANOG         | 5.10         |
| 50009.00 I21 | M-006928- Kruppel-like factor 2 (lung)                   | 10365.00 KLF2          | 11.33        |
| 50009.00 I23 | M-006987- Kruppel-like factor 3 (basic)                  | 51274.00 KLF3          | 8.22         |
| 50009.00 J02 | M-012278- transcription elongation regulator 1           | 10915.00 TCERG1        | 7.18         |
| 50009.00 J04 | M-005143- transcription elongation factor B (SIII), pol  | 6924.00 TCEB3          | 3.86         |
| 50009.00 J05 | M-010147- regulatory factor X, 1 (influences HLA clas    | 5989.00 RFX1           | 3.74         |
| 50009.00 J06 | M-022071- transcription elongation factor A (SII), 3     | 6920.00 TCEA3          | 2.00         |



|                     |                                                             |                      |              |
|---------------------|-------------------------------------------------------------|----------------------|--------------|
| 50009.00 J07        | M-011129- regulatory factor X, 2 (influences HLA clas:      | 5990.00 RFX2         | 4.99         |
| 50009.00 J08        | M-016235- transcription elongation factor A (SII), 2        | 6919.00 TCEA2        | 0.83         |
| 50009.00 J09        | M-011764- regulatory factor X, 3 (influences HLA clas:      | 5991.00 RFX3         | 3.12         |
| <b>50009.00 J10</b> | <b>M-010496- transcription elongation factor A (SII), 1</b> | <b>6917.00 TCEA1</b> | <b>4.35</b>  |
| 50009.00 J11        | M-011103- regulatory factor X, 5 (influences HLA clas:      | 5993.00 RFX5         | 5.78         |
| 50009.00 J12        | M-011896- T-box 6                                           | 6911.00 TBX6         | 4.16         |
| 50009.00 J13        | M-011503- regulatory factor X-associated ankyrin-cor        | 8625.00 RFXANK       | 2.78         |
| 50009.00 J14        | M-013410- T-box 5                                           | 6910.00 TBX5         | 2.33         |
| 50009.00 J15        | M-011104- regulatory factor X-associated protein            | 5994.00 RFXAP        | 0.84         |
| 50009.00 J16        | M-013376- T-box 4                                           | 9496.00 TBX4         | 2.58         |
| 50009.00 J17        | M-006555- rearranged L-myc fusion                           | 6018.00 RLF          | 2.33         |
| 50009.00 J18        | M-012197- T-box 3 (ulnar mammary syndrome)                  | 6926.00 TBX3         | 3.78         |
| 50009.00 J19        | M-019150- ras responsive element binding protein 1          | 6239.00 RREB1        | 4.56         |
| 50009.00 J20        | M-013116- T-box 22                                          | 50945.00 TBX22       | 7.65         |
| 50009.00 J21        | M-003926- runt-related transcription factor 1 (acute i      | 861.00 RUNX1         | 5.28         |
| 50009.00 J23        | M-012665- runt-related transcription factor 2               | 860.00 RUNX2         | 9.84         |
| 50009.00 K02        | M-020080- NGFI-A binding protein 2 (EGR1 binding pr         | 4665.00 NAB2         | 4.68         |
| 50009.00 K04        | M-022771- myelin transcription factor 1-like                | 23040.00 MYT1L       | 3.98         |
| 50009.00 K05        | M-005089- Kruppel-like factor 4 (gut)                       | 9314.00 KLF4         | 4.02         |
| 50009.00 K06        | M-005271- myelin transcription factor 1                     | 4661.00 MYT1         | 2.08         |
| <b>50009.00 K07</b> | <b>M-013571- Kruppel-like factor 5 (intestinal)</b>         | <b>688.00 KLF5</b>   | <b>5.67</b>  |
| 50009.00 K08        | M-010029- myogenin (myogenic factor 4)                      | 4656.00 MYOG         | 2.45         |
| 50009.00 K09        | M-019540- Kruppel-like factor 7 (ubiquitous)                | 8609.00 KLF7         | 2.66         |
| 50009.00 K10        | M-010316- myogenic differentiation 1                        | 4654.00 MYOD1        | 1.09         |
| 50009.00 K11        | M-012289- ladybird homeobox 1                               | 10660.00 LBX1        | 1.85         |
| 50009.00 K12        | M-009758- myogenic factor 6 (herculin)                      | 4618.00 MYF6         | 3.21         |
| 50009.00 K13        | M-016010- LIM domain binding 1                              | 8861.00 LDB1         | 0.79         |
| 50009.00 K14        | M-009759- myogenic factor 5                                 | 4617.00 MYF5         | 2.18         |
| 50009.00 K15        | M-012570- LIM domain binding 2                              | 9079.00 LDB2         | 1.82         |
| 50009.00 K16        | M-003913- v-myc myelocytomatosis viral related onc          | 4613.00 MYCN         | 1.53         |
| 50009.00 K17        | M-013588- LIM homeobox 3                                    | 8022.00 LHX3         | 2.20         |
| 50009.00 K18        | M-010591- v-myc myelocytomatosis viral oncogene h           | 4611.00 MYCL2        | 2.14         |
| 50009.00 K19        | M-010590- LIM homeobox 4                                    | 89884.00 LHX4        | 5.46         |
| 50009.00 K20        | M-003912- v-myc myelocytomatosis viral oncogene h           | 4610.00 MYCL1        | 1.74         |
| 50009.00 K21        | M-013034- LIM homeobox 5                                    | 64211.00 LHX5        | 1.24         |
| 50009.00 K23        | M-012840- LIM homeobox 6                                    | 26468.00 LHX6        | 1.08         |
| 50009.00 L02        | M-005217- T-box 21                                          | 30009.00 TBX21       | 1.46         |
| 50009.00 L04        | M-012196- T-box 2                                           | 6909.00 TBX2         | 8.66         |
| 50009.00 L05        | M-012140- Sin3A-associated protein, 18kDa                   | 10284.00 SAP18       | 2.47         |
| 50009.00 L06        | M-011910- T-box 19                                          | 9095.00 TBX19        | 1.95         |
| <b>50009.00 L07</b> | <b>M-011538- Sin3A-associated protein, 30kDa</b>            | <b>8819.00 SAP30</b> | <b>13.82</b> |
| 50009.00 L08        | M-012300- T-box, brain, 1                                   | 10716.00 TBR1        | 1.73         |
| 50009.00 L09        | M-017666- sex comb on midleg-like 1 (Drosophila)            | 6322.00 SCML1        | 5.71         |
| 50009.00 L10        | M-017254- TBP-like 1                                        | 9519.00 TBPL1        | 7.41         |
| 50009.00 L11        | M-011107- short stature homeobox                            | 6473.00 SHOX         | 9.03         |
| 50009.00 L12        | M-011790- TATA box binding protein                          | 6908.00 TBP          | 4.21         |
| 50009.00 L13        | M-011390- short stature homeobox 2                          | 6474.00 SHOX2        | 7.28         |

|                     |                                                               |                         |              |
|---------------------|---------------------------------------------------------------|-------------------------|--------------|
| 50009.00 L14        | M-012394- TAR DNA binding protein                             | 23435.00 TARDBP         | 3.54         |
| 50009.00 L15        | M-020093- sine oculis homeobox homolog 1 (Drosopl             | 6495.00 SIX1            | 2.09         |
| 50009.00 L16        | M-011400- TAF9 RNA polymerase II, TATA box binding            | 6880.00 TAF9            | 1.77         |
| 50009.00 L17        | M-017024- sine oculis homeobox homolog 2 (Drosopl             | 10736.00 SIX2           | 3.60         |
| 50009.00 L18        | M-012939- TAF7-like RNA polymerase II, TATA box bir           | 54457.00 TAF7L          | 2.71         |
| 50009.00 L19        | M-019974- sine oculis homeobox homolog 3 (Drosopl             | 6496.00 SIX3            | 4.00         |
| 50009.00 L20        | M-013669- TAF7 RNA polymerase II, TATA box binding            | 6879.00 TAF7            | 4.76         |
| 50009.00 L21        | M-020267- sine oculis homeobox homolog 4 (Drosopl             | 51804.00 SIX4           | 5.39         |
| 50009.00 L23        | M-019526- sine oculis homeobox homolog 6 (Drosopl             | 4990.00 SIX6            | 12.40        |
| 50009.00 M02        | M-003282- v-myc myelocytomatosis viral oncogene h             | 4609.00 MYC             | 4.72         |
| 50009.00 M04        | M-010444- v-myb myeloblastosis viral oncogene hom             | 4605.00 MYBL2           | 4.78         |
| 50009.00 M05        | M-018211- LIM homeobox transcription factor 1, alpt           | 4009.00 LMX1A           | 4.08         |
| <b>50009.00 M06</b> | <b>M-010526- v-myb myeloblastosis viral oncogene hom</b>      | <b>4603.00 MYBL1</b>    | <b>7.75</b>  |
| 50009.00 M07        | M-012586- LIM homeobox transcription factor 1, beti           | 4010.00 LMX1B           | 6.13         |
| 50009.00 M08        | M-003910- v-myb myeloblastosis viral oncogene hom             | 4602.00 MYB             | 7.48         |
| 50009.00 M09        | M-020814- leucine zipper, putative tumor suppressor           | 11178.00 LZTS1          | 8.90         |
| 50009.00 M10        | M-009947- MAX interactor 1                                    | 4601.00 MXI1            | 6.17         |
| 50009.00 M11        | M-009325- MAX dimerization protein 1                          | 4084.00 MXD1            | 6.10         |
| 50009.00 M12        | M-010060- MAX dimerization protein 4                          | 10608.00 MXD4           | 7.85         |
| <b>50009.00 M13</b> | <b>M-020067- SMAD family member 3</b>                         | <b>4088.00 SMAD3</b>    | <b>15.75</b> |
| 50009.00 M14        | M-020078- metal-regulatory transcription factor 1             | 4520.00 MTF1            | 5.76         |
| 50009.00 M15        | M-003902- SMAD family member 4                                | 4089.00 SMAD4           | 9.81         |
| 50009.00 M16        | M-012346- mitochondrial transcription termination fa          | 7978.00 MTERF           | 5.30         |
| 50009.00 M17        | M-003746- v-maf musculoaponeurotic fibrosarcoma c             | 4094.00 MAF             | 5.14         |
| 50009.00 M18        | M-008482- metastasis associated 1 family, member 2            | 9219.00 MTA2            | 5.77         |
| 50009.00 M19        | M-009109- v-maf musculoaponeurotic fibrosarcoma c             | 4097.00 MAFG            | 5.84         |
| 50009.00 M20        | M-011734- msh homeobox 2                                      | 4488.00 MSX2            | 2.81         |
| 50009.00 M21        | M-008580- v-maf musculoaponeurotic fibrosarcoma c             | 7975.00 MAFK            | 9.92         |
| 50009.00 M23        | M-008359- methyl-CpG binding domain protein 1                 | 4152.00 MBD1            | 5.91         |
| 50009.00 N02        | M-012239- TAF6-like RNA polymerase II, p300/CBP-as            | 10629.00 TAF6L          | 5.19         |
| 50009.00 N04        | M-012147- TAF6 RNA polymerase II, TATA box binding            | 6878.00 TAF6            | 3.40         |
| <b>50009.00 N05</b> | <b>M-007576- solute carrier family 40 (iron-regulated tra</b> | <b>30061.00 SLC40A1</b> | <b>15.19</b> |
| 50009.00 N06        | M-012520- TAF5-like RNA polymerase II, p300/CBP-as            | 27097.00 TAF5L          | 12.47        |
| 50009.00 N07        | M-011393- SWI/SNF related, matrix associated, actin           | 6603.00 SMARCD2         | 7.59         |
| 50009.00 N08        | M-012357- TAF5 RNA polymerase II, TATA box binding            | 6877.00 TAF5            | 5.77         |
| 50009.00 N09        | M-009459- SWI/SNF related, matrix associated, actin           | 6604.00 SMARCD3         | 6.55         |
| 50009.00 N10        | M-023415- TAF4b RNA polymerase II, TATA box bindii            | 6875.00 TAF4B           | 5.31         |
| 50009.00 N11        | M-017522- SWI/SNF related, matrix associated, actin           | 6605.00 SMARCE1         | 2.88         |
| 50009.00 N12        | M-012145- TATA box binding protein (TBP)-associatec           | 9014.00 TAF1B           | 6.92         |
| 50009.00 N13        | M-017263- AT rich interactive domain 1A (SWI-like)            | 8289.00 ARID1A          | 13.58        |
| 50009.00 N14        | M-012149- TAF12 RNA polymerase II, TATA box bindii            | 6883.00 TAF12           | 5.97         |
| 50009.00 N15        | M-019579- small nuclear RNA activating complex, pol           | 6618.00 SNAPC2          | 6.13         |
| 50009.00 N16        | M-012148- TAF11 RNA polymerase II, TATA box bindii            | 6882.00 TAF11           | 6.68         |
| 50009.00 N17        | M-010056- Jun dimerization protein p21SNFT                    | 55509.00 SNFT           | 7.22         |
| 50009.00 N18        | M-012265- TAF10 RNA polymerase II, TATA box bindii            | 6881.00 TAF10           | 1.73         |
| 50009.00 N19        | M-012446- SNW domain containing 1                             | 22938.00 SNW1           | 9.96         |
| 50009.00 N20        | M-017508- transcriptional adaptor 3 (NGG1 homolog             | 10474.00 TADA3L         | 7.34         |

|              |                                                        |                     |              |
|--------------|--------------------------------------------------------|---------------------|--------------|
| 50009.00 N21 | M-017192- SRY (sex determining region Y)-box 10        | 6663.00 SOX10       | 11.28        |
| 50009.00 N23 | M-012354- SRY (sex determining region Y)-box 15        | 6665.00 SOX15       | 8.50         |
| 50009.00 O02 | M-011733- msh homeobox 1                               | 4487.00 MSX1        | 7.61         |
| 50009.00 O04 | M-006335- musculin (activated B-cell factor-1)         | 9242.00 MSC         | 4.83         |
| 50009.00 O05 | M-011555- methyl-CpG binding domain protein 2          | 8932.00 MBD2        | 1.63         |
| 50009.00 O06 | M-019852- mortality factor 4                           | 10934.00 MORF4      | 4.01         |
| 50009.00 O07 | M-019917- myelodysplasia syndrome 1                    | 4197.00 MDS1        | 5.31         |
| 50009.00 O08 | M-009373- MAX binding protein                          | 4335.00 MNT         | 5.51         |
| 50009.00 O09 | M-013094- methyl CpG binding protein 2 (Rett syndrc    | 4204.00 MECP2       | 6.63         |
| 50009.00 O10 | M-003016- myeloid/lymphoid or mixed-lineage leuke      | 4303.00 MLLT7       | 4.42         |
| 50009.00 O11 | M-009362- MADS box transcription enhancer factor 2     | 4205.00 MEF2A       | 9.71         |
| 50009.00 O12 | M-019827- myeloid/lymphoid or mixed-lineage leuke      | 8028.00 MLLT10      | 7.83         |
| 50009.00 O13 | M-009342- MADS box transcription enhancer factor 2     | 4207.00 MEF2B       | 7.13         |
| 50009.00 O14 | M-009670- myeloid/lymphoid or mixed-lineage leuke      | 9757.00 MLL4        | 6.02         |
| 50009.00 O15 | M-009455- MADS box transcription enhancer factor 2     | 4208.00 MEF2C       | 10.00        |
| 50009.00 O16 | M-009914- myeloid/lymphoid or mixed-lineage leuke      | 4297.00 MLL         | 16.12        |
| 50009.00 O17 | M-009884- MADS box transcription enhancer factor 2     | 4209.00 MEF2D       | 11.97        |
| 50009.00 O18 | M-014759- Mix1 homeobox-like 1 (Xenopus laevis)        | 83881.00 MIXL1      | 6.21         |
| 50009.00 O19 | M-011330- Meis homeobox 2                              | 4212.00 MEIS2       | 2.53         |
| 50009.00 O20 | M-008674- microphthalmia-associated transcription f    | 4286.00 MITF        | 3.44         |
| 50009.00 O21 | M-011878- mesenchyme homeobox 1                        | 4222.00 MEOX1       | 1.97         |
| 50009.00 O23 | M-012176- mesenchyme homeobox 2                        | 4223.00 MEOX2       | 15.35        |
| 50009.00 P02 | M-017516- transcriptional adaptor 2 (ADA2 homolog,     | 6871.00 TADA2L      | 15.97        |
| 50009.00 P04 | M-011399- T, brachyury homolog (mouse)                 | 6862.00 T           | 4.20         |
| 50009.00 P05 | M-019035- SRY (sex determining region Y)-box 18        | 54345.00 SOX18      | 7.28         |
| 50009.00 P06 | M-012602- suppressor of Ty 4 homolog 1 (S. cerevisia   | 6827.00 SUPT4H1     | 4.36         |
| 50009.00 P07 | M-011778- SRY (sex determining region Y)-box 2         | 6657.00 SOX2        | 8.05         |
| 50009.00 P08 | M-015382- suppressor of fused homolog (Drosophila)     | 51684.00 SUFU       | 7.25         |
| 50009.00 P09 | M-011779- SRY (sex determining region Y)-box 4         | 6659.00 SOX4        | 7.58         |
| 50009.00 P10 | M-019194- synovial sarcoma, X breakpoint 1             | 6756.00 SSX1        | 7.41         |
| 50009.00 P11 | M-019032- SRY (sex determining region Y)-box 8         | 30812.00 SOX8       | 5.21         |
| 50009.00 P12 | M-011780- sex determining region Y                     | 6736.00 SRY         | 9.30         |
| 50009.00 P13 | M-021507- SRY (sex determining region Y)-box 9 (car    | 6662.00 <u>SOX9</u> | <u>13.12</u> |
| 50009.00 P14 | M-009800- serum response factor (c-fos serum respo     | 6722.00 SRF         | 11.35        |
| 50009.00 P15 | M-026959- Sp1 transcription factor                     | 6667.00 SP1         | 6.59         |
| 50009.00 P16 | M-006891- sterol regulatory element binding transcri   | 6720.00 SREBF1      | 18.97        |
| 50009.00 P17 | M-016508- SP140 nuclear body protein                   | 11262.00 SP140      | 11.93        |
| 50009.00 P18 | M-019722- Spi-B transcription factor (Spi-1/PU.1 relat | 6689.00 SPIB        | 10.94        |
| 50009.00 P19 | M-023096- Sp3 transcription factor                     | 6670.00 SP3         | 5.80         |
| 50009.00 P20 | M-010537- spleen focus forming virus (SFFV) proviral   | 6688.00 SPI1        | 8.76         |
| 50009.00 P21 | M-006562- Sp4 transcription factor                     | 6671.00 SP4         | 9.23         |
| 50009.00 P23 | M-020199- SAM pointed domain containing ets transi     | 25803.00 SPDEF      | 28.18        |
|              |                                                        | mdmdMAC             | 4.77         |
|              |                                                        | 3xMAD               |              |
|              |                                                        | MADc                |              |
| 50009.00 C22 |                                                        |                     | 21.10        |

|              |                                            |       |
|--------------|--------------------------------------------|-------|
| 50009.00 D22 |                                            | 24.85 |
| 50009.00 E22 |                                            | 29.36 |
| 50009.00 F22 |                                            | 34.40 |
|              | mn                                         | 27.43 |
|              | sd                                         | 5.74  |
| 50009.00 G22 |                                            | 6.14  |
| 50009.00 H22 |                                            | 3.99  |
| 50009.00 I22 |                                            | 7.85  |
| 50009.00 J22 |                                            | 2.14  |
|              |                                            | 5.03  |
|              |                                            | 2.49  |
| 50009.00 K03 | D-001600-(siGLO RISC-free siRNA            | 8.35  |
| 50009.00 L03 | D-001600-(siGLO RISC-free siRNA            | 20.79 |
| 50009.00 J03 | D-001206-(siControl non-targeting siRNA #2 | 3.49  |

| abs dev | robust Z | % inf | abs dev | robust Z | % inf | abs dev | robust Z |
|---------|----------|-------|---------|----------|-------|---------|----------|
| 9.44    | 3.03     | 0.80  | 3.75    | -1.18    | 10.00 | 5.13    | 1.34     |
| 3.59    | -1.15    | 0.83  | 3.72    | -1.17    | 0.98  | 3.89    | -1.02    |
| 2.47    | -0.79    | 1.55  | 3.00    | -0.95    | 2.84  | 2.03    | -0.53    |
| 1.39    | -0.45    | 0.77  | 3.78    | -1.19    | 3.92  | 0.95    | -0.25    |
| 1.94    | -0.62    | 1.17  | 3.38    | -1.07    | 0.67  | 4.20    | -1.10    |
| 0.80    | -0.26    | 0.54  | 4.01    | -1.26    | 1.37  | 3.50    | -0.92    |
| 0.71    | -0.23    | 2.49  | 2.06    | -0.64    | 2.36  | 2.51    | -0.66    |
| 1.57    | -0.51    | 0.90  | 3.65    | -1.15    | 1.77  | 3.10    | -0.81    |
| 1.43    | -0.46    | 2.50  | 2.05    | -0.64    | 1.84  | 3.03    | -0.79    |
| 1.17    | -0.38    | 0.23  | 4.32    | -1.36    | 1.70  | 3.17    | -0.83    |
| 1.84    | -0.59    | 0.72  | 3.83    | -1.21    | 1.85  | 3.02    | -0.79    |
| 2.11    | -0.68    | 1.36  | 3.19    | -1.00    | 3.59  | 1.28    | -0.34    |
| 5.27    | 1.69     | 8.19  | 3.64    | 1.18     | 4.12  | 0.75    | -0.20    |
| 1.32    | -0.43    | 1.64  | 2.91    | -0.91    | 2.95  | 1.92    | -0.50    |
| 1.65    | -0.53    | 1.79  | 2.76    | -0.87    | 0.94  | 3.93    | -1.03    |
| 1.76    | -0.57    | 1.07  | 3.48    | -1.10    | 0.75  | 4.12    | -1.08    |
| 1.78    | -0.57    | 2.07  | 2.48    | -0.78    | 2.92  | 1.95    | -0.51    |
| 1.01    | 0.32     | 6.94  | 2.39    | 0.78     | 2.68  | 2.19    | -0.57    |
| 1.37    | -0.44    | 5.57  | 1.02    | 0.34     | 2.80  | 2.07    | -0.54    |
| 8.19    | 2.62     | 6.67  | 2.12    | 0.69     | 0.00  | 4.87    | -1.27    |
| 8.84    | 2.83     | 0.90  | 3.65    | -1.15    | 3.79  | 1.08    | -0.28    |
| 3.07    | 0.98     | 2.96  | 1.59    | -0.49    | 5.75  | 0.88    | 0.23     |
| 2.11    | -0.68    | 7.73  | 3.18    | 1.03     | 9.99  | 5.12    | 1.33     |
| 2.98    | 0.95     | 4.61  | 0.06    | 0.03     | 4.88  | 0.01    | 0.00     |
| 2.41    | -0.77    | 2.02  | 2.53    | -0.79    | 3.12  | 1.75    | -0.46    |
| 2.83    | -0.91    | 3.70  | 0.85    | -0.26    | 1.27  | 3.60    | -0.94    |
| 2.93    | 0.94     | 3.26  | 1.29    | -0.40    | 3.03  | 1.84    | -0.48    |
| 3.82    | 1.22     | 4.18  | 0.37    | -0.11    | 5.27  | 0.40    | 0.10     |
| 2.85    | -0.91    | 2.25  | 2.30    | -0.72    | 0.57  | 4.30    | -1.13    |
| 2.20    | -0.71    | 6.94  | 2.39    | 0.78     | 2.84  | 2.03    | -0.53    |
| 1.44    | -0.46    | 3.49  | 1.06    | -0.32    | 3.75  | 1.12    | -0.29    |
| 3.61    | -1.16    | 1.25  | 3.30    | -1.04    | 0.79  | 4.08    | -1.07    |
| 3.91    | -1.26    | 0.56  | 3.99    | -1.26    | 0.93  | 3.94    | -1.03    |
| 3.44    | -1.11    | 2.78  | 1.77    | -0.55    | 1.58  | 3.29    | -0.86    |
| 1.44    | -0.47    | 2.64  | 1.91    | -0.60    | 1.07  | 3.80    | -0.99    |
| 3.69    | -1.19    | 0.66  | 3.89    | -1.23    | 2.99  | 1.88    | -0.49    |
| 4.14    | 1.33     | 6.78  | 2.23    | 0.73     | 3.28  | 1.59    | -0.42    |
| 2.88    | -0.92    | 1.69  | 2.86    | -0.90    | 0.11  | 4.76    | -1.24    |
| 3.30    | -1.06    | 3.64  | 0.91    | -0.28    | 0.83  | 4.04    | -1.06    |
| 6.53    | 2.09     | 4.06  | 0.49    | -0.14    | 0.94  | 3.93    | -1.03    |
| 3.88    | -1.25    | 6.09  | 1.54    | 0.51     | 2.51  | 2.36    | -0.62    |
| 3.80    | -1.22    | 2.18  | 2.37    | -0.74    | 5.16  | 0.29    | 0.07     |
| 2.35    | -0.76    | 5.12  | 0.57    | 0.20     | 2.68  | 2.19    | -0.57    |
| 3.18    | 1.02     | 13.63 | 9.08    | 2.91     | 7.47  | 2.60    | 0.68     |
| 3.50    | 1.12     | 3.18  | 1.37    | -0.42    | 1.41  | 3.46    | -0.91    |
| 0.37    | -0.12    | 3.97  | 0.58    | -0.17    | 1.77  | 3.10    | -0.81    |

|       |       |       |       |       |       |       |        |
|-------|-------|-------|-------|-------|-------|-------|--------|
| 1.52  | 0.49  | 7.23  | 2.68  | 0.87  | 3.22  | 1.65  | -0.43  |
| 0.76  | 0.24  | 6.37  | 1.82  | 0.59  | 1.65  | 3.22  | -0.84  |
| 2.62  | -0.84 | 5.04  | 0.49  | 0.17  | 2.03  | 2.84  | -0.74  |
| 1.52  | -0.49 | 2.07  | 2.48  | -0.78 | 3.03  | 1.84  | -0.48  |
| 2.06  | -0.66 | 6.76  | 2.21  | 0.72  | 3.24  | 1.63  | -0.43  |
| 0.86  | 0.27  | 3.49  | 1.06  | -0.32 | 3.49  | 1.38  | -0.36  |
| 0.91  | -0.29 | 3.60  | 0.95  | -0.29 | 3.13  | 1.75  | -0.46  |
| 2.00  | -0.64 | 1.88  | 2.67  | -0.84 | 2.07  | 2.80  | -0.73  |
| 2.67  | -0.86 | 3.67  | 0.88  | -0.27 | 2.39  | 2.48  | -0.65  |
| 1.27  | -0.41 | 2.86  | 1.69  | -0.52 | 1.63  | 3.24  | -0.85  |
| 1.53  | -0.49 | 2.92  | 1.63  | -0.51 | 2.37  | 2.50  | -0.65  |
| 2.26  | -0.73 | 2.67  | 1.88  | -0.59 | 2.72  | 2.15  | -0.56  |
| 0.52  | -0.17 | 4.11  | 0.44  | -0.13 | 4.85  | 0.02  | -0.01  |
| 0.30  | -0.10 | 5.00  | 0.45  | 0.16  | 2.81  | 2.06  | -0.54  |
| 0.52  | -0.17 | 0.78  | 3.77  | -1.19 | 2.74  | 2.13  | -0.56  |
| 1.32  | -0.42 | 6.41  | 1.86  | 0.61  | 5.21  | 0.34  | 0.09   |
| 3.10  | -1.00 | 3.14  | 1.41  | -0.44 | 2.84  | 2.03  | -0.53  |
| 3.81  | -1.22 | 3.50  | 1.05  | -0.32 | 1.38  | 3.49  | -0.91  |
| 0.58  | -0.19 | 3.91  | 0.64  | -0.19 | 3.68  | 1.19  | -0.31  |
| 2.33  | 0.74  | 4.83  | 0.28  | 0.10  | 4.63  | 0.24  | -0.07  |
| 0.01  | 0.00  | 5.42  | 0.87  | 0.29  | 4.72  | 0.15  | -0.04  |
| 2.68  | -0.86 | 2.42  | 2.13  | -0.67 | 2.97  | 1.90  | -0.50  |
| 4.23  | -1.36 | 1.56  | 3.00  | -0.94 | 2.43  | 2.44  | -0.64  |
| 1.14  | -0.37 | 4.78  | 0.23  | 0.09  | 9.41  | 4.54  | 1.18   |
| 2.88  | -0.92 | 1.90  | 2.65  | -0.83 | 7.42  | 2.55  | 0.66   |
| 2.54  | -0.82 | 3.52  | 1.03  | -0.31 | 1.84  | 3.03  | -0.79  |
| 1.31  | -0.42 | 1.46  | 3.09  | -0.97 | 2.23  | 2.64  | -0.69  |
| 1.03  | 0.33  | 5.26  | 0.71  | 0.24  | 6.21  | 1.34  | 0.35   |
| 1.27  | -0.41 | 1.89  | 2.66  | -0.84 | 2.65  | 2.22  | -0.58  |
| 2.48  | -0.80 | 3.58  | 0.97  | -0.30 | 2.41  | 2.46  | -0.64  |
| 0.69  | 0.22  | 3.81  | 0.74  | -0.22 | 5.23  | 0.36  | 0.09   |
| 5.59  | 1.79  | 8.63  | 4.08  | 1.32  | 12.79 | 7.92  | 2.06   |
| 5.95  | 1.91  | 11.46 | 6.91  | 2.22  | 15.97 | 11.10 | 2.89 y |
| 2.54  | 0.81  | 4.85  | 0.30  | 0.11  | 3.54  | 1.33  | -0.35  |
| 1.06  | 0.34  | 23.78 | 19.23 | 6.15  | 4.46  | 0.41  | -0.11  |
| 2.88  | -0.92 | 1.94  | 2.61  | -0.82 | 3.80  | 1.07  | -0.28  |
| 0.64  | -0.21 | 4.97  | 0.42  | 0.15  | 9.64  | 4.77  | 1.24   |
| 6.28  | 2.01  | 12.39 | 7.84  | 2.52  | 14.01 | 9.14  | 2.38 y |
| 6.03  | 1.93  | 6.24  | 1.69  | 0.55  | 12.03 | 7.16  | 1.86   |
| 2.22  | 0.71  | 5.19  | 0.64  | 0.22  | 6.04  | 1.17  | 0.30   |
| 11.68 | 3.75  | 12.72 | 8.17  | 2.62  | 8.80  | 3.93  | 1.02 y |
| 0.73  | -0.24 | 6.36  | 1.81  | 0.59  | 12.46 | 7.59  | 1.98   |
| 2.15  | 0.69  | 7.79  | 3.24  | 1.05  | 12.94 | 8.07  | 2.10   |
| 4.56  | 1.46  | 10.55 | 6.00  | 1.93  | 23.80 | 18.93 | 4.94   |
| 4.57  | 1.47  | 8.78  | 4.23  | 1.36  | 15.98 | 11.11 | 2.90   |
| 2.04  | -0.66 | 1.88  | 2.67  | -0.84 | 6.33  | 1.46  | 0.38   |
| 3.95  | 1.27  | 4.40  | 0.15  | -0.03 | 3.68  | 1.19  | -0.31  |

|       |       |       |       |       |       |       |        |
|-------|-------|-------|-------|-------|-------|-------|--------|
| 3.89  | -1.25 | 2.75  | 1.80  | -0.56 | 4.49  | 0.38  | -0.10  |
| 2.58  | -0.83 | 1.15  | 3.40  | -1.07 | 3.41  | 1.46  | -0.38  |
| 0.71  | 0.23  | 1.34  | 3.21  | -1.01 | 6.41  | 1.54  | 0.40   |
| 1.32  | 0.42  | 4.60  | 0.05  | 0.03  | 3.92  | 0.95  | -0.25  |
| 0.56  | -0.18 | 4.95  | 0.40  | 0.14  | 5.44  | 0.57  | 0.15   |
| 0.16  | 0.05  | 6.01  | 1.46  | 0.48  | 9.64  | 4.77  | 1.24   |
| 3.76  | -1.21 | 3.54  | 1.01  | -0.31 | 2.81  | 2.06  | -0.54  |
| 1.21  | -0.39 | 0.75  | 3.80  | -1.20 | 3.00  | 1.87  | -0.49  |
| 3.86  | -1.24 | 1.55  | 3.00  | -0.94 | 4.71  | 0.16  | -0.04  |
| 2.02  | -0.65 | 4.36  | 0.19  | -0.05 | 11.71 | 6.84  | 1.78   |
| 1.43  | -0.46 | 6.82  | 2.27  | 0.74  | 9.11  | 4.24  | 1.10   |
| 1.81  | -0.58 | 3.38  | 1.17  | -0.36 | 7.82  | 2.95  | 0.77   |
| 3.22  | -1.03 | 4.34  | 0.21  | -0.05 | 3.31  | 1.56  | -0.41  |
| 2.79  | -0.90 | 4.86  | 0.31  | 0.11  | 1.87  | 3.00  | -0.79  |
| 3.05  | -0.98 | 1.56  | 2.99  | -0.94 | 5.16  | 0.29  | 0.07   |
| 0.32  | -0.11 | 14.83 | 10.28 | 3.29  | 8.65  | 3.78  | 0.98   |
| 2.58  | 0.83  | 15.01 | 10.46 | 3.35  | 15.66 | 10.79 | 2.81 y |
| 1.30  | -0.42 | 4.99  | 0.44  | 0.16  | 5.38  | 0.51  | 0.13   |
| 3.85  | -1.24 | 0.77  | 3.78  | -1.19 | 1.47  | 3.40  | -0.89  |
| 1.19  | 0.38  | 1.11  | 3.44  | -1.08 | 2.35  | 2.52  | -0.66  |
| 0.84  | -0.27 | 2.09  | 2.46  | -0.77 | 5.59  | 0.72  | 0.19   |
| 2.01  | -0.65 | 1.78  | 2.77  | -0.87 | 2.65  | 2.22  | -0.58  |
| 0.29  | -0.09 | 6.41  | 1.86  | 0.61  | 1.80  | 3.07  | -0.80  |
| 3.26  | 1.04  | 7.18  | 2.63  | 0.85  | 8.47  | 3.60  | 0.94   |
| 0.07  | 0.02  | 1.31  | 3.24  | -1.02 | 1.83  | 3.04  | -0.80  |
| 2.58  | 0.83  | 6.75  | 2.20  | 0.72  | 6.53  | 1.66  | 0.43   |
| 2.62  | -0.84 | 3.18  | 1.37  | -0.42 | 2.28  | 2.59  | -0.68  |
| 0.91  | 0.29  | 4.41  | 0.14  | -0.03 | 3.48  | 1.39  | -0.37  |
| 1.64  | 0.53  | 8.17  | 3.62  | 1.17  | 7.37  | 2.50  | 0.65   |
| 0.79  | -0.26 | 10.72 | 6.17  | 1.98  | 9.48  | 4.61  | 1.20   |
| 1.50  | 0.48  | 6.81  | 2.26  | 0.73  | 12.32 | 7.45  | 1.94   |
| 1.58  | 0.51  | 3.52  | 1.03  | -0.31 | 3.25  | 1.62  | -0.43  |
| 10.91 | 3.50  | 37.24 | 32.69 | 10.45 | 26.73 | 21.86 | 5.70 y |
| 0.34  | -0.11 | 6.76  | 2.21  | 0.72  | 5.10  | 0.23  | 0.06   |
| 4.85  | 1.55  | 9.66  | 5.11  | 1.64  | 12.85 | 7.98  | 2.08   |
| 1.43  | -0.46 | 4.92  | 0.37  | 0.13  | 4.59  | 0.28  | -0.08  |
| 2.60  | 0.83  | 6.11  | 1.56  | 0.51  | 16.16 | 11.29 | 2.94   |
| 3.38  | 1.08  | 7.01  | 2.46  | 0.80  | 12.36 | 7.49  | 1.95   |
| 0.03  | -0.01 | 10.43 | 5.88  | 1.89  | 4.68  | 0.19  | -0.05  |
| 0.97  | -0.31 | 2.21  | 2.34  | -0.73 | 2.91  | 1.96  | -0.51  |
| 0.86  | -0.28 | 3.95  | 0.60  | -0.18 | 2.76  | 2.11  | -0.55  |
| 0.51  | 0.16  | 6.64  | 2.09  | 0.68  | 3.70  | 1.17  | -0.31  |
| 2.25  | 0.72  | 3.86  | 0.69  | -0.21 | 5.69  | 0.82  | 0.21   |
| 1.06  | -0.34 | 2.91  | 1.64  | -0.51 | 2.92  | 1.95  | -0.51  |
| 0.90  | 0.29  | 4.66  | 0.11  | 0.05  | 7.78  | 2.91  | 0.76   |
| 0.61  | 0.19  | 6.48  | 1.93  | 0.63  | 5.84  | 0.97  | 0.25   |
| 10.80 | 3.46  | 12.45 | 7.90  | 2.54  | 6.15  | 1.28  | 0.33 y |

|      |       |       |       |       |       |       |        |
|------|-------|-------|-------|-------|-------|-------|--------|
| 0.06 | -0.02 | 7.25  | 2.70  | 0.87  | 1.29  | 3.58  | -0.94  |
| 1.44 | -0.46 | 0.94  | 3.61  | -1.14 | 1.82  | 3.05  | -0.80  |
| 1.95 | 0.62  | 2.62  | 1.93  | -0.60 | 2.86  | 2.01  | -0.53  |
| 3.94 | 1.26  | 7.46  | 2.91  | 0.94  | 5.75  | 0.88  | 0.23   |
| 1.49 | -0.48 | 3.63  | 0.92  | -0.28 | 3.70  | 1.17  | -0.31  |
| 3.61 | 1.16  | 11.83 | 7.28  | 2.34  | 10.91 | 6.04  | 1.57   |
| 1.30 | -0.42 | 7.56  | 3.01  | 0.98  | 3.95  | 0.92  | -0.24  |
| 1.93 | 0.62  | 12.34 | 7.79  | 2.50  | 8.80  | 3.93  | 1.02   |
| 3.84 | 1.23  | 4.02  | 0.53  | -0.16 | 1.99  | 2.88  | -0.75  |
| 2.65 | -0.85 | 1.51  | 3.04  | -0.96 | 0.38  | 4.49  | -1.17  |
| 7.01 | 2.25  | 12.30 | 7.75  | 2.49  | 7.49  | 2.62  | 0.68 y |
| 9.96 | 3.19  | 9.01  | 4.46  | 1.44  | 10.38 | 5.51  | 1.44   |
| 1.61 | 0.51  | 7.42  | 2.87  | 0.93  | 9.97  | 5.10  | 1.33   |
| 0.04 | 0.01  | 5.44  | 0.89  | 0.30  | 1.53  | 3.34  | -0.87  |
| 6.50 | 2.08  | 3.06  | 1.49  | -0.46 | 3.35  | 1.52  | -0.40  |
| 0.67 | 0.21  | 3.66  | 0.89  | -0.27 | 2.50  | 2.37  | -0.62  |
| 0.60 | -0.19 | 3.19  | 1.36  | -0.42 | 3.34  | 1.53  | -0.40  |
| 0.11 | -0.04 | 2.29  | 2.26  | -0.71 | 1.40  | 3.47  | -0.91  |
| 7.37 | 2.36  | 16.69 | 12.14 | 3.89  | 10.01 | 5.14  | 1.34 y |
| 0.50 | -0.16 | 1.59  | 2.96  | -0.93 | 2.42  | 2.45  | -0.64  |
| 3.62 | 1.16  | 11.99 | 7.44  | 2.39  | 7.32  | 2.45  | 0.64   |
| 0.23 | -0.08 | 3.62  | 0.93  | -0.28 | 0.71  | 4.16  | -1.09  |
| 1.82 | 0.58  | 8.41  | 3.86  | 1.25  | 1.21  | 3.66  | -0.96  |
| 1.24 | -0.40 | 11.07 | 6.52  | 2.09  | 9.09  | 4.22  | 1.10   |
| 0.88 | -0.28 | 5.47  | 0.92  | 0.31  | 8.50  | 3.63  | 0.95   |
| 5.06 | 1.62  | 35.79 | 31.24 | 9.99  | 35.76 | 30.89 | 8.06 y |
| 1.51 | 0.48  | 15.76 | 11.21 | 3.59  | 17.34 | 12.47 | 3.25 y |
| 1.11 | -0.36 | 2.70  | 1.85  | -0.58 | 8.85  | 3.98  | 1.04   |
| 3.90 | 1.25  | 5.59  | 1.04  | 0.34  | 11.37 | 6.50  | 1.69   |
| 0.13 | 0.04  | 9.00  | 4.45  | 1.43  | 11.27 | 6.40  | 1.67   |
| 0.18 | 0.06  | 5.26  | 0.71  | 0.24  | 14.85 | 9.98  | 2.60   |
| 1.89 | -0.61 | 7.44  | 2.89  | 0.94  | 8.64  | 3.77  | 0.98   |
| 0.18 | 0.06  | 4.45  | 0.10  | -0.02 | 6.86  | 1.99  | 0.52   |
| 1.58 | -0.51 | 2.07  | 2.48  | -0.78 | 3.39  | 1.48  | -0.39  |
| 0.61 | -0.20 | 2.48  | 2.07  | -0.65 | 3.36  | 1.51  | -0.40  |
| 3.21 | 1.03  | 6.18  | 1.63  | 0.53  | 5.02  | 0.15  | 0.04   |
| 1.27 | 0.40  | 4.47  | 0.08  | -0.01 | 3.94  | 0.93  | -0.25  |
| 0.03 | 0.01  | 3.47  | 1.08  | -0.33 | 1.39  | 3.48  | -0.91  |
| 0.55 | -0.18 | 4.50  | 0.05  | 0.00  | 2.02  | 2.85  | -0.75  |
| 1.49 | 0.48  | 6.07  | 1.52  | 0.50  | 11.96 | 7.09  | 1.85   |
| 0.34 | 0.11  | 2.95  | 1.60  | -0.50 | 3.87  | 1.00  | -0.26  |
| 6.57 | 2.11  | 4.05  | 0.50  | -0.14 | 7.89  | 3.02  | 0.79   |
| 3.46 | 1.11  | 12.93 | 8.38  | 2.69  | 2.97  | 1.90  | -0.50  |
| 2.42 | 0.77  | 0.00  | 4.55  | -1.44 | 2.76  | 2.11  | -0.55  |
| 0.90 | -0.29 | 3.08  | 1.47  | -0.45 | 6.13  | 1.26  | 0.33   |
| 1.02 | -0.33 | 7.75  | 3.20  | 1.04  | 5.23  | 0.36  | 0.09   |
| 2.76 | -0.89 | 3.22  | 1.33  | -0.41 | 2.67  | 2.20  | -0.58  |



|      |       |       |       |       |       |       |        |
|------|-------|-------|-------|-------|-------|-------|--------|
| 0.23 | 0.07  | 4.84  | 0.29  | 0.11  | 6.19  | 1.32  | 0.34   |
| 3.93 | -1.26 | 4.15  | 0.40  | -0.11 | 1.26  | 3.61  | -0.94  |
| 1.64 | -0.53 | 6.07  | 1.52  | 0.50  | 7.68  | 2.81  | 0.73   |
| 0.41 | -0.13 | 18.44 | 13.89 | 4.45  | 14.97 | 10.10 | 2.63 y |
| 1.02 | 0.32  | 3.17  | 1.38  | -0.43 | 6.17  | 1.30  | 0.34   |
| 0.60 | -0.19 | 6.05  | 1.50  | 0.49  | 11.77 | 6.90  | 1.80   |
| 1.98 | -0.64 | 6.77  | 2.22  | 0.72  | 10.33 | 5.46  | 1.42   |
| 2.43 | -0.78 | 1.70  | 2.85  | -0.90 | 3.25  | 1.62  | -0.42  |
| 3.92 | -1.26 | 5.06  | 0.51  | 0.18  | 2.98  | 1.89  | -0.50  |
| 2.18 | -0.70 | 2.92  | 1.63  | -0.51 | 2.92  | 1.95  | -0.51  |
| 2.43 | -0.78 | 2.41  | 2.14  | -0.67 | 4.52  | 0.35  | -0.09  |
| 0.98 | -0.32 | 5.36  | 0.81  | 0.27  | 1.50  | 3.37  | -0.88  |
| 0.20 | -0.07 | 5.12  | 0.57  | 0.20  | 4.37  | 0.50  | -0.13  |
| 2.89 | 0.92  | 5.72  | 1.17  | 0.39  | 10.44 | 5.57  | 1.45   |
| 0.52 | 0.16  | 8.50  | 3.95  | 1.27  | 8.28  | 3.41  | 0.89   |
| 5.08 | 1.63  | 5.16  | 0.61  | 0.21  | 0.00  | 4.87  | -1.27  |
| 0.08 | -0.03 | 7.49  | 2.94  | 0.95  | 4.95  | 0.08  | 0.02   |
| 0.78 | -0.25 | 4.40  | 0.15  | -0.03 | 10.06 | 5.19  | 1.35   |
| 0.74 | -0.24 | 9.78  | 5.23  | 1.68  | 12.32 | 7.45  | 1.94   |
| 2.68 | -0.86 | 8.67  | 4.12  | 1.33  | 11.80 | 6.93  | 1.81   |
| 0.91 | 0.29  | 12.35 | 7.80  | 2.50  | 16.26 | 11.39 | 2.97 y |
| 2.31 | -0.74 | 6.10  | 1.55  | 0.51  | 11.26 | 6.39  | 1.66   |
| 2.10 | -0.68 | 5.67  | 1.12  | 0.37  | 10.90 | 6.03  | 1.57   |
| 3.67 | -1.18 | 5.21  | 0.66  | 0.22  | 8.60  | 3.73  | 0.97   |
| 2.91 | -0.93 | 3.01  | 1.54  | -0.48 | 7.56  | 2.69  | 0.70   |
| 1.55 | -0.50 | 2.53  | 2.02  | -0.63 | 7.17  | 2.30  | 0.60   |
| 3.97 | -1.27 | 2.20  | 2.35  | -0.74 | 5.98  | 1.11  | 0.29   |
| 2.58 | -0.83 | 2.65  | 1.90  | -0.59 | 1.29  | 3.58  | -0.94  |
| 2.94 | -0.94 | 3.60  | 0.95  | -0.29 | 2.44  | 2.43  | -0.64  |
| 3.23 | -1.04 | 4.59  | 0.04  | 0.03  | 3.31  | 1.56  | -0.41  |
| 2.56 | -0.82 | 3.41  | 1.14  | -0.35 | 2.20  | 2.67  | -0.70  |
| 2.62 | -0.84 | 7.00  | 2.45  | 0.80  | 6.64  | 1.77  | 0.46   |
| 0.70 | 0.22  | 8.59  | 4.04  | 1.30  | 12.28 | 7.41  | 1.93   |
| 3.02 | -0.97 | 3.84  | 0.71  | -0.21 | 4.57  | 0.30  | -0.08  |
| 3.52 | -1.13 | 2.30  | 2.25  | -0.70 | 1.29  | 3.58  | -0.94  |
| 3.68 | -1.18 | 6.64  | 2.09  | 0.68  | 0.57  | 4.30  | -1.12  |
| 3.30 | -1.06 | 4.05  | 0.50  | -0.15 | 4.38  | 0.49  | -0.13  |
| 3.90 | 1.25  | 11.02 | 6.47  | 2.08  | 11.18 | 6.31  | 1.64   |
| 2.29 | -0.74 | 3.64  | 0.91  | -0.28 | 8.28  | 3.41  | 0.89   |
| 2.81 | -0.90 | 4.64  | 0.09  | 0.04  | 6.92  | 2.05  | 0.53   |
| 9.06 | 2.90  | 15.01 | 10.46 | 3.35  | 21.39 | 16.52 | 4.31 y |
| 3.03 | -0.97 | 1.47  | 3.08  | -0.97 | 2.84  | 2.03  | -0.53  |
| 0.95 | 0.30  | 3.31  | 1.24  | -0.38 | 7.12  | 2.25  | 0.59   |
| 2.65 | 0.85  | 7.29  | 2.74  | 0.89  | 12.17 | 7.30  | 1.90   |
| 4.27 | 1.37  | 8.02  | 3.47  | 1.12  | 15.73 | 10.86 | 2.83   |
| 0.55 | -0.18 | 7.07  | 2.52  | 0.82  | 6.69  | 1.82  | 0.47   |
| 2.52 | 0.81  | 4.72  | 0.17  | 0.07  | 3.81  | 1.06  | -0.28  |

|       |       |       |       |       |       |       |        |
|-------|-------|-------|-------|-------|-------|-------|--------|
| 1.22  | -0.39 | 4.41  | 0.14  | -0.03 | 4.92  | 0.05  | 0.01   |
| 2.67  | -0.86 | 1.78  | 2.77  | -0.87 | 1.53  | 3.34  | -0.87  |
| 2.99  | -0.96 | 5.14  | 0.59  | 0.20  | 2.87  | 2.00  | -0.52  |
| 1.16  | -0.37 | 2.97  | 1.59  | -0.49 | 2.30  | 2.57  | -0.67  |
| 2.05  | -0.66 | 4.13  | 0.42  | -0.12 | 5.54  | 0.67  | 0.17   |
| 0.76  | -0.25 | 2.35  | 2.20  | -0.69 | 3.62  | 1.25  | -0.33  |
| 0.00  | 0.00  | 1.63  | 2.92  | -0.92 | 3.96  | 0.91  | -0.24  |
| 0.63  | 0.20  | 4.01  | 0.54  | -0.16 | 6.87  | 2.00  | 0.52   |
| 7.64  | 2.45  | 10.16 | 5.61  | 1.81  | 0.75  | 4.12  | -1.08  |
| 0.04  | -0.01 | 5.34  | 0.79  | 0.27  | 8.47  | 3.60  | 0.94   |
| 0.02  | 0.00  | 3.23  | 1.32  | -0.41 | 6.16  | 1.29  | 0.33   |
| 0.68  | -0.22 | 6.80  | 2.25  | 0.73  | 13.15 | 8.28  | 2.16   |
| 2.99  | 0.96  | 11.17 | 6.62  | 2.13  | 25.36 | 20.49 | 5.34 y |
| 1.37  | 0.44  | 4.35  | 0.20  | -0.05 | 9.15  | 4.28  | 1.11   |
| 2.72  | 0.87  | 4.98  | 0.43  | 0.15  | 17.82 | 12.95 | 3.38   |
| 4.14  | 1.33  | 5.13  | 0.58  | 0.20  | 9.84  | 4.97  | 1.29   |
| 1.41  | 0.45  | 5.16  | 0.61  | 0.21  | 15.27 | 10.40 | 2.71   |
| 1.34  | 0.43  | 8.24  | 3.69  | 1.19  | 16.70 | 11.83 | 3.08   |
| 3.09  | 0.99  | 6.18  | 1.63  | 0.53  | 8.59  | 3.72  | 0.97   |
| 10.99 | 3.52  | 29.81 | 25.26 | 8.08  | 26.78 | 21.91 | 5.71 y |
| 1.00  | 0.32  | 5.56  | 1.01  | 0.33  | 7.45  | 2.58  | 0.67   |
| 5.05  | 1.62  | 3.88  | 0.67  | -0.20 | 4.96  | 0.09  | 0.02   |
| 0.54  | 0.17  | 4.21  | 0.34  | -0.09 | 5.93  | 1.06  | 0.27   |
| 0.38  | 0.12  | 5.45  | 0.90  | 0.30  | 7.26  | 2.39  | 0.62   |
| 1.01  | 0.32  | 4.32  | 0.23  | -0.06 | 1.83  | 3.04  | -0.80  |
| 1.08  | 0.34  | 3.29  | 1.26  | -0.39 | 11.47 | 6.60  | 1.72   |
| 1.95  | -0.63 | 2.00  | 2.55  | -0.80 | 2.03  | 2.84  | -0.74  |
| 5.16  | 1.65  | 4.36  | 0.19  | -0.05 | 5.50  | 0.63  | 0.16   |
| 1.15  | 0.37  | 18.31 | 13.76 | 4.41  | 3.53  | 1.34  | -0.35  |
| 0.43  | 0.14  | 4.96  | 0.41  | 0.14  | 0.85  | 4.02  | -1.05  |
| 1.36  | -0.44 | 6.81  | 2.26  | 0.73  | 6.19  | 1.32  | 0.34   |
| 10.43 | 3.34  | 15.94 | 11.39 | 3.65  | 25.88 | 21.01 | 5.48 y |
| 7.71  | 2.47  | 7.92  | 3.37  | 1.09  | 11.63 | 6.76  | 1.76   |
| 2.83  | 0.91  | 9.69  | 5.14  | 1.65  | 10.55 | 5.68  | 1.48   |
| 1.01  | 0.32  | 4.99  | 0.44  | 0.15  | 3.82  | 1.05  | -0.28  |
| 1.79  | 0.57  | 2.35  | 2.20  | -0.69 | 6.48  | 1.61  | 0.42   |
| 0.55  | 0.18  | 6.02  | 1.47  | 0.48  | 6.90  | 2.03  | 0.53   |
| 1.88  | -0.60 | 5.21  | 0.66  | 0.22  | 1.43  | 3.44  | -0.90  |
| 2.16  | 0.69  | 2.41  | 2.14  | -0.67 | 8.75  | 3.88  | 1.01   |
| 8.82  | 2.83  | 3.97  | 0.58  | -0.17 | 8.50  | 3.63  | 0.95   |
| 1.21  | 0.39  | 1.98  | 2.57  | -0.81 | 4.71  | 0.16  | -0.04  |
| 1.37  | 0.44  | 3.63  | 0.92  | -0.28 | 2.31  | 2.56  | -0.67  |
| 1.92  | 0.62  | 5.63  | 1.08  | 0.36  | 5.16  | 0.29  | 0.07   |
| 2.46  | 0.79  | 4.14  | 0.41  | -0.12 | 6.23  | 1.36  | 0.35   |
| 3.03  | -0.98 | 2.34  | 2.21  | -0.69 | 2.11  | 2.76  | -0.72  |
| 5.20  | 1.67  | 12.28 | 7.73  | 2.48  | 1.75  | 3.12  | -0.82  |
| 2.58  | 0.83  | 3.12  | 1.43  | -0.44 | 8.15  | 3.28  | 0.85   |

|       |       |       |       |       |       |       |         |
|-------|-------|-------|-------|-------|-------|-------|---------|
| 6.52  | 2.09  | 6.49  | 1.94  | 0.63  | 8.01  | 3.14  | 0.82    |
| 3.74  | 1.20  | 7.79  | 3.24  | 1.05  | 0.00  | 4.87  | -1.27   |
| 2.85  | 0.91  | 14.14 | 9.59  | 3.08  | 8.11  | 3.24  | 0.84    |
| 0.07  | 0.02  | 5.80  | 1.25  | 0.41  | 5.95  | 1.08  | 0.28    |
| 3.13  | -1.00 | 6.91  | 2.36  | 0.77  | 11.47 | 6.60  | 1.72    |
| 0.75  | -0.24 | 6.96  | 2.41  | 0.78  | 22.03 | 17.16 | 4.47    |
| 0.55  | 0.18  | 2.13  | 2.42  | -0.76 | 7.70  | 2.83  | 0.74    |
| 0.75  | 0.24  | 1.97  | 2.58  | -0.81 | 5.91  | 1.04  | 0.27    |
| 1.87  | 0.60  | 10.67 | 6.12  | 1.97  | 10.94 | 6.07  | 1.58    |
| 0.34  | -0.11 | 7.45  | 2.90  | 0.94  | 6.47  | 1.60  | 0.41    |
| 4.95  | 1.59  | 8.22  | 3.67  | 1.19  | 9.65  | 4.78  | 1.24    |
| 3.07  | 0.98  | 5.06  | 0.51  | 0.18  | 9.67  | 4.80  | 1.25    |
| 2.37  | 0.76  | 4.13  | 0.42  | -0.12 | 6.16  | 1.29  | 0.34    |
| 1.26  | 0.40  | 8.92  | 4.37  | 1.41  | 3.68  | 1.19  | -0.31   |
| 5.24  | 1.68  | 6.40  | 1.85  | 0.60  | 8.14  | 3.27  | 0.85    |
| 11.36 | 3.64  | 8.47  | 3.92  | 1.27  | 4.16  | 0.71  | -0.19   |
| 7.21  | 2.31  | 10.65 | 6.10  | 1.96  | 4.39  | 0.48  | -0.13   |
| 1.45  | 0.46  | 10.57 | 6.02  | 1.93  | 1.77  | 3.10  | -0.81   |
| 2.23  | -0.72 | 0.92  | 3.63  | -1.14 | 4.90  | 0.03  | 0.01    |
| 1.32  | -0.42 | 3.58  | 0.97  | -0.30 | 6.52  | 1.65  | 0.43    |
| 2.79  | -0.90 | 2.78  | 1.77  | -0.55 | 5.35  | 0.48  | 0.12    |
| 10.59 | 3.39  | 15.83 | 11.28 | 3.61  | 2.00  | 2.87  | -0.75 x |
| 11.21 | 3.59  | 5.81  | 1.26  | 0.42  | 5.56  | 0.69  | 0.18    |
| 0.56  | -0.18 | 0.95  | 3.60  | -1.14 | 1.69  | 3.18  | -0.83   |
| 2.52  | 0.81  | 4.51  | 0.04  | 0.00  | 7.93  | 3.06  | 0.79    |
| 0.40  | -0.13 | 3.36  | 1.19  | -0.36 | 13.92 | 9.05  | 2.36    |
| 3.29  | 1.05  | 1.18  | 3.37  | -1.06 | 8.53  | 3.66  | 0.95    |
| 2.49  | 0.80  | 3.07  | 1.48  | -0.46 | 5.26  | 0.39  | 0.10    |
| 2.82  | 0.90  | 2.17  | 2.38  | -0.75 | 7.05  | 2.18  | 0.57    |
| 2.65  | 0.85  | 2.12  | 2.43  | -0.76 | 5.55  | 0.68  | 0.17    |
| 0.45  | 0.14  | 1.31  | 3.24  | -1.02 | 3.00  | 1.87  | -0.49   |
| 4.54  | 1.45  | 4.91  | 0.36  | 0.13  | 7.03  | 2.16  | 0.56    |
| 8.36  | 2.68  | 5.73  | 1.18  | 0.39  | 17.98 | 13.11 | 3.42 y  |
| 6.59  | 2.11  | 6.88  | 2.33  | 0.76  | 11.37 | 6.50  | 1.69    |
| 1.83  | 0.59  | 9.35  | 4.80  | 1.55  | 4.15  | 0.72  | -0.19   |
| 14.21 | 4.56  | 9.58  | 5.03  | 1.62  | 2.16  | 2.71  | -0.71   |
| 7.17  | 2.30  | 11.24 | 6.69  | 2.15  | 11.15 | 6.28  | 1.64 x  |
| 6.18  | 1.98  | 9.56  | 5.01  | 1.61  | 2.30  | 2.57  | -0.67   |
| 1.04  | 0.33  | 3.68  | 0.87  | -0.26 | 7.71  | 2.84  | 0.74    |
| 4.00  | 1.28  | 5.00  | 0.45  | 0.16  | 11.85 | 6.98  | 1.82    |
| 4.47  | 1.43  | 3.24  | 1.31  | -0.40 | 4.85  | 0.02  | -0.01   |
| 23.42 | 7.51  | 0.00  | 4.55  | -1.44 | 7.25  | 2.38  | 0.62    |
| 2.11  |       | 4.51  | 2.12  |       | 4.88  | 2.59  |         |
| 6.32  |       |       | 6.35  |       |       | 7.77  |         |
| 3.12  |       |       | 3.13  |       |       | 3.83  |         |

**Z 9 new analyses**

29.88

25.48

A

B

C

|       |       |           |       |       |       |
|-------|-------|-----------|-------|-------|-------|
| 20.29 | 32.48 | 3psSD     | 17.23 | 17.63 | 8.64  |
| 33.06 | 28.26 | 3ngSD     | 7.46  | 5.29  | 5.17  |
| 32.24 | 28.89 | SumSD     | 24.70 | 22.92 | 13.82 |
| 28.87 | 28.78 | DiffMn    | 22.40 | 25.39 | 26.25 |
| 5.88  | 2.88  | SmovrDiff | 1.10  | 0.90  | 0.53  |
|       |       | 1minus    | -0.10 | 0.10  | 0.47  |

|      |      |
|------|------|
| 3.06 | 0.56 |
| 3.69 | 1.76 |
| 1.45 | 4.50 |
| 5.71 | 3.29 |
| 3.48 | 2.53 |
| 1.76 | 1.72 |

|       |       |
|-------|-------|
| 20.49 | 21.49 |
| 18.68 | 20.39 |

|      |      |      |      |      |
|------|------|------|------|------|
| 1.27 | 4.92 | 0.37 | 4.24 | 0.63 |
|------|------|------|------|------|

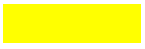













toxic a,b,c

toxic a,b,c

|          |            |                                     |                    | <b>% inf</b> | <b>abs dev</b> | <b>robust Z</b> |
|----------|------------|-------------------------------------|--------------------|--------------|----------------|-----------------|
| 50010.00 | A02        | M-009464- branched chain ket        | 594.00 BCKDHB      | 1.43         | 1.38           | -0.69           |
| 50010.00 | A04        | M-012563- branched chain ket        | 593.00 BCKDHA      | 0.13         | 2.68           | -1.33           |
| 50010.00 | A05        | M-003330- tumor protein p73         | 8626.00 TP73L      | 1.05         | 1.76           | -0.87           |
| 50010.00 | A06        | M-020191- branched chain am         | 587.00 BCAT2       | 0.61         | 2.20           | -1.09           |
| 50010.00 | A07        | M-013313- transcriptional regi      | 55809.00 TRERF1    | 0.41         | 2.40           | -1.19           |
| 50010.00 | A08        | M-012084- branched chain am         | 586.00 BCAT1       | 1.07         | 1.74           | -0.86           |
| 50010.00 | A09        | M-012684- thyroid hormone r         | 9321.00 TRIP11     | 1.69         | 1.12           | -0.55           |
| 50010.00 | A10        | M-008251- bile acid Coenzyme        | 570.00 BAAT        | 0.43         | 2.38           | -1.18           |
| 50010.00 | A11        | M-009644- trichorhinophalang        | 7227.00 TRPS1      | 1.57         | 1.24           | -0.62           |
| 50010.00 | A12        | M-012387- xylosylprotein beta       | 11285.00 B4GALT7   | 0.78         | 2.03           | -1.01           |
| 50010.00 | A13        | M-018340- TSC22 domain fam          | 8848.00 TSC22D1    | 1.46         | 1.35           | -0.67           |
| 50010.00 | A14        | M-012965- UDP-Gal:betaGlcN          | 2683.00 B4GALT1    | 1.10         | 1.71           | -0.85           |
| 50010.00 | A15        | M-012378- transcription termi       | 7270.00 TTF1       | 1.82         | 0.99           | -0.49           |
| 50010.00 | A16        | M-009034- UDP-GlcNAc:betaG          | 10331.00 B3GNT3    | 1.35         | 1.46           | -0.72           |
| 50010.00 | A17        | M-012862- twist homolog 2 (D        | 117581.00 TWIST2   | 1.29         | 1.52           | -0.76           |
| 50010.00 | A18        | M-013932- autism susceptibili       | 26053.00 AUTS2     | 1.92         | 0.89           | -0.44           |
| 50010.00 | A19        | M-020551- zinc finger and BTB       | 27033.00 ZBTB32    | 3.01         | 0.20           | 0.10            |
| 50010.00 | A20        | M-011930- ATPase, H+ transp         | 9296.00 ATP6V1F    | 1.23         | 1.58           | -0.78           |
| 50010.00 | A21        | M-020670- upstream binding t        | 7343.00 UBTF       | 5.41         | 2.60           | 1.29            |
| 50010.00 | A23        | M-003617- upstream transcrip        | 7391.00 USF1       | 8.14         | <b>5.33</b>    | <b>2.64</b>     |
| 50010.00 | B02        | M-004253- glyceraldehyde-3-p        | 2597.00 GAPDH      | 4.46         | 1.65           | 0.82            |
| 50010.00 | B04        | M-017204- guanidinoacetate M        | 2593.00 GAMT       | 3.18         | 0.37           | 0.18            |
| 50010.00 | B05        | M-008643- 3-hydroxybutyrate         | 622.00 BDH1        | 2.27         | 0.54           | -0.27           |
| 50010.00 | B06        | M-010327- galactose-1-phospl        | 2592.00 GALT       | 5.81         | 3.00           | 1.49            |
| 50010.00 | B07        | M-005792- complement factor         | 629.00 CFB         | 2.82         | 0.01           | 0.00            |
| 50010.00 | B08        | M-008341- galactosamine (N-a        | 2588.00 GALNS      | 1.40         | 1.41           | -0.70           |
| 50010.00 | B09        | M-008422- betaine-homocyste         | 635.00 BHMT        | 1.93         | 0.88           | -0.44           |
| 50010.00 | B10        | M-011279- beta-1,4-N-acetyl-g       | 2583.00 B4GALNT1   | 3.77         | 0.96           | 0.48            |
| 50010.00 | B11        | M-003862- biliverdin reductas       | 644.00 BLVRA       | 4.26         | 1.45           | 0.72            |
| 50010.00 | B12        | M-009904- UDP-galactose-4-ep        | 2582.00 GALE       | 3.39         | 0.58           | 0.29            |
| 50010.00 | B13        | M-008262- biphenyl hydrolase        | 670.00 BPHL        | 0.90         | 1.91           | -0.95           |
| 50010.00 | B14        | M-011038- galactosylceramid         | 2581.00 GALC       | 7.44         | <b>4.63</b>    | <b>2.30</b>     |
| 50010.00 | B15        | M-010210- brain and reproduc        | 9577.00 BRE        | 0.81         | 2.00           | -0.99           |
| 50010.00 | B16        | M-010121- glutamate decarbo         | 2571.00 GAD1       | 1.89         | 0.92           | -0.46           |
| 50010.00 | B17        | M-005797- complement comp           | 717.00 C2          | 1.40         | 1.41           | -0.70           |
| 50010.00 | B18        | M-008181- glucose-6-phospha         | 2539.00 G6PD       | 2.84         | 0.03           | 0.02            |
| 50010.00 | B19        | M-018195- haloacid dehaloger        | 81932.00 HDHD3     | 3.37         | 0.56           | 0.28            |
| 50010.00 | B20        | M-011037- glucose-6-phospha         | 2538.00 G6PC       | 3.36         | 0.55           | 0.27            |
| 50010.00 | B21        | M-008926- acyl-CoA thioester:       | 134526.00 ACOT12   | 6.45         | 3.64           | 1.81            |
| 50010.00 | B23        | M-017896- calcium/calmodulii        | 55450.00 CAMK2N1   | 5.32         | 2.51           | 1.25            |
| 50010.00 | C02        | M-013221- ATPase, H+ transp         | 51382.00 ATP6V1D   | 1.27         | 1.54           | -0.77           |
| 50010.00 | C04        | M-017536- ATP synthase, H+ t        | 522.00 ATP5J       | 7.08         | <b>4.27</b>    | <b>2.12</b>     |
| 50010.00 | C05        | M-003618- upstream transcrip        | 7392.00 USF2       | 3.87         | 1.06           | 0.52            |
| 50010.00 | <b>C06</b> | <b>M-008292- 5-aminoimidazole-</b>  | <b>471.00 ATIC</b> | <b>8.59</b>  | <b>5.78</b>    | <b>2.87</b>     |
| 50010.00 | C07        | M-019550- undifferentiated er       | 8433.00 UTF1       | 2.14         | 0.67           | -0.33           |
| 50010.00 | <b>C08</b> | <b>M-009713- aspartoacylase (Ca</b> | <b>443.00 ASPA</b> | <b>10.38</b> | <b>7.57</b>    | <b>3.76</b>     |

|          |     |                                 |          |         |      |      |       |
|----------|-----|---------------------------------|----------|---------|------|------|-------|
| 50010.00 | C09 | M-012486- ventral anterior ho   | 25806.00 | VAX2    | 1.63 | 1.18 | -0.59 |
| 50010.00 | C10 | M-009377- asparagine synthet    | 440.00   | ASNS    | 1.88 | 0.93 | -0.46 |
| 50010.00 | C11 | M-012531- VENT homeobox h       | 27287.00 | VENTX   | 1.74 | 1.07 | -0.53 |
| 50010.00 | C12 | M-005228- N-acylsphingosine     | 427.00   | ASAH1   | 2.66 | 0.15 | -0.08 |
| 50010.00 | C13 | M-016654- visual system hom     | 30813.00 | VSX1    | 2.74 | 0.07 | -0.04 |
| 50010.00 | C14 | M-008564- ADP-ribosyltransfe    | 419.00   | ART3    | 3.80 | 0.99 | 0.49  |
| 50010.00 | C15 | M-009101- Wilms tumor 1         | 7490.00  | WT1     | 3.40 | 0.59 | 0.29  |
| 50010.00 | C16 | M-010387- ADP-ribosyltransfe    | 417.00   | ART1    | 3.11 | 0.30 | 0.15  |
| 50010.00 | C17 | M-011796- YY1 transcription fi  | 7528.00  | YY1     | 4.33 | 1.52 | 0.76  |
| 50010.00 | C18 | M-008240- acyloxyacyl hydrok    | 313.00   | AOAH    | 2.47 | 0.34 | -0.17 |
| 50010.00 | C19 | M-011816- zinc finger protein   | 677.00   | ZFP36L1 | 2.73 | 0.08 | -0.04 |
| 50010.00 | C20 | M-012534- aminomethyltransf     | 275.00   | AMT     | 4.82 | 2.01 | 1.00  |
| 50010.00 | C21 | M-019768- zinc finger protein   | 7539.00  | ZFP37   | 1.94 | 0.87 | -0.43 |
| 50010.00 | C23 | M-020934- zinc finger and BTB   | 51043.00 | ZBTB7B  | 2.51 | 0.30 | -0.15 |
| 50010.00 | D02 | M-017391- FXVD domain conta     | 486.00   | FXVD2   | 2.07 | 0.74 | -0.37 |
| 50010.00 | D04 | M-009936- follicular lymphom    | 2531.00  | FVT1    | 3.27 | 0.46 | 0.23  |
| 50010.00 | D05 | M-005800- calpain 10            | 11132.00 | CAPN10  | 2.76 | 0.05 | -0.02 |
| 50010.00 | D06 | M-003668- fucosyltransferase    | 2530.00  | FUT8    | 1.32 | 1.49 | -0.74 |
| 50010.00 | D07 | M-004403- caspase 14, apoptc    | 23581.00 | CASP14  | 8.22 | 5.41 | 2.69  |
| 50010.00 | D08 | M-008171- fucosyltransferase    | 2528.00  | FUT6    | 1.59 | 1.22 | -0.60 |
| 50010.00 | D09 | M-004307- caspase 3, apoptos    | 836.00   | CASP3   | 2.86 | 0.05 | 0.03  |
| 50010.00 | D10 | M-008992- fucosyltransferase    | 2524.00  | FUT2    | 1.84 | 0.97 | -0.48 |
| 50010.00 | D11 | M-004406- caspase 6, apoptos    | 839.00   | CASP6   | 3.73 | 0.92 | 0.46  |
| 50010.00 | D12 | M-008960- fucosyltransferase    | 2523.00  | FUT1    | 1.05 | 1.76 | -0.88 |
| 50010.00 | D13 | M-004407- caspase 7, apoptos    | 840.00   | CASP7   | 2.30 | 0.51 | -0.25 |
| 50010.00 | D14 | M-005882- furin (paired basic   | 5045.00  | FURIN   | 1.55 | 1.26 | -0.62 |
| 50010.00 | D15 | M-008617- cystathionine-beta    | 875.00   | CBS     | 1.18 | 1.63 | -0.81 |
| 50010.00 | D16 | M-009023- fucosidase, alpha-L   | 2517.00  | FUCA1   | 0.78 | 2.03 | -1.01 |
| 50010.00 | D17 | M-009222- CD38 molecule         | 952.00   | CD38    | 0.63 | 2.18 | -1.08 |
| 50010.00 | D18 | M-012451- FtsJ homolog 1 (E.    | 24140.00 | FTSJ1   | 0.78 | 2.03 | -1.01 |
| 50010.00 | D19 | M-009523- cell division cycle 2 | 8697.00  | CDC23   | 6.69 | 3.88 | 1.93  |
| 50010.00 | D20 | M-008768- AKT interacting prc   | 64400.00 | AKTIP   | 1.78 | 1.03 | -0.51 |
| 50010.00 | D21 | M-009051- carboxylesterase 1    | 1066.00  | CES1    | 4.57 | 1.76 | 0.87  |
| 50010.00 | D23 | M-009617- carboxylesterase 4    | 51716.00 | CES4    | 2.30 | 0.51 | -0.25 |
| 50010.00 | E02 | M-010174- adenosine monoph      | 272.00   | AMPD3   | 2.64 | 0.17 | -0.08 |
| 50010.00 | E04 | M-004443- apoptosis-inducing    | 84883.00 | AIFM2   | 3.89 | 1.08 | 0.54  |
| 50010.00 | E05 | M-013583- zinc finger with KR   | 23660.00 | ZKSCAN5 | 4.06 | 1.25 | 0.62  |
| 50010.00 | E06 | M-009460- alpha-methylacyl-C    | 23600.00 | AMACR   | 4.25 | 1.44 | 0.72  |
| 50010.00 | E07 | M-006572- zinc finger protein,  | 7543.00  | ZFX     | 3.88 | 1.07 | 0.53  |
| 50010.00 | E08 | M-027144- asparagine-linked g   | 10195.00 | ALG3    | 3.22 | 0.41 | 0.21  |
| 50010.00 | E09 | M-006573- zinc finger protein,  | 7544.00  | ZFY     | 6.49 | 3.68 | 1.83  |
| 50010.00 | E10 | M-019473- myo-inositol oxyge    | 55586.00 | MIOX    | 0.81 | 2.00 | -0.99 |
| 50010.00 | E11 | M-018011- zinc fingers and ho   | 11244.00 | ZHX1    | 3.43 | 0.62 | 0.31  |
| 50010.00 | E12 | M-010376- aldolase A, fructos   | 226.00   | ALDOA   | 3.13 | 0.32 | 0.16  |
| 50010.00 | E13 | M-017676- zinc fingers and ho   | 22882.00 | ZHX2    | 2.11 | 0.70 | -0.35 |
| 50010.00 | E14 | M-008715- aldehyde dehydrog     | 501.00   | ALDH7A1 | 4.14 | 1.33 | 0.66  |
| 50010.00 | E15 | M-011798- Zic family member     | 7545.00  | ZIC1    | 6.44 | 3.63 | 1.80  |

|          |     |                               |          |          |       |      |       |
|----------|-----|-------------------------------|----------|----------|-------|------|-------|
| 50010.00 | E16 | M-004044- aldehyde dehydrog   | 4329.00  | ALDH6A1  | 3.93  | 1.12 | 0.56  |
| 50010.00 | E17 | M-006583- zinc finger protein | 7695.00  | ZNF136   | 1.00  | 1.81 | -0.90 |
| 50010.00 | E18 | M-009793- aldehyde dehydrog   | 7915.00  | ALDH5A1  | 1.14  | 1.67 | -0.83 |
| 50010.00 | E19 | M-013965- zinc finger protein | 7702.00  | ZNF143   | 4.13  | 1.32 | 0.66  |
| 50010.00 | E20 | M-008120- aldehyde dehydrog   | 8659.00  | ALDH4A1  | 4.75  | 1.94 | 0.96  |
| 50010.00 | E21 | M-018719- zinc finger and BTB | 7704.00  | ZBTB16   | 1.23  | 1.58 | -0.78 |
| 50010.00 | E23 | M-012658- zinc finger protein | 7707.00  | ZNF148   | 2.67  | 0.14 | -0.07 |
| 50010.00 | F02 | M-005881- folate hydrolase (p | 2346.00  | FOLH1    | 1.73  | 1.08 | -0.53 |
| 50010.00 | F04 | M-010093- farnesyltransferase | 2342.00  | FNTB     | 3.75  | 0.94 | 0.47  |
| 50010.00 | F05 | M-031939- fumarylacetoaceta   | 51011.00 | FAHD2A   | 1.92  | 0.89 | -0.44 |
| 50010.00 | F06 | M-008807- farnesyltransferase | 2339.00  | FNTA     | 1.33  | 1.48 | -0.73 |
| 50010.00 | F07 | M-008651- amidohydrolase dc   | 51005.00 | AMDHD2   | 7.59  | 4.78 | 2.37  |
| 50010.00 | F08 | M-008136- flavin containing m | 2330.00  | FMO5     | 2.65  | 0.16 | -0.08 |
| 50010.00 | F09 | M-009378- choline acetyltrans | 1103.00  | CHAT     | 5.32  | 2.51 | 1.25  |
| 50010.00 | F10 | M-009418- flavin containing m | 2329.00  | FMO4     | 7.30  | 4.49 | 2.23  |
| 50010.00 | F11 | M-012632- chitinase 3-like 2  | 1117.00  | CHI3L2   | 7.12  | 4.31 | 2.14  |
| 50010.00 | F12 | M-009255- flavin containing m | 2326.00  | FMO1     | 4.51  | 1.70 | 0.85  |
| 50010.00 | F13 | M-009070- carbohydrate (N-ac  | 4166.00  | CHST6    | 7.34  | 4.53 | 2.25  |
| 50010.00 | F14 | M-013743- endo-beta-N-acety   | 64772.00 | FLJ21865 | 2.80  | 0.01 | 0.00  |
| 50010.00 | F15 | M-005810- tripeptidyl peptida | 1200.00  | TPP1     | 4.54  | 1.73 | 0.86  |
| 50010.00 | F16 | M-020804- inositol monophos   | 54928.00 | IMPAD1   | 2.85  | 0.04 | 0.02  |
| 50010.00 | F17 | M-005811- ClpP caseinolytic p | 8192.00  | CLPP     | 3.67  | 0.86 | 0.43  |
| 50010.00 | F18 | M-005873- chromosome 9 op     | 84909.00 | C9orf3   | 1.21  | 1.60 | -0.79 |
| 50010.00 | F19 | M-013022- COX10 homolog, c    | 1352.00  | COX10    | 3.96  | 1.15 | 0.57  |
| 50010.00 | F20 | M-008596- ubiquitin-conjugati | 65264.00 | UBE2Z    | 0.40  | 2.41 | -1.20 |
| 50010.00 | F21 | M-021442- COX15 homolog, c    | 1355.00  | COX15    | 1.69  | 1.12 | -0.55 |
| 50010.00 | F23 | M-005815- carboxypeptidase /  | 1357.00  | CPA1     | 2.63  | 0.18 | -0.09 |
| 50010.00 | G02 | M-008119- aldehyde dehydrog   | 222.00   | ALDH3B2  | 5.49  | 2.68 | 1.33  |
| 50010.00 | G04 | M-009236- aldehyde dehydrog   | 221.00   | ALDH3B1  | 2.94  | 0.13 | 0.07  |
| 50010.00 | G05 | M-019623- vascular endotheli  | 7716.00  | VEZF1    | 5.16  | 2.35 | 1.17  |
| 50010.00 | G06 | M-004038- aldehyde dehydrog   | 218.00   | ALDH3A1  | 0.87  | 1.94 | -0.96 |
| 50010.00 | G07 | M-019558- zinc finger protein | 7727.00  | ZNF174   | 11.16 | 8.35 | 4.14  |
| 50010.00 | G08 | M-009766- aldehyde dehydrog   | 217.00   | ALDH2    | 6.25  | 3.44 | 1.71  |
| 50010.00 | G09 | M-012361- zinc finger protein | 10168.00 | ZNF197   | 4.69  | 1.88 | 0.93  |
| 50010.00 | G10 | M-008254- aldehyde dehydrog   | 219.00   | ALDH1B1  | 8.54  | 5.73 | 2.84  |
| 50010.00 | G11 | M-019702- zinc finger protein | 7572.00  | ZNF24    | 7.56  | 4.75 | 2.36  |
| 50010.00 | G12 | M-009082- aldehyde dehydrog   | 220.00   | ALDH1A3  | 3.81  | 1.00 | 0.50  |
| 50010.00 | G13 | M-006958- zinc finger protein | 23528.00 | ZNF281   | 2.76  | 0.05 | -0.03 |
| 50010.00 | G14 | M-008118- aldehyde dehydrog   | 8854.00  | ALDH1A2  | 2.52  | 0.29 | -0.14 |
| 50010.00 | G15 | M-012776- zinc finger protein | 7581.00  | ZNF33A   | 2.36  | 0.45 | -0.22 |
| 50010.00 | G16 | M-008589- aminolevulinate, d  | 212.00   | ALAS2    | 2.95  | 0.14 | 0.07  |
| 50010.00 | G17 | M-006577- zinc finger protein | 7584.00  | ZNF35    | 2.69  | 0.12 | -0.06 |
| 50010.00 | G18 | M-008655- aldo-keto reductas  | 22977.00 | AKR7A3   | 4.40  | 1.59 | 0.79  |
| 50010.00 | G19 | M-007685- zinc finger protein | 6940.00  | ZNF354A  | 2.04  | 0.77 | -0.38 |
| 50010.00 | G20 | M-008117- aldo-keto reductas  | 8574.00  | AKR7A2   | 5.73  | 2.92 | 1.45  |
| 50010.00 | G21 | M-013163- zinc finger protein | 57541.00 | ZNF398   | 3.16  | 0.35 | 0.18  |
| 50010.00 | G23 | M-006578- myeloid zinc finger | 7593.00  | MZF1     | 1.03  | 1.78 | -0.88 |

|              |                                  |                  |       |       |       |
|--------------|----------------------------------|------------------|-------|-------|-------|
| 50010.00 H02 | M-004796- oleoyl-ACP hydrola     | 55301.00 OLAH    | 1.25  | 1.56  | -0.78 |
| 50010.00 H04 | M-019121- fukutin related pro    | 79147.00 FKRP    | 4.71  | 1.90  | 0.94  |
| 50010.00 H05 | M-005816- carboxypeptidase /     | 1358.00 CPA2     | 4.00  | 1.19  | 0.59  |
| 50010.00 H06 | M-008200- FK506 binding prot     | 51303.00 FKBP11  | 7.97  | 5.16  | 2.56  |
| 50010.00 H07 | M-005819- carboxypeptidase /     | 93979.00 CPA5    | 5.82  | 3.01  | 1.49  |
| 50010.00 H08 | M-004952- fragile histidine tria | 2272.00 FHIT     | 5.89  | 3.08  | 1.53  |
| 50010.00 H09 | M-005820- carboxypeptidase /     | 57094.00 CPA6    | 21.62 | 18.81 | 9.34  |
| 50010.00 H10 | M-013064- fibroblast growth f    | 53834.00 FGFR1   | 4.86  | 2.05  | 1.02  |
| 50010.00 H11 | M-005821- carboxypeptidase f     | 1360.00 CPB1     | 1.83  | 0.98  | -0.49 |
| 50010.00 H12 | M-008128- ferredoxin reducta     | 2232.00 FDXR     | 3.74  | 0.93  | 0.46  |
| 50010.00 H13 | M-005822- carboxypeptidase f     | 1361.00 CPB2     | 4.70  | 1.89  | 0.94  |
| 50010.00 H14 | M-012313- Fukuyama type cor      | 2218.00 FCMD     | 5.02  | 2.21  | 1.10  |
| 50010.00 H15 | M-005827- carboxypeptidase (     | 130749.00 CPO    | 2.46  | 0.35  | -0.18 |
| 50010.00 H16 | M-010139- fructose-1,6-bispho    | 8789.00 FBP2     | 5.91  | 3.10  | 1.54  |
| 50010.00 H17 | M-009749- carnitine palmitoyl    | 1374.00 CPT1A    | 3.27  | 0.46  | 0.23  |
| 50010.00 H18 | M-009635- fumarylacetoaceta      | 2184.00 FAH      | 7.83  | 5.02  | 2.49  |
| 50010.00 H19 | M-008574- carnitine palmitoyl    | 1376.00 CPT2     | 8.58  | 5.77  | 2.86  |
| 50010.00 H20 | M-007748- acyl-CoA synthetas     | 23305.00 ACSL6   | 10.94 | 8.13  | 4.04  |
| 50010.00 H21 | M-009524- carnitine acetyltrar   | 1384.00 CRAT     | 11.44 | 8.63  | 4.28  |
| 50010.00 H23 | M-009230- carnitine O-octano     | 54677.00 CROT    | 3.88  | 1.07  | 0.53  |
| 50010.00 I02 | M-010038- aldo-keto reductas     | 6718.00 AKR1D1   | 0.94  | 1.87  | -0.93 |
| 50010.00 I04 | M-004041- aldo-keto reductas     | 1109.00 AKR1C4   | 1.94  | 0.87  | -0.43 |
| 50010.00 I05 | M-017732- zinc finger protein    | 7596.00 ZNF45    | 6.08  | 3.27  | 1.63  |
| 50010.00 I06 | M-008116- aldo-keto reductas     | 8644.00 AKR1C3   | 1.13  | 1.68  | -0.83 |
| 50010.00 I07 | M-015554- zinc finger protein    | 55769.00 ZNF83   | 2.97  | 0.16  | 0.08  |
| 50010.00 I08 | M-009691- aldo-keto reductas     | 57016.00 AKR1B10 | 3.64  | 0.83  | 0.41  |
| 50010.00 I09 | M-019562- zinc finger protein    | 7639.00 ZNF85    | 1.30  | 1.51  | -0.75 |
| 50010.00 I10 | M-010232- A kinase (PRKA) an     | 9590.00 AKAP12   | 1.67  | 1.14  | -0.57 |
| 50010.00 I11 | M-019778- CCHC-type zinc fin     | 7555.00 CNBP     | 1.46  | 1.35  | -0.67 |
| 50010.00 I12 | M-008810- S-adenosylhomocy       | 10768.00 AHCYL1  | 1.19  | 1.62  | -0.80 |
| 50010.00 I13 | M-006945- IKAROS family zinc     | 22806.00 IKZF3   | 3.28  | 0.47  | 0.23  |
| 50010.00 I14 | M-009599- S-adenosylhomocy       | 191.00 AHCY      | 5.59  | 2.78  | 1.38  |
| 50010.00 I15 | M-010993- autoimmune regul.      | 326.00 AIRE      | 1.23  | 1.58  | -0.79 |
| 50010.00 I16 | M-008925- alanine-glyoxylate     | 189.00 AGXT      | 0.78  | 2.03  | -1.01 |
| 50010.00 I17 | M-017471- cAMP responsive e      | 10488.00 CREB3   | 0.54  | 2.27  | -1.13 |
| 50010.00 I18 | M-009267- alkylglycerone pho     | 8540.00 AGPS     | 1.53  | 1.28  | -0.64 |
| 50010.00 I19 | M-016645- HIV-1 Tat specific f   | 27336.00 HTATSF1 | 2.64  | 0.17  | -0.08 |
| 50010.00 I20 | M-003811- 1-acylglycerol-3-ph    | 10555.00 AGPAT2  | 1.22  | 1.59  | -0.79 |
| 50010.00 I21 | M-016947- RRN3 RNA polymer       | 54700.00 RRN3    | 1.00  | 1.81  | -0.90 |
| 50010.00 I23 | M-019850- transcription elong    | 9338.00 TCEAL1   | 1.20  | 1.61  | -0.80 |
| 50010.00 J02 | M-005869- coagulation factor     | 2161.00 F12      | 1.72  | 1.09  | -0.54 |
| 50010.00 J04 | M-005868- coagulation factor     | 2160.00 F11      | 0.53  | 2.28  | -1.13 |
| 50010.00 J05 | M-011631- crystallin, mu         | 1428.00 CRYM     | 6.93  | 4.12  | 2.04  |
| 50010.00 J06 | M-012578- exostoses (multipk     | 2137.00 EXTL3    | 1.33  | 1.48  | -0.74 |
| 50010.00 J07 | M-008314- cysteine sulfinic ac   | 51380.00 CSAD    | 6.52  | 3.71  | 1.84  |
| 50010.00 J08 | M-012577- exostoses (multipk     | 2135.00 EXTL2    | 1.86  | 0.95  | -0.47 |
| 50010.00 J09 | M-011956- galactose-3-O-sulfo    | 9514.00 GAL3ST1  | 4.83  | 2.02  | 1.00  |

|              |                                                        |           |          |      |      |       |
|--------------|--------------------------------------------------------|-----------|----------|------|------|-------|
| 50010.00 J10 | M-019803- exostoses (multiple)                         | 2134.00   | EXTL1    | 0.68 | 2.13 | -1.06 |
| 50010.00 J11 | M-008962- C-terminal binding                           | 1488.00   | CTBP2    | 1.21 | 1.60 | -0.80 |
| 50010.00 J12 | M-011031- exostoses (multiple)                         | 2132.00   | EXT2     | 7.29 | 4.48 | 2.23  |
| 50010.00 J13 | M-003481- cystathionase (cystathionase)                | 1491.00   | CTH      | 5.95 | 3.14 | 1.56  |
| 50010.00 J14 | M-011030- exostoses (multiple)                         | 2131.00   | EXT1     | 1.47 | 1.34 | -0.66 |
| 50010.00 J15 | M-006644- CTP synthase                                 | 1503.00   | CTPS     | 1.83 | 0.98 | -0.48 |
| 50010.00 J16 | M-008127- electron-transfer flavin                     | 2110.00   | ETFDH    | 1.28 | 1.53 | -0.76 |
| 50010.00 J17 | M-006645- CTP synthase II                              | 56474.00  | CTPS2    | 1.95 | 0.86 | -0.43 |
| 50010.00 J18 | M-008315- esterase D/formylglycine                     | 2098.00   | ESD      | 2.09 | 0.72 | -0.36 |
| 50010.00 J19 | M-005834- chymotrypsin-like                            | 1506.00   | CTRL     | 1.81 | 1.00 | -0.49 |
| 50010.00 J20 | M-019249- protein disulfide isomerase                  | 9601.00   | PDIA4    | 0.77 | 2.04 | -1.01 |
| 50010.00 J21 | M-004266- cathepsin B                                  | 1508.00   | CTSB     | 3.40 | 0.59 | 0.29  |
| 50010.00 J23 | M-005835- cathepsin C                                  | 1075.00   | CTSC     | 4.79 | 1.98 | 0.99  |
| 50010.00 K02 | M-003810- 1-acylglycerol-3-phosphate                   | 10554.00  | AGPAT1   | 0.82 | 1.99 | -0.99 |
| 50010.00 K04 | M-004037- aspartylglucosaminidase                      | 175.00    | AGA      | 6.60 | 3.79 | 1.88  |
| 50010.00 K05 | M-013340- BRF2, subunit of RNA polymerase II           | 55290.00  | BRF2     | 6.05 | 3.24 | 1.61  |
| 50010.00 K06 | M-031750- aflatoxin B1 aldehyde                        | 246181.00 | AFAR3    | 3.94 | 1.13 | 0.56  |
| 50010.00 K07 | M-020166- CUG triplet repeat, expanded                 | 10658.00  | CUGBP1   | 6.61 | 3.80 | 1.89  |
| 50010.00 K08 | M-010986- adenylosuccinate lyase                       | 158.00    | ADSL     | 2.93 | 0.12 | 0.06  |
| 50010.00 K09 | M-012614- density-regulated protein 1                  | 8562.00   | DENR     | 2.81 | 0.00 | 0.00  |
| 50010.00 K10 | M-009297- poly (ADP-ribose) polymerase 1               | 10039.00  | PARP3    | 3.72 | 0.91 | 0.45  |
| 50010.00 K11 | M-003882- eukaryotic translation initiation factor 1A2 | 1917.00   | EEF1A2   | 3.80 | 0.99 | 0.49  |
| 50010.00 K12 | M-007244- poly (ADP-ribose) polymerase 4               | 143.00    | PARP4    | 3.40 | 0.59 | 0.30  |
| 50010.00 K13 | M-011647- eukaryotic translation initiation factor 1B2 | 1933.00   | EEF1B2   | 2.48 | 0.33 | -0.16 |
| 50010.00 K14 | M-020822- ADP-ribosylhydrolase 1                       | 54936.00  | ADPRHL2  | 3.22 | 0.41 | 0.20  |
| 50010.00 K15 | M-011908- eukaryotic translation initiation factor 1AY | 9086.00   | EIF1AY   | 1.58 | 1.23 | -0.61 |
| 50010.00 K16 | M-008526- ADP-ribosylhydrolase 1                       | 113622.00 | ADPRHL1  | 2.45 | 0.36 | -0.18 |
| 50010.00 K17 | M-016686- eukaryotic translation initiation factor 2B4 | 8890.00   | EIF2B4   | 1.65 | 1.16 | -0.58 |
| 50010.00 K18 | M-005771- ADAM metalloproteinase 2                     | 9509.00   | ADAMTS2  | 3.10 | 0.29 | 0.15  |
| 50010.00 K19 | M-012625- eukaryotic translation initiation factor 2B5 | 8893.00   | EIF2B5   | 4.18 | 1.37 | 0.68  |
| 50010.00 K20 | M-005765- ADAM metalloproteinase 14                    | 140766.00 | ADAMTS14 | 4.95 | 2.14 | 1.06  |
| 50010.00 K21 | M-019532- eukaryotic translation initiation factor 3S1 | 8669.00   | EIF3S1   | 3.98 | 1.17 | 0.58  |
| 50010.00 K23 | M-019531- eukaryotic translation initiation factor 3S2 | 8668.00   | EIF3S2   | 3.85 | 1.04 | 0.51  |
| 50010.00 L02 | M-008393- epoxide hydrolase                            | 2052.00   | EPHX1    | 1.22 | 1.59 | -0.79 |
| 50010.00 L04 | M-009805- ectonucleotide pyrophosphatase               | 59084.00  | ENPP5    | 8.44 | 5.63 | 2.79  |
| 50010.00 L05 | M-003649- cathepsin D                                  | 1509.00   | CTSD     | 9.48 | 6.67 | 3.31  |
| 50010.00 L06 | M-009214- ectonucleotide pyrophosphatase               | 22875.00  | ENPP4    | 1.35 | 1.46 | -0.72 |
| 50010.00 L07 | M-005836- cathepsin E                                  | 1510.00   | CTSE     | 4.45 | 1.64 | 0.81  |
| 50010.00 L08 | M-015640- elaC homolog 2 (ElaC)                        | 60528.00  | ELAC2    | 4.86 | 2.05 | 1.02  |
| 50010.00 L09 | M-005837- cathepsin F                                  | 8722.00   | CTSF     | 1.29 | 1.52 | -0.75 |
| 50010.00 L10 | M-005861- elastase 2, neutrophil                       | 1991.00   | ELA2     | 4.77 | 1.96 | 0.97  |
| 50010.00 L11 | M-005838- cathepsin G                                  | 1511.00   | CTSG     | 2.12 | 0.69 | -0.34 |
| 50010.00 L12 | M-004276- egl nine homolog 1                           | 54583.00  | EGLN1    | 3.63 | 0.82 | 0.41  |
| 50010.00 L13 | M-005839- cathepsin H                                  | 1512.00   | CTSH     | 3.32 | 0.51 | 0.25  |
| 50010.00 L14 | M-011261- ephrin-B3                                    | 1949.00   | EFNB3    | 3.04 | 0.23 | 0.11  |
| 50010.00 L15 | M-005841- cathepsin L1                                 | 1514.00   | CTSL1    | 1.91 | 0.90 | -0.45 |
| 50010.00 L16 | M-006858- ephrin-A4                                    | 1945.00   | EFNA4    | 0.86 | 1.95 | -0.97 |



|              |                               |                   |       |       |       |
|--------------|-------------------------------|-------------------|-------|-------|-------|
| 50010.00 L17 | M-005842- cathepsin L2        | 1515.00 CTSL2     | 2.97  | 0.16  | 0.08  |
| 50010.00 L18 | M-019190- ephrin-A3           | 1944.00 EFNA3     | 1.78  | 1.03  | -0.51 |
| 50010.00 L19 | M-005843- cathepsin O         | 1519.00 CTSO      | 7.57  | 4.76  | 2.36  |
| 50010.00 L20 | M-010343- enoyl Coenzyme A    | 1892.00 ECHS1     | 0.88  | 1.93  | -0.96 |
| 50010.00 L21 | M-005844- cathepsin S         | 1520.00 CTSS      | 6.51  | 3.70  | 1.83  |
| 50010.00 L23 | M-005845- cathepsin W         | 1521.00 CTSW      | 1.24  | 1.57  | -0.78 |
| 50010.00 M02 | M-010756- ADAM metallopepi    | 203102.00 ADAM32  | 3.46  | 0.65  | 0.32  |
| 50010.00 M04 | M-008808- ADAM metallopepi    | 11086.00 ADAM29   | 2.61  | 0.20  | -0.10 |
| 50010.00 M05 | M-003883- eukaryotic translat | 8667.00 EIF3S3    | 22.89 | 20.08 | 9.97  |
| 50010.00 M06 | M-010701- ADAM metallopepi    | 8749.00 ADAM18    | 12.88 | 10.07 | 5.00  |
| 50010.00 M07 | M-019533- eukaryotic translat | 8666.00 EIF3S4    | 0.77  | 2.04  | -1.01 |
| 50010.00 M08 | M-009588- adenosine deamin    | 100.00 ADA        | 2.01  | 0.80  | -0.40 |
| 50010.00 M09 | M-019535- eukaryotic translat | 8665.00 EIF3S5    | 3.96  | 1.15  | 0.57  |
| 50010.00 M10 | M-009832- aminoacylase 1      | 95.00 ACY1        | 2.08  | 0.73  | -0.36 |
| 50010.00 M11 | M-010518- eukaryotic translat | 3646.00 EIF3S6    | 2.99  | 0.18  | 0.09  |
| 50010.00 M12 | M-005756- acrosin             | 49.00 ACR         | 3.47  | 0.66  | 0.33  |
| 50010.00 M13 | M-017556- eukaryotic translat | 8664.00 EIF3S7    | 1.93  | 0.88  | -0.44 |
| 50010.00 M14 | M-008366- acid phosphatase,   | 93650.00 ACPT     | 3.56  | 0.75  | 0.37  |
| 50010.00 M15 | M-009036- eukaryotic translat | 8663.00 EIF3S8    | 0.00  | 2.81  | -1.39 |
| 50010.00 M16 | M-008665- acid phosphatase €  | 51205.00 ACP6     | 1.92  | 0.89  | -0.44 |
| 50010.00 M17 | M-019196- eukaryotic translat | 8662.00 EIF3S9    | 4.91  | 2.10  | 1.04  |
| 50010.00 M18 | M-008205- acid phosphatase 2  | 53.00 ACP2        | 1.68  | 1.13  | -0.56 |
| 50010.00 M19 | M-020179- eukaryotic translat | 1975.00 EIF4B     | 8.85  | 6.04  | 3.00  |
| 50010.00 M20 | M-005074- acyl-Coenzyme A o   | 51.00 ACOX1       | 11.33 | 8.52  | 4.23  |
| 50010.00 M21 | M-003884- eukaryotic translat | 1977.00 EIF4E     | 21.80 | 18.99 | 9.42  |
| 50010.00 M23 | M-010517- immature colon ca   | 3396.00 ICT1      | 2.36  | 0.45  | -0.22 |
| 50010.00 N02 | M-004035- enoyl Coenzyme A    | 1891.00 ECH1      | 3.37  | 0.56  | 0.28  |
| 50010.00 N04 | M-008979- ubiquitin-conjugati | 63893.00 UBE2O    | 2.72  | 0.09  | -0.04 |
| 50010.00 N05 | M-005846- cathepsin Z         | 1522.00 CTSZ      | 0.91  | 1.90  | -0.94 |
| 50010.00 N06 | M-008455- dihydropyrimidina:  | 1807.00 DPYS      | 43.56 | 40.75 | 20.23 |
| 50010.00 N07 | M-017667- cytochrome b-561    | 11068.00 CYB561D2 | 3.61  | 0.80  | 0.40  |
| 50010.00 N08 | M-004181- dipeptidyl-peptida: | 1803.00 DPP4      | 9.83  | 7.02  | 3.49  |
| 50010.00 N09 | M-008600- cytochrome b5 red   | 51706.00 CYB5R1   | 9.46  | 6.65  | 3.30  |
| 50010.00 N10 | M-005853- dipeptidyl-peptida: | 10072.00 DPP3     | 1.42  | 1.39  | -0.69 |
| 50010.00 N11 | M-008752- cytochrome b5 red   | 51700.00 CYB5R2   | 2.95  | 0.14  | 0.07  |
| 50010.00 N12 | M-011535- dolichyl-phosphate  | 8813.00 DPM1      | 1.27  | 1.54  | -0.76 |
| 50010.00 N13 | M-008635- cytochrome P450,    | 1584.00 CYP11B1   | 2.94  | 0.13  | 0.07  |
| 50010.00 N14 | M-008343- dipeptidase 3       | 64180.00 DPEP3    | 1.01  | 1.80  | -0.89 |
| 50010.00 N15 | M-008806- cytochrome P450,    | 1589.00 CYP21A2   | 1.41  | 1.40  | -0.69 |
| 50010.00 N16 | M-005931- dipeptidase 2       | 64174.00 DPEP2    | 3.63  | 0.82  | 0.41  |
| 50010.00 N17 | M-008233- cytochrome P450,    | 1593.00 CYP27A1   | 1.85  | 0.96  | -0.48 |
| 50010.00 N18 | M-005852- dipeptidase 1 (ren  | 1800.00 DPEP1     | 0.96  | 1.85  | -0.92 |
| 50010.00 N19 | M-008286- cytochrome P450,    | 1558.00 CYP2C8    | 7.29  | 4.48  | 2.22  |
| 50010.00 N20 | M-009769- ADP-ribosyltransfe  | 420.00 ART4       | 1.59  | 1.22  | -0.60 |
| 50010.00 N21 | M-008285- cytochrome P450,    | 1559.00 CYP2C9    | 3.84  | 1.03  | 0.51  |
| 50010.00 N23 | M-008934- cytochrome P450,    | 9420.00 CYP7B1    | 1.16  | 1.65  | -0.82 |
| 50010.00 O02 | M-005755- angiotensin I conve | 59272.00 ACE2     | 5.49  | 2.68  | 1.33  |

|              |                                |           |          |       |       |       |
|--------------|--------------------------------|-----------|----------|-------|-------|-------|
| 50010.00 O04 | M-009408- acetyl-Coenzyme A    | 38.00     | ACAT1    | 8.28  | 5.47  | 2.71  |
| 50010.00 O05 | M-015386- mitochondrial tran   | 54516.00  | MTRF1L   | 2.61  | 0.20  | -0.10 |
| 50010.00 O06 | M-009392- acyl-Coenzyme A d    | 37.00     | ACADVL   | 2.68  | 0.13  | -0.06 |
| 50010.00 O07 | M-013054- eukaryotic translat  | 7458.00   | EIF4H    | 2.91  | 0.10  | 0.05  |
| 50010.00 O08 | M-003855- acyl-Coenzyme A d    | 36.00     | ACADSB   | 1.31  | 1.50  | -0.75 |
| 50010.00 O09 | M-016315- alpha 1,4-galactosy  | 53947.00  | A4GALT   | 3.06  | 0.25  | 0.13  |
| 50010.00 O10 | M-010041- acyl-Coenzyme A d    | 35.00     | ACADS    | 5.16  | 2.35  | 1.17  |
| 50010.00 O11 | M-009247- aminoadipate-sem     | 10157.00  | AASS     | 2.27  | 0.54  | -0.27 |
| 50010.00 O12 | M-008111- acyl-Coenzyme A d    | 34.00     | ACADM    | 5.59  | 2.78  | 1.38  |
| 50010.00 O13 | M-004060- 4-aminobutyrate a    | 18.00     | ABAT     | 3.27  | 0.46  | 0.23  |
| 50010.00 O14 | M-009851- acyl-Coenzyme A d    | 33.00     | ACADL    | 5.81  | 3.00  | 1.49  |
| 50010.00 O15 | M-008331- abhydrolase domai    | 11057.00  | ABHD2    | 2.35  | 0.46  | -0.23 |
| 50010.00 O16 | M-009329- acetyl-Coenzyme A    | 30.00     | ACAA1    | 1.23  | 1.58  | -0.78 |
| 50010.00 O17 | M-008587- abhydrolase domai    | 171586.00 | ABHD3    | 0.97  | 1.84  | -0.91 |
| 50010.00 O18 | M-009657- abhydrolase domai    | 79852.00  | ABHD9    | 3.45  | 0.64  | 0.32  |
| 50010.00 O19 | M-009567- abhydrolase domai    | 63874.00  | ABHD4    | 4.44  | 1.63  | 0.81  |
| 50010.00 O20 | M-008028- abhydrolase domai    | 79575.00  | ABHD8    | 2.49  | 0.32  | -0.16 |
| 50010.00 O21 | M-009257- abhydrolase domai    | 51099.00  | ABHD5    | 5.69  | 2.88  | 1.43  |
| 50010.00 O23 | M-008683- abhydrolase domai    | 57406.00  | ABHD6    | 2.91  | 0.10  | 0.05  |
| 50010.00 P02 | M-008125- dimethylglycine de   | 29958.00  | DMGDH    | 31.37 | 28.56 | 14.18 |
| 50010.00 P04 | M-009941- dihydrolipoamide S   | 1743.00   | DLST     | 1.23  | 1.58  | -0.78 |
| 50010.00 P05 | M-009756- D-amino-acid oxidase | 1610.00   | DAO      | 2.50  | 0.31  | -0.15 |
| 50010.00 P06 | M-009554- cytochrome b5 red    | 1727.00   | CYB5R3   | 1.50  | 1.31  | -0.65 |
| 50010.00 P07 | M-008290- debranching enzym    | 51163.00  | DBR1     | 2.48  | 0.33  | -0.16 |
| 50010.00 P08 | M-008859- hydroxysteroid (17   | 51170.00  | HSD17B11 | 2.24  | 0.57  | -0.28 |
| 50010.00 P09 | M-008794- dodecenoyl-Coenz'    | 1632.00   | DCI      | 1.94  | 0.87  | -0.43 |
| 50010.00 P10 | M-009481- hydroxysteroid (17   | 51171.00  | HSD17B14 | 2.68  | 0.13  | -0.07 |
| 50010.00 P11 | M-008835- dicarbonyl/L-xylulc  | 51181.00  | DCXR     | 1.32  | 1.49  | -0.74 |
| 50010.00 P12 | M-009619- dihydrooorotate del  | 1723.00   | DHODH    | 2.58  | 0.23  | -0.12 |
| 50010.00 P13 | M-010156- dopa decarboxylas    | 1644.00   | DDC      | 2.12  | 0.69  | -0.34 |
| 50010.00 P14 | M-005849- desert hedgehog h    | 50846.00  | DHH      | 2.13  | 0.68  | -0.34 |
| 50010.00 P15 | M-009642- 2,4-dienoyl CoA re   | 1666.00   | DECR1    | 1.88  | 0.93  | -0.46 |
| 50010.00 P16 | M-008799- dihydrofolate redu   | 1719.00   | DHFR     | 3.94  | 1.13  | 0.56  |
| 50010.00 P17 | M-009627- 2,4-dienoyl CoA re   | 26063.00  | DECR2    | 0.42  | 2.39  | -1.19 |
| 50010.00 P18 | M-020182- 7-dehydrocholeste    | 1717.00   | DHCR7    | 0.79  | 2.02  | -1.00 |
| 50010.00 P19 | M-006675- degenerative sperr   | 8560.00   | DEGS1    | 4.04  | 1.23  | 0.61  |
| 50010.00 P20 | M-010222- 24-dehydrocholest    | 1718.00   | DHCR24   | 2.48  | 0.33  | -0.16 |
| 50010.00 P21 | M-003922- diacylglycerol O-ac  | 8694.00   | DGAT1    | 1.92  | 0.89  | -0.44 |
| 50010.00 P23 | M-006716- diacylglycerol kina  | 160851.00 | DGKH     | 28.17 | 25.36 | 12.59 |
|              |                                |           | mdn      | 2.81  | 1.36  |       |
|              |                                |           | 3xMAD    |       | 4.08  |       |
|              |                                |           | MADc     |       | 2.01  |       |
| 50010.00 C22 |                                |           |          | 23.96 |       | 11.88 |
| 50010.00 D22 |                                |           |          | 15.15 |       | 15.88 |
| 50010.00 E22 |                                |           |          | 11.25 |       | 11.89 |
| 50010.00 F22 |                                |           |          | 19.64 |       | 18.44 |

|              |                                           |                   |       |       |
|--------------|-------------------------------------------|-------------------|-------|-------|
|              |                                           | mn                | 17.50 | 14.52 |
|              |                                           | sd                | 4.77  | 2.79  |
| 50010.00 G22 |                                           |                   |       |       |
| 50010.00 H22 |                                           |                   | 2.08  | 2.50  |
| 50010.00 I22 |                                           |                   | 1.52  | 0.45  |
| 50010.00 J22 |                                           |                   | 1.27  | 4.42  |
|              |                                           |                   | 0.55  | 1.82  |
|              |                                           | mn                | 1.36  | 2.30  |
|              |                                           | sd                | 0.63  | 1.65  |
| 50010.00 G03 | M-003290- polo-like kinase 1 (            | 5347.00 PLK1 SMAF | 4.76  | 7.98  |
| 50010.00 H03 | M-003290- polo-like kinase 1 (            | 5347.00 PLK1 SMAF | 12.60 | 2.55  |
| 50010.00 I03 | D-001206-∴siControl non-targeting siRNA ‡ |                   | 2.38  | 3.38  |
| 50010.00 J03 | D-001206-∴siControl non-targeting siRNA ‡ |                   | 0.85  | 1.75  |
| 50010.00 K03 | D-001600-(siGLO RISC-free siRNA           |                   | 13.85 | 13.31 |
| 50010.00 L03 | D-001600-(siGLO RISC-free siRNA           |                   | 12.56 | 7.90  |

| <u>% inf</u> | <u>abs dev</u> | <u>robust Z</u> | <u>% inf</u> | <u>abs dev</u> | <u>robust Z</u> |
|--------------|----------------|-----------------|--------------|----------------|-----------------|
| 3.18         | 1.01           | 0.59            | 3.42         | 0.74           | 0.40            |
| 2.48         | 0.31           | 0.18            | 0.77         | 1.91           | -1.02           |
| 1.60         | 0.57           | -0.33           | 1.50         | 1.18           | -0.63           |
| 2.92         | 0.75           | 0.44            | 4.21         | 1.53           | 0.82            |
| 1.30         | 0.87           | -0.51           | 0.92         | 1.76           | -0.94           |
| 2.97         | 0.80           | 0.47            | 2.28         | 0.40           | -0.22           |
| 1.29         | 0.88           | -0.51           | 1.36         | 1.32           | -0.71           |
| 1.89         | 0.28           | -0.16           | 1.07         | 1.61           | -0.86           |
| 3.86         | 1.69           | 0.98            | 0.42         | 2.26           | -1.21           |
| 2.26         | 0.09           | 0.05            | 4.47         | 1.79           | 0.95            |
| 1.55         | 0.62           | -0.36           | 1.84         | 0.84           | -0.45           |
| 2.09         | 0.08           | -0.05           | 3.98         | 1.30           | 0.69            |
| 0.24         | 1.93           | -1.12           | 0.88         | 1.80           | -0.96           |
| 1.73         | 0.44           | -0.26           | 4.00         | 1.32           | 0.70            |
| 2.21         | 0.04           | 0.03            | 2.88         | 0.20           | 0.10            |
| 2.25         | 0.08           | 0.05            | 1.37         | 1.31           | -0.70           |
| 2.95         | 0.78           | 0.46            | 0.95         | 1.73           | -0.93           |
| 0.58         | 1.59           | -0.93           | 2.14         | 0.54           | -0.29           |
| 4.07         | 1.90           | 1.11            | 10.72        | 8.04           | 4.29            |
| 1.67         | 0.50           | -0.29           | 2.05         | 0.63           | -0.34           |
| 3.45         | 1.28           | 0.75            | 3.94         | 1.26           | 0.67            |
| 4.18         | 2.01           | 1.17            | 1.74         | 0.94           | -0.50           |
| 2.38         | 0.21           | 0.12            | 1.87         | 0.81           | -0.44           |
| 9.24         | 7.07           | 4.12            | 3.36         | 0.68           | 0.36            |
| 3.27         | 1.10           | 0.64            | 1.37         | 1.31           | -0.70           |
| 1.32         | 0.85           | -0.50           | 0.93         | 1.75           | -0.93           |
| 2.09         | 0.08           | -0.05           | 1.25         | 1.43           | -0.76           |
| 1.82         | 0.35           | -0.20           | 3.13         | 0.45           | 0.24            |
| 3.21         | 1.04           | 0.60            | 1.10         | 1.58           | -0.84           |
| 2.11         | 0.06           | -0.04           | 4.49         | 1.81           | 0.97            |
| 3.96         | 1.79           | 1.04            | 2.34         | 0.34           | -0.18           |
| 4.51         | 2.34           | 1.36            | 4.49         | 1.81           | 0.97            |
| 0.15         | 2.02           | -1.18           | 1.83         | 0.85           | -0.45           |
| 1.93         | 0.24           | -0.14           | 3.68         | 1.00           | 0.53            |
| 0.85         | 1.32           | -0.77           | 1.77         | 0.91           | -0.49           |
| 0.63         | 1.54           | -0.90           | 1.63         | 1.05           | -0.56           |
| 9.79         | 7.62           | 4.44            | 4.28         | 1.60           | 0.85            |
| 0.43         | 1.74           | -1.02           | 1.50         | 1.18           | -0.63           |
| 1.99         | 0.18           | -0.10           | 1.27         | 1.41           | -0.75           |
| 0.65         | 1.52           | -0.89           | 0.58         | 2.10           | -1.12           |
| 0.13         | 2.04           | -1.19           | 1.31         | 1.37           | -0.73           |
| 4.14         | 1.97           | 1.15            | 2.69         | 0.01           | 0.01            |
| 5.42         | 3.25           | 1.89            | 2.30         | 0.38           | -0.20           |
| <u>14.35</u> | <u>12.18</u>   | <u>7.10</u>     | <u>11.56</u> | <u>8.88</u>    | <u>4.74</u> y   |
| 1.59         | 0.58           | -0.34           | 2.64         | 0.04           | -0.02           |
| <u>8.34</u>  | <u>6.17</u>    | <u>3.60</u>     | <u>7.66</u>  | <u>4.98</u>    | <u>2.66</u> y   |

|      |      |       |      |      |       |
|------|------|-------|------|------|-------|
| 1.60 | 0.57 | -0.33 | 4.52 | 1.84 | 0.98  |
| 0.52 | 1.65 | -0.96 | 1.65 | 1.03 | -0.55 |
| 2.00 | 0.17 | -0.10 | 1.68 | 1.00 | -0.53 |
| 1.31 | 0.86 | -0.50 | 2.83 | 0.15 | 0.08  |
| 0.31 | 1.86 | -1.08 | 3.11 | 0.43 | 0.23  |
| 0.81 | 1.36 | -0.79 | 5.00 | 2.32 | 1.24  |
| 1.57 | 0.60 | -0.35 | 1.92 | 0.76 | -0.41 |
| 0.31 | 1.86 | -1.08 | 1.55 | 1.13 | -0.61 |
| 0.79 | 1.38 | -0.80 | 2.49 | 0.19 | -0.10 |
| 1.94 | 0.23 | -0.14 | 1.31 | 1.37 | -0.73 |
| 3.02 | 0.85 | 0.50  | 5.51 | 2.83 | 1.51  |
| 2.04 | 0.13 | -0.07 | 6.27 | 3.59 | 1.92  |
| 1.45 | 0.72 | -0.42 | 1.47 | 1.21 | -0.65 |
| 1.85 | 0.32 | -0.19 | 5.25 | 2.57 | 1.37  |
| 0.32 | 1.85 | -1.08 | 3.21 | 0.53 | 0.29  |
| 1.62 | 0.55 | -0.32 | 2.67 | 0.01 | -0.01 |
| 0.81 | 1.36 | -0.79 | 3.65 | 0.97 | 0.52  |
| 1.47 | 0.70 | -0.41 | 0.79 | 1.89 | -1.01 |
| 6.89 | 4.72 | 2.75  | 4.31 | 1.63 | 0.87  |
| 2.22 | 0.05 | 0.03  | 2.22 | 0.46 | -0.24 |
| 3.30 | 1.13 | 0.66  | 1.00 | 1.68 | -0.90 |
| 0.65 | 1.52 | -0.89 | 2.45 | 0.23 | -0.12 |
| 0.93 | 1.24 | -0.72 | 2.31 | 0.37 | -0.20 |
| 2.86 | 0.69 | 0.40  | 3.57 | 0.89 | 0.48  |
| 6.21 | 4.04 | 2.36  | 3.70 | 1.02 | 0.54  |
| 3.85 | 1.68 | 0.98  | 4.11 | 1.43 | 0.77  |
| 2.20 | 0.03 | 0.01  | 3.24 | 0.56 | 0.30  |
| 6.17 | 4.00 | 2.33  | 3.31 | 0.63 | 0.34  |
| 4.54 | 2.37 | 1.38  | 3.66 | 0.98 | 0.53  |
| 3.17 | 1.00 | 0.58  | 3.05 | 0.37 | 0.20  |
| 5.88 | 3.71 | 2.16  | 2.55 | 0.13 | -0.07 |
| 1.66 | 0.51 | -0.30 | 1.50 | 1.18 | -0.63 |
| 5.21 | 3.04 | 1.77  | 6.30 | 3.62 | 1.93  |
| 1.23 | 0.94 | -0.54 | 3.00 | 0.32 | 0.17  |
| 1.80 | 0.37 | -0.21 | 1.33 | 1.35 | -0.72 |
| 0.65 | 1.52 | -0.88 | 0.72 | 1.96 | -1.05 |
| 0.68 | 1.49 | -0.87 | 1.53 | 1.15 | -0.61 |
| 1.66 | 0.51 | -0.29 | 5.02 | 2.34 | 1.25  |
| 0.09 | 2.08 | -1.21 | 1.56 | 1.12 | -0.60 |
| 1.25 | 0.92 | -0.54 | 3.30 | 0.62 | 0.33  |
| 1.78 | 0.39 | -0.23 | 6.37 | 3.69 | 1.97  |
| 0.37 | 1.80 | -1.05 | 1.47 | 1.21 | -0.65 |
| 1.61 | 0.56 | -0.33 | 5.50 | 2.82 | 1.50  |
| 5.86 | 3.69 | 2.15  | 1.58 | 1.10 | -0.59 |
| 0.37 | 1.80 | -1.05 | 3.65 | 0.97 | 0.52  |
| 0.14 | 2.03 | -1.19 | 3.68 | 1.00 | 0.53  |
| 0.69 | 1.48 | -0.86 | 1.08 | 1.60 | -0.85 |

|       |       |       |       |      |        |
|-------|-------|-------|-------|------|--------|
| 4.99  | 2.82  | 1.64  | 10.19 | 7.51 | 4.01   |
| 3.85  | 1.68  | 0.98  | 5.59  | 2.91 | 1.55   |
| 3.63  | 1.46  | 0.85  | 4.02  | 1.34 | 0.71   |
| 3.21  | 1.04  | 0.61  | 10.96 | 8.28 | 4.42   |
| 1.53  | 0.64  | -0.38 | 5.46  | 2.78 | 1.49   |
| 0.13  | 2.04  | -1.19 | 2.52  | 0.16 | -0.08  |
| 1.59  | 0.58  | -0.34 | 0.60  | 2.08 | -1.11  |
| 2.24  | 0.07  | 0.04  | 0.73  | 1.95 | -1.04  |
| 1.88  | 0.29  | -0.17 | 0.99  | 1.69 | -0.90  |
| 0.99  | 1.18  | -0.69 | 1.31  | 1.37 | -0.73  |
| 0.89  | 1.28  | -0.74 | 0.56  | 2.12 | -1.13  |
| 7.22  | 5.05  | 2.94  | 3.99  | 1.31 | 0.70 x |
| 2.90  | 0.73  | 0.43  | 0.39  | 2.29 | -1.22  |
| 8.36  | 6.19  | 3.61  | 1.68  | 1.00 | -0.53  |
| 11.66 | 9.49  | 5.53  | 4.62  | 1.94 | 1.03 y |
| 5.07  | 2.90  | 1.69  | 0.35  | 2.33 | -1.25  |
| 3.11  | 0.94  | 0.55  | 1.75  | 0.93 | -0.50  |
| 5.82  | 3.65  | 2.13  | 3.95  | 1.27 | 0.68 y |
| 2.58  | 0.41  | 0.24  | 0.33  | 2.35 | -1.25  |
| 3.26  | 1.09  | 0.64  | 2.50  | 0.18 | -0.10  |
| 2.37  | 0.20  | 0.12  | 4.23  | 1.55 | 0.83   |
| 4.44  | 2.27  | 1.32  | 1.33  | 1.35 | -0.72  |
| 0.78  | 1.39  | -0.81 | 0.41  | 2.27 | -1.21  |
| 10.15 | 7.98  | 4.65  | 3.43  | 0.75 | 0.40   |
| 1.43  | 0.74  | -0.43 | 1.69  | 0.99 | -0.53  |
| 1.82  | 0.35  | -0.21 | 0.57  | 2.11 | -1.13  |
| 4.07  | 1.90  | 1.11  | 0.24  | 2.44 | -1.30  |
| 3.30  | 1.13  | 0.66  | 3.67  | 0.99 | 0.53   |
| 1.97  | 0.20  | -0.11 | 7.21  | 4.53 | 2.42   |
| 2.43  | 0.26  | 0.15  | 4.30  | 1.62 | 0.87   |
| 2.45  | 0.28  | 0.16  | 2.98  | 0.30 | 0.16   |
| 15.55 | 13.38 | 7.80  | 9.92  | 7.24 | 3.86 y |
| 4.25  | 2.08  | 1.21  | 1.65  | 1.03 | -0.55  |
| 6.19  | 4.02  | 2.34  | 2.64  | 0.04 | -0.02  |
| 8.23  | 6.06  | 3.53  | 5.65  | 2.97 | 1.59 y |
| 6.26  | 4.09  | 2.38  | 5.93  | 3.25 | 1.73 y |
| 4.74  | 2.57  | 1.50  | 1.65  | 1.03 | -0.55  |
| 2.44  | 0.27  | 0.16  | 0.58  | 2.10 | -1.12  |
| 4.53  | 2.36  | 1.37  | 7.59  | 4.91 | 2.62   |
| 6.29  | 4.12  | 2.40  | 4.57  | 1.89 | 1.01   |
| 3.35  | 1.18  | 0.69  | 3.46  | 0.78 | 0.42   |
| 2.01  | 0.16  | -0.09 | 5.35  | 2.67 | 1.43   |
| 0.82  | 1.35  | -0.79 | 2.18  | 0.50 | -0.27  |
| 4.09  | 1.92  | 1.12  | 2.28  | 0.40 | -0.22  |
| 3.52  | 1.35  | 0.78  | 8.03  | 5.35 | 2.86   |
| 2.71  | 0.54  | 0.32  | 1.32  | 1.36 | -0.73  |
| 1.04  | 1.13  | -0.66 | 0.38  | 2.30 | -1.23  |

toxic a,c

|       |       |       |       |       |         |
|-------|-------|-------|-------|-------|---------|
| 0.66  | 1.51  | -0.88 | 0.68  | 2.00  | -1.07   |
| 1.78  | 0.39  | -0.23 | 0.55  | 2.13  | -1.14   |
| 1.35  | 0.82  | -0.48 | 0.45  | 2.23  | -1.19   |
| 6.01  | 3.84  | 2.24  | 2.01  | 0.67  | -0.36 y |
| 4.15  | 1.98  | 1.16  | 4.04  | 1.36  | 0.73    |
| 2.93  | 0.76  | 0.45  | 3.31  | 0.63  | 0.33    |
| 10.70 | 8.53  | 4.97  | 9.68  | 7.00  | 3.74 y  |
| 2.50  | 0.33  | 0.19  | 0.56  | 2.12  | -1.13   |
| 1.41  | 0.76  | -0.44 | 0.80  | 1.88  | -1.01   |
| 1.06  | 1.11  | -0.65 | 1.47  | 1.21  | -0.64   |
| 1.42  | 0.75  | -0.44 | 0.35  | 2.33  | -1.24   |
| 3.65  | 1.48  | 0.86  | 2.38  | 0.30  | -0.16   |
| 1.61  | 0.56  | -0.32 | 1.80  | 0.88  | -0.47   |
| 10.97 | 8.80  | 5.13  | 6.29  | 3.61  | 1.92    |
| 3.77  | 1.60  | 0.93  | 4.64  | 1.96  | 1.04    |
| 6.31  | 4.14  | 2.41  | 6.21  | 3.53  | 1.88 y  |
| 2.20  | 0.03  | 0.02  | 6.98  | 4.30  | 2.30 y  |
| 8.06  | 5.89  | 3.43  | 8.62  | 5.94  | 3.17 y  |
| 12.25 | 10.08 | 5.88  | 8.81  | 6.13  | 3.27 y  |
| 3.02  | 0.85  | 0.49  | 5.76  | 3.08  | 1.64    |
| 4.09  | 1.92  | 1.12  | 2.01  | 0.67  | -0.36   |
| 2.80  | 0.63  | 0.37  | 2.65  | 0.03  | -0.02   |
| 6.02  | 3.85  | 2.24  | 12.12 | 9.44  | 5.04 y  |
| 2.12  | 0.05  | -0.03 | 1.24  | 1.44  | -0.77   |
| 1.39  | 0.78  | -0.46 | 1.72  | 0.96  | -0.51   |
| 3.65  | 1.48  | 0.86  | 2.69  | 0.01  | 0.01    |
| 0.94  | 1.23  | -0.72 | 4.62  | 1.94  | 1.03    |
| 2.56  | 0.39  | 0.23  | 0.94  | 1.74  | -0.93   |
| 1.16  | 1.01  | -0.59 | 1.65  | 1.03  | -0.55   |
| 2.70  | 0.53  | 0.31  | 2.10  | 0.58  | -0.31   |
| 23.71 | 21.54 | 12.56 | 0.71  | 1.97  | -1.05   |
| 9.70  | 7.53  | 4.39  | 10.87 | 8.19  | 4.37 x  |
| 0.99  | 1.18  | -0.69 | 1.42  | 1.26  | -0.67   |
| 1.36  | 0.81  | -0.47 | 1.90  | 0.78  | -0.42   |
| 2.00  | 0.17  | -0.10 | 1.48  | 1.20  | -0.64   |
| 3.87  | 1.70  | 0.99  | 2.04  | 0.64  | -0.34   |
| 1.14  | 1.03  | -0.60 | 2.53  | 0.15  | -0.08   |
| 2.54  | 0.37  | 0.22  | 2.03  | 0.65  | -0.35   |
| 2.90  | 0.73  | 0.43  | 1.75  | 0.93  | -0.50   |
| 1.83  | 0.34  | -0.20 | 0.35  | 2.33  | -1.24   |
| 1.05  | 1.12  | -0.65 | 1.04  | 1.64  | -0.88   |
| 0.47  | 1.70  | -0.99 | 1.65  | 1.03  | -0.55   |
| 5.55  | 3.38  | 1.97  | 8.97  | 6.29  | 3.36 y  |
| 0.65  | 1.52  | -0.89 | 1.09  | 1.59  | -0.85   |
| 4.93  | 2.76  | 1.61  | 7.66  | 4.98  | 2.66    |
| 2.13  | 0.04  | -0.02 | 3.66  | 0.98  | 0.52    |
| 6.56  | 4.39  | 2.56  | 18.03 | 15.35 | 8.19 y  |

toxic a, artifact b

|              |      |       |             |      |        |
|--------------|------|-------|-------------|------|--------|
| 2.99         | 0.82 | 0.48  | 4.09        | 1.41 | 0.75   |
| 2.70         | 0.53 | 0.31  | 2.19        | 0.49 | -0.26  |
| 3.55         | 1.38 | 0.80  | 3.17        | 0.49 | 0.26   |
| 3.17         | 1.00 | 0.58  | 7.72        | 5.04 | 2.69   |
| 3.99         | 1.82 | 1.06  | 11.48       | 8.80 | 4.70   |
| 1.54         | 0.63 | -0.37 | 1.75        | 0.93 | -0.49  |
| 0.63         | 1.54 | -0.90 | 0.43        | 2.25 | -1.20  |
| 4.50         | 2.33 | 1.36  | 3.05        | 0.37 | 0.20   |
| 2.65         | 0.48 | 0.28  | 2.23        | 0.45 | -0.24  |
| 4.21         | 2.04 | 1.19  | 5.58        | 2.90 | 1.55   |
| 6.56         | 4.39 | 2.56  | 3.73        | 1.05 | 0.56   |
| <u>10.28</u> | 8.11 | 4.73  | <u>7.30</u> | 4.62 | 2.47 y |
| 6.72         | 4.55 | 2.65  | 2.27        | 0.41 | -0.22  |
| 3.29         | 1.12 | 0.65  | 3.11        | 0.43 | 0.23   |
| 6.96         | 4.79 | 2.79  | 4.23        | 1.55 | 0.83   |
| 7.64         | 5.47 | 3.19  | 3.85        | 1.17 | 0.63   |
| 2.80         | 0.63 | 0.37  | 2.87        | 0.19 | 0.10   |
| 4.54         | 2.37 | 1.38  | 3.14        | 0.46 | 0.25   |
| 2.41         | 0.24 | 0.14  | 6.47        | 3.79 | 2.02   |
| 1.32         | 0.85 | -0.49 | 1.75        | 0.93 | -0.50  |
| 4.72         | 2.55 | 1.48  | 6.03        | 3.35 | 1.79   |
| 1.70         | 0.47 | -0.27 | 2.32        | 0.36 | -0.19  |
| 1.92         | 0.25 | -0.15 | 3.19        | 0.51 | 0.27   |
| 0.20         | 1.97 | -1.15 | 1.44        | 1.24 | -0.66  |
| 2.20         | 0.03 | 0.02  | 0.99        | 1.69 | -0.90  |
| 0.58         | 1.59 | -0.92 | 2.54        | 0.14 | -0.07  |
| 1.03         | 1.14 | -0.66 | 4.23        | 1.55 | 0.82   |
| 1.04         | 1.13 | -0.66 | 0.86        | 1.82 | -0.97  |
| 1.98         | 0.19 | -0.11 | 3.32        | 0.64 | 0.34   |
| 1.02         | 1.15 | -0.67 | 3.78        | 1.10 | 0.59   |
| 1.05         | 1.12 | -0.65 | 3.03        | 0.35 | 0.19   |
| 0.87         | 1.30 | -0.76 | 6.01        | 3.33 | 1.78   |
| 1.15         | 1.02 | -0.59 | 2.14        | 0.54 | -0.29  |
| 1.36         | 0.81 | -0.47 | 2.31        | 0.37 | -0.20  |
| 5.53         | 3.36 | 1.96  | 9.81        | 7.13 | 3.81 x |
| 2.10         | 0.07 | -0.04 | 6.37        | 3.69 | 1.97   |
| 1.01         | 1.16 | -0.68 | 2.97        | 0.29 | 0.15   |
| 2.61         | 0.44 | 0.26  | 2.59        | 0.09 | -0.05  |
| 0.45         | 1.72 | -1.00 | 3.73        | 1.05 | 0.56   |
| 0.96         | 1.21 | -0.70 | 1.90        | 0.78 | -0.41  |
| 4.28         | 2.11 | 1.23  | 9.39        | 6.71 | 3.58   |
| 0.74         | 1.43 | -0.83 | 2.06        | 0.62 | -0.33  |
| 1.55         | 0.62 | -0.36 | 4.68        | 2.00 | 1.06   |
| 1.52         | 0.65 | -0.38 | 4.84        | 2.16 | 1.15   |
| 2.14         | 0.03 | -0.01 | 3.00        | 0.32 | 0.17   |
| 0.91         | 1.26 | -0.73 | 2.20        | 0.48 | -0.26  |
| 0.93         | 1.24 | -0.72 | 2.81        | 0.13 | 0.07   |

artifact a



|       |       |       |       |       |        |
|-------|-------|-------|-------|-------|--------|
| 0.57  | 1.60  | -0.93 | 2.69  | 0.01  | 0.01   |
| 1.32  | 0.85  | -0.49 | 4.74  | 2.06  | 1.10   |
| 1.68  | 0.49  | -0.28 | 10.80 | 8.12  | 4.33 y |
| 0.43  | 1.74  | -1.01 | 2.24  | 0.44  | -0.24  |
| 5.17  | 3.00  | 1.75  | 5.36  | 2.68  | 1.43   |
| 0.97  | 1.20  | -0.70 | 2.73  | 0.05  | 0.03   |
| 2.96  | 0.79  | 0.46  | 2.10  | 0.58  | -0.31  |
| 4.16  | 1.99  | 1.16  | 3.78  | 1.10  | 0.59   |
| 17.77 | 15.60 | 9.09  | 15.63 | 12.95 | 6.91 y |
| 7.98  | 5.81  | 3.39  | 9.49  | 6.81  | 3.63 y |
| 0.89  | 1.28  | -0.75 | 1.08  | 1.60  | -0.86  |
| 3.07  | 0.90  | 0.52  | 2.87  | 0.19  | 0.10   |
| 4.20  | 2.03  | 1.18  | 4.67  | 1.99  | 1.06   |
| 0.92  | 1.25  | -0.73 | 1.79  | 0.89  | -0.47  |
| 1.82  | 0.35  | -0.20 | 1.40  | 1.28  | -0.69  |
| 2.02  | 0.15  | -0.08 | 1.62  | 1.06  | -0.57  |
| 2.32  | 0.15  | 0.09  | 2.00  | 0.68  | -0.36  |
| 2.39  | 0.22  | 0.13  | 2.87  | 0.19  | 0.10   |
| 1.86  | 0.31  | -0.18 | 1.63  | 1.05  | -0.56  |
| 43.24 | 41.07 | 23.94 | 6.43  | 3.75  | 2.00   |
| 2.90  | 0.73  | 0.43  | 3.50  | 0.82  | 0.44   |
| 1.28  | 0.89  | -0.52 | 4.51  | 1.83  | 0.98   |
| 1.66  | 0.51  | -0.30 | 11.01 | 8.33  | 4.45 y |
| 4.43  | 2.26  | 1.32  | 6.28  | 3.60  | 1.92   |
| 38.18 | 36.01 | 20.99 | 21.29 | 18.61 | 9.93   |
| 14.77 | 12.60 | 7.34  | 3.68  | 1.00  | 0.53   |
| 0.48  | 1.69  | -0.99 | 0.47  | 2.21  | -1.18  |
| 0.78  | 1.39  | -0.81 | 1.90  | 0.78  | -0.42  |
| 1.81  | 0.36  | -0.21 | 3.36  | 0.68  | 0.36   |
| 3.27  | 1.10  | 0.64  | 0.89  | 1.79  | -0.96  |
| 0.74  | 1.43  | -0.83 | 1.36  | 1.32  | -0.71  |
| 4.54  | 2.37  | 1.38  | 7.67  | 4.99  | 2.66 y |
| 5.27  | 3.10  | 1.81  | 10.27 | 7.59  | 4.05 y |
| 0.72  | 1.45  | -0.84 | 1.49  | 1.19  | -0.63  |
| 0.88  | 1.29  | -0.75 | 0.99  | 1.69  | -0.90  |
| 3.41  | 1.24  | 0.72  | 1.56  | 1.12  | -0.60  |
| 1.08  | 1.09  | -0.63 | 0.56  | 2.12  | -1.13  |
| 0.72  | 1.45  | -0.85 | 1.18  | 1.50  | -0.80  |
| 1.90  | 0.27  | -0.16 | 3.13  | 0.45  | 0.24   |
| 1.04  | 1.13  | -0.66 | 3.73  | 1.05  | 0.56   |
| 0.87  | 1.30  | -0.76 | 2.34  | 0.34  | -0.18  |
| 1.01  | 1.16  | -0.67 | 2.91  | 0.23  | 0.12   |
| 2.22  | 0.05  | 0.03  | 8.18  | 5.50  | 2.94 y |
| 2.45  | 0.28  | 0.16  | 3.95  | 1.27  | 0.68   |
| 2.58  | 0.41  | 0.24  | 2.90  | 0.22  | 0.12   |
| 1.09  | 1.08  | -0.63 | 3.38  | 0.70  | 0.37   |
| 8.33  | 6.16  | 3.59  | 2.10  | 0.58  | -0.31  |

|       |       |        |          |          |          |               |
|-------|-------|--------|----------|----------|----------|---------------|
| 2.45  | 0.28  | 0.16   | 7.66     | 4.98     | 2.66     | y             |
| 2.96  | 0.79  | 0.46   | 6.37     | 3.69     | 1.97     |               |
| 1.26  | 0.91  | -0.53  | 3.58     | 0.90     | 0.48     |               |
| 1.38  | 0.79  | -0.46  | 4.30     | 1.62     | 0.86     |               |
| 3.27  | 1.10  | 0.64   | 0.61     | 2.07     | -1.10    |               |
| 1.18  | 0.99  | -0.57  | 1.80     | 0.88     | -0.47    |               |
| 0.85  | 1.32  | -0.77  | 3.76     | 1.08     | 0.57     |               |
| 0.58  | 1.59  | -0.93  | 1.77     | 0.91     | -0.49    |               |
| 3.01  | 0.84  | 0.49   | 7.18     | 4.50     | 2.40     |               |
| 0.81  | 1.36  | -0.79  | 4.69     | 2.01     | 1.08     |               |
| 2.02  | 0.15  | -0.09  | 4.48     | 1.80     | 0.96     |               |
| 0.37  | 1.80  | -1.05  | 1.94     | 0.74     | -0.40    |               |
| 1.10  | 1.07  | -0.62  | 2.48     | 0.20     | -0.11    |               |
| 4.83  | 2.66  | 1.55   | 2.63     | 0.05     | -0.03    |               |
| 5.06  | 2.89  | 1.68   | 4.05     | 1.37     | 0.73     |               |
| 0.97  | 1.20  | -0.70  | 2.83     | 0.15     | 0.08     |               |
| 1.92  | 0.25  | -0.14  | 1.81     | 0.87     | -0.46    |               |
| 0.56  | 1.61  | -0.94  | 4.68     | 2.00     | 1.07     |               |
| 1.06  | 1.11  | -0.64  | 5.36     | 2.68     | 1.43     |               |
| 12.90 | 10.73 | 6.26   | 1.35     | 1.33     | -0.71    | x toxic a,b,c |
| 1.66  | 0.51  | -0.30  | 0.92     | 1.76     | -0.94    |               |
| 1.12  | 1.05  | -0.61  | 1.72     | 0.96     | -0.51    |               |
| 7.62  | 5.45  | 3.18   | 2.04     | 0.64     | -0.34    |               |
| 3.51  | 1.34  | 0.78   | 3.00     | 0.32     | 0.17     |               |
| 1.46  | 0.71  | -0.41  | 2.83     | 0.15     | 0.08     |               |
| 1.41  | 0.76  | -0.45  | 5.30     | 2.62     | 1.40     |               |
| 3.85  | 1.68  | 0.98   | 1.57     | 1.11     | -0.59    |               |
| 2.47  | 0.30  | 0.18   | 7.93     | 5.25     | 2.80     |               |
| 2.78  | 0.61  | 0.36   | 3.89     | 1.21     | 0.65     |               |
| 4.72  | 2.55  | 1.49   | 0.89     | 1.79     | -0.95    |               |
| 2.56  | 0.39  | 0.23   | 2.38     | 0.30     | -0.16    |               |
| 3.50  | 1.33  | 0.77   | 2.12     | 0.56     | -0.30    |               |
| 1.76  | 0.41  | -0.24  | 5.76     | 3.08     | 1.65     |               |
| 3.64  | 1.47  | 0.86   | 1.60     | 1.08     | -0.58    |               |
| 1.86  | 0.31  | -0.18  | 1.24     | 1.44     | -0.77    |               |
| 4.33  | 2.16  | 1.26   | 3.82     | 1.14     | 0.61     |               |
| 0.73  | 1.44  | -0.84  | 1.75     | 0.93     | -0.49    |               |
| 2.05  | 0.12  | -0.07  | 3.52     | 0.84     | 0.45     |               |
| 3.75  | 1.58  | 0.92   | 2.50     | 0.18     | -0.10    |               |
| 2.17  | 1.16  |        | 2.68     | 1.27     |          |               |
|       | 3.48  |        |          | 3.80     |          |               |
|       | 1.72  |        |          | 1.87     |          |               |
|       |       |        | <b>A</b> | <b>B</b> | <b>C</b> |               |
|       | 22.53 | 3psSD  | 14.30    | 8.37     | 3.77     |               |
|       | 20.06 | 3ngSD  | 1.90     | 4.95     | 2.76     |               |
|       | 22.89 | SumSD  | 16.20    | 13.32    | 6.53     |               |
|       |       | DiffMn | 16.14    | 12.22    | 20.50    |               |

|       |           |      |       |      |
|-------|-----------|------|-------|------|
| 21.83 | SmovrDiff | 1.00 | 1.09  | 0.32 |
| 1.26  | 1minus    | 0.00 | -0.09 | 0.68 |

0.96

1.29

0.44

2.60

1.32

0.92

4.25

1.41

3.80

1.74

9.72

13.69

|          |     |                             |           | <u>% inf</u> | <u>abs dev</u> | <u>robust Z</u> |             |
|----------|-----|-----------------------------|-----------|--------------|----------------|-----------------|-------------|
| 50011.00 | A02 | M-016603- nudix (nucleosi   | 11163.00  | NUDT4        | 1.48           | 1.15            | -0.51       |
| 50011.00 | A04 | M-005218- nudix (nucleosi   | 4521.00   | NUDT1        | 1.23           | 1.40            | -0.62       |
| 50011.00 | A05 | M-008594- phosphoribosyl    | 2618.00   | GART         | 2.31           | 0.32            | -0.14       |
| 50011.00 | A06 | M-008217- 5'-nucleotidase   | 4907.00   | NT5E         | 4.61           | 1.98            | 0.87        |
| 50011.00 | A07 | M-008900- glycine amidinc   | 2628.00   | GATM         | 7.86           | <b>5.23</b>     | <b>2.30</b> |
| 50011.00 | A08 | M-032020- 5'-nucleotidase   | 51251.00  | NT5C3        | 3.54           | 0.91            | 0.40        |
| 50011.00 | A09 | M-006366- glucosidase, be   | 2629.00   | GBA          | 0.39           | 2.24            | -0.98       |
| 50011.00 | A10 | M-019484- neuropilin 1      | 8829.00   | NRP1         | 5.81           | 3.18            | 1.40        |
| 50011.00 | A11 | M-004039- glutaryl-Coenzy   | 2639.00   | GCDH         | 1.12           | 1.51            | -0.67       |
| 50011.00 | A12 | M-005133- NAD(P)H dehyd     | 1728.00   | NQO1         | 3.09           | 0.46            | 0.20        |
| 50011.00 | A13 | M-010328- GTP cyclohydro    | 2643.00   | GCH1         | 1.42           | 1.21            | -0.53       |
| 50011.00 | A14 | M-009579- nucleoside pho    | 4860.00   | NP           | 2.28           | 0.35            | -0.16       |
| 50011.00 | A15 | M-017411- glucosaminyl (N   | 2651.00   | GCNT2        | 2.03           | 0.60            | -0.27       |
| 50011.00 | A16 | M-009809- nicotinamide ni   | 23530.00  | NNT          | 3.72           | 1.09            | 0.48        |
| 50011.00 | A17 | M-017907- glycine cleavag   | 2653.00   | GCSH         | 1.21           | 1.42            | -0.62       |
| 50011.00 | A18 | M-010351- nicotinamide N    | 4837.00   | NNMT         | 1.48           | 1.15            | -0.51       |
| 50011.00 | A19 | M-009856- gamma-glutam      | 2677.00   | GGCX         | 0.89           | 1.74            | -0.76       |
| 50011.00 | A20 | M-017902- nitrilase family, | 56954.00  | NIT2         | 1.13           | 1.50            | -0.66       |
| 50011.00 | A21 | M-005883- gamma-glutam      | 8836.00   | GGH          | 3.57           | 0.94            | 0.41        |
| 50011.00 | A23 | M-016477- geranylgeranyl    | 9453.00   | GGPS1        | 3.90           | 1.27            | 0.56        |
| 50011.00 | B02 | M-009134- ubiquitin-conju   | 7328.00   | UBE2H        | 3.42           | 0.79            | 0.34        |
| 50011.00 | B04 | M-009095- ubiquitin-conju   | 7327.00   | UBE2G2       | 1.28           | 1.35            | -0.59       |
| 50011.00 | B05 | M-011096- ornithine aminc   | 4942.00   | OAT          | 3.22           | 0.59            | 0.26        |
| 50011.00 | B06 | M-008845- ubiquitin-conju   | 10477.00  | UBE2E3       | 3.59           | 0.96            | 0.42        |
| 50011.00 | B07 | M-006668- ornithine decar   | 4953.00   | ODC1         | 2.92           | 0.29            | 0.13        |
| 50011.00 | B08 | M-008850- ubiquitin-conju   | 7324.00   | UBE2E1       | 1.70           | 0.93            | -0.41       |
| 50011.00 | B09 | M-009679- oxoglutarate (a   | 4967.00   | OGDH         | 0.85           | 1.78            | -0.78       |
| 50011.00 | B10 | M-008478- ubiquitin-conju   | 7323.00   | UBE2D3       | 0.62           | 2.01            | -0.88       |
| 50011.00 | B11 | M-004045- 3-oxoacid CoA t   | 5019.00   | OXCT1        | 1.44           | 1.19            | -0.52       |
| 50011.00 | B12 | M-010383- ubiquitin-conju   | 7322.00   | UBE2D2       | 1.48           | 1.15            | -0.50       |
| 50011.00 | B13 | M-012187- 26 serine prote   | 8909.00   | P11          | 1.72           | 0.91            | -0.40       |
| 50011.00 | B14 | M-004693- ubiquitin-conju   | 11065.00  | UBE2C        | 0.56           | 2.07            | -0.91       |
| 50011.00 | B15 | M-004275- procollagen-prc   | 5033.00   | P4HA1        | 0.86           | 1.77            | -0.78       |
| 50011.00 | B16 | M-009930- ubiquitin-conju   | 7320.00   | UBE2B        | 1.46           | 1.17            | -0.51       |
| 50011.00 | B17 | M-003690- procollagen-prc   | 5034.00   | P4HB         | 0.39           | 2.24            | -0.98       |
| 50011.00 | B18 | M-009424- ubiquitin-conju   | 7319.00   | UBE2A        | 4.80           | 2.17            | 0.95        |
| 50011.00 | B19 | M-016646- pyrroline-5-carl  | 29920.00  | PYCR2        | 0.78           | 1.85            | -0.81       |
| 50011.00 | B20 | M-005249- ubiquitin-activa  | 9039.00   | UBE1C        | 0.12           | 2.51            | -1.10       |
| 50011.00 | B21 | M-008860- proliferation-as  | 5036.00   | PA2G4        | 0.78           | 1.85            | -0.82       |
| 50011.00 | B23 | M-005983- proprotein con    | 5046.00   | PCSK6        | 0.65           | 1.98            | -0.87       |
| 50011.00 | C02 | M-011092- sialidase 1 (lyso | 4758.00   | NEU1         | 1.97           | 0.66            | -0.29       |
| 50011.00 | C04 | M-012589- NADH dehydro      | 4729.00   | NDUFV2       | 3.26           | 0.63            | 0.28        |
| 50011.00 | C05 | M-012538- galactosidase, a  | 2717.00   | GLA          | 1.11           | 1.52            | -0.67       |
| 50011.00 | C06 | M-031021- NADH dehydro      | 374291.00 | NDUFS7       | 1.61           | 1.02            | -0.45       |
| 50011.00 | C07 | M-012539- galactosidase, k  | 2720.00   | GLB1         | 0.65           | 1.98            | -0.87       |
| 50011.00 | C08 | M-019602- NADH dehydro      | 4724.00   | NDUFS4       | 2.15           | 0.48            | -0.21       |

|                     |                                  |                |              |              |             |             |
|---------------------|----------------------------------|----------------|--------------|--------------|-------------|-------------|
| 50011.00 C09        | M-009305- glycine dehydr         | 2731.00        | GLDC         | 0.77         | 1.86        | -0.82       |
| 50011.00 C10        | M-015770- NADH dehydrog          | 4720.00        | NDUFS2       | 1.22         | 1.41        | -0.62       |
| 50011.00 C11        | M-021332- glutaredoxin 2         | 51022.00       | GLRX2        | 0.92         | 1.71        | -0.75       |
| 50011.00 C12        | M-008296- N-deacetylase/         | 64579.00       | NDST4        | 0.51         | 2.12        | -0.93       |
| 50011.00 C13        | M-008430- glutamate-amn          | 51557.00       | GLULD1       | 0.40         | 2.23        | -0.98       |
| 50011.00 C14        | M-017151- trimethylguano         | 96764.00       | TGS1         | 0.62         | 2.01        | -0.88       |
| 50011.00 C15        | M-008258- guanosine mon          | 2766.00        | GMPR         | 0.60         | 2.03        | -0.89       |
| 50011.00 C16        | M-009347- cytochrome b5          | 51167.00       | CYB5R4       | 0.43         | 2.20        | -0.97       |
| 50011.00 C17        | M-009583- guanosine mon          | 51292.00       | GMPR2        | 0.47         | 2.16        | -0.95       |
| 50011.00 C18        | M-008399- N-acetyltransfe        | 9027.00        | NAT8         | 1.65         | 0.98        | -0.43       |
| <b>50011.00 C19</b> | <b>M-016084- guanine nucleo</b>  | <b>2790.00</b> | <b>GNG10</b> | <b>2.89</b>  | <b>0.26</b> | <b>0.11</b> |
| 50011.00 C20        | M-008560- N-acetyltransfe        | 10.00          | NAT2         | 0.84         | 1.79        | -0.79       |
| 50011.00 C21        | M-009894- glyceronephos          | 8443.00        | GNPAT        | 1.03         | 1.60        | -0.70       |
| 50011.00 C23        | M-004995- glucosamine-6-         | 10007.00       | GNPDA1       | 0.27         | 2.36        | -1.04       |
| 50011.00 D02        | M-004509- ubiquitin-activa       | 7317.00        | UBE1         | 0.73         | 1.90        | -0.83       |
| 50011.00 D04        | M-008616- ubiquitin associ       | 53347.00       | UBASH3A      | 11.08        | 8.45        | 3.71        |
| 50011.00 D05        | M-008797- platelet-activat       | 5049.00        | PAFAH1B2     | 6.96         | 4.33        | 1.90        |
| 50011.00 D06        | M-012556- tyrosinase-relat       | 7306.00        | TYRP1        | 3.10         | 0.47        | 0.21        |
| 50011.00 D07        | M-009443- platelet-activat       | 5050.00        | PAFAH1B3     | 0.72         | 1.91        | -0.84       |
| <b>50011.00 D08</b> | <b>M-012555- tyrosinase (ocu</b> | <b>7299.00</b> | <b>TYR</b>   | <b>11.99</b> | <b>9.36</b> | <b>4.11</b> |
| 50011.00 D09        | M-009824- propionyl Coen         | 5096.00        | PCCB         | 0.76         | 1.87        | -0.82       |
| 50011.00 D10        | M-010676- thioredoxin dor        | 81567.00       | TXNDC5       | 3.68         | 1.05        | 0.46        |
| 50011.00 D11        | M-005985- proprotein con         | 5122.00        | PCSK1        | 0.73         | 1.90        | -0.84       |
| 50011.00 D12        | M-005394- transformation,        | 8295.00        | TRRAP        | 1.07         | 1.56        | -0.69       |
| 50011.00 D13        | M-005988- proprotein con         | 9159.00        | PCSK7        | 1.10         | 1.53        | -0.67       |
| 50011.00 D14        | M-010895- thiopurine S-me        | 7172.00        | TPMT         | 6.65         | 4.02        | 1.76        |
| 50011.00 D15        | M-011912- apoptosis-induc        | 9131.00        | AIFM1        | 2.52         | 0.11        | -0.05       |
| 50011.00 D16        | M-009776- triosephosphat         | 7167.00        | TPI1         | 3.23         | 0.60        | 0.26        |
| 50011.00 D17        | M-007644- phosphodiester         | 5138.00        | PDE2A        | 1.52         | 1.11        | -0.49       |
| 50011.00 D18        | M-006049- transmembran           | 64699.00       | TMPRSS3      | 0.55         | 2.08        | -0.92       |
| 50011.00 D19        | M-007645- phosphodiester         | 5139.00        | PDE3A        | 2.84         | 0.21        | 0.09        |
| 50011.00 D20        | M-005744- transmembran           | 7108.00        | TM7SF2       | 1.05         | 1.58        | -0.69       |
| 50011.00 D21        | M-007646- phosphodiester         | 5140.00        | PDE3B        | 1.42         | 1.21        | -0.53       |
| 50011.00 D23        | M-007647- phosphodiester         | 5141.00        | PDE4A        | 0.68         | 1.95        | -0.86       |
| 50011.00 E02        | M-012543- N-acetylglucos         | 4669.00        | NAGLU        | 2.32         | 0.31        | -0.14       |
| 50011.00 E04        | M-010066- 5-methyltetrah         | 4552.00        | MTRR         | 8.87         | 6.24        | 2.74        |
| 50011.00 E05        | M-008226- glucosamine (N         | 2799.00        | GNS          | 8.95         | 6.32        | 2.78        |
| 50011.00 E06        | M-010349- 5,10-methylene         | 4524.00        | MTHFR        | 5.64         | 3.01        | 1.32        |
| 50011.00 E07        | M-015811- gephyrin               | 10243.00       | GPHN         | 4.26         | 1.63        | 0.72        |
| 50011.00 E08        | M-009539- methylthioader         | 4507.00        | MTAP         | 1.74         | 0.89        | -0.39       |
| 50011.00 E09        | M-008253- glyoxylate redu        | 9380.00        | GRHPR        | 4.51         | 1.88        | 0.83        |
| 50011.00 E10        | M-012464- methionine sull        | 4482.00        | MSRA         | 5.97         | 3.34        | 1.47        |
| 50011.00 E11        | M-003674- protein disulfid       | 2923.00        | PDIA3        | 9.53         | 6.90        | 3.03        |
| 50011.00 E12        | M-013207- mitochondrial r        | 10884.00       | MRPS30       | 3.15         | 0.52        | 0.23        |
| 50011.00 E13        | M-020112- ATG7 autophag          | 10533.00       | ATG7         | 8.92         | 6.29        | 2.76        |
| 50011.00 E14        | M-019115- molybdenum c           | 4338.00        | MOCS2        | 2.93         | 0.30        | 0.13        |
| 50011.00 E15        | M-011176- glutathione S-tr       | 2938.00        | GSTA1        | 2.00         | 0.63        | -0.28       |

|                     |                                   |                 |                       |                     |              |             |
|---------------------|-----------------------------------|-----------------|-----------------------|---------------------|--------------|-------------|
| 50011.00 E16        | M-012180- molybdenum c            | 4337.00         | MOCS1                 | 6.91                | 4.28         | 1.88        |
| 50011.00 E17        | M-011118- glutathione S-tr        | 2944.00         | GSTM1                 | 0.82                | 1.81         | -0.79       |
| 50011.00 E18        | M-005966- matrix metallo          | 64066.00        | MMP27                 | 2.04                | 0.59         | -0.26       |
| 50011.00 E19        | M-017472- glutathione S-tr        | 2947.00         | GSTM3                 | 2.09                | 0.54         | -0.24       |
| 50011.00 E20        | M-005961- matrix metallo          | 118856.00       | MMP21                 | 3.22                | 0.59         | 0.26        |
| 50011.00 E21        | M-011950- glutathione S-tr        | 9446.00         | GSTO1                 | 6.50                | 3.87         | 1.70        |
| 50011.00 E23        | M-006730- guanylate cycla         | 2977.00         | GUCY1A2               | 1.29                | 1.34         | -0.59       |
| 50011.00 F02        | M-008653- acyl-CoA thioes         | 26027.00        | ACOT11                | 0.26                | 2.37         | -1.04       |
| 50011.00 F04        | M-003941- transferrin rece        | 7037.00         | TFRC                  | 2.79                | 0.16         | 0.07        |
| 50011.00 F05        | M-007648- phosphodiester          | 5142.00         | PDE4B                 | 6.07                | 3.44         | 1.51        |
| 50011.00 F06        | M-009686- transferrin rece        | 7036.00         | TFR2                  | 4.77                | 2.14         | 0.94        |
| 50011.00 F07        | M-007649- phosphodiester          | 5143.00         | PDE4C                 | 1.75                | 0.88         | -0.39       |
| <b>50011.00 F08</b> | <b>M-014046- transcription fa</b> | <b>64216.00</b> | <b><u>TFB2M</u></b>   | <b><u>13.21</u></b> | <b>10.58</b> | <b>4.65</b> |
| 50011.00 F09        | M-004757- phosphodiester          | 5144.00         | PDE4D                 | 2.38                | 0.25         | -0.11       |
| 50011.00 F10        | M-021007- transcription fa        | 51106.00        | TFB1M                 | 8.47                | <b>5.84</b>  | <b>2.57</b> |
| 50011.00 F11        | M-004310- phosphodiester          | 5147.00         | PDE6D                 | 1.75                | 0.88         | -0.39       |
| 50011.00 F12        | M-016112- tyrosyl-DNA ph          | 55775.00        | TDP1                  | 0.84                | 1.79         | -0.79       |
| 50011.00 F13        | M-003818- phosphodiester          | 5150.00         | PDE7A                 | 1.87                | 0.76         | -0.34       |
| 50011.00 F14        | M-009324- thromboxane A           | 6916.00         | TBXAS1                | 1.90                | 0.73         | -0.32       |
| 50011.00 F15        | M-007659- phosphodiester          | 27115.00        | PDE7B                 | 5.14                | 2.51         | 1.10        |
| 50011.00 F16        | M-009608- tafazzin (cardio        | 6901.00         | TAZ                   | 1.53                | 1.10         | -0.48       |
| 50011.00 F17        | M-010529- platelet-derivec        | 5157.00         | PDGFRL                | 0.77                | 1.86         | -0.82       |
| 50011.00 F18        | M-008996- transaldolase 1         | 6888.00         | TALDO1                | 3.02                | 0.39         | 0.17        |
| 50011.00 F19        | M-010329- pyruvate dehyd          | 5160.00         | PDHA1                 | 3.98                | 1.35         | 0.59        |
| 50011.00 F20        | M-012624- synaptojanin 2          | 8871.00         | SYNJ2                 | 1.45                | 1.19         | -0.52       |
| 50011.00 F21        | M-023925- pyruvate dehyd          | 5161.00         | PDHA2                 | 3.23                | 0.60         | 0.26        |
| 50011.00 F23        | M-008803- pyruvate dehyd          | 5162.00         | PDHB                  | 0.06                | 2.57         | -1.13       |
| 50011.00 G02        | M-009626- malonyl-CoA de          | 23417.00        | MLYCD                 | 7.65                | <b>5.02</b>  | <b>2.20</b> |
| <b>50011.00 G04</b> | <b>M-009248- microsomal glu</b>   | <b>4257.00</b>  | <b><u>MGST1</u></b>   | <b><u>12.21</u></b> | <b>9.58</b>  | <b>4.21</b> |
| 50011.00 G05        | M-006731- guanylate cycla         | 2982.00         | GUCY1A3               | 6.39                | 3.76         | 1.65        |
| 50011.00 G06        | M-012805- meningioma ex           | 10724.00        | MGEA5                 | 3.89                | 1.26         | 0.55        |
| <b>50011.00 G07</b> | <b>M-006733- guanylate cycla</b>  | <b>2983.00</b>  | <b><u>GUCY1B3</u></b> | <b><u>13.62</u></b> | <b>10.99</b> | <b>4.83</b> |
| 50011.00 G08        | M-010187- short-chain deh         | 79154.00        | MGC4172               | 2.87                | 0.24         | 0.10        |
| 50011.00 G09        | M-012541- glucuronidase,          | 2990.00         | GUSB                  | 1.75                | 0.88         | -0.39       |
| 50011.00 G10        | M-016736- beta-1,3-N-ace          | 148789.00       | B3GALNT2              | 7.16                | 4.53         | 1.99        |
| 50011.00 G11        | M-017726- glycogen synth          | 2997.00         | GYS1                  | 3.61                | 0.98         | 0.43        |
| 50011.00 G12        | M-015781- chitinase doma          | 66005.00        | CHID1                 | 5.72                | 3.09         | 1.36        |
| 50011.00 G13        | M-012702- glycogen synth          | 2998.00         | GYS2                  | 1.34                | 1.29         | -0.57       |
| 50011.00 G14        | M-012441- mannosyl (alph          | 11320.00        | MGAT4A                | 3.53                | 0.90         | 0.39        |
| <b>50011.00 G15</b> | <b>M-005888- granzyme A (gr</b>   | <b>3001.00</b>  | <b><u>GZMA</u></b>    | <b><u>10.99</u></b> | <b>8.36</b>  | <b>3.67</b> |
| 50011.00 G16        | M-008751- monoacylglycer          | 80168.00        | MOGAT2                | 2.60                | 0.03         | -0.02       |
| 50011.00 G17        | M-005889- granzyme B (gr          | 3002.00         | GZMB                  | 5.28                | 2.65         | 1.16        |
| 50011.00 G18        | M-008693- methionyl amir          | 23173.00        | METAP1                | 3.89                | 1.26         | 0.55        |
| <b>50011.00 G19</b> | <b>M-008448- NAD(P) depend</b>    | <b>50814.00</b> | <b><u>NSDHL</u></b>   | <b><u>9.03</u></b>  | <b>6.40</b>  | <b>2.81</b> |
| 50011.00 G20        | M-009690- mesoderm spec           | 4232.00         | MEST                  | 6.36                | 3.73         | 1.64        |
| 50011.00 G21        | M-011964- H2A histone far         | 9555.00         | H2AFY                 | 8.91                | <b>6.28</b>  | <b>2.76</b> |
| 50011.00 G23        | M-009470- hydroxyacyl-Co          | 3030.00         | HADHA                 | 2.80                | 0.17         | 0.07        |

|              |                            |                       |              |       |       |
|--------------|----------------------------|-----------------------|--------------|-------|-------|
| 50011.00 H02 | M-011786- surfeit 1        | 6834.00 SURF1         | 8.27         | 5.64  | 2.48  |
| 50011.00 H04 | M-008990- sulfotransferase | 6817.00 SULT1A1       | 1.75         | 0.88  | -0.39 |
| 50011.00 H05 | M-019829- protein disulfid | 64714.00 <u>PDIA2</u> | <u>11.32</u> | 8.69  | 3.82  |
| 50011.00 H06 | M-006642- sulfatase 2      | 55959.00 SULF2        | 6.60         | 3.97  | 1.74  |
| 50011.00 H07 | M-019826- protein disulfid | 10954.00 PDIA5        | 6.31         | 3.68  | 1.61  |
| 50011.00 H08 | M-010538- suppression of   | 6764.00 <u>ST5</u>    | <u>15.69</u> | 13.06 | 5.74  |
| 50011.00 H09 | M-009505- pyruvate dehyd   | 55066.00 PDPR         | 5.80         | 3.17  | 1.39  |
| 50011.00 H10 | M-003712- suppression of   | 6768.00 <u>ST14</u>   | <u>12.28</u> | 9.65  | 4.24  |
| 50011.00 H11 | M-009855- peroxisomal tra  | 55825.00 PECCR        | 2.62         | 0.01  | -0.01 |
| 50011.00 H12 | M-006669- spermidine syn   | 6723.00 SRM           | 7.34         | 4.71  | 2.07  |
| 50011.00 H13 | M-017815- progressive ext  | 56652.00 <u>PEO1</u>  | <u>6.46</u>  | 3.83  | 1.68  |
| 50011.00 H14 | M-004210- steroid-5-alpha  | 6716.00 SRD5A2        | 4.75         | 2.12  | 0.93  |
| 50011.00 H15 | M-008883- phosphoglycer    | 5223.00 PGAM1         | 2.23         | 0.40  | -0.18 |
| 50011.00 H16 | M-004211- steroid-5-alpha  | 6715.00 SRD5A1        | 2.14         | 0.49  | -0.22 |
| 50011.00 H17 | M-008703- protein geranyl  | 5229.00 PGGT1B        | 4.12         | 1.49  | 0.66  |
| 50011.00 H18 | M-009646- squalene epoxi   | 6713.00 SQLE          | 4.61         | 1.98  | 0.87  |
| 50011.00 H19 | M-007674- phosphorylase    | 5257.00 <u>PHKB</u>   | <u>8.94</u>  | 6.31  | 2.77  |
| 50011.00 H20 | M-006673- serine palmitoy  | 10558.00 SPTLC1       | 6.23         | 3.60  | 1.58  |
| 50011.00 H21 | M-018421- phosphatase, o   | 162466.00 PHOSPHO1    | 4.67         | 2.04  | 0.89  |
| 50011.00 H23 | M-016904- phosphohistidir  | 29085.00 PHPT1        | 3.71         | 1.08  | 0.47  |
| 50011.00 I02 | M-009348- malic enzyme 1   | 4199.00 ME1           | 6.74         | 4.11  | 1.81  |
| 50011.00 I04 | M-004905- methylcrotono    | 64087.00 MCCC2        | 1.56         | 1.07  | -0.47 |
| 50011.00 I05 | M-008298- hydroxyacyl-Co   | 3033.00 <u>HADH</u>   | <u>12.07</u> | 9.44  | 4.15  |
| 50011.00 I06 | M-005939- membrane-bou     | 8720.00 MBTPS1        | 7.67         | 5.04  | 2.21  |
| 50011.00 I07 | M-012052- hydroxyacylglut  | 3029.00 HAGH          | 6.41         | 3.78  | 1.66  |
| 50011.00 I08 | M-013779- enolase-phosph   | 58478.00 ENOPH1       | 6.82         | 4.19  | 1.84  |
| 50011.00 I09 | M-011685- histidine ammo   | 3034.00 HAL           | 4.98         | 2.35  | 1.03  |
| 50011.00 I10 | M-004771- mitogen-activa   | 23118.00 MAP3K7IP2    | 4.29         | 1.66  | 0.73  |
| 50011.00 I11 | M-005894- transmembran     | 9407.00 TMPRSS11I     | 2.63         | 0.00  | 0.00  |
| 50011.00 I12 | M-009369- monoamine oxi    | 4128.00 MAOA          | 1.85         | 0.78  | -0.34 |
| 50011.00 I13 | M-011049- hexosaminidase   | 3073.00 HEXA          | 2.39         | 0.24  | -0.10 |
| 50011.00 I14 | M-012175- mannosidase, b   | 4126.00 MANBA         | 5.37         | 2.74  | 1.20  |
| 50011.00 I15 | M-011050- hexosaminidase   | 3074.00 HEXB          | 7.52         | 4.89  | 2.15  |
| 50011.00 I16 | M-009650- mannosidase, a   | 4125.00 MAN2B1        | 5.00         | 2.37  | 1.04  |
| 50011.00 I17 | M-009823- homogentisate    | 3081.00 HGD           | 9.63         | 7.00  | 3.08  |
| 50011.00 I18 | M-009806- mannosidase, a   | 4124.00 MAN2A1        | 1.71         | 0.92  | -0.41 |
| 50011.00 I19 | M-005895- HGF activator    | 3083.00 HGFAC         | 1.42         | 1.21  | -0.53 |
| 50011.00 I20 | M-009622- lysophospholip   | 23659.00 LYPLA3       | 4.87         | 2.24  | 0.98  |
| 50011.00 I21 | M-004073- hypoxia-inducik  | 55662.00 HIF1AN       | 3.61         | 0.98  | 0.43  |
| 50011.00 I23 | M-006479- holocarboxylas   | 3141.00 HLCS          | 1.73         | 0.90  | -0.40 |
| 50011.00 J02 | M-009873- sepiapterin red  | 6697.00 SPR           | 4.32         | 1.69  | 0.74  |
| 50011.00 J04 | M-008790- sterol O-acyltra | 8435.00 SOAT2         | 1.15         | 1.48  | -0.65 |
| 50011.00 J05 | M-011752- phosphatidylin   | 5277.00 PIGA          | 7.03         | 4.40  | 1.93  |
| 50011.00 J06 | M-006678- sphingomyelin    | 55512.00 SMPD3        | 1.64         | 0.99  | -0.43 |
| 50011.00 J07 | M-005250- phosphoinositic  | 5289.00 PIK3C3        | 2.47         | 0.16  | -0.07 |
| 50011.00 J08 | M-006676- sphingomyelin    | 6609.00 SMPD1         | 2.80         | 0.17  | 0.08  |
| 50011.00 J09 | M-006775- phosphoinositic  | 5293.00 PIK3CD        | 2.85         | 0.22  | 0.09  |



|              |                                |                         |              |              |       |
|--------------|--------------------------------|-------------------------|--------------|--------------|-------|
| 50011.00 J10 | M-027285- SMA4                 | 11039.00 SMA4           | 0.83         | 1.80         | -0.79 |
| 50011.00 J11 | M-004058- phosphatidylinc      | 8395.00 PIP5K1B         | 3.46         | 0.83         | 0.37  |
| 50011.00 J12 | M-007575- solute carrier fa    | 6519.00 SLC3A1          | 0.47         | 2.16         | -0.95 |
| 50011.00 J13 | M-004782- phosphatidylinc      | 23396.00 PIP5K1C        | 7.04         | 4.41         | 1.94  |
| 50011.00 J14 | M-007498- solute carrier fa    | 11001.00 <u>SLC27A2</u> | <u>13.02</u> | <u>10.39</u> | 4.57  |
| 50011.00 J15 | M-005058- phosphatidylinc      | 200576.00 PIP5K3        | 1.94         | 0.69         | -0.30 |
| 50011.00 J16 | M-015817- protein arginine     | 10419.00 <u>PRMT5</u>   | <u>12.37</u> | <u>9.74</u>  | 4.28  |
| 50011.00 J17 | M-009886- phospholipase        | 5321.00 PLA2G4A         | 3.60         | 0.97         | 0.43  |
| 50011.00 J18 | M-011546- ST3 beta-galact      | 8869.00 ST3GAL5         | 4.70         | 2.07         | 0.91  |
| 50011.00 J19 | M-005999- plasminogen ac       | 5327.00 PLAT            | 2.13         | 0.50         | -0.22 |
| 50011.00 J20 | M-019206- ST3 beta-galact      | 6482.00 <u>ST3GAL1</u>  | <u>7.94</u>  | <u>5.31</u>  | 2.33  |
| 50011.00 J21 | M-006000- plasminogen ac       | 5328.00 PLAU            | 4.39         | 1.76         | 0.77  |
| 50011.00 J23 | M-008485- phospholipase        | 5331.00 PLCB3           | 1.93         | 0.70         | -0.31 |
| 50011.00 K02 | M-009256- lysophospholipi      | 11313.00 LYPLA2         | 4.82         | 2.19         | 0.96  |
| 50011.00 K04 | M-010007- lysophospholipi      | 10434.00 LYPLA1         | 3.57         | 0.94         | 0.41  |
| 50011.00 K05 | M-016220- hydroxymethyl        | 3145.00 HMBS            | 5.06         | 2.43         | 1.07  |
| 50011.00 K06 | M-008624- lanosterol synt      | 4047.00 LSS             | 3.57         | 0.94         | 0.41  |
| 50011.00 K07 | M-019290- 3-hydroxymeth        | 3155.00 HMGCL           | 5.40         | 2.77         | 1.22  |
| 50011.00 K08 | M-010272- lecithin retinol     | 9227.00 LRAT            | 5.94         | 3.31         | 1.46  |
| 50011.00 K09 | M-009811- 3-hydroxy-3-me       | 3156.00 <u>HMGCR</u>    | <u>9.02</u>  | <u>6.39</u>  | 2.81  |
| 50011.00 K10 | M-005930- X-prolyl amino       | 63929.00 XPNPEP3        | 0.40         | 2.23         | -0.98 |
| 50011.00 K11 | M-009808- 3-hydroxy-3-me       | 3157.00 HMGCS1          | 7.29         | <u>4.66</u>  | 2.05  |
| 50011.00 K12 | M-009435- ubiquitin-conju      | 51619.00 UBE2D4         | 4.93         | 2.30         | 1.01  |
| 50011.00 K13 | M-010179- 3-hydroxy-3-me       | 3158.00 HMGCS2          | 2.20         | 0.43         | -0.19 |
| 50011.00 K14 | M-018979- carboxymethyl        | 134147.00 CMBL          | 8.38         | <u>5.75</u>  | 2.53  |
| 50011.00 K15 | M-006372- heme oxygenas        | 3162.00 HMOX1           | 6.27         | 3.64         | 1.60  |
| 50011.00 K16 | M-005925- leishmanolysin       | 89782.00 LMLN           | 6.84         | 4.21         | 1.85  |
| 50011.00 K17 | M-009630- heme oxygenas        | 3163.00 HMOX2           | 2.76         | 0.13         | 0.06  |
| 50011.00 K18 | M-004043- lipase A, lysoso     | 3988.00 LIPA            | 12.57        | <u>9.94</u>  | 4.37  |
| 50011.00 K19 | M-008488- histamine N-me       | 3176.00 HNMT            | 2.79         | 0.16         | 0.07  |
| 50011.00 K20 | M-018950- phospholysine        | 64077.00 LHPP           | 4.87         | 2.24         | 0.99  |
| 50011.00 K21 | M-004033- protein arginine     | 3275.00 PRMT2           | 0.68         | 1.95         | -0.86 |
| 50011.00 K23 | M-010102- protein arginine     | 3276.00 PRMT1           | 3.42         | 0.79         | 0.35  |
| 50011.00 L02 | M-010486- ST6 beta-galact      | 6480.00 ST6GAL1         | 0.22         | 2.41         | -1.06 |
| 50011.00 L04 | M-004906- serine hydroxyr      | 6472.00 SHMT2           | 4.29         | 1.66         | 0.73  |
| 50011.00 L05 | M-009594- phospholipase        | 5332.00 PLCB4           | 4.25         | 1.62         | 0.71  |
| 50011.00 L06 | M-004617- serine hydroxyr      | 6470.00 SHMT1           | 1.02         | 1.61         | -0.71 |
| 50011.00 L07 | M-009413- phospholipase        | 5337.00 PLD1            | 1.76         | 0.87         | -0.38 |
| 50011.00 L08 | M-006036- sonic hedgehog       | 6469.00 <u>SHH</u>      | <u>13.23</u> | <u>10.60</u> | 4.66  |
| 50011.00 L09 | M-004284- procollagen-lys      | 5351.00 PLOD1           | 3.28         | 0.65         | 0.28  |
| 50011.00 L10 | M-020350- SH3-domain bir       | 23677.00 <u>SH3BP4</u>  | <u>9.23</u>  | <u>6.60</u>  | 2.90  |
| 50011.00 L11 | M-011099- phosphomannanc       | 5373.00 PMM2            | 1.09         | 1.54         | -0.68 |
| 50011.00 L12 | M-009053- N-sulfoglucosar      | 6448.00 <u>SGSH</u>     | <u>8.42</u>  | <u>5.79</u>  | 2.54  |
| 50011.00 L13 | M-008973- pancreatic lipas     | 5406.00 PNLIP           | 1.57         | 1.06         | -0.47 |
| 50011.00 L14 | M-014653- sphingosine-1- $\mu$ | 81537.00 SGPP1          | 1.79         | 0.84         | -0.37 |
| 50011.00 L15 | M-009145- pancreatic lipas     | 5407.00 PNLIPRP1        | 1.51         | 1.12         | -0.49 |
| 50011.00 L16 | M-031917- SET domain cor       | 387893.00 SETD8         | 4.89         | 2.26         | 0.99  |



|              |                             |                   |       |       |       |
|--------------|-----------------------------|-------------------|-------|-------|-------|
| 50011.00 L17 | M-017678- phenylethanol     | 5409.00 PNMT      | 2.54  | 0.09  | -0.04 |
| 50011.00 L18 | M-014643- SET domain cor    | 80854.00 SETD7    | 5.33  | 2.70  | 1.19  |
| 50011.00 L19 | M-011943- polymerase (R     | 5433.00 POLR2D    | 2.06  | 0.57  | -0.25 |
| 50011.00 L20 | M-006357- SUMO1/sentri      | 29843.00 SENP1    | 0.35  | 2.28  | -1.00 |
| 50011.00 L21 | M-016499- protein-O-man     | 10585.00 POMT1    | 1.10  | 1.53  | -0.67 |
| 50011.00 L23 | M-009229- paraoxonase 1     | 5444.00 PON1      | 1.49  | 1.14  | -0.50 |
| 50011.00 M02 | M-005924- legumain          | 5641.00 LGMN      | 5.81  | 3.18  | 1.40  |
| 50011.00 M04 | M-014291- tRNA splicing e   | 79042.00 TSEN34   | 10.63 | 8.00  | 3.51  |
| 50011.00 M05 | M-009910- hydroxysteroid    | 3290.00 HSD11B1   | 3.76  | 1.13  | 0.50  |
| 50011.00 M06 | M-011717- lactase           | 3938.00 LCT       | 3.12  | 0.49  | 0.21  |
| 50011.00 M07 | M-008983- hydroxysteroid    | 3291.00 HSD11B2   | 2.04  | 0.59  | -0.26 |
| 50011.00 M08 | M-008373- tubulointerstiti  | 64129.00 TINAGL1  | 1.61  | 1.02  | -0.45 |
| 50011.00 M09 | M-009723- hydroxysteroid    | 3292.00 HSD17B1   | 1.81  | 0.82  | -0.36 |
| 50011.00 M10 | M-009425- leucine carboxy   | 51451.00 LCMT1    | 0.70  | 1.93  | -0.85 |
| 50011.00 M11 | M-008474- hydroxysteroid    | 51144.00 HSD17B12 | 4.70  | 2.07  | 0.91  |
| 50011.00 M12 | M-011920- like-glycosyltra  | 9215.00 LARGE     | 1.62  | 1.01  | -0.45 |
| 50011.00 M13 | M-009478- hydroxysteroid    | 3294.00 HSD17B2   | 2.22  | 0.41  | -0.18 |
| 50011.00 M14 | M-009867- kynureninase (l   | 8942.00 KYNU      | 2.55  | 0.08  | -0.04 |
| 50011.00 M15 | M-008138- hydroxysteroid    | 3293.00 HSD17B3   | 5.70  | 3.07  | 1.35  |
| 50011.00 M16 | M-005921- kallikrein B, pla | 3818.00 KLKB1     | 2.05  | 0.58  | -0.25 |
| 50011.00 M17 | M-008140- hydroxysteroid    | 51478.00 HSD17B7  | 1.69  | 0.94  | -0.41 |
| 50011.00 M18 | M-005914- kallikrein-relate | 354.00 KLK3       | 2.55  | 0.08  | -0.04 |
| 50011.00 M19 | M-004898- ubiquitin-conju   | 29089.00 UBE2T    | 0.51  | 2.12  | -0.93 |
| 50011.00 M20 | M-005913- kallikrein-relate | 3817.00 KLK2      | 1.60  | 1.03  | -0.45 |
| 50011.00 M21 | M-010516- hyaluronogluco    | 3373.00 HYAL1     | 1.28  | 1.35  | -0.59 |
| 50011.00 M23 | M-009254- iduronate 2-sul   | 3423.00 IDS       | 0.54  | 2.09  | -0.92 |
| 50011.00 N02 | M-008308- serine dehydrat   | 113675.00 SDSL    | 0.84  | 1.79  | -0.79 |
| 50011.00 N04 | M-011385- succinate dehyd   | 6391.00 SDHC      | 7.44  | 4.81  | 2.11  |
| 50011.00 N05 | M-009676- paraoxonase 2     | 5445.00 PON2      | 4.63  | 2.00  | 0.88  |
| 50011.00 N06 | M-009309- sterol-C4-meth    | 6307.00 SC4MOL    | 14.71 | 12.08 | 5.31  |
| 50011.00 N07 | M-009675- paraoxonase 3     | 5446.00 PON3      | 1.68  | 0.95  | -0.42 |
| 50011.00 N08 | M-010382- spermidine/spe    | 6303.00 SAT1      | 9.28  | 6.65  | 2.92  |
| 50011.00 N09 | M-010114- P450 (cytochro    | 5447.00 POR       | 3.23  | 0.60  | 0.26  |
| 50011.00 N10 | M-010051- sarcosine dehyd   | 1757.00 SARDH     | 4.48  | 1.85  | 0.81  |
| 50011.00 N11 | M-012348- pyrophosphata     | 27068.00 PPA2     | 2.62  | 0.01  | -0.01 |
| 50011.00 N12 | M-020035- acyl-CoA synthe   | 6296.00 ACSM3     | 1.21  | 1.42  | -0.62 |
| 50011.00 N13 | M-019098- phosphatidic ac   | 8611.00 PPAP2A    | 1.10  | 1.53  | -0.67 |
| 50011.00 N14 | M-006353- testicular solub  | 55811.00 SAC      | 4.01  | 1.38  | 0.61  |
| 50011.00 N15 | M-008256- peptidylprolyl i  | 51645.00 PPIL1    | 0.77  | 1.86  | -0.82 |
| 50011.00 N16 | M-010575- ribonucleotide    | 50484.00 RRM2B    | 3.56  | 0.93  | 0.41  |
| 50011.00 N17 | M-008383- protoporphyrin    | 5498.00 PPOX      | 0.11  | 2.52  | -1.11 |
| 50011.00 N18 | M-010379- ribonucleotide    | 6241.00 RRM2      | 2.87  | 0.24  | 0.11  |
| 50011.00 N19 | M-007718- palmitoyl-prote   | 5538.00 PPT1      | 1.02  | 1.61  | -0.71 |
| 50011.00 N20 | M-004270- ribonucleotide    | 6240.00 RRM1      | 0.29  | 2.34  | -1.03 |
| 50011.00 N21 | M-006005- prolylcarboxyp    | 5547.00 PRCP      | 1.09  | 1.54  | -0.68 |
| 50011.00 N23 | M-020200- primase, polyp    | 5557.00 PRIM1     | 0.10  | 2.53  | -1.11 |
| 50011.00 O02 | M-005245- arylacetamide c   | 57552.00 AADA1    | 1.09  | 1.54  | -0.68 |

|                     |                                   |                |               |             |             |             |
|---------------------|-----------------------------------|----------------|---------------|-------------|-------------|-------------|
| 50011.00 O04        | M-024152- mannosidase, a          | 23324.00       | MAN2B2        | 0.20        | 2.43        | -1.07       |
| 50011.00 O05        | M-011056- iduronidase, al         | 3425.00        | IDUA          | 3.11        | 0.48        | 0.21        |
| 50011.00 O06        | M-008588- adenosylhomoc           | 23382.00       | KIAA0828      | 3.94        | 1.31        | 0.57        |
| 50011.00 O07        | M-005900- complement fa           | 3426.00        | CFI           | 3.89        | 1.26        | 0.55        |
| 50011.00 O08        | M-009223- amine oxidase (         | 23028.00       | AOF2          | 3.68        | 1.05        | 0.46        |
| 50011.00 O09        | M-019065- interferon, gam         | 10437.00       | IFI30         | 2.25        | 0.38        | -0.17       |
| 50011.00 O10        | M-004785- histidine acid pl       | 23262.00       | HISPPD1       | 2.29        | 0.34        | -0.15       |
| 50011.00 O11        | M-004330- IMP (inosine m          | 3615.00        | IMPDH2        | 1.30        | 1.33        | -0.59       |
| 50011.00 O12        | M-010181- isovaleryl Coen.        | 3712.00        | IVD           | 2.09        | 0.54        | -0.24       |
| <b>50011.00 O13</b> | <b>M-011539- inositol polyphc</b> | <b>8821.00</b> | <b>INPP4B</b> | <b>7.38</b> | <b>4.75</b> | <b>2.09</b> |
| 50011.00 O14        | M-013681- inosine triphos         | 3704.00        | ITPA          | 1.21        | 1.42        | -0.63       |
| 50011.00 O15        | M-020005- inositol polyphc        | 3632.00        | INPP5A        | 1.26        | 1.37        | -0.60       |
| 50011.00 O16        | M-015994- interferon stim         | 3669.00        | ISG20         | 2.95        | 0.32        | 0.14        |
| 50011.00 O17        | M-021811- inositol polyphc        | 3633.00        | INPP5B        | 0.32        | 2.31        | -1.02       |
| 50011.00 O18        | M-020852- inositol polyphc        | 56623.00       | INPP5E        | 2.07        | 0.56        | -0.24       |
| 50011.00 O19        | M-007285- N-acetylneuram          | 140838.00      | NANP          | 5.16        | 2.53        | 1.11        |
| 50011.00 O20        | M-003013- inositol polyphc        | 3635.00        | INPP5D        | 1.47        | 1.16        | -0.51       |
| 50011.00 O21        | M-005884- gamma-glutam            | 2678.00        | GGT1          | 2.53        | 0.10        | -0.05       |
| 50011.00 O23        | M-005885- gamma-glutam            | 2679.00        | GGT3          | 3.09        | 0.46        | 0.20        |
| 50011.00 P02        | M-020033- processing of p         | 10248.00       | POP7          | 2.94        | 0.31        | 0.14        |
| 50011.00 P04        | M-006026- renin                   | 5972.00        | REN           | 1.38        | 1.25        | -0.55       |
| 50011.00 P05        | M-009543- proline dehydr          | 5625.00        | PRODH         | 3.46        | 0.83        | 0.36        |
| 50011.00 P06        | M-009451- retinol dehydro         | 50700.00       | RDH8          | 3.46        | 0.83        | 0.36        |
| 50011.00 P07        | M-013098- proline dehydr          | 58510.00       | PRODH2        | 1.62        | 1.01        | -0.45       |
| 50011.00 P08        | M-008220- retinol dehydro         | 5959.00        | RDH5          | 1.12        | 1.51        | -0.67       |
| 50011.00 P09        | M-006011- protease, serin         | 10279.00       | PRSS16        | 1.15        | 1.48        | -0.65       |
| 50011.00 P10        | M-006025- RCE1 homolog,           | 9986.00        | RCE1          | 1.63        | 1.00        | -0.44       |
| 50011.00 P11        | M-006016- protease, serin         | 5651.00        | PRSS7         | 3.49        | 0.86        | 0.38        |
| 50011.00 P12        | M-007262- Rab geranylger          | 5876.00        | RABGGTB       | 2.63        | 0.00        | 0.00        |
| 50011.00 P13        | M-008207- growth-inhibit          | 219595.00      | PSMAL         | 4.50        | 1.87        | 0.82        |
| 50011.00 P14        | M-005097- Rab geranylger          | 5875.00        | RABGGTA       | 2.98        | 0.35        | 0.15        |
| 50011.00 P15        | M-006019- proteasome (pr          | 5699.00        | PSMB10        | 0.40        | 2.23        | -0.98       |
| 50011.00 P16        | M-008502- quinoid dihydr          | 5860.00        | QDPR          | 5.49        | 2.86        | 1.26        |
| 50011.00 P17        | M-011362- proteasome (pr          | 5692.00        | PSMB4         | 2.19        | 0.44        | -0.20       |
| 50011.00 P18        | M-014246- pyrroline-5-carl        | 65263.00       | PYCR1         | 1.32        | 1.31        | -0.58       |
| 50011.00 P19        | M-006020- proteasome (pr          | 5694.00        | PSMB6         | 7.23        | 4.60        | 2.02        |
| 50011.00 P20        | M-004691- prostaglandin l         | 5740.00        | PTGIS         | 2.23        | 0.40        | -0.17       |
| 50011.00 P21        | M-006023- proteasome (pr          | 5698.00        | PSMB9         | 0.23        | 2.40        | -1.06       |
| 50011.00 P23        | M-008568- phosphatidylse          | 9791.00        | PTDSS1        | 0.00        | 2.63        | -1.16       |
|                     |                                   |                | mdn           | 2.63        | 1.54        |             |
|                     |                                   |                | 3MAD          |             | 4.61        |             |
|                     | %hits                             | 5.00           | MADc          |             | 2.28        |             |

**Plate 11 Z scores**

|              |  |  |  |       |  |       |
|--------------|--|--|--|-------|--|-------|
| 50011.00 C22 |  |  |  |       |  | 21.60 |
| 50011.00 D22 |  |  |  | 13.52 |  | 17.66 |
| 50011.00 E22 |  |  |  | 12.68 |  | 19.93 |

|              |                                        |         |           |       |
|--------------|----------------------------------------|---------|-----------|-------|
| 50011.00 F22 |                                        |         | 15.51     | 23.25 |
|              |                                        |         | mn        | 13.90 |
|              |                                        |         | sd        | 1.45  |
| 50011.00 G22 |                                        |         | 0.93      | 5.58  |
| 50011.00 H22 |                                        |         |           | 0.91  |
| 50011.00 I22 |                                        |         | 0.00      | 1.61  |
| 50011.00 J22 |                                        |         | 1.35      | 2.00  |
|              |                                        |         | 0.76      | 2.53  |
|              |                                        |         | 0.69      | 2.08  |
| 50011.00 G03 | M-003290- polo-like kinase             | 5347.00 | PLK1 SMAR | 5.44  |
| 50011.00 H03 | M-003290- polo-like kinase             | 5347.00 | PLK1 SMAR | 1.99  |
| 50011.00 I03 | D-001206-∴siControl non-targeting siRN |         |           | 7.00  |
| 50011.00 J03 | D-001206-∴siControl non-targeting siRN |         |           | 5.75  |
| 50011.00 K03 | D-001600-(∴siGLO RISC-free siRNA       |         |           | 12.62 |
| 50011.00 L03 | D-001600-(∴siGLO RISC-free siRNA       |         |           | 15.76 |

| <u>% inf</u> | <u>abs dev</u> | <u>robust Z</u> | <u>% inf</u> | <u>abs dev</u> | <u>robust Z</u> |           |
|--------------|----------------|-----------------|--------------|----------------|-----------------|-----------|
| 1.83         | 0.80           | -0.39           | 4.48         | 0.89           | 0.35            |           |
| 0.48         | 2.15           | -1.04           | 0.68         | 2.91           | -1.13           |           |
| 1.68         | 0.95           | -0.46           | 1.77         | 1.82           | -0.71           |           |
| 4.80         | 2.17           | 1.06            | 5.15         | 1.56           | 0.61            |           |
| 8.93         | 6.30           | 3.06            | 8.07         | 4.48           | 1.74 x          | toxic b,c |
| 3.22         | 0.59           | 0.29            | 4.01         | 0.42           | 0.16            |           |
| 1.45         | 1.18           | -0.58           | 0.71         | 2.88           | -1.12           |           |
| 2.72         | 0.09           | 0.04            | 2.18         | 1.41           | -0.55           |           |
| 1.93         | 0.70           | -0.34           | 0.39         | 3.20           | -1.24           |           |
| 2.11         | 0.52           | -0.25           | 0.46         | 3.13           | -1.22           |           |
| 2.19         | 0.44           | -0.21           | 2.66         | 0.93           | -0.36           |           |
| 3.93         | 1.30           | 0.63            | 1.58         | 2.01           | -0.78           |           |
| 5.26         | 2.63           | 1.28            | 1.06         | 2.53           | -0.98           |           |
| 1.61         | 1.02           | -0.50           | 2.46         | 1.13           | -0.44           |           |
| 0.79         | 1.84           | -0.89           | 3.56         | 0.03           | -0.01           |           |
| 1.51         | 1.12           | -0.55           | 3.62         | 0.03           | 0.01            |           |
| 1.62         | 1.01           | -0.49           | 0.50         | 3.09           | -1.20           |           |
| 0.95         | 1.68           | -0.82           | 0.83         | 2.76           | -1.07           |           |
| 2.12         | 0.51           | -0.25           | 2.13         | 1.46           | -0.57           |           |
| 1.84         | 0.79           | -0.38           | 1.56         | 2.03           | -0.79           |           |
| 1.47         | 1.16           | -0.57           | 5.87         | 2.28           | 0.88            |           |
| 0.46         | 2.17           | -1.06           | 0.95         | 2.64           | -1.03           |           |
| 2.44         | 0.19           | -0.09           | 1.97         | 1.62           | -0.63           |           |
| 4.05         | 1.42           | 0.69            | 3.52         | 0.07           | -0.03           |           |
| 3.55         | 0.92           | 0.45            | 1.66         | 1.93           | -0.75           |           |
| 3.73         | 1.10           | 0.53            | 4.14         | 0.55           | 0.21            |           |
| 2.17         | 0.46           | -0.22           | 2.80         | 0.79           | -0.31           |           |
| 0.39         | 2.24           | -1.09           | 0.06         | 3.53           | -1.37           |           |
| 4.61         | 1.98           | 0.96            | 2.89         | 0.70           | -0.27           |           |
| 2.47         | 0.16           | -0.08           | 1.49         | 2.10           | -0.82           |           |
| 2.18         | 0.45           | -0.22           | 2.36         | 1.23           | -0.48           |           |
| 3.20         | 0.57           | 0.28            | 2.06         | 1.53           | -0.59           |           |
| 2.67         | 0.04           | 0.02            | 3.28         | 0.31           | -0.12           |           |
| 3.29         | 0.66           | 0.32            | 1.32         | 2.27           | -0.88           |           |
| 2.77         | 0.14           | 0.07            | 1.57         | 2.02           | -0.78           |           |
| 5.89         | 3.26           | 1.58            | 6.63         | 3.04           | 1.18            |           |
| 1.75         | 0.88           | -0.43           | 1.27         | 2.32           | -0.90           |           |
| 1.81         | 0.82           | -0.40           | 2.67         | 0.92           | -0.36           |           |
| 0.70         | 1.93           | -0.94           | 1.39         | 2.20           | -0.85           |           |
| 6.39         | 3.76           | 1.83            | 3.09         | 0.50           | -0.19           |           |
| 1.00         | 1.63           | -0.79           | 1.52         | 2.07           | -0.80           |           |
| 4.07         | 1.44           | 0.70            | 1.11         | 2.48           | -0.96           |           |
| 2.00         | 0.63           | -0.31           | 5.95         | 2.36           | 0.92            |           |
| 0.85         | 1.78           | -0.86           | 1.89         | 1.70           | -0.66           |           |
| 0.45         | 2.18           | -1.06           | 0.86         | 2.73           | -1.06           |           |
| 0.63         | 2.00           | -0.97           | 0.96         | 2.63           | -1.02           |           |

|              |              |       |              |              |        |
|--------------|--------------|-------|--------------|--------------|--------|
| 1.32         | 1.31         | -0.63 | 3.51         | 0.08         | -0.03  |
| 1.54         | 1.09         | -0.53 | 3.10         | 0.49         | -0.19  |
| 0.94         | 1.69         | -0.82 | 2.40         | 1.19         | -0.46  |
| 4.41         | 1.78         | 0.87  | 3.53         | 0.06         | -0.02  |
| 1.42         | 1.21         | -0.59 | 3.57         | 0.02         | -0.01  |
| 3.90         | 1.27         | 0.62  | 4.14         | 0.55         | 0.21   |
| 2.73         | 0.10         | 0.05  | 3.66         | 0.07         | 0.03   |
| 1.36         | 1.27         | -0.62 | 1.65         | 1.94         | -0.75  |
| 2.37         | 0.26         | -0.13 | 3.41         | 0.18         | -0.07  |
| 9.23         | 6.60         | 3.21  | 5.00         | 1.41         | 0.55   |
| <b>14.16</b> | <b>11.53</b> | 5.60  | <b>13.38</b> | <b>9.79</b>  | 3.80 y |
| 5.87         | 3.24         | 1.57  | 2.85         | 0.74         | -0.29  |
| 3.55         | 0.92         | 0.45  | 3.97         | 0.38         | 0.15   |
| 3.53         | 0.90         | 0.44  | 3.54         | 0.05         | -0.02  |
| 0.81         | 1.82         | -0.89 | 2.96         | 0.63         | -0.24  |
| 6.41         | 3.78         | 1.84  | 7.18         | 3.59         | 1.39   |
| 2.95         | 0.32         | 0.16  | 8.75         | 5.16         | 2.00   |
| 0.97         | 1.66         | -0.81 | 3.16         | 0.43         | -0.16  |
| 1.88         | 0.75         | -0.36 | 3.44         | 0.15         | -0.06  |
| <b>9.38</b>  | <b>6.75</b>  | 3.28  | <b>23.25</b> | <b>19.66</b> | 7.63 y |
| 2.41         | 0.22         | -0.11 | 0.99         | 2.60         | -1.01  |
| 2.63         | 0.00         | 0.00  | 14.61        | 11.02        | 4.28   |
| 2.90         | 0.27         | 0.13  | 0.70         | 2.89         | -1.12  |
| 0.63         | 2.00         | -0.97 | 5.91         | 2.32         | 0.90   |
| 0.73         | 1.90         | -0.93 | 5.31         | 1.72         | 0.67   |
| 6.07         | 3.44         | 1.67  | 12.78        | 9.19         | 3.57   |
| 3.81         | 1.18         | 0.57  | 2.94         | 0.65         | -0.25  |
| 0.76         | 1.87         | -0.91 | 5.97         | 2.38         | 0.92   |
| 0.62         | 2.01         | -0.98 | 5.51         | 1.92         | 0.75   |
| 0.28         | 2.35         | -1.14 | 2.69         | 0.90         | -0.35  |
| 2.11         | 0.52         | -0.25 | 6.25         | 2.66         | 1.03   |
| 0.12         | 2.51         | -1.22 | 1.40         | 2.19         | -0.85  |
| 1.44         | 1.19         | -0.58 | 3.04         | 0.55         | -0.21  |
| 1.16         | 1.47         | -0.72 | 4.31         | 0.72         | 0.28   |
| 0.93         | 1.70         | -0.83 | 6.64         | 3.05         | 1.18   |
| 4.87         | 2.24         | 1.09  | 5.07         | 1.48         | 0.58   |
| 5.22         | 2.59         | 1.26  | 8.84         | 5.25         | 2.04 x |
| 6.70         | 4.07         | 1.98  | 4.20         | 0.61         | 0.24   |
| 0.74         | 1.89         | -0.92 | 1.22         | 2.37         | -0.92  |
| 0.68         | 1.95         | -0.95 | 1.44         | 2.15         | -0.83  |
| 1.51         | 1.12         | -0.55 | 2.50         | 1.09         | -0.42  |
| 2.43         | 0.20         | -0.10 | 6.95         | 3.36         | 1.30   |
| 6.16         | 3.53         | 1.71  | 4.34         | 0.75         | 0.29   |
| 6.74         | 4.11         | 2.00  | 2.95         | 0.64         | -0.25  |
| 6.34         | 3.71         | 1.80  | 5.52         | 1.93         | 0.75   |
| 0.73         | 1.90         | -0.92 | 2.48         | 1.11         | -0.43  |
| 2.32         | 0.31         | -0.15 | 2.18         | 1.41         | -0.55  |

art a,b,c

|             |             |             |              |              |               |
|-------------|-------------|-------------|--------------|--------------|---------------|
| 3.41        | 0.78        | 0.38        | 0.88         | 2.71         | -1.05         |
| 1.46        | 1.17        | -0.57       | 2.52         | 1.07         | -0.42         |
| 4.17        | 1.54        | 0.75        | 2.34         | 1.25         | -0.49         |
| 1.28        | 1.35        | -0.65       | 0.99         | 2.60         | -1.01         |
| 5.74        | 3.11        | 1.51        | 2.78         | 0.81         | -0.31         |
| 4.42        | 1.79        | 0.87        | 6.69         | 3.10         | 1.20          |
| 5.52        | 2.89        | 1.40        | 1.26         | 2.33         | -0.90         |
| 0.21        | 2.42        | -1.18       | 1.67         | 1.92         | -0.74         |
| 0.55        | 2.08        | -1.01       | 2.92         | 0.67         | -0.26         |
| 2.17        | 0.46        | -0.22       | 6.15         | 2.56         | 0.99          |
| 1.23        | 1.40        | -0.68       | 2.73         | 0.86         | -0.33         |
| 0.65        | 1.98        | -0.96       | 1.73         | 1.86         | -0.72         |
| <b>7.26</b> | <b>4.63</b> | <b>2.25</b> | <b>17.62</b> | <b>14.03</b> | <b>5.44</b> y |
| 3.81        | 1.18        | 0.58        | 2.41         | 1.18         | -0.46         |
| 1.76        | 0.87        | -0.42       | 5.54         | 1.95         | 0.76          |
| 2.20        | 0.43        | -0.21       | 3.52         | 0.07         | -0.03         |
| 0.75        | 1.88        | -0.92       | 0.65         | 2.94         | -1.14         |
| 2.63        | 0.00        | 0.00        | 7.92         | 4.33         | 1.68          |
| 2.32        | 0.31        | -0.15       | 3.74         | 0.15         | 0.06          |
| 3.73        | 1.10        | 0.54        | 9.49         | <b>5.90</b>  | <b>2.29</b>   |
| 1.71        | 0.92        | -0.45       | 8.18         | 4.59         | 1.78          |
| 0.65        | 1.98        | -0.96       | 4.64         | 1.05         | 0.41          |
| 1.36        | 1.27        | -0.62       | 3.60         | 0.01         | 0.00          |
| 5.46        | 2.83        | 1.38        | 5.46         | 1.87         | 0.72          |
| 5.34        | 2.71        | 1.32        | 11.51        | <b>7.92</b>  | <b>3.07</b>   |
| 3.21        | 0.58        | 0.28        | 8.49         | 4.90         | 1.90          |
| 1.71        | 0.92        | -0.45       | 2.72         | 0.87         | -0.34         |
| 3.46        | 0.83        | 0.40        | 4.59         | 1.00         | 0.39          |
| <b>9.06</b> | <b>6.43</b> | <b>3.13</b> | <b>9.44</b>  | <b>5.85</b>  | <b>2.27</b> y |
| 3.38        | 0.75        | 0.37        | 3.39         | 0.20         | -0.08         |
| 1.57        | 1.06        | -0.51       | 2.70         | 0.89         | -0.35         |
| <b>9.85</b> | <b>7.22</b> | <b>3.51</b> | <b>18.25</b> | <b>14.66</b> | <b>5.69</b> y |
| 0.84        | 1.79        | -0.87       | 1.87         | 1.72         | -0.67         |
| 3.42        | 0.79        | 0.38        | 1.69         | 1.90         | -0.74         |
| 10.21       | <b>7.58</b> | <b>3.68</b> | 7.25         | 3.66         | 1.42          |
| 2.94        | 0.31        | 0.15        | 4.37         | 0.78         | 0.30          |
| 7.72        | <b>5.09</b> | <b>2.47</b> | 8.27         | 4.68         | 1.82          |
| 9.19        | <b>6.56</b> | <b>3.19</b> | 7.05         | 3.46         | 1.34          |
| 3.78        | 1.15        | 0.56        | 2.92         | 0.67         | -0.26         |
| <b>9.27</b> | <b>6.64</b> | <b>3.23</b> | <b>12.75</b> | <b>9.16</b>  | <b>3.56</b> y |
| 4.58        | 1.95        | 0.95        | 6.91         | 3.32         | 1.29          |
| 4.82        | 2.19        | 1.06        | 3.69         | 0.10         | 0.04          |
| 1.10        | 1.53        | -0.75       | 2.74         | 0.85         | -0.33         |
| <b>7.36</b> | <b>4.73</b> | <b>2.30</b> | <b>6.48</b>  | <b>2.89</b>  | <b>1.12</b> y |
| 11.17       | <b>8.54</b> | <b>4.15</b> | 7.17         | 3.58         | 1.39          |
| 8.59        | <b>5.96</b> | <b>2.90</b> | 3.05         | 0.54         | -0.21 x       |
| 3.88        | 1.25        | 0.61        | 3.11         | 0.48         | -0.19         |

art. b,c

|              |              |       |              |              |        |
|--------------|--------------|-------|--------------|--------------|--------|
| 4.09         | 1.46         | 0.71  | 7.98         | 4.39         | 1.70   |
| 0.75         | 1.88         | -0.92 | 1.54         | 2.05         | -0.80  |
| <b>7.74</b>  | <b>5.11</b>  | 2.49  | <b>19.84</b> | <b>16.25</b> | 6.31 y |
| 2.92         | 0.29         | 0.14  | 4.02         | 0.43         | 0.17   |
| 6.74         | 4.11         | 2.00  | 5.86         | 2.27         | 0.88   |
| <b>14.08</b> | <b>11.45</b> | 5.56  | <b>19.42</b> | <b>15.83</b> | 6.14 y |
| 3.69         | 1.06         | 0.52  | 4.72         | 1.13         | 0.44   |
| <b>7.54</b>  | <b>4.91</b>  | 2.39  | <b>6.00</b>  | 2.41         | 0.93 y |
| 1.78         | 0.85         | -0.41 | 2.96         | 0.63         | -0.25  |
| 4.37         | 1.74         | 0.84  | 8.77         | 5.18         | 2.01   |
| <b>8.51</b>  | <b>5.88</b>  | 2.86  | <b>12.47</b> | <b>8.88</b>  | 3.45 y |
| 2.66         | 0.03         | 0.01  | 3.59         | 0.00         | 0.00   |
| 1.93         | 0.70         | -0.34 | 1.86         | 1.73         | -0.67  |
| 2.91         | 0.28         | 0.14  | 2.07         | 1.52         | -0.59  |
| 4.67         | 2.04         | 0.99  | 8.11         | 4.52         | 1.76   |
| 5.54         | 2.91         | 1.42  | 11.56        | <b>7.97</b>  | 3.09   |
| <b>5.67</b>  | <b>3.04</b>  | 1.48  | <b>9.80</b>  | <b>6.21</b>  | 2.41 y |
| 6.60         | 3.97         | 1.93  | 11.02        | <b>7.43</b>  | 2.88   |
| 5.12         | 2.49         | 1.21  | 10.16        | <b>6.57</b>  | 2.55   |
| 1.82         | 0.81         | -0.39 | 3.55         | 0.04         | -0.02  |
| 1.01         | 1.62         | -0.79 | 2.75         | 0.84         | -0.33  |
| 3.34         | 0.71         | 0.34  | 3.41         | 0.18         | -0.07  |
| <b>7.94</b>  | <b>5.31</b>  | 2.58  | <b>10.63</b> | <b>7.04</b>  | 2.73 y |
| 5.47         | 2.84         | 1.38  | 6.45         | 2.86         | 1.11   |
| 0.75         | 1.88         | -0.91 | 2.49         | 1.10         | -0.43  |
| 2.03         | 0.60         | -0.29 | 1.87         | 1.72         | -0.67  |
| 4.92         | 2.29         | 1.11  | 0.97         | 2.62         | -1.01  |
| 1.95         | 0.68         | -0.33 | 3.74         | 0.15         | 0.06   |
| 4.37         | 1.74         | 0.85  | 2.38         | 1.21         | -0.47  |
| 0.35         | 2.28         | -1.11 | 2.71         | 0.88         | -0.34  |
| 2.39         | 0.24         | -0.12 | 2.78         | 0.81         | -0.32  |
| 3.93         | 1.30         | 0.63  | 3.75         | 0.16         | 0.06   |
| 3.09         | 0.46         | 0.22  | 4.49         | 0.90         | 0.35   |
| 4.09         | 1.46         | 0.71  | 6.69         | 3.10         | 1.20   |
| 5.95         | 3.32         | 1.61  | 9.21         | <b>5.62</b>  | 2.18 x |
| 2.63         | 0.00         | 0.00  | 2.48         | 1.11         | -0.43  |
| 1.21         | 1.42         | -0.69 | 0.24         | 3.35         | -1.30  |
| 2.61         | 0.02         | -0.01 | 2.96         | 0.63         | -0.24  |
| 1.61         | 1.02         | -0.50 | 1.76         | 1.83         | -0.71  |
| 0.70         | 1.93         | -0.94 | 3.17         | 0.42         | -0.16  |
| 3.87         | 1.24         | 0.60  | 0.63         | 2.96         | -1.15  |
| 2.44         | 0.19         | -0.09 | 0.59         | 3.00         | -1.17  |
| 5.19         | 2.56         | 1.25  | 5.18         | 1.59         | 0.62   |
| 0.88         | 1.75         | -0.85 | 1.88         | 1.71         | -0.67  |
| 5.93         | 3.30         | 1.60  | 4.64         | 1.05         | 0.41   |
| 3.35         | 0.72         | 0.35  | 4.47         | 0.88         | 0.34   |
| 2.41         | 0.22         | -0.11 | 2.80         | 0.79         | -0.31  |

toxic b,c

|              |              |       |              |              |        |
|--------------|--------------|-------|--------------|--------------|--------|
| 1.25         | 1.38         | -0.67 | 0.47         | 3.12         | -1.21  |
| 6.76         | 4.13         | 2.01  | 5.67         | 2.08         | 0.81   |
| 3.25         | 0.62         | 0.30  | 0.49         | 3.10         | -1.20  |
| 9.03         | 6.40         | 3.11  | 1.87         | 1.72         | -0.67  |
| <u>14.89</u> | <u>12.26</u> | 5.96  | <u>18.89</u> | <u>15.30</u> | 5.94 y |
| 9.36         | 6.73         | 3.27  | 4.74         | 1.15         | 0.45   |
| <u>20.18</u> | <u>17.55</u> | 8.53  | <u>17.30</u> | <u>13.71</u> | 5.32 y |
| 6.90         | 4.27         | 2.08  | 5.82         | 2.23         | 0.87   |
| 4.91         | 2.28         | 1.11  | 2.32         | 1.27         | -0.49  |
| 3.78         | 1.15         | 0.56  | 1.68         | 1.91         | -0.74  |
| <u>19.02</u> | <u>16.39</u> | 7.97  | <u>15.43</u> | <u>11.84</u> | 4.60 y |
| 4.14         | 1.51         | 0.74  | 6.90         | 3.31         | 1.28   |
| 2.17         | 0.46         | -0.22 | 1.06         | 2.53         | -0.98  |
| 4.60         | 1.97         | 0.96  | 5.92         | 2.33         | 0.90   |
| 2.64         | 0.01         | 0.01  | 5.34         | 1.75         | 0.68   |
| 1.14         | 1.49         | -0.73 | 3.94         | 0.35         | 0.14   |
| 1.69         | 0.94         | -0.46 | 4.60         | 1.01         | 0.39   |
| 3.38         | 0.75         | 0.36  | 5.08         | 1.49         | 0.58   |
| 4.25         | 1.62         | 0.79  | 4.96         | 1.37         | 0.53   |
| <u>3.57</u>  | <u>0.94</u>  | 0.46  | <u>10.81</u> | <u>7.22</u>  | 2.80 y |
| 0.67         | 1.96         | -0.95 | 1.67         | 1.92         | -0.74  |
| 2.27         | 0.36         | -0.18 | 5.42         | 1.83         | 0.71   |
| 2.96         | 0.33         | 0.16  | 2.42         | 1.17         | -0.45  |
| 1.18         | 1.45         | -0.71 | 1.51         | 2.08         | -0.81  |
| 3.54         | 0.91         | 0.44  | 8.79         | 5.20         | 2.02   |
| 3.49         | 0.86         | 0.42  | 9.67         | 6.08         | 2.36   |
| 5.36         | 2.73         | 1.32  | 4.99         | 1.40         | 0.54   |
| 2.22         | 0.41         | -0.20 | 3.76         | 0.17         | 0.07   |
| 5.49         | 2.86         | 1.39  | 4.75         | 1.16         | 0.45   |
| 0.92         | 1.71         | -0.83 | 1.92         | 1.67         | -0.65  |
| 3.81         | 1.18         | 0.57  | 4.04         | 0.45         | 0.17   |
| 0.56         | 2.07         | -1.01 | 2.82         | 0.77         | -0.30  |
| 1.96         | 0.67         | -0.33 | 3.95         | 0.36         | 0.14   |
| 1.77         | 0.86         | -0.42 | 1.34         | 2.25         | -0.87  |
| 2.56         | 0.07         | -0.03 | 4.47         | 0.88         | 0.34   |
| 3.10         | 0.47         | 0.23  | 11.08        | 7.49         | 2.91   |
| 1.33         | 1.30         | -0.63 | 3.59         | 0.00         | 0.00   |
| 2.77         | 0.14         | 0.07  | 6.37         | 2.78         | 1.08   |
| <u>5.70</u>  | <u>3.07</u>  | 1.49  | <u>11.77</u> | <u>8.18</u>  | 3.18 y |
| 2.27         | 0.36         | -0.18 | 3.83         | 0.24         | 0.09   |
| <u>12.22</u> | <u>9.59</u>  | 4.66  | <u>21.42</u> | <u>17.83</u> | 6.92 y |
| 0.85         | 1.78         | -0.87 | 2.35         | 1.24         | -0.48  |
| <u>13.48</u> | <u>10.85</u> | 5.27  | <u>13.28</u> | <u>9.69</u>  | 3.76 y |
| 2.15         | 0.48         | -0.23 | 3.16         | 0.43         | -0.17  |
| 3.77         | 1.14         | 0.55  | 6.52         | 2.93         | 1.14   |
| 1.26         | 1.37         | -0.67 | 4.94         | 1.35         | 0.52   |
| 2.39         | 0.24         | -0.12 | 4.88         | 1.29         | 0.50   |



|              |             |       |              |              |        |
|--------------|-------------|-------|--------------|--------------|--------|
| 2.74         | 0.11        | 0.05  | 6.02         | 2.43         | 0.94   |
| <b>7.71</b>  | <b>5.08</b> | 2.47  | <b>9.09</b>  | <b>5.50</b>  | 2.13 y |
| 0.91         | 1.72        | -0.84 | 0.92         | 2.67         | -1.03  |
| 2.63         | 0.00        | 0.00  | 4.16         | 0.57         | 0.22   |
| 3.08         | 0.45        | 0.22  | 4.37         | 0.78         | 0.30   |
| 4.28         | 1.65        | 0.80  | 6.33         | 2.74         | 1.06   |
| 5.00         | 2.37        | 1.15  | 4.64         | 1.05         | 0.41   |
| <b>7.11</b>  | <b>4.48</b> | 2.18  | <b>12.50</b> | <b>8.91</b>  | 3.46 y |
| 3.92         | 1.29        | 0.63  | 7.93         | 4.34         | 1.69   |
| 7.12         | <b>4.49</b> | 2.18  | 4.52         | 0.93         | 0.36   |
| 5.17         | 2.54        | 1.24  | 2.93         | 0.66         | -0.26  |
| 1.61         | 1.02        | -0.49 | 1.94         | 1.65         | -0.64  |
| 0.87         | 1.76        | -0.86 | 2.97         | 0.62         | -0.24  |
| 0.55         | 2.08        | -1.01 | 1.27         | 2.32         | -0.90  |
| 5.09         | 2.46        | 1.20  | 7.53         | 3.94         | 1.53   |
| 2.77         | 0.14        | 0.07  | 3.62         | 0.03         | 0.01   |
| 0.96         | 1.67        | -0.81 | 2.54         | 1.05         | -0.41  |
| 0.69         | 1.94        | -0.94 | 4.10         | 0.51         | 0.20   |
| 4.50         | 1.87        | 0.91  | 5.17         | 1.58         | 0.61   |
| 1.00         | 1.63        | -0.79 | 1.70         | 1.89         | -0.73  |
| 1.95         | 0.68        | -0.33 | 1.88         | 1.71         | -0.66  |
| 3.36         | 0.73        | 0.36  | 3.31         | 0.28         | -0.11  |
| 0.27         | 2.36        | -1.15 | 1.48         | 2.11         | -0.82  |
| 2.67         | 0.04        | 0.02  | 2.28         | 1.31         | -0.51  |
| 0.00         | 2.63        | -1.28 | 0.00         | 3.59         | -1.39  |
| 1.60         | 1.03        | -0.50 | 0.99         | 2.60         | -1.01  |
| 1.79         | 0.84        | -0.41 | 1.43         | 2.16         | -0.84  |
| 4.57         | 1.94        | 0.94  | 7.93         | 4.34         | 1.69   |
| 3.79         | 1.16        | 0.57  | 11.99        | <b>8.40</b>  | 3.26   |
| <b>12.47</b> | <b>9.84</b> | 4.78  | <b>18.35</b> | <b>14.76</b> | 5.73 y |
| 2.12         | 0.51        | -0.25 | 2.73         | 0.86         | -0.33  |
| <b>6.02</b>  | <b>3.39</b> | 1.65  | <b>11.26</b> | <b>7.67</b>  | 2.98 y |
| 4.54         | 1.91        | 0.93  | 7.71         | 4.12         | 1.60   |
| 5.65         | 3.02        | 1.47  | 6.89         | 3.30         | 1.28   |
| 3.40         | 0.77        | 0.38  | 6.53         | 2.94         | 1.14   |
| 0.63         | 2.00        | -0.97 | 1.08         | 2.51         | -0.97  |
| 0.16         | 2.47        | -1.20 | 3.96         | 0.37         | 0.14   |
| 3.48         | 0.85        | 0.41  | 12.75        | <b>9.16</b>  | 3.56   |
| 0.31         | 2.32        | -1.13 | 0.59         | 3.00         | -1.16  |
| <b>8.63</b>  | <b>6.00</b> | 2.91  | <b>17.19</b> | <b>13.60</b> | 5.28 y |
| 1.80         | 0.83        | -0.41 | 3.87         | 0.28         | 0.11   |
| 0.68         | 1.95        | -0.95 | 0.95         | 2.64         | -1.03  |
| 3.51         | 0.88        | 0.43  | 7.16         | 3.57         | 1.39   |
| 2.95         | 0.32        | 0.15  | 1.57         | 2.02         | -0.78  |
| 1.17         | 1.46        | -0.71 | 4.06         | 0.47         | 0.18   |
| 0.28         | 2.35        | -1.14 | 0.37         | 3.22         | -1.25  |
| 7.10         | <b>4.47</b> | 2.17  | 1.67         | 1.92         | -0.74  |

|             |             |             |              |              |               |
|-------------|-------------|-------------|--------------|--------------|---------------|
| 1.34        | 1.29        | -0.63       | 4.17         | 0.58         | 0.23          |
| 1.88        | 0.75        | -0.37       | 1.63         | 1.96         | -0.76         |
| 2.91        | 0.28        | 0.14        | 2.43         | 1.16         | -0.45         |
| 3.36        | 0.73        | 0.35        | 3.43         | 0.16         | -0.06         |
| 3.20        | 0.57        | 0.28        | 7.82         | 4.23         | 1.64          |
| 2.57        | 0.06        | -0.03       | 2.00         | 1.59         | -0.62         |
| 1.58        | 1.05        | -0.51       | 4.23         | 0.64         | 0.25          |
| 3.49        | 0.86        | 0.42        | 2.77         | 0.82         | -0.32         |
| 1.50        | 1.13        | -0.55       | 1.92         | 1.67         | -0.65         |
| <b>7.17</b> | <b>4.54</b> | <b>2.21</b> | <b>14.52</b> | <b>10.93</b> | <b>4.24</b> y |
| 2.44        | 0.19        | -0.09       | 8.29         | 4.70         | 1.83          |
| 0.69        | 1.94        | -0.94       | 0.34         | 3.25         | -1.26         |
| 2.19        | 0.44        | -0.21       | 3.61         | 0.02         | 0.01          |
| 0.24        | 2.39        | -1.16       | 2.50         | 1.09         | -0.42         |
| 0.66        | 1.97        | -0.96       | 4.18         | 0.59         | 0.23          |
| 1.43        | 1.20        | -0.58       | 6.15         | 2.56         | 1.00          |
| 3.49        | 0.86        | 0.42        | 9.76         | <b>6.17</b>  | <b>2.39</b>   |
| 2.03        | 0.60        | -0.29       | 1.68         | 1.91         | -0.74         |
| 0.62        | 2.01        | -0.98       | 2.21         | 1.38         | -0.54         |
| 1.43        | 1.20        | -0.58       | 5.43         | 1.84         | 0.71          |
| 1.66        | 0.97        | -0.47       | 2.47         | 1.12         | -0.44         |
| 1.42        | 1.21        | -0.59       | 4.17         | 0.58         | 0.23          |
| 0.44        | 2.19        | -1.07       | 2.18         | 1.41         | -0.55         |
| 1.03        | 1.60        | -0.78       | 3.24         | 0.35         | -0.14         |
| 1.84        | 0.79        | -0.39       | 3.41         | 0.18         | -0.07         |
| 1.89        | 0.74        | -0.36       | 2.09         | 1.50         | -0.58         |
| 1.40        | 1.23        | -0.60       | 2.39         | 1.20         | -0.46         |
| 1.48        | 1.15        | -0.56       | 3.44         | 0.15         | -0.06         |
| 4.52        | 1.89        | 0.92        | 5.21         | 1.62         | 0.63          |
| 7.42        | <b>4.79</b> | <b>2.33</b> | 4.54         | 0.95         | 0.37          |
| 2.74        | 0.11        | 0.05        | 4.04         | 0.45         | 0.18          |
| 3.06        | 0.43        | 0.21        | 3.87         | 0.28         | 0.11          |
| 2.53        | 0.10        | -0.05       | 8.09         | 4.50         | 1.75          |
| 1.73        | 0.90        | -0.44       | 5.04         | 1.45         | 0.56          |
| 1.58        | 1.05        | -0.51       | 2.08         | 1.51         | -0.59         |
| 0.69        | 1.94        | -0.95       | 3.13         | 0.47         | -0.18         |
| 3.75        | 1.12        | 0.54        | 4.23         | 0.64         | 0.25          |
| 2.39        | 0.24        | -0.12       | 8.18         | 4.59         | 1.78          |
| 0.79        | 1.84        | -0.90       | 6.54         | 2.95         | 1.15          |
| 2.63        | 1.39        |             | 3.59         | 1.74         |               |
|             | 4.17        |             |              | 5.22         |               |
|             | 2.06        |             |              | 2.58         |               |

|       | A     | B    | C          |
|-------|-------|------|------------|
| 29.69 |       |      |            |
| 26.28 | 3psSD | 4.36 | 7.17 14.28 |
| 20.77 | 3ngSD | 2.07 | 6.25 2.49  |

|       |           |       |       |       |
|-------|-----------|-------|-------|-------|
| 19.54 | SumSD     | 6.44  | 13.42 | 16.77 |
| 24.07 | DiffMn    | 13.14 | 18.08 | 22.94 |
| 4.76  | SmovrDiff | 0.49  | 0.74  | 0.73  |
|       | 1minus    | 0.51  | 0.26  | 0.27  |

1.10  
2.28  
0.84  
0.32  
1.13  
0.83

3.10  
3.38

4.97  
5.55

12.67  
27.67

|              |                             |                  | <u>% inf</u> | <u>abs dev</u> | <u>robust Z</u> |
|--------------|-----------------------------|------------------|--------------|----------------|-----------------|
| 50012.00 A02 | M-012267- tumor necrosis f  | 7127.00 TNFAIP2  | 1.00         | 3.84           | -0.98           |
| 50012.00 A04 | M-017794- thymosin, beta    | 9168.00 TMSB10   | 0.84         | 4.00           | -1.02           |
| 50012.00 A05 | M-004910- ubiquitin-conjug  | 7329.00 UBE2I    | 2.30         | 2.54           | -0.65           |
| 50012.00 A06 | M-020635- transmembrane     | 10329.00 TMEM5   | 0.82         | 4.02           | -1.03           |
| 50012.00 A07 | M-007266- ubiquitin-conjug  | 51465.00 UBE2J1  | 3.17         | 1.67           | -0.43           |
| 50012.00 A08 | M-017046- transmembrane     | 10330.00 TMEM4   | 0.72         | 4.12           | -1.05           |
| 50012.00 A09 | M-008614- ubiquitin-conjug  | 118424.00 UBE2J2 | 2.28         | 2.56           | -0.65           |
| 50012.00 A10 | M-017206- transmembrane     | 117531.00 TMC1   | 0.07         | 4.77           | -1.22           |
| 50012.00 A11 | M-008631- ubiquitin-conjug  | 55585.00 UBE2Q1  | 0.27         | 4.57           | -1.17           |
| 50012.00 A12 | M-011973- transmembrane     | 7104.00 TM4SF4   | 2.15         | 2.69           | -0.69           |
| 50012.00 A13 | M-009700- ubiquitin-conjug  | 54926.00 UBE2R2  | 1.40         | 3.44           | -0.88           |
| 50012.00 A14 | M-021321- tetraspanin 7     | 7102.00 TSPAN7   | 3.01         | 1.83           | -0.47           |
| 50012.00 A15 | M-008823- ubiquitin-conjug  | 7336.00 UBE2V2   | 2.02         | 2.82           | -0.72           |
| 50012.00 A16 | M-010610- transmembrane     | 4071.00 TM4SF1   | 0.87         | 3.97           | -1.01           |
| 50012.00 A17 | M-020658- ubiquitin-like 4A | 8266.00 UBL4A    | 1.91         | 2.93           | -0.75           |
| 50012.00 A18 | M-019336- transducin-like e | 7091.00 TLE4     | 1.12         | 3.72           | -0.95           |
| 50012.00 A19 | M-008494- UEV and lactate   | 55293.00 UEVLD   | 2.60         | 2.24           | -0.57           |
| 50012.00 A20 | M-019929- transducin-like e | 7090.00 TLE3     | 2.35         | 2.49           | -0.64           |
| 50012.00 A21 | M-017918- ubiquitin fusion  | 7353.00 UFD1L    | 0.54         | 4.30           | -1.10           |
| 50012.00 A23 | M-006441- UDP-glucose ce    | 7357.00 UGCG     | 0.85         | 3.99           | -1.02           |
| 50012.00 B02 | M-009683- FK506 binding p   | 55033.00 FKBP14  | 7.03         | 2.19           | 0.56            |
| 50012.00 B04 | M-010344- flap structure-sp | 2237.00 FEN1     | 3.38         | 1.46           | -0.37           |
| 50012.00 B05 | M-019750- troponin C type   | 7125.00 TNNC2    | 3.41         | 1.43           | -0.36           |
| 50012.00 B06 | M-011036- ferrochelatase (  | 2235.00 FECH     | 1.23         | 3.61           | -0.92           |
| 50012.00 B07 | M-019751- troponin I type   | 7136.00 TNNI2    | 1.53         | 3.31           | -0.84           |
| 50012.00 B08 | M-009442- farnesyl-diphos   | 2222.00 FDFT1    | 9.41         | 4.57           | 1.16            |
| 50012.00 B09 | M-020917- troponin I type   | 7137.00 TNNI3    | 14.10        | 9.26           | 2.36            |
| 50012.00 B10 | M-003490- F-box and WD re   | 23291.00 FBXW11  | 3.30         | 1.54           | -0.39           |
| 50012.00 B11 | M-023617- troponin T type   | 7138.00 TNNT1    | 5.63         | 0.79           | 0.20            |
| 50012.00 B12 | M-012430- F-box protein 24  | 26261.00 FBXO24  | 2.32         | 2.52           | -0.64           |
| 50012.00 B13 | M-019371- troponin T type   | 7139.00 TNNT2    | 10.82        | 5.98           | 1.52            |
| 50012.00 B14 | M-031881- tetraspanin 17    | 26262.00 TSPAN17 | 9.43         | 4.59           | 1.17            |
| 50012.00 B15 | M-009874- tenascin R (resti | 7143.00 TNR      | 1.86         | 2.98           | -0.76           |
| 50012.00 B16 | M-012917- F-box protein 21  | 23014.00 FBXO21  | 3.53         | 1.31           | -0.33           |
| 50012.00 B17 | M-019434- transducer of EF  | 10766.00 TOB2    | 2.33         | 2.51           | -0.64           |
| 50012.00 B18 | M-005204- F-box and leucir  | 54850.00 FBXL12  | 6.28         | 1.44           | 0.37            |
| 50012.00 B19 | M-005278- topoisomerase I   | 7150.00 TOP1     | 2.86         | 1.98           | -0.51           |
| 50012.00 B20 | M-003954- fatty acid syntha | 2194.00 FASN     | 12.05        | 7.21           | 1.84            |
| 50012.00 B21 | M-004239- topoisomerase I   | 7153.00 TOP2A    | 8.22         | 3.38           | 0.86            |
| 50012.00 B23 | M-004451- Fas apoptotic in  | 9214.00 FAIM3    | 0.00         | 4.84           | -1.24           |
| 50012.00 C02 | M-015873- transducin-like e | 7089.00 TLE2     | 6.49         | 1.65           | 0.42            |
| 50012.00 C04 | M-015528- transducin-like e | 7088.00 TLE1     | 1.90         | 2.94           | -0.75           |
| 50012.00 C05 | M-013770- UDP glucuronos    | 54659.00 UGT1A3  | 1.01         | 3.83           | -0.98           |
| 50012.00 C06 | M-007746- tight junction pr | 7082.00 TJP1     | 8.43         | 3.59           | 0.91            |
| 50012.00 C07 | M-019627- UDP glucuronos    | 54657.00 UGT1A4  | 7.58         | 2.74           | 0.70            |
| 50012.00 C08 | M-019951- TERF1 (TRF1)-in   | 26277.00 TINF2   | 6.84         | 2.00           | 0.51            |

|              |                             |                      |              |              |       |
|--------------|-----------------------------|----------------------|--------------|--------------|-------|
| 50012.00 C09 | M-020196- UDP glucuronos    | 54578.00 UGT1A6      | 1.60         | 3.24         | -0.83 |
| 50012.00 C10 | M-019959- pleckstrin and S  | 23550.00 PSD4        | 1.55         | 3.29         | -0.84 |
| 50012.00 C11 | M-018274- UDP glucuronos    | 54576.00 UGT1A8      | 3.59         | 1.25         | -0.32 |
| 50012.00 C12 | M-008434- T-cell lymphoma   | 26230.00 TIAM2       | 3.80         | 1.04         | -0.27 |
| 50012.00 C13 | M-014083- UDP glucuronos    | 54600.00 UGT1A9      | 2.63         | 2.21         | -0.57 |
| 50012.00 C14 | M-011921- TGFB1-induced     | 9220.00 TIAF1        | 1.85         | 2.99         | -0.76 |
| 50012.00 C15 | M-020194- UDP glucuronos    | 7366.00 UGT2B15      | 3.29         | 1.55         | -0.40 |
| 50012.00 C16 | M-015337- Thy-1 cell surfac | 7070.00 THY1         | 1.87         | 2.97         | -0.76 |
| 50012.00 C17 | M-014139- UDP glucuronos    | 7363.00 UGT2B4       | 3.73         | 1.11         | -0.28 |
| 50012.00 C18 | M-019569- thyroid hormon    | 7069.00 THRSP        | 6.99         | 2.15         | 0.55  |
| 50012.00 C19 | M-010270- UDP glycosyltra   | 7368.00 UGT8         | 11.83        | 6.99         | 1.78  |
| 50012.00 C20 | M-012552- thrombopoietin    | 7066.00 THPO         | 1.85         | 2.99         | -0.76 |
| 50012.00 C21 | M-009828- uridine monoph    | 7372.00 UMPS         | 4.32         | 0.52         | -0.13 |
| 50012.00 C23 | M-011795- uracil-DNA glycc  | 7374.00 UNG          | 0.60         | 4.24         | -1.08 |
| 50012.00 D02 | M-009364- acyl-CoA synthe   | 2182.00 ACSL4        | 4.76         | 0.08         | -0.02 |
| 50012.00 D04 | M-010061- acyl-CoA synthe   | 2181.00 ACSL3        | 8.10         | 3.26         | 0.83  |
| 50012.00 D05 | M-010569- TP53 activated p  | 11257.00 TP53AP1     | 9.97         | 5.13         | 1.31  |
| 50012.00 D06 | M-005872- coagulation fact  | 2158.00 F9           | 4.47         | 0.37         | -0.10 |
| 50012.00 D07 | M-019450- tumor protein p   | 9537.00 TP53I11      | 6.60         | 1.76         | 0.45  |
| 50012.00 D08 | M-005871- coagulation fact  | 2155.00 F7           | 8.81         | 3.97         | 1.01  |
| 50012.00 D09 | M-016159- tumor protein p   | 94241.00 TP53INP1    | 0.89         | 3.95         | -1.01 |
| 50012.00 D10 | M-011853- eyes absent hor   | 2070.00 EYA4         | 6.33         | 1.49         | 0.38  |
| 50012.00 D11 | M-020287- TP53TG3 protei    | 24150.00 TP53TG3     | 0.73         | 4.11         | -1.05 |
| 50012.00 D12 | M-011653- eyes absent hor   | 2140.00 EYA3         | 10.61        | 5.77         | 1.47  |
| 50012.00 D13 | M-004304- trophoblast glyc  | 7162.00 TPBG         | 3.78         | 1.06         | -0.27 |
| 50012.00 D14 | M-017392- eyes absent hor   | 2138.00 EYA1         | 3.49         | 1.35         | -0.35 |
| 50012.00 D15 | M-019903- tumor protein C   | 7163.00 TPD52        | 0.50         | 4.34         | -1.11 |
| 50012.00 D16 | M-013120- exonuclease 1     | 9156.00 EXO1         | 8.18         | 3.34         | 0.85  |
| 50012.00 D17 | M-019567- tumor protein C   | 7164.00 TPD52L1      | 9.40         | 4.56         | 1.16  |
| 50012.00 D18 | M-006626- excision repair c | 2073.00 ERCC5        | 6.66         | 1.82         | 0.46  |
| 50012.00 D19 | M-019568- tumor protein C   | 7165.00 TPD52L2      | 7.02         | 2.18         | 0.56  |
| 50012.00 D20 | M-011027- excision repair c | 2068.00 ERCC2        | 7.09         | 2.25         | 0.57  |
| 50012.00 D21 | M-010548- translocated pro  | 7175.00 TPR          | 15.54        | 10.70        | 2.73  |
| 50012.00 D23 | M-004559- tumor protein, t  | 7178.00 TPT1         | 1.20         | 3.64         | -0.93 |
| 50012.00 E02 | M-019911- THO complex 1     | 9984.00 THOC1        | 2.22         | 2.62         | -0.67 |
| 50012.00 E04 | M-017078- Theg homolog (    | 51298.00 THEG        | 4.91         | 0.07         | 0.02  |
| 50012.00 E05 | M-008515- cyclin U          | 10309.00 CCNU        | 3.77         | 1.07         | -0.27 |
| 50012.00 E06 | M-019638- thrombospondi     | 7059.00 <u>THBS3</u> | <u>16.37</u> | <u>11.53</u> | 2.94  |
| 50012.00 E07 | M-006647- uridine phosphc   | 7378.00 UPP1         | 2.27         | 2.57         | -0.66 |
| 50012.00 E08 | M-010544- transforming gr   | 7042.00 TGFB2        | 3.50         | 1.34         | -0.34 |
| 50012.00 E09 | M-032278- ubiquinol-cytocl  | 10975.00 UQCR        | 4.91         | 0.07         | 0.02  |
| 50012.00 E10 | M-020381- TCF3 (E2A) fusic  | 29844.00 TFPT        | 3.13         | 1.71         | -0.44 |
| 50012.00 E11 | M-004748- ubiquinol-cytocl  | 7384.00 UQCRC1       | 1.36         | 3.49         | -0.89 |
| 50012.00 E12 | M-004118- testis enhanced   | 7009.00 TEGT         | 3.32         | 1.52         | -0.39 |
| 50012.00 E13 | M-008334- ubiquinol-cytocl  | 7385.00 UQCRC2       | 4.41         | 0.43         | -0.11 |
| 50012.00 E14 | M-008769- thyrotrophic err  | 7008.00 TEF          | 2.53         | 2.31         | -0.59 |
| 50012.00 E15 | M-020100- ubiquinol-cytocl  | 7386.00 UQCRFS1      | 3.09         | 1.75         | -0.45 |

|              |                             |                        |              |              |       |
|--------------|-----------------------------|------------------------|--------------|--------------|-------|
| 50012.00 E16 | M-019570- TEA domain far    | 7004.00 TEAD4          | 2.47         | 2.37         | -0.60 |
| 50012.00 E17 | M-020101- ubiquinol-cytochl | 7388.00 UQCRH          | 7.67         | 2.83         | 0.72  |
| 50012.00 E18 | M-010568- serine incorpora  | 10955.00 SERINC3       | 6.19         | 1.35         | 0.34  |
| 50012.00 E19 | M-013415- uroporphyrinog    | 7389.00 UROD           | 8.40         | 3.56         | 0.91  |
| 50012.00 E20 | M-019640- T-cell leukemia   | 6988.00 TCTA           | 0.73         | 4.11         | -1.05 |
| 50012.00 E21 | M-008471- uroporphyrinog    | 7390.00 UROS           | 2.34         | 2.50         | -0.64 |
| 50012.00 E23 | M-011905- vanin 1           | 8876.00 VNN1           | 1.92         | 2.92         | -0.75 |
| 50012.00 F02 | M-006311- excision repair c | 2067.00 ERCC1          | 0.81         | 4.03         | -1.03 |
| 50012.00 F04 | M-010006- epoxide hydrola   | 2053.00 <u>EPHX2</u>   | <u>10.42</u> | 5.58         | 1.42  |
| 50012.00 F05 | M-017630- TR4 orphan rece   | 126382.00 TRA16        | 6.14         | 1.30         | 0.33  |
| 50012.00 F06 | M-011235- ectonucleoside    | 957.00 ENTPD5          | 5.84         | 1.00         | 0.25  |
| 50012.00 F07 | M-017438- TNF receptor-as   | 7185.00 TRAF1          | 2.95         | 1.89         | -0.48 |
| 50012.00 F08 | M-011234- ectonucleoside    | 956.00 <u>ENTPD3</u>   | <u>16.41</u> | <u>11.57</u> | 2.95  |
| 50012.00 F09 | M-018676- translocation as  | 23471.00 TRAM1         | 5.38         | 0.54         | 0.14  |
| 50012.00 F10 | M-015973- ectonucleoside    | 953.00 ENTPD1          | 3.28         | 1.56         | -0.40 |
| 50012.00 F11 | M-021247- thyroid hormon    | 9862.00 THRAP4         | 4.60         | 0.24         | -0.06 |
| 50012.00 F12 | M-004540- ectonucleotide    | 5169.00 ENPP3          | 1.62         | 3.22         | -0.82 |
| 50012.00 F13 | M-012683- COP9 constituti   | 9318.00 COPS2          | 3.34         | 1.50         | -0.38 |
| 50012.00 F14 | M-005865- glutamyl amino    | 2028.00 ENPEP          | 3.02         | 1.82         | -0.47 |
| 50012.00 F15 | M-020945- SERTA domain c    | 9792.00 SERTAD2        | 2.96         | 1.88         | -0.48 |
| 50012.00 F16 | M-013961- AT hook contain   | 25909.00 AHCTF1        | 3.85         | 0.99         | -0.25 |
| 50012.00 F17 | M-006109- transient recept  | 8989.00 TRPA1          | 5.47         | 0.63         | 0.16  |
| 50012.00 F18 | M-019879- etoposide induc   | 9538.00 EI24           | 4.02         | 0.82         | -0.21 |
| 50012.00 F19 | M-006516- transient recept  | 29850.00 TRPM5         | 2.38         | 2.46         | -0.63 |
| 50012.00 F20 | M-021395- ER degradation    | 9695.00 EDEM1          | 10.34        | 5.50         | 1.40  |
| 50012.00 F21 | M-006517- transient recept  | 79054.00 TRPM8         | 2.73         | 2.11         | -0.54 |
| 50012.00 F23 | M-006518- transient recept  | 7442.00 TRPV1          | 4.10         | 0.74         | -0.19 |
| 50012.00 G02 | M-019892- T-cell leukemia/  | 9623.00 <u>TCL1B</u>   | <u>17.86</u> | <u>13.02</u> | 3.32  |
| 50012.00 G04 | M-012608- T-cell leukemia/  | 8115.00 TCL1A          | 2.59         | 2.25         | -0.57 |
| 50012.00 G05 | M-013038- vanin 2           | 8875.00 <u>VNN2</u>    | <u>16.32</u> | <u>11.48</u> | 2.92  |
| 50012.00 G06 | M-005144- transcription elc | 51224.00 TCEB3B        | 3.89         | 0.95         | -0.24 |
| 50012.00 G07 | M-009682- abhydrolase doi   | 83451.00 <u>ABHD11</u> | <u>14.05</u> | <u>9.21</u>  | 2.35  |
| 50012.00 G08 | M-024872- T-box 18          | 9096.00 TBX18          | 15.58        | <u>10.74</u> | 2.74  |
| 50012.00 G09 | M-006101- X-prolyl aminop   | 7511.00 XPNPEP1        | 4.47         | 0.37         | -0.10 |
| 50012.00 G10 | M-012195- T-box 1           | 6899.00 TBX1           | 9.54         | 4.70         | 1.20  |
| 50012.00 G11 | M-006104- zinc metallopep   | 10269.00 ZMPSTE24      | 7.68         | 2.84         | 0.72  |
| 50012.00 G12 | M-012152- transducin (beta  | 6907.00 TBL1X          | 12.22        | 7.38         | 1.88  |
| 50012.00 G13 | M-012565- ABO blood grou    | 28.00 ABO              | 5.40         | 0.56         | 0.14  |
| 50012.00 G14 | M-011402- tubulin folding c | 6905.00 TBCE           | 12.61        | 7.77         | 1.98  |
| 50012.00 G15 | M-009218- amiloride bindir  | 26.00 ABP1             | 7.00         | 2.16         | 0.55  |
| 50012.00 G16 | M-013416- tubulin folding c | 6904.00 TBCD           | 6.54         | 1.70         | 0.43  |
| 50012.00 G17 | M-004551- acetyl-Coenzym    | 31.00 ACACA            | 8.39         | 3.55         | 0.90  |
| 50012.00 G18 | M-011401- tubulin folding c | 6903.00 TBCC           | 14.66        | <u>9.82</u>  | 2.50  |
| 50012.00 G19 | M-004759- acetyl-Coenzym    | 32.00 ACACB            | 6.10         | 1.26         | 0.32  |
| 50012.00 G20 | M-011895- tubulin folding c | 6902.00 TBCA           | 9.74         | 4.90         | 1.25  |
| 50012.00 G21 | M-010396- acyl-CoA synthe   | 55902.00 ACSS2         | 12.06        | 7.22         | 1.84  |
| 50012.00 G23 | M-005754- angiotensin I co  | 1636.00 ACE            | 4.37         | 0.47         | -0.12 |

|              |                              |                           |              |              |       |
|--------------|------------------------------|---------------------------|--------------|--------------|-------|
| 50012.00 H02 | M-005859- endothelin conv    | 9427.00 ECEL1             | 6.38         | 1.54         | 0.39  |
| 50012.00 H04 | M-005857- endothelin conv    | 1889.00 ECE1              | 9.22         | 4.38         | 1.11  |
| 50012.00 H05 | M-004453- spermatogenesi     | 130560.00 SPATA3          | 12.48        | 7.64         | 1.95  |
| 50012.00 H06 | M-011023- torsin family 1, i | 1861.00 TOR1A             | 1.32         | 3.52         | -0.90 |
| 50012.00 H07 | M-003028- tuberous sclero:   | 7248.00 <u>TSC1</u>       | <u>14.89</u> | <u>10.05</u> | 2.56  |
| 50012.00 H08 | M-010258- dUTP pyrophosp     | 1854.00 DUT               | 11.04        | 6.20         | 1.58  |
| 50012.00 H09 | M-011410- tumor suppressi    | 7260.00 TSSC1             | 15.52        | <b>10.68</b> | 2.72  |
| 50012.00 H10 | M-012951- DBF4 homolog f     | 80174.00 DBF4B            | 4.99         | 0.15         | 0.04  |
| 50012.00 H11 | M-012155- tumor suppressi    | 10078.00 TSSC4            | 11.92        | 7.08         | 1.80  |
| 50012.00 H12 | M-009702- deoxynucleotid     | 1791.00 DNNT              | 7.59         | 2.75         | 0.70  |
| 50012.00 H13 | M-010120- thiosulfate sulfu  | 7263.00 TST               | 7.50         | 2.66         | 0.68  |
| 50012.00 H14 | M-006395- DNA (cytosine-5    | 1789.00 DNMT3B            | 15.61        | <b>10.77</b> | 2.74  |
| 50012.00 H15 | M-019824- tetratricopeptid   | 7268.00 TTC4              | 8.72         | 3.88         | 0.99  |
| 50012.00 H16 | M-006672- DNA (cytosine-5    | 1788.00 DNMT3A            | 8.78         | 3.94         | 1.00  |
| 50012.00 H17 | M-017384- tubby homolog      | 7275.00 TUB               | 5.01         | 0.17         | 0.04  |
| 50012.00 H18 | M-006671- tRNA aspartic ac   | 1787.00 TRDMT1            | 16.88        | <b>12.04</b> | 3.07  |
| 50012.00 H19 | M-013150- tubulin, alpha 1i  | 7846.00 TUBA1A            | 18.07        | <b>13.23</b> | 3.37  |
| 50012.00 H20 | M-004605- DNA (cytosine-5    | 1786.00 DNMT1             | 2.01         | 2.83         | -0.72 |
| 50012.00 H21 | M-009374- tubulin, alpha 8   | 51807.00 TUBA8            | 9.60         | 4.76         | 1.21  |
| 50012.00 H23 | M-008265- tubulin, beta 2C   | 10383.00 TUBB2C           | 7.27         | 2.43         | 0.62  |
| 50012.00 I02 | M-032269- Tax1 (human T-ri   | 10883.00 TAX1BP2          | 8.73         | 3.89         | 0.99  |
| 50012.00 I04 | M-014003- leucine rich rep   | 23507.00 LRRC8B           | 12.22        | 7.38         | 1.88  |
| 50012.00 I05 | M-009482- acetylcholineste   | 43.00 ACHE                | 2.44         | 2.40         | -0.61 |
| 50012.00 I06 | M-008948- chromodomain       | 1106.00 CHD2              | 9.37         | 4.53         | 1.15  |
| 50012.00 I07 | M-014157- apoptotic chron    | 22985.00 ACIN1            | 5.91         | 1.07         | 0.27  |
| 50012.00 I08 | M-009881- mitochondrial tr   | 51102.00 MECR             | 6.94         | 2.10         | 0.53  |
| 50012.00 I09 | M-004505- ADAM metallo       | 8751.00 ADAM15            | 7.51         | 2.67         | 0.68  |
| 50012.00 I10 | M-009485- cholesteryl este   | 1071.00 CETP              | 11.73        | 6.89         | 1.75  |
| 50012.00 I11 | M-003453- ADAM metallo       | 6868.00 ADAM17            | 4.17         | 0.67         | -0.17 |
| 50012.00 I12 | M-008521- chromodomain       | 9425.00 CDYL              | 5.02         | 0.18         | 0.04  |
| 50012.00 I13 | M-004523- ADAM metallo       | 8748.00 ADAM20            | 3.94         | 0.90         | -0.23 |
| 50012.00 I14 | M-008566- chaperonin cont    | 10694.00 CCT8             | 3.01         | 1.83         | -0.47 |
| 50012.00 I15 | M-004524- ADAM metallo       | 8747.00 ADAM21            | 6.51         | 1.67         | 0.42  |
| 50012.00 I16 | M-004405- caspase 5, apop    | 838.00 CASP5              | 1.33         | 3.51         | -0.90 |
| 50012.00 I17 | M-005758- ADAM metallo       | 10863.00 ADAM28           | 7.07         | 2.23         | 0.57  |
| 50012.00 I18 | M-004404- caspase 4, apop    | 837.00 CASP4              | 7.16         | 2.32         | 0.59  |
| 50012.00 I19 | M-005759- ADAM metallo       | 11085.00 <u>ADAM30</u>    | <u>19.70</u> | <u>14.86</u> | 3.79  |
| 50012.00 I20 | M-003465- caspase 2, apop    | 835.00 CASP2              | 7.81         | 2.97         | 0.76  |
| 50012.00 I21 | M-005762- ADAM metallo       | 81794.00 ADAMTS10         | 4.75         | 0.09         | -0.02 |
| 50012.00 I23 | M-005766- ADAM metallo       | 170689.00 <u>ADAMTS15</u> | <u>18.27</u> | <u>13.43</u> | 3.42  |
| 50012.00 J02 | M-012092- dynamin 1-like     | 10059.00 DNM1L            | 4.25         | 0.59         | -0.15 |
| 50012.00 J04 | M-009667- deoxyribonuclea    | 1777.00 DNASE2            | 7.66         | 2.82         | 0.72  |
| 50012.00 J05 | M-009293- tubulin, gamma     | 27175.00 <u>TUBG2</u>     | <u>17.43</u> | <u>12.59</u> | 3.21  |
| 50012.00 J06 | M-016280- deoxyribonuclea    | 1773.00 DNASE1            | 6.56         | 1.72         | 0.44  |
| 50012.00 J07 | M-020208- tubulin, gamma     | 10844.00 TUBGCP2          | 7.70         | 2.86         | 0.73  |
| 50012.00 J08 | M-009551- DMC1 dosage si     | 11144.00 DMC1             | 5.01         | 0.17         | 0.04  |
| 50012.00 J09 | M-011413- tubby like prote   | 7287.00 TULP1             | 4.94         | 0.10         | 0.02  |



|              |                             |                         |              |              |             |
|--------------|-----------------------------|-------------------------|--------------|--------------|-------------|
| 50012.00 J10 | M-014695- fumarylacetoac    | 81889.00 FAHD1          | 2.78         | 2.06         | -0.53       |
| 50012.00 J11 | M-011414- tubby like prote  | 7288.00 TULP2           | 2.50         | 2.34         | -0.60       |
| 50012.00 J12 | M-011477- DEAH (Asp-Glu-    | 8449.00 DHX16           | 5.18         | 0.34         | 0.09        |
| 50012.00 J13 | M-006340- thioredoxin       | 7295.00 TXN             | 3.62         | 1.22         | -0.31       |
| 50012.00 J14 | M-004425- DNA fragmenta     | 1677.00 DFFB            | 3.20         | 1.64         | -0.42       |
| 50012.00 J15 | M-008236- thioredoxin redi  | 7296.00 TXNRD1          | 3.59         | 1.25         | -0.32       |
| 50012.00 J16 | M-004424- DNA fragmenta     | 1676.00 <b>DFFA</b>     | <b>15.20</b> | <b>10.36</b> | <b>2.64</b> |
| 50012.00 J17 | M-004717- thymidylate syn   | 7298.00 TYMS            | 6.15         | 1.31         | 0.33        |
| 50012.00 J18 | M-006371- DEAD (Asp-Glu-    | 1656.00 DDX6            | 0.79         | 4.05         | -1.03       |
| 50012.00 J19 | M-017474- ubiquitin associ  | 51271.00 UBAP1          | 0.39         | 4.45         | -1.14       |
| 50012.00 J20 | M-013472- DEAD (Asp-Glu-    | 11218.00 DDX20          | 1.84         | 3.00         | -0.77       |
| 50012.00 J21 | M-013168- ubiquitin associ  | 55833.00 UBAP2          | 1.82         | 3.02         | -0.77       |
| 50012.00 J23 | M-013382- ubiquitin B       | 7314.00 UBB             | 2.78         | 2.06         | -0.53       |
| 50012.00 K02 | M-004402- caspase 10, apo   | 843.00 CASP10           | 9.27         | 4.43         | 1.13        |
| 50012.00 K04 | M-009979- calpain, small su | 826.00 CAPNS1           | 3.32         | 1.52         | -0.39       |
| 50012.00 K05 | M-005768- ADAM metallo      | 170691.00 ADAMTS17      | 2.19         | 2.65         | -0.68       |
| 50012.00 K06 | M-005804- calpain 2, (m/II) | 824.00 CAPN2            | 4.53         | 0.31         | -0.08       |
| 50012.00 K07 | M-005770- ADAM metallo      | 171019.00 ADAMTS19      | 10.49        | 5.65         | 1.44        |
| 50012.00 K08 | M-005799- calpain 1, (mu/I  | 823.00 CAPN1            | 9.78         | 4.94         | 1.26        |
| 50012.00 K09 | M-005772- ADAM metallo      | 80070.00 ADAMTS20       | 3.12         | 1.72         | -0.44       |
| 50012.00 K10 | M-005244- carbonic anhydr   | 768.00 CA9              | 2.58         | 2.26         | -0.58       |
| 50012.00 K11 | M-005773- ADAM metallo      | 9508.00 ADAMTS3         | 6.09         | 1.25         | 0.32        |
| 50012.00 K12 | M-003634- carbonic anhydr   | 771.00 CA12             | 8.37         | 3.53         | 0.90        |
| 50012.00 K13 | M-003807- ADAM metallo      | 9507.00 ADAMTS4         | 5.25         | 0.41         | 0.10        |
| 50012.00 K14 | M-013379- regulator of telc | 51750.00 RTEL1          | 5.50         | 0.66         | 0.17        |
| 50012.00 K15 | M-005776- ADAM metallo      | 11174.00 ADAMTS6        | 10.45        | 5.61         | 1.43        |
| 50012.00 K16 | M-020234- ER degradation    | 55741.00 EDEM2          | 0.52         | 4.32         | -1.10       |
| 50012.00 K17 | M-005777- ADAM metallo      | 11173.00 ADAMTS7        | 8.03         | 3.19         | 0.81        |
| 50012.00 K18 | M-005796- complement co     | 716.00 C1S              | 5.19         | 0.35         | 0.09        |
| 50012.00 K19 | M-005779- ADAM metallo      | 56999.00 <b>ADAMTS9</b> | <b>8.81</b>  | <b>3.97</b>  | <b>1.01</b> |
| 50012.00 K20 | M-005795- complement co     | 715.00 C1R              | 8.20         | 3.36         | 0.86        |
| 50012.00 K21 | M-006520- alcohol dehydr    | 124.00 ADH1A            | 7.83         | 2.99         | 0.76        |
| 50012.00 K23 | M-006521- alcohol dehydr    | 126.00 ADH1C            | 9.98         | 5.14         | 1.31        |
| 50012.00 L02 | M-013451- DEAD (Asp-Glu-    | 8886.00 DDX18           | 4.65         | 0.19         | -0.05       |
| 50012.00 L04 | M-011843- DEAD/H (Asp-Gl    | 1663.00 DDX11           | 12.52        | 7.68         | 1.96        |
| 50012.00 L05 | M-019408- ubiquitin C       | 7316.00 UBC             | 3.43         | 1.41         | -0.36       |
| 50012.00 L06 | M-005256- dopachrome ta     | 1638.00 <b>DCT</b>      | <b>18.84</b> | <b>14.00</b> | <b>3.57</b> |
| 50012.00 L07 | M-008266- ubiquitin D       | 10537.00 UBD            | 4.17         | 0.67         | -0.17       |
| 50012.00 L08 | M-010790- DNA cross-link r  | 9937.00 <b>DCLRE1A</b>  | <b>12.96</b> | <b>8.12</b>  | <b>2.07</b> |
| 50012.00 L09 | M-019759- ubiquitin-activa  | 7318.00 UBE1L           | 3.15         | 1.69         | -0.43       |
| 50012.00 L10 | M-008279- dihydrolipoamic   | 1629.00 DBT             | 2.97         | 1.87         | -0.48       |
| 50012.00 L11 | M-010154- ubiquitin-conju   | 7326.00 UBE2G1          | 3.99         | 0.85         | -0.22       |
| 50012.00 L12 | M-010052- dopamine beta-    | 1621.00 DBH             | 8.03         | 3.19         | 0.81        |
| 50012.00 L13 | M-008569- ubiquitin-conju   | 9246.00 UBE2L6          | 0.17         | 4.67         | -1.19       |
| 50012.00 L14 | M-010334- aspartyl-tRNA sy  | 1615.00 DARS            | 5.52         | 0.68         | 0.17        |
| 50012.00 L15 | M-004348- ubiquitin-conju   | 9040.00 UBE2M           | 1.30         | 3.54         | -0.90       |
| 50012.00 L16 | M-009550- cytochrome P45    | 1565.00 CYP2D6          | 9.09         | 4.25         | 1.08        |



|              |                              |                       |              |              |       |
|--------------|------------------------------|-----------------------|--------------|--------------|-------|
| 50012.00 L17 | M-003920- ubiquitin-conjug   | 7334.00 UBE2N         | 5.32         | 0.48         | 0.12  |
| 50012.00 L18 | M-008736- cytochrome P45     | 1557.00 CYP2C19       | 10.27        | 5.43         | 1.38  |
| 50012.00 L19 | M-016005- SMT3 suppressor    | 7341.00 SUMO1         | 7.54         | 2.70         | 0.69  |
| 50012.00 L20 | M-009709- cytochrome P45     | 1562.00 CYP2C18       | 6.47         | 1.63         | 0.41  |
| 50012.00 L21 | M-012786- ubiquitin-like 3   | 5412.00 UBL3          | 7.84         | 3.00         | 0.76  |
| 50012.00 L23 | M-014320- ubiquitin-like 5   | 59286.00 UBL5         | 4.87         | 0.03         | 0.01  |
| 50012.00 M02 | M-017140- ER degradation     | 80267.00 <u>EDEM3</u> | <u>7.88</u>  | 3.04         | 0.77  |
| 50012.00 M04 | M-019554- Ras association    | 8045.00 RASSF7        | 4.29         | 0.55         | -0.14 |
| 50012.00 M05 | M-008412- ADP-ribosylargin   | 141.00 ADPRH          | 8.41         | 3.57         | 0.91  |
| 50012.00 M06 | M-010587- BRCA1 interacti    | 83990.00 <u>BRIP1</u> | <u>16.66</u> | <u>11.82</u> | 3.01  |
| 50012.00 M07 | M-010127- poly (ADP-ribosyl  | 10038.00 PARP2        | 7.81         | 2.97         | 0.76  |
| 50012.00 M08 | M-007287- Bloom syndrom      | 641.00 BLM            | 12.23        | 7.39         | 1.88  |
| 50012.00 M09 | M-009289- adenylosuccinat    | 159.00 <u>ADSS</u>    | <u>11.64</u> | 6.80         | 1.73  |
| 50012.00 M10 | M-004389- NLR family, apo    | 4671.00 NAIP          | 9.87         | 5.03         | 1.28  |
| 50012.00 M11 | M-005780- AFG3 ATPase fa     | 172.00 AFG3L1         | 12.14        | 7.30         | 1.86  |
| 50012.00 M12 | M-009826- butyrylcholinest   | 590.00 <u>BCHE</u>    | <u>18.50</u> | <u>13.66</u> | 3.48  |
| 50012.00 M13 | M-021409- activation-induc   | 57379.00 AICDA        | 9.85         | 5.01         | 1.27  |
| 50012.00 M14 | M-006937- euchromatic his    | 10919.00 EHMT2        | 7.95         | 3.11         | 0.79  |
| 50012.00 M15 | M-021423- AT-hook transcr    | 80709.00 AKNA         | 7.81         | 2.97         | 0.76  |
| 50012.00 M16 | M-009532- acyl-CoA thioest   | 11332.00 ACOT7        | 8.21         | 3.37         | 0.86  |
| 50012.00 M17 | M-009022- arachidonate lip   | 59344.00 ALOXE3       | 5.40         | 0.56         | 0.14  |
| 50012.00 M18 | M-008457- AU RNA binding     | 549.00 AUH            | 5.63         | 0.79         | 0.20  |
| 50012.00 M19 | M-008658- alkaline phosph    | 249.00 ALPL           | 4.70         | 0.14         | -0.04 |
| 50012.00 M20 | M-010257- argininosuccinat   | 445.00 ASS1           | 6.78         | 1.94         | 0.49  |
| 50012.00 M21 | M-003455- alkaline phosph    | 251.00 ALPPL2         | 3.97         | 0.87         | -0.22 |
| 50012.00 M23 | M-013843- anaphase prom      | 64682.00 ANAPC1       | 5.79         | 0.95         | 0.24  |
| 50012.00 N02 | M-011167- cytochrome P45     | 1549.00 CYP2A7        | 3.28         | 1.56         | -0.40 |
| 50012.00 N04 | M-008781- cytochrome P45     | 1548.00 CYP2A6        | 4.60         | 0.24         | -0.06 |
| 50012.00 N05 | M-014195- ubinuclein 1       | 29855.00 <u>UBN1</u>  | <u>12.01</u> | 7.17         | 1.83  |
| 50012.00 N06 | M-009757- cytochrome P45     | 1594.00 CYP27B1       | 19.33        | <u>14.49</u> | 3.69  |
| 50012.00 N07 | M-021183- ubiquitin family   | 56061.00 <u>UBFD1</u> | <u>13.04</u> | <u>8.20</u>  | 2.09  |
| 50012.00 N08 | M-004790- cytochrome P45     | 1543.00 CYP1A1        | 4.31         | 0.53         | -0.14 |
| 50012.00 N09 | M-012942- ubiquilin 1        | 29979.00 UBQLN1       | 9.03         | 4.19         | 1.07  |
| 50012.00 N10 | M-008469- cytochrome P45     | 1586.00 CYP17A1       | 11.35        | 6.51         | 1.66  |
| 50012.00 N11 | M-013398- ubiquilin 3        | 50613.00 UBQLN3       | 9.74         | 4.90         | 1.25  |
| 50012.00 N12 | M-009021- cytochrome P45     | 1585.00 CYP11B2       | 1.33         | 3.51         | -0.90 |
| 50012.00 N13 | M-012557- UDP glucuronos     | 54658.00 UGT1A1       | 6.74         | 1.90         | 0.48  |
| 50012.00 N14 | M-008609- C-terminal bindi   | 1487.00 CTBP1         | 7.76         | 2.92         | 0.74  |
| 50012.00 N15 | M-009734- unc-119 homolc     | 9094.00 <u>UNC119</u> | <u>12.06</u> | 7.22         | 1.84  |
| 50012.00 N16 | M-009150- crystallin, zeta ( | 9946.00 <u>CRYZL1</u> | <u>13.71</u> | <u>8.87</u>  | 2.26  |
| 50012.00 N17 | M-012268- unc-13 homolog     | 10497.00 UNC13B       | 10.31        | 5.47         | 1.39  |
| 50012.00 N18 | M-009891- crystallin, zeta ( | 1429.00 CRYZ          | 3.51         | 1.33         | -0.34 |
| 50012.00 N19 | M-015787- ubiquinol-cytocl   | 7381.00 UQCRB         | 7.11         | 2.27         | 0.58  |
| 50012.00 N20 | M-009275- carbamoyl-phos     | 1373.00 CPS1          | 11.71        | 6.87         | 1.75  |
| 50012.00 N21 | M-021440- clarin 1           | 7401.00 CLRN1         | 4.10         | 0.74         | -0.19 |
| 50012.00 N23 | M-015465- UV radiation res   | 7405.00 UVRAG         | 1.13         | 3.71         | -0.95 |
| 50012.00 O02 | M-009814- arylsulfatase B    | 411.00 ARSB           | 6.74         | 1.90         | 0.48  |

|              |                                        |                    |       |      |       |
|--------------|----------------------------------------|--------------------|-------|------|-------|
| 50012.00 O04 | M-009558- arylsulfatase A              | 410.00 ARSA        | 3.05  | 1.79 | -0.46 |
| 50012.00 O05 | M-016095- anaphase prom                | 51433.00 ANAPC5    | 5.68  | 0.84 | 0.21  |
| 50012.00 O06 | M-012083- ADP-ribosylatio              | 10124.00 ARL4A     | 8.01  | 3.17 | 0.81  |
| 50012.00 O07 | M-011206- angiogenin, ribc             | 283.00 ANG         | 4.79  | 0.05 | -0.01 |
| 50012.00 O08 | M-009943- ras homolog ge               | 23433.00 RHOQ      | 3.62  | 1.22 | -0.31 |
| 50012.00 O09 | M-019944- apolipoprotein I             | 10930.00 APOBEC2   | 2.87  | 1.97 | -0.50 |
| 50012.00 O10 | M-009727- Rho family GTPa              | 8153.00 RND2       | 3.42  | 1.42 | -0.36 |
| 50012.00 O11 | M-017432- apolipoprotein I             | 200315.00 APOBEC3A | 3.55  | 1.29 | -0.33 |
| 50012.00 O12 | M-010367- ras homolog ge               | 57381.00 RHOJ      | 3.94  | 0.90 | -0.23 |
| 50012.00 O13 | M-013711- apolipoprotein I             | 27350.00 APOBEC3C  | 4.47  | 0.37 | -0.09 |
| 50012.00 O14 | M-008660- DIRAS family, G <sup>-</sup> | 9077.00 DIRAS3     | 5.61  | 0.77 | 0.19  |
| 50012.00 O15 | M-013072- apolipoprotein I             | 60489.00 APOBEC3G  | 4.56  | 0.28 | -0.07 |
| 50012.00 O16 | M-008995- ras homolog ge               | 391.00 RHOG        | 1.64  | 3.20 | -0.82 |
| 50012.00 O17 | M-011583- ADP-ribosylatio              | 379.00 ARL4D       | 5.59  | 0.75 | 0.19  |
| 50012.00 O18 | M-008316- ras homolog ge               | 54509.00 RHOF      | 4.41  | 0.43 | -0.11 |
| 50012.00 O19 | M-019250- ADP-ribosylatio              | 10139.00 ARFRP1    | 0.72  | 4.12 | -1.05 |
| 50012.00 O20 | M-008940- ras homolog ge               | 29984.00 RHOD      | 3.29  | 1.55 | -0.40 |
| 50012.00 O21 | M-009922- arginase, liver              | 383.00 ARG1        | 1.63  | 3.22 | -0.82 |
| 50012.00 O23 | M-008395- ras homolog ge               | 388.00 RHOB        | 0.77  | 4.07 | -1.04 |
| 50012.00 P02 | M-005826- carboxypeptida               | 1369.00 CPN1       | 2.29  | 2.55 | -0.65 |
| 50012.00 P04 | M-005825- carboxypeptida               | 1368.00 CPM        | 3.06  | 1.78 | -0.45 |
| 50012.00 P05 | M-013503- vesicle-associat             | 8673.00 VAMP8      | 4.82  | 0.03 | -0.01 |
| 50012.00 P06 | M-005823- carboxypeptida               | 1363.00 CPE        | 3.55  | 1.29 | -0.33 |
| 50012.00 P07 | M-011419- von Hippel-Lind              | 7411.00 VBP1       | 8.25  | 3.41 | 0.87  |
| 50012.00 P08 | M-005086- carboxypeptida               | 1362.00 CPD        | 3.93  | 0.91 | -0.23 |
| 50012.00 P09 | M-013684- pre-B lymphocy               | 29802.00 VPREB3    | 1.26  | 3.58 | -0.91 |
| 50012.00 P10 | M-009520- catechol-O-met               | 1312.00 COMT       | 1.40  | 3.44 | -0.88 |
| 50012.00 P11 | M-011806- vacuolar proteir             | 6293.00 VPS52      | 1.27  | 3.57 | -0.91 |
| 50012.00 P12 | M-020338- cyclin M4                    | 26504.00 CNNM4     | 2.88  | 1.96 | -0.50 |
| 50012.00 P13 | M-020300- catenin (cadheri             | 29119.00 CTNNA3    | 3.96  | 0.88 | -0.23 |
| 50012.00 P14 | M-008763- ClpX caseinolyti             | 10845.00 CLPX      | 2.90  | 1.94 | -0.50 |
| 50012.00 P15 | M-016062- visinin-like 1               | 7447.00 VSNL1      | 4.75  | 0.09 | -0.03 |
| 50012.00 P16 | M-009645- chromatin acces              | 54108.00 CHRAC1    | 4.12  | 0.72 | -0.19 |
| 50012.00 P17 | M-017572- WW domain bir                | 23558.00 WBP2      | 6.00  | 1.16 | 0.29  |
| 50012.00 P18 | M-009775- choline phospho              | 56994.00 CHPT1     | 1.26  | 3.58 | -0.91 |
| 50012.00 P19 | M-021349- NOL1/NOP2/Sun                | 55695.00 NSUN5     | 3.25  | 1.59 | -0.41 |
| 50012.00 P20 | M-011421- chitinase 1 (chit            | 1118.00 CHIT1      | 0.94  | 3.90 | -1.00 |
| 50012.00 P21 | M-013967- chitinase, acidic            | 27159.00 CHIA      | 3.11  | 1.73 | -0.44 |
| 50012.00 P23 | M-020491- transportin 2 (in            | 30000.00 TNPO2     | 2.47  | 2.37 | -0.61 |
|              |                                        | mdn                | 4.84  | 2.65 |       |
|              |                                        | 3xMAD              |       | 7.95 |       |
|              |                                        | MADc               |       | 3.92 |       |
| 50012.00 C22 |                                        |                    |       |      |       |
| 50012.00 D22 |                                        |                    | 35.99 |      | 24.38 |
| 50012.00 E22 |                                        |                    | 37.55 |      | 23.66 |
| 50012.00 F22 |                                        |                    | 37.72 |      | 20.85 |
|              |                                        |                    | 33.63 |      | 28.59 |

|              |                                            |         |           |       |       |
|--------------|--------------------------------------------|---------|-----------|-------|-------|
|              |                                            |         | mn        | 36.22 | 24.37 |
|              |                                            |         | sd        | 1.90  | 3.20  |
| 50012.00 G22 |                                            |         |           |       |       |
| 50012.00 H22 |                                            |         |           | 3.32  | 5.18  |
| 50012.00 I22 |                                            |         |           | 1.76  | 2.13  |
| 50012.00 J22 |                                            |         |           | 3.68  | 1.02  |
|              |                                            |         |           | 2.26  | 1.17  |
|              |                                            |         |           | 2.75  | 2.37  |
|              |                                            |         |           | 0.90  | 1.93  |
| 50012.00 G03 | M-003290- polo-like kinase                 | 5347.00 |           |       |       |
| 50012.00 H03 | M-003290- polo-like kinase                 | 5347.00 | PLK1 SMAF | 8.12  | 2.86  |
|              |                                            |         | PLK1 SMAF | 8.40  | 0.63  |
| 50012.00 I03 | D-001206-∴siControl non-targeting siRNA #2 |         |           |       |       |
| 50012.00 J03 | D-001206-∴siControl non-targeting siRN     |         |           | 6.14  | 3.22  |
|              |                                            |         |           | 3.26  | 2.52  |
| 50012.00 K03 | D-001600-(∴siGLO RISC-free siRNA           |         |           |       |       |
| 50012.00 L03 | D-001600-(∴siGLO RISC-free siRNA           |         |           | 18.85 | 16.99 |
|              |                                            |         |           | 17.38 | 17.10 |

| <u>% inf</u> | <u>abs dev</u> | <u>robust Z</u> | <u>% inf</u> | <u>abs dev</u> | <u>robust Z</u> |
|--------------|----------------|-----------------|--------------|----------------|-----------------|
| 0.39         | 3.05           | -1.16           | 0.87         | 2.54           | -0.94           |
| 0.16         | 3.28           | -1.25           | 0.09         | 3.32           | -1.23           |
| 2.30         | 1.14           | -0.43           | 0.14         | 3.27           | -1.21           |
| 2.12         | 1.32           | -0.50           | 4.41         | 1.00           | 0.37            |
| 1.29         | 2.15           | -0.82           | 0.46         | 2.95           | -1.09           |
| 1.66         | 1.78           | -0.67           | 1.10         | 2.31           | -0.85           |
| 1.61         | 1.83           | -0.70           | 3.13         | 0.28           | -0.10           |
| 0.35         | 3.09           | -1.17           | 0.65         | 2.76           | -1.02           |
| 1.15         | 2.29           | -0.87           | 0.71         | 2.70           | -1.00           |
| 2.85         | 0.59           | -0.22           | 0.80         | 2.61           | -0.96           |
| 1.70         | 1.74           | -0.66           | 2.47         | 0.94           | -0.35           |
| 8.50         | 5.06           | 1.93            | 4.98         | 1.57           | 0.58            |
| 6.11         | 2.67           | 1.02            | 5.04         | 1.63           | 0.61            |
| 1.99         | 1.45           | -0.55           | 2.16         | 1.25           | -0.46           |
| 2.37         | 1.07           | -0.41           | 1.78         | 1.63           | -0.60           |
| 2.06         | 1.38           | -0.52           | 1.96         | 1.45           | -0.53           |
| 6.07         | 2.63           | 1.00            | 7.37         | 3.96           | 1.47            |
| 4.02         | 0.58           | 0.22            | 2.71         | 0.70           | -0.26           |
| 0.39         | 3.05           | -1.16           | 2.88         | 0.53           | -0.19           |
| 3.92         | 0.48           | 0.18            | 1.98         | 1.43           | -0.53           |
| 3.83         | 0.39           | 0.15            | 3.57         | 0.16           | 0.06            |
| 2.02         | 1.42           | -0.54           | 2.39         | 1.02           | -0.38           |
| 2.14         | 1.30           | -0.49           | 5.91         | 2.50           | 0.93            |
| 2.40         | 1.04           | -0.40           | 3.07         | 0.34           | -0.13           |
| 1.45         | 1.99           | -0.76           | 1.77         | 1.64           | -0.61           |
| 3.14         | 0.30           | -0.11           | 11.29        | 7.88           | 2.92            |
| 8.33         | 4.89           | 1.86            | 7.41         | 4.00           | 1.48            |
| 2.63         | 0.81           | -0.31           | 3.18         | 0.23           | -0.08           |
| 3.85         | 0.41           | 0.16            | 5.98         | 2.57           | 0.95            |
| 1.07         | 2.37           | -0.90           | 0.62         | 2.79           | -1.03           |
| 4.91         | 1.47           | 0.56            | 3.68         | 0.27           | 0.10            |
| 4.21         | 0.77           | 0.30            | 5.80         | 2.39           | 0.89            |
| 0.75         | 2.69           | -1.02           | 2.54         | 0.87           | -0.32           |
| 2.04         | 1.40           | -0.53           | 1.40         | 2.01           | -0.74           |
| 2.42         | 1.02           | -0.39           | 5.13         | 1.72           | 0.64            |
| 4.87         | 1.43           | 0.55            | 7.02         | 3.61           | 1.34            |
| 1.21         | 2.23           | -0.85           | 1.68         | 1.73           | -0.64           |
| 4.57         | 1.13           | 0.43            | 15.34        | 11.93          | 4.42            |
| 3.92         | 0.48           | 0.18            | 4.36         | 0.95           | 0.35            |
| 3.27         | 0.17           | -0.07           | 1.22         | 2.19           | -0.81           |
| 6.55         | 3.11           | 1.19            | 3.73         | 0.32           | 0.12            |
| 3.27         | 0.17           | -0.06           | 0.47         | 2.94           | -1.09           |
| 3.53         | 0.09           | 0.03            | 1.72         | 1.69           | -0.62           |
| 7.40         | 3.96           | 1.51            | 2.62         | 0.79           | -0.29           |
| 1.04         | 2.40           | -0.91           | 0.12         | 3.29           | -1.22           |
| 3.92         | 0.48           | 0.19            | 1.39         | 2.02           | -0.75           |

|              |             |             |              |              |               |
|--------------|-------------|-------------|--------------|--------------|---------------|
| 1.22         | 2.22        | -0.84       | 2.14         | 1.27         | -0.47         |
| 1.33         | 2.11        | -0.80       | 1.76         | 1.65         | -0.61         |
| 1.19         | 2.25        | -0.85       | 0.20         | 3.21         | -1.18         |
| 2.48         | 0.96        | -0.36       | 1.00         | 2.41         | -0.89         |
| 3.19         | 0.25        | -0.09       | 1.23         | 2.18         | -0.81         |
| 1.05         | 2.39        | -0.91       | 3.26         | 0.15         | -0.05         |
| 2.55         | 0.89        | -0.34       | 2.70         | 0.71         | -0.26         |
| 1.43         | 2.01        | -0.76       | 0.99         | 2.42         | -0.89         |
| 3.00         | 0.44        | -0.17       | 2.50         | 0.91         | -0.34         |
| 7.93         | 4.49        | 1.71        | 6.16         | 2.75         | 1.02          |
| 7.90         | 4.46        | 1.70        | 5.16         | 1.75         | 0.65          |
| 0.93         | 2.51        | -0.95       | 1.02         | 2.39         | -0.88         |
| 4.00         | 0.56        | 0.21        | 7.05         | 3.64         | 1.35          |
| 0.08         | 3.36        | -1.28       | 0.67         | 2.74         | -1.01         |
| 1.11         | 2.33        | -0.88       | 2.57         | 0.84         | -0.31         |
| 7.55         | 4.11        | 1.56        | 7.71         | 4.30         | 1.59          |
| 8.07         | 4.63        | 1.76        | 4.06         | 0.65         | 0.24          |
| 3.38         | 0.06        | -0.02       | 3.71         | 0.30         | 0.11          |
| 5.47         | 2.03        | 0.77        | 4.38         | 0.97         | 0.36          |
| 7.23         | 3.79        | 1.44        | 8.32         | 4.91         | 1.82          |
| 1.24         | 2.20        | -0.84       | 0.70         | 2.71         | -1.00         |
| 3.09         | 0.35        | -0.13       | 3.58         | 0.17         | 0.06          |
| 1.91         | 1.53        | -0.58       | 2.78         | 0.63         | -0.23         |
| 2.07         | 1.37        | -0.52       | 5.01         | 1.60         | 0.59          |
| 3.20         | 0.24        | -0.09       | 2.31         | 1.10         | -0.41         |
| 2.61         | 0.83        | -0.32       | 3.02         | 0.39         | -0.14         |
| 1.16         | 2.28        | -0.87       | 0.00         | 3.41         | -1.26         |
| 7.07         | 3.63        | 1.38        | 6.63         | 3.22         | 1.19          |
| 4.32         | 0.88        | 0.34        | 2.54         | 0.88         | -0.32         |
| 8.05         | 4.61        | 1.75        | 4.08         | 0.67         | 0.25          |
| 4.04         | 0.60        | 0.23        | 0.93         | 2.48         | -0.92         |
| 4.00         | 0.56        | 0.21        | 3.36         | 0.05         | -0.02         |
| 5.03         | 1.59        | 0.61        | 3.37         | 0.04         | -0.01         |
| 1.14         | 2.30        | -0.87       | 0.48         | 2.93         | -1.08         |
| 3.69         | 0.25        | 0.09        | 4.74         | 1.33         | 0.49          |
| 9.18         | 5.74        | 2.18        | 2.23         | 1.18         | -0.44         |
| 4.34         | 0.90        | 0.34        | 4.41         | 1.00         | 0.37          |
| <b>12.02</b> | <b>8.58</b> | <b>3.27</b> | <b>14.67</b> | <b>11.26</b> | <b>4.17</b> y |
| 1.62         | 1.82        | -0.69       | 1.33         | 2.08         | -0.77         |
| 6.53         | 3.09        | 1.18        | 4.00         | 0.59         | 0.22          |
| 4.29         | 0.85        | 0.32        | 1.87         | 1.54         | -0.57         |
| 5.52         | 2.08        | 0.79        | 1.51         | 1.90         | -0.70         |
| 3.53         | 0.09        | 0.03        | 1.21         | 2.20         | -0.81         |
| 4.07         | 0.63        | 0.24        | 2.42         | 0.99         | -0.36         |
| 2.51         | 0.93        | -0.35       | 3.49         | 0.08         | 0.03          |
| 2.20         | 1.24        | -0.47       | 1.60         | 1.81         | -0.67         |
| 2.53         | 0.91        | -0.35       | 0.30         | 3.11         | -1.15         |

|              |              |             |              |              |               |
|--------------|--------------|-------------|--------------|--------------|---------------|
| 2.30         | 1.14         | -0.43       | 0.58         | 2.83         | -1.05         |
| 7.11         | 3.67         | 1.40        | 0.90         | 2.51         | -0.93         |
| 7.25         | 3.81         | 1.45        | 1.88         | 1.53         | -0.56         |
| 6.05         | 2.61         | 1.00        | 0.37         | 3.04         | -1.12         |
| 2.39         | 1.05         | -0.40       | 0.35         | 3.06         | -1.13         |
| 2.41         | 1.03         | -0.39       | 0.32         | 3.09         | -1.14         |
| 1.17         | 2.27         | -0.86       | 0.38         | 3.03         | -1.12         |
| 2.37         | 1.07         | -0.41       | 2.76         | 0.65         | -0.24         |
| <b>9.73</b>  | <b>6.29</b>  | <b>2.39</b> | <b>10.45</b> | <b>7.04</b>  | <b>2.60</b> y |
| 0.30         | 3.14         | -1.19       | 3.22         | 0.19         | -0.07         |
| 4.13         | 0.69         | 0.26        | 6.65         | 3.24         | 1.20          |
| 1.80         | 1.64         | -0.62       | 4.10         | 0.69         | 0.26          |
| <b>20.01</b> | <b>16.57</b> | <b>6.31</b> | <b>24.74</b> | <b>21.33</b> | <b>7.89</b> y |
| 3.76         | 0.32         | 0.12        | 6.13         | 2.72         | 1.01          |
| 1.49         | 1.95         | -0.74       | 3.60         | 0.19         | 0.07          |
| 3.14         | 0.30         | -0.11       | 5.95         | 2.54         | 0.94          |
| 3.00         | 0.44         | -0.17       | 3.01         | 0.40         | -0.15         |
| 2.12         | 1.32         | -0.50       | 2.08         | 1.33         | -0.49         |
| 1.66         | 1.78         | -0.67       | 2.03         | 1.38         | -0.51         |
| 1.46         | 1.98         | -0.75       | 2.63         | 0.78         | -0.29         |
| 1.10         | 2.34         | -0.89       | 3.95         | 0.54         | 0.20          |
| 4.95         | 1.51         | 0.57        | 2.46         | 0.95         | -0.35         |
| 5.09         | 1.65         | 0.63        | 2.09         | 1.32         | -0.49         |
| 3.10         | 0.34         | -0.13       | 2.55         | 0.87         | -0.32         |
| 8.25         | 4.81         | 1.83        | 9.11         | <b>5.70</b>  | <b>2.11</b>   |
| 3.80         | 0.36         | 0.14        | 1.39         | 2.02         | -0.75         |
| 1.16         | 2.28         | -0.87       | 2.69         | 0.72         | -0.26         |
| <b>4.83</b>  | <b>1.39</b>  | <b>0.53</b> | <b>9.28</b>  | <b>5.87</b>  | <b>2.18</b> y |
| 2.73         | 0.71         | -0.27       | 2.22         | 1.19         | -0.44         |
| <b>9.21</b>  | <b>5.77</b>  | <b>2.20</b> | <b>22.14</b> | <b>18.73</b> | <b>6.93</b> y |
| 0.56         | 2.88         | -1.09       | 2.99         | 0.42         | -0.15         |
| <b>9.42</b>  | <b>5.98</b>  | <b>2.28</b> | <b>4.01</b>  | <b>0.60</b>  | <b>0.22</b> y |
| 5.95         | 2.51         | 0.96        | 8.77         | 5.36         | 1.98          |
| 2.96         | 0.48         | -0.18       | 4.47         | 1.06         | 0.40          |
| 4.55         | 1.11         | 0.42        | 3.14         | 0.27         | -0.10         |
| 10.58        | <b>7.14</b>  | <b>2.72</b> | 5.50         | 2.09         | 0.78          |
| 3.24         | 0.20         | -0.08       | 4.00         | 0.59         | 0.22          |
| 3.17         | 0.27         | -0.10       | 2.65         | 0.76         | -0.28         |
| 6.12         | 2.68         | 1.02        | 7.72         | 4.31         | 1.60          |
| 5.49         | 2.05         | 0.78        | 5.72         | 2.31         | 0.86          |
| 4.03         | 0.59         | 0.23        | 3.91         | 0.50         | 0.19          |
| 1.93         | 1.51         | -0.57       | 4.85         | 1.44         | 0.53          |
| 6.64         | 3.20         | 1.22        | 6.38         | 2.97         | 1.10          |
| 5.18         | 1.74         | 0.66        | 3.78         | 0.37         | 0.14          |
| 6.66         | 3.22         | 1.23        | 3.05         | 0.36         | -0.13         |
| 4.60         | 1.16         | 0.44        | 6.52         | 3.11         | 1.15          |
| 0.76         | 2.68         | -1.02       | 1.78         | 1.63         | -0.60         |

|              |       |       |              |       |        |
|--------------|-------|-------|--------------|-------|--------|
| 2.98         | 0.46  | -0.17 | 4.28         | 0.87  | 0.32   |
| 3.39         | 0.05  | -0.02 | 7.22         | 3.81  | 1.41   |
| 4.21         | 0.77  | 0.29  | 4.52         | 1.11  | 0.41   |
| 1.87         | 1.57  | -0.60 | 0.44         | 2.97  | -1.10  |
| <u>6.20</u>  | 2.76  | 1.05  | <u>14.95</u> | 11.54 | 4.27 y |
| 5.08         | 1.64  | 0.62  | 7.98         | 4.57  | 1.69   |
| 5.91         | 2.47  | 0.94  | 5.70         | 2.29  | 0.85   |
| 1.29         | 2.15  | -0.82 | 2.10         | 1.31  | -0.48  |
| 2.96         | 0.48  | -0.18 | 2.59         | 0.82  | -0.30  |
| 2.95         | 0.49  | -0.19 | 0.99         | 2.42  | -0.89  |
| 2.55         | 0.89  | -0.34 | 5.84         | 2.43  | 0.90   |
| 7.58         | 4.14  | 1.58  | 3.84         | 0.43  | 0.16   |
| 2.07         | 1.37  | -0.52 | 4.13         | 0.72  | 0.27   |
| 1.45         | 1.99  | -0.76 | 1.71         | 1.70  | -0.63  |
| 2.61         | 0.83  | -0.31 | 1.46         | 1.95  | -0.72  |
| 6.85         | 3.41  | 1.30  | 6.52         | 3.11  | 1.15   |
| 6.56         | 3.12  | 1.19  | 7.45         | 4.04  | 1.50   |
| 1.24         | 2.20  | -0.84 | 1.15         | 2.26  | -0.83  |
| 3.26         | 0.18  | -0.07 | 2.32         | 1.09  | -0.40  |
| 3.11         | 0.33  | -0.13 | 1.89         | 1.52  | -0.56  |
| 4.96         | 1.52  | 0.58  | 7.53         | 4.12  | 1.52   |
| 7.90         | 4.46  | 1.70  | 6.63         | 3.22  | 1.19   |
| 3.80         | 0.36  | 0.14  | 2.83         | 0.58  | -0.21  |
| 4.75         | 1.31  | 0.50  | 6.81         | 3.40  | 1.26   |
| 9.12         | 5.68  | 2.16  | 4.23         | 0.82  | 0.31   |
| 5.12         | 1.68  | 0.64  | 2.50         | 0.91  | -0.33  |
| 4.47         | 1.03  | 0.39  | 2.59         | 0.82  | -0.30  |
| 7.99         | 4.55  | 1.73  | 6.59         | 3.18  | 1.18   |
| 2.57         | 0.87  | -0.33 | 1.02         | 2.39  | -0.88  |
| 1.45         | 1.99  | -0.76 | 0.96         | 2.45  | -0.90  |
| 4.08         | 0.64  | 0.25  | 1.16         | 2.25  | -0.83  |
| 5.43         | 1.99  | 0.76  | 1.28         | 2.13  | -0.79  |
| 2.19         | 1.25  | -0.47 | 3.64         | 0.23  | 0.09   |
| 2.72         | 0.72  | -0.27 | 0.49         | 2.92  | -1.08  |
| 4.04         | 0.60  | 0.23  | 2.95         | 0.46  | -0.17  |
| 2.15         | 1.29  | -0.49 | 1.75         | 1.66  | -0.61  |
| <u>18.70</u> | 15.26 | 5.81  | <u>17.28</u> | 13.87 | 5.13 y |
| 3.90         | 0.46  | 0.18  | 4.72         | 1.31  | 0.49   |
| 2.52         | 0.92  | -0.35 | 1.10         | 2.31  | -0.85  |
| <u>14.45</u> | 11.01 | 4.19  | <u>11.91</u> | 8.50  | 3.15 y |
| 7.46         | 4.02  | 1.53  | 2.76         | 0.65  | -0.24  |
| 6.14         | 2.70  | 1.03  | 5.38         | 1.97  | 0.73   |
| <u>17.42</u> | 13.98 | 5.32  | <u>19.09</u> | 15.68 | 5.80 y |
| 8.90         | 5.46  | 2.08  | 8.72         | 5.31  | 1.97   |
| 4.59         | 1.15  | 0.44  | 5.28         | 1.87  | 0.69   |
| 3.06         | 0.38  | -0.15 | 1.84         | 1.57  | -0.58  |
| 5.72         | 2.28  | 0.87  | 4.30         | 0.89  | 0.33   |

|              |              |       |              |              |       |         |
|--------------|--------------|-------|--------------|--------------|-------|---------|
| 0.76         | 2.68         | -1.02 | 0.19         | 3.22         | -1.19 |         |
| 8.04         | 4.60         | 1.75  | 5.39         | 1.98         | 0.73  |         |
| 0.94         | 2.50         | -0.95 | 2.16         | 1.26         | -0.46 |         |
| 1.06         | 2.38         | -0.90 | 1.71         | 1.70         | -0.63 |         |
| 5.08         | 1.64         | 0.62  | 2.53         | 0.88         | -0.32 |         |
| 2.21         | 1.23         | -0.47 | 2.00         | 1.41         | -0.52 |         |
| <b>9.02</b>  | <b>5.58</b>  | 2.12  | <b>11.46</b> | <b>8.05</b>  | 2.98  | y       |
| 4.26         | 0.82         | 0.31  | 3.96         | 0.55         | 0.21  |         |
| 1.38         | 2.06         | -0.78 | 0.54         | 2.87         | -1.06 |         |
| 0.90         | 2.54         | -0.96 | 0.19         | 3.22         | -1.19 |         |
| 6.30         | 2.86         | 1.09  | 1.77         | 1.64         | -0.61 |         |
| 3.81         | 0.37         | 0.14  | 0.71         | 2.70         | -1.00 |         |
| 4.76         | 1.32         | 0.50  | 2.80         | 0.61         | -0.22 |         |
| 9.09         | <b>5.65</b>  | 2.15  | 17.15        | <b>13.74</b> | 5.08  | x art.b |
| 3.73         | 0.29         | 0.11  | 2.80         | 0.61         | -0.22 |         |
| 1.99         | 1.45         | -0.55 | 4.48         | 1.07         | 0.40  |         |
| 3.24         | 0.20         | -0.08 | 7.29         | 3.88         | 1.44  |         |
| 6.40         | 2.96         | 1.13  | 5.83         | 2.42         | 0.90  |         |
| 3.00         | 0.44         | -0.16 | 7.85         | 4.44         | 1.64  |         |
| 4.35         | 0.91         | 0.35  | 6.74         | 3.33         | 1.23  |         |
| 3.70         | 0.26         | 0.10  | 3.03         | 0.38         | -0.14 |         |
| 6.18         | 2.74         | 1.04  | 3.78         | 0.37         | 0.14  |         |
| 2.45         | 0.99         | -0.38 | 4.61         | 1.20         | 0.45  |         |
| 7.08         | 3.64         | 1.38  | 10.25        | <b>6.84</b>  | 2.53  |         |
| 5.09         | 1.65         | 0.63  | 6.15         | 2.74         | 1.01  |         |
| 6.54         | 3.10         | 1.18  | 8.12         | 4.71         | 1.74  |         |
| 2.53         | 0.91         | -0.34 | 2.78         | 0.63         | -0.23 |         |
| 5.56         | 2.12         | 0.81  | 6.32         | 2.91         | 1.08  |         |
| 4.70         | 1.26         | 0.48  | 4.71         | 1.30         | 0.48  |         |
| <b>10.65</b> | <b>7.21</b>  | 2.74  | <b>9.22</b>  | <b>5.81</b>  | 2.15  | y       |
| 6.15         | 2.71         | 1.03  | 9.61         | <b>6.20</b>  | 2.29  |         |
| 5.89         | 2.45         | 0.93  | 8.38         | 4.97         | 1.84  |         |
| 10.77        | <b>7.33</b>  | 2.79  | 3.86         | 0.45         | 0.17  |         |
| 5.19         | 1.75         | 0.67  | 2.76         | 0.65         | -0.24 |         |
| 7.14         | 3.70         | 1.41  | 8.12         | 4.71         | 1.75  |         |
| 7.58         | 4.14         | 1.57  | 3.72         | 0.31         | 0.12  |         |
| <b>18.84</b> | <b>15.40</b> | 5.86  | <b>18.94</b> | <b>15.53</b> | 5.75  | y       |
| 3.21         | 0.23         | -0.09 | 3.01         | 0.40         | -0.15 |         |
| <b>13.33</b> | <b>9.89</b>  | 3.76  | <b>8.75</b>  | 5.34         | 1.98  | y       |
| 2.20         | 1.24         | -0.47 | 1.72         | 1.69         | -0.62 |         |
| 4.50         | 1.06         | 0.41  | 3.40         | 0.01         | 0.00  |         |
| 4.82         | 1.38         | 0.53  | 1.54         | 1.87         | -0.69 |         |
| 5.03         | 1.59         | 0.61  | 3.30         | 0.11         | -0.04 |         |
| 2.54         | 0.90         | -0.34 | 1.13         | 2.28         | -0.84 |         |
| 2.89         | 0.55         | -0.21 | 3.82         | 0.41         | 0.15  |         |
| 0.67         | 2.77         | -1.05 | 0.61         | 2.80         | -1.03 |         |
| 5.91         | 2.47         | 0.94  | 2.99         | 0.42         | -0.15 |         |



|              |              |       |              |              |        |
|--------------|--------------|-------|--------------|--------------|--------|
| 2.25         | 1.19         | -0.45 | 5.72         | 2.31         | 0.86   |
| 6.89         | 3.45         | 1.31  | 8.97         | 5.56         | 2.06   |
| 8.41         | 4.97         | 1.89  | 6.82         | 3.41         | 1.26   |
| 4.62         | 1.18         | 0.45  | 4.20         | 0.79         | 0.30   |
| 5.07         | 1.63         | 0.62  | 9.52         | 6.11         | 2.26   |
| 5.26         | 1.82         | 0.69  | 2.92         | 0.49         | -0.18  |
| <u>16.30</u> | <u>12.86</u> | 4.89  | <u>13.49</u> | <u>10.08</u> | 3.73 y |
| 5.78         | 2.34         | 0.89  | 0.75         | 2.66         | -0.98  |
| 2.38         | 1.06         | -0.40 | 6.99         | 3.58         | 1.33   |
| <u>16.82</u> | <u>13.38</u> | 5.09  | <u>20.60</u> | <u>17.19</u> | 6.36 y |
| 8.16         | 4.72         | 1.80  | 8.91         | 5.50         | 2.04   |
| 5.52         | 2.08         | 0.79  | 4.72         | 1.31         | 0.48   |
| <u>10.39</u> | <u>6.95</u>  | 2.65  | <u>13.36</u> | <u>9.95</u>  | 3.68 y |
| 11.99        | 8.55         | 3.25  | 6.21         | 2.80         | 1.04   |
| 5.29         | 1.85         | 0.70  | 5.83         | 2.42         | 0.90   |
| <u>14.62</u> | <u>11.18</u> | 4.26  | <u>7.85</u>  | 4.44         | 1.65 y |
| 3.84         | 0.40         | 0.15  | 4.39         | 0.98         | 0.36   |
| 6.45         | 3.01         | 1.15  | 3.99         | 0.58         | 0.22   |
| 2.66         | 0.78         | -0.30 | 4.16         | 0.75         | 0.28   |
| 4.25         | 0.81         | 0.31  | 4.71         | 1.30         | 0.48   |
| 3.27         | 0.17         | -0.06 | 2.58         | 0.83         | -0.31  |
| 3.49         | 0.05         | 0.02  | 3.34         | 0.07         | -0.03  |
| 3.81         | 0.37         | 0.14  | 3.63         | 0.22         | 0.08   |
| 7.67         | 4.23         | 1.61  | 3.03         | 0.38         | -0.14  |
| 5.31         | 1.87         | 0.71  | 5.25         | 1.84         | 0.68   |
| 2.53         | 0.91         | -0.34 | 2.48         | 0.93         | -0.34  |
| 0.29         | 3.15         | -1.20 | 1.91         | 1.50         | -0.55  |
| 2.63         | 0.81         | -0.31 | 3.69         | 0.28         | 0.11   |
| <u>2.91</u>  | 0.53         | -0.20 | <u>9.45</u>  | 6.04         | 2.24   |
| 2.02         | 1.42         | -0.54 | 8.47         | 5.06         | 1.88   |
| <u>7.20</u>  | <u>3.76</u>  | 1.43  | <u>11.51</u> | <u>8.10</u>  | 3.00 y |
| 1.38         | 2.06         | -0.78 | 6.69         | 3.28         | 1.21   |
| 3.21         | 0.23         | -0.09 | 8.84         | 5.43         | 2.01   |
| 11.02        | 7.58         | 2.89  | 8.79         | 5.38         | 1.99   |
| 6.49         | 3.05         | 1.16  | 9.26         | 5.85         | 2.17   |
| 1.17         | 2.27         | -0.86 | 3.41         | 0.00         | 0.00   |
| 1.26         | 2.18         | -0.83 | 2.83         | 0.58         | -0.21  |
| 4.02         | 0.58         | 0.22  | 8.05         | 4.64         | 1.72   |
| <u>5.52</u>  | 2.08         | 0.79  | <u>10.71</u> | 7.30         | 2.70   |
| <u>7.09</u>  | <u>3.65</u>  | 1.39  | <u>12.42</u> | <u>9.01</u>  | 3.33 y |
| 1.85         | 1.59         | -0.60 | 13.21        | 9.80         | 3.63   |
| 1.59         | 1.85         | -0.70 | 5.27         | 1.86         | 0.69   |
| 3.36         | 0.08         | -0.03 | 4.66         | 1.25         | 0.47   |
| 7.40         | 3.96         | 1.51  | 11.54        | 8.13         | 3.01   |
| 0.47         | 2.97         | -1.13 | 1.82         | 1.59         | -0.59  |
| 0.82         | 2.62         | -1.00 | 0.82         | 2.59         | -0.96  |
| 3.88         | 0.44         | 0.17  | 13.74        | 10.33        | 3.82   |

|      |       |        |          |          |          |       |
|------|-------|--------|----------|----------|----------|-------|
| 2.22 | 1.22  | -0.46  | 5.03     | 1.62     | 0.60     |       |
| 2.41 | 1.03  | -0.39  | 5.42     | 2.01     | 0.75     |       |
| 6.99 | 3.55  | 1.35   | 17.39    | 13.98    | 5.17     |       |
| 1.28 | 2.16  | -0.82  | 4.73     | 1.32     | 0.49     |       |
| 1.38 | 2.06  | -0.78  | 2.52     | 0.89     | -0.33    |       |
| 4.32 | 0.88  | 0.33   | 5.05     | 1.64     | 0.61     |       |
| 0.81 | 2.63  | -1.00  | 2.83     | 0.58     | -0.21    |       |
| 0.86 | 2.58  | -0.98  | 3.09     | 0.32     | -0.12    |       |
| 0.79 | 2.65  | -1.01  | 1.48     | 1.93     | -0.71    |       |
| 0.80 | 2.64  | -1.00  | 1.44     | 1.97     | -0.73    |       |
| 3.07 | 0.37  | -0.14  | 9.40     | 5.99     | 2.22     |       |
| 1.73 | 1.71  | -0.65  | 9.05     | 5.64     | 2.09     |       |
| 0.53 | 2.91  | -1.11  | 2.85     | 0.56     | -0.21    |       |
| 1.69 | 1.75  | -0.66  | 1.21     | 2.20     | -0.81    |       |
| 0.99 | 2.45  | -0.93  | 5.93     | 2.52     | 0.93     |       |
| 2.66 | 0.78  | -0.29  | 2.90     | 0.51     | -0.19    |       |
| 0.97 | 2.47  | -0.94  | 2.83     | 0.58     | -0.21    |       |
| 2.06 | 1.38  | -0.52  | 5.60     | 2.19     | 0.81     |       |
| 0.68 | 2.76  | -1.05  | 2.46     | 0.95     | -0.35    |       |
| 1.02 | 2.42  | -0.92  | 0.28     | 3.13     | -1.16    |       |
| 5.57 | 2.13  | 0.81   | 8.27     | 4.86     | 1.80     |       |
| 1.30 | 2.14  | -0.82  | 2.44     | 0.97     | -0.36    |       |
| 6.82 | 3.38  | 1.29   | 5.47     | 2.06     | 0.77     |       |
| 2.57 | 0.87  | -0.33  | 3.40     | 0.01     | 0.00     |       |
| 5.30 | 1.86  | 0.71   | 4.83     | 1.42     | 0.53     |       |
| 6.28 | 2.84  | 1.08   | 1.14     | 2.27     | -0.84    |       |
| 2.34 | 1.10  | -0.42  | 1.50     | 1.91     | -0.71    |       |
| 3.51 | 0.07  | 0.03   | 2.69     | 0.72     | -0.27    |       |
| 2.19 | 1.25  | -0.48  | 1.96     | 1.45     | -0.53    |       |
| 1.09 | 2.35  | -0.89  | 1.72     | 1.69     | -0.62    |       |
| 2.07 | 1.37  | -0.52  | 3.28     | 0.13     | -0.04    |       |
| 7.57 | 4.13  | 1.57   | 8.44     | 5.03     | 1.86     |       |
| 4.14 | 0.70  | 0.27   | 2.71     | 0.70     | -0.26    |       |
| 1.60 | 1.84  | -0.70  | 5.82     | 2.41     | 0.89     |       |
| 2.82 | 0.62  | -0.23  | 7.74     | 4.33     | 1.60     |       |
| 3.19 | 0.25  | -0.09  | 3.01     | 0.40     | -0.15    |       |
| 0.40 | 3.04  | -1.16  | 3.41     | 0.00     | 0.00     |       |
| 0.65 | 2.79  | -1.06  | 5.16     | 1.75     | 0.65     |       |
| 6.15 | 2.71  | 1.03   | 2.50     | 0.91     | -0.33    |       |
| 3.44 | 1.78  |        | 3.41     | 1.83     |          |       |
|      | 5.33  |        |          | 5.48     |          |       |
|      | 2.63  |        |          | 2.70     |          |       |
|      |       |        | <b>A</b> | <b>B</b> | <b>C</b> |       |
|      | 32.22 | 3psSD  |          | 5.69     | 9.60     | 20.94 |
|      | 21.16 | 3ngSD  |          | 2.69     | 5.79     | 2.05  |
|      |       | SumSD  |          | 8.38     | 15.39    | 22.99 |
|      | 19.32 | DiffMn |          | 33.47    | 21.99    | 23.35 |

|       |           |      |      |      |
|-------|-----------|------|------|------|
| 24.23 | SmovrDiff | 0.25 | 0.70 | 0.98 |
| 6.98  | 1minus    | 0.75 | 0.30 | 0.02 |
| 1.82  |           |      |      |      |
| 0.92  |           |      |      |      |
| 0.26  |           |      |      |      |
| 0.52  |           |      |      |      |
| 0.88  |           |      |      |      |
| 0.68  |           |      |      |      |
| 8.14  |           |      |      |      |
| 5.13  |           |      |      |      |
| 3.67  |           |      |      |      |
| 0.83  |           |      |      |      |
| 3.13  |           |      |      |      |
| 17.21 |           |      |      |      |
| 24.09 |           |      |      |      |

|          |     |                          | <u>% inf</u>      | <u>abs dev</u> | <u>robust Z</u> |       |
|----------|-----|--------------------------|-------------------|----------------|-----------------|-------|
| 50013.00 | A02 | M-005148- primase, pol   | 5558.00 PRIM2A    | 0.86           | 2.89            | -0.97 |
| 50013.00 | A04 | M-017750- protein phos   | 151987.00 PPP4R2  | 1.88           | 1.87            | -0.62 |
| 50013.00 | A05 | M-008945- FK506 bindin   | 2286.00 FKBP2     | 1.26           | 2.49            | -0.83 |
| 50013.00 | A06 | M-024184- protein phos   | 55370.00 PPP4R1L  | 2.76           | 0.99            | -0.33 |
| 50013.00 | A07 | M-006410- FK506 bindin   | 2288.00 FKBP4     | 0.91           | 2.84            | -0.95 |
| 50013.00 | A08 | M-009869- protein phos   | 5534.00 PPP3R1    | 0.83           | 2.92            | -0.98 |
| 50013.00 | A09 | M-004224- FK506 bindin   | 2289.00 FKBP5     | 3.36           | 0.39            | -0.13 |
| 50013.00 | A10 | M-021914- protein phos   | 90673.00 PPP1R3E  | 5.45           | 1.70            | 0.57  |
| 50013.00 | A11 | M-009426- FK506 bindin   | 8468.00 FKBP6     | 2.29           | 1.46            | -0.49 |
| 50013.00 | A12 | M-015361- protein phos   | 5504.00 PPP1R2    | 0.35           | 3.40            | -1.13 |
| 50013.00 | A13 | M-019253- FK506 bindin   | 63943.00 FKBPL    | 1.39           | 2.36            | -0.79 |
| 50013.00 | A14 | M-017092- protein phos   | 5502.00 PPP1R1A   | 3.71           | 0.04            | -0.01 |
| 50013.00 | A15 | M-018183- transmembr     | 84866.00 TMEM25   | 2.69           | 1.06            | -0.35 |
| 50013.00 | A16 | M-015013- protein phos   | 84919.00 PPP1R15B | 3.42           | 0.33            | -0.11 |
| 50013.00 | A17 | M-013361- tetratricopep  | 54902.00 TTC19    | 1.20           | 2.55            | -0.85 |
| 50013.00 | A18 | M-004442- protein phos   | 23645.00 PPP1R15A | 3.75           | 0.00            | 0.00  |
| 50013.00 | A19 | M-005084- X-ray repair c | 2547.00 XRCC6     | 2.81           | 0.94            | -0.31 |
| 50013.00 | A20 | M-015206- protein phos   | 54866.00 PPP1R14D | 1.68           | 2.07            | -0.69 |
| 50013.00 | A21 | M-011664- glycyl-tRNA s  | 2617.00 GARS      | 3.47           | 0.28            | -0.09 |
| 50013.00 | A23 | M-005153- guanylate bir  | 2633.00 GBP1      | 0.55           | 3.20            | -1.07 |
| 50013.00 | B02 | M-009240- nitric oxide s | 4843.00 NOS2A     | 1.60           | 2.15            | -0.72 |
| 50013.00 | B04 | M-019069- NADH dehyd     | 4719.00 NDUFS1    | 3.16           | 0.59            | -0.20 |
| 50013.00 | B05 | M-006007- protein C (in  | 5624.00 PROC      | 1.08           | 2.67            | -0.89 |
| 50013.00 | B06 | M-009958- similar to nei | 4687.00 LOC4687   | 1.25           | 2.50            | -0.84 |
| 50013.00 | B07 | M-010099- protein Z, vit | 8858.00 PROZ      | 6.97           | 3.22            | 1.07  |
| 50013.00 | B08 | M-008970- lipoprotein li | 4023.00 LPL       | 2.11           | 1.64            | -0.55 |
| 50013.00 | B09 | M-006008- protease, ser  | 5644.00 PRSS1     | 1.85           | 1.90            | -0.63 |
| 50013.00 | B10 | M-008743- lipase, hepat  | 3990.00 LIPC      | 1.44           | 2.31            | -0.77 |
| 50013.00 | B11 | M-006009- HtrA serine p  | 5654.00 HTRA1     | 4.04           | 0.29            | 0.10  |
| 50013.00 | B12 | M-006280- ATPase, Ca++   | 9914.00 ATP2C2    | 3.43           | 0.32            | -0.11 |
| 50013.00 | B13 | M-006012- protease, ser  | 5645.00 PRSS2     | 1.16           | 2.59            | -0.87 |
| 50013.00 | B14 | M-008139- hydroxysterc   | 3295.00 HSD17B4   | 6.61           | 2.86            | 0.95  |
| 50013.00 | B15 | M-006014- HtrA serine p  | 27429.00 HTRA2    | 2.11           | 1.64            | -0.55 |
| 50013.00 | B16 | M-008601- ATPase type    | 23400.00 ATP13A2  | 3.09           | 0.66            | -0.22 |
| 50013.00 | B17 | M-010123- proteasome     | 5682.00 PSMA1     | 5.31           | 1.56            | 0.52  |
| 50013.00 | B18 | M-012099- GTPase activ   | 10146.00 G3BP1    | 8.42           | 4.67            | 1.56  |
| 50013.00 | B19 | M-012349- pyrroline-5-c  | 5831.00 PYCR1     | 2.17           | 1.58            | -0.53 |
| 50013.00 | B20 | M-008376- dihydropyrim   | 1806.00 DPYD      | 1.48           | 2.27            | -0.76 |
| 50013.00 | B21 | M-004667- RAB27A, mer    | 5873.00 RAB27A    | 4.09           | 0.34            | 0.11  |
| 50013.00 | B23 | M-004228- RAB27B, mer    | 5874.00 RAB27B    | 5.39           | 1.64            | 0.55  |
| 50013.00 | C02 | M-014682- protein phos   | 81706.00 PPP1R14C | 3.03           | 0.72            | -0.24 |
| 50013.00 | C04 | M-026574- protein phos   | 26472.00 PPP1R14B | 6.37           | 2.62            | 0.88  |
| 50013.00 | C05 | M-011867- guanylate bir  | 2634.00 GBP2      | 2.37           | 1.38            | -0.46 |
| 50013.00 | C06 | M-021385- protein phos   | 94274.00 PPP1R14A | 5.50           | 1.75            | 0.58  |
| 50013.00 | C07 | M-016144- G kinase ancl  | 80318.00 GKAP1    | 2.83           | 0.92            | -0.31 |
| 50013.00 | C08 | M-010492- protein phos   | 23368.00 PPP1R13B | 6.65           | 2.90            | 0.97  |

|              |                          |          |          |       |      |       |
|--------------|--------------------------|----------|----------|-------|------|-------|
| 50013.00 C09 | M-009843- glycerol-3-ph  | 2820.00  | GPD2     | 8.00  | 4.25 | 1.42  |
| 50013.00 C10 | M-013775- protein phos   | 54776.00 | PPP1R12C | 4.04  | 0.29 | 0.10  |
| 50013.00 C11 | M-009586- glutathione s  | 2937.00  | GSS      | 3.84  | 0.09 | 0.03  |
| 50013.00 C12 | M-011340- protein phos   | 4659.00  | PPP1R12A | 1.16  | 2.59 | -0.86 |
| 50013.00 C13 | M-019856- hepatitis A vi | 26762.00 | HAVCR1   | 0.73  | 3.02 | -1.01 |
| 50013.00 C14 | M-006827- protein phos   | 5501.00  | PPP1CC   | 7.89  | 4.14 | 1.38  |
| 50013.00 C15 | M-004258- histone deac   | 79885.00 | HDAC11   | 4.73  | 0.98 | 0.33  |
| 50013.00 C16 | M-009613- porcupine hc   | 64840.00 | PORCN    | 5.40  | 1.65 | 0.55  |
| 50013.00 C17 | M-003496- histone deac   | 8841.00  | HDAC3    | 2.40  | 1.35 | -0.45 |
| 50013.00 C18 | M-008293- peptidylproly  | 9360.00  | PPIG     | 6.58  | 2.83 | 0.94  |
| 50013.00 C19 | M-003500- histone deac   | 55869.00 | HDAC8    | 10.09 | 6.34 | 2.12  |
| 50013.00 C20 | M-008888- peptidylproly  | 5481.00  | PPID     | 4.19  | 0.44 | 0.14  |
| 50013.00 C21 | M-004142- v-Ha-ras Har   | 3265.00  | HRAS     | 2.80  | 0.95 | -0.32 |
| 50013.00 C23 | M-017609- heat shock 7   | 3312.00  | HSPA8    | 1.99  | 1.76 | -0.59 |
| 50013.00 D02 | M-009509- dihydrolipoa   | 1738.00  | DLD      | 5.18  | 1.43 | 0.48  |
| 50013.00 D04 | M-010506- DEAH (Asp-G    | 1659.00  | DHX8     | 1.63  | 2.12 | -0.71 |
| 50013.00 D05 | M-008582- RAB28, mem     | 9364.00  | RAB28    | 1.66  | 2.09 | -0.70 |
| 50013.00 D06 | M-008282- cytochrome b   | 1545.00  | CYP1B1   | 1.61  | 2.14 | -0.71 |
| 50013.00 D07 | M-008269- RAB30, mem     | 27314.00 | RAB30    | 1.02  | 2.73 | -0.91 |
| 50013.00 D08 | M-008276- cytochrome b   | 1588.00  | CYP19A1  | 1.05  | 2.70 | -0.90 |
| 50013.00 D09 | M-009031- RAB6C, mem     | 84084.00 | RAB6C    | 3.61  | 0.14 | -0.05 |
| 50013.00 D10 | M-011550- copine III     | 8895.00  | CPNE3    | 3.08  | 0.67 | -0.22 |
| 50013.00 D11 | M-013620- RAB, membe     | 11159.00 | RABL2A   | 1.32  | 2.43 | -0.81 |
| 50013.00 D12 | M-009303- ceruloplasm    | 1356.00  | CP       | 3.43  | 0.32 | -0.11 |
| 50013.00 D13 | M-008404- RAB, membe     | 11158.00 | RABL2B   | 1.59  | 2.16 | -0.72 |
| 50013.00 D14 | M-011837- COX11 homc     | 1353.00  | COX11    | 1.92  | 1.83 | -0.61 |
| 50013.00 D15 | M-007741- ras-related C  | 5880.00  | RAC2     | 0.86  | 2.89 | -0.97 |
| 50013.00 D16 | M-020426- ATPase type    | 57130.00 | ATP13A1  | 4.20  | 0.45 | 0.15  |
| 50013.00 D17 | M-003293- RAD1 homol     | 5810.00  | RAD1     | 2.76  | 0.99 | -0.33 |
| 50013.00 D18 | M-006425- cystic fibrosi | 1080.00  | CFTR     | 8.10  | 4.35 | 1.45  |
| 50013.00 D19 | M-005232- RAD50 homc     | 10111.00 | RAD50    | 8.62  | 4.87 | 1.62  |
| 50013.00 D20 | M-008954- copper chapr   | 9973.00  | CCS      | 2.43  | 1.32 | -0.44 |
| 50013.00 D21 | M-010534- RAD51 homc     | 5889.00  | RAD51C   | 7.05  | 3.30 | 1.10  |
| 50013.00 D23 | M-011373- RAD51-like 1   | 5890.00  | RAD51L1  | 3.96  | 0.21 | 0.07  |
| 50013.00 E02 | M-022098- protein tyros  | 8497.00  | PPFIA4   | 1.65  | 2.10 | -0.70 |
| 50013.00 E04 | M-012612- protein tyros  | 8541.00  | PPFIA3   | 3.96  | 0.21 | 0.07  |
| 50013.00 E05 | M-019543- interferon in  | 8519.00  | IFITM1   | 1.68  | 2.07 | -0.69 |
| 50013.00 E06 | M-011485- protein tyros  | 8499.00  | PPFIA2   | 5.71  | 1.96 | 0.65  |
| 50013.00 E07 | M-019657- immunoglob     | 3508.00  | IGHMBP2  | 2.04  | 1.71 | -0.57 |
| 50013.00 E08 | M-011486- protein tyros  | 8500.00  | PPFIA1   | 5.52  | 1.77 | 0.59  |
| 50013.00 E09 | M-010172- inositol(myo   | 3612.00  | IMPA1    | 3.97  | 0.22 | 0.07  |
| 50013.00 E10 | M-006003- phosphoribo    | 5471.00  | PPAT     | 13.54 | 9.79 | 3.27  |
| 50013.00 E11 | M-008348- inositol(myo   | 3613.00  | IMPA2    | 5.38  | 1.63 | 0.54  |
| 50013.00 E12 | M-017891- peter pan ho   | 56342.00 | PPAN     | 4.06  | 0.31 | 0.10  |
| 50013.00 E13 | M-008505- inositol poly  | 3628.00  | INPP1    | 8.89  | 5.14 | 1.72  |
| 50013.00 E14 | M-013134- pyrophospha    | 5464.00  | PPA1     | 1.85  | 1.90 | -0.63 |
| 50013.00 E15 | M-021154- NFKB inhibit   | 28512.00 | NKIRAS1  | 4.49  | 0.74 | 0.25  |

|                     |                                  |                       |              |              |             |
|---------------------|----------------------------------|-----------------------|--------------|--------------|-------------|
| 50013.00 E16        | M-020046- processing of          | 10775.00 POP4         | 2.64         | 1.11         | -0.37       |
| 50013.00 E17        | M-015340- NFKB inhibito          | 28511.00 NKIRAS2      | 4.13         | 0.38         | 0.13        |
| <b>50013.00 E18</b> | <b>M-009807- polymerase (</b>    | <b>11044.00 POLS</b>  | <b>16.70</b> | <b>12.95</b> | <b>4.32</b> |
| 50013.00 E19        | M-026388- La ribonucleo          | 23185.00 LARP5        | 5.00         | 1.25         | 0.42        |
| 50013.00 E20        | M-011357- polymerase (           | 5436.00 POLR2G        | 3.44         | 0.31         | -0.10       |
| 50013.00 E21        | M-004630- microtubule            | 23227.00 MAST4        | 2.16         | 1.59         | -0.53       |
| 50013.00 E23        | M-004049- receptor inte          | 25778.00 RIPK5        | 5.32         | 1.57         | 0.52        |
| 50013.00 F02        | M-024177- ATPase, Clas:          | 10079.00 ATP9A        | 7.50         | 3.75         | 1.25        |
| 50013.00 F04        | M-019995- ATPase, Clas:          | 5205.00 ATP8B1        | 9.36         | 5.61         | 1.87        |
| 50013.00 F05        | M-017467- RAD51-like 3           | 5892.00 RAD51L3       | 6.71         | 2.96         | 0.99        |
| 50013.00 F06        | M-010164- ATPase, amir           | 51761.00 ATP8A2       | 2.88         | 0.87         | -0.29       |
| 50013.00 F07        | M-010572- RAD54 homoc            | 25788.00 RAD54B       | 7.50         | 3.75         | 1.25        |
| 50013.00 F08        | M-008166- ATPase, amir           | 10396.00 ATP8A1       | 3.42         | 0.33         | -0.11       |
| 50013.00 F09        | M-012548- recombinatio           | 5897.00 RAG2          | 3.81         | 0.06         | 0.02        |
| 50013.00 F10        | M-019281- ATPase, Cu+            | 540.00 ATP7B          | 6.86         | 3.11         | 1.04        |
| <b>50013.00 F11</b> | <b>M-004746- RAN binding</b>     | <b>5903.00 RANBP2</b> | <b>10.10</b> | <b>6.35</b>  | <b>2.12</b> |
| 50013.00 F12        | M-019280- ATPase, Cu+            | 538.00 ATP7A          | 3.77         | 0.02         | 0.01        |
| 50013.00 F13        | M-003623- RAP1A, mem             | 5906.00 RAP1A         | 2.49         | 1.26         | -0.42       |
| 50013.00 F14        | M-010930- ATPase, H+ t           | 51606.00 ATP6V1H      | 3.69         | 0.06         | -0.02       |
| 50013.00 F15        | M-010081- RAP2A, mem             | 5911.00 RAP2A         | 0.32         | 3.43         | -1.14       |
| 50013.00 F16        | M-011588- ATPase, H+ t           | 525.00 ATP6V1B1       | 1.17         | 2.58         | -0.86       |
| 50013.00 F17        | M-008073- retinol bindir         | 5949.00 RBP3          | 3.16         | 0.59         | -0.20       |
| 50013.00 F18        | M-006114- ATPase, Ca++           | 489.00 ATP2A3         | 0.62         | 3.13         | -1.05       |
| 50013.00 F19        | M-010559- RecQ proteir           | 9401.00 RECQL4        | 0.61         | 3.14         | -1.05       |
| 50013.00 F20        | M-006113- ATPase, Ca++           | 487.00 ATP2A1         | 0.71         | 3.04         | -1.01       |
| 50013.00 F21        | M-019338- RecQ proteir           | 9400.00 RECQL5        | 7.27         | 3.52         | 1.17        |
| 50013.00 F23        | M-011763- UPF1 regulat           | 5976.00 UPF1          | 7.64         | 3.89         | 1.30        |
| 50013.00 G02        | M-011187- polymerase (           | 5431.00 POLR2B        | 4.65         | 0.90         | 0.30        |
| 50013.00 G04        | M-011186- polymerase (           | 5430.00 POLR2A        | 1.50         | 2.25         | -0.75       |
| 50013.00 G05        | M-005069- v-Ki-ras2 Kirs         | 3845.00 KRAS          | 3.25         | 0.50         | -0.17       |
| 50013.00 G06        | M-008746- polymerase (           | 27343.00 POLL         | 1.90         | 1.85         | -0.62       |
| <b>50013.00 G07</b> | <b>M-003570- kinase suppr</b>    | <b>8844.00 KSR1</b>   | <b>10.19</b> | <b>6.44</b>  | <b>2.15</b> |
| 50013.00 G08        | M-006454- polymerase (           | 5429.00 POLH          | 4.93         | 1.18         | 0.39        |
| 50013.00 G09        | M-005923- leucine amin           | 51056.00 LAP3         | 5.90         | 2.15         | 0.72        |
| 50013.00 G10        | M-012649- polymerase (           | 5428.00 POLG          | 3.31         | 0.44         | -0.15       |
| 50013.00 G11        | M-009623- lecithin-chok          | 3931.00 LCAT          | 4.87         | 1.12         | 0.37        |
| 50013.00 G12        | M-020132- polymerase (           | 5426.00 POLE          | 7.86         | 4.11         | 1.37        |
| 50013.00 G13        | M-010582- likely ortholc         | 79132.00 LGP2         | 4.70         | 0.95         | 0.32        |
| 50013.00 G14        | M-019687- polymerase (           | 5424.00 POLD1         | 3.32         | 0.43         | -0.14       |
| <b>50013.00 G15</b> | <b>M-011076- ligase I, DNA,</b>  | <b>3978.00 LIG1</b>   | <b>8.84</b>  | <b>5.09</b>  | <b>1.70</b> |
| <b>50013.00 G16</b> | <b>M-020856- polymerase (</b>    | <b>5422.00 POLA1</b>  | <b>8.82</b>  | <b>5.07</b>  | <b>1.69</b> |
| <b>50013.00 G17</b> | <b>M-009060- lipase, gastrin</b> | <b>8513.00 LIPF</b>   | <b>23.76</b> | <b>20.01</b> | <b>6.68</b> |
| 50013.00 G18        | M-017120- pyridoxal (py          | 57026.00 PDXP         | 7.43         | 3.68         | 1.23        |
| <b>50013.00 G19</b> | <b>M-009601- lipase, endot</b>   | <b>9388.00 LIPG</b>   | <b>15.11</b> | <b>11.36</b> | <b>3.79</b> |
| 50013.00 G20        | M-006001- plasminogen            | 5340.00 PLG           | 1.78         | 1.97         | -0.66       |
| 50013.00 G21        | M-005926- leucyl/cystin          | 4012.00 LNPEP         | 5.76         | 2.01         | 0.67        |
| 50013.00 G23        | M-009810- lysyl oxidase          | 4015.00 LOX           | 2.57         | 1.18         | -0.39       |

|              |                          |                  |       |      |       |
|--------------|--------------------------|------------------|-------|------|-------|
| 50013.00 H02 | M-006112- ATPase, Na+    | 477.00 ATP1A2    | 11.96 | 8.21 | 2.74  |
| 50013.00 H04 | M-023660- ATPase, Clas   | 23200.00 ATP11B  | 6.49  | 2.74 | 0.91  |
| 50013.00 H05 | M-008234- REV1 homolo    | 51455.00 REV1    | 2.48  | 1.27 | -0.43 |
| 50013.00 H06 | M-008291- aldehyde oxi   | 316.00 AOX1      | 8.50  | 4.75 | 1.58  |
| 50013.00 H07 | M-006302- REV3-like, ca  | 5980.00 REV3L    | 6.63  | 2.88 | 0.96  |
| 50013.00 H08 | M-009026- arachidonate   | 247.00 ALOX15B   | 3.91  | 0.16 | 0.05  |
| 50013.00 H09 | M-008929- Rho family G   | 27289.00 RND1    | 5.56  | 1.81 | 0.61  |
| 50013.00 H10 | M-009025- arachidonate   | 242.00 ALOX12B   | 3.53  | 0.22 | -0.07 |
| 50013.00 H11 | M-020480- Rho-related l  | 22836.00 RHOBTB3 | 3.70  | 0.05 | -0.02 |
| 50013.00 H12 | M-008503- aldo-keto rec  | 1646.00 AKR1C2   | 11.89 | 8.14 | 2.72  |
| 50013.00 H13 | M-008510- Ras-like with  | 6014.00 RIT2     | 9.11  | 5.36 | 1.79  |
| 50013.00 H14 | M-009151- aldo-keto rec  | 1645.00 AKR1C1   | 3.40  | 0.35 | -0.12 |
| 50013.00 H15 | M-009282- ribonuclease   | 8635.00 RNASET2  | 6.70  | 2.95 | 0.99  |
| 50013.00 H16 | M-008131- ATPase type    | 79572.00 ATP13A3 | 7.01  | 3.26 | 1.09  |
| 50013.00 H17 | M-019525- RNA (guanin    | 8731.00 RNMT     | 12.63 | 8.88 | 2.96  |
| 50013.00 H18 | M-008115- alcohol dehy   | 131.00 ADH7      | 0.70  | 3.05 | -1.02 |
| 50013.00 H19 | M-006031- arginyl amin   | 6051.00 RNPEP    | 8.23  | 4.48 | 1.49  |
| 50013.00 H20 | M-008939- alcohol dehy   | 130.00 ADH6      | 8.21  | 4.46 | 1.49  |
| 50013.00 H21 | M-007793- Ras-related a  | 6236.00 RRAD     | 5.32  | 1.57 | 0.52  |
| 50013.00 H23 | M-010352- related RAS \  | 6237.00 RRAS     | 1.27  | 2.48 | -0.83 |
| 50013.00 I02 | M-004903- phospholipa    | 7941.00 PLA2G7   | 0.97  | 2.78 | -0.93 |
| 50013.00 I04 | M-010110- phospholipa    | 5322.00 PLA2G5   | 9.59  | 5.84 | 1.95  |
| 50013.00 I05 | M-009695- leukotriene E  | 22949.00 LTB4DH  | 10.49 | 6.74 | 2.25  |
| 50013.00 I06 | M-009545- phospholipa    | 50487.00 PLA2G3  | 3.05  | 0.70 | -0.24 |
| 50013.00 I07 | M-019661- lactotransfer  | 4057.00 LTF      | 10.36 | 6.61 | 2.21  |
| 50013.00 I08 | M-010283- phospholipa    | 30814.00 PLA2G2E | 1.21  | 2.54 | -0.85 |
| 50013.00 I09 | M-019883- ectonucleosi   | 9583.00 ENTPD4   | 6.17  | 2.42 | 0.81  |
| 50013.00 I10 | M-010281- phospholipa    | 26279.00 PLA2G2D | 10.42 | 6.67 | 2.23  |
| 50013.00 I11 | M-008496- methionine a   | 4143.00 MAT1A    | 1.52  | 2.23 | -0.74 |
| 50013.00 I12 | M-009901- phospholipa    | 5320.00 PLA2G2A  | 5.08  | 1.33 | 0.44  |
| 50013.00 I13 | M-011554- methyl-CpG l   | 8930.00 MBD4     | 3.35  | 0.40 | -0.13 |
| 50013.00 I14 | M-008873- phospholipa    | 5319.00 PLA2G1B  | 0.77  | 2.98 | -1.00 |
| 50013.00 I15 | M-005940- membrane-b     | 51360.00 MBTPS2  | 5.77  | 2.02 | 0.67  |
| 50013.00 I16 | M-003291- protein (pepi  | 5300.00 PIN1     | 4.32  | 0.57 | 0.19  |
| 50013.00 I17 | M-009429- methylcroto    | 56922.00 MCCC1   | 4.56  | 0.81 | 0.27  |
| 50013.00 I18 | M-009518- phosphoglyc    | 26227.00 PHGDH   | 4.08  | 0.33 | 0.11  |
| 50013.00 I19 | M-003273- minichromos    | 4171.00 MCM2     | 7.36  | 3.61 | 1.20  |
| 50013.00 I20 | M-005995- phosphate re   | 5251.00 PHEX     | 5.13  | 1.38 | 0.46  |
| 50013.00 I21 | M-003274- minichromos    | 4172.00 MCM3     | 3.72  | 0.03 | -0.01 |
| 50013.00 I23 | M-003275- minichromos    | 4173.00 MCM4     | 2.13  | 1.62 | -0.54 |
| 50013.00 J02 | M-009924- ATP-binding    | 9429.00 ABCG2    | 2.79  | 0.96 | -0.32 |
| 50013.00 J04 | M-005160- tubulin, gam   | 7283.00 TUBG1    | 1.70  | 2.05 | -0.68 |
| 50013.00 J05 | M-010358- related RAS \  | 22800.00 RRAS2   | 5.30  | 1.55 | 0.52  |
| 50013.00 J06 | M-006844- tubulin, epsil | 51175.00 TUBE1   | 2.82  | 0.93 | -0.31 |
| 50013.00 J07 | M-009557- RAS-like, far  | 10633.00 RASL10A | 5.42  | 1.67 | 0.56  |
| 50013.00 J08 | M-006843- tubulin, delta | 51174.00 TUBD1   | 4.34  | 0.59 | 0.20  |
| 50013.00 J09 | M-008977- RuvB-like 1 (l | 8607.00 RUVBL1   | 11.22 | 7.47 | 2.49  |

|              |                           |                   |       |       |       |
|--------------|---------------------------|-------------------|-------|-------|-------|
| 50013.00 J10 | M-010111- tubulin, beta   | 56604.00 TUBB4Q   | 1.78  | 1.97  | -0.66 |
| 50013.00 J11 | M-012299- RuvB-like 2 (l  | 10856.00 RUVBL2   | 4.24  | 0.49  | 0.16  |
| 50013.00 J12 | M-020099- tubulin, beta   | 10381.00 TUBB3    | 11.82 | 8.07  | 2.69  |
| 50013.00 J13 | M-005061- stearyl-CoA     | 6319.00 SCD       | 3.15  | 0.60  | -0.20 |
| 50013.00 J14 | M-009589- tubulin, beta   | 81027.00 TUBB1    | 1.37  | 2.38  | -0.79 |
| 50013.00 J15 | M-014751- SET domain,     | 83852.00 SETDB2   | 5.37  | 1.62  | 0.54  |
| 50013.00 J16 | M-009279- tubulin, alph.  | 7278.00 TUBA3C    | 4.87  | 1.12  | 0.37  |
| 50013.00 J17 | M-020013- SET domain a    | 6419.00 SETMAR    | 3.90  | 0.15  | 0.05  |
| 50013.00 J18 | M-008779- tubulin, alph.  | 7277.00 TUBA4A    | 3.41  | 0.34  | -0.11 |
| 50013.00 J19 | M-012597- SH3-domain      | 6456.00 SH3GL2    | 5.98  | 2.23  | 0.74  |
| 50013.00 J20 | M-040894- ribosomal pr    | 58988.00 Rps6kb2  | 1.44  | 2.31  | -0.77 |
| 50013.00 J21 | M-021353- split hand/fo   | 7979.00 SHFM1     | 0.96  | 2.79  | -0.93 |
| 50013.00 J23 | M-003540- sirtuin (silent | 23411.00 SIRT1    | 7.38  | 3.63  | 1.21  |
| 50013.00 K02 | M-004902- peroxisomal     | 5190.00 PEX6      | 6.51  | 2.76  | 0.92  |
| 50013.00 K04 | M-003820- phosphodies     | 5152.00 PDE9A     | 5.83  | 2.08  | 0.69  |
| 50013.00 K05 | M-003276- minichromos     | 4174.00 MCM5      | 3.09  | 0.66  | -0.22 |
| 50013.00 K06 | M-007667- phosphodies     | 8654.00 PDE5A     | 10.59 | 6.84  | 2.28  |
| 50013.00 K07 | M-003277- minichromos     | 4175.00 MCM6      | 10.57 | 6.82  | 2.27  |
| 50013.00 K08 | M-007643- phosphodies     | 5137.00 PDE1C     | 5.58  | 1.83  | 0.61  |
| 50013.00 K09 | M-003278- minichromos     | 4176.00 MCM7      | 12.97 | 9.22  | 3.08  |
| 50013.00 K10 | M-007642- phosphodies     | 5153.00 PDE1B     | 3.14  | 0.61  | -0.21 |
| 50013.00 K11 | M-005941- meprin A, alç   | 4224.00 MEP1A     | 4.79  | 1.04  | 0.35  |
| 50013.00 K12 | M-007641- phosphodies     | 5136.00 PDE1A     | 1.03  | 2.72  | -0.91 |
| 50013.00 K13 | M-005949- mitochondria    | 4285.00 MIPEP     | 0.75  | 3.00  | -1.00 |
| 50013.00 K14 | M-010339- chromatin m     | 5119.00 CHMP1A    | 3.24  | 0.51  | -0.17 |
| 50013.00 K15 | M-005951- matrix metal    | 4312.00 MMP1      | 4.44  | 0.69  | 0.23  |
| 50013.00 K16 | M-003289- proliferating   | 5111.00 PCNA      | 5.47  | 1.72  | 0.57  |
| 50013.00 K17 | M-005952- matrix metal    | 4319.00 MMP10     | 7.62  | 3.87  | 1.29  |
| 50013.00 K18 | M-005165- pericentriola   | 5108.00 PCM1      | 1.90  | 1.85  | -0.62 |
| 50013.00 K19 | M-005953- matrix metal    | 4320.00 MMP11     | 4.83  | 1.08  | 0.36  |
| 50013.00 K20 | M-008965- propionyl Co    | 5095.00 PCCA      | 1.22  | 2.53  | -0.85 |
| 50013.00 K21 | M-005954- matrix metal    | 4321.00 MMP12     | 3.11  | 0.65  | -0.22 |
| 50013.00 K23 | M-005955- matrix metal    | 4322.00 MMP13     | 2.85  | 0.90  | -0.30 |
| 50013.00 L02 | M-012005- reelin          | 5649.00 RELN      | 11.44 | 7.69  | 2.57  |
| 50013.00 L04 | M-008969- protein tyros   | 5771.00 PTPN2     | 2.10  | 1.65  | -0.55 |
| 50013.00 L05 | M-004826- sirtuin (silent | 22933.00 SIRT2    | 3.75  | 0.00  | 0.00  |
| 50013.00 L06 | M-011886- septin 4        | 5414.00 SEPT4     | 2.58  | 1.17  | -0.39 |
| 50013.00 L07 | M-013801- SWI/SNF-rela    | 56916.00 SMARCD1  | 13.36 | 9.61  | 3.21  |
| 50013.00 L08 | M-013234- septin 5        | 5413.00 SEPT5     | 7.78  | 4.03  | 1.35  |
| 50013.00 L09 | M-013058- SWI/SNF rela    | 50485.00 SMARCAL1 | 6.58  | 2.83  | 0.94  |
| 50013.00 L10 | M-012184- NEL-like 1 (cl  | 4745.00 NELL1     | 0.41  | 3.34  | -1.11 |
| 50013.00 L11 | M-009784- superoxide d    | 6648.00 SOD2      | 4.46  | 0.71  | 0.24  |
| 50013.00 L12 | M-008981- tubulin, beta   | 84617.00 TUBB6    | 0.71  | 3.04  | -1.01 |
| 50013.00 L13 | M-017294- sperm adhes     | 6677.00 SPAM1     | 10.49 | 6.74  | 2.25  |
| 50013.00 L14 | M-020062- tubulin, alph.  | 10376.00 TUBA1B   | 3.49  | 0.26  | -0.09 |
| 50013.00 L15 | M-010946- spastic paraç   | 51062.00 SPG3A    | 17.95 | 14.20 | 4.74  |
| 50013.00 L16 | M-005763- ADAM metal      | 81792.00 ADAMTS12 | 8.59  | 4.84  | 1.61  |



|                     |                                 |                        |              |              |             |
|---------------------|---------------------------------|------------------------|--------------|--------------|-------------|
| 50013.00 L17        | M-006039- spastic paraç         | 6687.00 SPG7           | 3.26         | 0.49         | -0.16       |
| 50013.00 L18        | M-017387- TAP binding j         | 6892.00 TAPBP          | 0.33         | 3.42         | -1.14       |
| 50013.00 L19        | M-020043- SPO11 meiot           | 23626.00 SPO11         | 3.16         | 0.59         | -0.20       |
| 50013.00 L20        | M-007635- transporter 2         | 6891.00 TAP2           | 8.02         | 4.27         | 1.42        |
| <b>50013.00 L21</b> | <b>M-009738- sulfotransfer</b>  | <b>6783.00 SULT1E1</b> | <b>13.47</b> | <b>9.72</b>  | <b>3.24</b> |
| 50013.00 L23        | M-009602- steroid sulfat        | 412.00 STS             | 3.31         | 0.44         | -0.15       |
| 50013.00 M02        | M-008950- pyruvate carl         | 5091.00 PC             | 1.30         | 2.45         | -0.82       |
| 50013.00 M04        | M-005130- pregnancy-as          | 5069.00 PAPP           | 7.15         | 3.40         | 1.13        |
| 50013.00 M05        | M-004048- matrix metal          | 4327.00 MMP19          | 3.33         | 0.42         | -0.14       |
| 50013.00 M06        | M-003797- pantothenat           | 80025.00 PANK2         | 8.73         | 4.98         | 1.66        |
| 50013.00 M07        | M-005959- matrix metal          | 4313.00 MMP2           | 7.77         | 4.02         | 1.34        |
| 50013.00 M08        | M-008898- phenylalanin          | 5053.00 PAH            | 4.91         | 1.16         | 0.39        |
| <b>50013.00 M09</b> | <b>M-005960- matrix metal</b>   | <b>9313.00 MMP20</b>   | <b>14.33</b> | <b>10.58</b> | <b>3.53</b> |
| <b>50013.00 M10</b> | <b>M-008583- platelet-activ</b> | <b>5051.00 PAFAH2</b>  | <b>19.77</b> | <b>16.02</b> | <b>5.35</b> |
| 50013.00 M11        | M-009245- matrix metal          | 8511.00 MMP23A         | 10.59        | <b>6.84</b>  | <b>2.28</b> |
| <b>50013.00 M12</b> | <b>M-009291- ornithine car</b>  | <b>5009.00 OTC</b>     | <b>11.20</b> | <b>7.45</b>  | <b>2.48</b> |
| 50013.00 M13        | M-005962- matrix metal          | 8510.00 MMP23B         | 11.69        | <b>7.94</b>  | <b>2.65</b> |
| 50013.00 M14        | M-019111- O-linked N-a          | 8473.00 OGT            | 6.42         | 2.67         | 0.89        |
| 50013.00 M15        | M-005964- matrix metal          | 64386.00 MMP25         | 2.76         | 0.99         | -0.33       |
| 50013.00 M16        | M-005147- 8-oxoguanin           | 4968.00 OGG1           | 2.60         | 1.15         | -0.38       |
| 50013.00 M17        | M-005965- matrix metal          | 56547.00 MMP26         | 4.16         | 0.41         | 0.14        |
| 50013.00 M18        | M-019216- ornithine dec         | 4946.00 OAZ1           | 9.66         | 5.91         | 1.97        |
| 50013.00 M19        | M-005967- matrix metal          | 79148.00 MMP28         | 6.87         | 3.12         | 1.04        |
| 50013.00 M20        | M-009767- 2'-5'-oligoad         | 4940.00 OAS3           | 2.70         | 1.05         | -0.35       |
| 50013.00 M21        | M-005968- matrix metal          | 4314.00 MMP3           | 3.06         | 0.69         | -0.23       |
| 50013.00 M23        | M-003782- matrix metal          | 4316.00 MMP7           | 3.86         | 0.11         | 0.04        |
| 50013.00 N02        | M-006235- potassium vc          | 27133.00 KCNH5         | 2.17         | 1.58         | -0.53       |
| 50013.00 N04        | M-006232- potassium vc          | 3756.00 KCNH1          | 8.03         | 4.28         | 1.43        |
| 50013.00 N05        | M-008310- sulfite oxidas        | 6821.00 SUOX           | 3.12         | 0.63         | -0.21       |
| 50013.00 N06        | M-006119- ATPase, Ca++          | 27032.00 ATP2C1        | 5.65         | 1.90         | 0.63        |
| 50013.00 N07        | M-009604- suppressor o          | 6839.00 SUV39H1        | 5.60         | 1.85         | 0.62        |
| 50013.00 N08        | M-005778- ADAM metal            | 11095.00 ADAMTS8       | 1.15         | 2.60         | -0.87       |
| 50013.00 N09        | M-008512- suppressor o          | 79723.00 SUV39H2       | 0.97         | 2.78         | -0.93       |
| 50013.00 N10        | M-009652- tubulin, beta         | 10382.00 TUBB4         | 1.29         | 2.46         | -0.82       |
| 50013.00 N11        | M-019486- synaptojanin          | 8867.00 SYNJ1          | 1.36         | 2.39         | -0.80       |
| 50013.00 N12        | M-008260- tubulin, beta         | 7280.00 TUBB2A         | 4.33         | 0.58         | 0.19        |
| 50013.00 N13        | M-012151- Tar (HIV-1) R         | 6894.00 TARBP1         | 1.72         | 2.03         | -0.68       |
| 50013.00 N14        | M-010325- tubulin, beta         | 203068.00 TUBB         | 8.19         | 4.44         | 1.48        |
| 50013.00 N15        | M-008336- tyrosine amii         | 6898.00 TAT            | 6.08         | 2.33         | 0.78        |
| 50013.00 N16        | M-031724- zinc finger pr        | 84914.00 ZNF587        | 13.47        | <b>9.72</b>  | <b>3.24</b> |
| 50013.00 N17        | M-004496- prostaglandii         | 10728.00 PTGES3        | 9.58         | 5.83         | 1.95        |
| 50013.00 N18        | M-006103- YME1-like 1 (         | 10730.00 YME1L1        | 14.65        | <b>10.90</b> | <b>3.64</b> |
| 50013.00 N19        | M-012377- telomerase-ç          | 7011.00 TEP1           | 3.41         | 0.34         | -0.12       |
| 50013.00 N20        | M-012067- X-ray repair c        | 7517.00 XRCC3          | 4.16         | 0.41         | 0.14        |
| 50013.00 N21        | M-003547- telomerase r          | 7015.00 TERT           | 3.67         | 0.08         | -0.03       |
| 50013.00 N23        | M-004575- transglutami          | 7051.00 TGM1           | 5.04         | 1.29         | 0.43        |
| 50013.00 O02        | M-009768- 2'-5'-oligoad         | 4939.00 OAS2           | 0.99         | 2.76         | -0.92       |

|              |                          |                  |       |      |       |
|--------------|--------------------------|------------------|-------|------|-------|
| 50013.00 O04 | M-011344- 2',5'-oligoad  | 4938.00 OAS1     | 4.34  | 0.59 | 0.20  |
| 50013.00 O05 | M-005969- matrix metal   | 4317.00 MMP8     | 4.90  | 1.15 | 0.38  |
| 50013.00 O06 | M-009345- nth endonuc    | 4913.00 NTHL1    | 6.44  | 2.69 | 0.90  |
| 50013.00 O07 | M-005970- matrix metal   | 4318.00 MMP9     | 8.24  | 4.49 | 1.50  |
| 50013.00 O08 | M-003919- neuroblastor   | 4893.00 NRAS     | 5.85  | 2.10 | 0.70  |
| 50013.00 O09 | M-004430- modulator of   | 64112.00 MOAP1   | 4.20  | 0.45 | 0.15  |
| 50013.00 O10 | M-005979- aminopeptid    | 9520.00 NPEPPS   | 7.58  | 3.83 | 1.28  |
| 50013.00 O11 | M-005146- N-methylpur    | 4350.00 MPG      | 1.85  | 1.90 | -0.63 |
| 50013.00 O12 | M-005977- neurolysin (n  | 57486.00 NLN     | 4.63  | 0.88 | 0.29  |
| 50013.00 O13 | M-011729- mannose phr    | 4351.00 MPI      | 3.95  | 0.20 | 0.07  |
| 50013.00 O14 | M-010614- septin 2       | 4735.00 SEPT2    | 3.43  | 0.32 | -0.11 |
| 50013.00 O15 | M-008586- muscle RAS c   | 22808.00 MRAS    | 3.90  | 0.15 | 0.05  |
| 50013.00 O16 | M-019063- Nedd4 bindir   | 55728.00 N4BP2   | 3.91  | 0.16 | 0.05  |
| 50013.00 O17 | M-009271- MRE11 meio     | 4361.00 MRE11A   | 4.16  | 0.41 | 0.14  |
| 50013.00 O18 | M-020341- MYB binding    | 10514.00 MYBBP1A | 3.41  | 0.34 | -0.12 |
| 50013.00 O19 | M-008946- macrophage     | 4485.00 MST1     | 0.86  | 2.89 | -0.97 |
| 50013.00 O20 | M-011736- myxovirus (ir  | 4600.00 MX2      | 1.23  | 2.52 | -0.84 |
| 50013.00 O21 | M-019244- myotubularir   | 66036.00 MTMR9   | 2.93  | 0.82 | -0.27 |
| 50013.00 O23 | M-008429- methylmalor    | 4594.00 MUT      | 0.76  | 2.99 | -1.00 |
| 50013.00 P02 | M-006102- X-prolyl amir  | 7512.00 XPNPEP2  | 3.15  | 0.60 | -0.20 |
| 50013.00 P04 | M-010378- Werner synd    | 7486.00 WRN      | 0.63  | 3.13 | -1.04 |
| 50013.00 P05 | M-004971- transglutami   | 7052.00 TGM2     | 3.46  | 0.29 | -0.10 |
| 50013.00 P06 | M-008322- tryptophanyl   | 7453.00 WARS     | 1.56  | 2.19 | -0.73 |
| 50013.00 P07 | M-009041- tyrosine hyd   | 7054.00 TH       | 4.04  | 0.29 | 0.10  |
| 50013.00 P08 | M-010384- ubiquitin-cor  | 7332.00 UBE2L3   | 2.25  | 1.50 | -0.50 |
| 50013.00 P09 | M-004734- transketolase  | 7086.00 TKT      | 1.27  | 2.48 | -0.83 |
| 50013.00 P10 | M-014161- activating sig | 23020.00 ASCC3L1 | 0.92  | 2.83 | -0.95 |
| 50013.00 P11 | M-004736- transketolase  | 8277.00 TKTL1    | 0.18  | 3.57 | -1.19 |
| 50013.00 P12 | M-015850- tRNA nucleoi   | 51095.00 TRNT1   | 1.47  | 2.28 | -0.76 |
| 50013.00 P13 | M-006046- tolloid-like 1 | 7092.00 TLL1     | 0.39  | 3.36 | -1.12 |
| 50013.00 P14 | M-010011- PAP associat   | 64282.00 PAPD5   | 1.99  | 1.77 | -0.59 |
| 50013.00 P15 | M-009976- tensin 1       | 7145.00 TNS1     | 2.62  | 1.13 | -0.38 |
| 50013.00 P16 | M-032280- three prime i  | 11219.00 TREX2   | 0.99  | 2.76 | -0.92 |
| 50013.00 P17 | M-009086- topoisomera    | 116447.00 TOP1MT | 0.45  | 3.30 | -1.10 |
| 50013.00 P18 | M-013239- three prime i  | 11277.00 TREX1   | 0.12  | 3.63 | -1.21 |
| 50013.00 P19 | M-004240- topoisomera    | 7155.00 TOP2B    | 1.52  | 2.23 | -0.74 |
| 50013.00 P20 | M-012358- topoisomera    | 11073.00 TOPBP1  | 4.26  | 0.51 | 0.17  |
| 50013.00 P21 | M-005279- topoisomera    | 7156.00 TOP3A    | 0.28  | 3.47 | -1.16 |
| 50013.00 P23 | M-005282- topoisomera    | 8940.00 TOP3B    | 0.41  | 3.34 | -1.11 |
| 50013.00     |                          | mdn              | 3.75  | 2.02 |       |
| 50013.00     |                          | 3XMAD            |       | 6.07 |       |
| 50013.00     |                          | MADc             |       | 3.00 |       |
| 50013.00     |                          |                  |       |      |       |
| 50013.00 C22 |                          |                  | 40.99 |      | 33.18 |
| 50013.00 D22 |                          |                  | 32.13 |      | 35.21 |
| E22          |                          |                  | 29.82 |      | 25.44 |
| F22          |                          |                  | 29.07 |      | 36.32 |

|          |     |                                     |                   |       |       |
|----------|-----|-------------------------------------|-------------------|-------|-------|
|          |     |                                     | 33.00             | 32.54 |       |
|          |     |                                     | 5.48              | 4.91  |       |
| 50013.00 |     |                                     |                   |       |       |
| 50013.00 | G22 |                                     | 0.69              | 4.83  |       |
| 50013.00 | H22 |                                     | 3.15              | 1.09  |       |
| 50013.00 | I22 |                                     | 1.43              | 2.23  |       |
|          | J22 |                                     | 1.30              | 0.87  |       |
|          |     |                                     | 1.64              | 2.25  |       |
|          |     |                                     | 1.05              | 1.81  |       |
| 50013.00 |     |                                     |                   |       |       |
| 50013.00 | G03 | M-003290- polo-like kinase          | 5347.00 PLK1 SMAF | 5.29  | 8.15  |
| 50013.00 | H03 | M-003290- polo-like kinase          | 5347.00 PLK1 SMAF | 6.77  | 3.42  |
| 50013.00 |     |                                     |                   |       |       |
|          | I03 | D-001206- siControl non-targeting s |                   | 9.72  | 3.31  |
|          | J03 | D-001206- siControl non-targeting s |                   | 2.07  | 5.76  |
|          |     |                                     |                   |       |       |
|          | K03 | D-001600- siGLO RISC-free siRNA     |                   | 21.96 | 17.21 |
|          | L03 | D-001600- siGLO RISC-free siRNA     |                   | 17.83 | 7.40  |

| <b>% inf</b> | <b>abs dev</b> | <b>robust Z</b> | <b>% inf</b> | <b>abs dev</b> | <b>robust Z</b> |
|--------------|----------------|-----------------|--------------|----------------|-----------------|
| 1.77         | 0.72           | -0.35           | 3.44         | 0.12           | -0.05           |
| 0.09         | 2.40           | -1.18           | 0.62         | 2.94           | -1.19           |
| 0.87         | 1.62           | -0.80           | 0.89         | 2.67           | -1.09           |
| 0.81         | 1.68           | -0.82           | 0.98         | 2.58           | -1.05           |
| 0.71         | 1.78           | -0.87           | 0.58         | 2.98           | -1.21           |
| 0.14         | 2.35           | -1.16           | 1.65         | 1.91           | -0.78           |
| 0.91         | 1.58           | -0.78           | 4.12         | 0.56           | 0.23            |
| 2.41         | 0.08           | -0.04           | 4.05         | 0.49           | 0.20            |
| 1.64         | 0.85           | -0.42           | 3.11         | 0.45           | -0.18           |
| 1.84         | 0.65           | -0.32           | 0.33         | 3.23           | -1.32           |
| 1.34         | 1.15           | -0.56           | 1.97         | 1.59           | -0.65           |
| 2.34         | 0.15           | -0.07           | 3.39         | 0.17           | -0.07           |
| 0.82         | 1.67           | -0.82           | 1.45         | 2.11           | -0.86           |
| 1.36         | 1.13           | -0.56           | 2.67         | 0.89           | -0.36           |
| 0.74         | 1.75           | -0.86           | 1.32         | 2.24           | -0.91           |
| 1.12         | 1.37           | -0.67           | 2.73         | 0.83           | -0.34           |
| 2.38         | 0.11           | -0.05           | 2.35         | 1.21           | -0.49           |
| 4.58         | 2.09           | 1.03            | 5.70         | 2.14           | 0.87            |
| 0.35         | 2.14           | -1.05           | 3.21         | 0.35           | -0.14           |
| 1.56         | 0.93           | -0.46           | 10.86        | 7.30           | 2.96            |
| 1.00         | 1.49           | -0.73           | 2.09         | 1.47           | -0.60           |
| 1.97         | 0.52           | -0.26           | 1.83         | 1.73           | -0.70           |
| 0.89         | 1.60           | -0.79           | 1.88         | 1.68           | -0.69           |
| 0.36         | 2.13           | -1.05           | 0.32         | 3.24           | -1.32           |
| 8.41         | 5.92           | 2.92            | 4.79         | 1.23           | 0.50            |
| 0.32         | 2.17           | -1.07           | 0.56         | 3.00           | -1.22           |
| 3.97         | 1.48           | 0.73            | 3.30         | 0.26           | -0.11           |
| 0.23         | 2.26           | -1.11           | 0.28         | 3.28           | -1.33           |
| 1.07         | 1.42           | -0.70           | 0.32         | 3.24           | -1.32           |
| 0.93         | 1.56           | -0.77           | 3.43         | 0.13           | -0.06           |
| 0.16         | 2.33           | -1.15           | 1.13         | 2.43           | -0.99           |
| 0.65         | 1.84           | -0.90           | 2.63         | 0.93           | -0.38           |
| 0.39         | 2.10           | -1.04           | 1.68         | 1.88           | -0.77           |
| 0.43         | 2.06           | -1.01           | 1.65         | 1.91           | -0.78           |
| 3.34         | 0.85           | 0.42            | 1.42         | 2.14           | -0.87           |
| 2.07         | 0.42           | -0.21           | 6.99         | 3.43           | 1.39            |
| 1.51         | 0.98           | -0.48           | 4.11         | 0.55           | 0.22            |
| 1.44         | 1.05           | -0.51           | 3.90         | 0.34           | 0.14            |
| 3.56         | 1.07           | 0.53            | 5.64         | 2.08           | 0.84            |
| 3.96         | 1.47           | 0.72            | 6.68         | 3.12           | 1.26            |
| 2.01         | 0.48           | -0.24           | 3.66         | 0.10           | 0.04            |
| 2.33         | 0.16           | -0.08           | 2.37         | 1.19           | -0.49           |
| 1.99         | 0.50           | -0.25           | 3.60         | 0.04           | 0.02            |
| 3.06         | 0.57           | 0.28            | 1.34         | 2.22           | -0.90           |
| 1.63         | 0.86           | -0.42           | 1.32         | 2.24           | -0.91           |
| 8.67         | 6.18           | 3.04            | 3.24         | 0.32           | -0.13           |

|       |       |       |      |      |       |
|-------|-------|-------|------|------|-------|
| 8.34  | 5.85  | 2.88  | 6.49 | 2.93 | 1.19  |
| 3.36  | 0.87  | 0.43  | 3.20 | 0.36 | -0.15 |
| 3.45  | 0.96  | 0.47  | 2.87 | 0.69 | -0.28 |
| 1.75  | 0.74  | -0.36 | 1.07 | 2.49 | -1.01 |
| 0.61  | 1.88  | -0.92 | 1.58 | 1.98 | -0.81 |
| 0.55  | 1.94  | -0.96 | 2.08 | 1.48 | -0.60 |
| 7.42  | 4.93  | 2.43  | 5.17 | 1.61 | 0.65  |
| 2.80  | 0.31  | 0.15  | 2.42 | 1.14 | -0.46 |
| 1.01  | 1.48  | -0.73 | 0.53 | 3.03 | -1.23 |
| 3.99  | 1.50  | 0.74  | 5.98 | 2.42 | 0.98  |
| 4.17  | 1.68  | 0.83  | 4.55 | 0.99 | 0.40  |
| 2.35  | 0.14  | -0.07 | 3.93 | 0.37 | 0.15  |
| 1.32  | 1.17  | -0.58 | 3.18 | 0.38 | -0.16 |
| 0.72  | 1.77  | -0.87 | 1.92 | 1.64 | -0.67 |
| 6.47  | 3.98  | 1.96  | 6.56 | 3.00 | 1.22  |
| 4.29  | 1.80  | 0.89  | 3.43 | 0.13 | -0.05 |
| 2.50  | 0.01  | 0.01  | 3.50 | 0.06 | -0.02 |
| 1.60  | 0.89  | -0.44 | 1.45 | 2.11 | -0.86 |
| 2.45  | 0.04  | -0.02 | 1.10 | 2.46 | -1.00 |
| 0.31  | 2.18  | -1.07 | 0.70 | 2.86 | -1.16 |
| 3.58  | 1.09  | 0.54  | 2.89 | 0.67 | -0.27 |
| 4.03  | 1.54  | 0.76  | 3.22 | 0.34 | -0.14 |
| 1.52  | 0.97  | -0.48 | 0.35 | 3.21 | -1.31 |
| 0.43  | 2.06  | -1.01 | 1.32 | 2.24 | -0.91 |
| 1.71  | 0.78  | -0.38 | 2.21 | 1.35 | -0.55 |
| 2.65  | 0.16  | 0.08  | 1.29 | 2.27 | -0.92 |
| 2.38  | 0.11  | -0.05 | 1.64 | 1.92 | -0.78 |
| 1.66  | 0.83  | -0.41 | 2.78 | 0.78 | -0.32 |
| 7.08  | 4.59  | 2.26  | 2.86 | 0.70 | -0.28 |
| 7.27  | 4.78  | 2.35  | 4.81 | 1.25 | 0.51  |
| 5.76  | 3.27  | 1.61  | 6.94 | 3.38 | 1.37  |
| 4.22  | 1.73  | 0.85  | 2.62 | 0.94 | -0.38 |
| 13.18 | 10.69 | 5.26  | 6.60 | 3.04 | 1.23  |
| 5.45  | 2.96  | 1.46  | 5.29 | 1.73 | 0.70  |
| 1.41  | 1.08  | -0.53 | 0.43 | 3.13 | -1.27 |
| 4.15  | 1.66  | 0.82  | 1.00 | 2.56 | -1.04 |
| 3.14  | 0.65  | 0.32  | 1.78 | 1.78 | -0.73 |
| 7.12  | 4.63  | 2.28  | 1.35 | 2.21 | -0.90 |
| 2.62  | 0.13  | 0.07  | 2.01 | 1.55 | -0.63 |
| 4.64  | 2.15  | 1.06  | 3.55 | 0.01 | 0.00  |
| 2.54  | 0.05  | 0.03  | 0.56 | 3.00 | -1.22 |
| 5.02  | 2.53  | 1.25  | 2.85 | 0.71 | -0.29 |
| 1.87  | 0.62  | -0.31 | 3.41 | 0.15 | -0.06 |
| 1.01  | 1.48  | -0.73 | 0.64 | 2.92 | -1.19 |
| 2.88  | 0.39  | 0.20  | 3.45 | 0.11 | -0.05 |
| 0.23  | 2.26  | -1.11 | 0.32 | 3.24 | -1.32 |
| 2.05  | 0.44  | -0.22 | 1.26 | 2.30 | -0.94 |

|              |              |              |              |              |               |
|--------------|--------------|--------------|--------------|--------------|---------------|
| 1.07         | 1.42         | -0.70        | 1.26         | 2.30         | -0.94         |
| 0.55         | 1.94         | -0.95        | 2.06         | 1.50         | -0.61         |
| <b>4.08</b>  | <b>1.59</b>  | <b>0.79</b>  | <b>12.20</b> | <b>8.64</b>  | <b>3.51</b> y |
| 2.20         | 0.29         | -0.14        | 5.07         | 1.51         | 0.61          |
| 0.70         | 1.79         | -0.88        | 0.85         | 2.71         | -1.10         |
| 1.08         | 1.41         | -0.70        | 1.95         | 1.61         | -0.66         |
| 1.52         | 0.97         | -0.48        | 5.14         | 1.58         | 0.64          |
| 0.45         | 2.04         | -1.00        | 2.70         | 0.86         | -0.35         |
| 2.64         | 0.15         | 0.08         | 5.03         | 1.47         | 0.60          |
| 3.71         | 1.22         | 0.60         | 6.24         | 2.68         | 1.09          |
| 5.06         | 2.57         | 1.26         | 2.00         | 1.56         | -0.63         |
| 5.87         | 3.38         | 1.67         | 2.23         | 1.33         | -0.54         |
| 3.88         | 1.39         | 0.68         | 3.37         | 0.19         | -0.08         |
| 2.20         | 0.29         | -0.14        | 1.96         | 1.60         | -0.65         |
| 11.01        | <b>8.52</b>  | <b>4.20</b>  | 4.21         | 0.65         | 0.26          |
| <b>7.58</b>  | <b>5.09</b>  | <b>2.51</b>  | <b>10.90</b> | <b>7.34</b>  | <b>2.98</b> y |
| 1.13         | 1.36         | -0.67        | 1.21         | 2.35         | -0.96         |
| 1.69         | 0.80         | -0.39        | 1.74         | 1.82         | -0.74         |
| 1.36         | 1.13         | -0.56        | 2.95         | 0.61         | -0.25         |
| 3.02         | 0.53         | 0.26         | 3.12         | 0.44         | -0.18         |
| 3.26         | 0.77         | 0.38         | 5.09         | 1.53         | 0.62          |
| 2.10         | 0.39         | -0.19        | 4.05         | 0.49         | 0.20          |
| 1.19         | 1.30         | -0.64        | 4.47         | 0.91         | 0.37          |
| 0.72         | 1.77         | -0.87        | 1.25         | 2.31         | -0.94         |
| 2.82         | 0.33         | 0.16         | 3.81         | 0.25         | 0.10          |
| 5.16         | 2.67         | 1.31         | 12.05        | <b>8.49</b>  | <b>3.44</b>   |
| 4.22         | 1.73         | 0.85         | 7.15         | 3.59         | 1.46          |
| 0.92         | 1.57         | -0.77        | 1.94         | 1.62         | -0.66         |
| 2.48         | 0.01         | 0.00         | 3.76         | 0.20         | 0.08          |
| 4.16         | 1.67         | 0.82         | 3.41         | 0.15         | -0.06         |
| 2.52         | 0.03         | 0.02         | 1.75         | 1.81         | -0.73         |
| <b>13.83</b> | <b>11.34</b> | <b>5.59</b>  | <b>4.56</b>  | <b>1.00</b>  | <b>0.40</b> y |
| 9.89         | <b>7.40</b>  | <b>3.65</b>  | 1.95         | 1.61         | -0.66         |
| 4.45         | 1.96         | 0.97         | 3.24         | 0.32         | -0.13         |
| 6.70         | <b>4.21</b>  | <b>2.08</b>  | 1.38         | 2.18         | -0.89         |
| 6.79         | <b>4.30</b>  | <b>2.12</b>  | 4.09         | 0.53         | 0.21          |
| 7.22         | <b>4.73</b>  | <b>2.33</b>  | 4.34         | 0.78         | 0.31          |
| 3.58         | 1.09         | 0.54         | 5.93         | 2.37         | 0.96          |
| 3.71         | 1.22         | 0.60         | 9.58         | <b>6.02</b>  | <b>2.44</b>   |
| <b>14.56</b> | <b>12.07</b> | <b>5.94</b>  | <b>13.93</b> | <b>10.37</b> | <b>4.21</b> y |
| 12.92        | <b>10.43</b> | <b>5.14</b>  | 9.83         | <b>6.27</b>  | <b>2.55</b> y |
| <b>23.33</b> | <b>20.84</b> | <b>10.26</b> | <b>25.92</b> | <b>22.36</b> | <b>9.08</b> y |
| 10.39        | <b>7.90</b>  | <b>3.89</b>  | 7.86         | 4.30         | 1.74          |
| <b>16.22</b> | <b>13.73</b> | <b>6.76</b>  | <b>12.66</b> | <b>9.10</b>  | <b>3.70</b> y |
| 2.04         | 0.45         | -0.22        | 2.49         | 1.07         | -0.44         |
| 3.02         | 0.53         | 0.26         | 3.56         | 0.00         | 0.00          |
| 5.59         | 3.10         | 1.53         | 10.86        | <b>7.30</b>  | <b>2.96</b>   |

|             |             |       |              |              |        |
|-------------|-------------|-------|--------------|--------------|--------|
| 3.52        | 1.03        | 0.51  | 7.78         | 4.22         | 1.71   |
| <b>8.67</b> | <b>6.18</b> | 3.04  | <b>9.61</b>  | <b>6.05</b>  | 2.46 y |
| 2.11        | 0.38        | -0.19 | 1.92         | 1.64         | -0.67  |
| 7.91        | <b>5.42</b> | 2.67  | 7.93         | 4.37         | 1.77   |
| <b>7.89</b> | <b>5.40</b> | 2.66  | <b>11.29</b> | <b>7.73</b>  | 3.14 y |
| 1.15        | 1.34        | -0.66 | 4.15         | 0.59         | 0.24   |
| 7.16        | <b>4.67</b> | 2.30  | 7.27         | 3.71         | 1.50   |
| 1.45        | 1.04        | -0.51 | 3.80         | 0.24         | 0.10   |
| 2.44        | 0.05        | -0.02 | 11.88        | <b>8.32</b>  | 3.38   |
| 5.85        | 3.36        | 1.66  | 8.50         | 4.94         | 2.01   |
| <b>8.67</b> | <b>6.18</b> | 3.04  | <b>14.84</b> | <b>11.28</b> | 4.58 y |
| 4.91        | 2.42        | 1.19  | 8.68         | <b>5.12</b>  | 2.08   |
| 4.22        | 1.73        | 0.85  | 9.28         | <b>5.72</b>  | 2.32   |
| 3.11        | 0.62        | 0.31  | 9.81         | <b>6.25</b>  | 2.54   |
| <b>6.20</b> | <b>3.71</b> | 1.83  | <b>10.88</b> | <b>7.32</b>  | 2.97 y |
| 5.61        | 3.12        | 1.54  | 6.68         | 3.12         | 1.26   |
| 4.07        | 1.58        | 0.78  | 14.25        | <b>10.69</b> | 4.34   |
| 2.84        | 0.35        | 0.17  | 9.65         | <b>6.09</b>  | 2.47   |
| 2.08        | 0.41        | -0.20 | 7.10         | 3.54         | 1.43   |
| 0.36        | 2.13        | -1.05 | 5.72         | 2.16         | 0.87   |
| 1.14        | 1.35        | -0.66 | 5.02         | 1.46         | 0.59   |
| <b>9.02</b> | <b>6.53</b> | 3.22  | <b>11.22</b> | <b>7.66</b>  | 3.11 y |
| <b>7.53</b> | <b>5.04</b> | 2.48  | <b>4.01</b>  | <b>0.45</b>  | 0.18 y |
| 0.50        | 1.99        | -0.98 | 2.30         | 1.26         | -0.51  |
| 6.91        | <b>4.42</b> | 2.18  | 6.67         | 3.11         | 1.26 x |
| 0.68        | 1.81        | -0.89 | 2.81         | 0.75         | -0.30  |
| 3.06        | 0.57        | 0.28  | 4.80         | 1.24         | 0.50   |
| 2.62        | 0.13        | 0.07  | 2.78         | 0.78         | -0.32  |
| 1.13        | 1.36        | -0.67 | 1.36         | 2.20         | -0.90  |
| 2.92        | 0.43        | 0.21  | 3.36         | 0.20         | -0.08  |
| 3.14        | 0.65        | 0.32  | 0.98         | 2.58         | -1.05  |
| 1.12        | 1.37        | -0.67 | 2.51         | 1.05         | -0.43  |
| 6.55        | 4.06        | 2.00  | 5.28         | 1.72         | 0.70   |
| 2.49        | 0.00        | 0.00  | 2.92         | 0.64         | -0.26  |
| 6.53        | 4.04        | 1.99  | 5.41         | 1.85         | 0.75   |
| 2.88        | 0.39        | 0.19  | 4.29         | 0.73         | 0.29   |
| 4.18        | 1.69        | 0.83  | 5.29         | 1.73         | 0.70   |
| 3.18        | 0.69        | 0.34  | 2.79         | 0.77         | -0.31  |
| 4.05        | 1.56        | 0.77  | 8.67         | <b>5.11</b>  | 2.07   |
| 2.99        | 0.50        | 0.25  | 7.28         | 3.72         | 1.51   |
| 1.06        | 1.43        | -0.70 | 2.32         | 1.24         | -0.50  |
| 2.31        | 0.18        | -0.09 | 1.08         | 2.48         | -1.01  |
| 5.97        | 3.48        | 1.71  | 3.63         | 0.07         | 0.03   |
| 1.72        | 0.77        | -0.38 | 2.77         | 0.79         | -0.32  |
| 1.74        | 0.75        | -0.37 | 3.78         | 0.22         | 0.09   |
| 1.59        | 0.90        | -0.44 | 2.41         | 1.15         | -0.47  |
| 4.58        | 2.09        | 1.03  | 4.66         | 1.10         | 0.45   |

txc a,b,c

|       |      |       |       |       |        |
|-------|------|-------|-------|-------|--------|
| 1.18  | 1.31 | -0.64 | 1.94  | 1.62  | -0.66  |
| 2.09  | 0.40 | -0.19 | 6.48  | 2.92  | 1.18   |
| 1.94  | 0.55 | -0.27 | 3.83  | 0.27  | 0.11   |
| 0.94  | 1.55 | -0.76 | 6.36  | 2.80  | 1.13   |
| 1.47  | 1.02 | -0.50 | 2.28  | 1.28  | -0.52  |
| 2.81  | 0.32 | 0.16  | 1.09  | 2.47  | -1.01  |
| 5.56  | 3.07 | 1.51  | 5.33  | 1.77  | 0.72   |
| 2.87  | 0.38 | 0.19  | 0.76  | 2.80  | -1.14  |
| 2.86  | 0.37 | 0.18  | 2.81  | 0.75  | -0.30  |
| 4.39  | 1.90 | 0.94  | 6.26  | 2.70  | 1.10   |
| 1.73  | 0.76 | -0.37 | 5.05  | 1.49  | 0.60   |
| 1.34  | 1.15 | -0.56 | 1.64  | 1.92  | -0.78  |
| 5.75  | 3.26 | 1.61  | 19.12 | 15.56 | 6.32   |
| 1.12  | 1.37 | -0.67 | 2.88  | 0.68  | -0.28  |
| 6.76  | 4.27 | 2.10  | 2.20  | 1.36  | -0.55  |
| 1.74  | 0.75 | -0.37 | 4.66  | 1.10  | 0.45   |
| 10.13 | 7.64 | 3.76  | 7.57  | 4.01  | 1.63 y |
| 5.84  | 3.35 | 1.65  | 7.65  | 4.09  | 1.66   |
| 2.46  | 0.03 | -0.01 | 5.49  | 1.93  | 0.78   |
| 9.07  | 6.58 | 3.24  | 11.08 | 7.52  | 3.05 y |
| 3.68  | 1.19 | 0.59  | 2.71  | 0.85  | -0.34  |
| 4.39  | 1.90 | 0.94  | 6.24  | 2.68  | 1.09   |
| 2.48  | 0.01 | -0.01 | 2.87  | 0.69  | -0.28  |
| 0.39  | 2.10 | -1.03 | 1.03  | 2.53  | -1.03  |
| 2.17  | 0.32 | -0.16 | 2.78  | 0.78  | -0.32  |
| 0.86  | 1.63 | -0.80 | 3.20  | 0.36  | -0.15  |
| 7.16  | 4.67 | 2.30  | 6.20  | 2.64  | 1.07   |
| 2.92  | 0.43 | 0.21  | 5.26  | 1.70  | 0.69   |
| 2.21  | 0.28 | -0.14 | 3.85  | 0.29  | 0.11   |
| 1.35  | 1.14 | -0.56 | 4.41  | 0.85  | 0.34   |
| 1.27  | 1.22 | -0.60 | 2.30  | 1.26  | -0.51  |
| 1.48  | 1.01 | -0.50 | 6.20  | 2.64  | 1.07   |
| 1.08  | 1.41 | -0.69 | 3.30  | 0.26  | -0.11  |
| 4.37  | 1.88 | 0.93  | 6.69  | 3.13  | 1.27   |
| 0.38  | 2.11 | -1.04 | 0.56  | 3.00  | -1.22  |
| 1.95  | 0.54 | -0.26 | 3.16  | 0.40  | -0.16  |
| 6.51  | 4.02 | 1.98  | 0.39  | 3.17  | -1.29  |
| 7.45  | 4.96 | 2.44  | 5.25  | 1.69  | 0.69 y |
| 3.23  | 0.74 | 0.37  | 3.76  | 0.20  | 0.08   |
| 2.02  | 0.47 | -0.23 | 3.23  | 0.33  | -0.14  |
| 4.26  | 1.77 | 0.87  | 0.64  | 2.92  | -1.19  |
| 2.73  | 0.24 | 0.12  | 4.41  | 0.85  | 0.34   |
| 0.40  | 2.09 | -1.03 | 1.64  | 1.92  | -0.78  |
| 5.23  | 2.74 | 1.35  | 4.98  | 1.42  | 0.58   |
| 2.67  | 0.18 | 0.09  | 1.14  | 2.42  | -0.98  |
| 8.98  | 6.49 | 3.20  | 12.02 | 8.46  | 3.43 y |
| 6.72  | 4.23 | 2.09  | 2.96  | 0.60  | -0.25  |



|              |              |             |              |              |               |
|--------------|--------------|-------------|--------------|--------------|---------------|
| 2.98         | 0.49         | 0.24        | 3.25         | 0.31         | -0.13         |
| 1.59         | 0.90         | -0.44       | 3.19         | 0.37         | -0.15         |
| 0.86         | 1.63         | -0.80       | 4.06         | 0.50         | 0.20          |
| 2.53         | 0.04         | 0.02        | 5.16         | 1.60         | 0.65          |
| <b>12.08</b> | <b>9.59</b>  | <b>4.72</b> | <b>9.03</b>  | <b>5.47</b>  | <b>2.22</b> y |
| 5.23         | 2.74         | 1.35        | 5.80         | 2.24         | 0.91          |
| 0.83         | 1.66         | -0.82       | 1.28         | 2.28         | -0.93         |
| 4.91         | 2.42         | 1.19        | 4.95         | 1.39         | 0.56          |
| 2.19         | 0.30         | -0.14       | 6.02         | 2.46         | 1.00          |
| 3.40         | 0.91         | 0.45        | 6.77         | 3.21         | 1.30          |
| 1.63         | 0.86         | -0.42       | 7.32         | 3.76         | 1.52          |
| 4.59         | 2.10         | 1.04        | 2.77         | 0.79         | -0.32         |
| <b>5.03</b>  | <b>2.54</b>  | <b>1.25</b> | <b>9.66</b>  | <b>6.10</b>  | <b>2.48</b> y |
| <b>12.66</b> | <b>10.17</b> | <b>5.01</b> | <b>18.47</b> | <b>14.91</b> | <b>6.05</b> y |
| 5.66         | 3.17         | 1.56        | 8.20         | 4.64         | 1.88          |
| <b>5.15</b>  | <b>2.66</b>  | <b>1.31</b> | <b>11.24</b> | <b>7.68</b>  | <b>3.12</b> y |
| 5.43         | 2.94         | 1.45        | 5.34         | 1.78         | 0.72          |
| 1.60         | 0.89         | -0.44       | 4.11         | 0.55         | 0.22          |
| 1.12         | 1.37         | -0.67       | 2.15         | 1.41         | -0.58         |
| 1.14         | 1.35         | -0.66       | 7.60         | 4.04         | 1.64          |
| 1.24         | 1.25         | -0.61       | 2.43         | 1.13         | -0.46         |
| 4.23         | 1.74         | 0.86        | 8.55         | <b>4.99</b>  | <b>2.03</b>   |
| 1.97         | 0.52         | -0.26       | 5.08         | 1.52         | 0.61          |
| 1.10         | 1.39         | -0.68       | 1.15         | 2.41         | -0.98         |
| 0.85         | 1.64         | -0.81       | 2.38         | 1.18         | -0.48         |
| 0.80         | 1.69         | -0.83       | 4.50         | 0.94         | 0.38          |
| 0.85         | 1.64         | -0.81       | 4.61         | 1.05         | 0.42          |
| 2.73         | 0.24         | 0.12        | 3.73         | 0.17         | 0.07          |
| 3.94         | 1.45         | 0.72        | 0.73         | 2.83         | -1.15         |
| 2.30         | 0.19         | -0.09       | 6.59         | 3.03         | 1.23          |
| 1.67         | 0.82         | -0.40       | 3.53         | 0.03         | -0.01         |
| 2.17         | 0.32         | -0.16       | 5.33         | 1.77         | 0.72          |
| 1.31         | 1.18         | -0.58       | 2.88         | 0.68         | -0.28         |
| 1.05         | 1.44         | -0.71       | 2.92         | 0.64         | -0.26         |
| 1.92         | 0.57         | -0.28       | 3.52         | 0.04         | -0.02         |
| 2.52         | 0.03         | 0.02        | 6.20         | 2.64         | 1.07          |
| 4.55         | 2.06         | 1.01        | 4.62         | 1.06         | 0.43          |
| 1.95         | 0.54         | -0.27       | 4.05         | 0.49         | 0.20          |
| 2.78         | 0.29         | 0.14        | 4.74         | 1.18         | 0.48          |
| 6.57         | 4.08         | <b>2.01</b> | 7.36         | 3.80         | 1.54          |
| 1.79         | 0.70         | -0.34       | 8.99         | <b>5.43</b>  | <b>2.20</b>   |
| 4.54         | 2.05         | 1.01        | 4.09         | 0.53         | 0.22          |
| 3.51         | 1.02         | 0.51        | 2.72         | 0.84         | -0.34         |
| 5.96         | 3.47         | 1.71        | 4.91         | 1.35         | 0.55          |
| 1.21         | 1.28         | -0.63       | 1.38         | 2.18         | -0.89         |
| 1.60         | 0.89         | -0.44       | 5.83         | 2.27         | 0.92          |
| 1.14         | 1.35         | -0.66       | 5.41         | 1.85         | 0.75          |

|      |      |       |       |       |        |
|------|------|-------|-------|-------|--------|
| 1.66 | 0.84 | -0.41 | 2.96  | 0.60  | -0.24  |
| 3.54 | 1.05 | 0.52  | 2.38  | 1.18  | -0.48  |
| 6.43 | 3.94 | 1.94  | 4.68  | 1.12  | 0.45   |
| 4.46 | 1.97 | 0.97  | 8.32  | 4.76  | 1.93   |
| 3.24 | 0.75 | 0.37  | 4.35  | 0.79  | 0.32   |
| 4.52 | 2.03 | 1.00  | 5.45  | 1.89  | 0.77   |
| 3.72 | 1.23 | 0.61  | 8.00  | 4.44  | 1.80   |
| 1.63 | 0.86 | -0.42 | 2.37  | 1.19  | -0.48  |
| 1.91 | 0.58 | -0.28 | 2.67  | 0.89  | -0.36  |
| 2.14 | 0.35 | -0.17 | 2.83  | 0.73  | -0.30  |
| 1.15 | 1.34 | -0.66 | 5.80  | 2.24  | 0.91   |
| 1.79 | 0.70 | -0.34 | 12.73 | 9.17  | 3.72   |
| 3.74 | 1.25 | 0.62  | 12.50 | 8.94  | 3.63   |
| 2.45 | 0.04 | -0.02 | 5.19  | 1.63  | 0.66   |
| 1.32 | 1.17 | -0.57 | 5.90  | 2.34  | 0.95   |
| 2.21 | 0.28 | -0.14 | 8.29  | 4.73  | 1.92   |
| 1.05 | 1.44 | -0.71 | 3.35  | 0.21  | -0.09  |
| 4.50 | 2.01 | 0.99  | 5.88  | 2.32  | 0.94   |
| 0.57 | 1.92 | -0.94 | 4.99  | 1.43  | 0.58   |
| 2.57 | 0.08 | 0.04  | 1.67  | 1.89  | -0.77  |
| 3.41 | 0.92 | 0.45  | 3.62  | 0.06  | 0.02   |
| 2.94 | 0.45 | 0.22  | 4.50  | 0.94  | 0.38   |
| 1.54 | 0.95 | -0.47 | 2.60  | 0.96  | -0.39  |
| 1.33 | 1.16 | -0.57 | 3.93  | 0.37  | 0.15   |
| 0.88 | 1.61 | -0.79 | 4.42  | 0.86  | 0.35   |
| 5.42 | 2.93 | 1.44  | 3.91  | 0.35  | 0.14   |
| 1.15 | 1.34 | -0.66 | 2.70  | 0.86  | -0.35  |
| 2.31 | 0.18 | -0.09 | 3.40  | 0.16  | -0.07  |
| 2.87 | 0.38 | 0.19  | 1.44  | 2.12  | -0.86  |
| 0.43 | 2.06 | -1.01 | 1.58  | 1.98  | -0.81  |
| 2.07 | 0.42 | -0.21 | 5.60  | 2.04  | 0.83   |
| 5.86 | 3.37 | 1.66  | 10.52 | 6.96  | 2.82   |
| 1.64 | 0.85 | -0.42 | 3.08  | 0.48  | -0.20  |
| 1.35 | 1.14 | -0.56 | 3.57  | 0.01  | 0.00   |
| 1.12 | 1.37 | -0.67 | 2.49  | 1.07  | -0.44  |
| 3.44 | 0.95 | 0.47  | 3.68  | 0.12  | 0.05   |
| 7.58 | 5.09 | 2.51  | 15.41 | 11.85 | 4.81 y |
| 4.28 | 1.79 | 0.88  | 5.39  | 1.83  | 0.74   |
| 4.40 | 1.91 | 0.94  | 2.81  | 0.75  | -0.31  |
| 2.49 | 1.37 |       | 3.56  | 1.66  |        |
|      | 4.12 |       |       | 4.99  |        |
|      | 2.03 |       |       | 2.46  |        |

34.37  
37.70  
24.59  
34.97

32.91

5.73

|      | <b>A</b>  | <b>B</b> | <b>C</b> |       |
|------|-----------|----------|----------|-------|
| 3.87 | 3psSD     | 16.44    | 14.72    | 17.19 |
| 3.94 | 3ngSD     | 3.16     | 5.44     | 6.96  |
| 0.80 | SumSD     | 19.60    | 20.16    | 24.14 |
| 6.46 | DiffMn    | 31.36    | 30.28    | 29.14 |
| 3.77 | SmovrDiff | 0.63     | 0.67     | 0.83  |
| 2.32 | 1minus    | 0.37     | 0.33     | 0.17  |

2.94

3.92

3.13

2.02

13.60

10.42

|              |                                   |                   | <u>% inf</u> | <u>abs dev</u> | <u>robust Z</u> |
|--------------|-----------------------------------|-------------------|--------------|----------------|-----------------|
| 50014.00 A02 | M-020011- lipoprotein, Lp(a)      | 4018.00 LPA       | 3.51         | 1.13           | -0.37           |
| 50014.00 A04 | M-010972- apolipoprotein C-II     | 344.00 APOC2      | 2.04         | 2.60           | -0.86           |
| 50014.00 A05 | M-010195- NADPH oxidase, EF-ha    | 79400.00 NOX5     | 1.03         | 3.61           | -1.20           |
| 50014.00 A06 | M-016221- SRB7 suppressor of RI   | 9412.00 SURB7     | 1.51         | 3.13           | -1.03           |
| 50014.00 A07 | M-009752- pyruvate dehydrogen     | 8050.00 PDHX      | 10.08        | 5.44           | 1.80            |
| 50014.00 A08 | M-003759- nuclear receptor coac   | 8202.00 NCOA3     | 2.73         | 1.91           | -0.63           |
| 50014.00 A09 | M-009698- prostaglandin D2 synt   | 5730.00 PTGDS     | 6.35         | 1.71           | 0.56            |
| 50014.00 A10 | M-003477- CREB binding protein    | 1387.00 CREBBP    | 6.40         | 1.76           | 0.58            |
| 50014.00 A11 | M-012689- putative neuronal cell  | 9543.00 PUNC      | 7.87         | 3.23           | 1.07            |
| 50014.00 A12 | M-004429- MAP-kinase activating   | 8567.00 MADD      | 4.92         | 0.28           | 0.09            |
| 50014.00 A13 | M-004726- RAB11A, member RAS      | 8766.00 RAB11A    | 2.61         | 2.03           | -0.67           |
| 50014.00 A14 | M-004401- caspase 1, apoptosis-i  | 834.00 CASP1      | 4.47         | 0.17           | -0.06           |
| 50014.00 A15 | M-004727- RAB11B, member RAS      | 9230.00 RAB11B    | 2.57         | 2.07           | -0.68           |
| 50014.00 A16 | M-019737- transforming growth     | 7039.00 TGFA      | 2.78         | 1.86           | -0.61           |
| 50014.00 A17 | M-008389- RAB13, member RAS       | 5872.00 RAB13     | 6.41         | 1.77           | 0.58            |
| 50014.00 A18 | M-008438- scavenger receptor cy   | 136853.00 SRCRB4D | 8.14         | 3.50           | 1.16            |
| 50014.00 A19 | M-010824- RAB18, member RAS       | 22931.00 RAB18    | 5.06         | 0.42           | 0.14            |
| 50014.00 A20 | M-008339- phospholipase C, gam    | 5336.00 PLCG2     | 6.43         | 1.79           | 0.59            |
| 50014.00 A21 | M-008283- RAB1A, member RAS       | 5861.00 RAB1A     | 4.02         | 0.62           | -0.21           |
| 50014.00 A23 | M-009553- RAB36, member RAS       | 9609.00 RAB36     | 8.01         | 3.37           | 1.12            |
| 50014.00 B02 | M-011126- CD79b molecule, imm     | 974.00 CD79B      | 16.45        | 11.81          | 3.90            |
| 50014.00 B04 | M-011606- CD79a molecule, imm     | 973.00 CD79A      | 6.78         | 2.14           | 0.71            |
| 50014.00 B05 | M-011097- oculocutaneous albin    | 4948.00 OCA2      | 1.63         | 3.01           | -1.00           |
| 50014.00 B06 | M-012667- CD74 molecule, majo     | 972.00 CD74       | 5.21         | 0.57           | 0.19            |
| 50014.00 B07 | M-006004- cathepsin A             | 5476.00 CTSA      | 3.46         | 1.18           | -0.39           |
| 50014.00 B08 | M-007849- CD5 molecule-like       | 922.00 CD5L       | 1.46         | 3.18           | -1.05           |
| 50014.00 B09 | M-008611- active BCR-related ge   | 29.00 ABR         | 4.13         | 0.51           | -0.17           |
| 50014.00 B10 | M-017239- CD200 receptor 1        | 131450.00 CD200R1 | 2.26         | 2.38           | -0.79           |
| 50014.00 B11 | M-014168- amyotrophic lateral s   | 57679.00 ALS2     | 4.17         | 0.47           | -0.16           |
| 50014.00 B12 | M-017576- CD19 molecule           | 930.00 CD19       | 3.43         | 1.21           | -0.40           |
| 50014.00 B13 | M-007807- angiotensin-like 4      | 51129.00 ANGPTL4  | 1.99         | 2.65           | -0.88           |
| 50014.00 B14 | M-007847- CD163 molecule          | 9332.00 CD163     | 6.84         | 2.20           | 0.73            |
| 50014.00 B15 | M-012208- ADP-ribosylation fact   | 10564.00 ARFGEF2  | 3.16         | 1.48           | -0.49           |
| 50014.00 B16 | M-011599- butyrophilin, subfami   | 696.00 BTN1A1     | 4.02         | 0.62           | -0.20           |
| 50014.00 B17 | M-010893- Rho GDP dissociation    | 397.00 ARHGDIB    | 2.58         | 2.06           | -0.68           |
| 50014.00 B18 | M-010737- basigin (Ok blood gro   | 682.00 BSG        | 3.07         | 1.57           | -0.52           |
| 50014.00 B19 | M-012566- Rho GDP dissociation    | 398.00 ARHGDIG    | 5.61         | 0.97           | 0.32            |
| 50014.00 B20 | M-008809- axin 2 (conductin, axil | 8313.00 AXIN2     | 1.46         | 3.18           | -1.05           |
| 50014.00 B21 | M-013243- Rho guanine nucleoti    | 50650.00 ARHGEF3  | 4.75         | 0.11           | 0.03            |
| 50014.00 B23 | M-008235- Rho guanine nucleoti    | 50649.00 ARHGEF4  | 6.51         | 1.87           | 0.62            |
| 50014.00 C02 | M-003559- phospholipase C, gam    | 5335.00 PLCG1     | 4.30         | 0.34           | -0.11           |
| 50014.00 C04 | M-009149- phospholipase C, delt   | 5333.00 PLCD1     | 2.46         | 2.18           | -0.72           |
| 50014.00 C05 | M-010059- RAB38, member RAS       | 23682.00 RAB38    | 4.08         | 0.56           | -0.19           |

|              |                                   |                  |       |       |       |
|--------------|-----------------------------------|------------------|-------|-------|-------|
| 50014.00 C06 | M-009249- peptidoglycan recogn    | 8993.00 PGLYRP1  | 3.74  | 0.90  | -0.30 |
| 50014.00 C07 | M-009668- RAB3A, member RAS       | 5864.00 RAB3A    | 4.77  | 0.13  | 0.04  |
| 50014.00 C08 | M-007661- phosphodiesterase 8f    | 8622.00 PDE8B    | 7.27  | 2.63  | 0.87  |
| 50014.00 C09 | M-008825- RAB3B, member RAS       | 5865.00 RAB3B    | 8.45  | 3.81  | 1.26  |
| 50014.00 C10 | M-003824- phosphodiesterase 8/    | 5151.00 PDE8A    | 8.72  | 4.08  | 1.35  |
| 50014.00 C11 | M-004009- RAB5A, member RAS       | 5868.00 RAB5A    | 7.89  | 3.25  | 1.08  |
| 50014.00 C12 | M-004581- pre-B-cell colony enh   | 10135.00 PBEF1   | 6.51  | 1.87  | 0.62  |
| 50014.00 C13 | M-004011- RAB5C, member RAS       | 5878.00 RAB5C    | 4.25  | 0.39  | -0.13 |
| 50014.00 C14 | M-012617- 2'-5'-oligoadenylate s  | 8638.00 OASL     | 3.79  | 0.85  | -0.28 |
| 50014.00 C15 | M-008975- RAB6A, member RAS       | 5870.00 RAB6A    | 2.94  | 1.70  | -0.56 |
| 50014.00 C16 | M-020126- mannosidase, alpha, c   | 10905.00 MAN1A2  | 4.40  | 0.24  | -0.08 |
| 50014.00 C17 | M-008548- RAB6B, member RAS       | 51560.00 RAB6B   | 8.13  | 3.49  | 1.15  |
| 50014.00 C18 | M-011939- zinc finger, FYVE dom   | 9372.00 ZFYVE9   | 3.04  | 1.60  | -0.53 |
| 50014.00 C19 | M-010388- RAB7A, member RAS       | 7879.00 RAB7A    | 8.62  | 3.98  | 1.31  |
| 50014.00 C20 | M-011127- latent transforming gl  | 4052.00 LTBP1    | 9.38  | 4.74  | 1.57  |
| 50014.00 C21 | M-010556- RAB7, member RAS o      | 8934.00 RAB7L1   | 11.21 | 6.57  | 2.17  |
| 50014.00 C23 | M-004177- RAB9A, member RAS       | 9367.00 RAB9A    | 3.78  | 0.86  | -0.28 |
| 50014.00 D02 | M-009625- axin 1                  | 8312.00 AXIN1    | 4.41  | 0.23  | -0.08 |
| 50014.00 D04 | M-010566- SH2B adaptor protein    | 10603.00 SH2B2   | 3.10  | 1.54  | -0.51 |
| 50014.00 D05 | M-010231- Rac/Cdc42 guanine ni    | 9459.00 ARHGEF6  | 1.93  | 2.71  | -0.90 |
| 50014.00 D06 | M-013308- apolipoprotein B48 re   | 55911.00 APOB48R | 4.73  | 0.09  | 0.03  |
| 50014.00 D07 | M-009616- Rho guanine nucleoti    | 8874.00 ARHGEF7  | 5.27  | 0.63  | 0.21  |
| 50014.00 D08 | M-010126- aryl hydrocarbon rece   | 23746.00 AIPL1   | 3.41  | 1.24  | -0.41 |
| 50014.00 D09 | M-012158- arginine-rich, mutater  | 7873.00 ARMET    | 2.71  | 1.93  | -0.64 |
| 50014.00 D10 | M-009337- aryl-hydrocarbon rece   | 57491.00 AHRR    | 4.43  | 0.21  | -0.07 |
| 50014.00 D11 | M-011469- breast cancer anti-est  | 8412.00 BCAR3    | 6.41  | 1.77  | 0.59  |
| 50014.00 D12 | M-003625- advanced glycosylatic   | 177.00 AGER      | 2.20  | 2.44  | -0.81 |
| 50014.00 D13 | M-020290- BCL2-like 13 (apoptos   | 23786.00 BCL2L13 | 12.02 | 7.38  | 2.44  |
| 50014.00 D14 | M-010178- vav 3 oncogene          | 10451.00 VAV3    | 12.51 | 7.87  | 2.60  |
| 50014.00 D15 | M-012207- ADP-ribosylation fact   | 10565.00 ARFGEF1 | 6.88  | 2.24  | 0.74  |
| 50014.00 D16 | M-017577- tumor necrosis factor   | 8740.00 TNFSF14  | 6.70  | 2.06  | 0.68  |
| 50014.00 D17 | M-011814- BCL2/adenovirus E1B     | 663.00 BNIP2     | 6.13  | 1.49  | 0.49  |
| 50014.00 D18 | M-003932- T-cell lymphoma inva    | 7074.00 TIAM1    | 11.15 | 6.51  | 2.15  |
| 50014.00 D19 | M-011002- complement compon       | 720.00 C4A       | 7.00  | 2.36  | 0.78  |
| 50014.00 D20 | M-016680- secretoglobin, family   | 7356.00 SCGB1A1  | 9.66  | 5.02  | 1.66  |
| 50014.00 D21 | M-012436- calcium binding tyrosi  | 26256.00 CABYR   | 7.91  | 3.27  | 1.08  |
| 50014.00 D23 | M-013446- nitric oxide synthase : | 9722.00 NOS1AP   | 4.35  | 0.29  | -0.10 |
| 50014.00 E02 | M-008021- lysyl oxidase-like 3    | 84695.00 LOXL3   | 2.73  | 1.91  | -0.63 |
| 50014.00 E04 | M-003302- interleukin-1 receptor  | 51135.00 IRAK4   | 4.50  | 0.14  | -0.05 |
| 50014.00 E05 | M-010353- RAN, member RAS on      | 5901.00 RAN      | 27.99 | 23.35 | 7.72  |
| 50014.00 E06 | M-005901- Indian hedgehog hom     | 3549.00 IHH      | 7.61  | 2.97  | 0.98  |
| 50014.00 E07 | M-011773- succinate dehydroger    | 6390.00 SDHB     | 8.75  | 4.11  | 1.36  |
| 50014.00 E08 | M-006650- hepatocyte growth fa    | 3082.00 HGF      | 7.88  | 3.24  | 1.07  |
| 50014.00 E09 | M-026181- thioredoxin domain c    | 23071.00 TXNDC4  | 8.80  | 4.16  | 1.37  |

|              |                                   |                   |       |       |       |
|--------------|-----------------------------------|-------------------|-------|-------|-------|
| 50014.00 E10 | M-004900- glucose phosphate isc   | 2821.00 GPI       | 14.19 | 9.55  | 3.16  |
| 50014.00 E11 | M-003961- WW domain containi      | 51741.00 WWOX     | 3.66  | 0.98  | -0.32 |
| 50014.00 E12 | M-003897- guanine nucleotide bi   | 2771.00 GNAI2     | 5.26  | 0.62  | 0.20  |
| 50014.00 E13 | M-010021- catalase                | 847.00 CAT        | 4.70  | 0.06  | 0.02  |
| 50014.00 E14 | M-010860- guanine nucleotide bi   | 2767.00 GNA11     | 12.85 | 8.21  | 2.72  |
| 50014.00 E15 | M-010009- eosinophil peroxidase   | 8288.00 EPX       | 6.24  | 1.60  | 0.53  |
| 50014.00 E16 | M-009568- FK506 binding proteir   | 2287.00 FKBP3     | 4.16  | 0.48  | -0.16 |
| 50014.00 E17 | M-011675- glutathione peroxidase  | 2877.00 GPX2      | 3.68  | 0.96  | -0.32 |
| 50014.00 E18 | M-009494- FK506 binding proteir   | 2280.00 FKBP1A    | 14.95 | 10.31 | 3.41  |
| 50014.00 E19 | M-011290- glutathione transferase | 2954.00 GSTZ1     | 12.76 | 8.12  | 2.68  |
| 50014.00 E20 | M-009907- fatty acid amide hydr   | 2166.00 FAAH      | 12.31 | 7.67  | 2.53  |
| 50014.00 E21 | M-010338- peroxiredoxin 1         | 5052.00 PRDX1     | 9.83  | 5.19  | 1.72  |
| 50014.00 E23 | M-008178- peroxiredoxin 2         | 7001.00 PRDX2     | 19.02 | 14.38 | 4.76  |
| 50014.00 F02 | M-008517- RAS guanyl releasing    | 25780.00 RASGRP3  | 2.32  | 2.32  | -0.77 |
| 50014.00 F04 | M-019268- pleckstrin homology,    | 9265.00 PSCD3     | 2.24  | 2.40  | -0.79 |
| 50014.00 F05 | M-017433- calpastatin             | 831.00 CAST       | 14.23 | 9.59  | 3.17  |
| 50014.00 F06 | M-006304- prolactin receptor      | 5618.00 PRLR      | 4.93  | 0.29  | 0.10  |
| 50014.00 F07 | M-010020- cystatin A (stefin A)   | 1475.00 CSTA      | 60.97 | 56.33 | 18.63 |
| 50014.00 F08 | M-009742- Rap guanine nucleotid   | 9693.00 RAPGEF2   | 5.18  | 0.54  | 0.18  |
| 50014.00 F09 | M-017240- cystatin B (stefin B)   | 1476.00 CSTB      | 8.01  | 3.37  | 1.11  |
| 50014.00 F10 | M-004608- neuregulin 1            | 3084.00 NRG1      | 2.95  | 1.69  | -0.56 |
| 50014.00 F11 | M-005281- dynein, light chain, LC | 8655.00 DYNLL1    | 5.87  | 1.23  | 0.41  |
| 50014.00 F12 | M-006440- fibroblast growth fact  | 10818.00 FRS2     | 7.62  | 2.98  | 0.98  |
| 50014.00 F13 | M-011253- dedicator of cytokine:  | 1793.00 DOCK1     | 4.34  | 0.30  | -0.10 |
| 50014.00 F14 | M-019915- dedicator of cytokine:  | 1794.00 DOCK2     | 4.19  | 0.45  | -0.15 |
| 50014.00 F15 | M-021495- estrogen receptor bin   | 9166.00 EBAG9     | 1.62  | 3.02  | -1.00 |
| 50014.00 F16 | M-004398- nucleotide-binding oli  | 10392.00 NOD1     | 4.91  | 0.27  | 0.09  |
| 50014.00 F17 | M-012435- F-box protein 8         | 26269.00 FBXO8    | 4.85  | 0.21  | 0.07  |
| 50014.00 F18 | M-008480- Rho guanine nucleotid   | 23365.00 ARHGEF12 | 6.67  | 2.03  | 0.67  |
| 50014.00 F19 | M-009877- Ral GEF with PH doma    | 55103.00 RALGPS2  | 3.09  | 1.55  | -0.51 |
| 50014.00 F20 | M-010360- Rho guanine nucleotid   | 9826.00 ARHGEF11  | 5.24  | 0.60  | 0.20  |
| 50014.00 F21 | M-011281- growth arrest-specific  | 2622.00 GAS8      | 6.16  | 1.52  | 0.50  |
| 50014.00 F23 | M-011286- GDP dissociation inhi   | 2664.00 GDI1      | 1.57  | 3.07  | -1.02 |
| 50014.00 G02 | M-005870- coagulation factor II ( | 2147.00 F2        | 7.15  | 2.51  | 0.83  |
| 50014.00 G04 | M-013298- EDAR-associated deal    | 128178.00 EDARADD | 10.09 | 5.45  | 1.80  |
| 50014.00 G05 | M-010355- peroxiredoxin 3         | 10935.00 PRDX3    | 4.18  | 0.46  | -0.15 |
| 50014.00 G06 | M-009281- endothelial cell growt  | 1890.00 ECGF1     | 8.63  | 3.99  | 1.32  |
| 50014.00 G07 | M-012204- peroxiredoxin 4         | 10549.00 PRDX4    | 5.53  | 0.89  | 0.29  |
| 50014.00 G08 | M-004070- dishevelled, dsh hom    | 1857.00 DVL3      | 5.11  | 0.47  | 0.15  |
| 50014.00 G09 | M-019173- peroxiredoxin 6         | 9588.00 PRDX6     | 4.00  | 0.64  | -0.21 |
| 50014.00 G10 | M-007880- chemokine (C-X-C mo     | 6372.00 CXCL6     | 14.58 | 9.94  | 3.29  |
| 50014.00 G11 | M-004556- prostaglandin-endope    | 5742.00 PTGS1     | 3.93  | 0.71  | -0.24 |
| 50014.00 G12 | M-005830- carboxypeptidase Z      | 8532.00 CPZ       | 7.95  | 3.31  | 1.10  |
| 50014.00 G13 | M-004557- prostaglandin-endope    | 5743.00 PTGS2     | 5.27  | 0.63  | 0.21  |

|              |                                  |                   |       |       |       |
|--------------|----------------------------------|-------------------|-------|-------|-------|
| 50014.00 G14 | M-003772- CASP8 and FADD-like    | 8837.00 CFLAR     | 11.17 | 6.53  | 2.16  |
| 50014.00 G15 | M-009089- thioredoxin reductase  | 10587.00 TXNRD2   | 24.50 | 19.86 | 6.57  |
| 50014.00 G16 | M-003466- caspase 8, apoptosis-  | 841.00 CASP8      | 9.59  | 4.95  | 1.64  |
| 50014.00 G17 | M-022772- peroxidasin homolog    | 7837.00 PXDN      | 8.85  | 4.21  | 1.39  |
| 50014.00 G18 | M-005805- calpain 3, (p94)       | 825.00 CAPN3      | 19.74 | 15.10 | 4.99  |
| 50014.00 G19 | M-008324- dual oxidase 2         | 50506.00 DUOX2    | 32.01 | 27.37 | 9.05  |
| 50014.00 G20 | M-005794- bone morphogenetic     | 649.00 BMP1       | 8.19  | 3.55  | 1.17  |
| 50014.00 G21 | M-009228- myeloperoxidase        | 4353.00 MPO       | 20.92 | 16.28 | 5.38  |
| 50014.00 G23 | M-009741- superoxide dismutase   | 6649.00 SOD3      | 9.82  | 5.18  | 1.71  |
| 50014.00 H02 | M-008966- Rho GTPase activating  | 392.00 ARHGAP1    | 4.66  | 0.02  | 0.01  |
| 50014.00 H04 | M-007806- angiotensin-like 3     | 27329.00 ANGPTL3  | 3.37  | 1.27  | -0.42 |
| 50014.00 H05 | M-010596- GDP dissociation inhib | 2665.00 GDI2      | 6.91  | 2.27  | 0.75  |
| 50014.00 H06 | M-010988- angiotensinogen (serp  | 183.00 AGT        | 12.45 | 7.81  | 2.58  |
| 50014.00 H07 | M-011044- GM2 ganglioside activ  | 2760.00 GM2A      | 2.47  | 2.17  | -0.72 |
| 50014.00 H08 | M-006355- myosin VI              | 4646.00 MYO6      | 10.65 | 6.01  | 1.99  |
| 50014.00 H09 | M-004329- G protein pathway su   | 2874.00 GPS2      | 4.79  | 0.15  | 0.05  |
| 50014.00 H10 | M-013160- myosin XVA             | 51168.00 MYO15A   | 2.12  | 2.52  | -0.83 |
| 50014.00 H11 | M-008426- Rho GTPase activating  | 23092.00 ARHGAP26 | 5.30  | 0.66  | 0.22  |
| 50014.00 H12 | M-012646- myosin, heavy chain 8  | 4626.00 MYH8      | 4.20  | 0.44  | -0.15 |
| 50014.00 H13 | M-012777- guanylate cyclase acti | 2981.00 GUCA2B    | 5.48  | 0.84  | 0.28  |
| 50014.00 H14 | M-011086- myosin, heavy chain 7  | 4625.00 MYH7      | 7.46  | 2.82  | 0.93  |
| 50014.00 H15 | M-010019- kalirin, RhoGEF kinase | 8997.00 KALRN     | 5.41  | 0.77  | 0.25  |
| 50014.00 H16 | M-008243- actin-like 6A          | 86.00 ACTL6A      | 7.35  | 2.71  | 0.90  |
| 50014.00 H17 | M-012962- protein phosphatase    | 80316.00 PPP1R2P9 | 2.10  | 2.54  | -0.84 |
| 50014.00 H18 | M-005273- optic atrophy 1 (auto  | 4976.00 OPA1      | 15.95 | 11.31 | 3.74  |
| 50014.00 H19 | M-011298- immunoglobulin (CD7    | 3476.00 IGBP1     | 17.95 | 13.31 | 4.40  |
| 50014.00 H20 | M-019330- myosin VIIA            | 4647.00 MYO7A     | 6.41  | 1.77  | 0.58  |
| 50014.00 H21 | M-009710- Rap guanine nucleotic  | 51195.00 RAPGEFL1 | 8.43  | 3.79  | 1.25  |
| 50014.00 H23 | M-014315- mitogen-activated pro  | 79109.00 MAPKAP1  | 4.00  | 0.64  | -0.21 |
| 50014.00 I02 | M-012664- acetylserotonin O-me   | 438.00 ASMT       | 1.23  | 3.41  | -1.13 |
| 50014.00 I04 | M-005787- type 1 tumor necrosis  | 51752.00 ARTS-1   | 3.78  | 0.86  | -0.28 |
| 50014.00 I05 | M-009863- thyroid peroxidase     | 7173.00 TPO       | 3.36  | 1.28  | -0.42 |
| 50014.00 I06 | M-008555- ras homolog gene fan   | 389.00 RHOC       | 4.05  | 0.59  | -0.20 |
| 50014.00 I07 | M-011804- annexin A3             | 306.00 ANXA3      | 5.83  | 1.19  | 0.39  |
| 50014.00 I08 | M-005775- ADAM metallopeptid     | 11096.00 ADAMTS5  | 23.85 | 19.21 | 6.35  |
| 50014.00 I09 | M-003309- caspase 9, apoptosis-  | 842.00 CASP9      | 3.85  | 0.79  | -0.26 |
| 50014.00 I10 | M-005764- ADAM metallopeptid     | 11093.00 ADAMTS13 | 5.29  | 0.65  | 0.21  |
| 50014.00 I11 | M-005867- coagulation factor X   | 2159.00 F10       | 1.81  | 2.83  | -0.94 |
| 50014.00 I12 | M-005761- ADAM metallopeptid     | 9510.00 ADAMTS1   | 9.06  | 4.42  | 1.46  |
| 50014.00 I13 | M-005956- matrix metallopeptid   | 4324.00 MMP15     | 7.84  | 3.20  | 1.06  |
| 50014.00 I14 | M-005760- ADAM-like, decysin 1   | 27299.00 ADAMDEC1 | 3.80  | 0.84  | -0.28 |
| 50014.00 I15 | M-005957- matrix metallopeptid   | 4325.00 MMP16     | 3.16  | 1.48  | -0.49 |
| 50014.00 I16 | M-010700- ADAM metallopeptid     | 8745.00 ADAM23    | 4.62  | 0.02  | -0.01 |
| 50014.00 I17 | M-005958- matrix metallopeptid   | 4326.00 MMP17     | 5.66  | 1.02  | 0.34  |



|              |                                   |                  |       |       |       |
|--------------|-----------------------------------|------------------|-------|-------|-------|
| 50014.00 I18 | M-009246- ADAM metallopeptid      | 53616.00 ADAM22  | 7.14  | 2.50  | 0.82  |
| 50014.00 I19 | M-005963- matrix metallopeptid    | 10893.00 MMP24   | 7.36  | 2.72  | 0.90  |
| 50014.00 I20 | M-010696- ADAM metallopeptid      | 2515.00 ADAM2    | 5.08  | 0.44  | 0.15  |
| 50014.00 I21 | M-009535- myosin IXB              | 4650.00 MYO9B    | 6.67  | 2.03  | 0.67  |
| 50014.00 I23 | M-010903- protein phosphatase     | 5511.00 PPP1R8   | 6.42  | 1.78  | 0.59  |
| 50014.00 J02 | M-019321- myosin VA (heavy cha    | 4644.00 MYO5A    | 1.59  | 3.05  | -1.01 |
| 50014.00 J04 | M-021478- myosin, light chain 7,  | 58498.00 MYL7    | 15.43 | 10.79 | 3.57  |
| 50014.00 J05 | M-013109- microtubule-associat    | 22924.00 MAPRE3  | 3.20  | 1.44  | -0.48 |
| 50014.00 J06 | M-021250- myosin, heavy chain 4   | 4622.00 MYH4     | 1.04  | 3.60  | -1.19 |
| 50014.00 J07 | M-003904- MCF.2 cell line derive  | 4168.00 MCF2     | 7.45  | 2.81  | 0.93  |
| 50014.00 J08 | M-012644- myosin, heavy chain 3   | 4621.00 MYH3     | 4.67  | 0.03  | 0.01  |
| 50014.00 J09 | M-003916- neurofibromin 1 (neu    | 4763.00 NF1      | 4.61  | 0.03  | -0.01 |
| 50014.00 J10 | M-006828- dynein, cytoplasmic 1   | 1778.00 DYNC1H1  | 1.75  | 2.89  | -0.96 |
| 50014.00 J11 | M-011742- ornithine decarboxyla   | 4947.00 OAZ2     | 2.13  | 2.51  | -0.83 |
| 50014.00 J12 | M-019964- dynein, light chain, Tc | 6993.00 DYNLT1   | 6.75  | 2.11  | 0.70  |
| 50014.00 J13 | M-013344- ornithine decarboxyla   | 51686.00 OAZ3    | 2.69  | 1.95  | -0.65 |
| 50014.00 J14 | M-019482- kinesin light chain 1   | 3831.00 KLC1     | 4.61  | 0.03  | -0.01 |
| 50014.00 J15 | M-009444- oligophrenin 1          | 4983.00 OPHN1    | 2.04  | 2.60  | -0.86 |
| 50014.00 J16 | M-016063- kinesin light chain 3   | 147700.00 KLC3   | 3.90  | 0.74  | -0.24 |
| 50014.00 J17 | M-008277- Rho GTPase activatin    | 9411.00 ARHGAP29 | 1.93  | 2.71  | -0.90 |
| 50014.00 J18 | M-014218- kinesin light chain 2   | 64837.00 KLC2    | 1.66  | 2.98  | -0.99 |
| 50014.00 J19 | M-017218- protein kinase (cAMP    | 11142.00 PKIG    | 7.32  | 2.68  | 0.89  |
| 50014.00 J20 | M-012574- dynein, cytoplasmic 1   | 1781.00 DYNC1I2  | 6.18  | 1.54  | 0.51  |
| 50014.00 J21 | M-018693- transmembrane prote     | 11070.00 TMEM115 | 4.56  | 0.08  | -0.03 |
| 50014.00 J23 | M-016215- phospholipase A2-act    | 9373.00 PLAA     | 2.68  | 1.96  | -0.65 |
| 50014.00 K02 | M-009399- ADAM metallopeptid      | 4185.00 ADAM11   | 14.19 | 9.55  | 3.16  |
| 50014.00 K04 | M-004503- ADAM metallopeptid      | 102.00 ADAM10    | 4.17  | 0.47  | -0.15 |
| 50014.00 K05 | M-004824- protein phosphatase     | 5520.00 PPP2R2A  | 17.81 | 13.17 | 4.35  |
| 50014.00 K06 | M-010561- abl interactor 2        | 10152.00 ABI2    | 9.27  | 4.63  | 1.53  |
| 50014.00 K07 | M-019459- protein phosphatase     | 28227.00 PPP2R3B | 19.23 | 14.59 | 4.82  |
| 50014.00 K08 | M-009085- phospholipase A2, gro   | 8398.00 PLA2G6   | 7.60  | 2.96  | 0.98  |
| 50014.00 K09 | M-019863- general transcription   | 9329.00 GTF3C4   | 4.20  | 0.44  | -0.15 |
| 50014.00 K10 | M-010284- patatin-like phospholi  | 50640.00 PNPLA8  | 5.14  | 0.50  | 0.16  |
| 50014.00 K11 | M-012628- BTAF1 RNA polymera      | 9044.00 BTAF1    | 11.56 | 6.92  | 2.29  |
| 50014.00 K12 | M-010271- patatin-like phospholi  | 8228.00 PNPLA4   | 12.86 | 8.22  | 2.72  |
| 50014.00 K13 | M-004034- enolase 1, (alpha)      | 2023.00 ENO1     | 9.41  | 4.77  | 1.58  |
| 50014.00 K14 | M-019376- serpin peptidase inhi   | 5054.00 SERPINE1 | 3.04  | 1.60  | -0.53 |
| 50014.00 K15 | M-003486- E1A binding protein p   | 2033.00 EP300    | 7.70  | 3.06  | 1.01  |
| 50014.00 K16 | M-010859- serpin peptidase inhi   | 5055.00 SERPINB2 | 5.08  | 0.44  | 0.15  |
| 50014.00 K17 | M-004888- excision repair cross-c | 2074.00 ERCC6    | 5.56  | 0.92  | 0.30  |
| 50014.00 K18 | M-013082- renin binding protein   | 5973.00 RENBP    | 3.41  | 1.23  | -0.41 |
| 50014.00 K19 | M-009643- ubiquitin-conjugating   | 55284.00 UBE2W   | 9.71  | 5.07  | 1.68  |
| 50014.00 K20 | M-010532- protein phosphatase     | 5506.00 PPP1R3A  | 5.99  | 1.35  | 0.45  |
| 50014.00 K21 | M-019646- general transcription   | 2962.00 GTF2F1   | 3.68  | 0.96  | -0.32 |



|              |                                   |           |          |       |       |       |
|--------------|-----------------------------------|-----------|----------|-------|-------|-------|
| 50014.00 K23 | M-010898- general transcription   | 2963.00   | GTF2F2   | 5.71  | 1.07  | 0.35  |
| 50014.00 L02 | M-019799- dynein, cytoplasmic 1   | 1780.00   | DYNC111  | 1.88  | 2.76  | -0.91 |
| 50014.00 L04 | M-012419- dynein, axonemal, int   | 27019.00  | DNAI1    | 9.35  | 4.71  | 1.56  |
| 50014.00 L05 | M-011917- protein phosphatase     | 6992.00   | PPP1R11  | 4.84  | 0.20  | 0.07  |
| 50014.00 L06 | M-006493- dynein, light chain, LC | 140735.00 | DYNLL2   | 1.77  | 2.87  | -0.95 |
| 50014.00 L07 | M-013547- protein phosphatase     | 4660.00   | PPP1R12B | 1.83  | 2.81  | -0.93 |
| 50014.00 L08 | M-012874- dynactin 1 (p150, gluc  | 1639.00   | DCTN1    | 1.77  | 2.87  | -0.95 |
| 50014.00 L09 | M-019589- protein phosphatase     | 5510.00   | PPP1R7   | 11.54 | 6.90  | 2.28  |
| 50014.00 L10 | M-013316- amyloid beta precursor  | 10513.00  | APPBP2   | 2.74  | 1.90  | -0.63 |
| 50014.00 L11 | M-019167- protein phosphatase     | 5522.00   | PPP2R2C  | 1.16  | 3.48  | -1.15 |
| 50014.00 L12 | M-012075- ARP1 actin-related pr   | 10120.00  | ACTR1B   | 5.57  | 0.93  | 0.31  |
| 50014.00 L13 | M-005214- protein phosphatase     | 5524.00   | PPP2R4   | 1.92  | 2.72  | -0.90 |
| 50014.00 L14 | M-009422- actin-like 6B           | 51412.00  | ACTL6B   | 6.22  | 1.58  | 0.52  |
| 50014.00 L15 | M-011926- pleckstrin homology,    | 9267.00   | PSCD1    | 6.88  | 2.24  | 0.74  |
| 50014.00 L16 | M-011567- actin, gamma 2, smoc    | 72.00     | ACTG2    | 2.67  | 1.97  | -0.65 |
| 50014.00 L17 | M-011925- pleckstrin homology,    | 9266.00   | PSCD2    | 1.99  | 2.65  | -0.88 |
| 50014.00 L18 | M-005265- actin, gamma 1          | 71.00     | ACTG1    | 2.40  | 2.24  | -0.74 |
| 50014.00 L19 | M-012254- proteasome (prosome)    | 5720.00   | PSME1    | 5.47  | 0.83  | 0.27  |
| 50014.00 L20 | M-012015- actin, alpha, cardiac n | 70.00     | ACTC1    | 2.43  | 2.21  | -0.73 |
| 50014.00 L21 | M-009321- ral guanine nucleotid   | 5863.00   | RGL2     | 2.30  | 2.34  | -0.77 |
| 50014.00 L23 | M-032255- RAB3 GTPase activati    | 25782.00  | RAB3GAP2 | 1.23  | 3.41  | -1.13 |
| 50014.00 M02 | M-005211- protein phosphatase     | 51400.00  | PPME1    | 2.66  | 1.98  | -0.65 |
| 50014.00 M04 | M-005075- pitrilysin metallopept  | 10531.00  | PITRM1   | 5.65  | 1.01  | 0.33  |
| 50014.00 M05 | M-003493- histone deacetylase 1   | 3065.00   | HDAC1    | 11.00 | 6.36  | 2.10  |
| 50014.00 M06 | M-007656- phosphodiesterase 6H    | 5149.00   | PDE6H    | 1.49  | 3.15  | -1.04 |
| 50014.00 M07 | M-004072- histone deacetylase 1   | 83933.00  | HDAC10   | 5.86  | 1.22  | 0.40  |
| 50014.00 M08 | M-007655- phosphodiesterase 6C    | 5148.00   | PDE6G    | 1.52  | 3.12  | -1.03 |
| 50014.00 M09 | M-003495- histone deacetylase 2   | 3066.00   | HDAC2    | 8.07  | 3.43  | 1.13  |
| 50014.00 M10 | M-009475- microsomal glutathio    | 4258.00   | MGST2    | 3.73  | 0.91  | -0.30 |
| 50014.00 M11 | M-003498- histone deacetylase 5   | 10014.00  | HDAC5    | 3.61  | 1.03  | -0.34 |
| 50014.00 M12 | M-011610- choroideremia-like (R   | 1122.00   | CHML     | 4.28  | 0.36  | -0.12 |
| 50014.00 M13 | M-009330- histone deacetylase 7   | 51564.00  | HDAC7A   | 0.94  | 3.70  | -1.22 |
| 50014.00 M14 | M-009414- choroideremia (Rab e    | 1121.00   | CHM      | 9.25  | 4.61  | 1.53  |
| 50014.00 M15 | M-005241- histone deacetylase 9   | 9734.00   | HDAC9    | 1.56  | 3.08  | -1.02 |
| 50014.00 M16 | M-013857- baculoviral IAP repeat  | 57448.00  | BIRC6    | 2.46  | 2.18  | -0.72 |
| 50014.00 M17 | M-009431- huntingtin interacting  | 3093.00   | HIP2     | 3.25  | 1.39  | -0.46 |
| 50014.00 M18 | M-009580- Rho GTPase activating   | 394.00    | ARHGAP5  | 1.20  | 3.44  | -1.14 |
| 50014.00 M19 | M-006301- HIV-1 Tat interacting   | 10524.00  | HTATIP   | 1.81  | 2.83  | -0.94 |
| 50014.00 M20 | M-019820- PET112-like (yeast)     | 5188.00   | PET112L  | 4.37  | 0.27  | -0.09 |
| 50014.00 M21 | M-017599- interleukin enhancer    | 3608.00   | ILF2     | 2.70  | 1.94  | -0.64 |
| 50014.00 M23 | M-019680- pre-B-cell leukemia h   | 5087.00   | PBX1     | 1.20  | 3.44  | -1.14 |
| 50014.00 N02 | M-003451- actin, beta             | 60.00     | ACTB     | 26.10 | 21.46 | 7.10  |
| 50014.00 N04 | M-003450- actin, alpha 2, smooth  | 59.00     | ACTA2    | 1.88  | 2.76  | -0.91 |
| 50014.00 N05 | M-005193- ral guanine nucleotid   | 5900.00   | RALGDS   | 3.75  | 0.89  | -0.29 |

|              |                                   |                  |       |       |       |
|--------------|-----------------------------------|------------------|-------|-------|-------|
| 50014.00 N06 | M-011194- actin, alpha 1, skeleta | 58.00 ACTA1      | 4.27  | 0.37  | -0.12 |
| 50014.00 N07 | M-006846- Ran GTPase activating   | 5905.00 RANGAP1  | 1.13  | 3.51  | -1.16 |
| 50014.00 N08 | M-013097- WAP four-disulfide co   | 58189.00 WFDC1   | 5.35  | 0.71  | 0.24  |
| 50014.00 N09 | M-019706- RAP1 GTPase activati    | 5909.00 RAP1GAP  | 4.37  | 0.27  | -0.09 |
| 50014.00 N10 | M-028294- Wiskott-Aldrich syndr   | 7454.00 WAS      | 8.45  | 3.81  | 1.26  |
| 50014.00 N11 | M-015881- RAP1, GTP-GDP disso     | 5910.00 RAP1GDS1 | 4.17  | 0.47  | -0.16 |
| 50014.00 N12 | M-011406- TIMP metallopeptida     | 7079.00 TIMP4    | 6.50  | 1.86  | 0.62  |
| 50014.00 N13 | M-005276- RAS p21 protein activ   | 5921.00 RASA1    | 4.39  | 0.25  | -0.08 |
| 50014.00 N14 | M-011111- TIMP metallopeptida     | 7078.00 TIMP3    | 3.74  | 0.90  | -0.30 |
| 50014.00 N15 | M-004333- RAS p21 protein activ   | 5922.00 RASA2    | 3.73  | 0.91  | -0.30 |
| 50014.00 N16 | M-011793- TIMP metallopeptida     | 7077.00 TIMP2    | 5.74  | 1.10  | 0.36  |
| 50014.00 N17 | M-009117- RAS p21 protein activ   | 22821.00 RASA3   | 2.62  | 2.02  | -0.67 |
| 50014.00 N18 | M-011792- TIMP metallopeptida     | 7076.00 TIMP1    | 3.79  | 0.85  | -0.28 |
| 50014.00 N19 | M-009411- RAS protein activator   | 9462.00 RASAL2   | 8.36  | 3.72  | 1.23  |
| 50014.00 N20 | M-019922- tissue factor pathway   | 7035.00 TFPI     | 4.84  | 0.20  | 0.07  |
| 50014.00 N21 | M-009323- Ras protein-specific g  | 5923.00 RASGRF1  | 12.22 | 7.58  | 2.50  |
| 50014.00 N23 | M-011474- reversion-inducing-cy   | 8434.00 RECK     | 3.52  | 1.12  | -0.37 |
| 50014.00 O02 | M-021336- eukaryotic translatior  | 1983.00 EIF5     | 3.24  | 1.40  | -0.46 |
| 50014.00 O04 | M-004208- eukaryotic translatior  | 8891.00 EIF2B3   | 4.49  | 0.15  | -0.05 |
| 50014.00 O05 | M-011746- pre-B-cell leukemia h   | 5089.00 PBX2     | 4.73  | 0.09  | 0.03  |
| 50014.00 O06 | M-021264- REX4, RNA exonuclea     | 57109.00 REXO4   | 2.75  | 1.89  | -0.62 |
| 50014.00 O07 | M-020121- pre-B-cell leukemia h   | 5090.00 PBX3     | 1.52  | 3.12  | -1.03 |
| 50014.00 O08 | M-010064- ubiquitin-conjugating   | 7335.00 UBE2V1   | 2.86  | 1.78  | -0.59 |
| 50014.00 O09 | M-012969- pre-B-cell leukemia h   | 80714.00 PBX4    | 8.32  | 3.68  | 1.22  |
| 50014.00 O10 | M-015316- transcription termina   | 8458.00 TTF2     | 2.84  | 1.80  | -0.60 |
| 50014.00 O11 | M-005055- p300/CBP-associated     | 8850.00 PCAF     | 4.62  | 0.02  | -0.01 |
| 50014.00 O12 | M-003549- tumor susceptibility g  | 7251.00 TSG101   | 1.57  | 3.07  | -1.02 |
| 50014.00 O13 | M-016286- methionine sulfoxide    | 22921.00 MSRB2   | 3.60  | 1.04  | -0.35 |
| 50014.00 O14 | M-003329- tumor protein p53       | 7157.00 TP53     | 2.56  | 2.08  | -0.69 |
| 50014.00 O15 | M-019109- peroxisomal prolifera   | 85441.00 PRIC285 | 9.45  | 4.81  | 1.59  |
| 50014.00 O16 | M-012847- NMDA receptor regul     | 80155.00 NARG1   | 1.25  | 3.39  | -1.12 |
| 50014.00 O17 | M-007772- recombination signal    | 3516.00 RBPJ     | 1.58  | 3.06  | -1.01 |
| 50014.00 O18 | M-010540- suppressor of Ty 6 ho   | 6830.00 SUPT6H   | 1.65  | 2.99  | -0.99 |
| 50014.00 O19 | M-017253- SWI/SNF related, mat    | 6595.00 SMARCA2  | 0.77  | 3.87  | -1.28 |
| 50014.00 O20 | M-004830- Snf2-related CBP activ  | 10847.00 SRCAP   | 0.25  | 4.39  | -1.45 |
| 50014.00 O21 | M-010431- SWI/SNF related, mat    | 6597.00 SMARCA4  | 0.68  | 3.96  | -1.31 |
| 50014.00 O23 | M-011478- SWI/SNF related, mat    | 8467.00 SMARCA5  | 1.02  | 3.62  | -1.20 |
| 50014.00 P02 | M-010216- serine peptidase inhi   | 10653.00 SPINT2  | 18.32 | 13.68 | 4.52  |
| 50014.00 P04 | M-012327- serine peptidase inhi   | 11005.00 SPINK5  | 9.00  | 4.36  | 1.44  |
| 50014.00 P05 | M-008387- ral guanine nucleotid   | 23179.00 RGL1    | 5.18  | 0.54  | 0.18  |
| 50014.00 P06 | M-019724- serine peptidase inhi   | 6690.00 SPINK1   | 7.99  | 3.35  | 1.11  |
| 50014.00 P07 | M-008607- Ral-GDS related prote   | 266747.00 Rgr    | 3.54  | 1.10  | -0.36 |
| 50014.00 P08 | M-005195- son of sevenless hom    | 6655.00 SOS2     | 2.75  | 1.89  | -0.63 |
| 50014.00 P09 | M-016048- ribonuclease/angioge    | 6050.00 RNH1     | 5.85  | 1.21  | 0.40  |

|              |                                             |                    |       |      |       |
|--------------|---------------------------------------------|--------------------|-------|------|-------|
| 50014.00 P10 | M-011391- secretory leukocyte p             | 6590.00 SLPI       | 4.48  | 0.16 | -0.05 |
| 50014.00 P11 | M-021066- serpin peptidase inhi             | 51156.00 SERPINA10 | 10.45 | 5.81 | 1.92  |
| 50014.00 P12 | M-019971- SH2 domain containir              | 10044.00 SH2D3C    | 1.35  | 3.29 | -1.09 |
| 50014.00 P13 | M-015832- serpin peptidase inhi             | 5104.00 SERPINA5   | 3.11  | 1.53 | -0.51 |
| 50014.00 P14 | M-012246- serpin peptidase inhi             | 5276.00 SERPINI2   | 3.10  | 1.54 | -0.51 |
| 50014.00 P15 | M-016240- serpin peptidase inhi             | 1992.00 SERPINB1   | 3.63  | 1.01 | -0.34 |
| 50014.00 P16 | M-019901- serpin peptidase inhi             | 5274.00 SERPINI1   | 4.55  | 0.09 | -0.03 |
| 50014.00 P17 | M-015331- serpin peptidase inhi             | 5275.00 SERPINB13  | 6.52  | 1.88 | 0.62  |
| 50014.00 P18 | M-010999- serpin peptidase inhi             | 710.00 SERPING1    | 3.53  | 1.11 | -0.37 |
| 50014.00 P19 | M-012768- serpin peptidase inhi             | 6317.00 SERPINB3   | 2.39  | 2.25 | -0.75 |
| 50014.00 P20 | M-010153- serpin peptidase inhi             | 5176.00 SERPINF1   | 1.96  | 2.68 | -0.89 |
| 50014.00 P21 | M-012596- serpin peptidase inhi             | 6318.00 SERPINB4   | 4.67  | 0.03 | 0.01  |
| 50014.00 P23 | M-019684- serpin peptidase inhi             | 5268.00 SERPINB5   | 2.56  | 2.08 | -0.69 |
|              |                                             | mdn                | 4.64  | 2.04 |       |
|              |                                             | 3xMAD              |       | 6.13 |       |
|              |                                             | MADc               |       | 3.02 |       |
| 50014.00 C22 |                                             |                    | 26.08 |      | 19.28 |
| 50014.00 D22 |                                             |                    | 28.86 |      | 22.48 |
| 50014.00 E22 |                                             |                    | 26.63 |      | 17.50 |
| 50014.00 F22 |                                             |                    | 25.17 |      | 22.01 |
|              |                                             | mn                 | 26.68 |      | 20.32 |
|              |                                             | sd                 | 1.57  |      | 2.35  |
| 50014.00 G22 |                                             |                    | 5.71  |      | 1.38  |
| 50014.00 H22 |                                             | 20.13              |       |      | 4.79  |
| 50014.00 I22 |                                             |                    | 6.92  |      | 3.24  |
| 50014.00 J22 |                                             |                    | 0.67  |      | 1.85  |
|              |                                             | mn                 | 4.43  |      | 2.81  |
|              |                                             | sd                 | 3.32  |      | 1.54  |
|              |                                             | 3psSD              | 4.71  |      | 7.05  |
|              |                                             | 3ngSD              | 9.96  |      | 4.61  |
|              |                                             | SumSD              | 14.67 |      | 11.66 |
|              |                                             | DiffMn             | 22.25 |      | 17.50 |
|              |                                             | SmovrDiff          | 0.66  |      | 0.67  |
|              |                                             | 1minus             | 0.34  |      | 0.33  |
| 50014.00 G03 | M-003290- polo-like kinase 1 (Dro           | 5347.00 PLK1 SMART | 28.96 |      | 6.90  |
| 50014.00 H03 | M-003290- polo-like kinase 1 (Dro           | 5347.00            | 23.47 |      | 4.55  |
| 50014.00 I03 | D-001206-: siControl non-targeting siRNA #2 |                    | 5.78  |      | 1.26  |
| 50014.00 J03 | D-001206-: siControl non-targeting siRNA #2 |                    | 4.33  |      | 1.94  |
| 50014.00 K03 | D-001600-( siGLO RISC-free siRNA            |                    | 9.98  |      | 10.43 |
| 50014.00 L03 | D-001600-( siGLO RISC-free siRNA            |                    | 10.72 |      | 8.52  |

| <b>% inf</b> | <b>abs dev</b> | <b>robust Z</b> | <b>% inf</b> | <b>abs dev</b> | <b>robust Z</b> |   |             |
|--------------|----------------|-----------------|--------------|----------------|-----------------|---|-------------|
| 20.69        | 17.46          | 6.80            | 10.56        | 6.48           | 2.21            | x | toxic a,b,c |
| 2.38         | 0.85           | -0.33           | 3.14         | 0.94           | -0.32           |   |             |
| 1.66         | 1.57           | -0.61           | 4.20         | 0.12           | 0.04            |   |             |
| 3.36         | 0.13           | 0.05            | 3.96         | 0.12           | -0.04           |   |             |
| 8.37         | 5.14           | 2.00            | 13.43        | 9.35           | 3.19            | x | toxic a,b,c |
| 2.94         | 0.29           | -0.11           | 4.80         | 0.72           | 0.24            |   |             |
| 3.66         | 0.43           | 0.17            | 5.16         | 1.08           | 0.37            |   |             |
| 1.68         | 1.55           | -0.60           | 4.06         | 0.02           | 0.00            |   |             |
| 5.15         | 1.92           | 0.75            | 7.00         | 2.92           | 1.00            |   |             |
| 1.54         | 1.69           | -0.66           | 2.92         | 1.16           | -0.40           |   |             |
| 1.86         | 1.37           | -0.53           | 7.20         | 3.12           | 1.06            |   |             |
| 7.76         | 4.53           | 1.76            | 13.26        | 9.18           | 3.14            |   |             |
| 2.34         | 0.89           | -0.34           | 4.96         | 0.88           | 0.30            |   |             |
| 4.36         | 1.13           | 0.44            | 10.35        | 6.27           | 2.14            |   |             |
| 3.32         | 0.09           | 0.04            | 19.49        | 15.41          | 5.26            |   |             |
| 0.99         | 2.24           | -0.87           | 19.32        | 15.24          | 5.20            |   |             |
| 3.31         | 0.08           | 0.03            | 14.72        | 10.64          | 3.63            |   |             |
| 4.70         | 1.47           | 0.57            | 15.77        | 11.69          | 3.99            |   |             |
| 4.50         | 1.27           | 0.50            | 9.70         | 5.62           | 1.92            |   |             |
| 12.94        | 9.71           | 3.78            | 21.33        | 17.25          | 5.89            | x | toxic a,b,c |
| 11.74        | 8.51           | 3.32            | 13.33        | 9.25           | 3.16            | x | toxic a,b,c |
| 3.06         | 0.17           | -0.06           | 8.08         | 4.00           | 1.37            |   |             |
| 2.14         | 1.09           | -0.43           | 4.38         | 0.30           | 0.10            |   |             |
| 2.57         | 0.66           | -0.26           | 3.42         | 0.66           | -0.22           |   |             |
| 2.28         | 0.95           | -0.37           | 9.58         | 5.50           | 1.88            |   |             |
| 0.80         | 2.43           | -0.95           | 2.37         | 1.71           | -0.58           |   |             |
| 1.03         | 2.20           | -0.86           | 1.20         | 2.88           | -0.98           |   |             |
| 0.74         | 2.49           | -0.97           | 4.22         | 0.14           | 0.05            |   |             |
| 5.17         | 1.94           | 0.76            | 4.09         | 0.01           | 0.00            |   |             |
| 0.94         | 2.29           | -0.89           | 2.94         | 1.14           | -0.39           |   |             |
| 1.49         | 1.74           | -0.68           | 3.54         | 0.54           | -0.18           |   |             |
| 0.16         | 3.07           | -1.19           | 6.43         | 2.35           | 0.80            |   |             |
| 1.68         | 1.55           | -0.60           | 6.09         | 2.01           | 0.69            |   |             |
| 0.11         | 3.12           | -1.21           | 2.21         | 1.87           | -0.64           |   |             |
| 2.79         | 0.44           | -0.17           | 4.12         | 0.04           | 0.01            |   |             |
| 1.77         | 1.46           | -0.57           | 7.30         | 3.22           | 1.10            |   |             |
| 1.30         | 1.93           | -0.75           | 5.50         | 1.42           | 0.49            |   |             |
| 0.25         | 2.98           | -1.16           | 5.73         | 1.65           | 0.57            |   |             |
| 1.16         | 2.07           | -0.81           | 8.53         | 4.45           | 1.52            |   |             |
| 2.35         | 0.88           | -0.34           | 19.75        | 15.67          | 5.35            |   |             |
| 1.77         | 1.46           | -0.57           | 2.10         | 1.98           | -0.68           |   |             |
| 2.31         | 0.92           | -0.36           | 1.48         | 2.60           | -0.89           |   |             |
| 0.90         | 2.33           | -0.91           | 1.21         | 2.87           | -0.98           |   |             |

|      |      |       |      |      |       |
|------|------|-------|------|------|-------|
| 2.70 | 0.53 | -0.21 | 1.61 | 2.47 | -0.84 |
| 1.57 | 1.66 | -0.64 | 1.25 | 2.83 | -0.97 |
| 4.79 | 1.56 | 0.61  | 4.02 | 0.06 | -0.02 |
| 3.91 | 0.68 | 0.27  | 2.59 | 1.49 | -0.51 |
| 3.52 | 0.29 | 0.11  | 0.97 | 3.11 | -1.06 |
| 3.47 | 0.24 | 0.09  | 3.53 | 0.55 | -0.19 |
| 1.84 | 1.39 | -0.54 | 1.42 | 2.66 | -0.91 |
| 1.54 | 1.69 | -0.66 | 0.89 | 3.19 | -1.09 |
| 4.23 | 1.00 | 0.39  | 0.13 | 3.95 | -1.35 |
| 2.98 | 0.25 | -0.10 | 1.79 | 2.29 | -0.78 |
| 0.98 | 2.25 | -0.88 | 1.45 | 2.63 | -0.90 |
| 3.21 | 0.02 | 0.00  | 2.64 | 1.44 | -0.49 |
| 2.51 | 0.72 | -0.28 | 0.91 | 3.17 | -1.08 |
| 4.58 | 1.35 | 0.53  | 0.99 | 3.09 | -1.06 |
| 1.61 | 1.62 | -0.63 | 0.79 | 3.29 | -1.12 |
| 3.55 | 0.32 | 0.12  | 3.40 | 0.68 | -0.23 |
| 2.70 | 0.53 | -0.21 | 3.47 | 0.61 | -0.21 |
| 0.99 | 2.24 | -0.87 | 0.26 | 3.82 | -1.30 |
| 0.48 | 2.75 | -1.07 | 1.78 | 2.30 | -0.78 |
| 2.30 | 0.93 | -0.36 | 1.34 | 2.74 | -0.94 |
| 2.52 | 0.71 | -0.28 | 4.60 | 0.52 | 0.18  |
| 3.51 | 0.28 | 0.11  | 1.73 | 2.35 | -0.80 |
| 3.07 | 0.16 | -0.06 | 0.94 | 3.14 | -1.07 |
| 1.83 | 1.40 | -0.54 | 0.96 | 3.12 | -1.07 |
| 3.44 | 0.21 | 0.08  | 0.91 | 3.17 | -1.08 |
| 8.21 | 4.98 | 1.94  | 2.62 | 1.46 | -0.50 |
| 1.60 | 1.63 | -0.64 | 0.65 | 3.43 | -1.17 |
| 4.88 | 1.65 | 0.64  | 8.83 | 4.75 | 1.62  |
| 5.85 | 2.62 | 1.02  | 7.50 | 3.42 | 1.17  |
| 3.88 | 0.65 | 0.26  | 3.55 | 0.53 | -0.18 |
| 1.77 | 1.46 | -0.57 | 2.39 | 1.69 | -0.58 |
| 6.16 | 2.93 | 1.14  | 4.76 | 0.68 | 0.23  |
| 5.66 | 2.43 | 0.95  | 6.23 | 2.15 | 0.73  |
| 5.70 | 2.47 | 0.96  | 2.12 | 1.96 | -0.67 |
| 2.83 | 0.40 | -0.15 | 1.83 | 2.25 | -0.77 |
| 7.51 | 4.28 | 1.67  | 2.81 | 1.27 | -0.43 |
| 5.75 | 2.52 | 0.98  | 1.18 | 2.90 | -0.99 |
| 1.14 | 2.09 | -0.81 | 0.82 | 3.26 | -1.11 |
| 1.50 | 1.73 | -0.67 | 2.62 | 1.46 | -0.50 |
| 1.26 | 1.97 | -0.77 | 4.35 | 0.27 | 0.09  |
| 3.77 | 0.54 | 0.21  | 3.41 | 0.67 | -0.23 |
| 4.77 | 1.54 | 0.60  | 1.53 | 2.55 | -0.87 |
| 2.22 | 1.01 | -0.39 | 1.40 | 2.68 | -0.91 |
| 2.31 | 0.92 | -0.36 | 3.63 | 0.45 | -0.15 |

|             |              |       |              |              |       |   |             |
|-------------|--------------|-------|--------------|--------------|-------|---|-------------|
| 12.37       | <b>9.14</b>  | 3.56  | 16.76        | <b>12.68</b> | 4.33  | x | toxic a,b,c |
| 4.53        | 1.30         | 0.51  | 3.71         | 0.37         | -0.12 |   |             |
| 3.43        | 0.20         | 0.08  | 2.26         | 1.82         | -0.62 |   |             |
| 4.51        | 1.28         | 0.50  | 6.91         | 2.83         | 0.97  |   |             |
| 5.14        | 1.91         | 0.74  | 8.95         | 4.87         | 1.66  |   |             |
| 4.47        | 1.24         | 0.48  | 3.82         | 0.26         | -0.09 |   |             |
| 3.13        | 0.10         | -0.04 | 1.34         | 2.74         | -0.94 |   |             |
| 3.05        | 0.18         | -0.07 | 7.12         | 3.04         | 1.04  |   |             |
| 9.32        | <b>6.09</b>  | 2.37  | 13.97        | <b>9.89</b>  | 3.38  | x | toxic a,b,c |
| 6.74        | 3.51         | 1.37  | 8.52         | 4.44         | 1.52  |   |             |
| 9.75        | <b>6.52</b>  | 2.54  | 11.58        | <b>7.50</b>  | 2.56  | x | toxic a,b,c |
| <b>8.46</b> | <b>5.23</b>  | 2.04  | <b>12.64</b> | <b>8.56</b>  | 2.92  | y |             |
| 3.66        | 0.43         | 0.17  | 3.67         | 0.41         | -0.14 |   |             |
| 0.90        | 2.33         | -0.91 | 3.63         | 0.45         | -0.15 |   |             |
| 0.38        | 2.85         | -1.11 | 4.27         | 0.19         | 0.06  |   |             |
| 2.24        | 0.99         | -0.38 | 3.52         | 0.56         | -0.19 |   |             |
| 2.78        | 0.45         | -0.17 | 2.22         | 1.86         | -0.63 |   |             |
| 19.29       | <b>16.06</b> | 6.26  | 50.36        | <b>46.28</b> | 15.80 | x | toxic a,b,c |
| 1.50        | 1.73         | -0.67 | 5.18         | 1.10         | 0.38  |   |             |
| 3.44        | 0.21         | 0.08  | 4.10         | 0.02         | 0.01  |   |             |
| 7.54        | 4.31         | 1.68  | 4.53         | 0.45         | 0.15  |   |             |
| 4.97        | 1.74         | 0.68  | 7.65         | 3.57         | 1.22  |   |             |
| 3.10        | 0.13         | -0.05 | 13.98        | <b>9.90</b>  | 3.38  |   |             |
| 2.33        | 0.90         | -0.35 | 4.73         | 0.65         | 0.22  |   |             |
| 1.33        | 1.90         | -0.74 | 3.49         | 0.59         | -0.20 |   |             |
| 1.30        | 1.93         | -0.75 | 3.41         | 0.67         | -0.23 |   |             |
| 0.97        | 2.26         | -0.88 | 9.61         | 5.53         | 1.89  |   |             |
| 4.57        | 1.34         | 0.52  | 4.93         | 0.85         | 0.29  |   |             |
| 5.60        | 2.37         | 0.93  | 12.39        | <b>8.31</b>  | 2.84  |   |             |
| 3.76        | 0.53         | 0.21  | 5.49         | 1.41         | 0.48  |   |             |
| 5.23        | 2.00         | 0.78  | 5.81         | 1.73         | 0.59  |   |             |
| 3.57        | 0.34         | 0.13  | 6.51         | 2.43         | 0.83  |   |             |
| 2.01        | 1.22         | -0.47 | 3.50         | 0.58         | -0.20 |   |             |
| 0.62        | 2.61         | -1.02 | 2.51         | 1.57         | -0.53 |   |             |
| 5.96        | 2.73         | 1.07  | 4.35         | 0.27         | 0.09  |   |             |
| 2.55        | 0.68         | -0.26 | 1.50         | 2.58         | -0.88 |   |             |
| 2.23        | 1.00         | -0.39 | 5.47         | 1.39         | 0.48  |   |             |
| 1.60        | 1.63         | -0.64 | 3.35         | 0.73         | -0.25 |   |             |
| 1.63        | 1.60         | -0.62 | 3.59         | 0.49         | -0.17 |   |             |
| 2.56        | 0.67         | -0.26 | 3.42         | 0.66         | -0.23 |   |             |
| 7.23        | 4.00         | 1.56  | 10.72        | <b>6.64</b>  | 2.27  | x | toxic a     |
| 0.93        | 2.30         | -0.89 | 4.22         | 0.14         | 0.05  |   |             |
| 1.98        | 1.25         | -0.49 | 3.69         | 0.39         | -0.13 |   |             |
| 2.23        | 1.00         | -0.39 | 4.82         | 0.74         | 0.25  |   |             |

|      |      |       |       |       |        |           |
|------|------|-------|-------|-------|--------|-----------|
| 4.38 | 1.15 | 0.45  | 13.99 | 9.91  | 3.38 x | toxic a   |
| 7.24 | 4.01 | 1.56  | 5.48  | 1.40  | 0.48   |           |
| 3.89 | 0.66 | 0.26  | 7.42  | 3.34  | 1.14   |           |
| 2.79 | 0.44 | -0.17 | 1.67  | 2.41  | -0.82  |           |
| 4.84 | 1.61 | 0.63  | 7.30  | 3.22  | 1.10   |           |
| 3.89 | 0.66 | 0.26  | 12.57 | 8.49  | 2.90 x | toxic a,b |
| 2.64 | 0.59 | -0.23 | 2.21  | 1.87  | -0.64  |           |
| 0.74 | 2.49 | -0.97 | 5.28  | 1.20  | 0.41   |           |
| 2.57 | 0.66 | -0.26 | 5.15  | 1.07  | 0.37   |           |
| 1.14 | 2.09 | -0.81 | 3.50  | 0.58  | -0.20  |           |
| 3.18 | 0.05 | -0.02 | 7.43  | 3.35  | 1.15   |           |
| 3.01 | 0.22 | -0.08 | 8.32  | 4.24  | 1.45   |           |
| 0.50 | 2.73 | -1.06 | 6.00  | 1.92  | 0.66   |           |
| 1.22 | 2.01 | -0.78 | 2.40  | 1.68  | -0.57  |           |
| 4.81 | 1.58 | 0.62  | 11.27 | 7.19  | 2.46   |           |
| 0.57 | 2.66 | -1.03 | 3.37  | 0.71  | -0.24  |           |
| 2.16 | 1.07 | -0.41 | 2.77  | 1.31  | -0.45  |           |
| 2.39 | 0.84 | -0.33 | 6.81  | 2.73  | 0.93   |           |
| 2.62 | 0.61 | -0.24 | 4.87  | 0.79  | 0.27   |           |
| 1.48 | 1.75 | -0.68 | 4.75  | 0.67  | 0.23   |           |
| 1.30 | 1.93 | -0.75 | 2.03  | 2.05  | -0.70  |           |
| 3.56 | 0.33 | 0.13  | 5.51  | 1.43  | 0.49   |           |
| 4.22 | 0.99 | 0.39  | 3.05  | 1.03  | -0.35  |           |
| 1.06 | 2.17 | -0.84 | 2.21  | 1.87  | -0.64  |           |
| 6.68 | 3.45 | 1.34  | 3.18  | 0.90  | -0.31  |           |
| 8.64 | 5.41 | 2.11  | 6.91  | 2.83  | 0.97 x | toxic a   |
| 5.98 | 2.75 | 1.07  | 6.38  | 2.30  | 0.79   |           |
| 6.81 | 3.58 | 1.40  | 9.29  | 5.21  | 1.78   |           |
| 5.92 | 2.69 | 1.05  | 3.67  | 0.41  | -0.14  |           |
| 0.73 | 2.50 | -0.97 | 0.46  | 3.62  | -1.24  |           |
| 3.08 | 0.15 | -0.06 | 2.56  | 1.52  | -0.52  |           |
| 2.88 | 0.35 | -0.13 | 2.11  | 1.97  | -0.67  |           |
| 0.66 | 2.57 | -1.00 | 4.79  | 0.71  | 0.24   |           |
| 1.25 | 1.98 | -0.77 | 1.77  | 2.31  | -0.79  |           |
| 0.06 | 3.17 | -1.24 | 1.65  | 2.43  | -0.83  |           |
| 0.67 | 2.56 | -1.00 | 3.69  | 0.39  | -0.13  |           |
| 2.97 | 0.26 | -0.10 | 7.80  | 3.72  | 1.27   |           |
| 1.21 | 2.02 | -0.79 | 6.00  | 1.92  | 0.66   |           |
| 2.28 | 0.95 | -0.37 | 15.27 | 11.19 | 3.82   |           |
| 1.23 | 2.00 | -0.78 | 28.30 | 24.22 | 8.27   |           |
| 2.00 | 1.23 | -0.48 | 8.40  | 4.32  | 1.47   |           |
| 2.01 | 1.22 | -0.47 | 2.35  | 1.73  | -0.59  |           |
| 5.70 | 2.47 | 0.96  | 8.53  | 4.45  | 1.52   |           |
| 0.24 | 2.99 | -1.16 | 10.81 | 6.73  | 2.30   |           |

|              |              |       |              |              |        |
|--------------|--------------|-------|--------------|--------------|--------|
| 2.49         | 0.74         | -0.29 | 11.41        | 7.33         | 2.50   |
| 1.29         | 1.94         | -0.76 | 10.78        | 6.70         | 2.29   |
| 0.49         | 2.74         | -1.07 | 7.21         | 3.13         | 1.07   |
| 0.79         | 2.44         | -0.95 | 5.03         | 0.95         | 0.33   |
| 0.48         | 2.75         | -1.07 | 6.73         | 2.65         | 0.91   |
| 1.34         | 1.89         | -0.74 | 2.47         | 1.61         | -0.55  |
| 1.55         | 1.68         | -0.65 | 5.01         | 0.93         | 0.32   |
| 0.78         | 2.45         | -0.95 | 2.35         | 1.73         | -0.59  |
| 0.28         | 2.95         | -1.15 | 1.51         | 2.57         | -0.88  |
| 4.92         | 1.69         | 0.66  | 13.47        | 9.39         | 3.20   |
| 4.38         | 1.15         | 0.45  | 5.89         | 1.81         | 0.62   |
| 2.01         | 1.22         | -0.47 | 6.54         | 2.46         | 0.84   |
| 1.09         | 2.14         | -0.83 | 2.61         | 1.47         | -0.50  |
| 0.63         | 2.61         | -1.01 | 3.06         | 1.02         | -0.35  |
| 1.68         | 1.55         | -0.60 | 7.04         | 2.96         | 1.01   |
| 0.75         | 2.48         | -0.97 | 2.54         | 1.54         | -0.52  |
| 3.32         | 0.09         | 0.04  | 7.19         | 3.11         | 1.06   |
| 2.62         | 0.61         | -0.24 | 4.39         | 0.31         | 0.11   |
| 4.93         | 1.70         | 0.66  | 5.26         | 1.18         | 0.40   |
| 1.27         | 1.96         | -0.76 | 4.65         | 0.57         | 0.19   |
| 1.56         | 1.67         | -0.65 | 5.35         | 1.27         | 0.43   |
| 1.61         | 1.62         | -0.63 | 4.78         | 0.70         | 0.24   |
| 2.35         | 0.88         | -0.34 | 12.22        | 8.14         | 2.78   |
| 0.98         | 2.25         | -0.88 | 5.26         | 1.18         | 0.40   |
| 5.30         | 2.07         | 0.81  | 7.39         | 3.31         | 1.13   |
| 3.17         | 0.06         | -0.02 | 3.74         | 0.34         | -0.11  |
| 3.69         | 0.46         | 0.18  | 2.65         | 1.43         | -0.49  |
| <u>15.17</u> | <b>11.94</b> | 4.65  | 8.86         | 4.78         | 1.63 y |
| 14.31        | <b>11.08</b> | 4.32  | 5.73         | 1.65         | 0.56   |
| 4.47         | 1.24         | 0.48  | 3.47         | 0.61         | -0.21  |
| 2.74         | 0.49         | -0.19 | 6.80         | 2.72         | 0.93   |
| 3.21         | 0.02         | -0.01 | 8.35         | 4.27         | 1.46   |
| 3.48         | 0.25         | 0.10  | 4.72         | 0.64         | 0.22   |
| 5.74         | 2.51         | 0.98  | 2.31         | 1.77         | -0.61  |
| <b>7.10</b>  | <b>3.87</b>  | 1.51  | <b>16.37</b> | <b>12.29</b> | 4.20 y |
| 4.72         | 1.49         | 0.58  | 8.88         | 4.80         | 1.64   |
| 2.49         | 0.74         | -0.29 | 7.27         | 3.19         | 1.09   |
| 3.51         | 0.28         | 0.11  | 2.46         | 1.63         | -0.55  |
| 0.70         | 2.53         | -0.98 | 1.67         | 2.41         | -0.82  |
| 4.90         | 1.67         | 0.65  | 3.25         | 0.83         | -0.28  |
| 3.00         | 0.23         | -0.09 | 1.87         | 2.21         | -0.75  |
| 5.46         | 2.23         | 0.87  | 5.20         | 1.12         | 0.38   |
| 7.93         | 4.70         | 1.83  | 5.41         | 1.33         | 0.45   |
| 4.06         | 0.83         | 0.32  | 1.95         | 2.13         | -0.73  |



|       |      |       |      |      |       |
|-------|------|-------|------|------|-------|
| 6.04  | 2.81 | 1.10  | 5.07 | 0.99 | 0.34  |
| 4.03  | 0.80 | 0.31  | 0.77 | 3.31 | -1.13 |
| 3.34  | 0.11 | 0.04  | 2.10 | 1.98 | -0.67 |
| 3.83  | 0.60 | 0.24  | 1.35 | 2.73 | -0.93 |
| 5.33  | 2.10 | 0.82  | 1.27 | 2.81 | -0.96 |
| 2.46  | 0.77 | -0.30 | 0.64 | 3.44 | -1.17 |
| 3.15  | 0.08 | -0.03 | 0.76 | 3.32 | -1.13 |
| 3.97  | 0.74 | 0.29  | 3.33 | 0.75 | -0.26 |
| 4.93  | 1.70 | 0.66  | 0.69 | 3.39 | -1.16 |
| 3.93  | 0.70 | 0.27  | 1.48 | 2.60 | -0.89 |
| 4.73  | 1.50 | 0.59  | 2.24 | 1.84 | -0.63 |
| 1.83  | 1.40 | -0.54 | 1.67 | 2.41 | -0.82 |
| 5.05  | 1.82 | 0.71  | 3.12 | 0.96 | -0.33 |
| 4.62  | 1.39 | 0.54  | 2.43 | 1.65 | -0.56 |
| 3.78  | 0.55 | 0.22  | 4.24 | 0.16 | 0.05  |
| 3.97  | 0.74 | 0.29  | 0.82 | 3.26 | -1.11 |
| 10.80 | 7.57 | 2.95  | 1.48 | 2.60 | -0.89 |
| 3.56  | 0.33 | 0.13  | 4.37 | 0.29 | 0.10  |
| 3.01  | 0.22 | -0.09 | 0.60 | 3.48 | -1.19 |
| 3.85  | 0.62 | 0.24  | 1.02 | 3.06 | -1.05 |
| 4.75  | 1.52 | 0.59  | 4.53 | 0.45 | 0.15  |
| 3.80  | 0.57 | 0.22  | 6.18 | 2.10 | 0.72  |
| 1.44  | 1.79 | -0.69 | 3.73 | 0.35 | -0.12 |
| 6.18  | 2.95 | 1.15  | 6.19 | 2.11 | 0.72  |
| 2.09  | 1.14 | -0.44 | 1.56 | 2.52 | -0.86 |
| 5.25  | 2.02 | 0.79  | 2.60 | 1.48 | -0.51 |
| 2.07  | 1.16 | -0.45 | 0.53 | 3.55 | -1.21 |
| 6.13  | 2.90 | 1.13  | 7.05 | 2.97 | 1.01  |
| 3.41  | 0.18 | 0.07  | 1.89 | 2.19 | -0.75 |
| 2.03  | 1.20 | -0.47 | 1.35 | 2.73 | -0.93 |
| 6.02  | 2.79 | 1.09  | 2.80 | 1.28 | -0.44 |
| 4.96  | 1.73 | 0.67  | 0.93 | 3.15 | -1.07 |
| 12.23 | 9.00 | 3.51  | 4.87 | 0.79 | 0.27  |
| 3.28  | 0.05 | 0.02  | 4.06 | 0.02 | -0.01 |
| 12.81 | 9.58 | 3.74  | 6.20 | 2.12 | 0.73  |
| 8.36  | 5.13 | 2.00  | 4.60 | 0.52 | 0.18  |
| 1.77  | 1.46 | -0.57 | 0.88 | 3.20 | -1.09 |
| 7.56  | 4.33 | 1.69  | 1.39 | 2.69 | -0.92 |
| 10.94 | 7.71 | 3.01  | 3.17 | 0.91 | -0.31 |
| 6.56  | 3.33 | 1.30  | 1.91 | 2.17 | -0.74 |
| 3.24  | 0.01 | 0.00  | 1.46 | 2.62 | -0.89 |
| 1.14  | 2.09 | -0.81 | 2.40 | 1.68 | -0.57 |
| 3.02  | 0.21 | -0.08 | 2.02 | 2.06 | -0.70 |
| 1.11  | 2.12 | -0.82 | 4.56 | 0.48 | 0.16  |

|       |       |       |       |       |       |   |
|-------|-------|-------|-------|-------|-------|---|
| 1.34  | 1.89  | -0.73 | 4.17  | 0.09  | 0.03  |   |
| 1.20  | 2.03  | -0.79 | 2.42  | 1.66  | -0.57 |   |
| 2.56  | 0.67  | -0.26 | 5.62  | 1.54  | 0.53  |   |
| 0.42  | 2.81  | -1.09 | 1.89  | 2.19  | -0.75 |   |
| 1.01  | 2.22  | -0.87 | 4.30  | 0.22  | 0.07  |   |
| 0.65  | 2.58  | -1.00 | 2.40  | 1.68  | -0.57 |   |
| 1.22  | 2.01  | -0.78 | 5.12  | 1.04  | 0.35  |   |
| 3.09  | 0.14  | -0.05 | 4.62  | 0.54  | 0.18  |   |
| 1.03  | 2.20  | -0.86 | 2.35  | 1.73  | -0.59 |   |
| 2.34  | 0.89  | -0.35 | 11.49 | 7.41  | 2.53  |   |
| 2.05  | 1.18  | -0.46 | 3.51  | 0.57  | -0.19 |   |
| 0.35  | 2.88  | -1.12 | 2.59  | 1.49  | -0.51 |   |
| 1.76  | 1.47  | -0.57 | 4.05  | 0.03  | -0.01 |   |
| 2.37  | 0.86  | -0.33 | 31.29 | 27.21 | 9.29  |   |
| 1.58  | 1.65  | -0.64 | 2.71  | 1.37  | -0.47 |   |
| 9.88  | 6.65  | 2.59  | 9.33  | 5.25  | 1.79  |   |
| 1.22  | 2.01  | -0.78 | 0.85  | 3.23  | -1.10 |   |
| 10.42 | 7.19  | 2.80  | 2.42  | 1.66  | -0.57 |   |
| 14.12 | 10.89 | 4.24  | 1.28  | 2.80  | -0.95 |   |
| 9.05  | 5.82  | 2.27  | 5.54  | 1.46  | 0.50  |   |
| 8.06  | 4.83  | 1.88  | 0.74  | 3.34  | -1.14 |   |
| 14.09 | 10.86 | 4.23  | 2.69  | 1.39  | -0.47 |   |
| 9.82  | 6.59  | 2.57  | 4.07  | 0.01  | 0.00  |   |
| 12.84 | 9.61  | 3.75  | 2.87  | 1.21  | -0.41 |   |
| 9.12  | 5.89  | 2.30  | 4.40  | 0.32  | 0.11  |   |
| 2.28  | 0.96  | -0.37 | 4.55  | 0.47  | 0.16  |   |
| 5.17  | 1.94  | 0.76  | 5.11  | 1.03  | 0.35  |   |
| 16.29 | 13.06 | 5.09  | 7.87  | 3.79  | 1.29  |   |
| 6.12  | 2.89  | 1.13  | 3.26  | 0.82  | -0.28 |   |
| 13.80 | 10.57 | 4.12  | 19.82 | 15.74 | 5.37  | y |
| 6.93  | 3.70  | 1.44  | 3.31  | 0.77  | -0.26 |   |
| 7.56  | 4.33  | 1.69  | 2.95  | 1.13  | -0.38 |   |
| 11.74 | 8.51  | 3.32  | 1.95  | 2.13  | -0.73 |   |
| 9.45  | 6.22  | 2.43  | 5.58  | 1.50  | 0.51  |   |
| 11.79 | 8.56  | 3.34  | 4.94  | 0.86  | 0.29  |   |
| 8.07  | 4.84  | 1.89  | 2.78  | 1.30  | -0.44 |   |
| 21.25 | 18.02 | 7.02  | 8.57  | 4.49  | 1.53  |   |
| 12.83 | 9.60  | 3.74  | 12.83 | 8.75  | 2.99  | x |
| 8.65  | 5.42  | 2.11  | 3.78  | 0.30  | -0.10 |   |
| 17.35 | 14.12 | 5.50  | 15.56 | 11.48 | 3.92  | x |
| 19.35 | 16.12 | 6.28  | 7.08  | 3.00  | 1.02  |   |
| 21.61 | 18.38 | 7.16  | 3.17  | 0.91  | -0.31 |   |
| 8.19  | 4.96  | 1.93  | 6.18  | 2.10  | 0.72  |   |
| 5.63  | 2.40  | 0.94  | 13.95 | 9.87  | 3.37  |   |

toxic a,b

toxic a,b

|       |              |       |       |              |        |           |
|-------|--------------|-------|-------|--------------|--------|-----------|
| 6.94  | 3.71         | 1.45  | 2.59  | 1.49         | -0.51  |           |
| 28.68 | <b>25.45</b> | 9.91  | 17.57 | <b>13.49</b> | 4.60 x | toxic a,b |
| 10.68 | <b>7.45</b>  | 2.90  | 6.58  | 2.50         | 0.85   |           |
| 43.62 | <b>40.39</b> | 15.74 | 13.92 | <b>9.84</b>  | 3.36 x | toxic a,b |
| 10.66 | <b>7.43</b>  | 2.90  | 2.32  | 1.76         | -0.60  |           |
| 10.35 | <b>7.12</b>  | 2.78  | 8.01  | 3.93         | 1.34   |           |
| 5.93  | 2.70         | 1.05  | 2.79  | 1.29         | -0.44  |           |
| 20.14 | <b>16.91</b> | 6.59  | 9.37  | 5.29         | 1.81   |           |
| 9.26  | <b>6.03</b>  | 2.35  | 7.89  | 3.81         | 1.30   |           |
| 40.71 | <b>37.48</b> | 14.60 | 4.37  | 0.29         | 0.10   |           |
| 5.71  | 2.48         | 0.97  | 0.91  | 3.17         | -1.08  |           |
| 18.00 | <b>14.77</b> | 5.75  | 4.39  | 0.31         | 0.11   |           |
| 25.81 | <b>22.58</b> | 8.80  | 12.63 | <b>8.55</b>  | 2.92 x | toxic a,b |
| 3.23  | 1.73         |       | 4.08  | 1.98         |        |           |
|       | 5.20         |       |       | 5.94         |        |           |
|       | 2.57         |       |       | 2.93         |        |           |
|       | 21.31        |       |       |              |        |           |
|       | 33.29        |       |       |              |        |           |
|       | 27.79        |       |       |              |        |           |
|       | 35.20        |       |       |              |        |           |
|       | <b>29.40</b> |       |       |              |        |           |
|       | 6.24         |       |       |              |        |           |
|       | 2.43         |       |       |              |        |           |
|       | 2.67         |       |       |              |        |           |
|       | 9.23         |       |       |              |        |           |
|       | 9.15         |       |       |              |        |           |
|       | <b>5.87</b>  |       |       |              |        |           |
|       | 3.84         |       |       |              |        |           |
|       | 18.72        |       |       |              |        |           |
|       | 11.51        |       |       |              |        |           |
|       | 30.23        |       |       |              |        |           |
|       | 23.53        |       |       |              |        |           |
|       | 1.28         |       |       |              |        |           |
|       | <b>-0.28</b> |       |       |              |        |           |
|       | 6.32         |       |       |              |        |           |
|       | 16.09        |       |       |              |        |           |
|       | 1.00         |       |       |              |        |           |
|       | 3.76         |       |       |              |        |           |
|       | 12.65        |       |       |              |        |           |
|       | 8.35         |       |       |              |        |           |

|                     |                               |                       | <u>% inf</u>        | <u>abs dev</u> | <u>robust Z</u> |
|---------------------|-------------------------------|-----------------------|---------------------|----------------|-----------------|
| 50015.00 A02        | M-007178- neural preci        | 4734.00 NEDD4         | 6.39                | 1.44           | 0.48            |
| 50015.00 A04        | M-007039- myeloid/lyn         | 58508.00 MLL3         | 3.32                | 1.63           | -0.54           |
| 50015.00 A05        | M-005791- BRCA1 asso          | 8314.00 BAP1          | 14.24               | <b>9.29</b>    | <b>3.09</b>     |
| 50015.00 A06        | M-007161- membrane-           | 220972.00 MARCH8      | 5.12                | 0.17           | 0.05            |
| 50015.00 A07        | M-006597- BRCA1 asso          | 8315.00 BRAP          | 17.00               | <b>12.05</b>   | <b>4.00</b>     |
| 50015.00 A08        | M-007186- HECT, C2 an         | 23072.00 HECW1        | 2.92                | 2.03           | -0.68           |
| 50015.00 A09        | M-004609- cylindromat         | 1540.00 CYLD          | 4.29                | 0.66           | -0.22           |
| 50015.00 A10        | M-007183- ubiquitin pr        | 9690.00 UBE3C         | 7.03                | 2.08           | 0.69            |
| 50015.00 A11        | M-017741- ubiquitin sp        | 10208.00 USPL1        | 17.95               | <b>13.00</b>   | <b>4.32</b>     |
| 50015.00 A12        | M-007196- itchy homol         | 83737.00 ITCH         | 6.50                | 1.55           | 0.51            |
| 50015.00 A13        | M-003497- histone dea         | 9759.00 HDAC4         | 10.10               | 5.15           | 1.71            |
| 50015.00 A14        | M-007181- hect (homo          | 8925.00 HERC1         | 6.18                | 1.23           | 0.41            |
| 50015.00 A15        | M-003499- histone dea         | 10013.00 HDAC6        | 10.66               | 5.71           | 1.90            |
| 50015.00 A16        | M-007188- HECT doma           | 25831.00 HECTD1       | 4.43                | 0.52           | -0.17           |
| 50015.00 A17        | M-016888- TL132 prote         | 220594.00 LOC220594   | 2.68                | 2.27           | -0.76           |
| 50015.00 A18        | M-015377- fizzy/cell div      | 51343.00 FZR1         | 4.88                | 0.07           | -0.03           |
| <b>50015.00 A19</b> | <b>M-021061- OTU domain</b>   | <b>55611.00 OTUB1</b> | <b><u>20.08</u></b> | <b>15.13</b>   | <b>5.03</b>     |
| 50015.00 A20        | M-014244- chromosom           | 65259.00 C16orf28     | 8.52                | 3.57           | 1.18            |
| 50015.00 A21        | M-009919- tumor necro         | 7128.00 TNFAIP3       | 5.27                | 0.32           | 0.11            |
| 50015.00 A23        | M-004309- ubiquitin ca        | 7345.00 UCHL1         | 9.51                | 4.56           | 1.52            |
| 50015.00 B02        | M-008030- CDC14 cell c        | 168448.00 CDC14C      | 1.48                | 3.47           | -1.15           |
| 50015.00 B04        | M-008027- dual specific       | 78986.00 DUSP26       | 1.32                | 3.63           | -1.21           |
| 50015.00 B05        | M-007187- neural preci        | 23327.00 NEDD4L       | 10.12               | 5.17           | 1.72            |
| 50015.00 B06        | M-027012- protein pho         | 57460.00 PPM1H        | 1.55                | 3.40           | -1.13           |
| 50015.00 B07        | M-020081- neural preci        | 4738.00 NEDD8         | 1.60                | 3.35           | -1.11           |
| 50015.00 B08        | M-008782- glycerol-3-p        | 2819.00 GPD1          | 5.94                | 0.99           | 0.33            |
| 50015.00 B09        | M-016715- neuralized h        | 9148.00 NEURL         | 2.96                | 1.99           | -0.66           |
| 50015.00 B10        | M-007909- dual specific       | 54935.00 DUSP23       | 1.95                | 3.00           | -1.00           |
| 50015.00 B11        | M-014128- p53-associa         | 23113.00 PARC         | 3.22                | 1.73           | -0.58           |
| 50015.00 B12        | M-014501- plasticity-re       | 79948.00 PRG2         | 3.30                | 1.65           | -0.55           |
| 50015.00 B13        | M-003530- RAD51 hom           | 5888.00 RAD51         | 12.70               | <b>7.75</b>    | <b>2.58</b>     |
| 50015.00 B14        | M-009673- FK506 bindi         | 23770.00 FKBP8        | 2.83                | 2.12           | -0.71           |
| 50015.00 B15        | M-006550- receptor-as         | 5913.00 RAPSN         | 6.24                | 1.29           | 0.43            |
| 50015.00 B16        | M-003569- dual specific       | 1852.00 DUSP9         | 1.06                | 3.89           | -1.29           |
| 50015.00 B17        | M-004087- ring-box 1          | 9978.00 RBX1          | 2.32                | 2.63           | -0.88           |
| 50015.00 B18        | M-007894- dual specific       | 1845.00 DUSP3         | 1.93                | 3.02           | -1.01           |
| 50015.00 B19        | M-006923- tripartite m        | 10206.00 TRIM13       | 8.96                | 4.01           | 1.33            |
| 50015.00 B20        | M-007893- dual specific       | 63904.00 DUSP21       | 6.84                | 1.89           | 0.63            |
| 50015.00 B21        | M-006584- polycomb g          | 7703.00 PCGF2         | 2.31                | 2.64           | -0.88           |
| 50015.00 B23        | M-006942- ring finger p       | 11236.00 RNF139       | 6.56                | 1.61           | 0.53            |
| 50015.00 C02        | M-012431- F-box and V         | 26259.00 FBXW8        | 2.24                | 2.71           | -0.90           |
| 50015.00 C04        | M-004264- F-box and V         | 55294.00 FBXW7        | 4.27                | 0.68           | -0.23           |
| <b>50015.00 C05</b> | <b>M-006059- ubiquitin ca</b> | <b>7347.00 UCHL3</b>  | <b><u>26.31</u></b> | <b>21.36</b>   | <b>7.10</b>     |

|              |                         |                  |              |      |       |
|--------------|-------------------------|------------------|--------------|------|-------|
| 50015.00 C06 | M-009706- split hand/f  | 26226.00 SHFM3P1 | 4.82         | 0.13 | -0.05 |
| 50015.00 C07 | M-006060- ubiquitin ca  | 51377.00 UCHL5   | 4.21         | 0.74 | -0.25 |
| 50015.00 C08 | M-012427- F-box and M   | 26190.00 FBXW2   | 3.48         | 1.47 | -0.49 |
| 50015.00 C09 | M-006061- ubiquitin sp  | 7398.00 USP1     | 1.19         | 3.76 | -1.25 |
| 50015.00 C10 | M-012469- F-box prote   | 26268.00 FBXO9   | 3.56         | 1.39 | -0.46 |
| 50015.00 C11 | M-006062- ubiquitin sp  | 9100.00 USP10    | 2.57         | 2.38 | -0.79 |
| 50015.00 C12 | M-013606- F-box prote   | 25793.00 FBXO7   | 3.90         | 1.05 | -0.35 |
| 50015.00 C13 | M-006063- ubiquitin sp  | 8237.00 USP11    | 2.23         | 2.72 | -0.90 |
| 50015.00 C14 | M-013314- F-box prote   | 26270.00 FBXO6   | <u>14.89</u> | 9.94 | 3.30  |
| 50015.00 C15 | M-027148- ubiquitin sp  | 219333.00 USP12  | 6.16         | 1.21 | 0.40  |
| 50015.00 C16 | M-012434- F-box prote   | 26271.00 FBXO5   | 1.30         | 3.65 | -1.21 |
| 50015.00 C17 | M-006064- ubiquitin sp  | 8975.00 USP13    | 2.14         | 2.81 | -0.93 |
| 50015.00 C18 | M-012433- F-box prote   | 26272.00 FBXO4   | 2.61         | 2.34 | -0.78 |
| 50015.00 C19 | M-006065- ubiquitin sp  | 9097.00 USP14    | 3.26         | 1.69 | -0.56 |
| 50015.00 C20 | M-012432- F-box prote   | 26273.00 FBXO3   | 6.40         | 1.45 | 0.48  |
| 50015.00 C21 | M-006066- ubiquitin sp  | 9958.00 USP15    | 3.28         | 1.67 | -0.56 |
| 50015.00 C23 | M-006067- ubiquitin sp  | 10600.00 USP16   | 3.50         | 1.45 | -0.48 |
| 50015.00 D02 | M-007892- dual specific | 142679.00 DUSP19 | 7.12         | 2.17 | 0.72  |
| 50015.00 D04 | M-007891- dual specific | 150290.00 DUSP18 | 2.42         | 2.53 | -0.84 |
| 50015.00 D05 | M-006912- ring finger p | 9781.00 RNF144   | 3.61         | 1.34 | -0.45 |
| 50015.00 D06 | M-007890- dual specific | 80824.00 DUSP16  | 2.12         | 2.83 | -0.94 |
| 50015.00 D07 | M-021419- ring finger p | 55072.00 RNF31   | 1.91         | 3.04 | -1.01 |
| 50015.00 D08 | M-008484- dual specific | 128853.00 DUSP15 | 7.08         | 2.13 | 0.71  |
| 50015.00 D09 | M-007136- ring finger p | 140545.00 RNF32  | <u>13.04</u> | 8.09 | 2.69  |
| 50015.00 D10 | M-007888- dual specific | 11072.00 DUSP14  | 10.55        | 5.60 | 1.86  |
| 50015.00 D11 | M-007144- ring finger p | 152006.00 RNF38  | 3.15         | 1.80 | -0.60 |
| 50015.00 D12 | M-007887- dual specific | 51207.00 DUSP13  | 3.16         | 1.79 | -0.60 |
| 50015.00 D13 | M-006559- ring finger p | 6049.00 RNF6     | 4.17         | 0.78 | -0.26 |
| 50015.00 D14 | M-007886- dual specific | 11266.00 DUSP12  | 10.13        | 5.18 | 1.72  |
| 50015.00 D15 | M-006907- ring finger p | 9616.00 RNF7     | 8.01         | 3.06 | 1.02  |
| 50015.00 D16 | M-017951- dolichyl pyr  | 57171.00 DOLPP1  | 11.67        | 6.72 | 2.23  |
| 50015.00 D17 | M-006900- ring finger p | 9025.00 RNF8     | 7.24         | 2.29 | 0.76  |
| 50015.00 D18 | M-009326- CTD (carbox   | 9150.00 CTD1P1   | 4.13         | 0.82 | -0.27 |
| 50015.00 D19 | M-013956- F-box and M   | 6468.00 FBXW4    | 4.32         | 0.63 | -0.21 |
| 50015.00 D20 | M-008107- transmemb     | 93492.00 TPTE2   | 5.18         | 0.23 | 0.07  |
| 50015.00 D21 | M-012598- seven in abs  | 6477.00 SIAH1    | 7.10         | 2.15 | 0.71  |
| 50015.00 D23 | M-003323- S-phase kin   | 6500.00 SKP1A    | 2.21         | 2.74 | -0.91 |
| 50015.00 E02 | M-019192- F-box prote   | 26260.00 FBXO25  | 6.26         | 1.31 | 0.43  |
| 50015.00 E04 | M-010812- F-box prote   | 26263.00 FBXO22  | 8.62         | 3.67 | 1.22  |
| 50015.00 E05 | M-004236- ubiquitin sp  | 11274.00 USP18   | 1.75         | 3.20 | -1.06 |
| 50015.00 E06 | M-012429- F-box prote   | 26232.00 FBXO2   | 10.73        | 5.78 | 1.92  |
| 50015.00 E07 | M-006068- ubiquitin sp  | 10869.00 USP19   | 9.42         | 4.47 | 1.48  |
| 50015.00 E08 | M-012428- F-box prote   | 80204.00 FBXO11  | 1.82         | 3.13 | -1.04 |
| 50015.00 E09 | M-006069- ubiquitin sp  | 9099.00 USP2     | 4.33         | 0.62 | -0.21 |

|              |                         |                 |       |       |       |
|--------------|-------------------------|-----------------|-------|-------|-------|
| 50015.00 E10 | M-026138- F-box prote   | 26267.00 FBXO10 | 13.95 | 9.00  | 2.99  |
| 50015.00 E11 | M-006070- ubiquitin sp  | 10868.00 USP20  | 3.21  | 1.74  | -0.58 |
| 50015.00 E12 | M-012426- leucine rich  | 26231.00 LRRC29 | 5.80  | 0.85  | 0.28  |
| 50015.00 E13 | M-006071- ubiquitin sp  | 27005.00 USP21  | 16.86 | 11.91 | 3.96  |
| 50015.00 E14 | M-012457- F-box and le  | 23194.00 FBXL7  | 5.53  | 0.58  | 0.19  |
| 50015.00 E15 | M-006072- ubiquitin sp  | 23326.00 USP22  | 9.65  | 4.70  | 1.56  |
| 50015.00 E16 | M-012425- F-box and le  | 26233.00 FBXL6  | 1.26  | 3.69  | -1.23 |
| 50015.00 E17 | M-006073- ubiquitin sp  | 23358.00 USP24  | 3.06  | 1.89  | -0.63 |
| 50015.00 E18 | M-012424- F-box and le  | 26234.00 FBXL5  | 7.86  | 2.91  | 0.97  |
| 50015.00 E19 | M-006074- ubiquitin sp  | 29761.00 USP25  | 8.09  | 3.14  | 1.04  |
| 50015.00 E20 | M-013564- F-box and le  | 26235.00 FBXL4  | 4.44  | 0.51  | -0.17 |
| 50015.00 E21 | M-006075- ubiquitin sp  | 83844.00 USP26  | 7.00  | 2.05  | 0.68  |
| 50015.00 E23 | M-006076- ubiquitin sp  | 57646.00 USP28  | 1.87  | 3.08  | -1.02 |
| 50015.00 F02 | M-009328- protein tyrc  | 10076.00 PTPRU  | 6.46  | 1.51  | 0.50  |
| 50015.00 F04 | M-008509- protein tyrc  | 5784.00 PTPN14  | 4.94  | 0.01  | 0.00  |
| 50015.00 F05 | M-003324- S-phase kin:  | 6502.00 SKP2    | 19.03 | 14.08 | 4.68  |
| 50015.00 F06 | M-032265- phosphatas    | 11191.00 PTENP1 | 6.31  | 1.36  | 0.45  |
| 50015.00 F07 | M-006448- helicase-like | 6596.00 HLTF    | 6.83  | 1.88  | 0.62  |
| 50015.00 F08 | M-003023- phosphatas    | 5728.00 PTEN    | 3.93  | 1.02  | -0.34 |
| 50015.00 F09 | M-007191- SMAD speci    | 57154.00 SMURF1 | 1.45  | 3.50  | -1.17 |
| 50015.00 F10 | M-032264- phosphoser    | 8781.00 PSPHL   | 2.06  | 2.89  | -0.96 |
| 50015.00 F11 | M-007194- SMAD speci    | 64750.00 SMURF2 | 4.80  | 0.15  | -0.05 |
| 50015.00 F12 | M-017077- protein pho   | 5507.00 PPP1R3C | 4.31  | 0.64  | -0.21 |
| 50015.00 F13 | M-006563- tripartite m  | 6737.00 TRIM21  | 8.48  | 3.53  | 1.17  |
| 50015.00 F14 | M-004554- protein pho   | 8493.00 PPM1D   | 14.77 | 9.82  | 3.26  |
| 50015.00 F15 | M-007201- STIP1 homo    | 10273.00 STUB1  | 3.48  | 1.47  | -0.49 |
| 50015.00 F16 | M-011500- phosphatidi   | 8612.00 PPAP2C  | 4.90  | 0.05  | -0.02 |
| 50015.00 F17 | M-010541- transcriptio  | 6921.00 TCEB1   | 4.82  | 0.13  | -0.05 |
| 50015.00 F18 | M-017312- phosphatidi   | 8613.00 PPAP2B  | 4.28  | 0.67  | -0.22 |
| 50015.00 F19 | M-020048- topoisomer    | 10210.00 TOPORS | 6.95  | 2.00  | 0.66  |
| 50015.00 F20 | M-008036- myotubular    | 4534.00 MTM1    | 14.57 | 9.62  | 3.19  |
| 50015.00 F21 | M-017305- TRIAD3 prot   | 54476.00 TRIAD3 | 41.87 | 36.92 | 12.27 |
| 50015.00 F23 | M-005392- tripartite m  | 51592.00 TRIM33 | 12.92 | 7.97  | 2.65  |
| 50015.00 G02 | M-012423- F-box and le  | 26223.00 FBXL21 | 5.60  | 0.65  | 0.21  |
| 50015.00 G04 | M-012422- F-box and le  | 26224.00 FBXL3  | 0.78  | 4.17  | -1.39 |
| 50015.00 G05 | M-006077- ubiquitin sp  | 57663.00 USP29  | 13.57 | 8.62  | 2.86  |
| 50015.00 G06 | M-013562- F-box and le  | 25827.00 FBXL2  | 1.05  | 3.90  | -1.30 |
| 50015.00 G07 | M-006078- ubiquitin sp  | 9960.00 USP3    | 6.98  | 2.03  | 0.67  |
| 50015.00 G08 | M-012458- F-box and le  | 22992.00 FBXL11 | 5.26  | 0.31  | 0.10  |
| 50015.00 G09 | M-021294- ubiquitin sp  | 84749.00 USP30  | 5.99  | 1.04  | 0.35  |
| 50015.00 G10 | M-021426- hect domai    | 26091.00 HERC4  | 5.28  | 0.33  | 0.11  |
| 50015.00 G11 | M-022513- ubiquitin sp  | 57478.00 USP31  | 6.62  | 1.67  | 0.55  |
| 50015.00 G12 | M-007189- E3 ubiquitin  | 51366.00 EDD1   | 3.18  | 1.77  | -0.59 |
| 50015.00 G13 | M-006081- ubiquitin sp  | 23032.00 USP33  | 5.70  | 0.75  | 0.25  |

|              |                         |                  |       |      |       |
|--------------|-------------------------|------------------|-------|------|-------|
| 50015.00 G14 | M-020323- CCR4-NOT t    | 4850.00 CNOT4    | 11.90 | 6.95 | 2.31  |
| 50015.00 G15 | M-006083- ubiquitin sp  | 57558.00 USP35   | 2.46  | 2.49 | -0.83 |
| 50015.00 G16 | M-007018- checkpoint    | 55743.00 CHFR    | 5.19  | 0.24 | 0.08  |
| 50015.00 G17 | M-006084- ubiquitin sp  | 57602.00 USP36   | 1.70  | 3.25 | -1.08 |
| 50015.00 G18 | M-009774- chromodor     | 1108.00 CHD4     | 6.62  | 1.67 | 0.55  |
| 50015.00 G19 | M-006085- ubiquitin sp  | 57695.00 USP37   | 2.70  | 2.25 | -0.75 |
| 50015.00 G20 | M-005174- hect domai    | 51191.00 HERC5   | 6.41  | 1.46 | 0.48  |
| 50015.00 G21 | M-006086- ubiquitin sp  | 84640.00 USP38   | 9.07  | 4.12 | 1.37  |
| 50015.00 G23 | M-004974- ubiquitin sp  | 7375.00 USP4     | 2.37  | 2.58 | -0.86 |
| 50015.00 H02 | M-021508- protein pho   | 333926.00 PPM1J  | 0.60  | 4.35 | -1.45 |
| 50015.00 H04 | M-029988- protein tyrc  | 114971.00 PTPMT1 | 4.57  | 0.38 | -0.13 |
| 50015.00 H05 | M-006538- tripartite m  | 4591.00 TRIM37   | 3.18  | 1.77 | -0.59 |
| 50015.00 H06 | M-004152- inositol poly | 3636.00 INPPL1   | 2.84  | 2.11 | -0.70 |
| 50015.00 H07 | M-006924- TRAF intera   | 10293.00 TRAIIP  | 4.53  | 0.42 | -0.14 |
| 50015.00 H08 | M-006896- epilepsy, pr  | 7957.00 EPM2A    | 2.71  | 2.24 | -0.75 |
| 50015.00 H09 | M-006949- U-box doma    | 22888.00 UBOX5   | 3.54  | 1.41 | -0.47 |
| 50015.00 H10 | M-007885- dual specific | 8446.00 DUSP11   | 4.90  | 0.05 | -0.02 |
| 50015.00 H11 | M-007197- ubiquitin pr  | 89910.00 UBE3B   | 2.06  | 2.89 | -0.96 |
| 50015.00 H12 | M-013777- CTD (carbox   | 58190.00 CTDSP1  | 8.19  | 3.24 | 1.07  |
| 50015.00 H13 | M-007202- ubiquitinati  | 10277.00 UBE4B   | 1.92  | 3.03 | -1.01 |
| 50015.00 H14 | M-003228- cell division | 995.00 CDC25C    | 5.56  | 0.61 | 0.20  |
| 50015.00 H15 | M-010691- ubiquitin pr  | 197131.00 UBR1   | 0.65  | 4.30 | -1.43 |
| 50015.00 H16 | M-003227- cell division | 994.00 CDC25B    | 3.34  | 1.61 | -0.54 |
| 50015.00 H17 | M-006977- ubiquitin-lik | 29128.00 UHRF1   | 4.35  | 0.60 | -0.20 |
| 50015.00 H18 | M-003226- cell division | 993.00 CDC25A    | 3.06  | 1.89 | -0.63 |
| 50015.00 H19 | M-006571- Wolf-Hirsch   | 7468.00 WHSC1    | 3.53  | 1.42 | -0.47 |
| 50015.00 H20 | M-003470- CDC14 cell c  | 8555.00 CDC14B   | 8.63  | 3.68 | 1.22  |
| 50015.00 H21 | M-004251- WW domain     | 11059.00 WWP1    | 13.67 | 8.72 | 2.90  |
| 50015.00 H23 | M-004252- WW domain     | 11060.00 WWP2    | 4.47  | 0.48 | -0.16 |
| 50015.00 I02 | M-006962- Cas-Br-M (n   | 23624.00 CBLC    | 2.15  | 2.80 | -0.93 |
| 50015.00 I04 | M-006954- ubiquitin pr  | 23304.00 UBR2    | 6.85  | 1.90 | 0.63  |
| 50015.00 I05 | M-006089- ubiquitin sp  | 84132.00 USP42   | 3.78  | 1.17 | -0.39 |
| 50015.00 I06 | M-006932- RanBP-type    | 10616.00 RBCK1   | 1.43  | 3.52 | -1.17 |
| 50015.00 I07 | M-006091- ubiquitin sp  | 84101.00 USP44   | 9.06  | 4.11 | 1.36  |
| 50015.00 I08 | M-003463- beta-transd   | 8945.00 BTRC     | 5.19  | 0.24 | 0.08  |
| 50015.00 I09 | M-006092- ubiquitin sp  | 64854.00 USP46   | 6.10  | 1.15 | 0.38  |
| 50015.00 I10 | M-003461- breast canc   | 672.00 BRCA1     | 1.61  | 3.34 | -1.11 |
| 50015.00 I11 | M-006095- ubiquitin sp  | 8078.00 USP5     | 6.86  | 1.91 | 0.63  |
| 50015.00 I12 | M-005230- BMI1 polyc    | 648.00 BMI1      | 8.39  | 3.44 | 1.14  |
| 50015.00 I13 | M-021192- ubiquitin sp  | 9924.00 USP52    | 8.13  | 3.18 | 1.06  |
| 50015.00 I14 | M-004392- baculoviral   | 112401.00 BIRC8  | 4.17  | 0.78 | -0.26 |
| 50015.00 I15 | M-006096- ubiquitin sp  | 9098.00 USP6     | 2.27  | 2.68 | -0.89 |
| 50015.00 I16 | M-006988- PHD finger    | 51317.00 PHF21A  | 1.58  | 3.37 | -1.12 |
| 50015.00 I17 | M-006097- ubiquitin sp  | 7874.00 USP7     | 5.34  | 0.39 | 0.13  |

|              |                         |                  |              |             |       |
|--------------|-------------------------|------------------|--------------|-------------|-------|
| 50015.00 I18 | M-004386- bifunctional  | 51283.00 BFAR    | 8.43         | 3.48        | 1.15  |
| 50015.00 I19 | M-005203- ubiquitin sp  | 9101.00 USP8     | 3.97         | 0.98        | -0.33 |
| 50015.00 I20 | M-019984- ariadne hon   | 25820.00 ARIH1   | 4.48         | 0.47        | -0.16 |
| 50015.00 I21 | M-006099- ubiquitin sp  | 8239.00 USP9X    | 5.40         | 0.45        | 0.15  |
| 50015.00 I23 | M-006100- ubiquitin sp  | 8287.00 USP9Y    | 7.24         | 2.29        | 0.76  |
| 50015.00 J02 | M-003469- CDC14 cell c  | 8556.00 CDC14A   | 4.63         | 0.32        | -0.11 |
| 50015.00 J04 | M-009262- acid phosph   | 55.00 ACPP       | 3.88         | 1.07        | -0.36 |
| 50015.00 J05 | M-007180- hect domai    | 8924.00 HERC2    | 5.15         | 0.20        | 0.07  |
| 50015.00 J06 | M-019058- acid phosph   | 52.00 ACP1       | 3.45         | 1.50        | -0.50 |
| 50015.00 J07 | M-006541- nuclear trar  | 4799.00 NFX1     | <u>11.46</u> | <b>6.51</b> | 2.16  |
| 50015.00 J08 | M-011888- phosphoser    | 5723.00 PSPH     | 11.21        | <b>6.26</b> | 2.08  |
| 50015.00 J09 | M-006906- ring finger p | 9604.00 RNF14    | 1.67         | 3.28        | -1.09 |
| 50015.00 J10 | M-016119- protein pho   | 5535.00 PPP3R2   | 2.67         | 2.28        | -0.76 |
| 50015.00 J11 | M-006561- seven in abs  | 6478.00 SIAH2    | 2.20         | 2.75        | -0.92 |
| 50015.00 J12 | M-012261- calcium and   | 10519.00 CIB1    | 3.88         | 1.07        | -0.36 |
| 50015.00 J13 | M-006522- autocrine m   | 267.00 AMFR      | 9.86         | 4.91        | 1.63  |
| 50015.00 J14 | M-008300- protein pho   | 5530.00 PPP3CA   | 7.84         | 2.89        | 0.96  |
| 50015.00 J15 | M-007182- thyroid hori  | 9320.00 TRIP12   | 6.23         | 1.28        | 0.43  |
| 50015.00 J16 | M-009615- acid phosph   | 54.00 ACP5       | 6.25         | 1.30        | 0.43  |
| 50015.00 J17 | M-003003- Cas-Br-M (n   | 867.00 CBL       | 10.19        | 5.24        | 1.74  |
| 50015.00 J18 | M-009595- kinesin fami  | 9371.00 KIF3B    | 5.34         | 0.39        | 0.13  |
| 50015.00 J19 | M-005198- TNF receptc   | 7186.00 TRAF2    | 9.82         | 4.87        | 1.62  |
| 50015.00 J20 | M-006849- kinesin fami  | 81930.00 KIF18A  | 3.10         | 1.85        | -0.62 |
| 50015.00 J21 | M-005252- TNF receptc   | 7187.00 TRAF3    | 7.17         | 2.22        | 0.74  |
| 50015.00 J23 | M-006568- TNF receptc   | 7188.00 TRAF5    | 6.30         | 1.35        | 0.45  |
| 50015.00 K02 | M-003200- anaphase pi   | 29882.00 ANAPC2  | 10.34        | 5.39        | 1.79  |
| 50015.00 K04 | M-021035- anaphase pi   | 51434.00 ANAPC7  | 5.11         | 0.16        | 0.05  |
| 50015.00 K05 | M-007179- hect domai    | 8916.00 HERC3    | 10.31        | 5.36        | 1.78  |
| 50015.00 K06 | M-013642- anaphase pi   | 29945.00 ANAPC4  | 12.06        | <b>7.11</b> | 2.36  |
| 50015.00 K07 | M-015029- F-box and le  | 84961.00 FBXL20  | 1.96         | 2.99        | -1.00 |
| 50015.00 K08 | M-006992- APC11 anap    | 51529.00 ANAPC11 | 2.80         | 2.15        | -0.71 |
| 50015.00 K09 | M-006523- tripartite m  | 373.00 TRIM23    | 3.33         | 1.62        | -0.54 |
| 50015.00 K10 | M-007200- ubiquitinati  | 9354.00 UBE4A    | 6.78         | 1.83        | 0.61  |
| 50015.00 K11 | M-003873- BRCA1 asso    | 580.00 BARD1     | 6.31         | 1.36        | 0.45  |
| 50015.00 K12 | M-009387- ubiquitin-cc  | 7321.00 UBE2D1   | 5.74         | 0.79        | 0.26  |
| 50015.00 K13 | M-023015- chromodor     | 1107.00 CHD3     | 2.46         | 2.49        | -0.83 |
| 50015.00 K14 | M-003603- Parkinson d   | 5071.00 PARK2    | 6.11         | 1.16        | 0.38  |
| 50015.00 K15 | M-004086- cullin 1      | 8454.00 CUL1     | 7.80         | 2.85        | 0.95  |
| 50015.00 K16 | M-006536- Mdm4, tran    | 4194.00 MDM4     | 4.72         | 0.23        | -0.08 |
| 50015.00 K17 | M-007277- cullin 2      | 8453.00 CUL2     | 5.77         | 0.82        | 0.27  |
| 50015.00 K18 | M-003279- Mdm2 p53      | 4193.00 MDM2     | 8.81         | 3.86        | 1.28  |
| 50015.00 K19 | M-010224- cullin 3      | 8452.00 CUL3     | 3.29         | 1.66        | -0.55 |
| 50015.00 K20 | M-003230- cell division | 997.00 CDC34     | 5.74         | 0.79        | 0.26  |
| 50015.00 K21 | M-012610- cullin 4A     | 8451.00 CUL4A    | 7.52         | 2.57        | 0.85  |



|              |                          |                  |       |      |       |
|--------------|--------------------------|------------------|-------|------|-------|
| 50015.00 K23 | M-017965- cullin 4B      | 8450.00 CUL4B    | 4.86  | 0.09 | -0.03 |
| 50015.00 L02 | M-008559- kinesin fami   | 3798.00 KIF5A    | 3.24  | 1.71 | -0.57 |
| 50015.00 L04 | M-004956- kinesin fami   | 9493.00 KIF23    | 8.91  | 3.96 | 1.31  |
| 50015.00 L05 | M-004712- TNF recepto    | 7189.00 TRAF6    | 6.84  | 1.89 | 0.63  |
| 50015.00 L06 | M-004957- kinesin fami   | 10112.00 KIF20A  | 3.03  | 1.92 | -0.64 |
| 50015.00 L07 | M-006525- deltex hom     | 1840.00 DTX1     | 3.74  | 1.21 | -0.40 |
| 50015.00 L08 | M-022067- kinesin fami   | 57576.00 KIF17   | 1.23  | 3.72 | -1.24 |
| 50015.00 L09 | M-005387- tripartite m   | 8805.00 TRIM24   | 4.06  | 0.89 | -0.30 |
| 50015.00 L10 | M-003319- kinesin fami   | 9928.00 KIF14    | 6.00  | 1.05 | 0.35  |
| 50015.00 L11 | M-022564- ring finger a  | 89970.00 RSPRY1  | 3.90  | 1.05 | -0.35 |
| 50015.00 L12 | M-010236- kinesin fami   | 547.00 KIF1A     | 6.02  | 1.07 | 0.35  |
| 50015.00 L13 | M-005478- dopamine r     | 1813.00 DRD2     | 7.93  | 2.98 | 0.99  |
| 50015.00 L14 | M-003318- M-phase ph     | 9585.00 MPHOSPH: | 7.36  | 2.41 | 0.80  |
| 50015.00 L15 | M-005479- dopamine r     | 1814.00 DRD3     | 3.25  | 1.70 | -0.57 |
| 50015.00 L16 | M-009317- kinesin fami   | 23095.00 KIF1B   | 3.07  | 1.88 | -0.63 |
| 50015.00 L17 | M-005480- dopamine r     | 1815.00 DRD4     | 4.81  | 0.14 | -0.05 |
| 50015.00 L18 | M-008345- kinesin fami   | 84643.00 KIF2B   | 3.27  | 1.68 | -0.56 |
| 50015.00 L19 | M-005488- egf-like moc   | 30817.00 EMR2    | 7.65  | 2.70 | 0.90  |
| 50015.00 L20 | M-004960- kinesin fami   | 56992.00 KIF15   | 2.76  | 2.19 | -0.73 |
| 50015.00 L21 | M-005639- 5-hydroxytr    | 3357.00 HTR2B    | 7.67  | 2.72 | 0.90  |
| 50015.00 L23 | M-027433- olfactory re   | 26245.00 OR2M4   | 3.58  | 1.37 | -0.46 |
| 50015.00 M02 | M-006950- tripartite m   | 22954.00 TRIM32  | 1.02  | 3.93 | -1.31 |
| 50015.00 M04 | M-005046- tripartite m   | 10155.00 TRIM28  | 5.77  | 0.82 | 0.27  |
| 50015.00 M05 | M-005175- hect domai     | 55008.00 HERC6   | 2.27  | 2.68 | -0.89 |
| 50015.00 M06 | M-006557- ring finger p  | 6047.00 RNF4     | 6.87  | 1.92 | 0.64  |
| 50015.00 M07 | M-007094- polycomb g     | 84759.00 PCGF1   | 4.53  | 0.42 | -0.14 |
| 50015.00 M08 | M-006554- ring finger p  | 6015.00 RING1    | 3.06  | 1.89 | -0.63 |
| 50015.00 M09 | M-006549- recombinat     | 5896.00 RAG1     | 3.26  | 1.69 | -0.56 |
| 50015.00 M10 | M-006547- promyelocy     | 5371.00 PML      | 2.58  | 2.37 | -0.79 |
| 50015.00 M11 | M-005137- ubiquitin pr   | 7337.00 UBE3A    | 5.95  | 1.00 | 0.33  |
| 50015.00 M12 | M-004828- myeloid/lyn    | 8085.00 MLL2     | 3.33  | 1.62 | -0.54 |
| 50015.00 M13 | M-007185- HECT, UBA :    | 10075.00 HUWE1   | 3.32  | 1.63 | -0.54 |
| 50015.00 M14 | M-011291- general tra    | 2966.00 GTF2H2   | 3.49  | 1.46 | -0.49 |
| 50015.00 M15 | M-003936- von Hippel-H   | 7428.00 VHL      | 8.98  | 4.03 | 1.34  |
| 50015.00 M16 | M-004098- baculoviral    | 331.00 BIRC4     | 8.42  | 3.47 | 1.15  |
| 50015.00 M17 | M-008701- anaphase p     | 10393.00 ANAPC10 | 4.53  | 0.42 | -0.14 |
| 50015.00 M18 | M-004099- baculoviral    | 330.00 BIRC3     | 3.29  | 1.66 | -0.55 |
| 50015.00 M19 | M-006936- zinc finger, l | 10771.00 ZMYND11 | 5.98  | 1.03 | 0.34  |
| 50015.00 M20 | M-004390- baculoviral    | 329.00 BIRC2     | 10.32 | 5.37 | 1.78  |
| 50015.00 M21 | M-006933- cell growth    | 10668.00 CGRRF1  | 7.68  | 2.73 | 0.91  |
| 50015.00 M23 | M-004444- D4, zinc anc   | 5977.00 DPF2     | 7.32  | 2.37 | 0.78  |
| 50015.00 N02 | M-008338- kinesin fami   | 3801.00 KIFC3    | 6.20  | 1.25 | 0.41  |
| 50015.00 N04 | M-004958- kinesin fami   | 3833.00 KIFC1    | 1.85  | 3.10 | -1.03 |
| 50015.00 N05 | M-011185- oxytocin, pr   | 5020.00 OXT      | 4.97  | 0.02 | 0.00  |

|              |                         |                  |       |       |       |
|--------------|-------------------------|------------------|-------|-------|-------|
| 50015.00 N06 | M-004967- kinesin fami  | 64147.00 KIF9    | 1.53  | 3.42  | -1.14 |
| 50015.00 N07 | M-003688- purinergic r  | 5029.00 P2RY2    | 5.27  | 0.32  | 0.11  |
| 50015.00 N08 | M-019811- kinesin fami  | 3800.00 KIF5C    | 7.24  | 2.29  | 0.76  |
| 50015.00 N09 | M-004576- G protein-c   | 9052.00 GPRC5A   | 3.06  | 1.89  | -0.63 |
| 50015.00 N10 | M-008867- kinesin fami  | 3799.00 KIF5B    | 3.33  | 1.62  | -0.54 |
| 50015.00 N11 | M-011781- signal seque  | 6745.00 SSR1     | 7.23  | 2.28  | 0.76  |
| 50015.00 N12 | M-004961- kinesin fami  | 24137.00 KIF4A   | 3.66  | 1.29  | -0.43 |
| 50015.00 N13 | M-011782- signal seque  | 6746.00 SSR2     | 3.59  | 1.36  | -0.45 |
| 50015.00 N14 | M-009469- kinesin fami  | 3797.00 KIF3C    | 11.29 | 6.34  | 2.10  |
| 50015.00 N15 | M-005466- cholinergic r | 1133.00 CHRM5    | 1.83  | 3.12  | -1.04 |
| 50015.00 N16 | M-004964- kinesin fami  | 11127.00 KIF3A   | 4.43  | 0.52  | -0.18 |
| 50015.00 N17 | M-005447- cholecystok   | 887.00 CCKBR     | 4.40  | 0.55  | -0.18 |
| 50015.00 N18 | M-004955- kinesin fami  | 11004.00 KIF2C   | 3.10  | 1.85  | -0.62 |
| 50015.00 N19 | M-005535- G protein-c   | 221188.00 GPR114 | 0.58  | 4.37  | -1.45 |
| 50015.00 N20 | M-010082- kinesin fami  | 3834.00 KIF25    | 5.92  | 0.97  | 0.32  |
| 50015.00 N21 | M-005648- leucine-rich  | 59352.00 LGR6    | 8.01  | 3.06  | 1.02  |
| 50015.00 N23 | M-029816- olfactory re  | 26492.00 OR8G2   | 6.67  | 1.72  | 0.57  |
| 50015.00 O02 | M-012875- Wolf-Hirsch   | 54904.00 WHSC1L1 | 2.48  | 2.47  | -0.82 |
| 50015.00 O04 | M-007076- tripartite m  | 81603.00 TRIM8   | 2.25  | 2.70  | -0.90 |
| 50015.00 O05 | M-007114- deltex hom    | 113878.00 DTX2   | 1.95  | 3.00  | -1.00 |
| 50015.00 O06 | M-006587- tripartite m  | 7726.00 TRIM26   | 1.20  | 3.75  | -1.25 |
| 50015.00 O07 | M-013005- F-box prote   | 114907.00 FBXO32 | 4.84  | 0.11  | -0.04 |
| 50015.00 O08 | M-006927- tripartite m  | 10346.00 TRIM22  | 3.04  | 1.91  | -0.64 |
| 50015.00 O09 | M-019252- LIM domain    | 4008.00 LMO7     | 2.69  | 2.26  | -0.75 |
| 50015.00 O10 | M-006908- TNF recept    | 9618.00 TRAF4    | 4.67  | 0.28  | -0.10 |
| 50015.00 O11 | M-014940- ligand of nu  | 84708.00 LNX1    | 8.31  | 3.36  | 1.12  |
| 50015.00 O12 | M-006551- retinoblast   | 5930.00 RBBP6    | 6.87  | 1.92  | 0.64  |
| 50015.00 O13 | M-007120- ring finger a | 117584.00 RFFL   | 6.41  | 1.46  | 0.48  |
| 50015.00 O14 | M-004591- RAD18 hom     | 56852.00 RAD18   | 2.46  | 2.49  | -0.83 |
| 50015.00 O15 | M-014033- mindbomb      | 57534.00 MIB1    | 2.81  | 2.14  | -0.71 |
| 50015.00 O16 | M-006548- peroxisoma    | 5828.00 PXMP3    | 4.93  | 0.02  | -0.01 |
| 50015.00 O17 | M-006537- midline 1 (C  | 4281.00 MID1     | 3.14  | 1.81  | -0.60 |
| 50015.00 O18 | M-019337- peroxisoma    | 5193.00 PEX12    | 7.51  | 2.56  | 0.85  |
| 50015.00 O19 | M-003281- menage a tr   | 4331.00 MNAT1    | 13.80 | 8.85  | 2.94  |
| 50015.00 O20 | M-006545- peroxisome    | 5192.00 PEX10    | 13.98 | 9.03  | 3.00  |
| 50015.00 O21 | M-007117- ubiquitin-lik | 115426.00 UHRF2  | 13.73 | 8.78  | 2.92  |
| 50015.00 O23 | M-007048- nuclear rece  | 64324.00 NSD1    | 17.23 | 12.28 | 4.08  |
| 50015.00 P02 | M-004962- kinesin fami  | 3835.00 KIF22    | 5.01  | 0.06  | 0.02  |
| 50015.00 P04 | M-004969- kinesin fami  | 55605.00 KIF21A  | 4.27  | 0.68  | -0.23 |
| 50015.00 P05 | M-005703- G protein-c   | 338557.00 GPR120 | 4.36  | 0.59  | -0.20 |
| 50015.00 P06 | M-004959- kinesin hea   | 3796.00 KIF2A    | 11.47 | 6.52  | 2.16  |
| 50015.00 P07 | M-005746- G protein-c   | 131601.00 GPR175 | 5.94  | 0.99  | 0.33  |
| 50015.00 P08 | M-010354- kinesin fami  | 10749.00 KIF1C   | 5.98  | 1.03  | 0.34  |
| 50015.00 P09 | M-005446- cholecystok   | 886.00 CCKAR     | 6.81  | 1.86  | 0.62  |

|              |                                   |           |           |       |       |       |
|--------------|-----------------------------------|-----------|-----------|-------|-------|-------|
| 50015.00 P10 | M-008257- kinesin fami            | 63971.00  | KIF13A    | 9.46  | 4.51  | 1.50  |
| 50015.00 P11 | M-005465- cholinergic i           | 1132.00   | CHRM4     | 3.80  | 1.15  | -0.39 |
| 50015.00 P12 | M-008252- kinesin fami            | 113220.00 | KIF12     | 15.85 | 10.90 | 3.62  |
| 50015.00 P13 | M-005510- galanin rece            | 2587.00   | GALR1     | 10.56 | 5.61  | 1.86  |
| 50015.00 P14 | M-003317- kinesin fami            | 3832.00   | KIF11     | 17.93 | 12.98 | 4.31  |
| 50015.00 P15 | M-004141- galanin rece            | 8484.00   | GALR3     | 6.55  | 1.60  | 0.53  |
| 50015.00 P16 | M-009495- chromosom               | 55614.00  | C20orf23  | 6.40  | 1.45  | 0.48  |
| 50015.00 P17 | M-011292- hypocretin (            | 3060.00   | HCRT      | 4.15  | 0.80  | -0.27 |
| 50015.00 P18 | M-022010- kinesin fami            | 26153.00  | KIF26A    | 9.92  | 4.97  | 1.65  |
| 50015.00 P19 | M-005626- hypocretin (            | 3061.00   | HCRTR1    | 16.77 | 11.82 | 3.93  |
| 50015.00 P20 | M-003252- centromere              | 1062.00   | CENPE     | 25.03 | 20.08 | 6.67  |
| 50015.00 P21 | M-005627- hypocretin (            | 3062.00   | HCRTR2    | 24.59 | 19.64 | 6.53  |
| 50015.00 P23 | M-008406- GULP, engu              | 51454.00  | GULP1     | 27.81 | 22.86 | 7.60  |
|              |                                   |           | mdn       | 4.95  | 2.03  |       |
|              |                                   |           | 3xmad     |       | 6.10  |       |
|              |                                   |           | MADc      |       | 3.01  |       |
| 50015.00 C22 |                                   |           |           | 24.04 |       | 22.15 |
| 50015.00 D22 |                                   | 2395.00   | 10.40     | 24.98 |       |       |
| 50015.00 E22 |                                   |           |           | 25.54 |       | 20.35 |
| 50015.00 F22 |                                   |           |           | 28.74 |       | 31.11 |
|              |                                   |           | mn        | 25.83 |       | 24.54 |
|              |                                   |           | sd        | 2.04  |       | 5.76  |
| 50015.00 G22 |                                   |           |           | 4.68  |       | 2.74  |
| 50015.00 H22 |                                   |           |           | 2.75  |       | 1.49  |
| 50015.00 I22 |                                   |           |           | 5.45  |       | 3.04  |
| 50015.00 J22 |                                   |           |           | 4.11  |       | 3.35  |
|              |                                   |           | mn        | 4.25  |       | 2.65  |
|              |                                   |           | sd        | 1.14  |       | 0.81  |
|              |                                   |           |           | 6.13  |       | 17.28 |
|              |                                   |           |           | 3.42  |       | 2.44  |
|              |                                   |           |           | 9.54  |       | 19.73 |
|              |                                   |           |           | 21.58 |       | 21.88 |
|              |                                   |           |           | 0.44  |       | 0.90  |
|              |                                   |           |           | 0.56  |       | 0.10  |
| 50015.00 G03 | M-003290- polo-like kir           | 5347.00   | PLK1 SMAF | 3.15  |       | 38.46 |
| 50015.00 H03 | M-003290- polo-like kir           | 5347.00   | PLK1 SMAF | 5.98  |       | 3.00  |
| 50015.00 I03 | D-001206- siControl non-targeting |           |           | 1.36  |       | 1.26  |
| 50015.00 J03 | D-001206- siControl non-targeting |           |           | 5.54  |       | 2.12  |
| 50015.00 K03 | D-001600- siGLO RISC-free siRNA   |           |           | 11.88 |       | 5.54  |
| 50015.00 L03 | D-001600- siGLO RISC-free siRNA   |           |           | 11.38 |       | 4.05  |

| <u>% inf</u> | <u>abs dev</u> | <u>robust Z</u> | <u>% inf</u> | <u>abs dev</u> | <u>robust Z</u> |
|--------------|----------------|-----------------|--------------|----------------|-----------------|
| 16.34        | 12.27          | 4.21            | 7.48         | 1.57           | 0.50            |
| 2.45         | 1.62           | -0.55           | 1.45         | 4.46           | -1.22           |
| 8.67         | 4.60           | 1.58            | 9.37         | 3.46           | 1.04            |
| 7.47         | 3.40           | 1.17            | 11.93        | 6.02           | 1.77            |
| 5.04         | 0.97           | 0.33            | 8.22         | 2.31           | 0.71            |
| 2.69         | 1.38           | -0.47           | 2.66         | 3.25           | -0.88           |
| 16.10        | 12.03          | 4.13            | 5.36         | 0.55           | -0.11           |
| 6.93         | 2.86           | 0.98            | 5.14         | 0.77           | -0.17           |
| 9.78         | 5.71           | 1.96            | 10.66        | 4.75           | 1.41            |
| 3.19         | 0.88           | -0.30           | 11.09        | 5.18           | 1.53            |
| 8.98         | 4.91           | 1.69            | 13.47        | 7.56           | 2.21            |
| 2.88         | 1.19           | -0.41           | 7.14         | 1.23           | 0.40            |
| 7.81         | 3.74           | 1.29            | 9.72         | 3.81           | 1.14            |
| 4.14         | 0.07           | 0.03            | 13.67        | 7.76           | 2.27            |
| 0.86         | 3.21           | -1.10           | 6.31         | 0.40           | 0.17            |
| 1.76         | 2.31           | -0.79           | 6.87         | 0.96           | 0.32            |
| <u>16.91</u> | <u>12.84</u>   | <u>4.41</u>     | <u>40.11</u> | <u>34.20</u>   | <u>9.83</u> y   |
| 5.24         | 1.17           | 0.40            | 35.68        | 29.77          | 8.56            |
| 1.84         | 2.23           | -0.76           | 7.93         | 2.02           | 0.63            |
| 0.83         | 3.24           | -1.11           | 4.05         | 1.86           | -0.48           |
| 1.05         | 3.02           | -1.03           | 7.37         | 1.46           | 0.47            |
| 1.81         | 2.26           | -0.78           | 4.51         | 1.40           | -0.35           |
| 4.18         | 0.11           | 0.04            | 10.20        | 4.29           | 1.28            |
| 0.88         | 3.19           | -1.09           | 7.72         | 1.81           | 0.57            |
| 0.71         | 3.36           | -1.15           | 6.59         | 0.68           | 0.25            |
| 2.57         | 1.50           | -0.51           | 7.66         | 1.75           | 0.55            |
| 2.23         | 1.84           | -0.63           | 2.10         | 3.81           | -1.04           |
| 1.50         | 2.57           | -0.88           | 8.78         | 2.87           | 0.87            |
| 3.02         | 1.05           | -0.36           | 2.25         | 3.66           | -1.00           |
| 1.14         | 2.93           | -1.00           | 3.15         | 2.76           | -0.74           |
| 4.22         | 0.15           | 0.05            | 21.47        | 15.56          | 4.50            |
| 3.19         | 0.88           | -0.30           | 4.37         | 1.54           | -0.39           |
| 3.24         | 0.83           | -0.28           | 3.40         | 2.51           | -0.67           |
| 2.05         | 2.02           | -0.69           | 6.43         | 0.52           | 0.20            |
| 2.04         | 2.03           | -0.69           | 0.32         | 5.59           | -1.55           |
| 2.61         | 1.46           | -0.50           | 3.32         | 2.59           | -0.69           |
| 3.39         | 0.68           | -0.23           | 10.65        | 4.74           | 1.41            |
| 6.23         | 2.16           | 0.74            | 7.63         | 1.72           | 0.54            |
| 0.29         | 3.78           | -1.30           | 3.73         | 2.18           | -0.57           |
| 2.07         | 2.00           | -0.68           | 6.56         | 0.65           | 0.24            |
| 1.81         | 2.26           | -0.77           | 3.97         | 1.94           | -0.50           |
| 3.01         | 1.06           | -0.36           | 3.62         | 2.29           | -0.60           |
| <u>10.20</u> | <u>6.13</u>    | <u>2.11</u>     | <u>23.99</u> | <u>18.08</u>   | <u>5.22</u> y   |

toxic a,b

|              |             |             |                     |             |               |
|--------------|-------------|-------------|---------------------|-------------|---------------|
| 6.23         | 2.16        | 0.74        | 8.64                | 2.73        | 0.83          |
| 2.78         | 1.29        | -0.44       | 7.43                | 1.52        | 0.49          |
| 5.51         | 1.44        | 0.49        | 1.20                | 4.71        | -1.30         |
| 4.37         | 0.30        | 0.10        | 3.41                | 2.50        | -0.67         |
| 2.26         | 1.81        | -0.62       | 6.78                | 0.87        | 0.30          |
| 3.39         | 0.68        | -0.23       | 1.33                | 4.58        | -1.26         |
| 5.46         | 1.39        | 0.48        | 4.83                | 1.08        | -0.26         |
| 2.44         | 1.63        | -0.56       | 1.09                | 4.82        | -1.33         |
| <b>12.65</b> | <b>8.58</b> | <b>2.95</b> | <u><b>12.52</b></u> | <b>6.61</b> | <b>1.94</b> y |
| 7.65         | 3.58        | 1.23        | 7.25                | 1.34        | 0.43          |
| 8.02         | 3.95        | 1.36        | 5.51                | 0.40        | -0.06         |
| 5.07         | 1.00        | 0.34        | 3.94                | 1.97        | -0.51         |
| 10.14        | <b>6.07</b> | <b>2.08</b> | 2.86                | 3.05        | -0.82         |
| 7.16         | 3.09        | 1.06        | 5.64                | 0.27        | -0.03         |
| 6.94         | 2.87        | 0.98        | 6.33                | 0.42        | 0.17          |
| 10.64        | <b>6.57</b> | <b>2.25</b> | 7.34                | 1.43        | 0.46          |
| 4.19         | 0.12        | 0.04        | 4.11                | 1.80        | -0.46         |
| 5.49         | 1.42        | 0.49        | 2.55                | 3.36        | -0.91         |
| 4.52         | 0.45        | 0.15        | 2.19                | 3.72        | -1.01         |
| 3.74         | 0.33        | -0.11       | 2.83                | 3.08        | -0.83         |
| 8.63         | 4.56        | 1.56        | 2.36                | 3.55        | -0.97         |
| 1.56         | 2.51        | -0.86       | 1.19                | 4.72        | -1.30         |
| 6.28         | 2.21        | 0.76        | 2.93                | 2.98        | -0.80         |
| <b>11.37</b> | <b>7.30</b> | <b>2.51</b> | <u><b>10.78</b></u> | <b>4.87</b> | <b>1.44</b> y |
| 4.69         | 0.62        | 0.21        | 2.79                | 3.12        | -0.84         |
| 10.64        | <b>6.57</b> | <b>2.25</b> | 1.92                | 3.99        | -1.09         |
| 3.10         | 0.97        | -0.33       | 1.15                | 4.76        | -1.31         |
| 2.81         | 1.26        | -0.43       | 2.26                | 3.65        | -0.99         |
| 13.51        | <b>9.44</b> | <b>3.24</b> | 8.63                | 2.72        | 0.83          |
| 2.63         | 1.44        | -0.49       | 3.18                | 2.73        | -0.73         |
| 7.51         | 3.44        | 1.18        | 3.26                | 2.65        | -0.71         |
| 8.64         | 4.57        | 1.57        | 5.11                | 0.80        | -0.18         |
| 4.59         | 0.52        | 0.18        | 5.96                | 0.05        | 0.06          |
| 6.67         | 2.60        | 0.89        | 2.78                | 3.13        | -0.84         |
| 6.38         | 2.31        | 0.79        | 2.10                | 3.81        | -1.04         |
| 3.59         | 0.48        | -0.16       | 8.48                | 2.57        | 0.79          |
| 1.84         | 2.23        | -0.76       | 1.38                | 4.53        | -1.24         |
| 4.60         | 0.53        | 0.18        | 10.02               | 4.11        | 1.22          |
| 5.47         | 1.40        | 0.48        | 7.35                | 1.44        | 0.46          |
| 0.83         | 3.24        | -1.11       | 1.49                | 4.42        | -1.21         |
| 3.98         | 0.09        | -0.03       | 11.18               | 5.27        | 1.56          |
| 2.43         | 1.64        | -0.56       | 5.72                | 0.20        | -0.01         |
| 2.11         | 1.96        | -0.67       | 1.37                | 4.54        | -1.25         |
| 0.32         | 3.75        | -1.29       | 4.19                | 1.72        | -0.44         |

|              |              |             |              |              |             |   |
|--------------|--------------|-------------|--------------|--------------|-------------|---|
| 3.45         | 0.62         | -0.21       | 12.53        | 6.62         | 1.94        |   |
| 1.93         | 2.14         | -0.73       | 2.21         | 3.70         | -1.01       |   |
| 1.25         | 2.82         | -0.96       | 5.09         | 0.82         | -0.18       |   |
| 8.05         | 3.98         | 1.37        | 9.29         | 3.38         | 1.02        |   |
| 1.18         | 2.89         | -0.99       | 7.84         | 1.93         | 0.60        |   |
| 6.61         | 2.54         | 0.87        | 10.51        | 4.60         | 1.37        |   |
| 2.30         | 1.77         | -0.60       | 4.08         | 1.83         | -0.47       |   |
| 4.07         | 0.00         | 0.00        | 1.63         | 4.28         | -1.17       |   |
| 6.60         | 2.53         | 0.87        | 7.26         | 1.35         | 0.44        |   |
| 6.50         | 2.43         | 0.84        | 7.45         | 1.54         | 0.49        |   |
| 4.65         | 0.58         | 0.20        | 3.94         | 1.97         | -0.51       |   |
| 7.56         | 3.49         | 1.20        | 7.30         | 1.39         | 0.45        |   |
| 2.38         | 1.69         | -0.58       | 2.58         | 3.33         | -0.90       |   |
| 3.12         | 0.95         | -0.33       | 1.87         | 4.04         | -1.10       |   |
| 8.97         | 4.90         | 1.68        | 6.03         | 0.12         | 0.08        |   |
| <u>18.66</u> | <u>14.59</u> | <u>5.01</u> | <u>25.36</u> | <u>19.45</u> | <u>5.61</u> | y |
| 5.26         | 1.19         | 0.41        | 7.88         | 1.97         | 0.61        |   |
| 4.08         | 0.01         | 0.00        | 5.89         | 0.02         | 0.04        |   |
| 3.45         | 0.62         | -0.21       | 13.02        | <u>7.11</u>  | <u>2.08</u> |   |
| 7.39         | 3.32         | 1.14        | 8.20         | 2.29         | 0.70        |   |
| 4.16         | 0.09         | 0.03        | 4.78         | 1.13         | -0.27       |   |
| 8.70         | 4.63         | 1.59        | 5.50         | 0.41         | -0.07       |   |
| 5.09         | 1.02         | 0.35        | 4.25         | 1.66         | -0.43       |   |
| 3.68         | 0.39         | -0.13       | 7.93         | 2.02         | 0.63        |   |
| <u>14.06</u> | <u>9.99</u>  | <u>3.43</u> | <u>10.96</u> | <u>5.05</u>  | <u>1.49</u> | y |
| 3.27         | 0.80         | -0.27       | 6.02         | 0.11         | 0.08        |   |
| 4.34         | 0.27         | 0.09        | 5.16         | 0.75         | -0.16       |   |
| 6.87         | 2.80         | 0.96        | 6.77         | 0.86         | 0.30        |   |
| 3.52         | 0.55         | -0.19       | 6.74         | 0.83         | 0.29        |   |
| 6.43         | 2.36         | 0.81        | 6.33         | 0.42         | 0.17        |   |
| 8.21         | 4.14         | 1.42        | 9.09         | 3.18         | 0.96        |   |
| 10.43        | <u>6.36</u>  | <u>2.18</u> | 12.59        | 6.68         | 1.96        | x |
| <u>9.92</u>  | <u>5.85</u>  | <u>2.01</u> | <u>13.70</u> | <u>7.79</u>  | <u>2.28</u> | y |
| 4.06         | 0.01         | 0.00        | 6.29         | 0.38         | 0.16        |   |
| 6.69         | 2.62         | 0.90        | 4.17         | 1.74         | -0.45       |   |
| 10.04        | <u>5.97</u>  | <u>2.05</u> | 7.90         | 1.99         | 0.62        | x |
| 6.00         | 1.93         | 0.66        | 2.07         | 3.84         | -1.05       |   |
| 3.22         | 0.85         | -0.29       | 7.72         | 1.81         | 0.57        |   |
| 3.97         | 0.10         | -0.03       | 6.06         | 0.15         | 0.09        |   |
| 1.54         | 2.53         | -0.87       | 2.99         | 2.92         | -0.78       |   |
| 7.83         | 3.76         | 1.29        | 5.60         | 0.31         | -0.04       |   |
| 4.46         | 0.39         | 0.13        | 7.94         | 2.03         | 0.63        |   |
| 5.78         | 1.71         | 0.59        | 3.03         | 2.88         | -0.77       |   |
| 5.73         | 1.66         | 0.57        | 7.69         | 1.78         | 0.56        |   |

debris b,c

debris b,c

|       |       |       |       |      |       |
|-------|-------|-------|-------|------|-------|
| 9.72  | 5.65  | 1.94  | 9.57  | 3.66 | 1.10  |
| 2.19  | 1.88  | -0.64 | 5.50  | 0.41 | -0.07 |
| 13.26 | 9.19  | 3.15  | 4.59  | 1.32 | -0.33 |
| 4.90  | 0.83  | 0.28  | 2.65  | 3.26 | -0.88 |
| 24.57 | 20.50 | 7.03  | 7.95  | 2.04 | 0.63  |
| 5.86  | 1.79  | 0.61  | 2.70  | 3.21 | -0.87 |
| 9.65  | 5.58  | 1.91  | 4.67  | 1.24 | -0.30 |
| 13.84 | 9.77  | 3.35  | 10.25 | 4.34 | 1.29  |
| 2.56  | 1.51  | -0.52 | 4.06  | 1.85 | -0.48 |
| 1.57  | 2.50  | -0.86 | 3.43  | 2.49 | -0.66 |
| 3.61  | 0.46  | -0.16 | 5.98  | 0.07 | 0.07  |
| 3.58  | 0.49  | -0.17 | 1.79  | 4.12 | -1.13 |
| 2.40  | 1.67  | -0.57 | 3.47  | 2.44 | -0.65 |
| 4.53  | 0.46  | 0.16  | 1.04  | 4.87 | -1.34 |
| 1.44  | 2.63  | -0.90 | 2.15  | 3.76 | -1.02 |
| 3.10  | 0.97  | -0.33 | 1.27  | 4.64 | -1.28 |
| 4.35  | 0.28  | 0.10  | 4.16  | 1.75 | -0.45 |
| 2.49  | 1.58  | -0.54 | 2.45  | 3.46 | -0.94 |
| 1.69  | 2.38  | -0.81 | 3.95  | 1.96 | -0.51 |
| 1.86  | 2.21  | -0.76 | 0.79  | 5.12 | -1.41 |
| 5.47  | 1.40  | 0.48  | 3.24  | 2.67 | -0.71 |
| 1.04  | 3.03  | -1.04 | 0.72  | 5.19 | -1.43 |
| 3.51  | 0.56  | -0.19 | 1.62  | 4.29 | -1.18 |
| 3.37  | 0.70  | -0.24 | 4.04  | 1.87 | -0.49 |
| 0.60  | 3.47  | -1.19 | 0.38  | 5.53 | -1.53 |
| 1.61  | 2.46  | -0.84 | 4.25  | 1.66 | -0.42 |
| 6.80  | 2.73  | 0.94  | 3.67  | 2.24 | -0.59 |
| 5.76  | 1.69  | 0.58  | 5.81  | 0.10 | 0.02  |
| 5.92  | 1.85  | 0.64  | 3.12  | 2.79 | -0.75 |
| 1.48  | 2.59  | -0.89 | 3.84  | 2.07 | -0.54 |
| 2.44  | 1.63  | -0.56 | 12.03 | 6.12 | 1.80  |
| 1.37  | 2.70  | -0.93 | 6.23  | 0.32 | 0.14  |
| 3.02  | 1.05  | -0.36 | 6.00  | 0.09 | 0.08  |
| 5.19  | 1.12  | 0.38  | 10.94 | 5.03 | 1.49  |
| 1.34  | 2.73  | -0.93 | 8.27  | 2.36 | 0.73  |
| 1.87  | 2.20  | -0.75 | 4.24  | 1.67 | -0.43 |
| 1.77  | 2.30  | -0.79 | 8.24  | 2.33 | 0.72  |
| 7.12  | 3.05  | 1.05  | 4.59  | 1.32 | -0.33 |
| 4.58  | 0.51  | 0.17  | 6.03  | 0.12 | 0.09  |
| 2.69  | 1.38  | -0.47 | 4.87  | 1.04 | -0.25 |
| 1.61  | 2.46  | -0.84 | 5.24  | 0.67 | -0.14 |
| 3.98  | 0.09  | -0.03 | 10.21 | 4.30 | 1.28  |
| 1.07  | 3.00  | -1.03 | 6.87  | 0.96 | 0.32  |
| 5.40  | 1.33  | 0.46  | 5.06  | 0.85 | -0.19 |

|              |             |       |              |              |         |
|--------------|-------------|-------|--------------|--------------|---------|
| 4.95         | 0.88        | 0.30  | 4.73         | 1.18         | -0.29   |
| 3.23         | 0.84        | -0.29 | 4.83         | 1.08         | -0.26   |
| 2.34         | 1.73        | -0.59 | 5.70         | 0.21         | -0.01   |
| 3.88         | 0.19        | -0.07 | 5.75         | 0.16         | 0.01    |
| 3.34         | 0.73        | -0.25 | 9.90         | 3.99         | 1.19    |
| 3.29         | 0.78        | -0.27 | 3.77         | 2.14         | -0.56   |
| 3.69         | 0.38        | -0.13 | 4.84         | 1.07         | -0.26   |
| 5.86         | 1.79        | 0.61  | 6.06         | 0.15         | 0.09    |
| 3.78         | 0.29        | -0.10 | 3.40         | 2.51         | -0.67   |
| <u>11.87</u> | <b>7.80</b> | -2.68 | <u>23.40</u> | <b>17.49</b> | -5.05 y |
| 6.94         | 2.87        | 0.98  | 9.73         | 3.82         | 1.14    |
| 0.78         | 3.29        | -1.13 | 3.97         | 1.94         | -0.50   |
| 1.98         | 2.09        | -0.72 | 3.53         | 2.38         | -0.63   |
| 1.55         | 2.52        | -0.86 | 1.79         | 4.12         | -1.13   |
| 0.71         | 3.36        | -1.15 | 6.46         | 0.55         | 0.21    |
| 5.35         | 1.28        | 0.44  | 12.72        | 6.81         | 2.00    |
| 6.40         | 2.33        | 0.80  | 8.76         | 2.85         | 0.87    |
| 6.21         | 2.14        | 0.74  | 6.98         | 1.07         | 0.36    |
| 5.87         | 1.80        | 0.62  | 10.74        | 4.83         | 1.43    |
| 9.03         | 4.96        | 1.70  | 6.71         | 0.80         | 0.28    |
| 3.50         | 0.57        | -0.19 | 2.24         | 3.67         | -1.00   |
| 5.01         | 0.94        | 0.32  | 6.52         | 0.61         | 0.22    |
| 2.27         | 1.80        | -0.62 | 3.50         | 2.41         | -0.64   |
| 2.49         | 1.58        | -0.54 | 3.55         | 2.36         | -0.63   |
| 2.74         | 1.33        | -0.45 | 6.55         | 0.64         | 0.23    |
| 1.86         | 2.21        | -0.76 | 10.22        | 4.31         | 1.28    |
| 3.33         | 0.74        | -0.25 | 11.47        | 5.56         | 1.64    |
| 2.76         | 1.31        | -0.45 | 6.22         | 0.31         | 0.14    |
| 8.06         | 3.99        | 1.37  | 14.31        | <b>8.40</b>  | -2.45 x |
| 2.85         | 1.22        | -0.42 | 4.04         | 1.87         | -0.48   |
| 3.98         | 0.09        | -0.03 | 4.47         | 1.44         | -0.36   |
| 3.30         | 0.77        | -0.26 | 3.48         | 2.43         | -0.64   |
| 3.46         | 0.61        | -0.21 | 6.16         | 0.25         | 0.12    |
| 2.66         | 1.41        | -0.48 | 9.83         | 3.92         | 1.17    |
| 3.96         | 0.11        | -0.04 | 7.46         | 1.55         | 0.49    |
| 6.24         | 2.17        | 0.75  | 2.96         | 2.95         | -0.79   |
| 10.66        | <b>6.59</b> | -2.26 | 5.83         | 0.08         | 0.03    |
| 6.05         | 1.98        | 0.68  | 10.47        | 4.56         | 1.35    |
| 7.71         | 3.64        | 1.25  | 5.94         | 0.03         | 0.06    |
| 4.37         | 0.30        | 0.10  | 8.64         | 2.73         | 0.83    |
| 6.54         | 2.47        | 0.85  | 15.08        | <b>9.17</b>  | -2.67   |
| 7.58         | 3.51        | 1.20  | 4.89         | 1.02         | -0.24   |
| 4.75         | 0.68        | 0.23  | 8.71         | 2.80         | 0.85    |
| 12.42        | <b>8.35</b> | -2.87 | 10.06        | 4.15         | 1.24    |

toxic b,c



|       |       |       |       |       |       |
|-------|-------|-------|-------|-------|-------|
| 5.33  | 1.26  | 0.43  | 4.47  | 1.44  | -0.36 |
| 2.73  | 1.34  | -0.46 | 3.26  | 2.65  | -0.71 |
| 5.84  | 1.77  | 0.61  | 6.61  | 0.70  | 0.25  |
| 3.71  | 0.36  | -0.12 | 5.88  | 0.03  | 0.04  |
| 1.07  | 3.00  | -1.03 | 3.26  | 2.65  | -0.71 |
| 1.60  | 2.47  | -0.85 | 5.63  | 0.28  | -0.03 |
| 0.12  | 3.95  | -1.35 | 1.96  | 3.95  | -1.08 |
| 6.55  | 2.48  | 0.85  | 11.66 | 5.75  | 1.69  |
| 7.84  | 3.77  | 1.30  | 8.45  | 2.54  | 0.78  |
| 2.91  | 1.16  | -0.40 | 3.18  | 2.73  | -0.73 |
| 2.79  | 1.28  | -0.44 | 9.33  | 3.42  | 1.03  |
| 5.95  | 1.88  | 0.65  | 19.60 | 13.69 | 3.97  |
| 9.76  | 5.69  | 1.95  | 8.27  | 2.36  | 0.72  |
| 1.33  | 2.74  | -0.94 | 4.69  | 1.22  | -0.30 |
| 4.45  | 0.38  | 0.13  | 2.65  | 3.26  | -0.88 |
| 7.04  | 2.97  | 1.02  | 6.59  | 0.68  | 0.24  |
| 10.94 | 6.87  | 2.36  | 9.44  | 3.53  | 1.06  |
| 8.90  | 4.83  | 1.66  | 4.39  | 1.52  | -0.39 |
| 3.41  | 0.66  | -0.22 | 9.52  | 3.61  | 1.08  |
| 16.16 | 12.09 | 4.15  | 6.42  | 0.51  | 0.20  |
| 9.42  | 5.35  | 1.84  | 3.40  | 2.51  | -0.67 |
| 0.25  | 3.82  | -1.31 | 1.69  | 4.22  | -1.16 |
| 2.33  | 1.74  | -0.59 | 7.54  | 1.63  | 0.52  |
| 2.67  | 1.40  | -0.48 | 2.77  | 3.14  | -0.85 |
| 3.48  | 0.59  | -0.20 | 8.71  | 2.80  | 0.85  |
| 1.66  | 2.41  | -0.82 | 3.38  | 2.53  | -0.67 |
| 1.74  | 2.33  | -0.80 | 4.71  | 1.20  | -0.29 |
| 3.06  | 1.01  | -0.35 | 6.42  | 0.51  | 0.20  |
| 2.23  | 1.84  | -0.63 | 0.87  | 5.04  | -1.39 |
| 5.08  | 1.01  | 0.35  | 6.22  | 0.31  | 0.14  |
| 1.68  | 2.39  | -0.82 | 4.37  | 1.54  | -0.39 |
| 7.09  | 3.02  | 1.04  | 10.17 | 4.26  | 1.27  |
| 3.16  | 0.91  | -0.31 | 4.03  | 1.88  | -0.49 |
| 5.87  | 1.80  | 0.62  | 4.84  | 1.07  | -0.26 |
| 8.40  | 4.33  | 1.49  | 4.10  | 1.81  | -0.47 |
| 7.36  | 3.29  | 1.13  | 2.13  | 3.78  | -1.03 |
| 4.35  | 0.28  | 0.10  | 2.46  | 3.45  | -0.93 |
| 6.36  | 2.29  | 0.79  | 2.00  | 3.91  | -1.07 |
| 8.74  | 4.67  | 1.60  | 1.28  | 4.63  | -1.27 |
| 17.58 | 13.51 | 4.64  | 6.02  | 0.11  | 0.08  |
| 13.70 | 9.63  | 3.30  | 9.08  | 3.17  | 0.96  |
| 1.07  | 3.00  | -1.03 | 0.92  | 4.99  | -1.38 |
| 0.94  | 3.13  | -1.07 | 2.39  | 3.52  | -0.96 |
| 3.20  | 0.87  | -0.30 | 2.48  | 3.43  | -0.93 |

|       |       |       |       |       |        |             |
|-------|-------|-------|-------|-------|--------|-------------|
| 1.05  | 3.02  | -1.03 | 5.23  | 0.68  | -0.14  |             |
| 2.53  | 1.54  | -0.53 | 1.97  | 3.94  | -1.08  |             |
| 1.90  | 2.17  | -0.74 | 3.68  | 2.23  | -0.59  |             |
| 2.61  | 1.46  | -0.50 | 4.85  | 1.06  | -0.25  |             |
| 0.37  | 3.70  | -1.27 | 4.91  | 1.00  | -0.24  |             |
| 3.98  | 0.09  | -0.03 | 7.53  | 1.62  | 0.51   |             |
| 4.64  | 0.57  | 0.20  | 4.96  | 0.95  | -0.22  |             |
| 2.53  | 1.54  | -0.53 | 2.75  | 3.16  | -0.85  |             |
| 10.18 | 6.11  | 2.10  | 6.74  | 0.83  | 0.29 x | toxic a,c   |
| 3.49  | 0.58  | -0.20 | 7.53  | 1.62  | 0.51   |             |
| 2.11  | 1.96  | -0.67 | 3.90  | 2.01  | -0.52  |             |
| 2.71  | 1.36  | -0.47 | 5.20  | 0.71  | -0.15  |             |
| 3.59  | 0.48  | -0.16 | 7.94  | 2.03  | 0.63   |             |
| 3.68  | 0.39  | -0.13 | 2.41  | 3.50  | -0.95  |             |
| 4.63  | 0.56  | 0.19  | 2.44  | 3.47  | -0.94  |             |
| 11.32 | 7.25  | 2.49  | 6.86  | 0.95  | 0.32   |             |
| 2.85  | 1.22  | -0.42 | 8.35  | 2.44  | 0.75   |             |
| 1.93  | 2.14  | -0.73 | 4.41  | 1.50  | -0.38  |             |
| 1.15  | 2.92  | -1.00 | 3.67  | 2.24  | -0.59  |             |
| 2.04  | 2.03  | -0.70 | 6.46  | 0.55  | 0.21   |             |
| 0.93  | 3.14  | -1.08 | 4.07  | 1.84  | -0.48  |             |
| 5.99  | 1.92  | 0.66  | 9.66  | 3.75  | 1.12   |             |
| 4.07  | 0.00  | 0.00  | 4.43  | 1.48  | -0.37  |             |
| 4.94  | 0.87  | 0.30  | 8.23  | 2.32  | 0.71   |             |
| 6.65  | 2.58  | 0.89  | 10.67 | 4.76  | 1.41   |             |
| 5.54  | 1.47  | 0.51  | 14.91 | 9.00  | 2.63   |             |
| 6.07  | 2.00  | 0.69  | 7.32  | 1.41  | 0.45   |             |
| 9.47  | 5.40  | 1.85  | 10.70 | 4.79  | 1.42   |             |
| 4.82  | 0.75  | 0.26  | 7.21  | 1.30  | 0.42   |             |
| 2.36  | 1.71  | -0.59 | 4.63  | 1.28  | -0.32  |             |
| 2.65  | 1.42  | -0.48 | 14.42 | 8.51  | 2.48   |             |
| 7.05  | 2.98  | 1.02  | 3.46  | 2.45  | -0.65  |             |
| 11.65 | 7.58  | 2.60  | 7.70  | 1.79  | 0.56   |             |
| 19.26 | 15.19 | 5.21  | 15.63 | 9.72  | 2.83 x | toxic a,b   |
| 14.29 | 10.22 | 3.51  | 6.35  | 0.44  | 0.18 x | toxic a,b   |
| 14.57 | 10.50 | 3.60  | 12.35 | 6.44  | 1.89 y |             |
| 5.83  | 1.76  | 0.61  | 3.01  | 2.90  | -0.78  |             |
| 3.84  | 0.23  | -0.08 | 1.96  | 3.95  | -1.08  |             |
| 4.54  | 0.47  | 0.16  | 5.42  | 0.49  | -0.09  |             |
| 5.78  | 1.71  | 0.59  | 8.16  | 2.25  | 0.69   |             |
| 6.62  | 2.55  | 0.88  | 17.40 | 11.49 | 3.34 x | toxic a,b,c |
| 0.79  | 3.28  | -1.13 | 4.87  | 1.04  | -0.25  |             |
| 1.18  | 2.89  | -0.99 | 7.10  | 1.19  | 0.39   |             |
| 5.93  | 1.86  | 0.64  | 7.26  | 1.35  | 0.44   |             |

|       |       |       |       |       |       |               |
|-------|-------|-------|-------|-------|-------|---------------|
| 2.65  | 1.42  | -0.49 | 10.17 | 4.26  | 1.27  |               |
| 1.40  | 2.67  | -0.91 | 6.62  | 0.71  | 0.25  |               |
| 16.07 | 12.00 | 4.12  | 26.96 | 21.05 | 6.07  | x toxic a,b,c |
| 4.23  | 0.16  | 0.06  | 8.67  | 2.76  | 0.84  |               |
| 4.79  | 0.72  | 0.25  | 16.13 | 10.22 | 2.97  | x toxic a,b,c |
| 4.02  | 0.05  | -0.01 | 7.35  | 1.44  | 0.46  |               |
| 1.27  | 2.80  | -0.96 | 4.85  | 1.06  | -0.25 |               |
| 1.07  | 3.00  | -1.03 | 1.96  | 3.95  | -1.08 |               |
| 2.87  | 1.20  | -0.41 | 2.90  | 3.01  | -0.81 |               |
| 8.31  | 4.24  | 1.46  | 5.93  | 0.02  | 0.06  |               |
| 3.27  | 0.80  | -0.27 | 9.25  | 3.34  | 1.01  |               |
| 7.54  | 3.47  | 1.19  | 12.39 | 6.48  | 1.90  |               |
| 8.53  | 4.46  | 1.53  | 4.87  | 1.04  | -0.25 |               |
| 4.07  | 1.97  |       | 5.73  | 2.36  |       |               |
|       | 5.91  |       |       | 7.09  |       |               |
|       | 2.91  |       |       | 3.50  |       |               |
|       | 25.67 |       |       |       |       |               |
|       | 22.92 |       |       |       |       |               |
|       | 26.45 |       |       |       |       |               |
|       | 31.71 |       |       |       |       |               |
|       | 26.69 |       |       |       |       |               |
|       | 3.68  |       |       |       |       |               |
|       | 2.06  |       |       |       |       |               |
|       | 1.82  |       |       |       |       |               |
|       | 4.58  |       |       |       |       |               |
|       | 3.49  |       |       |       |       |               |
|       | 2.99  |       |       |       |       |               |
|       | 1.29  |       |       |       |       |               |
|       | 11.03 |       |       |       |       |               |
|       | 10.20 |       |       |       |       |               |
|       | 21.23 |       |       |       |       |               |
|       | 23.70 |       |       |       |       |               |
|       | 0.90  |       |       |       |       |               |
|       | 0.10  |       |       |       |       |               |
|       | 12.20 |       |       |       |       |               |
|       | 5.08  |       |       |       |       |               |
|       | 8.83  |       |       |       |       |               |
|       | 6.02  |       |       |       |       |               |
|       | 11.14 |       |       |       |       |               |
|       | 12.94 |       |       |       |       |               |

|              |                          |           |          | <u>% inf</u> | <u>abs dev</u> | <u>robust Z</u> | <u>% inf</u> |
|--------------|--------------------------|-----------|----------|--------------|----------------|-----------------|--------------|
| 50016.00 A02 | M-011688- major histc    | 3123.00   | HLA-DRB1 | 10.98        | 3.06           | 0.68            | 5.59         |
| 50016.00 A04 | M-020310- killer cell ir | 57292.00  | KIR2DL5A | 10.92        | 3.00           | 0.67            | 7.43         |
| 50016.00 A05 | M-008031- serine/thre    | 51657.00  | STYXL1   | 10.33        | 2.41           | 0.53            | 3.38         |
| 50016.00 A06 | M-012316- KDEL (Lys-/    | 11015.00  | KDEL3    | 17.19        | 9.27           | 2.06            | 12.18        |
| 50016.00 A07 | M-008037- myotubula      | 8776.00   | MTMR1    | 7.48         | 0.44           | -0.10           | 6.35         |
| 50016.00 A08 | M-006238- potassium      | 131096.00 | KCNH8    | 4.57         | 3.35           | -0.74           | 3.92         |
| 50016.00 A09 | M-008038- myotubula      | 8898.00   | MTMR2    | 7.65         | 0.27           | -0.06           | 9.31         |
| 50016.00 A10 | M-006237- potassium      | 90134.00  | KCNH7    | 8.18         | 0.26           | 0.06            | 4.45         |
| 50016.00 A11 | M-008040- myotubula      | 9110.00   | MTMR4    | 5.57         | 2.35           | -0.52           | 6.60         |
| 50016.00 A12 | M-006234- potassium      | 23415.00  | KCNH4    | 5.55         | 2.37           | -0.53           | 2.07         |
| 50016.00 A13 | M-008309- myotubula      | 9107.00   | MTMR6    | 14.56        | 6.64           | 1.48            | 7.26         |
| 50016.00 A14 | M-010707- potassium      | 23416.00  | KCNH3    | 7.38         | 0.54           | -0.12           | 3.96         |
| 50016.00 A15 | M-008041- myotubula      | 9108.00   | MTMR7    | 9.87         | 1.95           | 0.43            | 2.79         |
| 50016.00 A16 | M-006233- potassium      | 3757.00   | KCNH2    | 8.40         | 0.48           | 0.11            | 5.61         |
| 50016.00 A17 | M-008042- myotubula      | 55613.00  | MTMR8    | 8.82         | 0.90           | 0.20            | 5.74         |
| 50016.00 A18 | M-006209- inositol 1,4   | 3710.00   | ITPR3    | 1.28         | 6.64           | -1.48           | 2.41         |
| 50016.00 A19 | M-022572- pyruvate d     | 57546.00  | PDP2     | 9.23         | 1.31           | 0.29            | 4.84         |
| 50016.00 A20 | M-006207- inositol 1,4   | 3708.00   | ITPR1    | 7.49         | 0.43           | -0.10           | 7.14         |
| 50016.00 A21 | M-019103- PH domain      | 23239.00  | PHLPP    | 7.19         | 0.73           | -0.16           | 3.87         |
| 50016.00 A23 | M-009479- protein phi    | 5475.00   | PPEF1    | 10.69        | 2.77           | 0.61            | 3.68         |
| 50016.00 B02 | M-004379- BCL2-assoc     | 9530.00   | BAG4     | 4.21         | 3.71           | -0.83           | 1.75         |
| 50016.00 B04 | M-010997- arginine va    | 551.00    | AVP      | 4.57         | 3.35           | -0.75           | 2.44         |
| 50016.00 B05 | M-013303- ribosomal      | 3921.00   | RPSA     | 11.41        | 3.49           | 0.77            | 4.14         |
| 50016.00 B06 | M-011587- agouti sign    | 434.00    | ASIP     | 3.24         | 4.68           | -1.04           | 4.86         |
| 50016.00 B07 | M-020541- linker for a   | 27040.00  | LAT      | 5.47         | 2.45           | -0.55           | 3.31         |
| 50016.00 B08 | M-011215- asialoglyco    | 433.00    | ASGR2    | 1.55         | 6.37           | -1.42           | 6.01         |
| 50016.00 B09 | M-008015- leptin rece    | 3953.00   | LEPR     | 4.71         | 3.21           | -0.72           | 2.17         |
| 50016.00 B10 | M-017435- amphiregu      | 374.00    | AREG     | 14.69        | 6.77           | 1.50            | 3.52         |
| 50016.00 B11 | M-011720- leukemia ir    | 3976.00   | LIF      | 15.84        | 7.92           | 1.76            | 5.91         |
| 50016.00 B12 | M-017407- apolipopro     | 23780.00  | APOL2    | 5.86         | 2.06           | -0.46           | 1.76         |
| 50016.00 B13 | M-017168- leukocyte i    | 10859.00  | LILRB1   | 5.00         | 2.93           | -0.65           | 2.36         |
| 50016.00 B14 | M-007805- angiopoiet     | 23452.00  | ANGPTL2  | 2.72         | 5.20           | -1.16           | 2.69         |
| 50016.00 B15 | M-020017- leukocyte i    | 10288.00  | LILRB2   | 4.25         | 3.67           | -0.82           | 2.95         |
| 50016.00 B16 | M-007804- angiopoiet     | 9068.00   | ANGPTL1  | 13.35        | 5.43           | 1.21            | 3.35         |
| 50016.00 B17 | M-017091- leukocyte i    | 11006.00  | LILRB4   | 3.41         | 4.51           | -1.00           | 1.08         |
| 50016.00 B18 | M-006315- angiopoiet     | 285.00    | ANGPT2   | 6.89         | 1.03           | -0.23           | 3.75         |
| 50016.00 B19 | M-017687- leukocyte i    | 10990.00  | LILRB5   | 8.10         | 0.18           | 0.04            | 3.02         |
| 50016.00 B20 | M-007802- angiopoiet     | 284.00    | ANGPT1   | 5.61         | 2.31           | -0.51           | 1.64         |
| 50016.00 B21 | M-020750- limb regio     | 55716.00  | LMBR1L   | 3.48         | 4.44           | -0.99           | 1.82         |
| 50016.00 B23 | M-019609- low density    | 4037.00   | LRP3     | 9.53         | 1.61           | 0.36            | 6.95         |
| 50016.00 C02 | M-017895- CD300e mc      | 342510.00 | CD300E   | 5.35         | 2.57           | -0.57           | 4.63         |
| 50016.00 C04 | M-012449- leukocyte i    | 23547.00  | LILRA4   | 8.37         | 0.45           | 0.10            | 3.92         |
| 50016.00 C05 | M-012250- protein phi    | 5470.00   | PPEF2    | 3.97         | 3.95           | -0.88           | 3.90         |

|              |                         |                   |       |       |       |      |
|--------------|-------------------------|-------------------|-------|-------|-------|------|
| 50016.00 C06 | M-007981- interleukin   | 163702.00 IL28RA  | 2.48  | 5.44  | -1.21 | 3.32 |
| 50016.00 C07 | M-008281- protein ph    | 5495.00 PPM1B     | 3.68  | 4.24  | -0.94 | 3.51 |
| 50016.00 C08 | M-007976- interleukin   | 149233.00 IL23R   | 3.97  | 3.95  | -0.88 | 1.05 |
| 50016.00 C09 | M-008964- protein ph    | 22843.00 PPM1E    | 4.29  | 3.63  | -0.81 | 4.28 |
| 50016.00 C10 | M-007974- interleukin   | 116379.00 IL22RA2 | 3.17  | 4.75  | -1.06 | 4.11 |
| 50016.00 C11 | M-009544- protein ph    | 9647.00 PPM1F     | 7.27  | 0.65  | -0.14 | 1.33 |
| 50016.00 C12 | M-007969- interleukin   | 53832.00 IL20RA   | 4.90  | 3.02  | -0.67 | 4.66 |
| 50016.00 C13 | M-005264- protein ph    | 5496.00 PPM1G     | 3.27  | 4.65  | -1.03 | 2.79 |
| 50016.00 C14 | M-007961- interleukin   | 11141.00 IL1RAPL1 | 4.71  | 3.21  | -0.71 | 1.76 |
| 50016.00 C15 | M-008679- protein ph    | 151742.00 PPM1L   | 3.90  | 4.02  | -0.89 | 3.25 |
| 50016.00 C16 | M-007950- interleukin   | 8807.00 IL18RAP   | 5.12  | 2.80  | -0.62 | 1.31 |
| 50016.00 C17 | M-008718- protein ph    | 54704.00 PPM2C    | 14.49 | 6.57  | 1.46  | 3.71 |
| 50016.00 C18 | M-007933- interleukin   | 3597.00 IL13RA1   | 5.13  | 2.79  | -0.62 | 7.89 |
| 50016.00 C19 | M-008927- protein ph    | 5499.00 PPP1CA    | 8.02  | 0.10  | 0.02  | 0.91 |
| 50016.00 C20 | M-007928- interleukin   | 3590.00 IL11RA    | 5.91  | 2.01  | -0.45 | 1.39 |
| 50016.00 C21 | M-008685- protein ph    | 5500.00 PPP1CB    | 13.24 | 5.32  | 1.18  | 5.19 |
| 50016.00 C23 | M-018795- protein ph    | 84988.00 PPP1R16A | 8.83  | 0.91  | 0.20  | 1.92 |
| 50016.00 D02 | M-010991- anti-Muller   | 268.00 AMH        | 8.73  | 0.81  | 0.18  | 1.77 |
| 50016.00 D04 | M-004574- activated k   | 214.00 ALCAM      | 7.65  | 0.27  | -0.06 | 1.86 |
| 50016.00 D05 | M-003844- low density   | 4041.00 LRP5      | 21.91 | 13.99 | 3.11  | 2.80 |
| 50016.00 D06 | M-017362- A kinase (P   | 10142.00 AKAP9    | 13.40 | 5.48  | 1.22  | 4.04 |
| 50016.00 D07 | M-010608- basal cell a  | 4059.00 BCAM      | 12.54 | 4.62  | 1.03  | 3.45 |
| 50016.00 D08 | M-017300- A kinase (P   | 11216.00 AKAP10   | 4.43  | 3.49  | -0.78 | 0.62 |
| 50016.00 D09 | M-008024- CD163 mol     | 283316.00 CD163L1 | 6.82  | 1.10  | -0.25 | 3.61 |
| 50016.00 D10 | M-011204- agouti rela   | 181.00 AGRP       | 3.67  | 4.25  | -0.95 | 1.30 |
| 50016.00 D11 | M-010611- mannose-6     | 4074.00 M6PR      | 6.72  | 1.20  | -0.27 | 5.14 |
| 50016.00 D12 | M-011199- adrenomec     | 133.00 ADM        | 5.63  | 2.29  | -0.51 | 2.16 |
| 50016.00 D13 | M-013568- mastermin     | 84441.00 MAML2    | 4.69  | 3.23  | -0.72 | 1.81 |
| 50016.00 D14 | M-011403- zona pelluc   | 7783.00 ZP2       | 7.31  | 0.61  | -0.14 | 2.81 |
| 50016.00 D15 | M-008025- macrophag     | 8685.00 MARCO     | 8.81  | 0.89  | 0.20  | 4.39 |
| 50016.00 D16 | M-008108- interleukin   | 9466.00 IL27RA    | 8.29  | 0.37  | 0.08  | 4.46 |
| 50016.00 D17 | M-010523- mutated in    | 4163.00 MCC       | 6.76  | 1.16  | -0.26 | 6.42 |
| 50016.00 D18 | M-008592- wingless-ty   | 7484.00 WNT9B     | 3.18  | 4.74  | -1.05 | 1.99 |
| 50016.00 D19 | M-004570- CD46 mole     | 4179.00 CD46      | 9.60  | 1.68  | 0.37  | 6.80 |
| 50016.00 D20 | M-008392- wingless-ty   | 7483.00 WNT9A     | 4.17  | 3.75  | -0.83 | 1.01 |
| 50016.00 D21 | M-003908- myeloproli    | 4352.00 MPL       | 10.39 | 2.47  | 0.55  | 2.34 |
| 50016.00 D23 | M-008033- progesterin a | 164091.00 PAQR7   | 4.72  | 3.20  | -0.71 | 1.91 |
| 50016.00 E02 | M-009122- taste recep   | 353164.00 TAS2R42 | 7.71  | 0.21  | -0.05 | 0.41 |
| 50016.00 E04 | M-017490- HLA-G histi   | 3135.00 HLA-G     | 16.28 | 8.36  | 1.86  | 4.83 |
| 50016.00 E05 | M-014386- protein ph    | 79660.00 PPP1R3B  | 4.73  | 3.19  | -0.71 | 0.70 |
| 50016.00 E06 | M-012106- major histc   | 3133.00 HLA-E     | 3.86  | 4.06  | -0.90 | 1.71 |
| 50016.00 E07 | M-021439- protein ph    | 5509.00 PPP1R3D   | 7.29  | 0.63  | -0.14 | 1.51 |
| 50016.00 E08 | M-013204- major histc   | 3125.00 HLA-DRB3  | 13.13 | 5.21  | 1.16  | 0.95 |
| 50016.00 E09 | M-010259- protein ph    | 5518.00 PPP2R1A   | 6.19  | 1.73  | -0.38 | 2.54 |

|              |                        |           |          |       |      |       |      |
|--------------|------------------------|-----------|----------|-------|------|-------|------|
| 50016.00 E10 | M-013296- major histc  | 3122.00   | HLA-DRA  | 4.81  | 3.12 | -0.69 | 1.24 |
| 50016.00 E11 | M-017592- protein phi  | 5519.00   | PPP2R1B  | 3.90  | 4.02 | -0.89 | 0.64 |
| 50016.00 E12 | M-011687- major histc  | 3119.00   | HLA-DQB1 | 10.34 | 2.42 | 0.54  | 3.62 |
| 50016.00 E13 | M-009352- protein phi  | 5525.00   | PPP2R5A  | 7.40  | 0.52 | -0.12 | 2.22 |
| 50016.00 E14 | M-013228- major histc  | 3117.00   | HLA-DQA1 | 11.29 | 3.37 | 0.75  | 4.04 |
| 50016.00 E15 | M-009366- protein phi  | 5526.00   | PPP2R5B  | 13.37 | 5.45 | 1.21  | 6.73 |
| 50016.00 E16 | M-013229- major histc  | 3115.00   | HLA-DPB1 | 3.99  | 3.93 | -0.87 | 1.21 |
| 50016.00 E17 | M-009433- protein phi  | 5527.00   | PPP2R5C  | 7.19  | 0.73 | -0.16 | 4.37 |
| 50016.00 E18 | M-011686- major histc  | 3112.00   | HLA-DOB  | 4.54  | 3.38 | -0.75 | 3.00 |
| 50016.00 E19 | M-009799- protein phi  | 5528.00   | PPP2R5D  | 10.06 | 2.14 | 0.48  | 3.96 |
| 50016.00 E20 | M-019456- major histc  | 3111.00   | HLA-DOA  | 8.65  | 0.73 | 0.16  | 5.49 |
| 50016.00 E21 | M-008531- protein phi  | 5529.00   | PPP2R5E  | 3.18  | 4.74 | -1.06 | 3.33 |
| 50016.00 E23 | M-010005- protein phi  | 5533.00   | PPP3CC   | 5.09  | 2.83 | -0.63 | 2.17 |
| 50016.00 F02 | M-009409- wingless-ty  | 7479.00   | WNT8B    | 3.89  | 4.03 | -0.90 | 1.28 |
| 50016.00 F04 | M-009331- wingless-ty  | 7478.00   | WNT8A    | 6.17  | 1.75 | -0.39 | 1.39 |
| 50016.00 F05 | M-012214- membrane     | 931.00    | MS4A1    | 9.63  | 1.71 | 0.38  | 3.65 |
| 50016.00 F06 | M-003722- wingless-ty  | 7477.00   | WNT7B    | 3.69  | 4.23 | -0.94 | 1.02 |
| 50016.00 F07 | M-012893- membrane     | 64231.00  | MS4A6A   | 6.82  | 1.10 | -0.25 | 1.24 |
| 50016.00 F08 | M-009860- wingless-ty  | 7475.00   | WNT6     | 4.09  | 3.83 | -0.85 | 1.90 |
| 50016.00 F09 | M-003644- membrane     | 58475.00  | MS4A7    | 3.06  | 4.86 | -1.08 | 2.09 |
| 50016.00 F10 | M-009761- wingless-ty  | 81029.00  | WNT5B    | 4.62  | 3.30 | -0.73 | 2.49 |
| 50016.00 F11 | M-008767- membrane     | 83661.00  | MS4A8B   | 8.38  | 0.46 | 0.10  | 3.75 |
| 50016.00 F12 | M-008659- wingless-ty  | 54361.00  | WNT4     | 2.30  | 5.62 | -1.25 | 1.11 |
| 50016.00 F13 | M-008035- macrophag    | 4481.00   | MSR1     | 4.79  | 3.13 | -0.70 | 3.60 |
| 50016.00 F14 | M-008538- wingless-ty  | 89780.00  | WNT3A    | 8.56  | 0.64 | 0.14  | 7.07 |
| 50016.00 F15 | M-016944- family with  | 23625.00  | FAM89B   | 3.95  | 3.97 | -0.88 | 1.11 |
| 50016.00 F16 | M-009712- wingless-ty  | 7473.00   | WNT3     | 10.31 | 2.39 | 0.53  | 9.17 |
| 50016.00 F17 | M-011089- myocilin, ti | 4653.00   | MYOC     | 6.21  | 1.71 | -0.38 | 3.97 |
| 50016.00 F18 | M-010345- wingless-ty  | 7482.00   | WNT2B    | 5.34  | 2.58 | -0.57 | 1.83 |
| 50016.00 F19 | M-020866- natural cyt  | 9437.00   | NCR1     | 6.93  | 0.99 | -0.22 | 2.60 |
| 50016.00 F20 | M-003938- wingless-ty  | 7472.00   | WNT2     | 7.46  | 0.46 | -0.10 | 2.36 |
| 50016.00 F21 | M-016894- natural cyt  | 259197.00 | NCR3     | 11.07 | 3.15 | 0.70  | 4.05 |
| 50016.00 F23 | M-009340- nerve grow   | 4804.00   | NGFR     | 4.48  | 3.44 | -0.76 | 2.73 |
| 50016.00 G02 | M-013238- major histc  | 3109.00   | HLA-DMB  | 3.16  | 4.76 | -1.06 | 8.78 |
| 50016.00 G04 | M-017513- major histc  | 3107.00   | HLA-C    | 4.04  | 3.88 | -0.86 | 4.33 |
| 50016.00 G05 | M-019912- protein phi  | 9989.00   | PPP4R1   | 3.20  | 4.72 | -1.05 | 3.29 |
| 50016.00 G06 | M-013203- major histc  | 3106.00   | HLA-B    | 5.57  | 2.35 | -0.52 | 1.70 |
| 50016.00 G07 | M-009259- protein phi  | 5536.00   | PPP5C    | 7.96  | 0.04 | 0.01  | 2.79 |
| 50016.00 G08 | M-012850- major histc  | 3105.00   | HLA-A    | 6.18  | 1.74 | -0.39 | 1.51 |
| 50016.00 G09 | M-009935- protein phi  | 5537.00   | PPP6C    | 5.18  | 2.74 | -0.61 | 0.75 |
| 50016.00 G10 | M-011051- hemochror    | 3077.00   | HFE      | 3.60  | 4.32 | -0.96 | 1.88 |
| 50016.00 G11 | M-006333- protein tyr  | 7803.00   | PTP4A1   | 7.25  | 0.67 | -0.15 | 4.64 |
| 50016.00 G12 | M-016696- hepatitis A  | 84868.00  | HAVCR2   | 5.58  | 2.34 | -0.52 | 8.84 |
| 50016.00 G13 | M-009078- protein tyr  | 8073.00   | PTP4A2   | 7.73  | 0.19 | -0.04 | 2.70 |

|              |                       |           |         |       |       |       |       |
|--------------|-----------------------|-----------|---------|-------|-------|-------|-------|
| 50016.00 G14 | M-007919- glutamate   | 81488.00  | GRINL1A | 15.83 | 7.91  | 1.76  | 1.56  |
| 50016.00 G15 | M-006859- protein tyr | 11156.00  | PTP4A3  | 9.42  | 1.50  | 0.33  | 3.26  |
| 50016.00 G16 | M-006199- glutamate   | 116443.00 | GRIN3A  | 9.16  | 1.24  | 0.27  | 3.02  |
| 50016.00 G17 | M-008584- protein tyr | 138639.00 | PTPDC1  | 6.15  | 1.77  | -0.39 | 1.84  |
| 50016.00 G18 | M-006193- glutamate   | 2901.00   | GRIK5   | 13.41 | 5.49  | 1.22  | 2.37  |
| 50016.00 G19 | M-008742- protein tyr | 9200.00   | PTPLA   | 12.35 | 4.43  | 0.98  | 1.72  |
| 50016.00 G20 | M-006192- glutamate   | 2900.00   | GRIK4   | 30.56 | 22.64 | 5.03  | 4.48  |
| 50016.00 G21 | M-027184- protein tyr | 201562.00 | PTPLB   | 26.37 | 18.45 | 4.10  | 1.97  |
| 50016.00 G23 | M-003529- protein tyr | 5770.00   | PTPN1   | 16.19 | 8.27  | 1.84  | 0.94  |
| 50016.00 H02 | M-010821- wingless-ty | 51384.00  | WNT16   | 6.14  | 1.78  | -0.40 | 6.48  |
| 50016.00 H04 | M-009474- wingless-ty | 7481.00   | WNT11   | 2.94  | 4.98  | -1.11 | 1.24  |
| 50016.00 H05 | M-008045- reticulon 4 | 349667.00 | RTN4RL2 | 1.23  | 6.69  | -1.49 | 3.19  |
| 50016.00 H06 | M-007759- wingless-ty | 7480.00   | WNT10B  | 1.82  | 6.10  | -1.36 | 1.56  |
| 50016.00 H07 | M-008046- reticulon 4 | 146760.00 | RTN4RL1 | 6.65  | 1.27  | -0.28 | 11.70 |
| 50016.00 H08 | M-008232- wingless-ty | 80326.00  | WNT10A  | 7.60  | 0.32  | -0.07 | 3.33  |
| 50016.00 H09 | M-016694- CD300 mol   | 146722.00 | CD300LF | 8.06  | 0.14  | 0.03  | 8.40  |
| 50016.00 H10 | M-003937- wingless-ty | 7471.00   | WNT1    | 6.40  | 1.52  | -0.34 | 4.15  |
| 50016.00 H11 | M-008047- Niemann-P   | 4864.00   | NPC1    | 13.04 | 5.12  | 1.14  | 4.11  |
| 50016.00 H12 | M-012141- WAS prote   | 10163.00  | WASF2   | 4.25  | 3.67  | -0.82 | 11.20 |
| 50016.00 H13 | M-012507- neuronal p  | 23467.00  | NPTXR   | 4.21  | 3.71  | -0.82 | 4.84  |
| 50016.00 H14 | M-010628- unc-5 hom   | 8633.00   | UNC5C   | 5.23  | 2.69  | -0.60 | 2.65  |
| 50016.00 H15 | M-017721- neuropilin  | 8828.00   | NRP2    | 10.84 | 2.92  | 0.65  | 3.95  |
| 50016.00 H16 | M-021392- unc-5 hom   | 219699.00 | UNC5B   | 8.25  | 0.33  | 0.07  | 2.52  |
| 50016.00 H17 | M-017920- neutral spf | 8439.00   | NSMAF   | 17.28 | 9.36  | 2.08  | 4.34  |
| 50016.00 H18 | M-012607- TYRO prote  | 7305.00   | TYROBP  | 6.91  | 1.01  | -0.22 | 3.41  |
| 50016.00 H19 | M-017889- neuronal P  | 266743.00 | NPAS4   | 9.30  | 1.38  | 0.31  | 2.86  |
| 50016.00 H20 | M-005263- transient r | 162514.00 | TRPV3   | 14.56 | 6.64  | 1.48  | 8.86  |
| 50016.00 H21 | M-012922- osteoclast- | 126014.00 | OSCAR   | 4.44  | 3.48  | -0.77 | 1.39  |
| 50016.00 H23 | M-008050- oncostatin  | 9180.00   | OSMR    | 6.93  | 0.99  | -0.22 | 1.62  |
| 50016.00 I02 | M-006191- glutamate   | 2899.00   | GRIK3   | 3.64  | 4.28  | -0.95 | 4.80  |
| 50016.00 I04 | M-006190- glutamate   | 2898.00   | GRIK2   | 53.73 | 45.81 | 10.18 | 5.45  |
| 50016.00 I05 | M-003947- protein tyr | 5781.00   | PTPN11  | 6.70  | 1.22  | -0.27 | 6.25  |
| 50016.00 I06 | M-006188- glutamate   | 2895.00   | GRID2   | 13.35 | 5.43  | 1.21  | 7.43  |
| 50016.00 I07 | M-008064- protein tyr | 5782.00   | PTPN12  | 10.93 | 3.01  | 0.67  | 6.53  |
| 50016.00 I08 | M-006187- glutamate   | 2893.00   | GRIA4   | 5.88  | 2.04  | -0.45 | 3.40  |
| 50016.00 I09 | M-008065- protein tyr | 5783.00   | PTPN13  | 20.84 | 12.92 | 2.87  | 10.91 |
| 50016.00 I10 | M-006186- glutamate   | 2892.00   | GRIA3   | 9.78  | 1.86  | 0.41  | 9.30  |
| 50016.00 I11 | M-009379- protein tyr | 11099.00  | PTPN21  | 9.84  | 1.92  | 0.43  | 4.81  |
| 50016.00 I12 | M-006185- glutamate   | 2891.00   | GRIA2   | 7.57  | 0.35  | -0.08 | 4.64  |
| 50016.00 I13 | M-008066- protein tyr | 26191.00  | PTPN22  | 4.09  | 3.83  | -0.85 | 2.77  |
| 50016.00 I14 | M-006184- glutamate   | 2890.00   | GRIA1   | 8.07  | 0.15  | 0.03  | 8.33  |
| 50016.00 I15 | M-009417- protein tyr | 25930.00  | PTPN23  | 5.38  | 2.54  | -0.57 | 5.55  |
| 50016.00 I16 | M-012701- growth fac  | 2886.00   | GRB7    | 8.39  | 0.47  | 0.10  | 3.67  |
| 50016.00 I17 | M-009372- protein tyr | 5774.00   | PTPN3   | 8.16  | 0.24  | 0.05  | 3.88  |

|              |                        |                   |              |       |       |              |
|--------------|------------------------|-------------------|--------------|-------|-------|--------------|
| 50016.00 I18 | M-019810- growth fac   | 2888.00 GRB14     | 9.16         | 1.24  | 0.27  | 6.43         |
| 50016.00 I19 | M-009489- protein tyr  | 5775.00 PTPN4     | <u>9.94</u>  | 2.02  | 0.45  | <u>13.43</u> |
| 50016.00 I20 | M-015313- growth fac   | 2887.00 GRB10     | 11.08        | 3.16  | 0.70  | 6.55         |
| 50016.00 I21 | M-008394- protein tyr  | 5778.00 PTPN7     | 15.96        | 8.04  | 1.79  | 8.35         |
| 50016.00 I23 | M-008832- protein tyr  | 5780.00 PTPN9     | 10.70        | 2.78  | 0.62  | 7.63         |
| 50016.00 J02 | M-004194- transient r  | 51393.00 TRPV2    | 4.25         | 3.67  | -0.82 | 1.00         |
| 50016.00 J04 | M-006515- transient r  | 54795.00 TRPM4    | 13.04        | 5.12  | 1.14  | 10.12        |
| 50016.00 J05 | M-004435- programm     | 5133.00 PDCD1     | 2.52         | 5.40  | -1.20 | 1.87         |
| 50016.00 J06 | M-006512- transient r  | 57113.00 TRPC7    | 14.24        | 6.32  | 1.40  | 9.75         |
| 50016.00 J07 | M-011350- period hon   | 5187.00 PER1      | 13.29        | 5.37  | 1.19  | 6.95         |
| 50016.00 J08 | M-006510- transient r  | 7223.00 TRPC4     | 10.43        | 2.51  | 0.56  | 2.86         |
| 50016.00 J09 | M-012977- period hon   | 8864.00 PER2      | 5.69         | 2.23  | -0.50 | 2.80         |
| 50016.00 J10 | M-017772- CD300 mol    | 124599.00 CD300LB | 15.99        | 8.07  | 1.79  | 6.58         |
| 50016.00 J11 | M-017225- polycystic l | 5314.00 PKHD1     | 13.18        | 5.26  | 1.17  | 3.73         |
| 50016.00 J12 | M-021235- triggering r | 54209.00 TREM2    | 10.21        | 2.29  | 0.51  | 16.55        |
| 50016.00 J13 | M-006388- plasminoge   | 5329.00 PLAUR     | 13.32        | 5.40  | 1.20  | 7.78         |
| 50016.00 J14 | M-017974- triggering r | 54210.00 TREM1    | 4.42         | 3.50  | -0.78 | 2.68         |
| 50016.00 J15 | M-020933- plexin A3    | 55558.00 PLXNA3   | 7.83         | 0.09  | -0.02 | 8.68         |
| 50016.00 J16 | M-004452- TNFRSF1A-    | 8717.00 TRADD     | 6.68         | 1.24  | -0.28 | 1.87         |
| 50016.00 J17 | M-007752- plexin B3    | 5365.00 PLXNB3    | 9.48         | 1.56  | 0.35  | 5.98         |
| 50016.00 J18 | M-004753- tumor prot   | 7159.00 TP53BP2   | 8.44         | 0.52  | 0.12  | 8.21         |
| 50016.00 J19 | M-015670- proline-ricl | 55629.00 PNRC2    | 16.95        | 9.03  | 2.01  | 10.91        |
| 50016.00 J20 | M-008105- tumor necr   | 3604.00 TNFRSF9   | 6.47         | 1.45  | -0.32 | 3.82         |
| 50016.00 J21 | M-015166- transmeml    | 114908.00 TMEM123 | 17.60        | 9.68  | 2.15  | 11.66        |
| 50016.00 J23 | M-014182- proline-ricl | 5544.00 PRB3      | 7.34         | 0.58  | -0.13 | 6.10         |
| 50016.00 K02 | M-017406- GRB2-relat   | 9402.00 GRAP2     | 9.95         | 2.03  | 0.45  | 4.38         |
| 50016.00 K04 | M-012285- GRB2-relat   | 10750.00 GRAP     | 4.02         | 3.90  | -0.87 | 3.77         |
| 50016.00 K05 | M-004519- protein tyr  | 5786.00 PTPRA     | 8.76         | 0.84  | 0.19  | 7.52         |
| 50016.00 K06 | M-005546- G protein-c  | 350383.00 GPR142  | 7.04         | 0.88  | -0.20 | 4.78         |
| 50016.00 K07 | M-004994- protein tyr  | 5787.00 PTPRB     | 7.63         | 0.29  | -0.06 | 3.20         |
| 50016.00 K08 | M-005645- G protein-c  | 64582.00 GPR135   | 12.19        | 4.27  | 0.95  | 7.43         |
| 50016.00 K09 | M-008067- protein tyr  | 5788.00 PTPRC     | <u>23.44</u> | 15.52 | 3.45  | <u>13.57</u> |
| 50016.00 K10 | M-010980- golgi SNAP   | 9570.00 GOSR2     | 7.59         | 0.33  | -0.07 | 8.25         |
| 50016.00 K11 | M-008527- protein tyr  | 5789.00 PTPRD     | <u>21.59</u> | 13.67 | 3.04  | <u>15.25</u> |
| 50016.00 K12 | M-011959- golgi SNAP   | 9527.00 GOSR1     | 9.51         | 1.59  | 0.35  | 53.01        |
| 50016.00 K13 | M-008068- protein tyr  | 5791.00 PTPRE     | 18.50        | 10.58 | 2.35  | 9.59         |
| 50016.00 K14 | M-011042- gap junctio  | 2697.00 GJA1      | <u>22.51</u> | 14.59 | 3.24  | <u>15.67</u> |
| 50016.00 K15 | M-008375- protein tyr  | 5792.00 PTPRF     | 8.20         | 0.28  | 0.06  | 3.74         |
| 50016.00 K16 | M-010402- growth hor   | 2690.00 GHR       | 10.67        | 2.75  | 0.61  | 6.04         |
| 50016.00 K17 | M-009448- protein tyr  | 5794.00 PTPRH     | <u>29.74</u> | 21.82 | 4.85  | <u>11.09</u> |
| 50016.00 K18 | M-007916- GDNF fami    | 64096.00 GFRA4    | <u>27.12</u> | 19.20 | 4.27  | <u>15.76</u> |
| 50016.00 K19 | M-004204- protein tyr  | 5796.00 PTPRK     | 14.19        | 6.27  | 1.39  | 9.47         |
| 50016.00 K20 | M-007913- GDNF fami    | 2674.00 GFRA1     | 15.02        | 7.10  | 1.58  | 9.22         |
| 50016.00 K21 | M-006326- protein tyr  | 5797.00 PTPRM     | 14.21        | 6.29  | 1.40  | 8.49         |



|              |                         |                    |              |       |       |              |
|--------------|-------------------------|--------------------|--------------|-------|-------|--------------|
| 50016.00 K23 | M-009315- protein tyr   | 5798.00 PTPRN      | 34.02        | 26.10 | 5.80  | 3.84         |
| 50016.00 L02 | M-008104- tumor necr    | 943.00 TNFRSF8     | 4.74         | 3.18  | -0.71 | 5.10         |
| 50016.00 L04 | M-003776- Fas (TNF re   | 355.00 FAS         | 3.53         | 4.39  | -0.98 | 3.58         |
| 50016.00 L05 | M-017326- protein C r   | 10544.00 PROCR     | 5.19         | 2.73  | -0.61 | 3.45         |
| 50016.00 L06 | M-008101- CD40 mole     | 958.00 CD40        | 6.93         | 0.99  | -0.22 | 5.66         |
| 50016.00 L07 | M-021388- pleckstrin a  | 5662.00 PSD        | 5.28         | 2.64  | -0.59 | 2.73         |
| 50016.00 L08 | M-004450- tumor necr    | 27242.00 TNFRSF21  | 7.14         | 0.78  | -0.17 | 10.18        |
| 50016.00 L09 | M-008062- seizure rel   | 26470.00 SEZ6L2    | 4.85         | 3.07  | -0.68 | 6.32         |
| 50016.00 L10 | M-008099- tumor necr    | 84957.00 TNFRSF19L | 11.50        | 3.58  | 0.79  | 9.51         |
| 50016.00 L11 | M-003924- patched hc    | 5727.00 PTCH1      | 10.68        | 2.76  | 0.61  | 7.29         |
| 50016.00 L12 | M-011217- tumor necr    | 608.00 TNFRSF17    | 2.16         | 5.76  | -1.28 | 12.20        |
| 50016.00 L13 | M-008063- patched hc    | 8643.00 PTCH2      | 5.25         | 2.67  | -0.59 | 4.36         |
| 50016.00 L14 | M-008095- tumor necr    | 23495.00 TNFRSF13E | 4.60         | 3.32  | -0.74 | 11.20        |
| 50016.00 L15 | M-015323- poliovirus r  | 5817.00 PVR        | 6.81         | 1.11  | -0.25 | 5.79         |
| 50016.00 L16 | M-008093- tumor necr    | 8792.00 TNFRSF11A  | 3.95         | 3.97  | -0.88 | 8.15         |
| 50016.00 L17 | M-003699- poliovirus r  | 5819.00 PVRL2      | 7.22         | 0.70  | -0.16 | 10.20        |
| 50016.00 L18 | M-008092- tumor necr    | 8793.00 TNFRSF10C  | 14.62        | 6.70  | 1.49  | 16.60        |
| 50016.00 L19 | M-003701- receptor (C   | 10266.00 RAMP2     | 7.49         | 0.43  | -0.10 | 11.06        |
| 50016.00 L20 | M-008091- tumor necr    | 8794.00 TNFRSF10C  | 16.51        | 8.59  | 1.91  | 9.15         |
| 50016.00 L21 | M-003702- receptor (C   | 10268.00 RAMP3     | 13.94        | 6.02  | 1.34  | 13.66        |
| 50016.00 L23 | M-006995- ubiquitin ir  | 51720.00 UIMC1     | 7.90         | 0.02  | -0.01 | 3.57         |
| 50016.00 M02 | M-012221- follistatin   | 10468.00 FST       | 5.95         | 1.97  | -0.44 | 8.68         |
| 50016.00 M04 | M-014978- Fc receptoi   | 84824.00 FCRLA     | 5.57         | 2.35  | -0.52 | 2.96         |
| 50016.00 M05 | M-008070- protein tyr   | 5799.00 PTPRN2     | 6.11         | 1.81  | -0.40 | 5.66         |
| 50016.00 M06 | M-020219- FGF recept    | 27315.00 FRAG1     | 6.10         | 1.82  | -0.40 | 6.60         |
| 50016.00 M07 | M-008500- protein tyr   | 5800.00 PTPRO      | 7.15         | 0.77  | -0.17 | 6.18         |
| 50016.00 M08 | M-020584- feline leuki  | 28982.00 FLVCR     | 13.10        | 5.18  | 1.15  | 8.23         |
| 50016.00 M09 | M-009662- protein tyr   | 5802.00 PTPRS      | 7.05         | 0.87  | -0.19 | 4.56         |
| 50016.00 M10 | M-016705- Fc receptoi   | 115352.00 FCRL3    | 6.02         | 1.90  | -0.42 | 4.73         |
| 50016.00 M11 | M-009685- protein tyr   | 5803.00 PTPRZ1     | 15.28        | 7.36  | 1.64  | 10.43        |
| 50016.00 M12 | M-018732- Fc receptoi   | 115350.00 FCRL1    | 9.83         | 1.91  | 0.42  | 5.62         |
| 50016.00 M13 | M-009782- RNA guany     | 8732.00 RNGTT      | <u>14.37</u> | 6.45  | 1.43  | 13.87        |
| 50016.00 M14 | M-004462- coagulatioi   | 2152.00 F3         | 4.08         | 3.84  | -0.85 | 4.62         |
| 50016.00 M15 | M-008083- slingshot h   | 54434.00 SSH1      | 9.80         | 1.88  | 0.42  | <u>11.16</u> |
| 50016.00 M16 | M-014034- ectodyspla    | 10913.00 EDAR      | 9.63         | 1.71  | 0.38  | 6.91         |
| 50016.00 M17 | M-008084- slingshot h   | 85464.00 SSH2      | <u>19.26</u> | 11.34 | 2.52  | <u>19.32</u> |
| 50016.00 M18 | M-012282- emopamil      | 10682.00 EBP       | 10.16        | 2.24  | 0.50  | 4.68         |
| 50016.00 M19 | M-008937- slingshot h   | 54961.00 SSH3      | 7.95         | 0.03  | 0.01  | 4.75         |
| 50016.00 M20 | M-003880- deleted in    | 1630.00 DCC        | 6.88         | 1.04  | -0.23 | 5.16         |
| 50016.00 M21 | M-009571- serine/thre   | 6815.00 STYX       | 13.25        | 5.33  | 1.18  | 6.07         |
| 50016.00 M23 | M-017008- PTC7 prote    | 160760.00 PPTC7    | 12.21        | 4.29  | 0.95  | 5.32         |
| 50016.00 N02 | M-004066- toll-like rec | 54106.00 TLR9      | 4.18         | 3.74  | -0.83 | 4.30         |
| 50016.00 N04 | M-004714- toll-like rec | 51284.00 TLR7      | 3.92         | 4.00  | -0.89 | 2.84         |
| 50016.00 N05 | M-009513- regulator c   | 26575.00 RGS17     | 4.79         | 3.13  | -0.70 | 5.53         |

|              |                         |                    |       |       |       |       |
|--------------|-------------------------|--------------------|-------|-------|-------|-------|
| 50016.00 N06 | M-008089- toll-like rec | 7100.00 TLR5       | 4.20  | 3.72  | -0.83 | 2.98  |
| 50016.00 N07 | M-011381- roundabou     | 6091.00 ROBO1      | 3.12  | 4.80  | -1.07 | 0.52  |
| 50016.00 N08 | M-008087- toll-like rec | 81793.00 TLR10     | 10.71 | 2.79  | 0.62  | 5.63  |
| 50016.00 N09 | M-008075- reticulon 4   | 65078.00 RTN4R     | 13.91 | 5.99  | 1.33  | 5.11  |
| 50016.00 N10 | M-004713- toll-interle  | 114609.00 TIRAP    | 13.22 | 5.30  | 1.18  | 4.81  |
| 50016.00 N11 | M-011556- src kinase    | 8935.00 SKAP2      | 10.89 | 2.97  | 0.66  | 3.38  |
| 50016.00 N12 | M-015979- mannose-6     | 10226.00 M6PRBP1   | 5.72  | 2.20  | -0.49 | 12.61 |
| 50016.00 N13 | M-010592- scavenger     | 949.00 SCARB1      | 6.78  | 1.14  | -0.25 | 2.24  |
| 50016.00 N14 | M-006903- transformin   | 9392.00 TGFBRAP1   | 9.82  | 1.90  | 0.42  | 2.83  |
| 50016.00 N15 | M-013710- secretogra    | 29106.00 SCG3      | 60.68 | 52.76 | 11.73 | 19.15 |
| 50016.00 N16 | M-016366- TRK-fused     | 10342.00 TFG       | 15.16 | 7.24  | 1.61  | 5.54  |
| 50016.00 N17 | M-012477- neuroplast    | 27020.00 NPTN      | 10.06 | 2.14  | 0.47  | 6.46  |
| 50016.00 N18 | M-018451- taste recep   | 5726.00 TAS2R38    | 16.09 | 8.17  | 1.82  | 6.41  |
| 50016.00 N19 | M-020091- sema domi     | 10371.00 SEMA3A    | 14.28 | 6.36  | 1.41  | 5.98  |
| 50016.00 N20 | M-010609- tumor-assc    | 4070.00 TACSTD2    | 12.66 | 4.74  | 1.05  | 3.74  |
| 50016.00 N21 | M-017644- sema domi     | 6405.00 SEMA3F     | 11.86 | 3.94  | 0.88  | 5.68  |
| 50016.00 N23 | M-019442- sema domi     | 10507.00 SEMA4D    | 10.67 | 2.75  | 0.61  | 2.26  |
| 50016.00 O02 | M-003650- coxsackie v   | 1525.00 CXADR      | 14.18 | 6.26  | 1.39  | 5.66  |
| 50016.00 O04 | M-007864- colony stir   | 1438.00 CSF2RA     | 11.14 | 3.22  | 0.71  | 7.08  |
| 50016.00 O05 | M-009977- tensin like   | 23371.00 TENC1     | 13.39 | 5.47  | 1.22  | 5.24  |
| 50016.00 O06 | M-015312- cytokine re   | 64109.00 CRLF2     | 5.90  | 2.02  | -0.45 | 3.08  |
| 50016.00 O07 | M-023692- translocase   | 92609.00 TIMM50    | 13.19 | 5.27  | 1.17  | 9.26  |
| 50016.00 O08 | M-010503- v-crk sarco   | 1398.00 CRK        | 12.23 | 4.31  | 0.96  | 10.19 |
| 50016.00 O09 | M-008745- transmeml     | 7179.00 TPTE       | 10.42 | 2.50  | 0.56  | 9.79  |
| 50016.00 O10 | M-007856- ciliary neur  | 1271.00 CNTFR      | 6.97  | 0.95  | -0.21 | 2.70  |
| 50016.00 O11 | M-008039- myotubula     | 8897.00 MTMR3      | 7.84  | 0.08  | -0.02 | 5.32  |
| 50016.00 O12 | M-017088- CD300c mc     | 10871.00 CD300C    | 20.54 | 12.62 | 2.80  | 17.19 |
| 50016.00 O13 | M-009574- protein phi   | 5494.00 PPM1A      | 15.57 | 7.65  | 1.70  | 15.82 |
| 50016.00 O14 | M-011611- clathrin, he  | 8218.00 CLTCL1     | 5.47  | 2.45  | -0.54 | 7.94  |
| 50016.00 O15 | M-009704- protein phi   | 5532.00 PPP3CB     | 11.97 | 4.05  | 0.90  | 12.23 |
| 50016.00 O16 | M-013612- claudin 4     | 1364.00 CLDN4      | 11.45 | 3.53  | 0.78  | 1.38  |
| 50016.00 O17 | M-004770- mitogen-ac    | 10454.00 MAP3K7IP1 | 11.18 | 3.26  | 0.72  | 9.82  |
| 50016.00 O18 | M-017303- claudin 3     | 1365.00 CLDN3      | 0.98  | 6.94  | -1.54 | 4.88  |
| 50016.00 O19 | M-003022- protein phi   | 5521.00 PPP2R2B    | 18.94 | 11.02 | 2.45  | 15.75 |
| 50016.00 O20 | M-009385- protein tyr   | 26469.00 PTPN18    | 7.71  | 0.21  | -0.05 | 7.88  |
| 50016.00 O21 | M-009705- multiple in   | 9562.00 MINPP1     | 9.00  | 1.08  | 0.24  | 3.34  |
| 50016.00 O23 | M-012572- catenin (ca   | 1500.00 CTNND1     | 12.49 | 4.57  | 1.01  | 3.99  |
| 50016.00 P02 | M-005152- stathmin 1    | 3925.00 STMN1      | 6.35  | 1.57  | -0.35 | 12.47 |
| 50016.00 P04 | M-011423- signal tran   | 8027.00 STAM       | 7.83  | 0.09  | -0.02 | 4.93  |
| 50016.00 P05 | M-013211- sema domi     | 10501.00 SEMA6B    | 8.71  | 0.79  | 0.17  | 4.22  |
| 50016.00 P06 | M-016490- Fc receptoi   | 79368.00 FCRL2     | 27.08 | 19.16 | 4.26  | 6.95  |
| 50016.00 P07 | M-004600- secreted fr   | 6422.00 SFRP1      | 11.87 | 3.95  | 0.88  | 2.70  |
| 50016.00 P08 | M-004722- sortilin-rel  | 6653.00 SORL1      | 33.33 | 25.41 | 5.65  | 7.94  |
| 50016.00 P09 | M-024062- secreted fr   | 6423.00 SFRP2      | 9.57  | 1.65  | 0.37  | 4.30  |

|              |                                   |           |           |       |       |       |      |
|--------------|-----------------------------------|-----------|-----------|-------|-------|-------|------|
| 50016.00 P10 | M-017335- sorting nex             | 51429.00  | SNX9      | 12.42 | 4.50  | 1.00  | 1.42 |
| 50016.00 P11 | M-011388- secreted fr             | 6424.00   | SFRP4     | 10.39 | 2.47  | 0.55  | 1.81 |
| 50016.00 P12 | M-013423- SLAM fami               | 114836.00 | SLAMF6    | 10.54 | 2.62  | 0.58  | 2.11 |
| 50016.00 P13 | M-011389- secreted fr             | 6425.00   | SFRP5     | 8.65  | 0.73  | 0.16  | 4.76 |
| 50016.00 P14 | M-010815- Src-like-adi            | 6503.00   | SLA       | 8.22  | 0.30  | 0.07  | 1.34 |
| 50016.00 P15 | M-005725- G protein-c             | 51463.00  | GPR89A    | 30.82 | 22.90 | 5.09  | 2.80 |
| 50016.00 P16 | M-012262- SIVA1, apo              | 10572.00  | SIVA1     | 13.01 | 5.09  | 1.13  | 2.96 |
| 50016.00 P17 | M-010430- SH2 domai               | 4068.00   | SH2D1A    | 18.19 | 10.27 | 2.28  | 3.28 |
| 50016.00 P18 | M-017022- SHC (Src hc             | 53358.00  | SHC3      | 10.84 | 2.92  | 0.65  | 1.10 |
| 50016.00 P19 | M-019973- SH3 domai               | 6450.00   | SH3BGR    | 16.05 | 8.13  | 1.81  | 4.99 |
| 50016.00 P20 | M-019715- Src homolc              | 6461.00   | SHB       | 10.20 | 2.28  | 0.51  | 6.53 |
| 50016.00 P21 | M-019869- SH3-domai               | 9467.00   | SH3BP5    | 14.42 | 6.50  | 1.44  | 6.19 |
| 50016.00 P23 | M-018707- calcium act             | 124583.00 | CANT1     | 5.63  | 2.30  | -0.51 | 2.66 |
|              |                                   |           | mdn       | 7.92  | 3.04  |       | 4.19 |
|              |                                   |           | 3MAD      |       | 9.12  |       |      |
|              |                                   |           | MADc      |       | 4.50  |       |      |
| 50016.00 C22 |                                   |           |           | 21.35 |       | 28.02 |      |
| 50016.00 D22 |                                   |           |           | 29.29 |       | 22.70 |      |
| 50016.00 E22 |                                   |           |           | 32.84 |       | 20.47 |      |
| 50016.00 F22 |                                   |           |           | 32.89 |       | 28.12 |      |
|              |                                   |           | mn        | 29.09 |       | 24.83 |      |
|              |                                   |           | sd        | 5.43  |       | 3.85  |      |
| 50016.00 G22 |                                   |           |           | 7.97  |       | 2.38  |      |
| 50016.00 H22 |                                   |           |           | 8.91  |       | 4.92  |      |
| 50016.00 I22 |                                   |           |           | 9.67  |       | 2.40  |      |
| 50016.00 J22 |                                   |           |           | 14.06 |       | 8.95  |      |
|              |                                   |           | mn        | 10.16 |       | 4.66  |      |
|              |                                   |           | sd        | 2.70  |       | 3.10  |      |
|              |                                   |           |           | 16.30 |       | 11.55 |      |
|              |                                   |           |           | 8.09  |       | 9.29  |      |
|              |                                   |           |           | 24.39 |       | 20.85 |      |
|              |                                   |           |           | 18.94 |       | 20.17 |      |
|              |                                   |           |           | 1.29  |       | 1.03  |      |
|              |                                   |           |           | -0.29 |       | -0.03 |      |
| 50016.00 G03 | M-003290- polo-like ki            | 5347.00   | PLK1 SMAF | 24.20 |       | 17.19 |      |
| 50016.00 H03 | M-003290- polo-like ki            | 5347.00   | PLK1 SMAF | 16.11 |       | 27.64 |      |
| 50016.00 I03 | D-001206- siControl non-targeting |           |           | 14.20 |       | 6.64  |      |
| 50016.00 J03 | D-001206- siControl non-targeting |           |           | 8.55  |       | 4.15  |      |
| 50016.00 K03 | D-001600- siGLO RISC-free siRNA   |           |           | 17.68 |       | 6.44  |      |

50016.00 L03

D-001600-IsiGLO RISC-free siRNA

15.34

12.96

| abs dev | robust Z | % inf | abs dev | robust Z |               |
|---------|----------|-------|---------|----------|---------------|
| 1.40    | 0.48     | 6.10  | 2.26    | 0.81     |               |
| 3.24    | 1.11     | 3.57  | 0.27    | -0.09    |               |
| 0.81    | -0.27    | 2.57  | 1.27    | -0.46    |               |
| 7.99    | 2.73     | 9.98  | 6.14    | 2.21     | x toxic a,b,c |
| 2.16    | 0.74     | 9.64  | 5.80    | 2.08     |               |
| 0.27    | -0.09    | 2.03  | 1.81    | -0.65    |               |
| 5.12    | 1.75     | 6.52  | 2.68    | 0.97     |               |
| 0.26    | 0.09     | 3.81  | 0.03    | -0.01    |               |
| 2.41    | 0.82     | 6.69  | 2.85    | 1.02     |               |
| 2.12    | -0.72    | 7.64  | 3.80    | 1.37     |               |
| 3.07    | 1.05     | 3.22  | 0.62    | -0.22    |               |
| 0.23    | -0.08    | 2.43  | 1.41    | -0.51    |               |
| 1.40    | -0.48    | 1.65  | 2.19    | -0.79    |               |
| 1.42    | 0.48     | 3.25  | 0.59    | -0.21    |               |
| 1.55    | 0.53     | 4.98  | 1.14    | 0.41     |               |
| 1.78    | -0.60    | 1.12  | 2.72    | -0.98    |               |
| 0.65    | 0.22     | 5.36  | 1.52    | 0.55     |               |
| 2.95    | 1.01     | 6.17  | 2.33    | 0.84     |               |
| 0.32    | -0.11    | 1.75  | 2.09    | -0.75    |               |
| 0.51    | -0.17    | 22.52 | 18.68   | 6.71     |               |
| 2.44    | -0.83    | 2.26  | 1.58    | -0.57    |               |
| 1.75    | -0.60    | 1.22  | 2.62    | -0.94    |               |
| 0.05    | -0.02    | 2.00  | 1.84    | -0.66    |               |
| 0.67    | 0.23     | 0.28  | 3.56    | -1.28    |               |
| 0.88    | -0.30    | 2.83  | 1.01    | -0.36    |               |
| 1.82    | 0.62     | 0.68  | 3.16    | -1.14    |               |
| 2.02    | -0.69    | 1.58  | 2.26    | -0.81    |               |
| 0.67    | -0.23    | 3.60  | 0.24    | -0.09    |               |
| 1.72    | 0.59     | 5.79  | 1.95    | 0.70     |               |
| 2.43    | -0.83    | 1.04  | 2.80    | -1.00    |               |
| 1.83    | -0.62    | 1.11  | 2.74    | -0.98    |               |
| 1.50    | -0.51    | 0.71  | 3.13    | -1.12    |               |
| 1.24    | -0.42    | 0.77  | 3.07    | -1.10    |               |
| 0.84    | -0.28    | 3.05  | 0.79    | -0.28    |               |
| 3.11    | -1.06    | 1.94  | 1.90    | -0.68    |               |
| 0.44    | -0.15    | 1.08  | 2.76    | -0.99    |               |
| 1.17    | -0.40    | 1.57  | 2.27    | -0.81    |               |
| 2.55    | -0.87    | 2.05  | 1.79    | -0.64    |               |
| 2.37    | -0.81    | 1.30  | 2.54    | -0.91    |               |
| 2.76    | 0.94     | 1.79  | 2.05    | -0.74    |               |
| 0.44    | 0.15     | 3.67  | 0.17    | -0.06    |               |
| 0.27    | -0.09    | 8.62  | 4.78    | 1.72     |               |
| 0.29    | -0.10    | 2.69  | 1.15    | -0.41    |               |

|      |       |       |       |       |
|------|-------|-------|-------|-------|
| 0.87 | -0.30 | 1.52  | 2.32  | -0.83 |
| 0.68 | -0.23 | 0.75  | 3.09  | -1.11 |
| 3.14 | -1.07 | 1.98  | 1.86  | -0.67 |
| 0.09 | 0.03  | 7.67  | 3.83  | 1.38  |
| 0.08 | -0.03 | 5.94  | 2.10  | 0.76  |
| 2.86 | -0.97 | 2.18  | 1.66  | -0.60 |
| 0.47 | 0.16  | 8.28  | 4.44  | 1.60  |
| 1.40 | -0.48 | 3.69  | 0.15  | -0.05 |
| 2.43 | -0.83 | 3.48  | 0.36  | -0.13 |
| 0.94 | -0.32 | 3.56  | 0.28  | -0.10 |
| 2.88 | -0.98 | 4.11  | 0.27  | 0.10  |
| 0.48 | -0.16 | 14.10 | 10.26 | 3.69  |
| 3.70 | 1.26  | 5.18  | 1.34  | 0.48  |
| 3.28 | -1.12 | 5.74  | 1.90  | 0.69  |
| 2.80 | -0.95 | 6.58  | 2.74  | 0.99  |
| 1.00 | 0.34  | 8.53  | 4.69  | 1.68  |
| 2.27 | -0.77 | 2.21  | 1.63  | -0.58 |
| 2.42 | -0.83 | 1.32  | 2.52  | -0.90 |
| 2.33 | -0.79 | 4.05  | 0.21  | 0.08  |
| 1.39 | -0.47 | 3.85  | 0.01  | 0.00  |
| 0.15 | -0.05 | 8.68  | 4.84  | 1.74  |
| 0.74 | -0.25 | 7.06  | 3.22  | 1.16  |
| 3.57 | -1.22 | 1.05  | 2.79  | -1.00 |
| 0.58 | -0.20 | 2.95  | 0.89  | -0.32 |
| 2.89 | -0.99 | 1.04  | 2.80  | -1.00 |
| 0.95 | 0.32  | 3.33  | 0.51  | -0.18 |
| 2.03 | -0.69 | 2.29  | 1.55  | -0.56 |
| 2.38 | -0.81 | 3.23  | 0.61  | -0.22 |
| 1.38 | -0.47 | 7.51  | 3.67  | 1.32  |
| 0.20 | 0.07  | 11.12 | 7.28  | 2.62  |
| 0.27 | 0.09  | 3.48  | 0.36  | -0.13 |
| 2.23 | 0.76  | 8.41  | 4.57  | 1.64  |
| 2.20 | -0.75 | 2.12  | 1.72  | -0.62 |
| 2.61 | 0.89  | 4.44  | 0.60  | 0.22  |
| 3.18 | -1.08 | 3.19  | 0.65  | -0.23 |
| 1.85 | -0.63 | 4.38  | 0.54  | 0.20  |
| 2.28 | -0.78 | 2.67  | 1.17  | -0.42 |
| 3.78 | -1.29 | 3.96  | 0.12  | 0.04  |
| 0.64 | 0.22  | 3.50  | 0.34  | -0.12 |
| 3.49 | -1.19 | 0.84  | 3.00  | -1.08 |
| 2.48 | -0.84 | 2.85  | 0.99  | -0.36 |
| 2.68 | -0.91 | 3.22  | 0.62  | -0.22 |
| 3.24 | -1.10 | 0.77  | 3.07  | -1.10 |
| 1.65 | -0.56 | 1.79  | 2.05  | -0.74 |

|      |       |       |       |       |
|------|-------|-------|-------|-------|
| 2.95 | -1.00 | 0.43  | 3.41  | -1.22 |
| 3.55 | -1.21 | 2.07  | 1.77  | -0.64 |
| 0.57 | -0.19 | 1.94  | 1.90  | -0.68 |
| 1.97 | -0.67 | 1.71  | 2.13  | -0.77 |
| 0.15 | -0.05 | 5.57  | 1.73  | 0.62  |
| 2.54 | 0.87  | 18.65 | 14.81 | 5.32  |
| 2.98 | -1.01 | 0.73  | 3.11  | -1.12 |
| 0.18 | 0.06  | 4.86  | 1.02  | 0.37  |
| 1.19 | -0.40 | 3.02  | 0.82  | -0.29 |
| 0.23 | -0.08 | 5.16  | 1.32  | 0.47  |
| 1.30 | 0.44  | 7.06  | 3.22  | 1.16  |
| 0.86 | -0.29 | 0.51  | 3.33  | -1.20 |
| 2.02 | -0.69 | 0.92  | 2.92  | -1.05 |
| 2.91 | -0.99 | 3.02  | 0.82  | -0.29 |
| 2.80 | -0.95 | 1.75  | 2.09  | -0.75 |
| 0.54 | -0.18 | 5.03  | 1.19  | 0.43  |
| 3.17 | -1.08 | 2.68  | 1.16  | -0.42 |
| 2.95 | -1.00 | 1.37  | 2.47  | -0.89 |
| 2.29 | -0.78 | 2.22  | 1.62  | -0.58 |
| 2.10 | -0.71 | 0.56  | 3.28  | -1.18 |
| 1.70 | -0.58 | 1.39  | 2.45  | -0.88 |
| 0.44 | -0.15 | 2.52  | 1.32  | -0.47 |
| 3.08 | -1.05 | 0.53  | 3.31  | -1.19 |
| 0.59 | -0.20 | 1.56  | 2.28  | -0.82 |
| 2.88 | 0.98  | 3.63  | 0.21  | -0.08 |
| 3.08 | -1.05 | 0.78  | 3.06  | -1.10 |
| 4.98 | 1.70  | 6.33  | 2.49  | 0.90  |
| 0.22 | -0.07 | 1.55  | 2.29  | -0.82 |
| 2.36 | -0.80 | 2.29  | 1.55  | -0.55 |
| 1.59 | -0.54 | 2.15  | 1.69  | -0.61 |
| 1.83 | -0.62 | 2.13  | 1.71  | -0.62 |
| 0.14 | -0.05 | 3.46  | 0.38  | -0.14 |
| 1.46 | -0.50 | 1.51  | 2.33  | -0.84 |
| 4.59 | 1.57  | 2.20  | 1.64  | -0.59 |
| 0.14 | 0.05  | 1.28  | 2.56  | -0.92 |
| 0.90 | -0.30 | 1.59  | 2.25  | -0.81 |
| 2.49 | -0.85 | 4.16  | 0.32  | 0.12  |
| 1.40 | -0.48 | 1.71  | 2.13  | -0.76 |
| 2.68 | -0.91 | 6.30  | 2.46  | 0.88  |
| 3.44 | -1.17 | 2.64  | 1.20  | -0.43 |
| 2.31 | -0.79 | 2.36  | 1.48  | -0.53 |
| 0.45 | 0.15  | 4.86  | 1.02  | 0.37  |
| 4.65 | 1.59  | 1.78  | 2.06  | -0.74 |
| 1.49 | -0.51 | 2.27  | 1.57  | -0.56 |

|             |             |                     |              |               |         |
|-------------|-------------|---------------------|--------------|---------------|---------|
| 2.63        | -0.90       | 1.26                | 2.58         | -0.93         |         |
| 0.93        | -0.32       | 3.79                | 0.05         | -0.02         |         |
| 1.17        | -0.40       | 8.20                | 4.36         | 1.57          |         |
| 2.35        | -0.80       | 2.75                | 1.09         | -0.39         |         |
| 1.82        | -0.62       | 4.05                | 0.21         | 0.08          |         |
| 2.47        | -0.84       | 7.27                | 3.43         | 1.23          |         |
| 0.29        | 0.10        | 2.22                | 1.62         | -0.58         |         |
| 2.22        | -0.76       | 8.50                | 4.66         | 1.68          |         |
| 3.25        | -1.11       | 3.71                | 0.13         | -0.04         |         |
| 2.29        | 0.78        | 3.59                | 0.25         | -0.09         |         |
| 2.95        | -1.00       | 1.96                | 1.88         | -0.67         |         |
| 1.00        | -0.34       | 5.55                | 1.71         | 0.62          |         |
| 2.63        | -0.89       | 4.01                | 0.17         | 0.06          |         |
| <b>7.51</b> | <b>2.56</b> | 3.86                | 0.02         | 0.01          |         |
| 0.86        | -0.29       | 5.51                | 1.67         | 0.60          |         |
| 4.21        | 1.44        | 7.41                | 3.57         | 1.28          |         |
| 0.04        | -0.01       | 9.40                | 5.56         | 2.00          |         |
| 0.08        | -0.03       | 8.10                | 4.26         | 1.53          |         |
| <b>7.01</b> | <b>2.39</b> | 4.51                | 0.67         | 0.24          |         |
| 0.65        | 0.22        | 6.57                | 2.73         | 0.98          |         |
| 1.54        | -0.52       | 2.32                | 1.52         | -0.54         |         |
| 0.24        | -0.08       | 4.04                | 0.20         | 0.07          |         |
| 1.67        | -0.57       | 5.14                | 1.30         | 0.47          |         |
| 0.15        | 0.05        | 11.22               | <b>7.38</b>  | <b>2.65</b> x | art b,c |
| 0.78        | -0.27       | 3.27                | 0.57         | -0.20         |         |
| 1.33        | -0.45       | 6.81                | 2.97         | 1.07          |         |
| 4.67        | 1.59        | 11.21               | <b>7.37</b>  | <b>2.65</b>   |         |
| 2.80        | -0.96       | 3.07                | 0.77         | -0.28         |         |
| 2.57        | -0.87       | 3.04                | 0.80         | -0.29         |         |
| 0.61        | 0.21        | 1.05                | 2.79         | -1.00         |         |
| 1.26        | 0.43        | 12.56               | <b>8.72</b>  | <b>3.13</b> x | toxic a |
| 2.06        | 0.70        | 3.70                | 0.14         | -0.05         |         |
| 3.24        | 1.11        | 8.74                | 4.90         | 1.76          |         |
| 2.34        | 0.80        | 6.52                | 2.68         | 0.96          |         |
| 0.79        | -0.27       | 3.00                | 0.84         | -0.30         |         |
| <b>6.72</b> | <b>2.29</b> | <u><b>18.63</b></u> | <b>14.79</b> | <b>5.31</b> y |         |
| 5.11        | 1.74        | 4.16                | 0.32         | 0.12          |         |
| 0.62        | 0.21        | 8.56                | 4.72         | 1.70          |         |
| 0.45        | 0.15        | 6.60                | 2.76         | 0.99          |         |
| 1.42        | -0.48       | 0.93                | 2.91         | -1.04         |         |
| 4.14        | 1.41        | 4.62                | 0.78         | 0.28          |         |
| 1.36        | 0.46        | 1.11                | 2.73         | -0.98         |         |
| 0.52        | -0.18       | 3.83                | 0.01         | 0.00          |         |
| 0.31        | -0.11       | 3.62                | 0.22         | -0.08         |         |



|              |       |              |              |         |
|--------------|-------|--------------|--------------|---------|
| 2.24         | 0.76  | 4.05         | 0.21         | 0.07    |
| <b>9.24</b>  | 3.15  | <u>15.78</u> | <b>11.94</b> | 4.29 y  |
| 2.36         | 0.80  | 7.11         | 3.27         | 1.18    |
| 4.16         | 1.42  | 10.55        | <b>6.71</b>  | 2.41    |
| 3.44         | 1.17  | 6.13         | 2.29         | 0.82    |
| 3.19         | -1.09 | 1.21         | 2.63         | -0.94   |
| 5.93         | 2.02  | 4.96         | 1.12         | 0.40    |
| 2.32         | -0.79 | 0.27         | 3.57         | -1.28   |
| 5.56         | 1.90  | 5.25         | 1.41         | 0.51    |
| 2.76         | 0.94  | 4.37         | 0.53         | 0.19    |
| 1.33         | -0.45 | 1.44         | 2.40         | -0.86   |
| 1.39         | -0.47 | 0.31         | 3.53         | -1.27   |
| 2.39         | 0.82  | 5.57         | 1.73         | 0.62    |
| 0.46         | -0.15 | 5.59         | 1.75         | 0.63    |
| <b>12.36</b> | 4.22  | 3.20         | 0.64         | -0.23   |
| 3.59         | 1.23  | 4.41         | 0.57         | 0.21    |
| 1.51         | -0.51 | 2.97         | 0.87         | -0.31   |
| 4.49         | 1.53  | 5.29         | 1.45         | 0.52    |
| 2.32         | -0.79 | 3.20         | 0.64         | -0.23   |
| 1.79         | 0.61  | 2.27         | 1.57         | -0.56   |
| 4.02         | 1.37  | 1.42         | 2.42         | -0.87   |
| <b>6.72</b>  | 2.29  | 3.31         | 0.53         | -0.19   |
| 0.37         | -0.12 | 1.72         | 2.12         | -0.76   |
| <b>7.47</b>  | 2.55  | 3.65         | 0.19         | -0.07 y |
| 1.91         | 0.65  | 2.61         | 1.23         | -0.44   |
| 0.19         | 0.06  | 5.73         | 1.89         | 0.68    |
| 0.42         | -0.14 | 4.34         | 0.50         | 0.18    |
| 3.33         | 1.14  | 5.74         | 1.90         | 0.68    |
| 0.59         | 0.20  | 7.46         | 3.62         | 1.30    |
| 0.99         | -0.34 | 2.58         | 1.26         | -0.45   |
| 3.24         | 1.11  | 1.96         | 1.88         | -0.67   |
| <b>9.38</b>  | 3.20  | <u>13.10</u> | <b>9.26</b>  | 3.33 y  |
| 4.06         | 1.38  | 4.78         | 0.94         | 0.34    |
| <b>11.06</b> | 3.77  | <u>14.65</u> | <b>10.81</b> | 3.89 y  |
| <b>48.82</b> | 16.65 | 5.53         | 1.69         | 0.61    |
| 5.40         | 1.84  | 5.40         | 1.56         | 0.56    |
| <b>11.48</b> | 3.92  | <u>12.30</u> | <b>8.46</b>  | 3.04 y  |
| 0.45         | -0.15 | 4.47         | 0.63         | 0.23    |
| 1.85         | 0.63  | 3.09         | 0.75         | -0.27   |
| <b>6.90</b>  | 2.35  | <u>12.55</u> | <b>8.71</b>  | 3.13 y  |
| <b>11.57</b> | 3.95  | <u>26.44</u> | <b>22.60</b> | 8.12 y  |
| 5.28         | 1.80  | 6.68         | 2.84         | 1.02    |
| 5.03         | 1.72  | 4.74         | 0.90         | 0.32    |
| 4.30         | 1.47  | 6.93         | 3.09         | 1.11    |

|              |             |              |              |               |
|--------------|-------------|--------------|--------------|---------------|
| 0.35         | -0.12       | 5.06         | 1.22         | 0.44          |
| 0.91         | 0.31        | 3.90         | 0.06         | 0.02          |
| 0.61         | -0.21       | 5.34         | 1.50         | 0.54          |
| 0.74         | -0.25       | 2.94         | 0.90         | -0.32         |
| 1.47         | 0.50        | 3.24         | 0.60         | -0.22         |
| 1.46         | -0.50       | 1.56         | 2.28         | -0.82         |
| <b>5.99</b>  | <b>2.04</b> | 4.43         | 0.59         | 0.21          |
| 2.13         | 0.73        | 3.64         | 0.20         | -0.07         |
| 5.32         | 1.82        | 4.10         | 0.26         | 0.10          |
| 3.10         | 1.06        | 3.02         | 0.82         | -0.29         |
| <b>8.01</b>  | <b>2.73</b> | 0.37         | 3.47         | -1.24         |
| 0.17         | 0.06        | 2.11         | 1.73         | -0.62         |
| <b>7.01</b>  | <b>2.39</b> | 5.59         | 1.75         | 0.63          |
| 1.60         | 0.55        | 2.93         | 0.91         | -0.33         |
| 3.96         | 1.35        | 0.92         | 2.92         | -1.05         |
| <b>6.01</b>  | <b>2.05</b> | 3.06         | 0.78         | -0.28         |
| <b>12.41</b> | <b>4.23</b> | 6.65         | 2.81         | 1.01          |
| <b>6.87</b>  | <b>2.35</b> | 7.50         | 3.66         | 1.32          |
| 4.96         | 1.69        | 6.82         | 2.98         | 1.07          |
| <b>9.47</b>  | <b>3.23</b> | 8.24         | 4.40         | 1.58          |
| 0.62         | -0.21       | 2.99         | 0.85         | -0.30         |
| 4.49         | 1.53        | 2.68         | 1.16         | -0.42         |
| 1.23         | -0.42       | 4.32         | 0.48         | 0.17          |
| 1.47         | 0.50        | 8.99         | 5.15         | 1.85          |
| 2.41         | 0.82        | 5.49         | 1.65         | 0.59          |
| 1.99         | 0.68        | 9.00         | 5.16         | 1.86          |
| 4.04         | 1.38        | 12.00        | <b>8.16</b>  | <b>2.93</b>   |
| 0.37         | 0.13        | 4.85         | 1.01         | 0.36          |
| 0.54         | 0.18        | 5.28         | 1.44         | 0.52          |
| <b>6.24</b>  | <b>2.13</b> | 8.78         | 4.94         | 1.77          |
| 1.43         | 0.49        | 6.21         | 2.37         | 0.85          |
| <b>9.68</b>  | <b>3.30</b> | <u>13.79</u> | <b>9.95</b>  | <b>3.57</b> y |
| 0.43         | 0.15        | 6.12         | 2.28         | 0.82          |
| <b>6.97</b>  | <b>2.38</b> | <u>9.89</u>  | <b>6.05</b>  | <b>2.17</b> y |
| 2.72         | 0.93        | 10.92        | <b>7.08</b>  | 2.54          |
| <b>15.13</b> | <b>5.16</b> | <u>23.33</u> | <b>19.49</b> | <b>7.00</b> y |
| 0.49         | 0.17        | 5.62         | 1.78         | 0.64          |
| 0.56         | 0.19        | 7.45         | 3.61         | 1.30          |
| 0.97         | 0.33        | 5.22         | 1.38         | 0.50          |
| 1.88         | 0.64        | 8.48         | 4.64         | 1.67          |
| 1.13         | 0.39        | 4.30         | 0.46         | 0.16          |
| 0.11         | 0.04        | 1.67         | 2.17         | -0.78         |
| 1.35         | -0.46       | 3.10         | 0.74         | -0.26         |
| 1.34         | 0.46        | 4.05         | 0.21         | 0.08          |

|       |       |       |       |       |               |
|-------|-------|-------|-------|-------|---------------|
| 1.21  | -0.41 | 3.72  | 0.12  | -0.04 |               |
| 3.67  | -1.25 | 1.68  | 2.16  | -0.78 |               |
| 1.44  | 0.49  | 8.84  | 5.00  | 1.80  |               |
| 0.92  | 0.32  | 6.64  | 2.80  | 1.01  |               |
| 0.62  | 0.21  | 7.11  | 3.27  | 1.18  |               |
| 0.81  | -0.28 | 3.04  | 0.80  | -0.29 |               |
| 8.42  | 2.87  | 3.34  | 0.50  | -0.18 |               |
| 1.95  | -0.66 | 2.42  | 1.42  | -0.51 |               |
| 1.36  | -0.46 | 2.93  | 0.91  | -0.33 |               |
| 14.96 | 5.10  | 4.75  | 0.91  | 0.33  | x toxic a,b,c |
| 1.35  | 0.46  | 8.91  | 5.07  | 1.82  |               |
| 2.27  | 0.78  | 9.16  | 5.32  | 1.91  |               |
| 2.22  | 0.76  | 9.85  | 6.01  | 2.16  |               |
| 1.79  | 0.61  | 9.17  | 5.33  | 1.92  |               |
| 0.45  | -0.15 | 9.74  | 5.90  | 2.12  |               |
| 1.49  | 0.51  | 7.50  | 3.66  | 1.31  |               |
| 1.93  | -0.66 | 4.54  | 0.70  | 0.25  |               |
| 1.47  | 0.50  | 8.36  | 4.52  | 1.62  |               |
| 2.89  | 0.99  | 9.53  | 5.69  | 2.05  |               |
| 1.05  | 0.36  | 8.75  | 4.91  | 1.77  |               |
| 1.11  | -0.38 | 5.78  | 1.94  | 0.70  |               |
| 5.07  | 1.73  | 7.07  | 3.23  | 1.16  |               |
| 6.00  | 2.05  | 8.85  | 5.01  | 1.80  |               |
| 5.60  | 1.91  | 10.84 | 7.00  | 2.51  |               |
| 1.49  | -0.51 | 4.35  | 0.51  | 0.18  |               |
| 1.13  | 0.39  | 7.08  | 3.24  | 1.17  |               |
| 13.00 | 4.43  | 4.57  | 0.73  | 0.26  | x toxic a,b,c |
| 11.63 | 3.97  | 5.72  | 1.88  | 0.68  |               |
| 3.75  | 1.28  | 2.80  | 1.04  | -0.37 |               |
| 8.04  | 2.74  | 12.80 | 8.96  | 3.22  | y             |
| 2.81  | -0.96 | 2.84  | 1.00  | -0.36 |               |
| 5.63  | 1.92  | 2.43  | 1.41  | -0.50 |               |
| 0.69  | 0.24  | 3.09  | 0.75  | -0.27 |               |
| 11.56 | 3.94  | 21.48 | 17.64 | 6.34  | y             |
| 3.69  | 1.26  | 3.16  | 0.68  | -0.24 |               |
| 0.85  | -0.29 | 4.36  | 0.52  | 0.19  |               |
| 0.20  | -0.07 | 4.95  | 1.11  | 0.40  |               |
| 8.28  | 2.83  | 1.31  | 2.53  | -0.91 |               |
| 0.74  | 0.25  | 0.83  | 3.01  | -1.08 |               |
| 0.03  | 0.01  | 1.40  | 2.44  | -0.88 |               |
| 2.76  | 0.94  | 4.40  | 0.56  | 0.20  |               |
| 1.49  | -0.51 | 5.26  | 1.42  | 0.51  |               |
| 3.75  | 1.28  | 5.79  | 1.95  | 0.70  |               |
| 0.11  | 0.04  | 2.64  | 1.20  | -0.43 |               |

|      |       |      |      |       |
|------|-------|------|------|-------|
| 2.77 | -0.94 | 0.80 | 3.04 | -1.09 |
| 2.38 | -0.81 | 1.57 | 2.27 | -0.81 |
| 2.08 | -0.71 | 4.60 | 0.76 | 0.27  |
| 0.57 | 0.20  | 6.10 | 2.26 | 0.81  |
| 2.85 | -0.97 | 2.83 | 1.01 | -0.36 |
| 1.39 | -0.47 | 7.61 | 3.77 | 1.36  |
| 1.23 | -0.42 | 3.42 | 0.42 | -0.15 |
| 0.91 | -0.31 | 9.12 | 5.28 | 1.90  |
| 3.09 | -1.05 | 2.52 | 1.32 | -0.47 |
| 0.80 | 0.27  | 3.00 | 0.84 | -0.30 |
| 2.34 | 0.80  | 3.65 | 0.19 | -0.07 |
| 2.00 | 0.68  | 8.17 | 4.33 | 1.56  |
| 1.53 | -0.52 | 4.46 | 0.62 | 0.23  |
| 1.98 |       | 3.84 | 1.88 |       |
| 5.94 |       |      | 5.64 |       |
| 2.93 |       |      | 2.78 |       |

21.55

21.78

21.22

21.67

21.55

0.24

3.32

5.11

5.57

2.01

4.01

1.64

0.72

4.56

5.28

17.55

0.30

0.70

2.79

11.74

5.63

2.32

9.61



|              |                                            |                        | <u>% inf</u> | <u>abs dev</u> |
|--------------|--------------------------------------------|------------------------|--------------|----------------|
| 50017.00 A02 | M-007953- interleukin 1, beta              | 3553.00 IL1B           | 0.16         | 3.67           |
| 50017.00 A04 | M-007952- interleukin 1, alpha             | 3552.00 IL1A           | 3.66         | 0.17           |
| 50017.00 A05 | M-004381- B-cell CLL/lymphoma 10           | 8915.00 BCL10          | 2.58         | 1.25           |
| 50017.00 A06 | M-007951- interleukin 19                   | 29949.00 IL19          | 3.09         | 0.74           |
| 50017.00 A07 | M-017626- brain-derived neurotrophic f     | 627.00 BDNF            | 0.68         | 3.15           |
| 50017.00 A08 | M-007949- interleukin 18 receptor 1        | 8809.00 IL18R1         | 2.07         | 1.76           |
| 50017.00 A09 | M-012018- bone morphogenetic proteir       | 9210.00 BMP15          | 1.10         | 2.73           |
| 50017.00 A10 | M-017446- interleukin 18 binding protei    | 10068.00 IL18BP        | 1.29         | 2.54           |
| 50017.00 A11 | M-011219- bone morphogenetic proteir       | 650.00 BMP2            | 1.86         | 1.97           |
| 50017.00 A12 | M-007948- interleukin 18 (interferon-ga    | 3606.00 IL18           | 2.41         | 1.42           |
| 50017.00 A13 | M-011220- bone morphogenetic proteir       | 651.00 BMP3            | 3.12         | 0.71           |
| 50017.00 A14 | <b>M-007944- interleukin 17 receptor B</b> | <b>55540.00 IL17RB</b> | <b>10.64</b> | <b>6.81</b>    |
| 50017.00 A15 | M-011221- bone morphogenetic proteir       | 652.00 BMP4            | 1.94         | 1.89           |
| 50017.00 A16 | M-007943- interleukin 17 receptor A        | 23765.00 IL17RA        | 5.06         | 1.23           |
| 50017.00 A17 | M-017549- bone morphogenetic proteir       | 653.00 BMP5            | 2.36         | 1.47           |
| 50017.00 A18 | M-007939- interleukin 17C                  | 27189.00 IL17C         | 5.14         | 1.31           |
| 50017.00 A19 | M-021475- bone morphogenetic proteir       | 654.00 BMP6            | 1.90         | 1.93           |
| 50017.00 A20 | M-007938- interleukin 17B                  | 27190.00 IL17B         | 5.89         | 2.06           |
| 50017.00 A21 | M-011592- bone morphogenetic proteir       | 655.00 BMP7            | 4.45         | 0.62           |
| 50017.00 A23 | M-011593- bone morphogenetic proteir       | 656.00 BMP8B           | 8.90         | 5.07           |
| 50017.00 B02 | M-011173- folate receptor 2 (fetal)        | 2350.00 FOLR2          | 0.28         | 3.55           |
| 50017.00 B04 | M-010403- folate receptor 1 (adult)        | 2348.00 FOLR1          | 0.66         | 3.17           |
| 50017.00 B05 | M-007955- interleukin 1 family, membe      | 26525.00 IL1F5         | 1.68         | 2.15           |
| 50017.00 B06 | M-020176- fms-related tyrosine kinase 3    | 2323.00 FLT3LG         | 3.19         | 0.64           |
| 50017.00 B07 | M-007956- interleukin 1 family, membe      | 27179.00 IL1F6         | 0.79         | 3.04           |
| 50017.00 B08 | M-012579- filamin A, alpha (actin bindin   | 2316.00 FLNA           | 2.57         | 1.26           |
| 50017.00 B09 | M-007957- interleukin 1 family, membe      | 27178.00 IL1F7         | 3.54         | 0.29           |
| 50017.00 B10 | M-017552- c-fos induced growth factor 1    | 2277.00 FIGF           | 3.48         | 0.35           |
| 50017.00 B11 | M-007958- interleukin 1 family, membe      | 27177.00 IL1F8         | 3.98         | 0.15           |
| 50017.00 B12 | M-011660- fibroblast growth factor 9 (gl   | 2254.00 FGF9           | 3.49         | 0.34           |
| 50017.00 B13 | M-007959- interleukin 1 family, membe      | 56300.00 IL1F9         | 1.89         | 1.94           |
| 50017.00 B14 | M-013693- fibroblast growth factor 8 (a    | 2253.00 FGF8           | 3.88         | 0.05           |
| 50017.00 B15 | M-005188- interleukin 1 receptor, type I   | 3554.00 IL1R1          | 3.74         | 0.09           |
| 50017.00 B16 | M-011659- fibroblast growth factor 7 (k    | 2252.00 FGF7           | 2.08         | 1.75           |
| 50017.00 B17 | M-007960- interleukin 1 receptor, type I   | 7850.00 IL1R2          | 0.98         | 2.85           |
| 50017.00 B18 | M-003891- fibroblast growth factor 6       | 2251.00 FGF6           | 1.50         | 2.33           |
| 50017.00 B19 | M-003504- interleukin 1 receptor access    | 3556.00 IL1RAP         | 6.13         | 2.30           |
| 50017.00 B20 | M-011972- fibroblast growth factor 5       | 2250.00 FGF5           | 3.52         | 0.31           |
| 50017.00 B21 | M-007962- interleukin 1 receptor access    | 26280.00 IL1RAPL2      | 8.26         | 4.43           |
| 50017.00 B23 | M-007963- interleukin 1 receptor-like 1    | 9173.00 IL1RL1         | 3.20         | 0.63           |
| 50017.00 C02 | M-007937- interleukin 17A                  | 3605.00 IL17A          | 1.06         | 2.77           |
| 50017.00 C04 | M-007936- interleukin 16 (lymphocyte c     | 3603.00 IL16           | 4.11         | 0.28           |
| 50017.00 C05 | M-019846- benzodiazapine receptor (pe      | 9256.00 BZRAP1         | 4.06         | 0.23           |

|              |                                                |                       |              |             |
|--------------|------------------------------------------------|-----------------------|--------------|-------------|
| 50017.00 C06 | M-007935- interleukin 15 receptor, alph        | 3601.00 IL15RA        | 3.64         | 0.19        |
| 50017.00 C07 | M-009559- translocator protein (18kDa)         | 706.00 TSPO           | 0.78         | 3.05        |
| 50017.00 C08 | M-007934- interleukin 15                       | 3600.00 IL15          | 6.25         | 2.42        |
| 50017.00 C09 | M-021221- cytokine-like 1                      | 54360.00 CYTL1        | 1.79         | 2.04        |
| 50017.00 C10 | M-004598- interleukin 13 receptor, alph        | 3598.00 IL13RA2       | 2.02         | 1.81        |
| 50017.00 C11 | M-007815- CD93 molecule                        | 22918.00 CD93         | 2.90         | 0.93        |
| 50017.00 C12 | M-007932- interleukin 12 receptor, beta        | 3595.00 IL12RB2       | 2.57         | 1.26        |
| 50017.00 C13 | M-011163- cholecystokinin                      | 885.00 CCK            | 3.01         | 0.82        |
| 50017.00 C14 | M-007931- interleukin 12 receptor, beta        | 3594.00 IL12RB1       | 2.81         | 1.02        |
| 50017.00 C15 | M-007822- chemokine (C-C motif) liganc         | 6346.00 CCL1          | 2.13         | 1.70        |
| 50017.00 C16 | M-007930- interleukin 12B (natural kille       | 3593.00 IL12B         | 4.25         | 0.42        |
| 50017.00 C17 | M-007823- chemokine (C-C motif) liganc         | 6356.00 CCL11         | 5.54         | 1.71        |
| 50017.00 C18 | M-007927- interleukin 11                       | 3589.00 IL11          | 1.70         | 2.13        |
| 50017.00 C19 | M-007824- chemokine (C-C motif) liganc         | 6357.00 CCL13         | 4.01         | 0.18        |
| 50017.00 C20 | <b>M-007926- interleukin 10 receptor, beta</b> | <b>3588.00 IL10RB</b> | <b>12.22</b> | <b>8.39</b> |
| 50017.00 C21 | M-007825- chemokine (C-C motif) liganc         | 6358.00 CCL14         | 2.06         | 1.77        |
| 50017.00 C23 | M-007826- chemokine (C-C motif) liganc         | 6359.00 CCL15         | 6.83         | 3.00        |
| 50017.00 D02 | M-003890- fibroblast growth factor 4 (h        | 2249.00 FGF4          | 1.20         | 2.63        |
| 50017.00 D04 | M-003889- fibroblast growth factor 3 (nr       | 2248.00 FGF3          | 7.80         | 3.97        |
| 50017.00 D05 | M-007965- interleukin 1 receptor-like 2        | 8808.00 IL1RL2        | 5.00         | 1.17        |
| 50017.00 D06 | M-013172- fibroblast growth factor 23          | 8074.00 FGF23         | 5.11         | 1.28        |
| 50017.00 D07 | M-007966- interleukin 1 receptor antag         | 3557.00 IL1RN         | 2.29         | 1.54        |
| 50017.00 D08 | M-013305- fibroblast growth factor 21          | 26291.00 FGF21        | 2.97         | 0.86        |
| 50017.00 D09 | M-007971- interleukin 21 receptor              | 50615.00 IL21R        | 2.14         | 1.69        |
| 50017.00 D10 | M-013235- fibroblast growth factor 20          | 26281.00 FGF20        | 5.46         | 1.63        |
| 50017.00 D11 | M-007972- interleukin 22                       | 50616.00 IL22         | 5.90         | 2.07        |
| 50017.00 D12 | M-013670- fibroblast growth factor 19          | 9965.00 FGF19         | 3.44         | 0.39        |
| 50017.00 D13 | M-007973- interleukin 22 receptor, alph        | 58985.00 IL22RA1      | 2.42         | 1.41        |
| 50017.00 D14 | M-011537- fibroblast growth factor 18          | 8817.00 FGF18         | 7.39         | 3.56        |
| 50017.00 D15 | M-007977- interleukin 24                       | 11009.00 IL24         | 4.83         | 1.00        |
| 50017.00 D16 | M-011540- fibroblast growth factor 17          | 8822.00 FGF17         | 7.06         | 3.23        |
| 50017.00 D17 | M-007978- interleukin 26                       | 55801.00 IL26         | 5.94         | 2.11        |
| 50017.00 D18 | M-011541- fibroblast growth factor 16          | 8823.00 FGF16         | 9.05         | 5.22        |
| 50017.00 D19 | M-007983- interleukin 2 receptor, alpha        | 3559.00 IL2RA         | 3.43         | 0.40        |
| 50017.00 D20 | M-011860- fibroblast growth factor 14          | 2259.00 FGF14         | 11.37        | 7.54        |
| 50017.00 D21 | M-007984- interleukin 2 receptor, beta         | 3560.00 IL2RB         | 12.01        | 8.18        |
| 50017.00 D23 | M-007985- interleukin 2 receptor, gamn         | 3561.00 IL2RG         | 4.38         | 0.55        |
| 50017.00 E02 | M-007925- interleukin 10 receptor, alph        | 3587.00 IL10RA        | 2.66         | 1.17        |
| 50017.00 E04 | M-005066- interleukin 10                       | 3586.00 IL10          | 2.64         | 1.19        |
| 50017.00 E05 | M-007827- chemokine (C-C motif) liganc         | 6360.00 CCL16         | 4.11         | 0.28        |
| 50017.00 E06 | M-003767- inhibitor of kappa light polyp       | 8517.00 IKBKKG        | 1.81         | 2.02        |
| 50017.00 E07 | M-007829- chemokine (C-C motif) liganc         | 6362.00 CCL18         | 4.07         | 0.24        |
| 50017.00 E08 | M-012190- IK cytokine, down-regulator          | 3550.00 IK            | 8.53         | 4.70        |
| 50017.00 E09 | M-007830- chemokine (C-C motif) liganc         | 6363.00 CCL19         | 4.72         | 0.89        |

|              |                                           |                |       |       |
|--------------|-------------------------------------------|----------------|-------|-------|
| 50017.00 E10 | M-004093- insulin-like growth factor 2 (: | 3481.00 IGF2   | 2.44  | 1.39  |
| 50017.00 E11 | M-007832- chemokine (C-C motif) liganc    | 6364.00 CCL20  | 3.37  | 0.46  |
| 50017.00 E12 | M-003011- insulin-like growth factor 1 (: | 3479.00 IGF1   | 9.97  | 6.14  |
| 50017.00 E13 | M-007833- chemokine (C-C motif) liganc    | 6366.00 CCL21  | 3.97  | 0.14  |
| 50017.00 E14 | M-012638- interferon, omega 1             | 3467.00 IFNW1  | 3.51  | 0.32  |
| 50017.00 E15 | M-007834- chemokine (C-C motif) liganc    | 6367.00 CCL22  | 8.88  | 5.05  |
| 50017.00 E16 | M-011057- interferon gamma receptor :     | 3459.00 IFNGR1 | 14.36 | 10.53 |
| 50017.00 E17 | M-007836- chemokine (C-C motif) liganc    | 6369.00 CCL24  | 12.80 | 8.97  |
| 50017.00 E18 | M-019379- interferon, gamma               | 3458.00 IFNG   | 5.62  | 1.79  |
| 50017.00 E19 | M-007838- chemokine (C-C motif) liganc    | 10344.00 CCL26 | 10.57 | 6.74  |
| 50017.00 E20 | M-019656- interferon, beta 1, fibroblast  | 3456.00 IFNB1  | 4.11  | 0.28  |
| 50017.00 E21 | M-007839- chemokine (C-C motif) liganc    | 10850.00 CCL27 | 9.39  | 5.56  |
| 50017.00 E23 | M-007840- chemokine (C-C motif) liganc    | 56477.00 CCL28 | 7.25  | 3.42  |
| 50017.00 F02 | M-011859- fibroblast growth factor 13     | 2258.00 FGF13  | 4.06  | 0.23  |
| 50017.00 F04 | M-011858- fibroblast growth factor 11     | 2256.00 FGF11  | 2.06  | 1.77  |
| 50017.00 F05 | M-007986- interleukin 3 (colony-stimula   | 3562.00 IL3    | 5.22  | 1.39  |
| 50017.00 F06 | M-011857- fibroblast growth factor 10     | 2255.00 FGF10  | 3.21  | 0.62  |
| 50017.00 F07 | M-007988- interleukin 3 receptor, alpha   | 3563.00 IL3RA  | 1.98  | 1.85  |
| 50017.00 F08 | M-011172- fibroblast growth factor 1 (a   | 2246.00 FGF1   | 3.10  | 0.73  |
| 50017.00 F09 | M-007989- interleukin 4                   | 3565.00 IL4    | 1.96  | 1.87  |
| 50017.00 F10 | M-015838- fem-1 homolog b (C. elegans     | 10116.00 FEM1B | 3.26  | 0.57  |
| 50017.00 F11 | M-007990- interleukin 4 receptor          | 3566.00 IL4R   | 2.29  | 1.54  |
| 50017.00 F12 | M-017906- Fc fragment of IgG, receptor,   | 2217.00 FCGRT  | 5.37  | 1.54  |
| 50017.00 F13 | M-007991- interleukin 5 (colony-stimula   | 3567.00 IL5    | 3.55  | 0.28  |
| 50017.00 F14 | M-019374- Fc fragment of IgG, low affin   | 2215.00 FCGR3B | 4.46  | 0.63  |
| 50017.00 F15 | M-007992- interleukin 5 receptor, alpha   | 3568.00 IL5RA  | 2.51  | 1.32  |
| 50017.00 F16 | M-015823- Fc fragment of IgG, low affin   | 2213.00 FCGR2B | 5.49  | 1.66  |
| 50017.00 F17 | M-007993- interleukin 6 (interferon, bet  | 3569.00 IL6    | 8.34  | 4.51  |
| 50017.00 F18 | M-014152- Fc fragment of IgG, low affin   | 2212.00 FCGR2A | 14.84 | 11.01 |
| 50017.00 F19 | M-007994- interleukin 6 receptor          | 3570.00 IL6R   | 11.86 | 8.03  |
| 50017.00 F20 | M-015650- Fc fragment of IgG, high affir  | 2209.00 FCGR1A | 16.86 | 13.03 |
| 50017.00 F21 | M-005166- interleukin 6 signal transduc   | 3572.00 IL6ST  | 7.47  | 3.64  |
| 50017.00 F23 | M-007995- interleukin 7                   | 3574.00 IL7    | 7.33  | 3.50  |
| 50017.00 G02 | M-015411- interferon (alpha, beta and c   | 3455.00 IFNAR2 | 8.13  | 4.30  |
| 50017.00 G04 | M-020209- interferon (alpha, beta and c   | 3454.00 IFNAR1 | 25.41 | 21.58 |
| 50017.00 G05 | M-007842- chemokine (C-C motif) liganc    | 6349.00 CCL3L1 | 2.68  | 1.15  |
| 50017.00 G06 | M-019655- interferon, alpha 8             | 3445.00 IFNA8  | 3.59  | 0.24  |
| 50017.00 G07 | M-007844- chemokine (C-C motif) liganc    | 6352.00 CCL5   | 2.77  | 1.06  |
| 50017.00 G08 | M-014155- interferon, alpha 6             | 3443.00 IFNA6  | 0.99  | 2.84  |
| 50017.00 G09 | M-007845- chemokine (C-C motif) liganc    | 6354.00 CCL7   | 1.90  | 1.93  |
| 50017.00 G10 | M-012637- interferon, alpha 5             | 3442.00 IFNA5  | 5.64  | 1.81  |
| 50017.00 G11 | M-007846- chemokine (C-C motif) liganc    | 6355.00 CCL8   | 0.89  | 2.94  |
| 50017.00 G12 | M-014154- interferon, alpha 4             | 3441.00 IFNA4  | 6.47  | 2.64  |
| 50017.00 G13 | M-011121- CD14 molecule                   | 929.00 CD14    | 3.18  | 0.65  |



|              |                                                    |                       |              |              |
|--------------|----------------------------------------------------|-----------------------|--------------|--------------|
| 50017.00 G14 | M-019654- interferon, alpha 21                     | 3452.00 IFNA21        | 4.64         | 0.81         |
| 50017.00 G15 | M-019429- CD1d molecule                            | 912.00 CD1D           | 4.12         | 0.29         |
| 50017.00 G16 | M-013809- interferon, alpha 2                      | 3440.00 IFNA2         | 6.46         | 2.63         |
| 50017.00 G17 | M-017854- CD2 molecule                             | 914.00 CD2            | 5.81         | 1.98         |
| 50017.00 G18 | M-014147- interferon, alpha 17                     | 3451.00 IFNA17        | 3.26         | 0.57         |
| 50017.00 G19 | M-016287- C-type lectin domain family 4            | 10332.00 CLEC4M       | 4.56         | 0.73         |
| 50017.00 G20 | M-019653- interferon, alpha 16                     | 3449.00 IFNA16        | 6.45         | 2.62         |
| 50017.00 G21 | M-012734- CD28 molecule                            | 940.00 CD28           | 4.26         | 0.43         |
| 50017.00 G23 | M-019502- CD33 molecule                            | 945.00 CD33           | 5.24         | 1.41         |
| 50017.00 H02 | M-016242- Fc fragment of IgE, low affinity         | 2208.00 FCER2         | 3.52         | 0.31         |
| 50017.00 H04 | <b>M-011856- Fc fragment of IgE, high affinity</b> | <b>2207.00 FCER1G</b> | <b>14.03</b> | <b>10.20</b> |
| 50017.00 H05 | M-007996- interleukin 7 receptor                   | 3575.00 IL7R          | 3.68         | 0.15         |
| 50017.00 H06 | M-011658- Fc fragment of IgE, high affinity        | 2205.00 FCER1A        | 4.68         | 0.85         |
| 50017.00 H07 | M-007997- interleukin 9                            | 3578.00 IL9           | 4.00         | 0.17         |
| 50017.00 H08 | M-011657- Fc fragment of IgA, receptor             | 2204.00 FCAR          | 1.35         | 2.48         |
| 50017.00 H09 | M-007998- interleukin 9 receptor                   | 3581.00 IL9R          | 0.76         | 3.07         |
| 50017.00 H10 | M-003800- Fas (TNFRSF6)-associated via             | 8772.00 FADD          | 3.90         | 0.07         |
| 50017.00 H11 | M-011700- inhibin, alpha                           | 3623.00 INHA          | 1.67         | 2.16         |
| 50017.00 H12 | M-012338- endothelial cell-specific molecule       | 11082.00 ESM1         | 2.11         | 1.72         |
| 50017.00 H13 | M-011701- inhibin, beta A (activin A, activin      | 3624.00 INHBA         | 1.34         | 2.49         |
| 50017.00 H14 | M-011268- epiregulin                               | 2069.00 EREG          | 2.30         | 1.53         |
| 50017.00 H15 | M-011702- inhibin, beta B (activin AB, activin     | 3625.00 INHBB         | 0.93         | 2.90         |
| 50017.00 H16 | M-004006- epidermal growth factor receptor         | 58513.00 EPS15L1      | 2.08         | 1.75         |
| 50017.00 H17 | M-012113- inhibin, beta C                          | 3626.00 INHBC         | 4.36         | 0.53         |
| 50017.00 H18 | <b>M-020204- erythropoietin</b>                    | <b>2056.00 EPO</b>    | <b>7.85</b>  | 4.02         |
| 50017.00 H19 | M-011058- insulin                                  | 3630.00 INS           | 2.10         | 1.73         |
| 50017.00 H20 | M-012994- EGF-like-domain, multiple 6              | 25975.00 EGFL6        | 2.61         | 1.22         |
| 50017.00 H21 | M-020006- insulin-like 3 (Leydig cell)             | 3640.00 INSL3         | 1.80         | 2.03         |
| 50017.00 H23 | M-011703- insulin-like 4 (placenta)                | 3641.00 INSL4         | 3.56         | 0.27         |
| 50017.00 I02 | M-019652- interferon, alpha 14                     | 3448.00 IFNA14        | 1.77         | 2.06         |
| 50017.00 I04 | M-014265- interferon, alpha 13                     | 3447.00 IFNA13        | 2.43         | 1.40         |
| 50017.00 I05 | M-010206- CD36 molecule (thrombospondin            | 948.00 CD36           | 6.12         | 2.29         |
| 50017.00 I06 | M-019651- interferon, alpha 10                     | 3446.00 IFNA10        | 0.94         | 2.89         |
| 50017.00 I07 | M-020205- CD3d molecule, delta (CD3-T)             | 915.00 CD3D           | 4.58         | 0.75         |
| 50017.00 I08 | <b>M-011698- intercellular adhesion molecule</b>   | <b>3385.00 ICAM3</b>  | <b>8.41</b>  | <b>4.58</b>  |
| 50017.00 I09 | M-011005- CD3g molecule, gamma (CD3-epsilon        | 917.00 CD3G           | 2.52         | 1.31         |
| 50017.00 I10 | M-011182- intercellular adhesion molecule          | 3384.00 ICAM2         | 5.00         | 1.17         |
| 50017.00 I11 | M-004257- CD247 molecule                           | 919.00 CD247          | 1.74         | 2.09         |
| 50017.00 I12 | M-003502- intercellular adhesion molecule          | 3383.00 ICAM1         | 1.87         | 1.96         |
| 50017.00 I13 | M-009999- CD44 molecule (Indian blood group        | 960.00 CD44           | 3.86         | 0.03         |
| 50017.00 I14 | M-007790- islet amyloid polypeptide                | 3375.00 IAPP          | 3.13         | 0.70         |
| 50017.00 I15 | M-007848- CD5 molecule                             | 921.00 CD5            | 2.63         | 1.20         |
| 50017.00 I16 | M-011932- high mobility group nucleoside           | 9324.00 HMGN3         | 1.29         | 2.54         |
| 50017.00 I17 | M-007850- CD6 molecule                             | 923.00 CD6            | 2.00         | 1.83         |

|              |                                          |                  |              |       |
|--------------|------------------------------------------|------------------|--------------|-------|
| 50017.00 I18 | M-012105- major histocompatibility con   | 3108.00 HLA-DMA  | 3.00         | 0.83  |
| 50017.00 I19 | M-006359- CD69 molecule                  | 969.00 CD69      | 1.57         | 2.26  |
| 50017.00 I20 | M-019782- hepatoma-derived growth fa     | 3068.00 HDGF     | 5.14         | 1.31  |
| 50017.00 I21 | M-019508- CD72 molecule                  | 971.00 CD72      | 5.85         | 2.02  |
| 50017.00 I23 | M-017568- CD8a molecule                  | 925.00 CD8A      | 1.35         | 2.48  |
| 50017.00 J02 | M-011650- epidermal growth factor (be    | 1950.00 EGF      | 2.32         | 1.51  |
| 50017.00 J04 | M-003659- ephrin-B2                      | 1948.00 EFNB2    | 1.99         | 1.84  |
| 50017.00 J05 | M-019960- insulin-like 5                 | 10022.00 INSL5   | 5.33         | 1.50  |
| 50017.00 J06 | M-003658- ephrin-B1                      | 1947.00 EFNB1    | 2.84         | 0.99  |
| 50017.00 J07 | M-019675- insulin-like 6                 | 11172.00 INSL6   | 3.74         | 0.09  |
| 50017.00 J08 | M-011649- ephrin-A5                      | 1946.00 EFNA5    | 1.15         | 2.68  |
| 50017.00 J09 | M-003554- insulin receptor substrate 2   | 8660.00 IRS2     | 3.86         | 0.03  |
| 50017.00 J10 | M-011260- ephrin-A2                      | 1943.00 EFNA2    | 4.88         | 1.05  |
| 50017.00 J11 | M-011480- insulin receptor substrate 4   | 8471.00 IRS4     | 1.93         | 1.90  |
| 50017.00 J12 | M-006369- ephrin-A1                      | 1942.00 EFNA1    | 2.63         | 1.20  |
| 50017.00 J13 | M-007999- integrin, alpha 10             | 8515.00 ITGA10   | 3.79         | 0.04  |
| 50017.00 J14 | M-011024- endothelin 3                   | 1908.00 EDN3     | 1.93         | 1.90  |
| 50017.00 J15 | M-004566- integrin, alpha 2 (CD49B, alp  | 3673.00 ITGA2    | 2.07         | 1.76  |
| 50017.00 J16 | M-016692- endothelin 1                   | 1906.00 EDN1     | 0.88         | 2.95  |
| 50017.00 J17 | M-008001- integrin, alpha 2b (platelet g | 3674.00 ITGA2B   | 5.64         | 1.81  |
| 50017.00 J18 | M-017593- EGF-like repeats and discoidi  | 10085.00 EDIL3   | 3.56         | 0.27  |
| 50017.00 J19 | M-004571- integrin, alpha 3 (antigen CD  | 3675.00 ITGA3    | 7.10         | 3.27  |
| 50017.00 J20 | M-003654- ectodysplasin A                | 1896.00 EDA      | <u>10.19</u> | 6.36  |
| 50017.00 J21 | M-005189- integrin, alpha 4 (antigen CD  | 3676.00 ITGA4    | <u>13.49</u> | 9.66  |
| 50017.00 J23 | M-008003- integrin, alpha 5 (fibronectin | 3678.00 ITGA5    | 5.47         | 1.64  |
| 50017.00 K02 | M-014014- hepcidin antimicrobial peptid  | 57817.00 HAMP    | 2.47         | 1.36  |
| 50017.00 K04 | M-017724- gastrin-releasing peptide      | 2922.00 GRP      | 3.49         | 0.34  |
| 50017.00 K05 | M-011975- CD8b molecule                  | 926.00 CD8B      | 5.76         | 1.93  |
| 50017.00 K06 | M-019220- growth factor receptor-boun    | 2885.00 GRB2     | 7.92         | 4.09  |
| 50017.00 K07 | M-011902- CDK2-associated protein 1      | 8099.00 CDK2AP1  | 4.37         | 0.54  |
| 50017.00 K08 | M-021356- glycoprotein VI (platelet)     | 51206.00 GP6     | 7.58         | 3.75  |
| 50017.00 K09 | M-013210- glycoprotein hormones, alph    | 1081.00 CGA      | 5.27         | 1.44  |
| 50017.00 K10 | M-011045- glycoprotein Ib (platelet), al | 2811.00 GP1BA    | 1.95         | 1.88  |
| 50017.00 K11 | M-011609- chromogranin B (secretograr    | 1114.00 CHGB     | 3.53         | 0.30  |
| 50017.00 K12 | M-011288- gonadotropin-releasing horn    | 2797.00 GNRH2    | 9.45         | 5.62  |
| 50017.00 K13 | M-010709- chemokine-like factor          | 51192.00 CKLF    | 5.77         | 1.94  |
| 50017.00 K14 | M-015410- gonadotropin-releasing horn    | 2796.00 GNRH1    | 4.75         | 0.92  |
| 50017.00 K15 | M-010749- CKLF-like MARVEL transmem      | 112616.00 CMTM7  | 4.28         | 0.45  |
| 50017.00 K16 | M-010597- golgi apparatus protein 1      | 2734.00 GLG1     | 3.72         | 0.11  |
| 50017.00 K17 | M-020622- cardiotrophin-like cytokine f  | 23529.00 CLCF1   | 5.34         | 1.51  |
| 50017.00 K18 | M-019781- gastric inhibitory polypeptid  | 2695.00 GIP      | 2.91         | 0.92  |
| 50017.00 K19 | M-021142- C-type lectin domain family    | 51266.00 CLEC1B  | <u>14.50</u> | 10.67 |
| 50017.00 K20 | M-020860- ghrelin/obestatin preprohor    | 51738.00 GHRL    | 10.42        | 6.59  |
| 50017.00 K21 | M-021373- C-type lectin domain family    | 338339.00 CLEC4D | 15.31        | 11.48 |

|              |                                           |                |       |       |
|--------------|-------------------------------------------|----------------|-------|-------|
| 50017.00 K23 | M-011125- ciliary neurotrophic factor     | 1270.00 CNTF   | 5.77  | 1.94  |
| 50017.00 L02 | M-004069- dishevelled, dsh homolog 2 (    | 1856.00 DVL2   | 2.18  | 1.65  |
| 50017.00 L04 | M-004068- dishevelled, dsh homolog 1 (    | 1855.00 DVL1   | 4.12  | 0.29  |
| 50017.00 L05 | M-007214- integrin, alpha 6               | 3655.00 ITGA6  | 8.08  | 4.25  |
| 50017.00 L06 | M-019624- heparin-binding EGF-like gro    | 1839.00 HBEGF  | 3.77  | 0.06  |
| 50017.00 L07 | M-008004- integrin, alpha 7               | 3679.00 ITGA7  | 5.56  | 1.73  |
| 50017.00 L08 | M-019050- docking protein 5               | 55816.00 DOK5  | 4.57  | 0.74  |
| 50017.00 L09 | M-010699- integrin, alpha 8               | 8516.00 ITGA8  | 6.76  | 2.93  |
| 50017.00 L10 | M-015871- docking protein 4               | 55715.00 DOK4  | 3.29  | 0.54  |
| 50017.00 L11 | M-008005- integrin, alpha 9               | 3680.00 ITGA9  | 5.59  | 1.76  |
| 50017.00 L12 | M-011562- docking protein 2, 56kDa        | 9046.00 DOK2   | 3.13  | 0.70  |
| 50017.00 L13 | M-008006- integrin, alpha E (antigen CD   | 3682.00 ITGAE  | 3.23  | 0.60  |
| 50017.00 L14 | M-007883- deleted in malignant brain tu   | 1755.00 DMBT1  | 8.50  | 4.67  |
| 50017.00 L15 | M-008007- integrin, alpha L (antigen CD   | 3683.00 ITGAL  | 9.25  | 5.42  |
| 50017.00 L16 | M-010490- delta-like 4 (Drosophila)       | 54567.00 DLL4  | 2.58  | 1.25  |
| 50017.00 L17 | M-008008- integrin, alpha M (compleme     | 3684.00 ITGAM  | 3.34  | 0.49  |
| 50017.00 L18 | M-013247- glycoprotein Ib (platelet), be  | 2812.00 GP1BB  | 3.11  | 0.72  |
| 50017.00 L19 | M-008009- integrin, alpha X (compleme     | 3687.00 ITGAX  | 11.74 | 7.91  |
| 50017.00 L20 | M-017473- left-right determination facti  | 7044.00 LEFTY2 | 4.74  | 0.91  |
| 50017.00 L21 | M-004506- integrin, beta 1 (fibronectin I | 3688.00 ITGB1  | 18.25 | 14.42 |
| 50017.00 L23 | M-008010- integrin, beta 2 (complemen     | 3689.00 ITGB2  | 5.94  | 2.11  |
| 50017.00 M02 | M-019005- growth hormone releasing h      | 2691.00 GHRH   | 2.11  | 1.72  |
| 50017.00 M04 | M-011668- growth hormone 2                | 2689.00 GH2    | 5.27  | 1.44  |
| 50017.00 M05 | M-007859- complement component (3b        | 1378.00 CR1    | 5.17  | 1.34  |
| 50017.00 M06 | M-007915- GDNF family receptor alpha .    | 2676.00 GFRA3  | 6.54  | 2.71  |
| 50017.00 M07 | M-007861- complement component (3d        | 1380.00 CR2    | 4.82  | 0.99  |
| 50017.00 M08 | M-011040- glial cell derived neurotrophi  | 2668.00 GDNF   | 6.28  | 2.45  |
| 50017.00 M09 | M-011165- corticotropin releasing horm    | 1392.00 CRH    | 8.55  | 4.72  |
| 50017.00 M10 | M-012040- growth differentiation factor   | 2661.00 GDF9   | 4.22  | 0.39  |
| 50017.00 M11 | M-017514- colony stimulating factor 1 (I  | 1435.00 CSF1   | 4.88  | 1.05  |
| 50017.00 M12 | M-012039- growth differentiation factor   | 2660.00 GDF8   | 8.45  | 4.62  |
| 50017.00 M13 | M-011166- colony stimulating factor 2 (I  | 1437.00 CSF2   | 12.89 | 9.06  |
| 50017.00 M14 | M-012271- growth differentiation factor   | 8200.00 GDF5   | 6.93  | 3.10  |
| 50017.00 M15 | M-007865- colony stimulating factor 2 r   | 1439.00 CSF2RB | 8.36  | 4.53  |
| 50017.00 M16 | M-013233- growth differentiation factor   | 2658.00 GDF2   | 3.15  | 0.68  |
| 50017.00 M17 | M-007866- colony stimulating factor 3 (I  | 1440.00 CSF3   | 4.09  | 0.26  |
| 50017.00 M18 | M-019875- growth differentiation factor   | 9518.00 GDF15  | 1.41  | 2.42  |
| 50017.00 M19 | M-007867- colony stimulating factor 3 r   | 1441.00 CSF3R  | 10.54 | 6.71  |
| 50017.00 M20 | M-012086- growth differentiation factor   | 10220.00 GDF11 | 7.77  | 3.94  |
| 50017.00 M21 | M-010962- chorionic somatomammotro        | 1444.00 CSHL1  | 2.15  | 1.68  |
| 50017.00 M23 | M-020183- cardiotrophin 1                 | 1489.00 CTF1   | 1.99  | 1.84  |
| 50017.00 N02 | M-020079- neuromedin U                    | 10874.00 NMU   | 2.43  | 1.40  |
| 50017.00 N04 | M-003950- neuromedin B                    | 4828.00 NMB    | 2.66  | 1.17  |
| 50017.00 N05 | M-004124- integrin, beta 3 (platelet gly  | 3690.00 ITGB3  | 2.38  | 1.45  |

|              |                                            |                  |       |       |
|--------------|--------------------------------------------|------------------|-------|-------|
| 50017.00 N06 | M-019673- nerve growth factor, beta pc     | 4803.00 NGFB     | 4.80  | 0.97  |
| 50017.00 N07 | M-017722- integrin beta 3 binding prote    | 23421.00 ITGB3BP | 3.48  | 0.35  |
| 50017.00 N08 | M-011091- Norrie disease (pseudogliom      | 4693.00 NDP      | 4.12  | 0.29  |
| 50017.00 N09 | M-008011- integrin, beta 4                 | 3691.00 ITGB4    | 4.97  | 1.14  |
| 50017.00 N10 | M-019547- NCK adaptor protein 2            | 8440.00 NCK2     | 4.20  | 0.37  |
| 50017.00 N11 | M-004125- integrin, beta 5                 | 3693.00 ITGB5    | 8.12  | 4.29  |
| 50017.00 N12 | M-006354- NCK adaptor protein 1            | 4690.00 NCK1     | 4.11  | 0.28  |
| 50017.00 N13 | M-008012- integrin, beta 6                 | 3694.00 ITGB6    | 7.38  | 3.55  |
| 50017.00 N14 | M-004769- myeloid differentiation prim     | 4615.00 MYD88    | 11.57 | 7.74  |
| 50017.00 N15 | M-017187- jagged 2                         | 3714.00 JAG2     | 8.57  | 4.74  |
| 50017.00 N16 | M-011730- mannose receptor, C type 1       | 4360.00 MRC1     | 2.07  | 1.76  |
| 50017.00 N17 | M-011184- KIT ligand                       | 4254.00 KITLG    | 10.81 | 6.98  |
| 50017.00 N18 | M-020116- melanoma inhibitory activity     | 8190.00 MIA      | 4.36  | 0.53  |
| 50017.00 N19 | M-020139- killer cell lectin-like receptor | 10748.00 KLRA1   | 10.00 | 6.17  |
| 50017.00 N20 | M-003677- midkine (neurite growth-pro      | 4192.00 MDK      | 7.40  | 3.57  |
| 50017.00 N21 | M-013593- killer cell lectin-like receptor | 8302.00 KLRC4    | 19.58 | 15.75 |
| 50017.00 N23 | M-011304- killer cell lectin-like receptor | 3824.00 KLRD1    | 14.37 | 10.54 |
| 50017.00 O02 | M-011976- growth differentiation factor    | 2662.00 GDF10    | 2.26  | 1.57  |
| 50017.00 O04 | M-013088- growth differentiation factor    | 2657.00 GDF1     | 7.47  | 3.64  |
| 50017.00 O05 | M-007870- chemokine (C-X3-C motif) lig     | 6376.00 CX3CL1   | 0.90  | 2.93  |
| 50017.00 O06 | M-011174- gastrin                          | 2520.00 GAST     | 2.40  | 1.43  |
| 50017.00 O07 | M-007872- chemokine (C-X-C motif) liga     | 6373.00 CXCL11   | 1.37  | 2.46  |
| 50017.00 O08 | M-003553- GRB2-associated binding pro      | 2549.00 GAB1     | 8.15  | 4.32  |
| 50017.00 O09 | M-007874- chemokine (C-X-C motif) liga     | 10563.00 CXCL13  | 2.28  | 1.55  |
| 50017.00 O10 | M-012537- follicle stimulating hormone,    | 2488.00 FSHB     | 8.88  | 5.05  |
| 50017.00 O11 | M-021477- cytoplasmic FMR1 interactin      | 26999.00 CYFIP2  | 5.02  | 1.19  |
| 50017.00 O12 | M-020173- frizzled-related protein         | 2487.00 FRZB     | 2.39  | 1.44  |
| 50017.00 O13 | M-010452- dystroglycan 1 (dystrophin-a     | 1605.00 DAG1     | 1.36  | 2.47  |
| 50017.00 O14 | M-019038- fibroblast growth factor rece    | 10817.00 FRS3    | 3.42  | 0.41  |
| 50017.00 O15 | M-006488- diazepam binding inhibitor (     | 1622.00 DBI      | 4.46  | 0.63  |
| 50017.00 O16 | M-011190- folate receptor 3 (gamma)        | 2352.00 FOLR3    | 4.99  | 1.16  |
| 50017.00 O17 | M-018909- CD302 molecule                   | 9936.00 CD302    | 1.88  | 1.95  |
| 50017.00 O18 | M-009506- delta-like 3 (Drosophila)        | 10683.00 DLL3    | 3.25  | 0.58  |
| 50017.00 O19 | M-011986- DiGeorge syndrome critical r     | 9993.00 DGCR2    | 5.79  | 1.96  |
| 50017.00 O20 | M-008495- discs, large homolog 5 (Dros     | 9231.00 DLG5     | 4.80  | 0.97  |
| 50017.00 O21 | M-010347- diaphanous homolog 1 (Dros       | 1729.00 DIAPH1   | 2.90  | 0.93  |
| 50017.00 O23 | M-027334- cortistatin                      | 1325.00 CORT     | 1.96  | 1.87  |
| 50017.00 P02 | M-015362- SMAD family member 6             | 4091.00 SMAD6    | 2.05  | 1.78  |
| 50017.00 P04 | M-020015- CD180 molecule                   | 4064.00 CD180    | 10.97 | 7.14  |
| 50017.00 P05 | M-020680- killer cell lectin-like receptor | 51348.00 KLRF1   | 3.52  | 0.31  |
| 50017.00 P06 | M-008023- lymphotoxin beta receptor (      | 4055.00 LTBR     | 4.36  | 0.53  |
| 50017.00 P07 | M-021505- lamin B receptor                 | 3930.00 LBR      | 1.81  | 2.02  |
| 50017.00 P08 | M-019552- latent transforming growth f     | 8425.00 LTBP4    | 2.04  | 1.79  |
| 50017.00 P09 | M-011074- leptin (obesity homolog, mo      | 3952.00 LEP      | 2.28  | 1.55  |

|              |                                            |          |           |       |      |
|--------------|--------------------------------------------|----------|-----------|-------|------|
| 50017.00 P10 | M-010521- lymphotoxin beta (TNF super      | 4050.00  | LTB       | 2.66  | 1.17 |
| 50017.00 P11 | M-011718- lectin, galactoside-binding, s   | 3956.00  | LGALS1    | 9.07  | 5.24 |
| 50017.00 P12 | M-010520- lymphotoxin alpha (TNF super     | 4049.00  | LTA       | 2.45  | 1.38 |
| 50017.00 P13 | M-008016- lectin, galactoside-binding, s   | 3959.00  | LGALS3BP  | 3.23  | 0.60 |
| 50017.00 P14 | M-012640- lymphocyte-specific protein      | 4046.00  | LSP1      | 2.12  | 1.71 |
| 50017.00 P15 | M-011319- lectin, galactoside-binding, s   | 3965.00  | LGALS9    | 3.28  | 0.55 |
| 50017.00 P16 | M-003610- low density lipoprotein recej    | 4043.00  | LRPAP1    | 5.81  | 1.98 |
| 50017.00 P17 | M-011183- luteinizing hormone beta po      | 3972.00  | LHB       | 2.16  | 1.67 |
| 50017.00 P18 | M-011802- low density lipoprotein recej    | 7804.00  | LRP8      | 4.19  | 0.36 |
| 50017.00 P19 | M-012491- C-type lectin domain family 2    | 29121.00 | CLEC2D    | 10.12 | 6.29 |
| 50017.00 P20 | M-003845- low density lipoprotein recej    | 4040.00  | LRP6      | 3.67  | 0.16 |
| 50017.00 P21 | M-010665- low density lipoprotein-relat    | 53353.00 | LRP1B     | 3.98  | 0.15 |
| 50017.00 P23 | M-012673- low density lipoprotein-relat    | 4036.00  | LRP2      | 3.09  | 0.74 |
|              |                                            |          | mdmdMAI   | 3.83  | 1.69 |
|              |                                            |          | 3MAD      | 11.48 | 5.08 |
|              |                                            |          | MADc      |       | 2.51 |
| 50017.00 C22 |                                            | 2198.00  | 12.06     |       |      |
| 50017.00 D22 |                                            |          |           | 21.81 |      |
| 50017.00 E22 |                                            |          |           | 32.56 |      |
| 50017.00 F22 |                                            |          |           | 24.49 |      |
|              |                                            |          | mn        | 26.28 |      |
|              |                                            |          | sd        | 5.60  |      |
| 50017.00 G22 |                                            | 456.00   | 16.67     | 4.47  |      |
| 50017.00 H22 |                                            |          |           | 2.67  |      |
| 50017.00 I22 |                                            |          |           | 1.60  |      |
| 50017.00 J22 |                                            |          |           | 0.74  |      |
|              |                                            |          | mn        | 2.37  |      |
|              |                                            |          | sd        | 1.61  |      |
|              |                                            |          |           | 16.79 |      |
|              |                                            |          |           | 4.82  |      |
|              |                                            |          |           | 21.61 |      |
|              |                                            |          |           | 23.91 |      |
|              |                                            |          |           | 0.90  |      |
|              |                                            |          |           | 0.10  |      |
| 50017.00 G03 | M-003290- polo-like kinase 1 (Drosophil    | 5347.00  | PLK1 SMAF | 2.38  |      |
| 50017.00 H03 | M-003290- polo-like kinase 1 (Drosophil    | 5347.00  | PLK1 SMAF | 1.66  |      |
| 50017.00 I03 | D-001206- siControl non-targeting siRNA #2 |          |           | 1.42  |      |
| 50017.00 J03 | D-001206- siControl non-targeting siRNA #2 |          |           | 3.82  |      |

50017.00 K03  
50017.00 L03

D-001600-(siGLO RISC-free siRNA  
D-001600-(siGLO RISC-free siRNA

11.49  
9.11

| robust Z | % inf | abs dev | robust Z | % inf | abs dev | robust Z |               |
|----------|-------|---------|----------|-------|---------|----------|---------------|
| -1.46    | 1.24  | 4.93    | -1.24    | 2.55  | 3.25    | -0.92    |               |
| -0.07    | 5.11  | 1.06    | -0.27    | 5.10  | 0.70    | -0.20    |               |
| -0.50    | 14.36 | 8.19    | 2.07     | 15.25 | 9.45    | 2.69     | x toxic a,b   |
| -0.29    | 3.31  | 2.86    | -0.72    | 7.98  | 2.18    | 0.62     |               |
| -1.25    | 1.53  | 4.64    | -1.17    | 3.33  | 2.47    | -0.70    |               |
| -0.70    | 1.96  | 4.21    | -1.06    | 4.94  | 0.86    | -0.24    |               |
| -1.09    | 4.10  | 2.07    | -0.52    | 8.26  | 2.46    | 0.70     |               |
| -1.01    | 2.83  | 3.34    | -0.84    | 3.08  | 2.72    | -0.77    |               |
| -0.78    | 5.59  | 0.58    | -0.15    | 4.51  | 1.29    | -0.37    |               |
| -0.56    | 6.12  | 0.05    | -0.01    | 9.35  | 3.55    | 1.01     |               |
| -0.28    | 6.49  | 0.32    | 0.08     | 5.61  | 0.19    | -0.05    |               |
| 2.72     | 14.59 | 8.42    | 2.12     | 15.21 | 9.41    | 2.68     | y             |
| -0.75    | 6.81  | 0.64    | 0.16     | 5.48  | 0.32    | -0.09    |               |
| 0.49     | 7.14  | 0.97    | 0.24     | 12.28 | 6.48    | 1.85     |               |
| -0.58    | 5.79  | 0.38    | -0.10    | 4.20  | 1.60    | -0.46    |               |
| 0.52     | 6.43  | 0.26    | 0.07     | 13.13 | 7.33    | 2.09     |               |
| -0.77    | 11.10 | 4.93    | 1.24     | 10.95 | 5.15    | 1.47     |               |
| 0.82     | 13.26 | 7.09    | 1.79     | 24.21 | 18.41   | 5.24     |               |
| 0.25     | 14.94 | 8.77    | 2.21     | 12.40 | 6.60    | 1.88     |               |
| 2.02     | 20.55 | 14.38   | 3.63     | 10.50 | 4.70    | 1.34     | x toxic a,b,c |
| -1.42    | 11.39 | 5.22    | 1.32     | 0.41  | 5.39    | -1.53    |               |
| -1.26    | 4.42  | 1.75    | -0.44    | 0.64  | 5.16    | -1.47    |               |
| -0.86    | 4.72  | 1.45    | -0.37    | 2.05  | 3.75    | -1.07    |               |
| -0.26    | 6.79  | 0.62    | 0.16     | 3.43  | 2.37    | -0.67    |               |
| -1.21    | 7.42  | 1.25    | 0.32     | 0.73  | 5.07    | -1.44    |               |
| -0.50    | 14.84 | 8.67    | 2.19     | 10.07 | 4.27    | 1.21     |               |
| -0.11    | 13.60 | 7.43    | 1.87     | 3.20  | 2.60    | -0.74    |               |
| -0.14    | 6.51  | 0.34    | 0.09     | 1.24  | 4.56    | -1.30    |               |
| 0.06     | 11.01 | 4.84    | 1.22     | 3.37  | 2.43    | -0.69    |               |
| -0.13    | 10.56 | 4.39    | 1.11     | 4.48  | 1.32    | -0.38    |               |
| -0.77    | 5.21  | 0.96    | -0.24    | 3.73  | 2.07    | -0.59    |               |
| 0.02     | 3.71  | 2.46    | -0.62    | 1.40  | 4.40    | -1.25    |               |
| -0.03    | 7.10  | 0.93    | 0.23     | 2.94  | 2.86    | -0.81    |               |
| -0.69    | 3.38  | 2.79    | -0.70    | 2.53  | 3.27    | -0.93    |               |
| -1.13    | 3.53  | 2.64    | -0.67    | 4.81  | 0.99    | -0.28    |               |
| -0.93    | 3.55  | 2.62    | -0.66    | 3.66  | 2.14    | -0.61    |               |
| 0.92     | 4.49  | 1.68    | -0.42    | 12.26 | 6.46    | 1.84     |               |
| -0.12    | 1.98  | 4.19    | -1.06    | 10.07 | 4.27    | 1.21     |               |
| 1.77     | 3.47  | 2.70    | -0.68    | 11.75 | 5.95    | 1.69     |               |
| -0.25    | 5.59  | 0.58    | -0.15    | 8.91  | 3.11    | 0.89     |               |
| -1.10    | 4.12  | 2.05    | -0.52    | 1.24  | 4.56    | -1.30    |               |
| 0.11     | 2.79  | 3.38    | -0.85    | 2.89  | 2.91    | -0.83    |               |
| 0.09     | 3.26  | 2.91    | -0.73    | 2.35  | 3.45    | -0.98    |               |

|       |       |       |       |       |       |        |
|-------|-------|-------|-------|-------|-------|--------|
| -0.07 | 5.21  | 0.96  | -0.24 | 1.67  | 4.13  | -1.18  |
| -1.21 | 1.69  | 4.48  | -1.13 | 0.76  | 5.04  | -1.43  |
| 0.97  | 9.80  | 3.63  | 0.92  | 13.12 | 7.32  | 2.08   |
| -0.81 | 4.48  | 1.69  | -0.43 | 1.37  | 4.43  | -1.26  |
| -0.72 | 6.57  | 0.40  | 0.10  | 2.26  | 3.54  | -1.01  |
| -0.37 | 5.87  | 0.30  | -0.08 | 3.76  | 2.04  | -0.58  |
| -0.50 | 12.50 | 6.33  | 1.60  | 8.49  | 2.69  | 0.77   |
| -0.32 | 2.17  | 4.00  | -1.01 | 5.94  | 0.14  | 0.04   |
| -0.41 | 4.88  | 1.29  | -0.32 | 3.54  | 2.26  | -0.64  |
| -0.68 | 3.75  | 2.42  | -0.61 | 2.62  | 3.18  | -0.90  |
| 0.17  | 8.83  | 2.66  | 0.67  | 4.88  | 0.92  | -0.26  |
| 0.68  | 3.98  | 2.19  | -0.55 | 6.89  | 1.09  | 0.31   |
| -0.85 | 4.30  | 1.87  | -0.47 | 8.38  | 2.58  | 0.74   |
| 0.07  | 8.55  | 2.38  | 0.60  | 6.03  | 0.23  | 0.07   |
| 3.35  | 19.36 | 13.19 | 3.33  | 22.11 | 16.31 | 4.64 y |
| -0.70 | 5.55  | 0.62  | -0.16 | 6.46  | 0.66  | 0.19   |
| 1.20  | 16.27 | 10.10 | 2.55  | 5.42  | 0.38  | -0.11  |
| -1.05 | 0.36  | 5.81  | -1.47 | 1.36  | 4.44  | -1.26  |
| 1.58  | 9.93  | 3.76  | 0.95  | 7.51  | 1.71  | 0.49   |
| 0.47  | 2.62  | 3.55  | -0.90 | 2.55  | 3.25  | -0.92  |
| 0.51  | 2.16  | 4.01  | -1.01 | 0.91  | 4.89  | -1.39  |
| -0.61 | 1.42  | 4.75  | -1.20 | 1.39  | 4.41  | -1.25  |
| -0.34 | 4.12  | 2.05  | -0.52 | 3.88  | 1.92  | -0.55  |
| -0.67 | 2.16  | 4.01  | -1.01 | 3.44  | 2.36  | -0.67  |
| 0.65  | 2.50  | 3.67  | -0.92 | 2.08  | 3.72  | -1.06  |
| 0.83  | 2.28  | 3.89  | -0.98 | 1.48  | 4.32  | -1.23  |
| -0.15 | 3.19  | 2.98  | -0.75 | 2.49  | 3.31  | -0.94  |
| -0.56 | 1.09  | 5.08  | -1.28 | 2.69  | 3.11  | -0.89  |
| 1.42  | 5.85  | 0.32  | -0.08 | 4.68  | 1.12  | -0.32  |
| 0.40  | 1.94  | 4.23  | -1.07 | 0.30  | 5.50  | -1.57  |
| 1.29  | 3.01  | 3.16  | -0.80 | 3.20  | 2.60  | -0.74  |
| 0.84  | 3.61  | 2.56  | -0.65 | 4.33  | 1.47  | -0.42  |
| 2.08  | 1.77  | 4.40  | -1.11 | 3.64  | 2.16  | -0.61  |
| -0.16 | 4.86  | 1.31  | -0.33 | 6.44  | 0.64  | 0.18   |
| 3.01  | 6.56  | 0.39  | 0.10  | 3.42  | 2.38  | -0.68  |
| 3.26  | 1.86  | 4.31  | -1.09 | 11.37 | 5.57  | 1.59   |
| 0.22  | 2.61  | 3.57  | -0.90 | 4.28  | 1.52  | -0.43  |
| -0.46 | 3.52  | 2.65  | -0.67 | 2.53  | 3.27  | -0.93  |
| -0.47 | 3.94  | 2.23  | -0.56 | 0.51  | 5.29  | -1.50  |
| 0.11  | 7.45  | 1.28  | 0.32  | 6.85  | 1.05  | 0.30   |
| -0.80 | 2.84  | 3.33  | -0.84 | 2.01  | 3.79  | -1.08  |
| 0.10  | 5.68  | 0.49  | -0.12 | 4.34  | 1.46  | -0.42  |
| 1.88  | 30.40 | 24.23 | 6.11  | 4.46  | 1.34  | -0.38  |
| 0.36  | 5.31  | 0.86  | -0.22 | 3.43  | 2.37  | -0.67  |



|       |       |       |       |       |       |        |
|-------|-------|-------|-------|-------|-------|--------|
| -0.55 | 2.18  | 3.99  | -1.01 | 0.75  | 5.05  | -1.44  |
| -0.18 | 10.73 | 4.56  | 1.15  | 3.19  | 2.61  | -0.74  |
| 2.45  | 8.92  | 2.75  | 0.69  | 10.55 | 4.75  | 1.35   |
| 0.06  | 2.90  | 3.27  | -0.82 | 1.38  | 4.42  | -1.26  |
| -0.13 | 9.23  | 3.06  | 0.77  | 4.82  | 0.98  | -0.28  |
| 2.01  | 15.56 | 9.39  | 2.37  | 11.12 | 5.32  | 1.51   |
| 4.20  | 11.66 | 5.49  | 1.38  | 18.52 | 12.72 | 3.62 y |
| 3.58  | 9.50  | 3.33  | 0.84  | 5.06  | 0.74  | -0.21  |
| 0.71  | 6.78  | 0.61  | 0.15  | 7.41  | 1.61  | 0.46   |
| 2.69  | 15.75 | 9.58  | 2.42  | 12.82 | 7.02  | 2.00 y |
| 0.11  | 2.12  | 4.05  | -1.02 | 4.32  | 1.48  | -0.42  |
| 2.22  | 10.52 | 4.35  | 1.10  | 12.71 | 6.91  | 1.97   |
| 1.36  | 13.93 | 7.76  | 1.96  | 5.88  | 0.08  | 0.02   |
| 0.09  | 3.51  | 2.66  | -0.67 | 3.28  | 2.52  | -0.72  |
| -0.70 | 3.46  | 2.71  | -0.68 | 5.17  | 0.63  | -0.18  |
| 0.55  | 8.99  | 2.82  | 0.71  | 5.31  | 0.49  | -0.14  |
| -0.24 | 6.27  | 0.10  | 0.03  | 7.42  | 1.62  | 0.46   |
| -0.74 | 2.70  | 3.47  | -0.87 | 6.67  | 0.87  | 0.25   |
| -0.29 | 6.19  | 0.02  | 0.01  | 4.26  | 1.54  | -0.44  |
| -0.75 | 1.88  | 4.29  | -1.08 | 3.92  | 1.88  | -0.53  |
| -0.22 | 7.54  | 1.37  | 0.35  | 6.57  | 0.77  | 0.22   |
| -0.61 | 3.29  | 2.88  | -0.73 | 4.36  | 1.44  | -0.41  |
| 0.62  | 3.44  | 2.73  | -0.69 | 2.30  | 3.50  | -1.00  |
| -0.11 | 5.54  | 0.63  | -0.16 | 7.84  | 2.04  | 0.58   |
| 0.25  | 10.02 | 3.85  | 0.97  | 6.95  | 1.15  | 0.33   |
| -0.52 | 5.94  | 0.24  | -0.06 | 4.18  | 1.62  | -0.46  |
| 0.66  | 16.43 | 10.26 | 2.59  | 4.91  | 0.89  | -0.25  |
| 1.80  | 8.97  | 2.80  | 0.71  | 4.97  | 0.83  | -0.24  |
| 4.39  | 9.01  | 2.84  | 0.72  | 4.25  | 1.55  | -0.44  |
| 3.20  | 6.86  | 0.69  | 0.17  | 5.30  | 0.50  | -0.14  |
| 5.20  | 12.54 | 6.37  | 1.61  | 8.56  | 2.76  | 0.79   |
| 1.45  | 4.34  | 1.83  | -0.46 | 4.06  | 1.74  | -0.49  |
| 1.40  | 3.77  | 2.40  | -0.60 | 4.62  | 1.18  | -0.34  |
| 1.71  | 14.58 | 8.41  | 2.12  | 19.47 | 13.67 | 3.89 y |
| 8.61  | 26.46 | 20.29 | 5.12  | 39.26 | 33.46 | 9.52 y |
| -0.46 | 0.79  | 5.38  | -1.36 | 4.18  | 1.62  | -0.46  |
| -0.09 | 7.27  | 1.10  | 0.28  | 10.12 | 4.32  | 1.23   |
| -0.42 | 3.42  | 2.75  | -0.69 | 8.48  | 2.68  | 0.76   |
| -1.13 | 9.64  | 3.47  | 0.88  | 3.70  | 2.10  | -0.60  |
| -0.77 | 5.08  | 1.09  | -0.28 | 5.82  | 0.02  | 0.01   |
| 0.72  | 11.58 | 5.41  | 1.36  | 14.53 | 8.73  | 2.49   |
| -1.17 | 10.94 | 4.77  | 1.20  | 8.12  | 2.32  | 0.66   |
| 1.05  | 9.04  | 2.87  | 0.72  | 8.32  | 2.52  | 0.72   |
| -0.26 | 6.55  | 0.38  | 0.10  | 12.47 | 6.67  | 1.90   |

|       |       |       |       |       |       |        |
|-------|-------|-------|-------|-------|-------|--------|
| 0.33  | 7.35  | 1.18  | 0.30  | 7.97  | 2.17  | 0.62   |
| 0.12  | 4.56  | 1.61  | -0.41 | 6.04  | 0.24  | 0.07   |
| 1.05  | 6.31  | 0.14  | 0.04  | 9.65  | 3.85  | 1.10   |
| 0.79  | 10.28 | 4.11  | 1.04  | 11.08 | 5.28  | 1.50   |
| -0.23 | 7.36  | 1.19  | 0.30  | 6.36  | 0.56  | 0.16   |
| 0.29  | 10.80 | 4.63  | 1.17  | 6.91  | 1.11  | 0.32   |
| 1.05  | 9.01  | 2.84  | 0.72  | 7.02  | 1.22  | 0.35   |
| 0.18  | 4.33  | 1.84  | -0.46 | 2.78  | 3.02  | -0.86  |
| 0.56  | 8.59  | 2.42  | 0.61  | 9.03  | 3.23  | 0.92   |
| -0.12 | 8.90  | 2.73  | 0.69  | 7.22  | 1.42  | 0.41   |
| 4.07  | 21.00 | 14.83 | 3.74  | 18.48 | 12.68 | 3.61 y |
| -0.06 | 5.95  | 0.22  | -0.05 | 5.79  | 0.01  | 0.00   |
| 0.34  | 8.38  | 2.21  | 0.56  | 8.32  | 2.52  | 0.72   |
| 0.07  | 14.29 | 8.12  | 2.05  | 10.15 | 4.35  | 1.24   |
| -0.99 | 10.81 | 4.64  | 1.17  | 1.10  | 4.70  | -1.34  |
| -1.22 | 3.53  | 2.64  | -0.67 | 4.55  | 1.25  | -0.36  |
| 0.03  | 8.81  | 2.64  | 0.67  | 15.78 | 9.98  | 2.84   |
| -0.86 | 6.85  | 0.68  | 0.17  | 8.04  | 2.24  | 0.64   |
| -0.69 | 3.46  | 2.71  | -0.68 | 7.19  | 1.39  | 0.40   |
| -0.99 | 4.76  | 1.41  | -0.35 | 1.61  | 4.19  | -1.19  |
| -0.61 | 5.24  | 0.93  | -0.23 | 4.09  | 1.71  | -0.49  |
| -1.15 | 5.90  | 0.27  | -0.07 | 4.63  | 1.17  | -0.33  |
| -0.70 | 6.09  | 0.08  | -0.02 | 5.84  | 0.04  | 0.01   |
| 0.21  | 6.75  | 0.58  | 0.15  | 5.91  | 0.11  | 0.03   |
| 1.60  | 16.45 | 10.28 | 2.59  | 16.63 | 10.83 | 3.08 y |
| -0.69 | 7.56  | 1.39  | 0.35  | 5.04  | 0.76  | -0.22  |
| -0.48 | 14.05 | 7.88  | 1.99  | 2.51  | 3.29  | -0.94  |
| -0.81 | 5.24  | 0.93  | -0.24 | 2.42  | 3.38  | -0.96  |
| -0.10 | 7.25  | 1.08  | 0.27  | 5.50  | 0.30  | -0.08  |
| -0.82 | 6.91  | 0.74  | 0.19  | 6.44  | 0.64  | 0.18   |
| -0.56 | 12.96 | 6.79  | 1.71  | 5.26  | 0.54  | -0.15  |
| 0.91  | 15.12 | 8.95  | 2.26  | 13.23 | 7.43  | 2.12 x |
| -1.15 | 7.27  | 1.10  | 0.28  | 1.66  | 4.14  | -1.18  |
| 0.30  | 5.02  | 1.15  | -0.29 | 5.70  | 0.10  | -0.03  |
| 1.83  | 22.92 | 16.75 | 4.22  | 16.03 | 10.23 | 2.91 y |
| -0.52 | 10.46 | 4.29  | 1.08  | 10.93 | 5.13  | 1.46   |
| 0.47  | 13.62 | 7.45  | 1.88  | 9.21  | 3.41  | 0.97   |
| -0.83 | 5.72  | 0.45  | -0.11 | 3.65  | 2.15  | -0.61  |
| -0.78 | 17.00 | 10.83 | 2.73  | 7.81  | 2.01  | 0.57   |
| 0.01  | 8.61  | 2.44  | 0.62  | 4.20  | 1.60  | -0.46  |
| -0.28 | 8.52  | 2.35  | 0.59  | 5.91  | 0.11  | 0.03   |
| -0.48 | 12.29 | 6.12  | 1.54  | 5.32  | 0.48  | -0.14  |
| -1.01 | 5.15  | 1.02  | -0.26 | 5.67  | 0.13  | -0.04  |
| -0.73 | 7.16  | 0.99  | 0.25  | 6.10  | 0.30  | 0.09   |

toxic a,b

|       |              |      |       |              |       |       |              |
|-------|--------------|------|-------|--------------|-------|-------|--------------|
| -0.33 | 9.47         | 3.30 | 0.83  | 11.17        | 5.37  | 1.53  |              |
| -0.90 | 6.01         | 0.16 | -0.04 | 4.78         | 1.02  | -0.29 |              |
| 0.53  | 6.75         | 0.58 | 0.15  | 8.84         | 3.04  | 0.86  |              |
| 0.81  | 12.07        | 5.90 | 1.49  | 5.97         | 0.17  | 0.05  |              |
| -0.99 | 10.50        | 4.33 | 1.09  | 2.44         | 3.36  | -0.96 |              |
| -0.60 | 5.82         | 0.35 | -0.09 | 7.59         | 1.79  | 0.51  |              |
| -0.73 | 7.11         | 0.94 | 0.24  | 2.70         | 3.10  | -0.88 |              |
| 0.60  | 11.36        | 5.19 | 1.31  | 8.81         | 3.01  | 0.86  |              |
| -0.39 | 6.81         | 0.64 | 0.16  | 3.55         | 2.25  | -0.64 |              |
| -0.04 | 8.42         | 2.25 | 0.57  | 11.59        | 5.79  | 1.65  |              |
| -1.07 | 4.02         | 2.15 | -0.54 | 2.22         | 3.58  | -1.02 |              |
| 0.01  | 4.69         | 1.48 | -0.37 | 3.59         | 2.21  | -0.63 |              |
| 0.42  | 7.62         | 1.45 | 0.36  | 12.09        | 6.29  | 1.79  |              |
| -0.76 | 5.37         | 0.80 | -0.20 | 2.86         | 2.94  | -0.84 |              |
| -0.48 | 7.20         | 1.03 | 0.26  | 7.70         | 1.90  | 0.54  |              |
| -0.01 | 5.17         | 1.00 | -0.25 | 6.46         | 0.66  | 0.19  |              |
| -0.75 | 4.14         | 2.03 | -0.51 | 3.26         | 2.54  | -0.72 |              |
| -0.70 | 13.33        | 7.16 | 1.81  | 7.97         | 2.17  | 0.62  |              |
| -1.17 | 8.51         | 2.34 | 0.59  | 1.94         | 3.86  | -1.10 |              |
| 0.72  | 10.83        | 4.66 | 1.18  | 5.48         | 0.32  | -0.09 |              |
| -0.11 | 5.07         | 1.10 | -0.28 | 7.32         | 1.52  | 0.43  |              |
| 1.31  | 8.16         | 1.99 | 0.50  | 8.54         | 2.74  | 0.78  |              |
| 2.54  | <u>11.81</u> | 5.64 | 1.42  | <u>15.70</u> | 9.90  | 2.82  | y            |
| 3.85  | <u>14.41</u> | 8.24 | 2.08  | <u>14.11</u> | 8.31  | 2.37  | y            |
| 0.66  | 11.01        | 4.84 | 1.22  | 8.26         | 2.46  | 0.70  |              |
| -0.54 | 2.34         | 3.83 | -0.97 | 3.87         | 1.93  | -0.55 |              |
| -0.13 | 9.34         | 3.17 | 0.80  | 6.41         | 0.61  | 0.17  |              |
| 0.77  | 7.96         | 1.79 | 0.45  | 8.97         | 3.17  | 0.90  |              |
| 1.63  | 11.20        | 5.03 | 1.27  | 11.18        | 5.38  | 1.53  |              |
| 0.22  | 5.99         | 0.18 | -0.05 | 6.95         | 1.15  | 0.33  |              |
| 1.50  | 9.08         | 2.91 | 0.73  | 12.03        | 6.23  | 1.77  |              |
| 0.58  | 10.65        | 4.48 | 1.13  | 8.16         | 2.36  | 0.67  |              |
| -0.75 | 7.04         | 0.87 | 0.22  | 9.16         | 3.36  | 0.96  |              |
| -0.12 | 3.24         | 2.93 | -0.74 | 9.08         | 3.28  | 0.94  |              |
| 2.24  | 11.84        | 5.67 | 1.43  | 21.45        | 15.65 | 4.45  | x toxic a,b  |
| 0.78  | 4.16         | 2.01 | -0.51 | 11.21        | 5.41  | 1.54  |              |
| 0.37  | 8.13         | 1.96 | 0.49  | 7.68         | 1.88  | 0.53  |              |
| 0.18  | 8.21         | 2.04 | 0.51  | 15.47        | 9.67  | 2.75  |              |
| -0.04 | 3.52         | 2.65 | -0.67 | 4.42         | 1.38  | -0.39 |              |
| 0.60  | 7.78         | 1.61 | 0.41  | 5.84         | 0.04  | 0.01  |              |
| -0.36 | 6.13         | 0.04 | -0.01 | 8.08         | 2.28  | 0.65  |              |
| 4.26  | <u>9.19</u>  | 3.02 | 0.76  | <u>14.81</u> | 9.01  | 2.56  | y debris B,c |
| 2.63  | 7.73         | 1.56 | 0.39  | 14.21        | 8.41  | 2.39  | x            |
| 4.58  | 9.33         | 3.16 | 0.80  | 11.90        | 6.10  | 1.74  |              |

|       |       |       |       |       |       |        |
|-------|-------|-------|-------|-------|-------|--------|
| 0.78  | 5.77  | 0.40  | -0.10 | 6.35  | 0.55  | 0.16   |
| -0.66 | 6.15  | 0.02  | -0.01 | 5.60  | 0.20  | -0.06  |
| 0.12  | 6.84  | 0.67  | 0.17  | 2.86  | 2.94  | -0.83  |
| 1.70  | 9.74  | 3.57  | 0.90  | 20.10 | 14.30 | 4.07   |
| -0.02 | 5.65  | 0.52  | -0.13 | 4.74  | 1.06  | -0.30  |
| 0.69  | 2.97  | 3.20  | -0.81 | 4.76  | 1.04  | -0.30  |
| 0.30  | 3.05  | 3.12  | -0.79 | 8.07  | 2.27  | 0.65   |
| 1.17  | 5.08  | 1.09  | -0.28 | 9.69  | 3.89  | 1.11   |
| -0.21 | 2.28  | 3.89  | -0.98 | 3.95  | 1.85  | -0.53  |
| 0.70  | 2.94  | 3.23  | -0.81 | 4.48  | 1.32  | -0.38  |
| -0.28 | 1.73  | 4.44  | -1.12 | 5.63  | 0.17  | -0.05  |
| -0.24 | 1.77  | 4.40  | -1.11 | 2.96  | 2.84  | -0.81  |
| 1.87  | 4.00  | 2.17  | -0.55 | 2.61  | 3.19  | -0.91  |
| 2.16  | 5.39  | 0.78  | -0.20 | 5.09  | 0.71  | -0.20  |
| -0.50 | 1.33  | 4.84  | -1.22 | 2.12  | 3.68  | -1.05  |
| -0.19 | 5.81  | 0.36  | -0.09 | 7.50  | 1.70  | 0.48   |
| -0.28 | 2.47  | 3.70  | -0.93 | 4.21  | 1.59  | -0.45  |
| 3.16  | 15.06 | 8.89  | 2.24  | 10.80 | 5.00  | 1.42 y |
| 0.37  | 4.66  | 1.51  | -0.38 | 5.41  | 0.39  | -0.11  |
| 5.75  | 19.05 | 12.88 | 3.25  | 21.82 | 16.02 | 4.56 y |
| 0.84  | 8.13  | 1.96  | 0.50  | 8.57  | 2.77  | 0.79   |
| -0.68 | 3.00  | 3.17  | -0.80 | 2.66  | 3.14  | -0.89  |
| 0.58  | 6.39  | 0.22  | 0.06  | 4.67  | 1.13  | -0.32  |
| 0.54  | 5.32  | 0.85  | -0.21 | 6.57  | 0.77  | 0.22   |
| 1.08  | 5.51  | 0.66  | -0.17 | 5.25  | 0.55  | -0.15  |
| 0.39  | 4.94  | 1.23  | -0.31 | 6.34  | 0.54  | 0.16   |
| 0.98  | 2.92  | 3.25  | -0.82 | 4.23  | 1.57  | -0.45  |
| 1.88  | 11.76 | 5.59  | 1.41  | 10.36 | 4.56  | 1.30   |
| 0.16  | 5.78  | 0.39  | -0.10 | 6.54  | 0.74  | 0.21   |
| 0.42  | 4.93  | 1.24  | -0.31 | 8.58  | 2.78  | 0.79   |
| 1.84  | 3.00  | 3.17  | -0.80 | 7.01  | 1.21  | 0.34   |
| 3.61  | 13.79 | 7.62  | 1.92  | 16.26 | 10.46 | 2.98 y |
| 1.24  | 2.67  | 3.50  | -0.88 | 5.77  | 0.03  | -0.01  |
| 1.81  | 8.44  | 2.27  | 0.57  | 11.47 | 5.67  | 1.61   |
| -0.27 | 3.25  | 2.92  | -0.74 | 6.70  | 0.90  | 0.26   |
| 0.10  | 5.20  | 0.97  | -0.25 | 8.05  | 2.25  | 0.64   |
| -0.96 | 2.64  | 3.53  | -0.89 | 6.80  | 1.00  | 0.28   |
| 2.68  | 10.33 | 4.16  | 1.05  | 16.28 | 10.48 | 2.98 y |
| 1.57  | 6.62  | 0.45  | 0.11  | 11.00 | 5.20  | 1.48   |
| -0.67 | 2.30  | 3.87  | -0.98 | 3.27  | 2.53  | -0.72  |
| -0.73 | 3.80  | 2.37  | -0.60 | 4.44  | 1.36  | -0.39  |
| -0.55 | 5.34  | 0.83  | -0.21 | 7.60  | 1.80  | 0.51   |
| -0.47 | 1.79  | 4.38  | -1.10 | 1.58  | 4.22  | -1.20  |
| -0.57 | 7.98  | 1.81  | 0.46  | 5.80  | 0.00  | 0.00   |

|       |       |       |       |       |       |       |             |
|-------|-------|-------|-------|-------|-------|-------|-------------|
| 0.39  | 6.55  | 0.38  | 0.10  | 5.45  | 0.35  | -0.10 |             |
| -0.14 | 3.27  | 2.90  | -0.73 | 5.57  | 0.23  | -0.06 |             |
| 0.12  | 12.28 | 6.11  | 1.54  | 6.22  | 0.42  | 0.12  |             |
| 0.46  | 5.89  | 0.28  | -0.07 | 3.19  | 2.61  | -0.74 |             |
| 0.15  | 5.85  | 0.32  | -0.08 | 6.60  | 0.80  | 0.23  |             |
| 1.71  | 8.35  | 2.18  | 0.55  | 12.31 | 6.51  | 1.85  |             |
| 0.11  | 3.81  | 2.36  | -0.59 | 4.04  | 1.76  | -0.50 |             |
| 1.42  | 4.95  | 1.22  | -0.31 | 4.39  | 1.41  | -0.40 |             |
| 3.09  | 7.52  | 1.35  | 0.34  | 4.54  | 1.26  | -0.36 |             |
| 1.89  | 10.72 | 4.55  | 1.15  | 5.01  | 0.79  | -0.22 |             |
| -0.70 | 1.47  | 4.70  | -1.19 | 2.22  | 3.58  | -1.02 |             |
| 2.78  | 11.29 | 5.12  | 1.29  | 8.54  | 2.74  | 0.78  |             |
| 0.21  | 4.61  | 1.56  | -0.39 | 2.72  | 3.08  | -0.88 |             |
| 2.46  | 3.91  | 2.26  | -0.57 | 6.08  | 0.28  | 0.08  |             |
| 1.42  | 4.93  | 1.24  | -0.31 | 6.49  | 0.69  | 0.20  |             |
| 6.28  | 14.41 | 8.24  | 2.08  | 9.10  | 3.30  | 0.94  | toxic a,b   |
| 4.20  | 3.19  | 2.98  | -0.75 | 13.34 | 7.54  | 2.15  | art a,b     |
| -0.63 | 4.56  | 1.61  | -0.41 | 4.16  | 1.64  | -0.47 |             |
| 1.45  | 23.04 | 16.87 | 4.26  | 19.76 | 13.96 | 3.97  | toxic a,b,c |
| -1.17 | 7.66  | 1.49  | 0.38  | 4.96  | 0.84  | -0.24 |             |
| -0.57 | 11.90 | 5.73  | 1.44  | 4.52  | 1.28  | -0.36 |             |
| -0.98 | 7.19  | 1.02  | 0.26  | 5.39  | 0.41  | -0.12 |             |
| 1.72  | 5.76  | 0.41  | -0.10 | 6.37  | 0.57  | 0.16  |             |
| -0.62 | 5.83  | 0.34  | -0.09 | 5.24  | 0.56  | -0.16 |             |
| 2.01  | 16.64 | 10.47 | 2.64  | 9.94  | 4.14  | 1.18  |             |
| 0.48  | 4.14  | 2.03  | -0.51 | 4.16  | 1.64  | -0.47 |             |
| -0.57 | 5.11  | 1.06  | -0.27 | 5.95  | 0.15  | 0.04  |             |
| -0.98 | 11.33 | 5.16  | 1.30  | 6.35  | 0.55  | 0.16  |             |
| -0.16 | 6.50  | 0.33  | 0.08  | 3.50  | 2.30  | -0.65 |             |
| 0.25  | 4.65  | 1.52  | -0.38 | 3.69  | 2.11  | -0.60 |             |
| 0.47  | 6.71  | 0.54  | 0.14  | 2.06  | 3.74  | -1.06 |             |
| -0.78 | 8.70  | 2.53  | 0.64  | 4.44  | 1.36  | -0.39 |             |
| -0.23 | 14.42 | 8.25  | 2.08  | 4.20  | 1.60  | -0.45 |             |
| 0.78  | 3.17  | 3.00  | -0.76 | 2.25  | 3.55  | -1.01 |             |
| 0.39  | 10.70 | 4.53  | 1.14  | 2.55  | 3.25  | -0.92 |             |
| -0.37 | 7.32  | 1.15  | 0.29  | 2.49  | 3.31  | -0.94 |             |
| -0.75 | 10.92 | 4.75  | 1.20  | 5.85  | 0.05  | 0.02  |             |
| -0.71 | 3.54  | 2.63  | -0.66 | 2.77  | 3.03  | -0.86 |             |
| 2.85  | 11.77 | 5.60  | 1.41  | 15.33 | 9.53  | 2.71  | toxic a,b,c |
| -0.12 | 1.35  | 4.82  | -1.22 | 5.77  | 0.03  | -0.01 |             |
| 0.21  | 12.90 | 6.73  | 1.70  | 13.06 | 7.26  | 2.07  |             |
| -0.81 | 7.29  | 1.12  | 0.28  | 7.91  | 2.11  | 0.60  |             |
| -0.71 | 5.87  | 0.30  | -0.08 | 1.99  | 3.81  | -1.08 |             |
| -0.62 | 4.96  | 1.21  | -0.31 | 13.72 | 7.92  | 2.25  |             |

|       |       |       |       |       |       |       |               |
|-------|-------|-------|-------|-------|-------|-------|---------------|
| -0.46 | 5.94  | 0.23  | -0.06 | 7.80  | 2.00  | 0.57  |               |
| 2.09  | 15.66 | 9.49  | 2.39  | 19.62 | 13.82 | 3.93  | x toxic a,b,c |
| -0.55 | 0.24  | 5.93  | -1.50 | 8.46  | 2.66  | 0.76  |               |
| -0.24 | 0.86  | 5.31  | -1.34 | 15.18 | 9.38  | 2.67  |               |
| -0.68 | 12.65 | 6.48  | 1.64  | 3.68  | 2.12  | -0.60 |               |
| -0.22 | 7.00  | 0.83  | 0.21  | 7.81  | 2.01  | 0.57  |               |
| 0.79  | 1.87  | 4.30  | -1.08 | 3.82  | 1.98  | -0.56 |               |
| -0.66 | 1.80  | 4.37  | -1.10 | 14.83 | 9.03  | 2.57  |               |
| 0.15  | 15.72 | 9.55  | 2.41  | 11.79 | 5.99  | 1.71  |               |
| 2.51  | 19.70 | 13.53 | 3.41  | 14.07 | 8.27  | 2.36  | x toxic a,b,c |
| -0.06 | 9.36  | 3.19  | 0.81  | 6.47  | 0.67  | 0.19  |               |
| 0.06  | 0.44  | 5.73  | -1.45 | 6.09  | 0.29  | 0.08  |               |
| -0.29 | 5.99  | 0.18  | -0.05 | 8.60  | 2.80  | 0.80  |               |
|       | 6.17  | 2.68  |       | 5.80  | 2.37  |       |               |
|       |       | 8.04  |       |       | 7.12  |       |               |
|       |       | 3.96  |       |       | 3.51  |       |               |
| 21.77 |       | 35.73 |       |       |       |       |               |
| 21.20 |       | 30.22 |       |       |       |       |               |
| 23.28 |       | 37.68 |       |       |       |       |               |
| 17.56 |       | 21.54 |       |       |       |       |               |
| 20.95 |       | 31.30 |       |       |       |       |               |
| 2.42  |       | 7.23  |       |       |       |       |               |
|       |       | 7.94  |       |       |       |       |               |
| 5.08  |       | 4.88  |       |       |       |       |               |
| 6.96  |       | 1.93  |       |       |       |       |               |
| 8.52  |       | 4.71  |       |       |       |       |               |
| 6.85  |       | 4.87  |       |       |       |       |               |
| 1.72  |       | 2.45  |       |       |       |       |               |
| 7.27  |       | 21.68 |       |       |       |       |               |
| 5.17  |       | 5.00  |       |       |       |       |               |
| 12.45 |       | 26.69 |       |       |       |       |               |
| 14.10 |       | 26.43 |       |       |       |       |               |
| 0.88  |       | 1.01  |       |       |       |       |               |
| 0.12  |       | -0.01 |       |       |       |       |               |

|       |       |
|-------|-------|
| 26.85 | 9.59  |
| 46.04 | 33.20 |
| 8.77  | 7.44  |
| 7.14  | 4.97  |

12.15  
10.31

11.98  
14.86

|              |                                            |                    |         | <b>% inf</b> |
|--------------|--------------------------------------------|--------------------|---------|--------------|
| 50018.00 A02 | M-003429- nuclear receptor subfamily 5, g  | 2516.00 NR5A1      | 1717.00 |              |
| 50018.00 A04 | M-003428- nuclear receptor subfamily 4, g  | 8013.00 NR4A3      | 2091.00 |              |
| 50018.00 A05 | M-010527- nephroblastoma overexpresser     | 4856.00 NOV        | 1558.00 |              |
| 50018.00 A06 | M-003427- nuclear receptor subfamily 4, g  | 4929.00 NR4A2      | 1469.00 |              |
| 50018.00 A07 | M-012729- natriuretic peptide precursor A  | 4878.00 NPPA       | 884.00  |              |
| 50018.00 A08 | M-003426- nuclear receptor subfamily 4, g  | 3164.00 NR4A1      | 715.00  |              |
| 50018.00 A09 | M-008100- tumor necrosis factor receptor   | 7293.00 TNFRSF4    | 1146.00 |              |
| 50018.00 A10 | M-003425- nuclear receptor subfamily 3, g  | 4306.00 NR3C2      | 1516.00 |              |
| 50018.00 A11 | M-011524- tumor necrosis factor (ligand) s | 8743.00 TNFSF10    | 463.00  |              |
| 50018.00 A12 | M-003424- nuclear receptor subfamily 3, g  | 2908.00 NR3C1      | 513.00  |              |
| 50018.00 A13 | M-011499- tumor necrosis factor (ligand) s | 8600.00 TNFSF11    | 762.00  |              |
| 50018.00 A14 | M-003423- nuclear receptor subfamily 2, g  | 2063.00 NR2F6      | 754.00  |              |
| 50018.00 A15 | M-010629- tumor necrosis factor (ligand) s | 8742.00 TNFSF12    | 1342.00 |              |
| 50018.00 A16 | M-003422- nuclear receptor subfamily 2, g  | 7026.00 NR2F2      | 800.00  |              |
| 50018.00 A17 | M-011523- tumor necrosis factor (ligand) s | 8741.00 TNFSF13    | 686.00  |              |
| 50018.00 A18 | M-003421- nuclear receptor subfamily 2, g  | 7025.00 NR2F1      | 1896.00 |              |
| 50018.00 A19 | M-017586- tumor necrosis factor (ligand) s | 10673.00 TNFSF13B  | 803.00  |              |
| 50018.00 A20 | M-003420- nuclear receptor subfamily 2, g  | 10002.00 NR2E3     | 661.00  |              |
| 50018.00 A21 | M-017588- tumor necrosis factor (ligand) s | 9966.00 TNFSF15    | 1567.00 |              |
| 50018.00 A23 | M-011981- tumor necrosis factor (ligand) s | 8995.00 TNFSF18    | 1025.00 |              |
| 50018.00 B02 | M-011849- extracellular matrix protein 1   | 1893.00 ECM1       | 1057.00 |              |
| 50018.00 B04 | M-019800- desmoplakin                      | 1832.00 DSP        | 1627.00 |              |
| 50018.00 B05 | M-003430- nuclear receptor subfamily 5, g  | 2494.00 NR5A2      | 2427.00 |              |
| 50018.00 B06 | M-012365- dynactin 3 (p22)                 | 11258.00 DCTN3     | 1861.00 |              |
| 50018.00 B07 | M-003431- nuclear receptor subfamily 6, g  | 2649.00 NR6A1      | 893.00  |              |
| 50018.00 B08 | M-004416- death associated protein 3       | 7818.00 DAP3       | 999.00  |              |
| 50018.00 B09 | M-003778- paired box gene 8                | 7849.00 PAX8       | 836.00  |              |
| 50018.00 B10 | M-010551- coiled-coil domain containing 6  | 8030.00 CCDC6      | 538.00  |              |
| 50018.00 B11 | M-008556- peroxisome proliferator-activa   | 133522.00 PPARGC1B | 1632.00 |              |
| 50018.00 B12 | M-013142- crystallin, gamma C              | 1420.00 CRYGC      | 1456.00 |              |
| 50018.00 B13 | M-003433- progesterone receptor            | 5241.00 PGR        | 1140.00 |              |
| 50018.00 B14 | M-012025- crystallin, gamma B              | 1419.00 CRYGB      | 2909.00 |              |
| 50018.00 B15 | M-019593- pleiotropic regulator 1 (PRL1 h  | 5356.00 PLRG1      | 1458.00 |              |
| 50018.00 B16 | M-006480- crystallin, beta B3              | 1417.00 CRYBB3     | 1295.00 |              |
| 50018.00 B17 | M-003434- peroxisome proliferator-activa   | 5465.00 PPARA      | 1851.00 |              |
| 50018.00 B18 | M-012024- crystallin, beta A2              | 1412.00 CRYBA2     | 600.00  |              |
| 50018.00 B19 | M-004126- PPAR binding protein             | 5469.00 PPARBP     | 1432.00 |              |
| 50018.00 B20 | M-013067- crystallin, beta A1              | 1411.00 CRYBA1     | 1912.00 |              |
| 50018.00 B21 | M-003435- peroxisome proliferator-activa   | 5467.00 PPARD      | 1007.00 |              |
| 50018.00 B23 | M-003436- peroxisome proliferator-activa   | 5468.00 PPARG      | 1987.00 |              |
| 50018.00 C02 | M-003419- nuclear receptor subfamily 2, g  | 7101.00 NR2E1      | 3156.00 |              |
| 50018.00 C04 | M-003418- nuclear receptor subfamily 2, g  | 7182.00 NR2C2      | 1911.00 |              |
| 50018.00 C05 | M-011416- tumor necrosis factor (ligand) s | 7292.00 TNFSF4     | 2362.00 |              |
| 50018.00 C06 | M-003417- nuclear receptor subfamily 2, g  | 7181.00 NR2C1      | 1089.00 |              |
| 50018.00 C07 | M-011006- CD40 ligand (TNF superfamily,    | 959.00 CD40LG      | 3395.00 |              |
| 50018.00 C08 | M-003416- nuclear receptor subfamily 1, g  | 9970.00 NR1I3      | 1158.00 |              |



|              |                                             |                  |         |
|--------------|---------------------------------------------|------------------|---------|
| 50018.00 C09 | M-011130- Fas ligand (TNF superfamily, m    | 356.00 FASLG     | 1783.00 |
| 50018.00 C10 | M-003415- nuclear receptor subfamily 1, g   | 8856.00 NR1I2    | 1850.00 |
| 50018.00 C11 | M-009952- CD70 molecule                     | 970.00 CD70      | 1663.00 |
| 50018.00 C12 | M-003414- nuclear receptor subfamily 1, g   | 9971.00 NR1H4    | 1290.00 |
| 50018.00 C13 | M-011231- tumor necrosis factor (ligand) s  | 944.00 TNFSF8    | 1805.00 |
| 50018.00 C14 | M-003413- nuclear receptor subfamily 1, g   | 10062.00 NR1H3   | 1878.00 |
| 50018.00 C15 | M-011525- tumor necrosis factor (ligand) s  | 8744.00 TNFSF9   | 1820.00 |
| 50018.00 C16 | M-003412- nuclear receptor subfamily 1, g   | 7376.00 NR1H2    | 680.00  |
| 50018.00 C17 | M-010560- transducer of ERBB2, 1            | 10140.00 TOB1    | 1745.00 |
| 50018.00 C18 | M-003432- nuclear receptor subfamily 1, g   | 9975.00 NR1D2    | 1615.00 |
| 50018.00 C19 | M-016930- toll interacting protein          | 54472.00 TOLLIP  | 720.00  |
| 50018.00 C20 | M-003411- nuclear receptor subfamily 1, g   | 9572.00 NR1D1    | 1656.00 |
| 50018.00 C21 | M-009840- tumor protein p53 inducible pr    | 9540.00 TP53I3   | 1994.00 |
| 50018.00 C23 | M-010104- TNF receptor-associated protei    | 10131.00 TRAP1   | 3040.00 |
| 50018.00 D02 | M-009743- crystallin, alpha B               | 1410.00 CRYAB    | 1659.00 |
| 50018.00 D04 | M-013473- crystallin, alpha A               | 1409.00 CRYAA    | 2799.00 |
| 50018.00 D05 | M-003437- retinoic acid receptor, alpha     | 5914.00 RARA     | 846.00  |
| 50018.00 D06 | M-011624- collagen, type IX, alpha 3        | 1299.00 COL9A3   | 455.00  |
| 50018.00 D07 | M-003438- retinoic acid receptor, beta      | 5915.00 RARB     | 1198.00 |
| 50018.00 D08 | M-011623- collagen, type IX, alpha 2        | 1298.00 COL9A2   | 703.00  |
| 50018.00 D09 | M-003439- retinoic acid receptor, gamma     | 5916.00 RARG     | 1079.00 |
| 50018.00 D10 | M-011622- collagen, type IX, alpha 1        | 1297.00 COL9A1   | 547.00  |
| 50018.00 D11 | M-004768- v-rel reticuloendotheliosis viral | 5966.00 REL      | 441.00  |
| 50018.00 D12 | M-013060- collagen, type V, alpha 3         | 50509.00 COL5A3  | 793.00  |
| 50018.00 D13 | M-003533- v-rel reticuloendotheliosis viral | 5970.00 RELA     | 2193.00 |
| 50018.00 D14 | M-011016- collagen, type V, alpha 2         | 1290.00 COL5A2   | 2096.00 |
| 50018.00 D15 | M-003440- RAR-related orphan receptor A     | 6095.00 RORA     | 737.00  |
| 50018.00 D16 | M-011014- collagen, type IV, alpha 5 (Alpo  | 1287.00 COL4A5   | 1192.00 |
| 50018.00 D17 | M-003441- RAR-related orphan receptor B     | 6096.00 RORB     | 1007.00 |
| 50018.00 D18 | M-021363- collagen, type IV, alpha 4        | 1286.00 COL4A4   | 1566.00 |
| 50018.00 D19 | M-003442- RAR-related orphan receptor C     | 6097.00 RORC     | 1964.00 |
| 50018.00 D20 | M-003645- collagen, type IV, alpha 2        | 1284.00 COL4A2   | 2075.00 |
| 50018.00 D21 | M-003443- retinoid X receptor, alpha        | 6256.00 RXRA     | 1420.00 |
| 50018.00 D23 | M-003444- retinoid X receptor, beta         | 6257.00 RXRB     | 2956.00 |
| 50018.00 E02 | M-003410- nuclear receptor subfamily 0, g   | 8431.00 NR0B2    | 2678.00 |
| 50018.00 E04 | M-003409- nuclear receptor subfamily 0, g   | 190.00 NR0B1     | 2772.00 |
| 50018.00 E05 | M-019629- thyrotropin-releasing hormone     | 7200.00 TRH      | 1725.00 |
| 50018.00 E06 | M-010317- neuronal PAS domain protein 1     | 4861.00 NPAS1    | 3936.00 |
| 50018.00 E07 | M-012605- thyroid hormone receptor inte     | 7205.00 TRIP6    | 2506.00 |
| 50018.00 E08 | M-011883- Notch homolog 4 (Drosophila)      | 4855.00 NOTCH4   | 1600.00 |
| 50018.00 E09 | M-012686- jumonji domain containing 1C      | 221037.00 JMJD1C | 3475.00 |
| 50018.00 E10 | M-011093- Notch homolog 3 (Drosophila)      | 4854.00 NOTCH3   | 1197.00 |
| 50018.00 E11 | M-011418- urocortin                         | 7349.00 UCN      | 1906.00 |
| 50018.00 E12 | M-012235- Notch homolog 2 (Drosophila)      | 4853.00 NOTCH2   | 1926.00 |
| 50018.00 E13 | M-003550- vascular endothelial growth fac   | 7422.00 VEGFA    | 1720.00 |
| 50018.00 E14 | M-007771- Notch homolog 1, translocatio     | 4851.00 NOTCH1   | 2763.00 |
| 50018.00 E15 | M-015731- vascular endothelial growth fac   | 7423.00 VEGFB    | 1430.00 |

|                     |                                                 |                 |                |                |
|---------------------|-------------------------------------------------|-----------------|----------------|----------------|
| 50018.00 E16        | M-015757- nuclear factor of kappa light pc      | 4793.00         | NFKBIB         | 1276.00        |
| 50018.00 E17        | M-012071- vascular endothelial growth fac       | 7424.00         | VEGFC          | 3333.00        |
| 50018.00 E18        | M-019107- nuclear receptor coactivator 6        | 23054.00        | NCOA6          | 4046.00        |
| 50018.00 E19        | M-012861- VGF nerve growth factor induc         | 7425.00         | VGF            | 3155.00        |
| <b>50018.00 E20</b> | <b>M-020159- nuclear receptor coactivator 2</b> | <b>10499.00</b> | <b>NCOA2</b>   | <b>2985.00</b> |
| 50018.00 E21        | M-011542- WNT1 inducible signaling pathv        | 8838.00         | WISP3          | 1232.00        |
| 50018.00 E23        | M-008543- wingless-type MMTV integratic         | 7476.00         | WNT7A          | 4761.00        |
| 50018.00 F02        | M-011618- collagen, type IV, alpha 1            | 1282.00         | COL4A1         | 2059.00        |
| 50018.00 F04        | M-011012- collagen, type III, alpha 1 (Ehle     | 1281.00         | COL3A1         | 1721.00        |
| 50018.00 F05        | M-003445- retinoid X receptor, gamma            | 6258.00         | RXRG           | 3234.00        |
| 50018.00 F06        | M-004758- collagen, type I, alpha 2             | 1278.00         | COL1A2         | 1845.00        |
| 50018.00 F07        | M-011884- neurturin                             | 4902.00         | NRTN           | 2702.00        |
| 50018.00 F08        | M-010502- collagen, type I, alpha 1             | 1277.00         | COL1A1         | 2068.00        |
| 50018.00 F09        | M-019676- natriuretic peptide precursor B       | 4879.00         | NPPB           | 1647.00        |
| 50018.00 F10        | M-011010- collagen, type XVII, alpha 1          | 1308.00         | COL17A1        | 1107.00        |
| 50018.00 F11        | M-014648- nuclear receptor binding factor       | 29982.00        | NRBF2          | 1710.00        |
| 50018.00 F12        | M-011616- collagen, type XVI, alpha 1           | 1307.00         | COL16A1        | 1965.00        |
| 50018.00 F13        | M-013405- neurotrophin 3                        | 4908.00         | NTF3           | 740.00         |
| <b>50018.00 F14</b> | <b>M-011834- collagen, type XII, alpha 1</b>    | <b>1303.00</b>  | <b>COL12A1</b> | <b>3891.00</b> |
| 50018.00 F15        | M-012236- neurotrophin 5 (neurotrophin 4        | 4909.00         | NTF5           | 1829.00        |
| 50018.00 F16        | M-013352- collagen, type XI, alpha 2            | 1302.00         | COL11A2        | 930.00         |
| 50018.00 F17        | M-010170- neurotensin                           | 4922.00         | NTS            | 1943.00        |
| 50018.00 F18        | M-011009- collagen, type X, alpha 1(Schmi       | 1300.00         | COL10A1        | 1100.00        |
| 50018.00 F19        | M-019185- opioid growth factor receptor         | 11054.00        | OGFR           | 1622.00        |
| 50018.00 F20        | M-011409- claudin 5 (transmembrane proi         | 7122.00         | CLDN5          | 1805.00        |
| 50018.00 F21        | M-003804- oxidized low density lipoprotei       | 4973.00         | OLR1           | 2672.00        |
| 50018.00 F23        | M-011743- opioid binding protein/cell adh       | 4978.00         | OPCML          | 2935.00        |
| 50018.00 G02        | M-005196- nuclear receptor coactivator 1        | 8648.00         | NCOA1          | 4588.00        |
| <b>50018.00 G04</b> | <b>M-021258- centrosomal protein 170kDa</b>     | <b>9859.00</b>  | <b>CEP170</b>  | <b>3286.00</b> |
| 50018.00 G05        | M-007889- chemokine (C motif) ligand 1          | 6375.00         | XCL1           | 2230.00        |
| 50018.00 G06        | M-003407- hepatocyte nuclear factor 4, ga       | 3174.00         | HNF4G          | 2390.00        |
| 50018.00 G07        | M-007898- chemokine (C motif) ligand 2          | 6846.00         | XCL2           | 2508.00        |
| 50018.00 G08        | M-004597- high mobility group AT-hook 1         | 3159.00         | HMGA1          | 1761.00        |
| 50018.00 G09        | M-008044- ectodysplasin A2 receptor             | 60401.00        | EDA2R          | 2103.00        |
| 50018.00 G10        | M-010068- hypoxia inducible factor 3, alpl      | 64344.00        | HIF3A          | 933.00         |
| 50018.00 G11        | M-017571- zona pellucida glycoprotein 3 (       | 7784.00         | ZP3            | 3191.00        |
| 50018.00 G12        | M-004018- hypoxia-inducible factor 1, alpl      | 3091.00         | HIF1A          | 1697.00        |
| 50018.00 G13        | M-013212- chemokine (C-X-C motif) recep         | 57007.00        | CXCR7          | 1027.00        |
| 50018.00 G14        | M-003405- estrogen-related receptor gam         | 2104.00         | ESRRG          | 1296.00        |
| 50018.00 G15        | M-007316- ATP-binding cassette, sub-fami        | 10060.00        | ABCC9          | 2020.00        |
| 50018.00 G16        | M-003404- estrogen-related receptor beta        | 2103.00         | ESRRB          | 1790.00        |
| 50018.00 G17        | M-014141- trafficking protein, kinesin binc     | 66008.00        | TRAK2          | 1778.00        |
| 50018.00 G18        | M-003403- estrogen-related receptor alph        | 2101.00         | ESRRA          | 1242.00        |
| 50018.00 G19        | M-013434- apolipoprotein L, 3                   | 80833.00        | APOL3          | 1323.00        |
| 50018.00 G20        | M-003402- estrogen receptor 2 (ER beta)         | 2100.00         | ESR2           | 3510.00        |
| 50018.00 G21        | M-015338- cyclic AMP phosphoprotein, 19         | 10776.00        | ARPP-19        | 1335.00        |
| 50018.00 G23        | M-006134- cholinergic receptor, nicotinic,      | 1134.00         | CHRNA1         | 2056.00        |

|              |                                            |                  |         |
|--------------|--------------------------------------------|------------------|---------|
| 50018.00 H02 | M-020781- claudin 2                        | 9075.00 CLDN2    | 1367.00 |
| 50018.00 H04 | M-017304- claudin 14                       | 23562.00 CLDN14  | 2045.00 |
| 50018.00 H05 | M-010528- oncostatin M                     | 5008.00 OSM      | 3342.00 |
| 50018.00 H06 | M-021307- claudin 12                       | 9069.00 CLDN12   | 1083.00 |
| 50018.00 H07 | M-011748- platelet-derived growth factor   | 5154.00 PDGFA    | 2850.00 |
| 50018.00 H08 | M-019258- claudin 11 (oligodendrocyte tra  | 5010.00 CLDN11   | 2419.00 |
| 50018.00 H09 | M-011749- platelet-derived growth factor   | 5155.00 PDGFB    | 1089.00 |
| 50018.00 H10 | M-019255- claudin 10                       | 9071.00 CLDN10   | 1942.00 |
| 50018.00 H11 | M-020123- proenkephalin                    | 5179.00 PENK     | 566.00  |
| 50018.00 H12 | M-017369- claudin 1                        | 9076.00 CLDN1    | 2257.00 |
| 50018.00 H13 | M-008058- platelet factor 4 (chemokine (C  | 5196.00 PF4      | 1459.00 |
| 50018.00 H14 | M-003467- caveolin 1, caveolae protein, 2: | 857.00 CAV1      | 2294.00 |
| 50018.00 H15 | M-016246- placental growth factor, vascul  | 5228.00 PGF      | 2355.00 |
| 50018.00 H16 | M-021493- biglycan                         | 633.00 BGN       | 2302.00 |
| 50018.00 H17 | M-010639- progesterone receptor membr.     | 10424.00 PGRMC2  | 2346.00 |
| 50018.00 H18 | M-005284- actin related protein 2/3 comp   | 10094.00 ARPC3   | 1748.00 |
| 50018.00 H19 | M-019291- pleckstrin homology domain in    | 55023.00 PHIP    | 2514.00 |
| 50018.00 H20 | M-012081- actin related protein 2/3 comp   | 10109.00 ARPC2   | 1050.00 |
| 50018.00 H21 | M-019590- plexin B1                        | 5364.00 PLXNB1   | 2784.00 |
| 50018.00 H23 | M-007753- plexin C1                        | 10154.00 PLXNC1  | 1921.00 |
| 50018.00 I02 | M-003886- v-ets erythroblastosis virus E26 | 2078.00 ERG      | 3963.00 |
| 50018.00 I04 | M-004814- endothelial PAS domain protei    | 2034.00 EPAS1    | 3017.00 |
| 50018.00 I05 | M-006135- cholinergic receptor, nicotinic, | 57053.00 CHRNA10 | 307.00  |
| 50018.00 I06 | M-017313- cofactor required for Sp1 trans  | 9443.00 CRSP9    | 1527.00 |
| 50018.00 I07 | M-006136- cholinergic receptor, nicotinic, | 1135.00 CHRNA2   | 2134.00 |
| 50018.00 I08 | M-011948- cofactor required for Sp1 trans  | 9441.00 CRSP7    | 2078.00 |
| 50018.00 I09 | M-006137- cholinergic receptor, nicotinic, | 1136.00 CHRNA3   | 2412.00 |
| 50018.00 I10 | M-006312- cofactor required for Sp1 trans  | 9440.00 CRSP6    | 2223.00 |
| 50018.00 I11 | M-006138- cholinergic receptor, nicotinic, | 1137.00 CHRNA4   | 2120.00 |
| 50018.00 I12 | M-011928- cofactor required for Sp1 trans  | 9282.00 CRSP2    | 1285.00 |
| 50018.00 I13 | M-006139- cholinergic receptor, nicotinic, | 1138.00 CHRNA5   | 1869.00 |
| 50018.00 I14 | M-007862- interleukin 31 receptor A        | 133396.00 IL31RA | 1766.00 |
| 50018.00 I15 | M-006140- cholinergic receptor, nicotinic, | 8973.00 CHRNA6   | 1833.00 |
| 50018.00 I16 | M-012897- CCR4-NOT transcription compl     | 29883.00 CNOT7   | 2212.00 |
| 50018.00 I17 | M-004143- cholinergic receptor, nicotinic, | 1139.00 CHRNA7   | 2007.00 |
| 50018.00 I18 | M-008212- clock homolog (mouse)            | 9575.00 CLOCK    | 2765.00 |
| 50018.00 I19 | M-006141- cholinergic receptor, nicotinic, | 55584.00 CHRNA9  | 2724.00 |
| 50018.00 I20 | M-007852- CD86 molecule                    | 942.00 CD86      | 3314.00 |
| 50018.00 I21 | M-006142- cholinergic receptor, nicotinic, | 1140.00 CHRNB1   | 3333.00 |
| 50018.00 I23 | M-006143- cholinergic receptor, nicotinic, | 1141.00 CHRNB2   | 2669.00 |
| 50018.00 J02 | M-012082- actin related protein 2/3 comp   | 10095.00 ARPC1B  | 3290.00 |
| 50018.00 J04 | M-011207- ankyrin 3, node of Ranvier (ank  | 288.00 ANK3      | 2553.00 |
| 50018.00 J05 | M-019685- pro-melanin-concentrating hor    | 5367.00 PMCH     | 2516.00 |
| 50018.00 J06 | M-008417- ankyrin 2, neuronal              | 287.00 ANK2      | 2784.00 |
| 50018.00 J07 | M-020201- proopiomelanocortin (adrenoc     | 5443.00 POMC     | 1627.00 |
| 50018.00 J08 | M-012489- amelogenin (amelogenesis imp     | 265.00 AMELX     | 2350.00 |
| 50018.00 J09 | M-006393- prolactin                        | 5617.00 PRL      | 2320.00 |

|                     |                                             |               |             |                |
|---------------------|---------------------------------------------|---------------|-------------|----------------|
| 50018.00 J10        | M-012274- actin-like 7B                     | 10880.00      | ACTL7B      | 2015.00        |
| 50018.00 J11        | M-014883- prokineticin 1                    | 84432.00      | PROK1       | 2702.00        |
| 50018.00 J12        | M-012273- actin-like 7A                     | 10881.00      | ACTL7A      | 2057.00        |
| 50018.00 J13        | M-011887- persephin                         | 5623.00       | PSPN        | 2296.00        |
| 50018.00 J14        | M-020264- gamma tubulin ring complex pi     | 27229.00      | 76P         | 1525.00        |
| 50018.00 J15        | M-003698- parathyroid hormone-like horn     | 5744.00       | PTHLH       | 1850.00        |
| 50018.00 J16        | M-019963- mediator of RNA polymerase II     | 10001.00      | MED6        | 2194.00        |
| 50018.00 J17        | M-004300- poliovirus receptor-related 1 (f  | 5818.00       | PVRL1       | 3171.00        |
| 50018.00 J18        | M-015791- SMAD family member 5              | 4090.00       | SMAD5       | 3172.00        |
| 50018.00 J19        | M-018703- prohibitin 2                      | 11331.00      | PHB2        | 630.00         |
| 50018.00 J20        | M-019874- lipopolysaccharide-induced TN     | 9516.00       | LITAF       | 4083.00        |
| 50018.00 J21        | M-017403- relaxin 1                         | 6013.00       | RLN1        | 4284.00        |
| 50018.00 J23        | M-017400- relaxin 2                         | 6019.00       | RLN2        | 3932.00        |
| 50018.00 K02        | M-007851- CD80 molecule                     | 941.00        | CD80        | 4508.00        |
| 50018.00 K04        | M-009284- aryl hydrocarbon receptor nucl    | 56938.00      | ARNTL2      | 2958.00        |
| 50018.00 K05        | M-006144- cholinergic receptor, nicotinic,  | 1142.00       | CHRNB3      | 166.00         |
| 50018.00 K06        | M-010261- aryl hydrocarbon receptor nucl    | 406.00        | ARNTL       | 2136.00        |
| 50018.00 K07        | M-006146- cholinergic receptor, nicotinic,  | 1144.00       | CHRND       | 2941.00        |
| 50018.00 K08        | M-008920- aryl-hydrocarbon receptor nuc     | 9915.00       | ARNT2       | 2929.00        |
| 50018.00 K09        | M-006147- cholinergic receptor, nicotinic,  | 1145.00       | CHRNE       | 1594.00        |
| 50018.00 K10        | M-007207- aryl hydrocarbon receptor nucl    | 405.00        | ARNT        | 3290.00        |
| 50018.00 K11        | M-011175- cubilin (intrinsic factor-cobalan | 8029.00       | CUBN        | 2122.00        |
| 50018.00 K12        | M-003400- androgen receptor (dihydrotes     | 367.00        | AR          | 940.00         |
| 50018.00 K13        | M-006162- gamma-aminobutyric acid (GAI      | 2554.00       | GABRA1      | 2124.00        |
| 50018.00 K14        | M-006325- aryl hydrocarbon receptor inte    | 9049.00       | AIP         | 2101.00        |
| 50018.00 K15        | M-006163- gamma-aminobutyric acid (GAI      | 2555.00       | GABRA2      | 4251.00        |
| 50018.00 K16        | M-004990- aryl hydrocarbon receptor         | 196.00        | AHR         | 2781.00        |
| 50018.00 K17        | M-006164- gamma-aminobutyric acid (GAI      | 2556.00       | GABRA3      | 1310.00        |
| 50018.00 K18        | M-003401- estrogen receptor 1               | 2099.00       | ESR1        | 1100.00        |
| 50018.00 K19        | M-006165- gamma-aminobutyric acid (GAI      | 2557.00       | GABRA4      | 3211.00        |
| <b>50018.00 K20</b> | <b>M-008103- CD27 molecule</b>              | <b>939.00</b> | <b>CD27</b> | <b>2491.00</b> |
| 50018.00 K21        | M-006166- gamma-aminobutyric acid (GAI      | 2558.00       | GABRA5      | 3595.00        |
| 50018.00 K23        | M-006167- gamma-aminobutyric acid (GAI      | 2559.00       | GABRA6      | 4808.00        |
| 50018.00 L02        | M-019853- slit homolog 2 (Drosophila)       | 9353.00       | SLIT2       | 2036.00        |
| 50018.00 L04        | M-017502- scavenger receptor class F, me    | 91179.00      | SCARF2      | 1882.00        |
| 50018.00 L05        | M-013463- S100 calcium binding protein A    | 6277.00       | S100A6      | 1705.00        |
| 50018.00 L06        | M-011060- jagged 1 (Alagille syndrome)      | 182.00        | JAG1        | 2150.00        |
| 50018.00 L07        | M-011384- S100 calcium binding protein A    | 6280.00       | S100A9      | 1323.00        |
| 50018.00 L08        | M-003482- catenin (cadherin-associated pi   | 1499.00       | CTNNB1      | 826.00         |
| 50018.00 L09        | M-021415- C-type lectin domain family 11,   | 6320.00       | CLEC11A     | 2645.00        |
| 50018.00 L10        | M-011596- dystonin                          | 667.00        | DST         | 2657.00        |
| 50018.00 L11        | M-011924- small inducible cytokine subfar   | 9255.00       | SCYE1       | 1272.00        |
| 50018.00 L12        | M-007895- erythropoietin receptor           | 2057.00       | EPOR        | 1121.00        |
| 50018.00 L13        | M-011774- selectin P ligand                 | 6404.00       | SELPLG      | 1900.00        |
| 50018.00 L14        | M-006450- epithelial cell transforming seq  | 1894.00       | ECT2        | 1305.00        |
| 50018.00 L15        | M-019583- signaling lymphocytic activatio   | 6504.00       | SLAMF1      | 2958.00        |

|          |     |                                            |           |         |         |
|----------|-----|--------------------------------------------|-----------|---------|---------|
| 50018.00 | L16 | M-009421- Rho guanine nucleotide exchar    | 9138.00   | ARHGEF1 | 2740.00 |
| 50018.00 | L17 | M-017604- suppressor of cytokine signalin  | 8835.00   | SOCS2   | 2115.00 |
| 50018.00 | L18 | M-009304- Rho GTPase activating protein    | 395.00    | ARHGAP6 | 1300.00 |
| 50018.00 | L19 | M-027326- sialophorin (leukosialin, CD43)  | 6693.00   | SPN     | 2190.00 |
| 50018.00 | L20 | M-003628- Rho GTPase activating protein    | 393.00    | ARHGAP4 | 3817.00 |
| 50018.00 | L21 | M-016717- signal recognition particle rece | 6734.00   | SRPR    | 2705.00 |
| 50018.00 | L23 | M-010233- low density lipoprotein-related  | 29967.00  | LRP12   | 2839.00 |
| 50018.00 | M02 | M-003721- very low density lipoprotein re  | 7436.00   | VLDLR   | 3108.00 |
| 50018.00 | M04 | M-003607- transient receptor potential ca  | 55503.00  | TRPV6   | 1864.00 |
| 50018.00 | M05 | M-006168- gamma-aminobutyric acid (GAI     | 2560.00   | GABRB1  | 2033.00 |
| 50018.00 | M06 | M-004196- transient receptor potential ca  | 56302.00  | TRPV5   | 2175.00 |
| 50018.00 | M07 | M-006169- gamma-aminobutyric acid (GAI     | 2561.00   | GABRB2  | 2128.00 |
| 50018.00 | M08 | M-006902- zinc finger, HIT type 3          | 9326.00   | ZNHIT3  | 1447.00 |
| 50018.00 | M09 | M-006170- gamma-aminobutyric acid (GAI     | 2562.00   | GABRB3  | 2927.00 |
| 50018.00 | M10 | M-012934- sortilin-related VPS10 domain c  | 22986.00  | SORCS3  | 2726.00 |
| 50018.00 | M11 | M-006171- gamma-aminobutyric acid (GAI     | 2563.00   | GABRD   | 2211.00 |
| 50018.00 | M12 | M-013162- sortilin-related VPS10 domain c  | 57537.00  | SORCS2  | 1247.00 |
| 50018.00 | M13 | M-006172- gamma-aminobutyric acid (GAI     | 2564.00   | GABRE   | 1844.00 |
| 50018.00 | M14 | M-013422- sortilin-related VPS10 domain c  | 114815.00 | SORCS1  | 2683.00 |
| 50018.00 | M15 | M-006173- gamma-aminobutyric acid (GAI     | 2565.00   | GABRG1  | 3509.00 |
| 50018.00 | M16 | M-006294- ryanodine receptor 3             | 6263.00   | RYR3    | 2220.00 |
| 50018.00 | M17 | M-006174- gamma-aminobutyric acid (GAI     | 2566.00   | GABRG2  | 2409.00 |
| 50018.00 | M18 | M-006293- ryanodine receptor 2 (cardiac)   | 6262.00   | RYR2    | 3829.00 |
| 50018.00 | M19 | M-006175- gamma-aminobutyric acid (GAI     | 2567.00   | GABRG3  | 3445.00 |
| 50018.00 | M20 | M-015788- peroxisomal biogenesis factor !  | 5830.00   | PEX5    | 3388.00 |
| 50018.00 | M21 | M-006176- gamma-aminobutyric acid (GAI     | 2568.00   | GABRP   | 3957.00 |
| 50018.00 | M23 | M-006177- gamma-aminobutyric acid (GAI     | 55879.00  | GABRQ   | 3360.00 |
| 50018.00 | N02 | M-020687- mediator of RNA polymerase II    | 29079.00  | MED4    | 2286.00 |
| 50018.00 | N04 | M-003448- vitamin D (1,25- dihydroxyvitar  | 7421.00   | VDR     | 2868.00 |
| 50018.00 | N05 | M-011788- tachykinin, precursor 1 (substa  | 6863.00   | TAC1    | 3532.00 |
| 50018.00 | N06 | M-017578- TRAF and TNF receptor associa    | 51567.00  | TTRAP   | 1736.00 |
| 50018.00 | N07 | M-008764- tachykinin 3 (neuromedin K, ne   | 6866.00   | TAC3    | 1212.00 |
| 50018.00 | N08 | M-009632- thyroid hormone receptor inte    | 9325.00   | TRIP4   | 1264.00 |
| 50018.00 | N09 | M-004832- teratocarcinoma-derived grow     | 6997.00   | TDGF1   | 3644.00 |
| 50018.00 | N10 | M-016262- thyroid hormone receptor inte    | 9319.00   | TRIP13  | 1355.00 |
| 50018.00 | N11 | M-009299- thyroglobulin                    | 7038.00   | TG      | 2490.00 |
| 50018.00 | N12 | M-003736- thyroid hormone receptor assc    | 10025.00  | THRAP5  | 1159.00 |
| 50018.00 | N13 | M-012562- transforming growth factor, be   | 7040.00   | TGFB1   | 1883.00 |
| 50018.00 | N14 | M-019908- thyroid hormone receptor assc    | 9969.00   | THRAP1  | 1856.00 |
| 50018.00 | N15 | M-019740- transforming growth factor, be   | 7043.00   | TGFB3   | 932.00  |
| 50018.00 | N16 | M-019907- thyroid hormone receptor assc    | 9967.00   | THRAP3  | 1966.00 |
| 50018.00 | N17 | M-019370- transforming growth factor, be   | 7045.00   | TGFBI   | 2961.00 |
| 50018.00 | N18 | M-009092- mediator of RNA polymerase II    | 9968.00   | MED12   | 1312.00 |
| 50018.00 | N19 | M-010545- transforming growth factor, be   | 7049.00   | TGFBR3  | 2268.00 |
| 50018.00 | N20 | M-003447- thyroid hormone receptor, bet    | 7068.00   | THRB    | 951.00  |
| 50018.00 | N21 | M-012551- thrombomodulin                   | 7056.00   | THBD    | 2413.00 |
| 50018.00 | N23 | M-005120- toll-like receptor 2             | 7097.00   | TLR2    | 1624.00 |

|                     |                                                  |                       |                |
|---------------------|--------------------------------------------------|-----------------------|----------------|
| 50018.00 O02        | M-012544- peroxisomal biogenesis factor          | 5191.00 PEX7          | 2136.00        |
| 50018.00 O04        | M-003728- purinergic receptor P2X, ligand        | 5027.00 P2RX7         | 1550.00        |
| 50018.00 O05        | M-006178- gamma-aminobutyric acid (GAI           | 2569.00 GABRR1        | 763.00         |
| 50018.00 O06        | M-006285- purinergic receptor P2X, ligand        | 5025.00 P2RX4         | 2013.00        |
| 50018.00 O07        | M-006179- gamma-aminobutyric acid (GAI           | 2570.00 GABRR2        | 1797.00        |
| 50018.00 O08        | M-006284- purinergic receptor P2X, ligand        | 5024.00 P2RX3         | 2240.00        |
| 50018.00 O09        | M-006180- glycine receptor, alpha 1 (start       | 2741.00 GLRA1         | 2157.00        |
| 50018.00 O10        | M-006283- purinergic receptor P2X, ligand        | 22953.00 P2RX2        | 1580.00        |
| 50018.00 O11        | M-006181- glycine receptor, alpha 2              | 2742.00 GLRA2         | 1854.00        |
| 50018.00 O12        | M-005098- purinergic receptor P2X, ligand        | 5023.00 P2RX1         | 1361.00        |
| <b>50018.00 O13</b> | <b>M-006182- glycine receptor, alpha 3</b>       | <b>8001.00 GLRA3</b>  | <b>1804.00</b> |
| 50018.00 O14        | M-004721- low density lipoprotein-related        | 4035.00 LRP1          | 881.00         |
| 50018.00 O15        | M-006194- glutamate receptor, ionotropic         | 2902.00 GRIN1         | 1604.00        |
| 50018.00 O16        | M-011073- low density lipoprotein receptc        | 3949.00 LDLR          | 2901.00        |
| 50018.00 O17        | M-006195- glutamate receptor, ionotropic         | 2903.00 GRIN2A        | 2385.00        |
| 50018.00 O18        | M-012315- KDEL (Lys-Asp-Glu-Leu) endopl.         | 11014.00 KDELR2       | 2347.00        |
| 50018.00 O19        | M-006196- glutamate receptor, ionotropic         | 2904.00 GRIN2B        | 2781.00        |
| <b>50018.00 O20</b> | <b>M-007964- transmembrane emp24 proteini</b>    | <b>11018.00 TMED1</b> | <b>2142.00</b> |
| 50018.00 O21        | M-006198- glutamate receptor, ionotropic         | 2906.00 GRIN2D        | 1739.00        |
| 50018.00 O23        | M-006206- 5-hydroxytryptamine (serotoni          | 170572.00 HTR3C       | 707.00         |
| 50018.00 P02        | M-003446- thyroid hormone receptor, alpl         | 7067.00 THRA          | 1456.00        |
| 50018.00 P04        | M-006565- transforming growth factor bet         | 7041.00 TGFB11        | 896.00         |
| 50018.00 P05        | M-004715- toll-like receptor 8                   | 51311.00 TLR8         | 3352.00        |
| 50018.00 P06        | M-006690- signal transducer and activator        | 6778.00 STAT6         | 1091.00        |
| 50018.00 P07        | M-010546- tumor necrosis factor (TNF sup         | 7124.00 TNF           | 1275.00        |
| 50018.00 P08        | M-010539- signal transducer and activator        | 6777.00 STAT5B        | 888.00         |
| 50018.00 P09        | M-008094- tumor necrosis factor receptor         | 4982.00 TNFRSF11B     | 2400.00        |
| 50018.00 P10        | M-005169- signal transducer and activator        | 6776.00 STAT5A        | 2023.00        |
| 50018.00 P11        | M-010661- tumor necrosis factor receptor         | 51330.00 TNFRSF12A    | 1634.00        |
| 50018.00 P12        | M-011784- signal transducer and activator        | 6775.00 STAT4         | 1640.00        |
| 50018.00 P13        | M-008096- tumor necrosis factor receptor         | 8764.00 TNFRSF14      | 1678.00        |
| <b>50018.00 P14</b> | <b>M-012064- signal transducer and activator</b> | <b>6773.00 STAT2</b>  | <b>1335.00</b> |
| 50018.00 P15        | M-006449- tumor necrosis factor receptor         | 8784.00 TNFRSF18      | 3252.00        |
| 50018.00 P16        | M-003543- signal transducer and activator        | 6772.00 STAT1         | 2324.00        |
| 50018.00 P17        | M-008098- tumor necrosis factor receptor         | 55504.00 TNFRSF19     | 3164.00        |
| 50018.00 P18        | M-008598- single-minded homolog 2 (Dro:          | 6493.00 SIM2          | 1479.00        |
| 50018.00 P19        | M-005197- tumor necrosis factor receptor         | 7132.00 TNFRSF1A      | 1368.00        |
| 50018.00 P20        | M-009791- single-minded homolog 1 (Dro:          | 6492.00 SIM1          | 1774.00        |
| 50018.00 P21        | M-003934- tumor necrosis factor receptor         | 7133.00 TNFRSF1B      | 828.00         |
| 50018.00 P23        | M-004449- tumor necrosis factor receptor         | 8718.00 TNFRSF25      | 171.00         |
|                     |                                                  | mdmdMAD               | 1889.50        |
|                     |                                                  | 3xMAD                 |                |
|                     |                                                  | MADc                  |                |
| 50018.00 C22        |                                                  |                       | 2686.00        |
| 50018.00 D22        |                                                  |                       | 2731.00        |
| 50018.00 E22        |                                                  |                       | 3062.00        |

|              |                                            |         |               |                   |
|--------------|--------------------------------------------|---------|---------------|-------------------|
| 50018.00 F22 |                                            | 2343.00 | 11.99         |                   |
|              |                                            |         |               | <b>mn 2826.33</b> |
|              |                                            |         |               | sd 205.33         |
| 50018.00 G22 |                                            |         |               | 509.00            |
| 50018.00 H22 |                                            |         |               | 1237.00           |
| 50018.00 I22 |                                            |         |               | 882.00            |
| 50018.00 J22 |                                            |         |               | 1942.00           |
|              |                                            |         |               | <b>mn 1142.50</b> |
|              |                                            |         |               | sd 610.28         |
|              |                                            |         |               | 3posSD            |
|              |                                            |         |               | 3negSD            |
|              |                                            |         |               | Sum3SD            |
|              |                                            |         |               | MnDiff            |
|              |                                            |         |               | SumovrM           |
|              |                                            |         |               | <b>1minus</b>     |
| 50018.00 G03 | M-003290- polo-like kinase 1 (Drosophila)  | 5347.00 | PLK1 SMARTpoc | 202.00            |
| 50018.00 H03 | M-003290- polo-like kinase 1 (Drosophila)  | 5347.00 | PLK1 SMARTpoc | 112.00            |
| 50018.00 I03 | D-001206-∴siControl non-targeting siRNA #2 |         |               | 1512.00           |
| 50018.00 J03 | D-001206-∴siControl non-targeting siRNA #2 |         |               | 2498.00           |
| 50018.00 K03 | D-001600-(siGLO RISC-free siRNA            |         |               | 4583.00           |
| 50018.00 L03 | D-001600-(siGLO RISC-free siRNA            |         |               | 4039.00           |

| abs dev | robust Z | % inf | abs dev | robust Z | % inf | abs dev | robust Z |       |      |
|---------|----------|-------|---------|----------|-------|---------|----------|-------|------|
| 8.10    | 4.41     | 1.71  | 1591.00 | 8.49     | 4.29  | 1.37    | 2203.00  | 11.67 | 7.59 |
| 5.60    | 1.91     | 0.74  | 1668.00 | 5.16     | 0.96  | 0.31    | 2993.00  | 4.54  | 0.46 |
| 5.13    | 1.44     | 0.56  | 1860.00 | 5.54     | 1.34  | 0.43    | 2751.00  | 3.53  | 0.55 |
| 7.28    | 3.59     | 1.39  | 1246.00 | 8.99     | 4.79  | 1.53    | 2754.00  | 6.61  | 2.53 |
| 3.85    | 0.16     | 0.06  | 657.00  | 14.31    | 10.11 | 3.23    | 1323.00  | 9.30  | 5.22 |
| 9.65    | 5.96     | 2.31  | 1549.00 | 2.45     | 1.75  | -0.56   | 2459.00  | 7.44  | 3.36 |
| 2.79    | 0.90     | -0.35 | 1295.00 | 2.32     | 1.88  | -0.60   | 2397.00  | 3.42  | 0.66 |
| 7.12    | 3.43     | 1.33  | 1978.00 | 6.42     | 2.22  | 0.71    | 3380.00  | 6.33  | 2.25 |
| 6.91    | 3.22     | 1.25  | 984.00  | 2.44     | 1.76  | -0.56   | 1522.00  | 2.76  | 1.32 |
| 12.87   | 9.18     | 3.56  | 947.00  | 5.70     | 1.50  | 0.48    | 1358.00  | 4.05  | 0.03 |
| 5.51    | 1.82     | 0.71  | 1176.00 | 5.27     | 1.07  | 0.34    | 1511.00  | 6.88  | 2.80 |
| 1.06    | 2.63     | -1.02 | 1425.00 | 5.05     | 0.85  | 0.27    | 1887.00  | 2.70  | 1.38 |
| 2.38    | 1.31     | -0.51 | 1447.00 | 2.83     | 1.37  | -0.44   | 2297.00  | 3.70  | 0.38 |
| 3.25    | 0.44     | -0.17 | 674.00  | 5.34     | 1.14  | 0.37    | 1837.00  | 4.30  | 0.22 |
| 5.54    | 1.85     | 0.72  | 932.00  | 3.76     | 0.44  | -0.14   | 1723.00  | 4.12  | 0.04 |
| 9.92    | 6.23     | 2.42  | 1005.00 | 4.78     | 0.58  | 0.19    | 2479.00  | 3.31  | 0.77 |
| 4.23    | 0.54     | 0.21  | 626.00  | 4.79     | 0.59  | 0.19    | 1282.00  | 5.15  | 1.07 |
| 7.11    | 3.42     | 1.33  | 1146.00 | 2.71     | 1.49  | -0.48   | 2148.00  | 4.61  | 0.53 |
| 6.38    | 2.69     | 1.04  | 1343.00 | 3.05     | 1.15  | -0.37   | 2049.00  | 5.81  | 1.73 |
| 2.34    | 1.35     | -0.53 | 921.00  | 1.09     | 3.11  | -0.99   | 859.00   | 7.80  | 3.72 |
| 2.08    | 1.61     | -0.63 | 978.00  | 7.46     | 3.26  | 1.04    | 1241.00  | 1.61  | 2.47 |
| 3.26    | 0.43     | -0.17 | 1705.00 | 9.62     | 5.42  | 1.73    | 2075.00  | 2.31  | 1.77 |
| 0.91    | 2.78     | -1.08 | 2499.00 | 8.92     | 4.72  | 1.51    | 3180.00  | 1.48  | 2.60 |
| 0.81    | 2.88     | -1.12 | 2061.00 | 4.90     | 0.70  | 0.23    | 2929.00  | 0.92  | 3.16 |
| 2.46    | 1.23     | -0.48 | 1726.00 | 4.64     | 0.44  | 0.14    | 2823.00  | 3.08  | 1.00 |
| 3.20    | 0.49     | -0.19 | 883.00  | 2.38     | 1.82  | -0.58   | 1093.00  | 3.39  | 0.69 |
| 3.11    | 0.58     | -0.23 | 846.00  | 7.33     | 3.13  | 1.00    | 1590.00  | 2.33  | 1.75 |
| 8.92    | 5.23     | 2.03  | 830.00  | 14.70    | 10.50 | 3.36    | 1729.00  | 5.03  | 0.95 |
| 3.19    | 0.50     | -0.20 | 1790.00 | 10.28    | 6.08  | 1.94    | 3088.00  | 5.25  | 1.17 |
| 1.44    | 2.25     | -0.87 | 1013.00 | 4.34     | 0.14  | 0.05    | 1874.00  | 1.07  | 3.01 |
| 4.30    | 0.61     | 0.23  | 1149.00 | 1.57     | 2.63  | -0.84   | 1511.00  | 1.39  | 2.69 |
| 12.82   | 9.13     | 3.54  | 3001.00 | 6.70     | 2.50  | 0.80    | 3351.00  | 8.92  | 4.84 |
| 4.32    | 0.63     | 0.24  | 1623.00 | 3.33     | 0.87  | -0.28   | 1585.00  | 1.45  | 2.63 |
| 5.87    | 2.18     | 0.84  | 918.00  | 5.12     | 0.92  | 0.30    | 1422.00  | 1.05  | 3.03 |
| 2.76    | 0.93     | -0.36 | 1988.00 | 1.46     | 2.74  | -0.87   | 2536.00  | 3.63  | 0.45 |
| 5.00    | 1.31     | 0.51  | 707.00  | 2.40     | 1.80  | -0.57   | 1444.00  | 0.35  | 3.73 |
| 8.73    | 5.04     | 1.96  | 2380.00 | 3.82     | 0.38  | -0.12   | 4925.00  | 2.94  | 1.14 |
| 6.28    | 2.59     | 1.00  | 2014.00 | 1.74     | 2.46  | -0.79   | 4442.00  | 5.31  | 1.23 |
| 8.84    | 5.15     | 2.00  | 2080.00 | 2.31     | 1.89  | -0.60   | 3618.00  | 2.24  | 1.84 |
| 5.44    | 1.75     | 0.68  | 2010.00 | 0.65     | 3.55  | -1.13   | 4133.00  | 1.48  | 2.60 |
| 2.82    | 0.87     | -0.34 | 2389.00 | 8.87     | 4.67  | 1.50    | 2758.00  | 4.57  | 0.49 |
| 4.55    | 0.86     | 0.33  | 2006.00 | 13.11    | 8.91  | 2.85    | 2410.00  | 5.60  | 1.52 |
| 2.79    | 0.90     | -0.35 | 1976.00 | 6.38     | 2.18  | 0.70    | 2551.00  | 1.61  | 2.47 |
| 1.47    | 2.22     | -0.86 | 2165.00 | 6.47     | 2.27  | 0.73    | 2600.00  | 2.31  | 1.77 |
| 5.07    | 1.38     | 0.53  | 2373.00 | 7.67     | 3.47  | 1.11    | 2191.00  | 3.10  | 0.98 |
| 1.38    | 2.31     | -0.90 | 1481.00 | 4.93     | 0.73  | 0.23    | 1667.00  | 1.08  | 3.00 |



|       |       |       |         |       |       |       |         |       |      |
|-------|-------|-------|---------|-------|-------|-------|---------|-------|------|
| 2.08  | 1.61  | -0.63 | 1922.00 | 1.82  | 2.38  | -0.76 | 1707.00 | 1.41  | 2.67 |
| 5.57  | 1.88  | 0.73  | 2009.00 | 4.68  | 0.48  | 0.15  | 1633.00 | 2.76  | 1.32 |
| 2.41  | 1.28  | -0.50 | 1989.00 | 3.77  | 0.43  | -0.14 | 2907.00 | 1.44  | 2.64 |
| 2.87  | 0.82  | -0.32 | 1524.00 | 3.41  | 0.79  | -0.25 | 1491.00 | 1.07  | 3.01 |
| 6.43  | 2.74  | 1.06  | 1182.00 | 3.89  | 0.31  | -0.10 | 1617.00 | 1.67  | 2.41 |
| 6.39  | 2.70  | 1.05  | 1717.00 | 2.97  | 1.23  | -0.39 | 1850.00 | 2.11  | 1.97 |
| 10.55 | 6.86  | 2.66  | 1317.00 | 3.11  | 1.09  | -0.35 | 2225.00 | 4.58  | 0.50 |
| 3.82  | 0.13  | 0.05  | 582.00  | 4.98  | 0.78  | 0.25  | 1097.00 | 3.10  | 0.98 |
| 4.93  | 1.24  | 0.48  | 1139.00 | 2.02  | 2.18  | -0.70 | 1820.00 | 1.32  | 2.76 |
| 19.26 | 15.57 | 6.04  | 1215.00 | 3.79  | 0.41  | -0.13 | 1441.00 | 9.37  | 5.29 |
| 5.56  | 1.87  | 0.72  | 1217.00 | 2.96  | 1.24  | -0.40 | 2147.00 | 1.30  | 2.78 |
| 8.33  | 4.64  | 1.80  | 1829.00 | 2.79  | 1.41  | -0.45 | 2318.00 | 2.55  | 1.53 |
| 6.47  | 2.78  | 1.08  | 1435.00 | 5.09  | 0.89  | 0.28  | 2537.00 | 11.98 | 7.90 |
| 5.43  | 1.74  | 0.67  | 1080.00 | 1.20  | 3.00  | -0.96 | 2248.00 | 5.83  | 1.75 |
| 3.38  | 0.31  | -0.12 | 3834.00 | 8.45  | 4.25  | 1.36  | 3620.00 | 4.92  | 0.84 |
| 13.93 | 10.24 | 3.98  | 2026.00 | 7.95  | 3.75  | 1.20  | 3669.00 | 7.82  | 3.74 |
| 6.97  | 3.28  | 1.27  | 1647.00 | 4.43  | 0.23  | 0.08  | 1542.00 | 5.38  | 1.30 |
| 12.09 | 8.40  | 3.26  | 935.00  | 9.63  | 5.43  | 1.74  | 881.00  | 5.90  | 1.82 |
| 8.01  | 4.32  | 1.68  | 993.00  | 6.45  | 2.25  | 0.72  | 2128.00 | 2.91  | 1.17 |
| 10.81 | 7.12  | 2.76  | 839.00  | 9.65  | 5.45  | 1.75  | 1679.00 | 6.49  | 2.41 |
| 6.77  | 3.08  | 1.19  | 1607.00 | 5.91  | 1.71  | 0.55  | 1741.00 | 5.11  | 1.03 |
| 9.14  | 5.45  | 2.12  | 642.00  | 21.18 | 16.98 | 5.43  | 1148.00 | 8.28  | 4.20 |
| 10.88 | 7.19  | 2.79  | 1084.00 | 8.49  | 4.29  | 1.37  | 1377.00 | 6.75  | 2.67 |
| 7.19  | 3.50  | 1.36  | 988.00  | 3.64  | 0.56  | -0.18 | 1747.00 | 3.32  | 0.76 |
| 6.75  | 3.06  | 1.19  | 2258.00 | 3.81  | 0.39  | -0.12 | 3017.00 | 5.83  | 1.75 |
| 6.49  | 2.80  | 1.09  | 2321.00 | 3.96  | 0.24  | -0.07 | 2855.00 | 3.64  | 0.44 |
| 5.16  | 1.47  | 0.57  | 998.00  | 4.51  | 0.31  | 0.10  | 1512.00 | 4.10  | 0.02 |
| 5.70  | 2.01  | 0.78  | 1352.00 | 5.03  | 0.83  | 0.27  | 1749.00 | 5.43  | 1.35 |
| 6.55  | 2.86  | 1.11  | 1057.00 | 4.07  | 0.13  | -0.04 | 1294.00 | 5.33  | 1.25 |
| 8.56  | 4.87  | 1.89  | 2140.00 | 3.79  | 0.42  | -0.13 | 3113.00 | 4.66  | 0.58 |
| 12.63 | 8.94  | 3.47  | 1728.00 | 3.88  | 0.32  | -0.10 | 2438.00 | 4.96  | 0.88 |
| 8.05  | 4.36  | 1.69  | 1697.00 | 2.36  | 1.84  | -0.59 | 2808.00 | 2.07  | 2.01 |
| 4.15  | 0.46  | 0.18  | 1425.00 | 2.46  | 1.74  | -0.56 | 2901.00 | 4.24  | 0.16 |
| 8.56  | 4.87  | 1.89  | 3800.00 | 3.63  | 0.57  | -0.18 | 5060.00 | 9.11  | 5.03 |
| 1.42  | 2.27  | -0.88 | 2646.00 | 3.14  | 1.06  | -0.34 | 4130.00 | 1.19  | 2.89 |
| 6.17  | 2.48  | 0.96  | 2273.00 | 2.60  | 1.60  | -0.51 | 3209.00 | 1.34  | 2.74 |
| 5.62  | 1.93  | 0.75  | 2249.00 | 3.20  | 1.00  | -0.32 | 3752.00 | 2.83  | 1.25 |
| 4.17  | 0.48  | 0.18  | 2897.00 | 3.24  | 0.96  | -0.30 | 4311.00 | 3.25  | 0.83 |
| 6.30  | 2.61  | 1.01  | 999.00  | 2.80  | 1.40  | -0.45 | 2208.00 | 1.40  | 2.68 |
| 4.31  | 0.62  | 0.24  | 1307.00 | 1.84  | 2.36  | -0.75 | 1978.00 | 0.35  | 3.73 |
| 7.86  | 4.17  | 1.62  | 1813.00 | 1.65  | 2.55  | -0.81 | 3505.00 | 4.68  | 0.60 |
| 6.60  | 2.91  | 1.13  | 1215.00 | 4.12  | 0.08  | -0.03 | 1884.00 | 5.52  | 1.44 |
| 5.19  | 1.50  | 0.58  | 1734.00 | 3.46  | 0.74  | -0.24 | 1233.00 | 1.87  | 2.21 |
| 3.69  | 0.00  | 0.00  | 1569.00 | 0.38  | 3.82  | -1.22 | 2110.00 | 2.75  | 1.33 |
| 3.55  | 0.14  | -0.06 | 1616.00 | 2.85  | 1.35  | -0.43 | 2911.00 | 6.15  | 2.07 |
| 3.08  | 0.61  | -0.24 | 2344.00 | 1.54  | 2.66  | -0.85 | 3596.00 | 3.64  | 0.44 |
| 1.05  | 2.64  | -1.03 | 1355.00 | 2.21  | 1.99  | -0.63 | 1480.00 | 1.62  | 2.46 |

|              |              |             |                |              |              |              |                |              |             |
|--------------|--------------|-------------|----------------|--------------|--------------|--------------|----------------|--------------|-------------|
| 1.18         | 2.51         | -0.98       | 1280.00        | 1.48         | 2.72         | -0.87        | 1411.00        | 1.42         | 2.66        |
| 5.22         | 1.53         | 0.59        | 2405.00        | 1.83         | 2.37         | -0.76        | 3090.00        | 4.21         | 0.13        |
| 3.06         | 0.63         | -0.24       | 2298.00        | 1.00         | 3.20         | -1.02        | 4185.00        | 7.29         | 3.21        |
| 8.34         | 4.65         | 1.80        | 2293.00        | 3.97         | 0.23         | -0.07        | 3001.00        | 3.37         | 0.71        |
| <u>13.20</u> | <u>9.51</u>  | <u>3.69</u> | <u>2360.00</u> | <u>3.94</u>  | <u>0.26</u>  | <u>-0.08</u> | <u>4426.00</u> | <u>10.26</u> | <u>6.18</u> |
| 5.52         | 1.83         | 0.71        | 1773.00        | 1.35         | 2.85         | -0.91        | 2411.00        | 9.91         | <u>5.83</u> |
| 3.72         | 0.03         | 0.01        | 3348.00        | 1.79         | 2.41         | -0.77        | 5528.00        | 3.33         | 0.75        |
| 0.29         | 3.40         | -1.32       | 2775.00        | 2.34         | 1.86         | -0.59        | 2365.00        | 3.13         | 0.95        |
| 0.35         | 3.34         | -1.30       | 2756.00        | 5.84         | 1.64         | 0.53         | 2984.00        | 3.38         | 0.70        |
| 5.97         | 2.28         | 0.88        | 3708.00        | 11.17        | <u>6.97</u>  | <u>2.23</u>  | 3307.00        | 7.38         | 3.30        |
| 4.39         | 0.70         | 0.27        | 2744.00        | 5.25         | 1.05         | 0.34         | 1515.00        | 2.38         | 1.70        |
| 2.52         | 1.17         | -0.46       | 2267.00        | 3.22         | 0.98         | -0.31        | 2391.00        | 5.02         | 0.94        |
| 3.63         | 0.06         | -0.03       | 2845.00        | 7.35         | 3.15         | 1.01         | 3004.00        | 4.33         | 0.25        |
| 1.58         | 2.11         | -0.82       | 2565.00        | 1.99         | 2.21         | -0.71        | 2387.00        | 2.89         | 1.19        |
| 1.36         | 2.34         | -0.91       | 1831.00        | 6.88         | 2.68         | 0.86         | 1815.00        | 4.19         | 0.11        |
| 3.39         | 0.30         | -0.12       | 1846.00        | 8.13         | 3.93         | 1.26         | 1523.00        | 5.25         | 1.17        |
| 1.98         | 1.71         | -0.66       | 2965.00        | 3.84         | 0.36         | -0.11        | 2379.00        | 2.10         | 1.98        |
| 3.51         | 0.18         | -0.07       | 1142.00        | 5.43         | 1.23         | 0.39         | 1364.00        | 4.03         | 0.05        |
| <u>9.95</u>  | <u>6.26</u>  | <u>2.43</u> | <u>3274.00</u> | <u>20.04</u> | <u>15.84</u> | <u>5.06</u>  | <u>4964.00</u> | <u>11.32</u> | <u>7.24</u> |
| 1.48         | 2.21         | -0.86       | 2147.00        | 2.19         | 2.01         | -0.64        | 2472.00        | 2.87         | 1.21        |
| 0.00         | 3.69         | -1.43       | 1708.00        | 3.28         | 0.92         | -0.29        | 1652.00        | 2.97         | 1.11        |
| 0.41         | 3.28         | -1.27       | 2658.00        | 3.31         | 0.89         | -0.28        | 2965.00        | 0.94         | 3.14        |
| 2.18         | 1.51         | -0.59       | 1188.00        | 4.12         | 0.08         | -0.02        | 2047.00        | 6.55         | 2.47        |
| 1.79         | 1.90         | -0.74       | 2518.00        | 1.67         | 2.53         | -0.81        | 3018.00        | 4.51         | 0.43        |
| 4.82         | 1.13         | 0.44        | 2236.00        | 7.78         | 3.58         | 1.15         | 1917.00        | 3.81         | 0.27        |
| 7.71         | 4.02         | 1.56        | 3443.00        | 2.12         | 2.08         | -0.66        | 4122.00        | 2.67         | 1.41        |
| 2.18         | 1.51         | -0.59       | 4234.00        | 3.05         | 1.15         | -0.37        | 3701.00        | 2.38         | 1.70        |
| 3.16         | 0.53         | -0.21       | 4738.00        | 4.81         | 0.61         | 0.20         | 5120.00        | 5.31         | 1.23        |
| <u>9.59</u>  | <u>5.90</u>  | <u>2.29</u> | <u>3140.00</u> | <u>9.24</u>  | 5.04         | 1.61         | <u>4730.00</u> | <u>10.51</u> | <u>6.43</u> |
| 1.21         | 2.48         | -0.96       | 1993.00        | 4.32         | 0.12         | 0.04         | 2697.00        | 1.82         | 2.26        |
| 4.27         | 0.58         | 0.22        | 3504.00        | 6.08         | 1.88         | 0.60         | 2887.00        | 3.39         | 0.69        |
| 1.83         | 1.86         | -0.72       | 1749.00        | 1.20         | 3.00         | -0.96        | 2951.00        | 2.78         | 1.30        |
| 6.76         | 3.07         | 1.19        | 1304.00        | 5.52         | 1.32         | 0.42         | 2311.00        | 8.78         | 4.70        |
| 3.42         | 0.27         | -0.10       | 2559.00        | 6.57         | 2.37         | 0.76         | 3339.00        | 8.15         | 4.07        |
| 1.07         | 2.62         | -1.02       | 1716.00        | 5.36         | 1.16         | 0.37         | 2607.00        | 4.53         | 0.45        |
| 14.29        | <u>10.60</u> | <u>4.11</u> | 3638.00        | 6.05         | 1.85         | 0.59         | 4320.00        | 9.40         | 5.32        |
| 3.95         | 0.26         | 0.10        | 2141.00        | 3.27         | 0.93         | -0.30        | 3207.00        | 3.18         | 0.90        |
| 1.56         | 2.13         | -0.83       | 1837.00        | 8.38         | 4.18         | 1.34         | 2051.00        | 6.83         | 2.75        |
| 1.93         | 1.76         | -0.69       | 2027.00        | 7.89         | 3.69         | 1.18         | 1996.00        | 3.61         | 0.47        |
| 2.43         | 1.26         | -0.49       | 1847.00        | 1.73         | 2.47         | -0.79        | 4071.00        | 1.82         | 2.26        |
| 2.07         | 1.62         | -0.63       | 2532.00        | 3.59         | 0.61         | -0.19        | 2693.00        | 0.97         | 3.11        |
| 4.22         | 0.53         | 0.20        | 1367.00        | 5.12         | 0.92         | 0.30         | 2208.00        | 5.25         | 1.17        |
| 2.01         | 1.68         | -0.65       | 1724.00        | 2.61         | 1.59         | -0.51        | 3364.00        | 0.89         | 3.19        |
| 3.17         | 0.52         | -0.20       | 1118.00        | 2.33         | 1.87         | -0.60        | 1676.00        | 1.79         | 2.29        |
| 6.67         | 2.98         | 1.15        | 2549.00        | 5.06         | 0.86         | 0.28         | 4978.00        | 6.23         | 2.15        |
| 2.40         | 1.29         | -0.50       | 733.00         | 2.32         | 1.88         | -0.60        | 2032.00        | 1.48         | 2.60        |
| 5.16         | 1.47         | 0.57        | 2285.00        | 3.19         | 1.01         | -0.32        | 3447.00        | 2.32         | 1.76        |

|      |      |       |         |       |       |       |         |       |      |
|------|------|-------|---------|-------|-------|-------|---------|-------|------|
| 3.29 | 0.40 | -0.16 | 1793.00 | 1.39  | 2.81  | -0.90 | 3529.00 | 2.15  | 1.93 |
| 1.86 | 1.83 | -0.71 | 3277.00 | 4.55  | 0.35  | 0.11  | 4414.00 | 3.24  | 0.84 |
| 2.21 | 1.48 | -0.57 | 4067.00 | 6.07  | 1.87  | 0.60  | 4256.00 | 2.28  | 1.80 |
| 1.20 | 2.49 | -0.97 | 1321.00 | 3.26  | 0.94  | -0.30 | 1820.00 | 0.82  | 3.26 |
| 3.02 | 0.67 | -0.26 | 3300.00 | 6.45  | 2.25  | 0.72  | 2058.00 | 1.41  | 2.67 |
| 4.84 | 1.15 | 0.44  | 2839.00 | 8.31  | 4.11  | 1.32  | 2903.00 | 1.65  | 2.43 |
| 0.64 | 3.05 | -1.18 | 1026.00 | 4.29  | 0.09  | 0.03  | 1860.00 | 0.97  | 3.11 |
| 3.14 | 0.55 | -0.21 | 1955.00 | 5.73  | 1.53  | 0.49  | 2509.00 | 1.47  | 2.61 |
| 2.12 | 1.57 | -0.61 | 871.00  | 10.45 | 6.25  | 2.00  | 1284.00 | 2.02  | 2.06 |
| 2.66 | 1.03 | -0.40 | 1862.00 | 1.02  | 3.18  | -1.02 | 2612.00 | 0.77  | 3.31 |
| 3.98 | 0.29 | 0.11  | 1499.00 | 4.60  | 0.40  | 0.13  | 2182.00 | 1.51  | 2.57 |
| 1.66 | 2.03 | -0.79 | 3422.00 | 4.68  | 0.48  | 0.15  | 2417.00 | 1.16  | 2.92 |
| 7.69 | 4.00 | 1.55  | 3215.00 | 8.34  | 4.14  | 1.32  | 3890.00 | 4.65  | 0.57 |
| 1.74 | 1.95 | -0.76 | 2879.00 | 5.00  | 0.80  | 0.26  | 3681.00 | 0.92  | 3.16 |
| 3.96 | 0.27 | 0.11  | 3587.00 | 7.25  | 3.05  | 0.98  | 3102.00 | 1.68  | 2.40 |
| 4.69 | 1.00 | 0.39  | 1571.00 | 22.72 | 18.52 | 5.92  | 2624.00 | 1.94  | 2.14 |
| 3.02 | 0.67 | -0.26 | 2884.00 | 6.97  | 2.77  | 0.89  | 3206.00 | 1.25  | 2.83 |
| 3.24 | 0.45 | -0.18 | 1131.00 | 15.21 | 11.01 | 3.52  | 1839.00 | 0.98  | 3.10 |
| 2.44 | 1.25 | -0.49 | 3375.00 | 3.94  | 0.26  | -0.08 | 4118.00 | 1.46  | 2.62 |
| 0.94 | 2.75 | -1.07 | 2574.00 | 1.86  | 2.34  | -0.75 | 3076.00 | 0.81  | 3.27 |
| 6.69 | 3.00 | 1.16  | 4043.00 | 3.76  | 0.44  | -0.14 | 5191.00 | 5.43  | 1.35 |
| 5.37 | 1.68 | 0.65  | 3830.00 | 1.04  | 3.16  | -1.01 | 5686.00 | 7.54  | 3.46 |
| 6.51 | 2.82 | 1.10  | 2629.00 | 0.68  | 3.52  | -1.12 | 3370.00 | 2.28  | 1.80 |
| 4.98 | 1.29 | 0.50  | 1227.00 | 2.69  | 1.51  | -0.48 | 1803.00 | 4.27  | 0.19 |
| 1.92 | 1.77 | -0.69 | 2095.00 | 1.58  | 2.62  | -0.84 | 3245.00 | 3.51  | 0.57 |
| 4.23 | 0.54 | 0.21  | 2294.00 | 0.70  | 3.50  | -1.12 | 3130.00 | 4.12  | 0.04 |
| 6.22 | 2.53 | 0.98  | 2070.00 | 1.30  | 2.90  | -0.92 | 3805.00 | 7.31  | 3.23 |
| 4.77 | 1.08 | 0.42  | 2318.00 | 1.77  | 2.43  | -0.78 | 3586.00 | 3.68  | 0.40 |
| 6.70 | 3.01 | 1.17  | 2994.00 | 1.00  | 3.20  | -1.02 | 2987.00 | 2.38  | 1.70 |
| 3.19 | 0.50 | -0.20 | 1356.00 | 0.15  | 4.05  | -1.29 | 1935.00 | 1.91  | 2.17 |
| 5.94 | 2.25 | 0.87  | 1755.00 | 0.23  | 3.97  | -1.27 | 1906.00 | 2.52  | 1.56 |
| 8.32 | 4.63 | 1.80  | 1791.00 | 2.01  | 2.19  | -0.70 | 2795.00 | 1.54  | 2.54 |
| 3.38 | 0.31 | -0.12 | 2750.00 | 0.91  | 3.29  | -1.05 | 2759.00 | 1.09  | 2.99 |
| 5.33 | 1.64 | 0.64  | 1736.00 | 2.71  | 1.49  | -0.48 | 2843.00 | 2.39  | 1.69 |
| 8.57 | 4.88 | 1.89  | 2604.00 | 3.34  | 0.86  | -0.27 | 1623.00 | 12.94 | 8.86 |
| 4.95 | 1.26 | 0.49  | 2994.00 | 0.47  | 3.73  | -1.19 | 3142.00 | 2.39  | 1.69 |
| 2.06 | 1.63 | -0.64 | 2516.00 | 0.91  | 3.29  | -1.05 | 4589.00 | 2.59  | 1.49 |
| 8.45 | 4.76 | 1.85  | 2795.00 | 1.90  | 2.30  | -0.74 | 2674.00 | 2.21  | 1.87 |
| 8.91 | 5.22 | 2.03  | 3524.00 | 2.04  | 2.16  | -0.69 | 4496.00 | 3.63  | 0.45 |
| 3.63 | 0.06 | -0.02 | 2467.00 | 1.05  | 3.15  | -1.00 | 3831.00 | 1.59  | 2.49 |
| 2.55 | 1.14 | -0.44 | 3179.00 | 3.08  | 1.12  | -0.36 | 4406.00 | 3.02  | 1.06 |
| 4.00 | 0.31 | 0.12  | 2701.00 | 6.63  | 2.43  | 0.78  | 4142.00 | 5.96  | 1.88 |
| 1.71 | 1.98 | -0.77 | 4089.00 | 7.80  | 3.60  | 1.15  | 3510.00 | 2.31  | 1.77 |
| 3.74 | 0.05 | 0.02  | 3848.00 | 4.47  | 0.27  | 0.09  | 4693.00 | 5.92  | 1.84 |
| 2.95 | 0.74 | -0.29 | 2248.00 | 4.09  | 0.11  | -0.03 | 3024.00 | 5.36  | 1.28 |
| 3.49 | 0.20 | -0.08 | 2633.00 | 0.57  | 3.63  | -1.16 | 3116.00 | 3.02  | 1.06 |
| 1.81 | 1.88 | -0.73 | 2850.00 | 2.91  | 1.29  | -0.41 | 3675.00 | 3.10  | 0.98 |

|      |      |       |         |       |       |       |         |       |       |
|------|------|-------|---------|-------|-------|-------|---------|-------|-------|
| 4.81 | 1.12 | 0.44  | 2015.00 | 3.77  | 0.43  | -0.14 | 3404.00 | 6.17  | 2.09  |
| 1.44 | 2.25 | -0.87 | 3452.00 | 2.03  | 2.17  | -0.69 | 3246.00 | 2.80  | 1.28  |
| 1.85 | 1.84 | -0.72 | 2454.00 | 2.12  | 2.08  | -0.66 | 2776.00 | 3.24  | 0.84  |
| 4.14 | 0.45 | 0.17  | 3578.00 | 5.25  | 1.05  | 0.34  | 2823.00 | 3.51  | 0.57  |
| 4.98 | 1.29 | 0.50  | 1964.00 | 8.91  | 4.71  | 1.51  | 2700.00 | 13.37 | 9.29  |
| 3.03 | 0.66 | -0.26 | 1880.00 | 1.76  | 2.44  | -0.78 | 3369.00 | 2.61  | 1.47  |
| 2.83 | 0.86 | -0.34 | 3284.00 | 2.95  | 1.25  | -0.40 | 1948.00 | 2.82  | 1.26  |
| 3.19 | 0.50 | -0.20 | 3222.00 | 2.95  | 1.25  | -0.40 | 3623.00 | 3.95  | 0.13  |
| 1.13 | 2.56 | -0.99 | 3340.00 | 6.08  | 1.88  | 0.60  | 5889.00 | 5.13  | 1.05  |
| 0.79 | 2.90 | -1.13 | 759.00  | 1.98  | 2.22  | -0.71 | 992.00  | 3.13  | 0.96  |
| 5.07 | 1.38 | 0.53  | 4185.00 | 4.37  | 0.17  | 0.06  | 4047.00 | 6.33  | 2.25  |
| 8.33 | 4.64 | 1.80  | 5212.00 | 6.25  | 2.05  | 0.66  | 5037.00 | 8.81  | 4.73  |
| 3.38 | 0.31 | -0.12 | 4049.00 | 0.84  | 3.36  | -1.07 | 3187.00 | 1.98  | 2.10  |
| 7.48 | 3.79 | 1.47  | 2741.00 | 2.96  | 1.24  | -0.40 | 3659.00 | 2.95  | 1.13  |
| 2.37 | 1.32 | -0.52 | 3434.00 | 12.17 | 7.97  | 2.55  | 5036.00 | 6.61  | 2.53  |
| 1.81 | 1.88 | -0.73 | 3248.00 | 7.57  | 3.37  | 1.08  | 3662.00 | 6.55  | 2.47  |
| 3.65 | 0.04 | -0.02 | 4096.00 | 6.47  | 2.27  | 0.73  | 4013.00 | 3.99  | 0.09  |
| 1.12 | 2.57 | -1.00 | 2917.00 | 1.99  | 2.21  | -0.71 | 4082.00 | 3.18  | 0.90  |
| 6.90 | 3.21 | 1.24  | 4316.00 | 5.86  | 1.66  | 0.53  | 3967.00 | 3.40  | 0.68  |
| 3.51 | 0.18 | -0.07 | 1888.00 | 8.79  | 4.59  | 1.47  | 4001.00 | 5.45  | 1.37  |
| 5.68 | 1.99 | 0.77  | 2705.00 | 10.02 | 5.82  | 1.86  | 3409.00 | 7.45  | 3.37  |
| 5.18 | 1.49 | 0.58  | 2604.00 | 12.79 | 8.59  | 2.75  | 2535.00 | 8.48  | 4.40  |
| 5.53 | 1.84 | 0.71  | 1184.00 | 13.01 | 8.81  | 2.82  | 2198.00 | 7.60  | 3.52  |
| 5.27 | 1.58 | 0.61  | 2197.00 | 10.33 | 6.13  | 1.96  | 3528.00 | 6.58  | 2.50  |
| 5.90 | 2.21 | 0.86  | 3784.00 | 17.97 | 13.77 | 4.40  | 3503.00 | 8.91  | 4.83  |
| 5.86 | 2.17 | 0.84  | 4162.00 | 7.14  | 2.94  | 0.94  | 4401.00 | 5.25  | 1.17  |
| 7.19 | 3.50 | 1.36  | 4310.00 | 4.83  | 0.63  | 0.20  | 4512.00 | 4.19  | 0.11  |
| 2.14 | 1.55 | -0.60 | 1697.00 | 2.36  | 1.84  | -0.59 | 2665.00 | 6.98  | 2.90  |
| 2.36 | 1.33 | -0.52 | 2168.00 | 17.44 | 13.24 | 4.23  | 2117.00 | 12.09 | 8.01  |
| 6.57 | 2.88 | 1.12  | 4424.00 | 10.17 | 5.97  | 1.91  | 3614.00 | 12.18 | 8.10  |
| 4.34 | 0.65 | 0.25  | 2228.00 | 16.43 | 12.23 | 3.91  | 4225.00 | 16.50 | 12.42 |
| 4.73 | 1.04 | 0.40  | 2404.00 | 7.28  | 3.08  | 0.99  | 4094.00 | 11.09 | 7.01  |
| 6.36 | 2.67 | 1.04  | 2580.00 | 4.65  | 0.45  | 0.15  | 3989.00 | 5.84  | 1.76  |
| 2.31 | 1.38 | -0.54 | 2519.00 | 16.91 | 12.71 | 4.07  | 4329.00 | 6.42  | 2.34  |
| 2.71 | 0.98 | -0.38 | 3224.00 | 8.90  | 4.70  | 1.50  | 5303.00 | 9.15  | 5.07  |
| 2.93 | 0.76 | -0.30 | 3601.00 | 4.89  | 0.69  | 0.22  | 3544.00 | 3.24  | 0.84  |
| 3.67 | 0.02 | -0.01 | 2068.00 | 19.63 | 15.43 | 4.94  | 1927.00 | 6.23  | 2.15  |
| 4.31 | 0.62 | 0.24  | 1228.00 | 11.16 | 6.96  | 2.23  | 2178.00 | 3.58  | 0.50  |
| 4.00 | 0.31 | 0.12  | 1906.00 | 9.23  | 5.03  | 1.61  | 2328.00 | 2.88  | 1.20  |
| 7.22 | 3.53 | 1.37  | 3567.00 | 8.19  | 3.99  | 1.28  | 4191.00 | 6.37  | 2.29  |
| 2.86 | 0.83 | -0.32 | 2766.00 | 8.35  | 4.15  | 1.33  | 4277.00 | 8.28  | 4.20  |
| 2.28 | 1.41 | -0.55 | 1328.00 | 8.51  | 4.31  | 1.38  | 2550.00 | 2.00  | 2.08  |
| 0.80 | 2.89 | -1.12 | 1087.00 | 10.40 | 6.20  | 1.98  | 1918.00 | 8.55  | 4.47  |
| 1.16 | 2.53 | -0.98 | 2323.00 | 2.58  | 1.62  | -0.52 | 2976.00 | 2.25  | 1.83  |
| 1.69 | 2.00 | -0.78 | 895.00  | 6.48  | 2.28  | 0.73  | 2850.00 | 8.95  | 4.87  |
| 3.25 | 0.44 | -0.17 | 2503.00 | 4.23  | 0.03  | 0.01  | 3272.00 | 4.74  | 0.66  |

|       |      |       |         |       |       |       |         |       |       |
|-------|------|-------|---------|-------|-------|-------|---------|-------|-------|
| 3.50  | 0.19 | -0.07 | 1968.00 | 3.96  | 0.24  | -0.07 | 3456.00 | 2.49  | 1.59  |
| 3.64  | 0.05 | -0.02 | 2555.00 | 6.26  | 2.06  | 0.66  | 4281.00 | 14.06 | 9.98  |
| 2.85  | 0.84 | -0.33 | 1958.00 | 14.25 | 10.05 | 3.21  | 3828.00 | 5.67  | 1.59  |
| 1.78  | 1.91 | -0.74 | 4181.00 | 2.68  | 1.52  | -0.48 | 4749.00 | 3.73  | 0.35  |
| 7.52  | 3.83 | 1.49  | 4085.00 | 5.80  | 1.60  | 0.51  | 6046.00 | 18.11 | 14.03 |
| 7.10  | 3.41 | 1.32  | 3330.00 | 5.89  | 1.69  | 0.54  | 3047.00 | 7.12  | 3.04  |
| 5.85  | 2.16 | 0.84  | 3509.00 | 4.62  | 0.42  | 0.13  | 4790.00 | 5.37  | 1.29  |
| 1.83  | 1.86 | -0.72 | 3483.00 | 1.18  | 3.02  | -0.97 | 5554.00 | 2.97  | 1.11  |
| 3.49  | 0.20 | -0.08 | 2246.00 | 0.31  | 3.89  | -1.24 | 3775.00 | 3.15  | 0.93  |
| 9.69  | 6.00 | 2.33  | 2577.00 | 0.93  | 3.27  | -1.04 | 2504.00 | 2.16  | 1.92  |
| 11.59 | 7.90 | 3.06  | 3525.00 | 3.80  | 0.40  | -0.13 | 2086.00 | 5.13  | 1.05  |
| 3.95  | 0.26 | 0.10  | 2634.00 | 3.57  | 0.63  | -0.20 | 3312.00 | 4.65  | 0.57  |
| 2.00  | 1.69 | -0.66 | 2537.00 | 1.66  | 2.54  | -0.81 | 3237.00 | 1.70  | 2.38  |
| 5.88  | 2.19 | 0.85  | 2817.00 | 4.65  | 0.45  | 0.15  | 3230.00 | 3.78  | 0.30  |
| 5.80  | 2.11 | 0.82  | 3074.00 | 3.22  | 0.98  | -0.31 | 3441.00 | 4.21  | 0.13  |
| 2.85  | 0.84 | -0.33 | 2651.00 | 1.09  | 3.11  | -0.99 | 2735.00 | 3.33  | 0.75  |
| 4.73  | 1.04 | 0.40  | 2153.00 | 1.02  | 3.18  | -1.01 | 2946.00 | 1.97  | 2.11  |
| 9.82  | 6.13 | 2.38  | 1849.00 | 8.92  | 4.72  | 1.51  | 2804.00 | 8.20  | 4.12  |
| 9.84  | 6.15 | 2.39  | 2711.00 | 3.39  | 0.81  | -0.26 | 4053.00 | 7.85  | 3.77  |
| 5.30  | 1.61 | 0.62  | 3823.00 | 2.54  | 1.66  | -0.53 | 4623.00 | 5.47  | 1.39  |
| 5.41  | 1.72 | 0.66  | 2295.00 | 1.39  | 2.81  | -0.90 | 3072.00 | 4.26  | 0.18  |
| 3.53  | 0.16 | -0.06 | 2769.00 | 0.65  | 3.55  | -1.13 | 4747.00 | 3.90  | 0.18  |
| 5.95  | 2.26 | 0.88  | 3386.00 | 3.10  | 1.10  | -0.35 | 3942.00 | 5.18  | 1.10  |
| 3.98  | 0.29 | 0.11  | 2743.00 | 2.41  | 1.79  | -0.57 | 3291.00 | 2.92  | 1.16  |
| 12.19 | 8.50 | 3.30  | 2854.00 | 6.06  | 1.86  | 0.60  | 5080.00 | 9.25  | 5.17  |
| 2.12  | 1.57 | -0.61 | 2786.00 | 2.91  | 1.29  | -0.41 | 5531.00 | 6.22  | 2.14  |
| 3.57  | 0.12 | -0.05 | 3279.00 | 1.22  | 2.98  | -0.95 | 3942.00 | 3.78  | 0.30  |
| 5.12  | 1.43 | 0.55  | 2606.00 | 3.03  | 1.17  | -0.37 | 2409.00 | 2.37  | 1.71  |
| 4.18  | 0.49 | 0.19  | 3216.00 | 6.75  | 2.55  | 0.82  | 3954.00 | 5.59  | 1.51  |
| 2.38  | 1.31 | -0.51 | 5297.00 | 8.67  | 4.47  | 1.43  | 5367.00 | 7.29  | 3.21  |
| 0.92  | 2.77 | -1.08 | 2959.00 | 5.51  | 1.31  | 0.42  | 3896.00 | 10.55 | 6.47  |
| 4.46  | 0.77 | 0.30  | 1191.00 | 3.02  | 1.18  | -0.38 | 2848.00 | 4.18  | 0.10  |
| 1.34  | 2.35 | -0.91 | 1582.00 | 4.24  | 0.04  | 0.01  | 3975.00 | 7.20  | 3.12  |
| 4.61  | 0.92 | 0.36  | 3582.00 | 6.39  | 2.19  | 0.70  | 5742.00 | 10.01 | 5.93  |
| 0.81  | 2.88 | -1.12 | 2052.00 | 2.19  | 2.01  | -0.64 | 2974.00 | 2.69  | 1.39  |
| 1.97  | 1.72 | -0.67 | 2701.00 | 2.85  | 1.35  | -0.43 | 4901.00 | 6.90  | 2.82  |
| 0.95  | 2.74 | -1.07 | 1408.00 | 4.05  | 0.15  | -0.05 | 3565.00 | 10.58 | 6.50  |
| 1.86  | 1.83 | -0.71 | 1831.00 | 1.91  | 2.29  | -0.73 | 3282.00 | 7.77  | 3.69  |
| 3.13  | 0.57 | -0.22 | 2695.00 | 4.42  | 0.22  | 0.07  | 4015.00 | 6.25  | 2.17  |
| 1.72  | 1.97 | -0.77 | 1318.00 | 3.34  | 0.86  | -0.27 | 3126.00 | 3.90  | 0.18  |
| 3.46  | 0.23 | -0.09 | 1996.00 | 2.05  | 2.15  | -0.68 | 2996.00 | 7.18  | 3.10  |
| 1.86  | 1.83 | -0.71 | 2689.00 | 4.13  | 0.07  | -0.02 | 5204.00 | 7.59  | 3.51  |
| 0.30  | 3.39 | -1.32 | 2639.00 | 0.83  | 3.37  | -1.07 | 3870.00 | 11.03 | 6.95  |
| 3.57  | 0.12 | -0.05 | 1510.00 | 2.19  | 2.01  | -0.64 | 4489.00 | 11.96 | 7.88  |
| 0.63  | 3.06 | -1.19 | 1172.00 | 1.88  | 2.32  | -0.74 | 2739.00 | 12.82 | 8.74  |
| 2.74  | 0.95 | -0.37 | 2463.00 | 6.74  | 2.54  | 0.81  | 5186.00 | 9.24  | 5.16  |
| 3.63  | 0.06 | -0.02 | 1291.00 | 1.86  | 2.34  | -0.75 | 3297.00 | 5.34  | 1.26  |

|              |      |         |         |              |         |       |         |              |       |
|--------------|------|---------|---------|--------------|---------|-------|---------|--------------|-------|
| 3.70         | 0.01 | 0.00    | 3579.00 | 4.33         | 0.13    | 0.04  | 4407.00 | 1.36         | 2.72  |
| 1.03         | 2.66 | -1.03   | 1636.00 | 4.16         | 0.04    | -0.01 | 2236.00 | 1.70         | 2.38  |
| 2.23         | 1.46 | -0.57   | 1634.00 | 14.20        | 10.00   | 3.20  | 1731.00 | 6.53         | 2.45  |
| 3.18         | 0.51 | -0.20   | 3373.00 | 3.05         | 1.15    | -0.37 | 3747.00 | 5.20         | 1.12  |
| 1.95         | 1.74 | -0.68   | 2370.00 | 3.63         | 0.57    | -0.18 | 2659.00 | 2.52         | 1.56  |
| 6.34         | 2.65 | 1.03    | 3651.00 | 10.44        | 6.24    | 1.99  | 4789.00 | 8.71         | 4.63  |
| 1.72         | 1.97 | -0.77   | 2792.00 | 8.24         | 4.04    | 1.29  | 3624.00 | 4.91         | 0.83  |
| 1.90         | 1.79 | -0.70   | 3064.00 | 2.64         | 1.56    | -0.50 | 2607.00 | 1.27         | 2.81  |
| 3.40         | 0.29 | -0.11   | 2075.00 | 17.11        | 12.91   | 4.13  | 3233.00 | 3.74         | 0.34  |
| 0.37         | 3.32 | -1.29   | 2406.00 | 1.83         | 2.37    | -0.76 | 3264.00 | 2.88         | 1.20  |
| <u>10.26</u> | 6.57 | 2.55    | 1777.00 | <u>20.54</u> | 16.34   | 5.23  | 3780.00 | <u>17.46</u> | 13.38 |
| 5.22         | 1.53 | 0.59    | 2260.00 | 6.42         | 2.22    | 0.71  | 2910.00 | 9.69         | 5.61  |
| 2.00         | 1.70 | -0.66   | 2442.00 | 7.13         | 2.93    | 0.94  | 2719.00 | 2.28         | 1.80  |
| 3.69         | 0.00 | 0.00    | 3172.00 | 4.89         | 0.69    | 0.22  | 3458.00 | 4.48         | 0.40  |
| 3.73         | 0.04 | 0.01    | 2929.00 | 6.25         | 2.05    | 0.66  | 3710.00 | 4.80         | 0.72  |
| 1.75         | 1.94 | -0.76   | 3798.00 | 8.93         | 4.73    | 1.51  | 3568.00 | 2.47         | 1.61  |
| 2.73         | 0.96 | -0.37   | 3053.00 | 6.75         | 2.55    | 0.82  | 2415.00 | 5.92         | 1.84  |
| 6.44         | 2.75 | 1.07    | 2576.00 | 11.49        | 7.29    | 2.33  | 3316.00 | 10.28        | 6.20  |
| 1.78         | 1.91 | -0.74   | 1669.00 | 5.99         | 1.79    | 0.57  | 2705.00 | 4.47         | 0.39  |
| 4.67         | 0.98 | 0.38    | 990.00  | 12.42        | 8.22    | 2.63  | 1050.00 | 5.52         | 1.44  |
| 2.88         | 0.81 | -0.31   | 913.00  | 3.61         | 0.59    | -0.19 | 1453.00 | 5.23         | 1.15  |
| 3.35         | 0.34 | -0.13   | 761.00  | 8.15         | 3.95    | 1.26  | 1570.00 | 3.89         | 0.19  |
| 4.36         | 0.67 | 0.26    | 1032.00 | 3.20         | 1.00    | -0.32 | 1738.00 | 0.92         | 3.16  |
| 1.01         | 2.68 | -1.04   | 1099.00 | 3.00         | 1.20    | -0.38 | 1822.00 | 4.01         | 0.07  |
| 3.29         | 0.40 | -0.16   | 1527.00 | 8.71         | 4.51    | 1.44  | 3353.00 | 8.05         | 3.97  |
| 5.41         | 1.72 | 0.66    | 1528.00 | 8.84         | 4.64    | 1.48  | 2366.00 | 2.66         | 1.42  |
| 4.29         | 0.60 | 0.23    | 3059.00 | 6.67         | 2.47    | 0.79  | 4193.00 | 10.40        | 6.32  |
| 1.68         | 2.01 | -0.78   | 2647.00 | 3.21         | 0.99    | -0.31 | 2798.00 | 2.29         | 1.79  |
| 2.33         | 1.36 | -0.53   | 2409.00 | 3.99         | 0.21    | -0.07 | 3529.00 | 5.58         | 1.50  |
| 1.89         | 1.80 | -0.70   | 1551.00 | 2.97         | 1.23    | -0.39 | 3360.00 | 6.46         | 2.38  |
| 2.98         | 0.71 | -0.28   | 2012.00 | 13.62        | 9.42    | 3.01  | 2955.00 | 9.68         | 5.60  |
| 5.54         | 1.85 | 0.72    | 2224.00 | <u>31.21</u> | 27.01   | 8.63  | 3516.00 | <u>13.82</u> | 9.74  |
| 2.89         | 0.80 | -0.31   | 5112.00 | 11.85        | 7.65    | 2.45  | 5773.00 | 4.47         | 0.39  |
| 0.90         | 2.79 | -1.08   | 2543.00 | 14.86        | 10.66   | 3.41  | 3420.00 | 3.77         | 0.31  |
| 4.14         | 0.45 | 0.17    | 3505.00 | 16.29        | 12.09   | 3.87  | 3411.00 | 5.60         | 1.52  |
| 0.54         | 3.15 | -1.22   | 2700.00 | 12.48        | 8.28    | 2.65  | 3941.00 | 5.76         | 1.68  |
| 3.80         | 0.11 | 0.04    | 1600.00 | 26.38        | 22.18   | 7.09  | 2348.00 | 12.65        | 8.57  |
| 3.49         | 0.20 | -0.08   | 1905.00 | 9.66         | 5.46    | 1.75  | 2191.00 | 7.80         | 3.72  |
| 7.25         | 3.56 | 1.38    | 1782.00 | 26.60        | 22.40   | 7.16  | 1297.00 | 26.91        | 22.83 |
| 0.58         | 3.11 | -1.21   | 250.00  | 35.20        | 31.00   | 9.91  | 360.00  | 15.56        | 11.48 |
| 3.69         | 1.74 |         | 2166.50 | 4.20         | 2.11    |       | 2960.00 | 4.08         | 1.81  |
|              | 5.22 |         |         |              | 6.34    |       |         |              | 5.43  |
|              | 2.58 |         |         |              | 3.13    |       |         |              | 2.68  |
| 20.96        |      | 2815.00 | 11.19   |              |         |       |         |              |       |
| 18.35        |      | 2794.00 | 13.24   |              | 3982.00 | 19.84 | 3158.00 | 11.34        |       |
| 21.98        |      | 3238.00 | 17.91   |              | 4265.00 | 23.26 |         |              |       |

|       |         |       |         |       |
|-------|---------|-------|---------|-------|
|       | 4147.00 | 20.91 | 4769.00 | 24.14 |
| 20.43 | 3248.50 | 15.81 | 4338.67 | 22.41 |
| 1.87  | 632.96  | 4.41  | 398.64  | 2.27  |
| 3.54  | 669.00  | 6.43  | 772.00  | 0.26  |
| 4.28  | 999.00  | 4.00  | 1443.00 | 1.18  |
| 2.38  | 985.00  | 0.91  | 1111.00 | 0.63  |
| 0.88  | 1612.00 | 1.36  | 1418.00 | 3.88  |
| 2.77  | 1066.25 | 3.18  | 1186.00 | 1.49  |
| 1.49  | 394.45  | 2.56  | 314.59  | 1.64  |
| 5.62  |         | 13.23 |         | 6.81  |
| 4.46  |         | 7.68  |         | 9.31  |
| 10.08 |         | 20.91 |         | 16.12 |
| 17.66 |         | 12.64 |         | 20.92 |
| 0.57  |         | 1.65  |         | 0.77  |
| 0.43  |         | -0.65 |         | 0.23  |
| 0.00  | 220.00  | 31.36 | 234.00  | 17.09 |
| 6.25  | 160.00  | 11.88 | 348.00  | 4.60  |
| 5.29  | 2142.00 | 1.82  | 5323.00 | 3.98  |
| 2.08  | 1892.00 | 2.48  | 4808.00 | 6.41  |
| 9.30  | 6738.00 | 16.36 | 6135.00 | 15.26 |
| 6.83  | 5856.00 | 16.21 | 6477.00 | 13.03 |

2.83

0.17

-0.20

0.94

1.95

1.26

-0.24

0.84

-0.49

-0.01

1.05

-0.51

-0.14

0.08

0.02

-0.29

0.40

0.20

0.65

1.39

-0.92

-0.66

-0.97

-1.18

-0.37

-0.26

-0.65

0.36 x

toxic a,b,c

0.44

-1.12

-1.00

1.81

-0.98

-1.13

-0.17

-1.39

-0.42

0.46

-0.68

-0.97

0.18

0.57

-0.92

-0.66

-0.36

-1.12



-1.00  
-0.49  
-0.98  
-1.12  
-0.90  
-0.73  
0.19  
-0.36  
-1.03  
1.97  
-1.03  
-0.57  
2.95  
0.65  
0.31  
1.40  
0.49  
0.68  
-0.43  
0.90  
0.39  
1.57 x  
1.00  
-0.28  
0.66  
-0.16  
0.01  
0.51  
0.47  
0.22  
0.33  
-0.75  
0.06  
1.88  
-1.08  
-1.02  
-0.47  
-0.31  
-1.00  
-1.39  
0.23  
0.54  
-0.82  
-0.49  
0.77  
-0.16  
-0.92

toxic a,b

-0.99

0.05

1.20

-0.26

2.31 y

2.18

-0.28

-0.35

-0.26

1.23

-0.63

0.35

0.09

-0.44

0.04

0.44

-0.74

-0.02

2.70 y

-0.45

-0.41

-1.17

0.92

0.16

-0.10

-0.52

-0.63

0.46

2.40 y

-0.84

-0.25

-0.48

1.76

1.52

0.17

1.99

-0.33

1.03

-0.17

-0.84

-1.16

0.44

-1.19

-0.85

0.80

-0.97

-0.65

-0.72  
-0.31  
-0.67  
-1.21  
-0.99  
-0.90  
-1.16  
-0.97  
-0.76  
-1.23  
-0.96  
-1.09  
0.22  
-1.18  
-0.89  
-0.80  
-1.05  
-1.15  
-0.98  
-1.22  
0.51  
1.29  
-0.67  
0.07  
-0.21  
0.02  
1.21  
-0.15  
-0.63  
-0.81  
-0.58  
-0.95  
-1.11  
-0.63  
**3.31**  
-0.63  
-0.55  
-0.70  
-0.17  
-0.93  
-0.39  
0.70  
-0.66  
0.69  
0.48  
-0.39  
-0.36

0.78  
-0.47  
-0.31  
-0.21  
3.47  
-0.55  
-0.47  
-0.05  
0.39  
-0.35  
0.84  
1.77  
-0.78  
-0.42  
0.95  
0.92  
-0.03  
-0.33  
-0.25  
0.51  
1.26  
1.64  
1.31  
0.93  
1.80  
0.44  
0.04  
1.08  
2.99 x  
3.02  
4.63 y  
2.62  
0.66  
0.88  
1.89  
-0.31  
0.80  
-0.18  
-0.45  
0.86  
1.57  
-0.77  
1.67  
-0.68  
1.82  
0.25

tox a,art b,c

-0.59

3.72

0.59

-0.13

5.23

1.14

0.48

-0.41

-0.34

-0.72

0.39

0.21

-0.89

-0.11

0.05

-0.28

-0.79

1.54

1.41

0.52

0.07

-0.07

0.41

-0.43

1.93

0.80

-0.11

-0.64

0.56

1.20

2.41

0.04

1.16

2.21

-0.52

1.05

2.42

1.38

0.81

-0.06

1.16

1.31

2.60

2.94

3.26

1.92

0.47

-1.01  
-0.89  
0.91  
0.42  
-0.58  
1.73  
0.31  
-1.05  
-0.12  
-0.45

4.99 y  
2.09

-0.67  
0.15  
0.27  
-0.60  
0.69

2.32 y  
0.15

0.54  
0.43  
-0.07  
-1.18  
-0.03

1.48  
-0.53

2.36  
-0.67

0.56  
0.89

2.09 x  
3.64 y

toxic a,b

5.54

31.21

13.82

0.15

4.42

5.62

4.89

-0.11

1.25

5.55

2.83

3.21

0.57

0.63

3.20 x  
1.39

toxic b,c

8.52 x  
4.28 x

toxic a,b

toxic a,b

| Plate    | Well | Gene                   | GeneID           | Cell Count | % inf | Abs Dev | rZ    |
|----------|------|------------------------|------------------|------------|-------|---------|-------|
| 50019.00 | A02  | M-010992- ankyrin 1    | 286.00 ANK1      | 1575.00    | 5.78  | 0.78    | 0.25  |
| 50019.00 | A04  | M-012723- SMAD fa      | 4086.00 SMAD1    | 2235.00    | 0.54  | 4.46    | -1.42 |
| 50019.00 | A05  | M-009306- elastin (s   | 2006.00 ELN      | 1848.00    | 2.22  | 2.78    | -0.88 |
| 50019.00 | A06  | M-017725- general t    | 2961.00 GTF2E2   | 1841.00    | 3.97  | 1.03    | -0.33 |
| 50019.00 | A07  | M-014746- enamelir     | 10117.00 ENAM    | 3170.00    | 5.58  | 0.58    | 0.18  |
| 50019.00 | A08  | M-006531- general t    | 2960.00 GTF2E1   | 2003.00    | 3.10  | 1.90    | -0.61 |
| 50019.00 | A09  | M-019628- envoplak     | 2125.00 EVPL     | 4027.00    | 5.91  | 0.91    | 0.29  |
| 50019.00 | A10  | M-012964- general t    | 2959.00 GTF2B    | 1509.00    | 2.92  | 2.08    | -0.66 |
| 50019.00 | A11  | M-021718- filaggrin    | 2312.00 FLG      | 1730.00    | 3.87  | 1.13    | -0.36 |
| 50019.00 | A12  | M-006376- enhancei     | 80314.00 EPC1    | 2893.00    | 2.70  | 2.30    | -0.73 |
| 50019.00 | A13  | M-003893- growth a     | 1647.00 GADD45A  | 3035.00    | 3.72  | 1.28    | -0.41 |
| 50019.00 | A14  | M-017581- embryon      | 8726.00 EED      | 2421.00    | 3.51  | 1.49    | -0.47 |
| 50019.00 | A15  | M-003895- growth a     | 10912.00 GADD45G | 3554.00    | 10.38 | 5.38    | 1.71  |
| 50019.00 | A16  | M-020313- CCR4-NC      | 4848.00 CNOT2    | 1570.00    | 4.59  | 0.41    | -0.13 |
| 50019.00 | A17  | M-011667- glial fibril | 2670.00 GFAP     | 2430.00    | 2.72  | 2.28    | -0.73 |
| 50019.00 | A18  | M-015355- Cbp/p30      | 163732.00 CITED4 | 3208.00    | 5.89  | 0.89    | 0.28  |
| 50019.00 | A19  | M-014183- heparan      | 3339.00 HSPG2    | 2527.00    | 4.27  | 0.73    | -0.23 |
| 50019.00 | A20  | M-008060- pro-plate    | 5473.00 PPBP     | 2250.00    | 4.98  | 0.02    | -0.01 |
| 50019.00 | A21  | M-020783- keratin 7    | 51350.00 KRT76   | 2417.00    | 3.89  | 1.11    | -0.35 |
| 50019.00 | A23  | M-019835- keratin 7    | 9119.00 KRT75    | 2035.00    | 5.85  | 0.85    | 0.27  |
| 50019.00 | B02  | M-010994- apolipop     | 335.00 APOA1     | 2690.00    | 0.37  | 4.63    | -1.47 |
| 50019.00 | B04  | M-010760- annexin /    | 310.00 ANXA7     | 5311.00    | 1.36  | 3.64    | -1.16 |
| 50019.00 | B05  | M-010530- prohibitii   | 5245.00 PHB      | 2608.00    | 2.45  | 2.55    | -0.81 |
| 50019.00 | B06  | M-011202- alpha-fet    | 174.00 AFP       | 3361.00    | 0.77  | 4.23    | -1.34 |
| 50019.00 | B07  | M-019548- suppress     | 8464.00 SUPT3H   | 3753.00    | 0.83  | 4.17    | -1.33 |
| 50019.00 | B08  | M-009605- ATP-bind     | 215.00 ABCD1     | 4036.00    | 3.54  | 1.46    | -0.46 |
| 50019.00 | B09  | M-012144- TATA bo      | 9015.00 TAF1A    | 5389.00    | 2.04  | 2.96    | -0.94 |
| 50019.00 | B10  | M-007315- ATP-bind     | 368.00 ABCC6     | 3622.00    | 2.71  | 2.29    | -0.73 |
| 50019.00 | B11  | M-012146- TATA bo      | 9013.00 TAF1C    | 2278.00    | 2.33  | 2.67    | -0.85 |
| 50019.00 | B12  | M-007312- ATP-bind     | 8714.00 ABCC3    | 3108.00    | 3.12  | 1.88    | -0.60 |
| 50019.00 | B13  | M-012898- ankylosis    | 56172.00 ANKH    | 2440.00    | 1.11  | 3.89    | -1.24 |
| 50019.00 | B14  | M-004225- ATP-bind     | 1244.00 ABCC2    | 3261.00    | 2.09  | 2.91    | -0.93 |
| 50019.00 | B15  | M-003627- adaptor-     | 163.00 AP2B1     | 2393.00    | 2.76  | 2.24    | -0.71 |
| 50019.00 | B16  | M-007308- ATP-bind     | 4363.00 ABCC1    | 3469.00    | 5.13  | 0.13    | 0.04  |
| 50019.00 | B17  | M-017533- adaptor-     | 8546.00 AP3B1    | 2491.00    | 2.33  | 2.67    | -0.85 |
| 50019.00 | B18  | M-007305- ATP-bind     | 22.00 ABCB7      | 4037.00    | 1.51  | 3.49    | -1.11 |
| 50019.00 | B19  | M-011574- apolipop     | 341.00 APOC1     | 2699.00    | 3.26  | 1.74    | -0.55 |
| 50019.00 | B20  | M-003868- ATP-bind     | 5243.00 ABCB1    | 2462.00    | 3.05  | 1.95    | -0.62 |
| 50019.00 | B21  | M-011575- apolipop     | 346.00 APOC4     | 4030.00    | 3.08  | 1.92    | -0.61 |
| 50019.00 | B23  | M-010984- apolipop     | 55937.00 APOM    | 2332.00    | 2.19  | 2.81    | -0.89 |
| 50019.00 | C02  | M-012294- claudin 1    | 10686.00 CLDN16  | 4023.00    | 4.45  | 0.55    | -0.18 |
| 50019.00 | C04  | M-017683- tissue fac   | 7980.00 TFPI2    | 4048.00    | 6.05  | 1.05    | 0.33  |
| 50019.00 | C05  | M-018002- keratin 7    | 319101.00 KRT73  | 4077.00    | 5.37  | 0.37    | 0.12  |
| 50019.00 | C06  | M-019840- eukaryot     | 2107.00 ETF1     | 1942.00    | 4.27  | 0.73    | -0.23 |
| 50019.00 | C07  | M-023057- keratin 1    | 3858.00 KRT10    | 3344.00    | 5.92  | 0.92    | 0.29  |
| 50019.00 | C08  | M-004127- metastas     | 9112.00 MTA1     | 3749.00    | 7.68  | 2.68    | 0.85  |

|                     |                            |                  |              |                |              |              |             |
|---------------------|----------------------------|------------------|--------------|----------------|--------------|--------------|-------------|
| 50019.00 C09        | M-011062- keratin 1        | 3859.00          | KRT12        | 3490.00        | 8.14         | 3.14         | 0.99        |
| 50019.00 C10        | M-019743- thrombo          | 7057.00          | THBS1        | 4728.00        | 9.60         | 4.60         | 1.46        |
| 50019.00 C11        | M-011709- keratin 1        | 3860.00          | KRT13        | 2670.00        | 3.37         | 1.63         | -0.52       |
| 50019.00 C12        | M-004833- protein S        | 5627.00          | PROS1        | 2164.00        | 5.82         | 0.82         | 0.26        |
| 50019.00 C13        | M-010602- keratin 1        | 3861.00          | KRT14        | 4460.00        | 2.00         | 3.00         | -0.95       |
| 50019.00 C14        | M-011061- Kallmanr         | 3730.00          | KAL1         | 2646.00        | 2.31         | 2.69         | -0.86       |
| 50019.00 C15        | M-011710- keratin 1        | 3866.00          | KRT15        | 2556.00        | 3.21         | 1.79         | -0.57       |
| 50019.00 C16        | M-011017- collagen,        | 1294.00          | COL7A1       | 2405.00        | 4.45         | 0.55         | -0.18       |
| 50019.00 C17        | M-017624- keratin 1        | 3880.00          | KRT19        | 3399.00        | 4.50         | 0.50         | -0.16       |
| 50019.00 C18        | M-003646- collagen,        | 1293.00          | COL6A3       | 2755.00        | 2.47         | 2.53         | -0.80       |
| 50019.00 C19        | M-013390- keratin 2        | 54474.00         | KRT20        | 3094.00        | 6.79         | 1.79         | 0.57        |
| 50019.00 C20        | M-011013- collagen,        | 1285.00          | COL4A3       | 4585.00        | 5.04         | 0.04         | 0.01        |
| 50019.00 C21        | M-011066- keratin 2        | 3849.00          | KRT2         | 1704.00        | 4.93         | 0.07         | -0.02       |
| 50019.00 C23        | M-012902- keratin 3        | 3850.00          | KRT3         | 4150.00        | 8.75         | 3.75         | 1.19        |
| 50019.00 D02        | M-004128- ATP-bind         | 19.00            | ABCA1        | 2483.00        | 1.81         | 3.19         | -1.01       |
| 50019.00 D04        | M-013184- X-linked         | 7504.00          | XK           | 4033.00        | 2.85         | 2.15         | -0.68       |
| 50019.00 D05        | M-021494- aquapori         | 358.00           | AQP1         | 3641.00        | 7.11         | 2.11         | 0.67        |
| 50019.00 D06        | M-019825- bestroph         | 7439.00          | BEST1        | 3145.00        | 5.41         | 0.41         | 0.13        |
| 50019.00 D07        | M-019263- aquapori         | 359.00           | AQP2         | 4320.00        | 8.15         | 3.15         | 1.00        |
| 50019.00 D08        | M-020820- STEAP fa         | 55240.00         | STEAP3       | 4174.00        | 2.61         | 2.39         | -0.76       |
| 50019.00 D09        | M-011812- aquapori         | 360.00           | AQP3         | 5579.00        | 10.67        | 5.67         | 1.80        |
| 50019.00 D10        | M-004195- transient        | 59341.00         | TRPV4        | 2650.00        | 4.64         | 0.36         | -0.12       |
| 50019.00 D11        | M-011578- aquapori         | 361.00           | AQP4         | 1188.00        | 7.15         | 2.15         | 0.68        |
| 50019.00 D12        | M-006514- transient        | 80036.00         | TRPM3        | 2639.00        | 2.69         | 2.31         | -0.73       |
| 50019.00 D13        | M-004520- aquapori         | 362.00           | AQP5         | 2054.00        | 1.95         | 3.05         | -0.97       |
| 50019.00 D14        | M-004193- transient        | 7226.00          | TRPM2        | 3976.00        | 3.47         | 1.53         | -0.49       |
| 50019.00 D15        | M-011579- aquapori         | 363.00           | AQP6         | 3462.00        | 4.88         | 0.12         | -0.04       |
| <b>50019.00 D16</b> | <b>M-006513- transient</b> | <b>4308.00</b>   | <b>TRPM1</b> | <b>5263.00</b> | <b>18.03</b> | <b>13.03</b> | <b>4.13</b> |
| 50019.00 D17        | M-008726- aquapori         | 364.00           | AQP7         | 3296.00        | 0.97         | 4.03         | -1.28       |
| 50019.00 D18        | M-004192- transient        | 7225.00          | TRPC6        | 3691.00        | 1.49         | 3.51         | -1.11       |
| 50019.00 D19        | M-013185- ATPase, I        | 50617.00         | ATP6V0A4     | 3312.00        | 2.42         | 2.58         | -0.82       |
| 50019.00 D20        | M-006511- transient        | 7224.00          | TRPC5        | 4373.00        | 4.67         | 0.34         | -0.11       |
| 50019.00 D21        | M-020206- calcium c        | 781.00           | CACNA2D1     | 5053.00        | 10.17        | 5.17         | 1.64        |
| 50019.00 D23        | M-006132- cation ch        | 117155.00        | CATSPER2     | 4262.00        | 3.10         | 1.90         | -0.60       |
| 50019.00 E02        | M-003551- vimentin         | 7431.00          | VIM          | 1961.00        | 5.10         | 0.10         | 0.03        |
| 50019.00 E04        | M-012382- utrophin         | 7402.00          | UTRN         | 3666.00        | 7.04         | 2.04         | 0.64        |
| 50019.00 E05        | M-011711- keratin 4        | 3851.00          | KRT4         | 2745.00        | 9.40         | 4.40         | 1.39        |
| 50019.00 E06        | M-018323- tubulin, $\xi$   | 10426.00         | TUBGCP3      | 2646.00        | 9.45         | 4.45         | 1.41        |
| 50019.00 E07        | M-011067- keratin 5        | 3852.00          | KRT5         | 4597.00        | 8.20         | 3.20         | 1.01        |
| <b>50019.00 E08</b> | <b>M-019841- myotilin</b>  | <b>9499.00</b>   | <b>MYOT</b>  | <b>5008.00</b> | <b>20.93</b> | <b>15.93</b> | <b>5.05</b> |
| <b>50019.00 E09</b> | <b>M-012116- keratin 6</b> | <b>3853.00</b>   | <b>KRT6A</b> | <b>5080.00</b> | <b>21.54</b> | <b>16.54</b> | <b>5.24</b> |
| 50019.00 E10        | M-019753- tropomy          | 7171.00          | TPM4         | 3234.00        | 9.68         | 4.68         | 1.48        |
| 50019.00 E11        | M-012117- keratin 6        | 3854.00          | KRT6B        | 2766.00        | 13.92        | <b>8.92</b>  | <b>2.83</b> |
| 50019.00 E12        | M-012657- tropomy          | 7169.00          | TPM2         | 3505.00        | 4.19         | 0.81         | -0.26       |
| <b>50019.00 E13</b> | <b>M-013021- keratin 6</b> | <b>140446.00</b> | <b>KRT6C</b> | <b>3746.00</b> | <b>13.13</b> | <b>8.13</b>  | <b>2.58</b> |
| 50019.00 E14        | M-017837- tropomy          | 7168.00          | TPM1         | 2581.00        | 6.59         | 1.59         | 0.50        |
| 50019.00 E15        | M-019277- keratin 7        | 3855.00          | KRT7         | 5110.00        | 2.99         | 2.01         | -0.64       |



|                     |                           |                      |                |              |             |             |
|---------------------|---------------------------|----------------------|----------------|--------------|-------------|-------------|
| 50019.00 E16        | M-017834- thrombo         | 7060.00 THBS4        | 2391.00        | 5.31         | 0.31        | 0.10        |
| 50019.00 E17        | M-019658- keratin 8       | 3856.00 KRT8         | 3734.00        | 2.46         | 2.54        | -0.81       |
| 50019.00 E18        | M-019745- thrombo         | 7058.00 THBS2        | 4176.00        | 7.81         | 2.81        | 0.89        |
| 50019.00 E19        | M-011312- keratin 3       | 3886.00 KRT35        | 3109.00        | 2.96         | 2.04        | -0.65       |
| 50019.00 E20        | M-012654- statherin       | 6779.00 STATH        | 3834.00        | 3.76         | 1.24        | -0.40       |
| 50019.00 E21        | M-011513- keratin 3       | 8689.00 KRT36        | 3894.00        | 9.42         | 4.42        | 1.40        |
| 50019.00 E23        | M-004254- ligase IV,      | 3981.00 LIG4         | 2679.00        | 3.77         | 1.23        | -0.39       |
| 50019.00 F02        | M-006509- transient       | 7222.00 TRPC3        | 1908.00        | 4.19         | 0.81        | -0.26       |
| 50019.00 F04        | M-004191- transient       | 7220.00 TRPC1        | 1709.00        | 10.06        | 5.06        | 1.60        |
| 50019.00 F05        | M-012878- vacuolar        | 23230.00 VPS13A      | 3208.00        | 2.24         | 2.76        | -0.88       |
| 50019.00 F06        | M-006508- two pore        | 219931.00 TPCN2      | 4359.00        | 10.76        | 5.76        | 1.83        |
| <b>50019.00 F07</b> | <b>M-003813- chloride</b> | <b>9635.00 CLCA2</b> | <b>3780.00</b> | <b>11.88</b> | <b>6.88</b> | <b>2.18</b> |
| 50019.00 F08        | M-003911- target of       | 10040.00 TOM1L1      | 3368.00        | 5.97         | 0.97        | 0.31        |
| 50019.00 F09        | M-006149- chloride        | 1180.00 CLCN1        | 3005.00        | 4.66         | 0.34        | -0.11       |
| 50019.00 F10        | M-010342- transloca       | 1678.00 TIMM8A       | 5386.00        | 3.73         | 1.27        | -0.40       |
| 50019.00 F11        | M-006150- chloride        | 1181.00 CLCN2        | 3196.00        | 7.95         | 2.95        | 0.93        |
| 50019.00 F12        | M-012550- Treacher        | 6949.00 TCOF1        | 2131.00        | 2.44         | 2.56        | -0.81       |
| 50019.00 F13        | M-006153- chloride        | 1184.00 CLCN5        | 3372.00        | 7.15         | 2.15        | 0.68        |
| 50019.00 F14        | M-012198- T-cell, im      | 10312.00 TCIRG1      | 2463.00        | 7.51         | 2.51        | 0.80        |
| 50019.00 F15        | M-006155- chloride        | 1186.00 CLCN7        | 2694.00        | 7.31         | 2.31        | 0.73        |
| 50019.00 F16        | M-012677- syntaxin        | 6804.00 STX1A        | 5760.00        | 8.40         | 3.40        | 1.08        |
| 50019.00 F17        | M-006156- chloride        | 1187.00 CLCNKA       | 3879.00        | 4.51         | 0.49        | -0.16       |
| 50019.00 F18        | M-007439- solute ca       | 6579.00 SLCO1A2      | 3311.00        | 5.89         | 0.89        | 0.28        |
| 50019.00 F19        | M-013553- chloride        | 25932.00 CLIC4       | 3854.00        | 6.49         | 1.49        | 0.47        |
| 50019.00 F20        | M-007619- solute ca       | 11136.00 SLC7A9      | 4436.00        | 8.27         | 3.27        | 1.04        |
| 50019.00 F21        | M-020570- chloride        | 53405.00 CLIC5       | 2986.00        | 3.38         | 1.62        | -0.51       |
| 50019.00 F23        | M-013993- compone         | 25839.00 COG4        | 3048.00        | 8.63         | 3.63        | 1.15        |
| 50019.00 G02        | M-017692- spectrin,       | 6710.00 SPTB         | 3635.00        | 3.88         | 1.12        | -0.36       |
| 50019.00 G04        | M-017440- smoothe         | 6525.00 SMTN         | 2790.00        | 5.38         | 0.38        | 0.12        |
| 50019.00 G05        | M-005290- lamin B2        | 84823.00 LMNB2       | 3234.00        | 5.41         | 0.41        | 0.13        |
| 50019.00 G06        | M-012600- slit homc       | 6586.00 SLIT3        | 4173.00        | 4.82         | 0.18        | -0.06       |
| 50019.00 G07        | M-011077- lorocrin        | 4014.00 LOR          | 2945.00        | 4.21         | 0.79        | -0.25       |
| 50019.00 G08        | M-015415- sorbin ar       | 10174.00 SORBS3      | 4892.00        | 5.68         | 0.68        | 0.22        |
| 50019.00 G09        | M-013482- microtub        | 4130.00 MAP1A        | 3822.00        | 2.64         | 2.36        | -0.75       |
| 50019.00 G10        | M-010498- ribosoma        | 6193.00 RPS5         | 1533.00        | 5.48         | 0.48        | 0.15        |
| 50019.00 G11        | M-010348- microtub        | 4131.00 MAP1B        | 5036.00        | 6.75         | 1.75        | 0.55        |
| 50019.00 G12        | M-013607- ribosoma        | 6188.00 RPS3         | 1330.00        | 4.59         | 0.41        | -0.13       |
| <b>50019.00 G13</b> | <b>M-011563- microtub</b> | <b>9053.00 MAP7</b>  | <b>4971.00</b> | <b>10.86</b> | <b>5.86</b> | <b>1.86</b> |
| 50019.00 G14        | M-011153- ribosoma        | 6227.00 RPS21        | 1385.00        | 6.50         | 1.50        | 0.47        |
| 50019.00 G15        | M-012488- microtub        | 4137.00 MAPT         | 3244.00        | 7.74         | 2.74        | 0.87        |
| 50019.00 G16        | M-013690- ribosoma        | 6187.00 RPS2         | 1615.00        | 4.58         | 0.42        | -0.13       |
| 50019.00 G17        | M-003685- matrilin 3      | 4148.00 MATN3        | 4370.00        | 8.08         | 3.08        | 0.97        |
| 50019.00 G18        | M-011762- radixin         | 5962.00 RDX          | 5678.00        | 5.64         | 0.64        | 0.20        |
| 50019.00 G19        | M-019663- myelin b        | 4155.00 MBP          | 5089.00        | 5.03         | 0.03        | 0.01        |
| 50019.00 G20        | M-003945- plectin 1,      | 5339.00 PLEC1        | 3521.00        | 4.91         | 0.09        | -0.03       |
| 50019.00 G21        | M-012179- major int       | 4284.00 MIP          | 3925.00        | 9.94         | 4.94        | 1.56        |
| 50019.00 G23        | M-015424- myelin pi       | 4359.00 MPZ          | 4315.00        | 3.82         | 1.18        | -0.37       |

|              |                      |                   |         |       |       |       |
|--------------|----------------------|-------------------|---------|-------|-------|-------|
| 50019.00 H02 | M-007617- solute ca  | 9056.00 SLC7A7    | 3170.00 | 10.79 | 5.79  | 1.83  |
| 50019.00 H04 | M-007608- solute ca  | 6535.00 SLC6A8    | 4116.00 | 22.50 | 17.50 | 5.55  |
| 50019.00 H05 | M-012525- copine V   | 27132.00 CPNE7    | 3572.00 | 6.55  | 1.55  | 0.49  |
| 50019.00 H06 | M-007604- solute ca  | 6532.00 SLC6A4    | 3251.00 | 19.59 | 14.59 | 4.63  |
| 50019.00 H07 | M-019914- cystinosi: | 1497.00 CTNS      | 4146.00 | 11.53 | 6.53  | 2.07  |
| 50019.00 H08 | M-007602- solute ca  | 6530.00 SLC6A2    | 4579.00 | 8.58  | 3.58  | 1.14  |
| 50019.00 H09 | M-007875- chemokii   | 9547.00 CXCL14    | 6006.00 | 9.84  | 4.84  | 1.53  |
| 50019.00 H10 | M-007593- solute ca  | 6528.00 SLC5A5    | 2349.00 | 4.64  | 0.36  | -0.12 |
| 50019.00 H11 | M-021379- syntaxin   | 2054.00 STX2      | 3814.00 | 11.20 | 6.20  | 1.96  |
| 50019.00 H12 | M-007590- solute ca  | 6524.00 SLC5A2    | 2904.00 | 10.40 | 5.40  | 1.71  |
| 50019.00 H13 | M-011029- electron-  | 2108.00 ETFA      | 3403.00 | 5.52  | 0.52  | 0.17  |
| 50019.00 H14 | M-007589- solute ca  | 6523.00 SLC5A1    | 2758.00 | 1.20  | 3.80  | -1.21 |
| 50019.00 H15 | M-010494- electron-  | 2109.00 ETFB      | 5150.00 | 14.87 | 9.87  | 3.13  |
| 50019.00 H16 | M-007584- solute ca  | 8671.00 SLC4A4    | 3099.00 | 6.16  | 1.16  | 0.37  |
| 50019.00 H17 | M-011977- FXYD dor   | 5348.00 FXYD1     | 4792.00 | 9.18  | 4.18  | 1.33  |
| 50019.00 H18 | M-007583- solute ca  | 6508.00 SLC4A3    | 2972.00 | 8.34  | 3.34  | 1.06  |
| 50019.00 H19 | M-006853- GABA(A)    | 11345.00 GABARAPL | 1665.00 | 8.23  | 3.23  | 1.02  |
| 50019.00 H20 | M-007579- solute ca  | 6521.00 SLC4A1    | 5055.00 | 14.72 | 9.72  | 3.08  |
| 50019.00 H21 | M-011669- gap junct  | 2701.00 GJA4      | 4980.00 | 19.46 | 14.46 | 4.58  |
| 50019.00 H23 | M-019941- gap junct  | 10052.00 GJA7     | 3129.00 | 6.90  | 1.90  | 0.60  |
| 50019.00 I02 | M-011487- plakophil  | 8502.00 PKP4      | 2093.00 | 2.10  | 2.90  | -0.92 |
| 50019.00 I04 | M-019664- plakophil  | 11187.00 PKP3     | 3265.00 | 4.47  | 0.53  | -0.17 |
| 50019.00 I05 | M-013557- mitochor   | 28998.00 MRPL13   | 2907.00 | 3.37  | 1.63  | -0.52 |
| 50019.00 I06 | M-012692- plakophil  | 5318.00 PKP2      | 1897.00 | 3.95  | 1.05  | -0.33 |
| 50019.00 I07 | M-017627- mitochor   | 10573.00 MRPL28   | 2290.00 | 5.07  | 0.07  | 0.02  |
| 50019.00 I08 | M-012545- plakophil  | 5317.00 PKP1      | 2009.00 | 3.78  | 1.22  | -0.39 |
| 50019.00 I09 | M-013512- mitochor   | 64983.00 MRPL32   | 1672.00 | 4.31  | 0.69  | -0.22 |
| 50019.00 I10 | M-012888- nephroni   | 261734.00 NPHP4   | 1971.00 | 13.14 | 8.14  | 2.58  |
| 50019.00 I11 | M-013623- mitochor   | 64963.00 MRPS11   | 2013.00 | 2.53  | 2.47  | -0.78 |
| 50019.00 I12 | M-011094- nephroni   | 4867.00 NPHP1     | 2368.00 | 6.12  | 1.12  | 0.35  |
| 50019.00 I13 | M-011946- netrin 1   | 9423.00 NTN1      | 1088.00 | 5.97  | 0.97  | 0.31  |
| 50019.00 I14 | M-019674- nidogen    | 4811.00 NID1      | 2679.00 | 5.79  | 0.79  | 0.25  |
| 50019.00 I15 | M-020117- netrin 2-  | 4917.00 NTN2L     | 1330.00 | 1.95  | 3.05  | -0.97 |
| 50019.00 I16 | M-019900- NHP2 no    | 4809.00 NHP2L1    | 394.00  | 13.71 | 8.71  | 2.76  |
| 50019.00 I17 | M-031987- netrin 4   | 59277.00 NTN4     | 3886.00 | 5.89  | 0.89  | 0.28  |
| 50019.00 I18 | M-003917- neurofibi  | 4771.00 NF2       | 2311.00 | 3.29  | 1.71  | -0.54 |
| 50019.00 I19 | M-005272- nuclear r  | 4926.00 NUMA1     | 2059.00 | 2.72  | 2.28  | -0.72 |
| 50019.00 I20 | M-019165- neurofila  | 4744.00 NEFH      | 2775.00 | 5.23  | 0.23  | 0.07  |
| 50019.00 I21 | M-019228- pinin, de  | 5411.00 PNN       | 2123.00 | 9.47  | 4.47  | 1.42  |
| 50019.00 I23 | M-011496- titin-cap  | 8557.00 TCAP      | 1145.00 | 3.06  | 1.94  | -0.62 |
| 50019.00 J02 | M-006343- solute ca  | 55630.00 SLC39A4  | 3883.00 | 3.81  | 1.19  | -0.38 |
| 50019.00 J04 | M-007524- solute ca  | 7781.00 SLC30A3   | 3594.00 | 11.71 | 6.71  | 2.13  |
| 50019.00 J05 | M-017887- gap junct  | 2705.00 GJB1      | 3208.00 | 4.40  | 0.60  | -0.19 |
| 50019.00 J06 | M-007521- solute ca  | 56606.00 SLC2A9   | 3122.00 | 2.18  | 2.82  | -0.90 |
| 50019.00 J07 | M-019285- gap junct  | 2706.00 GJB2      | 4004.00 | 6.32  | 1.32  | 0.42  |
| 50019.00 J08 | M-007520- solute ca  | 29988.00 SLC2A8   | 2977.00 | 4.74  | 0.26  | -0.08 |
| 50019.00 J09 | M-019948- gap junct  | 2707.00 GJB3      | 3225.00 | 4.37  | 0.63  | -0.20 |

|              |                      |           |          |         |       |       |       |
|--------------|----------------------|-----------|----------|---------|-------|-------|-------|
| 50019.00 J10 | M-007518- solute ca  | 6518.00   | SLC2A5   | 3175.00 | 16.32 | 11.32 | 3.59  |
| 50019.00 J11 | M-016916- gap junct  | 127534.00 | GJB4     | 3321.00 | 16.83 | 11.83 | 3.75  |
| 50019.00 J12 | M-007517- solute ca  | 6517.00   | SLC2A4   | 2960.00 | 7.30  | 2.30  | 0.73  |
| 50019.00 J13 | M-017789- gap junct  | 2709.00   | GJB5     | 1610.00 | 4.29  | 0.71  | -0.23 |
| 50019.00 J14 | M-007516- solute ca  | 6515.00   | SLC2A3   | 3309.00 | 2.93  | 2.07  | -0.66 |
| 50019.00 J15 | M-019916- gap junct  | 10804.00  | GJB6     | 3537.00 | 8.00  | 3.00  | 0.95  |
| 50019.00 J16 | M-007515- solute ca  | 6514.00   | SLC2A2   | 3044.00 | 13.54 | 8.54  | 2.71  |
| 50019.00 J17 | M-011047- hemoglo    | 3043.00   | HBB      | 4446.00 | 5.62  | 0.62  | 0.20  |
| 50019.00 J18 | M-007509- solute ca  | 6513.00   | SLC2A1   | 5022.00 | 18.26 | 13.26 | 4.20  |
| 50019.00 J19 | M-011115- hemoglo    | 3047.00   | HBG1     | 4265.00 | 7.20  | 2.20  | 0.70  |
| 50019.00 J20 | M-007493- solute ca  | 5172.00   | SLC26A4  | 5263.00 | 7.49  | 2.49  | 0.79  |
| 50019.00 J21 | M-006210- potassiu   | 3736.00   | KCNA1    | 5478.00 | 10.19 | 5.19  | 1.64  |
| 50019.00 J23 | M-006213- potassiu   | 3738.00   | KCNA3    | 3952.00 | 5.42  | 0.42  | 0.13  |
| 50019.00 K02 | M-011882- nebulin    | 4703.00   | NEB      | 3234.00 | 1.95  | 3.05  | -0.97 |
| 50019.00 K04 | M-011738- myosin, l  | 4635.00   | MYL4     | 2877.00 | 4.45  | 0.55  | -0.18 |
| 50019.00 K05 | M-012065- tectorin ; | 7007.00   | TECTA    | 5523.00 | 5.20  | 0.20  | 0.06  |
| 50019.00 K06 | M-011085- myosin b   | 4607.00   | MYBPC3   | 4579.00 | 2.58  | 2.42  | -0.77 |
| 50019.00 K07 | M-011794- ubiquitin  | 7311.00   | UBA52    | 1115.00 | 8.25  | 3.25  | 1.03  |
| 50019.00 K08 | M-017264- mitochor   | 65008.00  | MRPL1    | 3414.00 | 8.00  | 3.00  | 0.95  |
| 50019.00 K09 | M-012381- Usher sy   | 7399.00   | USH2A    | 3350.00 | 9.70  | 4.70  | 1.49  |
| 50019.00 K10 | M-009770- matrix Gl  | 4256.00   | MGP      | 1500.00 | 6.53  | 1.53  | 0.49  |
| 50019.00 K11 | M-009288- vinculin   | 7414.00   | VCL      | 3464.00 | 4.24  | 0.76  | -0.24 |
| 50019.00 K12 | M-017382- matrin 3   | 9782.00   | MATR3    | 3685.00 | 6.32  | 1.32  | 0.42  |
| 50019.00 K13 | M-011195- actinin, a | 87.00     | ACTN1    | 2957.00 | 4.57  | 0.43  | -0.14 |
| 50019.00 K14 | M-011328- matrilin : | 4146.00   | MATN1    | 1952.00 | 2.56  | 2.44  | -0.77 |
| 50019.00 K15 | M-011196- actinin, a | 88.00     | ACTN2    | 2852.00 | 16.73 | 11.73 | 3.72  |
| 50019.00 K16 | M-007299- microtub   | 4133.00   | MAP2     | 2761.00 | 3.98  | 1.02  | -0.32 |
| 50019.00 K17 | M-011197- actinin, a | 89.00     | ACTN3    | 3488.00 | 3.56  | 1.45  | -0.46 |
| 50019.00 K18 | M-016684- lumican    | 4060.00   | LUM      | 2525.00 | 2.42  | 2.58  | -0.82 |
| 50019.00 K19 | M-011988- actinin, a | 81.00     | ACTN4    | 2700.00 | 9.67  | 4.67  | 1.48  |
| 50019.00 K20 | M-004978- lamin A/i  | 4000.00   | LMNA     | 2186.00 | 8.28  | 3.28  | 1.04  |
| 50019.00 K21 | M-009487- adducin :  | 118.00    | ADD1     | 2037.00 | 4.03  | 0.97  | -0.31 |
| 50019.00 K23 | M-008468- adducin :  | 120.00    | ADD3     | 2681.00 | 5.74  | 0.74  | 0.23  |
| 50019.00 L02 | M-007491- solute ca  | 1836.00   | SLC26A2  | 4983.00 | 2.39  | 2.61  | -0.83 |
| 50019.00 L04 | M-007456- solute ca  | 6584.00   | SLC22A5  | 3816.00 | 4.19  | 0.81  | -0.26 |
| 50019.00 L05 | M-009368- potassiu   | 8514.00   | KCNAB2   | 4427.00 | 6.03  | 1.03  | 0.33  |
| 50019.00 L06 | M-007446- solute ca  | 116085.00 | SLC22A12 | 4161.00 | 3.85  | 1.15  | -0.37 |
| 50019.00 L07 | M-008846- potassiu   | 9196.00   | KCNAB3   | 3961.00 | 3.28  | 1.72  | -0.55 |
| 50019.00 L08 | M-007425- solute ca  | 6505.00   | SLC1A1   | 3197.00 | 2.03  | 2.97  | -0.94 |
| 50019.00 L09 | M-006224- potassiu   | 3750.00   | KCND1    | 4023.00 | 2.19  | 2.81  | -0.89 |
| 50019.00 L10 | M-007415- solute ca  | 26503.00  | SLC17A5  | 3417.00 | 10.39 | 5.39  | 1.71  |
| 50019.00 L11 | M-006225- potassiu   | 3751.00   | KCND2    | 2780.00 | 3.99  | 1.01  | -0.32 |
| 50019.00 L12 | M-007402- solute ca  | 6566.00   | SLC16A1  | 2314.00 | 2.03  | 2.97  | -0.94 |
| 50019.00 L13 | M-006226- potassiu   | 3752.00   | KCND3    | 3315.00 | 4.68  | 0.32  | -0.10 |
| 50019.00 L14 | M-007397- solute ca  | 8170.00   | SLC14A2  | 2172.00 | 3.04  | 1.96  | -0.62 |
| 50019.00 L15 | M-009044- potassiu   | 3753.00   | KCNE1    | 2979.00 | 5.10  | 0.10  | 0.03  |
| 50019.00 L16 | M-007396- solute ca  | 6563.00   | SLC14A1  | 1816.00 | 1.27  | 3.73  | -1.19 |

|                     |                            |                |              |                |              |              |             |
|---------------------|----------------------------|----------------|--------------|----------------|--------------|--------------|-------------|
| 50019.00 L17        | M-017528- potassiu         | 10008.00       | KCNE3        | 4270.00        | 10.16        | 5.16         | 1.64        |
| 50019.00 L18        | M-007387- solute ca        | 9990.00        | SLC12A6      | 2952.00        | 5.76         | 0.76         | 0.24        |
| 50019.00 L19        | M-006236- potassiu         | 81033.00       | KCNH6        | 1458.00        | 7.82         | 2.82         | 0.89        |
| 50019.00 L20        | M-007383- solute ca        | 6558.00        | SLC12A2      | 2633.00        | 3.91         | 1.09         | -0.35       |
| 50019.00 L21        | M-006241- potassiu         | 3767.00        | KCNJ11       | 3080.00        | 3.99         | 1.01         | -0.32       |
| 50019.00 L23        | M-006247- potassiu         | 3759.00        | KCNJ2        | 2822.00        | 5.42         | 0.42         | 0.13        |
| 50019.00 M02        | M-011877- lethal gia       | 3996.00        | LLGL1        | 3654.00        | 1.86         | 3.14         | -1.00       |
| 50019.00 M04        | M-012173- laminin, j       | 10319.00       | LAMC3        | 3467.00        | 3.06         | 1.94         | -0.62       |
| 50019.00 M05        | M-020372- ARP3 act         | 57180.00       | ACTR3B       | 4447.00        | 7.71         | 2.71         | 0.86        |
| 50019.00 M06        | M-012119- laminin, j       | 3918.00        | LAMC2        | 2776.00        | 3.21         | 1.79         | -0.57       |
| <b>50019.00 M07</b> | <b>M-011586- armadillc</b> | <b>421.00</b>  | <b>ARVCF</b> | <b>6524.00</b> | <b>14.44</b> | <b>9.44</b>  | <b>2.99</b> |
| 50019.00 M08        | M-011714- laminin, j       | 3915.00        | LAMC1        | 3555.00        | 10.86        | 5.86         | 1.86        |
| 50019.00 M09        | M-010948- contactir        | 79937.00       | CNTNAP3      | 3701.00        | 9.13         | 4.13         | 1.31        |
| 50019.00 M10        | M-011072- laminin, l       | 3914.00        | LAMB3        | 3889.00        | 11.08        | 6.08         | 1.93        |
| <b>50019.00 M11</b> | <b>M-011607- septin 7</b>  | <b>989.00</b>  | <b>SEPT7</b> | <b>2844.00</b> | <b>13.36</b> | <b>8.36</b>  | <b>2.65</b> |
| 50019.00 M12        | M-013310- laminin, l       | 3913.00        | LAMB2        | 2961.00        | 3.34         | 1.66         | -0.53       |
| 50019.00 M13        | M-017329- contactir        | 26047.00       | CNTNAP2      | 3590.00        | 4.37         | 0.63         | -0.20       |
| 50019.00 M14        | M-011713- laminin, l       | 3912.00        | LAMB1        | 3336.00        | 7.49         | 2.49         | 0.79        |
| 50019.00 M15        | M-011614- collagen,        | 1301.00        | COL11A1      | 2294.00        | 2.92         | 2.08         | -0.66       |
| 50019.00 M16        | M-011071- laminin, i       | 3909.00        | LAMA3        | 2883.00        | 6.59         | 1.59         | 0.50        |
| 50019.00 M17        | M-025907- collagen,        | 7373.00        | COL14A1      | 2941.00        | 9.25         | 4.25         | 1.35        |
| 50019.00 M18        | M-012118- laminin, i       | 284217.00      | LAMA1        | 4213.00        | 10.52        | 5.52         | 1.75        |
| 50019.00 M19        | M-012915- collagen,        | 80781.00       | COL18A1      | 4198.00        | 8.58         | 3.58         | 1.13        |
| <b>50019.00 M20</b> | <b>M-009853- fibronect</b> | <b>2335.00</b> | <b>FN1</b>   | <b>4613.00</b> | <b>15.50</b> | <b>10.50</b> | <b>3.33</b> |
| 50019.00 M21        | M-011617- collagen,        | 1310.00        | COL19A1      | 4659.00        | 15.69        | 10.69        | 3.39        |
| 50019.00 M23        | M-011619- collagen,        | 1288.00        | COL4A6       | 3868.00        | 10.45        | 5.45         | 1.73        |
| 50019.00 N02        | M-007382- solute ca        | 6557.00        | SLC12A1      | 2429.00        | 8.52         | 3.52         | 1.12        |
| 50019.00 N04        | M-007381- solute ca        | 4891.00        | SLC11A2      | 3938.00        | 8.25         | 3.25         | 1.03        |
| 50019.00 N05        | M-006252- potassiu         | 3764.00        | KCNJ8        | 1891.00        | 2.75         | 2.25         | -0.72       |
| 50019.00 N06        | M-007380- solute ca        | 6556.00        | SLC11A1      | 2732.00        | 4.28         | 0.72         | -0.23       |
| 50019.00 N07        | M-006257- potassiu         | 56659.00       | KCNK13       | 1917.00        | 2.61         | 2.39         | -0.76       |
| 50019.00 N08        | M-007377- solute ca        | 6555.00        | SLC10A2      | 2344.00        | 4.56         | 0.44         | -0.14       |
| 50019.00 N09        | M-006262- potassiu         | 3777.00        | KCNK3        | 3376.00        | 5.98         | 0.98         | 0.31        |
| 50019.00 N10        | M-007376- solute ca        | 6554.00        | SLC10A1      | 2050.00        | 4.83         | 0.17         | -0.06       |
| 50019.00 N11        | M-004891- potassiu         | 51305.00       | KCNK9        | 1858.00        | 5.33         | 0.33         | 0.10        |
| 50019.00 N12        | M-006507- sodium c         | 6340.00        | SCNN1G       | 2519.00        | 3.57         | 1.43         | -0.45       |
| 50019.00 N13        | M-006271- potassiu         | 3784.00        | KCNQ1        | 2581.00        | 1.94         | 3.06         | -0.97       |
| 50019.00 N14        | M-006505- sodium c         | 6338.00        | SCNN1B       | 2639.00        | 3.22         | 1.78         | -0.57       |
| 50019.00 N15        | M-006272- potassiu         | 3785.00        | KCNQ2        | 1745.00        | 2.64         | 2.36         | -0.75       |
| 50019.00 N16        | M-006504- sodium c         | 6337.00        | SCNN1A       | 4207.00        | 5.73         | 0.73         | 0.23        |
| 50019.00 N17        | M-006273- potassiu         | 3786.00        | KCNQ3        | 3694.00        | 3.30         | 1.70         | -0.54       |
| 50019.00 N18        | M-006500- sodium c         | 6331.00        | SCN5A        | 3276.00        | 1.40         | 3.60         | -1.14       |
| 50019.00 N19        | M-006274- potassiu         | 9132.00        | KCNQ4        | 3410.00        | 2.84         | 2.16         | -0.68       |
| 50019.00 N20        | M-006300- sodium c         | 6329.00        | SCN4A        | 3625.00        | 3.09         | 1.91         | -0.61       |
| 50019.00 N21        | M-010698- potassiu         | 3788.00        | KCNS2        | 5930.00        | 4.69         | 0.31         | -0.10       |
| 50019.00 N23        | M-010714- potassiu         | 57582.00       | KCNT1        | 2889.00        | 2.08         | 2.92         | -0.93       |
| 50019.00 O02        | M-011656- fibrillin 2      | 2201.00        | FBN2         | 1813.00        | 4.80         | 0.20         | -0.07       |

|              |                         |                 |         |       |       |         |
|--------------|-------------------------|-----------------|---------|-------|-------|---------|
| 50019.00 O04 | M-011034- fibrillin 1   | 2200.00 FBN1    | 2917.00 | 12.10 | 7.10  | 2.25    |
| 50019.00 O05 | M-011015- collagen,     | 1289.00 COL5A1  | 1922.00 | 1.77  | 3.23  | -1.03   |
| 50019.00 O06 | M-019186- fibulin 1     | 2192.00 FBLN1   | 3357.00 | 18.05 | 13.05 | 4.14    |
| 50019.00 O07 | M-011620- collagen,     | 1291.00 COL6A1  | 2517.00 | 9.89  | 4.89  | 1.55    |
| 50019.00 O08 | M-013149- Finkel-Bi:    | 2197.00 FAU     | 884.00  | 13.24 | 8.24  | 2.61    |
| 50019.00 O09 | M-011621- collagen,     | 1292.00 COL6A2  | 3225.00 | 10.05 | 5.05  | 1.60    |
| 50019.00 O10 | M-011270- FAT tumo      | 2196.00 FAT2    | 2249.00 | 15.61 | 10.61 | 3.36    |
| 50019.00 O11 | M-012020- collagen,     | 1296.00 COL8A2  | 2614.00 | 5.81  | 0.81  | 0.26    |
| 50019.00 O12 | M-010513- FAT tumo      | 2195.00 FAT     | 1776.00 | 4.50  | 0.50  | -0.16   |
| 50019.00 O13 | M-011018- cartilage     | 1311.00 COMP    | 1401.00 | 6.42  | 1.42  | 0.45    |
| 50019.00 O14 | M-003662- erythrocy     | 2038.00 EPB42   | 4116.00 | 7.75  | 2.75  | 0.87    |
| 50019.00 O15 | M-012771- coronin,      | 11151.00 CORO1A | 1974.00 | 6.28  | 1.28  | 0.41    |
| 50019.00 O16 | M-019042- erythrocy     | 2036.00 EPB41L1 | 2304.00 | 8.46  | 3.46  | 1.10    |
| 50019.00 O17 | M-012404- crumbs h      | 23418.00 CRB1   | 2158.00 | 9.18  | 4.18  | 1.32    |
| 50019.00 O18 | M-003660- erythrocy     | 2035.00 EPB41   | 3272.00 | 12.35 | 7.35  | 2.33    |
| 50019.00 O19 | M-019893- catenin (     | 1496.00 CTNNA2  | 3595.00 | 13.16 | 8.16  | 2.59    |
| 50019.00 O20 | M-011642- dystroph      | 1821.00 DRP2    | 3473.00 | 9.21  | 4.21  | 1.34    |
| 50019.00 O21 | M-003611- catenin (     | 1501.00 CTNND2  | 3844.00 | 16.68 | 11.68 | 3.70    |
| 50019.00 O23 | M-011809- dystroph      | 1756.00 DMD     | 2419.00 | 11.53 | 6.53  | 2.07    |
| 50019.00 P02 | M-006299- sodium c      | 6328.00 SCN3A   | 2869.00 | 1.64  | 3.36  | -1.07   |
| 50019.00 P04 | M-006298- sodium c      | 6326.00 SCN2A   | 2749.00 | 1.09  | 3.91  | -1.24   |
| 50019.00 P05 | M-006279- potassiu      | 169522.00 KCNV2 | 2537.00 | 0.79  | 4.21  | -1.34   |
| 50019.00 P06 | M-020909- sodium c      | 6324.00 SCN1B   | 2607.00 | 2.22  | 2.78  | -0.88   |
| 50019.00 P07 | M-017477- karyophe      | 3840.00 KPNA4   | 2246.00 | 5.16  | 0.16  | 0.05    |
| 50019.00 P08 | M-006297- sodium c      | 6323.00 SCN1A   | 1513.00 | 4.43  | 0.57  | -0.18   |
| 50019.00 P09 | M-017295- karyophe      | 23633.00 KPNA6  | 2849.00 | 2.91  | 2.09  | -0.66   |
| 50019.00 P10 | M-013442- secretory     | 10067.00 SCAMP3 | 2158.00 | 3.20  | 1.80  | -0.57   |
| 50019.00 P11 | M-006281- mucolipii     | 57192.00 MCOLN1 | 1448.00 | 2.90  | 2.10  | -0.67   |
| 50019.00 P12 | M-011958- secretory     | 9522.00 SCAMP1  | 1868.00 | 4.82  | 0.18  | -0.06   |
| 50019.00 P13 | M-015371- mucolipii     | 55283.00 MCOLN3 | 1974.00 | 3.60  | 1.40  | -0.45   |
| 50019.00 P14 | M-008895- regulator     | 6248.00 RSC1A1  | 1657.00 | 4.83  | 0.17  | -0.06   |
| 50019.00 P15 | M-012880- megalen       | 23209.00 MLC1   | 1714.00 | 4.26  | 0.74  | -0.24   |
| 50019.00 P16 | M-017729- polymeri      | 5284.00 PIGR    | 1684.00 | 3.15  | 1.85  | -0.59   |
| 50019.00 P17 | M-019027- tumor su      | 7991.00 TUSC3   | 3205.00 | 5.59  | 0.59  | 0.18    |
| 50019.00 P18 | M-012591- peroxiso      | 5194.00 PEX13   | 1513.00 | 5.88  | 0.88  | 0.28    |
| 50019.00 P19 | M-031875- N-ethylr      | 63908.00 NAPB   | 1162.00 | 5.08  | 0.08  | 0.02    |
| 50019.00 P20 | M-017194- NTF2-like     | 29107.00 NXT1   | 2468.00 | 4.13  | 0.87  | -0.28   |
| 50019.00 P21 | M-004529- neutroph      | 4688.00 NCF2    | 2622.00 | 3.89  | 1.11  | -0.35   |
| 50019.00 P23 | M-013078- nucleopc      | 4928.00 NUP98   | 1786.00 | 4.42  | 0.58  | -0.18   |
|              |                         | mdn             |         | 5.00  | 2.13  |         |
|              |                         | 3xMAD           |         |       | 6.39  |         |
|              |                         | MADc            |         |       | 3.15  |         |
|              | 12.50                   |                 |         |       |       |         |
| 50019.00 C22 | 10 of 40 are SLC family |                 | 4368.00 | 30.88 |       | 2684.00 |
| 50019.00 D22 |                         |                 | 4290.00 | 34.36 |       |         |
| 50019.00 E22 |                         |                 | 2782.00 | 25.13 |       | 3170.00 |
| 50019.00 F22 |                         |                 | 4389.00 | 45.20 |       | 3633.00 |

|              |           |                       |                   |                |              |                |
|--------------|-----------|-----------------------|-------------------|----------------|--------------|----------------|
|              |           |                       | <b>mn</b>         | <b>3957.25</b> | <b>33.89</b> | <b>3162.33</b> |
|              |           |                       | sd                |                | 8.45         |                |
| 50019.00 G22 |           |                       |                   | 2909.00        | 6.50         |                |
| 50019.00 H22 | 784.66    | 8.45                  |                   | 2528.00        | 7.79         | 2186.00        |
| 50019.00 I22 | 474.55    | 1.75                  |                   | 1256.00        | 2.95         | 1225.00        |
| 50019.00 J22 | 778.00    | 3.60                  |                   | 1746.00        | 8.08         | 1191.00        |
|              | 3787.00   | 36.34                 | <b>mn</b>         | <b>2109.75</b> | <b>6.33</b>  | <b>1534.00</b> |
|              |           |                       | sd                | 747.20         | 2.36         | 564.90         |
|              |           |                       | 3psSD             |                | 25.34        |                |
|              |           |                       | 3ngSD             |                | 7.07         |                |
|              |           |                       | Sum3SD            |                | 32.41        |                |
|              |           |                       | MeanDiff          |                | 27.57        |                |
|              |           |                       | SumovrMn          |                | 1.18         |                |
|              |           |                       | <b>1minus</b>     |                | <b>-0.18</b> |                |
| 50019.00 I03 | D-001206- | siControl non-targeti |                   | 1983.00        | 7.92         | 2205.00        |
| 50019.00 J03 | D-001206- | siControl non-targeti |                   | 2180.00        | 4.22         | 2709.00        |
| 50019.00 K03 | D-001600- | siGLO RISC-free siRN. |                   | 6484.00        | 8.54         | 6429.00        |
| 50019.00 L03 | D-001600- | siGLO RISC-free siRN. |                   | 6750.00        | 7.38         | 3919.00        |
| 50019.00 H03 | M-003290- | polo-like             | 5347.00 PLK1 SMAF | 204.00         | 28.43        | 244.00         |
| 50019.00 G03 | M-003290- | polo-like             | 5347.00 PLK1 SMAF | 288.00         | 7.29         | 200.00         |

| Cell Count | % inf | Abs Dev | rZ    | Cell Count | % inf | Abs Dev | rZ    |
|------------|-------|---------|-------|------------|-------|---------|-------|
| 2332.00    | 3.34  | 1.44    | -0.18 | 2744.00    | 0.80  | 4.62    | -1.31 |
| 2607.00    | 1.53  | 0.64    | -0.96 | 3503.00    | 4.05  | 1.37    | -0.39 |
| 2248.00    | 2.89  | 1.20    | -0.37 | 2665.00    | 0.64  | 4.78    | -1.36 |
| 2075.00    | 4.82  | 2.01    | 0.46  | 3375.00    | 3.32  | 2.10    | -0.60 |
| 1827.00    | 6.19  | 2.58    | 1.05  | 5136.00    | 4.61  | 0.81    | -0.23 |
| 2777.00    | 2.09  | 0.87    | -0.72 | 5145.00    | 2.99  | 2.43    | -0.69 |
| 4024.00    | 9.05  | 3.77    | 2.28  | 3821.00    | 2.33  | 3.09    | -0.88 |
| 1677.00    | 2.68  | 1.12    | -0.46 | 2818.00    | 1.21  | 4.21    | -1.20 |
| 937.00     | 4.38  | 1.82    | 0.27  | 1489.00    | 2.62  | 2.80    | -0.79 |
| 2165.00    | 8.64  | 3.60    | 2.11  | 3272.00    | 2.38  | 3.04    | -0.86 |
| 1951.00    | 4.77  | 1.99    | 0.44  | 2960.00    | 1.89  | 3.53    | -1.00 |
| 2971.00    | 2.42  | 1.01    | -0.58 | 3020.00    | 1.49  | 3.93    | -1.11 |
| 1889.00    | 5.61  | 2.34    | 0.80  | 3330.00    | 4.59  | 0.83    | -0.23 |
| 1574.00    | 4.96  | 2.06    | 0.52  | 2679.00    | 1.01  | 4.41    | -1.25 |
| 1708.00    | 2.87  | 1.20    | -0.38 | 2402.00    | 2.16  | 3.26    | -0.92 |
| 2919.00    | 5.34  | 2.23    | 0.69  | 4303.00    | 6.79  | 1.37    | 0.39  |
| 1529.00    | 2.09  | 0.87    | -0.72 | 3750.00    | 1.07  | 4.35    | -1.24 |
| 2852.00    | 2.98  | 1.24    | -0.33 | 2757.00    | 3.16  | 2.26    | -0.64 |
| 2732.00    | 3.84  | 1.60    | 0.04  | 2576.00    | 4.04  | 1.38    | -0.39 |
| 2093.00    | 3.06  | 1.27    | -0.30 | 2425.00    | 3.22  | 2.20    | -0.63 |
| 2794.00    | 3.69  | 1.54    | -0.03 | 3347.00    | 2.51  | 2.91    | -0.83 |
| 2135.00    | 2.39  | 1.00    | -0.59 | 4543.00    | 3.52  | 1.90    | -0.54 |
| 2018.00    | 2.18  | 0.91    | -0.68 | 3290.00    | 0.94  | 4.48    | -1.27 |
| 2601.00    | 2.61  | 1.09    | -0.49 | 3534.00    | 3.28  | 2.14    | -0.61 |
| 2362.00    | 2.96  | 1.23    | -0.34 | 4582.00    | 2.20  | 3.22    | -0.91 |
| 1339.00    | 3.96  | 1.65    | 0.09  | 3992.00    | 4.48  | 0.94    | -0.27 |
| 2680.00    | 3.28  | 1.37    | -0.20 | 4718.00    | 3.52  | 1.90    | -0.54 |
| 1956.00    | 3.53  | 1.47    | -0.10 | 3350.00    | 2.24  | 3.18    | -0.90 |
| 1489.00    | 3.96  | 1.65    | 0.09  | 2935.00    | 1.09  | 4.33    | -1.23 |
| 1208.00    | 4.47  | 1.86    | 0.31  | 2174.00    | 2.67  | 2.75    | -0.78 |
| 1950.00    | 5.13  | 2.14    | 0.59  | 2631.00    | 2.24  | 3.18    | -0.90 |
| 2101.00    | 6.33  | 2.64    | 1.11  | 2414.00    | 2.65  | 2.77    | -0.79 |
| 1904.00    | 3.94  | 1.64    | 0.08  | 3921.00    | 3.03  | 2.39    | -0.68 |
| 1534.00    | 8.15  | 3.40    | 1.90  | 4215.00    | 6.50  | 1.08    | 0.31  |
| 2258.00    | 4.21  | 1.75    | 0.19  | 2685.00    | 3.17  | 2.25    | -0.64 |
| 2608.00    | 2.76  | 1.15    | -0.43 | 3722.00    | 3.30  | 2.12    | -0.60 |
| 1871.00    | 3.74  | 1.56    | -0.01 | 3562.00    | 1.82  | 3.60    | -1.02 |
| 2511.00    | 1.83  | 0.76    | -0.83 | 2940.00    | 0.92  | 4.50    | -1.28 |
| 3412.00    | 3.08  | 1.28    | -0.29 | 3424.00    | 1.52  | 3.90    | -1.11 |
| 2983.00    | 1.54  | 0.64    | -0.96 | 3533.00    | 0.96  | 4.46    | -1.26 |
| 3438.00    | 7.68  | 3.20    | 1.69  | 3987.00    | 6.70  | 1.28    | 0.36  |
| 2877.00    | 4.73  | 1.97    | 0.42  | 3149.00    | 5.24  | 0.18    | -0.05 |
| 3126.00    | 4.19  | 1.75    | 0.19  | 4154.00    | 8.93  | 3.51    | 1.00  |
| 1063.00    | 5.27  | 2.20    | 0.65  | 1737.00    | 2.82  | 2.60    | -0.74 |
| 1262.00    | 2.54  | 1.06    | -0.53 | 2841.00    | 4.47  | 0.95    | -0.27 |
| 2410.00    | 1.83  | 0.76    | -0.83 | 4518.00    | 6.66  | 1.24    | 0.35  |



|         |       |      |       |         |       |       |        |
|---------|-------|------|-------|---------|-------|-------|--------|
| 2068.00 | 4.64  | 1.93 | 0.38  | 3276.00 | 11.05 | 5.63  | 1.60   |
| 2292.00 | 3.23  | 1.35 | -0.23 | 4247.00 | 10.17 | 4.75  | 1.35   |
| 1877.00 | 4.48  | 1.86 | 0.31  | 2705.00 | 7.80  | 2.38  | 0.67   |
| 1979.00 | 3.23  | 1.35 | -0.23 | 1746.00 | 3.38  | 2.04  | -0.58  |
| 2403.00 | 2.54  | 1.06 | -0.53 | 2996.00 | 4.84  | 0.58  | -0.17  |
| 1776.00 | 2.25  | 0.94 | -0.65 | 2161.00 | 5.88  | 0.46  | 0.13   |
| 1605.00 | 4.11  | 1.71 | 0.15  | 3595.00 | 6.90  | 1.48  | 0.42   |
| 1375.00 | 2.62  | 1.09 | -0.49 | 2088.00 | 4.60  | 0.82  | -0.23  |
| 2183.00 | 4.03  | 1.68 | 0.12  | 4635.00 | 8.11  | 2.69  | 0.76   |
| 1612.00 | 3.29  | 1.37 | -0.20 | 3526.00 | 7.46  | 2.04  | 0.58   |
| 1783.00 | 2.47  | 1.03 | -0.56 | 2576.00 | 15.64 | 10.22 | 2.90   |
| 2793.00 | 2.61  | 1.09 | -0.49 | 4084.00 | 6.91  | 1.49  | 0.42   |
| 1498.00 | 5.87  | 2.45 | 0.91  | 1978.00 | 7.33  | 1.91  | 0.54   |
| 2739.00 | 3.03  | 1.26 | -0.31 | 3960.00 | 11.92 | 6.50  | 1.84   |
| 2737.00 | 1.57  | 0.65 | -0.94 | 2598.00 | 1.54  | 3.88  | -1.10  |
| 3442.00 | 2.79  | 1.16 | -0.42 | 4093.00 | 2.93  | 2.49  | -0.71  |
| 3149.00 | 5.68  | 2.37 | 0.83  | 3722.00 | 4.41  | 1.01  | -0.29  |
| 2292.00 | 2.36  | 0.98 | -0.60 | 3712.00 | 4.45  | 0.98  | -0.28  |
| 3191.00 | 2.10  | 0.87 | -0.72 | 5090.00 | 4.09  | 1.33  | -0.38  |
| 3295.00 | 3.43  | 1.43 | -0.14 | 4489.00 | 5.70  | 0.28  | 0.08   |
| 2208.00 | 4.76  | 1.98 | 0.43  | 4255.00 | 7.90  | 2.48  | 0.70   |
| 1587.00 | 1.76  | 0.74 | -0.86 | 2256.00 | 3.46  | 1.96  | -0.56  |
| 1137.00 | 6.51  | 2.71 | 1.19  | 665.00  | 7.07  | 1.65  | 0.47   |
| 1653.00 | 3.45  | 1.44 | -0.13 | 1995.00 | 1.35  | 4.07  | -1.15  |
| 2158.00 | 1.48  | 0.62 | -0.98 | 2311.00 | 3.51  | 1.92  | -0.54  |
| 2855.00 | 9.63  | 4.01 | 2.54  | 4140.00 | 5.65  | 0.23  | 0.07   |
| 1485.00 | 7.41  | 3.09 | 1.58  | 2988.00 | 5.22  | 0.20  | -0.06  |
| 3699.00 | 21.36 | 8.90 | 7.60  | 4852.00 | 16.24 | 10.82 | 3.07 y |
| 1956.00 | 2.76  | 1.15 | -0.43 | 2789.00 | 2.87  | 2.55  | -0.72  |
| 3627.00 | 5.16  | 2.15 | 0.60  | 5292.00 | 4.99  | 0.43  | -0.12  |
| 2638.00 | 2.39  | 1.00 | -0.59 | 3323.00 | 3.64  | 1.78  | -0.50  |
| 2922.00 | 2.57  | 1.07 | -0.51 | 4127.00 | 2.69  | 2.73  | -0.77  |
| 4544.00 | 13.42 | 5.59 | 4.17  | 4523.00 | 7.23  | 1.81  | 0.51   |
| 3234.00 | 4.98  | 2.07 | 0.53  | 4393.00 | 7.19  | 1.77  | 0.50   |
| 1333.00 | 0.53  | 0.22 | -1.39 | 1868.00 | 4.50  | 0.92  | -0.26  |
| 3254.00 | 1.78  | 0.74 | -0.85 | 3292.00 | 5.38  | 0.04  | -0.01  |
| 2596.00 | 4.24  | 1.77 | 0.21  | 3522.00 | 12.75 | 7.33  | 2.08   |
| 3079.00 | 3.44  | 1.43 | -0.14 | 3133.00 | 10.57 | 5.15  | 1.46   |
| 2826.00 | 2.05  | 0.86 | -0.74 | 4004.00 | 7.37  | 1.95  | 0.55   |
| 3570.00 | 4.76  | 1.98 | 0.43  | 4504.00 | 14.83 | 9.41  | 2.67 y |
| 2538.00 | 3.19  | 1.33 | -0.24 | 4425.00 | 13.38 | 7.96  | 2.26 y |
| 2566.00 | 6.51  | 2.71 | 1.19  | 4564.00 | 13.32 | 7.90  | 2.24   |
| 1948.00 | 5.49  | 2.29 | 0.75  | 2805.00 | 11.52 | 6.10  | 1.73   |
| 2335.00 | 1.20  | 0.50 | -1.10 | 2250.00 | 3.73  | 1.69  | -0.48  |
| 2581.00 | 12.32 | 5.13 | 3.70  | 3122.00 | 7.14  | 1.72  | 0.49 y |
| 1494.00 | 3.08  | 1.28 | -0.29 | 988.00  | 8.91  | 3.49  | 0.99   |
| 3634.00 | 3.27  | 1.36 | -0.21 | 4355.00 | 3.70  | 1.72  | -0.49  |



|         |       |      |       |         |       |       |       |
|---------|-------|------|-------|---------|-------|-------|-------|
| 2455.00 | 4.36  | 1.82 | 0.26  | 2684.00 | 8.16  | 2.74  | 0.78  |
| 2236.00 | 1.83  | 0.76 | -0.83 | 3571.00 | 3.47  | 1.95  | -0.55 |
| 3139.00 | 5.00  | 2.08 | 0.54  | 3940.00 | 5.23  | 0.19  | -0.05 |
| 1250.00 | 1.52  | 0.63 | -0.97 | 2410.00 | 3.65  | 1.77  | -0.50 |
| 2368.00 | 3.67  | 1.53 | -0.04 | 3820.00 | 4.58  | 0.84  | -0.24 |
| 3397.00 | 10.98 | 4.58 | 3.12  | 3758.00 | 6.57  | 1.15  | 0.33  |
| 1468.00 | 2.04  | 0.85 | -0.74 | 1859.00 | 4.63  | 0.79  | -0.23 |
| 2713.00 | 2.99  | 1.24 | -0.33 | 2641.00 | 5.38  | 0.04  | -0.01 |
| 2225.00 | 5.21  | 2.17 | 0.63  | 2154.00 | 13.23 | 7.81  | 2.21  |
| 4531.00 | 1.35  | 0.56 | -1.04 | 4010.00 | 8.60  | 3.18  | 0.90  |
| 5088.00 | 5.86  | 2.44 | 0.91  | 4934.00 | 12.53 | 7.11  | 2.01  |
| 3160.00 | 5.38  | 2.24 | 0.70  | 3389.00 | 14.72 | 9.30  | 2.64  |
| 3908.00 | 4.30  | 1.79 | 0.23  | 3995.00 | 16.02 | 10.60 | 3.01  |
| 2807.00 | 4.20  | 1.75 | 0.19  | 1962.00 | 8.77  | 3.35  | 0.95  |
| 3879.00 | 2.96  | 1.24 | -0.34 | 4396.00 | 9.71  | 4.29  | 1.22  |
| 1870.00 | 2.14  | 0.89 | -0.70 | 3442.00 | 9.33  | 3.91  | 1.11  |
| 2317.00 | 1.99  | 0.83 | -0.76 | 2080.00 | 6.68  | 1.26  | 0.36  |
| 2307.00 | 2.21  | 0.92 | -0.67 | 2925.00 | 5.78  | 0.36  | 0.10  |
| 1616.00 | 2.35  | 0.98 | -0.61 | 2406.00 | 2.16  | 3.26  | -0.92 |
| 1599.00 | 1.06  | 0.44 | -1.16 | 1766.00 | 4.81  | 0.61  | -0.17 |
| 2867.00 | 2.27  | 0.94 | -0.64 | 3762.00 | 4.60  | 0.82  | -0.23 |
| 3354.00 | 3.19  | 1.33 | -0.24 | 3525.00 | 5.67  | 0.25  | 0.07  |
| 2067.00 | 1.79  | 0.75 | -0.85 | 3603.00 | 12.21 | 6.79  | 1.93  |
| 2267.00 | 2.34  | 0.97 | -0.61 | 3781.00 | 9.55  | 4.13  | 1.17  |
| 4086.00 | 6.75  | 2.81 | 1.29  | 4676.00 | 7.81  | 2.39  | 0.68  |
| 2586.00 | 0.85  | 0.35 | -1.25 | 2763.00 | 5.61  | 0.19  | 0.05  |
| 2434.00 | 2.63  | 1.10 | -0.49 | 3797.00 | 6.72  | 1.30  | 0.37  |
| 4246.00 | 2.61  | 1.09 | -0.49 | 4727.00 | 4.93  | 0.49  | -0.14 |
| 1148.00 | 2.70  | 1.13 | -0.46 | 1168.00 | 2.91  | 2.51  | -0.71 |
| 2667.00 | 2.36  | 0.98 | -0.60 | 2025.00 | 4.15  | 1.27  | -0.36 |
| 3574.00 | 3.61  | 1.50 | -0.06 | 2774.00 | 3.32  | 2.10  | -0.60 |
| 2768.00 | 2.64  | 1.10 | -0.48 | 2511.00 | 4.38  | 1.04  | -0.30 |
| 2328.00 | 2.62  | 1.09 | -0.49 | 2129.00 | 2.91  | 2.51  | -0.71 |
| 1601.00 | 1.75  | 0.73 | -0.87 | 2110.00 | 1.94  | 3.48  | -0.99 |
| 529.00  | 3.59  | 1.50 | -0.07 | 765.00  | 10.20 | 4.78  | 1.35  |
| 3069.00 | 3.55  | 1.48 | -0.09 | 2612.00 | 4.13  | 1.29  | -0.37 |
| 699.00  | 1.14  | 0.48 | -1.13 | 623.00  | 1.61  | 3.81  | -1.08 |
| 4162.00 | 10.62 | 4.43 | 2.96  | 3703.00 | 12.50 | 7.08  | 2.01  |
| 370.00  | 7.57  | 3.15 | 1.65  | 375.00  | 13.07 | 7.65  | 2.17  |
| 1561.00 | 3.46  | 1.44 | -0.13 | 2731.00 | 7.98  | 2.56  | 0.73  |
| 865.00  | 1.27  | 0.53 | -1.07 | 904.00  | 7.52  | 2.10  | 0.60  |
| 2281.00 | 3.77  | 1.57 | 0.01  | 3076.00 | 6.11  | 0.69  | 0.20  |
| 2367.00 | 1.35  | 0.56 | -1.04 | 3515.00 | 2.22  | 3.20  | -0.91 |
| 3238.00 | 3.24  | 1.35 | -0.22 | 3372.00 | 4.89  | 0.53  | -0.15 |
| 1907.00 | 1.00  | 0.42 | -1.19 | 2064.00 | 2.33  | 3.09  | -0.88 |
| 2382.00 | 6.63  | 2.76 | 1.24  | 2876.00 | 4.17  | 1.25  | -0.35 |
| 2267.00 | 1.59  | 0.66 | -0.94 | 3658.00 | 3.85  | 1.57  | -0.44 |

|         |       |      |       |         |       |      |       |   |
|---------|-------|------|-------|---------|-------|------|-------|---|
| 3337.00 | 8.72  | 3.63 | 2.14  | 3290.00 | 7.51  | 2.09 | 0.59  |   |
| 3275.00 | 20.34 | 8.47 | 7.16  | 4310.00 | 14.46 | 9.04 | 2.56  | y |
| 3085.00 | 6.90  | 2.88 | 1.36  | 3527.00 | 6.35  | 0.93 | 0.26  |   |
| 2344.00 | 11.86 | 4.94 | 3.50  | 2983.00 | 10.36 | 4.94 | 1.40  | y |
| 4380.00 | 10.91 | 4.55 | 3.09  | 3925.00 | 6.11  | 0.69 | 0.20  | y |
| 3860.00 | 4.87  | 2.03 | 0.48  | 4124.00 | 5.19  | 0.23 | -0.07 |   |
| 3606.00 | 2.80  | 1.17 | -0.41 | 4370.00 | 3.04  | 2.38 | -0.67 |   |
| 2499.00 | 2.80  | 1.17 | -0.41 | 2681.00 | 2.72  | 2.70 | -0.77 |   |
| 2623.00 | 8.08  | 3.37 | 1.87  | 2833.00 | 10.98 | 5.56 | 1.58  |   |
| 3416.00 | 15.69 | 6.54 | 5.15  | 3386.00 | 11.40 | 5.98 | 1.70  |   |
| 2042.00 | 3.62  | 1.51 | -0.06 | 1844.00 | 2.22  | 3.20 | -0.91 |   |
| 1800.00 | 1.72  | 0.72 | -0.88 | 1808.00 | 2.38  | 3.04 | -0.86 |   |
| 3810.00 | 11.16 | 4.65 | 3.19  | 3724.00 | 10.29 | 4.87 | 1.38  | y |
| 3976.00 | 5.51  | 2.30 | 0.76  | 3445.00 | 3.19  | 2.23 | -0.63 |   |
| 3359.00 | 4.50  | 1.87 | 0.32  | 3563.00 | 6.93  | 1.51 | 0.43  |   |
| 2439.00 | 6.36  | 2.65 | 1.12  | 2522.00 | 7.18  | 1.76 | 0.50  |   |
| 2101.00 | 4.62  | 1.92 | 0.37  | 1831.00 | 8.36  | 2.94 | 0.83  |   |
| 5100.00 | 7.90  | 3.29 | 1.79  | 5321.00 | 12.35 | 6.93 | 1.96  |   |
| 4249.00 | 9.86  | 4.11 | 2.64  | 4955.00 | 11.93 | 6.51 | 1.84  | y |
| 2602.00 | 2.46  | 1.02 | -0.56 | 2355.00 | 3.95  | 1.47 | -0.42 |   |
| 3433.00 | 1.92  | 0.80 | -0.79 | 3504.00 | 3.05  | 2.37 | -0.67 |   |
| 3172.00 | 2.55  | 1.06 | -0.52 | 3863.00 | 2.95  | 2.47 | -0.70 |   |
| 2392.00 | 4.10  | 1.71 | 0.15  | 2784.00 | 4.31  | 1.11 | -0.32 |   |
| 1875.00 | 2.13  | 0.89 | -0.70 | 2255.00 | 4.48  | 0.94 | -0.27 |   |
| 3275.00 | 6.72  | 2.80 | 1.28  | 2347.00 | 5.41  | 0.01 | 0.00  |   |
| 2177.00 | 8.87  | 3.69 | 2.21  | 1493.00 | 8.44  | 3.02 | 0.86  |   |
| 2270.00 | 4.19  | 1.74 | 0.19  | 2161.00 | 2.13  | 3.29 | -0.93 |   |
| 2003.00 | 13.98 | 5.82 | 4.41  | 2532.00 | 15.21 | 9.79 | 2.77  | y |
| 2007.00 | 2.59  | 1.08 | -0.50 | 2287.00 | 4.07  | 1.35 | -0.38 |   |
| 1732.00 | 1.79  | 0.75 | -0.85 | 2700.00 | 6.56  | 1.14 | 0.32  |   |
| 1530.00 | 8.95  | 3.73 | 2.24  | 1749.00 | 9.43  | 4.01 | 1.14  |   |
| 3826.00 | 16.49 | 6.87 | 5.50  | 3669.00 | 13.22 | 7.80 | 2.21  | x |
| 1686.00 | 6.76  | 2.82 | 1.30  | 1869.00 | 3.37  | 2.05 | -0.58 |   |
| 504.00  | 9.33  | 3.89 | 2.40  | 591.00  | 12.52 | 7.10 | 2.01  | x |
| 4649.00 | 7.29  | 3.04 | 1.53  | 4425.00 | 10.46 | 5.04 | 1.43  |   |
| 2434.00 | 4.48  | 1.87 | 0.31  | 2928.00 | 4.58  | 0.84 | -0.24 |   |
| 2541.00 | 6.73  | 2.80 | 1.28  | 2710.00 | 4.54  | 0.88 | -0.25 |   |
| 3659.00 | 6.91  | 2.88 | 1.36  | 2991.00 | 4.75  | 0.67 | -0.19 |   |
| 3579.00 | 14.92 | 6.22 | 4.82  | 2714.00 | 8.51  | 3.09 | 0.88  |   |
| 1976.00 | 2.83  | 1.18 | -0.40 | 2229.00 | 9.02  | 3.60 | 1.02  |   |
| 3928.00 | 0.89  | 0.37 | -1.24 | 3108.00 | 4.57  | 0.85 | -0.24 |   |
| 3463.00 | 4.42  | 1.84 | 0.29  | 3696.00 | 12.61 | 7.19 | 2.04  | y |
| 3293.00 | 7.44  | 3.10 | 1.59  | 3244.00 | 8.01  | 2.59 | 0.74  |   |
| 3777.00 | 0.71  | 0.30 | -1.31 | 2445.00 | 6.01  | 0.59 | 0.17  |   |
| 3684.00 | 3.83  | 1.59 | 0.03  | 4126.00 | 8.63  | 3.21 | 0.91  |   |
| 3442.00 | 3.20  | 1.33 | -0.24 | 2977.00 | 4.06  | 1.36 | -0.38 |   |
| 3404.00 | 3.20  | 1.33 | -0.24 | 3205.00 | 7.30  | 1.88 | 0.53  |   |

art. A,c

toxic a,b,c

|         |       |      |       |         |       |       |       |   |
|---------|-------|------|-------|---------|-------|-------|-------|---|
| 2697.00 | 10.90 | 4.54 | 3.09  | 2731.00 | 12.63 | 7.21  | 2.04  | y |
| 2829.00 | 11.06 | 4.61 | 3.16  | 3739.00 | 20.89 | 15.47 | 4.39  | y |
| 2117.00 | 6.38  | 2.66 | 1.13  | 2383.00 | 9.78  | 4.36  | 1.24  |   |
| 1986.00 | 3.37  | 1.41 | -0.17 | 1911.00 | 6.96  | 1.54  | 0.44  |   |
| 2543.00 | 3.38  | 1.41 | -0.16 | 2823.00 | 5.92  | 0.50  | 0.14  |   |
| 2369.00 | 3.38  | 1.41 | -0.16 | 2764.00 | 8.29  | 2.87  | 0.81  |   |
| 2769.00 | 7.69  | 3.21 | 1.70  | 2827.00 | 12.27 | 6.85  | 1.94  |   |
| 3563.00 | 3.90  | 1.63 | 0.06  | 3753.00 | 6.18  | 0.76  | 0.22  |   |
| 3674.00 | 10.64 | 4.43 | 2.97  | 4394.00 | 13.36 | 7.94  | 2.25  | y |
| 2437.00 | 2.38  | 0.99 | -0.59 | 3517.00 | 8.08  | 2.66  | 0.75  |   |
| 3596.00 | 2.92  | 1.22 | -0.36 | 4106.00 | 6.65  | 1.23  | 0.35  |   |
| 3008.00 | 2.93  | 1.22 | -0.36 | 4684.00 | 6.62  | 1.20  | 0.34  |   |
| 3582.00 | 5.67  | 2.36 | 0.83  | 4463.00 | 10.60 | 5.18  | 1.47  |   |
| 2949.00 | 1.70  | 0.71 | -0.89 | 2526.00 | 3.76  | 1.66  | -0.47 |   |
| 3154.00 | 3.99  | 1.66 | 0.10  | 2559.00 | 4.26  | 1.16  | -0.33 |   |
| 6518.00 | 5.28  | 2.20 | 0.66  | 5574.00 | 10.17 | 4.75  | 1.35  |   |
| 5831.00 | 4.65  | 1.94 | 0.39  | 4038.00 | 7.70  | 2.28  | 0.65  |   |
| 1398.00 | 5.87  | 2.44 | 0.91  | 917.00  | 5.45  | 0.03  | 0.01  |   |
| 5464.00 | 11.42 | 4.76 | 3.31  | 4847.00 | 9.78  | 4.36  | 1.24  |   |
| 3510.00 | 6.07  | 2.53 | 1.00  | 2725.00 | 5.58  | 0.16  | 0.04  |   |
| 2556.00 | 3.21  | 1.34 | -0.24 | 2519.00 | 2.14  | 3.28  | -0.93 |   |
| 2640.00 | 2.12  | 0.88 | -0.71 | 2490.00 | 3.57  | 1.85  | -0.52 |   |
| 2116.00 | 4.11  | 1.71 | 0.15  | 3452.00 | 9.82  | 4.40  | 1.25  |   |
| 3814.00 | 4.75  | 1.98 | 0.43  | 3192.00 | 2.16  | 3.26  | -0.92 |   |
| 3547.00 | 2.65  | 1.10 | -0.48 | 2009.00 | 2.04  | 3.38  | -0.96 |   |
| 4158.00 | 22.01 | 9.17 | 7.88  | 3182.00 | 13.48 | 8.06  | 2.29  | y |
| 2834.00 | 4.80  | 2.00 | 0.45  | 3329.00 | 4.36  | 1.06  | -0.30 |   |
| 3842.00 | 2.34  | 0.98 | -0.61 | 2426.00 | 2.43  | 2.99  | -0.85 |   |
| 2944.00 | 2.55  | 1.06 | -0.52 | 2793.00 | 2.08  | 3.34  | -0.95 |   |
| 2659.00 | 7.86  | 3.28 | 1.77  | 3353.00 | 9.36  | 3.94  | 1.12  |   |
| 2362.00 | 6.69  | 2.79 | 1.27  | 2192.00 | 7.76  | 2.34  | 0.66  |   |
| 2910.00 | 7.22  | 3.01 | 1.49  | 2610.00 | 5.75  | 0.33  | 0.09  |   |
| 2345.00 | 1.32  | 0.55 | -1.05 | 3226.00 | 4.37  | 1.05  | -0.30 |   |
| 3779.00 | 4.71  | 1.96 | 0.41  | 4154.00 | 4.33  | 1.09  | -0.31 |   |
| 3132.00 | 11.24 | 4.68 | 3.23  | 3512.00 | 6.55  | 1.13  | 0.32  |   |
| 2775.00 | 7.06  | 2.94 | 1.43  | 3401.00 | 9.20  | 3.78  | 1.07  |   |
| 3669.00 | 11.94 | 4.97 | 3.53  | 4992.00 | 9.05  | 3.63  | 1.03  |   |
| 3875.00 | 6.17  | 2.57 | 1.04  | 3186.00 | 8.73  | 3.31  | 0.94  |   |
| 3496.00 | 3.12  | 1.30 | -0.28 | 3801.00 | 5.50  | 0.08  | 0.02  |   |
| 3471.00 | 3.28  | 1.37 | -0.20 | 3522.00 | 4.86  | 0.56  | -0.16 |   |
| 3067.00 | 12.62 | 5.26 | 3.83  | 3370.00 | 15.79 | 10.37 | 2.94  | y |
| 2023.00 | 4.10  | 1.71 | 0.15  | 1887.00 | 6.41  | 0.99  | 0.28  |   |
| 928.00  | 0.65  | 0.27 | -1.34 | 2037.00 | 5.60  | 0.18  | 0.05  |   |
| 2768.00 | 4.70  | 1.96 | 0.41  | 2561.00 | 7.73  | 2.31  | 0.65  |   |
| 1986.00 | 4.38  | 1.83 | 0.27  | 3109.00 | 8.17  | 2.75  | 0.78  |   |
| 2250.00 | 5.69  | 2.37 | 0.83  | 3134.00 | 10.50 | 5.08  | 1.44  |   |
| 2311.00 | 5.06  | 2.11 | 0.56  | 2051.00 | 6.73  | 1.31  | 0.37  |   |

|         |       |      |       |         |       |       |                 |
|---------|-------|------|-------|---------|-------|-------|-----------------|
| 4145.00 | 7.89  | 3.29 | 1.78  | 3460.00 | 11.91 | 6.49  | 1.84            |
| 3101.00 | 4.45  | 1.85 | 0.30  | 3009.00 | 10.10 | 4.68  | 1.33            |
| 1476.00 | 1.90  | 0.79 | -0.80 | 1563.00 | 7.61  | 2.19  | 0.62            |
| 3450.00 | 7.19  | 3.00 | 1.48  | 2138.00 | 3.88  | 1.54  | -0.44           |
| 3342.00 | 1.83  | 0.76 | -0.83 | 2510.00 | 6.81  | 1.39  | 0.39            |
| 2529.00 | 3.44  | 1.43 | -0.14 | 3648.00 | 7.05  | 1.63  | 0.46            |
| 3899.00 | 3.00  | 1.25 | -0.33 | 3196.00 | 2.97  | 2.45  | -0.69           |
| 2041.00 | 3.18  | 1.33 | -0.25 | 2449.00 | 2.78  | 2.64  | -0.75           |
| 4055.00 | 7.23  | 3.01 | 1.50  | 3915.00 | 3.14  | 2.28  | -0.65           |
| 2987.00 | 3.15  | 1.31 | -0.26 | 1999.00 | 1.35  | 4.07  | -1.15           |
| 6177.00 | 9.13  | 3.80 | 2.32  | 3534.00 | 5.43  | 0.01  | 0.00 y          |
| 4379.00 | 7.74  | 3.23 | 1.72  | 3446.00 | 6.82  | 1.40  | 0.40            |
| 3696.00 | 4.19  | 1.75 | 0.19  | 3848.00 | 5.95  | 0.53  | 0.15            |
| 3292.00 | 9.96  | 4.15 | 2.68  | 2430.00 | 7.74  | 2.32  | 0.66            |
| 3263.00 | 11.34 | 4.72 | 3.27  | 1568.00 | 10.27 | 4.85  | 1.37 y          |
| 383.00  | 20.63 | 8.59 | 7.28  | 1422.00 | 3.66  | 1.76  | -0.50           |
| 3934.00 | 6.10  | 2.54 | 1.01  | 2321.00 | 4.01  | 1.41  | -0.40           |
| 3410.00 | 8.04  | 3.35 | 1.85  | 2158.00 | 3.94  | 1.48  | -0.42           |
| 2330.00 | 2.19  | 0.91 | -0.68 | 1037.00 | 2.70  | 2.72  | -0.77           |
| 3810.00 | 6.96  | 2.90 | 1.38  | 2553.00 | 5.88  | 0.46  | 0.13            |
| 4349.00 | 9.27  | 3.86 | 2.38  | 2302.00 | 9.69  | 4.27  | 1.21            |
| 4744.00 | 8.03  | 3.35 | 1.85  | 2728.00 | 5.46  | 0.04  | 0.01            |
| 4039.00 | 4.58  | 1.91 | 0.36  | 3075.00 | 1.95  | 3.47  | -0.98           |
| 4300.00 | 9.33  | 3.89 | 2.40  | 3287.00 | 10.80 | 5.38  | 1.53 y          |
| 4717.00 | 7.59  | 3.16 | 1.66  | 4509.00 | 6.88  | 1.46  | 0.41            |
| 3246.00 | 1.85  | 0.77 | -0.82 | 3943.00 | 8.90  | 3.48  | 0.99            |
| 2487.00 | 7.96  | 3.32 | 1.82  | 2774.00 | 7.82  | 2.40  | 0.68            |
| 3496.00 | 10.58 | 4.41 | 2.95  | 5064.00 | 15.92 | 10.50 | 2.98 debris b,c |
| 3104.00 | 5.03  | 2.09 | 0.55  | 3258.00 | 8.32  | 2.90  | 0.82            |
| 3734.00 | 4.87  | 2.03 | 0.48  | 3511.00 | 2.99  | 2.43  | -0.69           |
| 2162.00 | 0.69  | 0.29 | -1.32 | 1555.00 | 2.57  | 2.85  | -0.81           |
| 2118.00 | 3.45  | 1.44 | -0.13 | 2535.00 | 3.39  | 2.03  | -0.58           |
| 3749.00 | 5.81  | 2.42 | 0.89  | 2783.00 | 6.97  | 1.55  | 0.44            |
| 2553.00 | 2.00  | 0.83 | -0.76 | 2180.00 | 7.02  | 1.60  | 0.45            |
| 1966.00 | 4.83  | 2.01 | 0.46  | 3021.00 | 14.86 | 9.44  | 2.68            |
| 931.00  | 1.50  | 0.63 | -0.97 | 2023.00 | 2.97  | 2.45  | -0.70           |
| 2910.00 | 4.64  | 1.93 | 0.38  | 2148.00 | 1.82  | 3.60  | -1.02           |
| 2555.00 | 2.04  | 0.85 | -0.74 | 2187.00 | 5.35  | 0.07  | -0.02           |
| 1419.00 | 3.31  | 1.38 | -0.19 | 1531.00 | 1.57  | 3.85  | -1.09           |
| 3527.00 | 3.86  | 1.61 | 0.04  | 1992.00 | 3.26  | 2.16  | -0.61           |
| 3188.00 | 6.90  | 2.88 | 1.36  | 1998.00 | 4.50  | 0.92  | -0.26           |
| 2821.00 | 4.11  | 1.71 | 0.15  | 1876.00 | 3.36  | 2.06  | -0.59           |
| 3005.00 | 7.42  | 3.09 | 1.58  | 1804.00 | 1.72  | 3.70  | -1.05           |
| 3083.00 | 4.67  | 1.95 | 0.40  | 2915.00 | 2.26  | 3.16  | -0.90           |
| 4903.00 | 6.26  | 2.61 | 1.08  | 4513.00 | 4.68  | 0.74  | -0.21           |
| 2588.00 | 2.55  | 1.06 | -0.52 | 2894.00 | 1.87  | 3.55  | -1.01           |
| 2073.00 | 2.03  | 0.84 | -0.75 | 2461.00 | 2.32  | 3.10  | -0.88           |

|         |       |         |       |         |       |       |        |            |
|---------|-------|---------|-------|---------|-------|-------|--------|------------|
| 3306.00 | 8.98  | 3.74    | 2.26  | 3182.00 | 11.25 | 5.83  | 1.65 x | debris b,c |
| 3338.00 | 2.55  | 1.06    | -0.52 | 2968.00 | 1.45  | 3.97  | -1.13  |            |
| 3739.00 | 8.24  | 3.43    | 1.94  | 3768.00 | 10.32 | 4.90  | 1.39   |            |
| 3080.00 | 5.71  | 2.38    | 0.85  | 4352.00 | 7.61  | 2.19  | 0.62   |            |
| 1189.00 | 4.79  | 2.00    | 0.45  | 1000.00 | 9.50  | 4.08  | 1.16   |            |
| 2878.00 | 5.35  | 2.23    | 0.69  | 2820.00 | 3.40  | 2.02  | -0.57  |            |
| 4257.00 | 9.56  | 3.98    | 2.51  | 2267.00 | 10.23 | 4.81  | 1.36 x | debris b,c |
| 2858.00 | 2.17  | 0.90    | -0.68 | 2526.00 | 4.20  | 1.22  | -0.35  |            |
| 935.00  | 2.14  | 0.89    | -0.70 | 1859.00 | 1.45  | 3.97  | -1.13  |            |
| 1394.00 | 2.30  | 0.96    | -0.63 | 1101.00 | 2.91  | 2.51  | -0.71  |            |
| 4405.00 | 2.66  | 1.11    | -0.47 | 2652.00 | 7.32  | 1.90  | 0.54   |            |
| 3433.00 | 2.36  | 0.98    | -0.60 | 1773.00 | 2.82  | 2.60  | -0.74  |            |
| 3853.00 | 2.02  | 0.84    | -0.75 | 2904.00 | 5.17  | 0.25  | -0.07  |            |
| 3796.00 | 5.74  | 2.39    | 0.86  | 2726.00 | 6.90  | 1.48  | 0.42   |            |
| 3089.00 | 3.82  | 1.59    | 0.03  | 3573.00 | 7.92  | 2.50  | 0.71   |            |
| 3348.00 | 2.00  | 0.83    | -0.76 | 4383.00 | 12.57 | 7.15  | 2.03 y |            |
| 3290.00 | 4.44  | 1.85    | 0.29  | 3553.00 | 4.02  | 1.40  | -0.40  |            |
| 4859.00 | 11.32 | 4.72    | 3.27  | 6542.00 | 15.53 | 10.11 | 2.87 y |            |
| 2249.00 | 4.00  | 1.67    | 0.11  | 3032.00 | 6.63  | 1.21  | 0.34   |            |
| 1647.00 | 1.76  | 0.73    | -0.86 | 3190.00 | 8.46  | 3.04  | 0.86   |            |
| 1626.00 | 1.54  | 0.64    | -0.96 | 3506.00 | 3.22  | 2.20  | -0.62  |            |
| 1987.00 | 1.76  | 0.73    | -0.86 | 3990.00 | 3.31  | 2.11  | -0.60  |            |
| 1530.00 | 2.22  | 0.93    | -0.66 | 2209.00 | 3.26  | 2.16  | -0.61  |            |
| 1755.00 | 1.65  | 0.69    | -0.91 | 2312.00 | 6.19  | 0.77  | 0.22   |            |
| 1449.00 | 0.76  | 0.32    | -1.29 | 2018.00 | 4.71  | 0.71  | -0.20  |            |
| 1943.00 | 1.60  | 0.66    | -0.93 | 3607.00 | 9.12  | 3.70  | 1.05   |            |
| 3803.00 | 1.71  | 0.71    | -0.88 | 3233.00 | 4.52  | 0.90  | -0.26  |            |
| 1830.00 | 3.50  | 1.46    | -0.11 | 1939.00 | 10.26 | 4.84  | 1.37   |            |
| 1022.00 | 0.39  | 0.16    | -1.45 | 2389.00 | 9.21  | 3.79  | 1.07   |            |
| 1564.00 | 0.96  | 0.40    | -1.21 | 1306.00 | 2.91  | 2.51  | -0.71  |            |
| 2074.00 | 1.74  | 0.72    | -0.87 | 2068.00 | 10.49 | 5.07  | 1.44   |            |
| 2802.00 | 1.61  | 0.67    | -0.93 | 1986.00 | 6.90  | 1.48  | 0.42   |            |
| 2353.00 | 1.66  | 0.69    | -0.91 | 2500.00 | 5.00  | 0.42  | -0.12  |            |
| 2916.00 | 1.30  | 0.54    | -1.06 | 3135.00 | 3.96  | 1.46  | -0.42  |            |
| 1714.00 | 1.87  | 0.78    | -0.82 | 1819.00 | 7.48  | 2.06  | 0.58   |            |
| 1650.00 | 5.15  | 2.15    | 0.60  | 1102.00 | 4.17  | 1.25  | -0.35  |            |
| 3512.00 | 2.08  | 0.87    | -0.72 | 3360.00 | 2.02  | 3.40  | -0.96  |            |
| 2528.00 | 1.54  | 0.64    | -0.96 | 3604.00 | 5.77  | 0.35  | 0.10   |            |
| 1237.00 | 1.13  | 0.47    | -1.13 | 2049.00 | 2.20  | 3.22  | -0.91  |            |
| 2630.50 | 3.76  | 1.56    |       | 2993.50 | 5.42  | 2.38  |        |            |
|         |       | 4.69    |       |         |       | 7.15  |        |            |
|         |       | 2.32    |       |         |       | 3.53  |        |            |
| 20.19   |       | 3382.00 | 33.53 |         |       |       |        |            |
|         |       | 4249.00 | 37.89 |         |       |       |        |            |
| 23.69   |       | 4451.00 | 33.30 |         |       |       |        |            |
| 21.94   |       | 4462.00 | 38.39 |         |       |       |        |            |

|       |         |       |
|-------|---------|-------|
| 21.94 | 4136.00 | 35.78 |
| 1.75  | 512.12  | 2.74  |
|       | 1562.00 | 5.06  |
| 2.97  | 974.00  | 4.52  |
| 3.84  | 1028.00 | 4.18  |
| 2.27  | 1126.00 | 4.97  |
| 3.03  | 1172.50 | 4.68  |
| 0.79  | 267.18  | 0.41  |
| 5.25  |         | 8.22  |
| 2.36  |         | 1.23  |
| 7.60  |         | 9.44  |
| 18.92 |         | 31.09 |
| 0.40  |         | 0.30  |
| 0.60  |         | 0.70  |

|       |         |       |
|-------|---------|-------|
| 1.32  | 2077.00 | 7.70  |
| 2.99  | 2741.00 | 5.62  |
| 16.29 | 7099.00 | 19.37 |
| 8.37  | 5572.00 | 10.50 |
| 20.90 | 167.00  | 4.19  |
| 3.50  | 213.00  | 8.45  |

| Plate    | Well | Gene                  | GeneID    | Cell Coun | % inf   | Abs Dev | rZ   |       |
|----------|------|-----------------------|-----------|-----------|---------|---------|------|-------|
| 50020.00 | A02  | M-012456- membrane    | 9863.00   | MAGI2     | 2419.00 | 9.84    | 2.67 | 0.56  |
| 50020.00 | A04  | M-020014- AHA1, acti  | 10598.00  | AHSA1     | 2922.00 | 4.62    | 2.55 | -0.54 |
| 50020.00 | A05  | M-011572- apolipopro  | 336.00    | APOA2     | 3561.00 | 2.05    | 5.12 | -1.08 |
| 50020.00 | A06  | M-015374- angiotensir | 57085.00  | AGTRAP    | 2856.00 | 6.90    | 0.27 | -0.06 |
| 50020.00 | A07  | M-010995- apolipopro  | 337.00    | APOA4     | 3184.00 | 2.89    | 4.28 | -0.90 |
| 50020.00 | A08  | M-010987- amylo-1, 6- | 178.00    | AGL       | 2686.00 | 2.90    | 4.27 | -0.90 |
| 50020.00 | A09  | M-010996- apolipopro  | 345.00    | APOC3     | 2690.00 | 4.68    | 2.49 | -0.52 |
| 50020.00 | A10  | M-010643- myeloid/ly  | 10962.00  | MLLT11    | 3723.00 | 3.49    | 3.68 | -0.77 |
| 50020.00 | A11  | M-007749- apolipopro  | 347.00    | APOD      | 3105.00 | 12.75   | 5.58 | 1.18  |
| 50020.00 | A12  | M-026036- MAM dom     | 158056.00 | MAMDC4    | 4031.00 | 4.17    | 3.00 | -0.63 |
| 50020.00 | A13  | M-007811- apolipopro  | 350.00    | APOH      | 3262.00 | 4.84    | 2.33 | -0.49 |
| 50020.00 | A14  | M-006656- poly (ADP-i | 142.00    | PARP1     | 3714.00 | 14.32   | 7.15 | 1.51  |
| 50020.00 | A15  | M-017402- apolipopro  | 8542.00   | APOL1     | 2106.00 | 4.32    | 2.85 | -0.60 |
| 50020.00 | A16  | M-008114- alcohol def | 128.00    | ADH5      | 3043.00 | 3.09    | 4.08 | -0.86 |
| 50020.00 | A17  | M-019496- bicaudal D  | 636.00    | BICD1     | 2531.00 | 6.20    | 0.97 | -0.20 |
| 50020.00 | A18  | M-008113- alcohol def | 127.00    | ADH4      | 3784.00 | 9.22    | 2.05 | 0.43  |
| 50020.00 | A19  | M-014060- bicaudal D  | 23299.00  | BICD2     | 3816.00 | 9.59    | 2.42 | 0.51  |
| 50020.00 | A20  | M-008112- alcohol def | 125.00    | ADH1B     | 3116.00 | 9.18    | 2.01 | 0.42  |
| 50020.00 | A21  | M-006121- calcium chi | 773.00    | CACNA1A   | 1485.00 | 8.42    | 1.25 | 0.26  |
| 50020.00 | A23  | M-006123- calcium chi | 775.00    | CACNA1C   | 1927.00 | 5.45    | 1.72 | -0.36 |
| 50020.00 | B02  | M-009265- YY1 associa | 10138.00  | YAF2      | 2851.00 | 1.54    | 5.63 | -1.18 |
| 50020.00 | B04  | M-004377- chromosor   | 51374.00  | C2orf28   | 1493.00 | 3.88    | 3.29 | -0.69 |
| 50020.00 | B05  | M-017696- A kinase (P | 158798.00 | AKAP14    | 3126.00 | 8.93    | 1.76 | 0.37  |
| 50020.00 | B06  | M-010963- bromodom    | 54014.00  | BRWD1     | 4802.00 | 5.29    | 1.88 | -0.39 |
| 50020.00 | B07  | M-006467- aurora kin  | 54998.00  | AURKAIP1  | 3655.00 | 1.67    | 5.50 | -1.16 |
| 50020.00 | B08  | M-021229- chromosor   | 55321.00  | C20orf46  | 2900.00 | 2.45    | 4.72 | -0.99 |
| 50020.00 | B09  | M-005087- aldo-keto r | 10327.00  | AKR1A1    | 3503.00 | 3.88    | 3.29 | -0.69 |
| 50020.00 | B10  | M-017986- chromosor   | 55245.00  | C20orf44  | 2655.00 | 5.88    | 1.29 | -0.27 |
| 50020.00 | B11  | M-004036- aldo-keto r | 231.00    | AKR1B1    | 4679.00 | 6.07    | 1.10 | -0.23 |
| 50020.00 | B12  | M-017050- chromosor   | 25876.00  | C20orf28  | 4089.00 | 7.73    | 0.56 | 0.12  |
| 50020.00 | B13  | M-008731- aldo-keto r | 83592.00  | AKR1CL2   | 2298.00 | 1.31    | 5.86 | -1.23 |
| 50020.00 | B14  | M-019769- chromosor   | 24141.00  | C20orf103 | 3137.00 | 6.22    | 0.95 | -0.20 |
| 50020.00 | B15  | M-008458- aminolevul  | 210.00    | ALAD      | 2300.00 | 2.09    | 5.08 | -1.07 |
| 50020.00 | B16  | M-012536- compleme    | 714.00    | C1QC      | 2848.00 | 2.91    | 4.26 | -0.89 |
| 50020.00 | B17  | M-008722- aldehyde d  | 216.00    | ALDH1A1   | 3679.00 | 3.26    | 3.91 | -0.82 |
| 50020.00 | B18  | M-011000- compleme    | 713.00    | C1QB      | 3261.00 | 5.00    | 2.17 | -0.46 |
| 50020.00 | B19  | M-009386- aldehyde d  | 224.00    | ALDH3A2   | 2667.00 | 3.64    | 3.53 | -0.74 |
| 50020.00 | B20  | M-013136- compleme    | 712.00    | C1QA      | 2242.00 | 2.19    | 4.98 | -1.05 |
| 50020.00 | B21  | M-008379- aldehyde d  | 223.00    | ALDH9A1   | 5257.00 | 12.67   | 5.50 | 1.16  |
| 50020.00 | B23  | M-010990- aldolase B, | 229.00    | ALDOB     | 4302.00 | 2.02    | 5.15 | -1.08 |
| 50020.00 | C02  | M-013437- ADAMTS-li   | 92949.00  | ADAMTSL1  | 4445.00 | 6.66    | 0.51 | -0.11 |
| 50020.00 | C04  | M-005769- ADAM met    | 170692.00 | ADAMTSL1E | 3646.00 | 7.93    | 0.76 | 0.16  |
| 50020.00 | C05  | M-006124- calcium chi | 776.00    | CACNA1D   | 4091.00 | 14.47   | 7.30 | 1.54  |
| 50020.00 | C06  | M-005767- ADAM met    | 170690.00 | ADAMTSL1E | 2338.00 | 2.01    | 5.16 | -1.08 |
| 50020.00 | C07  | M-006125- calcium chi | 777.00    | CACNA1E   | 3259.00 | 6.93    | 0.24 | -0.05 |
| 50020.00 | C08  | M-032272- ADAM met    | 1596.00   | ADAM3B    | 3552.00 | 14.16   | 6.99 | 1.47  |

|              |                        |           |           |         |       |       |       |
|--------------|------------------------|-----------|-----------|---------|-------|-------|-------|
| 50020.00 C09 | M-006126- calcium ch   | 778.00    | CACNA1F   | 3891.00 | 29.68 | 22.51 | 4.74  |
| 50020.00 C10 | M-005118- ADAM met     | 8038.00   | ADAM12    | 4219.00 | 8.70  | 1.53  | 0.32  |
| 50020.00 C11 | M-006128- calcium ch   | 8912.00   | CACNA1H   | 3663.00 | 10.67 | 3.50  | 0.74  |
| 50020.00 C12 | M-017297- SPC25, ND    | 57405.00  | SPC25     | 1640.00 | 2.80  | 4.37  | -0.92 |
| 50020.00 C13 | M-006129- calcium ch   | 8911.00   | CACNA1I   | 3023.00 | 9.26  | 2.09  | 0.44  |
| 50020.00 C14 | M-009937- acylphosph   | 97.00     | ACYP1     | 2115.00 | 10.17 | 3.00  | 0.63  |
| 50020.00 C15 | M-019771- CD160 mol    | 11126.00  | CD160     | 2032.00 | 6.00  | 1.17  | -0.24 |
| 50020.00 C16 | M-012077- ARP3 actin   | 10096.00  | ACTR3     | 2277.00 | 13.35 | 6.18  | 1.30  |
| 50020.00 C17 | M-011829- cadherin 1   | 1015.00   | CDH17     | 3788.00 | 9.87  | 2.70  | 0.57  |
| 50020.00 C18 | M-012076- ARP2 actin   | 10097.00  | ACTR2     | 2378.00 | 9.92  | 2.75  | 0.58  |
| 50020.00 C19 | M-006159- cyclic nucle | 1261.00   | CNGA3     | 2525.00 | 6.77  | 0.40  | -0.08 |
| 50020.00 C20 | M-012074- ARP1 actin   | 10121.00  | ACTR1A    | 2575.00 | 11.69 | 4.52  | 0.95  |
| 50020.00 C21 | M-006160- cyclic nucle | 1258.00   | CNGB1     | 3190.00 | 6.02  | 1.15  | -0.24 |
| 50020.00 C23 | M-004413- CSE1 chron   | 1434.00   | CSE1L     | 2615.00 | 13.88 | 6.71  | 1.41  |
| 50020.00 D02 | M-015184- cell divisio | 79577.00  | CDC73     | 2956.00 | 2.03  | 5.14  | -1.08 |
| 50020.00 D04 | M-020160- chromosor    | 10712.00  | C1orf2    | 3378.00 | 2.22  | 4.95  | -1.04 |
| 50020.00 D05 | M-012697- aldolase C,  | 230.00    | ALDOC     | 2835.00 | 6.77  | 0.40  | -0.08 |
| 50020.00 D06 | M-016688- chromosor    | 84520.00  | C14orf142 | 4010.00 | 3.49  | 3.68  | -0.77 |
| 50020.00 D07 | M-013662- asparagine   | 29929.00  | ALG6      | 4536.00 | 6.02  | 1.15  | -0.24 |
| 50020.00 D08 | M-015700- chromosor    | 221150.00 | C13orf3   | 1771.00 | 2.82  | 4.35  | -0.91 |
| 50020.00 D09 | M-004283- alkB, alkyla | 8846.00   | ALKBH1    | 2617.00 | 5.01  | 2.16  | -0.45 |
| 50020.00 D10 | M-020692- chromosor    | 745.00    | C11orf9   | 3066.00 | 4.76  | 2.41  | -0.51 |
| 50020.00 D11 | M-012889- Alstrom sy   | 7840.00   | ALMS1     | 1672.00 | 2.27  | 4.90  | -1.03 |
| 50020.00 D12 | M-018682- cyclin Y     | 219771.00 | CCNY      | 4201.00 | 12.45 | 5.28  | 1.11  |
| 50020.00 D13 | M-004530- arachidona   | 240.00    | ALOX5     | 4243.00 | 6.76  | 0.41  | -0.08 |
| 50020.00 D14 | M-020058- cell divisio | 8872.00   | CDC123    | 2432.00 | 10.77 | 3.60  | 0.76  |
| 50020.00 D15 | M-008673- alkaline ph  | 248.00    | ALPI      | 3316.00 | 10.86 | 3.69  | 0.78  |
| 50020.00 D16 | M-016002- chromosor    | 118924.00 | C10orf4   | 3708.00 | 12.06 | 4.89  | 1.03  |
| 50020.00 D17 | M-003454- alkaline ph  | 250.00    | ALPP      | 2905.00 | 4.78  | 2.39  | -0.50 |
| 50020.00 D18 | M-006826- BUB3 budd    | 9184.00   | BUB3      | 2328.00 | 0.47  | 6.70  | -1.41 |
| 50020.00 D19 | M-016868- amyotroph    | 130540.00 | ALS2CR12  | 3426.00 | 1.96  | 5.21  | -1.10 |
| 50020.00 D20 | M-013364- B-cell trans | 54766.00  | BTG4      | 1852.00 | 2.32  | 4.85  | -1.02 |
| 50020.00 D21 | M-018351- amyotroph    | 65068.00  | ALS2CR14  | 4113.00 | 5.91  | 1.26  | -0.26 |
| 50020.00 D23 | M-016582- amyotroph    | 65062.00  | ALS2CR4   | 3082.00 | 3.11  | 4.06  | -0.85 |
| 50020.00 E02 | M-005073- acyl-Coenz   | 8309.00   | ACOX2     | 3585.00 | 5.52  | 1.65  | -0.35 |
| 50020.00 E04 | M-010001- acetyl-Coe   | 39.00     | ACAT2     | 4080.00 | 4.26  | 2.91  | -0.61 |
| 50020.00 E05 | M-016697- cytochrom    | 1537.00   | CYC1      | 3566.00 | 2.50  | 4.67  | -0.98 |
| 50020.00 E06 | M-008773- acetyl-Coe   | 10449.00  | ACAA2     | 4127.00 | 2.13  | 5.04  | -1.06 |
| 50020.00 E07 | M-008678- fatty acid b | 2168.00   | FABP1     | 2896.00 | 2.87  | 4.30  | -0.90 |
| 50020.00 E08 | M-011320- actin bindi  | 3983.00   | ABLIM1    | 3390.00 | 6.40  | 0.77  | -0.16 |
| 50020.00 E09 | M-008710- fatty acid b | 2171.00   | FABP5     | 3787.00 | 3.20  | 3.97  | -0.84 |
| 50020.00 E10 | M-006622- ATP-bindin   | 6833.00   | ABCC8     | 4130.00 | 7.99  | 0.82  | 0.17  |
| 50020.00 E11 | M-008851- fatty acid b | 2172.00   | FABP6     | 2006.00 | 4.89  | 2.28  | -0.48 |
| 50020.00 E12 | M-007314- ATP-bindin   | 10057.00  | ABCC5     | 2784.00 | 6.03  | 1.14  | -0.24 |
| 50020.00 E13 | M-008706- fatty acid b | 2173.00   | FABP7     | 3373.00 | 4.18  | 2.99  | -0.63 |
| 50020.00 E14 | M-007301- ATP-bindin   | 8647.00   | ABCB11    | 1624.00 | 6.77  | 0.40  | -0.08 |
| 50020.00 E15 | M-019189- ferredoxin   | 2230.00   | FDX1      | 4483.00 | 16.55 | 9.38  | 1.97  |



|              |                         |           |               |                |              |              |             |
|--------------|-------------------------|-----------|---------------|----------------|--------------|--------------|-------------|
| 50020.00 E16 | M-009533- ATP-bindin    | 24.00     | ABCA4         | 3339.00        | 8.39         | 1.22         | 0.26        |
| 50020.00 E17 | M-012368- GABA(A) re    | 11337.00  | GABARAP       | 3362.00        | 6.34         | 0.83         | -0.17       |
| 50020.00 E18 | M-023578- chromosor     | 89876.00  | C3orf15       | 4123.00        | 6.65         | 0.52         | -0.11       |
| 50020.00 E19 | M-018856- gastric intri | 2694.00   | GIF           | 4126.00        | 7.22         | 0.05         | 0.01        |
| 50020.00 E20 | M-009830- arylacetam    | 13.00     | AADAC         | 4669.00        | 9.77         | 2.60         | 0.55        |
| 50020.00 E21 | M-020464- golgi assoc   | 57120.00  | GOPC          | 3683.00        | 13.01        | 5.84         | 1.23        |
| 50020.00 E23 | M-011114- hemoglobi     | 3039.00   | HBA1          | 4884.00        | 4.57         | 2.60         | -0.55       |
| 50020.00 F02 | M-019135- BTG family    | 10950.00  | BTG3          | 5102.00        | 5.64         | 1.53         | -0.32       |
| 50020.00 F04 | M-016634- basic trans   | 689.00    | BTF3          | 4729.00        | 10.83        | 3.66         | 0.77        |
| 50020.00 F05 | M-015280- amyotroph     | 79800.00  | ALS2CR8       | 3616.00        | 12.92        | 5.75         | 1.21        |
| 50020.00 F06 | M-010998- biotinidase   | 686.00    | BTD           | 4346.00        | 15.07        | 7.90         | 1.66        |
| 50020.00 F07 | M-020296- Alport sync   | 9949.00   | AMMECR1       | 3059.00        | 6.34         | 0.83         | -0.17       |
| 50020.00 F08 | M-012848- Bartter syn   | 7809.00   | <u>BSND</u>   | <u>4502.00</u> | <u>30.12</u> | <u>22.95</u> | <u>4.83</u> |
| 50020.00 F09 | M-013455- amnionless    | 81693.00  | AMN           | 3078.00        | 8.74         | 1.57         | 0.33        |
| 50020.00 F10 | M-016749- Bernardine    | 26580.00  | BSDL2         | 3184.00        | 13.57        | 6.40         | 1.35        |
| 50020.00 F11 | M-009888- adenosine     | 270.00    | AMPD1         | 3008.00        | 14.23        | 7.06         | 1.49        |
| 50020.00 F12 | M-017153- BRI3 bindir   | 140707.00 | BRI3BP        | 4494.00        | 5.12         | 2.05         | -0.43       |
| 50020.00 F13 | M-005783- STAM bind     | 57559.00  | STAMBPL1      | 2792.00        | 15.29        | 8.12         | 1.71        |
| 50020.00 F14 | M-012411- BCR downs     | 26228.00  | BRDG1         | 2413.00        | 4.52         | 2.65         | -0.56       |
| 50020.00 F15 | M-020957- ankyrin re    | 56311.00  | ANKRD7        | 3023.00        | 14.19        | 7.02         | 1.48        |
| 50020.00 F16 | M-020297- bromodom      | 29117.00  | BRD7          | 3751.00        | 5.52         | 1.65         | -0.35       |
| 50020.00 F17 | M-006838- anillin, acti | 54443.00  | ANLN          | 1504.00        | 13.30        | 6.13         | 1.29        |
| 50020.00 F18 | M-004937- bromodom      | 23476.00  | BRD4          | 3211.00        | 8.16         | 0.99         | 0.21        |
| 50020.00 F19 | M-010985- acidic (leuc  | 23520.00  | <u>ANP32C</u> | <u>5223.00</u> | <u>17.08</u> | <u>9.91</u>  | <u>2.08</u> |
| 50020.00 F20 | M-004936- bromodom      | 8019.00   | BRD3          | 3958.00        | 11.42        | 4.25         | 0.89        |
| 50020.00 F21 | M-012472- acidic (leuc  | 23519.00  | ANP32D        | 3656.00        | 9.76         | 2.59         | 0.55        |
| 50020.00 F23 | M-005784- alanyl (mer   | 290.00    | ANPEP         | 5586.00        | 3.83         | 3.34         | -0.70       |
| 50020.00 G02 | M-017636- achalasia, a  | 8086.00   | AAAS          | 5046.00        | 10.82        | 3.65         | 0.77        |
| 50020.00 G04 | M-011754- phospholai    | 5350.00   | PLN           | 2888.00        | 6.68         | 0.49         | -0.10       |
| 50020.00 G05 | M-006200- hyperpolar    | 348980.00 | HCN1          | 2783.00        | 12.15        | 4.98         | 1.05        |
| 50020.00 G06 | M-008627- lipocalin 1   | 3933.00   | LCN1          | 2376.00        | 4.38         | 2.79         | -0.59       |
| 50020.00 G07 | M-006201- hyperpolar    | 610.00    | HCN2          | 2286.00        | 10.15        | 2.98         | 0.63        |
| 50020.00 G08 | M-007492- solute carri  | 1811.00   | SLC26A3       | 3054.00        | 19.71        | <u>12.54</u> | <u>2.64</u> |
| 50020.00 G09 | M-022353- hyperpolar    | 57657.00  | HCN3          | 2080.00        | 13.46        | 6.29         | 1.32        |
| 50020.00 G10 | M-012478- SEC14-like    | 23541.00  | SEC14L2       | 2665.00        | 3.90         | 3.27         | -0.69       |
| 50020.00 G11 | M-006203- hyperpolar    | 10021.00  | <u>HCN4</u>   | <u>3540.00</u> | <u>36.38</u> | <u>29.21</u> | <u>6.15</u> |
| 50020.00 G12 | M-003737- huntingtin    | 3064.00   | HD            | 3755.00        | 12.97        | 5.80         | 1.22        |
| 50020.00 G13 | M-019956- high densit   | 3069.00   | HDLBP         | 4111.00        | 19.58        | <u>12.41</u> | <u>2.61</u> |
| 50020.00 G14 | M-019889- chromosor     | 9605.00   | C16orf7       | 3099.00        | 7.29         | 0.12         | 0.03        |
| 50020.00 G15 | M-006211- potassium     | 3744.00   | KCNA10        | 2988.00        | 14.76        | 7.59         | 1.60        |
| 50020.00 G16 | M-004448- tumor necr    | 8795.00   | TNFRSF10E     | 3318.00        | 12.33        | 5.16         | 1.09        |
| 50020.00 G17 | M-006212- potassium     | 3737.00   | KCNA2         | 4143.00        | 8.62         | 1.45         | 0.30        |
| 50020.00 G18 | M-018667- RAB intera    | 5877.00   | <u>RABIF</u>  | <u>4353.00</u> | <u>19.02</u> | <u>11.85</u> | <u>2.49</u> |
| 50020.00 G19 | M-006214- potassium     | 3739.00   | KCNA4         | 3417.00        | 14.19        | 7.02         | 1.48        |
| 50020.00 G20 | M-012255- importin 7    | 10527.00  | IPO7          | 4535.00        | 19.63        | <u>12.46</u> | <u>2.62</u> |
| 50020.00 G21 | M-006215- potassium     | 3741.00   | KCNA5         | 5419.00        | 6.48         | 0.69         | -0.15       |
| 50020.00 G23 | M-006216- potassium     | 3742.00   | KCNA6         | 2387.00        | 5.45         | 1.72         | -0.36       |

|              |                         |           |         |         |       |       |       |
|--------------|-------------------------|-----------|---------|---------|-------|-------|-------|
| 50020.00 H02 | M-008664- 3'(2'), 5'-bi | 10380.00  | BPNT1   | 4496.00 | 5.61  | 1.57  | -0.33 |
| 50020.00 H04 | M-009597- bactericida   | 671.00    | BPI     | 5567.00 | 7.92  | 0.75  | 0.16  |
| 50020.00 H05 | M-011161- annexin A1    | 301.00    | ANXA1   | 3793.00 | 9.15  | 1.98  | 0.42  |
| 50020.00 H06 | M-008917- 2,3-bispho    | 669.00    | BPGM    | 3397.00 | 8.15  | 0.98  | 0.21  |
| 50020.00 H07 | M-010741- annexin A2    | 302.00    | ANXA2   | 3094.00 | 5.98  | 1.19  | -0.25 |
| 50020.00 H08 | M-004394- BCL2-relate   | 666.00    | BOK     | 4447.00 | 14.71 | 7.54  | 1.59  |
| 50020.00 H09 | M-011210- annexin A6    | 309.00    | ANXA6   | 3833.00 | 3.97  | 3.20  | -0.67 |
| 50020.00 H10 | M-011815- BCL2/aden     | 665.00    | BNIP3L  | 3212.00 | 7.50  | 0.33  | 0.07  |
| 50020.00 H11 | M-011570- annexin A8    | 244.00    | ANXA8   | 3728.00 | 10.97 | 3.80  | 0.80  |
| 50020.00 H12 | M-011222- BCL2/aden     | 662.00    | BNIP1   | 2889.00 | 13.88 | 6.71  | 1.41  |
| 50020.00 H13 | M-011470- annexin A9    | 8416.00   | ANXA9   | 2275.00 | 4.66  | 2.51  | -0.53 |
| 50020.00 H14 | M-015872- centromer     | 55839.00  | CENPN   | 2535.00 | 4.06  | 3.11  | -0.65 |
| 50020.00 H15 | M-012375- AP1 gamm      | 11276.00  | AP1GBP1 | 3766.00 | 11.55 | 4.38  | 0.92  |
| 50020.00 H16 | M-021436- basic leucir  | 8548.00   | BLZF1   | 4488.00 | 10.85 | 3.68  | 0.77  |
| 50020.00 H17 | M-005785- N-acylamin    | 327.00    | APEH    | 4528.00 | 18.77 | 11.60 | 2.44  |
| 50020.00 H18 | M-004040- biliverdin r  | 645.00    | BLVRB   | 3605.00 | 10.76 | 3.59  | 0.76  |
| 50020.00 H19 | M-010237- APEX nucle    | 328.00    | APEX1   | 4653.00 | 18.01 | 10.84 | 2.28  |
| 50020.00 H20 | M-005793- bleomycin     | 642.00    | BLMH    | 4503.00 | 13.99 | 6.82  | 1.44  |
| 50020.00 H21 | M-010212- ATG12 auto    | 9140.00   | ATG12   | 4046.00 | 9.64  | 2.47  | 0.52  |
| 50020.00 H23 | M-004374- ATG5 auto     | 9474.00   | ATG5    | 3143.00 | 9.10  | 1.93  | 0.41  |
| 50020.00 I02 | M-019207- ADP-ribosy    | 26286.00  | ARFGAP3 | 4381.00 | 9.13  | 1.96  | 0.41  |
| 50020.00 I04 | M-013321- ADP-ribosy    | 55738.00  | ARFGAP1 | 3263.00 | 7.32  | 0.15  | 0.03  |
| 50020.00 I05 | M-006217- potassium     | 3743.00   | KCNA7   | 3024.00 | 7.41  | 0.24  | 0.05  |
| 50020.00 I06 | M-005293- alpha-2-ma    | 2.00      | A2M     | 3900.00 | 9.41  | 2.24  | 0.47  |
| 50020.00 I07 | M-006218- potassium     | 3745.00   | KCNB1   | 3791.00 | 10.08 | 2.91  | 0.61  |
| 50020.00 I08 | M-023590- thioredoxir   | 114112.00 | TXNRD3  | 4307.00 | 10.43 | 3.26  | 0.69  |
| 50020.00 I09 | M-006219- potassium     | 9312.00   | KCNB2   | 2474.00 | 5.98  | 1.19  | -0.25 |
| 50020.00 I10 | M-012728- metallothi    | 4504.00   | MT3     | 2105.00 | 4.28  | 2.89  | -0.61 |
| 50020.00 I11 | M-006220- potassium     | 3746.00   | KCNC1   | 3609.00 | 10.36 | 3.19  | 0.67  |
| 50020.00 I12 | M-009647- glutathione   | 2936.00   | GSR     | 2518.00 | 10.64 | 3.47  | 0.73  |
| 50020.00 I13 | M-006221- potassium     | 3747.00   | KCNC2   | 3321.00 | 15.87 | 8.70  | 1.83  |
| 50020.00 I14 | M-006470- apolipopro    | 348.00    | APOE    | 3039.00 | 6.48  | 0.69  | -0.14 |
| 50020.00 I15 | M-006222- potassium     | 3748.00   | KCNC3   | 3790.00 | 10.55 | 3.38  | 0.71  |
| 50020.00 I16 | M-010989- albumin       | 213.00    | ALB     | 4209.00 | 12.38 | 5.21  | 1.10  |
| 50020.00 I17 | M-006223- potassium     | 3749.00   | KCNC4   | 5221.00 | 11.89 | 4.72  | 0.99  |
| 50020.00 I18 | M-007638- uncoupling    | 7352.00   | UCP3    | 3532.00 | 8.41  | 1.24  | 0.26  |
| 50020.00 I19 | M-006227- potassium     | 3754.00   | KCNF1   | 3961.00 | 8.51  | 1.34  | 0.28  |
| 50020.00 I20 | M-005114- uncoupling    | 7351.00   | UCP2    | 3472.00 | 10.71 | 3.54  | 0.75  |
| 50020.00 I21 | M-006228- potassium     | 3755.00   | KCNG1   | 2837.00 | 5.04  | 2.13  | -0.45 |
| 50020.00 I23 | M-006229- potassium     | 26251.00  | KCNG2   | 2383.00 | 2.31  | 4.86  | -1.02 |
| 50020.00 J02 | M-012276- bladder car   | 10904.00  | BLCAP   | 3208.00 | 3.34  | 3.83  | -0.81 |
| 50020.00 J04 | M-020919- bridging int  | 51411.00  | BIN2    | 5519.00 | 12.77 | 5.60  | 1.18  |
| 50020.00 J05 | M-004375- apoptosis i   | 8539.00   | API5    | 4046.00 | 18.83 | 11.66 | 2.45  |
| 50020.00 J06 | M-008246- bridging int  | 274.00    | BIN1    | 4024.00 | 7.98  | 0.81  | 0.17  |
| 50020.00 J07 | M-012963- lipoprotein   | 80350.00  | LPAL2   | 3214.00 | 8.59  | 1.42  | 0.30  |
| 50020.00 J08 | M-004388- BCL2-inter    | 638.00    | BIK     | 3874.00 | 6.74  | 0.43  | -0.09 |
| 50020.00 J09 | M-009467- apolipopro    | 338.00    | APOB    | 2702.00 | 4.85  | 2.32  | -0.49 |

|              |                        |           |               |                |              |              |             |
|--------------|------------------------|-----------|---------------|----------------|--------------|--------------|-------------|
| 50020.00 J10 | M-004387- BH3 intera   | 637.00    | BID           | 3384.00        | 11.82        | 4.65         | 0.98        |
| 50020.00 J11 | M-011573- apolipopro   | 339.00    | APOBEC1       | 1959.00        | 4.03         | 3.14         | -0.66       |
| 50020.00 J12 | M-013985- tripartite r | 25893.00  | TRIM58        | 2759.00        | 7.07         | 0.10         | -0.02       |
| 50020.00 J13 | M-017322- apolipopro   | 9582.00   | APOBEC3B      | 2556.00        | 9.55         | 2.38         | 0.50        |
| 50020.00 J14 | M-009998- folliculin   | 201163.00 | FLCN          | 3325.00        | 11.49        | 4.32         | 0.91        |
| 50020.00 J15 | M-032279- apolipopro   | 140564.00 | APOBEC3D      | 3155.00        | 4.88         | 2.29         | -0.48       |
| 50020.00 J16 | M-011471- beaded fila  | 8419.00   | BFSP2         | 3631.00        | 5.67         | 1.50         | -0.31       |
| 50020.00 J17 | M-019039- apolipopro   | 200316.00 | APOBEC3F      | 2879.00        | 11.46        | 4.29         | 0.90        |
| 50020.00 J18 | M-019160- mal, T-cell  | 7851.00   | MALL          | 3956.00        | 8.52         | 1.35         | 0.28        |
| 50020.00 J19 | M-011576- apolipopro   | 319.00    | APOF          | 2650.00        | 6.98         | 0.19         | -0.04       |
| 50020.00 J20 | M-007268- B-cell CLL/I | 607.00    | BCL9          | 3522.00        | 7.84         | 0.67         | 0.14        |
| 50020.00 J21 | M-006328- adenine ph   | 353.00    | APRT          | 3110.00        | 3.99         | 3.18         | -0.67       |
| 50020.00 J23 | M-013368- aprataxin    | 54840.00  | APTX          | 2458.00        | 1.95         | 5.22         | -1.10       |
| 50020.00 K02 | M-007636- uncoupling   | 7350.00   | UCP1          | 4332.00        | 8.49         | 1.32         | 0.28        |
| 50020.00 K04 | M-012554- transthyret  | 7276.00   | TTR           | 2134.00        | 4.17         | 3.00         | -0.63       |
| 50020.00 K05 | M-006230- potassium    | 170850.00 | KCNG3         | 4801.00        | 13.62        | 6.45         | 1.36        |
| 50020.00 K06 | M-019372- tocopherol   | 7274.00   | TTPA          | 4246.00        | 11.33        | 4.16         | 0.88        |
| 50020.00 K07 | M-006239- potassium    | 3758.00   | KCNJ1         | 2783.00        | 8.77         | 1.60         | 0.34        |
| 50020.00 K08 | M-012066- target of m  | 10043.00  | TOM1          | 3785.00        | 6.74         | 0.43         | -0.09       |
| 50020.00 K09 | M-006267- potassium    | 3778.00   | <u>KCNMA1</u> | <u>4687.00</u> | <u>23.30</u> | <u>16.13</u> | <u>3.39</u> |
| 50020.00 K10 | M-010547- tumor necr   | 7126.00   | TNFAIP1       | 3493.00        | 9.93         | 2.76         | 0.58        |
| 50020.00 K11 | M-006270- potassium    | 3782.00   | KCNN3         | 2361.00        | 12.28        | 5.11         | 1.08        |
| 50020.00 K12 | M-003718- transmembr   | 10972.00  | TMED10        | 2534.00        | 3.04         | 4.13         | -0.87       |
| 50020.00 K13 | M-006276- potassium    | 3787.00   | KCNS1         | 2150.00        | 10.19        | 3.02         | 0.63        |
| 50020.00 K14 | M-011110- transcobal   | 6948.00   | TCN2          | 2953.00        | 7.11         | 0.06         | -0.01       |
| 50020.00 K15 | M-006277- potassium    | 3790.00   | KCNS3         | 3901.00        | 11.38        | 4.21         | 0.89        |
| 50020.00 K16 | M-007634- transporte   | 6890.00   | TAP1          | 2182.00        | 11.50        | 4.33         | 0.91        |
| 50020.00 K17 | M-006278- potassium    | 27012.00  | KCNV1         | 5013.00        | 11.03        | 3.86         | 0.81        |
| 50020.00 K18 | M-020044- synaptotag   | 6857.00   | SYT1          | 2895.00        | 6.42         | 0.75         | -0.16       |
| 50020.00 K19 | M-022909- thrombosp    | 80731.00  | THSD7B        | 3563.00        | 8.45         | 1.28         | 0.27        |
| 50020.00 K20 | M-012362- synapsin I   | 6853.00   | SYN1          | 3995.00        | 12.54        | 5.37         | 1.13        |
| 50020.00 K21 | M-027602- kinesin far  | 23046.00  | KIF21B        | 4657.00        | 12.11        | 4.94         | 1.04        |
| 50020.00 K23 | M-011305- karyopheri   | 3836.00   | KPNA1         | 4061.00        | 5.15         | 2.02         | -0.42       |
| 50020.00 L02 | M-003874- B-cell CLL/I | 602.00    | BCL3          | 3726.00        | 7.73         | 0.56         | 0.12        |
| 50020.00 L04 | M-004384- BCL2-like 2  | 599.00    | BCL2L2        | 2187.00        | 11.84        | 4.67         | 0.98        |
| 50020.00 L05 | M-011214- aquaporin    | 343.00    | AQP8          | 5132.00        | 13.74        | 6.57         | 1.38        |
| 50020.00 L06 | M-004385- BCL2-like 1  | 79370.00  | BCL2L14       | 4945.00        | 13.73        | 6.56         | 1.38        |
| 50020.00 L07 | M-007768- aquaporin    | 366.00    | <u>AQP9</u>   | <u>3414.00</u> | <u>19.71</u> | <u>12.54</u> | <u>2.64</u> |
| 50020.00 L08 | M-004383- BCL2-like 1  | 10018.00  | BCL2L11       | 5722.00        | 8.04         | 0.87         | 0.18        |
| 50020.00 L09 | M-011580- ADP-ribosy   | 375.00    | ARF1          | 2511.00        | 10.51        | 3.34         | 0.70        |
| 50020.00 L10 | M-004382- BCL2-like 1  | 10017.00  | BCL2L10       | 2319.00        | 11.43        | 4.26         | 0.90        |
| 50020.00 L11 | M-011581- ADP-ribosy   | 377.00    | ARF3          | 3869.00        | 9.51         | 2.34         | 0.49        |
| 50020.00 L12 | M-003458- BCL2-like 1  | 598.00    | BCL2L1        | 2871.00        | 4.46         | 2.71         | -0.57       |
| 50020.00 L13 | M-011582- ADP-ribosy   | 378.00    | ARF4          | 3258.00        | 8.87         | 1.70         | 0.36        |
| 50020.00 L14 | M-003306- BCL2-relate  | 597.00    | BCL2A1        | 5062.00        | 12.82        | 5.65         | 1.19        |
| 50020.00 L15 | M-011584- ADP-ribosy   | 381.00    | ARF5          | 3461.00        | 4.39         | 2.78         | -0.58       |
| 50020.00 L16 | M-013030- BRCA2 and    | 56647.00  | BCCIP         | 2127.00        | 2.59         | 4.58         | -0.96       |

|              |                        |           |                 |                |              |              |       |
|--------------|------------------------|-----------|-----------------|----------------|--------------|--------------|-------|
| 50020.00 L17 | M-004008-ADP-ribosy    | 382.00    | ARF6            | 2907.00        | 6.23         | 0.94         | -0.20 |
| 50020.00 L18 | M-010341- breast carc  | 8537.00   | BCAS1           | 3420.00        | 4.33         | 2.84         | -0.60 |
| 50020.00 L19 | M-013025- low density  | 26119.00  | LDLRAP1         | 5132.00        | 11.77        | 4.60         | 0.97  |
| 50020.00 L20 | M-020465- breast can   | 9564.00   | BCAR1           | 3706.00        | 3.99         | 3.18         | -0.67 |
| 50020.00 L21 | M-003860- ras homolc   | 387.00    | <u>RHOA</u>     | <u>4551.00</u> | <u>25.20</u> | <b>18.03</b> | 3.79  |
| 50020.00 L23 | M-007794- Rho family   | 390.00    | RND3            | 3223.00        | 1.68         | 5.49         | -1.15 |
| 50020.00 M02 | M-019369- steroidoge   | 6770.00   | STAR            | 2140.00        | 0.33         | 6.84         | -1.44 |
| 50020.00 M04 | M-007620- solute carri | 6546.00   | SLC8A1          | 5446.00        | 12.93        | 5.76         | 1.21  |
| 50020.00 M05 | M-004702- karyopheri   | 3838.00   | KPNA2           | 2232.00        | 2.42         | 4.75         | -1.00 |
| 50020.00 M06 | M-007486- solute carri | 292.00    | SLC25A5         | 3440.00        | 2.79         | 4.38         | -0.92 |
| 50020.00 M07 | M-011306- karyopheri   | 3839.00   | KPNA3           | 4475.00        | 4.74         | 2.43         | -0.51 |
| 50020.00 M08 | M-007483- solute carri | 9481.00   | SLC25A27        | 4487.00        | 0.42         | 6.75         | -1.42 |
| 50020.00 M09 | M-017523- karyopheri   | 3837.00   | KPNB1           | 2059.00        | 3.06         | 4.11         | -0.86 |
| 50020.00 M10 | M-007480- solute carri | 788.00    | SLC25A20        | 4711.00        | 1.59         | 5.58         | -1.17 |
| 50020.00 M11 | M-011308- transportin  | 3842.00   | TNPO1           | 2947.00        | 2.55         | 4.63         | -0.97 |
| 50020.00 M12 | M-007478- solute carri | 60386.00  | SLC25A19        | 3435.00        | 14.64        | 7.47         | 1.57  |
| 50020.00 M13 | M-003679- lipocalin 2  | 3934.00   | LCN2            | 3004.00        | 3.70         | 3.47         | -0.73 |
| 50020.00 M14 | M-007474- solute carri | 10166.00  | SLC25A15        | 2386.00        | 2.26         | 4.91         | -1.03 |
| 50020.00 M15 | M-004501- myeloid ce   | 4170.00   | MCL1            | 3538.00        | 4.83         | 2.34         | -0.49 |
| 50020.00 M16 | M-007472- solute carri | 10165.00  | SLC25A13        | 4089.00        | 6.14         | 1.03         | -0.22 |
| 50020.00 M17 | M-008301- microsoma    | 4547.00   | MTTP            | 4548.00        | 8.97         | 1.80         | 0.38  |
| 50020.00 M18 | M-007468- solute carri | 6576.00   | SLC25A1         | 3484.00        | 4.33         | 2.84         | -0.60 |
| 50020.00 M19 | M-010562- neighbor o   | 10230.00  | NBR2            | 3740.00        | 2.57         | 4.60         | -0.97 |
| 50020.00 M20 | M-007423- solute carri | 10560.00  | SLC19A2         | 3741.00        | 4.04         | 3.13         | -0.66 |
| 50020.00 M21 | M-005283- nucleopori   | 9972.00   | NUP153          | 3812.00        | 4.28         | 2.89         | -0.61 |
| 50020.00 M23 | M-013898- p53-regula   | 63970.00  | P53AIP1         | 3108.00        | 1.64         | 5.53         | -1.16 |
| 50020.00 N02 | M-013346- Bardet-Bier  | 55212.00  | BBS7            | 3510.00        | 5.87         | 1.30         | -0.27 |
| 50020.00 N04 | M-013649- Bardet-Bier  | 585.00    | BBS4            | 4357.00        | 4.36         | 2.81         | -0.59 |
| 50020.00 N05 | M-009427- Rho GTPas    | 23779.00  | ARHGAP8         | 6114.00        | 16.60        | 9.43         | 1.98  |
| 50020.00 N06 | M-010080- Bardet-Bier  | 583.00    | BBS2            | 5398.00        | 10.89        | 3.72         | 0.78  |
| 50020.00 N07 | M-013460- Rho guanin   | 9639.00   | <u>ARHGEF10</u> | <u>3463.00</u> | <u>14.81</u> | 7.64         | 1.61  |
| 50020.00 N08 | M-019180- Bardet-Bier  | 582.00    | BBS1            | 5431.00        | 14.33        | 7.16         | 1.51  |
| 50020.00 N09 | M-009731- Rho guanin   | 22899.00  | ARHGEF15        | 4463.00        | 8.54         | 1.37         | 0.29  |
| 50020.00 N10 | M-004380- BCL2 bindin  | 27113.00  | BBC3            | 2491.00        | 2.93         | 4.24         | -0.89 |
| 50020.00 N11 | M-010234- Rho guanin   | 27237.00  | ARHGEF16        | 3522.00        | 5.08         | 2.09         | -0.44 |
| 50020.00 N12 | M-003308- BCL2-assoc   | 581.00    | BAX             | 3448.00        | 1.68         | 5.49         | -1.15 |
| 50020.00 N13 | M-020314- Cdc42 guar   | 23229.00  | ARHGEF9         | 3870.00        | 4.81         | 2.36         | -0.50 |
| 50020.00 N14 | M-019008- brain abun   | 10409.00  | BASP1           | 3173.00        | 5.14         | 2.03         | -0.43 |
| 50020.00 N15 | M-006374- ras homolc   | 171177.00 | RHOV            | 4184.00        | 3.30         | 3.87         | -0.81 |
| 50020.00 N16 | M-010740- breast can   | 317716.00 | RP11-49G1       | 5898.00        | 7.51         | 0.34         | 0.07  |
| 50020.00 N17 | M-012408-ADP-ribosy    | 26225.00  | ARL5A           | 4338.00        | 9.77         | 2.60         | 0.55  |
| 50020.00 N18 | M-012395- BarH-like h  | 8538.00   | BARX2           | 3469.00        | 3.95         | 3.22         | -0.68 |
| 50020.00 N19 | M-020731-ADP-ribosy    | 51329.00  | ARL6IP4         | 4372.00        | 11.09        | 3.92         | 0.83  |
| 50020.00 N20 | M-013301- B-cell rece  | 55973.00  | BCAP29          | 4760.00        | 5.86         | 1.31         | -0.27 |
| 50020.00 N21 | M-012263- actin relate | 10552.00  | ARPC1A          | 2873.00        | 7.38         | 0.21         | 0.04  |
| 50020.00 N23 | M-008571- actin relate | 10093.00  | ARPC4           | 4374.00        | 5.17         | 2.00         | -0.42 |
| 50020.00 O02 | M-024405- SEC24 relat  | 10802.00  | SEC24A          | 3550.00        | 3.69         | 3.48         | -0.73 |

|              |                        |           |         |         |       |         |       |
|--------------|------------------------|-----------|---------|---------|-------|---------|-------|
| 50020.00 O04 | M-019245- SEC14-like   | 266629.00 | SEC14L3 | 2722.00 | 13.30 | 6.13    | 1.29  |
| 50020.00 O05 | M-010615- PDZ domai    | 5174.00   | PDZK1   | 2358.00 | 2.88  | 4.29    | -0.90 |
| 50020.00 O06 | M-011386- SEC14-like   | 6397.00   | SEC14L1 | 3503.00 | 3.17  | 4.00    | -0.84 |
| 50020.00 O07 | M-010553- phosphopr    | 8682.00   | PEA15   | 4060.00 | 5.74  | 1.43    | -0.30 |
| 50020.00 O08 | M-006502- sodium cha   | 6334.00   | SCN8A   | 4629.00 | 8.64  | 1.47    | 0.31  |
| 50020.00 O09 | M-006288- polycystic l | 5311.00   | PKD2    | 3426.00 | 4.50  | 2.68    | -0.56 |
| 50020.00 O10 | M-010055- RAB9B, me    | 51209.00  | RAB9B   | 4609.00 | 8.92  | 1.75    | 0.37  |
| 50020.00 O11 | M-006289- polycystic l | 9033.00   | PKD2L1  | 2699.00 | 3.33  | 3.84    | -0.81 |
| 50020.00 O12 | M-008909- RAB33B, m    | 83452.00  | RAB33B  | 2382.00 | 5.67  | 1.50    | -0.32 |
| 50020.00 O13 | M-006290- polycystic l | 27039.00  | PKD2L2  | 2614.00 | 6.77  | 0.40    | -0.08 |
| 50020.00 O14 | M-008206- RAB33A, m    | 9363.00   | RAB33A  | 4231.00 | 2.79  | 4.38    | -0.92 |
| 50020.00 O15 | M-006291- polycystic l | 10343.00  | PKDREJ  | 4632.00 | 16.13 | 8.96    | 1.88  |
| 50020.00 O16 | M-010366- RAB25, me    | 57111.00  | RAB25   | 4012.00 | 6.83  | 0.34    | -0.07 |
| 50020.00 O17 | M-003729- phospholip   | 5359.00   | PLSCR1  | 2764.00 | 5.68  | 1.49    | -0.31 |
| 50020.00 O18 | M-009789- RAB23, me    | 51715.00  | RAB23   | 4762.00 | 18.50 | 11.33   | 2.38  |
| 50020.00 O19 | M-010255- phospholip   | 57048.00  | PLSCR3  | 5701.00 | 31.07 | 23.90   | 5.03  |
| 50020.00 O20 | M-009450- RAB21, me    | 23011.00  | RAB21   | 2857.00 | 8.61  | 1.44    | 0.30  |
| 50020.00 O21 | M-006474- RAB17, me    | 64284.00  | RAB17   | 1716.00 | 5.54  | 1.63    | -0.34 |
| 50020.00 O23 | M-008317- RAB20, me    | 55647.00  | RAB20   | 2221.00 | 9.55  | 2.38    | 0.50  |
| 50020.00 P02 | M-013093- BTG3 assoc   | 54971.00  | BANP    | 1771.00 | 3.44  | 3.73    | -0.78 |
| 50020.00 P04 | M-003305- BCL2-antag   | 578.00    | BAK1    | 2045.00 | 17.21 | 10.04   | 2.11  |
| 50020.00 P05 | M-012080- actin relate | 10092.00  | ARPC5   | 4771.00 | 11.03 | 3.86    | 0.81  |
| 50020.00 P06 | M-012206- BAI1-assoc   | 10458.00  | BAIAP2  | 2730.00 | 1.90  | 5.27    | -1.11 |
| 50020.00 P07 | M-008578- arylsulfata  | 415.00    | ARSE    | 2657.00 | 1.17  | 6.00    | -1.26 |
| 50020.00 P08 | M-003871- BCL2-assoc   | 573.00    | BAG1    | 2856.00 | 9.14  | 1.97    | 0.41  |
| 50020.00 P09 | M-009575- ankyrin rep  | 51676.00  | ASB2    | 2701.00 | 2.22  | 4.95    | -1.04 |
| 50020.00 P10 | M-004366- beta-2-mic   | 567.00    | B2M     | 2170.00 | 2.53  | 4.64    | -0.97 |
| 50020.00 P11 | M-013268- asialoglyco  | 432.00    | ASGR1   | 2119.00 | 6.09  | 1.08    | -0.23 |
| 50020.00 P12 | M-013653- AXIN1 up-r   | 64651.00  | AXUD1   | 1188.00 | 6.06  | 1.11    | -0.23 |
| 50020.00 P13 | M-008840- argininosuc  | 435.00    | ASL     | 3360.00 | 10.42 | 3.25    | 0.68  |
| 50020.00 P14 | M-006524- alpha thala  | 546.00    | ATRX    | 3838.00 | 16.36 | 9.19    | 1.93  |
| 50020.00 P15 | M-016255- asp (abnor)  | 259266.00 | ASPM    | 2946.00 | 5.13  | 2.04    | -0.43 |
| 50020.00 P16 | M-022341- ATPase, Cl   | 57198.00  | ATP8B2  | 3919.00 | 9.39  | 2.22    | 0.47  |
| 50020.00 P17 | M-006489- alveolar so  | 79058.00  | ASPSCR1 | 4706.00 | 9.80  | 2.63    | 0.55  |
| 50020.00 P18 | M-012733- ATP syntha   | 10476.00  | ATP5H   | 4445.00 | 8.41  | 1.24    | 0.26  |
| 50020.00 P19 | M-009871- activating t | 1386.00   | ATF2    | 2793.00 | 11.42 | 4.25    | 0.89  |
| 50020.00 P20 | M-012705- ATP syntha   | 509.00    | ATP5C1  | 2501.00 | 7.76  | 0.59    | 0.12  |
| 50020.00 P21 | M-014542- activating t | 80063.00  | ATF7IP2 | 2919.00 | 20.45 | 13.28   | 2.79  |
| 50020.00 P23 | M-004082- ATPase, Ca   | 488.00    | ATP2A2  | 1638.00 | 4.21  | 2.96    | -0.62 |
|              |                        |           | mdn     | 3418.50 | 7.17  | 3.21    |       |
|              |                        |           | 3mad    |         |       | 9.64    |       |
|              |                        |           | MADc    |         |       | 4.75    |       |
| 50020.00 C22 |                        | 0.94      |         |         |       |         |       |
| 50020.00 D22 |                        |           |         | 3171.00 | 34.56 | 4700.00 | 37.47 |
| 50020.00 E22 |                        |           |         | 3486.00 | 31.47 | 5206.00 | 31.66 |
| 50020.00 F22 |                        |           |         | 4047.00 | 44.45 | 5298.00 | 44.26 |
|              |                        |           |         | 3912.00 | 42.41 |         |       |

|              |           |         |       |         |       |
|--------------|-----------|---------|-------|---------|-------|
|              | mn        | 3654.00 | 38.22 | 5068.00 | 37.80 |
| 50020.00 G22 | sd        | 401.05  | 6.20  | 322.00  | 6.31  |
| 50020.00 H22 |           | 1667.00 | 5.04  | 1053.00 | 2.56  |
| 50020.00 I22 |           | 1828.00 | 5.03  | 1680.00 | 7.20  |
| 50020.00 J22 |           | 2082.00 | 2.79  | 1388.00 | 6.34  |
|              |           | 2144.00 | 3.22  | 2358.00 | 7.04  |
|              | mn        | 1930.25 | 4.02  | 1619.75 | 5.79  |
|              | sd        | 222.47  | 1.19  | 554.84  | 2.18  |
|              | 3psSD     |         | 18.60 |         | 18.93 |
|              | 3ngSD     |         | 3.56  |         | 6.54  |
|              | SumSD     |         | 22.16 |         | 25.47 |
|              | DiffMn    |         | 34.20 |         | 32.01 |
|              | SmovrDiff |         | 0.65  |         | 0.80  |
|              | 1minus    |         | 0.35  |         | 0.20  |

| Cell Count | % inf | Abs Dev | rZ    | Cell Count | % inf | Abs Dev | rZ    |
|------------|-------|---------|-------|------------|-------|---------|-------|
| 3212.00    | 8.09  | 3.34    | 1.11  | 2089.00    | 10.77 | 5.64    | 1.62  |
| 1926.00    | 2.34  | 2.41    | -0.80 | 2081.00    | 4.81  | 0.32    | -0.09 |
| 3470.00    | 2.82  | 1.93    | -0.64 | 2771.00    | 3.61  | 1.52    | -0.44 |
| 2307.00    | 6.76  | 2.01    | 0.67  | 2855.00    | 10.86 | 5.73    | 1.64  |
| 4872.00    | 2.77  | 1.98    | -0.66 | 2874.00    | 3.10  | 2.03    | -0.58 |
| 3306.00    | 1.33  | 3.42    | -1.14 | 2723.00    | 4.77  | 0.36    | -0.10 |
| 2848.00    | 1.58  | 3.17    | -1.05 | 1712.00    | 1.40  | 3.73    | -1.07 |
| 2016.00    | 2.53  | 2.22    | -0.74 | 2023.00    | 4.30  | 0.83    | -0.24 |
| 3022.00    | 7.74  | 2.99    | 1.00  | 2356.00    | 10.70 | 5.57    | 1.60  |
| 3067.00    | 0.95  | 3.80    | -1.27 | 2712.00    | 5.20  | 0.07    | 0.02  |
| 3249.00    | 3.69  | 1.06    | -0.35 | 2317.00    | 5.18  | 0.05    | 0.01  |
| 3106.00    | 5.67  | 0.92    | 0.30  | 3351.00    | 9.16  | 4.03    | 1.16  |
| 1500.00    | 4.40  | 0.35    | -0.12 | 1358.00    | 10.90 | 5.77    | 1.66  |
| 2125.00    | 2.26  | 2.49    | -0.83 | 1960.00    | 2.40  | 2.73    | -0.78 |
| 2479.00    | 2.54  | 2.21    | -0.73 | 3680.00    | 5.71  | 0.58    | 0.17  |
| 2839.00    | 4.93  | 0.18    | 0.06  | 1718.00    | 3.73  | 1.40    | -0.40 |
| 4235.00    | 7.30  | 2.55    | 0.85  | 3525.00    | 6.61  | 1.48    | 0.42  |
| 4156.00    | 11.12 | 6.37    | 2.12  | 3437.00    | 11.64 | 6.51    | 1.87  |
| 1179.00    | 6.87  | 2.12    | 0.71  | 1720.00    | 6.80  | 1.67    | 0.48  |
| 1564.00    | 4.54  | 0.21    | -0.07 | 1574.00    | 2.41  | 2.72    | -0.78 |
| 2751.00    | 6.87  | 2.12    | 0.71  | 2037.00    | 7.90  | 2.77    | 0.80  |
| 1348.00    | 6.45  | 1.70    | 0.57  | 883.00     | 3.51  | 1.62    | -0.47 |
| 2420.00    | 8.60  | 3.85    | 1.28  | 2752.00    | 14.57 | 9.44    | 2.71  |
| 5427.00    | 8.59  | 3.84    | 1.28  | 3623.00    | 4.42  | 0.71    | -0.21 |
| 5154.00    | 13.78 | 9.03    | 3.00  | 4082.00    | 10.56 | 5.43    | 1.56  |
| 3139.00    | 5.26  | 0.51    | 0.17  | 1513.00    | 1.26  | 3.87    | -1.11 |
| 3025.00    | 6.35  | 1.60    | 0.53  | 2309.00    | 6.41  | 1.28    | 0.37  |
| 2053.00    | 11.35 | 6.60    | 2.20  | 2121.00    | 10.00 | 4.87    | 1.40  |
| 5044.00    | 17.39 | 12.64   | 4.20  | 2705.00    | 11.35 | 6.22    | 1.79  |
| 2940.00    | 11.46 | 6.71    | 2.23  | 2897.00    | 7.01  | 1.88    | 0.54  |
| 1762.00    | 4.31  | 0.44    | -0.15 | 1640.00    | 1.59  | 3.54    | -1.02 |
| 3964.00    | 12.31 | 7.56    | 2.51  | 2629.00    | 5.21  | 0.08    | 0.02  |
| 2316.00    | 3.41  | 1.34    | -0.45 | 2699.00    | 5.04  | 0.09    | -0.03 |
| 3960.00    | 6.01  | 1.26    | 0.42  | 2005.00    | 1.40  | 3.73    | -1.07 |
| 4053.00    | 4.07  | 0.68    | -0.23 | 3263.00    | 1.44  | 3.69    | -1.06 |
| 3880.00    | 10.57 | 5.82    | 1.93  | 2575.00    | 4.85  | 0.28    | -0.08 |
| 5247.00    | 16.26 | 11.51   | 3.83  | 3506.00    | 3.19  | 1.94    | -0.56 |
| 2415.00    | 2.40  | 2.35    | -0.78 | 1590.00    | 0.25  | 4.88    | -1.40 |
| 4430.00    | 22.53 | 17.78   | 5.91  | 4515.00    | 7.24  | 2.11    | 0.61  |
| 3516.00    | 6.29  | 1.54    | 0.51  | 2626.00    | 0.46  | 4.67    | -1.34 |
| 3288.00    | 2.34  | 2.41    | -0.80 | 5351.00    | 4.60  | 0.53    | -0.15 |
| 2914.00    | 2.47  | 2.28    | -0.76 | 3374.00    | 5.22  | 0.09    | 0.02  |
| 4156.00    | 5.49  | 0.74    | 0.24  | 3997.00    | 8.06  | 2.93    | 0.84  |
| 3564.00    | 0.84  | 3.91    | -1.30 | 2176.00    | 0.92  | 4.21    | -1.21 |
| 4099.00    | 4.42  | 0.33    | -0.11 | 2405.00    | 1.95  | 3.18    | -0.91 |
| 5160.00    | 10.33 | 5.58    | 1.86  | 3039.00    | 4.87  | 0.26    | -0.08 |



| <u>4186.00</u> | <u>8.05</u> | <u>3.30</u> | <u>1.10</u> | <u>2595.00</u> | <u>12.25</u> | <u>7.12</u> | <u>2.04</u> y |
|----------------|-------------|-------------|-------------|----------------|--------------|-------------|---------------|
| 4083.00        | 2.40        | 2.35        | -0.78       | 2641.00        | 1.82         | 3.31        | -0.95         |
| 3534.00        | 5.18        | 0.43        | 0.14        | 2215.00        | 1.58         | 3.55        | -1.02         |
| 2034.00        | 2.21        | 2.54        | -0.84       | 1571.00        | 2.55         | 2.58        | -0.74         |
| 3644.00        | 2.09        | 2.66        | -0.89       | 2705.00        | 5.40         | 0.27        | 0.08          |
| 2259.00        | 3.94        | 0.81        | -0.27       | 1048.00        | 2.96         | 2.17        | -0.62         |
| 3076.00        | 1.07        | 3.68        | -1.22       | 1916.00        | 2.40         | 2.73        | -0.78         |
| 2689.00        | 4.31        | 0.44        | -0.15       | 1832.00        | 3.98         | 1.15        | -0.33         |
| 4243.00        | 2.90        | 1.85        | -0.62       | 3263.00        | 4.63         | 0.50        | -0.14         |
| 3631.00        | 6.61        | 1.86        | 0.62        | 2052.00        | 4.63         | 0.50        | -0.14         |
| 3331.00        | 8.65        | 3.90        | 1.30        | 2722.00        | 7.90         | 2.77        | 0.79          |
| 4377.00        | 5.03        | 0.28        | 0.09        | 3422.00        | 5.82         | 0.69        | 0.20          |
| 4425.00        | 4.84        | 0.09        | 0.03        | 2907.00        | 3.92         | 1.21        | -0.35         |
| 3279.00        | 7.47        | 2.72        | 0.91        | 2780.00        | 10.50        | 5.37        | 1.54          |
| 2675.00        | 1.31        | 3.44        | -1.14       | 3090.00        | 6.63         | 1.50        | 0.43          |
| 3451.00        | 2.09        | 2.66        | -0.89       | 2173.00        | 7.04         | 1.91        | 0.55          |
| 2920.00        | 6.99        | 2.24        | 0.74        | 1957.00        | 14.97        | 9.84        | 2.83          |
| 4003.00        | 3.52        | 1.23        | -0.41       | 2464.00        | 6.49         | 1.36        | 0.39          |
| 3987.00        | 2.68        | 2.07        | -0.69       | 2568.00        | 15.23        | 10.10       | 2.90          |
| 1272.00        | 1.49        | 3.26        | -1.08       | 776.00         | 5.03         | 0.10        | -0.03         |
| 2411.00        | 1.66        | 3.09        | -1.03       | 1278.00        | 6.96         | 1.83        | 0.53          |
| 2627.00        | 1.45        | 3.30        | -1.10       | 1280.00        | 7.42         | 2.29        | 0.66          |
| 2022.00        | 2.08        | 2.67        | -0.89       | 1548.00        | 7.62         | 2.49        | 0.72          |
| 3837.00        | 8.11        | 3.36        | 1.12        | 2332.00        | 19.25        | 14.12       | 4.05          |
| 4657.00        | 4.90        | 0.15        | 0.05        | 2963.00        | 13.43        | 8.30        | 2.38          |
| 2533.00        | 3.47        | 1.28        | -0.42       | 1703.00        | 24.02        | 18.89       | 5.42          |
| 4698.00        | 6.77        | 2.02        | 0.67        | 2389.00        | 10.80        | 5.67        | 1.63          |
| 3910.00        | 5.63        | 0.88        | 0.29        | 2366.00        | 17.96        | 12.83       | 3.68          |
| 4122.00        | 3.57        | 1.18        | -0.39       | 2226.00        | 3.46         | 1.67        | -0.48         |
| 3089.00        | 0.91        | 3.84        | -1.28       | 1791.00        | 4.41         | 0.72        | -0.21         |
| 4274.00        | 0.91        | 3.84        | -1.28       | 2327.00        | 3.18         | 1.95        | -0.56         |
| 2213.00        | 1.22        | 3.53        | -1.17       | 2232.00        | 11.11        | 5.98        | 1.72          |
| 5155.00        | 6.56        | 1.81        | 0.60        | 3063.00        | 7.48         | 2.35        | 0.67          |
| 3567.00        | 2.94        | 1.81        | -0.60       | 3327.00        | 5.14         | 0.01        | 0.00          |
| 3053.00        | 3.64        | 1.11        | -0.37       | 4513.00        | 14.98        | 9.85        | 2.83          |
| 3254.00        | 5.75        | 1.00        | 0.33        | 2798.00        | 2.68         | 2.45        | -0.70         |
| 3188.00        | 3.11        | 1.64        | -0.55       | 3003.00        | 4.26         | 0.87        | -0.25         |
| 3785.00        | 2.72        | 2.03        | -0.67       | 2419.00        | 2.73         | 2.40        | -0.69         |
| 2503.00        | 5.19        | 0.44        | 0.15        | 1862.00        | 0.91         | 4.22        | -1.21         |
| 2922.00        | 4.72        | 0.03        | -0.01       | 1342.00        | 3.58         | 1.55        | -0.45         |
| 3567.00        | 5.64        | 0.89        | 0.29        | 2131.00        | 0.99         | 4.14        | -1.19         |
| 2830.00        | 7.14        | 2.39        | 0.79        | 1857.00        | 2.37         | 2.76        | -0.79         |
| 2071.00        | 7.92        | 3.17        | 1.05        | 1656.00        | 3.20         | 1.93        | -0.55         |
| 2254.00        | 6.26        | 1.51        | 0.50        | 1765.00        | 3.12         | 2.01        | -0.58         |
| 2551.00        | 1.45        | 3.30        | -1.10       | 1970.00        | 3.15         | 1.98        | -0.57         |
| 1781.00        | 5.33        | 0.58        | 0.19        | 1528.00        | 5.17         | 0.04        | 0.01          |
| 4008.00        | 8.36        | 3.61        | 1.20        | 1738.00        | 6.21         | 1.08        | 0.31          |



|                |              |             |             |                |              |              |               |
|----------------|--------------|-------------|-------------|----------------|--------------|--------------|---------------|
| 2475.00        | 4.08         | 0.67        | -0.22       | 1794.00        | 5.41         | 0.28         | 0.08          |
| 3068.00        | 4.14         | 0.61        | -0.20       | 2265.00        | 3.89         | 1.24         | -0.36         |
| 4354.00        | 5.47         | 0.72        | 0.24        | 2534.00        | 4.97         | 0.16         | -0.05         |
| 4936.00        | 5.11         | 0.36        | 0.12        | 2193.00        | 7.30         | 2.17         | 0.62          |
| 4672.00        | 6.93         | 2.18        | 0.73        | 2427.00        | 6.26         | 1.13         | 0.32          |
| 3651.00        | 9.56         | 4.81        | 1.60        | 1850.00        | 5.84         | 0.71         | 0.20          |
| 3541.00        | 4.01         | 0.74        | -0.25       | 2710.00        | 2.18         | 2.95         | -0.85         |
| 4344.00        | 1.98         | 2.77        | -0.92       | 4322.00        | 2.36         | 2.77         | -0.80         |
| 3738.00        | 3.64         | 1.11        | -0.37       | 3167.00        | 4.33         | 0.80         | -0.23         |
| 3738.00        | 5.35         | 0.60        | 0.20        | 3042.00        | 7.59         | 2.46         | 0.71          |
| 3986.00        | 3.49         | 1.26        | -0.42       | 2947.00        | 5.77         | 0.64         | 0.18          |
| 2827.00        | 5.20         | 0.45        | 0.15        | 2127.00        | 3.10         | 2.03         | -0.58         |
| <u>3961.00</u> | <u>10.83</u> | <u>6.08</u> | <u>2.02</u> | <u>2805.00</u> | <u>17.79</u> | <u>12.66</u> | <u>3.63</u> y |
| 2954.00        | 1.56         | 3.19        | -1.06       | 1923.00        | 4.52         | 0.61         | -0.17         |
| 3557.00        | 9.00         | 4.25        | 1.41        | 2184.00        | 8.06         | 2.93         | 0.84          |
| 3051.00        | 6.36         | 1.61        | 0.54        | 1748.00        | 8.12         | 2.99         | 0.86          |
| 3970.00        | 1.71         | 3.04        | -1.01       | 2698.00        | 4.34         | 0.79         | -0.23         |
| 2521.00        | 2.98         | 1.78        | -0.59       | 1805.00        | 3.21         | 1.92         | -0.55         |
| 2060.00        | 1.55         | 3.20        | -1.06       | 1408.00        | 1.99         | 3.14         | -0.90         |
| 2392.00        | 5.10         | 0.35        | 0.12        | 1840.00        | 5.22         | 0.09         | 0.02          |
| 4336.00        | 2.84         | 1.91        | -0.64       | 1947.00        | 1.85         | 3.28         | -0.94         |
| 1405.00        | 7.54         | 2.79        | 0.93        | 627.00         | 3.35         | 1.78         | -0.51         |
| 3717.00        | 7.53         | 2.78        | 0.93        | 1585.00        | 4.35         | 0.78         | -0.22         |
| <u>4719.00</u> | <u>11.93</u> | <u>7.18</u> | <u>2.39</u> | <u>2998.00</u> | <u>8.61</u>  | <u>3.48</u>  | <u>1.00</u> y |
| 4205.00        | 7.66         | 2.91        | 0.97        | 2877.00        | 6.26         | 1.13         | 0.32          |
| 3283.00        | 9.29         | 4.54        | 1.51        | 1837.00        | 2.67         | 2.46         | -0.71         |
| 4525.00        | 1.68         | 3.07        | -1.02       | 2932.00        | 0.78         | 4.35         | -1.25         |
| 4661.00        | 4.44         | 0.31        | -0.10       | 4158.00        | 3.08         | 2.05         | -0.59         |
| 2304.00        | 3.60         | 1.15        | -0.38       | 2546.00        | 2.83         | 2.30         | -0.66         |
| 2644.00        | 3.14         | 1.61        | -0.54       | 3049.00        | 2.00         | 3.13         | -0.90         |
| 1591.00        | 0.38         | 4.37        | -1.45       | 2526.00        | 1.03         | 4.10         | -1.18         |
| 1675.00        | 3.52         | 1.23        | -0.41       | 1009.00        | 5.45         | 0.32         | 0.09          |
| 3238.00        | 4.60         | 0.15        | -0.05       | 3457.00        | 5.93         | 0.80         | 0.23          |
| 1938.00        | 4.44         | 0.31        | -0.10       | 1690.00        | 6.33         | 1.20         | 0.34          |
| 2639.00        | 0.80         | 3.95        | -1.32       | 2419.00        | 1.49         | 3.64         | -1.05         |
| <u>2476.00</u> | <u>10.62</u> | <u>5.87</u> | <u>1.95</u> | <u>1910.00</u> | <u>10.42</u> | <u>5.29</u>  | <u>1.52</u>   |
| 2554.00        | 1.84         | 2.91        | -0.97       | 3408.00        | 3.61         | 1.52         | -0.44         |
| 2690.00        | 1.41         | 3.34        | -1.11       | 3058.00        | 8.08         | 2.95         | 0.85          |
| 2156.00        | 2.41         | 2.34        | -0.78       | 1902.00        | 1.68         | 3.45         | -0.99         |
| 2078.00        | 2.45         | 2.30        | -0.76       | 1581.00        | 3.86         | 1.27         | -0.37         |
| 3259.00        | 3.90         | 0.85        | -0.28       | 3287.00        | 5.81         | 0.68         | 0.20          |
| 3293.00        | 3.58         | 1.17        | -0.39       | 3218.00        | 6.74         | 1.61         | 0.46          |
| <u>4710.00</u> | <u>12.65</u> | <u>7.90</u> | <u>2.63</u> | <u>3652.00</u> | <u>11.69</u> | <u>6.56</u>  | <u>1.88</u> y |
| 3095.00        | 6.33         | 1.58        | 0.53        | 2663.00        | 5.93         | 0.80         | 0.23          |
| 3086.00        | 6.68         | 1.93        | 0.64        | 3230.00        | 9.72         | 4.59         | 1.32          |
| 3658.00        | 10.39        | 5.64        | 1.88        | 3269.00        | 5.93         | 0.80         | 0.23          |
| 1978.00        | 2.58         | 2.17        | -0.72       | 2067.00        | 7.31         | 2.18         | 0.62          |

|                |              |              |             |                |              |             |               |
|----------------|--------------|--------------|-------------|----------------|--------------|-------------|---------------|
| 2510.00        | 1.24         | 3.51         | -1.17       | 2034.00        | 0.74         | 4.39        | -1.26         |
| 4531.00        | 4.02         | 0.73         | -0.24       | 3508.00        | 5.07         | 0.06        | -0.02         |
| 3102.00        | 6.16         | 1.41         | 0.47        | 2789.00        | 5.56         | 0.43        | 0.12          |
| 2127.00        | 1.55         | 3.20         | -1.06       | 2791.00        | 2.58         | 2.55        | -0.73         |
| 2734.00        | 5.71         | 0.96         | 0.32        | 1923.00        | 4.89         | 0.24        | -0.07         |
| 3375.00        | 10.34        | 5.59         | 1.86        | 3630.00        | 7.33         | 2.20        | 0.63          |
| 3020.00        | 2.78         | 1.97         | -0.65       | 3036.00        | 5.83         | 0.70        | 0.20          |
| 2206.00        | 2.99         | 1.76         | -0.58       | 1930.00        | 3.78         | 1.35        | -0.39         |
| 2931.00        | 4.67         | 0.08         | -0.03       | 3091.00        | 7.99         | 2.86        | 0.82          |
| 2420.00        | 6.41         | 1.66         | 0.55        | 2743.00        | 9.41         | 4.28        | 1.23          |
| 1342.00        | 4.40         | 0.35         | -0.12       | 1427.00        | 4.41         | 0.72        | -0.21         |
| 2050.00        | 4.83         | 0.08         | 0.03        | 1389.00        | 0.86         | 4.27        | -1.23         |
| 3293.00        | 6.01         | 1.26         | 0.42        | 3790.00        | 7.12         | 1.99        | 0.57          |
| 3171.00        | 4.95         | 0.20         | 0.07        | 3158.00        | 4.62         | 0.51        | -0.15         |
| 3590.00        | 8.27         | 3.52         | 1.17        | 2684.00        | 2.98         | 2.15        | -0.62         |
| 3821.00        | 15.02        | 10.27        | 3.42        | 3688.00        | 6.89         | 1.76        | 0.50          |
| 3373.00        | 7.71         | 2.96         | 0.98        | 4062.00        | 8.81         | 3.68        | 1.06          |
| 2938.00        | 12.49        | 7.74         | 2.57        | 3646.00        | 6.83         | 1.70        | 0.49          |
| 4591.00        | 9.08         | 4.33         | 1.44        | 5041.00        | 7.44         | 2.31        | 0.66          |
| 2046.00        | 1.71         | 3.04         | -1.01       | 2085.00        | 1.97         | 3.16        | -0.91         |
| 3187.00        | 4.49         | 0.26         | -0.09       | 4098.00        | 5.10         | 0.03        | -0.01         |
| 2764.00        | 4.59         | 0.16         | -0.05       | 3147.00        | 2.86         | 2.27        | -0.65         |
| 2473.00        | 3.68         | 1.07         | -0.36       | 2144.00        | 1.40         | 3.73        | -1.07         |
| 4324.00        | 9.53         | 4.78         | 1.59        | 3194.00        | 7.11         | 1.98        | 0.57          |
| 2847.00        | 4.88         | 0.13         | 0.04        | 2952.00        | 6.13         | 1.00        | 0.29          |
| 3344.00        | 5.62         | 0.87         | 0.29        | 2826.00        | 5.10         | 0.03        | -0.01         |
| 1867.00        | 1.55         | 3.20         | -1.06       | 2267.00        | 4.28         | 0.85        | -0.24         |
| 1512.00        | 4.30         | 0.45         | -0.15       | 1232.00        | 0.89         | 4.24        | -1.22         |
| 2472.00        | 2.14         | 2.61         | -0.87       | 2384.00        | 2.64         | 2.49        | -0.71         |
| 2505.00        | 6.43         | 1.68         | 0.56        | 1920.00        | 2.92         | 2.21        | -0.64         |
| 2398.00        | 7.01         | 2.26         | 0.75        | 2637.00        | 7.17         | 2.04        | 0.58          |
| 2152.00        | 5.72         | 0.97         | 0.32        | 2835.00        | 1.41         | 3.72        | -1.07         |
| 3143.00        | 9.07         | 4.32         | 1.44        | 2499.00        | 5.52         | 0.39        | 0.11          |
| 4473.00        | 9.28         | 4.53         | 1.51        | 3679.00        | 4.59         | 0.54        | -0.15         |
| <u>5280.00</u> | <u>17.56</u> | <u>12.81</u> | <u>4.26</u> | <u>4163.00</u> | <u>13.60</u> | <u>8.47</u> | <u>2.43</u> y |
| 3157.00        | 5.96         | 1.21         | 0.40        | 3472.00        | 6.13         | 1.00        | 0.29          |
| 3428.00        | 4.46         | 0.29         | -0.10       | 3281.00        | 3.99         | 1.14        | -0.33         |
| 3986.00        | 9.28         | 4.53         | 1.51        | 2954.00        | 3.59         | 1.54        | -0.44         |
| 2943.00        | 4.08         | 0.67         | -0.22       | 1898.00        | 3.21         | 1.92        | -0.55         |
| 3320.00        | 4.70         | 0.05         | -0.02       | 2334.00        | 1.37         | 3.76        | -1.08         |
| 2962.00        | 1.01         | 3.74         | -1.24       | 2564.00        | 2.03         | 3.10        | -0.89         |
| 4232.00        | 8.96         | 4.21         | 1.40        | 4686.00        | 11.72        | 6.59        | 1.89          |
| <u>2384.00</u> | <u>12.33</u> | <u>7.58</u>  | <u>2.52</u> | <u>2798.00</u> | <u>13.44</u> | <u>8.31</u> | <u>2.38</u> y |
| 1993.00        | 5.22         | 0.47         | 0.16        | 3400.00        | 5.35         | 0.22        | 0.06          |
| 2372.00        | 9.49         | 4.74         | 1.58        | 2292.00        | 8.94         | 3.81        | 1.09          |
| 1658.00        | 1.51         | 3.24         | -1.08       | 2525.00        | 4.16         | 0.97        | -0.28         |
| 1089.00        | 2.02         | 2.73         | -0.91       | 2524.00        | 2.73         | 2.40        | -0.69         |

|                |             |             |             |                |              |              |               |
|----------------|-------------|-------------|-------------|----------------|--------------|--------------|---------------|
| 2841.00        | 5.70        | 0.95        | 0.32        | 3571.00        | 10.00        | 4.87         | 1.40          |
| 1747.00        | 1.55        | 3.20        | -1.07       | 2100.00        | 2.90         | 2.23         | -0.64         |
| 1668.00        | 0.60        | 4.15        | -1.38       | 1775.00        | 2.42         | 2.71         | -0.78         |
| 1462.00        | 7.87        | 3.12        | 1.04        | 1640.00        | 7.93         | 2.80         | 0.80          |
| 3453.00        | 6.89        | 2.14        | 0.71        | 3008.00        | 11.07        | 5.94         | 1.70          |
| 3120.00        | 2.63        | 2.12        | -0.71       | 2491.00        | 2.25         | 2.88         | -0.83         |
| 2500.00        | 5.48        | 0.73        | 0.24        | 2944.00        | 3.77         | 1.36         | -0.39         |
| 1888.00        | 6.78        | 2.03        | 0.68        | 2919.00        | 12.74        | 7.61         | 2.19          |
| 3079.00        | 7.70        | 2.95        | 0.98        | 3704.00        | 7.05         | 1.92         | 0.55          |
| 1240.00        | 0.73        | 4.02        | -1.34       | 2126.00        | 6.96         | 1.83         | 0.53          |
| 2520.00        | 2.30        | 2.45        | -0.81       | 2241.00        | 2.32         | 2.81         | -0.81         |
| 4080.00        | 4.53        | 0.22        | -0.07       | 3180.00        | 1.86         | 3.27         | -0.94         |
| 2738.00        | 0.44        | 4.31        | -1.43       | 2253.00        | 1.86         | 3.27         | -0.94         |
| 3845.00        | 8.66        | 3.91        | 1.30        | 4375.00        | 2.56         | 2.57         | -0.74         |
| 1863.00        | 2.79        | 1.96        | -0.65       | 1521.00        | 0.39         | 4.74         | -1.36         |
| 3190.00        | 7.18        | 2.43        | 0.81        | 3239.00        | 2.41         | 2.72         | -0.78         |
| 3420.00        | 8.68        | 3.93        | 1.31        | 3532.00        | 2.66         | 2.47         | -0.71         |
| 2609.00        | 4.02        | 0.73        | -0.24       | 2454.00        | 1.96         | 3.17         | -0.91         |
| 1753.00        | 4.11        | 0.64        | -0.21       | 2175.00        | 1.84         | 3.29         | -0.95         |
| <u>3121.00</u> | <u>8.49</u> | <u>3.74</u> | <u>1.24</u> | <u>3361.00</u> | <u>12.82</u> | <u>7.69</u>  | <u>2.21</u> y |
| 1814.00        | 2.09        | 2.66        | -0.88       | 2302.00        | 2.48         | 2.65         | -0.76         |
| 2521.00        | 6.03        | 1.28        | 0.43        | 2115.00        | 6.38         | 1.25         | 0.36          |
| 1693.00        | 2.78        | 1.97        | -0.66       | 1457.00        | 1.92         | 3.21         | -0.92         |
| 2788.00        | 5.63        | 0.88        | 0.29        | 2022.00        | 2.18         | 2.95         | -0.85         |
| 1999.00        | 0.60        | 4.15        | -1.38       | 2077.00        | 0.34         | 4.79         | -1.38         |
| 3148.00        | 5.27        | 0.52        | 0.17        | 2553.00        | 3.56         | 1.57         | -0.45         |
| 1502.00        | 0.53        | 4.22        | -1.40       | 1702.00        | 1.94         | 3.19         | -0.92         |
| 4938.00        | 6.97        | 2.22        | 0.74        | 3785.00        | 5.31         | 0.18         | 0.05          |
| 2798.00        | 1.36        | 3.39        | -1.13       | 2679.00        | 1.72         | 3.41         | -0.98         |
| 4544.00        | 2.71        | 2.04        | -0.68       | 3174.00        | 2.80         | 2.33         | -0.67         |
| 2883.00        | 3.26        | 1.49        | -0.50       | 3338.00        | 2.49         | 2.64         | -0.76         |
| 3378.00        | 2.69        | 2.06        | -0.68       | 2827.00        | 5.16         | 0.03         | 0.01          |
| 4977.00        | 3.88        | 0.87        | -0.29       | 2771.00        | 1.66         | 3.47         | -1.00         |
| 2861.00        | 3.39        | 1.36        | -0.45       | 2118.00        | 5.15         | 0.02         | 0.00          |
| 2066.00        | 3.24        | 1.51        | -0.50       | 2231.00        | 4.66         | 0.47         | -0.13         |
| 4026.00        | 3.78        | 0.97        | -0.32       | 3214.00        | 6.57         | 1.44         | 0.41          |
| 3797.00        | 5.37        | 0.62        | 0.21        | 3881.00        | 6.67         | 1.54         | 0.44          |
| <u>1950.00</u> | <u>6.10</u> | <u>1.35</u> | <u>0.45</u> | <u>3956.00</u> | <u>16.81</u> | <u>11.68</u> | <u>3.35</u> y |
| 3742.00        | 1.79        | 2.96        | -0.98       | 5320.00        | 6.20         | 1.07         | 0.31          |
| 1351.00        | 9.18        | 4.43        | 1.47        | 1329.00        | 13.24        | 8.11         | 2.33          |
| 1818.00        | 5.06        | 0.31        | 0.10        | 1818.00        | 10.89        | 5.76         | 1.65          |
| 1957.00        | 8.12        | 3.37        | 1.12        | 1915.00        | 3.34         | 1.79         | -0.51         |
| 1909.00        | 3.93        | 0.82        | -0.27       | 1662.00        | 2.35         | 2.78         | -0.80         |
| 2347.00        | 4.22        | 0.53        | -0.18       | 1991.00        | 5.12         | 0.01         | 0.00          |
| 3277.00        | 5.16        | 0.41        | 0.14        | 3409.00        | 10.85        | 5.72         | 1.64          |
| 2014.00        | 4.07        | 0.68        | -0.23       | 2071.00        | 6.81         | 1.68         | 0.48          |
| 1397.00        | 1.15        | 3.60        | -1.20       | 1738.00        | 1.96         | 3.17         | -0.91         |

|                |              |              |             |                |              |              |               |
|----------------|--------------|--------------|-------------|----------------|--------------|--------------|---------------|
| 1744.00        | 7.97         | 3.22         | 1.07        | 1936.00        | 8.99         | 3.86         | 1.11          |
| 3206.00        | 3.06         | 1.69         | -0.56       | 2325.00        | 4.09         | 1.04         | -0.30         |
| 3272.00        | 7.24         | 2.49         | 0.83        | 3870.00        | 10.34        | 5.21         | 1.49          |
| 2387.00        | 5.95         | 1.20         | 0.40        | 2239.00        | 7.19         | 2.06         | 0.59          |
| <u>2238.00</u> | <u>17.16</u> | <u>12.41</u> | <u>4.13</u> | <u>2622.00</u> | <u>24.87</u> | <u>19.74</u> | <u>5.67</u> y |
| 2426.00        | 2.23         | 2.52         | -0.84       | 2197.00        | 4.55         | 0.58         | -0.17         |
| 1398.00        | 1.65         | 3.10         | -1.03       | 1925.00        | 2.75         | 2.38         | -0.68         |
| 4423.00        | 4.18         | 0.57         | -0.19       | 4232.00        | 7.49         | 2.36         | 0.68          |
| 1243.00        | 5.95         | 1.20         | 0.40        | 1736.00        | 5.36         | 0.23         | 0.06          |
| 1935.00        | 2.89         | 1.86         | -0.62       | 3636.00        | 3.77         | 1.36         | -0.39         |
| 3823.00        | 9.18         | 4.43         | 1.47        | 3971.00        | 10.27        | 5.14         | 1.48          |
| 2614.00        | 2.56         | 2.19         | -0.73       | 4026.00        | 1.86         | 3.27         | -0.94         |
| 929.00         | 2.48         | 2.27         | -0.76       | 1428.00        | 3.08         | 2.05         | -0.59         |
| 1771.00        | 1.36         | 3.39         | -1.13       | 2603.00        | 2.00         | 3.13         | -0.90         |
| 1805.00        | 3.77         | 0.98         | -0.33       | 2003.00        | 5.39         | 0.26         | 0.07          |
| 1841.00        | 4.78         | 0.03         | 0.01        | 1687.00        | 4.92         | 0.21         | -0.06         |
| 3379.00        | 4.38         | 0.37         | -0.12       | 2702.00        | 7.40         | 2.27         | 0.65          |
| 1100.00        | 3.27         | 1.48         | -0.49       | 1897.00        | 1.95         | 3.18         | -0.91         |
| 2345.00        | 5.12         | 0.37         | 0.12        | 2892.00        | 6.19         | 1.06         | 0.30          |
| 1946.00        | 7.86         | 3.11         | 1.04        | 3083.00        | 7.53         | 2.40         | 0.69          |
| 2123.00        | 6.64         | 1.89         | 0.63        | 3315.00        | 6.24         | 1.11         | 0.32          |
| 2338.00        | 5.73         | 0.98         | 0.33        | 3349.00        | 7.05         | 1.92         | 0.55          |
| 2500.00        | 8.84         | 4.09         | 1.36        | 3484.00        | 4.54         | 0.60         | -0.17         |
| 2572.00        | 5.02         | 0.27         | 0.09        | 3546.00        | 5.78         | 0.65         | 0.19          |
| 2558.00        | 6.49         | 1.74         | 0.58        | 4120.00        | 7.79         | 2.66         | 0.76          |
| 3105.00        | 1.48         | 3.27         | -1.09       | 3429.00        | 3.24         | 1.89         | -0.54         |
| 2239.00        | 5.18         | 0.43         | 0.14        | 2539.00        | 5.67         | 0.54         | 0.16          |
| 4041.00        | 6.81         | 2.06         | 0.68        | 4027.00        | 3.33         | 1.80         | -0.52         |
| 4441.00        | 8.62         | 3.87         | 1.29        | 3786.00        | 7.63         | 2.50         | 0.72          |
| 3283.00        | 11.58        | <u>6.83</u>  | <u>2.27</u> | 3967.00        | 7.41         | 2.28         | 0.65          |
| <u>2646.00</u> | <u>16.82</u> | <u>12.07</u> | <u>4.01</u> | <u>3616.00</u> | <u>13.25</u> | <u>8.12</u>  | <u>2.33</u> y |
| 2778.00        | 9.79         | 5.04         | 1.68        | 4492.00        | 8.42         | 3.29         | 0.94          |
| 3149.00        | 7.65         | 2.90         | 0.97        | 3934.00        | 4.68         | 0.45         | -0.13         |
| 1865.00        | 3.06         | 1.69         | -0.56       | 1900.00        | 2.26         | 2.87         | -0.82         |
| 2339.00        | 3.12         | 1.63         | -0.54       | 3040.00        | 2.07         | 3.06         | -0.88         |
| 2768.00        | 5.71         | 0.96         | 0.32        | 2412.00        | 1.87         | 3.26         | -0.94         |
| 2512.00        | 3.11         | 1.64         | -0.55       | 2901.00        | 1.72         | 3.41         | -0.98         |
| 1568.00        | 4.66         | 0.09         | -0.03       | 1977.00        | 1.42         | 3.71         | -1.07         |
| 1589.00        | 4.09         | 0.66         | -0.22       | 3063.00        | 1.60         | 3.53         | -1.01         |
| 3829.00        | 4.86         | 0.11         | 0.04        | 4577.00        | 2.69         | 2.44         | -0.70         |
| 2841.00        | 8.83         | 4.08         | 1.36        | 4486.00        | 6.80         | 1.67         | 0.48          |
| 2502.00        | 5.88         | 1.13         | 0.37        | 3521.00        | 1.11         | 4.02         | -1.16         |
| 2812.00        | 6.83         | 2.08         | 0.69        | 4564.00        | 5.63         | 0.50         | 0.14          |
| 2918.00        | 3.26         | 1.49         | -0.50       | 4375.00        | 2.42         | 2.71         | -0.78         |
| 2414.00        | 5.59         | 0.84         | 0.28        | 3264.00        | 1.16         | 3.97         | -1.14         |
| 4562.00        | 3.99         | 0.76         | -0.25       | 2612.00        | 0.84         | 4.29         | -1.23         |
| 2819.00        | 7.34         | 2.59         | 0.86        | 2790.00        | 2.65         | 2.48         | -0.71         |

|                |              |             |              |                |              |              |               |
|----------------|--------------|-------------|--------------|----------------|--------------|--------------|---------------|
| 1730.00        | 9.08         | 4.33        | 1.44         | 1959.00        | 4.59         | 0.54         | -0.15         |
| 1967.00        | 4.42         | 0.33        | -0.11        | 2703.00        | 7.55         | 2.42         | 0.69          |
| 2276.00        | 5.27         | 0.52        | 0.17         | 3540.00        | 7.71         | 2.58         | 0.74          |
| 2497.00        | 7.49         | 2.74        | 0.91         | 3317.00        | 4.37         | 0.76         | -0.22         |
| 2528.00        | 5.58         | 0.83        | 0.28         | 4629.00        | 6.96         | 1.83         | 0.52          |
| 1872.00        | 1.71         | 3.04        | -1.01        | 2925.00        | 3.86         | 1.27         | -0.36         |
| 1395.00        | 9.96         | 5.21        | 1.73         | 3347.00        | 6.81         | 1.68         | 0.48          |
| 950.00         | 1.58         | 3.17        | -1.05        | 1475.00        | 0.75         | 4.38         | -1.26         |
| 1354.00        | 1.92         | 2.83        | -0.94        | 1564.00        | 7.10         | 1.97         | 0.56          |
| 1834.00        | 5.13         | 0.38        | 0.12         | 2303.00        | 2.82         | 2.31         | -0.66         |
| 1765.00        | 2.55         | 2.20        | -0.73        | 1700.00        | 3.35         | 1.78         | -0.51         |
| <u>2266.00</u> | <u>11.47</u> | <u>6.72</u> | <u>2.24</u>  | <u>2645.00</u> | <u>13.04</u> | <u>7.91</u>  | <u>2.27</u> y |
| 3514.00        | 3.76         | 0.99        | -0.33        | 4091.00        | 5.18         | 0.05         | 0.01          |
| 1842.00        | 4.78         | 0.03        | 0.01         | 2154.00        | 10.68        | 5.55         | 1.59          |
| 3881.00        | 6.39         | 1.64        | 0.55         | 3976.00        | 11.47        | 6.34         | 1.82          |
| <u>3934.00</u> | <u>13.32</u> | <u>8.57</u> | <u>2.85</u>  | <u>3811.00</u> | <u>13.93</u> | <u>8.80</u>  | <u>2.53</u> y |
| 2426.00        | 1.57         | 3.18        | -1.06        | 2805.00        | 4.63         | 0.50         | -0.14         |
| 904.00         | 4.98         | 0.23        | 0.08         | 1936.00        | 7.08         | 1.95         | 0.56          |
| 2705.00        | 4.21         | 0.54        | -0.18        | 1690.00        | 3.02         | 2.11         | -0.61         |
| 2550.00        | 2.78         | 1.97        | -0.65        | 1625.00        | 8.06         | 2.93         | 0.84          |
| <u>1382.00</u> | <u>3.91</u>  | <u>0.84</u> | <u>-0.28</u> | <u>2153.00</u> | <u>18.39</u> | <u>13.26</u> | <u>3.81</u> y |
| 2038.00        | 6.33         | 1.58        | 0.53         | 2282.00        | 19.02        | <u>13.89</u> | <u>3.99</u>   |
| 777.00         | 3.22         | 1.53        | -0.51        | 2193.00        | 8.48         | 3.35         | 0.96          |
| 1608.00        | 5.78         | 1.03        | 0.34         | 2121.00        | 8.77         | 3.64         | 1.04          |
| 1876.00        | 4.37         | 0.38        | -0.13        | 3089.00        | 10.75        | 5.62         | 1.61          |
| 1969.00        | 5.18         | 0.43        | 0.14         | 2488.00        | 9.89         | 4.76         | 1.37          |
| 1460.00        | 3.01         | 1.74        | -0.58        | 1776.00        | 4.90         | 0.23         | -0.07         |
| 772.00         | 2.98         | 1.77        | -0.59        | 1132.00        | 12.37        | <u>7.24</u>  | <u>2.08</u>   |
| 512.00         | 1.56         | 3.19        | -1.06        | 1028.00        | 8.95         | 3.82         | 1.10          |
| 1082.00        | 3.33         | 1.42        | -0.47        | 1946.00        | 10.23        | 5.10         | 1.46          |
| 2166.00        | 7.39         | 2.64        | 0.88         | 2790.00        | 16.38        | <u>11.25</u> | <u>3.23</u>   |
| 1693.00        | 2.72         | 2.03        | -0.68        | 2132.00        | 8.86         | 3.73         | 1.07          |
| 2369.00        | 0.84         | 3.91        | -1.30        | 3111.00        | 10.29        | 5.16         | 1.48          |
| 2445.00        | 3.03         | 1.72        | -0.57        | 2885.00        | 6.07         | 0.94         | 0.27          |
| 2204.00        | 2.13         | 2.62        | -0.87        | 4293.00        | 7.24         | 2.11         | 0.61          |
| 1327.00        | 6.18         | 1.43        | 0.48         | 1782.00        | 5.84         | 0.71         | 0.20          |
| 1228.00        | 5.13         | 0.38        | 0.13         | 2614.00        | 5.55         | 0.42         | 0.12          |
| <u>1939.00</u> | <u>9.59</u>  | <u>4.84</u> | <u>1.61</u>  | <u>2599.00</u> | <u>12.62</u> | <u>7.49</u>  | <u>2.15</u> y |
| 2058.00        | 0.97         | 3.78        | -1.26        | 2550.00        | 1.73         | 3.40         | -0.98         |
| 2783.00        | 4.75         | 2.03        |              | 2597.00        | 5.13         | 2.35         |               |
|                |              | 6.09        |              |                |              | 7.06         |               |
|                |              | 3.01        |              |                |              | 3.48         |               |
| 3098.00        | 27.44        | 3987.00     | 45.72        |                |              |              |               |
|                |              | 5723.00     | 55.22        |                |              |              |               |
| 3442.00        | 20.95        |             |              |                |              |              |               |
| 2847.00        | 20.55        |             |              |                |              |              |               |

|         |       |
|---------|-------|
| 3129.00 | 22.98 |
| 298.71  | 3.87  |
| 1834.00 | 4.69  |
| 1299.00 | 1.23  |
| 1396.00 | 2.36  |
| 2122.00 | 1.79  |
| 1662.75 | 2.52  |
| 384.58  | 1.52  |
|         | 11.60 |
|         | 4.56  |
|         | 16.16 |
|         | 20.46 |
|         | 0.79  |
|         | 0.21  |

| Plate    | Well | Gene                             | GeneID            | Cell Count | % inf | Abs Dev |
|----------|------|----------------------------------|-------------------|------------|-------|---------|
| 50021.00 | A02  | M-032274- dihydrofolate reduct   | 1720.00 DHFRP1    | 3369.00    | 5.52  | 1.13    |
| 50021.00 | A04  | M-012090- DiGeorge syndrome      | 8214.00 DGCR6     | 2970.00    | 5.05  | 1.60    |
| 50021.00 | A05  | M-011122- complement compo       | 721.00 C4B        | 4091.00    | 4.82  | 1.83    |
| 50021.00 | A06  | M-011844- deafness, autosomal    | 1687.00 DFNA5     | 2551.00    | 9.68  | 3.03    |
| 50021.00 | A07  | M-011003- complement compo       | 729.00 C6         | 3675.00    | 3.51  | 3.14    |
| 50021.00 | A08  | M-005847- transmembrane prot     | 28983.00 TMPRSS11 | 2031.00    | 7.48  | 0.83    |
| 50021.00 | A09  | M-019499- CD1b molecule          | 910.00 CD1B       | 1845.00    | 1.25  | 5.40    |
| 50021.00 | A10  | M-011638- desmin                 | 1674.00 DES       | 2206.00    | 3.40  | 3.25    |
| 50021.00 | A11  | M-019500- CD1c molecule          | 911.00 CD1C       | 2013.00    | 1.29  | 5.36    |
| 50021.00 | A12  | M-017992- chromosome 17 ope      | 23587.00 C17orf81 | 901.00     | 2.22  | 4.43    |
| 50021.00 | A13  | M-020689- CD24 molecule          | 934.00 CD24       | 1264.00    | 2.61  | 4.04    |
| 50021.00 | A14  | M-004289- alkB, alkylation repai | 221120.00 ALKBH3  | 2653.00    | 9.91  | 3.26    |
| 50021.00 | A15  | M-020827- CD244 molecule, nat    | 51744.00 CD244    | 2461.00    | 4.35  | 2.30    |
| 50021.00 | A16  | M-019970- secretion regulating   | 26297.00 SERGEF   | 3385.00    | 11.34 | 4.69    |
| 50021.00 | A17  | M-012799- CD2-associated prot    | 23607.00 CD2AP    | 2392.00    | 8.40  | 1.75    |
| 50021.00 | A18  | M-013400- deleted in esophage    | 50514.00 DEC1     | 3406.00    | 9.19  | 2.54    |
| 50021.00 | A19  | M-020057- CD2 (cytoplasmic tai   | 10421.00 CD2BP2   | 2517.00    | 3.58  | 3.07    |
| 50021.00 | A20  | M-012417- integrator complex s   | 26512.00 INTS6    | 2460.00    | 5.81  | 0.84    |
| 50021.00 | A21  | M-011604- CD37 molecule          | 951.00 CD37       | 1584.00    | 12.31 | 5.66    |
| 50021.00 | A23  | M-011117- CD53 molecule          | 963.00 CD53       | 2061.00    | 9.90  | 3.25    |
| 50021.00 | B02  | M-016308- Fc fragment of IgG, li | 2214.00 FCGR3A    | 1511.00    | 9.27  | 2.62    |
| 50021.00 | B04  | M-008725- fructose-1,6-bisphos   | 2203.00 FBP1      | 2229.00    | 2.87  | 3.78    |
| 50021.00 | B05  | M-004447- diablo homolog (Dro    | 56616.00 DIABLO   | 3801.00    | 4.08  | 2.57    |
| 50021.00 | B06  | M-017621- fibulin 5              | 10516.00 FBLN5    | 3497.00    | 2.55  | 4.11    |
| 50021.00 | B07  | M-012029- diaphanous homolog     | 1730.00 DIAPH2    | 4490.00    | 6.44  | 0.21    |
| 50021.00 | B08  | M-020818- zinc finger and BTB d  | 51341.00 ZBTB7A   | 3470.00    | 5.27  | 1.38    |
| 50021.00 | B09  | M-018997- diaphanous homolog     | 81624.00 DIAPH3   | 3609.00    | 7.45  | 0.80    |
| 50021.00 | B10  | M-011854- phenylalanyl-tRNA sy   | 2193.00 FARSA     | 2724.00    | 2.24  | 4.41    |
| 50021.00 | B11  | M-021454- disrupted in renal ca  | 84925.00 DIRC2    | 3082.00    | 7.75  | 1.10    |
| 50021.00 | B12  | M-009237- FERM, RhoGEF and p     | 9855.00 FARP2     | 1253.00    | 1.52  | 5.13    |
| 50021.00 | B13  | M-020321- disrupted in schizop   | 27185.00 DISC1    | 3116.00    | 6.64  | 0.01    |
| 50021.00 | B14  | M-014206- Fanconi anemia, cor    | 2188.00 FANCF     | 3451.00    | 8.46  | 1.81    |
| 50021.00 | B15  | M-004907- serine hydrolase-like  | 253190.00 SERHL2  | 3490.00    | 1.52  | 5.13    |
| 50021.00 | B16  | M-013991- Fanconi anemia, cor    | 2178.00 FANCE     | 3396.00    | 3.59  | 3.06    |
| 50021.00 | B17  | M-013639- dyskeratosis congeni   | 1736.00 DKC1      | 5038.00    | 13.30 | 6.65    |
| 50021.00 | B18  | M-016376- Fanconi anemia, cor    | 2177.00 FANCD2    | 4853.00    | 22.71 | 16.06   |
| 50021.00 | B19  | M-013972- integrator complex s   | 25896.00 INTS7    | 2656.00    | 1.81  | 4.84    |
| 50021.00 | B20  | M-011033- Fanconi anemia, cor    | 2176.00 FANCC     | 3140.00    | 13.03 | 6.38    |
| 50021.00 | B21  | M-009833- Src homology 3 dom     | 26084.00 SGEF     | 4130.00    | 12.83 | 6.18    |
| 50021.00 | B23  | M-022848- fumarylacetoacetate    | 151313.00 FAHD2B  | 2876.00    | 4.66  | 1.99    |
| 50021.00 | C02  | M-012890- damage-specific DN     | 1642.00 DDB1      | 3295.00    | 3.31  | 3.34    |
| 50021.00 | C04  | M-013592- proline/serine-rich c  | 84722.00 PSRC1    | 2748.00    | 2.91  | 3.74    |
| 50021.00 | C05  | M-004537- CD59 molecule, com     | 966.00 CD59       | 3687.00    | 13.53 | 6.88    |
| 50021.00 | C06  | M-016592- ubiquitin domain cor   | 92181.00 UBTD2    | 2062.00    | 3.78  | 2.87    |
| 50021.00 | C07  | M-017256- CD63 molecule          | 967.00 CD63       | 3760.00    | 9.87  | 3.22    |
| 50021.00 | C08  | M-015395- dynactin 4 (p62)       | 51164.00 DCTN4    | 4355.00    | 4.41  | 2.24    |

|              |                                  |           |           |         |       |      |
|--------------|----------------------------------|-----------|-----------|---------|-------|------|
| 50021.00 C09 | M-011236- CD68 molecule          | 968.00    | CD68      | 3059.00 | 3.60  | 3.05 |
| 50021.00 C10 | M-012218- dynactin 2 (p50)       | 10540.00  | DCTN2     | 3417.00 | 7.23  | 0.58 |
| 50021.00 C11 | M-012680- CD83 molecule          | 9308.00   | CD83      | 2778.00 | 3.64  | 3.01 |
| 50021.00 C12 | M-021491- decorin                | 1634.00   | DCN       | 2732.00 | 8.57  | 1.92 |
| 50021.00 C13 | M-012623- CD84 molecule          | 8832.00   | CD84      | 2423.00 | 3.84  | 2.81 |
| 50021.00 C14 | M-004269- DNA cross-link repair  | 64421.00  | DCLRE1C   | 3307.00 | 9.74  | 3.09 |
| 50021.00 C15 | M-016245- CD99 molecule          | 4267.00   | CD99      | 3213.00 | 4.79  | 1.86 |
| 50021.00 C16 | M-015780- DNA cross-link repair  | 64858.00  | DCLRE1B   | 3269.00 | 3.70  | 2.95 |
| 50021.00 C17 | M-015478- congenital dyserythr   | 146059.00 | CDAN1     | 1618.00 | 2.23  | 4.43 |
| 50021.00 C18 | M-020330- chromosome 16 ope      | 56942.00  | C16orf61  | 2411.00 | 8.50  | 1.85 |
| 50021.00 C19 | M-003223- cell division cycle 16 | 8881.00   | CDC16     | 1632.00 | 3.92  | 2.73 |
| 50021.00 C20 | M-020985- DAZ associated prote   | 9802.00   | DAZAP2    | 3465.00 | 8.28  | 1.63 |
| 50021.00 C21 | M-003225- cell division cycle 20 | 991.00    | CDC20     | 1755.00 | 2.51  | 4.14 |
| 50021.00 C23 | M-017290- cell division cycle 26 | 246184.00 | CDC26     | 2540.00 | 2.91  | 3.74 |
| 50021.00 D02 | M-019283- Fanconi anemia, con    | 2175.00   | FANCA     | 2558.00 | 0.63  | 6.02 |
| 50021.00 D04 | M-020999- Fas apoptotic inhibit  | 55179.00  | FAIM      | 4056.00 | 1.31  | 5.34 |
| 50021.00 D05 | M-017959- taxilin alpha          | 200081.00 | TXLNA     | 2249.00 | 0.62  | 6.03 |
| 50021.00 D06 | M-009106- Fas (TNFRSF6) associ   | 11124.00  | FAF1      | 2875.00 | 2.37  | 4.28 |
| 50021.00 D07 | M-031723- hypothetical protein   | 84242.00  | DKFZp547I | 4043.00 | 4.70  | 1.95 |
| 50021.00 D08 | M-008853- fatty acid binding pro | 2167.00   | FABP4     | 3118.00 | 1.19  | 5.46 |
| 50021.00 D09 | M-018592- haloacid dehalogena    | 84064.00  | HDHD2     | 3570.00 | 2.80  | 3.85 |
| 50021.00 D10 | M-010022- fatty acid binding pro | 2170.00   | FABP3     | 2369.00 | 1.01  | 5.64 |
| 50021.00 D11 | M-028371- hypothetical LOC258    | 25845.00  | LOC25845  | 2396.00 | 2.42  | 4.23 |
| 50021.00 D12 | M-008419- fatty acid binding pro | 2169.00   | FABP2     | 2223.00 | 3.87  | 2.78 |
| 50021.00 D13 | M-020258- transmembrane prot     | 26022.00  | TMEM98    | 3228.00 | 5.27  | 1.38 |
| 50021.00 D14 | M-007896- coagulation factor XI  | 2165.00   | F13B      | 2709.00 | 3.14  | 3.51 |
| 50021.00 D15 | M-012723- SMAD family membe      | 4086.00   | SMAD1     | 2565.00 | 2.85  | 3.80 |
| 50021.00 D16 | M-010070- coagulation factor XI  | 2162.00   | F13A1     | 5709.00 | 3.92  | 2.73 |
| 50021.00 D17 | M-027346- KIAA1217               | 56243.00  | KIAA1217  | 4218.00 | 2.99  | 3.66 |
| 50021.00 D18 | M-005053- F11 receptor           | 50848.00  | F11R      | 2990.00 | 4.55  | 2.10 |
| 50021.00 D19 | M-006039- spastic paraplegia 7   | 6687.00   | SPG7      | 2876.00 | 3.58  | 3.07 |
| 50021.00 D20 | M-004218- enhancer of zeste hc   | 2146.00   | EZH2      | 2989.00 | 2.28  | 4.38 |
| 50021.00 D21 | M-028612- chromosome 6 open      | 79747.00  | C6orf103  | 3882.00 | 3.12  | 3.53 |
| 50021.00 D23 | M-012257- chromosome 6 open      | 10591.00  | C6orf108  | 3010.00 | 2.72  | 3.93 |
| 50021.00 E02 | M-021042- deleted in azosperr    | 57054.00  | DAZ3      | 3524.00 | 5.02  | 1.63 |
| 50021.00 E04 | M-021073- deleted in azosperr    | 57055.00  | DAZ2      | 3950.00 | 8.41  | 1.76 |
| 50021.00 E05 | M-003229- cell division cycle 27 | 996.00    | CDC27     | 3728.00 | 9.04  | 2.39 |
| 50021.00 E06 | M-015509- LIM domain only 3 (r   | 55885.00  | LMO3      | 4779.00 | 7.78  | 1.13 |
| 50021.00 E07 | M-005057- cell division cycle 42 | 998.00    | CDC42     | 4724.00 | 7.77  | 1.12 |
| 50021.00 E08 | M-004415- death-associated pro   | 1611.00   | DAP       | 5214.00 | 15.40 | 8.75 |
| 50021.00 E09 | M-017551- CDC42 effector prote   | 11135.00  | CDC42EP1  | 4470.00 | 7.58  | 0.93 |
| 50021.00 E10 | M-004573- CD55 molecule, deca    | 1604.00   | CD55      | 4392.00 | 8.74  | 2.09 |
| 50021.00 E11 | M-003232- CDC45 cell division c  | 8318.00   | CDC45L    | 3484.00 | 7.09  | 0.44 |
| 50021.00 E12 | M-004414- defender against cell  | 1603.00   | DAD1      | 2856.00 | 4.24  | 2.41 |
| 50021.00 E13 | M-017428- phosphatidylinositol   | 128869.00 | PIGU      | 3788.00 | 8.18  | 1.53 |
| 50021.00 E14 | M-016440- dapper, antagonist o   | 51339.00  | DACT1     | 3594.00 | 10.99 | 4.34 |
| 50021.00 E15 | M-005289- NUF2, NDC80 kineto     | 83540.00  | NUF2      | 1376.00 | 10.47 | 3.82 |



|          |            |                                       |                |              |                |              |              |
|----------|------------|---------------------------------------|----------------|--------------|----------------|--------------|--------------|
| 50021.00 | E16        | M-008522- disabled homolog 2,         | 1601.00        | DAB2         | 2712.00        | 5.64         | 1.01         |
| 50021.00 | E17        | M-010495- cell division cycle ass     | 55038.00       | CDCA4        | 3062.00        | 6.86         | 0.21         |
| 50021.00 | <b>E18</b> | <b>M-008943- disabled homolog 1 (</b> | <b>1600.00</b> | <b>DAB1</b>  | <b>5194.00</b> | <b>17.87</b> | <b>11.22</b> |
| 50021.00 | E19        | M-017348- cell division cycle ass     | 83879.00       | CDCA7        | 4289.00        | 6.02         | 0.63         |
| 50021.00 | E20        | M-012925- dishevelled associate       | 23002.00       | DAAM1        | 5334.00        | 9.90         | 3.25         |
| 50021.00 | E21        | M-003823- cadherin 3, type 1, P       | 1001.00        | CDH3         | 3925.00        | 5.76         | 0.89         |
| 50021.00 | E23        | M-011007- cyclin-dependent kin        | 1029.00        | CDKN2A       | 3973.00        | 2.79         | 3.86         |
| 50021.00 | F02        | M-004217- enhancer of zeste ho        | 2145.00        | EZH1         | 3806.00        | 11.98        | 5.33         |
| 50021.00 | F04        | M-017233- eyes absent homolog         | 2139.00        | EYA2         | 3421.00        | 2.37         | 4.28         |
| 50021.00 | F05        | M-018550- prenyl (decaprenyl) c       | 57107.00       | PDSS2        | 4753.00        | 7.15         | 0.50         |
| 50021.00 | F06        | M-010512- ecotropic viral integr      | 2124.00        | EVI2B        | 4634.00        | 7.62         | 0.97         |
| 50021.00 | F07        | M-007821- complement compo            | 730.00         | C7           | 1933.00        | 3.47         | 3.18         |
| 50021.00 | F08        | M-018389- transmembrane char          | 147138.00      | TMC8         | 2861.00        | 6.54         | 0.11         |
| 50021.00 | F09        | M-016140- limb region 1 homolo        | 64327.00       | LMBR1        | 2970.00        | 1.38         | 5.27         |
| 50021.00 | F10        | M-016167- transmembrane char          | 11322.00       | TMC6         | 4174.00        | 4.65         | 2.00         |
| 50021.00 | F11        | M-028907- sterile alpha motif d       | 219285.00      | SAMD9L       | 4622.00        | 10.17        | 3.52         |
| 50021.00 | F12        | M-018291- Ellis van Creveld syn       | 132884.00      | EVC2         | 2433.00        | 1.15         | 5.50         |
| 50021.00 | <b>F13</b> | <b>M-011119- complement compo</b>     | <b>731.00</b>  | <b>C8A</b>   | <b>2607.00</b> | <b>12.28</b> | <b>5.63</b>  |
| 50021.00 | F14        | M-013594- Ellis van Creveld syn       | 2121.00        | EVC          | 3718.00        | 3.82         | 2.83         |
| 50021.00 | F15        | M-011004- complement compo            | 732.00         | C8B          | 3273.00        | 10.24        | 3.59         |
| 50021.00 | F16        | M-008894- ets variant gene 5 (e       | 2119.00        | ETV5         | 3114.00        | 3.50         | 3.15         |
| 50021.00 | F17        | M-017853- complement compo            | 735.00         | C9           | 2344.00        | 12.63        | 5.98         |
| 50021.00 | F18        | M-003801- ets variant gene 1          | 2115.00        | ETV1         | 2819.00        | 3.51         | 3.14         |
| 50021.00 | F19        | M-010173- carbonic anhydrase I        | 759.00         | CA1          | 4853.00        | 4.66         | 1.99         |
| 50021.00 | F20        | M-015367- intraflagellar transpc      | 55081.00       | IFT57        | 3712.00        | 10.72        | 4.07         |
| 50021.00 | F21        | M-009639- carbonic anhydrase I        | 760.00         | CA2          | 3194.00        | 3.01         | 3.64         |
| 50021.00 | F23        | M-004939- chaperone, ABC1 act         | 56997.00       | CABC1        | 2368.00        | 3.25         | 3.40         |
| 50021.00 | G02        | M-008330- cytochrome P450, fa         | 1544.00        | CYP1A2       | 4071.00        | 7.05         | 0.40         |
| 50021.00 | G04        | M-008329- cytochrome P450, fa         | 1583.00        | CYP11A1      | 3849.00        | 11.95        | 5.30         |
| 50021.00 | G05        | M-020888- Cdon homolog (mou           | 50937.00       | CDON         | 2331.00        | 6.18         | 0.47         |
| 50021.00 | G06        | M-013511- CAP-GLY domain con          | 7461.00        | CLIP2        | 3780.00        | 4.87         | 1.78         |
| 50021.00 | G07        | M-019791- cerebellar degenerat        | 1038.00        | CDR1         | 3981.00        | 5.17         | 1.48         |
| 50021.00 | G08        | M-017355- cytochrome c, soma          | 54205.00       | CYCS         | 2698.00        | 2.97         | 3.68         |
| 50021.00 | G09        | M-022509- cerebellar degenerat        | 1039.00        | CDR2         | 2049.00        | 1.71         | 4.94         |
| 50021.00 | G10        | M-011021- cytochrome b-245, b         | 1536.00        | CYBB         | 2468.00        | 11.59        | 4.94         |
| 50021.00 | G11        | M-011238- corneodesmosin              | 1041.00        | CDSN         | 3967.00        | 13.59        | 6.94         |
| 50021.00 | G12        | M-019621- cytochrome b5 type          | 1528.00        | CYB5A        | 2107.00        | 5.32         | 1.33         |
| 50021.00 | G13        | M-007853- angiopoietin-like 7         | 10218.00       | ANGPTL7      | 1677.00        | 7.39         | 0.74         |
| 50021.00 | G14        | M-007879- chemokine (C-X-C m          | 6374.00        | CXCL5        | 3076.00        | 19.67        | <b>13.02</b> |
| 50021.00 | G15        | M-019693- carcinoembryonic ar         | 1087.00        | CEACAM7      | 2837.00        | 13.36        | 6.71         |
| 50021.00 | G16        | M-019553- cullin 5                    | 8065.00        | CUL5         | 3696.00        | 11.58        | 4.93         |
| 50021.00 | G17        | M-009515- CCAAT/enhancer bin          | 1053.00        | CEBPE        | 2473.00        | 3.52         | 3.13         |
| 50021.00 | G18        | M-016631- V-set and immunogl          | 23584.00       | VSIG2        | 4083.00        | 9.48         | 2.83         |
| 50021.00 | G19        | M-019449- cerebral endothelial        | 51148.00       | CEECAM1      | 3755.00        | 6.82         | 0.17         |
| 50021.00 | G20        | M-005840- cathepsin K                 | 1513.00        | CTSK         | 3661.00        | 7.65         | 1.00         |
| 50021.00 | G21        | M-008871- carboxyl ester lipase       | 1056.00        | CEL          | 3246.00        | 5.55         | 1.10         |
| 50021.00 | <b>G23</b> | <b>M-003253- centromere protein I</b> | <b>1063.00</b> | <b>CENPF</b> | <b>5116.00</b> | <b>18.88</b> | <b>12.23</b> |

|          |     |                                  |           |          |         |       |       |
|----------|-----|----------------------------------|-----------|----------|---------|-------|-------|
| 50021.00 | H02 | M-020493- ERO1-like (S. cerevisi | 30001.00  | ERO1L    | 3660.00 | 9.04  | 2.39  |
| 50021.00 | H04 | M-004878- endoplasmic reticulu   | 10595.00  | ERN2     | 6674.00 | 18.46 | 11.81 |
| 50021.00 | H05 | M-006122- calcium channel, voli  | 774.00    | CACNA1B  | 4833.00 | 28.72 | 22.07 |
| 50021.00 | H06 | M-012670- enhancer of rudimer    | 2079.00   | ERH      | 2885.00 | 9.43  | 2.78  |
| 50021.00 | H07 | M-006127- calcium channel, voli  | 8913.00   | CACNA1G  | 2308.00 | 7.80  | 1.15  |
| 50021.00 | H08 | M-019946- excision repair cross- | 2072.00   | ERCC4    | 2806.00 | 12.22 | 5.57  |
| 50021.00 | H09 | M-006130- calcium channel, voli  | 779.00    | CACNA1S  | 2558.00 | 7.78  | 1.13  |
| 50021.00 | H10 | M-011028- excision repair cross- | 2071.00   | ERCC3    | 2336.00 | 8.35  | 1.70  |
| 50021.00 | H11 | M-009062- calcium channel, voli  | 785.00    | CACNB4   | 3691.00 | 9.89  | 3.24  |
| 50021.00 | H12 | M-017905- epidermal growth fa    | 2059.00   | EPS8     | 2948.00 | 3.12  | 3.53  |
| 50021.00 | H13 | M-011989- calbindin 1, 28kDa     | 793.00    | CALB1    | 2815.00 | 3.62  | 3.03  |
| 50021.00 | H14 | M-008245- glutamyl-prolyl-tRNA   | 2058.00   | EPRS     | 3231.00 | 6.10  | 0.55  |
| 50021.00 | H15 | M-010410- dopamine receptor I    | 50632.00  | DRD1IP   | 3472.00 | 6.16  | 0.49  |
| 50021.00 | H16 | M-005866- protease, serine, 33   | 260429.00 | PRSS33   | 3328.00 | 6.49  | 0.16  |
| 50021.00 | H17 | M-019790- cathelicidin antimicro | 820.00    | CAMP     | 3665.00 | 1.53  | 5.12  |
| 50021.00 | H18 | M-003809- ectonucleotide pyro    | 5167.00   | ENPP1    | 4441.00 | 3.02  | 3.63  |
| 50021.00 | H19 | M-019047- calmodulin binding t   | 23125.00  | CAMTA2   | 3176.00 | 1.54  | 5.11  |
| 50021.00 | H20 | M-009718- enolase 3 (beta, mus   | 2027.00   | ENO3     | 3063.00 | 9.73  | 3.08  |
| 50021.00 | H21 | M-012210- CAP, adenylate cycla   | 10487.00  | CAP1     | 4737.00 | 4.05  | 2.60  |
| 50021.00 | H23 | M-012213- capping protein (acti  | 830.00    | CAPZA2   | 4279.00 | 4.72  | 1.93  |
| 50021.00 | I02 | M-017535- catenin, beta like 1   | 56259.00  | CTNNBL1  | 3132.00 | 0.86  | 5.79  |
| 50021.00 | I04 | M-012620- catenin (cadherin-as   | 8727.00   | CTNNAL1  | 5526.00 | 26.71 | 20.06 |
| 50021.00 | I05 | M-003254- centromere protein I   | 64946.00  | CENPH    | 2825.00 | 3.72  | 2.93  |
| 50021.00 | I06 | M-010505- catenin (cadherin-as   | 1495.00   | CTNNA1   | 3264.00 | 4.78  | 1.87  |
| 50021.00 | I07 | M-010209- centromere protein .   | 55835.00  | CENPJ    | 1992.00 | 4.07  | 2.58  |
| 50021.00 | I08 | M-016267- cytotoxic T-lymphoc    | 1493.00   | CTLA4    | 3523.00 | 6.19  | 0.46  |
| 50021.00 | I09 | M-006841- centrosomal protein    | 11064.00  | CEP110   | 3001.00 | 3.33  | 3.32  |
| 50021.00 | I10 | M-017236- cystatin F (leukocyst  | 8530.00   | CST7     | 4004.00 | 8.92  | 2.27  |
| 50021.00 | I11 | M-008938- carboxylesterase 2 (i  | 8824.00   | CES2     | 2568.00 | 2.80  | 3.85  |
| 50021.00 | I12 | M-009598- cystatin C (amyloid a  | 1471.00   | CST3     | 2387.00 | 5.15  | 1.50  |
| 50021.00 | I13 | M-015133- hypothetical gene CC   | 90634.00  | CG018    | 3106.00 | 7.37  | 0.72  |
| 50021.00 | I14 | M-011424- cysteine and glycine-  | 8048.00   | CSRP3    | 2286.00 | 4.68  | 1.97  |
| 50021.00 | I15 | M-011164- chorionic gonadotro    | 1082.00   | CGB      | 3518.00 | 1.05  | 5.60  |
| 50021.00 | I16 | M-011839- cysteine and glycine-  | 1465.00   | CSRP1    | 4438.00 | 7.08  | 0.43  |
| 50021.00 | I17 | M-013674- chorionic gonadotro    | 93659.00  | CGB5     | 3872.00 | 1.24  | 5.41  |
| 50021.00 | I18 | M-011243- chorionic somatoma     | 1442.00   | CSH1     | 2278.00 | 1.32  | 5.33  |
| 50021.00 | I19 | M-013699- chorionic gonadotro    | 94115.00  | CGB8     | 2884.00 | 1.73  | 4.92  |
| 50021.00 | I20 | M-017208- chondrosarcoma ass     | 158511.00 | CSAG1    | 2368.00 | 5.79  | 0.86  |
| 50021.00 | I21 | M-008529- chromodomain helic     | 1105.00   | CHD1     | 5060.00 | 16.52 | 9.87  |
| 50021.00 | I23 | M-031153- chromodomain helic     | 80205.00  | CHD9     | 4368.00 | 7.69  | 1.04  |
| 50021.00 | J02 | M-009777- enolase 2 (gamma, n    | 2026.00   | ENO2     | 5020.00 | 17.49 | 10.84 |
| 50021.00 | J04 | M-010508- cortactin              | 2017.00   | CTTN     | 4708.00 | 18.18 | 11.53 |
| 50021.00 | J05 | M-011990- capping protein (acti  | 832.00    | CAPZB    | 3346.00 | 8.34  | 1.69  |
| 50021.00 | J06 | M-011025- emerin (Emery-Dreif    | 2010.00   | EMD      | 3065.00 | 4.86  | 1.79  |
| 50021.00 | J07 | M-019890- CART prepropeptide     | 9607.00   | CARTPT   | 3765.00 | 9.35  | 2.70  |
| 50021.00 | J08 | M-016006- ELAV (embryonic letl   | 1996.00   | ELAVL4   | 2715.00 | 10.76 | 4.11  |
| 50021.00 | J09 | M-012413- CASP8 associated pro   | 9994.00   | CASP8AP2 | 807.00  | 7.56  | 0.91  |

|          |     |                                  |           |          |         |       |       |
|----------|-----|----------------------------------|-----------|----------|---------|-------|-------|
| 50021.00 | J10 | M-019534- eukaryotic translatio  | 8661.00   | EIF3S10  | 1156.00 | 5.80  | 0.85  |
| 50021.00 | J11 | M-013008- ELKS/RAB6-interactir   | 26059.00  | ERC2     | 4006.00 | 17.30 | 10.65 |
| 50021.00 | J12 | M-020180- eukaryotic translatio  | 1967.00   | EIF2B1   | 3989.00 | 25.72 | 19.07 |
| 50021.00 | J13 | M-006131- cation channel, sper   | 117144.00 | CATSPER1 | 3788.00 | 10.48 | 3.83  |
| 50021.00 | J14 | M-009822- enoyl-Coenzyme A, f    | 1962.00   | EHHADH   | 4154.00 | 5.22  | 1.43  |
| 50021.00 | J15 | M-010958- caveolin 2             | 858.00    | CAV2     | 2501.00 | 14.35 | 7.70  |
| 50021.00 | J16 | M-007245- eukaryotic translatio  | 1938.00   | EEF2     | 4278.00 | 9.21  | 2.56  |
| 50021.00 | J17 | M-011229- caveolin 3             | 859.00    | CAV3     | 2737.00 | 3.98  | 2.67  |
| 50021.00 | J18 | M-017199- eukaryotic translatio  | 1915.00   | EEF1A1   | 2673.00 | 3.67  | 2.98  |
| 50021.00 | J19 | M-019985- CCAAT/enhancer bin     | 10153.00  | CEBPZ    | 2961.00 | 19.59 | 12.94 |
| 50021.00 | J20 | M-011259- extracellular matrix p | 1842.00   | ECM2     | 5779.00 | 28.62 | 21.97 |
| 50021.00 | J21 | M-011825- cerebellin 1 precursc  | 869.00    | CBLN1    | 5040.00 | 19.44 | 12.79 |
| 50021.00 | J23 | M-004513- carbonyl reductase 1   | 873.00    | CBR1     | 3962.00 | 6.97  | 0.32  |
| 50021.00 | K02 | M-013585- cripto, FRL-1, cryptic | 55997.00  | CFC1     | 3163.00 | 6.42  | 0.23  |
| 50021.00 | K04 | M-012876- crystallin, gamma S    | 1427.00   | CRYGS    | 4082.00 | 10.83 | 4.18  |
| 50021.00 | K05 | M-019067- cysteine-rich hydrop   | 26511.00  | CHIC2    | 4744.00 | 10.12 | 3.47  |
| 50021.00 | K06 | M-012336- crystallin, gamma D    | 1421.00   | CRYGD    | 3969.00 | 12.88 | 6.23  |
| 50021.00 | K07 | M-006133- CHRNA7 (cholinergic    | 89832.00  | CHRFAM7A | 3835.00 | 12.15 | 5.50  |
| 50021.00 | K08 | M-013470- crystallin, gamma A    | 1418.00   | CRYGA    | 4317.00 | 17.49 | 10.84 |
| 50021.00 | K09 | M-006145- cholinergic receptor,  | 1143.00   | CHRNB4   | 3317.00 | 3.95  | 2.70  |
| 50021.00 | K10 | M-011019- crystallin, beta B2    | 1415.00   | CRYBB2   | 3592.00 | 23.89 | 17.24 |
| 50021.00 | K11 | M-006148- cholinergic receptor,  | 1146.00   | CHRNG    | 3715.00 | 12.60 | 5.95  |
| 50021.00 | K12 | M-011629- crystallin, beta B1    | 1414.00   | CRYBB1   | 2497.00 | 2.12  | 4.53  |
| 50021.00 | K13 | M-010926- lysosomal trafficking  | 1130.00   | LYST     | 3882.00 | 8.19  | 1.54  |
| 50021.00 | K14 | M-011628- crystallin, beta A4    | 1413.00   | CRYBA4   | 3267.00 | 1.96  | 4.69  |
| 50021.00 | K15 | M-019857- cytosolic iron-sulfur  | 9391.00   | CIAO1    | 4340.00 | 2.72  | 3.93  |
| 50021.00 | K16 | M-021059- cytotoxic and regulat  | 56253.00  | CRTAM    | 3474.00 | 5.04  | 1.61  |
| 50021.00 | K17 | M-017367- NLR family, pyrin do   | 114548.00 | NLRP3    | 3924.00 | 4.28  | 2.37  |
| 50021.00 | K18 | M-011949- cofactor required for  | 9442.00   | CRSP8    | 3672.00 | 4.93  | 1.72  |
| 50021.00 | K19 | M-015423- radical S-adenosyl m   | 91543.00  | RSAD2    | 3054.00 | 3.83  | 2.82  |
| 50021.00 | K20 | M-013220- cofactor required for  | 9439.00   | CRSP3    | 4963.00 | 3.26  | 3.39  |
| 50021.00 | K21 | M-015011- cirrhosis, autosomal   | 84916.00  | CIRH1A   | 3645.00 | 1.07  | 5.58  |
| 50021.00 | K23 | M-017381- cytokine inducible St  | 1154.00   | CISH     | 3906.00 | 1.25  | 5.40  |
| 50021.00 | L02 | M-012093- Epstein-Barr virus inc | 10148.00  | EBI3     | 2147.00 | 2.38  | 4.27  |
| 50021.00 | L04 | M-006313- ELL associated factor  | 55840.00  | EAF2     | 4554.00 | 9.46  | 2.81  |
| 50021.00 | L05 | M-008597- carbonyl reductase 3   | 874.00    | CBR3     | 3697.00 | 8.57  | 1.92  |
| 50021.00 | L06 | M-003264- E2F transcription fac  | 1876.00   | E2F6     | 3911.00 | 7.11  | 0.46  |
| 50021.00 | L07 | M-009716- chromobox homolog      | 10951.00  | CBX1     | 2384.00 | 3.65  | 3.00  |
| 50021.00 | L08 | M-003263- E2F transcription fac  | 1875.00   | E2F5     | 3525.00 | 18.61 | 11.96 |
| 50021.00 | L09 | M-003825- KRIT1, ankyrin repea   | 889.00    | KRIT1    | 3206.00 | 6.58  | 0.07  |
| 50021.00 | L10 | M-003262- E2F transcription fac  | 1874.00   | E2F4     | 2582.00 | 3.25  | 3.40  |
| 50021.00 | L11 | M-003204- cyclin A1              | 8900.00   | CCNA1    | 3576.00 | 11.77 | 5.12  |
| 50021.00 | L12 | M-003261- E2F transcription fac  | 1871.00   | E2F3     | 1805.00 | 6.15  | 0.50  |
| 50021.00 | L13 | M-003205- cyclin A2              | 890.00    | CCNA2    | 1511.00 | 7.88  | 1.23  |
| 50021.00 | L14 | M-003260- E2F transcription fac  | 1870.00   | E2F2     | 4091.00 | 10.07 | 3.42  |
| 50021.00 | L15 | M-003206- cyclin B1              | 891.00    | CCNB1    | 1795.00 | 8.97  | 2.32  |
| 50021.00 | L16 | M-009707- ubiquitin-conjugatin   | 27338.00  | UBE2S    | 4884.00 | 21.11 | 14.46 |

|          |            |                                        |                 |               |                |              |              |
|----------|------------|----------------------------------------|-----------------|---------------|----------------|--------------|--------------|
| 50021.00 | L17        | M-003207- cyclin B2                    | 9133.00         | CCNB2         | 2164.00        | 3.65         | 3.00         |
| 50021.00 | L18        | M-003652- dysferlin, limb girdle       | 8291.00         | DYSF          | 2867.00        | 5.34         | 1.31         |
| 50021.00 | L19        | M-003208- cyclin B3                    | 85417.00        | CCNB3         | 3310.00        | 3.57         | 3.09         |
| 50021.00 | L20        | M-017455- dystrobrevin binding         | 84062.00        | DTNBP1        | 3778.00        | 10.77        | 4.12         |
| 50021.00 | L21        | M-003209- cyclin C                     | 892.00          | CCNC          | 3541.00        | 6.21         | 0.44         |
| 50021.00 | L23        | M-003210- cyclin D1                    | 595.00          | CCND1         | 1504.00        | 2.39         | 4.26         |
| 50021.00 | M02        | M-020109- chromosome 1 open            | 10485.00        | C1orf61       | 1868.00        | 3.32         | 3.33         |
| 50021.00 | <b>M04</b> | <b>M-017786- cytokine receptor-lik</b> | <b>51379.00</b> | <b>CRLF3</b>  | <b>2179.00</b> | <b>34.70</b> | <b>28.05</b> |
| 50021.00 | <b>M05</b> | <b>M-023462- cytoplasmic linker as</b> | <b>23122.00</b> | <b>CLASP2</b> | <b>4437.00</b> | <b>28.94</b> | <b>22.29</b> |
| 50021.00 | M06        | M-007863- cytokine receptor-lik        | 9244.00         | CRLF1         | 3612.00        | 13.48        | 6.83         |
| 50021.00 | M07        | M-006157- chloride channel Kb          | 1188.00         | CLCNKB        | 4353.00        | 21.14        | <b>14.49</b> |
| 50021.00 | M08        | M-017495- cysteine-rich secreto        | 167.00          | CRISP1        | 3704.00        | 10.37        | 3.72         |
| 50021.00 | M09        | M-021368- C-type lectin domain         | 51267.00        | CLEC1A        | 2219.00        | 8.65         | 2.00         |
| 50021.00 | M10        | M-013998- cell cycle progressior       | 9236.00         | CCPG1         | 2410.00        | 6.02         | 0.63         |
| 50021.00 | M11        | M-023690- pleckstrin homology          | 64857.00        | PLEKHG2       | 3226.00        | 11.47        | 4.82         |
| 50021.00 | M12        | M-010558- transforming growth          | 9238.00         | TBRG4         | 2668.00        | 9.48         | 2.83         |
| 50021.00 | M13        | M-011805- chloride intracellular       | 9022.00         | CLIC3         | 2655.00        | 3.65         | 3.00         |
| 50021.00 | M14        | M-015972- coproporphyrinogen           | 1371.00         | CPOX          | 3175.00        | 11.18        | 4.53         |
| 50021.00 | M15        | M-013944- CAP-GLY domain con           | 25999.00        | CLIP3         | 2658.00        | 11.78        | 5.13         |
| 50021.00 | M16        | M-013155- copine V                     | 57699.00        | CPNE5         | 3990.00        | 17.64        | <b>10.99</b> |
| 50021.00 | M17        | M-019282- ceroid-lipofuscinosis        | 1201.00         | CLN3          | 3698.00        | 13.66        | 7.01         |
| 50021.00 | M18        | M-023553- carboxypeptidase N,          | 1370.00         | CPN2          | 4385.00        | 12.91        | 6.26         |
| 50021.00 | M19        | M-020163- ceroid-lipofuscinosis        | 1203.00         | CLN5          | 4082.00        | 22.17        | <b>15.52</b> |
| 50021.00 | M20        | M-012088- COX17 cytochrome c           | 10063.00        | COX17         | 3496.00        | 10.70        | 4.05         |
| 50021.00 | M21        | M-020875- ceroid-lipofuscinosis        | 54982.00        | CLN6          | 5001.00        | 11.02        | 4.37         |
| 50021.00 | <b>M23</b> | <b>M-013304- ceroid-lipofuscinosis</b> | <b>2055.00</b>  | <b>CLN8</b>   | <b>4923.00</b> | <b>17.55</b> | <b>10.90</b> |
| 50021.00 | N02        | M-021367- dystrobrevin, beta           | 1838.00         | DTNB          | 2946.00        | 3.39         | 3.26         |
| 50021.00 | N04        | M-012303- destrin (actin depoly        | 11034.00        | DSTN          | 4730.00        | 11.08        | 4.43         |
| 50021.00 | N05        | M-003211- cyclin D2                    | 894.00          | CCND2         | 3542.00        | 13.69        | 7.04         |
| 50021.00 | N06        | M-012493- dentin sialophospho          | 1834.00         | DSPP          | 2742.00        | 12.00        | 5.35         |
| 50021.00 | N07        | M-003212- cyclin D3                    | 896.00          | CCND3         | 3263.00        | 16.89        | <b>10.24</b> |
| 50021.00 | <b>N08</b> | <b>M-004268- Down syndrome criti</b>   | <b>1827.00</b>  | <b>DSCR1</b>  | <b>2688.00</b> | <b>21.65</b> | <b>15.00</b> |
| 50021.00 | N09        | M-012418- cyclin D-type binding        | 23582.00        | CCNDBP1       | 2385.00        | 12.50        | 5.85         |
| 50021.00 | N10        | M-020215- UTP20, small subunit         | 27340.00        | UTP20         | 2960.00        | 16.15        | 9.50         |
| 50021.00 | N11        | M-003213- cyclin E1                    | 898.00          | CCNE1         | 1795.00        | 9.14         | 2.49         |
| 50021.00 | N12        | M-016718- developmentally reg          | 129831.00       | DRB1          | 2600.00        | 12.50        | 5.85         |
| 50021.00 | N13        | M-003214- cyclin E2                    | 9134.00         | CCNE2         | 3401.00        | 12.20        | 5.55         |
| 50021.00 | N14        | M-008974- DR1-associated prot          | 10589.00        | DRAP1         | 2502.00        | 8.27         | 1.62         |
| 50021.00 | <b>N15</b> | <b>M-003215- cyclin F</b>              | <b>899.00</b>   | <b>CCNF</b>   | <b>3251.00</b> | <b>26.36</b> | <b>19.71</b> |
| 50021.00 | N16        | M-012695- dedicator of cytokine        | 1795.00         | DOCK3         | 3366.00        | 7.07         | 0.42         |
| 50021.00 | N17        | M-003216- cyclin G1                    | 900.00          | CCNG1         | 3735.00        | 9.72         | 3.07         |
| 50021.00 | N18        | M-015792- CDK2-associated pro          | 10263.00        | CDK2AP2       | 2890.00        | 7.37         | 0.72         |
| 50021.00 | N19        | M-003217- cyclin G2                    | 901.00          | CCNG2         | 4435.00        | 14.48        | 7.83         |
| 50021.00 | N20        | M-019458- filamin A interacting        | 11259.00        | FILIP1L       | 3722.00        | 6.66         | 0.01         |
| 50021.00 | N21        | M-003218- cyclin H                     | 902.00          | CCNH          | 3264.00        | 14.58        | 7.93         |
| 50021.00 | <b>N23</b> | <b>M-003219- cyclin I</b>              | <b>10983.00</b> | <b>CCNI</b>   | <b>3870.00</b> | <b>10.00</b> | <b>3.35</b>  |
| 50021.00 | O02        | M-005814- COP9 constitutive ph         | 10987.00        | COPS5         | 2296.00        | 4.01         | 2.64         |

|              |                                   |           |           |         |       |       |
|--------------|-----------------------------------|-----------|-----------|---------|-------|-------|
| 50021.00 O04 | M-011494- COP9 constitutive pr    | 8533.00   | COPS3     | 2182.00 | 3.53  | 3.12  |
| 50021.00 O05 | M-010594- cleft lip and palate a: | 1209.00   | CLPTM1    | 3869.00 | 10.24 | 3.59  |
| 50021.00 O06 | M-013197- collagen-like tail sub  | 8292.00   | COLQ      | 3276.00 | 6.56  | 0.09  |
| 50021.00 O07 | M-020393- calyntenin 1            | 22883.00  | CLSTN1    | 2076.00 | 5.92  | 0.73  |
| 50021.00 O08 | M-013006- collagen, type VIII, al | 1295.00   | COL8A1    | 2802.00 | 11.92 | 5.27  |
| 50021.00 O09 | M-019513- clusterin               | 1191.00   | CLU       | 2276.00 | 24.96 | 18.31 |
| 50021.00 O10 | M-013073- collagen, type II, alpl | 1280.00   | COL2A1    | 3931.00 | 19.59 | 12.94 |
| 50021.00 O11 | M-006158- cyclic nucleotide gat   | 1259.00   | CNGA1     | 2663.00 | 13.78 | 7.13  |
| 50021.00 O12 | M-011615- collagen, type XV, al   | 1306.00   | COL15A1   | 2259.00 | 6.20  | 0.45  |
| 50021.00 O13 | M-006161- cyclic nucleotide gat   | 54714.00  | CNGB3     | 4015.00 | 24.09 | 17.44 |
| 50021.00 O14 | M-011845- coagulation factor C    | 1690.00   | COCH      | 2948.00 | 18.08 | 11.43 |
| 50021.00 O15 | M-020830- cyclin M1               | 26507.00  | CNNM1     | 1706.00 | 5.63  | 1.02  |
| 50021.00 O16 | M-032257- hypothetical LOC200     | 200025.00 | LOC200025 | 3037.00 | 13.17 | 6.52  |
| 50021.00 O17 | M-017176- cyclin M2               | 54805.00  | CNNM2     | 3230.00 | 4.40  | 2.25  |
| 50021.00 O18 | M-009725- contactin associated    | 8506.00   | CNTNAP1   | 3842.00 | 12.65 | 6.00  |
| 50021.00 O19 | M-019438- cyclin M3               | 26505.00  | CNNM3     | 4390.00 | 7.49  | 0.84  |
| 50021.00 O20 | M-012529- contactin 6             | 27255.00  | CNTN6     | 3170.00 | 9.37  | 2.72  |
| 50021.00 O21 | M-016411- CCR4-NOT transcript     | 246175.00 | CNOT6L    | 3456.00 | 7.81  | 1.16  |
| 50021.00 O23 | M-007858- contactin 5             | 53942.00  | CNTN5     | 1500.00 | 10.87 | 4.22  |
| 50021.00 P02 | M-015171- deoxynucleotidyltrar    | 116092.00 | DNTTIP1   | 2461.00 | 6.54  | 0.11  |
| 50021.00 P04 | M-019392- DnaJ (Hsp40) homok      | 55466.00  | DNAJA4    | 2873.00 | 3.79  | 2.86  |
| 50021.00 P05 | M-029590- cyclin K                | 8812.00   | CCNK      | 1584.00 | 2.27  | 4.38  |
| 50021.00 P06 | M-012104- DnaJ (Hsp40) homok      | 10294.00  | DNAJA2    | 1791.00 | 3.41  | 3.24  |
| 50021.00 P07 | M-008682- cyclin L1               | 57018.00  | CCNL1     | 1819.00 | 9.24  | 2.59  |
| 50021.00 P08 | M-016792- DnaJ (Hsp40) homok      | 85406.00  | DNAJC14   | 3452.00 | 5.50  | 1.15  |
| 50021.00 P09 | M-003220- cyclin T1               | 904.00    | CCNT1     | 2625.00 | 9.49  | 2.84  |
| 50021.00 P10 | M-023757- dystrophia myotonic     | 1762.00   | DMWD      | 2349.00 | 4.73  | 1.92  |
| 50021.00 P11 | M-003221- cyclin T2               | 905.00    | CCNT2     | 1781.00 | 6.40  | 0.25  |
| 50021.00 P12 | M-008862- discs, large (Drosoph   | 9229.00   | DLGAP1    | 928.00  | 2.05  | 4.60  |
| 50021.00 P13 | M-020147- chaperonin containir    | 10575.00  | CCT4      | 1626.00 | 3.01  | 3.64  |
| 50021.00 P14 | M-016846- discs, large homolog    | 9787.00   | DLG7      | 2465.00 | 11.60 | 4.95  |
| 50021.00 P15 | M-020161- chaperonin containir    | 10693.00  | CCT6B     | 2171.00 | 11.75 | 5.10  |
| 50021.00 P16 | M-020066- deleted in lymphocy     | 8847.00   | DLEU2     | 3093.00 | 4.72  | 1.93  |
| 50021.00 P17 | M-016196- CD164 molecule, sial    | 8763.00   | CD164     | 2010.00 | 4.88  | 1.77  |
| 50021.00 P18 | M-011983- deleted in lung and e   | 9940.00   | DLEC1     | 2059.00 | 5.63  | 1.02  |
| 50021.00 P19 | M-012629- CD1a molecule           | 909.00    | CD1A      | 2780.00 | 17.16 | 10.51 |
| 50021.00 P20 | M-015443- hypothetical protein    | 55355.00  | DKFZp762E | 1914.00 | 6.11  | 0.54  |
| 50021.00 P21 | M-013613- chorionic gonadotro     | 114335.00 | CGB1      | 1452.00 | 1.65  | 5.00  |
| 50021.00 P23 | M-013614- chorionic gonadotro     | 114336.00 | CGB2      | 2762.00 | 2.10  | 4.55  |
|              |                                   |           | mdn       | 3209.50 | 6.65  | 3.25  |
|              |                                   |           | 3MAD      |         |       | 9.74  |
|              |                                   |           | MADc      |         |       | 4.80  |
|              | %hits                             | 4.38      |           |         |       |       |
| 50021.00 C22 |                                   |           |           | 3270.00 | 24.10 |       |
| 50021.00 D22 |                                   |           |           | 4484.00 | 26.47 |       |
| 50021.00 E22 |                                   |           |           | 4643.00 | 39.87 |       |
| 50021.00 F22 |                                   |           |           | 3705.00 | 32.42 |       |

50021.00 G22  
50021.00 H22  
50021.00 I22  
50021.00 J22

|           |         |       |
|-----------|---------|-------|
| mn        | 4025.50 | 30.71 |
| sd        | 649.37  | 7.03  |
|           | 1603.00 | 4.99  |
|           | 1578.00 | 1.65  |
|           | 1552.00 | 0.90  |
|           | 1838.00 | 8.65  |
| mn        | 1642.75 | 4.05  |
| sd        | 131.82  | 3.55  |
| 3psSD     |         | 21.10 |
| 3ngSD     |         | 10.64 |
| SumSD     |         | 31.74 |
| DiffMn    |         | 26.67 |
| SmovrDiff |         | 1.19  |
| 1minus    |         | -0.19 |



| rZ    | Cell Coun | % inf | Abs Dev | rZ    | Cell Count | % inf | Abs Dev | rZ     |
|-------|-----------|-------|---------|-------|------------|-------|---------|--------|
| -0.24 | 2595.00   | 3.58  | 0.63    | -0.20 | 1639.00    | 4.51  | 1.84    | 1.01   |
| -0.33 | 2575.00   | 3.84  | 0.37    | -0.11 | 2126.00    | 6.35  | 3.68    | 2.02   |
| -0.38 | 2227.00   | 2.47  | 1.74    | -0.55 | 1958.00    | 1.99  | 0.68    | -0.38  |
| 0.63  | 2654.00   | 8.14  | 3.93    | 1.23  | 1909.00    | 4.35  | 1.68    | 0.92   |
| -0.65 | 2110.00   | 3.60  | 0.61    | -0.19 | 3147.00    | 2.70  | 0.03    | 0.02   |
| 0.17  | 1926.00   | 6.33  | 2.12    | 0.67  | 2462.00    | 3.82  | 1.15    | 0.63   |
| -1.13 | 989.00    | 1.82  | 2.39    | -0.75 | 1642.00    | 2.80  | 0.13    | 0.07   |
| -0.68 | 2051.00   | 6.68  | 2.47    | 0.77  | 1182.00    | 1.95  | 0.72    | -0.40  |
| -1.12 | 1411.00   | 5.24  | 1.03    | 0.32  | 1758.00    | 2.10  | 0.57    | -0.31  |
| -0.92 | 940.00    | 3.19  | 1.02    | -0.32 | 612.00     | 3.27  | 0.60    | 0.33   |
| -0.84 | 661.00    | 2.12  | 2.09    | -0.66 | 477.00     | 3.56  | 0.89    | 0.49   |
| 0.68  | 1841.00   | 12.93 | 8.72    | 2.73  | 2609.00    | 10.73 | 8.06    | 4.44 y |
| -0.48 | 1772.00   | 1.19  | 3.02    | -0.95 | 1595.00    | 1.94  | 0.73    | -0.40  |
| 0.98  | 2749.00   | 9.49  | 5.28    | 1.66  | 2160.00    | 4.91  | 2.24    | 1.23   |
| 0.36  | 912.00    | 5.37  | 1.16    | 0.36  | 1154.00    | 4.59  | 1.92    | 1.06   |
| 0.53  | 1398.00   | 5.72  | 1.51    | 0.47  | 2332.00    | 2.44  | 0.23    | -0.13  |
| -0.64 | 1555.00   | 2.96  | 1.25    | -0.39 | 1936.00    | 3.51  | 0.84    | 0.46   |
| -0.17 | 2047.00   | 2.64  | 1.57    | -0.49 | 2086.00    | 1.49  | 1.18    | -0.65  |
| 1.18  | 1277.00   | 1.80  | 2.41    | -0.76 | 2284.00    | 3.06  | 0.39    | 0.22   |
| 0.68  | 1763.00   | 5.28  | 1.07    | 0.33  | 1696.00    | 7.19  | 4.52    | 2.49   |
| 0.54  | 2217.00   | 6.63  | 2.42    | 0.76  | 1413.00    | 1.98  | 0.69    | -0.38  |
| -0.79 | 1941.00   | 1.24  | 2.97    | -0.93 | 1763.00    | 0.34  | 2.33    | -1.28  |
| -0.54 | 3501.00   | 3.14  | 1.07    | -0.33 | 2009.00    | 1.05  | 1.62    | -0.90  |
| -0.86 | 2388.00   | 0.54  | 3.67    | -1.15 | 2899.00    | 1.45  | 1.22    | -0.67  |
| -0.05 | 2571.00   | 2.29  | 1.92    | -0.60 | 3499.00    | 1.26  | 1.41    | -0.78  |
| -0.29 | 1464.00   | 5.40  | 1.19    | 0.37  | 476.00     | 3.36  | 0.69    | 0.38   |
| 0.17  | 2143.00   | 6.44  | 2.23    | 0.70  | 3329.00    | 2.37  | 0.30    | -0.17  |
| -0.92 | 1590.00   | 1.51  | 2.70    | -0.85 | 1783.00    | 1.23  | 1.44    | -0.79  |
| 0.23  | 1848.00   | 11.31 | 7.10    | 2.22  | 3026.00    | 6.81  | 4.14    | 2.28 y |
| -1.07 | 1011.00   | 0.20  | 4.01    | -1.26 | 945.00     | 3.81  | 1.14    | 0.63   |
| 0.00  | 2687.00   | 1.64  | 2.57    | -0.81 | 2251.00    | 0.67  | 2.00    | -1.11  |
| 0.38  | 2981.00   | 4.93  | 0.72    | 0.23  | 1940.00    | 2.47  | 0.20    | -0.11  |
| -1.07 | 1862.00   | 0.81  | 3.40    | -1.07 | 2100.00    | 1.86  | 0.81    | -0.45  |
| -0.64 | 1752.00   | 0.91  | 3.30    | -1.03 | 1197.00    | 6.35  | 3.68    | 2.02   |
| 1.38  | 2657.00   | 4.06  | 0.15    | -0.05 | 4046.00    | 4.30  | 1.63    | 0.90   |
| 3.34  | 2405.00   | 11.10 | 6.89    | 2.16  | 3551.00    | 13.74 | 11.07   | 6.10 y |
| -1.01 | 2900.00   | 1.24  | 2.97    | -0.93 | 2231.00    | 2.11  | 0.56    | -0.31  |
| 1.33  | 2051.00   | 3.36  | 0.85    | -0.27 | 1892.00    | 4.18  | 1.51    | 0.83   |
| 1.29  | 3027.00   | 2.08  | 2.13    | -0.67 | 2729.00    | 4.29  | 1.62    | 0.89   |
| -0.42 | 2314.00   | 7.35  | 3.14    | 0.98  | 2828.00    | 3.25  | 0.58    | 0.32   |
| -0.70 | 3934.00   | 2.59  | 1.62    | -0.51 | 3468.00    | 0.63  | 2.04    | -1.12  |
| -0.78 | 1969.00   | 0.61  | 3.60    | -1.13 | 1840.00    | 1.03  | 1.64    | -0.90  |
| 1.43  | 3214.00   | 6.35  | 2.14    | 0.67  | 3814.00    | 4.27  | 1.60    | 0.88   |
| -0.60 | 1772.00   | 3.39  | 0.82    | -0.26 | 1848.00    | 0.60  | 2.07    | -1.14  |
| 0.67  | 2523.00   | 6.18  | 1.97    | 0.62  | 3185.00    | 2.35  | 0.32    | -0.18  |
| -0.47 | 2869.00   | 2.02  | 2.19    | -0.69 | 3719.00    | 0.94  | 1.73    | -0.95  |

|       |         |      |      |       |         |      |      |       |
|-------|---------|------|------|-------|---------|------|------|-------|
| -0.64 | 1828.00 | 1.04 | 3.17 | -0.99 | 2783.00 | 0.32 | 2.35 | -1.29 |
| 0.12  | 1910.00 | 3.19 | 1.02 | -0.32 | 2305.00 | 0.43 | 2.24 | -1.23 |
| -0.63 | 1299.00 | 3.08 | 1.13 | -0.35 | 1292.00 | 0.77 | 1.90 | -1.05 |
| 0.40  | 1788.00 | 5.20 | 0.99 | 0.31  | 1321.00 | 1.51 | 1.16 | -0.64 |
| -0.59 | 2167.00 | 3.37 | 0.84 | -0.26 | 1771.00 | 1.30 | 1.37 | -0.76 |
| 0.64  | 2293.00 | 7.98 | 3.77 | 1.18  | 3390.00 | 2.27 | 0.40 | -0.22 |
| -0.39 | 1955.00 | 4.04 | 0.17 | -0.05 | 2118.00 | 0.99 | 1.68 | -0.93 |
| -0.61 | 1583.00 | 2.02 | 2.19 | -0.69 | 1893.00 | 1.16 | 1.51 | -0.83 |
| -0.92 | 1628.00 | 3.26 | 0.95 | -0.30 | 1812.00 | 0.33 | 2.34 | -1.29 |
| 0.38  | 1401.00 | 6.21 | 2.00 | 0.63  | 2872.00 | 5.71 | 3.04 | 1.67  |
| -0.57 | 1115.00 | 3.68 | 0.53 | -0.17 | 1769.00 | 1.30 | 1.37 | -0.76 |
| 0.34  | 2490.00 | 6.14 | 1.93 | 0.61  | 3098.00 | 5.36 | 2.69 | 1.48  |
| -0.86 | 1110.00 | 3.78 | 0.43 | -0.13 | 1627.00 | 1.41 | 1.26 | -0.69 |
| -0.78 | 2649.00 | 6.12 | 1.91 | 0.60  | 2023.00 | 1.73 | 0.94 | -0.52 |
| -1.25 | 3416.00 | 1.55 | 2.66 | -0.83 | 3817.00 | 1.28 | 1.39 | -0.77 |
| -1.11 | 4985.00 | 2.79 | 1.42 | -0.45 | 3776.00 | 0.93 | 1.74 | -0.96 |
| -1.26 | 2455.00 | 1.34 | 2.87 | -0.90 | 2791.00 | 0.43 | 2.24 | -1.24 |
| -0.89 | 2661.00 | 1.62 | 2.59 | -0.81 | 1818.00 | 0.55 | 2.12 | -1.17 |
| -0.41 | 2489.00 | 4.22 | 0.01 | 0.00  | 2577.00 | 2.10 | 0.57 | -0.32 |
| -1.14 | 1587.00 | 0.38 | 3.83 | -1.20 | 2607.00 | 3.26 | 0.59 | 0.32  |
| -0.80 | 2699.00 | 4.89 | 0.68 | 0.21  | 2899.00 | 2.90 | 0.23 | 0.12  |
| -1.17 | 1982.00 | 0.15 | 4.06 | -1.27 | 1616.00 | 0.31 | 2.36 | -1.30 |
| -0.88 | 2279.00 | 3.64 | 0.57 | -0.18 | 1966.00 | 2.44 | 0.23 | -0.13 |
| -0.58 | 2815.00 | 2.06 | 2.15 | -0.67 | 2631.00 | 2.51 | 0.16 | -0.09 |
| -0.29 | 3096.00 | 3.00 | 1.21 | -0.38 | 2894.00 | 0.97 | 1.70 | -0.94 |
| -0.73 | 1901.00 | 1.63 | 2.58 | -0.81 | 1954.00 | 0.77 | 1.90 | -1.05 |
| -0.79 | 997.00  | 3.11 | 1.10 | -0.35 | 1647.00 | 1.15 | 1.52 | -0.84 |
| -0.57 | 3593.00 | 2.64 | 1.57 | -0.49 | 5438.00 | 2.19 | 0.48 | -0.27 |
| -0.76 | 3075.00 | 3.38 | 0.83 | -0.26 | 5604.00 | 4.46 | 1.79 | 0.98  |
| -0.44 | 1898.00 | 4.79 | 0.58 | 0.18  | 3171.00 | 3.50 | 0.83 | 0.46  |
| -0.64 | 2333.00 | 1.03 | 3.18 | -1.00 | 3436.00 | 3.58 | 0.91 | 0.50  |
| -0.91 | 2367.00 | 0.21 | 4.00 | -1.25 | 2948.00 | 2.31 | 0.36 | -0.20 |
| -0.74 | 2910.00 | 2.06 | 2.15 | -0.67 | 3524.00 | 1.33 | 1.34 | -0.74 |
| -0.82 | 2558.00 | 0.82 | 3.39 | -1.06 | 2050.00 | 3.95 | 1.28 | 0.70  |
| -0.34 | 3986.00 | 1.35 | 2.86 | -0.90 | 3165.00 | 0.60 | 2.07 | -1.14 |
| 0.36  | 3173.00 | 2.74 | 1.47 | -0.46 | 3187.00 | 0.85 | 1.82 | -1.01 |
| 0.50  | 2703.00 | 7.14 | 2.93 | 0.92  | 3424.00 | 3.68 | 1.01 | 0.55  |
| 0.24  | 3271.00 | 0.92 | 3.29 | -1.03 | 5116.00 | 2.37 | 0.30 | -0.17 |
| 0.23  | 2704.00 | 1.70 | 2.51 | -0.79 | 3963.00 | 1.54 | 1.13 | -0.62 |
| 1.82  | 1783.00 | 3.14 | 1.07 | -0.34 | 3577.00 | 3.16 | 0.49 | 0.27  |
| 0.19  | 2837.00 | 2.26 | 1.95 | -0.61 | 4630.00 | 0.60 | 2.07 | -1.14 |
| 0.44  | 2662.00 | 1.01 | 3.20 | -1.00 | 3082.00 | 0.65 | 2.02 | -1.11 |
| 0.09  | 2371.00 | 2.36 | 1.85 | -0.58 | 2525.00 | 2.38 | 0.29 | -0.16 |
| -0.50 | 1837.00 | 0.76 | 3.45 | -1.08 | 2002.00 | 1.55 | 1.12 | -0.62 |
| 0.32  | 2129.00 | 1.97 | 2.24 | -0.70 | 3022.00 | 2.12 | 0.55 | -0.31 |
| 0.90  | 1982.00 | 6.41 | 2.20 | 0.69  | 2735.00 | 3.58 | 0.91 | 0.50  |
| 0.79  | 494.00  | 1.01 | 3.20 | -1.00 | 1100.00 | 1.18 | 1.49 | -0.82 |



|       |         |       |       |       |         |       |       |        |
|-------|---------|-------|-------|-------|---------|-------|-------|--------|
| -0.21 | 1625.00 | 1.05  | 3.16  | -0.99 | 2181.00 | 0.50  | 2.17  | -1.19  |
| 0.04  | 2290.00 | 3.71  | 0.50  | -0.16 | 3014.00 | 1.33  | 1.34  | -0.74  |
| 2.33  | 3564.00 | 11.11 | 6.90  | 2.16  | 4054.00 | 3.63  | 0.96  | 0.52 y |
| -0.13 | 2943.00 | 2.11  | 2.10  | -0.66 | 4376.00 | 1.94  | 0.73  | -0.40  |
| 0.68  | 3958.00 | 3.41  | 0.80  | -0.25 | 4057.00 | 1.60  | 1.07  | -0.59  |
| -0.19 | 1940.00 | 2.42  | 1.79  | -0.56 | 2488.00 | 0.72  | 1.95  | -1.07  |
| -0.80 | 3270.00 | 1.62  | 2.59  | -0.81 | 2610.00 | 1.07  | 1.60  | -0.88  |
| 1.11  | 2424.00 | 3.42  | 0.79  | -0.25 | 4031.00 | 1.94  | 0.74  | -0.41  |
| -0.89 | 2964.00 | 2.73  | 1.48  | -0.46 | 2841.00 | 0.99  | 1.68  | -0.93  |
| 0.10  | 3956.00 | 2.63  | 1.58  | -0.50 | 4005.00 | 2.75  | 0.08  | 0.04   |
| 0.20  | 3303.00 | 1.60  | 2.61  | -0.82 | 3796.00 | 2.71  | 0.04  | 0.02   |
| -0.66 | 1101.00 | 0.36  | 3.85  | -1.21 | 1557.00 | 0.06  | 2.61  | -1.44  |
| -0.02 | 2266.00 | 3.05  | 1.17  | -0.37 | 2708.00 | 1.26  | 1.41  | -0.78  |
| -1.10 | 1894.00 | 0.69  | 3.52  | -1.10 | 2171.00 | 0.92  | 1.75  | -0.96  |
| -0.42 | 1476.00 | 1.15  | 3.06  | -0.96 | 2783.00 | 2.12  | 0.55  | -0.30  |
| 0.73  | 3681.00 | 6.25  | 2.04  | 0.64  | 3390.00 | 5.49  | 2.82  | 1.55   |
| -1.15 | 2153.00 | 0.65  | 3.56  | -1.12 | 2041.00 | 1.13  | 1.54  | -0.85  |
| 1.17  | 2243.00 | 13.60 | 9.39  | 2.94  | 1897.00 | 8.07  | 5.40  | 2.97 y |
| -0.59 | 2037.00 | 5.55  | 1.34  | 0.42  | 2735.00 | 3.84  | 1.17  | 0.64   |
| 0.75  | 2864.00 | 9.36  | 5.15  | 1.61  | 3565.00 | 10.01 | 7.34  | 4.04   |
| -0.66 | 1808.00 | 2.27  | 1.94  | -0.61 | 3011.00 | 0.93  | 1.74  | -0.96  |
| 1.24  | 1339.00 | 4.41  | 0.20  | 0.06  | 1838.00 | 5.06  | 2.39  | 1.31   |
| -0.65 | 2488.00 | 1.85  | 2.36  | -0.74 | 3369.00 | 2.73  | 0.06  | 0.03   |
| -0.42 | 3588.00 | 1.90  | 2.31  | -0.73 | 4392.00 | 2.73  | 0.06  | 0.03   |
| 0.85  | 2941.00 | 5.47  | 1.26  | 0.40  | 4686.00 | 15.83 | 13.16 | 7.25   |
| -0.76 | 1516.00 | 1.98  | 2.23  | -0.70 | 2858.00 | 4.69  | 2.02  | 1.11   |
| -0.71 | 2594.00 | 3.89  | 0.32  | -0.10 | 2077.00 | 4.19  | 1.52  | 0.83   |
| 0.08  | 3239.00 | 16.21 | 12.00 | 3.76  | 3424.00 | 0.70  | 1.97  | -1.09  |
| 1.10  | 3425.00 | 3.68  | 0.53  | -0.17 | 3270.00 | 1.44  | 1.23  | -0.68  |
| -0.10 | 1810.00 | 3.81  | 0.40  | -0.12 | 1642.00 | 3.05  | 0.38  | 0.20   |
| -0.37 | 2162.00 | 1.20  | 3.01  | -0.94 | 3257.00 | 2.95  | 0.28  | 0.15   |
| -0.31 | 2539.00 | 0.47  | 3.74  | -1.17 | 3456.00 | 0.75  | 1.92  | -1.06  |
| -0.77 | 1899.00 | 1.32  | 2.89  | -0.91 | 2065.00 | 1.11  | 1.56  | -0.86  |
| -1.03 | 982.00  | 1.22  | 2.99  | -0.94 | 1836.00 | 0.93  | 1.74  | -0.96  |
| 1.03  | 1158.00 | 3.97  | 0.24  | -0.07 | 1891.00 | 7.24  | 4.57  | 2.52   |
| 1.44  | 2304.00 | 5.03  | 0.82  | 0.26  | 2977.00 | 3.33  | 0.66  | 0.36   |
| -0.28 | 1744.00 | 1.89  | 2.32  | -0.73 | 1579.00 | 2.53  | 0.14  | -0.08  |
| 0.15  | 1777.00 | 5.01  | 0.80  | 0.25  | 2221.00 | 2.48  | 0.19  | -0.11  |
| 2.71  | 1694.00 | 7.44  | 3.23  | 1.01  | 2649.00 | 6.46  | 3.79  | 2.08 x |
| 1.40  | 2066.00 | 8.13  | 3.92  | 1.23  | 2928.00 | 5.26  | 2.59  | 1.42   |
| 1.03  | 2593.00 | 4.94  | 0.73  | 0.23  | 4188.00 | 4.75  | 2.08  | 1.14   |
| -0.65 | 1785.00 | 2.24  | 1.97  | -0.62 | 2358.00 | 2.71  | 0.04  | 0.02   |
| 0.59  | 2800.00 | 4.82  | 0.61  | 0.19  | 2747.00 | 4.91  | 2.24  | 1.23   |
| 0.03  | 2466.00 | 2.92  | 1.29  | -0.40 | 3525.00 | 2.35  | 0.32  | -0.18  |
| 0.21  | 2427.00 | 3.26  | 0.96  | -0.30 | 2714.00 | 2.28  | 0.39  | -0.21  |
| -0.23 | 2760.00 | 3.66  | 0.55  | -0.17 | 2914.00 | 2.30  | 0.37  | -0.21  |
| 2.55  | 3761.00 | 8.61  | 4.40  | 1.38  | 3328.00 | 7.69  | 5.02  | 2.76 y |

|       |         |       |       |       |         |       |       |        |
|-------|---------|-------|-------|-------|---------|-------|-------|--------|
| 0.50  | 2677.00 | 5.98  | 1.77  | 0.55  | 3014.00 | 1.53  | 1.14  | -0.63  |
| 2.46  | 4125.00 | 3.64  | 0.57  | -0.18 | 3752.00 | 2.91  | 0.24  | 0.13   |
| 4.59  | 3066.00 | 17.87 | 13.66 | 4.28  | 2942.00 | 9.31  | 6.64  | 3.66 y |
| 0.58  | 1198.00 | 3.34  | 0.87  | -0.27 | 1069.00 | 3.46  | 0.79  | 0.43   |
| 0.24  | 774.00  | 4.39  | 0.18  | 0.06  | 694.00  | 3.03  | 0.36  | 0.19   |
| 1.16  | 1667.00 | 8.04  | 3.83  | 1.20  | 1219.00 | 2.71  | 0.04  | 0.02   |
| 0.23  | 2106.00 | 14.34 | 10.13 | 3.17  | 2158.00 | 4.91  | 2.24  | 1.23   |
| 0.35  | 1929.00 | 8.76  | 4.55  | 1.43  | 3535.00 | 6.17  | 3.50  | 1.92   |
| 0.67  | 1778.00 | 3.04  | 1.17  | -0.37 | 1940.00 | 2.11  | 0.56  | -0.31  |
| -0.74 | 1763.00 | 1.53  | 2.68  | -0.84 | 1781.00 | 0.84  | 1.83  | -1.01  |
| -0.63 | 1787.00 | 7.11  | 2.90  | 0.91  | 2074.00 | 1.74  | 0.93  | -0.52  |
| -0.12 | 1693.00 | 6.02  | 1.81  | 0.57  | 1892.00 | 3.44  | 0.77  | 0.42   |
| -0.10 | 2663.00 | 8.37  | 4.16  | 1.30  | 2625.00 | 3.81  | 1.14  | 0.63   |
| -0.03 | 1536.00 | 10.16 | 5.95  | 1.86  | 2212.00 | 2.03  | 0.64  | -0.35  |
| -1.07 | 2167.00 | 5.49  | 1.28  | 0.40  | 2086.00 | 2.25  | 0.42  | -0.23  |
| -0.76 | 2401.00 | 2.46  | 1.75  | -0.55 | 2890.00 | 1.28  | 1.39  | -0.77  |
| -1.06 | 1924.00 | 3.01  | 1.20  | -0.37 | 2622.00 | 2.94  | 0.27  | 0.14   |
| 0.64  | 2186.00 | 5.35  | 1.14  | 0.36  | 2060.00 | 1.70  | 0.97  | -0.54  |
| -0.54 | 3119.00 | 8.72  | 4.51  | 1.41  | 3729.00 | 1.80  | 0.87  | -0.48  |
| -0.40 | 2004.00 | 11.53 | 7.32  | 2.29  | 2366.00 | 2.79  | 0.12  | 0.06   |
| -1.21 | 2335.00 | 0.43  | 3.78  | -1.19 | 2038.00 | 0.69  | 1.98  | -1.09  |
| 4.17  | 5068.00 | 16.58 | 12.37 | 3.87  | 5400.00 | 13.67 | 11.00 | 6.05 y |
| -0.61 | 1885.00 | 2.60  | 1.61  | -0.50 | 2742.00 | 2.41  | 0.26  | -0.15  |
| -0.39 | 2171.00 | 2.99  | 1.22  | -0.38 | 2601.00 | 3.23  | 0.56  | 0.31   |
| -0.54 | 974.00  | 1.85  | 2.36  | -0.74 | 1669.00 | 2.58  | 0.09  | -0.05  |
| -0.10 | 2377.00 | 1.68  | 2.53  | -0.79 | 2828.00 | 4.77  | 2.10  | 1.16   |
| -0.69 | 2304.00 | 3.04  | 1.17  | -0.37 | 3369.00 | 1.81  | 0.86  | -0.48  |
| 0.47  | 2143.00 | 2.89  | 1.32  | -0.41 | 2809.00 | 3.99  | 1.32  | 0.72   |
| -0.80 | 1601.00 | 2.31  | 1.90  | -0.60 | 1284.00 | 0.47  | 2.20  | -1.21  |
| -0.31 | 1972.00 | 3.50  | 0.71  | -0.22 | 1811.00 | 2.60  | 0.07  | -0.04  |
| 0.15  | 2375.00 | 14.27 | 10.06 | 3.15  | 3627.00 | 12.21 | 9.54  | 5.25 y |
| -0.41 | 2078.00 | 3.90  | 0.31  | -0.10 | 2339.00 | 9.06  | 6.39  | 3.52   |
| -1.17 | 2747.00 | 1.27  | 2.94  | -0.92 | 4041.00 | 1.41  | 1.26  | -0.70  |
| 0.09  | 3879.00 | 7.40  | 3.19  | 1.00  | 4845.00 | 7.00  | 4.33  | 2.38   |
| -1.13 | 2435.00 | 4.44  | 0.23  | 0.07  | 3919.00 | 2.09  | 0.58  | -0.32  |
| -1.11 | 2294.00 | 7.59  | 3.38  | 1.06  | 2027.00 | 2.81  | 0.14  | 0.08   |
| -1.02 | 2479.00 | 2.34  | 1.87  | -0.59 | 3658.00 | 1.34  | 1.33  | -0.73  |
| -0.18 | 2568.00 | 4.67  | 0.46  | 0.14  | 2682.00 | 6.38  | 3.71  | 2.04   |
| 2.05  | 3603.00 | 18.29 | 14.08 | 4.41  | 4917.00 | 20.77 | 18.10 | 9.96 y |
| 0.22  | 1963.00 | 6.72  | 2.51  | 0.79  | 2800.00 | 5.54  | 2.87  | 1.58   |
| 2.26  | 4560.00 | 18.40 | 14.19 | 4.45  | 3687.00 | 2.96  | 0.29  | 0.16 y |
| 2.40  | 4379.00 | 11.94 | 7.73  | 2.42  | 2878.00 | 3.93  | 1.26  | 0.69 y |
| 0.35  | 2866.00 | 2.90  | 1.31  | -0.41 | 2013.00 | 1.29  | 1.38  | -0.76  |
| -0.37 | 1847.00 | 1.35  | 2.86  | -0.90 | 2333.00 | 1.54  | 1.13  | -0.62  |
| 0.56  | 3534.00 | 4.05  | 0.16  | -0.05 | 2562.00 | 1.91  | 0.76  | -0.42  |
| 0.85  | 1391.00 | 2.08  | 2.13  | -0.67 | 1670.00 | 1.92  | 0.75  | -0.42  |
| 0.19  | 832.00  | 4.33  | 0.12  | 0.04  | 872.00  | 3.56  | 0.89  | 0.49   |

|       |         |       |       |       |         |       |      |        |
|-------|---------|-------|-------|-------|---------|-------|------|--------|
| -0.18 | 645.00  | 5.27  | 1.06  | 0.33  | 797.00  | 1.88  | 0.79 | -0.44  |
| 2.22  | 2961.00 | 7.70  | 3.49  | 1.09  | 3297.00 | 3.49  | 0.82 | 0.45   |
| 3.97  | 2661.00 | 18.79 | 14.58 | 4.57  | 2498.00 | 11.01 | 8.34 | 4.59 y |
| 0.80  | 3448.00 | 5.42  | 1.21  | 0.38  | 2688.00 | 3.13  | 0.46 | 0.25   |
| -0.30 | 2316.00 | 5.10  | 0.89  | 0.28  | 2782.00 | 1.33  | 1.34 | -0.74  |
| 1.60  | 1855.00 | 6.79  | 2.58  | 0.81  | 998.00  | 0.80  | 1.87 | -1.03  |
| 0.53  | 2902.00 | 4.69  | 0.48  | 0.15  | 2540.00 | 1.93  | 0.74 | -0.41  |
| -0.56 | 2151.00 | 3.11  | 1.10  | -0.34 | 1996.00 | 1.50  | 1.17 | -0.64  |
| -0.62 | 1313.00 | 1.83  | 2.38  | -0.75 | 1727.00 | 3.42  | 0.75 | 0.41   |
| 2.69  | 2287.00 | 13.56 | 9.35  | 2.93  | 2413.00 | 9.66  | 6.99 | 3.85 y |
| 4.57  | 4045.00 | 12.44 | 8.23  | 2.58  | 4225.00 | 10.08 | 7.41 | 4.08 y |
| 2.66  | 3464.00 | 3.98  | 0.23  | -0.07 | 3817.00 | 2.65  | 0.02 | -0.02  |
| 0.07  | 2731.00 | 1.35  | 2.86  | -0.90 | 2955.00 | 6.57  | 3.90 | 2.14   |
| -0.05 | 2820.00 | 3.48  | 0.73  | -0.23 | 3523.00 | 1.93  | 0.74 | -0.41  |
| 0.87  | 2679.00 | 5.08  | 0.87  | 0.27  | 3783.00 | 1.27  | 1.40 | -0.77  |
| 0.72  | 2815.00 | 1.46  | 2.75  | -0.86 | 2329.00 | 0.90  | 1.77 | -0.98  |
| 1.30  | 3065.00 | 5.64  | 1.43  | 0.45  | 2678.00 | 2.20  | 0.47 | -0.26  |
| 1.14  | 2378.00 | 5.64  | 1.43  | 0.45  | 2647.00 | 2.80  | 0.13 | 0.07   |
| 2.26  | 2325.00 | 3.91  | 0.30  | -0.09 | 2304.00 | 3.82  | 1.15 | 0.63   |
| -0.56 | 2275.00 | 4.88  | 0.67  | 0.21  | 3142.00 | 2.32  | 0.35 | -0.19  |
| 3.59  | 3150.00 | 18.89 | 14.68 | 4.60  | 3008.00 | 8.41  | 5.74 | 3.16 y |
| 1.24  | 2358.00 | 2.16  | 2.05  | -0.64 | 2731.00 | 2.27  | 0.40 | -0.22  |
| -0.94 | 1732.00 | 5.25  | 1.04  | 0.33  | 2164.00 | 2.17  | 0.50 | -0.28  |
| 0.32  | 2983.00 | 6.34  | 2.13  | 0.67  | 3076.00 | 2.37  | 0.30 | -0.17  |
| -0.98 | 2705.00 | 2.96  | 1.25  | -0.39 | 2468.00 | 1.78  | 0.89 | -0.49  |
| -0.82 | 3337.00 | 4.91  | 0.70  | 0.22  | 3890.00 | 1.93  | 0.74 | -0.41  |
| -0.34 | 2253.00 | 3.99  | 0.22  | -0.07 | 3083.00 | 2.98  | 0.31 | 0.17   |
| -0.49 | 2474.00 | 8.21  | 4.00  | 1.25  | 3067.00 | 3.72  | 1.05 | 0.57   |
| -0.36 | 2164.00 | 2.63  | 1.58  | -0.49 | 2484.00 | 2.13  | 0.54 | -0.30  |
| -0.59 | 3051.00 | 10.75 | 6.54  | 2.05  | 3422.00 | 2.75  | 0.08 | 0.04   |
| -0.71 | 3573.00 | 4.70  | 0.49  | 0.15  | 4311.00 | 4.38  | 1.71 | 0.94   |
| -1.16 | 2940.00 | 2.24  | 1.97  | -0.62 | 2673.00 | 1.76  | 0.91 | -0.50  |
| -1.12 | 2167.00 | 1.34  | 2.87  | -0.90 | 2152.00 | 1.67  | 1.00 | -0.55  |
| -0.89 | 2130.00 | 0.94  | 3.27  | -1.03 | 1851.00 | 1.94  | 0.73 | -0.40  |
| 0.59  | 4614.00 | 6.09  | 1.88  | 0.59  | 2571.00 | 1.83  | 0.84 | -0.47  |
| 0.40  | 3197.00 | 3.41  | 0.80  | -0.25 | 2620.00 | 3.24  | 0.57 | 0.31   |
| 0.09  | 3708.00 | 3.94  | 0.27  | -0.09 | 2452.00 | 1.10  | 1.57 | -0.87  |
| -0.63 | 2420.00 | 2.40  | 1.81  | -0.57 | 1627.00 | 1.84  | 0.83 | -0.46  |
| 2.49  | 4269.00 | 16.02 | 11.81 | 3.70  | 3423.00 | 7.54  | 4.87 | 2.68 y |
| -0.01 | 4232.00 | 5.98  | 1.77  | 0.55  | 2641.00 | 2.88  | 0.21 | 0.11   |
| -0.71 | 2792.00 | 6.30  | 2.09  | 0.66  | 1859.00 | 2.42  | 0.25 | -0.14  |
| 1.07  | 4165.00 | 6.43  | 2.22  | 0.70  | 2725.00 | 5.06  | 2.39 | 1.32   |
| -0.10 | 1321.00 | 3.33  | 0.88  | -0.28 | 913.00  | 1.42  | 1.25 | -0.69  |
| 0.25  | 1144.00 | 4.46  | 0.25  | 0.08  | 1145.00 | 6.29  | 3.62 | 1.99   |
| 0.71  | 4797.00 | 6.44  | 2.23  | 0.70  | 3700.00 | 2.86  | 0.19 | 0.11   |
| 0.48  | 2771.00 | 7.72  | 3.51  | 1.10  | 1733.00 | 2.71  | 0.04 | 0.02   |
| 3.01  | 3167.00 | 11.46 | 7.25  | 2.27  | 2936.00 | 6.81  | 4.14 | 2.28 y |

|       |         |       |       |       |         |       |       |        |
|-------|---------|-------|-------|-------|---------|-------|-------|--------|
| -0.62 | 1721.00 | 3.02  | 1.19  | -0.37 | 1584.00 | 4.92  | 2.25  | 1.24   |
| -0.27 | 2607.00 | 8.75  | 4.54  | 1.42  | 1956.00 | 3.53  | 0.86  | 0.47   |
| -0.64 | 2326.00 | 2.36  | 1.85  | -0.58 | 2381.00 | 2.06  | 0.61  | -0.34  |
| 0.86  | 4523.00 | 10.68 | 6.47  | 2.03  | 3738.00 | 3.58  | 0.91  | 0.50   |
| -0.09 | 3322.00 | 7.22  | 3.01  | 0.94  | 3310.00 | 3.53  | 0.86  | 0.47   |
| -0.89 | 1224.00 | 1.63  | 2.58  | -0.81 | 1552.00 | 1.35  | 1.32  | -0.73  |
| -0.69 | 1369.00 | 0.58  | 3.63  | -1.14 | 1499.00 | 2.33  | 0.34  | -0.19  |
| 5.84  | 2195.00 | 23.87 | 19.66 | 6.16  | 1998.00 | 18.87 | 16.20 | 8.92 y |
| 4.64  | 3724.00 | 12.59 | 8.38  | 2.63  | 3129.00 | 8.92  | 6.25  | 3.44 y |
| 1.42  | 3195.00 | 9.20  | 4.99  | 1.56  | 2288.00 | 4.68  | 2.01  | 1.10   |
| 3.01  | 4008.00 | 9.53  | 5.32  | 1.67  | 2803.00 | 5.17  | 2.50  | 1.38   |
| 0.77  | 3180.00 | 3.46  | 0.75  | -0.24 | 2897.00 | 0.59  | 2.08  | -1.15  |
| 0.42  | 3045.00 | 3.48  | 0.73  | -0.23 | 1425.00 | 3.37  | 0.70  | 0.38   |
| -0.13 | 3167.00 | 3.88  | 0.33  | -0.10 | 1606.00 | 4.17  | 1.50  | 0.83   |
| 1.00  | 3997.00 | 4.20  | 0.01  | 0.00  | 1709.00 | 1.81  | 0.86  | -0.47  |
| 0.59  | 2448.00 | 6.37  | 2.16  | 0.68  | 1769.00 | 3.67  | 1.00  | 0.55   |
| -0.62 | 2088.00 | 2.20  | 2.01  | -0.63 | 1808.00 | 3.65  | 0.98  | 0.54   |
| 0.94  | 3341.00 | 4.34  | 0.13  | 0.04  | 2385.00 | 4.91  | 2.24  | 1.23   |
| 1.07  | 3563.00 | 9.99  | 5.78  | 1.81  | 2525.00 | 4.67  | 2.00  | 1.10   |
| 2.29  | 3022.00 | 6.85  | 2.64  | 0.83  | 3018.00 | 3.11  | 0.44  | 0.24   |
| 1.46  | 3524.00 | 9.28  | 5.07  | 1.59  | 2585.00 | 3.87  | 1.20  | 0.66   |
| 1.30  | 3774.00 | 6.89  | 2.68  | 0.84  | 2563.00 | 3.16  | 0.49  | 0.27   |
| 3.23  | 2468.00 | 12.40 | 8.19  | 2.57  | 2326.00 | 6.23  | 3.56  | 1.96 x |
| 0.84  | 2358.00 | 9.84  | 5.63  | 1.76  | 2498.00 | 5.72  | 3.05  | 1.68   |
| 0.91  | 2833.00 | 6.60  | 2.39  | 0.75  | 2528.00 | 2.77  | 0.10  | 0.05   |
| 2.27  | 3120.00 | 11.64 | 7.43  | 2.33  | 3199.00 | 2.72  | 0.05  | 0.03 y |
| -0.68 | 1152.00 | 1.56  | 2.65  | -0.83 | 2233.00 | 1.48  | 1.19  | -0.66  |
| 0.92  | 3809.00 | 4.20  | 0.01  | 0.00  | 4039.00 | 4.18  | 1.51  | 0.83   |
| 1.47  | 2790.00 | 8.57  | 4.36  | 1.36  | 3020.00 | 4.30  | 1.63  | 0.90   |
| 1.11  | 2792.00 | 4.66  | 0.45  | 0.14  | 2783.00 | 1.01  | 1.66  | -0.92  |
| 2.13  | 3254.00 | 4.43  | 0.22  | 0.07  | 2896.00 | 6.22  | 3.55  | 1.95   |
| 3.12  | 2209.00 | 8.51  | 4.30  | 1.35  | 1412.00 | 6.87  | 4.20  | 2.31 y |
| 1.22  | 3173.00 | 10.53 | 6.32  | 1.98  | 1962.00 | 1.78  | 0.89  | -0.49  |
| 1.98  | 4535.00 | 7.19  | 2.98  | 0.93  | 3344.00 | 1.05  | 1.62  | -0.90  |
| 0.52  | 1270.00 | 3.15  | 1.06  | -0.33 | 1072.00 | 2.52  | 0.15  | -0.09  |
| 1.22  | 1408.00 | 4.62  | 0.41  | 0.13  | 1932.00 | 1.71  | 0.96  | -0.53  |
| 1.16  | 3307.00 | 11.37 | 7.16  | 2.24  | 2769.00 | 1.95  | 0.72  | -0.40  |
| 0.34  | 2767.00 | 5.75  | 1.54  | 0.48  | 1773.00 | 1.07  | 1.60  | -0.88  |
| 4.10  | 3143.00 | 13.01 | 8.80  | 2.76  | 2946.00 | 3.73  | 1.06  | 0.58 y |
| 0.09  | 2724.00 | 1.58  | 2.63  | -0.82 | 1862.00 | 2.79  | 0.12  | 0.07   |
| 0.64  | 5093.00 | 7.64  | 3.43  | 1.07  | 3652.00 | 3.23  | 0.56  | 0.31   |
| 0.15  | 3489.00 | 10.06 | 5.85  | 1.83  | 3677.00 | 2.61  | 0.06  | -0.03  |
| 1.63  | 2519.00 | 7.90  | 3.69  | 1.16  | 2239.00 | 1.16  | 1.51  | -0.83  |
| 0.00  | 2457.00 | 5.62  | 1.41  | 0.44  | 1866.00 | 2.63  | 0.04  | -0.03  |
| 1.65  | 3178.00 | 10.89 | 6.68  | 2.09  | 3316.00 | 5.43  | 2.76  | 1.52   |
| 0.70  | 2909.00 | 11.17 | 6.96  | 2.18  | 3562.00 | 7.24  | 4.57  | 2.52 y |
| -0.55 | 1468.00 | 1.36  | 2.85  | -0.89 | 1587.00 | 0.95  | 1.72  | -0.95  |

|         |         |       |         |       |         |       |      |        |
|---------|---------|-------|---------|-------|---------|-------|------|--------|
| -0.65   | 2021.00 | 1.19  | 3.02    | -0.95 | 1665.00 | 0.78  | 1.89 | -1.04  |
| 0.75    | 2969.00 | 4.75  | 0.54    | 0.17  | 3504.00 | 2.08  | 0.59 | -0.33  |
| -0.02   | 2248.00 | 2.09  | 2.12    | -0.66 | 1898.00 | 0.53  | 2.14 | -1.18  |
| -0.15   | 1781.00 | 6.68  | 2.47    | 0.77  | 1530.00 | 1.83  | 0.84 | -0.46  |
| 1.10    | 1660.00 | 7.77  | 3.56    | 1.12  | 1638.00 | 1.40  | 1.27 | -0.70  |
| 3.81    | 1647.00 | 14.39 | 10.18   | 3.19  | 1721.00 | 5.69  | 3.02 | 1.66 x |
| 2.69    | 3333.00 | 15.69 | 11.48   | 3.60  | 2854.00 | 5.96  | 3.29 | 1.81 y |
| 1.48    | 1486.00 | 11.24 | 7.03    | 2.20  | 1420.00 | 2.96  | 0.29 | 0.16   |
| -0.09   | 1832.00 | 4.86  | 0.65    | 0.20  | 2110.00 | 1.75  | 0.92 | -0.51  |
| 3.63    | 3380.00 | 25.27 | 21.06   | 6.60  | 2904.00 | 7.09  | 4.42 | 2.43 y |
| 2.38    | 1913.00 | 9.93  | 5.72    | 1.79  | 2442.00 | 2.87  | 0.20 | 0.11   |
| -0.21   | 1391.00 | 6.54  | 2.33    | 0.73  | 1087.00 | 2.39  | 0.28 | -0.16  |
| 1.36    | 2078.00 | 10.92 | 6.71    | 2.10  | 1661.00 | 3.67  | 1.00 | 0.55   |
| -0.47   | 1819.00 | 2.69  | 1.52    | -0.48 | 1621.00 | 0.86  | 1.81 | -1.00  |
| 1.25    | 2741.00 | 6.02  | 1.81    | 0.57  | 3331.00 | 4.83  | 2.16 | 1.19   |
| 0.18    | 2337.00 | 2.48  | 1.73    | -0.54 | 3075.00 | 2.18  | 0.49 | -0.27  |
| 0.57    | 3369.00 | 12.47 | 8.26    | 2.59  | 2740.00 | 2.85  | 0.18 | 0.10   |
| 0.24    | 3630.00 | 6.78  | 2.57    | 0.80  | 4095.00 | 1.29  | 1.38 | -0.76  |
| 0.88    | 952.00  | 4.52  | 0.31    | 0.10  | 1661.00 | 1.69  | 0.98 | -0.54  |
| -0.02   | 1697.00 | 6.48  | 2.27    | 0.71  | 1616.00 | 6.31  | 3.64 | 2.00   |
| -0.60   | 3051.00 | 3.41  | 0.80    | -0.25 | 2021.00 | 5.10  | 2.43 | 1.33   |
| -0.91   | 1178.00 | 2.89  | 1.32    | -0.42 | 663.00  | 4.22  | 1.55 | 0.85   |
| -0.68   | 1467.00 | 6.27  | 2.06    | 0.65  | 1452.00 | 2.96  | 0.29 | 0.16   |
| 0.54    | 1863.00 | 3.11  | 1.10    | -0.34 | 1248.00 | 5.85  | 3.18 | 1.75   |
| -0.24   | 2922.00 | 6.88  | 2.67    | 0.84  | 2304.00 | 6.08  | 3.41 | 1.87   |
| 0.59    | 2878.00 | 3.72  | 0.49    | -0.15 | 1524.00 | 4.13  | 1.46 | 0.80   |
| -0.40   | 3042.00 | 5.39  | 1.18    | 0.37  | 1481.00 | 3.71  | 1.04 | 0.57   |
| -0.05   | 1945.00 | 6.94  | 2.73    | 0.86  | 994.00  | 9.05  | 6.38 | 3.51   |
| -0.96   | 901.00  | 4.77  | 0.56    | 0.18  | 682.00  | 4.25  | 1.58 | 0.87   |
| -0.76   | 1376.00 | 4.51  | 0.30    | 0.09  | 1292.00 | 6.35  | 3.68 | 2.02   |
| 1.03    | 2295.00 | 9.02  | 4.81    | 1.51  | 1590.00 | 5.47  | 2.80 | 1.54   |
| 1.06    | 1978.00 | 17.54 | 13.33   | 4.18  | 2225.00 | 8.72  | 6.05 | 3.33 y |
| -0.40   | 2747.00 | 7.97  | 3.76    | 1.18  | 2485.00 | 3.02  | 0.35 | 0.19   |
| -0.37   | 1749.00 | 12.41 | 8.20    | 2.57  | 2026.00 | 7.60  | 4.93 | 2.71 x |
| -0.21   | 1343.00 | 6.18  | 1.97    | 0.62  | 1158.00 | 7.17  | 4.50 | 2.47   |
| 2.19    | 1934.00 | 19.49 | 15.28   | 4.79  | 1788.00 | 6.43  | 3.76 | 2.07 y |
| -0.11   | 1117.00 | 10.92 | 6.71    | 2.10  | 1273.00 | 2.20  | 0.47 | -0.26  |
| -1.04   | 1047.00 | 2.29  | 1.92    | -0.60 | 1137.00 | 1.93  | 0.74 | -0.41  |
| -0.95   | 1081.00 | 9.99  | 5.78    | 1.81  | 2711.00 | 2.25  | 0.42 | -0.23  |
|         | 2358.00 | 4.21  | 2.16    |       | 2493.00 | 2.67  | 1.23 |        |
|         |         |       | 6.47    |       |         |       | 3.68 |        |
|         |         |       | 3.19    |       |         |       | 1.82 |        |
| 2771.00 | 26.02   |       | 2817.00 | 24.00 |         |       |      |        |
| 2707.00 | 23.79   |       | 3246.00 | 22.86 | 3848.00 | 15.75 |      |        |
| 3906.00 | 27.06   |       |         |       |         |       |      |        |
| 2645.00 | 22.31   |       | 4419.00 | 31.52 |         |       |      |        |

|         |       |         |       |
|---------|-------|---------|-------|
| 3007.25 | 24.79 | 3494.00 | 26.13 |
| 601.37  | 2.15  | 829.29  | 4.71  |
| 1264.00 | 4.51  | 1149.00 | 2.70  |
| 948.00  | 4.22  | 1230.00 | 4.31  |
| 1336.00 | 3.14  | 1493.00 | 1.14  |
| 1451.00 | 4.00  | 1425.00 | 7.09  |
| 1249.75 | 3.97  | 1324.25 | 3.81  |
| 215.40  | 0.59  | 161.48  | 2.54  |
|         | 6.44  |         | 14.12 |
|         | 1.76  |         | 7.62  |
|         | 8.21  |         | 21.75 |
|         | 20.83 |         | 22.32 |
|         | 0.39  |         | 0.97  |
|         | 0.61  |         | 0.03  |







art b,c





art a,c

toxic b,c

art a,c, tox b

| Plate    | Well | Gene                            | GeneID            | Cell Count | % inf | Abs Dev |
|----------|------|---------------------------------|-------------------|------------|-------|---------|
| 50022.00 | A02  | M-013209- Wilms tumor upstre    | 51352.00 WIT1     | 2936.00    | 1.74  | 1.79    |
| 50022.00 | A04  | M-011046- hemoglobin, alpha 2   | 3040.00 HBA2      | 3982.00    | 3.01  | 0.52    |
| 50022.00 | A05  | M-008632- farnesyl diphosphat   | 2224.00 FDPS      | 3022.00    | 1.26  | 2.27    |
| 50022.00 | A06  | M-031782- ubiquitin-conjugatin  | 7325.00 UBE2E2    | 4683.00    | 2.54  | 0.99    |
| 50022.00 | A07  | M-013010- fasciculation and elc | 9638.00 FEZ1      | 2723.00    | 0.59  | 2.94    |
| 50022.00 | A08  | M-020419- hypoxia-inducible pr  | 29923.00 HIG2     | 2650.00    | 2.34  | 1.19    |
| 50022.00 | A09  | M-007901- fibrinogen alpha cha  | 2243.00 FGA       | 942.00     | 3.29  | 0.24    |
| 50022.00 | A10  | M-003899- chromosome 2 oper     | 192137.00 C2orf12 | 2449.00    | 1.67  | 1.86    |
| 50022.00 | A11  | M-007902- fibrinogen beta chai  | 2244.00 FGB       | 2422.00    | 3.43  | 0.10    |
| 50022.00 | A12  | M-012406- frequently rearrang   | 23401.00 FRAT2    | 3512.00    | 4.30  | 0.77    |
| 50022.00 | A13  | M-013145- fibroblast growth fa  | 2257.00 FGF12     | 1476.00    | 1.29  | 2.24    |
| 50022.00 | A14  | M-032286- forkhead box G1C      | 2292.00 FOXG1C    | 941.00     | 1.49  | 2.04    |
| 50022.00 | A15  | M-006695- fibroblast growth fa  | 2247.00 FGF2      | 2260.00    | 5.80  | 2.27    |
| 50022.00 | A16  | M-011863- forkhead box E1 (th   | 2304.00 FOXE1     | 1922.00    | 1.51  | 2.02    |
| 50022.00 | A17  | M-019117- FGFR1 oncogene pa     | 11116.00 FGFR1OP  | 2921.00    | 4.69  | 1.16    |
| 50022.00 | A18  | M-019348- chromosome 12 ope     | 51275.00 C12orf47 | 4024.00    | 3.65  | 0.12    |
| 50022.00 | A19  | M-007903- fibrinogen gamma c    | 2266.00 FGG       | 3151.00    | 2.95  | 0.58    |
| 50022.00 | A20  | M-021179- family with sequenc   | 54478.00 FAM64A   | 3495.00    | 3.18  | 0.35    |
| 50022.00 | A21  | M-009512- fumarate hydratase    | 2271.00 FH        | 2949.00    | 5.87  | 2.34    |
| 50022.00 | A23  | M-006905- four and a half LIM c | 9457.00 FHL5      | 1787.00    | 1.29  | 2.24    |
| 50022.00 | B02  | M-008605- mediator of RNA po    | 112950.00 MED8    | 1662.00    | 4.81  | 1.28    |
| 50022.00 | B04  | M-013750- Mdm4, transformed     | 56890.00 MDM1     | 2841.00    | 2.92  | 0.61    |
| 50022.00 | B05  | M-011689- high-mobility group   | 3148.00 HMGB2     | 4140.00    | 5.99  | 2.46    |
| 50022.00 | B06  | M-016082- MAM domain conta      | 266727.00 MDGA1   | 3358.00    | 1.55  | 1.98    |
| 50022.00 | B07  | M-019958- high-mobility group   | 3149.00 HMGB3     | 3033.00    | 1.71  | 1.82    |
| 50022.00 | B08  | M-003506- mediator of DNA da    | 9656.00 MDC1      | 2607.00    | 2.34  | 1.19    |
| 50022.00 | B09  | M-032258- immunoglobulin hea    | 3503.00 IGHG4     | 1330.00    | 3.99  | 0.46    |
| 50022.00 | B10  | M-020590- malignant T cell am   | 28985.00 MCTS1    | 1705.00    | 0.59  | 2.94    |
| 50022.00 | B11  | M-027162- immunoglobulin hea    | 3507.00 IGHM      | 2953.00    | 4.40  | 0.87    |
| 50022.00 | B12  | M-020603- mbt domain contain    | 54799.00 MBTD1    | 2177.00    | 1.79  | 1.74    |
| 50022.00 | B13  | M-032259- immunoglobulin ka     | 3514.00 IGKC      | 2586.00    | 1.20  | 2.33    |
| 50022.00 | B14  | M-017393- methyl-CpG binding    | 85509.00 MBD3L1   | 1747.00    | 4.01  | 0.48    |
| 50022.00 | B15  | M-032277- immunoglobulin larr   | 28831.00 IGLJ3    | 2559.00    | 1.33  | 2.20    |
| 50022.00 | B16  | M-010092- MYC associated fact   | 4149.00 MAX       | 2907.00    | 0.28  | 3.25    |
| 50022.00 | B17  | M-011876- immunoglobulin larr   | 3543.00 IGLL1     | 1610.00    | 1.43  | 2.10    |
| 50022.00 | B18  | M-013153- solute carrier family | 51151.00 SLC45A2  | 2007.00    | 0.85  | 2.68    |
| 50022.00 | B19  | M-014015- glucose-6-phosphat    | 57818.00 G6PC2    | 1877.00    | 1.60  | 1.93    |
| 50022.00 | B20  | M-004772- myristoylated alanir  | 4082.00 MARCKS    | 2193.00    | 1.69  | 1.84    |
| 50022.00 | B21  | M-007929- interleukin 12A (nat  | 3592.00 IL12A     | 4809.00    | 4.66  | 1.13    |
| 50022.00 | B23  | M-004704- interleukin 13        | 3596.00 IL13      | 5039.00    | 2.38  | 1.15    |
| 50022.00 | C02  | M-011654- acyl-CoA synthetase   | 2180.00 ACSL1     | 3923.00    | 1.38  | 2.15    |
| 50022.00 | C04  | M-010965- high-mobility group   | 27126.00 HMG1L10  | 4670.00    | 3.81  | 0.28    |
| 50022.00 | C05  | M-004427- apoptosis inhibitor   | 59347.00 FKSG2    | 3595.00    | 1.25  | 2.28    |
| 50022.00 | C06  | M-019647- human immunodef       | 3096.00 HIVEP1    | 3121.00    | 0.26  | 3.27    |
| 50022.00 | C07  | M-003892- Friend leukemia viru  | 2313.00 FLI1      | 2996.00    | 2.04  | 1.49    |
| 50022.00 | C08  | M-011459- histone cluster 1, H4 | 8362.00 HIST1H4K  | 3045.00    | 1.41  | 2.12    |

|          |     |                                 |           |          |         |      |      |
|----------|-----|---------------------------------|-----------|----------|---------|------|------|
| 50022.00 | C09 | M-021085- transmembrane pro     | 55076.00  | TMEM45A  | 2630.00 | 4.75 | 1.22 |
| 50022.00 | C10 | M-011461- histone cluster 1, H4 | 8364.00   | HIST1H4C | 1299.00 | 1.85 | 1.68 |
| 50022.00 | C11 | M-020318- pleckstrin homology   | 55200.00  | PLEKHG6  | 2851.00 | 1.86 | 1.67 |
| 50022.00 | C12 | M-011463- histone cluster 1, H4 | 8366.00   | HIST1H4B | 2304.00 | 1.56 | 1.97 |
| 50022.00 | C13 | M-018145- transmembrane pro     | 55219.00  | TMEM57   | 2761.00 | 3.19 | 0.34 |
| 50022.00 | C14 | M-011450- histone cluster 1, H3 | 8351.00   | HIST1H3D | 2973.00 | 1.85 | 1.68 |
| 50022.00 | C15 | M-020397- cyclin J              | 54619.00  | CCNJ     | 3173.00 | 2.99 | 0.54 |
| 50022.00 | C16 | M-011481- HIRA interacting pro  | 8479.00   | HIRIP3   | 1503.00 | 6.59 | 3.06 |
| 50022.00 | C17 | M-020280- chromosome 1 oper     | 55765.00  | C1orf106 | 4453.00 | 7.21 | 3.68 |
| 50022.00 | C18 | M-005001- huntingtin interactir | 3092.00   | HIP1     | 2458.00 | 3.54 | 0.01 |
| 50022.00 | C19 | M-006810- hypothetical proteir  | 55277.00  | FLJ10986 | 3435.00 | 5.76 | 2.23 |
| 50022.00 | C20 | M-018500- histidine triad nucle | 3094.00   | HINT1    | 4070.00 | 4.23 | 0.70 |
| 50022.00 | C21 | M-026895- FYVE, RhoGEF and P    | 55785.00  | FGD6     | 2727.00 | 1.25 | 2.28 |
| 50022.00 | C23 | M-014393- SAP30-like            | 79685.00  | SAP30L   | 2931.00 | 5.94 | 2.41 |
| 50022.00 | D02 | M-010183- monoamine oxidase     | 4129.00   | MAOB     | 2888.00 | 3.81 | 0.28 |
| 50022.00 | D04 | M-008328- mannosidase, alpha    | 4123.00   | MAN2C1   | 4121.00 | 2.77 | 0.76 |
| 50022.00 | D05 | M-027180- integrin-linked kinas | 55522.00  | ILK-2    | 4069.00 | 3.66 | 0.13 |
| 50022.00 | D06 | M-013417- mastermind-like 1 (l  | 9794.00   | MAML1    | 2813.00 | 4.23 | 0.70 |
| 50022.00 | D07 | M-014334- leukocyte immunog     | 79166.00  | LILRP2   | 3198.00 | 4.07 | 0.54 |
| 50022.00 | D08 | M-009135- melanoma antigen f    | 28986.00  | MAGEH1   | 2465.00 | 2.56 | 0.97 |
| 50022.00 | D09 | M-014335- leukocyte immunog     | 79168.00  | LILRA6   | 2482.00 | 2.34 | 1.19 |
| 50022.00 | D10 | M-006682- melanoma antigen f    | 9500.00   | MAGED1   | 2845.00 | 2.46 | 1.07 |
| 50022.00 | D11 | M-003976- insulin-like growth f | 10643.00  | IGF2BP3  | 2232.00 | 2.91 | 0.62 |
| 50022.00 | D12 | M-017226- melanoma antigen f    | 139081.00 | MAGEC3   | 2103.00 | 4.56 | 1.03 |
| 50022.00 | D13 | M-009687- IMP (inosine monop    | 3614.00   | IMPDH1   | 2355.00 | 8.03 | 4.50 |
| 50022.00 | D14 | M-016192- SMAD family memb      | 4093.00   | SMAD9    | 1717.00 | 1.11 | 2.42 |
| 50022.00 | D15 | M-019614- interphotoreceptor    | 3617.00   | IMPG1    | 2071.00 | 4.35 | 0.82 |
| 50022.00 | D16 | M-003272- MAD2 mitotic arrest   | 10459.00  | MAD2L2   | 2281.00 | 3.90 | 0.37 |
| 50022.00 | D17 | M-020890- interphotoreceptor    | 50939.00  | IMPG2    | 3605.00 | 5.30 | 1.77 |
| 50022.00 | D18 | M-003271- MAD2 mitotic arrest   | 4085.00   | MAD2L1   | 1121.00 | 5.44 | 1.91 |
| 50022.00 | D19 | M-015214- inhibitor of growth f | 27160.00  | INGX     | 3589.00 | 5.68 | 2.15 |
| 50022.00 | D20 | M-006825- MAD1 mitotic arrest   | 8379.00   | MAD1L1   | 2520.00 | 4.17 | 0.64 |
| 50022.00 | D21 | M-011299- inositol polyphospha  | 3631.00   | INPP4A   | 3183.00 | 7.51 | 3.98 |
| 50022.00 | D23 | M-020409- inositol polyphospha  | 22876.00  | INPP5F   | 2401.00 | 2.79 | 0.74 |
| 50022.00 | E02 | M-009852- 3-hydroxyisobutyryl   | 26275.00  | HIBCH    | 5334.00 | 0.94 | 2.59 |
| 50022.00 | E04 | M-020000- HERV-H LTR-associat   | 10086.00  | HHLA1    | 2784.00 | 0.32 | 3.21 |
| 50022.00 | E05 | M-016207- gasdermin domain c    | 79792.00  | GSDMDC1  | 4905.00 | 0.80 | 2.73 |
| 50022.00 | E06 | M-021212- RAB GTPase activati   | 9910.00   | RABGAP1L | 3219.00 | 0.56 | 2.97 |
| 50022.00 | E07 | M-010289- acyltransferase like  | 79888.00  | AYTL2    | 3416.00 | 1.49 | 2.04 |
| 50022.00 | E08 | M-007920- complement factor     | 3075.00   | CFH      | 3209.00 | 0.93 | 2.60 |
| 50022.00 | E09 | M-008447- microcephaly, prima   | 79648.00  | MCPH1    | 1771.00 | 1.13 | 2.40 |
| 50022.00 | E10 | M-008408- hairy and enhancer    | 55502.00  | HES6     | 2903.00 | 1.38 | 2.15 |
| 50022.00 | E11 | M-014509- WD repeat domain      | 79968.00  | WDR76    | 2655.00 | 0.87 | 2.66 |
| 50022.00 | E12 | M-020918- homocysteine-induc    | 9709.00   | HERPUD1  | 2132.00 | 0.28 | 3.25 |
| 50022.00 | E13 | M-014496- cyclin N-terminal do  | 79935.00  | CNTD2    | 2142.00 | 1.07 | 2.46 |
| 50022.00 | E14 | M-004106- NDC80 homolog, kir    | 10403.00  | NDC80    | 1093.00 | 1.37 | 2.16 |
| 50022.00 | E15 | M-014463- thrombospondin, ty    | 79875.00  | THSD4    | 2922.00 | 0.99 | 2.54 |

|              |                                  |                    |         |       |       |
|--------------|----------------------------------|--------------------|---------|-------|-------|
| 50022.00 E16 | M-005100- hematopoietic cell s   | 10870.00 HCST      | 3308.00 | 1.39  | 2.14  |
| 50022.00 E17 | M-018626- zinc finger protein 6  | 79788.00 ZNF665    | 3384.00 | 2.54  | 0.99  |
| 50022.00 E18 | M-016834- SAP30 binding prote    | 29115.00 SAP30BP   | 3083.00 | 1.56  | 1.97  |
| 50022.00 E19 | M-015006- chromosome 9 oper      | 84904.00 C9orf100  | 1198.00 | 1.17  | 2.36  |
| 50022.00 E20 | M-016920- LETM1 domain cont      | 25875.00 LETMD1    | 4380.00 | 1.76  | 1.77  |
| 50022.00 E21 | M-020676- hypothetical proteir   | 54848.00 FLJ20184  | 3450.00 | 0.61  | 2.92  |
| 50022.00 E23 | M-016819- leucine rich repeat c  | 55631.00 LRRC40    | 3003.00 | 1.70  | 1.83  |
| 50022.00 F02 | M-012852- mab-21-like 2 (C. ele  | 10586.00 MAB21L2   | 3279.00 | 0.49  | 3.04  |
| 50022.00 F04 | M-012125- mab-21-like 1 (C. ele  | 4081.00 MAB21L1    | 2552.00 | 1.72  | 1.81  |
| 50022.00 F05 | M-032273- insulin activator fact | 3637.00 INSAF      | 4038.00 | 3.52  | 0.01  |
| 50022.00 F06 | M-012318- leucine-zipper-like ti | 8216.00 LZTR1      | 2399.00 | 3.04  | 0.49  |
| 50022.00 F07 | M-017880- insulin induced gene   | 3638.00 INSIG1     | 2829.00 | 1.98  | 1.55  |
| 50022.00 F08 | M-031982- leucine zipper trans   | 54585.00 LZTFL1    | 3803.00 | 1.89  | 1.64  |
| 50022.00 F09 | M-021039- insulin induced gene   | 51141.00 INSIG2    | 3946.00 | 6.54  | 3.01  |
| 50022.00 F10 | M-011079- lysozyme (renal amy    | 4069.00 LYZ        | 1512.00 | 2.12  | 1.41  |
| 50022.00 F11 | M-010584- Fc receptor-like 4     | 83417.00 FCRL4     | 2798.00 | 0.93  | 2.60  |
| 50022.00 F12 | M-015814- lymphoblastic leuke    | 4066.00 LYL1       | 2178.00 | 0.60  | 2.93  |
| 50022.00 F13 | M-010583- Fc receptor-like 5     | 83416.00 FCRL5     | 2317.00 | 0.95  | 2.58  |
| 50022.00 F14 | M-015383- cisplatin resistance-i | 51747.00 CROP      | 1808.00 | 2.65  | 0.88  |
| 50022.00 F15 | M-020007- iroquois homeobox      | 10265.00 IRX5      | 3719.00 | 4.19  | 0.66  |
| 50022.00 F16 | M-008637- leukotriene C4 synt    | 4056.00 LTC4S      | 2539.00 | 0.87  | 2.66  |
| 50022.00 F17 | M-011707- ISL1 transcription fa  | 3670.00 ISL1       | 3639.00 | 1.29  | 2.24  |
| 50022.00 F18 | M-014144- latent transforming    | 4054.00 LTBP3      | 2707.00 | 1.15  | 2.38  |
| 50022.00 F19 | M-008000- integrin, alpha 11     | 22801.00 ITGA11    | 3429.00 | 2.04  | 1.49  |
| 50022.00 F20 | M-005935- leukotriene A4 hydr    | 4048.00 LTA4H      | 3455.00 | 3.47  | 0.06  |
| 50022.00 F21 | M-032260- integrin, alpha D      | 3681.00 ITGAD      | 4351.00 | 6.76  | 3.23  |
| 50022.00 F23 | M-008013- integrin, beta 7       | 3695.00 ITGB7      | 3638.00 | 2.06  | 1.47  |
| 50022.00 G02 | M-006628- FUN14 domain cont      | 65991.00 FUNDC2    | 3634.00 | 4.07  | 0.54  |
| 50022.00 G04 | M-012055- hemoglobin, zeta       | 3050.00 HBZ        | 4432.00 | 6.95  | 3.42  |
| 50022.00 G05 | M-014444- glutamine and serin    | 79832.00 QSER1     | 4121.00 | 2.89  | 0.64  |
| 50022.00 G06 | M-012054- hemoglobin, theta 1    | 3049.00 HBQ1       | 2470.00 | 20.12 | 16.59 |
| 50022.00 G07 | M-016961- RNA binding motif a    | 84173.00 RBED1     | 2483.00 | 5.28  | 1.75  |
| 50022.00 G08 | M-011116- hemoglobin, gamma      | 3048.00 HBG2       | 2068.00 | 3.38  | 0.15  |
| 50022.00 G09 | M-016231- armadillo repeat cor   | 79637.00 ARMC7     | 2289.00 | 1.05  | 2.48  |
| 50022.00 G10 | M-012069- hemoglobin, epsilon    | 3046.00 HBE1       | 2554.00 | 9.83  | 6.30  |
| 50022.00 G11 | M-015783- rhomboid 5 homolo      | 79651.00 RHBDF2    | 2500.00 | 3.88  | 0.35  |
| 50022.00 G12 | M-011048- hemoglobin, delta      | 3045.00 HBD        | 1778.00 | 10.97 | 7.44  |
| 50022.00 G13 | M-014581- ATH1, acid trehalase   | 80162.00 ATHL1     | 2223.00 | 5.13  | 1.60  |
| 50022.00 G14 | M-008817- atonal homolog 8 (D    | 84913.00 ATOH8     | 3074.00 | 5.11  | 1.58  |
| 50022.00 G15 | M-018769- zinc finger protein 5  | 151126.00 ZNF533   | 3093.00 | 6.21  | 2.68  |
| 50022.00 G16 | M-011490- histone acetyltransf   | 8520.00 HAT1       | 3678.00 | 6.72  | 3.19  |
| 50022.00 G17 | M-015711- heat shock transcrip   | 159119.00 HSFY2    | 2022.00 | 14.10 | 10.57 |
| 50022.00 G18 | M-020779- cell division cycle 37 | 55664.00 CDC37L1   | 3355.00 | 12.73 | 9.20  |
| 50022.00 G19 | M-016758- zinc finger, DHHC-ty   | 253832.00 ZDHHC20  | 3566.00 | 8.75  | 5.22  |
| 50022.00 G20 | M-011560- huntingtin-associate   | 9001.00 HAP1       | 3910.00 | 12.23 | 8.70  |
| 50022.00 G21 | M-015618- mesoderm inductor      | 166968.00 MIER3    | 2416.00 | 8.24  | 4.71  |
| 50022.00 G23 | M-017037- hypothetical proteir   | 158677.00 FLJ38564 | 3365.00 | 2.44  | 1.09  |



|                     |                                       |                 |               |                |              |              |
|---------------------|---------------------------------------|-----------------|---------------|----------------|--------------|--------------|
| 50022.00 H02        | M-020025- leucine rich repeat c       | 10234.00        | LRRC17        | 3773.00        | 2.62         | 0.91         |
| 50022.00 H04        | M-018629- low density lipoprot        | 84918.00        | LRP11         | 1674.00        | 6.45         | 2.92         |
| 50022.00 H05        | M-008014- integrin, beta 8            | 3696.00         | ITGB8         | 2893.00        | 3.84         | 0.31         |
| 50022.00 H06        | M-018824- low density lipoprot        | 26020.00        | LRP10         | 2873.00        | 5.22         | 1.69         |
| 50022.00 H07        | M-019854- integrin, beta-like 1       | 9358.00         | ITGBL1        | 2910.00        | 2.92         | 0.61         |
| <b>50022.00 H08</b> | <b>M-012233- lymphoid-restricted</b>  | <b>4033.00</b>  | <b>LRMP</b>   | <b>3690.00</b> | <b>14.09</b> | <b>10.56</b> |
| 50022.00 H09        | M-003828- integral membrane           | 9445.00         | ITM2B         | 2486.00        | 2.70         | 0.83         |
| 50022.00 H10        | M-013940- leucine-rich repeats        | 26018.00        | LRIG1         | 1560.00        | 1.35         | 2.18         |
| 50022.00 H11        | M-019071- G protein-coupled r         | 160897.00       | GPR180        | 3622.00        | 4.03         | 0.50         |
| 50022.00 H12        | M-004428- leucine-rich repeats        | 55367.00        | LRDD          | 1762.00        | 3.41         | 0.12         |
| 50022.00 H13        | M-009841- intersectin 2               | 50618.00        | ITSN2         | 1991.00        | 2.46         | 1.07         |
| 50022.00 H14        | M-012751- LPS-responsive vesic        | 987.00          | LRBA          | 3715.00        | 6.57         | 3.04         |
| 50022.00 H15        | M-013174- junctophilin 3              | 57338.00        | JPH3          | 1943.00        | 3.71         | 0.18         |
| 50022.00 H16        | M-009746- leupaxin                    | 9404.00         | LPXN          | 2629.00        | 9.01         | <b>5.48</b>  |
| 50022.00 H17        | M-011514- jerky homolog-like (        | 8690.00         | JRKL          | 2832.00        | 4.34         | 0.81         |
| 50022.00 H18        | M-013736- lipid phosphate pho         | 64748.00        | LPPR2         | 2961.00        | 4.66         | 1.13         |
| <b>50022.00 H19</b> | <b>M-011708- junction plakoglobin</b> | <b>3728.00</b>  | <b>JUP</b>    | <b>4913.00</b> | <b>13.05</b> | <b>9.52</b>  |
| 50022.00 H20        | M-020012- LIM domain contain          | 4026.00         | LPP           | 3411.00        | 7.53         | 4.00         |
| 50022.00 H21        | M-003901- CD82 molecule               | 3732.00         | CD82          | 3883.00        | 9.86         | <b>6.33</b>  |
| 50022.00 H23        | M-008831- potassium voltage-g         | 7881.00         | KCNAB1        | 3626.00        | 5.32         | 1.79         |
| 50022.00 I02        | M-008698- heart and neural cre        | 9464.00         | HAND2         | 4197.00        | 3.38         | 0.15         |
| 50022.00 I04        | M-019999- WD repeat domain (          | 10238.00        | WDR68         | 3857.00        | 5.47         | 1.94         |
| 50022.00 I05        | M-011272- filamin C, gamma (a         | 2318.00         | FLNC          | 2985.00        | 2.41         | 1.12         |
| 50022.00 I06        | M-009629- hydroxyacylglutathi         | 84264.00        | HAGHL         | 3942.00        | 6.19         | 2.66         |
| 50022.00 I07        | M-009243- flavin containing mc        | 2328.00         | FMO3          | 2120.00        | 2.50         | 1.03         |
| 50022.00 I08        | M-008280- hydroxyacyl-Coenzy          | 3032.00         | HADHB         | 3011.00        | 2.29         | 1.24         |
| 50022.00 I09        | M-019632- AF4/FMR2 family, r          | 2334.00         | AFF2          | 4152.00        | 4.94         | 1.41         |
| 50022.00 I10        | M-023893- histocompatibility (r       | 23526.00        | HMHA1         | 3206.00        | 2.65         | 0.88         |
| 50022.00 I11        | M-012036- frequently rearrange        | 10023.00        | FRAT1         | 3056.00        | 1.90         | 1.63         |
| 50022.00 I12        | M-010913- H2A histone family,         | 55506.00        | H2AFY2        | 2064.00        | 2.23         | 1.30         |
| 50022.00 I13        | M-019576- fascin homolog 1, ac        | 6624.00         | FSCN1         | 2962.00        | 1.59         | 1.94         |
| 50022.00 I14        | M-032256- H19, imprinted mat          | 283120.00       | H19           | 3760.00        | 1.46         | 2.07         |
| 50022.00 I15        | M-012098- follistatin-like 3 (sec     | 10272.00        | FSTL3         | 2416.00        | 7.28         | 3.75         |
| 50022.00 I16        | M-011680- glycophorin C (Gerb         | 2995.00         | GYPC          | 4318.00        | 2.76         | 0.77         |
| 50022.00 I17        | M-016214- ferritin, light polype      | 2512.00         | FTL           | 3617.00        | 1.80         | 1.73         |
| 50022.00 I18        | M-011678- glycophorin A (MNS          | 2993.00         | GYPA          | 3713.00        | 4.87         | 1.34         |
| 50022.00 I19        | M-009211- fucosidase, alpha-L         | 2519.00         | FUCA2         | 2990.00        | 1.44         | 2.09         |
| 50022.00 I20        | M-019952- guanylate cyclase ac        | 9626.00         | GUCA1C        | 4874.00        | 1.31         | 2.22         |
| 50022.00 I21        | M-009497- fusion (involved in t       | 2521.00         | FUS           | 2808.00        | 3.10         | 0.43         |
| 50022.00 I23        | M-008172- fucosyltransferase 3        | 2525.00         | FUT3          | 3646.00        | 0.88         | 2.65         |
| 50022.00 J02        | M-005107- loss of heterozygosi        | 4013.00         | LOH11CR2/     | 2178.00        | 2.80         | 0.73         |
| 50022.00 J04        | M-015773- RNA polymerase I tr         | 94431.00        | LOC94431      | 2466.00        | 3.20         | 0.33         |
| 50022.00 J05        | M-012452- KCNE1-like                  | 23630.00        | KCNE1L        | 3089.00        | 3.40         | 0.13         |
| <b>50022.00 J06</b> | <b>M-018365- transmembrane pro</b>    | <b>93380.00</b> | <b>TMEM32</b> | <b>3523.00</b> | <b>11.55</b> | <b>8.02</b>  |
| 50022.00 J07        | M-006275- potassium voltage-g         | 56479.00        | KCNQ5         | 2119.00        | 5.71         | 2.18         |
| 50022.00 J08        | M-017755- hypothetical proteir        | 90925.00        | LOC90925      | 2001.00        | 3.85         | 0.32         |
| 50022.00 J09        | M-005903- Kell blood group, m         | 3792.00         | KEL           | 4601.00        | 3.00         | 0.53         |

|                     |                                       |                 |                 |                |              |             |
|---------------------|---------------------------------------|-----------------|-----------------|----------------|--------------|-------------|
| 50022.00 J10        | M-016548- coiled-coil domain c        | 90557.00        | CCDC74A         | 1567.00        | 1.40         | 2.13        |
| 50022.00 J11        | M-012764- keratocan                   | 11081.00        | KERA            | 1681.00        | 6.48         | 2.95        |
| 50022.00 J12        | M-016673- MTERF domain cont           | 80298.00        | MTERFD3         | 2402.00        | 5.33         | 1.80        |
| 50022.00 J13        | M-020735- leucine rich repeat c       | 9684.00         | LRRC14          | 2778.00        | 3.28         | 0.25        |
| 50022.00 J14        | M-016114- NADH dehydrogena            | 56901.00        | NDUFA4L2        | 3193.00        | 4.42         | 0.89        |
| 50022.00 J15        | M-026775- transmembrane pro           | 23027.00        | TMEM41B         | 3493.00        | 4.15         | 0.62        |
| 50022.00 J16        | M-018664- BAI1-associated pro         | 55971.00        | BAIAP2L1        | 4203.00        | 5.04         | 1.51        |
| 50022.00 J17        | M-025495- KIAA0265 protein            | 23008.00        | KIAA0265        | 3823.00        | 4.58         | 1.05        |
| 50022.00 J18        | M-032271- hypothetical proteir        | 254571.00       | LOC254571       | 2714.00        | 2.69         | 0.84        |
| <b>50022.00 J19</b> | <b>M-019141- KIAA0274</b>             | <b>9896.00</b>  | <b>KIAA0274</b> | <b>4036.00</b> | <b>13.50</b> | <b>9.97</b> |
| 50022.00 J20        | M-032270- hypothetical proteir        | 253039.00       | LOC253039       | 2339.00        | 6.71         | 3.18        |
| 50022.00 J21        | M-020971- ADAMTS-like 2               | 9719.00         | ADAMTSL2        | 4426.00        | 4.36         | 0.83        |
| 50022.00 J23        | M-023594- transmembrane anc           | 23023.00        | TMCC1           | 3846.00        | 5.62         | 2.09        |
| 50022.00 K02        | M-019288- guanylate cyclase ac        | 2978.00         | GUCA1A          | 2101.00        | 3.38         | 0.15        |
| 50022.00 K04        | M-005286- G-2 and S-phase exp         | 51512.00        | GTSE1           | 3137.00        | 2.23         | 1.30        |
| 50022.00 K05        | M-003672- interferon, alpha-inc       | 2537.00         | IFI6            | 2823.00        | 11.30        | 7.77        |
| 50022.00 K06        | M-020031- general transcrip           | 9328.00         | GTF3C5          | 5034.00        | 5.76         | 2.23        |
| 50022.00 K07        | M-026790- chromosome 11 op            | 25758.00        | C11orf41        | 3545.00        | 1.21         | 2.32        |
| 50022.00 K08        | M-019620- general transcrip           | 2976.00         | GTF3C2          | 2832.00        | 2.90         | 0.63        |
| 50022.00 K09        | M-015549- glucose 6 phosphata         | 92579.00        | G6PC3           | 2419.00        | 1.57         | 1.96        |
| 50022.00 K10        | M-028674- general transcrip           | 2968.00         | GTF2H4          | 1312.00        | 10.67        | 7.14        |
| 50022.00 K11        | M-008881- glucosidase, alpha; a       | 2548.00         | GAA             | 2474.00        | 4.73         | 1.20        |
| 50022.00 K12        | M-011181- glutathione S-transf        | 2953.00         | GSTT2           | 1817.00        | 2.20         | 1.33        |
| 50022.00 K13        | M-015239- GRB2-associated bir         | 139716.00       | GAB3            | 2036.00        | 6.48         | 2.95        |
| 50022.00 K14        | M-011180- glutathione S-transf        | 2952.00         | GSTT1           | 3568.00        | 10.06        | 6.53        |
| <b>50022.00 K15</b> | <b>M-014715- GABA(A) receptor-a</b>   | <b>23710.00</b> | <b>GABARAPL</b> | <b>3203.00</b> | <b>9.15</b>  | <b>5.62</b> |
| 50022.00 K16        | M-011179- glutathione S-transf        | 2950.00         | GSTP1           | 3796.00        | 3.27         | 0.26        |
| 50022.00 K17        | M-008247- glutamate decarbox          | 2572.00         | GAD2            | 2752.00        | 6.14         | 2.61        |
| 50022.00 K18        | M-019644- G1 to S phase transi        | 2935.00         | GSPT1           | 2960.00        | 1.69         | 1.84        |
| <b>50022.00 K19</b> | <b>M-003894- growth arrest and D</b>  | <b>4616.00</b>  | <b>GADD45B</b>  | <b>5481.00</b> | <b>12.84</b> | <b>9.31</b> |
| 50022.00 K20        | M-032230- GRIP1 associated pr         | 56850.00        | GRIPAP1         | 3999.00        | 7.33         | 3.80        |
| 50022.00 K21        | M-011665- growth arrest-specif        | 2619.00         | GAS1            | 4203.00        | 5.47         | 1.94        |
| <b>50022.00 K23</b> | <b>M-012037- growth arrest-specif</b> | <b>2620.00</b>  | <b>GAS2</b>     | <b>4966.00</b> | <b>9.32</b>  | <b>5.79</b> |
| 50022.00 L02        | M-015971- similar to common s         | 124220.00       | LOC12422C       | 2302.00        | 5.30         | 1.77        |
| 50022.00 L04        | M-004301- poliovirus receptor-i       | 81607.00        | PVRL4           | 1269.00        | 1.73         | 1.80        |
| 50022.00 L05        | M-025298- KIAA0960 protein            | 23249.00        | KIAA0960        | 4039.00        | 4.63         | 1.10        |
| 50022.00 L06        | M-012124- LIM domain only 4           | 8543.00         | LMO4            | 2291.00        | 2.05         | 1.48        |
| 50022.00 L07        | M-022166- kazrin                      | 23254.00        | KIAA1026        | 3964.00        | 1.67         | 1.87        |
| 50022.00 L08        | M-012123- LIM domain only 2 (         | 4005.00         | LMO2            | 3172.00        | 6.90         | 3.37        |
| 50022.00 L09        | M-009502- forkhead box J3             | 22887.00        | FOXJ3           | 2810.00        | 1.25         | 2.28        |
| 50022.00 L10        | M-011721- LIM domain only 1 (         | 4004.00         | LMO1            | 2801.00        | 3.78         | 0.25        |
| 50022.00 L11        | M-010722- endoplasmic reticul         | 57222.00        | ERGIC1          | 3926.00        | 4.64         | 1.11        |
| 50022.00 L12        | M-005270- lamin B1                    | 4001.00         | LMNB1           | 2407.00        | 6.90         | 3.37        |
| 50022.00 L13        | M-022416- ADAMTS-like 3               | 57188.00        | ADAMTSL3        | 2268.00        | 5.47         | 1.94        |
| 50022.00 L14        | M-009672- lipolysis stimulated l      | 51599.00        | LSR             | 3663.00        | 6.74         | 3.21        |
| 50022.00 L15        | M-023583- poly (ADP-ribose) pc        | 54625.00        | PARP14          | 5255.00        | 11.13        | 7.60        |
| 50022.00 L16        | M-009441- lipase, hormone-ser         | 3991.00         | LIPE            | 1581.00        | 2.21         | 1.32        |

|                     |                                       |                 |                 |                |              |              |
|---------------------|---------------------------------------|-----------------|-----------------|----------------|--------------|--------------|
| 50022.00 L17        | M-026434- KIAA1274                    | 27143.00        | KIAA1274        | 3930.00        | 8.47         | 4.94         |
| 50022.00 L18        | M-011999- LIM and senescent c         | 3987.00         | LIMS1           | 3262.00        | 1.87         | 1.66         |
| 50022.00 L19        | M-019274- KIAA1609                    | 57707.00        | KIAA1609        | 3928.00        | 4.68         | 1.15         |
| 50022.00 L20        | M-016292- lens intrinsic membr        | 3982.00         | LIM2            | 2614.00        | 4.48         | 0.95         |
| 50022.00 L21        | M-013007- KIAA1622                    | 57718.00        | KIAA1622        | 3335.00        | 4.95         | 1.42         |
| <b>50022.00 L23</b> | <b>M-031251- KIAA1683</b>             | <b>80726.00</b> | <b>KIAA1683</b> | <b>2893.00</b> | <b>18.36</b> | <b>14.83</b> |
| 50022.00 M02        | M-006197- glutamate receptor,         | 2905.00         | GRIN2C          | 3055.00        | 2.62         | 0.91         |
| 50022.00 M04        | M-006189- glutamate receptor,         | 2897.00         | GRIK1           | 4250.00        | 3.51         | 0.02         |
| 50022.00 M05        | M-017270- growth arrest-specif        | 10634.00        | GAS2L1          | 3721.00        | 0.83         | 2.70         |
| 50022.00 M06        | M-008982- glutathione peroxid         | 2876.00         | GPX1            | 2870.00        | 1.53         | 2.00         |
| 50022.00 M07        | M-005280- YEATS domain conta          | 8089.00         | YEATS4          | 1651.00        | 0.97         | 2.56         |
| 50022.00 M08        | M-012272- G protein pathway s         | 2873.00         | GPS1            | 2819.00        | 2.23         | 1.30         |
| 50022.00 M09        | M-011492- growth arrest-specif        | 8522.00         | GAS7            | 3339.00        | 6.38         | 2.85         |
| 50022.00 M10        | M-005529- G protein-coupled r         | 57720.00        | GPR107          | 2610.00        | 1.95         | 1.58         |
| <b>50022.00 M11</b> | <b>M-021155- G protein-coupled r</b>  | <b>9737.00</b>  | <b>GPRASP1</b>  | <b>2605.00</b> | <b>8.29</b>  | <b>4.76</b>  |
| 50022.00 M12        | M-011868- glypican 3                  | 2719.00         | GPC3            | 2991.00        | 3.98         | 0.45         |
| 50022.00 M13        | M-008351- GATA binding protei         | 2627.00         | GATA6           | 3658.00        | 7.63         | 4.10         |
| <b>50022.00 M14</b> | <b>M-011522- glycosylphosphatidy</b>  | <b>8733.00</b>  | <b>GPAA1</b>    | <b>3631.00</b> | <b>7.22</b>  | <b>3.69</b>  |
| 50022.00 M15        | M-018076- opposite strand trar        | 352954.00       | GATS            | 3072.00        | 6.61         | 3.08         |
| 50022.00 M16        | M-019809- golgi autoantigen, g        | 2804.00         | GOLGB1          | 3539.00        | 2.29         | 1.24         |
| <b>50022.00 M17</b> | <b>M-011039- glucan (1,4-alpha-),</b> | <b>2632.00</b>  | <b>GBE1</b>     | <b>4536.00</b> | <b>6.72</b>  | <b>3.19</b>  |
| 50022.00 M18        | M-010633- golgi autoantigen, g        | 9950.00         | GOLGA5          | 4225.00        | 7.22         | 3.69         |
| 50022.00 M19        | M-011120- group-specific comp         | 2638.00         | GC              | 3118.00        | 3.14         | 0.39         |
| 50022.00 M20        | M-010074- glycine N-methyltra         | 27232.00        | GNMT            | 3304.00        | 4.66         | 1.13         |
| 50022.00 M21        | M-009212- glutamate-cysteine l        | 2729.00         | GCLC            | 2842.00        | 3.31         | 0.22         |
| 50022.00 M23        | M-012223- glucosidase I               | 7841.00         | GCS1            | 4466.00        | 2.02         | 1.51         |
| 50022.00 N02        | M-009227- ligase III, DNA, ATP-(      | 3980.00         | LIG3            | 3421.00        | 3.57         | 0.04         |
| 50022.00 N04        | M-008017- leukemia inhibitory         | 3977.00         | LIFR            | 4971.00        | 6.54         | 3.01         |
| 50022.00 N05        | M-025286- KIAA1856 protein            | 84629.00        | KIAA1856        | 4011.00        | 3.74         | 0.21         |
| 50022.00 N06        | M-012121- LIM homeobox 1              | 3975.00         | LHX1            | 4253.00        | 8.79         | 5.26         |
| 50022.00 N07        | M-016026- killer cell immunogl        | 115653.00       | KIR3DL3         | 3338.00        | 6.80         | 3.27         |
| 50022.00 N08        | M-012714- lipoma HMGIC fusio          | 10184.00        | LHFPL2          | 3244.00        | 2.53         | 1.00         |
| 50022.00 N09        | M-011300- KiSS-1 metastasis-su        | 3814.00         | KISS1           | 3567.00        | 5.75         | 2.22         |
| 50022.00 N10        | M-011982- leucine-rich, glioma        | 9211.00         | LGI1            | 2206.00        | 6.21         | 2.68         |
| 50022.00 N11        | M-019507- Kruppel-like factor 8       | 11279.00        | KLF8            | 2451.00        | 6.57         | 3.04         |
| 50022.00 N12        | M-011719- lectin, galactoside-b       | 3963.00         | LGALS7          | 2082.00        | 4.18         | 0.65         |
| 50022.00 N13        | M-004988- MLF1 interacting pr         | 79682.00        | MLF1IP          | 2336.00        | 3.42         | 0.11         |
| 50022.00 N14        | M-010606- lectin, galactoside-b       | 3958.00         | LGALS3          | 3580.00        | 4.19         | 0.66         |
| 50022.00 N15        | M-016300- killer cell lectin-like     | 10219.00        | KLRG1           | 4018.00        | 3.93         | 0.40         |
| 50022.00 N16        | M-025279- LFNG O-fucosylpept          | 3955.00         | LFNG            | 3844.00        | 3.10         | 0.43         |
| 50022.00 N17        | M-011307- karyopherin alpha 5         | 3841.00         | KPNA5           | 4511.00        | 9.24         | 5.71         |
| 50022.00 N18        | M-020301- leptin receptor over        | 23484.00        | LEPROTL1        | 4785.00        | 5.31         | 1.78         |
| <b>50022.00 N19</b> | <b>M-017318- RAN binding protein</b>  | <b>3843.00</b>  | <b>RANBP5</b>   | <b>4504.00</b> | <b>10.61</b> | <b>7.08</b>  |
| 50022.00 N20        | M-015164- leukocyte receptor c        | 114823.00       | LENG8           | 3435.00        | 1.51         | 2.02         |
| 50022.00 N21        | M-003846- kringle containing tr       | 83999.00        | KREMEN1         | 4090.00        | 8.75         | 5.22         |
| 50022.00 N23        | M-003847- kringle containing tr       | 79412.00        | KREMEN2         | 3035.00        | 5.01         | 1.48         |
| 50022.00 O02        | M-012490- granulysin                  | 10578.00        | GNLY            | 2551.00        | 2.74         | 0.79         |

|              |                                  |          |          |         |       |       |
|--------------|----------------------------------|----------|----------|---------|-------|-------|
| 50022.00 O04 | M-006876- guanine nucleotide l   | 10399.00 | GNB2L1   | 2248.00 | 2.40  | 1.13  |
| 50022.00 O05 | M-021225- ganglioside-induced    | 54332.00 | GDAP1    | 4139.00 | 8.14  | 4.61  |
| 50022.00 O06 | M-008681- guanine monphosph      | 8833.00  | GMPS     | 4539.00 | 11.52 | 7.99  |
| 50022.00 O07 | M-012041- growth factor, augm    | 2671.00  | GFER     | 6155.00 | 16.65 | 13.12 |
| 50022.00 O08 | M-003270- geminin, DNA replic    | 51053.00 | GMNN     | 4327.00 | 4.18  | 0.65  |
| 50022.00 O09 | M-020589- tumor necrosis fact    | 25816.00 | TNFAIP8  | 2956.00 | 6.66  | 3.13  |
| 50022.00 O10 | M-019639- GPI anchored molec     | 2765.00  | GML      | 2448.00 | 1.23  | 2.30  |
| 50022.00 O11 | M-011041- growth hormone 1       | 2688.00  | GH1      | 3139.00 | 3.22  | 0.31  |
| 50022.00 O12 | M-004032- glutamate dehydrog     | 2746.00  | GLUD1    | 3162.00 | 4.40  | 0.87  |
| 50022.00 O13 | M-016102- zinc finger protein 4  | 92283.00 | ZNF461   | 4040.00 | 1.63  | 1.90  |
| 50022.00 O14 | M-006464- glioma tumor suppr     | 29997.00 | GLTSCR2  | 2076.00 | 2.07  | 1.46  |
| 50022.00 O15 | M-020380- gap junction protein   | 57165.00 | GJA12    | 5847.00 | 14.06 | 10.53 |
| 50022.00 O16 | M-020751- glioma tumor suppr     | 29998.00 | GLTSCR1  | 3577.00 | 1.96  | 1.57  |
| 50022.00 O17 | M-015676- gap junction protein   | 2700.00  | GJA3     | 2510.00 | 4.22  | 0.69  |
| 50022.00 O18 | M-012634- glutaredoxin (thioltr  | 2745.00  | GLRX     | 1762.00 | 1.08  | 2.45  |
| 50022.00 O19 | M-017368- gap junction protein   | 2702.00  | GJA5     | 4306.00 | 3.81  | 0.28  |
| 50022.00 O20 | M-012277- glyoxalase I           | 2739.00  | GLO1     | 5099.00 | 5.63  | 2.10  |
| 50022.00 O21 | M-012698- gap junction protein   | 2703.00  | GJA8     | 3541.00 | 0.34  | 3.19  |
| 50022.00 O23 | M-019819- GLI pathogenesis-re    | 11010.00 | GLIPR1   | 2862.00 | 6.71  | 3.18  |
| 50022.00 P02 | M-010084- leukocyte receptor c   | 79143.00 | LENG4    | 3100.00 | 3.19  | 0.34  |
| 50022.00 P04 | M-014332- leukocyte receptor c   | 79165.00 | LENG1    | 3400.00 | 4.50  | 0.97  |
| 50022.00 P05 | M-012865- keratin 1 (epidermo    | 3848.00  | KRT1     | 2014.00 | 5.16  | 1.63  |
| 50022.00 P06 | M-012461- leucine zipper, dowr   | 23641.00 | LDOC1    | 2811.00 | 4.41  | 0.88  |
| 50022.00 P07 | M-017550- keratin 16 (focal nor  | 3868.00  | KRT16    | 1944.00 | 5.56  | 2.03  |
| 50022.00 P08 | M-008759- lactate dehydrogen     | 3948.00  | LDHC     | 2834.00 | 10.90 | 7.37  |
| 50022.00 P09 | M-010603- keratin 17             | 3872.00  | KRT17    | 2130.00 | 7.65  | 4.12  |
| 50022.00 P10 | M-009779- lactate dehydrogen     | 3945.00  | LDHB     | 3835.00 | 7.46  | 3.93  |
| 50022.00 P11 | M-010604- keratin 18             | 3875.00  | KRT18    | 2549.00 | 1.65  | 1.88  |
| 50022.00 P12 | M-008201- lactate dehydrogen     | 3939.00  | LDHA     | 2228.00 | 3.41  | 0.12  |
| 50022.00 P13 | M-011068- keratin 9 (epidermo    | 3857.00  | KRT9     | 2813.00 | 11.13 | 7.60  |
| 50022.00 P14 | M-028861- KIAA1147               | 57189.00 | KIAA1147 | 3830.00 | 4.60  | 1.07  |
| 50022.00 P15 | M-011313- keratin 81             | 3887.00  | KRT81    | 2030.00 | 2.17  | 1.36  |
| 50022.00 P16 | M-011715- lysosomal-associate    | 3920.00  | LAMP2    | 3521.00 | 5.34  | 1.81  |
| 50022.00 P17 | M-011316- keratin 86             | 3892.00  | KRT86    | 4123.00 | 4.83  | 1.30  |
| 50022.00 P18 | M-011712- laminin, alpha 4       | 3910.00  | LAMA4    | 3583.00 | 12.98 | 9.45  |
| 50022.00 P19 | M-010605- kinectin 1 (kinesin re | 3895.00  | KTN1     | 3627.00 | 5.05  | 1.52  |
| 50022.00 P20 | M-011070- laminin, alpha 2 (me   | 3908.00  | LAMA2    | 2538.00 | 3.47  | 0.06  |
| 50022.00 P21 | M-006418- leukocyte-associate    | 3903.00  | LAIR1    | 2648.00 | 6.19  | 2.66  |
| 50022.00 P23 | M-011318- leukocyte-associate    | 3904.00  | LAIR2    | 2146.00 | 9.97  | 6.44  |
|              |                                  |          | mdn      | 2990.50 | 3.53  | 1.81  |
|              |                                  |          | 3MAD     |         |       | 5.44  |
|              |                                  |          | MADc     |         |       | 2.68  |
|              | %                                | 3.13     |          |         |       |       |
| 50022.00 C22 |                                  |          |          | 3274.00 | 17.93 |       |
| 50022.00 D22 |                                  | 4689.00  | 25.61    | 2629.00 | 16.97 |       |
| 50022.00 E22 |                                  |          |          | 4476.00 | 12.76 |       |
| 50022.00 F22 |                                  |          |          |         |       |       |

50022.00 G22  
50022.00 H22  
50022.00 I22  
50022.00 J22

|           |         |       |
|-----------|---------|-------|
| mn        | 3459.67 | 15.88 |
| sd        | 937.39  | 2.75  |
|           | 1171.00 | 4.78  |
|           | 1410.00 | 2.70  |
|           | 1492.00 | 0.80  |
|           | 1805.00 | 2.99  |
| mn        | 1469.50 | 2.82  |
| sd        | 261.86  | 1.63  |
| 3psSD     |         | 8.25  |
| 3ngSD     |         | 4.89  |
| SumSD     |         | 13.14 |
| DiffMn    |         | 13.07 |
| SmovrDiff |         | 1.01  |
| 1minus    |         | -0.01 |

| rZ    | Cell Count | % inf | Abs Dev | rZ    | Cell Count | % inf | Abs Dev | rZ    |
|-------|------------|-------|---------|-------|------------|-------|---------|-------|
| -0.67 | 1183.00    | 0.34  | 3.19    | -1.24 | 2524.00    | 1.62  | 2.37    | -0.86 |
| -0.19 | 2060.00    | 1.89  | 1.64    | -0.64 | 3271.00    | 4.89  | 0.90    | 0.33  |
| -0.85 | 2590.00    | 1.58  | 1.95    | -0.76 | 2735.00    | 0.95  | 3.04    | -1.10 |
| -0.37 | 3044.00    | 2.27  | 1.26    | -0.49 | 4870.00    | 6.57  | 2.58    | 0.94  |
| -1.10 | 3079.00    | 0.55  | 2.98    | -1.16 | 2560.00    | 1.76  | 2.23    | -0.81 |
| -0.44 | 3086.00    | 3.50  | 0.03    | -0.01 | 2557.00    | 3.32  | 0.67    | -0.24 |
| -0.09 | 838.00     | 3.34  | 0.19    | -0.07 | 2004.00    | 1.45  | 2.54    | -0.92 |
| -0.69 | 1718.00    | 2.62  | 0.91    | -0.35 | 2726.00    | 1.47  | 2.52    | -0.91 |
| -0.04 | 1651.00    | 6.84  | 3.31    | 1.29  | 1773.00    | 2.54  | 1.45    | -0.52 |
| 0.29  | 2956.00    | 4.74  | 1.21    | 0.47  | 2799.00    | 2.61  | 1.38    | -0.50 |
| -0.84 | 1557.00    | 2.18  | 1.35    | -0.52 | 1787.00    | 1.06  | 2.93    | -1.06 |
| -0.76 | 669.00     | 2.99  | 0.54    | -0.21 | 1677.00    | 4.29  | 0.30    | 0.11  |
| 0.85  | 1850.00    | 12.49 | 8.96    | 3.49  | 2309.00    | 9.18  | 5.19    | 1.88  |
| -0.75 | 1691.00    | 1.72  | 1.82    | -0.71 | 2268.00    | 2.16  | 1.83    | -0.66 |
| 0.43  | 2819.00    | 3.37  | 0.16    | -0.06 | 2862.00    | 4.05  | 0.06    | 0.02  |
| 0.05  | 5423.00    | 8.21  | 4.68    | 1.82  | 4929.00    | 6.94  | 2.95    | 1.07  |
| -0.21 | 2392.00    | 3.14  | 0.39    | -0.15 | 4199.00    | 1.88  | 2.11    | -0.76 |
| -0.13 | 4370.00    | 10.76 | 7.23    | 2.82  | 3654.00    | 5.56  | 1.57    | 0.57  |
| 0.87  | 2735.00    | 6.11  | 2.58    | 1.01  | 3499.00    | 4.06  | 0.07    | 0.03  |
| -0.84 | 2034.00    | 6.93  | 3.40    | 1.33  | 2793.00    | 1.72  | 2.27    | -0.82 |
| 0.48  | 2793.00    | 4.19  | 0.66    | 0.26  | 2346.00    | 5.24  | 1.25    | 0.46  |
| -0.23 | 2735.00    | 3.33  | 0.20    | -0.08 | 3216.00    | 6.84  | 2.85    | 1.03  |
| 0.92  | 3038.00    | 0.86  | 2.67    | -1.04 | 3689.00    | 2.44  | 1.55    | -0.56 |
| -0.74 | 3914.00    | 1.43  | 2.10    | -0.82 | 3498.00    | 4.95  | 0.96    | 0.35  |
| -0.68 | 4662.00    | 2.57  | 0.96    | -0.37 | 4102.00    | 7.83  | 3.84    | 1.39  |
| -0.44 | 3823.00    | 2.17  | 1.36    | -0.53 | 2630.00    | 2.13  | 1.86    | -0.67 |
| 0.17  | 2257.00    | 2.39  | 1.14    | -0.44 | 1350.00    | 3.56  | 0.43    | -0.16 |
| -1.10 | 3613.00    | 2.49  | 1.04    | -0.40 | 1920.00    | 1.88  | 2.12    | -0.76 |
| 0.33  | 3886.00    | 3.04  | 0.49    | -0.19 | 2468.00    | 2.80  | 1.19    | -0.43 |
| -0.65 | 3087.00    | 2.46  | 1.07    | -0.41 | 3187.00    | 2.48  | 1.51    | -0.55 |
| -0.87 | 2068.00    | 1.74  | 1.79    | -0.70 | 3652.00    | 5.18  | 1.19    | 0.43  |
| 0.18  | 1285.00    | 5.60  | 2.07    | 0.81  | 1666.00    | 7.14  | 3.15    | 1.14  |
| -0.82 | 2908.00    | 2.37  | 1.16    | -0.45 | 3528.00    | 5.81  | 1.82    | 0.66  |
| -1.21 | 3100.00    | 0.16  | 3.37    | -1.31 | 2951.00    | 2.54  | 1.45    | -0.52 |
| -0.78 | 2891.00    | 3.94  | 0.41    | 0.16  | 2642.00    | 2.65  | 1.34    | -0.48 |
| -1.00 | 3425.00    | 1.14  | 2.39    | -0.93 | 3136.00    | 0.86  | 3.13    | -1.13 |
| -0.72 | 2252.00    | 2.40  | 1.13    | -0.44 | 3531.00    | 3.65  | 0.34    | -0.12 |
| -0.69 | 2499.00    | 6.36  | 2.83    | 1.11  | 3069.00    | 3.98  | 0.01    | 0.00  |
| 0.42  | 2318.00    | 3.32  | 0.21    | -0.08 | 3349.00    | 3.37  | 0.62    | -0.22 |
| -0.43 | 5228.00    | 8.89  | 5.36    | 2.09  | 5380.00    | 5.95  | 1.96    | 0.71  |
| -0.80 | 3354.00    | 1.58  | 1.95    | -0.76 | 3694.00    | 1.73  | 2.26    | -0.82 |
| 0.11  | 4590.00    | 9.65  | 6.12    | 2.39  | 2919.00    | 5.62  | 1.63    | 0.59  |
| -0.85 | 5358.00    | 2.00  | 1.53    | -0.60 | 2801.00    | 1.71  | 2.28    | -0.82 |
| -1.22 | 3726.00    | 0.27  | 3.26    | -1.27 | 3549.00    | 1.13  | 2.86    | -1.04 |
| -0.56 | 3791.00    | 1.87  | 1.66    | -0.64 | 2138.00    | 3.23  | 0.76    | -0.27 |
| -0.79 | 4681.00    | 2.24  | 1.29    | -0.50 | 1911.00    | 0.21  | 3.78    | -1.37 |

|       |         |       |      |       |         |       |      |       |
|-------|---------|-------|------|-------|---------|-------|------|-------|
| 0.46  | 2912.00 | 3.91  | 0.38 | 0.15  | 2163.00 | 5.55  | 1.56 | 0.57  |
| -0.63 | 1903.00 | 2.21  | 1.32 | -0.51 | 1044.00 | 1.05  | 2.94 | -1.06 |
| -0.62 | 2854.00 | 1.26  | 2.27 | -0.88 | 2184.00 | 2.29  | 1.70 | -0.61 |
| -0.73 | 1998.00 | 1.80  | 1.73 | -0.67 | 2451.00 | 1.35  | 2.64 | -0.96 |
| -0.13 | 3137.00 | 2.49  | 1.04 | -0.41 | 2611.00 | 6.09  | 2.10 | 0.76  |
| -0.63 | 2581.00 | 4.92  | 1.39 | 0.54  | 2766.00 | 1.99  | 2.00 | -0.72 |
| -0.20 | 3511.00 | 2.22  | 1.31 | -0.51 | 2633.00 | 1.63  | 2.36 | -0.85 |
| 1.14  | 2314.00 | 3.93  | 0.40 | 0.16  | 1617.00 | 4.64  | 0.65 | 0.24  |
| 1.37  | 2954.00 | 3.22  | 0.31 | -0.12 | 390.00  | 1.54  | 2.45 | -0.89 |
| 0.00  | 2953.00 | 1.35  | 2.18 | -0.85 | 2927.00 | 1.54  | 2.45 | -0.89 |
| 0.83  | 4124.00 | 3.64  | 0.11 | 0.04  | 3179.00 | 2.80  | 1.19 | -0.43 |
| 0.26  | 3955.00 | 1.16  | 2.37 | -0.92 | 4847.00 | 4.62  | 0.63 | 0.23  |
| -0.85 | 3032.00 | 1.72  | 1.82 | -0.71 | 4159.00 | 6.18  | 2.19 | 0.79  |
| 0.90  | 2209.00 | 10.96 | 7.43 | 2.89  | 2847.00 | 4.36  | 0.37 | 0.13  |
| 0.10  | 2773.00 | 1.41  | 2.12 | -0.83 | 3437.00 | 6.92  | 2.93 | 1.06  |
| -0.28 | 4106.00 | 1.75  | 1.78 | -0.69 | 4196.00 | 2.84  | 1.15 | -0.42 |
| 0.05  | 4832.00 | 1.86  | 1.67 | -0.65 | 4040.00 | 7.08  | 3.09 | 1.12  |
| 0.26  | 4264.00 | 4.17  | 0.64 | 0.25  | 4434.00 | 13.35 | 9.36 | 3.39  |
| 0.20  | 4052.00 | 2.05  | 1.48 | -0.58 | 3375.00 | 3.47  | 0.52 | -0.19 |
| -0.36 | 3440.00 | 1.37  | 2.16 | -0.84 | 2197.00 | 3.28  | 0.71 | -0.26 |
| -0.44 | 2942.00 | 1.77  | 1.76 | -0.69 | 2792.00 | 4.84  | 0.85 | 0.31  |
| -0.40 | 3746.00 | 0.45  | 3.08 | -1.20 | 1792.00 | 2.96  | 1.03 | -0.37 |
| -0.23 | 3611.00 | 1.44  | 2.09 | -0.81 | 2216.00 | 2.57  | 1.42 | -0.51 |
| 0.39  | 2938.00 | 1.74  | 1.79 | -0.70 | 2745.00 | 4.52  | 0.53 | 0.19  |
| 1.68  | 3610.00 | 3.99  | 0.46 | 0.18  | 3122.00 | 13.65 | 9.66 | 3.50  |
| -0.90 | 2804.00 | 0.50  | 3.03 | -1.18 | 2175.00 | 2.25  | 1.74 | -0.63 |
| 0.30  | 4402.00 | 1.00  | 2.53 | -0.98 | 3069.00 | 3.65  | 0.34 | -0.12 |
| 0.14  | 3917.00 | 1.63  | 1.90 | -0.74 | 2196.00 | 2.09  | 1.90 | -0.68 |
| 0.66  | 3909.00 | 3.02  | 0.51 | -0.20 | 3629.00 | 5.48  | 1.49 | 0.54  |
| 0.71  | 1741.00 | 1.32  | 2.21 | -0.86 | 1192.00 | 5.20  | 1.21 | 0.44  |
| 0.80  | 4649.00 | 1.03  | 2.50 | -0.97 | 3429.00 | 4.61  | 0.62 | 0.23  |
| 0.24  | 2614.00 | 1.45  | 2.08 | -0.81 | 3198.00 | 6.79  | 2.80 | 1.01  |
| 1.48  | 3262.00 | 2.12  | 1.41 | -0.55 | 3482.00 | 6.43  | 2.44 | 0.89  |
| -0.27 | 3446.00 | 1.57  | 1.96 | -0.76 | 3983.00 | 3.19  | 0.80 | -0.29 |
| -0.97 | 4272.00 | 3.53  | 0.00 | 0.00  | 6048.00 | 10.14 | 6.15 | 2.23  |
| -1.19 | 2472.00 | 0.08  | 3.45 | -1.34 | 1418.00 | 0.85  | 3.14 | -1.14 |
| -1.02 | 5641.00 | 2.93  | 0.61 | -0.23 | 3478.00 | 5.18  | 1.19 | 0.43  |
| -1.11 | 3875.00 | 1.42  | 2.11 | -0.82 | 2922.00 | 2.53  | 1.46 | -0.53 |
| -0.76 | 3331.00 | 1.59  | 1.94 | -0.75 | 2201.00 | 1.86  | 2.13 | -0.77 |
| -0.97 | 4702.00 | 3.89  | 0.36 | 0.14  | 2853.00 | 3.86  | 0.13 | -0.05 |
| -0.89 | 2808.00 | 1.14  | 2.39 | -0.93 | 1458.00 | 2.13  | 1.86 | -0.67 |
| -0.80 | 2944.00 | 1.73  | 1.80 | -0.70 | 2232.00 | 5.15  | 1.16 | 0.42  |
| -0.99 | 3737.00 | 3.21  | 0.32 | -0.12 | 2502.00 | 3.48  | 0.51 | -0.18 |
| -1.21 | 1889.00 | 0.42  | 3.11 | -1.21 | 1728.00 | 2.84  | 1.15 | -0.42 |
| -0.91 | 1413.00 | 0.85  | 2.68 | -1.04 | 1352.00 | 2.07  | 1.92 | -0.69 |
| -0.80 | 1067.00 | 3.28  | 0.25 | -0.10 | 655.00  | 1.22  | 2.77 | -1.00 |
| -0.95 | 3843.00 | 2.21  | 1.32 | -0.51 | 2685.00 | 2.12  | 1.87 | -0.67 |



|       |         |       |       |       |         |       |       |         |
|-------|---------|-------|-------|-------|---------|-------|-------|---------|
| -0.80 | 4083.00 | 0.96  | 2.57  | -1.00 | 3341.00 | 3.41  | 0.58  | -0.21   |
| -0.37 | 4293.00 | 3.52  | 0.01  | 0.00  | 3701.00 | 9.40  | 5.41  | 1.96    |
| -0.73 | 3111.00 | 4.02  | 0.49  | 0.19  | 1883.00 | 3.98  | 0.01  | 0.00    |
| -0.88 | 1891.00 | 0.32  | 3.21  | -1.25 | 1080.00 | 0.28  | 3.71  | -1.34   |
| -0.66 | 3501.00 | 2.09  | 1.44  | -0.56 | 3131.00 | 5.05  | 1.06  | 0.38    |
| -1.09 | 3811.00 | 1.50  | 2.03  | -0.79 | 3485.00 | 3.99  | 0.00  | 0.00    |
| -0.68 | 3745.00 | 1.74  | 1.79  | -0.70 | 4258.00 | 4.58  | 0.59  | 0.22    |
| -1.13 | 2268.00 | 3.48  | 0.05  | -0.02 | 2726.00 | 2.38  | 1.61  | -0.58   |
| -0.67 | 2942.00 | 3.13  | 0.40  | -0.16 | 3129.00 | 3.13  | 0.86  | -0.31   |
| 0.00  | 3851.00 | 4.15  | 0.62  | 0.24  | 4272.00 | 4.99  | 1.00  | 0.36    |
| -0.18 | 1671.00 | 6.22  | 2.69  | 1.05  | 1711.00 | 7.60  | 3.61  | 1.31    |
| -0.58 | 2169.00 | 4.24  | 0.71  | 0.28  | 2757.00 | 3.23  | 0.76  | -0.27   |
| -0.61 | 3092.00 | 2.23  | 1.30  | -0.50 | 3777.00 | 4.95  | 0.96  | 0.35    |
| 1.12  | 3714.00 | 7.51  | 3.98  | 1.55  | 3877.00 | 4.44  | 0.45  | 0.16    |
| -0.53 | 2752.00 | 3.27  | 0.26  | -0.10 | 1914.00 | 1.20  | 2.79  | -1.01   |
| -0.97 | 2925.00 | 3.11  | 0.42  | -0.16 | 2320.00 | 1.34  | 2.65  | -0.96   |
| -1.09 | 3262.00 | 5.92  | 2.39  | 0.93  | 1947.00 | 2.00  | 1.99  | -0.72   |
| -0.96 | 2332.00 | 1.29  | 2.24  | -0.87 | 2012.00 | 0.50  | 3.49  | -1.26   |
| -0.33 | 2375.00 | 3.16  | 0.37  | -0.14 | 2050.00 | 5.37  | 1.38  | 0.50    |
| 0.25  | 3362.00 | 2.08  | 1.45  | -0.56 | 2526.00 | 1.62  | 2.37  | -0.86   |
| -0.99 | 3120.00 | 2.76  | 0.77  | -0.30 | 1914.00 | 0.37  | 3.62  | -1.31   |
| -0.83 | 4678.00 | 4.55  | 1.02  | 0.40  | 4122.00 | 4.66  | 0.67  | 0.24    |
| -0.89 | 3096.00 | 3.13  | 0.40  | -0.15 | 1906.00 | 1.10  | 2.89  | -1.04   |
| -0.55 | 4235.00 | 7.41  | 3.88  | 1.51  | 4066.00 | 1.75  | 2.24  | -0.81   |
| -0.02 | 4198.00 | 6.19  | 2.66  | 1.04  | 2240.00 | 1.65  | 2.34  | -0.85   |
| 1.20  | 4325.00 | 5.29  | 1.76  | 0.69  | 4344.00 | 3.04  | 0.95  | -0.34   |
| -0.55 | 3046.00 | 2.33  | 1.20  | -0.47 | 4403.00 | 2.66  | 1.33  | -0.48   |
| 0.20  | 4015.00 | 1.49  | 2.04  | -0.79 | 4352.00 | 0.90  | 3.09  | -1.12   |
| 1.28  | 4704.00 | 3.89  | 0.36  | 0.14  | 3334.00 | 3.30  | 0.69  | -0.25   |
| -0.24 | 3932.00 | 1.78  | 1.75  | -0.68 | 3143.00 | 2.48  | 1.51  | -0.54   |
| 6.19  | 2364.00 | 9.01  | 5.48  | 2.14  | 3075.00 | 14.18 | 10.19 | 3.69 y  |
| 0.65  | 3488.00 | 5.48  | 1.95  | 0.76  | 2013.00 | 3.18  | 0.81  | -0.29   |
| -0.05 | 4353.00 | 3.26  | 0.27  | -0.10 | 3121.00 | 2.85  | 1.14  | -0.41   |
| -0.92 | 1821.00 | 2.42  | 1.11  | -0.43 | 2077.00 | 2.26  | 1.73  | -0.62   |
| 2.35  | 2267.00 | 4.19  | 0.66  | 0.26  | 2095.00 | 2.53  | 1.46  | -0.53   |
| 0.13  | 2286.00 | 2.10  | 1.43  | -0.56 | 2506.00 | 3.19  | 0.80  | -0.29   |
| 2.77  | 2132.00 | 8.68  | 5.15  | 2.01  | 1173.00 | 3.32  | 0.67  | -0.24 x |
| 0.60  | 2782.00 | 7.66  | 4.13  | 1.61  | 2190.00 | 7.81  | 3.82  | 1.38    |
| 0.59  | 3957.00 | 5.84  | 2.31  | 0.90  | 3048.00 | 5.68  | 1.69  | 0.61    |
| 1.00  | 3666.00 | 2.73  | 0.80  | -0.31 | 3441.00 | 2.94  | 1.05  | -0.38   |
| 1.19  | 5103.00 | 11.86 | 8.33  | 3.25  | 3946.00 | 6.21  | 2.22  | 0.81    |
| 3.94  | 3404.00 | 14.16 | 10.63 | 4.14  | 2869.00 | 10.56 | 6.57  | 2.38 y  |
| 3.43  | 4615.00 | 16.32 | 12.79 | 4.98  | 3430.00 | 11.55 | 7.56  | 2.74 y  |
| 1.95  | 5457.00 | 12.99 | 9.46  | 3.69  | 3235.00 | 4.98  | 0.99  | 0.36    |
| 3.24  | 2950.00 | 10.41 | 6.88  | 2.68  | 2951.00 | 3.86  | 0.13  | -0.04 y |
| 1.76  | 2697.00 | 7.64  | 4.11  | 1.60  | 3174.00 | 3.72  | 0.27  | -0.10   |
| -0.41 | 4165.00 | 4.75  | 1.22  | 0.48  | 3999.00 | 3.95  | 0.04  | -0.01   |



|             |                |              |             |             |                |              |              |               |
|-------------|----------------|--------------|-------------|-------------|----------------|--------------|--------------|---------------|
| -0.34       | 3930.00        | 4.02         | 0.49        | 0.19        | 3442.00        | 3.20         | 0.79         | -0.29         |
| 1.09        | 2167.00        | 4.52         | 0.99        | 0.39        | 2822.00        | 8.50         | 4.51         | 1.64          |
| 0.12        | 3479.00        | 4.40         | 0.87        | 0.34        | 4480.00        | 6.81         | 2.82         | 1.02          |
| 0.63        | 3226.00        | 2.67         | 0.86        | -0.34       | 2731.00        | 3.30         | 0.69         | -0.25         |
| -0.23       | 3151.00        | 2.51         | 1.02        | -0.40       | 2597.00        | 5.62         | 1.63         | 0.59          |
| <b>3.94</b> | <b>3715.00</b> | <b>12.81</b> | <b>9.28</b> | <b>3.62</b> | <b>3119.00</b> | <b>12.99</b> | <b>9.00</b>  | <b>3.26</b> y |
| -0.31       | 3617.00        | 4.37         | 0.84        | 0.33        | 3474.00        | 9.30         | 5.31         | 1.92          |
| -0.81       | 2406.00        | 1.16         | 2.37        | -0.92       | 2178.00        | 2.20         | 1.79         | -0.65         |
| 0.19        | 4664.00        | 4.61         | 1.08        | 0.42        | 3214.00        | 7.25         | 3.26         | 1.18          |
| -0.05       | 1412.00        | 0.42         | 3.11        | -1.21       | 1679.00        | 3.10         | 0.89         | -0.32         |
| -0.40       | 1571.00        | 4.01         | 0.48        | 0.19        | 1595.00        | 1.82         | 2.17         | -0.79         |
| 1.13        | 4679.00        | 4.45         | 0.92        | 0.36        | 3989.00        | 10.45        | <b>6.46</b>  | <b>2.34</b>   |
| 0.07        | 1885.00        | 2.23         | 1.30        | -0.51       | 1804.00        | 2.88         | 1.11         | -0.40         |
| <b>2.05</b> | <b>3875.00</b> | <b>5.68</b>  | <b>2.15</b> | <b>0.84</b> | <b>3318.00</b> | <b>6.54</b>  | <b>2.55</b>  | <b>0.93</b>   |
| 0.30        | 3694.00        | 3.41         | 0.12        | -0.04       | 3680.00        | 8.94         | 4.95         | 1.79          |
| 0.42        | 2545.00        | 2.51         | 1.02        | -0.39       | 2847.00        | 6.15         | 2.16         | 0.78          |
| <b>3.55</b> | <b>5577.00</b> | <b>7.84</b>  | <b>4.31</b> | <b>1.68</b> | <b>3530.00</b> | <b>12.01</b> | <b>8.02</b>  | <b>2.91</b> y |
| 1.49        | 3509.00        | 7.01         | 3.48        | 1.36        | 2756.00        | 7.58         | 3.59         | 1.30          |
| <b>2.36</b> | <b>3343.00</b> | <b>3.77</b>  | <b>0.24</b> | <b>0.09</b> | <b>4017.00</b> | <b>7.37</b>  | <b>3.38</b>  | <b>1.23</b>   |
| 0.67        | 6777.00        | 8.06         | 4.53        | 1.77        | 5876.00        | 15.81        | <b>11.82</b> | <b>4.28</b>   |
| -0.05       | 5061.00        | 3.91         | 0.38        | 0.15        | 4401.00        | 1.80         | 2.20         | -0.79         |
| 0.72        | 3192.00        | 3.10         | 0.43        | -0.17       | 3735.00        | 6.16         | 2.17         | 0.79          |
| -0.42       | 3120.00        | 6.70         | 3.17        | 1.24        | 2277.00        | 4.61         | 0.62         | 0.23          |
| 0.99        | 3595.00        | 5.51         | 1.98        | 0.77        | 3972.00        | 6.14         | 2.15         | 0.78          |
| -0.38       | 2866.00        | 4.78         | 1.25        | 0.49        | 2221.00        | 2.93         | 1.06         | -0.38         |
| -0.46       | 3153.00        | 5.77         | 2.24        | 0.88        | 2916.00        | 2.98         | 1.01         | -0.36         |
| 0.53        | 4428.00        | 12.04        | <b>8.51</b> | <b>3.32</b> | 4460.00        | 9.01         | 5.02         | 1.82          |
| -0.33       | 2930.00        | 4.20         | 0.67        | 0.26        | 3324.00        | 2.29         | 1.70         | -0.62         |
| -0.61       | 3309.00        | 3.14         | 0.39        | -0.15       | 2308.00        | 4.51         | 0.52         | 0.19          |
| -0.48       | 2367.00        | 3.68         | 0.15        | 0.06        | 1703.00        | 1.12         | 2.87         | -1.04         |
| -0.72       | 2899.00        | 2.21         | 1.32        | -0.51       | 1761.00        | 2.33         | 1.66         | -0.60         |
| -0.77       | 3188.00        | 2.73         | 0.80        | -0.31       | 3328.00        | 3.40         | 0.59         | -0.21         |
| 1.40        | 2321.00        | 8.40         | 4.87        | 1.90        | 2589.00        | 7.84         | 3.85         | 1.40          |
| -0.29       | 3589.00        | 1.73         | 1.80        | -0.70       | 2900.00        | 1.38         | 2.61         | -0.94         |
| -0.65       | 3747.00        | 3.98         | 0.45        | 0.18        | 3503.00        | 5.45         | 1.46         | 0.53          |
| 0.50        | 4161.00        | 3.10         | 0.43        | -0.17       | 2268.00        | 3.88         | 0.11         | -0.04         |
| -0.78       | 3869.00        | 1.55         | 1.98        | -0.77       | 3378.00        | 2.04         | 1.95         | -0.70         |
| -0.83       | 5235.00        | 4.41         | 0.88        | 0.35        | 5039.00        | 4.90         | 0.91         | 0.33          |
| -0.16       | 3648.00        | 4.30         | 0.77        | 0.30        | 3278.00        | 6.41         | 2.42         | 0.88          |
| -0.99       | 3626.00        | 1.93         | 1.60        | -0.62       | 3856.00        | 2.13         | 1.86         | -0.67         |
| -0.27       | 2487.00        | 0.80         | 2.73        | -1.06       | 3815.00        | 5.58         | 1.59         | 0.58          |
| -0.12       | 3419.00        | 2.84         | 0.69        | -0.27       | 2398.00        | 6.01         | 2.02         | 0.73          |
| -0.05       | 2744.00        | 3.28         | 0.25        | -0.10       | 3658.00        | 6.21         | 2.22         | 0.80          |
| <b>2.99</b> | <b>2638.00</b> | <b>4.93</b>  | <b>1.40</b> | <b>0.55</b> | <b>3542.00</b> | <b>16.94</b> | <b>12.95</b> | <b>4.69</b> y |
| 0.81        | 2734.00        | 7.72         | 4.19        | 1.63        | 2074.00        | 10.27        | <b>6.28</b>  | <b>2.28</b>   |
| 0.12        | 2002.00        | 5.09         | 1.56        | 0.61        | 1719.00        | 2.04         | 1.95         | -0.71         |
| -0.20       | 3978.00        | 4.52         | 0.99        | 0.39        | 4654.00        | 5.26         | 1.27         | 0.46          |

|       |         |       |       |       |         |       |       |         |
|-------|---------|-------|-------|-------|---------|-------|-------|---------|
| -0.79 | 1378.00 | 2.83  | 0.70  | -0.27 | 864.00  | 6.13  | 2.14  | 0.78    |
| 1.10  | 1546.00 | 3.43  | 0.10  | -0.04 | 2425.00 | 7.13  | 3.14  | 1.14    |
| 0.67  | 1178.00 | 2.29  | 1.24  | -0.48 | 2098.00 | 7.44  | 3.45  | 1.25    |
| -0.09 | 2114.00 | 0.61  | 2.92  | -1.13 | 2955.00 | 4.87  | 0.88  | 0.32    |
| 0.33  | 2682.00 | 3.62  | 0.09  | 0.04  | 3602.00 | 2.83  | 1.16  | -0.42   |
| 0.23  | 2336.00 | 5.61  | 2.08  | 0.81  | 4126.00 | 10.47 | 6.48  | 2.35    |
| 0.57  | 2619.00 | 2.94  | 0.59  | -0.23 | 3004.00 | 6.06  | 2.07  | 0.75    |
| 0.39  | 3095.00 | 2.68  | 0.85  | -0.33 | 3928.00 | 4.25  | 0.26  | 0.10    |
| -0.31 | 1988.00 | 3.42  | 0.11  | -0.04 | 3186.00 | 4.27  | 0.28  | 0.10    |
| 3.72  | 2779.00 | 20.37 | 16.84 | 6.56  | 4290.00 | 21.33 | 17.34 | 6.28 y  |
| 1.19  | 1607.00 | 7.59  | 4.06  | 1.58  | 2190.00 | 5.25  | 1.26  | 0.46    |
| 0.31  | 2885.00 | 2.77  | 0.76  | -0.29 | 4558.00 | 7.33  | 3.34  | 1.21    |
| 0.78  | 3838.00 | 5.89  | 2.36  | 0.92  | 5227.00 | 9.72  | 5.73  | 2.08    |
| -0.06 | 1937.00 | 6.81  | 3.28  | 1.28  | 1759.00 | 1.02  | 2.97  | -1.07   |
| -0.48 | 2636.00 | 4.59  | 1.06  | 0.41  | 3332.00 | 2.19  | 1.80  | -0.65   |
| 2.90  | 3131.00 | 6.26  | 2.73  | 1.07  | 4271.00 | 9.06  | 5.07  | 1.84    |
| 0.83  | 4677.00 | 3.04  | 0.49  | -0.19 | 3490.00 | 2.58  | 1.41  | -0.51   |
| -0.86 | 1535.00 | 3.84  | 0.31  | 0.12  | 1843.00 | 2.17  | 1.82  | -0.66   |
| -0.24 | 2762.00 | 4.96  | 1.43  | 0.56  | 2460.00 | 4.88  | 0.89  | 0.32    |
| -0.73 | 1575.00 | 1.33  | 2.20  | -0.85 | 1454.00 | 0.76  | 3.23  | -1.17   |
| 2.66  | 1296.00 | 11.96 | 8.43  | 3.29  | 1269.00 | 10.32 | 6.33  | 2.30 x  |
| 0.45  | 1901.00 | 5.94  | 2.41  | 0.94  | 1236.00 | 5.83  | 1.84  | 0.67    |
| -0.49 | 1578.00 | 2.53  | 1.00  | -0.39 | 1261.00 | 0.71  | 3.28  | -1.19   |
| 1.10  | 2631.00 | 5.44  | 1.91  | 0.74  | 1773.00 | 8.74  | 4.75  | 1.72    |
| 2.44  | 2905.00 | 3.86  | 0.33  | 0.13  | 2672.00 | 2.77  | 1.22  | -0.44   |
| 2.09  | 2711.00 | 9.78  | 6.25  | 2.43  | 1484.00 | 2.36  | 1.63  | -0.59 y |
| -0.10 | 2649.00 | 3.06  | 0.47  | -0.18 | 3147.00 | 4.42  | 0.43  | 0.16    |
| 0.97  | 1803.00 | 5.49  | 1.96  | 0.77  | 2387.00 | 4.11  | 0.12  | 0.04    |
| -0.69 | 2003.00 | 3.05  | 0.48  | -0.19 | 2013.00 | 1.34  | 2.65  | -0.96   |
| 3.47  | 3603.00 | 7.47  | 3.94  | 1.54  | 4826.00 | 14.28 | 10.29 | 3.73 y  |
| 1.42  | 2970.00 | 7.34  | 3.81  | 1.49  | 3365.00 | 7.19  | 3.20  | 1.16    |
| 0.72  | 3156.00 | 4.18  | 0.65  | 0.26  | 277.00  | 1.44  | 2.55  | -0.92   |
| 2.16  | 3217.00 | 9.54  | 6.01  | 2.34  | 3709.00 | 5.23  | 1.24  | 0.45 y  |
| 0.66  | 3031.00 | 4.72  | 1.19  | 0.46  | 3707.00 | 12.19 | 8.20  | 2.97    |
| -0.67 | 946.00  | 0.11  | 3.42  | -1.33 | 1045.00 | 1.91  | 2.08  | -0.75   |
| 0.41  | 3118.00 | 5.64  | 2.11  | 0.83  | 3843.00 | 4.61  | 0.62  | 0.22    |
| -0.55 | 2508.00 | 0.44  | 3.09  | -1.20 | 2172.00 | 3.55  | 0.44  | -0.16   |
| -0.69 | 3406.00 | 2.29  | 1.24  | -0.48 | 3719.00 | 2.88  | 1.11  | -0.40   |
| 1.26  | 3139.00 | 8.06  | 4.53  | 1.77  | 3080.00 | 12.18 | 8.19  | 2.97    |
| -0.85 | 2266.00 | 2.82  | 0.71  | -0.27 | 2654.00 | 3.13  | 0.86  | -0.31   |
| 0.10  | 2035.00 | 5.36  | 1.83  | 0.71  | 2193.00 | 4.88  | 0.89  | 0.32    |
| 0.41  | 2914.00 | 2.33  | 1.20  | -0.46 | 3941.00 | 3.35  | 0.64  | -0.23   |
| 1.26  | 2390.00 | 8.79  | 5.26  | 2.05  | 1861.00 | 5.53  | 1.54  | 0.56    |
| 0.72  | 2163.00 | 2.77  | 0.76  | -0.29 | 1878.00 | 5.96  | 1.97  | 0.72    |
| 1.20  | 2916.00 | 5.59  | 2.06  | 0.80  | 2998.00 | 5.30  | 1.31  | 0.48    |
| 2.83  | 3497.00 | 4.06  | 0.53  | 0.21  | 4262.00 | 7.09  | 3.10  | 1.12    |
| -0.49 | 1794.00 | 1.28  | 2.25  | -0.87 | 1766.00 | 0.91  | 3.08  | -1.12   |

|       |         |       |       |       |         |       |       |        |
|-------|---------|-------|-------|-------|---------|-------|-------|--------|
| 1.84  | 3103.00 | 5.16  | 1.63  | 0.64  | 4158.00 | 5.82  | 1.83  | 0.66   |
| -0.62 | 2490.00 | 2.57  | 0.96  | -0.37 | 3061.00 | 2.19  | 1.80  | -0.65  |
| 0.43  | 3212.00 | 1.12  | 2.41  | -0.94 | 4033.00 | 2.48  | 1.51  | -0.55  |
| 0.35  | 2207.00 | 1.45  | 2.08  | -0.81 | 2131.00 | 2.39  | 1.60  | -0.58  |
| 0.53  | 2361.00 | 2.63  | 0.90  | -0.35 | 3092.00 | 1.42  | 2.57  | -0.93  |
| 5.53  | 3190.00 | 11.03 | 7.50  | 2.93  | 2640.00 | 9.36  | 5.37  | 1.95 y |
| -0.34 | 3632.00 | 3.19  | 0.34  | -0.13 | 3359.00 | 2.80  | 1.19  | -0.43  |
| -0.01 | 4093.00 | 7.11  | 3.58  | 1.40  | 5467.00 | 7.94  | 3.95  | 1.43   |
| -1.00 | 3631.00 | 6.69  | 3.16  | 1.23  | 4761.00 | 5.25  | 1.26  | 0.46   |
| -0.74 | 1920.00 | 3.13  | 0.41  | -0.16 | 2961.00 | 2.40  | 1.59  | -0.58  |
| -0.95 | 1340.00 | 2.09  | 1.44  | -0.56 | 2291.00 | 1.22  | 2.77  | -1.00  |
| -0.48 | 2894.00 | 9.54  | 6.01  | 2.34  | 3684.00 | 2.61  | 1.38  | -0.50  |
| 1.06  | 2973.00 | 7.50  | 3.97  | 1.55  | 5169.00 | 9.15  | 5.16  | 1.87   |
| -0.59 | 2741.00 | 3.54  | 0.01  | 0.01  | 3806.00 | 3.21  | 0.78  | -0.28  |
| 1.78  | 2227.00 | 14.41 | 10.88 | 4.24  | 3031.00 | 11.84 | 7.85  | 2.85 y |
| 0.17  | 3549.00 | 8.62  | 5.09  | 1.99  | 3954.00 | 4.10  | 0.11  | 0.04   |
| 1.53  | 3414.00 | 8.93  | 5.40  | 2.11  | 3607.00 | 6.60  | 2.61  | 0.95   |
| 1.37  | 3784.00 | 14.14 | 10.61 | 4.13  | 3805.00 | 13.96 | 9.97  | 3.61 y |
| 1.15  | 2203.00 | 4.22  | 0.69  | 0.27  | 3085.00 | 3.73  | 0.26  | -0.09  |
| -0.46 | 3838.00 | 4.92  | 1.39  | 0.54  | 4331.00 | 2.68  | 1.31  | -0.47  |
| 1.19  | 3810.00 | 10.08 | 6.55  | 2.55  | 5410.00 | 16.12 | 12.13 | 4.39 y |
| 1.38  | 4462.00 | 10.04 | 6.51  | 2.54  | 5166.00 | 3.45  | 0.54  | -0.20  |
| -0.14 | 2876.00 | 4.97  | 1.44  | 0.56  | 3815.00 | 3.56  | 0.43  | -0.15  |
| 0.42  | 2635.00 | 3.57  | 0.04  | 0.02  | 3308.00 | 0.91  | 3.08  | -1.12  |
| -0.08 | 2457.00 | 6.39  | 2.86  | 1.12  | 2800.00 | 4.14  | 0.15  | 0.06   |
| -0.56 | 5189.00 | 7.82  | 4.29  | 1.67  | 5395.00 | 2.15  | 1.84  | -0.66  |
| 0.01  | 3675.00 | 3.13  | 0.40  | -0.15 | 4711.00 | 4.27  | 0.28  | 0.10   |
| 1.12  | 4033.00 | 4.22  | 0.69  | 0.27  | 4305.00 | 6.11  | 2.12  | 0.77   |
| 0.08  | 4019.00 | 1.74  | 1.79  | -0.70 | 4103.00 | 6.36  | 2.37  | 0.86   |
| 1.96  | 3593.00 | 6.12  | 2.59  | 1.01  | 5268.00 | 17.84 | 13.85 | 5.02   |
| 1.22  | 2902.00 | 5.51  | 1.98  | 0.77  | 3851.00 | 13.11 | 9.12  | 3.31   |
| -0.37 | 2188.00 | 1.74  | 1.79  | -0.70 | 3343.00 | 4.25  | 0.26  | 0.09   |
| 0.83  | 2801.00 | 5.96  | 2.43  | 0.95  | 3100.00 | 7.87  | 3.88  | 1.41   |
| 1.00  | 1084.00 | 2.40  | 1.13  | -0.44 | 1954.00 | 9.37  | 5.38  | 1.95   |
| 1.13  | 3043.00 | 3.32  | 0.21  | -0.08 | 2612.00 | 11.41 | 7.42  | 2.69   |
| 0.24  | 2870.00 | 4.77  | 1.24  | 0.49  | 1980.00 | 4.24  | 0.25  | 0.09   |
| -0.04 | 2156.00 | 1.86  | 1.67  | -0.65 | 2776.00 | 12.93 | 8.94  | 3.24   |
| 0.25  | 3602.00 | 1.50  | 2.03  | -0.79 | 4510.00 | 10.64 | 6.65  | 2.41   |
| 0.15  | 3020.00 | 3.61  | 0.08  | 0.03  | 3134.00 | 6.70  | 2.71  | 0.98   |
| -0.16 | 2944.00 | 0.82  | 2.71  | -1.06 | 3612.00 | 9.14  | 5.15  | 1.87   |
| 2.13  | 3101.00 | 4.00  | 0.47  | 0.18  | 3853.00 | 7.89  | 3.90  | 1.41   |
| 0.66  | 3516.00 | 2.22  | 1.31  | -0.51 | 3041.00 | 7.00  | 3.01  | 1.09   |
| 2.64  | 3355.00 | 2.56  | 0.97  | -0.38 | 5154.00 | 17.04 | 13.05 | 4.73 y |
| -0.75 | 1990.00 | 0.50  | 3.03  | -1.18 | 3085.00 | 4.21  | 0.22  | 0.08   |
| 1.95  | 4579.00 | 3.80  | 0.27  | 0.11  | 2802.00 | 11.56 | 7.57  | 2.74   |
| 0.55  | 3144.00 | 0.76  | 2.77  | -1.08 | 2966.00 | 4.92  | 0.93  | 0.34   |
| -0.29 | 2292.00 | 4.71  | 1.18  | 0.46  | 3876.00 | 6.50  | 2.51  | 0.91   |

|         |         |       |         |       |         |       |       |         |
|---------|---------|-------|---------|-------|---------|-------|-------|---------|
| -0.42   | 2232.00 | 2.91  | 0.62    | -0.24 | 3496.00 | 1.49  | 2.50  | -0.90   |
| 1.72    | 2979.00 | 5.27  | 1.74    | 0.68  | 4522.00 | 10.99 | 7.00  | 2.54    |
| 2.98    | 2269.00 | 4.54  | 1.01    | 0.39  | 3396.00 | 2.86  | 1.13  | -0.41   |
| 4.89    | 1155.00 | 10.56 | 7.03    | 2.74  | 1415.00 | 1.84  | 2.15  | -0.78 x |
| 0.24    | 2213.00 | 2.17  | 1.36    | -0.53 | 4204.00 | 4.02  | 0.03  | 0.01    |
| 1.17    | 2546.00 | 4.75  | 1.22    | 0.48  | 3580.00 | 3.38  | 0.61  | -0.22   |
| -0.86   | 2479.00 | 2.46  | 1.07    | -0.42 | 2818.00 | 2.41  | 1.58  | -0.57   |
| -0.12   | 1516.00 | 3.17  | 0.36    | -0.14 | 2770.00 | 0.76  | 3.23  | -1.17   |
| 0.32    | 3196.00 | 3.35  | 0.18    | -0.07 | 3480.00 | 1.58  | 2.41  | -0.87   |
| -0.71   | 3539.00 | 2.68  | 0.85    | -0.33 | 4591.00 | 3.20  | 0.79  | -0.28   |
| -0.54   | 1206.00 | 5.56  | 2.03    | 0.79  | 2374.00 | 1.14  | 2.85  | -1.03   |
| 3.93    | 4505.00 | 6.99  | 3.46    | 1.35  | 2708.00 | 3.14  | 0.85  | -0.31   |
| -0.59   | 2979.00 | 3.02  | 0.51    | -0.20 | 4011.00 | 1.97  | 2.02  | -0.73   |
| 0.26    | 2187.00 | 5.44  | 1.91    | 0.75  | 2875.00 | 2.23  | 1.76  | -0.64   |
| -0.91   | 827.00  | 7.26  | 3.73    | 1.45  | 1336.00 | 1.05  | 2.94  | -1.06   |
| 0.10    | 2660.00 | 3.95  | 0.42    | 0.16  | 4295.00 | 4.68  | 0.69  | 0.25    |
| 0.78    | 4641.00 | 6.40  | 2.87    | 1.12  | 5158.00 | 3.33  | 0.66  | -0.24   |
| -1.19   | 3495.00 | 2.09  | 1.44    | -0.56 | 4387.00 | 0.59  | 3.40  | -1.23   |
| 1.19    | 4091.00 | 6.18  | 2.65    | 1.04  | 3198.00 | 3.44  | 0.55  | -0.20   |
| -0.12   | 1884.00 | 5.68  | 2.15    | 0.84  | 26.00   | 26.92 | 22.93 | 8.31    |
| 0.36    | 1910.00 | 9.84  | 6.31    | 2.46  | 2507.00 | 6.14  | 2.15  | 0.78    |
| 0.61    | 2168.00 | 5.40  | 1.87    | 0.73  | 2243.00 | 6.46  | 2.47  | 0.90    |
| 0.33    | 2384.00 | 10.57 | 7.04    | 2.74  | 2491.00 | 6.18  | 2.19  | 0.80    |
| 0.76    | 2448.00 | 3.59  | 0.06    | 0.03  | 1051.00 | 7.99  | 4.00  | 1.45    |
| 2.75    | 2898.00 | 19.08 | 15.55   | 6.06  | 1862.00 | 15.58 | 11.59 | 4.20 y  |
| 1.54    | 1619.00 | 6.86  | 3.33    | 1.30  | 1137.00 | 8.00  | 4.01  | 1.46    |
| 1.46    | 3503.00 | 6.85  | 3.32    | 1.30  | 2719.00 | 10.59 | 6.60  | 2.39    |
| -0.70   | 1969.00 | 1.07  | 2.46    | -0.96 | 2118.00 | 2.36  | 1.63  | -0.59   |
| -0.04   | 1974.00 | 5.32  | 1.79    | 0.70  | 527.00  | 9.30  | 5.31  | 1.92    |
| 2.83    | 2106.00 | 13.06 | 9.53    | 3.71  | 2793.00 | 13.43 | 9.44  | 3.42 y  |
| 0.40    | 2227.00 | 4.31  | 0.78    | 0.31  | 2203.00 | 3.72  | 0.27  | -0.10   |
| -0.51   | 2187.00 | 5.30  | 1.77    | 0.69  | 1845.00 | 2.44  | 1.55  | -0.56   |
| 0.68    | 2650.00 | 5.70  | 2.17    | 0.85  | 2439.00 | 3.85  | 0.14  | -0.05   |
| 0.48    | 3218.00 | 7.24  | 3.71    | 1.45  | 2427.00 | 3.67  | 0.32  | -0.12   |
| 3.52    | 170.00  | 15.88 | 12.35   | 4.81  | 3530.00 | 7.05  | 3.06  | 1.11 y  |
| 0.57    | 2933.00 | 9.68  | 6.15    | 2.40  | 2459.00 | 2.93  | 1.06  | -0.38   |
| -0.02   | 2618.00 | 6.61  | 3.08    | 1.20  | 1577.00 | 2.09  | 1.90  | -0.69   |
| 0.99    | 1985.00 | 8.61  | 5.08    | 1.98  | 1888.00 | 4.61  | 0.62  | 0.23    |
| 2.40    | 2409.00 | 4.48  | 0.95    | 0.37  | 1024.00 | 0.68  | 3.31  | -1.20   |
|         | 2951.50 | 3.53  | 1.73    |       | 2963.50 | 3.99  | 1.87  |         |
|         |         |       | 5.20    |       |         |       | 5.60  |         |
|         |         |       | 2.57    |       |         |       | 2.76  |         |
| 3126.00 | 19.61   |       | 3611.00 | 25.20 |         |       |       |         |
| 4393.00 | 21.74   |       |         |       | 4373.00 | 44.80 |       |         |
| 4416.00 | 16.19   |       | 3736.00 | 24.71 |         |       |       |         |
| 5078.00 | 36.24   |       | 3568.00 | 17.52 |         |       |       |         |

|         |       |         |       |
|---------|-------|---------|-------|
| 4253.25 | 23.44 | 3638.33 | 22.47 |
| 815.87  | 8.83  | 87.27   | 4.30  |
| 1953.00 | 2.41  | 1276.00 | 1.88  |
| 1492.00 | 2.21  | 1731.00 | 5.08  |
| 1677.00 | 2.33  | 1361.00 | 2.65  |
| 1466.00 | 2.39  | 1635.00 | 6.06  |
| 1647.00 | 2.33  | 1500.75 | 3.92  |
| 224.59  | 0.09  | 216.86  | 1.97  |
|         | 26.49 |         | 12.90 |
|         | 0.26  |         | 5.92  |
|         | 26.75 |         | 18.83 |
|         | 21.11 |         | 18.56 |
|         | 1.27  |         | 1.01  |
|         | -0.27 |         | -0.01 |

highlighted = image-confirmed



tox a,c





toxic a,b,c



toxic b,c

| Plate    | Well | Gene                                | GeneID            | Cell Coun | % inf | Abs Dev |
|----------|------|-------------------------------------|-------------------|-----------|-------|---------|
| 50023.00 | A02  | M-004439- programmed cell death     | 9141.00 PDCD5     | 1258.00   | 2.07  | 3.25    |
| 50023.00 | A04  | M-004438- programmed cell death     | 27250.00 PDCD4    | 2428.00   | 2.18  | 3.14    |
| 50023.00 | A05  | M-011726- Meis homeobox 1           | 4211.00 MEIS1     | 2556.00   | 3.36  | 1.96    |
| 50023.00 | A06  | M-004436- programmed cell death     | 11235.00 PDCD10   | 2859.00   | 3.67  | 1.65    |
| 50023.00 | A07  | M-003905- RAB8A, member RAS o       | 4218.00 RAB8A     | 4759.00   | 5.17  | 0.15    |
| 50023.00 | A08  | M-017675- PDGFA associated prot     | 11333.00 PDAP1    | 2516.00   | 1.83  | 3.49    |
| 50023.00 | A09  | M-005942- meprin A, beta            | 4225.00 MEP1B     | 2606.00   | 6.37  | 1.05    |
| 50023.00 | A10  | M-012836- tudor domain containi     | 23424.00 TDRD7    | 2575.00   | 5.32  | 0.00    |
| 50023.00 | A11  | M-014164- mesoderm developme        | 59274.00 MESDC1   | 2562.00   | 3.32  | 2.00    |
| 50023.00 | A12  | M-012900- protocadherin LKC         | 54825.00 PCLKC    | 3099.00   | 3.45  | 1.87    |
| 50023.00 | A13  | M-030446- mesoderm developme        | 23184.00 MESDC2   | 1689.00   | 4.97  | 0.35    |
| 50023.00 | A14  | M-013194- protocadherin 9           | 5101.00 PCDH9     | 3382.00   | 2.10  | 3.22    |
| 50023.00 | A15  | M-011331- MFNG O-fucosylpeptid      | 4242.00 MFNG      | 2918.00   | 3.60  | 1.72    |
| 50023.00 | A16  | M-013372- protocadherin 18          | 54510.00 PCDH18   | 3423.00   | 3.10  | 2.22    |
| 50023.00 | A17  | M-009019- maltase-glucoamylase      | 8972.00 MGAM      | 2449.00   | 2.04  | 3.28    |
| 50023.00 | A18  | M-012528- protocadherin 17          | 27253.00 PCDH17   | 2362.00   | 6.65  | 1.33    |
| 50023.00 | A19  | M-014865- chromosome 9 open re      | 84302.00 C9orf125 | 1489.00   | 13.57 | 8.25    |
| 50023.00 | A20  | M-008748- pterin-4 alpha-carbinol   | 5092.00 PCBD1     | 1757.00   | 5.29  | 0.03    |
| 50023.00 | A21  | M-022312- RCC1 domain containir     | 91433.00 RCCD1    | 3461.00   | 7.34  | 2.02    |
| 50023.00 | A23  | M-016541- F-box protein 31          | 79791.00 FBXO31   | 1452.00   | 2.62  | 2.70    |
| 50023.00 | B02  | M-012787- Xg blood group            | 7499.00 XG        | 3197.00   | 0.56  | 4.76    |
| 50023.00 | B04  | M-013858- NDRG family member        | 57447.00 NDRG2    | 5188.00   | 7.88  | 2.56    |
| 50023.00 | B05  | M-004233- programmed cell death     | 10015.00 PDCD6IP  | 6308.00   | 4.71  | 0.61    |
| 50023.00 | B06  | M-010563- N-myc downstream reg      | 10397.00 NDRG1    | 3355.00   | 2.03  | 3.29    |
| 50023.00 | B07  | M-007651- phosphodiesterase 6A,     | 5145.00 PDE6A     | 4911.00   | 6.64  | 1.32    |
| 50023.00 | B08  | M-010637- calcium binding and co    | 10241.00 CALCOCO2 | 2312.00   | 3.68  | 1.64    |
| 50023.00 | B09  | M-007652- phosphodiesterase 6B,     | 5158.00 PDE6B     | 4146.00   | 4.25  | 1.07    |
| 50023.00 | B10  | M-018571- nudE nuclear distributi   | 81565.00 NDEL1    | 3414.00   | 3.05  | 2.27    |
| 50023.00 | B11  | M-007653- phosphodiesterase 6C,     | 5146.00 PDE6C     | 4115.00   | 3.43  | 1.89    |
| 50023.00 | B12  | M-020625- nudE nuclear distributi   | 54820.00 NDE1     | 918.00    | 1.20  | 4.12    |
| 50023.00 | B13  | M-009804- peroxisomal D3,D2-en      | 10455.00 Peci     | 2975.00   | 10.56 | 5.24    |
| 50023.00 | B14  | M-019865- natural cytotoxicity trig | 9436.00 NCR2      | 3505.00   | 1.37  | 3.95    |
| 50023.00 | B15  | M-004463- proline, glutamic acid    | 27043.00 PELP1    | 4284.00   | 5.44  | 0.12    |
| 50023.00 | B16  | M-018862- nuclear receptor coact    | 135112.00 NCOA7   | 4091.00   | 2.44  | 2.88    |
| 50023.00 | B17  | M-005990- peptidase D               | 5184.00 PEPD      | 2572.00   | 2.61  | 2.72    |
| 50023.00 | B18  | M-013157- nuclear receptor coact    | 57727.00 NCOA5    | 4258.00   | 1.67  | 3.65    |
| 50023.00 | B19  | M-018111- PERP, TP53 apoptosis      | 64065.00 PERP     | 4571.00   | 6.80  | 1.48    |
| 50023.00 | B20  | M-010640- NCK-associated proteir    | 10787.00 NCKAP1   | 4019.00   | 2.61  | 2.71    |
| 50023.00 | B21  | M-009542- pescadillo homolog 1,     | 23481.00 PES1     | 3602.00   | 2.14  | 3.18    |
| 50023.00 | B23  | M-010331- peroxisome biogenesis     | 5189.00 PEX1      | 4043.00   | 4.45  | 0.87    |
| 50023.00 | C02  | M-019679- phosphatidylethanol       | 5037.00 PEBP1     | 3933.00   | 4.40  | 0.92    |
| 50023.00 | C04  | M-012795- PAX interacting (with t   | 22976.00 PAXIP1   | 3490.00   | 0.63  | 4.69    |
| 50023.00 | C05  | M-013565- armadillo repeat conta    | 93436.00 ARMC6    | 4871.00   | 4.45  | 0.87    |
| 50023.00 | C06  | M-011098- paired box gene 6 (ani    | 5080.00 PAX6      | 3615.00   | 6.20  | 0.88    |
| 50023.00 | C07  | M-018622- suppressor of variegati   | 84787.00 SUV420H2 | 5753.00   | 4.47  | 0.85    |
| 50023.00 | C08  | M-003921- paired box gene 2         | 5076.00 PAX2      | 3119.00   | 6.09  | 0.77    |

|          |     |                                    |           |          |         |       |       |
|----------|-----|------------------------------------|-----------|----------|---------|-------|-------|
| 50023.00 | C09 | M-014156- interferon, alpha 7      | 3444.00   | IFNA7    | 4403.00 | 2.98  | 2.34  |
| 50023.00 | C10 | M-005984- Parkinson disease (aut   | 11315.00  | PARK7    | 1991.00 | 0.90  | 4.42  |
| 50023.00 | C11 | M-007687- SPEG complex locus       | 10290.00  | SPEG     | 3154.00 | 4.88  | 0.44  |
| 50023.00 | C12 | M-008053- progestin and adipoQ r   | 152559.00 | PAQR3    | 3071.00 | 5.50  | 0.18  |
| 50023.00 | C13 | M-015491- coiled-coil domain con   | 115106.00 | CCDC5    | 1721.00 | 4.13  | 1.19  |
| 50023.00 | C14 | M-018253- pannexin 1               | 24145.00  | PANX1    | 4287.00 | 8.37  | 3.05  |
| 50023.00 | C15 | M-026322- phosphatidic acid phos   | 196051.00 | PPAPDC1A | 4195.00 | 3.34  | 1.98  |
| 50023.00 | C16 | M-003980- phosphoribosylaminoi     | 10606.00  | PAICS    | 3820.00 | 1.86  | 3.46  |
| 50023.00 | C17 | M-015567- high-mobility group nu   | 3150.00   | HMGN1    | 1692.00 | 1.65  | 3.67  |
| 50023.00 | C18 | M-010330- platelet-activating fact | 5048.00   | PAFAH1B1 | 2791.00 | 8.17  | 2.85  |
| 50023.00 | C19 | M-017567- high mobility group nu   | 10473.00  | HMGN4    | 1096.00 | 4.11  | 1.21  |
| 50023.00 | C20 | M-011803- poly(A) binding proteir  | 8106.00   | PABPN1   | 3310.00 | 3.08  | 2.24  |
| 50023.00 | C21 | M-020001- homeobox (H6 family)     | 3166.00   | HMX1     | 2384.00 | 1.85  | 3.47  |
| 50023.00 | C23 | M-003406- hepatocyte nuclear fac   | 3172.00   | HNF4A    | 2308.00 | 1.39  | 3.93  |
| 50023.00 | D02 | M-006540- neuroblastoma, suppre    | 4681.00   | NBL1     | 3875.00 | 0.54  | 4.78  |
| 50023.00 | D04 | M-012802- N-acetyltransferase 6    | 24142.00  | NAT6     | 3261.00 | 4.17  | 1.15  |
| 50023.00 | D05 | M-012622- peroxisomal biogenesi    | 8800.00   | PEX11A   | 4931.00 | 4.99  | 0.33  |
| 50023.00 | D06 | M-008884- N-acetyltransferase 1 (  | 9.00      | NAT1     | 4190.00 | 5.18  | 0.14  |
| 50023.00 | D07 | M-019520- peroxisomal biogenesi    | 8799.00   | PEX11B   | 2842.00 | 8.23  | 2.91  |
| 50023.00 | D08 | M-014387- NMDA receptor regula     | 79664.00  | NARG2    | 4385.00 | 9.24  | 3.92  |
| 50023.00 | D09 | M-012676- peroxisomal biogenesi    | 5195.00   | PEX14    | 3951.00 | 9.29  | 3.97  |
| 50023.00 | D10 | M-019254- NLR family, pyrin doma   | 338321.00 | NLRP9    | 3222.00 | 5.46  | 0.14  |
| 50023.00 | D11 | M-011945- peroxisomal biogenesi    | 9409.00   | PEX16    | 2473.00 | 2.51  | 2.81  |
| 50023.00 | D12 | M-019472- NLR family, pyrin doma   | 126205.00 | NLRP8    | 3905.00 | 9.53  | 4.21  |
| 50023.00 | D13 | M-019544- peroxisomal biogenesi    | 8504.00   | PEX3     | 3602.00 | 12.10 | 6.78  |
| 50023.00 | D14 | M-004423- NLR family, pyrin doma   | 22861.00  | NLRP1    | 2881.00 | 5.31  | 0.01  |
| 50023.00 | D15 | M-012648- complement factor prc    | 5199.00   | CFP      | 3716.00 | 2.88  | 2.44  |
| 50023.00 | D16 | M-011090- N-acetylgalactosaminic   | 4668.00   | NAGA     | 4042.00 | 4.06  | 1.26  |
| 50023.00 | D17 | M-013011- prefoldin subunit 2      | 5202.00   | PFDN2    | 2389.00 | 6.15  | 0.83  |
| 50023.00 | D18 | M-013091- myosin, light chain 6, a | 4637.00   | MYL6     | 3934.00 | 7.24  | 1.92  |
| 50023.00 | D19 | M-012003- profilin 1               | 5216.00   | PFN1     | 4053.00 | 13.40 | 8.08  |
| 50023.00 | D20 | M-011739- myosin, light chain 5, r | 4636.00   | MYL5     | 2607.00 | 2.38  | 2.94  |
| 50023.00 | D21 | M-008712- phosphoglycerate mut     | 5224.00   | PGAM2    | 6338.00 | 21.68 | 16.36 |
| 50023.00 | D23 | M-017610- piggyBac transposable    | 267004.00 | PGBD3    | 4201.00 | 3.83  | 1.49  |
| 50023.00 | E02 | M-018580- chromosome 11 open       | 83638.00  | C11orf68 | 1591.00 | 5.85  | 0.53  |
| 50023.00 | E04 | M-020026- protein disulfide isome  | 10130.00  | PDIA6    | 2483.00 | 7.85  | 2.53  |
| 50023.00 | E05 | M-008221- heterogeneous nuclear    | 3178.00   | HNRPA1   | 4107.00 | 32.90 | 27.58 |
| 50023.00 | E06 | M-013820- family with sequence s   | 55578.00  | FAM48A   | 1980.00 | 6.11  | 0.79  |
| 50023.00 | E07 | M-011692- heterogeneous nuclear    | 3190.00   | HNRPK    | 2013.00 | 7.15  | 1.83  |
| 50023.00 | E08 | M-006287- purinergic receptor P2i  | 9127.00   | P2RXL1   | 3010.00 | 1.79  | 3.53  |
| 50023.00 | E09 | M-017345- homeobox D3              | 3232.00   | HOXD3    | 2512.00 | 6.73  | 1.41  |
| 50023.00 | E10 | M-006286- purinergic receptor P2i  | 5026.00   | P2RX5    | 1781.00 | 3.93  | 1.39  |
| 50023.00 | E11 | M-009339- haptoglobin              | 3240.00   | HP       | 2242.00 | 11.02 | 5.70  |
| 50023.00 | E12 | M-020619- phosphoinositide-3-kir   | 23533.00  | PIK3R5   | 2219.00 | 4.10  | 1.22  |
| 50023.00 | E13 | M-019648- 4-hydroxyphenylpyruv     | 3242.00   | HPD      | 3709.00 | 9.68  | 4.36  |
| 50023.00 | E14 | M-015273- candidate tumor suppr    | 124641.00 | OVCA2    | 3068.00 | 25.55 | 20.23 |
| 50023.00 | E15 | M-008735- hypoxanthine phosphc     | 3251.00   | HPRT1    | 4577.00 | 21.98 | 16.66 |

|          |     |                                     |           |          |         |       |       |
|----------|-----|-------------------------------------|-----------|----------|---------|-------|-------|
| 50023.00 | E16 | M-017390- otoraplin                 | 56914.00  | OTOR     | 3090.00 | 7.28  | 1.96  |
| 50023.00 | E17 | M-011054- Hermansky-Pudlak syn      | 3257.00   | HPS1     | 3835.00 | 4.93  | 0.39  |
| 50023.00 | E18 | M-011942- otoferlin                 | 9381.00   | OTOF     | 2339.00 | 6.07  | 0.75  |
| 50023.00 | E19 | M-017309- Hermansky-Pudlak syn      | 84343.00  | HPS3     | 5291.00 | 7.50  | 2.18  |
| 50023.00 | E20 | M-016394- otoancorin                | 146183.00 | OTOA     | 3964.00 | 18.11 | 12.79 |
| 50023.00 | E21 | M-017466- Hermansky-Pudlak syn      | 79803.00  | HPS6     | 4719.00 | 10.17 | 4.85  |
| 50023.00 | E23 | M-010287- HRAS-like suppressor      | 57110.00  | HRASLS   | 4670.00 | 11.56 | 6.24  |
| 50023.00 | F02 | M-011088- myosin, light chain 3, a  | 4634.00   | MYL3     | 3851.00 | 3.56  | 1.76  |
| 50023.00 | F04 | M-011087- myosin, light chain 2, r  | 4633.00   | MYL2     | 2975.00 | 5.61  | 0.29  |
| 50023.00 | F05 | M-013726- prostaglandin D2 syntf    | 27306.00  | PGDS     | 4241.00 | 5.56  | 0.24  |
| 50023.00 | F06 | M-012816- c-myc binding protein     | 26292.00  | MYCBP    | 2743.00 | 7.18  | 1.86  |
| 50023.00 | F07 | M-010642- progesterone receptor     | 10857.00  | PGRMC1   | 3709.00 | 12.43 | 7.11  |
| 50023.00 | F08 | M-011735- myxovirus (influenza vi   | 4599.00   | MX1      | 4079.00 | 8.51  | 3.19  |
| 50023.00 | F09 | M-009011- hypoxia-inducible factc   | 54681.00  | PH-4     | 4597.00 | 11.77 | 6.45  |
| 50023.00 | F10 | M-012806- mutY homolog (E. coli)    | 4595.00   | MUTYH    | 3069.00 | 4.92  | 0.40  |
| 50023.00 | F11 | M-021411- tetraspanin 32            | 10077.00  | TSPAN32  | 2656.00 | 3.43  | 1.89  |
| 50023.00 | F12 | M-029113- mucin 3A, cell surface    | 4584.00   | MUC3A    | 2547.00 | 6.12  | 0.80  |
| 50023.00 | F13 | M-011411- pleckstrin homology-lil   | 7262.00   | PHLDA2   | 3299.00 | 13.25 | 7.93  |
| 50023.00 | F14 | M-019667- metaxin 1                 | 4580.00   | MTX1     | 1998.00 | 5.51  | 0.19  |
| 50023.00 | F15 | M-020169- pleckstrin homology-lil   | 23612.00  | PHLDA3   | 3175.00 | 5.51  | 0.19  |
| 50023.00 | F16 | M-009896- 5-methyltetrahydrofoli    | 4548.00   | MTR      | 3763.00 | 10.44 | 5.12  |
| 50023.00 | F17 | M-013848- putative homeodomain      | 57157.00  | PHTF2    | 4695.00 | 3.90  | 1.42  |
| 50023.00 | F18 | M-009577- methylenetetrahydrofo     | 4522.00   | MTHFD1   | 2883.00 | 14.15 | 8.83  |
| 50023.00 | F19 | M-012245- phytanoyl-CoA 2-hydr      | 5264.00   | PHYH     | 4709.00 | 18.35 | 13.03 |
| 50023.00 | F20 | M-020677- mature T-cell prolifera   | 4515.00   | MTCP1    | 3528.00 | 6.83  | 1.51  |
| 50023.00 | F21 | M-008167- protein inhibitor of act  | 8554.00   | PIAS1    | 4268.00 | 9.70  | 4.38  |
| 50023.00 | F23 | M-009108- phosphatidylinositol (4   | 27124.00  | PIB5PA   | 3183.00 | 3.39  | 1.93  |
| 50023.00 | G02 | M-008409- oxysterol binding prote   | 114884.00 | OSBPL10  | 2945.00 | 2.17  | 3.15  |
| 50023.00 | G04 | M-032263- olfactory receptor, fan   | 26494.00  | OR8G1    | 3489.00 | 2.81  | 2.51  |
| 50023.00 | G05 | M-011873- HIV-1 Rev binding prot    | 3267.00   | HRB      | 1856.00 | 3.99  | 1.33  |
| 50023.00 | G06 | M-032262- olfactory receptor, fan   | 391632.00 | OR7E35P  | 3241.00 | 4.01  | 1.31  |
| 50023.00 | G07 | M-011697- histidine rich calcium b  | 3270.00   | HRC      | 2870.00 | 3.17  | 2.15  |
| 50023.00 | G08 | M-025384- olfactory receptor, fan   | 393046.00 | OR2A5    | 3458.00 | 13.91 | 8.59  |
| 50023.00 | G09 | M-008216- harakiri, BCL2 interacti  | 8739.00   | HRK      | 2388.00 | 4.73  | 0.59  |
| 50023.00 | G10 | M-016269- optineurin                | 10133.00  | OPTN     | 1189.00 | 5.55  | 0.23  |
| 50023.00 | G11 | M-021242- DCP1 decapping enzym      | 55802.00  | DCP1A    | 3956.00 | 4.63  | 0.69  |
| 50023.00 | G12 | M-014595- optic atrophy 3 (autos    | 80207.00  | OPA3     | 2950.00 | 4.81  | 0.51  |
| 50023.00 | G13 | M-003408- p65 protein               | 55566.00  | HSAJ2425 | 3017.00 | 16.37 | 11.05 |
| 50023.00 | G14 | M-009000- oligodendrocyte transc    | 167826.00 | OLIG3    | 3133.00 | 13.18 | 7.86  |
| 50023.00 | G15 | M-008972- hydroxy-delta-5-steroid   | 3283.00   | HSD3B1   | 4580.00 | 3.86  | 1.46  |
| 50023.00 | G16 | M-009300- oral-facial-digital syndr | 8481.00   | OFD1     | 3185.00 | 5.56  | 0.24  |
| 50023.00 | G17 | M-012542- hydroxy-delta-5-steroid   | 3284.00   | HSD3B2   | 3153.00 | 10.15 | 4.83  |
| 50023.00 | G18 | M-024101- odz, odd Oz/ten-m hor     | 55714.00  | ODZ3     | 3789.00 | 15.78 | 10.46 |
| 50023.00 | G19 | M-012343- heat shock transcriptio   | 11077.00  | HSF2BP   | 4885.00 | 10.03 | 4.71  |
| 50023.00 | G20 | M-010026- oculocerebrorenal syn     | 4952.00   | OCRL     | 2857.00 | 7.25  | 1.93  |
| 50023.00 | G21 | M-005168- heat shock 70kDa prot     | 3303.00   | HSPA1A   | 2967.00 | 4.89  | 0.43  |
| 50023.00 | G23 | M-005269- heat shock 27kDa prot     | 3315.00   | HSPB1    | 1656.00 | 1.45  | 3.87  |

|          |     |                                    |           |          |         |       |       |
|----------|-----|------------------------------------|-----------|----------|---------|-------|-------|
| 50023.00 | H02 | M-013953- Mdm2, transformed 3'     | 27085.00  | MTBP     | 3928.00 | 1.68  | 3.64  |
| 50023.00 | H04 | M-010953- metallothionein 1L (ge   | 4500.00   | MT1L     | 4345.00 | 5.75  | 0.43  |
| 50023.00 | H05 | M-016285- phosphoinositide-3-kin   | 118788.00 | PIK3AP1  | 4580.00 | 5.52  | 0.20  |
| 50023.00 | H06 | M-011732- moesin                   | 4478.00   | MSN      | 3988.00 | 16.32 | 11.00 |
| 50023.00 | H07 | M-003292- protein (peptidylprolyl  | 5301.00   | PIN1L    | 3971.00 | 18.69 | 13.37 |
| 50023.00 | H08 | M-019665- mutS homolog 3 (E. co    | 4437.00   | MSH3     | 2859.00 | 8.04  | 2.72  |
| 50023.00 | H09 | M-021326- myotubularin related p   | 54545.00  | MTMR12   | 3333.00 | 2.64  | 2.68  |
| 50023.00 | H10 | M-021375- murine retrovirus integ  | 10335.00  | MRVI1    | 3470.00 | 3.80  | 1.52  |
| 50023.00 | H11 | M-018010- phosphatidylinositol tr  | 5306.00   | PITPNA   | 2792.00 | 6.77  | 1.45  |
| 50023.00 | H12 | M-014172- paroxysmal nonkinesic    | 25953.00  | PNKD     | 1573.00 | 3.37  | 1.95  |
| 50023.00 | H13 | M-004643- piwi-like 1 (Drosophila) | 9271.00   | PIWIL1   | 2274.00 | 3.12  | 2.20  |
| 50023.00 | H14 | M-010119- mercaptopyruvate sulf    | 4357.00   | MPST     | 1895.00 | 6.12  | 0.80  |
| 50023.00 | H15 | M-004642- piwi-like 2 (Drosophila) | 55124.00  | PIWIL2   | 2926.00 | 13.50 | 8.18  |
| 50023.00 | H16 | M-008034- progesterin and adipoQ r | 54852.00  | PAQR5    | 3726.00 | 10.68 | 5.36  |
| 50023.00 | H17 | M-013923- PBX/knotted 1 homeol     | 63876.00  | PKNOX2   | 4927.00 | 7.65  | 2.33  |
| 50023.00 | H18 | M-021327- M-phase phosphoprote     | 10198.00  | MPHOSPH  | 2914.00 | 7.45  | 2.13  |
| 50023.00 | H19 | M-009370- phospholipase A2, gro    | 8399.00   | PLA2G10  | 3685.00 | 8.14  | 2.82  |
| 50023.00 | H20 | M-020018- M-phase phosphoprote     | 10200.00  | MPHOSPH  | 2587.00 | 3.59  | 1.73  |
| 50023.00 | H21 | M-008820- phospholipase A2, gro    | 8681.00   | PLA2G4B  | 3034.00 | 2.77  | 2.55  |
| 50023.00 | H23 | M-009663- phospholipase A2, gro    | 8605.00   | PLA2G4C  | 5083.00 | 4.43  | 0.89  |
| 50023.00 | I02 | M-011345- occludin                 | 4950.00   | OCLN     | 4002.00 | 1.80  | 3.52  |
| 50023.00 | I04 | M-027177- obscurin, cytoskeletal   | 84033.00  | OBSCN    | 2479.00 | 1.21  | 4.11  |
| 50023.00 | I05 | M-008830- heat shock 27kDa prot    | 8988.00   | HSPB3    | 2984.00 | 9.75  | 4.43  |
| 50023.00 | I06 | M-032248- leptin receptor overlap  | 54741.00  | LEPROT   | 2096.00 | 6.35  | 1.03  |
| 50023.00 | I07 | M-016607- hsp70-interacting prot   | 23640.00  | HSPBP1   | 2939.00 | 2.65  | 2.67  |
| 50023.00 | I08 | M-012907- zinc finger protein 423  | 23090.00  | ZNF423   | 2754.00 | 4.18  | 1.14  |
| 50023.00 | I09 | M-018876- armadillo repeat conta   | 25852.00  | ARMC8    | 2177.00 | 6.20  | 0.88  |
| 50023.00 | I10 | M-014165- nyctalopin               | 60506.00  | NYX      | 1344.00 | 2.31  | 3.01  |
| 50023.00 | I11 | M-020711- chromosome 18 open       | 29090.00  | C18orf55 | 1867.00 | 7.18  | 1.86  |
| 50023.00 | I12 | M-004754- nucleolar and spindle    | 51203.00  | NUSAP1   | 3332.00 | 6.66  | 1.34  |
| 50023.00 | I13 | M-019649- heat shock 10kDa prot    | 3336.00   | HSPE1    | 2918.00 | 10.66 | 5.34  |
| 50023.00 | I14 | M-011980- nucleoporin 214kDa       | 8021.00   | NUP214   | 2332.00 | 5.75  | 0.43  |
| 50023.00 | I15 | M-032275- succinate dehydrogen     | 54727.00  | HSSUCCDH | 2176.00 | 7.86  | 2.54  |
| 50023.00 | I16 | M-015902- numb homolog (Droso      | 8650.00   | NUMB     | 1602.00 | 2.75  | 2.57  |
| 50023.00 | I17 | M-008870- forkhead box N2          | 3344.00   | FOXN2    | 1199.00 | 9.42  | 4.10  |
| 50023.00 | I18 | M-008719- nudix (nucleoside diph   | 318.00    | NUDT2    | 2737.00 | 10.71 | 5.39  |
| 50023.00 | I19 | M-011055- histatin 3               | 3347.00   | HTN3     | 1662.00 | 11.19 | 5.87  |
| 50023.00 | I20 | M-018325- nuclear distribution ge  | 10726.00  | NUDC     | 2948.00 | 14.04 | 8.72  |
| 50023.00 | I21 | M-004899- phosphatidic acid phos   | 84513.00  | PPAPDC1B | 2534.00 | 16.10 | 10.78 |
| 50023.00 | I23 | M-003267- HUS1 checkpoint hom      | 3364.00   | HUS1     | 2185.00 | 6.22  | 0.90  |
| 50023.00 | J02 | M-012181- CD200 molecule           | 4345.00   | CD200    | 3641.00 | 5.77  | 0.45  |
| 50023.00 | J04 | M-008976- MLX interacting protei   | 22877.00  | MLXIP    | 3753.00 | 10.47 | 5.15  |
| 50023.00 | J05 | M-015328- phospholipase A2 rece    | 22925.00  | PLA2R1   | 3636.00 | 3.33  | 1.99  |
| 50023.00 | J06 | M-020993- molybdenum cofactor      | 55034.00  | MOCOS    | 3572.00 | 2.88  | 2.44  |
| 50023.00 | J07 | M-008274- phospholipase C, beta    | 5330.00   | PLCB2    | 3053.00 | 10.55 | 5.23  |
| 50023.00 | J08 | M-011336- meningioma (disrupter    | 4330.00   | MN1      | 4446.00 | 18.98 | 13.66 |
| 50023.00 | J09 | M-019594- pleckstrin               | 5341.00   | PLEK     | 2462.00 | 9.75  | 4.43  |



|          |     |                                                                       |           |          |         |       |      |
|----------|-----|-----------------------------------------------------------------------|-----------|----------|---------|-------|------|
| 50023.00 | J10 | M-012390- multimerin 1                                                | 22915.00  | MMRN1    | 3453.00 | 7.56  | 2.24 |
| 50023.00 | J11 | M-020861- pleckstrin 2                                                | 26499.00  | PLEK2    | 3475.00 | 6.39  | 1.07 |
| 50023.00 | J12 | M-004145- matrix metallopeptidase 14                                  | 4323.00   | MMP14    | 2638.00 | 5.19  | 0.13 |
| 50023.00 | J13 | M-012753- pleckstrin homology domain 1                                | 10979.00  | PLEKHC1  | 3408.00 | 9.15  | 3.83 |
| 50023.00 | J14 | M-005112- membrane metallo-endopeptidase                              | 4311.00   | MME      | 2133.00 | 3.28  | 2.04 |
| 50023.00 | J15 | M-003752- growth arrest and DNA damage-inducible protein 4            | 90480.00  | GADD45GI | 2659.00 | 7.03  | 1.71 |
| 50023.00 | J16 | M-015137- methylmalonic aciduria and homocystinuria, cblB type        | 326625.00 | MMAB     | 2611.00 | 12.91 | 7.59 |
| 50023.00 | J17 | M-015408- proteolipid protein 1 (family 1)                            | 5354.00   | PLP1     | 2542.00 | 7.55  | 2.23 |
| 50023.00 | J18 | M-018697- MARCKS-like 1                                               | 65108.00  | MARCKSL1 | 1387.00 | 5.55  | 0.23 |
| 50023.00 | J19 | M-031971- plexin A1                                                   | 5361.00   | PLXNA1   | 3215.00 | 8.96  | 3.64 |
| 50023.00 | J20 | M-016352- myeloid/lymphoid or neural factor 1                         | 4298.00   | MLLT1    | 2292.00 | 1.00  | 4.32 |
| 50023.00 | J21 | M-025454- plexin A4, A                                                | 57671.00  | PLXNA4A  | 2833.00 | 7.45  | 2.13 |
| 50023.00 | J23 | M-010653- NODAL modulator 1                                           | 23420.00  | NOMO1    | 3734.00 | 11.57 | 6.25 |
| 50023.00 | K02 | M-014208- nuclear casein kinase A2                                    | 64710.00  | NUCKS1   | 4930.00 | 3.23  | 2.09 |
| 50023.00 | K04 | M-009314- nuclear receptor interacting protein 2                      | 83714.00  | NRIP2    | 2155.00 | 6.31  | 0.99 |
| 50023.00 | K05 | M-017519- HUS1 checkpoint homolog 1                                   | 135458.00 | HUS1B    | 1754.00 | 5.82  | 0.50 |
| 50023.00 | K06 | M-013496- neuregulin 2                                                | 9542.00   | NRG2     | 3018.00 | 5.93  | 0.61 |
| 50023.00 | K07 | M-012448- SET domain containing protein 2                             | 29072.00  | SETD2    | 1216.00 | 4.69  | 0.63 |
| 50023.00 | K08 | M-006334- NAD(P)H dehydrogenase, quinone 2                            | 4835.00   | NQO2     | 2780.00 | 6.22  | 0.90 |
| 50023.00 | K09 | M-012810- PRP40 pre-mRNA processing factor 1                          | 25766.00  | PRPF40B  | 2864.00 | 7.58  | 2.26 |
| 50023.00 | K10 | M-011343- neuronal pentraxin I                                        | 4884.00   | NPTX1    | 1666.00 | 1.20  | 4.12 |
| 50023.00 | K11 | M-012763- Huntingtin interacting protein 1                            | 11153.00  | HYPE     | 2037.00 | 3.49  | 1.83 |
| 50023.00 | K12 | M-015645- tumor suppressor candidate 4                                | 10641.00  | TUSC4    | 2161.00 | 8.24  | 2.92 |
| 50023.00 | K13 | M-028643- inhibitor of Bruton agammaglobulinemia protein kinase       | 25998.00  | IBTK     | 2203.00 | 6.17  | 0.85 |
| 50023.00 | K14 | M-015737- nucleophosmin (nucleolar phosphoprotein)                    | 4869.00   | NPM1     | 2136.00 | 4.73  | 0.59 |
| 50023.00 | K15 | M-012407- inducible T-cell co-stimulator 1                            | 29851.00  | ICOS     | 2979.00 | 1.75  | 3.57 |
| 50023.00 | K16 | M-021200- nephrosis 2, idiopathic                                     | 7827.00   | NPHS2    | 2047.00 | 6.40  | 1.08 |
| 50023.00 | K17 | M-005051- inhibitor of DNA binding 1                                  | 3397.00   | ID1      | 2794.00 | 3.08  | 2.24 |
| 50023.00 | K18 | M-017216- Niemann-Pick disease, type C1                               | 10577.00  | NPC2     | 1953.00 | 9.88  | 4.56 |
| 50023.00 | K19 | M-009864- inhibitor of DNA binding 2                                  | 3398.00   | ID2      | 3074.00 | 1.59  | 3.73 |
| 50023.00 | K20 | M-008857- neuronal PAS domain protein 2                               | 4862.00   | NPAS2    | 1772.00 | 10.50 | 5.18 |
| 50023.00 | K21 | M-005899- insulin-degrading enzyme                                    | 3416.00   | IDE      | 2216.00 | 8.57  | 3.25 |
| 50023.00 | K23 | M-009357- isopentenyl-diphosphate delta isomerase 1                   | 3422.00   | IDI1     | 2600.00 | 7.15  | 1.83 |
| 50023.00 | L02 | M-012703- myeloid leukemia factor 2                                   | 8079.00   | MLF2     | 1622.00 | 6.97  | 1.65 |
| 50023.00 | L04 | M-012013- ataxin 3                                                    | 4287.00   | ATXN3    | 3664.00 | 5.65  | 0.33 |
| 50023.00 | L05 | M-005275- phorbol-12-myristate-13-acetate-induced protein 1           | 5366.00   | PMAIP1   | 2261.00 | 6.46  | 1.14 |
| 50023.00 | L06 | M-016471- mirror-image polyductin 1                                   | 145282.00 | MIPOL1   | 3294.00 | 8.01  | 2.69 |
| 50023.00 | L07 | M-008454- peripheral myelin protein 2                                 | 5375.00   | PMP2     | 2845.00 | 9.17  | 3.85 |
| 50023.00 | L08 | M-011335- macrophage migration inhibitory factor                      | 4282.00   | MIF      | 3197.00 | 11.73 | 6.41 |
| 50023.00 | L09 | M-010616- peripheral myelin protein 22                                | 5376.00   | PMP22    | 3663.00 | 5.19  | 0.13 |
| 50023.00 | L10 | M-010189- microtubule associated protein 2                            | 9645.00   | MICAL2   | 1597.00 | 2.07  | 3.25 |
| 50023.00 | L11 | M-012722- paraneoplastic antigen A2                                   | 9240.00   | PNMA1    | 2881.00 | 1.91  | 3.41 |
| 50023.00 | L12 | M-016601- chromosome 18 open reading frame 8                          | 29919.00  | C18orf8  | 3165.00 | 5.09  | 0.23 |
| 50023.00 | L13 | M-005164- polymerase (DNA directed) delta                             | 5423.00   | POLB     | 3037.00 | 5.17  | 0.15 |
| 50023.00 | L14 | M-011083- class II, major histocompatibility complex, invariant chain | 4261.00   | CIITA    | 2791.00 | 7.60  | 2.28 |
| 50023.00 | L15 | M-011594- polymerase (RNA) III (DNA directed)                         | 661.00    | POLR3D   | 3216.00 | 1.90  | 3.42 |
| 50023.00 | L16 | M-009403- monoglyceride lipase                                        | 11343.00  | MGLL     | 1847.00 | 2.82  | 2.50 |

|          |            |                                           |                  |               |                |              |              |
|----------|------------|-------------------------------------------|------------------|---------------|----------------|--------------|--------------|
| 50023.00 | L17        | M-020595- POM121 membrane gl              | 25812.00         | POM121L1      | 1846.00        | 3.14         | 2.18         |
| 50023.00 | L18        | M-032261- alkB, alkylation repair l       | 121642.00        | ALKBH2        | 2562.00        | 4.84         | 0.48         |
| 50023.00 | L19        | M-012443- POM (POM121 homok               | 22932.00         | POMZP3        | 3874.00        | 1.70         | 3.62         |
| 50023.00 | L20        | M-015931- hypothetical protein N          | 196383.00        | MGC7036       | 3330.00        | 5.86         | 0.54         |
| 50023.00 | <b>L21</b> | <b>M-019821- POU domain, class 4, ti</b>  | <b>5458.00</b>   | <b>POU4F2</b> | <b>3787.00</b> | <b>9.08</b>  | <b>3.76</b>  |
| 50023.00 | L23        | M-019591- POU domain, class 5, ti         | 5460.00          | POU5F1        | 4703.00        | 5.12         | 0.20         |
| 50023.00 | M02        | M-006490- nitric oxide synthase 3         | 4846.00          | NOS3          | 2379.00        | 3.15         | 2.17         |
| 50023.00 | M04        | M-009496- nitric oxide synthase 1         | 4842.00          | NOS1          | 3079.00        | 5.23         | 0.09         |
| 50023.00 | M05        | M-012980- Nipped-B homolog (Dr            | 25836.00         | NIPBL         | 1449.00        | 1.93         | 3.39         |
| 50023.00 | M06        | M-020084- nucleolar protein 1, 12         | 4839.00          | NOL1          | 2668.00        | 2.77         | 2.55         |
| 50023.00 | M07        | M-011547- immediate early respo           | 8870.00          | IER3          | 3437.00        | 3.52         | 1.80         |
| 50023.00 | M08        | M-012059- noggin                          | 9241.00          | NOG           | 3872.00        | 7.18         | 1.86         |
| 50023.00 | M09        | M-006465- interferon, alpha-induc         | 3429.00          | IFI27         | 1566.00        | 3.83         | 1.49         |
| 50023.00 | M10        | M-009835- natural killer-tumor rec        | 4820.00          | NKTR          | 3638.00        | 11.60        | 6.28         |
| 50023.00 | M11        | M-016368- interferon-induced pro          | 10561.00         | IFI44         | 3171.00        | 3.60         | 1.72         |
| 50023.00 | M12        | M-016047- natural killer cell group       | 4818.00          | NKG7          | 2723.00        | 4.22         | 1.10         |
| 50023.00 | M13        | M-019616- interferon-induced pro          | 3434.00          | IFIT1         | 2301.00        | 6.08         | 0.76         |
| 50023.00 | M14        | M-015988- interleukin 32                  | 9235.00          | IL32          | 1709.00        | 1.93         | 3.39         |
| 50023.00 | M15        | M-012582- interferon-induced pro          | 3433.00          | IFIT2         | 2562.00        | 3.55         | 1.77         |
| 50023.00 | M16        | M-014037- chromosome 17 open              | 64149.00         | C17orf75      | 1876.00        | 2.67         | 2.65         |
| 50023.00 | M17        | M-017691- interferon-induced pro          | 3437.00          | IFIT3         | 4392.00        | 8.95         | 3.63         |
| 50023.00 | M18        | M-020555- nerve growth factor re          | 27018.00         | NGFRAP1       | 3424.00        | 7.01         | 1.69         |
| 50023.00 | M19        | M-020102- interferon-induced pro          | 24138.00         | IFIT5         | 3058.00        | 2.94         | 2.38         |
| 50023.00 | M20        | M-015648- nuclear factor related t        | 4798.00          | NFRKB         | 1728.00        | 6.37         | 1.05         |
| 50023.00 | M21        | M-020103- interferon induced tra          | 10581.00         | IFITM2        | 3003.00        | 4.93         | 0.39         |
| 50023.00 | M23        | M-014116- interferon induced tra          | 10410.00         | IFITM3        | 3515.00        | 1.62         | 3.70         |
| 50023.00 | N02        | M-008734- peptidase (mitochondr           | 23203.00         | PMPCA         | 2602.00        | 6.99         | 1.67         |
| 50023.00 | N04        | M-009654- rho/rac guanine nuclec          | 23370.00         | ARHGEF18      | 3153.00        | 6.22         | 0.90         |
| 50023.00 | N05        | M-026943- POU domain, class 6, ti         | 5463.00          | POU6F1        | 3124.00        | 6.02         | 0.70         |
| 50023.00 | N06        | M-026203- olfactory receptor, fam         | 158131.00        | OR1Q1         | 2309.00        | 4.20         | 1.12         |
| 50023.00 | N07        | M-012188- preferentially expresse         | 23532.00         | PRAME         | 2471.00        | 9.43         | 4.11         |
| 50023.00 | <b>N08</b> | <b>M-032254- v-myc myelocytomato:</b>     | <b>10408.00</b>  | <b>MYCNOS</b> | <b>3513.00</b> | <b>13.04</b> | <b>7.72</b>  |
| 50023.00 | N09        | M-019925- proline-rich protein Bst        | 5542.00          | PRB1          | 2593.00        | 1.85         | 3.47         |
| 50023.00 | N10        | M-010363- jumonji domain contai           | 23210.00         | JMJD6         | 2056.00        | 9.63         | 4.31         |
| 50023.00 | N11        | M-016647- peroxisome proliferatc          | 23082.00         | PPRC1         | 3094.00        | 4.52         | 0.80         |
| 50023.00 | <b>N12</b> | <b>M-017157- pre T-cell antigen recej</b> | <b>171558.00</b> | <b>PTCRA</b>  | <b>1595.00</b> | <b>17.68</b> | <b>12.36</b> |
| 50023.00 | N13        | M-019491- protein regulator of cy         | 9055.00          | PRC1          | 2554.00        | 8.26         | 2.94         |
| 50023.00 | N14        | M-003528- polypyrimidine tract bi         | 5725.00          | PTBP1         | 2345.00        | 2.56         | 2.76         |
| 50023.00 | N15        | M-015816- papillary renal cell carc       | 5546.00          | PRCC          | 2510.00        | 5.42         | 0.10         |
| 50023.00 | N16        | M-016779- proline-serine-threonir         | 9050.00          | PSTPIP2       | 3415.00        | 12.01        | <b>6.69</b>  |
| 50023.00 | N17        | M-020712- PR domain containing            | 56981.00         | PRDM11        | 2862.00        | 0.77         | 4.55         |
| 50023.00 | N18        | M-016239- proline-serine-threonir         | 9051.00          | PSTPIP1       | 2639.00        | 6.37         | 1.05         |
| 50023.00 | N19        | M-007040- PR domain containing            | 59336.00         | PRDM13        | 1302.00        | 2.15         | 3.17         |
| 50023.00 | N20        | M-017583- proteasome (prosome)            | 5714.00          | PSMD8         | 540.00         | 4.26         | 1.06         |
| 50023.00 | N21        | M-024425- PR domain containing            | 93166.00         | PRDM6         | 4656.00        | 6.27         | 0.95         |
| 50023.00 | N23        | M-020669- PR domain containing            | 56978.00         | PRDM8         | 2011.00        | 3.08         | 2.24         |
| 50023.00 | O02        | M-012001- nuclear factor of kappa         | 4795.00          | NFKBIL1       | 2416.00        | 6.83         | 1.51         |

|              |                                    |           |          |         |       |      |
|--------------|------------------------------------|-----------|----------|---------|-------|------|
| 50023.00 O04 | M-004766- nuclear factor of kappa  | 4794.00   | NFKBIE   | 2164.00 | 10.07 | 4.75 |
| 50023.00 O05 | M-012712- interferon, alpha 1      | 3439.00   | IFNA1    | 2169.00 | 4.24  | 1.08 |
| 50023.00 O06 | M-003915- neuroepithelial cell tra | 10276.00  | NET1     | 2122.00 | 5.28  | 0.04 |
| 50023.00 O07 | M-012713- interferon gamma rece    | 3460.00   | IFNGR2   | 2945.00 | 5.57  | 0.25 |
| 50023.00 O08 | M-008327- nei endonuclease VIII-l  | 79661.00  | NEIL1    | 2750.00 | 6.04  | 0.72 |
| 50023.00 O09 | M-019615- interferon-related devi  | 3475.00   | IFRD1    | 3233.00 | 6.93  | 1.61 |
| 50023.00 O10 | M-020082- neurofilament, light pc  | 4747.00   | NEFL     | 3246.00 | 4.04  | 1.28 |
| 50023.00 O11 | M-013748- receptor (chemosenso     | 64108.00  | RTP4     | 2960.00 | 3.85  | 1.47 |
| 50023.00 O12 | M-019600- NADH dehydrogenase       | 4728.00   | NDUFS8   | 3640.00 | 7.94  | 2.62 |
| 50023.00 O13 | M-021110- insulin-like growth fact | 51214.00  | IGF2AS   | 2777.00 | 2.52  | 2.80 |
| 50023.00 O14 | M-019816- NADH dehydrogenase       | 4725.00   | NDUFS5   | 2372.00 | 5.06  | 0.26 |
| 50023.00 O15 | M-010601- insulin-like growth fact | 3482.00   | IGF2R    | 2049.00 | 3.22  | 2.10 |
| 50023.00 O16 | M-013861- NDRG family member       | 65009.00  | NDRG4    | 2322.00 | 4.69  | 0.63 |
| 50023.00 O17 | M-032276- immunoglobulin heavy     | 3502.00   | IGHG3    | 2839.00 | 2.85  | 2.47 |
| 50023.00 O18 | M-013761- family with sequence s   | 54537.00  | FAM35A   | 1832.00 | 7.75  | 2.43 |
| 50023.00 O19 | M-016551- hypothetical protein N   | 92806.00  | MGC16385 | 3451.00 | 6.09  | 0.77 |
| 50023.00 O20 | M-018569- hypothetical protein N   | 348035.00 | MGC40069 | 2859.00 | 1.43  | 3.89 |
| 50023.00 O21 | M-003438- retinoic acid receptor,  | 5915.00   | RARB     | 2775.00 | 1.41  | 3.91 |
| 50023.00 O23 | M-008585- xanthine dehydrogena     | 7498.00   | XDH      | 2223.00 | 1.89  | 3.43 |
| 50023.00 P02 | M-009621- proteasome (prosome,     | 5713.00   | PSMD7    | 1083.00 | 2.31  | 3.01 |
| 50023.00 P04 | M-012006- proteasome (prosome,     | 5711.00   | PSMD5    | 2298.00 | 2.57  | 2.75 |
| 50023.00 P05 | M-019692- serglycin                | 5552.00   | SRGN     | 2411.00 | 3.07  | 2.25 |
| 50023.00 P06 | M-011365- proteasome (prosome,     | 5710.00   | PSMD4    | 2188.00 | 9.64  | 4.32 |
| 50023.00 P07 | M-012129- proteoglycan 4           | 10216.00  | PRG4     | 2137.00 | 3.70  | 1.62 |
| 50023.00 P08 | M-006024- proteasome (prosome,     | 10213.00  | PSMD14   | 1109.00 | 3.25  | 2.07 |
| 50023.00 P09 | M-007675- protein kinase, AMP-ac   | 5564.00   | PRKAB1   | 2197.00 | 5.10  | 0.22 |
| 50023.00 P10 | M-011757- proteasome (prosome,     | 5683.00   | PSMA2    | 1249.00 | 6.41  | 1.09 |
| 50023.00 P11 | M-007672- protein kinase, AMP-ac   | 5565.00   | PRKAB2   | 2179.00 | 1.70  | 3.62 |
| 50023.00 P12 | M-006018- presenilin 2 (Alzheimer  | 5664.00   | PSEN2    | 2228.00 | 6.82  | 1.50 |
| 50023.00 P13 | M-009693- protein kinase, AMP-ac   | 51422.00  | PRKAG2   | 3144.00 | 7.63  | 2.31 |
| 50023.00 P14 | M-013688- pleckstrin homology, S   | 27128.00  | PSCD4    | 1827.00 | 4.21  | 1.11 |
| 50023.00 P15 | M-017354- zinc finger, MYND-type   | 23613.00  | ZMYND8   | 3791.00 | 8.26  | 2.94 |
| 50023.00 P16 | M-020525- PRP31 pre-mRNA proc      | 26121.00  | PRPF31   | 1816.00 | 10.68 | 5.36 |
| 50023.00 P17 | M-016416- protein kinase C, delta  | 112464.00 | PRKCDBP  | 2434.00 | 5.09  | 0.23 |
| 50023.00 P18 | M-016913- prospero-related hom     | 5629.00   | PROX1    | 2602.00 | 4.96  | 0.36 |
| 50023.00 P19 | M-019271- prion protein 2 (dublet  | 23627.00  | PRND     | 2026.00 | 3.21  | 2.11 |
| 50023.00 P20 | M-010630- prominin 1               | 8842.00   | PROM1    | 1360.00 | 10.00 | 4.68 |
| 50023.00 P21 | M-011101- prion protein (p27-30)   | 5621.00   | PRNP     | 1411.00 | 3.76  | 1.56 |
| 50023.00 P23 | M-017603- ATPase family, AAA do    | 29028.00  | ATAD2    | 1729.00 | 2.49  | 2.83 |
|              |                                    |           | mdn      | 2916.00 | 5.32  | 2.19 |
|              |                                    |           | 3MAD     |         |       | 6.57 |
|              |                                    |           | MADc     |         |       | 3.24 |
| 50023.00 C22 | 2.81                               | 3574.00   | 18.91    |         |       |      |
| 50023.00 D22 |                                    |           |          | 3813.00 | 38.42 |      |
| 50023.00 E22 |                                    |           |          | 3668.00 | 34.79 |      |
| 50023.00 F22 |                                    |           |          | 3223.00 | 35.93 |      |
|              |                                    |           | mn       | 3568.00 | 36.38 |      |

|              |        |       |           |         |       |
|--------------|--------|-------|-----------|---------|-------|
|              |        |       | sd        | 307.45  | 1.86  |
| 50023.00 G22 |        |       |           | 2649.00 | 8.68  |
| 50023.00 H22 |        |       |           | 2154.00 | 4.13  |
| 50023.00 I22 | 431.00 | 81.90 |           |         |       |
| 50023.00 J22 |        |       |           | 1253.00 | 3.43  |
|              |        |       | mn        | 2018.67 | 5.42  |
|              |        |       | sd        | 707.77  | 2.85  |
|              |        |       | 3psSD     |         | 5.57  |
|              |        |       | 3ngSD     |         | 8.55  |
|              |        |       | SumSD     |         | 14.13 |
|              |        |       | DiffMn    |         | 30.96 |
|              |        |       | SmovrDiff |         | 0.46  |
|              |        |       | 1minus    |         | 0.54  |

| rZ    | Cell Coun | % inf | Abs Dev | rZ    | Cell Count | % inf | Abs Dev | rZ     |
|-------|-----------|-------|---------|-------|------------|-------|---------|--------|
| -1.00 | 1078.00   | 4.45  | 1.42    | 0.67  | 1103.00    | 7.52  | 3.69    | 1.56   |
| -0.97 | 2650.00   | 3.25  | 0.22    | 0.10  | 2160.00    | 4.49  | 0.66    | 0.28   |
| -0.60 | 1618.00   | 2.29  | 0.74    | -0.35 | 2520.00    | 3.10  | 0.73    | -0.31  |
| -0.51 | 2430.00   | 3.50  | 0.47    | 0.22  | 3370.00    | 4.96  | 1.13    | 0.48   |
| -0.05 | 1910.00   | 2.41  | 0.62    | -0.29 | 3604.00    | 3.69  | 0.14    | -0.06  |
| -1.08 | 1951.00   | 4.10  | 1.07    | 0.50  | 2977.00    | 3.53  | 0.30    | -0.13  |
| 0.33  | 1833.00   | 3.55  | 0.52    | 0.24  | 3371.00    | 10.35 | 6.52    | 2.76   |
| 0.00  | 2017.00   | 7.19  | 4.16    | 1.96  | 2528.00    | 7.52  | 3.69    | 1.56   |
| -0.62 | 1782.00   | 2.36  | 0.67    | -0.31 | 2503.00    | 6.31  | 2.48    | 1.05   |
| -0.57 | 1700.00   | 3.71  | 0.68    | 0.32  | 4412.00    | 12.29 | 8.46    | 3.58   |
| -0.11 | 1626.00   | 4.61  | 1.58    | 0.75  | 2865.00    | 9.91  | 6.08    | 2.57   |
| -0.99 | 2018.00   | 1.49  | 1.54    | -0.72 | 2916.00    | 4.70  | 0.87    | 0.37   |
| -0.53 | 1920.00   | 5.73  | 2.70    | 1.27  | 3539.00    | 5.20  | 1.37    | 0.58   |
| -0.68 | 3520.00   | 3.44  | 0.41    | 0.19  | 4783.00    | 3.39  | 0.44    | -0.19  |
| -1.01 | 1394.00   | 4.16  | 1.13    | 0.53  | 3123.00    | 3.94  | 0.11    | 0.05   |
| 0.41  | 1366.00   | 2.12  | 0.91    | -0.42 | 3416.00    | 11.77 | 7.94    | 3.36   |
| 2.54  | 1208.00   | 8.94  | 5.91    | 2.78  | 1555.00    | 18.33 | 14.50   | 6.13 y |
| -0.01 | 966.00    | 2.80  | 0.24    | -0.11 | 2236.00    | 3.04  | 0.79    | -0.33  |
| 0.62  | 1900.00   | 4.95  | 1.92    | 0.90  | 3792.00    | 7.30  | 3.47    | 1.47   |
| -0.83 | 1280.00   | 2.27  | 0.76    | -0.36 | 1749.00    | 5.15  | 1.32    | 0.56   |
| -1.47 | 2156.00   | 0.42  | 2.61    | -1.23 | 4757.00    | 1.77  | 2.06    | -0.87  |
| 0.79  | 2679.00   | 2.65  | 0.38    | -0.18 | 5901.00    | 5.58  | 1.75    | 0.74   |
| -0.19 | 4328.00   | 5.45  | 2.42    | 1.14  | 6163.00    | 5.03  | 1.20    | 0.51   |
| -1.01 | 2272.00   | 2.82  | 0.21    | -0.10 | 4597.00    | 3.05  | 0.78    | -0.33  |
| 0.41  | 1768.00   | 1.02  | 2.01    | -0.94 | 4860.00    | 1.77  | 2.06    | -0.87  |
| -0.51 | 986.00    | 2.74  | 0.29    | -0.13 | 3242.00    | 3.42  | 0.41    | -0.17  |
| -0.33 | 2387.00   | 2.30  | 0.73    | -0.34 | 5168.00    | 1.59  | 2.24    | -0.95  |
| -0.70 | 2311.00   | 1.51  | 1.52    | -0.71 | 4534.00    | 4.48  | 0.65    | 0.27   |
| -0.58 | 2335.00   | 2.10  | 0.93    | -0.44 | 4751.00    | 3.20  | 0.63    | -0.27  |
| -1.27 | 986.00    | 1.32  | 1.71    | -0.80 | 1171.00    | 0.43  | 3.40    | -1.44  |
| 1.62  | 2380.00   | 5.92  | 2.89    | 1.36  | 3455.00    | 6.51  | 2.68    | 1.13   |
| -1.22 | 1559.00   | 2.05  | 0.98    | -0.46 | 4140.00    | 0.85  | 2.98    | -1.26  |
| 0.04  | 2121.00   | 1.60  | 1.43    | -0.67 | 4150.00    | 2.24  | 1.59    | -0.67  |
| -0.89 | 1770.00   | 1.19  | 1.84    | -0.86 | 4162.00    | 2.28  | 1.55    | -0.65  |
| -0.84 | 835.00    | 0.72  | 2.31    | -1.08 | 3029.00    | 1.22  | 2.61    | -1.10  |
| -1.13 | 2084.00   | 0.48  | 2.55    | -1.20 | 5227.00    | 0.92  | 2.91    | -1.23  |
| 0.46  | 2352.00   | 2.04  | 0.99    | -0.46 | 4903.00    | 3.20  | 0.63    | -0.27  |
| -0.83 | 1841.00   | 1.74  | 1.29    | -0.60 | 4185.00    | 2.41  | 1.42    | -0.60  |
| -0.98 | 2552.00   | 3.17  | 0.14    | 0.07  | 4915.00    | 1.73  | 2.10    | -0.89  |
| -0.27 | 2525.00   | 2.02  | 1.01    | -0.47 | 5177.00    | 2.30  | 1.53    | -0.65  |
| -0.28 | 3403.00   | 1.68  | 1.36    | -0.63 | 4205.00    | 3.59  | 0.24    | -0.10  |
| -1.45 | 3371.00   | 1.31  | 1.72    | -0.81 | 3839.00    | 0.39  | 3.44    | -1.45  |
| -0.27 | 2233.00   | 2.37  | 0.66    | -0.31 | 3526.00    | 1.90  | 1.93    | -0.82  |
| 0.27  | 2390.00   | 1.72  | 1.31    | -0.62 | 2959.00    | 1.66  | 2.17    | -0.92  |
| -0.26 | 2751.00   | 0.58  | 2.45    | -1.15 | 3966.00    | 2.07  | 1.76    | -0.75  |
| 0.24  | 1987.00   | 1.86  | 1.17    | -0.55 | 3397.00    | 3.77  | 0.06    | -0.03  |

|       |         |       |       |       |         |       |      |        |
|-------|---------|-------|-------|-------|---------|-------|------|--------|
| -0.72 | 2043.00 | 0.59  | 2.44  | -1.15 | 3718.00 | 1.80  | 2.03 | -0.86  |
| -1.36 | 874.00  | 0.80  | 2.23  | -1.05 | 1579.00 | 0.95  | 2.88 | -1.22  |
| -0.13 | 1771.00 | 0.68  | 2.35  | -1.10 | 2595.00 | 1.23  | 2.60 | -1.10  |
| 0.06  | 2214.00 | 0.81  | 2.22  | -1.04 | 2895.00 | 3.42  | 0.41 | -0.17  |
| -0.37 | 996.00  | 1.51  | 1.52  | -0.71 | 2373.00 | 3.75  | 0.08 | -0.03  |
| 0.94  | 2333.00 | 2.40  | 0.63  | -0.29 | 4371.00 | 4.53  | 0.70 | 0.30   |
| -0.61 | 1488.00 | 0.60  | 2.43  | -1.14 | 4040.00 | 1.56  | 2.27 | -0.96  |
| -1.07 | 1544.00 | 0.58  | 2.45  | -1.15 | 3568.00 | 1.18  | 2.65 | -1.12  |
| -1.13 | 1188.00 | 1.26  | 1.77  | -0.83 | 2637.00 | 1.06  | 2.77 | -1.17  |
| 0.88  | 830.00  | 2.77  | 0.26  | -0.12 | 2937.00 | 4.46  | 0.63 | 0.27   |
| -0.37 | 531.00  | 3.20  | 0.17  | 0.08  | 1600.00 | 3.38  | 0.46 | -0.19  |
| -0.69 | 1803.00 | 0.67  | 2.36  | -1.11 | 2863.00 | 4.44  | 0.61 | 0.26   |
| -1.07 | 1664.00 | 0.60  | 2.43  | -1.14 | 3682.00 | 0.76  | 3.07 | -1.30  |
| -1.21 | 1796.00 | 0.89  | 2.14  | -1.00 | 3344.00 | 2.27  | 1.56 | -0.66  |
| -1.47 | 2983.00 | 0.91  | 2.12  | -1.00 | 3882.00 | 2.40  | 1.43 | -0.61  |
| -0.35 | 2471.00 | 2.55  | 0.48  | -0.22 | 3814.00 | 2.25  | 1.58 | -0.67  |
| -0.10 | 3383.00 | 4.85  | 1.82  | 0.86  | 4952.00 | 2.71  | 1.12 | -0.48  |
| -0.04 | 2642.00 | 2.65  | 0.38  | -0.18 | 4869.00 | 4.79  | 0.96 | 0.40   |
| 0.90  | 1497.00 | 4.41  | 1.38  | 0.65  | 3169.00 | 5.84  | 2.01 | 0.85   |
| 1.21  | 2292.00 | 2.71  | 0.32  | -0.15 | 3692.00 | 3.79  | 0.04 | -0.02  |
| 1.23  | 2098.00 | 2.34  | 0.69  | -0.32 | 4181.00 | 4.52  | 0.69 | 0.29   |
| 0.05  | 1971.00 | 3.20  | 0.17  | 0.08  | 4143.00 | 2.73  | 1.10 | -0.47  |
| -0.87 | 1476.00 | 0.75  | 2.28  | -1.07 | 3063.00 | 2.35  | 1.48 | -0.63  |
| 1.30  | 2713.00 | 5.68  | 2.65  | 1.25  | 4292.00 | 3.80  | 0.03 | -0.01  |
| 2.09  | 2339.00 | 5.43  | 2.40  | 1.13  | 2940.00 | 3.20  | 0.63 | -0.27  |
| 0.00  | 2223.00 | 2.61  | 0.42  | -0.20 | 3678.00 | 2.91  | 0.92 | -0.39  |
| -0.75 | 1801.00 | 0.50  | 2.53  | -1.19 | 4806.00 | 1.77  | 2.06 | -0.87  |
| -0.39 | 2315.00 | 3.15  | 0.12  | 0.06  | 4193.00 | 1.50  | 2.33 | -0.98  |
| 0.26  | 1411.00 | 4.18  | 1.15  | 0.54  | 3311.00 | 3.17  | 0.66 | -0.28  |
| 0.59  | 1984.00 | 7.61  | 4.58  | 2.15  | 4858.00 | 4.26  | 0.43 | 0.18   |
| 2.49  | 2740.00 | 5.69  | 2.66  | 1.25  | 5286.00 | 3.41  | 0.42 | -0.18  |
| -0.91 | 1808.00 | 0.83  | 2.20  | -1.03 | 3671.00 | 0.54  | 3.29 | -1.39  |
| 5.05  | 4844.00 | 7.54  | 4.51  | 2.12  | 6833.00 | 8.84  | 5.01 | 2.12 y |
| -0.46 | 2713.00 | 0.88  | 2.15  | -1.01 | 4718.00 | 0.72  | 3.11 | -1.31  |
| 0.16  | 1857.00 | 3.28  | 0.25  | 0.12  | 2826.00 | 3.57  | 0.26 | -0.11  |
| 0.78  | 2268.00 | 4.45  | 1.42  | 0.67  | 3456.00 | 2.08  | 1.75 | -0.74  |
| 8.51  | 3657.00 | 15.72 | 12.69 | 5.96  | 4398.00 | 12.62 | 8.79 | 3.72 y |
| 0.25  | 1765.00 | 0.28  | 2.75  | -1.29 | 2532.00 | 1.78  | 2.05 | -0.87  |
| 0.57  | 1482.00 | 1.08  | 1.95  | -0.91 | 2508.00 | 3.15  | 0.68 | -0.29  |
| -1.09 | 2553.00 | 0.78  | 2.25  | -1.05 | 2908.00 | 1.03  | 2.80 | -1.18  |
| 0.44  | 1094.00 | 0.27  | 2.76  | -1.29 | 2320.00 | 1.98  | 1.85 | -0.78  |
| -0.43 | 1187.00 | 1.77  | 1.26  | -0.59 | 1973.00 | 2.18  | 1.65 | -0.70  |
| 1.76  | 1536.00 | 4.62  | 1.59  | 0.75  | 2618.00 | 3.32  | 0.51 | -0.21  |
| -0.37 | 880.00  | 0.00  | 3.03  | -1.42 | 2377.00 | 0.84  | 2.99 | -1.26  |
| 1.35  | 2721.00 | 1.40  | 1.63  | -0.77 | 3122.00 | 2.31  | 1.52 | -0.64  |
| 6.24  | 2063.00 | 2.23  | 0.80  | -0.37 | 3420.00 | 6.70  | 2.87 | 1.21   |
| 5.14  | 3621.00 | 7.68  | 4.65  | 2.19  | 4203.00 | 5.42  | 1.59 | 0.67 y |

|       |         |       |       |       |         |       |      |         |
|-------|---------|-------|-------|-------|---------|-------|------|---------|
| 0.61  | 1849.00 | 2.16  | 0.87  | -0.41 | 4230.00 | 4.63  | 0.80 | 0.34    |
| -0.12 | 2700.00 | 2.22  | 0.81  | -0.38 | 4045.00 | 2.23  | 1.61 | -0.68   |
| 0.23  | 616.00  | 0.16  | 2.87  | -1.34 | 2515.00 | 0.99  | 2.84 | -1.20   |
| 0.67  | 2763.00 | 1.05  | 1.98  | -0.93 | 5110.00 | 3.11  | 0.72 | -0.30   |
| 3.95  | 2840.00 | 3.63  | 0.60  | 0.28  | 3970.00 | 5.44  | 1.61 | 0.68    |
| 1.50  | 3236.00 | 1.55  | 1.48  | -0.70 | 5105.00 | 8.07  | 4.24 | 1.79    |
| 1.93  | 3593.00 | 1.42  | 1.61  | -0.75 | 4735.00 | 4.20  | 0.37 | 0.16    |
| -0.54 | 2572.00 | 0.47  | 2.56  | -1.20 | 4437.00 | 3.36  | 0.47 | -0.20   |
| 0.09  | 1460.00 | 22.67 | 19.64 | 9.23  | 3426.00 | 6.01  | 2.18 | 0.92    |
| 0.08  | 2806.00 | 2.21  | 0.82  | -0.38 | 5154.00 | 4.31  | 0.48 | 0.20    |
| 0.58  | 1728.00 | 8.10  | 5.07  | 2.38  | 3351.00 | 5.19  | 1.36 | 0.58    |
| 2.19  | 1425.00 | 5.26  | 2.23  | 1.05  | 3997.00 | 5.93  | 2.10 | 0.89    |
| 0.98  | 1995.00 | 2.81  | 0.22  | -0.10 | 4035.00 | 4.63  | 0.80 | 0.34    |
| 1.99  | 2644.00 | 7.26  | 4.23  | 1.99  | 5244.00 | 7.69  | 3.86 | 1.63    |
| -0.12 | 1871.00 | 2.30  | 0.73  | -0.34 | 4887.00 | 4.07  | 0.24 | 0.10    |
| -0.58 | 1929.00 | 1.40  | 1.63  | -0.76 | 3313.00 | 2.32  | 1.51 | -0.64   |
| 0.25  | 1545.00 | 6.47  | 3.44  | 1.62  | 3647.00 | 5.95  | 2.12 | 0.90    |
| 2.45  | 2117.00 | 6.57  | 3.54  | 1.66  | 3674.00 | 9.06  | 5.23 | 2.21 y  |
| 0.06  | 1095.00 | 8.22  | 5.19  | 2.44  | 3044.00 | 4.57  | 0.74 | 0.31    |
| 0.06  | 2091.00 | 2.58  | 0.45  | -0.21 | 3193.00 | 1.66  | 2.17 | -0.92   |
| 1.58  | 1338.00 | 3.74  | 0.71  | 0.33  | 3322.00 | 3.25  | 0.58 | -0.24   |
| -0.44 | 2715.00 | 5.08  | 2.05  | 0.97  | 5813.00 | 4.03  | 0.20 | 0.08    |
| 2.73  | 2211.00 | 5.38  | 2.35  | 1.11  | 3639.00 | 3.96  | 0.13 | 0.05    |
| 4.02  | 2843.00 | 3.38  | 0.35  | 0.16  | 5644.00 | 9.48  | 5.65 | 2.39 y  |
| 0.47  | 2261.00 | 2.48  | 0.55  | -0.26 | 4088.00 | 3.62  | 0.21 | -0.09   |
| 1.35  | 3920.00 | 4.80  | 1.77  | 0.83  | 5989.00 | 3.51  | 0.32 | -0.14   |
| -0.59 | 3337.00 | 2.49  | 0.54  | -0.25 | 4524.00 | 3.76  | 0.07 | -0.03   |
| -0.97 | 1898.00 | 4.22  | 1.19  | 0.56  | 3725.00 | 2.01  | 1.82 | -0.77   |
| -0.77 | 2103.00 | 4.95  | 1.92  | 0.90  | 3514.00 | 4.24  | 0.41 | 0.17    |
| -0.41 | 1150.00 | 7.57  | 4.54  | 2.13  | 2775.00 | 6.09  | 2.26 | 0.96    |
| -0.40 | 1881.00 | 3.56  | 0.53  | 0.25  | 3060.00 | 4.28  | 0.45 | 0.19    |
| -0.66 | 1682.00 | 2.97  | 0.06  | -0.02 | 2437.00 | 3.69  | 0.14 | -0.06   |
| 2.65  | 2003.00 | 10.43 | 7.40  | 3.48  | 3635.00 | 12.63 | 8.80 | 3.72 y  |
| -0.18 | 1047.00 | 5.83  | 2.80  | 1.32  | 2705.00 | 3.59  | 0.24 | -0.10   |
| 0.07  | 390.00  | 3.08  | 0.05  | 0.02  | 1014.00 | 5.33  | 1.50 | 0.63    |
| -0.21 | 2116.00 | 8.79  | 5.76  | 2.71  | 3695.00 | 6.22  | 2.39 | 1.01    |
| -0.15 | 1585.00 | 4.16  | 1.13  | 0.53  | 2859.00 | 3.95  | 0.12 | 0.05    |
| 3.41  | 2240.00 | 2.95  | 0.08  | -0.04 | 2698.00 | 6.89  | 3.06 | 1.30    |
| 2.43  | 1108.00 | 8.03  | 5.00  | 2.35  | 2200.00 | 3.45  | 0.38 | -0.16 x |
| -0.45 | 2877.00 | 2.26  | 0.77  | -0.36 | 3560.00 | 2.47  | 1.36 | -0.57   |
| 0.07  | 2617.00 | 7.87  | 4.84  | 2.28  | 3624.00 | 9.60  | 5.77 | 2.44 y  |
| 1.49  | 2523.00 | 4.80  | 1.77  | 0.83  | 3917.00 | 8.63  | 4.80 | 2.03    |
| 3.23  | 3689.00 | 7.83  | 4.80  | 2.26  | 5377.00 | 8.98  | 5.15 | 2.18 y  |
| 1.45  | 4010.00 | 9.98  | 6.95  | 3.26  | 4995.00 | 7.49  | 3.66 | 1.55    |
| 0.60  | 2845.00 | 7.03  | 4.00  | 1.88  | 3473.00 | 11.09 | 7.26 | 3.07    |
| -0.13 | 2426.00 | 0.91  | 2.12  | -1.00 | 3760.00 | 1.28  | 2.55 | -1.08   |
| -1.19 | 1343.00 | 1.71  | 1.32  | -0.62 | 2180.00 | 0.69  | 3.14 | -1.33   |



|       |         |       |      |       |         |       |      |        |
|-------|---------|-------|------|-------|---------|-------|------|--------|
| -1.12 | 2160.00 | 0.69  | 2.34 | -1.10 | 3904.00 | 4.43  | 0.60 | 0.25   |
| 0.14  | 3175.00 | 2.30  | 0.73 | -0.34 | 3582.00 | 5.19  | 1.36 | 0.58   |
| 0.06  | 3401.00 | 2.56  | 0.47 | -0.22 | 3533.00 | 5.75  | 1.92 | 0.81   |
| 3.40  | 3653.00 | 7.56  | 4.53 | 2.13  | 3418.00 | 10.47 | 6.64 | 2.81 y |
| 4.12  | 2854.00 | 9.85  | 6.82 | 3.20  | 3812.00 | 12.46 | 8.63 | 3.65 y |
| 0.84  | 3247.00 | 8.44  | 5.41 | 2.54  | 3450.00 | 8.03  | 4.20 | 1.78   |
| -0.83 | 2982.00 | 1.84  | 1.19 | -0.55 | 3517.00 | 2.36  | 1.47 | -0.62  |
| -0.47 | 2756.00 | 1.92  | 1.11 | -0.52 | 3811.00 | 1.63  | 2.20 | -0.93  |
| 0.45  | 2739.00 | 3.65  | 0.62 | 0.29  | 3287.00 | 2.59  | 1.24 | -0.53  |
| -0.60 | 1552.00 | 0.64  | 2.39 | -1.12 | 1541.00 | 1.82  | 2.01 | -0.85  |
| -0.68 | 2364.00 | 0.59  | 2.44 | -1.14 | 2566.00 | 2.81  | 1.02 | -0.43  |
| 0.25  | 1097.00 | 0.82  | 2.21 | -1.04 | 2241.00 | 1.07  | 2.76 | -1.17  |
| 2.52  | 3018.00 | 4.94  | 1.91 | 0.90  | 2647.00 | 5.36  | 1.53 | 0.65   |
| 1.66  | 3704.00 | 5.83  | 2.80 | 1.32  | 4311.00 | 6.84  | 3.01 | 1.27   |
| 0.72  | 3515.00 | 1.19  | 1.84 | -0.86 | 4702.00 | 4.62  | 0.79 | 0.33   |
| 0.66  | 2524.00 | 4.12  | 1.09 | 0.51  | 3367.00 | 3.33  | 0.50 | -0.21  |
| 0.87  | 2917.00 | 1.92  | 1.11 | -0.52 | 4060.00 | 2.98  | 0.85 | -0.36  |
| -0.53 | 1666.00 | 1.44  | 1.59 | -0.74 | 3913.00 | 3.71  | 0.12 | -0.05  |
| -0.79 | 1769.00 | 0.17  | 2.86 | -1.34 | 4551.00 | 1.76  | 2.07 | -0.88  |
| -0.27 | 3983.00 | 2.08  | 0.95 | -0.44 | 5569.00 | 5.98  | 2.15 | 0.91   |
| -1.08 | 3526.00 | 1.62  | 1.41 | -0.66 | 3640.00 | 3.02  | 0.81 | -0.34  |
| -1.27 | 2231.00 | 1.66  | 1.37 | -0.64 | 2037.00 | 5.55  | 1.72 | 0.73   |
| 1.37  | 3362.00 | 6.60  | 3.57 | 1.68  | 4011.00 | 10.27 | 6.44 | 2.72   |
| 0.32  | 1711.00 | 3.86  | 0.83 | 0.39  | 2221.00 | 2.39  | 1.44 | -0.61  |
| -0.82 | 2645.00 | 1.93  | 1.10 | -0.52 | 2677.00 | 2.69  | 1.14 | -0.48  |
| -0.35 | 2937.00 | 3.00  | 0.03 | -0.01 | 2274.00 | 2.07  | 1.76 | -0.75  |
| 0.27  | 3320.00 | 1.84  | 1.19 | -0.56 | 1935.00 | 2.33  | 1.50 | -0.64  |
| -0.93 | 1496.00 | 0.27  | 2.76 | -1.30 | 1320.00 | 2.73  | 1.10 | -0.47  |
| 0.57  | 2134.00 | 1.87  | 1.16 | -0.54 | 2187.00 | 2.01  | 1.82 | -0.77  |
| 0.42  | 3261.00 | 3.68  | 0.65 | 0.31  | 3233.00 | 5.47  | 1.64 | 0.70   |
| 1.65  | 2754.00 | 4.76  | 1.73 | 0.81  | 3115.00 | 4.46  | 0.63 | 0.27   |
| 0.13  | 2387.00 | 2.01  | 1.02 | -0.48 | 1851.00 | 2.86  | 0.97 | -0.41  |
| 0.78  | 2277.00 | 3.21  | 0.18 | 0.08  | 2138.00 | 4.21  | 0.38 | 0.16   |
| -0.79 | 1512.00 | 0.60  | 2.43 | -1.14 | 1989.00 | 4.58  | 0.75 | 0.32   |
| 1.27  | 1307.00 | 1.22  | 1.81 | -0.85 | 2252.00 | 6.88  | 3.05 | 1.29   |
| 1.66  | 2067.00 | 2.71  | 0.32 | -0.15 | 3325.00 | 10.74 | 6.91 | 2.92   |
| 1.81  | 1511.00 | 4.17  | 1.14 | 0.54  | 1742.00 | 6.54  | 2.71 | 1.15   |
| 2.69  | 2978.00 | 5.74  | 2.71 | 1.28  | 3702.00 | 13.32 | 9.49 | 4.01 x |
| 3.33  | 2601.00 | 2.81  | 0.22 | -0.10 | 2785.00 | 13.54 | 9.71 | 4.10 x |
| 0.28  | 2216.00 | 1.35  | 1.68 | -0.79 | 2121.00 | 5.80  | 1.97 | 0.83   |
| 0.14  | 2853.00 | 3.08  | 0.05 | 0.03  | 4936.00 | 6.18  | 2.35 | 0.99   |
| 1.59  | 3843.00 | 2.89  | 0.14 | -0.06 | 4989.00 | 12.97 | 9.14 | 3.86   |
| -0.61 | 3044.00 | 1.38  | 1.65 | -0.77 | 4008.00 | 2.69  | 1.14 | -0.48  |
| -0.75 | 4094.00 | 4.10  | 1.07 | 0.51  | 4175.00 | 2.59  | 1.24 | -0.53  |
| 1.61  | 3932.00 | 5.93  | 2.90 | 1.36  | 5077.00 | 7.90  | 4.07 | 1.72   |
| 4.22  | 4831.00 | 10.35 | 7.32 | 3.44  | 5250.00 | 12.48 | 8.65 | 3.66 y |
| 1.37  | 3428.00 | 7.15  | 4.12 | 1.94  | 3766.00 | 6.00  | 2.17 | 0.92   |



|       |         |       |      |       |         |       |       |        |
|-------|---------|-------|------|-------|---------|-------|-------|--------|
| 0.69  | 2976.00 | 3.29  | 0.26 | 0.13  | 3811.00 | 8.29  | 4.46  | 1.89   |
| 0.33  | 3165.00 | 1.86  | 1.17 | -0.55 | 3638.00 | 2.91  | 0.92  | -0.39  |
| -0.04 | 3305.00 | 2.63  | 0.40 | -0.18 | 4112.00 | 5.01  | 1.18  | 0.50   |
| 1.18  | 3305.00 | 2.00  | 1.03 | -0.48 | 3714.00 | 4.93  | 1.10  | 0.46   |
| -0.63 | 1749.00 | 1.26  | 1.77 | -0.83 | 2301.00 | 2.91  | 0.92  | -0.39  |
| 0.53  | 3225.00 | 3.69  | 0.66 | 0.31  | 2953.00 | 3.39  | 0.44  | -0.19  |
| 2.34  | 3575.00 | 10.15 | 7.12 | 3.35  | 3457.00 | 7.09  | 3.26  | 1.38 y |
| 0.69  | 2598.00 | 8.70  | 5.67 | 2.66  | 3615.00 | 6.31  | 2.48  | 1.05   |
| 0.07  | 1693.00 | 3.07  | 0.04 | 0.02  | 2268.00 | 3.88  | 0.05  | 0.02   |
| 1.12  | 3917.00 | 9.85  | 6.82 | 3.21  | 4649.00 | 13.92 | 10.09 | 4.27 y |
| -1.33 | 3272.00 | 1.99  | 1.04 | -0.49 | 3305.00 | 2.97  | 0.86  | -0.37  |
| 0.66  | 2611.00 | 2.91  | 0.12 | -0.05 | 3316.00 | 4.89  | 1.06  | 0.45   |
| 1.93  | 2669.00 | 6.26  | 3.23 | 1.52  | 3797.00 | 5.08  | 1.25  | 0.53   |
| -0.64 | 3583.00 | 1.26  | 1.77 | -0.83 | 4132.00 | 6.53  | 2.70  | 1.14   |
| 0.31  | 2429.00 | 2.68  | 0.35 | -0.16 | 1852.00 | 10.48 | 6.65  | 2.81   |
| 0.15  | 1590.00 | 0.75  | 2.28 | -1.07 | 2066.00 | 1.50  | 2.33  | -0.98  |
| 0.19  | 3221.00 | 2.92  | 0.11 | -0.05 | 2737.00 | 7.86  | 4.03  | 1.70   |
| -0.19 | 1315.00 | 0.61  | 2.42 | -1.14 | 1524.00 | 4.07  | 0.24  | 0.10   |
| 0.28  | 2847.00 | 2.60  | 0.43 | -0.20 | 2444.00 | 3.23  | 0.60  | -0.25  |
| 0.70  | 3483.00 | 3.22  | 0.19 | 0.09  | 2769.00 | 9.21  | 5.38  | 2.27   |
| -1.27 | 1251.00 | 0.16  | 2.87 | -1.35 | 2073.00 | 4.44  | 0.61  | 0.26   |
| -0.56 | 1672.00 | 3.77  | 0.74 | 0.35  | 2090.00 | 8.90  | 5.07  | 2.14   |
| 0.90  | 1769.00 | 1.87  | 1.16 | -0.54 | 2081.00 | 8.12  | 4.29  | 1.81   |
| 0.26  | 1966.00 | 4.22  | 1.19 | 0.56  | 3029.00 | 7.33  | 3.50  | 1.48   |
| -0.18 | 2414.00 | 1.49  | 1.54 | -0.72 | 2450.00 | 4.86  | 1.03  | 0.43   |
| -1.10 | 3641.00 | 1.65  | 1.38 | -0.65 | 4271.00 | 6.30  | 2.47  | 1.04   |
| 0.33  | 2651.00 | 7.51  | 4.48 | 2.10  | 2563.00 | 11.78 | 7.95  | 3.36 y |
| -0.69 | 2341.00 | 1.54  | 1.49 | -0.70 | 2610.00 | 3.87  | 0.04  | 0.02   |
| 1.41  | 1036.00 | 2.12  | 0.91 | -0.42 | 1669.00 | 8.99  | 5.16  | 2.18   |
| -1.15 | 3153.00 | 4.00  | 0.97 | 0.46  | 2903.00 | 7.41  | 3.58  | 1.51   |
| 1.60  | 1654.00 | 12.70 | 9.67 | 4.54  | 2839.00 | 25.54 | 21.71 | 9.18 y |
| 1.01  | 2278.00 | 4.21  | 1.18 | 0.56  | 3254.00 | 10.97 | 7.14  | 3.02   |
| 0.57  | 2860.00 | 3.53  | 0.50 | 0.24  | 4578.00 | 8.43  | 4.60  | 1.95   |
| 0.51  | 1352.00 | 3.03  | 0.00 | 0.00  | 2282.00 | 5.17  | 1.34  | 0.57   |
| 0.10  | 4881.00 | 10.35 | 7.32 | 3.44  | 4662.00 | 11.80 | 7.97  | 3.37 y |
| 0.35  | 1959.00 | 4.13  | 1.10 | 0.52  | 1169.00 | 3.76  | 0.07  | -0.03  |
| 0.83  | 5049.00 | 6.10  | 3.07 | 1.44  | 3474.00 | 3.63  | 0.20  | -0.09  |
| 1.19  | 4420.00 | 4.00  | 0.97 | 0.46  | 2670.00 | 6.70  | 2.87  | 1.22   |
| 1.98  | 3279.00 | 7.93  | 4.90 | 2.30  | 3292.00 | 6.44  | 2.61  | 1.10   |
| -0.04 | 4089.00 | 3.42  | 0.39 | 0.19  | 2935.00 | 2.56  | 1.27  | -0.54  |
| -1.00 | 1399.00 | 1.36  | 1.67 | -0.78 | 1071.00 | 4.01  | 0.18  | 0.08   |
| -1.05 | 2751.00 | 3.96  | 0.93 | 0.44  | 2948.00 | 2.51  | 1.32  | -0.56  |
| -0.07 | 2973.00 | 3.40  | 0.37 | 0.17  | 3159.00 | 10.45 | 6.62  | 2.80   |
| -0.05 | 3050.00 | 4.10  | 1.07 | 0.50  | 2311.00 | 3.46  | 0.37  | -0.16  |
| 0.70  | 3818.00 | 9.66  | 6.63 | 3.12  | 2692.00 | 3.90  | 0.07  | 0.03   |
| -1.05 | 3798.00 | 2.24  | 0.79 | -0.37 | 3400.00 | 1.47  | 2.36  | -1.00  |
| -0.77 | 2827.00 | 1.34  | 1.69 | -0.79 | 2683.00 | 3.43  | 0.40  | -0.17  |

|       |         |       |       |       |         |       |       |        |
|-------|---------|-------|-------|-------|---------|-------|-------|--------|
| -0.67 | 3428.00 | 4.76  | 1.73  | 0.81  | 3398.00 | 6.30  | 2.47  | 1.04   |
| -0.15 | 3321.00 | 4.94  | 1.91  | 0.90  | 3531.00 | 6.77  | 2.94  | 1.24   |
| -1.11 | 3340.00 | 3.32  | 0.29  | 0.14  | 3365.00 | 1.99  | 1.84  | -0.78  |
| 0.17  | 4132.00 | 3.10  | 0.07  | 0.03  | 4059.00 | 2.44  | 1.39  | -0.59  |
| 1.16  | 4100.00 | 9.49  | 6.46  | 3.04  | 3521.00 | 8.61  | 4.78  | 2.02 y |
| -0.06 | 4810.00 | 3.16  | 0.13  | 0.06  | 5363.00 | 7.42  | 3.59  | 1.52   |
| -0.67 | 2639.00 | 3.75  | 0.72  | 0.34  | 2574.00 | 3.46  | 0.37  | -0.16  |
| -0.03 | 2733.00 | 4.06  | 1.03  | 0.49  | 2944.00 | 2.31  | 1.52  | -0.64  |
| -1.04 | 2686.00 | 1.79  | 1.24  | -0.58 | 1660.00 | 2.23  | 1.60  | -0.68  |
| -0.78 | 2687.00 | 1.56  | 1.47  | -0.69 | 2302.00 | 1.91  | 1.92  | -0.81  |
| -0.55 | 2851.00 | 0.63  | 2.40  | -1.12 | 4926.00 | 2.66  | 1.17  | -0.49  |
| 0.58  | 2343.00 | 2.39  | 0.64  | -0.30 | 3967.00 | 6.71  | 2.88  | 1.22   |
| -0.46 | 1694.00 | 1.71  | 1.32  | -0.62 | 1490.00 | 3.56  | 0.27  | -0.12  |
| 1.94  | 4107.00 | 9.79  | 6.76  | 3.18  | 3482.00 | 4.71  | 0.88  | 0.37   |
| -0.53 | 3052.00 | 1.80  | 1.23  | -0.57 | 2604.00 | 2.50  | 1.33  | -0.56  |
| -0.34 | 2870.00 | 1.53  | 1.50  | -0.70 | 3210.00 | 1.18  | 2.65  | -1.12  |
| 0.24  | 2991.00 | 5.65  | 2.62  | 1.23  | 2723.00 | 2.39  | 1.44  | -0.61  |
| -1.04 | 3505.00 | 3.11  | 0.08  | 0.04  | 2985.00 | 0.67  | 3.16  | -1.34  |
| -0.54 | 2735.00 | 4.24  | 1.21  | 0.57  | 2800.00 | 2.96  | 0.87  | -0.37  |
| -0.82 | 1680.00 | 2.80  | 0.23  | -0.11 | 1858.00 | 3.18  | 0.65  | -0.28  |
| 1.12  | 3741.00 | 5.29  | 2.26  | 1.06  | 3781.00 | 2.99  | 0.84  | -0.36  |
| 0.52  | 4855.00 | 7.68  | 4.65  | 2.19  | 3946.00 | 4.76  | 0.93  | 0.40   |
| -0.73 | 3180.00 | 3.02  | 0.01  | 0.00  | 3169.00 | 1.70  | 2.13  | -0.90  |
| 0.32  | 1561.00 | 7.50  | 4.47  | 2.10  | 2653.00 | 3.13  | 0.70  | -0.30  |
| -0.12 | 2949.00 | 3.32  | 0.29  | 0.14  | 3960.00 | 3.21  | 0.62  | -0.26  |
| -1.14 | 3709.00 | 0.08  | 2.95  | -1.38 | 4000.00 | 5.48  | 1.65  | 0.70   |
| 0.52  | 2111.00 | 3.74  | 0.71  | 0.34  | 3873.00 | 3.98  | 0.15  | 0.06   |
| 0.28  | 2917.00 | 7.10  | 4.07  | 1.91  | 4631.00 | 8.21  | 4.38  | 1.85   |
| 0.22  | 3285.00 | 7.70  | 4.67  | 2.20  | 5310.00 | 9.11  | 5.28  | 2.23 x |
| -0.34 | 2354.00 | 2.46  | 0.57  | -0.26 | 3671.00 | 1.61  | 2.22  | -0.94  |
| 1.27  | 2563.00 | 6.24  | 3.21  | 1.51  | 3648.00 | 6.47  | 2.64  | 1.12   |
| 2.38  | 3561.00 | 11.18 | 8.15  | 3.83  | 3437.00 | 4.04  | 0.21  | 0.09 y |
| -1.07 | 2250.00 | 2.18  | 0.85  | -0.40 | 3527.00 | 3.46  | 0.37  | -0.16  |
| 1.33  | 2026.00 | 7.95  | 4.92  | 2.31  | 1940.00 | 2.22  | 1.61  | -0.68  |
| -0.24 | 1927.00 | 3.17  | 0.14  | 0.07  | 2864.00 | 2.16  | 1.67  | -0.70  |
| 3.81  | 1273.00 | 16.03 | 13.00 | 6.11  | 1786.00 | 14.50 | 10.67 | 4.51 y |
| 0.91  | 2811.00 | 14.94 | 11.91 | 5.60  | 3914.00 | 8.43  | 4.60  | 1.95   |
| -0.85 | 2315.00 | 4.32  | 1.29  | 0.61  | 3422.00 | 1.81  | 2.02  | -0.85  |
| 0.03  | 2890.00 | 5.26  | 2.23  | 1.05  | 4278.00 | 4.53  | 0.70  | 0.30   |
| 2.06  | 3410.00 | 6.83  | 3.80  | 1.79  | 3370.00 | 3.38  | 0.45  | -0.19  |
| -1.40 | 3464.00 | 2.54  | 0.49  | -0.23 | 3128.00 | 3.39  | 0.44  | -0.19  |
| 0.32  | 3072.00 | 5.66  | 2.63  | 1.24  | 4394.00 | 4.89  | 1.06  | 0.45   |
| -0.98 | 459.00  | 2.18  | 0.85  | -0.40 | 1319.00 | 3.64  | 0.19  | -0.08  |
| -0.33 | 524.00  | 3.63  | 0.60  | 0.28  | 623.00  | 2.09  | 1.74  | -0.74  |
| 0.29  | 3459.00 | 3.35  | 0.32  | 0.15  | 5053.00 | 3.46  | 0.37  | -0.15  |
| -0.69 | 2441.00 | 3.32  | 0.29  | 0.14  | 3613.00 | 2.02  | 1.81  | -0.76  |
| 0.47  | 3192.00 | 4.48  | 1.45  | 0.68  | 2353.00 | 2.04  | 1.79  | -0.76  |

|         |         |       |         |       |         |       |      |        |
|---------|---------|-------|---------|-------|---------|-------|------|--------|
| 1.47    | 2593.00 | 13.07 | 10.04   | 4.72  | 1381.00 | 2.39  | 1.44 | -0.61  |
| -0.33   | 2455.00 | 1.79  | 1.24    | -0.58 | 2664.00 | 0.94  | 2.89 | -1.22  |
| -0.01   | 2102.00 | 4.09  | 1.06    | 0.50  | 3052.00 | 4.75  | 0.92 | 0.39   |
| 0.08    | 2879.00 | 5.04  | 2.01    | 0.94  | 4159.00 | 5.22  | 1.39 | 0.59   |
| 0.22    | 2729.00 | 2.38  | 0.65    | -0.30 | 2907.00 | 1.07  | 2.76 | -1.17  |
| 0.50    | 1401.00 | 3.07  | 0.04    | 0.02  | 1949.00 | 1.90  | 1.93 | -0.82  |
| -0.39   | 2375.00 | 1.64  | 1.39    | -0.65 | 2812.00 | 3.88  | 0.05 | 0.02   |
| -0.45   | 2413.00 | 3.15  | 0.12    | 0.06  | 2309.00 | 0.82  | 3.01 | -1.27  |
| 0.81    | 3245.00 | 8.26  | 5.23    | 2.46  | 3874.00 | 4.59  | 0.76 | 0.32   |
| -0.86   | 3078.00 | 0.94  | 2.09    | -0.98 | 3087.00 | 1.20  | 2.63 | -1.11  |
| -0.08   | 2355.00 | 5.82  | 2.79    | 1.31  | 2397.00 | 4.80  | 0.97 | 0.41   |
| -0.65   | 1826.00 | 3.40  | 0.37    | 0.17  | 3134.00 | 2.46  | 1.37 | -0.58  |
| -0.19   | 2470.00 | 5.22  | 2.19    | 1.03  | 2659.00 | 2.18  | 1.65 | -0.70  |
| -0.76   | 1643.00 | 1.64  | 1.39    | -0.65 | 3126.00 | 2.94  | 0.89 | -0.37  |
| 0.75    | 1711.00 | 4.50  | 1.47    | 0.69  | 2737.00 | 4.97  | 1.14 | 0.48   |
| 0.24    | 3204.00 | 2.78  | 0.25    | -0.12 | 3984.00 | 4.27  | 0.44 | 0.19   |
| -1.20   | 2978.00 | 2.35  | 0.68    | -0.32 | 3551.00 | 4.31  | 0.48 | 0.20   |
| -1.21   | 2120.00 | 1.51  | 1.52    | -0.71 | 3508.00 | 5.16  | 1.33 | 0.56   |
| -1.06   | 1034.00 | 4.26  | 1.23    | 0.58  | 2683.00 | 2.27  | 1.56 | -0.66  |
| -0.93   | 698.00  | 0.72  | 2.31    | -1.08 | 1290.00 | 0.78  | 3.05 | -1.29  |
| -0.85   | 3297.00 | 2.91  | 0.12    | -0.05 | 3174.00 | 3.59  | 0.24 | -0.10  |
| -0.69   | 1867.00 | 0.21  | 2.82    | -1.32 | 3193.00 | 1.35  | 2.48 | -1.05  |
| 1.33    | 1643.00 | 5.60  | 2.57    | 1.21  | 2457.00 | 5.49  | 1.66 | 0.70   |
| -0.50   | 1935.00 | 4.60  | 1.57    | 0.74  | 3583.00 | 6.42  | 2.59 | 1.10   |
| -0.64   | 843.00  | 0.47  | 2.56    | -1.20 | 1504.00 | 4.12  | 0.29 | 0.12   |
| -0.07   | 2218.00 | 2.84  | 0.19    | -0.09 | 3441.00 | 5.93  | 2.10 | 0.89   |
| 0.34    | 1291.00 | 3.95  | 0.92    | 0.43  | 1545.00 | 2.39  | 1.44 | -0.61  |
| -1.12   | 1763.00 | 1.47  | 1.56    | -0.73 | 2612.00 | 2.34  | 1.49 | -0.63  |
| 0.46    | 2195.00 | 4.28  | 1.25    | 0.59  | 3052.00 | 6.85  | 3.02 | 1.28   |
| 0.72    | 3567.00 | 7.49  | 4.46    | 2.09  | 4133.00 | 8.93  | 5.10 | 2.16 y |
| -0.34   | 1967.00 | 3.56  | 0.53    | 0.25  | 2131.00 | 5.54  | 1.71 | 0.72   |
| 0.91    | 3476.00 | 3.25  | 0.22    | 0.11  | 4465.00 | 3.61  | 0.22 | -0.09  |
| 1.66    | 1605.00 | 4.17  | 1.14    | 0.54  | 2307.00 | 6.50  | 2.67 | 1.13   |
| -0.07   | 2716.00 | 5.23  | 2.20    | 1.03  | 3313.00 | 5.64  | 1.81 | 0.77   |
| -0.11   | 2584.00 | 4.61  | 1.58    | 0.74  | 3322.00 | 10.60 | 6.77 | 2.86   |
| -0.65   | 2627.00 | 2.51  | 0.52    | -0.24 | 3056.00 | 3.86  | 0.03 | 0.01   |
| 1.44    | 1621.00 | 0.80  | 2.23    | -1.04 | 2159.00 | 10.14 | 6.31 | 2.67   |
| -0.48   | 1697.00 | 4.77  | 1.74    | 0.82  | 2518.00 | 6.04  | 2.21 | 0.93   |
| -0.87   | 1547.00 | 1.62  | 1.41    | -0.66 | 2563.00 | 3.28  | 0.55 | -0.23  |
|         | 2354.50 | 3.03  | 1.44    |       | 3368.50 | 3.83  | 1.60 |        |
|         |         |       | 4.32    |       |         |       | 4.79 |        |
|         |         |       | 2.13    |       |         |       | 2.36 |        |
| 2446.00 | 20.11   |       | 5665.00 | 34.37 |         |       |      |        |
| 2661.00 | 22.85   |       | 4830.00 | 25.20 |         |       |      |        |
| 3019.00 | 12.29   |       | 4941.00 | 24.19 |         |       |      |        |
| 2253.00 | 19.09   |       | 4506.00 | 27.61 |         |       |      |        |
| 2594.75 | 18.58   |       | 4985.50 | 27.84 |         |       |      |        |

|         |       |         |       |
|---------|-------|---------|-------|
| 328.28  | 4.49  | 489.15  | 4.58  |
| 1107.00 | 0.99  | 2138.00 | 4.91  |
| 1580.00 | 0.32  | 2965.00 | 6.75  |
| 1183.00 | 1.01  | 1440.00 | 6.60  |
| 1889.00 | 2.70  | 2264.00 | 5.30  |
| 1439.75 | 1.26  | 2201.75 | 5.89  |
| 364.30  | 1.02  | 624.70  | 0.92  |
|         | 13.46 |         | 13.75 |
|         | 3.05  |         | 2.76  |
|         | 16.51 |         | 16.51 |
|         | 17.33 |         | 21.95 |
|         | 0.95  |         | 0.75  |
|         | 0.05  |         | 0.25  |





toxic b

debris a,c  
debris b,c





debris a,b

| Plate    | Well | Gene                   | GeneID             | Cell Count | % inf | Abs Dev |
|----------|------|------------------------|--------------------|------------|-------|---------|
| 50024.00 | A02  | M-003544- signal trans | 6774.00 STAT3      | 4141.00    | 2.03  | 2.66    |
| 50024.00 | A04  | M-018709- actin-bindin | 137735.00 ABRA     | 3531.00    | 2.15  | 2.54    |
| 50024.00 | A05  | M-008462- prostaglan   | 9536.00 PTGES      | 2696.00    | 1.93  | 2.76    |
| 50024.00 | A06  | M-017361- signal trans | 10254.00 STAM2     | 1893.00    | 4.23  | 0.46    |
| 50024.00 | A07  | M-005207- prothymos    | 5757.00 PTMA       | 1448.00    | 11.26 | 6.57    |
| 50024.00 | A08  | M-019732- SH3 and cy   | 6769.00 STAC       | 2187.00    | 5.85  | 1.16    |
| 50024.00 | A09  | M-019928- RNA bindin   | 5940.00 RBMY1A1    | 1214.00    | 5.44  | 0.75    |
| 50024.00 | A10  | M-017234- suppressio   | 54879.00 ST7L      | 2844.00    | 6.12  | 1.43    |
| 50024.00 | A11  | M-008289- retinol binc | 5950.00 RBP4       | 1051.00    | 3.62  | 1.07    |
| 50024.00 | A12  | M-020119- Sjogren's s  | 10534.00 SSSCA1    | 2054.00    | 5.31  | 0.62    |
| 50024.00 | A13  | M-012504- recombinai   | 11317.00 RBPJL     | 1032.00    | 2.23  | 2.46    |
| 50024.00 | A14  | M-011901- sarcospan (  | 8082.00 SSPN       | 499.00     | 9.02  | 4.33    |
| 50024.00 | A15  | M-015968- RAB11 fam    | 80223.00 RAB11FIP1 | 1801.00    | 2.94  | 1.75    |
| 50024.00 | A16  | M-020042- synovial sa  | 6760.00 SS18       | 1860.00    | 10.00 | 5.31    |
| 50024.00 | A17  | M-012650- recoverin    | 5957.00 RCVRN      | 2545.00    | 8.49  | 3.80    |
| 50024.00 | A18  | M-015368- serine/argi  | 23524.00 SRRM2     | 2360.00    | 7.37  | 2.68    |
| 50024.00 | A19  | M-021277- REC8 homc    | 9985.00 REC8       | 2077.00    | 1.83  | 2.86    |
| 50024.00 | A20  | M-019716- signal reco  | 6731.00 SRP72      | 2432.00    | 2.06  | 2.63    |
| 50024.00 | A21  | M-013597- RecQ prote   | 5965.00 RECQL      | 2802.00    | 7.03  | 2.34    |
| 50024.00 | A23  | M-020710- reprimo, Tf  | 56475.00 RPRM      | 2692.00    | 6.54  | 1.85    |
| 50024.00 | B05  | M-021064- signal trans | 55250.00 STATIP1   | 1459.00    | 0.96  | 3.73    |
| 50024.00 | B07  | M-019802- stress-indu  | 10963.00 STIP1     | 3866.00    | 3.36  | 1.33    |
| 50024.00 | B09  | M-015159- serine/thre  | 114790.00 STK11IP  | 1118.00    | 0.18  | 4.51    |
| 50024.00 | B11  | M-019342- stathmin-li  | 11075.00 STMN2     | 1908.00    | 1.57  | 3.12    |
| 50024.00 | B13  | M-013600- stathmin-li  | 50861.00 STMN3     | 1797.00    | 1.67  | 3.02    |
| 50024.00 | B15  | M-016971- stomatin     | 2040.00 STOM       | 1407.00    | 0.78  | 3.91    |
| 50024.00 | B17  | M-015712- stereocilin  | 161497.00 STRC     | 2599.00    | 1.65  | 3.04    |
| 50024.00 | B19  | M-008949- sulfotransf  | 27284.00 SULT1B1   | 2009.00    | 1.34  | 3.35    |
| 50024.00 | B21  | M-009661- sulfotransf  | 6822.00 SULT2A1    | 3054.00    | 4.81  | 0.12    |
| 50024.00 | B23  | M-016234- suppressor   | 6829.00 SUPT5H     | 1956.00    | 0.31  | 4.38    |
| 50024.00 | C02  | M-009549- sterol regu  | 6721.00 SREBF2     | 3520.00    | 4.69  | 0.00    |
| 50024.00 | C04  | M-019726- spectrin, al | 6708.00 SPTA1      | 1934.00    | 7.29  | 2.60    |
| 50024.00 | C05  | M-032267- RFNG O-fur   | 5986.00 RFNG       | 4189.00    | 4.06  | 0.63    |
| 50024.00 | C06  | M-012718- sprouty ho   | 10251.00 SPRY3     | 3897.00    | 4.47  | 0.23    |
| 50024.00 | C07  | M-017463- chromoson    | 28984.00 C13orf15  | 2864.00    | 5.76  | 1.07    |
| 50024.00 | C08  | M-005206- sprouty ho   | 10253.00 SPRY2     | 3510.00    | 5.04  | 0.35    |
| 50024.00 | C09  | M-024506- Rho-guanir   | 64283.00 RGNEF     | 3264.00    | 15.99 | 11.30   |
| 50024.00 | C10  | M-027339- sprouty ho   | 10252.00 SPRY1     | 2125.00    | 12.89 | 8.20    |
| 50024.00 | C11  | M-019354- Rh-associat  | 6005.00 RHAG       | 2244.00    | 10.78 | 6.09    |
| 50024.00 | C12  | M-019983- spindlin 1   | 10927.00 SPIN1     | 2708.00    | 3.73  | 0.96    |
| 50024.00 | C13  | M-013183- Rh blood gi  | 6006.00 RHCE       | 1588.00    | 4.22  | 0.47    |
| 50024.00 | C14  | M-016274- Spi-C trans  | 121599.00 SPIC     | 1807.00    | 3.93  | 0.76    |
| 50024.00 | C15  | M-017229- Rh blood gi  | 6007.00 RHD        | 1607.00    | 3.36  | 1.33    |
| 50024.00 | C16  | M-019987- S-phase res  | 10638.00 SPHAR     | 2301.00    | 3.35  | 1.34    |
| 50024.00 | C17  | M-009692- Ras homok    | 6009.00 RHEB       | 2155.00    | 3.67  | 1.02    |
| 50024.00 | C18  | M-015681- spastic par  | 23111.00 SPG20     | 1249.00    | 3.04  | 1.65    |

|              |                         |           |         |         |       |      |
|--------------|-------------------------|-----------|---------|---------|-------|------|
| 50024.00 C19 | M-008213- Rho GTPase    | 9743.00   | RICS    | 1163.00 | 2.92  | 1.77 |
| 50024.00 C20 | M-017462- sperm asso    | 9043.00   | SPAG9   | 701.00  | 3.99  | 0.70 |
| 50024.00 C21 | M-007058- zinc finger   | 65986.00  | ZBTB10  | 1259.00 | 1.99  | 2.70 |
| 50024.00 C23 | M-005002- RIO kinase    | 55781.00  | RIOK2   | 2467.00 | 1.74  | 2.95 |
| 50024.00 D05 | M-005161- transformin   | 6867.00   | TACC1   | 1921.00 | 3.70  | 0.99 |
| 50024.00 D07 | M-012356- transformin   | 10579.00  | TACC2   | 2442.00 | 6.76  | 2.07 |
| 50024.00 D09 | M-004155- transformin   | 10460.00  | TACC3   | 1753.00 | 2.17  | 2.52 |
| 50024.00 D11 | M-004568- tumor-assc    | 4072.00   | TACSTD1 | 1840.00 | 7.55  | 2.86 |
| 50024.00 D13 | M-032253- TAF13 RNA     | 6884.00   | TAF13   | 1241.00 | 5.08  | 0.39 |
| 50024.00 D15 | M-008930- TAF15 RNA     | 8148.00   | TAF15   | 1734.00 | 8.94  | 4.25 |
| 50024.00 D17 | M-009341- TAF2 RNA      | 6873.00   | TAF2    | 1032.00 | 4.46  | 0.23 |
| 50024.00 D19 | M-006878- TAF4 RNA      | 6874.00   | TAF4    | 1175.00 | 8.43  | 3.74 |
| 50024.00 D21 | M-003714- transgelin    | 6876.00   | TAGLN   | 1539.00 | 3.83  | 0.86 |
| 50024.00 D23 | M-011468- transgelin    | 8407.00   | TAGLN2  | 2225.00 | 3.33  | 1.36 |
| 50024.00 E02 | M-012481- sperm asso    | 9576.00   | SPAG6   | 5996.00 | 10.06 | 5.37 |
| 50024.00 E04 | M-004312- sperm asso    | 6674.00   | SPAG1   | 1749.00 | 6.06  | 1.37 |
| 50024.00 E05 | M-015969- retinaldehy   | 6017.00   | RLBP1   | 2531.00 | 3.67  | 1.02 |
| 50024.00 E06 | M-015955- Sp2 transcr   | 6668.00   | SP2     | 3671.00 | 5.50  | 0.81 |
| 50024.00 E07 | M-012270- retinitis pig | 6101.00   | RP1     | 1773.00 | 5.25  | 0.56 |
| 50024.00 E08 | M-012143- SRY (sex de   | 6658.00   | SOX3    | 1973.00 | 7.81  | 3.12 |
| 50024.00 E09 | M-019139- DCN1, defe    | 54165.00  | DCUN1D1 | 2880.00 | 6.28  | 1.59 |
| 50024.00 E10 | M-014616- sclerosteos   | 50964.00  | SOST    | 2800.00 | 7.79  | 3.10 |
| 50024.00 E11 | M-015479- retinitis pig | 57096.00  | RPGRIP1 | 1156.00 | 8.22  | 3.53 |
| 50024.00 E12 | M-008323- sorbitol del  | 6652.00   | SORD    | 919.00  | 7.40  | 2.71 |
| 50024.00 E13 | M-015951- RaP2 intera   | 10900.00  | RPIP8   | 1770.00 | 6.78  | 2.09 |
| 50024.00 E14 | M-008364- superoxide    | 6647.00   | SOD1    | 2014.00 | 7.15  | 2.46 |
| 50024.00 E15 | M-012164- ribosomal     | 6134.00   | RPL10   | 645.00  | 8.68  | 3.99 |
| 50024.00 E16 | M-009037- suppressor    | 122809.00 | SOCS4   | 2399.00 | 5.00  | 0.31 |
| 50024.00 E17 | M-013703- ribosomal     | 6135.00   | RPL11   | 524.00  | 11.07 | 6.38 |
| 50024.00 E18 | M-004299- suppressor    | 9021.00   | SOCS3   | 1616.00 | 3.09  | 1.60 |
| 50024.00 E19 | M-013601- ribosomal     | 23521.00  | RPL13A  | 717.00  | 7.25  | 2.56 |
| 50024.00 E20 | M-005240- sterol O-ac   | 6646.00   | SOAT1   | 1889.00 | 5.56  | 0.87 |
| 50024.00 E21 | M-011146- ribosomal     | 6161.00   | RPL32   | 589.00  | 4.75  | 0.06 |
| 50024.00 E23 | M-011147- ribosomal     | 6167.00   | RPL37   | 769.00  | 2.34  | 2.35 |
| 50024.00 F05 | M-017380- suppressioi   | 6767.00   | ST13    | 3024.00 | 3.11  | 1.58 |
| 50024.00 F07 | M-012855- survival of   | 6607.00   | SMN2    | 751.00  | 8.66  | 3.97 |
| 50024.00 F09 | M-019349- parathymo     | 5763.00   | PTMS    | 1962.00 | 4.33  | 0.36 |
| 50024.00 F11 | M-018793- pleiotrophi   | 5764.00   | PTN     | 1310.00 | 3.89  | 0.80 |
| 50024.00 F13 | M-013223- signal-regu   | 140885.00 | SIRPA   | 1477.00 | 3.59  | 1.10 |
| 50024.00 F15 | M-017788- signal-regu   | 128646.00 | SIRPD   | 2218.00 | 6.04  | 1.35 |
| 50024.00 F17 | M-012135- protein tyr   | 5790.00   | PTPRCAP | 2250.00 | 2.44  | 2.25 |
| 50024.00 F19 | M-010377- 6-pyruvoyli   | 5805.00   | PTS     | 3406.00 | 4.99  | 0.30 |
| 50024.00 F21 | M-011820- pituitary tu  | 754.00    | PTTG1IP | 1900.00 | 2.53  | 2.16 |
| 50024.00 F23 | M-012746- pituitary tu  | 10744.00  | PTTG2   | 1079.00 | 2.87  | 1.82 |
| 50024.00 G02 | M-012524- sorting nex   | 27131.00  | SNX5    | 5795.00 | 10.08 | 5.39 |
| 50024.00 G04 | M-012985- SNRPN ups     | 8926.00   | SNURF   | 2362.00 | 5.17  | 0.48 |
| 50024.00 G05 | M-013478- ribosomal     | 6168.00   | RPL37A  | 632.00  | 8.07  | 3.38 |

|              |                        |                   |         |       |       |
|--------------|------------------------|-------------------|---------|-------|-------|
| 50024.00 G06 | M-018536- stannin      | 8303.00 SNN       | 1831.00 | 3.93  | 0.76  |
| 50024.00 G07 | M-013611- ribosomal p  | 6125.00 RPL5      | 710.00  | 13.10 | 8.41  |
| 50024.00 G08 | M-016479- Smad nucle   | 79753.00 SNIP1    | 1634.00 | 6.36  | 1.67  |
| 50024.00 G09 | M-019738- ribonuclea   | 11102.00 RPP14    | 1159.00 | 4.49  | 0.20  |
| 50024.00 G10 | M-011109- synuclein, a | 6622.00 SNCA      | 1542.00 | 3.70  | 0.99  |
| 50024.00 G11 | M-013627- ribosomal p  | 6217.00 RPS16     | 750.00  | 8.13  | 3.44  |
| 50024.00 G12 | M-015399- small nucle  | 6617.00 SNAPC1    | 1912.00 | 5.96  | 1.27  |
| 50024.00 G13 | M-003771- ribosomal p  | 6223.00 RPS19     | 450.00  | 9.33  | 4.64  |
| 50024.00 G14 | M-022719- SMYD fami    | 10322.00 SMYD5    | 1907.00 | 6.50  | 1.81  |
| 50024.00 G15 | M-011156- ribosomal p  | 6232.00 RPS27     | 1345.00 | 7.21  | 2.52  |
| 50024.00 G16 | M-013737- SET and M    | 64754.00 SMYD3    | 1704.00 | 3.87  | 0.82  |
| 50024.00 G17 | M-011157- ribosomal p  | 6235.00 RPS29     | 174.00  | 41.38 | 36.69 |
| 50024.00 G18 | M-020291- SET and M    | 56950.00 SMYD2    | 1524.00 | 1.25  | 3.44  |
| 50024.00 G19 | M-011138- ribosomal p  | 6191.00 RPS4X     | 351.00  | 9.97  | 5.28  |
| 50024.00 G20 | M-017273- spermine s   | 6611.00 SMS       | 1132.00 | 3.18  | 1.51  |
| 50024.00 G21 | M-011131- ribosomal p  | 6203.00 RPS9      | 662.00  | 5.74  | 1.05  |
| 50024.00 G23 | M-019972- RCD1 requi   | 9125.00 RQCD1     | 1204.00 | 2.74  | 1.95  |
| 50024.00 H05 | M-014110- pituitary tu | 26255.00 PTTG3    | 1513.00 | 1.98  | 2.71  |
| 50024.00 H07 | M-013952- poliovirus r | 25945.00 PVRL3    | 917.00  | 1.74  | 2.95  |
| 50024.00 H09 | M-029357- Pvt1 oncog   | 5820.00 PVT1      | 2141.00 | 4.48  | 0.21  |
| 50024.00 H11 | M-012594- peroxisom    | 5824.00 PEX19     | 883.00  | 5.32  | 0.63  |
| 50024.00 H13 | M-021171- peroxisom    | 5827.00 PXMP2     | 1066.00 | 3.47  | 1.22  |
| 50024.00 H15 | M-009569- phosphoryl   | 5836.00 PYGL      | 1910.00 | 8.85  | 4.16  |
| 50024.00 H17 | M-009367- phosphoryl   | 5837.00 PYGM      | 1139.00 | 6.85  | 2.16  |
| 50024.00 H19 | M-011371- quiescin Q   | 5768.00 QSCN6     | 1110.00 | 5.14  | 0.45  |
| 50024.00 H21 | M-010823- RAB10, me    | 10890.00 RAB10    | 1982.00 | 1.01  | 3.68  |
| 50024.00 H23 | M-010533- RAB2A, me    | 5862.00 RAB2A     | 2399.00 | 1.96  | 2.73  |
| 50024.00 I02 | M-017244- SWI/SNF re   | 6602.00 SMARCD1   | 5469.00 | 2.83  | 1.86  |
| 50024.00 I04 | M-010813- SWI/SNF re   | 6599.00 SMARCC1   | 4995.00 | 8.51  | 3.82  |
| 50024.00 I05 | M-016120- Ras-relatec  | 58528.00 RRAGD    | 4098.00 | 2.73  | 1.96  |
| 50024.00 I06 | M-010536- SWI/SNF re   | 6598.00 SMARCB1   | 2278.00 | 2.02  | 2.67  |
| 50024.00 I07 | M-019212- Ras suppre   | 6251.00 RSU1      | 2681.00 | 5.22  | 0.53  |
| 50024.00 I08 | M-011392- SWI/SNF re   | 6594.00 SMARCA1   | 4768.00 | 9.12  | 4.43  |
| 50024.00 I09 | M-012527- rhabdoid tu  | 27156.00 RTDR1    | 2481.00 | 5.28  | 0.59  |
| 50024.00 I10 | M-012599- slit homolo  | 6585.00 SLIT1     | 1632.00 | 6.92  | 2.23  |
| 50024.00 I11 | M-015936- RING1 and    | 23429.00 RYBP     | 1901.00 | 1.16  | 3.53  |
| 50024.00 I12 | M-007603- solute carri | 6531.00 SLC6A3    | 1705.00 | 5.04  | 0.35  |
| 50024.00 I13 | M-006292- ryanodine r  | 6261.00 RYR1      | 1616.00 | 1.67  | 3.02  |
| 50024.00 I14 | M-021089- solute carri | 22950.00 SLC4A1AP | 2038.00 | 10.60 | 5.91  |
| 50024.00 I15 | M-011766- S100 calciu  | 6281.00 S100A10   | 2069.00 | 3.14  | 1.55  |
| 50024.00 I16 | M-007578- solute carri | 8501.00 SLC43A1   | 1590.00 | 10.94 | 6.25  |
| 50024.00 I17 | M-012139- S100 calciu  | 6283.00 S100A12   | 1498.00 | 3.20  | 1.49  |
| 50024.00 I18 | M-007485- solute carri | 291.00 SLC25A4    | 1392.00 | 3.23  | 1.46  |
| 50024.00 I19 | M-011768- S100 calciu  | 6276.00 S100A5    | 1517.00 | 2.57  | 2.12  |
| 50024.00 I20 | M-007452- solute carri | 5002.00 SLC22A18  | 1940.00 | 2.27  | 2.42  |
| 50024.00 I21 | M-011769- S100 calciu  | 6278.00 S100A7    | 2569.00 | 7.32  | 2.63  |
| 50024.00 I23 | M-019361- serum amy    | 6288.00 SAA1      | 545.00  | 3.49  | 1.20  |

|                     |                            |                |               |                |              |             |
|---------------------|----------------------------|----------------|---------------|----------------|--------------|-------------|
| 50024.00 J05        | M-019214- RAB22A, m        | 57403.00       | RAB22A        | 2665.00        | 7.65         | 2.96        |
| 50024.00 J07        | M-010065- RAB31, me        | 11031.00       | RAB31         | 2621.00        | 1.87         | 2.82        |
| 50024.00 J09        | M-009781- RAB35, me        | 11021.00       | RAB35         | 2941.00        | 3.98         | 0.71        |
| 50024.00 J11        | M-010822- RAB3D, me        | 9545.00        | RAB3D         | 848.00         | 2.83         | 1.86        |
| 50024.00 J13        | M-016616- RAB3A inte       | 5866.00        | RAB3IL1       | 1353.00        | 6.80         | 2.11        |
| 50024.00 J15        | M-008539- RAB4A, me        | 5867.00        | RAB4A         | 2673.00        | 8.75         | 4.06        |
| 50024.00 J17        | M-004010- RAB5B, me        | 5869.00        | RAB5B         | 3237.00        | 8.80         | 4.11        |
| <b>50024.00 J19</b> | <b>M-032266- RAB9, men</b> | <b>9366.00</b> | <b>RAB9P1</b> | <b>4589.00</b> | <b>13.69</b> | <b>9.00</b> |
| 50024.00 J21        | M-019457- Rab9 effect      | 10244.00       | RABEPK        | 2281.00        | 3.24         | 1.45        |
| 50024.00 J23        | M-020136- Rab accept       | 10567.00       | RABAC1        | 1315.00        | 2.59         | 2.10        |
| 50024.00 K02        | M-007384- solute carri     | 6559.00        | SLC12A3       | 5493.00        | 3.31         | 1.38        |
| 50024.00 K04        | M-010535- SKI-like onc     | 6498.00        | SKI           | 5054.00        | 3.96         | 0.73        |
| 50024.00 K05        | M-020571- spastic ata      | 26278.00       | SACS          | 4282.00        | 7.08         | 2.39        |
| 50024.00 K06        | M-003927- v-ski sarcor     | 6497.00        | SKI           | 4622.00        | 4.95         | 0.26        |
| 50024.00 K07        | M-004229- SAM doma         | 64092.00       | SAMSN1        | 3103.00        | 2.19         | 2.50        |
| 50024.00 K08        | M-013337- signal-regu      | 55423.00       | SIRPG         | 2499.00        | 2.76         | 1.93        |
| 50024.00 K09        | M-017283- squamous         | 9092.00        | SART1         | 870.00         | 6.78         | 2.09        |
| 50024.00 K10        | M-012193- signal-regu      | 10326.00       | SIRPB1        | 1581.00        | 2.59         | 2.10        |
| 50024.00 K11        | M-003703- tetraspanir      | 6302.00        | TSPAN31       | 2478.00        | 2.18         | 2.51        |
| 50024.00 K12        | M-012769- silver homc      | 6490.00        | SILV          | 1243.00        | 5.15         | 0.46        |
| 50024.00 K13        | M-019217- Shwachma         | 51119.00       | SBDS          | 3638.00        | 6.16         | 1.47        |
| 50024.00 K14        | M-019717- SCL/TAL1 ir      | 6491.00        | STIL          | 1885.00        | 4.14         | 0.55        |
| 50024.00 K15        | M-011772- ataxin 2         | 6311.00        | ATXN2         | 2493.00        | 2.41         | 2.28        |
| 50024.00 K16        | M-009503- sucrase-iso      | 6476.00        | SI            | 756.00         | 3.70         | 0.99        |
| 50024.00 K17        | M-032268- ataxin 8 op      | 6315.00        | ATXN8OS       | 3260.00        | 4.60         | 0.09        |
| 50024.00 K18        | M-031192- SHC (Src hc      | 25759.00       | SHC2          | 3374.00        | 2.96         | 1.73        |
| 50024.00 K19        | M-003704- secretory c      | 10066.00       | SCAMP2        | 4218.00        | 9.06         | 4.37        |
| 50024.00 K20        | M-024645- SH3 and mi       | 85358.00       | SHANK3        | 2627.00        | 7.38         | 2.69        |
| 50024.00 K21        | M-012808- SREBF chap       | 22937.00       | SCAP          | 3500.00        | 1.57         | 3.12        |
| 50024.00 K23        | M-013241- scavenger r      | 51435.00       | SCARA3        | 1509.00        | 2.32         | 2.37        |
| 50024.00 L05        | M-009565- RAB, memf        | 11020.00       | RABL4         | 3581.00        | 8.66         | 3.97        |
| 50024.00 L07        | M-008836- ras-related      | 5881.00        | RAC3          | 3874.00        | 5.94         | 1.25        |
| <b>50024.00 L09</b> | <b>M-011760- RAD52 hon</b> | <b>5893.00</b> | <b>RAD52</b>  | <b>4396.00</b> | <b>11.22</b> | <b>6.53</b> |
| 50024.00 L11        | M-004592- RAD54-like       | 8438.00        | RAD54L        | 3627.00        | 6.78         | 2.09        |
| 50024.00 L13        | M-003295- RAD9 homc        | 5883.00        | RAD9A         | 2080.00        | 5.82         | 1.13        |
| 50024.00 L15        | M-012296- retinoic aci     | 10742.00       | RAI2          | 1794.00        | 2.45         | 2.24        |
| 50024.00 L17        | M-009266- ralA bindin      | 10928.00       | RALBP1        | 2508.00        | 12.80        | 8.11        |
| 50024.00 L18        | M-010491- X-ray repai      | 7520.00        | XRCC5         | 3789.00        | 5.36         | 0.67        |
| 50024.00 L19        | M-008248- Ral GEF wit      | 9649.00        | RALGPS1       | 4889.00        | 9.82         | 5.13        |
| 50024.00 L20        | M-004494- X-ray repai      | 7518.00        | XRCC4         | 1630.00        | 5.40         | 0.71        |
| 50024.00 L21        | M-020543- denticleles      | 51514.00       | DTL           | 3017.00        | 3.78         | 0.91        |
| 50024.00 L23        | M-006627- RAN bindin       | 5902.00        | RANBP1        | 3099.00        | 4.29         | 0.40        |
| 50024.00 M02        | M-006657- SH3 and PX       | 9644.00        | SH3PXD2A      | 5222.00        | 4.27         | 0.42        |
| 50024.00 M04        | M-014748- SH3-domai        | 30011.00       | SH3KBP1       | 4990.00        | 8.40         | 3.71        |
| 50024.00 M05        | M-012087- scavenger r      | 950.00         | SCARB2        | 3807.00        | 2.97         | 1.72        |
| 50024.00 M06        | M-015728- SH3-domai        | 6457.00        | SH3GL3        | 4814.00        | 2.93         | 1.76        |
| 50024.00 M07        | M-011533- sciellin         | 8796.00        | SCEL          | 5108.00        | 2.64         | 2.05        |

|              |                        |                   |         |       |       |
|--------------|------------------------|-------------------|---------|-------|-------|
| 50024.00 M08 | M-019582- SH3-domai    | 6455.00 SH3GL1    | 4993.00 | 7.15  | 2.46  |
| 50024.00 M09 | M-012290- secretoglot  | 10648.00 SCGB1D1  | 2299.00 | 2.96  | 1.73  |
| 50024.00 M10 | M-015398- SH3-domai    | 6452.00 SH3BP2    | 2880.00 | 4.83  | 0.14  |
| 50024.00 M11 | M-015732- secretoglot  | 117156.00 SCGB3A2 | 3936.00 | 3.89  | 0.80  |
| 50024.00 M12 | M-019969- SH2 domai    | 10045.00 SH2D3A   | 1337.00 | 2.84  | 1.85  |
| 50024.00 M13 | M-012809- sex comb c   | 22955.00 SCMH1    | 1510.00 | 1.85  | 2.84  |
| 50024.00 M14 | M-017851- SH2 domai    | 9047.00 SH2D2A    | 2805.00 | 4.53  | 0.16  |
| 50024.00 M15 | M-020090- sex comb c   | 10389.00 SCML2    | 2725.00 | 4.26  | 0.43  |
| 50024.00 M16 | M-011075- sarcoglycar  | 6445.00 SGCG      | 1771.00 | 1.75  | 2.94  |
| 50024.00 M17 | M-006295- sodium cha   | 6336.00 SCN10A    | 2576.00 | 2.10  | 2.59  |
| 50024.00 M18 | M-017292- sarcoglycar  | 6444.00 SGCD      | 2442.00 | 3.93  | 0.76  |
| 50024.00 M19 | M-006296- sodium cha   | 11280.00 SCN11A   | 3143.00 | 6.05  | 1.36  |
| 50024.00 M20 | M-018905- sarcoglycar  | 6443.00 SGCB      | 3969.00 | 6.58  | 1.89  |
| 50024.00 M21 | M-006501- sodium cha   | 6332.00 SCN7A     | 2915.00 | 4.36  | 0.33  |
| 50024.00 M23 | M-006503- sodium cha   | 6335.00 SCN9A     | 1011.00 | 1.09  | 3.60  |
| 50024.00 N02 | M-004361- X-ray repai  | 7516.00 XRCC2     | 1305.00 | 7.89  | 3.20  |
| 50024.00 N04 | M-010356- exportin, tf | 11260.00 XPOT     | 2926.00 | 8.00  | 3.31  |
| 50024.00 N05 | M-026112- RAN bindin   | 26953.00 RANBP6   | 2401.00 | 4.54  | 0.15  |
| 50024.00 N06 | M-003030- exportin 1   | 7514.00 XPO1      | 1844.00 | 7.54  | 2.85  |
| 50024.00 N07 | M-012061- RAN bindin   | 10048.00 RANBP9   | 2460.00 | 8.86  | 4.17  |
| 50024.00 N08 | M-016040- xeroderma    | 7508.00 XPC       | 2955.00 | 5.99  | 1.30  |
| 50024.00 N09 | M-010364- RAP1B, me    | 5908.00 RAP1B     | 3823.00 | 13.08 | 8.39  |
| 50024.00 N10 | M-009552- X-box bindi  | 7494.00 XBP1      | 2137.00 | 12.17 | 7.48  |
| 50024.00 N11 | M-009052- RAP2B, me    | 5912.00 RAP2B     | 941.00  | 2.02  | 2.67  |
| 50024.00 N12 | M-017323- Wilms tum    | 9589.00 WTAP      | 1277.00 | 10.02 | 5.33  |
| 50024.00 N13 | M-031919- Ras associa  | 65059.00 RAPH1    | 1250.00 | 12.16 | 7.47  |
| 50024.00 N14 | M-003939- wingless-ty  | 7474.00 WNT5A     | 909.00  | 10.45 | 5.76  |
| 50024.00 N15 | M-004107- raptor       | 57521.00 KIAA1303 | 1422.00 | 2.67  | 2.02  |
| 50024.00 N16 | M-012156- Wolf-Hirscl  | 7469.00 WHSC2     | 2396.00 | 0.63  | 4.06  |
| 50024.00 N17 | M-009925- retinoic aci | 5918.00 RARRES1   | 1364.00 | 1.76  | 2.93  |
| 50024.00 N18 | M-009740- Wolfram sy   | 7466.00 WFS1      | 1776.00 | 7.77  | 3.08  |
| 50024.00 N19 | M-011374- retinoic aci | 5919.00 RARRES2   | 3158.00 | 10.51 | 5.82  |
| 50024.00 N20 | M-013318- WD repeat    | 49856.00 WDR8     | 2891.00 | 10.45 | 5.76  |
| 50024.00 N21 | M-011889- retinoic aci | 5920.00 RARRES3   | 3632.00 | 5.42  | 0.73  |
| 50024.00 N23 | M-008866- RAS p21 pr   | 10156.00 RASA4    | 1625.00 | 2.09  | 2.60  |
| 50024.00 O02 | M-012533- sarcoglycar  | 6442.00 SGCA      | 1763.00 | 4.76  | 0.07  |
| 50024.00 O04 | M-019712- surfactant,  | 6440.00 SFTPC     | 3474.00 | 6.51  | 1.82  |
| 50024.00 O05 | M-011892- SCO cytoch   | 6341.00 SCO1      | 3915.00 | 9.17  | 4.48  |
| 50024.00 O06 | M-019276- surfactant,  | 6439.00 SFTPB     | 5423.00 | 18.83 | 14.14 |
| 50024.00 O07 | M-009398- succinate d  | 6389.00 SDHA      | 3284.00 | 5.57  | 0.88  |
| 50024.00 O08 | M-014615- surfactant,  | 6435.00 SFTPA1    | 1283.00 | 4.75  | 0.06  |
| 50024.00 O09 | M-006305- succinate d  | 6392.00 SDHD      | 2798.00 | 7.36  | 2.67  |
| 50024.00 O10 | M-019838- splicing fac | 9169.00 SFRS2IP   | 1767.00 | 2.83  | 1.86  |
| 50024.00 O11 | M-021125- DEP domai    | 55635.00 DEPDC1   | 1963.00 | 3.31  | 1.38  |
| 50024.00 O12 | M-020070- SET domair   | 9869.00 SETDB1    | 2667.00 | 2.44  | 2.25  |
| 50024.00 O13 | M-010971- exocyst cor  | 10640.00 EXOC5    | 2728.00 | 1.43  | 3.26  |
| 50024.00 O14 | M-020244- sestrin 1    | 27244.00 SESN1    | 3462.00 | 2.43  | 2.26  |

|              |                         |          |          |         |       |      |
|--------------|-------------------------|----------|----------|---------|-------|------|
| 50024.00 O15 | M-012991- SEC31 hom     | 25956.00 | SEC31B   | 2549.00 | 1.80  | 2.89 |
| 50024.00 O16 | M-016371- serpin pept   | 5267.00  | SERPINA4 | 1980.00 | 1.26  | 3.43 |
| 50024.00 O17 | M-020441- SERTA dorr    | 29950.00 | SERTAD1  | 3031.00 | 0.63  | 4.06 |
| 50024.00 O18 | M-009576- serpin pept   | 12.00    | SERPINA3 | 3953.00 | 2.81  | 1.88 |
| 50024.00 O19 | M-004885- sel-1 suppr   | 6400.00  | SEL1L    | 1767.00 | 7.53  | 2.84 |
| 50024.00 O20 | M-012142- small EDRK    | 8293.00  | SERF1A   | 1086.00 | 1.29  | 3.40 |
| 50024.00 O21 | M-008078- selectin L (I | 6402.00  | SELL     | 4165.00 | 11.33 | 6.64 |
| 50024.00 O23 | M-007757- sema dom      | 10512.00 | SEMA3C   | 2655.00 | 5.61  | 0.92 |
| 50024.00 P02 | M-012867- WD repeat     | 23335.00 | WDR7     | 1885.00 | 4.14  | 0.55 |
| 50024.00 P04 | M-013085- WD repeat     | 11180.00 | WDR6     | 1731.00 | 6.01  | 1.32 |
| 50024.00 P05 | M-007767- Ras associa   | 9770.00  | RASSF2   | 650.00  | 10.00 | 5.31 |
| 50024.00 P06 | M-013383- WD repeat     | 11091.00 | WDR5     | 1628.00 | 2.27  | 2.42 |
| 50024.00 P07 | M-020496- retina and    | 30062.00 | RAX      | 1947.00 | 6.63  | 1.94 |
| 50024.00 P08 | M-013491- WD repeat     | 10785.00 | WDR4     | 1381.00 | 7.10  | 2.41 |
| 50024.00 P09 | M-021117- RB1-inducil   | 9821.00  | RB1CC1   | 938.00  | 12.79 | 8.10 |
| 50024.00 P10 | M-012328- WD repeat     | 10885.00 | WDR3     | 4423.00 | 10.83 | 6.14 |
| 50024.00 P11 | M-012137- retinoblast   | 5928.00  | RBBP4    | 2344.00 | 1.88  | 2.81 |
| 50024.00 P12 | M-021319- WD repeat     | 64743.00 | WDR13    | 970.00  | 5.46  | 0.77 |
| 50024.00 P13 | M-012008- retinoblast   | 5929.00  | RBBP5    | 1482.00 | 6.82  | 2.13 |
| 50024.00 P14 | M-012972- WD repeat     | 55759.00 | WDR12    | 1324.00 | 2.87  | 1.82 |
| 50024.00 P15 | M-011375- retinoblast   | 5931.00  | RBBP7    | 1490.00 | 4.70  | 0.01 |
| 50024.00 P16 | M-012887- bromodom      | 55717.00 | BRWD2    | 1968.00 | 10.01 | 5.32 |
| 50024.00 P17 | M-011376- retinoblast   | 5932.00  | RBBP8    | 1073.00 | 4.66  | 0.03 |
| 50024.00 P18 | M-012958- intraflagelli | 55764.00 | IFT122   | 3153.00 | 6.25  | 1.56 |
| 50024.00 P19 | M-017623- retinoblast   | 10741.00 | RBBP9    | 1981.00 | 4.14  | 0.55 |
| 50024.00 P20 | M-011984- WD repeat     | 9948.00  | WDR1     | 1273.00 | 3.46  | 1.23 |
| 50024.00 P21 | M-003298- retinoblast   | 5933.00  | RBL1     | 1734.00 | 5.36  | 0.67 |
| 50024.00 P23 | M-013725- RNA bindin    | 27303.00 | RBMS3    | 1028.00 | 3.50  | 1.19 |
|              |                         |          | mdn      | 1976.50 | 4.69  | 2.10 |
|              |                         |          | 3MAD     |         |       | 6.30 |
|              |                         |          | MADc     |         |       | 3.11 |
| 50024.00 C22 |                         |          |          | 1891.00 | 19.73 |      |
| 50024.00 D22 |                         | 4020.00  | 44.06    |         |       |      |
| 50024.00 E22 |                         |          |          | 2241.00 | 20.75 |      |
| 50024.00 F22 |                         |          |          | 3596.00 | 32.31 |      |
|              |                         |          | mn       | 2576.00 | 24.26 |      |
|              |                         |          | sd       | 900.51  | 6.99  |      |
| 50024.00 G22 |                         |          |          | 1442.00 | 1.46  |      |
| 50024.00 H22 |                         |          |          | 1413.00 | 2.48  |      |
| 50024.00 I22 |                         |          |          | 1930.00 | 2.80  |      |
| 50024.00 J22 |                         |          |          | 1996.00 | 2.15  |      |
|              |                         |          | mn       | 1695.25 | 2.22  |      |
|              |                         |          | sd       | 310.57  | 0.57  |      |
|              |                         |          | 3psSD    |         | 20.97 |      |
|              |                         |          | 3ngSD    |         | 1.72  |      |
|              |                         |          | SumSD    |         | 22.69 |      |



|           |       |
|-----------|-------|
| DiffMn    | 22.04 |
| SmovrDiff | 1.03  |
| 1minus    | -0.03 |

|              |                                   |                   |        |       |
|--------------|-----------------------------------|-------------------|--------|-------|
| 50024.00 I03 | D-001206-∴siControl non-targeting | 4936.00           | 3.06   |       |
| 50024.00 J03 | D-001206-∴siControl non-targeting | 1629.00           | 1.72   |       |
| 50024.00 K03 | D-001600-(∴siGLO RISC-free siRNA  | 5809.00           | 10.78  |       |
| 50024.00 L03 | D-001600-(∴siGLO RISC-free siRNA  | 4616.00           | 10.14  |       |
| 50024.00 H03 | M-003290- polo-like ki            | 5347.00 PLK1 SMAR | 79.00  | 22.79 |
| 50024.00 G03 | M-003290- polo-like ki            | 5347.00 PLK1 SMAR | 291.00 | 17.53 |

| rZ    | Cell Count | % inf | Abs Dev | rZ    | Cell Count | % inf | Abs Dev | rZ    |
|-------|------------|-------|---------|-------|------------|-------|---------|-------|
| -0.86 | 572.00     | 1.05  | 0.74    | -0.49 | 920.00     | 2.28  | 0.57    | -0.30 |
| -0.82 | 1142.00    | 0.00  | 1.79    | -1.19 | 828.00     | 0.24  | 2.61    | -1.38 |
| -0.89 | 2265.00    | 1.02  | 0.77    | -0.51 | 906.00     | 1.99  | 0.86    | -0.46 |
| -0.15 | 2727.00    | 0.15  | 1.64    | -1.09 | 821.00     | 2.07  | 0.78    | -0.41 |
| 2.11  | 1025.00    | 2.05  | 0.26    | 0.17  | 639.00     | 4.38  | 1.53    | 0.81  |
| 0.37  | 2204.00    | 1.23  | 0.57    | -0.37 | 1407.00    | 3.84  | 0.99    | 0.52  |
| 0.24  | 1612.00    | 0.43  | 1.36    | -0.90 | 1338.00    | 3.21  | 0.36    | 0.19  |
| 0.46  | 1669.00    | 1.62  | 0.17    | -0.11 | 1237.00    | 3.07  | 0.22    | 0.12  |
| -0.35 | 1742.00    | 0.23  | 1.56    | -1.04 | 1072.00    | 2.80  | 0.05    | -0.03 |
| 0.20  | 1518.00    | 0.66  | 1.13    | -0.75 | 1189.00    | 1.35  | 1.50    | -0.80 |
| -0.79 | 1247.00    | 1.04  | 0.75    | -0.50 | 795.00     | 4.78  | 1.93    | 1.02  |
| 1.39  | 462.00     | 1.08  | 0.71    | -0.47 | 210.00     | 11.91 | 9.06    | 4.79  |
| -0.56 | 1351.00    | 2.52  | 0.73    | 0.49  | 1382.00    | 1.09  | 1.76    | -0.93 |
| 1.71  | 1919.00    | 7.14  | 5.35    | 3.56  | 682.00     | 4.69  | 1.84    | 0.97  |
| 1.22  | 2564.00    | 6.20  | 4.41    | 2.94  | 1826.00    | 2.96  | 0.11    | 0.06  |
| 0.86  | 3233.00    | 4.27  | 2.48    | 1.65  | 1303.00    | 3.15  | 0.30    | 0.16  |
| -0.92 | 1362.00    | 2.28  | 0.49    | 0.33  | 1027.00    | 1.95  | 0.90    | -0.48 |
| -0.85 | 1472.00    | 2.24  | 0.45    | 0.30  | 1689.00    | 1.07  | 1.78    | -0.94 |
| 0.75  | 1688.00    | 3.55  | 1.76    | 1.18  | 2184.00    | 6.91  | 4.06    | 2.15  |
| 0.59  | 1613.00    | 5.95  | 4.16    | 2.77  | 1185.00    | 2.95  | 0.10    | 0.05  |
| -1.20 | 2206.00    | 1.54  | 0.25    | -0.16 | 1352.00    | 4.44  | 1.59    | 0.84  |
| -0.43 | 3346.00    | 1.67  | 0.12    | -0.08 | 3046.00    | 4.10  | 1.25    | 0.66  |
| -1.45 | 1697.00    | 1.18  | 0.61    | -0.41 | 616.00     | 3.41  | 0.56    | 0.29  |
| -1.00 | 2378.00    | 1.01  | 0.78    | -0.52 | 1569.00    | 1.27  | 1.58    | -0.83 |
| -0.97 | 821.00     | 0.97  | 0.82    | -0.54 | 1570.00    | 2.17  | 0.68    | -0.36 |
| -1.26 | 2062.00    | 0.29  | 1.50    | -1.00 | 1497.00    | 2.34  | 0.51    | -0.27 |
| -0.98 | 4490.00    | 2.03  | 0.24    | 0.16  | 1324.00    | 2.49  | 0.36    | -0.19 |
| -1.08 | 2212.00    | 1.85  | 0.06    | 0.04  | 2142.00    | 6.07  | 3.22    | 1.70  |
| 0.04  | 2862.00    | 5.49  | 3.70    | 2.46  | 3327.00    | 5.68  | 2.83    | 1.50  |
| -1.41 | 1641.00    | 0.79  | 1.00    | -0.66 | 970.00     | 1.65  | 1.20    | -0.64 |
| 0.00  | 1487.00    | 0.00  | 1.79    | -1.19 | 2481.00    | 0.56  | 2.29    | -1.21 |
| 0.84  | 1739.00    | 0.00  | 1.79    | -1.19 | 1283.00    | 2.34  | 0.51    | -0.27 |
| -0.20 | 2636.00    | 0.00  | 1.79    | -1.19 | 1431.00    | 2.31  | 0.54    | -0.29 |
| -0.07 | 2408.00    | 0.37  | 1.42    | -0.94 | 1227.00    | 1.96  | 0.89    | -0.47 |
| 0.34  | 2734.00    | 0.51  | 1.28    | -0.85 | 1512.00    | 0.60  | 2.25    | -1.19 |
| 0.11  | 3970.00    | 0.60  | 1.19    | -0.79 | 2577.00    | 0.66  | 2.19    | -1.16 |
| 3.63  | 3282.00    | 1.89  | 0.10    | 0.07  | 1609.00    | 1.62  | 1.23    | -0.65 |
| 2.64  | 2228.00    | 1.30  | 0.49    | -0.32 | 1529.00    | 2.81  | 0.04    | -0.02 |
| 1.96  | 4119.00    | 2.14  | 0.35    | 0.23  | 1383.00    | 2.75  | 0.10    | -0.06 |
| -0.31 | 2072.00    | 0.24  | 1.55    | -1.03 | 1291.00    | 1.01  | 1.84    | -0.98 |
| -0.15 | 1526.00    | 0.46  | 1.33    | -0.88 | 717.00     | 2.79  | 0.06    | -0.03 |
| -0.25 | 2497.00    | 1.52  | 0.27    | -0.18 | 691.00     | 3.47  | 0.62    | 0.33  |
| -0.43 | 3967.00    | 0.73  | 1.06    | -0.70 | 1655.00    | 1.63  | 1.22    | -0.65 |
| -0.43 | 2291.00    | 0.52  | 1.27    | -0.84 | 1961.00    | 2.65  | 0.20    | -0.11 |
| -0.33 | 3374.00    | 0.39  | 1.40    | -0.93 | 1419.00    | 2.54  | 0.31    | -0.17 |
| -0.53 | 2003.00    | 0.20  | 1.59    | -1.06 | 992.00     | 1.51  | 1.34    | -0.71 |

|       |         |      |      |       |         |      |      |       |
|-------|---------|------|------|-------|---------|------|------|-------|
| -0.57 | 1192.00 | 0.00 | 1.79 | -1.19 | 1064.00 | 4.04 | 1.19 | 0.63  |
| -0.22 | 1424.00 | 0.14 | 1.65 | -1.10 | 1181.00 | 1.86 | 0.99 | -0.52 |
| -0.87 | 1507.00 | 0.20 | 1.59 | -1.06 | 1481.00 | 2.70 | 0.15 | -0.08 |
| -0.95 | 2632.00 | 0.15 | 1.64 | -1.09 | 2647.00 | 4.34 | 1.49 | 0.79  |
| -0.32 | 3668.00 | 1.88 | 0.09 | 0.06  | 1432.00 | 0.35 | 2.50 | -1.32 |
| 0.66  | 2676.00 | 0.45 | 1.34 | -0.89 | 1727.00 | 2.55 | 0.30 | -0.16 |
| -0.81 | 3337.00 | 0.27 | 1.52 | -1.01 | 1881.00 | 0.43 | 2.42 | -1.28 |
| 0.92  | 4293.00 | 1.28 | 0.51 | -0.34 | 2002.00 | 2.95 | 0.10 | 0.05  |
| 0.12  | 1558.00 | 0.77 | 1.02 | -0.68 | 1126.00 | 2.66 | 0.19 | -0.10 |
| 1.37  | 3507.00 | 1.06 | 0.74 | -0.49 | 1247.00 | 2.25 | 0.60 | -0.32 |
| -0.08 | 2234.00 | 0.27 | 1.52 | -1.01 | 1347.00 | 2.08 | 0.77 | -0.41 |
| 1.20  | 3246.00 | 3.36 | 1.57 | 1.05  | 918.00  | 6.54 | 3.69 | 1.95  |
| -0.28 | 3008.00 | 0.86 | 0.93 | -0.61 | 1111.00 | 3.51 | 0.66 | 0.35  |
| -0.44 | 2490.00 | 1.37 | 0.42 | -0.28 | 2214.00 | 4.56 | 1.71 | 0.90  |
| 1.73  | 3465.00 | 2.97 | 1.18 | 0.79  | 3367.00 | 2.05 | 0.80 | -0.42 |
| 0.44  | 1307.00 | 2.14 | 0.35 | 0.24  | 1131.00 | 3.45 | 0.60 | 0.32  |
| -0.33 | 1654.00 | 2.18 | 0.39 | 0.26  | 788.00  | 2.28 | 0.57 | -0.30 |
| 0.26  | 2435.00 | 0.90 | 0.89 | -0.59 | 1600.00 | 0.56 | 2.29 | -1.21 |
| 0.18  | 2314.00 | 1.17 | 0.62 | -0.41 | 1225.00 | 1.31 | 1.54 | -0.82 |
| 1.00  | 2865.00 | 1.71 | 0.08 | -0.05 | 1018.00 | 2.16 | 0.69 | -0.37 |
| 0.51  | 4382.00 | 2.88 | 1.09 | 0.72  | 1693.00 | 1.77 | 1.08 | -0.57 |
| 0.99  | 4268.00 | 3.54 | 1.75 | 1.17  | 1767.00 | 2.60 | 0.25 | -0.13 |
| 1.13  | 2579.00 | 2.48 | 0.69 | 0.46  | 650.00  | 3.23 | 0.38 | 0.20  |
| 0.87  | 839.00  | 0.72 | 1.07 | -0.71 | 372.00  | 1.34 | 1.51 | -0.80 |
| 0.67  | 1999.00 | 1.80 | 0.01 | 0.01  | 1049.00 | 4.00 | 1.15 | 0.61  |
| 0.79  | 1265.00 | 1.90 | 0.11 | 0.07  | 1120.00 | 4.46 | 1.61 | 0.85  |
| 1.28  | 637.00  | 1.41 | 0.38 | -0.25 | 387.00  | 1.55 | 1.30 | -0.69 |
| 0.10  | 2941.00 | 1.29 | 0.50 | -0.33 | 2831.00 | 1.84 | 1.01 | -0.54 |
| 2.05  | 648.00  | 0.77 | 1.02 | -0.68 | 491.00  | 1.22 | 1.63 | -0.86 |
| -0.51 | 2168.00 | 0.23 | 1.56 | -1.04 | 1811.00 | 0.77 | 2.08 | -1.10 |
| 0.82  | 1159.00 | 1.73 | 0.06 | -0.04 | 668.00  | 0.45 | 2.40 | -1.27 |
| 0.28  | 3497.00 | 5.06 | 3.27 | 2.18  | 1473.00 | 2.44 | 0.41 | -0.22 |
| 0.02  | 592.00  | 1.18 | 0.61 | -0.40 | 574.00  | 0.35 | 2.50 | -1.32 |
| -0.76 | 586.00  | 1.54 | 0.25 | -0.17 | 777.00  | 0.39 | 2.46 | -1.30 |
| -0.51 | 3197.00 | 3.50 | 1.71 | 1.14  | 2026.00 | 2.67 | 0.18 | -0.10 |
| 1.27  | 1581.00 | 0.76 | 1.03 | -0.68 | 412.00  | 2.18 | 0.67 | -0.35 |
| -0.12 | 2372.00 | 0.72 | 1.07 | -0.71 | 1889.00 | 0.90 | 1.95 | -1.03 |
| -0.26 | 2910.00 | 1.13 | 0.66 | -0.43 | 829.00  | 3.02 | 0.17 | 0.09  |
| -0.36 | 1178.00 | 1.10 | 0.69 | -0.45 | 1110.00 | 0.99 | 1.86 | -0.98 |
| 0.43  | 2956.00 | 1.52 | 0.27 | -0.18 | 2140.00 | 1.17 | 1.68 | -0.89 |
| -0.72 | 2309.00 | 2.34 | 0.55 | 0.37  | 1271.00 | 0.71 | 2.14 | -1.13 |
| 0.10  | 3022.00 | 1.65 | 0.14 | -0.09 | 1986.00 | 1.01 | 1.84 | -0.98 |
| -0.70 | 2038.00 | 0.98 | 0.81 | -0.54 | 1340.00 | 1.04 | 1.81 | -0.96 |
| -0.59 | 1578.00 | 1.01 | 0.78 | -0.51 | 2168.00 | 1.52 | 1.33 | -0.70 |
| 1.73  | 2718.00 | 2.10 | 0.31 | 0.21  | 2356.00 | 1.06 | 1.79 | -0.95 |
| 0.15  | 1788.00 | 1.57 | 0.22 | -0.15 | 1454.00 | 0.41 | 2.44 | -1.29 |
| 1.09  | 520.00  | 2.50 | 0.71 | 0.47  | 574.00  | 0.17 | 2.68 | -1.42 |

|       |         |       |      |       |         |       |      |       |
|-------|---------|-------|------|-------|---------|-------|------|-------|
| -0.24 | 1226.00 | 0.90  | 0.89 | -0.59 | 1578.00 | 0.38  | 2.47 | -1.31 |
| 2.70  | 667.00  | 2.70  | 0.91 | 0.61  | 611.00  | 0.65  | 2.20 | -1.16 |
| 0.54  | 2150.00 | 2.47  | 0.68 | 0.45  | 1855.00 | 0.97  | 1.88 | -1.00 |
| -0.07 | 1724.00 | 3.42  | 1.63 | 1.09  | 1321.00 | 0.61  | 2.24 | -1.19 |
| -0.32 | 1688.00 | 0.53  | 1.26 | -0.83 | 1385.00 | 1.23  | 1.62 | -0.86 |
| 1.11  | 406.00  | 3.45  | 1.66 | 1.11  | 509.00  | 1.77  | 1.08 | -0.57 |
| 0.41  | 1173.00 | 1.62  | 0.17 | -0.11 | 1599.00 | 1.06  | 1.79 | -0.95 |
| 1.49  | 268.00  | 4.85  | 3.06 | 2.04  | 221.00  | 4.07  | 1.22 | 0.65  |
| 0.58  | 2303.00 | 3.34  | 1.55 | 1.04  | 1452.00 | 0.96  | 1.89 | -1.00 |
| 0.81  | 2465.00 | 1.54  | 0.25 | -0.16 | 1923.00 | 2.60  | 0.25 | -0.13 |
| -0.26 | 2017.00 | 2.13  | 0.34 | 0.23  | 1491.00 | 1.48  | 1.37 | -0.73 |
| 11.80 | 132.00  | 8.33  | 6.54 | 4.36  | 99.00   | 12.12 | 9.27 | 4.90  |
| -1.11 | 1975.00 | 4.10  | 2.31 | 1.54  | 2093.00 | 1.82  | 1.03 | -0.55 |
| 1.70  | 634.00  | 3.31  | 1.52 | 1.02  | 362.00  | 8.56  | 5.71 | 3.02  |
| -0.49 | 885.00  | 4.29  | 2.50 | 1.67  | 1115.00 | 2.69  | 0.16 | -0.09 |
| 0.34  | 821.00  | 2.80  | 1.01 | 0.68  | 812.00  | 1.72  | 1.13 | -0.60 |
| -0.63 | 1640.00 | 4.39  | 2.60 | 1.73  | 1519.00 | 3.95  | 1.10 | 0.58  |
| -0.87 | 2700.00 | 0.33  | 1.46 | -0.97 | 2410.00 | 2.45  | 0.40 | -0.21 |
| -0.95 | 1288.00 | 0.85  | 0.94 | -0.62 | 891.00  | 5.61  | 2.76 | 1.46  |
| -0.07 | 2466.00 | 2.68  | 0.89 | 0.59  | 1843.00 | 2.55  | 0.30 | -0.16 |
| 0.20  | 1409.00 | 2.56  | 0.77 | 0.51  | 1445.00 | 4.50  | 1.65 | 0.87  |
| -0.39 | 1216.00 | 2.22  | 0.43 | 0.29  | 768.00  | 4.82  | 1.97 | 1.04  |
| 1.34  | 2420.00 | 5.79  | 4.00 | 2.66  | 1580.00 | 4.56  | 1.71 | 0.90  |
| 0.69  | 1918.00 | 3.08  | 1.29 | 0.86  | 1319.00 | 5.38  | 2.53 | 1.34  |
| 0.14  | 736.00  | 2.72  | 0.93 | 0.62  | 431.00  | 6.03  | 3.18 | 1.68  |
| -1.18 | 2676.00 | 1.23  | 0.56 | -0.37 | 1395.00 | 2.44  | 0.41 | -0.22 |
| -0.88 | 2615.00 | 4.93  | 3.14 | 2.09  | 2532.00 | 2.73  | 0.12 | -0.07 |
| -0.60 | 2991.00 | 1.97  | 0.18 | 0.12  | 1722.00 | 4.70  | 1.85 | 0.98  |
| 1.23  | 1756.00 | 5.35  | 3.56 | 2.37  | 1675.00 | 8.78  | 5.93 | 3.13  |
| -0.63 | 3463.00 | 2.14  | 0.35 | 0.23  | 2035.00 | 5.06  | 2.21 | 1.17  |
| -0.86 | 1308.00 | 2.45  | 0.66 | 0.44  | 1437.00 | 5.01  | 2.16 | 1.14  |
| 0.17  | 1468.00 | 0.68  | 1.11 | -0.74 | 2199.00 | 10.10 | 7.25 | 3.83  |
| 1.43  | 2374.00 | 4.17  | 2.38 | 1.59  | 2286.00 | 5.12  | 2.27 | 1.20  |
| 0.19  | 1127.00 | 2.57  | 0.78 | 0.52  | 958.00  | 6.79  | 3.94 | 2.08  |
| 0.72  | 1067.00 | 7.69  | 5.90 | 3.93  | 1896.00 | 7.81  | 4.96 | 2.62  |
| -1.14 | 2159.00 | 1.25  | 0.54 | -0.36 | 1405.00 | 3.13  | 0.28 | 0.15  |
| 0.11  | 607.00  | 8.40  | 6.61 | 4.40  | 807.00  | 3.22  | 0.37 | 0.20  |
| -0.97 | 900.00  | 1.44  | 0.35 | -0.23 | 754.00  | 4.38  | 1.53 | 0.81  |
| 1.90  | 1079.00 | 9.27  | 7.48 | 4.98  | 2273.00 | 11.31 | 8.46 | 4.47  |
| -0.50 | 1276.00 | 3.29  | 1.50 | 1.00  | 1889.00 | 5.45  | 2.60 | 1.37  |
| 2.01  | 954.00  | 10.17 | 8.38 | 5.58  | 1432.00 | 4.96  | 2.11 | 1.11  |
| -0.48 | 908.00  | 2.31  | 0.52 | 0.35  | 881.00  | 1.82  | 1.03 | -0.55 |
| -0.47 | 622.00  | 0.64  | 1.15 | -0.76 | 861.00  | 2.67  | 0.18 | -0.10 |
| -0.68 | 1061.00 | 1.79  | 0.00 | 0.00  | 1487.00 | 4.04  | 1.19 | 0.63  |
| -0.78 | 2058.00 | 1.99  | 0.20 | 0.14  | 1753.00 | 2.68  | 0.17 | -0.09 |
| 0.84  | 2093.00 | 5.83  | 4.04 | 2.69  | 2276.00 | 5.71  | 2.86 | 1.51  |
| -0.39 | 807.00  | 2.97  | 1.18 | 0.79  | 1294.00 | 3.79  | 0.94 | 0.49  |

|       |         |      |      |       |         |      |      |       |
|-------|---------|------|------|-------|---------|------|------|-------|
| 0.95  | 2294.00 | 1.53 | 0.26 | -0.17 | 2933.00 | 4.33 | 1.48 | 0.78  |
| -0.91 | 884.00  | 0.23 | 1.56 | -1.04 | 1833.00 | 0.60 | 2.25 | -1.19 |
| -0.23 | 1433.00 | 0.63 | 1.16 | -0.77 | 1851.00 | 1.78 | 1.07 | -0.57 |
| -0.60 | 916.00  | 1.31 | 0.48 | -0.32 | 974.00  | 1.64 | 1.21 | -0.64 |
| 0.68  | 976.00  | 1.54 | 0.25 | -0.17 | 855.00  | 1.99 | 0.86 | -0.46 |
| 1.31  | 1757.00 | 3.93 | 2.14 | 1.42  | 1830.00 | 1.75 | 1.10 | -0.58 |
| 1.32  | 1231.00 | 3.49 | 1.70 | 1.14  | 1782.00 | 4.99 | 2.14 | 1.13  |
| 2.89  | 4179.00 | 4.91 | 3.12 | 2.08  | 3626.00 | 3.03 | 0.18 | 0.10  |
| -0.47 | 1767.00 | 3.51 | 1.72 | 1.15  | 2384.00 | 1.76 | 1.09 | -0.58 |
| -0.68 | 1560.00 | 1.35 | 0.44 | -0.29 | 1910.00 | 0.63 | 2.22 | -1.18 |
| -0.44 | 2151.00 | 1.95 | 0.16 | 0.11  | 2362.00 | 2.07 | 0.78 | -0.41 |
| -0.24 | 2591.00 | 7.49 | 5.70 | 3.79  | 1469.00 | 2.38 | 0.47 | -0.25 |
| 0.77  | 2018.00 | 5.01 | 3.22 | 2.14  | 1586.00 | 3.34 | 0.49 | 0.26  |
| 0.08  | 1455.00 | 1.44 | 0.35 | -0.23 | 2371.00 | 1.73 | 1.12 | -0.59 |
| -0.80 | 1977.00 | 2.83 | 1.04 | 0.70  | 2350.00 | 1.57 | 1.28 | -0.68 |
| -0.62 | 735.00  | 4.76 | 2.97 | 1.98  | 1968.00 | 2.24 | 0.61 | -0.33 |
| 0.67  | 294.00  | 7.82 | 6.03 | 4.02  | 422.00  | 3.79 | 0.94 | 0.50  |
| -0.68 | 505.00  | 6.53 | 4.74 | 3.16  | 1426.00 | 3.44 | 0.59 | 0.31  |
| -0.81 | 1677.00 | 1.91 | 0.12 | 0.08  | 1865.00 | 2.63 | 0.22 | -0.12 |
| 0.15  | 843.00  | 2.97 | 1.18 | 0.78  | 962.00  | 4.05 | 1.20 | 0.64  |
| 0.47  | 1699.00 | 4.18 | 2.39 | 1.59  | 1521.00 | 2.70 | 0.15 | -0.08 |
| -0.18 | 453.00  | 6.84 | 5.05 | 3.37  | 682.00  | 3.52 | 0.67 | 0.35  |
| -0.74 | 1193.00 | 4.36 | 2.57 | 1.71  | 2133.00 | 3.28 | 0.43 | 0.23  |
| -0.32 | 453.00  | 1.99 | 0.20 | 0.13  | 464.00  | 2.37 | 0.48 | -0.25 |
| -0.03 | 1114.00 | 3.14 | 1.35 | 0.90  | 3562.00 | 6.93 | 4.08 | 2.16  |
| -0.56 | 1287.00 | 2.95 | 1.16 | 0.78  | 1045.00 | 1.53 | 1.32 | -0.70 |
| 1.40  | 2815.00 | 3.84 | 2.05 | 1.36  | 2388.00 | 2.85 | 0.00 | 0.00  |
| 0.87  | 2124.00 | 5.46 | 3.67 | 2.45  | 2255.00 | 3.19 | 0.34 | 0.18  |
| -1.00 | 1412.00 | 1.98 | 0.19 | 0.13  | 2155.00 | 0.79 | 2.06 | -1.09 |
| -0.76 | 1449.00 | 0.62 | 1.17 | -0.78 | 1223.00 | 1.14 | 1.71 | -0.90 |
| 1.28  | 3152.00 | 4.70 | 2.91 | 1.94  | 3775.00 | 6.97 | 4.12 | 2.18  |
| 0.40  | 2068.00 | 2.66 | 0.87 | 0.58  | 3301.00 | 2.79 | 0.06 | -0.03 |
| 2.10  | 2776.00 | 6.77 | 4.98 | 3.32  | 4823.00 | 8.79 | 5.94 | 3.14  |
| 0.67  | 1899.00 | 2.95 | 1.16 | 0.77  | 3392.00 | 4.63 | 1.78 | 0.94  |
| 0.36  | 1352.00 | 2.88 | 1.09 | 0.73  | 1758.00 | 2.84 | 0.01 | 0.00  |
| -0.72 | 1067.00 | 1.31 | 0.48 | -0.32 | 1481.00 | 2.09 | 0.76 | -0.40 |
| 2.61  | 1028.00 | 2.04 | 0.25 | 0.17  | 963.00  | 4.88 | 2.03 | 1.07  |
| 0.21  | 1048.00 | 2.96 | 1.17 | 0.78  | 2292.00 | 5.50 | 2.65 | 1.40  |
| 1.65  | 1675.00 | 4.30 | 2.51 | 1.67  | 3989.00 | 3.74 | 0.89 | 0.47  |
| 0.23  | 774.00  | 6.20 | 4.41 | 2.94  | 1571.00 | 4.65 | 1.80 | 0.95  |
| -0.29 | 1832.00 | 2.13 | 0.34 | 0.23  | 3051.00 | 5.05 | 2.20 | 1.16  |
| -0.13 | 2497.00 | 2.28 | 0.49 | 0.33  | 2217.00 | 2.71 | 0.14 | -0.08 |
| -0.14 | 2619.00 | 0.34 | 1.45 | -0.96 | 2352.00 | 3.87 | 1.02 | 0.54  |
| 1.19  | 1790.00 | 2.23 | 0.44 | 0.30  | 2056.00 | 6.32 | 3.47 | 1.84  |
| -0.55 | 1047.00 | 1.05 | 0.74 | -0.49 | 1431.00 | 1.89 | 0.96 | -0.51 |
| -0.57 | 1381.00 | 1.23 | 0.56 | -0.37 | 2313.00 | 0.69 | 2.16 | -1.14 |
| -0.66 | 2212.00 | 1.54 | 0.25 | -0.17 | 3349.00 | 2.42 | 0.43 | -0.23 |

|       |         |      |      |       |         |       |       |       |
|-------|---------|------|------|-------|---------|-------|-------|-------|
| 0.79  | 1861.00 | 2.36 | 0.57 | 0.38  | 1601.00 | 1.94  | 0.91  | -0.48 |
| -0.56 | 787.00  | 0.76 | 1.03 | -0.68 | 1390.00 | 2.30  | 0.55  | -0.29 |
| 0.04  | 2033.00 | 1.77 | 0.02 | -0.01 | 2371.00 | 4.01  | 1.16  | 0.61  |
| -0.26 | 1690.00 | 2.49 | 0.70 | 0.46  | 2369.00 | 5.61  | 2.76  | 1.46  |
| -0.60 | 438.00  | 2.74 | 0.95 | 0.63  | 1240.00 | 5.08  | 2.23  | 1.18  |
| -0.91 | 1002.00 | 0.70 | 1.09 | -0.72 | 1015.00 | 2.86  | 0.01  | 0.00  |
| -0.05 | 1157.00 | 1.12 | 0.67 | -0.44 | 1828.00 | 4.16  | 1.31  | 0.69  |
| -0.14 | 2118.00 | 1.56 | 0.23 | -0.15 | 2745.00 | 3.68  | 0.83  | 0.44  |
| -0.95 | 877.00  | 0.23 | 1.56 | -1.04 | 1068.00 | 2.43  | 0.42  | -0.22 |
| -0.84 | 1087.00 | 0.92 | 0.87 | -0.58 | 1489.00 | 5.17  | 2.32  | 1.23  |
| -0.24 | 915.00  | 1.86 | 0.07 | 0.05  | 2062.00 | 4.32  | 1.47  | 0.77  |
| 0.44  | 2617.00 | 2.98 | 1.19 | 0.79  | 2698.00 | 12.90 | 10.05 | 5.31  |
| 0.61  | 2446.00 | 2.45 | 0.66 | 0.44  | 3618.00 | 7.57  | 4.72  | 2.50  |
| -0.11 | 1565.00 | 2.88 | 1.09 | 0.72  | 2289.00 | 3.41  | 0.56  | 0.29  |
| -1.16 | 1410.00 | 0.28 | 1.51 | -1.00 | 1498.00 | 5.21  | 2.36  | 1.24  |
| 1.03  | 1374.00 | 0.00 | 1.79 | -1.19 | 1577.00 | 3.04  | 0.19  | 0.10  |
| 1.06  | 1730.00 | 0.12 | 1.67 | -1.11 | 3195.00 | 4.44  | 1.59  | 0.84  |
| -0.05 | 1729.00 | 1.39 | 0.40 | -0.27 | 2782.00 | 2.88  | 0.03  | 0.01  |
| 0.92  | 996.00  | 0.60 | 1.19 | -0.79 | 2238.00 | 2.55  | 0.30  | -0.16 |
| 1.34  | 1491.00 | 1.68 | 0.11 | -0.07 | 2397.00 | 4.13  | 1.28  | 0.68  |
| 0.42  | 1393.00 | 2.37 | 0.58 | 0.39  | 2695.00 | 1.78  | 1.07  | -0.57 |
| 2.70  | 1996.00 | 1.60 | 0.19 | -0.12 | 3105.00 | 3.16  | 0.31  | 0.16  |
| 2.40  | 1503.00 | 1.60 | 0.19 | -0.13 | 2547.00 | 6.79  | 3.94  | 2.08  |
| -0.86 | 514.00  | 1.17 | 0.62 | -0.41 | 906.00  | 4.86  | 2.01  | 1.06  |
| 1.71  | 596.00  | 0.00 | 1.79 | -1.19 | 869.00  | 7.02  | 4.17  | 2.20  |
| 2.40  | 1066.00 | 0.84 | 0.95 | -0.63 | 793.00  | 6.31  | 3.46  | 1.83  |
| 1.85  | 689.00  | 2.03 | 0.24 | 0.16  | 1901.00 | 8.78  | 5.93  | 3.14  |
| -0.65 | 663.00  | 0.60 | 1.19 | -0.79 | 1440.00 | 3.89  | 1.04  | 0.55  |
| -1.31 | 1751.00 | 0.57 | 1.22 | -0.81 | 2591.00 | 2.32  | 0.53  | -0.28 |
| -0.94 | 720.00  | 0.00 | 1.79 | -1.19 | 1059.00 | 1.23  | 1.62  | -0.86 |
| 0.99  | 1693.00 | 0.00 | 1.79 | -1.19 | 2213.00 | 1.04  | 1.81  | -0.96 |
| 1.87  | 3042.00 | 0.56 | 1.23 | -0.82 | 4264.00 | 5.82  | 2.97  | 1.57  |
| 1.85  | 2024.00 | 1.09 | 0.70 | -0.47 | 2546.00 | 6.52  | 3.67  | 1.94  |
| 0.24  | 3281.00 | 0.55 | 1.24 | -0.82 | 3572.00 | 1.76  | 1.09  | -0.58 |
| -0.84 | 977.00  | 0.10 | 1.69 | -1.12 | 1377.00 | 1.60  | 1.25  | -0.66 |
| 0.02  | 837.00  | 1.67 | 0.12 | -0.08 | 847.00  | 3.07  | 0.22  | 0.11  |
| 0.58  | 2549.00 | 2.04 | 0.25 | 0.17  | 3597.00 | 4.31  | 1.46  | 0.77  |
| 1.44  | 2183.00 | 4.90 | 3.11 | 2.07  | 2649.00 | 5.74  | 2.89  | 1.53  |
| 4.55  | 3052.00 | 9.11 | 7.32 | 4.87  | 3153.00 | 11.32 | 8.47  | 4.48  |
| 0.28  | 2106.00 | 7.22 | 5.43 | 3.62  | 2779.00 | 4.64  | 1.79  | 0.95  |
| 0.02  | 1012.00 | 2.27 | 0.48 | 0.32  | 1014.00 | 2.96  | 0.11  | 0.06  |
| 0.86  | 1249.00 | 3.12 | 1.33 | 0.89  | 1719.00 | 6.75  | 3.90  | 2.06  |
| -0.60 | 1091.00 | 3.30 | 1.51 | 1.01  | 1429.00 | 3.43  | 0.58  | 0.30  |
| -0.44 | 1289.00 | 3.72 | 1.93 | 1.29  | 1675.00 | 5.97  | 3.12  | 1.65  |
| -0.73 | 1300.00 | 1.15 | 0.64 | -0.42 | 2307.00 | 4.85  | 2.00  | 1.06  |
| -1.05 | 1397.00 | 3.79 | 2.00 | 1.34  | 2253.00 | 2.53  | 0.32  | -0.17 |
| -0.73 | 1830.00 | 2.35 | 0.56 | 0.37  | 3035.00 | 3.92  | 1.07  | 0.57  |

|       |         |      |      |       |         |      |      |       |
|-------|---------|------|------|-------|---------|------|------|-------|
| -0.93 | 1083.00 | 3.69 | 1.90 | 1.27  | 2066.00 | 3.58 | 0.73 | 0.39  |
| -1.10 | 729.00  | 1.78 | 0.01 | 0.00  | 1220.00 | 1.72 | 1.13 | -0.60 |
| -1.31 | 1319.00 | 1.82 | 0.03 | 0.02  | 2008.00 | 2.34 | 0.51 | -0.27 |
| -0.61 | 3048.00 | 1.67 | 0.12 | -0.08 | 4365.00 | 3.71 | 0.86 | 0.45  |
| 0.91  | 1035.00 | 2.42 | 0.63 | 0.42  | 1892.00 | 3.38 | 0.53 | 0.28  |
| -1.09 | 1026.00 | 2.34 | 0.55 | 0.37  | 999.00  | 2.30 | 0.55 | -0.29 |
| 2.14  | 2455.00 | 6.19 | 4.40 | 2.93  | 2397.00 | 8.26 | 5.41 | 2.86  |
| 0.30  | 2379.00 | 4.16 | 2.37 | 1.58  | 2529.00 | 9.57 | 6.72 | 3.55  |
| -0.18 | 2190.00 | 1.19 | 0.60 | -0.40 | 1559.00 | 5.77 | 2.92 | 1.54  |
| 0.42  | 1627.00 | 0.55 | 1.24 | -0.82 | 1512.00 | 2.78 | 0.07 | -0.04 |
| 1.71  | 451.00  | 1.55 | 0.24 | -0.16 | 638.00  | 8.62 | 5.77 | 3.05  |
| -0.78 | 1307.00 | 0.31 | 1.48 | -0.99 | 1028.00 | 2.82 | 0.03 | -0.02 |
| 0.62  | 1518.00 | 0.46 | 1.33 | -0.88 | 1608.00 | 6.09 | 3.24 | 1.71  |
| 0.77  | 964.00  | 0.31 | 1.48 | -0.98 | 898.00  | 5.57 | 2.72 | 1.44  |
| 2.61  | 840.00  | 2.02 | 0.23 | 0.16  | 1565.00 | 7.16 | 4.31 | 2.28  |
| 1.97  | 4385.00 | 6.55 | 4.76 | 3.17  | 5139.00 | 9.90 | 7.05 | 3.73  |
| -0.91 | 1531.00 | 0.00 | 1.79 | -1.19 | 2794.00 | 1.79 | 1.06 | -0.56 |
| 0.25  | 403.00  | 1.49 | 0.30 | -0.20 | 997.00  | 4.51 | 1.66 | 0.88  |
| 0.68  | 1322.00 | 2.57 | 0.78 | 0.52  | 1666.00 | 5.28 | 2.43 | 1.28  |
| -0.59 | 944.00  | 1.48 | 0.31 | -0.20 | 1745.00 | 1.89 | 0.96 | -0.51 |
| 0.00  | 654.00  | 1.22 | 0.57 | -0.38 | 2566.00 | 4.56 | 1.71 | 0.90  |
| 1.71  | 1113.00 | 1.80 | 0.01 | 0.01  | 1819.00 | 4.73 | 1.88 | 0.99  |
| -0.01 | 1178.00 | 4.24 | 2.45 | 1.64  | 1585.00 | 4.61 | 1.76 | 0.93  |
| 0.50  | 1555.00 | 1.61 | 0.18 | -0.12 | 3221.00 | 1.21 | 1.64 | -0.87 |
| -0.18 | 1115.00 | 1.97 | 0.18 | 0.12  | 854.00  | 6.32 | 3.47 | 1.84  |
| -0.40 | 1022.00 | 1.47 | 0.32 | -0.21 | 1328.00 | 3.24 | 0.39 | 0.20  |
| 0.22  | 2365.00 | 1.99 | 0.20 | 0.13  | 2341.00 | 5.55 | 2.70 | 1.43  |
| -0.38 | 1267.00 | 1.03 | 0.76 | -0.51 | 532.00  | 2.63 | 0.22 | -0.12 |
|       | 1633.50 | 1.79 | 1.01 |       | 1562.00 | 2.85 | 1.28 |       |
|       |         |      | 3.04 |       |         |      | 3.83 |       |
|       |         |      | 1.50 |       |         |      | 1.89 |       |

|         |       |         |       |
|---------|-------|---------|-------|
| 5405.00 | 32.36 | 6603.00 | 36.33 |
| 5878.00 | 37.84 | 5178.00 | 34.26 |
| 3215.00 | 21.37 | 2777.00 | 16.89 |
| 4195.00 | 24.32 | 3508.00 | 19.47 |
| 4673.25 | 28.97 | 4516.50 | 26.74 |
| 1203.07 | 7.52  | 1716.00 | 9.97  |
| 1590.00 | 1.57  | 1627.00 | 2.70  |
| 2229.00 | 1.70  | 813.00  | 2.34  |
| 1328.00 | 3.77  | 1908.00 | 2.31  |
| 3682.00 | 2.42  | 3805.00 | 2.86  |
| 2207.25 | 2.36  | 2038.25 | 2.55  |
| 1053.48 | 1.00  | 1266.06 | 0.28  |
|         | 22.55 |         | 29.92 |
|         | 3.01  |         | 0.83  |
|         | 25.57 |         | 30.75 |

|       |       |
|-------|-------|
| 26.60 | 24.18 |
| 0.96  | 1.27  |
| 0.04  | -0.27 |

|         |      |         |       |
|---------|------|---------|-------|
| 1247.00 | 0.56 | 1648.00 | 4.61  |
| 1242.00 | 1.93 | 1552.00 | 3.03  |
| 4363.00 | 9.70 | 5436.00 | 9.77  |
| 5403.00 | 6.11 | 4728.00 | 8.78  |
| 100.00  | 2.00 | 75.00   | 17.33 |
| 153.00  | 5.23 | 149.00  | 0.67  |







x      toxic a,b,c

y

x      toxic,b,c

y

y

y

y

x      debris b,c

y

y

x      tox a,b,c  
y

| Plate    | Well | Gene                    | GeneID          | Cell Count | % inf | Abs Dev |
|----------|------|-------------------------|-----------------|------------|-------|---------|
| 50047.00 | A02  | M-019509- CD52 mole     | 1043.00 CD52    | 1191.00    | 0.92  | 1.66    |
| 50047.00 | A04  | M-008680- CDP-diacylg   | 1040.00 CDS1    | 3814.00    | 4.61  | 2.03    |
| 50047.00 | A05  | M-011191- alpha-1-B g   | 1.00 A1BG       | 1271.00    | 1.18  | 1.40    |
| 50047.00 | A06  | M-010336- cysteine di   | 1036.00 CDO1    | 2545.00    | 2.40  | 0.18    |
| 50047.00 | A07  | M-010380- arylalkylam   | 15.00 AANAT     | 1553.00    | 2.19  | 0.39    |
| 50047.00 | A08  | M-012630- cytidine de   | 978.00 CDA      | 2111.00    | 1.42  | 1.16    |
| 50047.00 | A09  | M-011565- alanyl-tRNA   | 16.00 AARS      | 3424.00    | 2.89  | 0.31    |
| 50047.00 | A10  | M-011233- ectonucleo    | 955.00 ENTPD6   | 3054.00    | 2.36  | 0.22    |
| 50047.00 | A11  | M-009699- ATP-bindin    | 20.00 ABCA2     | 1160.00    | 2.50  | 0.08    |
| 50047.00 | A12  | M-010736- ectonucleo    | 954.00 ENTPD2   | 1425.00    | 2.60  | 0.02    |
| 50047.00 | A13  | M-008795- ATP-bindin    | 21.00 ABCA3     | 1474.00    | 6.31  | 3.73    |
| 50047.00 | A14  | M-004226- sialic acid b | 946.00 SIGLEC6  | 1512.00    | 2.58  | 0.00    |
| 50047.00 | A15  | M-008263- ATP-bindin    | 23.00 ABCF1     | 3341.00    | 4.37  | 1.79    |
| 50047.00 | A16  | M-017542- membrane      | 932.00 MS4A3    | 3025.00    | 4.83  | 2.25    |
| 50047.00 | A17  | M-006105- amiloride-s   | 40.00 ACCN1     | 684.00     | 2.19  | 0.39    |
| 50047.00 | A18  | M-014647- CD1e mole     | 913.00 CD1E     | 2642.00    | 2.01  | 0.57    |
| 50047.00 | A19  | M-006106- amiloride-s   | 41.00 ACCN2     | 2773.00    | 2.52  | 0.06    |
| 50047.00 | A20  | M-008878- cysteine co   | 883.00 CCBL1    | 2591.00    | 1.58  | 1.00    |
| 50047.00 | A21  | M-004915- ATP citrate   | 47.00 ACLY      | 3612.00    | 5.51  | 2.93    |
| 50047.00 | A23  | M-010037- aconitase 1   | 48.00 ACO1      | 1653.00    | 2.00  | 0.58    |
| 50047.00 | B02  | M-017045- eukaryotic    | 1968.00 EIF2S3  | 813.00     | 1.85  | 0.74    |
| 50047.00 | B04  | M-015389- eukaryotic    | 1965.00 EIF2S1  | 785.00     | 1.91  | 0.67    |
| 50047.00 | B05  | M-004567- carcinoeml    | 1048.00 CEACAM5 | 3238.00    | 1.33  | 1.25    |
| 50047.00 | B06  | M-011262- eukaryotic    | 1964.00 EIF1AX  | 959.00     | 0.94  | 1.64    |
| 50047.00 | B07  | M-010453- CCAAT/enf     | 1052.00 CEBPD   | 2805.00    | 2.85  | 0.27    |
| 50047.00 | B08  | M-026241- multiple EC   | 1955.00 MEGF9   | 3670.00    | 2.04  | 0.54    |
| 50047.00 | B09  | M-010938- carboxyl es   | 1057.00 CELP    | 3467.00    | 4.36  | 1.78    |
| 50047.00 | B10  | M-010204- multiple EC   | 1954.00 MEGF8   | 3094.00    | 2.88  | 0.30    |
| 50047.00 | B11  | M-011822- centr in, EF- | 1069.00 CETN2   | 2639.00    | 2.58  | 0.00    |
| 50047.00 | B12  | M-021856- multiple EC   | 1953.00 MEGF6   | 1062.00    | 0.75  | 1.83    |
| 50047.00 | B13  | M-019078- cofilin 2 (m  | 1073.00 CFL2    | 2003.00    | 0.75  | 1.83    |
| 50047.00 | B14  | M-003680- ligatin       | 1939.00 LGTN    | 3223.00    | 2.61  | 0.03    |
| 50047.00 | B15  | M-019510- carcinoeml    | 1084.00 CEACAM3 | 3717.00    | 5.95  | 3.37    |
| 50047.00 | B16  | M-017546- eukaryotic    | 1937.00 EEF1G   | 3537.00    | 1.39  | 1.19    |
| 50047.00 | B17  | M-017056- carcinoeml    | 1088.00 CEACAM8 | 3778.00    | 2.14  | 0.44    |
| 50047.00 | B18  | M-011648- eukaryotic    | 1936.00 EEF1D   | 2314.00    | 1.94  | 0.64    |
| 50047.00 | B19  | M-019512- carcinoeml    | 1089.00 CEACAM4 | 2317.00    | 2.37  | 0.21    |
| 50047.00 | B20  | M-011848- early B-cell  | 1879.00 EBF1    | 2963.00    | 1.79  | 0.79    |
| 50047.00 | B21  | M-011239- chondroad     | 1101.00 CHAD    | 2986.00    | 0.67  | 1.91    |
| 50047.00 | B23  | M-012568- chitinase 3-  | 1116.00 CHI3L1  | 2161.00    | 0.97  | 1.61    |
| 50047.00 | C02  | M-012161- calicin       | 881.00 CCIN     | 3459.00    | 6.45  | 3.87    |
| 50047.00 | C04  | M-003004- Cas-Br-M (r   | 868.00 CBLB     | 3732.00    | 3.67  | 1.09    |
| 50047.00 | C05  | M-009566- aconitase 2   | 50.00 ACO2      | 3521.00    | 1.68  | 0.90    |
| 50047.00 | C06  | M-010335- cysteinyl-tf  | 833.00 CARS     | 2701.00    | 4.26  | 1.68    |
| 50047.00 | C07  | M-011566- acrosomal     | 56.00 ACRV1     | 2218.00    | 1.53  | 1.05    |
| 50047.00 | C08  | M-009423- calpain 6     | 827.00 CAPN6    | 4544.00    | 12.63 | 10.05   |

|              |                        |                 |         |      |      |
|--------------|------------------------|-----------------|---------|------|------|
| 50047.00 C09 | M-004502- ADAM met     | 101.00 ADAM8    | 4676.00 | 3.46 | 0.88 |
| 50047.00 C10 | M-011601- calcium mc   | 819.00 CAMLG    | 4907.00 | 3.93 | 1.35 |
| 50047.00 C11 | M-008630- adenosine    | 103.00 ADAR     | 3113.00 | 3.02 | 0.44 |
| 50047.00 C12 | M-006460- calumenin    | 813.00 CALU     | 2883.00 | 4.09 | 1.51 |
| 50047.00 C13 | M-009263- adenosine    | 104.00 ADARB1   | 1105.00 | 1.09 | 1.49 |
| 50047.00 C14 | M-019122- calmodulin   | 810.00 CALML3   | 3357.00 | 6.05 | 3.47 |
| 50047.00 C15 | M-020743- adenosine    | 105.00 ADARB2   | 1996.00 | 1.40 | 1.18 |
| 50047.00 C16 | M-011808- caldesmon    | 800.00 CALD1    | 5415.00 | 6.24 | 3.66 |
| 50047.00 C17 | M-006819- adenylate c  | 107.00 ADCY1    | 2533.00 | 2.45 | 0.13 |
| 50047.00 C18 | M-015409- calcitonin-r | 797.00 CALCB    | 3248.00 | 1.82 | 0.76 |
| 50047.00 C19 | M-006798- adenylate c  | 108.00 ADCY2    | 4018.00 | 4.41 | 1.83 |
| 50047.00 C20 | M-011821- S100 calciu  | 795.00 S100G    | 3307.00 | 1.72 | 0.86 |
| 50047.00 C21 | M-006799- adenylate c  | 109.00 ADCY3    | 3579.00 | 4.78 | 2.20 |
| 50047.00 C23 | M-006638- adenylate c  | 111.00 ADCY5    | 3005.00 | 5.96 | 3.38 |
| 50047.00 D02 | M-011997- epiphygan    | 1833.00 EPYC    | 3534.00 | 0.20 | 2.38 |
| 50047.00 D04 | M-021438- TSC22 dom    | 1831.00 TSC22D3 | 3755.00 | 2.37 | 0.21 |
| 50047.00 D05 | M-010251- chimerin (c  | 1123.00 CHN1    | 3599.00 | 1.39 | 1.19 |
| 50047.00 D06 | M-015993- Down synd    | 1826.00 DSCAM   | 3587.00 | 2.90 | 0.32 |
| 50047.00 D07 | M-003791- chimerin (c  | 1124.00 CHN2    | 4254.00 | 1.43 | 1.15 |
| 50047.00 D08 | M-009821- dihydropyr   | 1809.00 DPYSL3  | 4342.00 | 0.90 | 1.68 |
| 50047.00 D09 | M-020186- tubulin folc | 1155.00 TBCB    | 4668.00 | 4.18 | 1.60 |
| 50047.00 D10 | M-009519- dihydropyr   | 1808.00 DPYSL2  | 2600.00 | 5.96 | 3.38 |
| 50047.00 D11 | M-008170- adaptor-rel  | 1173.00 AP2M1   | 2343.00 | 2.65 | 0.07 |
| 50047.00 D12 | M-011641- dermatopo    | 1805.00 DPT     | 1906.00 | 0.68 | 1.90 |
| 50047.00 D13 | M-011241- adaptor-rel  | 1174.00 AP1S1   | 1647.00 | 0.61 | 1.97 |
| 50047.00 D14 | M-010129- dipeptidyl-  | 1804.00 DPP6    | 3308.00 | 5.17 | 2.59 |
| 50047.00 D15 | M-011833- adaptor-rel  | 1175.00 AP2S1   | 2547.00 | 1.69 | 0.89 |
| 50047.00 D16 | M-011256- DPH2 homi    | 1802.00 DPH2    | 2817.00 | 3.44 | 0.86 |
| 50047.00 D17 | M-012569- adaptor-rel  | 1176.00 AP3S1   | 3230.00 | 6.41 | 3.83 |
| 50047.00 D18 | M-012575- DPH1 homi    | 1801.00 DPH1    | 3998.00 | 1.18 | 1.40 |
| 50047.00 D19 | M-012397- Charcot-Le   | 1178.00 CLC     | 3006.00 | 4.16 | 1.58 |
| 50047.00 D20 | M-011255- dolichyl-ph  | 1798.00 DPAGT1  | 2915.00 | 2.02 | 0.56 |
| 50047.00 D21 | M-003303- chloride ch  | 1179.00 CLCA1   | 4820.00 | 3.86 | 1.28 |
| 50047.00 D23 | M-006151- chloride ch  | 1182.00 CLCN3   | 3467.00 | 1.30 | 1.28 |
| 50047.00 E02 | M-011600- calbindin 2  | 794.00 CALB2    | 3314.00 | 0.78 | 1.80 |
| 50047.00 E04 | M-009471- carbamoyl-   | 790.00 CAD      | 2421.00 | 0.87 | 1.71 |
| 50047.00 E05 | M-006636- adenylate c  | 112.00 ADCY6    | 3619.00 | 2.21 | 0.37 |
| 50047.00 E06 | M-011162- calcium cha  | 786.00 CACNG1   | 3227.00 | 1.58 | 1.00 |
| 50047.00 E07 | M-006801- adenylate c  | 113.00 ADCY7    | 1901.00 | 0.11 | 2.47 |
| 50047.00 E08 | M-008776- calcium cha  | 784.00 CACNB3   | 2843.00 | 0.74 | 1.84 |
| 50047.00 E09 | M-006637- adenylate c  | 114.00 ADCY8    | 2214.00 | 0.45 | 2.13 |
| 50047.00 E10 | M-008741- calcium cha  | 783.00 CACNB2   | 4824.00 | 0.85 | 1.73 |
| 50047.00 E11 | M-006802- adenylate c  | 115.00 ADCY9    | 3066.00 | 0.82 | 1.76 |
| 50047.00 E12 | M-009359- calcium cha  | 782.00 CACNB1   | 1501.00 | 1.20 | 1.38 |
| 50047.00 E13 | M-011198- adenylate c  | 116.00 ADCYAP1  | 2009.00 | 0.70 | 1.88 |
| 50047.00 E14 | M-009336- carbonic ar  | 770.00 CA11     | 2808.00 | 1.14 | 1.44 |
| 50047.00 E15 | M-019204- adipose dif  | 123.00 ADFP     | 2430.00 | 1.15 | 1.43 |



|              |                        |                  |         |      |      |
|--------------|------------------------|------------------|---------|------|------|
| 50047.00 E16 | M-009012- carbonic ar  | 767.00 CA8       | 3677.00 | 1.82 | 0.76 |
| 50047.00 E17 | M-012492- adaptor-rel  | 160.00 AP2A1     | 2034.00 | 1.67 | 0.91 |
| 50047.00 E18 | M-008811- carbonic ar  | 766.00 CA7       | 3224.00 | 1.67 | 0.91 |
| 50047.00 E19 | M-012812- adaptor-rel  | 161.00 AP2A2     | 2092.00 | 2.82 | 0.24 |
| 50047.00 E20 | M-010145- carbonic ar  | 765.00 CA6       | 3283.00 | 3.23 | 0.65 |
| 50047.00 E21 | M-011200- adaptor-rel  | 162.00 AP1B1     | 4791.00 | 2.05 | 0.53 |
| 50047.00 E23 | M-019183- adaptor-rel  | 164.00 AP1G1     | 3076.00 | 2.73 | 0.15 |
| 50047.00 F02 | M-005004- dom-3 hor    | 1797.00 DOM3Z    | 3747.00 | 3.07 | 0.49 |
| 50047.00 F04 | M-004007- dynamin 2    | 1785.00 DNM2     | 2249.00 | 2.05 | 0.53 |
| 50047.00 F05 | M-006152- chloride ch  | 1183.00 CLCN4    | 3924.00 | 2.19 | 0.39 |
| 50047.00 F06 | M-012694- deoxyribon   | 1776.00 DNASE1L3 | 2833.00 | 1.59 | 0.99 |
| 50047.00 F07 | M-006154- chloride ch  | 1185.00 CLCN6    | 3127.00 | 8.35 | 5.77 |
| 50047.00 F08 | M-020181- deoxyribon   | 1775.00 DNASE1L2 | 4506.00 | 6.68 | 4.10 |
| 50047.00 F09 | M-009530- chloride int | 1192.00 CLIC1    | 2260.00 | 2.70 | 0.12 |
| 50047.00 F10 | M-019918- deoxyribon   | 1774.00 DNASE1L1 | 3502.00 | 5.25 | 2.67 |
| 50047.00 F11 | M-012982- chloride int | 1193.00 CLIC2    | 2880.00 | 5.00 | 2.42 |
| 50047.00 F12 | M-009241- dynein, axc  | 1770.00 DNAH9    | 3240.00 | 7.07 | 4.49 |
| 50047.00 F13 | M-012571- chloride ch  | 1207.00 CLNS1A   | 2062.00 | 2.72 | 0.14 |
| 50047.00 F14 | M-010075- dynein, axc  | 1769.00 DNAH8    | 2382.00 | 2.81 | 0.23 |
| 50047.00 F15 | M-008267- colipase, p  | 1208.00 CLPS     | 3581.00 | 7.76 | 5.18 |
| 50047.00 F16 | M-026431- DNA2 DNA     | 1763.00 DNA2L    | 1965.00 | 3.72 | 1.14 |
| 50047.00 F17 | M-004001- clathrin, he | 1213.00 CLTC     | 3270.00 | 4.95 | 2.37 |
| 50047.00 F18 | M-003940- dynamin 1    | 1759.00 DNM1     | 4033.00 | 5.43 | 2.85 |
| 50047.00 F19 | M-005812- chymase 1,   | 1215.00 CMA1     | 4368.00 | 9.02 | 6.44 |
| 50047.00 F20 | M-019798- dentin mat   | 1758.00 DMP1     | 3193.00 | 3.88 | 1.30 |
| 50047.00 F21 | M-031937- cyclic nucle | 1260.00 CNGA2    | 3587.00 | 3.68 | 1.10 |
| 50047.00 F23 | M-010695- cyclic nucle | 1262.00 CNGA4    | 2914.00 | 2.64 | 0.06 |
| 50047.00 G02 | M-008961- carbonic ar  | 763.00 CA5A      | 2053.00 | 0.63 | 1.95 |
| 50047.00 G04 | M-008775- carbonic ar  | 762.00 CA4       | 3062.00 | 2.81 | 0.23 |
| 50047.00 G05 | M-009694- AE binding   | 165.00 AEBP1     | 3851.00 | 2.60 | 0.02 |
| 50047.00 G06 | M-008714- carbonic ar  | 761.00 CA3       | 2352.00 | 0.89 | 1.69 |
| 50047.00 G07 | M-012157- amino-tern   | 166.00 AES       | 3402.00 | 3.79 | 1.21 |
| 50047.00 G08 | M-017688- metallophc   | 758.00 MPPED1    | 2752.00 | 2.11 | 0.47 |
| 50047.00 G09 | M-011201- afamin       | 173.00 AFM       | 2492.00 | 2.17 | 0.41 |
| 50047.00 G10 | M-020106- transmemt    | 757.00 TMEM50B   | 3357.00 | 4.74 | 2.16 |
| 50047.00 G11 | M-011568- alpha-2-HS   | 197.00 AHSG      | 2629.00 | 3.84 | 1.26 |
| 50047.00 G12 | M-019913- chromoson    | 755.00 C21orf2   | 1831.00 | 2.13 | 0.45 |
| 50047.00 G13 | M-024709- absent in r  | 202.00 AIM1      | 1466.00 | 2.66 | 0.08 |
| 50047.00 G14 | M-019789- chromoson    | 753.00 C18orf1   | 1878.00 | 2.66 | 0.08 |
| 50047.00 G15 | M-009276- aminolevul   | 211.00 ALAS1     | 1862.00 | 1.34 | 1.24 |
| 50047.00 G16 | M-019176- formin-like  | 752.00 FMNL1     | 2777.00 | 2.81 | 0.23 |
| 50047.00 G17 | M-008941- ATP-bindin   | 225.00 ABCD2     | 3389.00 | 3.75 | 1.17 |
| 50047.00 G18 | M-020190- chromoson    | 750.00 C16orf3   | 2990.00 | 1.04 | 1.54 |
| 50047.00 G19 | M-004558- arachidona   | 239.00 ALOX12    | 3569.00 | 5.10 | 2.52 |
| 50047.00 G20 | M-012209- diacylglyce  | 747.00 DAGLA     | 3887.00 | 6.05 | 3.47 |
| 50047.00 G21 | M-010166- arachidona   | 241.00 ALOX5AP   | 3822.00 | 3.58 | 1.00 |
| 50047.00 G23 | M-003808- arachidona   | 246.00 ALOX15    | 2849.00 | 1.19 | 1.39 |

|              |                         |                 |         |       |       |
|--------------|-------------------------|-----------------|---------|-------|-------|
| 50047.00 H02 | M-018307- distal-less l | 1745.00 DLX1    | 2915.00 | 3.53  | 0.95  |
| 50047.00 H04 | M-008490- dihydrolipic  | 1737.00 DLAT    | 2418.00 | 1.90  | 0.68  |
| 50047.00 H05 | M-015851- calponin 1,   | 1264.00 CNN1    | 2651.00 | 2.19  | 0.39  |
| 50047.00 H06 | M-011251- deiodinase    | 1735.00 DIO3    | 2498.00 | 1.52  | 1.06  |
| 50047.00 H07 | M-019793- calponin 2    | 1265.00 CNN2    | 3421.00 | 2.48  | 0.10  |
| 50047.00 H08 | M-011171- deiodinase    | 1734.00 DIO2    | 1974.00 | 7.24  | 4.66  |
| 50047.00 H09 | M-011612- calponin 3,   | 1266.00 CNN3    | 2832.00 | 4.41  | 1.83  |
| 50047.00 H10 | M-011170- deiodinase    | 1733.00 DIO1    | 2272.00 | 2.82  | 0.24  |
| 50047.00 H11 | M-018646- 2',3'-cyclic  | 1267.00 CNP     | 1716.00 | 7.58  | 5.00  |
| 50047.00 H12 | M-006670- deoxyhypu     | 1725.00 DHPS    | 2314.00 | 2.16  | 0.42  |
| 50047.00 H13 | M-012906- collagen, ty  | 1305.00 COL13A1 | 2116.00 | 2.74  | 0.16  |
| 50047.00 H14 | M-005848- complemei     | 1675.00 CFD     | 3153.00 | 0.98  | 1.60  |
| 50047.00 H15 | M-011835- coatomer ρ    | 1314.00 COPA    | 64.00   | 12.50 | 9.92  |
| 50047.00 H16 | M-012028- defensin, b   | 1672.00 DEFB1   | 2275.00 | 2.55  | 0.03  |
| 50047.00 H17 | M-017940- coatomer ρ    | 1315.00 COPB1   | 714.00  | 1.54  | 1.04  |
| 50047.00 H18 | M-011637- defensin, a   | 1671.00 DEFA6   | 2788.00 | 2.65  | 0.07  |
| 50047.00 H19 | M-007531- solute carri  | 1317.00 SLC31A1 | 1466.00 | 2.05  | 0.53  |
| 50047.00 H20 | M-013143- defensin, a   | 1670.00 DEFA5   | 2583.00 | 2.01  | 0.57  |
| 50047.00 H21 | M-007532- solute carri  | 1318.00 SLC31A2 | 2613.00 | 1.84  | 0.74  |
| 50047.00 H23 | M-011625- cytochrom     | 1327.00 COX4I1  | 3118.00 | 2.02  | 0.56  |
| 50047.00 I02 | M-012822- chromosom     | 746.00 C11orf10 | 2201.00 | 4.82  | 2.24  |
| 50047.00 I04 | M-009356- metallophc    | 744.00 MPPED2   | 2183.00 | 1.65  | 0.93  |
| 50047.00 I05 | M-031441- ameloblast    | 258.00 AMBN     | 2532.00 | 3.20  | 0.62  |
| 50047.00 I06 | M-008955- zinc finger,  | 741.00 ZNHIT2   | 1788.00 | 1.06  | 1.52  |
| 50047.00 I07 | M-009696- alpha-1-mi    | 259.00 AMBP     | 2381.00 | 1.60  | 0.98  |
| 50047.00 I08 | M-017507- mitochond     | 740.00 MRPL49   | 2777.00 | 2.45  | 0.13  |
| 50047.00 I09 | M-010053- adenosylm     | 262.00 AMD1     | 1129.00 | 2.04  | 0.54  |
| 50047.00 I10 | M-020697- chromosom     | 738.00 C11orf2  | 2323.00 | 2.97  | 0.39  |
| 50047.00 I11 | M-011205- amelogenir    | 266.00 AMELY    | 2924.00 | 4.72  | 2.14  |
| 50047.00 I12 | M-008122- oxidative si  | 734.00 OSGIN2   | 3049.00 | 5.94  | 3.36  |
| 50047.00 I13 | M-009880- adenosine     | 271.00 AMPD2    | 3217.00 | 5.75  | 3.17  |
| 50047.00 I14 | M-008991- complemei     | 733.00 C8G      | 2498.00 | 8.73  | 6.15  |
| 50047.00 I15 | M-011569- amphiphys     | 273.00 AMPH     | 2903.00 | 6.48  | 3.90  |
| 50047.00 I16 | M-005806- calpain 5     | 726.00 CAPN5    | 2108.00 | 3.42  | 0.84  |
| 50047.00 I17 | M-012691- amylase, al   | 276.00 AMY1A    | 3202.00 | 6.37  | 3.79  |
| 50047.00 I18 | M-007818- complemei     | 725.00 C4BPB    | 3502.00 | 6.05  | 3.47  |
| 50047.00 I19 | M-016978- amylase, al   | 279.00 AMY2A    | 3200.00 | 13.31 | 10.73 |
| 50047.00 I20 | M-007817- complemei     | 722.00 C4BPA    | 3958.00 | 6.29  | 3.71  |
| 50047.00 I21 | M-015880- amylase, al   | 280.00 AMY2B    | 2290.00 | 4.06  | 1.48  |
| 50047.00 I23 | M-007487- solute carri  | 293.00 SLC25A6  | 2577.00 | 4.04  | 1.46  |
| 50047.00 J02 | M-011636- defensin, a   | 1669.00 DEFA4   | 3999.00 | 2.98  | 0.40  |
| 50047.00 J04 | M-012027- defensin, a   | 1668.00 DEFA3   | 2186.00 | 0.46  | 2.12  |
| 50047.00 J05 | M-013632- cytochrom     | 1329.00 COX5B   | 3423.00 | 3.83  | 1.25  |
| 50047.00 J06 | M-012999- defensin, a   | 1667.00 DEFA1   | 2016.00 | 2.38  | 0.20  |
| 50047.00 J07 | M-011836- cytochrom     | 1337.00 COX6A1  | 3230.00 | 1.52  | 1.06  |
| 50047.00 J08 | M-011250- DEAH (Asp-    | 1665.00 DHX15   | 1630.00 | 2.27  | 0.31  |
| 50047.00 J09 | M-012021- cytochrom     | 1339.00 COX6A2  | 1811.00 | 0.28  | 2.30  |

|                     |                             |                       |                |              |             |
|---------------------|-----------------------------|-----------------------|----------------|--------------|-------------|
| 50047.00 J10        | M-011842- DEAD (Asp-        | 1662.00 DDX10         | 2635.00        | 1.33         | 1.25        |
| 50047.00 J11        | M-013148- cytochrom         | 1340.00 COX6B1        | 1983.00        | 2.27         | 0.31        |
| <b>50047.00 J12</b> | <b>M-009950- DEAH (Asp-</b> | <b>1660.00 DHX9</b>   | <b>3251.00</b> | <b>7.07</b>  | <b>4.49</b> |
| 50047.00 J13        | M-013151- cytochrom         | 1345.00 COX6C         | 1863.00        | 0.70         | 1.88        |
| 50047.00 J14        | M-012091- Dmx-like 1        | 1657.00 DMXL1         | 2880.00        | 2.05         | 0.53        |
| 50047.00 J15        | M-013152- cytochrom         | 1346.00 COX7A1        | 3044.00        | 4.34         | 1.76        |
| 50047.00 J16        | M-003774- DEAD (Asp-        | 1655.00 DDX5          | 2466.00        | 2.15         | 0.43        |
| 50047.00 J17        | M-011626- cytochrom         | 1347.00 COX7A2        | 1969.00        | 0.96         | 1.62        |
| 50047.00 J18        | M-006874- DEAD (Asp-        | 1654.00 DDX3X         | 1408.00        | 2.34         | 0.24        |
| 50047.00 J19        | M-019464- cytochrom         | 1348.00 COX7AP2       | 1913.00        | 1.57         | 1.01        |
| 50047.00 J20        | M-011993- DEAD (Asp-        | 1653.00 DDX1          | 3837.00        | 3.81         | 1.23        |
| 50047.00 J21        | M-011627- cytochrom         | 1349.00 COX7B         | 3737.00        | 2.89         | 0.31        |
| 50047.00 J23        | M-013317- cytochrom         | 1350.00 COX7C         | 1938.00        | 1.24         | 1.34        |
| 50047.00 K02        | M-011225- compleme          | 708.00 C1QBP          | 2668.00        | 2.02         | 0.56        |
| 50047.00 K04        | M-011818- bystin-like       | 705.00 BYSL           | 1670.00        | 1.38         | 1.20        |
| 50047.00 K05        | M-027301- annexin A2        | 303.00 ANXA2P1        | 2646.00        | 6.31         | <b>3.73</b> |
| 50047.00 K06        | M-011597- betacellulir      | 685.00 BTC            | 1901.00        | 8.52         | <b>5.94</b> |
| 50047.00 K07        | M-010952- annexin A2        | 305.00 ANXA2P3        | 3190.00        | 4.08         | 1.50        |
| 50047.00 K08        | M-011817- bone marr         | 684.00 BST2           | 1684.00        | 8.02         | <b>5.44</b> |
| 50047.00 K09        | M-010381- amine oxid        | 314.00 AOC2           | 1513.00        | 2.45         | 0.13        |
| 50047.00 K10        | M-005101- bone marr         | 683.00 BST1           | 1611.00        | 1.99         | 0.59        |
| 50047.00 K11        | M-017412- amyloid be        | 320.00 APBA1          | 1874.00        | 2.88         | 0.30        |
| 50047.00 K12        | M-013605- zinc finger       | 678.00 ZFP36L2        | 2434.00        | 5.46         | 2.88        |
| 50047.00 K13        | M-017413- amyloid be        | 321.00 APBA2          | 1674.00        | 1.08         | 1.50        |
| <b>50047.00 K14</b> | <b>M-009439- carcinoeml</b> | <b>634.00 CEACAM1</b> | <b>2555.00</b> | <b>10.92</b> | <b>8.34</b> |
| 50047.00 K15        | M-017423- amyloid be        | 323.00 APBB2          | 2090.00        | 2.44         | 0.14        |
| 50047.00 K16        | M-008633- bone gamn         | 632.00 BGLAP          | 2641.00        | 2.12         | 0.46        |
| 50047.00 K17        | M-011577- shroom far        | 357.00 SHROOM2        | 2220.00        | 2.97         | 0.39        |
| 50047.00 K18        | M-011218- beaded fila       | 631.00 BFSP1          | 3369.00        | 4.57         | 1.99        |
| 50047.00 K19        | M-013063- archain 1         | 372.00 ARCN1          | 724.00         | 3.59         | 1.01        |
| 50047.00 K20        | M-012567- alpha-2-gly       | 563.00 AZGP1          | 3484.00        | 6.17         | <b>3.59</b> |
| 50047.00 K21        | M-009454- arginase, ty      | 384.00 ARG2           | 2292.00        | 5.45         | 2.87        |
| 50047.00 K23        | M-019265- ADP-ribosy        | 400.00 ARL1           | 3015.00        | 4.18         | 1.60        |
| 50047.00 L02        | M-012201- D-dopachrc        | 1652.00 DDT           | 3649.00        | 0.36         | 2.22        |
| 50047.00 L04        | M-015786- dolichyl-dip      | 1650.00 DDOST         | 3028.00        | 5.88         | 3.30        |
| 50047.00 L05        | M-011819- cytochrom         | 1351.00 COX8A         | 1795.00        | 1.11         | 1.47        |
| 50047.00 L06        | M-011113- doublecort        | 1641.00 DCX           | 3071.00        | 3.74         | 1.16        |
| 50047.00 L07        | M-005817- carboxypep        | 1359.00 CPA3          | 3362.00        | 2.41         | 0.17        |
| <b>50047.00 L08</b> | <b>M-019622- dCMP dear</b>  | <b>1635.00 DCTD</b>   | <b>4266.00</b> | <b>9.70</b>  | <b>7.12</b> |
| 50047.00 L09        | M-004206- claudin 7         | 1366.00 CLDN7         | 1413.00        | 1.63         | 0.95        |
| 50047.00 L10        | M-011841- drebrin 1         | 1627.00 DBN1          | 1812.00        | 2.43         | 0.15        |
| 50047.00 L11        | M-010266- carnitine pi      | 1375.00 CPT1B         | 2703.00        | 2.15         | 0.43        |
| 50047.00 L12        | M-013465- deleted in l      | 1620.00 DBC1          | 2216.00        | 6.81         | <b>4.23</b> |
| 50047.00 L13        | M-007860- compleme          | 1379.00 CR1L          | 2409.00        | 4.61         | 2.03        |
| 50047.00 L14        | M-011249- deleted in :      | 1618.00 DAZL          | 3454.00        | 4.84         | 2.26        |
| 50047.00 L15        | M-008754- cellular reti     | 1381.00 CRABP1        | 2728.00        | 2.97         | 0.39        |
| 50047.00 L16        | M-009215- cytochrom         | 1595.00 CYP51A1       | 1698.00        | 2.00         | 0.58        |

|              |                         |         |          |         |       |      |
|--------------|-------------------------|---------|----------|---------|-------|------|
| 50047.00 L17 | M-008385- cellular reti | 1382.00 | CRABP2   | 2818.00 | 3.19  | 0.61 |
| 50047.00 L18 | M-009526- cytochrom     | 1592.00 | CYP26A1  | 1457.00 | 1.37  | 1.21 |
| 50047.00 L19 | M-016212- cysteine-ric  | 1396.00 | CRIP1    | 2969.00 | 4.78  | 2.20 |
| 50047.00 L20 | M-009269- cytochrom     | 1591.00 | CYP24A1  | 3542.00 | 3.19  | 0.61 |
| 50047.00 L21 | M-005155- cysteine-ric  | 1397.00 | CRIP2    | 2881.00 | 2.64  | 0.06 |
| 50047.00 L23 | M-009393- collapsin re  | 1400.00 | CRMP1    | 3350.00 | 2.63  | 0.05 |
| 50047.00 M02 | M-012410- ancient ubi   | 550.00  | AUP1     | 3703.00 | 1.11  | 1.47 |
| 50047.00 M04 | M-019495- ATP syntha    | 539.00  | ATP5O    | 3713.00 | 7.41  | 4.83 |
| 50047.00 M05 | M-009332- arylsulfatas  | 416.00  | ARSF     | 3793.00 | 3.85  | 1.27 |
| 50047.00 M06 | M-021378- ATPase, H+    | 537.00  | ATP6AP1  | 2359.00 | 1.65  | 0.93 |
| 50047.00 M07 | M-009074- achaete-sci   | 430.00  | ASCL2    | 2542.00 | 3.93  | 1.35 |
| 50047.00 M08 | M-017618- ATPase, H+    | 535.00  | ATP6VOA1 | 2899.00 | 3.24  | 0.66 |
| 50047.00 M09 | M-009666- arsA arseni   | 439.00  | ASNA1    | 2056.00 | 2.87  | 0.29 |
| 50047.00 M10 | M-012916- ATPase, H+    | 534.00  | ATP6V1G2 | 3047.00 | 3.31  | 0.73 |
| 50047.00 M11 | M-004294- aspartate b   | 444.00  | ASPH     | 2216.00 | 3.29  | 0.71 |
| 50047.00 M12 | M-010907- ATPase, H+    | 533.00  | ATP6V0B  | 1319.00 | 1.21  | 1.37 |
| 50047.00 M13 | M-021881- astrotactin   | 460.00  | ASTN1    | 2672.00 | 2.06  | 0.52 |
| 50047.00 M14 | M-011590- ATPase, H+    | 529.00  | ATP6V1E1 | 1593.00 | 3.52  | 0.94 |
| 50047.00 M15 | M-008915- atonal horr   | 474.00  | ATOH1    | 2338.00 | 6.59  | 4.01 |
| 50047.00 M16 | M-013139- ATPase, H+    | 528.00  | ATP6V1C1 | 1929.00 | 1.92  | 0.66 |
| 50047.00 M17 | M-019059- ATX1 antio    | 475.00  | ATOX1    | 2433.00 | 9.49  | 6.91 |
| 50047.00 M18 | M-017620- ATPase, H+    | 527.00  | ATP6V0C  | 2082.00 | 3.36  | 0.78 |
| 50047.00 M19 | M-006111- ATPase, Na    | 476.00  | ATP1A1   | 3038.00 | 3.13  | 0.55 |
| 50047.00 M20 | M-011589- ATPase, H+    | 526.00  | ATP6V1B2 | 4230.00 | 10.97 | 8.39 |
| 50047.00 M21 | M-004614- ATPase, Na    | 478.00  | ATP1A3   | 3083.00 | 5.03  | 2.45 |
| 50047.00 M23 | M-006110- ATPase, H+    | 479.00  | ATP12A   | 2673.00 | 2.24  | 0.34 |
| 50047.00 N02 | M-027298- ADAM met      | 1587.00 | ADAM3A   | 2457.00 | 1.47  | 1.11 |
| 50047.00 N04 | M-009043- cytochrom     | 1582.00 | CYP8B1   | 1478.00 | 1.89  | 0.69 |
| 50047.00 N05 | M-019373- C-reactive    | 1401.00 | CRP      | 2163.00 | 2.17  | 0.41 |
| 50047.00 N06 | M-008792- cytochrom     | 1581.00 | CYP7A1   | 2743.00 | 1.75  | 0.83 |
| 50047.00 N07 | M-019514- hyaluronar    | 1404.00 | HAPLN1   | 1317.00 | 0.15  | 2.43 |
| 50047.00 N08 | M-008377- cytochrom     | 1580.00 | CYP4B1   | 1137.00 | 1.41  | 1.17 |
| 50047.00 N09 | M-014151- cryptochro    | 1408.00 | CRY2     | 2946.00 | 3.53  | 0.95 |
| 50047.00 N10 | M-009147- cytochrom     | 1579.00 | CYP4A11  | 1559.00 | 1.15  | 1.43 |
| 50047.00 N11 | M-009334- citrate synt  | 1431.00 | CS       | 3309.00 | 3.63  | 1.05 |
| 50047.00 N12 | M-009684- cytochrom     | 1577.00 | CYP3A5   | 1949.00 | 2.46  | 0.12 |
| 50047.00 N13 | M-019516- casein alph   | 1446.00 | CSN1S1   | 2348.00 | 2.17  | 0.41 |
| 50047.00 N14 | M-008169- cytochrom     | 1576.00 | CYP3A4   | 1420.00 | 1.90  | 0.68 |
| 50047.00 N15 | M-019517- casein beta   | 1447.00 | CSN2     | 1945.00 | 1.39  | 1.19 |
| 50047.00 N16 | M-008208- cytochrom     | 1573.00 | CYP2J2   | 3243.00 | 4.93  | 2.35 |
| 50047.00 N17 | M-019940- casein kap    | 1448.00 | CSN3     | 861.00  | 1.74  | 0.84 |
| 50047.00 N18 | M-011169- cytochrom     | 1572.00 | CYP2F1   | 3124.00 | 3.04  | 0.46 |
| 50047.00 N19 | M-019794- neurocan      | 1463.00 | NCAN     | 1477.00 | 3.93  | 1.35 |
| 50047.00 N20 | M-010134- cytochrom     | 1571.00 | CYP2E1   | 3436.00 | 6.96  | 4.38 |
| 50047.00 N21 | M-011632- chondroitir   | 1464.00 | CSPG4    | 2980.00 | 1.85  | 0.73 |
| 50047.00 N23 | M-011244- cysteine an   | 1466.00 | CSRP2    | 3872.00 | 1.42  | 1.16 |
| 50047.00 O02 | M-017590- ATPase, H+    | 523.00  | ATP6V1A  | 1632.00 | 0.49  | 2.09 |

|              |                        |                  |         |       |      |
|--------------|------------------------|------------------|---------|-------|------|
| 50047.00 O04 | M-019688- ATP syntha   | 521.00 ATP5I     | 2965.00 | 1.62  | 0.96 |
| 50047.00 O05 | M-021377- ATPase, Na   | 480.00 ATP1A4    | 3420.00 | 1.02  | 1.56 |
| 50047.00 O06 | M-019494- ATP syntha   | 518.00 ATP5G3    | 2258.00 | 0.31  | 2.27 |
| 50047.00 O07 | M-008381- ATPase, Na   | 481.00 ATP1B1    | 3165.00 | 1.36  | 1.22 |
| 50047.00 O08 | M-019936- ATP syntha   | 517.00 ATP5G2    | 1809.00 | 3.26  | 0.68 |
| 50047.00 O09 | M-010235- ATPase, Na   | 482.00 ATP1B2    | 2361.00 | 1.57  | 1.01 |
| 50047.00 O10 | M-019935- ATP syntha   | 516.00 ATP5G1    | 2491.00 | 0.52  | 2.06 |
| 50047.00 O11 | M-004569- ATPase, Na   | 483.00 ATP1B3    | 1216.00 | 1.15  | 1.43 |
| 50047.00 O12 | M-015956- ATP syntha   | 515.00 ATP5F1    | 1241.00 | 0.16  | 2.42 |
| 50047.00 O13 | M-006115- ATPase, Ca   | 490.00 ATP2B1    | 2241.00 | 2.86  | 0.28 |
| 50047.00 O14 | M-012330- ATP syntha   | 514.00 ATP5E     | 2126.00 | 1.55  | 1.03 |
| 50047.00 O15 | M-006116- ATPase, Ca   | 491.00 ATP2B2    | 2615.00 | 1.76  | 0.82 |
| 50047.00 O16 | M-017852- ATP syntha   | 513.00 ATP5D     | 2902.00 | 1.62  | 0.96 |
| 50047.00 O17 | M-006117- ATPase, Ca   | 492.00 ATP2B3    | 3562.00 | 4.72  | 2.14 |
| 50047.00 O18 | M-018615- ATP syntha   | 506.00 ATP5B     | 1969.00 | 0.91  | 1.67 |
| 50047.00 O19 | M-006118- ATPase, Ca   | 493.00 ATP2B4    | 4345.00 | 2.03  | 0.55 |
| 50047.00 O20 | M-017064- ATP syntha   | 498.00 ATP5A1    | 3525.00 | 4.28  | 1.70 |
| 50047.00 O21 | M-006120- ATPase, H+   | 495.00 ATP4A     | 3763.00 | 2.47  | 0.11 |
| 50047.00 O23 | M-009118- ATPase, H+   | 496.00 ATP4B     | 2869.00 | 1.53  | 1.05 |
| 50047.00 P02 | M-011168- cytochrom    | 1555.00 CYP2B6   | 1950.00 | 0.82  | 1.76 |
| 50047.00 P04 | M-010133- cytochrom    | 1553.00 CYP2A13  | 1343.00 | 4.69  | 2.11 |
| 50047.00 P05 | M-007469- solute carri | 1468.00 SLC25A10 | 1049.00 | 1.14  | 1.44 |
| 50047.00 P06 | M-008634- cytochrom    | 1551.00 CYP3A7   | 1183.00 | 3.13  | 0.55 |
| 50047.00 P07 | M-017398- cystatin SN  | 1469.00 CST1     | 701.00  | 2.14  | 0.44 |
| 50047.00 P08 | M-011248- cylicin, bas | 1539.00 CYLC2    | 1648.00 | 3.58  | 1.00 |
| 50047.00 P09 | M-017395- cystatin SA  | 1470.00 CST2     | 1066.00 | 12.01 | 9.43 |
| 50047.00 P10 | M-024769- cylicin, bas | 1538.00 CYLC1    | 2502.00 | 6.55  | 3.97 |
| 50047.00 P11 | M-011633- cystatin S   | 1472.00 CST4     | 1922.00 | 1.20  | 1.38 |
| 50047.00 P12 | M-017850- cytochrom    | 1534.00 CYB561   | 1184.00 | 2.20  | 0.38 |
| 50047.00 P13 | M-011634- cystatin D   | 1473.00 CST5     | 981.00  | 3.87  | 1.29 |
| 50047.00 P14 | M-020184- testis expre | 1527.00 TEX28    | 1764.00 | 5.27  | 2.69 |
| 50047.00 P15 | M-004999- cystatin E/I | 1474.00 CST6     | 2648.00 | 3.40  | 0.82 |
| 50047.00 P16 | M-005832- chymotryp.   | 1504.00 CTRB1    | 2088.00 | 3.35  | 0.77 |
| 50047.00 P17 | M-011245- cleavage st  | 1477.00 CSTF1    | 2684.00 | 3.43  | 0.85 |
| 50047.00 P18 | M-019796- chitobiase,  | 1486.00 CTBS     | 1689.00 | 3.73  | 1.15 |
| 50047.00 P19 | M-021360- B melanorr   | 574.00 BAGE      | 4165.00 | 3.41  | 0.83 |
| 50047.00 P20 | M-004342- cancer/test  | 1485.00 CTAG1B   | 1497.00 | 7.82  | 5.24 |
| 50047.00 P21 | M-027334- cortistatin  | 1325.00 CORT     | 2263.00 | 6.10  | 3.52 |
| 50047.00 P23 | M-013001- chorionic s  | 1443.00 CSH2     | 3372.00 | 5.28  | 2.70 |
|              |                        | mdn              | 2649.50 | 2.58  | 1.16 |
|              |                        | 3MAD             |         |       | 3.49 |
|              |                        | MADc             |         |       | 1.72 |
| 50047.00 C22 |                        |                  | 5235.00 | 32.88 |      |
| 50047.00 D22 |                        |                  | 4833.00 | 31.35 |      |
| 50047.00 E22 |                        |                  | 3554.00 | 21.08 |      |
| 50047.00 F22 |                        |                  | 3347.00 | 18.23 |      |
|              |                        | mn               | 4242.25 | 25.88 |      |

|              |                                         |           |         |       |
|--------------|-----------------------------------------|-----------|---------|-------|
|              |                                         | sd        | 932.68  | 7.31  |
| 50047.00 G22 |                                         |           | 1222.00 | 0.65  |
| 50047.00 H22 |                                         |           | 1327.00 | 2.41  |
| 50047.00 I22 |                                         |           | 2093.00 | 2.20  |
| 50047.00 J22 |                                         |           | 2191.00 | 2.28  |
|              |                                         | mn        | 1708.25 | 1.89  |
|              |                                         | sd        | 504.27  | 0.83  |
|              |                                         | 3psSD     |         | 21.94 |
|              |                                         | 3ngSD     |         | 2.48  |
|              |                                         | SumSD     |         | 24.42 |
|              |                                         | DiffMn    |         | 23.99 |
|              |                                         | SmovrDiff |         | 1.02  |
|              |                                         | 1minus    |         | -0.02 |
| 50047.00 J03 | D-001206-(siControl non-targeting       |           | 1882.00 | 1.28  |
| 50047.00 I03 | D-001206-(siControl non-targeting       |           | 2301.00 | 1.43  |
| 50047.00 G03 | M-003290-polo-like ki 5347.00 PLK1 SMAR |           | 195.00  | 1.03  |
| 50047.00 H03 | M-003290-polo-like ki 5347.00 PLK1 SMAR |           | 124.00  | 0.81  |
| 50047.00 K03 | D-001600-(siGLO RISC-free siRNA         |           | 5873.00 | 9.50  |
| 50047.00 L03 | D-001600-(siGLO RISC-free siRNA         |           | 5903.00 | 9.32  |

| rZ    | Cell Count | % inf | Abs Dev | rZ    | Cell Count | % inf | Abs Dev | rZ    |
|-------|------------|-------|---------|-------|------------|-------|---------|-------|
| -0.96 | 1354.00    | 1.03  | 0.52    | -0.36 | 1530.00    | 6.99  | 4.33    | 2.06  |
| 1.18  | 1771.00    | 1.07  | 0.48    | -0.34 | 3721.00    | 7.39  | 4.73    | 2.25  |
| -0.81 | 1685.00    | 1.01  | 0.54    | -0.38 | 1444.00    | 5.96  | 3.30    | 1.57  |
| -0.11 | 1964.00    | 1.68  | 0.13    | 0.09  | 2948.00    | 4.44  | 1.78    | 0.85  |
| -0.23 | 682.00     | 1.47  | 0.08    | -0.06 | 998.00     | 2.81  | 0.15    | 0.07  |
| -0.67 | 1239.00    | 1.05  | 0.50    | -0.35 | 1458.00    | 3.64  | 0.98    | 0.46  |
| 0.18  | 1723.00    | 1.80  | 0.25    | 0.17  | 2969.00    | 4.38  | 1.72    | 0.82  |
| -0.13 | 1860.00    | 0.91  | 0.64    | -0.45 | 2118.00    | 4.77  | 2.11    | 1.00  |
| -0.05 | 407.00     | 0.98  | 0.57    | -0.40 | 465.00     | 5.81  | 3.15    | 1.50  |
| 0.01  | 590.00     | 1.19  | 0.36    | -0.26 | 729.00     | 8.37  | 5.71    | 2.72  |
| 2.17  | 710.00     | 6.48  | 4.93    | 3.46  | 665.00     | 10.53 | 7.87    | 3.75  |
| 0.00  | 931.00     | 1.07  | 0.48    | -0.34 | 988.00     | 6.48  | 3.82    | 1.82  |
| 1.04  | 1963.00    | 0.97  | 0.58    | -0.41 | 3099.00    | 2.68  | 0.02    | 0.01  |
| 1.31  | 1745.00    | 0.80  | 0.75    | -0.53 | 2692.00    | 1.86  | 0.80    | -0.38 |
| -0.22 | 523.00     | 1.15  | 0.40    | -0.28 | 477.00     | 8.39  | 5.73    | 2.73  |
| -0.33 | 1458.00    | 1.78  | 0.23    | 0.16  | 2126.00    | 4.52  | 1.86    | 0.88  |
| -0.03 | 846.00     | 1.65  | 0.10    | 0.07  | 1936.00    | 2.01  | 0.65    | -0.31 |
| -0.58 | 2143.00    | 0.93  | 0.62    | -0.44 | 1533.00    | 5.54  | 2.88    | 1.37  |
| 1.70  | 2374.00    | 2.40  | 0.85    | 0.60  | 2961.00    | 5.23  | 2.57    | 1.23  |
| -0.34 | 968.00     | 2.79  | 1.24    | 0.87  | 1140.00    | 5.26  | 2.60    | 1.24  |
| -0.43 | 518.00     | 0.39  | 1.16    | -0.82 | 720.00     | 2.92  | 0.26    | 0.12  |
| -0.39 | 371.00     | 0.27  | 1.28    | -0.90 | 605.00     | 2.98  | 0.32    | 0.15  |
| -0.73 | 2220.00    | 0.63  | 0.92    | -0.65 | 2392.00    | 1.00  | 1.66    | -0.79 |
| -0.95 | 928.00     | 0.32  | 1.23    | -0.86 | 712.00     | 2.53  | 0.13    | -0.06 |
| 0.16  | 1029.00    | 0.19  | 1.36    | -0.95 | 1998.00    | 0.35  | 2.31    | -1.10 |
| -0.31 | 1539.00    | 0.58  | 0.97    | -0.68 | 3811.00    | 1.63  | 1.03    | -0.49 |
| 1.03  | 1650.00    | 0.61  | 0.94    | -0.66 | 3949.00    | 5.01  | 2.35    | 1.12  |
| 0.17  | 2191.00    | 1.41  | 0.14    | -0.10 | 2471.00    | 2.39  | 0.27    | -0.13 |
| 0.00  | 1471.00    | 0.20  | 1.35    | -0.95 | 1569.00    | 1.85  | 0.81    | -0.39 |
| -1.06 | 956.00     | 0.84  | 0.71    | -0.50 | 658.00     | 1.37  | 1.29    | -0.62 |
| -1.06 | 1262.00    | 1.66  | 0.11    | 0.08  | 1217.00    | 1.48  | 1.18    | -0.56 |
| 0.02  | 2256.00    | 1.15  | 0.40    | -0.28 | 2766.00    | 1.99  | 0.67    | -0.32 |
| 1.96  | 2202.00    | 6.58  | 5.03    | 3.53  | 3129.00    | 6.42  | 3.76    | 1.79  |
| -0.69 | 1837.00    | 2.78  | 1.23    | 0.86  | 2737.00    | 1.02  | 1.64    | -0.78 |
| -0.25 | 1761.00    | 2.84  | 1.29    | 0.90  | 2892.00    | 1.14  | 1.52    | -0.72 |
| -0.37 | 988.00     | 0.20  | 1.35    | -0.95 | 1186.00    | 0.84  | 1.82    | -0.87 |
| -0.12 | 1038.00    | 0.19  | 1.36    | -0.95 | 1817.00    | 1.54  | 1.12    | -0.53 |
| -0.46 | 830.00     | 2.65  | 1.10    | 0.77  | 1635.00    | 1.41  | 1.25    | -0.60 |
| -1.11 | 1786.00    | 0.62  | 0.93    | -0.66 | 3333.00    | 0.18  | 2.48    | -1.18 |
| -0.93 | 2364.00    | 0.93  | 0.62    | -0.44 | 1553.00    | 5.02  | 2.36    | 1.12  |
| 2.25  | 2580.00    | 1.94  | 0.39    | 0.27  | 2929.00    | 2.83  | 0.17    | 0.08  |
| 0.64  | 2884.00    | 1.63  | 0.08    | 0.05  | 2700.00    | 3.04  | 0.38    | 0.18  |
| -0.52 | 2754.00    | 1.45  | 0.10    | -0.07 | 2110.00    | 2.27  | 0.39    | -0.18 |
| 0.98  | 1948.00    | 1.28  | 0.27    | -0.19 | 2665.00    | 1.31  | 1.35    | -0.64 |
| -0.61 | 1087.00    | 0.00  | 1.55    | -1.09 | 2685.00    | 1.68  | 0.98    | -0.47 |
| 5.85  | 3055.00    | 2.62  | 1.07    | 0.75  | 4256.00    | 13.56 | 10.90   | 5.19  |



|       |         |      |      |       |         |       |      |       |
|-------|---------|------|------|-------|---------|-------|------|-------|
| 0.52  | 2368.00 | 3.80 | 2.25 | 1.58  | 4127.00 | 3.13  | 0.47 | 0.22  |
| 0.79  | 3503.00 | 3.54 | 1.99 | 1.39  | 5107.00 | 4.17  | 1.51 | 0.72  |
| 0.26  | 1987.00 | 3.57 | 2.02 | 1.42  | 2878.00 | 2.08  | 0.58 | -0.27 |
| 0.88  | 2277.00 | 4.79 | 3.24 | 2.27  | 1974.00 | 5.22  | 2.56 | 1.22  |
| -0.87 | 678.00  | 0.29 | 1.26 | -0.88 | 761.00  | 1.45  | 1.21 | -0.58 |
| 2.02  | 1913.00 | 2.93 | 1.38 | 0.96  | 2952.00 | 4.03  | 1.37 | 0.65  |
| -0.68 | 1045.00 | 1.05 | 0.50 | -0.35 | 2391.00 | 3.97  | 1.31 | 0.62  |
| 2.13  | 2645.00 | 3.78 | 2.23 | 1.56  | 4025.00 | 4.25  | 1.59 | 0.76  |
| -0.08 | 1888.00 | 0.53 | 1.02 | -0.72 | 2385.00 | 1.89  | 0.77 | -0.37 |
| -0.44 | 2475.00 | 0.85 | 0.70 | -0.49 | 2499.00 | 3.24  | 0.58 | 0.28  |
| 1.06  | 1975.00 | 0.35 | 1.20 | -0.84 | 3037.00 | 1.25  | 1.41 | -0.67 |
| -0.50 | 3150.00 | 4.63 | 3.08 | 2.16  | 2704.00 | 4.33  | 1.67 | 0.79  |
| 1.28  | 2359.00 | 1.70 | 0.15 | 0.10  | 2835.00 | 4.41  | 1.75 | 0.83  |
| 1.96  | 2598.00 | 0.38 | 1.17 | -0.82 | 2125.00 | 7.11  | 4.45 | 2.12  |
| -1.38 | 3486.00 | 0.63 | 0.92 | -0.65 | 2634.00 | 1.21  | 1.45 | -0.69 |
| -0.12 | 3767.00 | 4.25 | 2.70 | 1.89  | 3155.00 | 3.39  | 0.73 | 0.35  |
| -0.69 | 2415.00 | 3.06 | 1.51 | 1.06  | 2003.00 | 2.10  | 0.56 | -0.27 |
| 0.19  | 1613.00 | 2.48 | 0.93 | 0.65  | 2615.00 | 1.57  | 1.09 | -0.52 |
| -0.67 | 1953.00 | 2.36 | 0.81 | 0.56  | 3651.00 | 1.37  | 1.29 | -0.62 |
| -0.98 | 3078.00 | 1.04 | 0.51 | -0.36 | 3791.00 | 2.03  | 0.63 | -0.30 |
| 0.93  | 2292.00 | 2.84 | 1.29 | 0.90  | 2834.00 | 3.95  | 1.29 | 0.61  |
| 1.97  | 739.00  | 6.22 | 4.67 | 3.28  | 2109.00 | 8.58  | 5.92 | 2.82  |
| 0.04  | 1713.00 | 3.39 | 1.84 | 1.29  | 2217.00 | 7.44  | 4.78 | 2.28  |
| -1.10 | 1180.00 | 0.85 | 0.70 | -0.50 | 1142.00 | 1.49  | 1.17 | -0.56 |
| -1.15 | 923.00  | 0.22 | 1.33 | -0.94 | 999.00  | 0.90  | 1.76 | -0.84 |
| 1.51  | 1701.00 | 2.35 | 0.80 | 0.56  | 2467.00 | 5.92  | 3.26 | 1.55  |
| -0.52 | 1015.00 | 0.69 | 0.86 | -0.61 | 1756.00 | 2.39  | 0.27 | -0.13 |
| 0.50  | 1258.00 | 6.84 | 5.29 | 3.71  | 2761.00 | 4.96  | 2.30 | 1.10  |
| 2.23  | 1683.00 | 5.23 | 3.68 | 2.58  | 2654.00 | 10.48 | 7.82 | 3.72  |
| -0.82 | 2003.00 | 2.30 | 0.75 | 0.52  | 2634.00 | 3.23  | 0.57 | 0.27  |
| 0.92  | 1124.00 | 3.20 | 1.65 | 1.16  | 1665.00 | 5.35  | 2.69 | 1.28  |
| -0.32 | 1427.00 | 0.98 | 0.57 | -0.40 | 3188.00 | 1.35  | 1.31 | -0.63 |
| 0.74  | 1545.00 | 1.94 | 0.39 | 0.27  | 4012.00 | 5.51  | 2.85 | 1.36  |
| -0.74 | 1408.00 | 1.35 | 0.20 | -0.14 | 2406.00 | 4.90  | 2.24 | 1.07  |
| -1.04 | 2397.00 | 4.21 | 2.66 | 1.87  | 2968.00 | 9.50  | 6.84 | 3.26  |
| -0.99 | 1628.00 | 2.64 | 1.09 | 0.76  | 2327.00 | 3.18  | 0.52 | 0.25  |
| -0.21 | 2118.00 | 1.56 | 0.01 | 0.00  | 2834.00 | 6.25  | 3.59 | 1.71  |
| -0.58 | 1950.00 | 3.59 | 2.04 | 1.43  | 2003.00 | 6.29  | 3.63 | 1.73  |
| -1.44 | 1204.00 | 1.00 | 0.55 | -0.39 | 2021.00 | 1.78  | 0.88 | -0.42 |
| -1.07 | 1858.00 | 2.10 | 0.55 | 0.38  | 3126.00 | 2.21  | 0.45 | -0.22 |
| -1.24 | 1139.00 | 0.70 | 0.85 | -0.60 | 1975.00 | 2.38  | 0.28 | -0.13 |
| -1.00 | 2349.00 | 3.02 | 1.47 | 1.03  | 3940.00 | 4.92  | 2.26 | 1.08  |
| -1.02 | 2339.00 | 2.09 | 0.54 | 0.38  | 2587.00 | 2.32  | 0.34 | -0.16 |
| -0.80 | 1125.00 | 1.51 | 0.04 | -0.03 | 1462.00 | 3.69  | 1.03 | 0.49  |
| -1.09 | 1114.00 | 3.86 | 2.31 | 1.62  | 893.00  | 1.23  | 1.43 | -0.68 |
| -0.84 | 1233.00 | 0.97 | 0.58 | -0.41 | 1535.00 | 2.15  | 0.51 | -0.24 |
| -0.83 | 1647.00 | 3.46 | 1.91 | 1.34  | 2294.00 | 4.80  | 2.14 | 1.02  |



|       |         |      |      |       |         |       |      |       |
|-------|---------|------|------|-------|---------|-------|------|-------|
| -0.44 | 1511.00 | 6.49 | 4.94 | 3.46  | 3335.00 | 2.73  | 0.07 | 0.03  |
| -0.53 | 1612.00 | 5.71 | 4.16 | 2.92  | 1578.00 | 9.82  | 7.16 | 3.41  |
| -0.53 | 1359.00 | 4.49 | 2.94 | 2.06  | 2990.00 | 3.28  | 0.62 | 0.29  |
| 0.14  | 1217.00 | 8.71 | 7.16 | 5.02  | 1296.00 | 5.94  | 3.28 | 1.56  |
| 0.38  | 2702.00 | 3.74 | 2.19 | 1.53  | 4116.00 | 9.09  | 6.43 | 3.06  |
| -0.31 | 2185.00 | 1.92 | 0.37 | 0.26  | 3281.00 | 5.39  | 2.73 | 1.30  |
| 0.09  | 1970.00 | 1.73 | 0.18 | 0.12  | 2116.00 | 4.44  | 1.78 | 0.85  |
| 0.29  | 2556.00 | 1.29 | 0.26 | -0.18 | 3169.00 | 3.09  | 0.43 | 0.21  |
| -0.31 | 1579.00 | 1.14 | 0.41 | -0.29 | 1852.00 | 2.65  | 0.01 | -0.01 |
| -0.22 | 2747.00 | 0.29 | 1.26 | -0.89 | 3273.00 | 2.51  | 0.15 | -0.07 |
| -0.58 | 2135.00 | 0.42 | 1.13 | -0.79 | 2816.00 | 3.02  | 0.36 | 0.17  |
| 3.35  | 2160.00 | 2.64 | 1.09 | 0.76  | 3141.00 | 6.49  | 3.83 | 1.83  |
| 2.38  | 1851.00 | 2.49 | 0.94 | 0.65  | 3903.00 | 5.69  | 3.03 | 1.44  |
| 0.07  | 1683.00 | 1.43 | 0.12 | -0.09 | 1406.00 | 3.56  | 0.90 | 0.43  |
| 1.56  | 2539.00 | 0.71 | 0.84 | -0.59 | 3162.00 | 5.79  | 3.13 | 1.49  |
| 1.41  | 1975.00 | 2.18 | 0.63 | 0.44  | 1859.00 | 5.97  | 3.31 | 1.58  |
| 2.61  | 2319.00 | 1.60 | 0.05 | 0.03  | 2109.00 | 4.84  | 2.18 | 1.04  |
| 0.08  | 1153.00 | 2.60 | 1.05 | 0.74  | 1413.00 | 4.18  | 1.52 | 0.72  |
| 0.14  | 1181.00 | 1.86 | 0.31 | 0.22  | 978.00  | 6.34  | 3.68 | 1.75  |
| 3.01  | 2035.00 | 4.52 | 2.97 | 2.08  | 2069.00 | 9.04  | 6.38 | 3.04  |
| 0.66  | 866.00  | 1.39 | 0.16 | -0.12 | 1120.00 | 2.23  | 0.43 | -0.20 |
| 1.38  | 2713.00 | 3.43 | 1.88 | 1.32  | 2635.00 | 5.31  | 2.65 | 1.26  |
| 1.66  | 2834.00 | 2.40 | 0.85 | 0.59  | 4425.00 | 4.81  | 2.15 | 1.03  |
| 3.75  | 3606.00 | 4.33 | 2.78 | 1.95  | 3901.00 | 11.05 | 8.39 | 3.99  |
| 0.76  | 2322.00 | 0.73 | 0.82 | -0.58 | 2763.00 | 2.57  | 0.09 | -0.04 |
| 0.64  | 3315.00 | 4.59 | 3.04 | 2.13  | 3120.00 | 3.21  | 0.55 | 0.26  |
| 0.04  | 2633.00 | 0.95 | 0.60 | -0.42 | 2298.00 | 5.57  | 2.91 | 1.39  |
| -1.13 | 1935.00 | 0.36 | 1.19 | -0.84 | 1929.00 | 1.61  | 1.05 | -0.50 |
| 0.13  | 2368.00 | 0.63 | 0.92 | -0.65 | 1802.00 | 3.00  | 0.34 | 0.16  |
| 0.01  | 3341.00 | 1.77 | 0.22 | 0.15  | 3667.00 | 5.64  | 2.98 | 1.42  |
| -0.98 | 1268.00 | 0.24 | 1.31 | -0.92 | 1639.00 | 1.71  | 0.95 | -0.45 |
| 0.71  | 2279.00 | 0.22 | 1.33 | -0.94 | 2773.00 | 2.24  | 0.42 | -0.20 |
| -0.27 | 1332.00 | 0.53 | 1.02 | -0.72 | 2335.00 | 2.83  | 0.17 | 0.08  |
| -0.24 | 2436.00 | 0.12 | 1.43 | -1.00 | 2025.00 | 4.35  | 1.69 | 0.80  |
| 1.25  | 1256.00 | 0.96 | 0.59 | -0.42 | 1747.00 | 5.90  | 3.24 | 1.54  |
| 0.73  | 1358.00 | 1.03 | 0.52 | -0.37 | 1480.00 | 8.31  | 5.65 | 2.69  |
| -0.26 | 1191.00 | 0.92 | 0.63 | -0.44 | 1254.00 | 1.83  | 0.83 | -0.39 |
| 0.05  | 851.00  | 0.47 | 1.08 | -0.76 | 1384.00 | 1.73  | 0.93 | -0.44 |
| 0.05  | 934.00  | 3.10 | 1.55 | 1.09  | 1558.00 | 5.91  | 3.25 | 1.54  |
| -0.72 | 822.00  | 2.43 | 0.88 | 0.62  | 965.00  | 2.69  | 0.03 | 0.02  |
| 0.13  | 1466.00 | 1.02 | 0.53 | -0.37 | 1893.00 | 3.91  | 1.25 | 0.59  |
| 0.68  | 1706.00 | 1.82 | 0.27 | 0.19  | 2586.00 | 4.72  | 2.06 | 0.98  |
| -0.90 | 1286.00 | 2.95 | 1.40 | 0.98  | 1748.00 | 1.72  | 0.94 | -0.45 |
| 1.47  | 2502.00 | 3.32 | 1.77 | 1.24  | 3803.00 | 7.57  | 4.91 | 2.34  |
| 2.02  | 3898.00 | 4.44 | 2.89 | 2.03  | 3804.00 | 5.26  | 2.60 | 1.24  |
| 0.59  | 2300.00 | 2.26 | 0.71 | 0.50  | 2675.00 | 2.32  | 0.34 | -0.16 |
| -0.81 | 1918.00 | 1.15 | 0.40 | -0.29 | 2189.00 | 1.83  | 0.83 | -0.40 |

|       |         |      |      |       |         |       |      |       |
|-------|---------|------|------|-------|---------|-------|------|-------|
| 0.56  | 1461.00 | 1.37 | 0.18 | -0.13 | 2000.00 | 3.55  | 0.89 | 0.42  |
| -0.39 | 1672.00 | 1.50 | 0.05 | -0.04 | 1873.00 | 1.66  | 1.00 | -0.48 |
| -0.23 | 1985.00 | 1.11 | 0.44 | -0.31 | 1933.00 | 1.40  | 1.26 | -0.60 |
| -0.61 | 1618.00 | 0.56 | 0.99 | -0.70 | 1748.00 | 0.17  | 2.49 | -1.19 |
| -0.05 | 2142.00 | 0.23 | 1.32 | -0.93 | 2458.00 | 0.81  | 1.85 | -0.88 |
| 2.71  | 1671.00 | 6.52 | 4.97 | 3.49  | 1792.00 | 10.16 | 7.50 | 3.57  |
| 1.07  | 2103.00 | 1.14 | 0.41 | -0.29 | 2139.00 | 7.11  | 4.45 | 2.12  |
| 0.14  | 1247.00 | 0.48 | 1.07 | -0.75 | 1077.00 | 3.34  | 0.68 | 0.32  |
| 2.91  | 1261.00 | 4.76 | 3.21 | 2.25  | 985.00  | 3.45  | 0.79 | 0.38  |
| -0.24 | 1512.00 | 0.20 | 1.35 | -0.95 | 2044.00 | 4.31  | 1.65 | 0.78  |
| 0.09  | 1808.00 | 1.71 | 0.16 | 0.11  | 1429.00 | 2.94  | 0.28 | 0.13  |
| -0.93 | 1656.00 | 0.91 | 0.64 | -0.45 | 1935.00 | 0.93  | 1.73 | -0.82 |
| 5.77  | 67.00   | 5.97 | 4.42 | 3.10  | 43.00   | 9.30  | 6.64 | 3.16  |
| -0.02 | 973.00  | 1.44 | 0.11 | -0.08 | 2564.00 | 3.16  | 0.50 | 0.24  |
| -0.60 | 339.00  | 0.59 | 0.96 | -0.68 | 401.00  | 0.75  | 1.91 | -0.91 |
| 0.04  | 1843.00 | 0.76 | 0.79 | -0.56 | 2252.00 | 1.42  | 1.24 | -0.59 |
| -0.31 | 1279.00 | 0.94 | 0.61 | -0.43 | 1167.00 | 3.00  | 0.34 | 0.16  |
| -0.33 | 1439.00 | 1.60 | 0.05 | 0.03  | 1976.00 | 2.94  | 0.28 | 0.13  |
| -0.43 | 1071.00 | 1.21 | 0.34 | -0.24 | 1412.00 | 2.41  | 0.25 | -0.12 |
| -0.32 | 1915.00 | 1.67 | 0.12 | 0.08  | 3082.00 | 3.73  | 1.07 | 0.51  |
| 1.30  | 1899.00 | 2.37 | 0.82 | 0.57  | 1912.00 | 1.15  | 1.51 | -0.72 |
| -0.54 | 3395.00 | 2.71 | 1.16 | 0.81  | 2332.00 | 0.30  | 2.36 | -1.12 |
| 0.36  | 2228.00 | 1.44 | 0.11 | -0.08 | 2680.00 | 1.01  | 1.65 | -0.79 |
| -0.88 | 1462.00 | 0.41 | 1.14 | -0.80 | 1234.00 | 0.24  | 2.42 | -1.15 |
| -0.57 | 2528.00 | 3.68 | 2.13 | 1.49  | 2321.00 | 0.73  | 1.93 | -0.92 |
| -0.08 | 2410.00 | 3.24 | 1.69 | 1.18  | 1486.00 | 0.74  | 1.92 | -0.92 |
| -0.31 | 1220.00 | 2.13 | 0.58 | 0.41  | 1333.00 | 0.08  | 2.58 | -1.23 |
| 0.23  | 2009.00 | 3.19 | 1.64 | 1.15  | 1546.00 | 0.97  | 1.69 | -0.81 |
| 1.25  | 1752.00 | 1.60 | 0.05 | 0.03  | 1688.00 | 1.48  | 1.18 | -0.56 |
| 1.95  | 2053.00 | 1.41 | 0.14 | -0.10 | 1881.00 | 0.80  | 1.86 | -0.89 |
| 1.84  | 1996.00 | 3.26 | 1.71 | 1.20  | 1170.00 | 1.79  | 0.87 | -0.41 |
| 3.58  | 1676.00 | 2.63 | 1.08 | 0.75  | 1773.00 | 1.52  | 1.14 | -0.54 |
| 2.27  | 2550.00 | 1.65 | 0.10 | 0.07  | 2384.00 | 2.06  | 0.60 | -0.29 |
| 0.49  | 1935.00 | 7.08 | 5.53 | 3.88  | 1415.00 | 1.91  | 0.75 | -0.36 |
| 2.21  | 2388.00 | 3.81 | 2.26 | 1.58  | 2778.00 | 2.34  | 0.32 | -0.15 |
| 2.02  | 2543.00 | 1.85 | 0.30 | 0.21  | 3426.00 | 1.93  | 0.73 | -0.35 |
| 6.24  | 3762.00 | 7.71 | 6.16 | 4.32  | 2758.00 | 4.50  | 1.84 | 0.87  |
| 2.16  | 3270.00 | 5.38 | 3.83 | 2.69  | 2579.00 | 5.00  | 2.34 | 1.11  |
| 0.86  | 3845.00 | 5.15 | 3.60 | 2.52  | 2309.00 | 5.67  | 3.01 | 1.43  |
| 0.85  | 1687.00 | 1.54 | 0.01 | -0.01 | 2007.00 | 3.04  | 0.38 | 0.18  |
| 0.23  | 4065.00 | 7.45 | 5.90 | 4.14  | 2660.00 | 8.31  | 5.65 | 2.69  |
| -1.23 | 1394.00 | 3.44 | 1.89 | 1.33  | 1765.00 | 2.21  | 0.45 | -0.22 |
| 0.73  | 3727.00 | 4.29 | 2.74 | 1.92  | 3397.00 | 5.80  | 3.14 | 1.49  |
| -0.11 | 1942.00 | 6.28 | 4.73 | 3.32  | 1542.00 | 7.72  | 5.06 | 2.41  |
| -0.62 | 2463.00 | 1.50 | 0.05 | -0.04 | 2163.00 | 1.06  | 1.60 | -0.76 |
| -0.18 | 1212.00 | 2.31 | 0.76 | 0.53  | 650.00  | 5.23  | 2.57 | 1.22  |
| -1.34 | 1102.00 | 0.82 | 0.73 | -0.52 | 1567.00 | 5.04  | 2.38 | 1.13  |

|       |         |      |      |       |         |       |      |       |
|-------|---------|------|------|-------|---------|-------|------|-------|
| -0.73 | 2858.00 | 1.71 | 0.16 | 0.11  | 2115.00 | 2.70  | 0.04 | 0.02  |
| -0.18 | 1001.00 | 2.40 | 0.85 | 0.59  | 699.00  | 7.01  | 4.35 | 2.07  |
| 2.61  | 1929.00 | 5.86 | 4.31 | 3.02  | 1639.00 | 8.30  | 5.64 | 2.68  |
| -1.09 | 1314.00 | 3.58 | 2.03 | 1.42  | 1788.00 | 1.62  | 1.04 | -0.50 |
| -0.31 | 1840.00 | 2.77 | 1.22 | 0.86  | 2306.00 | 3.56  | 0.90 | 0.43  |
| 1.02  | 3369.00 | 3.00 | 1.45 | 1.01  | 1817.00 | 1.54  | 1.12 | -0.53 |
| -0.25 | 1666.00 | 3.54 | 1.99 | 1.40  | 870.00  | 1.72  | 0.94 | -0.45 |
| -0.94 | 1812.00 | 5.08 | 3.53 | 2.47  | 1341.00 | 3.13  | 0.47 | 0.22  |
| -0.14 | 880.00  | 0.57 | 0.98 | -0.69 | 529.00  | 6.43  | 3.77 | 1.79  |
| -0.59 | 1044.00 | 0.67 | 0.88 | -0.62 | 828.00  | 5.80  | 3.14 | 1.49  |
| 0.71  | 2244.00 | 5.66 | 4.11 | 2.88  | 2015.00 | 4.47  | 1.81 | 0.86  |
| 0.18  | 3428.00 | 3.62 | 2.07 | 1.45  | 3165.00 | 2.46  | 0.20 | -0.09 |
| -0.78 | 2073.00 | 1.83 | 0.28 | 0.20  | 1743.00 | 2.12  | 0.54 | -0.26 |
| -0.32 | 2530.00 | 0.75 | 0.80 | -0.56 | 2212.00 | 4.07  | 1.41 | 0.67  |
| -0.70 | 1690.00 | 0.30 | 1.25 | -0.88 | 1120.00 | 3.21  | 0.55 | 0.26  |
| 2.17  | 2849.00 | 2.32 | 0.77 | 0.54  | 2131.00 | 5.54  | 2.88 | 1.37  |
| 3.46  | 2547.00 | 2.87 | 1.32 | 0.92  | 747.00  | 10.17 | 7.51 | 3.58  |
| 0.87  | 2388.00 | 1.68 | 0.13 | 0.09  | 2001.00 | 3.45  | 0.79 | 0.37  |
| 3.16  | 2344.00 | 4.14 | 2.59 | 1.81  | 1095.00 | 6.67  | 4.01 | 1.91  |
| -0.08 | 1401.00 | 1.21 | 0.34 | -0.24 | 982.00  | 3.87  | 1.21 | 0.58  |
| -0.34 | 1363.00 | 0.66 | 0.89 | -0.63 | 876.00  | 6.85  | 4.19 | 1.99  |
| 0.18  | 1887.00 | 0.69 | 0.86 | -0.61 | 860.00  | 3.02  | 0.36 | 0.17  |
| 1.68  | 1657.00 | 0.36 | 1.19 | -0.84 | 1419.00 | 2.96  | 0.30 | 0.14  |
| -0.87 | 1532.00 | 1.04 | 0.51 | -0.36 | 487.00  | 7.80  | 5.14 | 2.45  |
| 4.85  | 3282.00 | 7.22 | 5.67 | 3.98  | 1732.00 | 9.18  | 6.52 | 3.10  |
| -0.08 | 2250.00 | 0.36 | 1.19 | -0.84 | 1754.00 | 4.96  | 2.30 | 1.09  |
| -0.27 | 2617.00 | 0.00 | 1.55 | -1.09 | 1797.00 | 2.06  | 0.60 | -0.29 |
| 0.23  | 1903.00 | 1.26 | 0.29 | -0.20 | 2125.00 | 4.33  | 1.67 | 0.79  |
| 1.16  | 3640.00 | 3.46 | 1.91 | 1.34  | 3178.00 | 11.33 | 8.67 | 4.13  |
| 0.59  | 616.00  | 1.62 | 0.07 | 0.05  | 392.00  | 7.14  | 4.48 | 2.13  |
| 2.09  | 2913.00 | 0.51 | 1.04 | -0.73 | 2324.00 | 5.16  | 2.50 | 1.19  |
| 1.67  | 2308.00 | 1.65 | 0.10 | 0.07  | 1202.00 | 8.15  | 5.49 | 2.62  |
| 0.93  | 2225.00 | 2.02 | 0.47 | 0.33  | 2176.00 | 6.53  | 3.87 | 1.84  |
| -1.29 | 2026.00 | 0.44 | 1.11 | -0.78 | 3508.00 | 1.03  | 1.63 | -0.78 |
| 1.92  | 2391.00 | 0.63 | 0.92 | -0.65 | 2138.00 | 5.66  | 3.00 | 1.43  |
| -0.85 | 2285.00 | 0.00 | 1.55 | -1.09 | 1783.00 | 0.56  | 2.10 | -1.00 |
| 0.68  | 3424.00 | 2.31 | 0.76 | 0.53  | 2534.00 | 3.35  | 0.69 | 0.33  |
| -0.10 | 2765.00 | 0.90 | 0.65 | -0.46 | 1572.00 | 2.48  | 0.18 | -0.09 |
| 4.14  | 4714.00 | 5.03 | 3.48 | 2.44  | 4006.00 | 7.14  | 4.48 | 2.13  |
| -0.55 | 2245.00 | 0.22 | 1.33 | -0.93 | 1379.00 | 2.47  | 0.19 | -0.09 |
| -0.09 | 3287.00 | 1.40 | 0.15 | -0.11 | 1398.00 | 2.65  | 0.01 | -0.01 |
| -0.25 | 2602.00 | 1.65 | 0.10 | 0.07  | 1940.00 | 3.45  | 0.79 | 0.38  |
| 2.46  | 1520.00 | 2.57 | 1.02 | 0.71  | 1175.00 | 3.57  | 0.91 | 0.43  |
| 1.18  | 2900.00 | 1.55 | 0.00 | 0.00  | 1162.00 | 2.41  | 0.25 | -0.12 |
| 1.31  | 3327.00 | 2.89 | 1.34 | 0.94  | 2299.00 | 2.65  | 0.01 | 0.00  |
| 0.23  | 2014.00 | 1.79 | 0.24 | 0.16  | 1644.00 | 1.46  | 1.20 | -0.57 |
| -0.33 | 1866.00 | 0.86 | 0.69 | -0.49 | 945.00  | 0.85  | 1.81 | -0.86 |

|       |         |       |       |       |         |      |      |       |
|-------|---------|-------|-------|-------|---------|------|------|-------|
| 0.36  | 3039.00 | 1.35  | 0.20  | -0.14 | 1707.00 | 0.59 | 2.07 | -0.99 |
| -0.70 | 2083.00 | 0.72  | 0.83  | -0.58 | 892.00  | 0.34 | 2.32 | -1.11 |
| 1.28  | 2442.00 | 2.42  | 0.87  | 0.61  | 1827.00 | 1.42 | 1.24 | -0.59 |
| 0.36  | 4077.00 | 2.77  | 1.22  | 0.86  | 3182.00 | 3.46 | 0.80 | 0.38  |
| 0.03  | 3007.00 | 1.33  | 0.22  | -0.16 | 2982.00 | 2.08 | 0.58 | -0.28 |
| 0.03  | 2816.00 | 1.07  | 0.48  | -0.34 | 3074.00 | 1.66 | 1.00 | -0.48 |
| -0.86 | 2781.00 | 0.65  | 0.90  | -0.64 | 2543.00 | 0.31 | 2.35 | -1.12 |
| 2.81  | 2981.00 | 2.21  | 0.66  | 0.46  | 3024.00 | 1.36 | 1.30 | -0.62 |
| 0.74  | 4217.00 | 3.32  | 1.77  | 1.24  | 2376.00 | 0.51 | 2.15 | -1.03 |
| -0.54 | 2549.00 | 0.71  | 0.84  | -0.59 | 2175.00 | 0.41 | 2.25 | -1.07 |
| 0.79  | 3234.00 | 5.10  | 3.55  | 2.49  | 3013.00 | 2.36 | 0.30 | -0.15 |
| 0.39  | 2983.00 | 3.69  | 2.14  | 1.50  | 2047.00 | 0.93 | 1.73 | -0.83 |
| 0.17  | 1395.00 | 1.29  | 0.26  | -0.18 | 805.00  | 0.00 | 2.66 | -1.27 |
| 0.43  | 4584.00 | 6.72  | 5.17  | 3.63  | 1876.00 | 0.43 | 2.23 | -1.06 |
| 0.42  | 1958.00 | 2.60  | 1.05  | 0.74  | 800.00  | 1.38 | 1.29 | -0.61 |
| -0.79 | 2138.00 | 0.98  | 0.57  | -0.40 | 1445.00 | 0.21 | 2.45 | -1.17 |
| -0.30 | 1687.00 | 1.19  | 0.36  | -0.26 | 1668.00 | 0.06 | 2.60 | -1.24 |
| 0.55  | 3136.00 | 3.44  | 1.89  | 1.33  | 2192.00 | 0.96 | 1.70 | -0.81 |
| 2.33  | 4138.00 | 8.19  | 6.64  | 4.66  | 2299.00 | 0.91 | 1.75 | -0.83 |
| -0.38 | 1756.00 | 1.08  | 0.47  | -0.33 | 990.00  | 0.40 | 2.26 | -1.08 |
| 4.02  | 3893.00 | 14.13 | 12.58 | 8.83  | 1144.00 | 1.49 | 1.17 | -0.56 |
| 0.46  | 3512.00 | 2.28  | 0.73  | 0.51  | 1734.00 | 0.06 | 2.60 | -1.24 |
| 0.32  | 3191.00 | 3.70  | 2.15  | 1.51  | 1801.00 | 0.67 | 1.99 | -0.95 |
| 4.88  | 3539.00 | 11.73 | 10.18 | 7.14  | 3624.00 | 5.05 | 2.39 | 1.14  |
| 1.42  | 5771.00 | 11.00 | 9.45  | 6.63  | 4212.00 | 2.47 | 0.19 | -0.09 |
| -0.19 | 1797.00 | 4.62  | 3.07  | 2.15  | 2727.00 | 1.36 | 1.30 | -0.62 |
| -0.65 | 2067.00 | 3.63  | 2.08  | 1.46  | 2320.00 | 1.90 | 0.76 | -0.36 |
| -0.40 | 2181.00 | 1.19  | 0.36  | -0.25 | 1022.00 | 0.59 | 2.07 | -0.99 |
| -0.24 | 4357.00 | 1.63  | 0.08  | 0.05  | 2542.00 | 0.79 | 1.87 | -0.89 |
| -0.48 | 3987.00 | 2.98  | 1.43  | 1.00  | 2771.00 | 2.17 | 0.49 | -0.24 |
| -1.41 | 1231.00 | 1.30  | 0.25  | -0.18 | 1024.00 | 1.07 | 1.59 | -0.76 |
| -0.68 | 2895.00 | 1.55  | 0.00  | 0.00  | 1060.00 | 0.66 | 2.00 | -0.95 |
| 0.55  | 2971.00 | 3.10  | 1.55  | 1.08  | 1861.00 | 1.72 | 0.94 | -0.45 |
| -0.83 | 2945.00 | 3.26  | 1.71  | 1.20  | 1297.00 | 2.78 | 0.12 | 0.05  |
| 0.61  | 4614.00 | 6.52  | 4.97  | 3.49  | 1635.00 | 1.65 | 1.01 | -0.48 |
| -0.07 | 1537.00 | 3.32  | 1.77  | 1.24  | 1023.00 | 5.08 | 2.42 | 1.15  |
| -0.24 | 2612.00 | 4.59  | 3.04  | 2.13  | 1209.00 | 0.83 | 1.83 | -0.87 |
| -0.39 | 2396.00 | 5.09  | 3.54  | 2.48  | 1007.00 | 1.89 | 0.77 | -0.37 |
| -0.69 | 3226.00 | 1.83  | 0.28  | 0.19  | 1410.00 | 2.55 | 0.11 | -0.05 |
| 1.37  | 4097.00 | 4.81  | 3.26  | 2.28  | 3219.00 | 3.91 | 1.25 | 0.60  |
| -0.49 | 1463.00 | 0.48  | 1.07  | -0.75 | 220.00  | 2.73 | 0.07 | 0.03  |
| 0.27  | 4030.00 | 2.28  | 0.73  | 0.51  | 2547.00 | 1.81 | 0.85 | -0.41 |
| 0.78  | 1819.00 | 0.55  | 1.00  | -0.70 | 1726.00 | 1.10 | 1.56 | -0.74 |
| 2.55  | 3237.00 | 4.63  | 3.08  | 2.16  | 3788.00 | 9.45 | 6.79 | 3.23  |
| -0.43 | 2498.00 | 1.40  | 0.15  | -0.11 | 2789.00 | 2.15 | 0.51 | -0.24 |
| -0.67 | 1948.00 | 1.28  | 0.27  | -0.19 | 1812.00 | 3.48 | 0.82 | 0.39  |
| -1.21 | 1700.00 | 0.41  | 1.14  | -0.80 | 1327.00 | 0.68 | 1.98 | -0.94 |

|         |         |      |         |       |         |      |      |       |
|---------|---------|------|---------|-------|---------|------|------|-------|
| -0.56   | 2482.00 | 0.28 | 1.27    | -0.89 | 1354.00 | 1.70 | 0.96 | -0.46 |
| -0.90   | 2879.00 | 1.53 | 0.02    | -0.02 | 2104.00 | 1.33 | 1.33 | -0.63 |
| -1.32   | 3330.00 | 0.45 | 1.10    | -0.77 | 2027.00 | 1.38 | 1.28 | -0.61 |
| -0.71   | 3948.00 | 0.38 | 1.17    | -0.82 | 1803.00 | 3.11 | 0.45 | 0.21  |
| 0.40    | 2084.00 | 3.22 | 1.67    | 1.17  | 1029.00 | 7.77 | 5.11 | 2.44  |
| -0.59   | 1992.00 | 0.45 | 1.10    | -0.77 | 1116.00 | 0.99 | 1.67 | -0.80 |
| -1.20   | 3738.00 | 0.40 | 1.15    | -0.81 | 1282.00 | 1.40 | 1.26 | -0.60 |
| -0.83   | 632.00  | 0.16 | 1.39    | -0.98 | 412.00  | 2.67 | 0.01 | 0.00  |
| -1.41   | 1249.00 | 0.08 | 1.47    | -1.03 | 935.00  | 1.39 | 1.27 | -0.61 |
| 0.16    | 1637.00 | 1.22 | 0.33    | -0.23 | 1153.00 | 1.39 | 1.27 | -0.61 |
| -0.60   | 3245.00 | 0.83 | 0.72    | -0.51 | 1510.00 | 2.12 | 0.54 | -0.26 |
| -0.48   | 3051.00 | 0.07 | 1.48    | -1.04 | 2027.00 | 2.02 | 0.64 | -0.30 |
| -0.56   | 3296.00 | 0.42 | 1.13    | -0.79 | 1682.00 | 1.55 | 1.11 | -0.53 |
| 1.24    | 2835.00 | 1.02 | 0.53    | -0.37 | 1270.00 | 0.87 | 1.79 | -0.86 |
| -0.97   | 1902.00 | 0.89 | 0.66    | -0.46 | 746.00  | 2.41 | 0.25 | -0.12 |
| -0.32   | 3759.00 | 0.56 | 0.99    | -0.70 | 2072.00 | 0.63 | 2.03 | -0.97 |
| 0.99    | 3607.00 | 0.36 | 1.19    | -0.84 | 1732.00 | 0.64 | 2.02 | -0.97 |
| -0.06   | 2515.00 | 0.40 | 1.15    | -0.81 | 2041.00 | 0.69 | 1.97 | -0.94 |
| -0.61   | 2358.00 | 1.19 | 0.36    | -0.26 | 2239.00 | 5.09 | 2.43 | 1.16  |
| -1.02   | 2224.00 | 0.36 | 1.19    | -0.84 | 2147.00 | 1.77 | 0.89 | -0.42 |
| 1.23    | 1791.00 | 0.67 | 0.88    | -0.62 | 1625.00 | 1.54 | 1.12 | -0.53 |
| -0.83   | 950.00  | 0.32 | 1.23    | -0.87 | 761.00  | 1.31 | 1.35 | -0.64 |
| 0.32    | 2612.00 | 0.73 | 0.82    | -0.58 | 1002.00 | 2.89 | 0.23 | 0.11  |
| -0.25   | 1106.00 | 2.08 | 0.53    | 0.37  | 522.00  | 4.60 | 1.94 | 0.92  |
| 0.58    | 2525.00 | 0.32 | 1.23    | -0.87 | 1451.00 | 2.69 | 0.03 | 0.01  |
| 5.48    | 1626.00 | 1.11 | 0.44    | -0.31 | 622.00  | 3.22 | 0.56 | 0.26  |
| 2.31    | 3386.00 | 1.42 | 0.13    | -0.10 | 1553.00 | 1.55 | 1.11 | -0.53 |
| -0.80   | 1829.00 | 0.98 | 0.57    | -0.40 | 1496.00 | 3.48 | 0.82 | 0.39  |
| -0.22   | 1449.00 | 0.28 | 1.27    | -0.90 | 831.00  | 1.93 | 0.73 | -0.35 |
| 0.75    | 1740.00 | 3.45 | 1.90    | 1.33  | 1033.00 | 1.65 | 1.01 | -0.48 |
| 1.57    | 1870.00 | 4.65 | 3.10    | 2.18  | 796.00  | 0.38 | 2.28 | -1.09 |
| 0.48    | 2976.00 | 0.47 | 1.08    | -0.76 | 2244.00 | 1.60 | 1.06 | -0.50 |
| 0.45    | 4045.00 | 0.42 | 1.13    | -0.80 | 1432.00 | 1.40 | 1.26 | -0.60 |
| 0.49    | 3184.00 | 2.42 | 0.87    | 0.61  | 2638.00 | 1.06 | 1.60 | -0.76 |
| 0.67    | 1511.00 | 0.60 | 0.95    | -0.67 | 1066.00 | 0.66 | 2.00 | -0.96 |
| 0.48    | 3185.00 | 2.73 | 1.18    | 0.83  | 2403.00 | 1.04 | 1.62 | -0.77 |
| 3.05    | 1221.00 | 1.23 | 0.32    | -0.23 | 1935.00 | 3.98 | 1.32 | 0.63  |
| 2.05    | 1564.00 | 0.77 | 0.78    | -0.55 | 1733.00 | 1.15 | 1.51 | -0.72 |
| 1.57    | 1014.00 | 0.59 | 0.96    | -0.67 | 1546.00 | 0.45 | 2.21 | -1.05 |
|         | 1975.00 | 1.55 | 0.96    |       | 1938.00 | 2.66 | 1.42 |       |
|         |         |      | 2.89    |       |         |      | 4.26 |       |
|         |         |      | 1.42    |       |         |      | 2.10 |       |
| 4480.00 | 22.55   |      | 4041.00 | 39.50 |         |      |      |       |
| 2045.00 | 22.98   |      | 4240.00 | 30.02 |         |      |      |       |
| 2385.00 | 33.59   |      | 1954.00 | 31.58 |         |      |      |       |
| 3017.00 | 27.64   |      | 4430.00 | 38.40 |         |      |      |       |
| 2981.75 | 26.69   |      | 3666.25 | 34.87 |         |      |      |       |

|         |       |         |       |
|---------|-------|---------|-------|
| 1076.97 | 5.14  | 1152.50 | 4.77  |
| 809.00  | 3.58  | 976.00  | 1.43  |
| 841.00  | 0.59  | 759.00  | 2.90  |
| 2068.00 | 2.71  | 1934.00 | 1.96  |
| 1819.00 | 2.20  | 1798.00 | 4.06  |
| 1384.25 | 2.27  | 1366.75 | 2.59  |
| 653.85  | 1.26  | 585.89  | 1.15  |
|         | 15.43 |         | 14.30 |
|         | 3.77  |         | 3.46  |
|         | 19.20 |         | 17.76 |
|         | 24.42 |         | 32.28 |
|         | 0.79  |         | 0.55  |
|         | 0.21  |         | 0.45  |
| 2116.00 | 2.03  | 1779.00 | 5.56  |
| 2241.00 | 1.56  | 1722.00 | 0.29  |
| 183.00  | 1.09  | 148.00  | 6.76  |
| 169.00  | 4.73  | 115.00  | 8.70  |
| 6599.00 | 5.05  | 5782.00 | 15.62 |
| 5889.00 | 4.09  | 5417.00 | 7.05  |

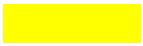

x      toxic a,b,c

y

y

y



x toxic b,c

y

y

y

y

x toxic a,b,c

y

x debris a,b

y

x toxic b,c

y

x      toxic a,b,c

y

y

y

y

y

y

| Plate    | Well | Gene                              | GeneID           | Cell Count | % inf |
|----------|------|-----------------------------------|------------------|------------|-------|
| 50048.00 | A02  | M-032506- hypothetical STGC3      | 474171.00 STGC3  | 2033.00    | 0.15  |
| 50048.00 | A04  | M-008337- haptoglobin-related pr  | 3250.00 HPR      | 1778.00    | 0.45  |
| 50048.00 | A05  | M-020178- eukaryotic translation  | 1973.00 EIF4A1   | 1138.00    | 0.44  |
| 50048.00 | A06  | M-004332- hepsin (transmembran    | 3249.00 HPN      | 2443.00    | 0.29  |
| 50048.00 | A07  | M-013758- eukaryotic translation  | 1974.00 EIF4A2   | 1690.00    | 1.36  |
| 50048.00 | A08  | M-008700- hydroxyprostaglandin    | 3248.00 HPGD     | 2567.00    | 2.10  |
| 50048.00 | A09  | M-019474- eukaryotic translation  | 1981.00 EIF4G1   | 945.00     | 2.22  |
| 50048.00 | A10  | M-012911- homeobox D1             | 3231.00 HOXD1    | 2906.00    | 1.45  |
| 50048.00 | A11  | M-011263- eukaryotic translation  | 1982.00 EIF4G2   | 954.00     | 0.52  |
| 50048.00 | A12  | M-017677- homeobox C12            | 3228.00 HOXC12   | 1097.00    | 0.18  |
| 50048.00 | A13  | M-015739- eukaryotic translation  | 1984.00 EIF5A    | 990.00     | 0.00  |
| 50048.00 | A14  | M-012995- homeobox C8             | 3224.00 HOXC8    | 1263.00    | 1.19  |
| 50048.00 | A15  | M-005860- elastase 1, pancreatic  | 1990.00 ELA1     | 1179.00    | 1.44  |
| 50048.00 | A16  | M-017548- homeobox B9             | 3219.00 HOXB9    | 2718.00    | 0.99  |
| 50048.00 | A17  | M-011851- echinoderm microtubu    | 2009.00 EML1     | 2332.00    | 2.32  |
| 50048.00 | A18  | M-017527- homeobox B8             | 3218.00 HOXB8    | 524.00     | 7.82  |
| 50048.00 | A19  | M-010507- epithelial membrane p   | 2012.00 EMP1     | 2987.00    | 2.34  |
| 50048.00 | A20  | M-012892- homeobox B4             | 3214.00 HOXB4    | 2293.00    | 3.62  |
| 50048.00 | A21  | M-016226- epithelial membrane p   | 2013.00 EMP2     | 2185.00    | 6.41  |
| 50048.00 | A23  | M-010595- epithelial membrane p   | 2014.00 EMP3     | 2040.00    | 1.72  |
| 50048.00 | B02  | M-012831- NADH dehydrogenase      | 4540.00 ND5      | 1752.00    | 0.51  |
| 50048.00 | B04  | M-010326- NADH dehydrogenase      | 4539.00 ND4L     | 2792.00    | 0.64  |
| 50048.00 | B05  | M-012560- hemopexin               | 3263.00 HPX      | 3638.00    | 1.02  |
| 50048.00 | B06  | M-012830- NADH dehydrogenase      | 4538.00 ND4      | 3348.00    | 1.31  |
| 50048.00 | B07  | M-009128- ES cell expressed Ras   | 3266.00 ERAS     | 2256.00    | 0.31  |
| 50048.00 | B08  | M-012829- NADH dehydrogenase      | 4537.00 ND3      | 1204.00    | 1.16  |
| 50048.00 | B09  | M-016363- HIV-1 Rev binding prot  | 3268.00 HRBL     | 1391.00    | 0.07  |
| 50048.00 | B10  | M-012828- NADH dehydrogenase      | 4536.00 ND2      | 2506.00    | 2.00  |
| 50048.00 | B11  | M-017685- DnaJ (Hsp40) homolog    | 3300.00 DNAJB2   | 2118.00    | 1.18  |
| 50048.00 | B12  | M-012827- NADH dehydrogenase      | 4535.00 ND1      | 1183.00    | 6.59  |
| 50048.00 | B13  | M-019617- DnaJ (Hsp40) homolog    | 3301.00 DNAJA1   | 1901.00    | 1.26  |
| 50048.00 | B14  | M-011339- mitochondrial translati | 4528.00 MTIF2    | 2666.00    | 3.38  |
| 50048.00 | B15  | M-019618- immunoglobulin super    | 3321.00 IGSF3    | 3050.00    | 1.34  |
| 50048.00 | B16  | M-012826- cytochrome c oxidase :  | 4513.00 COX2     | 2297.00    | 5.88  |
| 50048.00 | B17  | M-026788- heat shock protein 90k  | 3324.00 HSP90AA2 | 2902.00    | 2.24  |
| 50048.00 | B18  | M-012825- cytochrome c oxidase :  | 4512.00 COX1     | 3573.00    | 5.91  |
| 50048.00 | B19  | M-012735- DnaJ (Hsp40) homolog    | 3337.00 DNAJB1   | 2048.00    | 1.37  |
| 50048.00 | B20  | M-012824- ATP synthase F0 subur   | 4509.00 ATP8     | 1930.00    | 1.55  |
| 50048.00 | B21  | M-020055- DnaJ (Hsp40) homolog    | 3338.00 DNAJC4   | 3964.00    | 1.77  |
| 50048.00 | B23  | M-009376- N-deacetylase/N-sulfo   | 3340.00 NDST1    | 2828.00    | 2.23  |
| 50048.00 | C02  | M-017429- hippocalcin             | 3208.00 HPCA     | 3667.00    | 1.06  |
| 50048.00 | C04  | M-012891- homeobox A6             | 3203.00 HOXA6    | 2712.00    | 2.88  |
| 50048.00 | C05  | M-004426- endonuclease G          | 2021.00 ENDOG    | 2437.00    | 0.62  |
| 50048.00 | C06  | M-017311- homeobox A3             | 3200.00 HOXA3    | 3310.00    | 4.17  |
| 50048.00 | C07  | M-011852- endosulfine alpha       | 2029.00 ENSA     | 2165.00    | 2.12  |
| 50048.00 | C08  | M-013501- heterogeneous nuclea    | 3192.00 HNRPU    | 1563.00    | 1.73  |

|          |     |                                     |         |          |         |      |
|----------|-----|-------------------------------------|---------|----------|---------|------|
| 50048.00 | C09 | M-003709- solute carrier family 29  | 2030.00 | SLC29A1  | 1018.00 | 1.08 |
| 50048.00 | C10 | M-011293- heterogeneous nuclea      | 3191.00 | HNRPL    | 1531.00 | 6.40 |
| 50048.00 | C11 | M-003661- erythrocyte membran       | 2037.00 | EPB41L2  | 1456.00 | 5.98 |
| 50048.00 | C12 | M-012440- heterogeneous nuclea      | 3189.00 | HNRPH3   | 2029.00 | 5.91 |
| 50048.00 | C13 | M-003663- erythrocyte membran       | 2039.00 | EPB49    | 2931.00 | 4.44 |
| 50048.00 | C14 | M-013245- heterogeneous nuclea      | 3188.00 | HNRPH2   | 2748.00 | 7.97 |
| 50048.00 | C15 | M-011269- fibrillarin               | 2091.00 | FBL      | 1688.00 | 1.18 |
| 50048.00 | C16 | M-012107- heterogeneous nuclea      | 3187.00 | HNRPH1   | 1863.00 | 1.13 |
| 50048.00 | C17 | M-010511- ecotropic viral integrat  | 2123.00 | EVI2A    | 2645.00 | 9.11 |
| 50048.00 | C18 | M-013449- heterogeneous nuclea      | 3185.00 | HNRPF    | 1293.00 | 2.09 |
| 50048.00 | C19 | M-003829- fibroblast activation pr  | 2191.00 | FAP      | 1795.00 | 1.45 |
| 50048.00 | C20 | M-011869- heterogeneous nuclea      | 3183.00 | HNRPC    | 1649.00 | 2.55 |
| 50048.00 | C21 | M-011655- fibulin 2                 | 2199.00 | FBLN2    | 3752.00 | 1.44 |
| 50048.00 | C23 | M-009472- ficolin (collagen/fibrinc | 2219.00 | FCN1     | 2619.00 | 4.05 |
| 50048.00 | D02 | M-012823- ATP synthase FO subur     | 4508.00 | ATP6     | 3809.00 | 0.79 |
| 50048.00 | D04 | M-018440- metallothionein 1E        | 4493.00 | MT1E     | 2898.00 | 1.41 |
| 50048.00 | D05 | M-016685- histatin 1                | 3346.00 | HTN1     | 1956.00 | 0.56 |
| 50048.00 | D06 | M-011731- microseminoprotein, b     | 4477.00 | MSMB     | 2733.00 | 1.72 |
| 50048.00 | D07 | M-009272- isoleucyl-tRNA synthet    | 3376.00 | IARS     | 1328.00 | 1.05 |
| 50048.00 | D08 | M-011338- musashi homolog 1 (D      | 4440.00 | MSI1     | 2615.00 | 0.61 |
| 50048.00 | D09 | M-011998- islet cell autoantigen 1  | 3382.00 | ICA1     | 1964.00 | 3.92 |
| 50048.00 | D10 | M-017720- MpV17 mitochondrial       | 4358.00 | MPV17    | 1767.00 | 1.87 |
| 50048.00 | D11 | M-011296- intercellular adhesion i  | 3386.00 | ICAM4    | 3076.00 | 1.95 |
| 50048.00 | D12 | M-014162- Mov10, Moloney leuke      | 4343.00 | MOV10    | 2866.00 | 2.09 |
| 50048.00 | D13 | M-008294- isocitrate dehydrogena    | 3417.00 | IDH1     | 3226.00 | 7.35 |
| 50048.00 | D14 | M-012642- myelin oligodendrocyt     | 4340.00 | MOG      | 3216.00 | 3.11 |
| 50048.00 | D15 | M-004013- isocitrate dehydrogena    | 3418.00 | IDH2     | 1855.00 | 0.92 |
| 50048.00 | D16 | M-019476- myelin-associated olig    | 4336.00 | MOBP     | 2919.00 | 4.59 |
| 50048.00 | D17 | M-008753- isocitrate dehydrogena    | 3419.00 | IDH3A    | 2578.00 | 5.47 |
| 50048.00 | D18 | M-019813- myeloid/lymphoid or r     | 4300.00 | MLLT3    | 3586.00 | 5.05 |
| 50048.00 | D19 | M-009596- isocitrate dehydrogena    | 3420.00 | IDH3B    | 2783.00 | 4.99 |
| 50048.00 | D20 | M-020074- AF4/FMR2 family, mer      | 4299.00 | AFF1     | 3492.00 | 6.44 |
| 50048.00 | D21 | M-009361- isocitrate dehydrogena    | 3421.00 | IDH3G    | 2026.00 | 4.15 |
| 50048.00 | D23 | M-018788- immunoglobulin J poly     | 3512.00 | IGJ      | 2463.00 | 4.55 |
| 50048.00 | E02 | M-013483- heterogeneous nuclea      | 3182.00 | HNRPAB   | 3863.00 | 0.34 |
| 50048.00 | E04 | M-011690- heterogeneous nuclea      | 3181.00 | HNRPA2B1 | 1709.00 | 1.29 |
| 50048.00 | E05 | M-011271- glypican 4                | 2239.00 | GPC4     | 3456.00 | 1.74 |
| 50048.00 | E06 | M-007506- solute carrier family 29  | 3177.00 | SLC29A2  | 2063.00 | 0.15 |
| 50048.00 | E07 | M-011861- glypican 5                | 2262.00 | GPC5     | 1818.00 | 0.99 |
| 50048.00 | E08 | M-019619- major histocompatibili    | 3140.00 | MR1      | 824.00  | 0.61 |
| 50048.00 | E09 | M-007904- fibrinogen-like 1         | 2267.00 | FGL1     | 2211.00 | 0.32 |
| 50048.00 | E10 | M-013397- major histocompatibili    | 3134.00 | HLA-F    | 2037.00 | 0.20 |
| 50048.00 | E11 | M-015857- four and a half LIM dor   | 2273.00 | FHL1     | 1402.00 | 0.29 |
| 50048.00 | E12 | M-010514- hepatic leukemia facto    | 3131.00 | HLF      | 789.00  | 0.25 |
| 50048.00 | E13 | M-015862- four and a half LIM dor   | 2274.00 | FHL2     | 1422.00 | 0.28 |
| 50048.00 | E14 | M-013226- major histocompatibili    | 3127.00 | HLA-DRB5 | 1582.00 | 0.51 |
| 50048.00 | E15 | M-019805- four and a half LIM dor   | 2275.00 | FHL3     | 2535.00 | 1.07 |

|          |            |                                            |                |                |                |             |
|----------|------------|--------------------------------------------|----------------|----------------|----------------|-------------|
| 50048.00 | E16        | M-013225- major histocompatibili           | 3126.00        | HLA-DRB4       | 1930.00        | 0.21        |
| 50048.00 | E17        | M-009944- FK506 binding protein            | 2281.00        | FKBP1B         | 1857.00        | 0.32        |
| 50048.00 | E18        | M-018944- major histocompatibili           | 3120.00        | HLA-DQB2       | 1611.00        | 0.12        |
| 50048.00 | E19        | M-017506- flightless I homolog (D          | 2314.00        | FLII           | 2105.00        | 0.19        |
| 50048.00 | E20        | M-013829- major histocompatibili           | 3118.00        | HLA-DQA2       | 2518.00        | 0.12        |
| 50048.00 | E21        | M-012715- melan-A                          | 2315.00        | MLANA          | 3516.00        | 0.09        |
| 50048.00 | E23        | M-003666- flotillin 2                      | 2319.00        | FLOT2          | 3055.00        | 0.33        |
| 50048.00 | F02        | M-019104- muskelin 1, intracellula         | 4289.00        | MKLN1          | 2490.00        | 0.84        |
| 50048.00 | F04        | M-008382- microsomal glutathion            | 4259.00        | MGST3          | 1758.00        | 4.15        |
| 50048.00 | F05        | M-019613- immunoglobulin super             | 3547.00        | IGSF1          | 3031.00        | 0.53        |
| 50048.00 | <b>F06</b> | <b>M-008856- O-6-methylguanine-DN</b>      | <b>4255.00</b> | <b>MGMT</b>    | <b>2988.00</b> | <b>8.33</b> |
| 50048.00 | F07        | M-006823- inner centromere prot            | 3619.00        | INCENP         | 552.00         | 1.81        |
| 50048.00 | F08        | M-020072- CTAGE family, membe              | 4253.00        | CTAGE5         | 1657.00        | 0.91        |
| 50048.00 | F09        | M-010337- indoleamine-pyrrole 2,           | 3620.00        | INDO           | 2133.00        | 2.77        |
| 50048.00 | F10        | M-011334- mannosyl (alpha-1,6-)            | 4249.00        | MGAT5          | 1761.00        | 2.27        |
| 50048.00 | F11        | M-012170- intracisternal A particl         | 3652.00        | IPP            | 1708.00        | 1.23        |
| 50048.00 | F12        | M-010268- mannosyl (beta-1,4-)-g           | 4248.00        | MGAT3          | 1779.00        | 1.57        |
| 50048.00 | F13        | M-022281- iron-responsive eleme            | 3658.00        | IREB2          | 1776.00        | 0.68        |
| 50048.00 | F14        | M-011333- mannosyl (alpha-1,6-)            | 4247.00        | MGAT2          | 3397.00        | 1.68        |
| 50048.00 | F15        | M-017742- immunoglobulin super             | 3671.00        | ISLR           | 2973.00        | 0.61        |
| 50048.00 | <b>F16</b> | <b>M-019606- secretoglobin, family 2</b>   | <b>4246.00</b> | <b>SCGB2A1</b> | <b>2994.00</b> | <b>3.51</b> |
| 50048.00 | F17        | M-008516- integrin, alpha 1                | 3672.00        | ITGA1          | 1565.00        | 0.38        |
| 50048.00 | F18        | M-011332- mannosyl (alpha-1,3-)            | 4245.00        | MGAT1          | 3310.00        | 1.81        |
| 50048.00 | F19        | M-010096- integrin beta 4 binding          | 3692.00        | ITGB4BP        | 1990.00        | 0.20        |
| 50048.00 | F20        | M-012177- antigen p97 (melanom             | 4241.00        | MFI2           | 3567.00        | 1.68        |
| 50048.00 | <b>F21</b> | <b>M-019612- inter-alpha (globulin) ii</b> | <b>3697.00</b> | <b>ITIH1</b>   | <b>3361.00</b> | <b>7.23</b> |
| 50048.00 | F23        | M-019610- inter-alpha (globulin) ii        | 3698.00        | ITIH2          | 3492.00        | 2.12        |
| 50048.00 | G02        | M-010949- major histocompatibili           | 3116.00        | HLA-DPB2       | 3593.00        | 0.81        |
| 50048.00 | G04        | M-013548- major histocompatibili           | 3113.00        | HLA-DPA1       | 3074.00        | 0.75        |
| 50048.00 | G05        | M-008135- flavin containing monc           | 2327.00        | FMO2           | 2527.00        | 2.10        |
| 50048.00 | G06        | M-007922- complement factor H-i            | 3080.00        | CFHR2          | 2753.00        | 4.94        |
| 50048.00 | G07        | M-016472- folylpolyglutamate syn           | 2356.00        | FPGS           | 1879.00        | 1.33        |
| 50048.00 | G08        | M-007921- complement factor H-i            | 3078.00        | CFHR1          | 1361.00        | 3.01        |
| 50048.00 | G09        | M-011864- FSHD region gene 1               | 2483.00        | FRG1           | 1237.00        | 1.21        |
| 50048.00 | G10        | M-019219- NCK-associated proteir           | 3071.00        | NCKAP1L        | 1363.00        | 4.04        |
| 50048.00 | G11        | M-005268- centromere protein I             | 2491.00        | CENPI          | 1269.00        | 1.42        |
| 50048.00 | G12        | M-017444- helicase, lymphoid-spe           | 3070.00        | HELLS          | 2598.00        | 5.50        |
| 50048.00 | G13        | M-019635- fucosyltransferase 4 (a          | 2526.00        | FUT4           | 1888.00        | 2.33        |
| 50048.00 | G14        | M-008325- histidine decarboxylas           | 3067.00        | HDC            | 2259.00        | 3.10        |
| 50048.00 | G15        | M-019636- fucosyltransferase 5 (a          | 2527.00        | FUT5           | 3292.00        | 3.49        |
| 50048.00 | G16        | M-017739- hematopoietic cell-spe           | 3059.00        | HCLS1          | 945.00         | 1.06        |
| 50048.00 | G17        | M-019806- fucosyltransferase 7 (a          | 2529.00        | FUT7           | 1203.00        | 2.58        |
| 50048.00 | G18        | M-009226- holocytochrome c synt            | 3052.00        | HCCS           | 2437.00        | 2.83        |
| 50048.00 | G19        | M-007557- solute carrier family 37         | 2542.00        | SLC37A4        | 1372.00        | 3.06        |
| 50048.00 | <b>G20</b> | <b>M-017200- hyaluronan synthase 3</b>     | <b>3038.00</b> | <b>HAS3</b>    | <b>3184.00</b> | <b>8.64</b> |
| 50048.00 | G21        | M-011273- G antigen 1                      | 2543.00        | GAGE1          | 3242.00        | 1.70        |
| 50048.00 | G23        | M-011274- G antigen 2                      | 2574.00        | GAGE2          | 3441.00        | 2.76        |

|          |     |                                    |         |           |         |       |
|----------|-----|------------------------------------|---------|-----------|---------|-------|
| 50048.00 | H02 | M-008026- microfibrillar-associate | 4239.00 | MFAP4     | 2499.00 | 0.24  |
| 50048.00 | H04 | M-017085- microfibrillar-associate | 4238.00 | MFAP3     | 1848.00 | 2.44  |
| 50048.00 | H05 | M-012584- inter-alpha (globulin) i | 3699.00 | ITIH3     | 3165.00 | 1.99  |
| 50048.00 | H06 | M-011727- microfibrillar-associate | 4237.00 | MFAP2     | 1851.00 | 0.43  |
| 50048.00 | H07 | M-017838- inter-alpha (globulin) i | 3700.00 | ITIH4     | 2166.00 | 4.71  |
| 50048.00 | H08 | M-020071- microfibrillar-associate | 4236.00 | MFAP1     | 799.00  | 3.38  |
| 50048.00 | H09 | M-017073- STT3, subunit of the ol  | 3703.00 | STT3A     | 3625.00 | 3.53  |
| 50048.00 | H10 | M-009294- methyltransferase like   | 4234.00 | METTLL1   | 2993.00 | 2.27  |
| 50048.00 | H11 | M-006208- inositol 1,4,5-triphosph | 3709.00 | ITPR2     | 2507.00 | 3.19  |
| 50048.00 | H12 | M-020344- male-enhanced antigen    | 4201.00 | MEA1      | 2095.00 | 0.72  |
| 50048.00 | H13 | M-010945- involucrin               | 3713.00 | IVL       | 1631.00 | 1.04  |
| 50048.00 | H14 | M-009461- malic enzyme 2, NAD(+)   | 4200.00 | ME2       | 2567.00 | 5.41  |
| 50048.00 | H15 | M-012114- lysyl-tRNA synthetase    | 3735.00 | KARS      | 2549.00 | 1.37  |
| 50048.00 | H16 | M-008439- malate dehydrogenase     | 4191.00 | MDH2      | 2815.00 | 7.21  |
| 50048.00 | H17 | M-006240- potassium inwardly-re    | 3766.00 | KCNJ10    | 4081.00 | 2.25  |
| 50048.00 | H18 | M-009264- malate dehydrogenase     | 4190.00 | MDH1      | 2920.00 | 2.53  |
| 50048.00 | H19 | M-006242- potassium inwardly-re    | 3768.00 | KCNJ12    | 3454.00 | 1.88  |
| 50048.00 | H20 | M-012815- DnaJ (Hsp40) homolog     | 4189.00 | DNAJB9    | 2660.00 | 4.02  |
| 50048.00 | H21 | M-006243- potassium inwardly-re    | 3769.00 | KCNJ13    | 3407.00 | 2.32  |
| 50048.00 | H23 | M-006244- potassium inwardly-re    | 3770.00 | KCNJ14    | 3068.00 | 2.64  |
| 50048.00 | I02 | M-012053- hyaluronan synthase 2    | 3037.00 | HAS2      | 2256.00 | 3.32  |
| 50048.00 | I04 | M-009664- hyaluronan synthase 1    | 3036.00 | HAS1      | 1185.00 | 6.33  |
| 50048.00 | I05 | M-011275- G antigen 4              | 2576.00 | GAGE4     | 1985.00 | 4.89  |
| 50048.00 | I06 | M-013412- histidyl-tRNA syntheta   | 3035.00 | HARS      | 1557.00 | 5.01  |
| 50048.00 | I07 | M-011276- G antigen 5              | 2577.00 | GAGE5     | 1756.00 | 5.92  |
| 50048.00 | I08 | M-009390- hydroxysteroid (17-bet   | 3028.00 | HSD17B10  | 1819.00 | 11.16 |
| 50048.00 | I09 | M-011277- G antigen 6              | 2578.00 | GAGE6     | 1481.00 | 5.67  |
| 50048.00 | I10 | M-005893- hyaluronan binding pro   | 3026.00 | HABP2     | 1556.00 | 3.92  |
| 50048.00 | I11 | M-014153- G antigen 7              | 2579.00 | GAGE7     | 2194.00 | 3.83  |
| 50048.00 | I12 | M-012045- histone cluster 1, H1a   | 3024.00 | HIST1H1A  | 907.00  | 5.40  |
| 50048.00 | I13 | M-011280- UDP-N-acetyl-alpha-D-    | 2589.00 | GALNT1    | 985.00  | 5.28  |
| 50048.00 | I14 | M-011684- H3 histone, family 3A    | 3020.00 | H3F3A     | 2242.00 | 2.99  |
| 50048.00 | I15 | M-011865- UDP-N-acetyl-alpha-D-    | 2590.00 | GALNT2    | 2592.00 | 4.90  |
| 50048.00 | I16 | M-013138- histone cluster 1, H2bc  | 3018.00 | HIST1H2BB | 2230.00 | 4.98  |
| 50048.00 | I17 | M-011866- UDP-N-acetyl-alpha-D-    | 2591.00 | GALNT3    | 1653.00 | 6.17  |
| 50048.00 | I18 | M-013137- histone cluster 1, H2bc  | 3017.00 | HIST1H2BC | 3692.00 | 7.50  |
| 50048.00 | I19 | M-027288- glucosidase, alpha; neu  | 2595.00 | GANC      | 1716.00 | 1.17  |
| 50048.00 | I20 | M-013147- histone cluster 1, H2ac  | 3013.00 | HIST1H2AC | 3831.00 | 3.65  |
| 50048.00 | I21 | M-012100- leucine rich repeat cor  | 2615.00 | LRRC32    | 2196.00 | 9.70  |
| 50048.00 | I23 | M-009069- growth arrest-specific   | 2621.00 | GAS6      | 3066.00 | 2.32  |
| 50048.00 | J02 | M-012127- MyoD family inhibitor    | 4188.00 | MDFI      | 3321.00 | 5.45  |
| 50048.00 | J04 | M-017503- sperm mitochondria-a     | 4184.00 | SMCP      | 1361.00 | 5.88  |
| 50048.00 | J05 | M-006245- potassium inwardly-re    | 3772.00 | KCNJ15    | 3497.00 | 13.76 |
| 50048.00 | J06 | M-014136- muscleblind-like (Dros   | 4154.00 | MBNL1     | 2913.00 | 2.68  |
| 50048.00 | J07 | M-006246- potassium inwardly-re    | 3773.00 | KCNJ16    | 2188.00 | 2.06  |
| 50048.00 | J08 | M-012057- myoglobin                | 4151.00 | MB        | 3612.00 | 3.85  |



|          |     |                                       |         |           |         |      |
|----------|-----|---------------------------------------|---------|-----------|---------|------|
| 50048.00 | J09 | M-006254- potassium channel, sul      | 3775.00 | KCNK1     | 2209.00 | 4.30 |
| 50048.00 | J10 | M-011329- matrilin 2                  | 4147.00 | MATN2     | 1248.00 | 6.01 |
| 50048.00 | J11 | M-006261- potassium channel, sul      | 3776.00 | KCNK2     | 2399.00 | 9.09 |
| 50048.00 | J12 | M-008818- methionine adenosyltr       | 4144.00 | MAT2A     | 1266.00 | 3.87 |
| 50048.00 | J13 | M-008428- potassium large condu       | 3779.00 | KCNMB1    | 2411.00 | 9.66 |
| 50048.00 | J14 | M-006447- methionyl-tRNA synth        | 4141.00 | MARS      | 2770.00 | 8.95 |
| 50048.00 | J15 | M-006268- potassium intermediat       | 3780.00 | KCNN1     | 2168.00 | 5.72 |
| 50048.00 | J16 | M-026713- microtubule-associater      | 4135.00 | MAP6      | 2580.00 | 3.06 |
| 50048.00 | J17 | M-006269- potassium intermediat       | 3781.00 | KCNN2     | 3679.00 | 3.83 |
| 50048.00 | J18 | M-011724- microtubule-associater      | 4134.00 | MAP4      | 4225.00 | 4.05 |
| 50048.00 | J19 | M-004461- potassium intermediat       | 3783.00 | KCNN4     | 3695.00 | 4.65 |
| 50048.00 | J20 | M-009110- mannosidase, alpha, cl      | 4122.00 | MAN2A2    | 4552.00 | 8.11 |
| 50048.00 | J21 | M-018983- killer cell immunoglob      | 3805.00 | KIR2DL4   | 2285.00 | 1.40 |
| 50048.00 | J23 | M-019493- killer cell immunoglob      | 3808.00 | KIR2DS3   | 2193.00 | 1.69 |
| 50048.00 | K02 | M-013146- histone cluster 1, H2ae     | 3012.00 | HIST1H2AE | 2310.00 | 1.30 |
| 50048.00 | K04 | M-012050- histone cluster 1, H1t      | 3010.00 | HIST1H1T  | 2157.00 | 3.52 |
| 50048.00 | K05 | M-011282- glioblastoma amplified      | 2631.00 | GBAS      | 3513.00 | 3.22 |
| 50048.00 | K06 | M-012049- histone cluster 1, H1b      | 3009.00 | HIST1H1B  | 3261.00 | 2.36 |
| 50048.00 | K07 | M-031864- guanylate binding prot      | 2635.00 | GBP3      | 1850.00 | 3.41 |
| 50048.00 | K08 | M-012048- histone cluster 1, H1e      | 3008.00 | HIST1H1E  | 2875.00 | 0.87 |
| 50048.00 | K09 | M-012038- GTP cyclohydrolase I fe     | 2644.00 | GCHFR     | 3022.00 | 1.52 |
| 50048.00 | K10 | M-012046- histone cluster 1, H1d      | 3007.00 | HIST1H1D  | 2653.00 | 6.29 |
| 50048.00 | K11 | M-012580- biogenesis of lysosome      | 2647.00 | BLOC1S1   | 2104.00 | 1.85 |
| 50048.00 | K12 | M-005892- granzyme M (lymphoc         | 3004.00 | GZMM      | 1327.00 | 3.92 |
| 50048.00 | K13 | M-009722- GCN5 general control c      | 2648.00 | GCN5L2    | 2200.00 | 5.32 |
| 50048.00 | K14 | M-005891- granzyme K (granzyme        | 3003.00 | GZMK      | 2653.00 | 3.43 |
| 50048.00 | K15 | M-011284- glucosaminyl (N-acetyl      | 2650.00 | GCNT1     | 1857.00 | 1.88 |
| 50048.00 | K16 | M-005890- granzyme H (cathepsin       | 2999.00 | GZMH      | 3051.00 | 3.34 |
| 50048.00 | K17 | M-008833- glutamine-fructose-6-p      | 2673.00 | GFPT1     | 4643.00 | 2.89 |
| 50048.00 | K18 | M-011681- glycophorin E               | 2996.00 | GYPE      | 2796.00 | 1.47 |
| 50048.00 | K19 | M-005886- gamma-glutamyltransf        | 2686.00 | GGTL3     | 3676.00 | 1.50 |
| 50048.00 | K20 | M-011679- glycophorin B (MNS bl       | 2994.00 | GYPB      | 4253.00 | 3.15 |
| 50048.00 | K21 | M-009541- gamma-glutamyltransf        | 2687.00 | GGTLA1    | 2447.00 | 1.68 |
| 50048.00 | K23 | M-011670- glutamate-cysteine lig      | 2730.00 | GCLM      | 2907.00 | 2.55 |
| 50048.00 | L02 | M-012174- mannosidase, alpha, cl      | 4121.00 | MAN1A1    | 3084.00 | 2.66 |
| 50048.00 | L04 | M-011723- mal, T-cell differenti      | 4118.00 | MAL       | 3965.00 | 5.98 |
| 50048.00 | L05 | M-012814- killer cell immunoglob      | 3809.00 | KIR2DS4   | 2865.00 | 3.04 |
| 50048.00 | L06 | M-011327- mago-nashi homolog,         | 4116.00 | MAGOH     | 3875.00 | 3.12 |
| 50048.00 | L07 | M-020305- killer cell immunoglob      | 3811.00 | KIR3DL1   | 2057.00 | 1.26 |
| 50048.00 | L08 | M-019089- melanoma antigen far        | 4115.00 | MAGEB4    | 4958.00 | 5.89 |
| 50048.00 | L09 | M-019886- killer cell immunoglob      | 3812.00 | KIR3DL2   | 3215.00 | 2.74 |
| 50048.00 | L10 | M-011326- melanoma antigen far        | 4114.00 | MAGEB3    | 3307.00 | 6.77 |
| 50048.00 | L11 | M-005906- kallikrein 1                | 3816.00 | KLK1      | 2555.00 | 4.62 |
| 50048.00 | L12 | M-019094- melanoma antigen far        | 4113.00 | MAGEB2    | 2680.00 | 6.16 |
| 50048.00 | L13 | M-011301- killer cell lectin-like rec | 3820.00 | KLRB1     | 2503.00 | 6.63 |
| 50048.00 | L14 | M-011325- melanoma antigen far        | 4112.00 | MAGEB1    | 3661.00 | 4.62 |
| 50048.00 | L15 | M-021330- killer cell lectin-like rec | 3821.00 | KLRC1     | 2142.00 | 6.82 |

|          |            |                                              |                |              |                |             |
|----------|------------|----------------------------------------------|----------------|--------------|----------------|-------------|
| 50048.00 | L16        | M-010801- melanoma antigen far               | 4111.00        | MAGEA12      | 4052.00        | 2.12        |
| 50048.00 | L17        | M-011302- killer cell lectin-like rec        | 3822.00        | KLRC2        | 3898.00        | 3.64        |
| 50048.00 | L18        | M-017280- melanoma antigen far               | 4110.00        | MAGEA11      | 4943.00        | 3.80        |
| 50048.00 | <b>L19</b> | <b>M-011303- killer cell lectin-like rec</b> | <b>3823.00</b> | <b>KLRC3</b> | <b>3497.00</b> | <b>4.09</b> |
| 50048.00 | L20        | M-017215- melanoma antigen far               | 4109.00        | MAGEA10      | 3074.00        | 3.48        |
| 50048.00 | L21        | M-020008- keratin associated prot            | 3846.00        | KRTAP5-9     | 3099.00        | 1.90        |
| 50048.00 | L23        | M-011309- keratin 31                         | 3881.00        | KRT31        | 2450.00        | 1.96        |
| 50048.00 | M02        | M-006641- glycogenin 1                       | 2992.00        | GYG1         | 2205.00        | 0.41        |
| 50048.00 | M04        | M-021488- guanylate cyclase activ            | 2980.00        | GUCA2A       | 4062.00        | 0.84        |
| 50048.00 | M05        | M-011287- GLE1 RNA export medi               | 2733.00        | GLE1L        | 3500.00        | 2.06        |
| 50048.00 | M06        | M-006732- guanylate cyclase 1, so            | 2974.00        | GUCY1B2      | 2397.00        | 0.67        |
| 50048.00 | M07        | M-006183- glycine receptor, beta             | 2743.00        | GLRB         | 3596.00        | 2.86        |
| 50048.00 | M08        | M-029875- general transcription fi           | 2967.00        | GTF2H3       | 2579.00        | 0.58        |
| 50048.00 | M09        | M-004548- glutaminase                        | 2744.00        | GLS          | 1418.00        | 3.67        |
| 50048.00 | M10        | M-011178- glutathione S-transfera            | 2949.00        | GSTM5        | 4116.00        | 7.80        |
| 50048.00 | M11        | M-009067- glutamate dehydrogen               | 2747.00        | GLUD2        | 2907.00        | 1.41        |
| 50048.00 | M12        | M-017188- glutathione S-transfera            | 2948.00        | GSTM4        | 1457.00        | 0.34        |
| 50048.00 | M13        | M-008228- glutamate-ammonia lig              | 2752.00        | GLUL         | 3306.00        | 2.45        |
| 50048.00 | M14        | M-011177- glutathione S-transfera            | 2946.00        | GSTM2        | 1859.00        | 3.66        |
| 50048.00 | M15        | M-009803- GDP-mannose 4,6-deh                | 2762.00        | GMDS         | 2481.00        | 2.42        |
| 50048.00 | M16        | M-011289- glutathione S-transfera            | 2941.00        | GSTA4        | 2433.00        | 3.82        |
| 50048.00 | M17        | M-008435- guanine nucleotide bin             | 2768.00        | GNA12        | 3463.00        | 6.61        |
| 50048.00 | <b>M18</b> | <b>M-017293- glutathione S-transfera</b>     | <b>2940.00</b> | <b>GSTA3</b> | <b>3548.00</b> | <b>4.90</b> |
| 50048.00 | M19        | M-008349- guanine nucleotide bin             | 2774.00        | GNAL         | 3330.00        | 2.43        |
| 50048.00 | <b>M20</b> | <b>M-017461- glutathione S-transfera</b>     | <b>2939.00</b> | <b>GSTA2</b> | <b>4361.00</b> | <b>7.48</b> |
| 50048.00 | M21        | M-017241- guanine nucleotide bin             | 2783.00        | GNB2         | 2548.00        | 4.24        |
| 50048.00 | M23        | M-012700- guanine nucleotide bin             | 2792.00        | GNGT1        | 1581.00        | 3.98        |
| 50048.00 | N02        | M-017277- melanoma antigen far               | 4108.00        | MAGEA9       | 2901.00        | 3.65        |
| 50048.00 | N04        | M-017366- melanoma antigen far               | 4107.00        | MAGEA8       | 2642.00        | 1.78        |
| 50048.00 | N05        | M-011310- keratin 32                         | 3882.00        | KRT32        | 3486.00        | 1.26        |
| 50048.00 | N06        | M-019169- melanoma antigen far               | 4105.00        | MAGEA6       | 3211.00        | 3.80        |
| 50048.00 | N07        | M-011970- keratin 33A                        | 3883.00        | KRT33A       | 2313.00        | 4.89        |
| 50048.00 | N08        | M-010800- melanoma antigen far               | 4104.00        | MAGEA5       | 2684.00        | 14.61       |
| 50048.00 | N09        | M-011311- keratin 33B                        | 3884.00        | KRT33B       | 3715.00        | 6.76        |
| 50048.00 | N10        | M-017288- melanoma antigen far               | 4103.00        | MAGEA4       | 2453.00        | 3.22        |
| 50048.00 | N11        | M-013132- keratin 34                         | 3885.00        | KRT34        | 1406.00        | 6.19        |
| 50048.00 | N12        | M-006350- melanoma antigen far               | 4101.00        | MAGEA2       | 2198.00        | 4.28        |
| 50048.00 | N13        | M-013650- keratin 82                         | 3888.00        | KRT82        | 2191.00        | 7.76        |
| 50048.00 | N14        | M-006862- melanoma antigen far               | 4100.00        | MAGEA1       | 2243.00        | 1.52        |
| 50048.00 | N15        | M-011314- keratin 83                         | 3889.00        | KRT83        | 3769.00        | 6.47        |
| 50048.00 | N16        | M-011722- myelin associated glyco            | 4099.00        | MAG          | 2929.00        | 3.00        |
| 50048.00 | N17        | M-013651- keratin 84                         | 3890.00        | KRT84        | 3428.00        | 5.13        |
| 50048.00 | N18        | M-016057- cell cycle associated pr           | 4076.00        | CAPRIN1      | 2777.00        | 1.80        |
| 50048.00 | N19        | M-011315- keratin 85                         | 3891.00        | KRT85        | 3928.00        | 11.86       |
| 50048.00 | N20        | M-019607- lymphocyte antigen 75              | 4065.00        | LY75         | 2625.00        | 4.42        |
| 50048.00 | N21        | M-017231- ladinin 1                          | 3898.00        | LAD1         | 2337.00        | 5.05        |
| 50048.00 | N23        | M-012639- lactalbumin, alpha-                | 3906.00        | LALBA        | 3338.00        | 1.32        |

|              |                                   |                |         |       |
|--------------|-----------------------------------|----------------|---------|-------|
| 50048.00 O02 | M-009285- granulin                | 2896.00 GRN    | 2926.00 | 2.73  |
| 50048.00 O04 | M-007917- glutamate receptor, io  | 2894.00 GRID1  | 2443.00 | 2.70  |
| 50048.00 O05 | M-012042- guanine nucleotide bin  | 2793.00 GNGT2  | 1159.00 | 2.07  |
| 50048.00 O06 | M-009875- glutathione peroxidase  | 2882.00 GPX7   | 1834.00 | 3.05  |
| 50048.00 O07 | M-012043- guanine nucleotide bin  | 2794.00 GNL1   | 2132.00 | 2.11  |
| 50048.00 O08 | M-009445- glutathione peroxidase  | 2880.00 GPX5   | 1458.00 | 1.58  |
| 50048.00 O09 | M-011672- golgi autoantigen, golg | 2800.00 GOLGA1 | 2592.00 | 3.90  |
| 50048.00 O10 | M-011676- glutathione peroxidase  | 2879.00 GPX4   | 316.00  | 23.10 |
| 50048.00 O11 | M-017282- golgi autoantigen, golg | 2801.00 GOLGA2 | 1605.00 | 1.25  |
| 50048.00 O12 | M-006485- glutathione peroxidase  | 2878.00 GPX3   | 1164.00 | 2.92  |
| 50048.00 O13 | M-012165- golgi autoantigen, golg | 2802.00 GOLGA3 | 1573.00 | 1.84  |
| 50048.00 O14 | M-031622- glutamic-pyruvate trar  | 2875.00 GPT    | 1897.00 | 1.16  |
| 50048.00 O15 | M-012396- golgi autoantigen, golg | 2803.00 GOLGA4 | 1971.00 | 1.47  |
| 50048.00 O16 | M-018825- glycoprotein M6B        | 2824.00 GPM6B  | 2458.00 | 3.95  |
| 50048.00 O17 | M-011673- glutamic-oxaloacetic tr | 2805.00 GOT1   | 3339.00 | 4.76  |
| 50048.00 O18 | M-010598- glycoprotein M6A        | 2823.00 GPM6A  | 3035.00 | 3.86  |
| 50048.00 O19 | M-011674- glutamic-oxaloacetic tr | 2806.00 GOT2   | 1516.00 | 5.34  |
| 50048.00 O20 | M-009792- glycosylphosphatidylin  | 2822.00 GPLD1  | 3251.00 | 1.14  |
| 50048.00 O21 | M-020171- glycoprotein 2 (zymog)  | 2813.00 GP2    | 1521.00 | 0.66  |
| 50048.00 O23 | M-004303- glypican 1              | 2817.00 GPC1   | 1296.00 | 5.09  |
| 50048.00 P02 | M-010030- lymphocyte antigen 9    | 4063.00 LY9    | 2411.00 | 8.38  |
| 50048.00 P04 | M-019608- lymphocyte antigen 6    | 4062.00 LY6H   | 2320.00 | 3.62  |
| 50048.00 P05 | M-017237- laminin, alpha 5        | 3911.00 LAMA5  | 717.00  | 9.34  |
| 50048.00 P06 | M-012587- lymphocyte antigen 6    | 4061.00 LY6E   | 1402.00 | 5.78  |
| 50048.00 P07 | M-013481- lysosomal-associated r  | 3916.00 LAMP1  | 1195.00 | 8.12  |
| 50048.00 P08 | M-009132- cytochrome P450, fam    | 4051.00 CYP4F3 | 2224.00 | 4.00  |
| 50048.00 P09 | M-010519- LIM and SH3 protein 1   | 3927.00 LASP1  | 2552.00 | 5.02  |
| 50048.00 P10 | M-011322- limbic system-associat  | 4045.00 LSAMP  | 2456.00 | 4.93  |
| 50048.00 P11 | M-011716- lymphocyte cytosolic p  | 3936.00 LCP1   | 1591.00 | 6.03  |
| 50048.00 P12 | M-027194- low density lipoproteir | 4038.00 LRP4   | 1686.00 | 7.53  |
| 50048.00 P13 | M-012585- leukocyte cell-derived  | 3950.00 LECT2  | 2501.00 | 8.00  |
| 50048.00 P14 | M-011321- leucine-rich repeats an | 4034.00 LRCH4  | 2151.00 | 3.39  |
| 50048.00 P15 | M-019549- leucine zipper-EF-hand  | 3954.00 LETM1  | 2931.00 | 3.92  |
| 50048.00 P16 | M-023219- lactoperoxidase         | 4025.00 LPO    | 2401.00 | 1.00  |
| 50048.00 P17 | M-008210- fatty acid desaturase 1 | 3992.00 FADS1  | 2094.00 | 3.06  |
| 50048.00 P18 | M-008020- lysyl oxidase-like 2    | 4017.00 LOXL2  | 1621.00 | 4.01  |
| 50048.00 P19 | M-019812- lethal giant larvae hor | 3993.00 LLGL2  | 837.00  | 4.18  |
| 50048.00 P20 | M-004645- lysyl oxidase-like 1    | 4016.00 LOXL1  | 1226.00 | 7.67  |
| 50048.00 P21 | M-008483- fatty acid desaturase 3 | 3995.00 FADS3  | 787.00  | 2.29  |
| 50048.00 P23 | M-013079- LIM domain only 6       | 4007.00 LMO6   | 468.00  | 1.07  |
|              |                                   | mdn            | 2437.00 | 2.69  |
|              |                                   | 3xMAD          |         |       |
|              |                                   | MADc           |         |       |
| 50048.00 C22 |                                   |                | 4656.00 | 38.25 |
| 50048.00 D22 |                                   |                | 3935.00 | 25.85 |
| 50048.00 E22 |                                   | 3011.00        | 8.57    |       |
| 50048.00 F22 |                                   | 3062.00        | 16.04   |       |

|              |                                            |         |           |         |       |
|--------------|--------------------------------------------|---------|-----------|---------|-------|
|              |                                            |         | mn        | 4295.50 | 32.05 |
|              |                                            |         | sd        | 509.82  | 8.77  |
| 50048.00 G22 |                                            |         |           | 632.00  | 0.32  |
| 50048.00 H22 |                                            |         |           | 903.00  | 0.66  |
| 50048.00 I22 |                                            |         |           | 881.00  | 1.02  |
| 50048.00 J22 |                                            |         |           | 1359.00 | 2.80  |
|              |                                            |         | mn        | 943.75  | 1.20  |
|              |                                            |         | sd        | 302.89  | 1.10  |
|              |                                            |         | 3psSD     |         | 26.32 |
|              |                                            |         | 3ngSD     |         | 3.31  |
|              |                                            |         | SumSD     |         | 29.63 |
|              |                                            |         | DiffMn    |         | 30.85 |
|              |                                            |         | SmovrDiff |         | 0.96  |
|              |                                            |         | 1minus    |         | 0.04  |
| 50048.00 G03 | M-003290- polo-like kinase 1 (Dro          | 5347.00 | PLK1 SMAF | 161.00  | 2.48  |
| 50048.00 H03 | M-003290- polo-like kinase 1 (Dro          | 5347.00 | PLK1 SMAF | 145.00  | 1.38  |
| 50048.00 I03 | D-001206- siControl non-targeting siRNA #2 |         |           | 1154.00 | 3.73  |
| 50048.00 J03 | D-001206- siControl non-targeting siRNA #2 |         |           | 1803.00 | 4.05  |
| 50048.00 K03 | D-001600- (siGLO RISC-free siRNA           |         |           | 5914.00 | 9.11  |
| 50048.00 L03 | D-001600- (siGLO RISC-free siRNA           |         |           | 5258.00 | 4.39  |

| Abs Dev | rZ    | Cell Count | % inf | Abs Dev | rZ    | Cell Count | % inf | Abs Dev |
|---------|-------|------------|-------|---------|-------|------------|-------|---------|
| 2.54    | -1.15 | 834.00     | 0.72  | 1.99    | -0.92 | 2112.00    | 0.57  | 2.54    |
| 2.24    | -1.01 | 2656.00    | 1.32  | 1.39    | -0.65 | 2704.00    | 0.70  | 2.41    |
| 2.25    | -1.02 | 1499.00    | 3.54  | 0.83    | 0.38  | 966.00     | 3.42  | 0.31    |
| 2.40    | -1.08 | 2530.00    | 0.87  | 1.84    | -0.85 | 2038.00    | 0.39  | 2.72    |
| 1.33    | -0.60 | 1946.00    | 2.77  | 0.06    | 0.03  | 1336.00    | 1.87  | 1.24    |
| 0.59    | -0.26 | 2548.00    | 1.14  | 1.57    | -0.73 | 2001.00    | 2.65  | 0.46    |
| 0.47    | -0.21 | 2174.00    | 3.50  | 0.79    | 0.36  | 1233.00    | 2.03  | 1.08    |
| 1.24    | -0.56 | 3095.00    | 1.32  | 1.39    | -0.64 | 2660.00    | 2.14  | 0.97    |
| 2.17    | -0.98 | 853.00     | 3.40  | 0.69    | 0.32  | 807.00     | 4.34  | 1.23    |
| 2.51    | -1.13 | 1159.00    | 1.29  | 1.42    | -0.66 | 689.00     | 0.29  | 2.82    |
| 2.69    | -1.21 | 975.00     | 2.67  | 0.04    | -0.02 | 983.00     | 0.51  | 2.60    |
| 1.50    | -0.68 | 2329.00    | 0.39  | 2.32    | -1.08 | 1347.00    | 2.52  | 0.59    |
| 1.25    | -0.56 | 1306.00    | 1.45  | 1.26    | -0.58 | 1605.00    | 1.12  | 1.99    |
| 1.70    | -0.77 | 2091.00    | 0.62  | 2.09    | -0.97 | 2761.00    | 1.09  | 2.02    |
| 0.37    | -0.17 | 2828.00    | 3.39  | 0.68    | 0.32  | 1729.00    | 1.74  | 1.37    |
| 5.13    | 2.32  | 1044.00    | 6.61  | 3.90    | 1.81  | 668.00     | 7.34  | 4.23    |
| 0.35    | -0.16 | 1966.00    | 3.00  | 0.29    | 0.13  | 2271.00    | 2.03  | 1.08    |
| 0.93    | 0.42  | 2097.00    | 5.05  | 2.34    | 1.09  | 2732.00    | 3.07  | 0.04    |
| 3.72    | 1.68  | 2021.00    | 6.93  | 4.22    | 1.95  | 2062.00    | 4.66  | 1.55    |
| 0.97    | -0.44 | 1315.00    | 4.11  | 1.40    | 0.65  | 1959.00    | 4.39  | 1.28    |
| 2.18    | -0.98 | 2613.00    | 1.76  | 0.95    | -0.44 | 1872.00    | 0.32  | 2.79    |
| 2.05    | -0.92 | 2862.00    | 5.35  | 2.64    | 1.22  | 2511.00    | 0.76  | 2.35    |
| 1.67    | -0.75 | 4046.00    | 1.26  | 1.45    | -0.67 | 2955.00    | 2.30  | 0.81    |
| 1.38    | -0.62 | 3237.00    | 1.51  | 1.20    | -0.56 | 3023.00    | 0.86  | 2.25    |
| 2.38    | -1.07 | 3187.00    | 0.35  | 2.36    | -1.10 | 1811.00    | 0.50  | 2.61    |
| 1.53    | -0.69 | 1844.00    | 0.87  | 1.84    | -0.85 | 1112.00    | 0.99  | 2.12    |
| 2.62    | -1.18 | 1815.00    | 0.17  | 2.54    | -1.18 | 632.00     | 2.06  | 1.05    |
| 0.69    | -0.31 | 4508.00    | 1.00  | 1.71    | -0.79 | 2269.00    | 2.60  | 0.51    |
| 1.51    | -0.68 | 3126.00    | 0.93  | 1.78    | -0.83 | 1987.00    | 0.86  | 2.25    |
| 3.90    | 1.76  | 1200.00    | 2.50  | 0.21    | -0.10 | 875.00     | 1.26  | 1.85    |
| 1.43    | -0.64 | 1908.00    | 0.52  | 2.19    | -1.01 | 2107.00    | 2.33  | 0.78    |
| 0.69    | 0.31  | 2994.00    | 2.07  | 0.64    | -0.30 | 2420.00    | 2.48  | 0.63    |
| 1.35    | -0.61 | 3576.00    | 1.59  | 1.12    | -0.52 | 2662.00    | 4.55  | 1.44    |
| 3.19    | 1.44  | 2504.00    | 2.68  | 0.03    | -0.02 | 1983.00    | 6.30  | 3.19    |
| 0.45    | -0.20 | 4349.00    | 1.13  | 1.58    | -0.73 | 2685.00    | 1.83  | 1.29    |
| 3.22    | 1.45  | 3286.00    | 3.07  | 0.36    | 0.17  | 2824.00    | 4.60  | 1.49    |
| 1.32    | -0.60 | 3246.00    | 1.79  | 0.92    | -0.43 | 2039.00    | 0.74  | 2.37    |
| 1.14    | -0.51 | 2319.00    | 1.03  | 1.68    | -0.78 | 2370.00    | 1.86  | 1.25    |
| 0.92    | -0.42 | 3356.00    | 0.86  | 1.85    | -0.86 | 3688.00    | 4.23  | 1.12    |
| 0.46    | -0.21 | 2041.00    | 3.63  | 0.92    | 0.42  | 1953.00    | 1.79  | 1.32    |
| 1.63    | -0.73 | 3308.00    | 5.26  | 2.55    | 1.18  | 3498.00    | 1.49  | 1.62    |
| 0.19    | 0.08  | 2120.00    | 2.59  | 0.12    | -0.05 | 2551.00    | 2.39  | 0.72    |
| 2.07    | -0.94 | 2967.00    | 3.37  | 0.66    | 0.30  | 2171.00    | 4.10  | 0.99    |
| 1.48    | 0.67  | 4312.00    | 5.54  | 2.83    | 1.31  | 2828.00    | 3.96  | 0.85    |
| 0.57    | -0.25 | 2669.00    | 5.96  | 3.25    | 1.50  | 1740.00    | 1.84  | 1.27    |
| 0.96    | -0.43 | 2281.00    | 1.58  | 1.13    | -0.53 | 763.00     | 1.57  | 1.54    |

|      |       |         |      |      |       |         |      |      |
|------|-------|---------|------|------|-------|---------|------|------|
| 1.61 | -0.73 | 1523.00 | 3.74 | 1.03 | 0.48  | 639.00  | 1.88 | 1.23 |
| 3.71 | 1.68  | 2325.00 | 9.38 | 6.67 | 3.09  | 1244.00 | 8.44 | 5.33 |
| 3.29 | 1.48  | 2450.00 | 6.78 | 4.07 | 1.88  | 1443.00 | 2.98 | 0.13 |
| 3.22 | 1.46  | 1249.00 | 2.80 | 0.09 | 0.04  | 1554.00 | 1.42 | 1.69 |
| 1.75 | 0.79  | 2490.00 | 3.94 | 1.23 | 0.57  | 2291.00 | 2.75 | 0.36 |
| 5.28 | 2.38  | 3979.00 | 7.87 | 5.16 | 2.39  | 3071.00 | 4.66 | 1.55 |
| 1.51 | -0.68 | 2209.00 | 1.04 | 1.67 | -0.77 | 1206.00 | 1.66 | 1.45 |
| 1.56 | -0.71 | 2275.00 | 1.54 | 1.17 | -0.54 | 1787.00 | 0.78 | 2.33 |
| 6.42 | 2.90  | 3355.00 | 7.78 | 5.07 | 2.35  | 2702.00 | 6.33 | 3.22 |
| 0.60 | -0.27 | 1783.00 | 1.18 | 1.53 | -0.71 | 1379.00 | 1.09 | 2.02 |
| 1.24 | -0.56 | 2070.00 | 3.33 | 0.62 | 0.29  | 1639.00 | 2.32 | 0.79 |
| 0.14 | -0.06 | 1434.00 | 5.02 | 2.31 | 1.07  | 1632.00 | 2.21 | 0.90 |
| 1.25 | -0.56 | 3574.00 | 1.37 | 1.34 | -0.62 | 5061.00 | 1.54 | 1.57 |
| 1.36 | 0.61  | 2308.00 | 4.51 | 1.80 | 0.83  | 1410.00 | 2.48 | 0.63 |
| 1.90 | -0.86 | 2456.00 | 0.33 | 2.38 | -1.11 | 3862.00 | 1.89 | 1.22 |
| 1.28 | -0.58 | 3187.00 | 0.82 | 1.89 | -0.88 | 2665.00 | 5.70 | 2.59 |
| 2.13 | -0.96 | 2248.00 | 0.58 | 2.13 | -0.99 | 1581.00 | 2.09 | 1.02 |
| 0.97 | -0.44 | 4139.00 | 3.62 | 0.91 | 0.42  | 3250.00 | 5.63 | 2.52 |
| 1.64 | -0.74 | 2042.00 | 0.69 | 2.02 | -0.94 | 1712.00 | 2.39 | 0.72 |
| 2.08 | -0.94 | 3364.00 | 1.61 | 1.10 | -0.51 | 2251.00 | 0.80 | 2.31 |
| 1.23 | 0.56  | 2781.00 | 2.16 | 0.55 | -0.26 | 1725.00 | 3.77 | 0.66 |
| 0.82 | -0.37 | 2361.00 | 2.16 | 0.55 | -0.26 | 1337.00 | 2.84 | 0.27 |
| 0.74 | -0.33 | 2358.00 | 1.36 | 1.35 | -0.63 | 1497.00 | 2.07 | 1.04 |
| 0.60 | -0.27 | 2191.00 | 2.56 | 0.15 | -0.07 | 1913.00 | 4.34 | 1.23 |
| 4.66 | 2.10  | 2109.00 | 2.04 | 0.67 | -0.31 | 2513.00 | 4.85 | 1.74 |
| 0.42 | 0.19  | 2889.00 | 1.49 | 1.22 | -0.57 | 2132.00 | 4.22 | 1.11 |
| 1.77 | -0.80 | 2342.00 | 0.21 | 2.50 | -1.16 | 791.00  | 1.01 | 2.10 |
| 1.90 | 0.86  | 3265.00 | 1.90 | 0.81 | -0.38 | 2194.00 | 1.96 | 1.15 |
| 2.78 | 1.25  | 3773.00 | 0.93 | 1.78 | -0.83 | 1974.00 | 3.95 | 0.84 |
| 2.36 | 1.06  | 4039.00 | 2.13 | 0.58 | -0.27 | 3472.00 | 3.23 | 0.12 |
| 2.30 | 1.04  | 3189.00 | 1.85 | 0.86 | -0.40 | 2809.00 | 5.38 | 2.27 |
| 3.75 | 1.69  | 4057.00 | 6.38 | 3.67 | 1.70  | 3072.00 | 6.67 | 3.56 |
| 1.46 | 0.66  | 2100.00 | 0.95 | 1.76 | -0.82 | 2434.00 | 1.60 | 1.51 |
| 1.86 | 0.84  | 1594.00 | 1.38 | 1.33 | -0.62 | 2066.00 | 1.79 | 1.32 |
| 2.35 | -1.06 | 1670.00 | 1.38 | 1.33 | -0.62 | 4384.00 | 0.80 | 2.31 |
| 1.40 | -0.63 | 1722.00 | 1.28 | 1.43 | -0.66 | 2429.00 | 1.28 | 1.83 |
| 0.95 | -0.43 | 3354.00 | 3.82 | 1.11 | 0.51  | 3363.00 | 1.67 | 1.44 |
| 2.54 | -1.15 | 2256.00 | 0.27 | 2.44 | -1.13 | 2210.00 | 0.27 | 2.84 |
| 1.70 | -0.77 | 2485.00 | 0.93 | 1.78 | -0.83 | 2400.00 | 0.79 | 2.32 |
| 2.08 | -0.94 | 1270.00 | 0.08 | 2.63 | -1.22 | 774.00  | 0.78 | 2.33 |
| 2.37 | -1.07 | 2866.00 | 2.34 | 0.37 | -0.17 | 2251.00 | 9.24 | 6.13 |
| 2.49 | -1.13 | 2284.00 | 0.79 | 1.92 | -0.89 | 1888.00 | 0.21 | 2.90 |
| 2.40 | -1.09 | 2459.00 | 1.42 | 1.29 | -0.60 | 1685.00 | 0.12 | 2.99 |
| 2.44 | -1.10 | 1068.00 | 0.09 | 2.62 | -1.21 | 991.00  | 0.20 | 2.91 |
| 2.41 | -1.09 | 1106.00 | 4.52 | 1.81 | 0.84  | 1495.00 | 1.54 | 1.57 |
| 2.18 | -0.99 | 1285.00 | 1.09 | 1.62 | -0.75 | 1367.00 | 0.66 | 2.45 |
| 1.62 | -0.73 | 2612.00 | 1.23 | 1.48 | -0.69 | 2515.00 | 1.39 | 1.72 |

|             |             |                |             |             |             |                |              |              |
|-------------|-------------|----------------|-------------|-------------|-------------|----------------|--------------|--------------|
| 2.48        | -1.12       | 1752.00        | 0.11        | 2.60        | -1.20       | 1786.00        | 0.62         | 2.49         |
| 2.37        | -1.07       | 2515.00        | 0.80        | 1.91        | -0.89       | 1645.00        | 0.91         | 2.20         |
| 2.57        | -1.16       | 1565.00        | 1.21        | 1.50        | -0.69       | 1378.00        | 0.58         | 2.53         |
| 2.50        | -1.13       | 1260.00        | 1.43        | 1.28        | -0.60       | 1603.00        | 0.75         | 2.36         |
| 2.57        | -1.16       | 1333.00        | 0.83        | 1.88        | -0.87       | 1050.00        | 0.48         | 2.63         |
| 2.60        | -1.18       | 3029.00        | 1.02        | 1.69        | -0.78       | 3605.00        | 0.86         | 2.25         |
| 2.36        | -1.07       | 1476.00        | 0.68        | 2.03        | -0.94       | 2242.00        | 2.19         | 0.92         |
| 1.85        | -0.83       | 989.00         | 0.91        | 1.80        | -0.84       | 2131.00        | 2.77         | 0.34         |
| 1.46        | 0.66        | 2071.00        | 2.46        | 0.25        | -0.12       | 2140.00        | 5.84         | 2.73         |
| 2.16        | -0.98       | 2821.00        | 0.50        | 2.21        | -1.03       | 3132.00        | 3.03         | 0.08         |
| <b>5.64</b> | <b>2.55</b> | <b>2862.00</b> | <b>6.36</b> | <b>3.65</b> | <b>1.69</b> | <b>2287.00</b> | <b>14.21</b> | <b>11.10</b> |
| 0.88        | -0.40       | 464.00         | 0.86        | 1.85        | -0.86       | 476.00         | 9.66         | <b>6.55</b>  |
| 1.78        | -0.81       | 1994.00        | 1.86        | 0.85        | -0.40       | 1439.00        | 2.92         | 0.19         |
| 0.08        | 0.03        | 2442.00        | 3.15        | 0.44        | 0.20        | 2337.00        | 8.04         | 4.93         |
| 0.42        | -0.19       | 1759.00        | 0.17        | 2.54        | -1.18       | 1781.00        | 4.94         | 1.83         |
| 1.46        | -0.66       | 1991.00        | 0.30        | 2.41        | -1.12       | 1879.00        | 4.42         | 1.31         |
| 1.12        | -0.50       | 1583.00        | 0.51        | 2.20        | -1.02       | 2001.00        | 7.60         | 4.49         |
| 2.01        | -0.91       | 984.00         | 0.30        | 2.41        | -1.12       | 1272.00        | 1.65         | 1.46         |
| 1.01        | -0.46       | 2220.00        | 0.50        | 2.21        | -1.03       | 2097.00        | 4.34         | 1.23         |
| 2.08        | -0.94       | 2044.00        | 0.83        | 1.88        | -0.87       | 1517.00        | 5.54         | 2.43         |
| <b>0.82</b> | <b>0.37</b> | <b>2793.00</b> | <b>7.84</b> | <b>5.13</b> | <b>2.38</b> | <b>2003.00</b> | <b>12.03</b> | <b>8.92</b>  |
| 2.31        | -1.04       | 1042.00        | 0.29        | 2.42        | -1.12       | 486.00         | 5.35         | 2.24         |
| 0.88        | -0.40       | 2848.00        | 0.98        | 1.73        | -0.80       | 2910.00        | 5.02         | 1.91         |
| 2.49        | -1.12       | 1940.00        | 0.72        | 1.99        | -0.92       | 2025.00        | 3.01         | 0.10         |
| 1.01        | -0.45       | 2205.00        | 0.32        | 2.39        | -1.11       | 3541.00        | 5.42         | 2.31         |
| <b>4.54</b> | <b>2.05</b> | <b>3435.00</b> | <b>6.78</b> | <b>4.07</b> | <b>1.89</b> | <b>2711.00</b> | <b>17.15</b> | <b>14.04</b> |
| 0.57        | -0.26       | 2668.00        | 1.46        | 1.25        | -0.58       | 3251.00        | 5.41         | 2.30         |
| 1.88        | -0.85       | 1850.00        | 1.30        | 1.41        | -0.66       | 2339.00        | 5.17         | 2.06         |
| 1.94        | -0.88       | 2699.00        | 1.70        | 1.01        | -0.47       | 3515.00        | 7.80         | 4.69         |
| 0.59        | -0.27       | 1710.00        | 1.52        | 1.19        | -0.55       | 1995.00        | 1.50         | 1.61         |
| 2.25        | 1.02        | 2753.00        | 5.16        | 2.45        | 1.13        | 2114.00        | 15.42        | <b>12.31</b> |
| 1.36        | -0.61       | 1947.00        | 0.92        | 1.79        | -0.83       | 1635.00        | 4.95         | 1.84         |
| 0.32        | 0.15        | 1284.00        | 0.70        | 2.01        | -0.93       | 1048.00        | 8.40         | 5.29         |
| 1.48        | -0.67       | 1751.00        | 1.66        | 1.05        | -0.49       | 810.00         | 3.70         | 0.59         |
| 1.35        | 0.61        | 1683.00        | 2.44        | 0.27        | -0.13       | 648.00         | 9.26         | <b>6.15</b>  |
| 1.27        | -0.57       | 1131.00        | 3.80        | 1.09        | 0.50        | 811.00         | 5.18         | 2.07         |
| 2.81        | 1.27        | 2432.00        | 2.47        | 0.24        | -0.11       | 2749.00        | 9.60         | <b>6.49</b>  |
| 0.36        | -0.16       | 1124.00        | 2.22        | 0.49        | -0.23       | 1194.00        | 3.27         | 0.16         |
| 0.41        | 0.18        | 1889.00        | 1.11        | 1.60        | -0.74       | 1432.00        | 6.01         | 2.90         |
| 0.80        | 0.36        | 3692.00        | 1.27        | 1.44        | -0.67       | 2350.00        | 5.62         | 2.51         |
| 1.63        | -0.74       | 573.00         | 1.05        | 1.66        | -0.77       | 341.00         | 8.21         | 5.10         |
| 0.11        | -0.05       | 1534.00        | 4.50        | 1.79        | 0.83        | 640.00         | 6.41         | 3.30         |
| 0.14        | 0.06        | 2546.00        | 3.69        | 0.98        | 0.45        | 2058.00        | 6.95         | 3.84         |
| 0.37        | 0.17        | 1691.00        | 2.72        | 0.01        | 0.00        | 1096.00        | 2.55         | 0.56         |
| <b>5.95</b> | <b>2.68</b> | <b>4352.00</b> | <b>8.78</b> | <b>6.07</b> | <b>2.81</b> | <b>2798.00</b> | <b>7.04</b>  | <b>3.93</b>  |
| 0.99        | -0.45       | 3962.00        | 6.81        | 4.10        | 1.90        | 2452.00        | 3.83         | 0.72         |
| 0.07        | 0.03        | 2410.00        | 1.54        | 1.17        | -0.55       | 1810.00        | 1.38         | 1.73         |

|       |       |         |       |      |       |         |       |       |
|-------|-------|---------|-------|------|-------|---------|-------|-------|
| 2.45  | -1.11 | 2304.00 | 2.43  | 0.28 | -0.13 | 3474.00 | 3.89  | 0.78  |
| 0.25  | -0.11 | 1387.00 | 12.11 | 9.40 | 4.36  | 1559.00 | 6.74  | 3.63  |
| 0.70  | -0.32 | 2508.00 | 3.07  | 0.36 | 0.17  | 2723.00 | 4.26  | 1.15  |
| 2.26  | -1.02 | 1390.00 | 1.51  | 1.20 | -0.56 | 1707.00 | 2.05  | 1.06  |
| 2.02  | 0.91  | 2750.00 | 5.82  | 3.11 | 1.44  | 2344.00 | 9.22  | 6.11  |
| 0.69  | 0.31  | 509.00  | 2.16  | 0.55 | -0.26 | 691.00  | 17.37 | 14.26 |
| 0.84  | 0.38  | 3009.00 | 5.52  | 2.81 | 1.30  | 1788.00 | 3.30  | 0.19  |
| 0.42  | -0.19 | 2096.00 | 2.48  | 0.23 | -0.11 | 1652.00 | 2.48  | 0.63  |
| 0.50  | 0.23  | 2241.00 | 3.61  | 0.90 | 0.42  | 1970.00 | 3.50  | 0.39  |
| 1.97  | -0.89 | 1806.00 | 0.50  | 2.21 | -1.03 | 2001.00 | 2.00  | 1.11  |
| 1.65  | -0.74 | 957.00  | 2.61  | 0.10 | -0.05 | 1015.00 | 6.11  | 3.00  |
| 2.72  | 1.23  | 3217.00 | 5.94  | 3.23 | 1.49  | 2724.00 | 15.86 | 12.75 |
| 1.32  | -0.59 | 1450.00 | 6.28  | 3.57 | 1.65  | 1538.00 | 4.81  | 1.70  |
| 4.52  | 2.04  | 2335.00 | 6.12  | 3.41 | 1.58  | 1741.00 | 9.94  | 6.83  |
| 0.44  | -0.20 | 2437.00 | 0.78  | 1.93 | -0.90 | 2171.00 | 2.03  | 1.08  |
| 0.16  | -0.07 | 3258.00 | 2.12  | 0.59 | -0.28 | 2610.00 | 3.41  | 0.30  |
| 0.81  | -0.36 | 2441.00 | 1.27  | 1.44 | -0.67 | 2838.00 | 2.78  | 0.33  |
| 1.33  | 0.60  | 2952.00 | 5.76  | 3.05 | 1.41  | 2142.00 | 5.70  | 2.59  |
| 0.37  | -0.17 | 2228.00 | 1.35  | 1.36 | -0.63 | 1851.00 | 1.08  | 2.03  |
| 0.05  | -0.02 | 2382.00 | 3.06  | 0.35 | 0.16  | 3228.00 | 5.14  | 2.03  |
| 0.63  | 0.29  | 2591.00 | 4.09  | 1.38 | 0.64  | 3471.00 | 2.16  | 0.95  |
| 3.64  | 1.64  | 2050.00 | 8.54  | 5.83 | 2.70  | 1753.00 | 0.68  | 2.43  |
| 2.20  | 0.99  | 2015.00 | 4.12  | 1.41 | 0.65  | 3175.00 | 1.54  | 1.57  |
| 2.32  | 1.05  | 1523.00 | 0.66  | 2.05 | -0.95 | 2591.00 | 0.66  | 2.45  |
| 3.23  | 1.46  | 2362.00 | 2.75  | 0.04 | 0.02  | 3532.00 | 3.40  | 0.29  |
| 8.47  | 3.82  | 2491.00 | 6.42  | 3.71 | 1.72  | 3340.00 | 5.48  | 2.37  |
| 2.98  | 1.35  | 1957.00 | 2.55  | 0.16 | -0.07 | 2555.00 | 1.41  | 1.70  |
| 1.23  | 0.56  | 1791.00 | 2.18  | 0.53 | -0.25 | 3105.00 | 8.37  | 5.26  |
| 1.14  | 0.51  | 2183.00 | 3.30  | 0.59 | 0.27  | 3180.00 | 3.21  | 0.10  |
| 2.71  | 1.22  | 1259.00 | 7.47  | 4.76 | 2.20  | 2360.00 | 5.21  | 2.10  |
| 2.59  | 1.17  | 728.00  | 3.57  | 0.86 | 0.40  | 1095.00 | 5.94  | 2.83  |
| 0.30  | 0.13  | 1141.00 | 2.89  | 0.18 | 0.08  | 2183.00 | 1.92  | 1.19  |
| 2.21  | 1.00  | 2965.00 | 4.42  | 1.71 | 0.79  | 3076.00 | 8.32  | 5.21  |
| 2.29  | 1.03  | 2749.00 | 5.60  | 2.89 | 1.34  | 3858.00 | 6.12  | 3.01  |
| 3.48  | 1.57  | 953.00  | 7.45  | 4.74 | 2.20  | 1411.00 | 8.86  | 5.75  |
| 4.81  | 2.17  | 1920.00 | 8.13  | 5.42 | 2.51  | 3880.00 | 22.37 | 19.26 |
| 1.52  | -0.69 | 809.00  | 3.46  | 0.75 | 0.35  | 1919.00 | 3.13  | 0.02  |
| 0.96  | 0.44  | 2477.00 | 6.34  | 3.63 | 1.68  | 3542.00 | 4.18  | 1.07  |
| 7.01  | 3.16  | 1862.00 | 11.55 | 8.84 | 4.09  | 2345.00 | 21.37 | 18.26 |
| 0.37  | -0.17 | 1786.00 | 3.92  | 1.21 | 0.56  | 4032.00 | 7.89  | 4.78  |
| 2.76  | 1.25  | 1675.00 | 1.37  | 1.34 | -0.62 | 2826.00 | 1.70  | 1.41  |
| 3.19  | 1.44  | 812.00  | 4.31  | 1.60 | 0.74  | 1250.00 | 3.20  | 0.09  |
| 11.07 | 4.99  | 1616.00 | 5.63  | 2.92 | 1.35  | 2679.00 | 8.29  | 5.18  |
| 0.01  | -0.01 | 1717.00 | 1.05  | 1.66 | -0.77 | 3228.00 | 1.12  | 1.99  |
| 0.63  | -0.29 | 1683.00 | 3.39  | 0.68 | 0.31  | 2192.00 | 1.23  | 1.88  |
| 1.16  | 0.52  | 2141.00 | 1.68  | 1.03 | -0.48 | 3282.00 | 1.46  | 1.65  |



|      |       |         |       |      |       |         |       |       |
|------|-------|---------|-------|------|-------|---------|-------|-------|
| 1.61 | 0.73  | 1760.00 | 2.22  | 0.49 | -0.23 | 1662.00 | 1.08  | 2.03  |
| 3.32 | 1.50  | 1405.00 | 2.70  | 0.01 | 0.00  | 1911.00 | 1.15  | 1.96  |
| 6.40 | 2.89  | 1144.00 | 6.47  | 3.76 | 1.74  | 1941.00 | 7.78  | 4.67  |
| 1.18 | 0.53  | 1126.00 | 2.66  | 0.05 | -0.02 | 1446.00 | 2.28  | 0.83  |
| 6.97 | 3.15  | 1574.00 | 4.45  | 1.74 | 0.80  | 1848.00 | 2.16  | 0.95  |
| 6.26 | 2.83  | 1431.00 | 5.94  | 3.23 | 1.50  | 1834.00 | 4.63  | 1.52  |
| 3.03 | 1.37  | 1329.00 | 2.03  | 0.68 | -0.32 | 2649.00 | 3.32  | 0.21  |
| 0.37 | 0.17  | 1291.00 | 2.94  | 0.23 | 0.11  | 1772.00 | 1.75  | 1.36  |
| 1.14 | 0.52  | 2641.00 | 1.97  | 0.74 | -0.34 | 3864.00 | 1.79  | 1.32  |
| 1.36 | 0.61  | 2196.00 | 1.28  | 1.44 | -0.67 | 4417.00 | 0.77  | 2.34  |
| 1.96 | 0.89  | 2819.00 | 2.13  | 0.58 | -0.27 | 2944.00 | 3.29  | 0.18  |
| 5.42 | 2.44  | 3165.00 | 7.87  | 5.16 | 2.39  | 4917.00 | 8.40  | 5.29  |
| 1.29 | -0.58 | 1316.00 | 2.89  | 0.18 | 0.08  | 1685.00 | 0.65  | 2.46  |
| 1.00 | -0.45 | 1846.00 | 1.84  | 0.87 | -0.40 | 2874.00 | 0.38  | 2.73  |
| 1.39 | -0.63 | 1766.00 | 1.53  | 1.18 | -0.55 | 2101.00 | 2.95  | 0.16  |
| 0.83 | 0.38  | 1435.00 | 3.76  | 1.05 | 0.49  | 2110.00 | 4.27  | 1.16  |
| 0.53 | 0.24  | 2578.00 | 3.10  | 0.39 | 0.18  | 4176.00 | 5.39  | 2.28  |
| 0.33 | -0.15 | 1878.00 | 4.42  | 1.71 | 0.79  | 3750.00 | 4.56  | 1.45  |
| 0.72 | 0.32  | 1626.00 | 8.12  | 5.41 | 2.51  | 2431.00 | 6.58  | 3.47  |
| 1.82 | -0.82 | 1840.00 | 1.74  | 0.97 | -0.45 | 4208.00 | 3.75  | 0.64  |
| 1.17 | -0.53 | 1429.00 | 3.15  | 0.44 | 0.20  | 2828.00 | 3.57  | 0.46  |
| 3.60 | 1.63  | 1677.00 | 6.68  | 3.97 | 1.84  | 2401.00 | 5.62  | 2.51  |
| 0.84 | -0.38 | 1646.00 | 2.98  | 0.27 | 0.12  | 1828.00 | 3.01  | 0.10  |
| 1.23 | 0.55  | 434.00  | 5.76  | 3.05 | 1.41  | 942.00  | 4.46  | 1.35  |
| 2.63 | 1.19  | 1728.00 | 9.49  | 6.78 | 3.14  | 1747.00 | 3.49  | 0.38  |
| 0.74 | 0.33  | 1513.00 | 3.50  | 0.79 | 0.37  | 2938.00 | 8.48  | 5.37  |
| 0.81 | -0.36 | 1349.00 | 2.74  | 0.03 | 0.01  | 1404.00 | 0.85  | 2.26  |
| 0.65 | 0.29  | 1600.00 | 7.06  | 4.35 | 2.02  | 1498.00 | 4.21  | 1.10  |
| 0.20 | 0.09  | 2999.00 | 2.47  | 0.24 | -0.11 | 3650.00 | 6.27  | 3.16  |
| 1.22 | -0.55 | 2084.00 | 0.62  | 2.09 | -0.97 | 3160.00 | 3.29  | 0.18  |
| 1.19 | -0.54 | 1602.00 | 1.94  | 0.77 | -0.36 | 3643.00 | 4.50  | 1.39  |
| 0.46 | 0.21  | 3438.00 | 6.98  | 4.27 | 1.98  | 4598.00 | 5.83  | 2.72  |
| 1.01 | -0.46 | 1409.00 | 2.41  | 0.30 | -0.14 | 2558.00 | 3.36  | 0.25  |
| 0.14 | -0.07 | 2779.00 | 2.45  | 0.26 | -0.12 | 3635.00 | 5.53  | 2.42  |
| 0.03 | -0.01 | 3370.00 | 1.16  | 1.55 | -0.72 | 2299.00 | 1.30  | 1.81  |
| 3.29 | 1.48  | 2228.00 | 3.73  | 1.02 | 0.47  | 3381.00 | 6.45  | 3.34  |
| 0.35 | 0.16  | 2165.00 | 3.14  | 0.43 | 0.20  | 2765.00 | 6.69  | 3.58  |
| 0.43 | 0.20  | 3026.00 | 6.74  | 4.03 | 1.87  | 3859.00 | 6.19  | 3.08  |
| 1.43 | -0.64 | 840.00  | 3.10  | 0.39 | 0.18  | 1706.00 | 2.34  | 0.77  |
| 3.20 | 1.44  | 2799.00 | 3.61  | 0.90 | 0.42  | 4007.00 | 2.60  | 0.51  |
| 0.05 | 0.02  | 2014.00 | 7.50  | 4.79 | 2.22  | 4150.00 | 7.23  | 4.12  |
| 4.08 | 1.84  | 2436.00 | 7.92  | 5.21 | 2.41  | 3241.00 | 7.99  | 4.88  |
| 1.93 | 0.87  | 628.00  | 11.94 | 9.23 | 4.28  | 1590.00 | 13.46 | 10.35 |
| 3.47 | 1.56  | 1949.00 | 5.85  | 3.14 | 1.45  | 3061.00 | 9.93  | 6.82  |
| 3.94 | 1.78  | 1011.00 | 2.87  | 0.16 | 0.07  | 1506.00 | 8.57  | 5.46  |
| 1.93 | 0.87  | 2400.00 | 7.92  | 5.21 | 2.41  | 3399.00 | 10.53 | 7.42  |
| 4.13 | 1.86  | 660.00  | 2.42  | 0.29 | -0.13 | 1603.00 | 4.12  | 1.01  |

|       |       |         |       |      |       |         |       |      |
|-------|-------|---------|-------|------|-------|---------|-------|------|
| 0.57  | -0.26 | 1838.00 | 2.29  | 0.42 | -0.20 | 2887.00 | 5.75  | 2.64 |
| 0.95  | 0.43  | 1317.00 | 2.81  | 0.10 | 0.04  | 3495.00 | 3.83  | 0.72 |
| 1.11  | 0.50  | 2131.00 | 4.55  | 1.84 | 0.85  | 4154.00 | 5.83  | 2.72 |
| 1.40  | 0.63  | 1421.00 | 8.94  | 6.23 | 2.89  | 3833.00 | 9.60  | 6.49 |
| 0.79  | 0.36  | 1685.00 | 4.69  | 1.98 | 0.92  | 3463.00 | 4.97  | 1.86 |
| 0.79  | -0.35 | 1133.00 | 4.41  | 1.70 | 0.79  | 3222.00 | 4.72  | 1.61 |
| 0.73  | -0.33 | 1966.00 | 2.24  | 0.47 | -0.22 | 2582.00 | 0.70  | 2.41 |
| 2.28  | -1.03 | 1358.00 | 0.74  | 1.97 | -0.92 | 2565.00 | 3.04  | 0.07 |
| 1.85  | -0.84 | 2228.00 | 3.28  | 0.57 | 0.26  | 5120.00 | 3.54  | 0.43 |
| 0.63  | -0.29 | 756.00  | 2.51  | 0.20 | -0.09 | 3296.00 | 6.55  | 3.44 |
| 2.02  | -0.91 | 903.00  | 2.10  | 0.61 | -0.28 | 2641.00 | 4.35  | 1.24 |
| 0.17  | 0.08  | 2152.00 | 3.67  | 0.96 | 0.44  | 4289.00 | 3.96  | 0.85 |
| 2.11  | -0.95 | 1346.00 | 1.19  | 1.52 | -0.71 | 2842.00 | 1.09  | 2.02 |
| 0.98  | 0.44  | 431.00  | 4.18  | 1.47 | 0.68  | 1810.00 | 1.60  | 1.51 |
| 5.11  | 2.31  | 591.00  | 2.20  | 0.51 | -0.24 | 2470.00 | 4.66  | 1.55 |
| 1.28  | -0.58 | 872.00  | 1.95  | 0.76 | -0.35 | 2781.00 | 3.09  | 0.02 |
| 2.35  | -1.06 | 520.00  | 4.81  | 2.10 | 0.97  | 1547.00 | 2.91  | 0.20 |
| 0.24  | -0.11 | 1057.00 | 3.31  | 0.60 | 0.28  | 4288.00 | 3.54  | 0.43 |
| 0.97  | 0.44  | 855.00  | 7.72  | 5.01 | 2.32  | 2289.00 | 2.27  | 0.84 |
| 0.27  | -0.12 | 1171.00 | 1.96  | 0.75 | -0.35 | 2681.00 | 1.08  | 2.03 |
| 1.13  | 0.51  | 819.00  | 6.11  | 3.40 | 1.57  | 3499.00 | 4.32  | 1.21 |
| 3.92  | 1.77  | 1088.00 | 6.53  | 3.82 | 1.77  | 2694.00 | 9.17  | 6.06 |
| 2.21  | 1.00  | 2490.00 | 8.67  | 5.96 | 2.76  | 5341.00 | 12.54 | 9.43 |
| 0.26  | -0.12 | 1425.00 | 3.44  | 0.73 | 0.34  | 3649.00 | 2.80  | 0.31 |
| 4.79  | 2.16  | 2861.00 | 8.39  | 5.68 | 2.63  | 3729.00 | 6.09  | 2.98 |
| 1.55  | 0.70  | 919.00  | 5.33  | 2.62 | 1.21  | 3048.00 | 2.79  | 0.32 |
| 1.29  | 0.58  | 552.00  | 8.70  | 5.99 | 2.77  | 1317.00 | 6.00  | 2.89 |
| 0.96  | 0.44  | 1901.00 | 1.58  | 1.13 | -0.53 | 2800.00 | 3.07  | 0.04 |
| 0.91  | -0.41 | 1054.00 | 2.56  | 0.15 | -0.07 | 2672.00 | 4.98  | 1.87 |
| 1.43  | -0.64 | 1416.00 | 1.77  | 0.94 | -0.44 | 4110.00 | 3.50  | 0.39 |
| 1.11  | 0.50  | 2118.00 | 3.54  | 0.83 | 0.38  | 3776.00 | 6.25  | 3.14 |
| 2.20  | 0.99  | 1764.00 | 1.53  | 1.18 | -0.55 | 2791.00 | 4.62  | 1.51 |
| 11.92 | 5.38  | 1211.00 | 1.98  | 0.73 | -0.34 | 2266.00 | 4.55  | 1.44 |
| 4.07  | 1.84  | 1443.00 | 3.40  | 0.69 | 0.32  | 3568.00 | 5.30  | 2.19 |
| 0.53  | 0.24  | 447.00  | 2.46  | 0.25 | -0.12 | 1389.00 | 2.95  | 0.16 |
| 3.50  | 1.58  | 951.00  | 10.41 | 7.70 | 3.57  | 2439.00 | 4.96  | 1.85 |
| 1.59  | 0.72  | 910.00  | 3.85  | 1.14 | 0.53  | 2051.00 | 3.95  | 0.84 |
| 5.07  | 2.29  | 839.00  | 1.19  | 1.52 | -0.70 | 2214.00 | 2.30  | 0.81 |
| 1.17  | -0.53 | 642.00  | 3.89  | 1.18 | 0.55  | 1599.00 | 2.50  | 0.61 |
| 3.78  | 1.71  | 1466.00 | 7.23  | 4.52 | 2.09  | 3499.00 | 7.09  | 3.98 |
| 0.31  | 0.14  | 1485.00 | 2.15  | 0.56 | -0.26 | 2441.00 | 0.78  | 2.33 |
| 2.44  | 1.10  | 1602.00 | 1.81  | 0.90 | -0.42 | 3135.00 | 2.84  | 0.27 |
| 0.89  | -0.40 | 606.00  | 4.95  | 2.24 | 1.04  | 903.00  | 2.44  | 0.67 |
| 9.17  | 4.14  | 1092.00 | 4.49  | 1.78 | 0.82  | 2818.00 | 5.71  | 2.60 |
| 1.73  | 0.78  | 1296.00 | 2.16  | 0.55 | -0.26 | 2083.00 | 3.55  | 0.44 |
| 2.36  | 1.06  | 1483.00 | 3.44  | 0.73 | 0.34  | 3136.00 | 9.82  | 6.71 |
| 1.37  | -0.62 | 1619.00 | 2.29  | 0.42 | -0.20 | 2810.00 | 1.60  | 1.51 |

|       |         |         |       |         |       |         |      |       |
|-------|---------|---------|-------|---------|-------|---------|------|-------|
| 0.04  | 0.02    | 2472.00 | 1.09  | 1.62    | -0.75 | 3414.00 | 0.12 | 2.99  |
| 0.01  | 0.01    | 1982.00 | 4.89  | 2.18    | 1.01  | 4402.00 | 0.50 | 2.61  |
| 0.62  | -0.28   | 588.00  | 4.08  | 1.37    | 0.63  | 1584.00 | 0.44 | 2.67  |
| 0.36  | 0.16    | 1510.00 | 3.38  | 0.67    | 0.31  | 2365.00 | 1.78 | 1.33  |
| 0.58  | -0.26   | 1642.00 | 2.80  | 0.09    | 0.04  | 2482.00 | 0.56 | 2.55  |
| 1.11  | -0.50   | 733.00  | 0.95  | 1.76    | -0.81 | 1907.00 | 1.21 | 1.90  |
| 1.21  | 0.54    | 1307.00 | 1.68  | 1.03    | -0.48 | 3278.00 | 1.43 | 1.68  |
| 20.41 | 9.21    | 254.00  | 18.11 | 15.40   | 7.14  | 621.00  | 4.67 | 1.56  |
| 1.44  | -0.65   | 1111.00 | 3.60  | 0.89    | 0.41  | 1417.00 | 1.06 | 2.05  |
| 0.23  | 0.10    | 694.00  | 3.46  | 0.75    | 0.35  | 995.00  | 0.10 | 3.01  |
| 0.85  | -0.38   | 1366.00 | 3.15  | 0.44    | 0.20  | 2802.00 | 1.32 | 1.79  |
| 1.53  | -0.69   | 1106.00 | 1.18  | 1.53    | -0.71 | 2874.00 | 4.45 | 1.34  |
| 1.22  | -0.55   | 701.00  | 7.70  | 4.99    | 2.31  | 1952.00 | 0.87 | 2.24  |
| 1.26  | 0.57    | 1050.00 | 4.57  | 1.86    | 0.86  | 2001.00 | 2.45 | 0.66  |
| 2.07  | 0.94    | 1150.00 | 12.44 | 9.73    | 4.51  | 2896.00 | 4.49 | 1.38  |
| 1.17  | 0.53    | 1925.00 | 3.90  | 1.19    | 0.55  | 3519.00 | 2.56 | 0.55  |
| 2.65  | 1.20    | 405.00  | 4.69  | 1.98    | 0.92  | 1614.00 | 3.10 | 0.01  |
| 1.55  | -0.70   | 382.00  | 6.54  | 3.83    | 1.78  | 2183.00 | 4.90 | 1.79  |
| 2.03  | -0.92   | 1085.00 | 1.66  | 1.05    | -0.49 | 1227.00 | 3.10 | 0.01  |
| 2.40  | 1.08    | 750.00  | 7.73  | 5.02    | 2.33  | 1146.00 | 3.66 | 0.55  |
| 5.69  | 2.57    | 13.00   | 76.92 | 74.21   | 34.39 | 2101.00 | 4.57 | 1.46  |
| 0.93  | 0.42    | 1781.00 | 2.70  | 0.01    | -0.01 | 2816.00 | 0.11 | 3.00  |
| 6.65  | 3.00    | 308.00  | 18.51 | 15.80   | 7.32  | 934.00  | 0.75 | 2.36  |
| 3.09  | 1.39    | 317.00  | 7.57  | 4.86    | 2.25  | 1112.00 | 0.63 | 2.48  |
| 5.43  | 2.45    | 485.00  | 9.48  | 6.77    | 3.14  | 870.00  | 0.69 | 2.42  |
| 1.31  | 0.59    | 653.00  | 1.07  | 1.64    | -0.76 | 1749.00 | 0.34 | 2.77  |
| 2.33  | 1.05    | 992.00  | 3.43  | 0.72    | 0.33  | 2787.00 | 1.18 | 1.93  |
| 2.24  | 1.01    | 933.00  | 4.93  | 2.22    | 1.03  | 2024.00 | 1.43 | 1.68  |
| 3.34  | 1.51    | 731.00  | 2.87  | 0.16    | 0.07  | 2655.00 | 1.88 | 1.23  |
| 4.84  | 2.19    | 696.00  | 5.89  | 3.18    | 1.47  | 1709.00 | 4.10 | 0.99  |
| 5.31  | 2.40    | 939.00  | 4.69  | 1.98    | 0.91  | 3044.00 | 3.84 | 0.73  |
| 0.70  | 0.32    | 574.00  | 4.53  | 1.82    | 0.84  | 2698.00 | 1.89 | 1.22  |
| 1.23  | 0.56    | 789.00  | 5.70  | 2.99    | 1.39  | 3098.00 | 5.36 | 2.25  |
| 1.69  | -0.76   | 928.00  | 4.31  | 1.60    | 0.74  | 1943.00 | 0.57 | 2.54  |
| 0.37  | 0.17    | 956.00  | 2.41  | 0.30    | -0.14 | 1839.00 | 1.20 | 1.91  |
| 1.32  | 0.60    | 594.00  | 3.70  | 0.99    | 0.46  | 1518.00 | 0.33 | 2.78  |
| 1.49  | 0.67    | 346.00  | 6.36  | 3.65    | 1.69  | 1155.00 | 4.76 | 1.65  |
| 4.98  | 2.25    | 943.00  | 3.39  | 0.68    | 0.32  | 1793.00 | 2.29 | 0.82  |
| 0.40  | -0.18   | 287.00  | 11.15 | 8.44    | 3.91  | 355.00  | 3.66 | 0.55  |
| 1.62  | -0.73   | 743.00  | 2.56  | 0.15    | -0.07 | 715.00  | 5.17 | 2.06  |
| 1.50  |         | 1810.50 | 2.71  | 1.46    |       | 2212.00 | 3.11 | 1.77  |
| 4.49  |         |         |       | 4.37    |       |         |      | 5.30  |
| 2.22  |         |         |       | 2.16    |       |         |      | 2.62  |
|       | 3039.00 | 31.75   |       | 4468.00 | 35.54 |         |      |       |
|       | 4674.00 | 33.50   |       | 3452.00 | 27.93 |         |      |       |
|       |         |         |       | 2493.00 | 27.56 | 1789.00 |      | 9.67  |
|       |         |         |       | 2397.00 | 34.04 | 2740.00 |      | 19.78 |

|         |       |         |       |
|---------|-------|---------|-------|
| 3856.50 | 32.63 | 3202.50 | 31.27 |
| 1156.12 | 1.24  | 968.84  | 4.12  |
| 968.00  | 2.38  | 444.00  | 4.28  |
| 808.00  | 1.36  | 765.00  | 1.57  |
| 489.00  | 2.45  | 1108.00 | 4.24  |
| 1573.00 | 6.36  | 1788.00 | 1.23  |
| 959.50  | 3.14  | 1026.25 | 2.83  |
| 454.89  | 2.20  | 575.68  | 1.66  |
|         | 3.71  |         | 12.36 |
|         | 6.61  |         | 4.97  |
|         | 10.32 |         | 17.33 |
|         | 29.49 |         | 28.44 |
|         | 0.35  |         | 0.61  |
|         | 0.65  |         | 0.39  |
| 120.00  | 11.67 | 69.00   | 31.88 |
| 63.00   | 4.76  | 99.00   | 21.21 |
| 1390.00 | 2.01  | 1950.00 | 0.72  |
| 847.00  | 6.85  | 1639.00 | 0.85  |
| 4024.00 | 8.90  | 6979.00 | 11.25 |
| 5724.00 | 12.02 | 5171.00 | 12.26 |

rZ

-0.97  
-0.92  
0.12  
-1.04  
-0.47  
-0.18  
-0.41  
-0.37  
0.47  
-1.08  
-1.00  
-0.22  
-0.76  
-0.77  
-0.53  
1.61  
-0.42  
-0.01  
0.59  
0.49  
-1.07  
-0.90  
-0.31  
-0.86  
-1.00  
-0.81  
-0.40  
-0.20  
-0.86  
-0.71  
-0.30  
-0.24  
0.55  
1.22  
-0.49  
0.57  
-0.91  
-0.48  
0.43  
-0.50  
-0.62  
-0.28  
0.38  
0.32  
-0.49  
-0.59

-0.47

2.04 y

-0.05

-0.65

-0.14

0.59 y

-0.56

-0.89

1.23 y

-0.77

-0.30

-0.35

-0.60

-0.24

-0.47

0.99

-0.39

0.96

-0.27

-0.88

0.25

-0.10

-0.40

0.47

0.67

0.42

-0.80

-0.44

0.32

0.04

0.87

1.36

-0.58

-0.51

-0.88

-0.70

-0.55

-1.09

-0.89

-0.89

2.34

-1.11

-1.14

-1.11

-0.60

-0.94

-0.66

-0.95

-0.84

-0.97

-0.90

-1.01

-0.86

-0.35

-0.13

1.04

-0.03

4.24 y

2.51

-0.07

1.89

0.70

0.50

1.71

-0.56

0.47

0.93

3.41 y

0.86

0.73

-0.04

0.88

5.37 y

0.88

0.79

1.79

-0.61

4.71

0.70

2.02

0.23

2.35

0.79

2.48

0.06

1.11

0.96

1.95

1.26

1.47

-0.21

1.50 y

0.28

-0.66

0.30

1.39

0.44

-0.41

2.33

5.45

0.07

-0.24

0.15

-0.43

1.15

4.87

0.65

2.61 y

-0.42

0.11

-0.13

0.99

-0.78

0.78

-0.36

-0.93

-0.60

-0.94

0.11

0.90

-0.65

2.01

0.04

0.80

1.08

-0.45

1.99

1.15

2.20 y

7.36 y

0.01

0.41

6.98 y

1.83

-0.54

0.03

1.98

-0.76

-0.72

-0.63



-0.78

-0.75

1.78

-0.32

-0.36

0.58

0.08

-0.52

-0.51

-0.90

0.07

2.02 y

-0.94

-1.04

-0.06

0.44

0.87

0.55

1.33

0.25

0.18

0.96

-0.04

0.51

0.15

2.05

-0.86

0.42

1.21

0.07

0.53

1.04

0.10

0.92

-0.69

1.28

1.37

1.18

-0.29

-0.20

1.57

1.87

3.96 x

toxic b,c

2.61

2.09

2.84 x

debris a,b

0.38

1.01

0.28

1.04

2.48 y

0.71

0.61

-0.92

-0.03

0.16

1.32

0.47

0.33

-0.77

-0.58

0.59

-0.01

-0.08

0.17

-0.32

-0.78

0.46

2.32

3.61 y

-0.12

1.14 y

-0.12

1.10

-0.02

0.71

0.15

1.20

0.58

0.55

0.84

-0.06

0.71

0.32

-0.31

-0.23

1.52

-0.89

-0.10

-0.26

0.99

0.17

2.57

-0.58

-1.15  
-1.00  
-1.02  
-0.51  
-0.97  
-0.73  
-0.64  
0.60 x toxic a,b,c  
-0.79  
-1.15  
-0.69  
0.51  
-0.86  
-0.25  
0.53  
-0.21  
-0.01  
0.68  
-0.01  
0.21  
0.56 x toxic b  
-1.15  
-0.90 x toxic a,b,c  
-0.95  
-0.93 x toxic a,b,c  
-1.06  
-0.74  
-0.64  
-0.47  
0.38  
0.28  
-0.47  
0.86  
-0.97  
-0.73  
-1.06  
0.63  
-0.32  
0.21  
0.79

| Plate    | Well | Gene                                | GeneID             | Cell Count | % inf |
|----------|------|-------------------------------------|--------------------|------------|-------|
| 50049.00 | A02  | M-009620- polymerase (RNA) II (DI   | 5432.00 POLR2C     | 975.00     | 1.23  |
| 50049.00 | A04  | M-018612- polymerase (DNA direc     | 5427.00 POLE2      | 2055.00    | 9.73  |
| 50049.00 | A05  | M-012832- NADH dehydrogenase s      | 4541.00 ND6        | 1867.00    | 3.05  |
| 50049.00 | A06  | M-020131- polymerase (DNA direc     | 5425.00 POLD2      | 1913.00    | 0.99  |
| 50049.00 | A07  | M-017712- myosin IF                 | 4542.00 MYO1F      | 3694.00    | 2.33  |
| 50049.00 | A08  | M-010617- podocalyxin-like          | 5420.00 PODXL      | 5862.00    | 11.82 |
| 50049.00 | A09  | M-004019- mucin 1, cell surface as  | 4582.00 MUC1       | 3170.00    | 4.61  |
| 50049.00 | A10  | M-008737- pancreatic lipase-relate  | 5408.00 PNLIPRP2   | 2247.00    | 5.52  |
| 50049.00 | A11  | M-012643- mucin 2, oligomeric mu    | 4583.00 MUC2       | 3366.00    | 1.52  |
| 50049.00 | A12  | M-019924- exosome component 9       | 5393.00 EXOSC9     | 1615.00    | 0.93  |
| 50049.00 | A13  | M-004577- mucin 4, cell surface as  | 4585.00 MUC4       | 2546.00    | 3.69  |
| 50049.00 | A14  | M-010117- postmeiotic segregatio    | 5387.00 PMS2L3     | 2192.00    | 1.64  |
| 50049.00 | A15  | M-032252- mucin 5AC, oligomeric i   | 4586.00 MUC5AC     | 3374.00    | 3.20  |
| 50049.00 | A16  | M-017846- postmeiotic segregatio    | 5383.00 PMS2L5     | 2942.00    | 0.71  |
| 50049.00 | A17  | M-026763- mucin 5B, oligomeric m    | 4587.00 MUC5B      | 3225.00    | 3.50  |
| 50049.00 | A18  | M-012592- postmeiotic segregatio    | 5380.00 PMS2L2     | 1705.00    | 3.75  |
| 50049.00 | A19  | M-026728- mucin 6, oligomeric mu    | 4588.00 MUC6       | 2818.00    | 3.62  |
| 50049.00 | A20  | M-028956- postmeiotic segregatio    | 5379.00 PMS2L1     | 1357.00    | 6.93  |
| 50049.00 | A21  | M-015885- mucin 7, secreted         | 4589.00 MUC7       | 1774.00    | 4.57  |
| 50049.00 | A23  | M-019669- myosin binding protein    | 4604.00 MYBPC1     | 2264.00    | 11.48 |
| 50049.00 | B02  | M-032505- leucine rich repeat conl  | 474170.00 LRRC37A2 | 2743.00    | 2.15  |
| 50049.00 | B04  | M-032026- asthma-associated alte    | 404744.00 AAA1     | 1974.00    | 1.72  |
| 50049.00 | B05  | M-004739- polymerase (RNA) II (DI   | 5434.00 POLR2E     | 2172.00    | 0.55  |
| 50049.00 | B06  | M-014490- adrenomedullin 2          | 79924.00 ADM2      | 2925.00    | 2.50  |
| 50049.00 | B07  | M-004723- polymerase (RNA) II (DI   | 5435.00 POLR2F     | 1410.00    | 1.63  |
| 50049.00 | B08  | M-005907- kallikrein-related peptic | 5655.00 KLK10      | 4335.00    | 2.28  |
| 50049.00 | B09  | M-012247- polymerase (RNA) II (DI   | 5437.00 POLR2H     | 1695.00    | 0.71  |
| 50049.00 | B10  | M-005917- kallikrein-related peptic | 5653.00 KLK6       | 2243.00    | 1.74  |
| 50049.00 | B11  | M-012248- polymerase (RNA) II (DI   | 5438.00 POLR2I     | 1342.00    | 2.38  |
| 50049.00 | B12  | M-003696- protease, serine, 8       | 5652.00 PRSS8      | 1648.00    | 3.16  |
| 50049.00 | B13  | M-012249- polymerase (RNA) II (DI   | 5439.00 POLR2J     | 1057.00    | 0.76  |
| 50049.00 | B14  | M-005918- kallikrein-related peptic | 5650.00 KLK7       | 2994.00    | 4.14  |
| 50049.00 | B15  | M-011979- polymerase (RNA) II (DI   | 5440.00 POLR2K     | 2382.00    | 3.53  |
| 50049.00 | B16  | M-005937- mannan-binding lectin :   | 5648.00 MASP1      | 2537.00    | 1.89  |
| 50049.00 | B17  | M-013133- polymerase (RNA) II (DI   | 5441.00 POLR2L     | 1441.00    | 0.42  |
| 50049.00 | B18  | M-006015- protease, serine, 3 (me   | 5646.00 PRSS3      | 2726.00    | 5.72  |
| 50049.00 | B19  | M-012004- polymerase (RNA) mito     | 5442.00 POLRMT     | 2252.00    | 0.67  |
| 50049.00 | B20  | M-010333- proline rich Gla (G-carb  | 5639.00 PRRG2      | 809.00     | 1.24  |
| 50049.00 | B21  | M-004979- peptidylprolyl isomeraz   | 5478.00 PPIA       | 1640.00    | 1.04  |
| 50049.00 | B23  | M-004606- peptidylprolyl isomeraz   | 5479.00 PPIB       | 2102.00    | 0.95  |
| 50049.00 | C02  | M-011755- phosphomannomutase        | 5372.00 PMM1       | 1831.00    | 0.93  |
| 50049.00 | C04  | M-014745- pro-melanin-concentra     | 5370.00 PMCHL2     | 4856.00    | 1.96  |
| 50049.00 | C05  | M-019814- myosin binding protein    | 4606.00 MYBPC2     | 4638.00    | 2.07  |
| 50049.00 | C06  | M-017145- pro-melanin-concentra     | 5369.00 PMCHL1     | 4172.00    | 1.82  |
| 50049.00 | C07  | M-019896- myosin binding protein    | 4608.00 MYBPH      | 3561.00    | 5.70  |
| 50049.00 | C08  | M-013922- prepronociceptin          | 5368.00 PNOC       | 4108.00    | 2.70  |

|          |     |                                     |                   |         |       |
|----------|-----|-------------------------------------|-------------------|---------|-------|
| 50049.00 | C09 | M-023017- myosin, heavy chain 10    | 4628.00 MYH10     | 3910.00 | 2.99  |
| 50049.00 | C10 | M-021532- plexin A2                 | 5362.00 PLXNA2    | 4000.00 | 2.25  |
| 50049.00 | C11 | M-013075- myosin, light chain 1, al | 4632.00 MYL1      | 3148.00 | 2.16  |
| 50049.00 | C12 | M-011978- plastin 3 (T isoform)     | 5358.00 PLS3      | 2867.00 | 1.85  |
| 50049.00 | C13 | M-008765- myosin IA                 | 4640.00 MYO1A     | 2156.00 | 0.70  |
| 50049.00 | C14 | M-011356- plastin 1 (I isoform)     | 5357.00 PLS1      | 3005.00 | 0.97  |
| 50049.00 | C15 | M-015121- myosin IC                 | 4641.00 MYO1C     | 3263.00 | 4.87  |
| 50049.00 | C16 | M-019592- proteolipid protein 2 (c  | 5355.00 PLP2      | 3585.00 | 1.09  |
| 50049.00 | C17 | M-023316- myosin ID                 | 4642.00 MYO1D     | 4332.00 | 2.19  |
| 50049.00 | C18 | M-004285- procollagen-lysine, 2-o)  | 5352.00 PLOD2     | 2678.00 | 2.50  |
| 50049.00 | C19 | M-019919- myosin IE                 | 4643.00 MYO1E     | 2344.00 | 7.59  |
| 50049.00 | C20 | M-003669- FXVD domain containin     | 5349.00 FXVD3     | 2059.00 | 1.89  |
| 50049.00 | C21 | M-023431- myosin VB                 | 4645.00 MYO5B     | 3113.00 | 4.27  |
| 50049.00 | C23 | M-022928- myosin VIIIB              | 4648.00 MYO7B     | 2199.00 | 0.82  |
| 50049.00 | D02 | M-010332- proline rich Gla (G-carb  | 5638.00 PRRG1     | 2820.00 | 2.70  |
| 50049.00 | D04 | M-012253- peripherin                | 5630.00 PRPH      | 2548.00 | 4.79  |
| 50049.00 | D05 | M-008819- peptidylprolyl isomeras   | 5480.00 PPIC      | 3406.00 | 3.20  |
| 50049.00 | D06 | M-019697- protamine 2               | 5620.00 PRM2      | 4038.00 | 2.92  |
| 50049.00 | D07 | M-017840- periplakin                | 5493.00 PPL       | 4408.00 | 1.93  |
| 50049.00 | D08 | M-019696- protamine 1               | 5619.00 PRM1      | 2505.00 | 1.68  |
| 50049.00 | D09 | M-019691- pancreatic polypeptide    | 5539.00 PPY       | 2533.00 | 2.17  |
| 50049.00 | D10 | M-031716- agrin                     | 375790.00 AGRN    | 2170.00 | 0.41  |
| 50049.00 | D11 | M-003693- proline/arginine-rich er  | 5549.00 PRELP     | 1742.00 | 1.15  |
| 50049.00 | D12 | M-019389- putative binding proteii  | 346389.00 7A5     | 3573.00 | 2.41  |
| 50049.00 | D13 | M-006006- prolyl endopeptidase      | 5550.00 PREP      | 1570.00 | 1.72  |
| 50049.00 | D14 | M-029709- aldo-keto reductase far   | 340811.00 AKR1CL1 | 2922.00 | 0.21  |
| 50049.00 | D15 | M-017949- proteoglycan 2, bone r    | 5553.00 PRG2      | 2486.00 | 7.16  |
| 50049.00 | D16 | M-007303- ATP-binding cassette, s   | 340273.00 ABCB5   | 3108.00 | 1.29  |
| 50049.00 | D17 | M-012738- proline-rich protein Ha   | 5554.00 PRH1      | 3465.00 | 1.70  |
| 50049.00 | D18 | M-028638- alcohol dehydrogenase     | 285802.00 ADH5P4  | 2896.00 | 4.11  |
| 50049.00 | D19 | M-005081- proline-rich protein Ha   | 5555.00 PRH2      | 4709.00 | 7.79  |
| 50049.00 | D20 | M-005242- abhydrolase domain co     | 253152.00 ABHD7   | 4321.00 | 3.40  |
| 50049.00 | D21 | M-009940- ATP-binding cassette, s   | 5826.00 ABCD4     | 4991.00 | 1.44  |
| 50049.00 | D23 | M-008702- ATP-binding cassette, s   | 6059.00 ABCE1     | 1685.00 | 1.19  |
| 50049.00 | E02 | M-019595- perilipin                 | 5346.00 PLIN      | 3293.00 | 1.88  |
| 50049.00 | E04 | M-015748- plasminogen-like B2       | 5342.00 PLGLB2    | 2365.00 | 7.86  |
| 50049.00 | E05 | M-006539- myosin IXA                | 4649.00 MYO9A     | 1637.00 | 7.27  |
| 50049.00 | E06 | M-005064- phospholipase D2          | 5338.00 PLD2      | 3148.00 | 3.34  |
| 50049.00 | E07 | M-015359- NGFI-A binding protein    | 4664.00 NAB1      | 1867.00 | 3.70  |
| 50049.00 | E08 | M-009866- phospholipase C-like 1    | 5334.00 PLCL1     | 2669.00 | 3.00  |
| 50049.00 | E09 | M-027161- nascent polypeptide-as    | 4666.00 NACA      | 2468.00 | 6.44  |
| 50049.00 | E10 | M-004904- prolactin-induced prote   | 5304.00 PIP       | 2269.00 | 3.35  |
| 50049.00 | E11 | M-013452- heterogeneous nuclear     | 4670.00 HNRPM     | 3433.00 | 9.50  |
| 50049.00 | E12 | M-020128- protein (peptidylprolyl   | 5303.00 PIN4      | 2070.00 | 14.64 |
| 50049.00 | E13 | M-017274- nucleosome assembly p     | 4673.00 NAP1L1    | 1334.00 | 3.52  |
| 50049.00 | E14 | M-011885- phosphatidylinositol gly  | 5283.00 PIGH      | 2794.00 | 3.08  |
| 50049.00 | E15 | M-012182- nucleosome assembly p     | 4674.00 NAP1L2    | 1280.00 | 2.66  |

|          |     |                                     |           |           |         |       |
|----------|-----|-------------------------------------|-----------|-----------|---------|-------|
| 50049.00 | E16 | M-011753- phosphatidylinositol gly  | 5281.00   | PIGF      | 2344.00 | 4.61  |
| 50049.00 | E17 | M-011879- nucleosome assembly f     | 4675.00   | NAP1L3    | 3638.00 | 5.06  |
| 50049.00 | E18 | M-017555- phosphatidylinositol gly  | 5279.00   | PIGC      | 2202.00 | 2.18  |
| 50049.00 | E19 | M-012183- nucleosome assembly f     | 4676.00   | NAP1L4    | 3832.00 | 5.09  |
| 50049.00 | E20 | M-019923- serpin peptidase inhibit  | 5273.00   | SERPINB10 | 2493.00 | 1.20  |
| 50049.00 | E21 | M-011880- asparaginyI-tRNA synth    | 4677.00   | NARS      | 1824.00 | 3.67  |
| 50049.00 | E23 | M-011740- nuclear autoantigenic s   | 4678.00   | NASP      | 2693.00 | 2.75  |
| 50049.00 | F02 | M-006800- adenylate cyclase 4       | 196883.00 | ADCY4     | 2550.00 | 1.10  |
| 50049.00 | F04 | M-016481- chromosome 3 open re      | 165679.00 | C3orf57   | 2626.00 | 6.32  |
| 50049.00 | F05 | M-004053- acyl-Coenzyme A oxida     | 8310.00   | ACOX3     | 3100.00 | 2.68  |
| 50049.00 | F06 | M-009032- ATP-binding cassette, s   | 154664.00 | ABCA13    | 2252.00 | 2.53  |
| 50049.00 | F07 | M-005757- ADAM metallopeptidas      | 8728.00   | ADAM19    | 3964.00 | 2.60  |
| 50049.00 | F08 | M-018538- amyotrophic lateral scl   | 150864.00 | ALS2CR13  | 3204.00 | 0.66  |
| 50049.00 | F09 | M-010702- ADAM metallopeptidas      | 8756.00   | ADAM7     | 2445.00 | 3.44  |
| 50049.00 | F10 | M-007311- ATP-binding cassette, s   | 150000.00 | ABCC13    | 3117.00 | 3.88  |
| 50049.00 | F11 | M-006107- amiloride-sensitive cati  | 9311.00   | ACCN3     | 2454.00 | 3.22  |
| 50049.00 | F12 | M-015326- actin-related protein T1  | 139741.00 | ACTRT1    | 1275.00 | 6.67  |
| 50049.00 | F13 | M-011938- adiponectin, C1Q and c    | 9370.00   | ADIPOQ    | 3216.00 | 3.48  |
| 50049.00 | F14 | M-008453- alcohol dehydrogenase     | 137872.00 | ADHFE1    | 3387.00 | 7.65  |
| 50049.00 | F15 | M-008615- ATP-binding cassette, s   | 9619.00   | ABCG1     | 2644.00 | 2.19  |
| 50049.00 | F16 | M-024889- aminoacylase 1-like 2     | 135293.00 | ACY1L2    | 4367.00 | 1.83  |
| 50049.00 | F17 | M-007304- ATP-binding cassette, s   | 10058.00  | ABCB6     | 3003.00 | 3.30  |
| 50049.00 | F18 | M-008942- AHA1, activator of heat   | 130872.00 | AHSA2     | 5283.00 | 4.85  |
| 50049.00 | F19 | M-009286- ATP-binding cassette, s   | 10061.00  | ABCF2     | 3277.00 | 11.66 |
| 50049.00 | F20 | M-016849- islet cell autoantigen 1, | 130026.00 | ICA1L     | 3648.00 | 11.49 |
| 50049.00 | F21 | M-012706- furry homolog (Drosopl    | 10129.00  | FRY       | 4842.00 | 11.90 |
| 50049.00 | F23 | M-007313- ATP-binding cassette, s   | 10257.00  | ABCC4     | 2318.00 | 3.45  |
| 50049.00 | G02 | M-019439- serpin peptidase inhibit  | 5271.00   | SERPINB8  | 2395.00 | 0.50  |
| 50049.00 | G04 | M-019066- peptidase inhibitor 3, sl | 5266.00   | PI3       | 1409.00 | 2.70  |
| 50049.00 | G05 | M-015306- carcinoembryonic antig    | 4680.00   | CEACAM6   | 1953.00 | 0.67  |
| 50049.00 | G06 | M-007484- solute carrier family 25  | 5250.00   | SLC25A3   | 1828.00 | 1.70  |
| 50049.00 | G07 | M-011128- neutrophil cytosolic fac  | 4689.00   | NCF4      | 2114.00 | 1.23  |
| 50049.00 | G08 | M-008537- phosphoglucomutase 5      | 5239.00   | PGM5      | 2025.00 | 1.19  |
| 50049.00 | G09 | M-003854- nucleolin                 | 4691.00   | NCL       | 2055.00 | 3.31  |
| 50049.00 | G10 | M-013912- phosphoglucomutase 3      | 5238.00   | PGM3      | 3116.00 | 1.54  |
| 50049.00 | G11 | M-011881- NADH dehydrogenase (      | 4694.00   | NDUFA1    | 952.00  | 1.05  |
| 50049.00 | G12 | M-010925- phosphoglucomutase 1      | 5236.00   | PGM1      | 3329.00 | 1.89  |
| 50049.00 | G13 | M-018869- NADH dehydrogenase (      | 4695.00   | NDUFA2    | 1974.00 | 1.06  |
| 50049.00 | G14 | M-008371- phosphogluconate deh      | 5226.00   | PGD       | 2919.00 | 6.34  |
| 50049.00 | G15 | M-012674- NADH dehydrogenase (      | 4696.00   | NDUFA3    | 2228.00 | 3.46  |
| 50049.00 | G16 | M-005992- progastricsin (pepsinog   | 5225.00   | PGC       | 2704.00 | 3.66  |
| 50049.00 | G17 | M-019200- NADH dehydrogenase (      | 4697.00   | NDUFA4    | 3097.00 | 2.94  |
| 50049.00 | G18 | M-005991- pepsinogen 5, group I (j  | 5222.00   | PGA5      | 2967.00 | 2.09  |
| 50049.00 | G19 | M-012000- NADH dehydrogenase (      | 4698.00   | NDUFA5    | 2045.00 | 3.42  |
| 50049.00 | G20 | M-015740- vitrin                    | 5212.00   | VIT       | 3486.00 | 9.55  |
| 50049.00 | G21 | M-015716- NADH dehydrogenase (      | 4700.00   | NDUFA6    | 1579.00 | 0.57  |
| 50049.00 | G23 | M-012693- NADH dehydrogenase (      | 4701.00   | NDUFA7    | 1788.00 | 1.40  |

|          |            |                                          |                 |               |                |              |
|----------|------------|------------------------------------------|-----------------|---------------|----------------|--------------|
| 50049.00 | H02        | M-008523- aminocarboxymuconat            | 130013.00       | ACMSD         | 2710.00        | 0.18         |
| 50049.00 | H04        | M-009105- adenylosuccinate synth         | 122622.00       | ADSSL1        | 3301.00        | 2.58         |
| 50049.00 | H05        | M-009343- ATP-binding cassette, s        | 10347.00        | ABCA7         | 3126.00        | 0.61         |
| 50049.00 | H06        | M-016409- AE binding protein 2           | 121536.00       | AEBP2         | 2064.00        | 0.92         |
| 50049.00 | H07        | M-008536- ATP-binding cassette, s        | 10349.00        | ABCA10        | 3671.00        | 2.37         |
| 50049.00 | H08        | M-007310- ATP-binding cassette, s        | 94160.00        | ABCC12        | 2591.00        | 0.81         |
| 50049.00 | H09        | M-008534- ATP-binding cassette, s        | 10350.00        | ABCA9         | 2180.00        | 1.65         |
| 50049.00 | H10        | M-016441- ARP8 actin-related prot        | 93973.00        | ACTR8         | 1289.00        | 0.16         |
| 50049.00 | H11        | M-008347- ATP-binding cassette, s        | 10351.00        | ABCA8         | 2186.00        | 0.18         |
| 50049.00 | H12        | M-007110- acidic repeat containi         | 93953.00        | ACRC          | 847.00         | 0.94         |
| 50049.00 | H13        | M-003626- anterior gradient homo         | 10551.00        | AGR2          | 1308.00        | 0.76         |
| 50049.00 | H14        | M-010400- aspartoacylase (aminoc         | 91703.00        | ACY3          | 2457.00        | 0.28         |
| 50049.00 | H15        | M-005781- AFG3 ATPase family gei         | 10939.00        | AFG3L2        | 1395.00        | 2.65         |
| 50049.00 | H16        | M-016183- acyl-Coenzyme A bindir         | 91452.00        | ACBD5         | 1999.00        | 1.30         |
| 50049.00 | H17        | M-012340- adhesion regulating mc         | 11047.00        | ADRM1         | 2753.00        | 1.34         |
| 50049.00 | <b>H18</b> | <b>M-021497- three prime histone mF</b>  | <b>90459.00</b> | <b>THEX1</b>  | <b>3256.00</b> | <b>8.72</b>  |
| 50049.00 | H19        | M-007306- ATP-binding cassette, s        | 11194.00        | ABCB8         | 2353.00        | 1.49         |
| 50049.00 | H20        | M-027140- asparagine-linked glyco        | 85365.00        | ALG2          | 2907.00        | 0.48         |
| 50049.00 | <b>H21</b> | <b>M-013395- ataxin 2-like</b>           | <b>11273.00</b> | <b>ATXN2L</b> | <b>3131.00</b> | <b>9.36</b>  |
| 50049.00 | H23        | M-020382- actin binding LIM prote        | 22885.00        | ABLIM3        | 593.00         | 0.67         |
| 50049.00 | I02        | M-009015- phosphoribosylformylg          | 5198.00         | PFAS          | 3692.00        | 2.76         |
| 50049.00 | I04        | M-008059- platelet factor 4 variant      | 5197.00         | PF4V1         | 1728.00        | 3.18         |
| 50049.00 | I05        | M-012496- NADH dehydrogenase (           | 4702.00         | NDUFA8        | 2075.00        | 3.13         |
| 50049.00 | I06        | M-006544- paternally expressed 3         | 5178.00         | PEG3          | 2346.00        | 3.37         |
| 50049.00 | I07        | M-016044- NADH dehydrogenase (           | 4704.00         | NDUFA9        | 3157.00        | 5.26         |
| 50049.00 | <b>I08</b> | <b>M-019151- prodynorphin</b>            | <b>5173.00</b>  | <b>PDYN</b>   | <b>2989.00</b> | <b>7.86</b>  |
| 50049.00 | I09        | M-006752- NADH dehydrogenase (           | 4705.00         | NDUFA10       | 3104.00        | 3.32         |
| 50049.00 | I10        | M-008642- phosphate cytidyltran          | 5130.00         | PCYT1A        | 1449.00        | 9.32         |
| 50049.00 | I11        | M-019897- NADH dehydrogenase (           | 4706.00         | NDUFAB1       | 1548.00        | 1.87         |
| 50049.00 | I12        | M-005986- proprotein convertase :        | 5126.00         | PCSK2         | 1660.00        | 4.16         |
| 50049.00 | I13        | M-017848- NADH dehydrogenase (           | 4707.00         | NDUFB1        | 645.00         | 7.75         |
| 50049.00 | <b>I14</b> | <b>M-005987- proprotein convertase :</b> | <b>5125.00</b>  | <b>PCSK5</b>  | <b>2704.00</b> | <b>12.69</b> |
| 50049.00 | I15        | M-019202- NADH dehydrogenase (           | 4708.00         | NDUFB2        | 2589.00        | 3.79         |
| 50049.00 | I16        | M-020122- Purkinje cell protein 4        | 5121.00         | PCP4          | 1109.00        | 1.80         |
| 50049.00 | I17        | M-019604- NADH dehydrogenase (           | 4709.00         | NDUFB3        | 1601.00        | 3.62         |
| 50049.00 | I18        | M-012172- pericentrin (kendrin)          | 5116.00         | PCNT          | 1466.00        | 4.02         |
| 50049.00 | I19        | M-019209- NADH dehydrogenase (           | 4711.00         | NDUFB5        | 2427.00        | 3.26         |
| 50049.00 | I20        | M-010000- protein-L-isoaspartate (       | 5110.00         | PCMT1         | 3480.00        | 3.10         |
| 50049.00 | I21        | M-017210- NADH dehydrogenase (           | 4712.00         | NDUFB6        | 1917.00        | 3.60         |
| 50049.00 | I23        | M-017213- NADH dehydrogenase (           | 4713.00         | NDUFB7        | 1034.00        | 2.03         |
| 50049.00 | J02        | M-015856- synapse defective 1, Rh        | 85360.00        | SYDE1         | 2221.00        | 3.83         |
| 50049.00 | <b>J04</b> | <b>M-027138- asparagine-linked glyco</b> | <b>84920.00</b> | <b>ALG10</b>  | <b>3833.00</b> | <b>16.05</b> |
| 50049.00 | J05        | M-014059- ATP/GTP binding protei         | 23287.00        | AGTPBP1       | 3788.00        | 3.93         |
| 50049.00 | J06        | M-013589- abhydrolase domain co          | 84696.00        | ABHD1         | 2566.00        | 1.71         |
| 50049.00 | J07        | M-007748- acyl-CoA synthetase lor        | 23305.00        | ACSL6         | 2000.00        | 7.40         |
| 50049.00 | J08        | M-008549- acyl-CoA synthetase sh         | 84532.00        | ACSS1         | 1851.00        | 1.78         |
| 50049.00 | J09        | M-012857- activity-dependent neu         | 23394.00        | ADNP          | 3343.00        | 2.60         |

|          |            |                                          |                 |               |                |              |
|----------|------------|------------------------------------------|-----------------|---------------|----------------|--------------|
| 50049.00 | J10        | M-013575- acrosin binding protein        | 84519.00        | ACRBP         | 1380.00        | 2.03         |
| 50049.00 | J11        | M-007300- ATP-binding cassette, s        | 23456.00        | ABCB10        | 1648.00        | 0.85         |
| 50049.00 | <b>J12</b> | <b>M-014892- actin binding LIM prote</b> | <b>84448.00</b> | <b>ABLIM2</b> | <b>1538.00</b> | <b>15.74</b> |
| 50049.00 | J13        | M-007307- ATP-binding cassette, s        | 23457.00        | ABCB9         | 2798.00        | 5.15         |
| 50049.00 | J14        | M-014886- AKT1 substrate 1 (proli        | 84335.00        | AKT1S1        | 2116.00        | 0.95         |
| 50049.00 | J15        | M-008535- ATP-binding cassette, s        | 23460.00        | ABCA6         | 2238.00        | 3.57         |
| 50049.00 | J16        | M-008231- acyl-Coenzyme A bindir         | 84320.00        | ACBD6         | 2088.00        | 4.41         |
| 50049.00 | J17        | M-004345- ATP-binding cassette, s        | 23461.00        | ABCA5         | 1955.00        | 1.43         |
| 50049.00 | J18        | M-017159- leucine rich repeat cont       | 84230.00        | LRRC8C        | 2974.00        | 3.46         |
| 50049.00 | J19        | M-009346- adenosine deaminase, i         | 23536.00        | ADAT1         | 3189.00        | 4.55         |
| 50049.00 | <b>J20</b> | <b>M-014825- neuroblastoma breakp</b>    | <b>84224.00</b> | <b>NBPF3</b>  | <b>4081.00</b> | <b>10.32</b> |
| 50049.00 | J21        | M-010044- acyl-CoA thioesterase 9        | 23597.00        | ACOT9         | 1714.00        | 4.61         |
| 50049.00 | J23        | M-016671- ankyrin repeat and BTB         | 25841.00        | ABTB2         | 2240.00        | 1.65         |
| 50049.00 | K02        | M-012243- poly(rC) binding proteir       | 5093.00         | PCBP1         | 3045.00        | 4.93         |
| 50049.00 | K04        | M-011348- poly(A)-specific ribonuc       | 5073.00         | PARN          | 2916.00        | 0.69         |
| 50049.00 | K05        | M-019898- NADH dehydrogenase (           | 4714.00         | NDUFB8        | 1936.00        | 1.70         |
| 50049.00 | K06        | M-007857- contactin 3 (plasmacyt         | 5067.00         | CNTN3         | 2462.00        | 0.93         |
| 50049.00 | K07        | M-019899- NADH dehydrogenase (           | 4715.00         | NDUFB9        | 2798.00        | 4.22         |
| 50049.00 | K08        | M-008424- peptidylglycine alpha-a        | 5066.00         | PAM           | 2470.00        | 5.26         |
| 50049.00 | K09        | M-012675- NADH dehydrogenase (           | 4716.00         | NDUFB10       | 1716.00        | 0.82         |
| 50049.00 | K10        | M-019597- paralemmi                      | 5064.00         | PALM          | 2257.00        | 1.73         |
| 50049.00 | K11        | M-019601- NADH dehydrogenase (           | 4717.00         | NDUFC1        | 903.00         | 0.89         |
| 50049.00 | K12        | M-010027- progestagen-associatec         | 5047.00         | PAEP          | 1219.00        | 0.41         |
| 50049.00 | K13        | M-015319- NADH dehydrogenase (           | 4718.00         | NDUFC2        | 1276.00        | 2.19         |
| 50049.00 | K14        | M-014691- poly(A) binding protein        | 5042.00         | PABPC3        | 1552.00        | 1.80         |
| 50049.00 | K15        | M-019815- NADH dehydrogenase (           | 4722.00         | NDUFS3        | 634.00         | 1.10         |
| 50049.00 | K16        | M-012696- oxidase (cytochrome c)         | 5018.00         | OXA1L         | 772.00         | 0.91         |
| 50049.00 | K17        | M-016266- NADH dehydrogenase (           | 4723.00         | NDUFV1        | 1895.00        | 1.37         |
| 50049.00 | K18        | M-006543- ovo-like 1(Drosophila)         | 5017.00         | OVOL1         | 2509.00        | 1.91         |
| 50049.00 | K19        | M-019817- NADH dehydrogenase (           | 4726.00         | NDUFS6        | 1619.00        | 0.93         |
| 50049.00 | K20        | M-017839- oviductal glycoprotein :       | 5016.00         | OVGP1         | 2536.00        | 2.88         |
| 50049.00 | K21        | M-016362- NADH dehydrogenase (           | 4731.00         | NDUFV3        | 1899.00        | 1.37         |
| 50049.00 | K23        | M-013666- ribosomal protein L10a         | 4736.00         | RPL10A        | 815.00         | 0.61         |
| 50049.00 | L02        | M-013535- transmembrane proteir          | 83935.00        | TMEM133       | 1695.00        | 1.59         |
| 50049.00 | L04        | M-006809- ADP-dependent glucoki          | 83440.00        | ADPGK         | 2796.00        | 6.37         |
| 50049.00 | L05        | M-008407- ATP-binding cassette, s        | 26154.00        | ABCA12        | 3198.00        | 2.25         |
| 50049.00 | L06        | M-004525- ADAM metallopeptidas           | 80332.00        | ADAM33        | 1597.00        | 2.69         |
| 50049.00 | <b>L07</b> | <b>M-009258- A kinase (PRKA) anchor</b>  | <b>26993.00</b> | <b>AKAP8L</b> | <b>2962.00</b> | <b>9.66</b>  |
| 50049.00 | L08        | M-018395- ARP5 actin-related prot        | 79913.00        | ACTR5         | 2499.00        | 3.60         |
| 50049.00 | L09        | M-008501- acyl-Coenzyme A dehyd          | 27034.00        | ACAD8         | 2176.00        | 0.41         |
| 50049.00 | L10        | M-021341- agmatine ureohydrolas          | 79814.00        | AGMAT         | 3196.00        | 7.98         |
| 50049.00 | L11        | M-004893- kelch-like 20 (Drosophil       | 27252.00        | KLHL20        | 1360.00        | 1.99         |
| 50049.00 | L12        | M-014424- acyl-Coenzyme A bindir         | 79777.00        | ACBD4         | 1730.00        | 2.95         |
| 50049.00 | L13        | M-020221- neuronal thread proteii        | 27308.00        | RP5-886K2     | 1094.00        | 1.28         |
| 50049.00 | L14        | M-007801- adiponectin receptor 2         | 79602.00        | ADIPOR2       | 1848.00        | 0.70         |
| 50049.00 | L15        | M-009002- acyl-Coenzyme A dehyd          | 28976.00        | ACAD9         | 2183.00        | 2.57         |
| 50049.00 | L16        | M-027141- asparagine-linked glyco        | 79087.00        | ALG12         | 1703.00        | 2.06         |



|          |     |                                    |          |           |         |       |
|----------|-----|------------------------------------|----------|-----------|---------|-------|
| 50049.00 | L17 | M-008461- chromosome 9 open re     | 28989.00 | C9orf32   | 2058.00 | 3.50  |
| 50049.00 | L18 | M-027136- asparagine-linked glyco  | 79053.00 | ALG8      | 2984.00 | 3.62  |
| 50049.00 | L19 | M-016186- non-SMC condensin II c   | 29781.00 | NCAPH2    | 2332.00 | 2.06  |
| 50049.00 | L20 | M-009458- acetoacetyl-CoA synthe   | 65985.00 | AACS      | 1006.00 | 0.99  |
| 50049.00 | L21 | M-013393- asparagine-linked glyco  | 29880.00 | ALG5      | 3830.00 | 1.10  |
| 50049.00 | L23 | M-013576- apobec-1 complementa     | 29974.00 | ACF       | 3781.00 | 3.09  |
| 50049.00 | M02 | M-008732- orthodenticle homeobc    | 5015.00  | OTX2      | 2929.00 | 1.09  |
| 50049.00 | M04 | M-011124- orosomuroid 2            | 5005.00  | ORM2      | 2563.00 | 1.99  |
| 50049.00 | M05 | M-019466- neural precursor cell ex | 4739.00  | NEDD9     | 3410.00 | 2.32  |
| 50049.00 | M06 | M-008250- orosomuroid 1            | 5004.00  | ORM1      | 1794.00 | 1.39  |
| 50049.00 | M07 | M-019968- neurofilament, mediu     | 4741.00  | NEFM      | 2540.00 | 1.77  |
| 50049.00 | M08 | M-019642- solute carrier family 22 | 5003.00  | SLC22A18A | 882.00  | 2.38  |
| 50049.00 | M09 | M-012185- NEL-like 2 (chicken)     | 4753.00  | NELL2     | 1484.00 | 0.67  |
| 50049.00 | M10 | M-003287- origin recognition com   | 5001.00  | ORC5L     | 3497.00 | 3.57  |
| 50049.00 | M11 | M-012058- sialidase 2 (cytosolic s | 4759.00  | NEU2      | 1433.00 | 2.02  |
| 50049.00 | M12 | M-003286- origin recognition com   | 5000.00  | ORC4L     | 3795.00 | 2.71  |
| 50049.00 | M13 | M-008889- neurogenic differentiat  | 4761.00  | NEUROD2   | 2516.00 | 3.34  |
| 50049.00 | M14 | M-003284- origin recognition com   | 4999.00  | ORC2L     | 2411.00 | 1.62  |
| 50049.00 | M15 | M-009057- neurogenin 1             | 4762.00  | NEUROG1   | 891.00  | 0.79  |
| 50049.00 | M16 | M-003283- origin recognition com   | 4998.00  | ORC1L     | 2707.00 | 6.10  |
| 50049.00 | M17 | M-020020- nescient helix loop heli | 4808.00  | NHLH2     | 2631.00 | 0.72  |
| 50049.00 | M18 | M-012238- olfactory marker protei  | 4975.00  | OMP       | 1954.00 | 1.64  |
| 50049.00 | M19 | M-032018- Nance-Horan syndrome     | 4810.00  | NHS       | 3012.00 | 2.69  |
| 50049.00 | M20 | M-010106- oligodendrocyte myelir   | 4974.00  | OMG       | 4255.00 | 2.91  |
| 50049.00 | M21 | M-020844- ninjurin 2               | 4815.00  | NINJ2     | 3000.00 | 2.27  |
| 50049.00 | M23 | M-020022- nitrilase 1              | 4817.00  | NIT1      | 3387.00 | 0.97  |
| 50049.00 | N02 | M-014237- adrenocortical dysplasi  | 65057.00 | ACD       | 1034.00 | 1.26  |
| 50049.00 | N04 | M-009818- alanine-glyoxylate amir  | 64902.00 | AGXT2     | 1371.00 | 2.19  |
| 50049.00 | N05 | M-007800- adiponectin receptor 1   | 51094.00 | ADIPOR1   | 2006.00 | 0.55  |
| 50049.00 | N06 | M-008696- alanine-glyoxylate amir  | 64850.00 | AGXT2L1   | 2230.00 | 0.54  |
| 50049.00 | N07 | M-021057- alpha-1,4-N-acetylglucc  | 51146.00 | A4GNT     | 1969.00 | 1.22  |
| 50049.00 | N08 | M-010799- acyl-Coenzyme A bindir   | 64746.00 | ACBD3     | 1489.00 | 10.01 |
| 50049.00 | N09 | M-013159- amino adipate aminotra   | 51166.00 | AADAT     | 2859.00 | 2.20  |
| 50049.00 | N10 | M-009921- aldehyde dehydrogena     | 64577.00 | ALDH8A1   | 3740.00 | 2.46  |
| 50049.00 | N11 | M-013175- ABI gene family, memb    | 51225.00 | ABI3      | 2008.00 | 1.20  |
| 50049.00 | N12 | M-018058- ARP6 actin-related prot  | 64431.00 | ACTR6     | 1771.00 | 1.64  |
| 50049.00 | N13 | M-021162- CD320 molecule           | 51293.00 | CD320     | 1635.00 | 1.10  |
| 50049.00 | N14 | M-008919- ATP-binding cassette, s  | 64137.00 | ABCG4     | 1594.00 | 2.07  |
| 50049.00 | N15 | M-021120- androgen-induced 1       | 51390.00 | AIG1      | 1619.00 | 0.00  |
| 50049.00 | N16 | M-015921- HEAT repeat containing   | 63897.00 | HEATR6    | 3157.00 | 4.62  |
| 50049.00 | N17 | M-021376- NCK interacting protein  | 51517.00 | NCKIPSD   | 1355.00 | 2.14  |
| 50049.00 | N18 | M-008477- amino adipate-semialde   | 60496.00 | AASDHPPT  | 1393.00 | 0.65  |
| 50049.00 | N19 | M-006327- acyl-CoA synthetase lor  | 51703.00 | ACSL5     | 2029.00 | 1.28  |
| 50049.00 | N20 | M-013084- actin filament associate | 60312.00 | AFAP1     | 3672.00 | 3.19  |
| 50049.00 | N21 | M-009278- amiloride-sensitive cati | 51802.00 | ACCN5     | 2731.00 | 4.17  |
| 50049.00 | N23 | M-013377- ataxin 2-binding proteir | 54715.00 | A2BP1     | 2770.00 | 3.14  |
| 50049.00 | O02 | M-011974- osteoglycin              | 4969.00  | OGN       | 2709.00 | 2.73  |

|              |                                    |                   |         |       |
|--------------|------------------------------------|-------------------|---------|-------|
| 50049.00 O04 | M-019921- osteomodulin             | 4958.00 OMD       | 1636.00 | 0.43  |
| 50049.00 O05 | M-019118- neuronatin               | 4826.00 NNAT      | 1519.00 | 0.92  |
| 50049.00 O06 | M-017319- outer dense fiber of spr | 4957.00 ODF2      | 1837.00 | 1.31  |
| 50049.00 O07 | M-004316- N-myristoyltransferase   | 4836.00 NMT1      | 3193.00 | 2.32  |
| 50049.00 O08 | M-011346- outer dense fiber of spr | 4956.00 ODF1      | 1749.00 | 0.63  |
| 50049.00 O09 | M-017771- nodal homolog (mouse     | 4838.00 NODAL     | 1797.00 | 0.61  |
| 50049.00 O10 | M-012237- oncomodulin              | 4951.00 OCM       | 1307.00 | 2.07  |
| 50049.00 O11 | M-007756- non-POU domain conta     | 4841.00 NONO      | 1538.00 | 1.89  |
| 50049.00 O12 | M-024659- TBC1 domain family, m    | 4943.00 TBC1D25   | 843.00  | 1.78  |
| 50049.00 O13 | M-019599- nuclear protein, ataxia- | 4863.00 NPAT      | 875.00  | 4.23  |
| 50049.00 O14 | M-008391- nuclear VCP-like         | 4931.00 NVL       | 1593.00 | 2.39  |
| 50049.00 O15 | M-012736- natriuretic peptide prec | 4880.00 NPPC      | 1786.00 | 3.19  |
| 50049.00 O16 | M-017547- nucleoporin 88kDa        | 4927.00 NUP88     | 1622.00 | 3.88  |
| 50049.00 O17 | M-012647- neuronal pentraxin II    | 4885.00 NPTX2     | 1802.00 | 3.22  |
| 50049.00 O18 | M-009401- N-ethylmaleimide-sens    | 4905.00 NSF       | 2098.00 | 8.20  |
| 50049.00 O19 | M-012725- metallothionein 1B       | 4490.00 MT1B      | 2738.00 | 2.19  |
| 50049.00 O20 | M-005980- nardilysin (N-arginine d | 4898.00 NRD1      | 1712.00 | 4.97  |
| 50049.00 O21 | M-018337- metallothionein 1X       | 4501.00 MT1X      | 1443.00 | 3.60  |
| 50049.00 O23 | M-012726- metallothionein 1F       | 4494.00 MT1F      | 2495.00 | 18.84 |
| 50049.00 P02 | M-021280- nuclear fragile X menta  | 57532.00 NUFIP2   | 772.00  | 0.78  |
| 50049.00 P04 | M-025106- alanyl-tRNA synthetase   | 57505.00 AARS2    | 2063.00 | 0.68  |
| 50049.00 P05 | M-018723- Abelson helper integrat  | 54806.00 AH11     | 1023.00 | 1.27  |
| 50049.00 P06 | M-013872- AD026 protein            | 57413.00 AD026    | 2773.00 | 3.17  |
| 50049.00 P07 | M-017996- aftiphilin               | 54812.00 AFTPH    | 639.00  | 2.35  |
| 50049.00 P08 | M-017580- MIF4G domain containi    | 57409.00 MIF4GD   | 811.00  | 3.08  |
| 50049.00 P09 | M-021468- absent in melanoma 1-    | 55057.00 AIM1L    | 3218.00 | 3.42  |
| 50049.00 P10 | M-022416- ADAMTS-like 3            | 57188.00 ADAMTSL3 | 652.00  | 1.99  |
| 50049.00 P11 | M-008524- acyl-Coenzyme A oxida    | 55289.00 ACOXL    | 1012.00 | 2.57  |
| 50049.00 P12 | M-015673- cancer susceptibility ca | 57082.00 CASC5    | 348.00  | 2.87  |
| 50049.00 P13 | M-008641- ATP-binding cassette, s  | 55324.00 ABCF3    | 2332.00 | 2.36  |
| 50049.00 P14 | M-021398- ACN9 homolog (S. cere    | 57001.00 ACN9     | 313.00  | 5.11  |
| 50049.00 P15 | M-006108- amiloride-sensitive cati | 55515.00 ACCN4    | 1002.00 | 3.49  |
| 50049.00 P16 | M-010928- chromosome 1 open re     | 56900.00 C1orf119 | 905.00  | 2.76  |
| 50049.00 P17 | M-020523- allantoicase             | 55821.00 ALLC     | 1859.00 | 15.12 |
| 50049.00 P18 | M-009283- 1-acylglycerol-3-phospl  | 56895.00 AGPAT4   | 714.00  | 3.64  |
| 50049.00 P19 | M-013315- glycosyltransferase 8 d  | 55830.00 GLT8D1   | 762.00  | 4.59  |
| 50049.00 P20 | M-008620- 1-acylglycerol-3-phospl  | 56894.00 AGPAT3   | 1836.00 | 3.49  |
| 50049.00 P21 | M-020824- actin-related protein 1C | 55860.00 ACTR10   | 2183.00 | 8.47  |
| 50049.00 P23 | M-027147- asparagine-linked glyco  | 56052.00 ALG1     | 951.00  | 3.58  |
|              |                                    | mdn               | 2254.50 | 2.38  |
|              |                                    | 3MAD              |         |       |
|              |                                    | MADc              |         |       |
| 50049.00 C22 |                                    |                   | 2743.00 | 23.88 |
| 50049.00 D22 |                                    |                   | 4024.00 | 27.16 |
| 50049.00 E22 |                                    |                   | 2424.00 | 26.77 |
| 50049.00 F22 |                                    |                   | 3128.00 | 33.38 |
|              |                                    | mn                | 3079.75 | 27.80 |

|              |                                            |         |           |         |       |
|--------------|--------------------------------------------|---------|-----------|---------|-------|
|              |                                            |         | sd        | 692.18  | 4.00  |
| 50049.00 G22 |                                            |         |           | 1179.00 | 0.93  |
| 50049.00 H22 |                                            |         |           | 1117.00 | 0.27  |
| 50049.00 I22 |                                            |         |           | 1094.00 | 5.30  |
| 50049.00 J22 |                                            |         |           | 1839.00 | 1.63  |
|              |                                            |         | mn        | 1307.25 | 2.03  |
|              |                                            |         | sd        | 356.31  | 2.25  |
|              |                                            |         | 3psSD     |         | 11.99 |
|              |                                            |         | 3ngSD     |         | 6.75  |
|              |                                            |         | SumSD     |         | 18.74 |
|              |                                            |         | DiffMn    |         | 25.76 |
|              |                                            |         | SmovrDiff |         | 0.73  |
|              |                                            |         | 1minus    |         | 0.27  |
| 50049.00 G03 | M-003290- polo-like kinase 1 (Dros         | 5347.00 | PLK1 SMAR | 166.00  | 6.63  |
| 50049.00 H03 | M-003290- polo-like kinase 1 (Dros         | 5347.00 | PLK1 SMAR | 112.00  | 16.96 |
| 50049.00 I03 | D-001206-∴siControl non-targeting siRNA #2 |         |           | 1903.00 | 1.58  |
| 50049.00 J03 | D-001206-∴siControl non-targeting siRNA #2 |         |           | 1825.00 | 4.05  |
| 50049.00 K03 | D-001600-(siGLO RISC-free siRNA            |         |           | 5140.00 | 8.89  |
| 50049.00 L03 | D-001600-(siGLO RISC-free siRNA            |         |           | 4973.00 | 5.47  |

| Abs Dev     | rZ          | Cell Count     | % inf        | Abs Dev      | rZ          | Cell Count     | % inf        | Abs Dev      |
|-------------|-------------|----------------|--------------|--------------|-------------|----------------|--------------|--------------|
| 1.15        | -0.67       | 961.00         | 3.23         | 0.70         | 0.34        | 1088.00        | 4.04         | 1.88         |
| <b>7.35</b> | <b>4.25</b> | <b>1692.00</b> | <b>15.25</b> | <b>12.72</b> | <b>6.20</b> | <b>3024.00</b> | <b>12.93</b> | <b>10.77</b> |
| 0.67        | 0.39        | 1119.00        | 4.11         | 1.58         | 0.77        | 2245.00        | 2.27         | 0.11         |
| 1.39        | -0.80       | 1185.00        | 0.42         | 2.11         | -1.03       | 1663.00        | 2.04         | 0.12         |
| 0.05        | -0.03       | 1320.00        | 3.56         | 1.03         | 0.50        | 3948.00        | 2.66         | 0.50         |
| <b>9.44</b> | <b>5.46</b> | <b>2911.00</b> | <b>7.28</b>  | <b>4.75</b>  | <b>2.32</b> | <b>3929.00</b> | <b>6.46</b>  | <b>4.30</b>  |
| 2.23        | 1.29        | 1210.00        | 4.46         | 1.93         | 0.94        | 2462.00        | 2.40         | 0.24         |
| 3.14        | 1.81        | 1487.00        | 3.36         | 0.83         | 0.41        | 2458.00        | 2.44         | 0.28         |
| 0.86        | -0.50       | 1253.00        | 2.87         | 0.34         | 0.17        | 1854.00        | 1.40         | 0.76         |
| 1.45        | -0.84       | 786.00         | 4.96         | 2.43         | 1.19        | 1828.00        | 2.30         | 0.14         |
| 1.31        | 0.76        | 492.00         | 7.52         | <b>4.99</b>  | <b>2.43</b> | 1217.00        | 5.34         | 3.18         |
| 0.74        | -0.43       | 1406.00        | 2.35         | 0.18         | -0.09       | 2499.00        | 2.00         | 0.16         |
| 0.82        | 0.47        | 1412.00        | 4.89         | 2.36         | 1.15        | 4050.00        | 1.58         | 0.58         |
| 1.67        | -0.96       | 1592.00        | 2.58         | 0.05         | 0.02        | 3032.00        | 0.43         | 1.73         |
| 1.12        | 0.65        | 2369.00        | 7.22         | <b>4.69</b>  | <b>2.29</b> | 2764.00        | 5.39         | 3.23         |
| 1.37        | 0.79        | 630.00         | 4.60         | 2.07         | 1.01        | 1686.00        | 1.78         | 0.38         |
| 1.24        | 0.71        | 1572.00        | 2.67         | 0.14         | 0.07        | 3031.00        | 0.73         | 1.43         |
| <b>4.55</b> | <b>2.63</b> | 939.00         | 6.82         | <b>4.29</b>  | <b>2.09</b> | 1251.00        | 2.40         | 0.24         |
| 2.19        | 1.26        | 1004.00        | 4.78         | 2.25         | 1.10        | 1843.00        | 4.99         | 2.83         |
| <b>9.10</b> | <b>5.26</b> | <b>1359.00</b> | <b>5.00</b>  | <b>2.47</b>  | <b>1.21</b> | <b>1755.00</b> | <b>4.73</b>  | <b>2.57</b>  |
| 0.23        | -0.13       | 1867.00        | 3.75         | 1.22         | 0.60        | 2744.00        | 0.66         | 1.50         |
| 0.66        | -0.38       | 1351.00        | 3.33         | 0.80         | 0.39        | 2687.00        | 0.45         | 1.71         |
| 1.83        | -1.06       | 2023.00        | 1.14         | 1.39         | -0.68       | 2998.00        | 0.27         | 1.89         |
| 0.12        | 0.07        | 1840.00        | 4.24         | 1.71         | 0.83        | 4022.00        | 1.19         | 0.97         |
| 0.75        | -0.43       | 499.00         | 4.21         | 1.68         | 0.82        | 1830.00        | 0.33         | 1.83         |
| 0.10        | -0.06       | 1851.00        | 2.54         | 0.01         | 0.01        | 4387.00        | 0.36         | 1.80         |
| 1.67        | -0.97       | 729.00         | 6.31         | 3.78         | 1.84        | 2150.00        | 0.47         | 1.69         |
| 0.64        | -0.37       | 1225.00        | 3.76         | 1.23         | 0.60        | 2941.00        | 0.51         | 1.65         |
| 0.00        | 0.00        | 888.00         | 4.84         | 2.31         | 1.13        | 1758.00        | 1.59         | 0.57         |
| 0.78        | 0.45        | 1102.00        | 3.72         | 1.19         | 0.58        | 2185.00        | 1.42         | 0.74         |
| 1.62        | -0.94       | 911.00         | 3.62         | 1.09         | 0.53        | 1183.00        | 0.17         | 1.99         |
| 1.76        | 1.02        | 1537.00        | 4.03         | 1.50         | 0.73        | 2951.00        | 1.32         | 0.84         |
| 1.15        | 0.66        | 1378.00        | 3.70         | 1.17         | 0.57        | 3428.00        | 2.04         | 0.12         |
| 0.49        | -0.28       | 2036.00        | 2.55         | 0.02         | 0.01        | 3208.00        | 0.62         | 1.54         |
| 1.96        | -1.14       | 673.00         | 0.15         | 2.38         | -1.16       | 2371.00        | 1.05         | 1.11         |
| <b>3.34</b> | <b>1.93</b> | <b>1349.00</b> | <b>10.30</b> | <b>7.77</b>  | <b>3.79</b> | <b>2739.00</b> | <b>5.81</b>  | <b>3.65</b>  |
| 1.71        | -0.99       | 1174.00        | 0.43         | 2.10         | -1.02       | 2212.00        | 0.68         | 1.48         |
| 1.14        | -0.66       | 580.00         | 0.52         | 2.01         | -0.98       | 1424.00        | 0.14         | 2.02         |
| 1.34        | -0.78       | 1602.00        | 0.44         | 2.09         | -1.02       | 2321.00        | 1.08         | 1.08         |
| 1.43        | -0.83       | 2731.00        | 1.94         | 0.59         | -0.29       | 2631.00        | 2.24         | 0.08         |
| 1.45        | -0.84       | 1359.00        | 1.62         | 0.91         | -0.44       | 2059.00        | 1.70         | 0.46         |
| 0.42        | -0.25       | 3882.00        | 1.49         | 1.04         | -0.50       | 4922.00        | 1.93         | 0.23         |
| 0.31        | -0.18       | 3201.00        | 1.03         | 1.50         | -0.73       | 4390.00        | 2.87         | 0.71         |
| 0.56        | -0.32       | 1843.00        | 0.65         | 1.88         | -0.91       | 3180.00        | 1.67         | 0.49         |
| 3.32        | 1.92        | 1024.00        | 0.78         | 1.75         | -0.85       | 3861.00        | 6.16         | <b>4.00</b>  |
| 0.32        | 0.18        | 715.00         | 0.28         | 2.25         | -1.10       | 3210.00        | 1.90         | 0.26         |

|       |       |         |       |       |       |         |       |      |
|-------|-------|---------|-------|-------|-------|---------|-------|------|
| 0.61  | 0.35  | 1466.00 | 0.48  | 2.05  | -1.00 | 3920.00 | 1.79  | 0.37 |
| 0.13  | -0.08 | 1918.00 | 2.03  | 0.50  | -0.24 | 4320.00 | 2.80  | 0.64 |
| 0.22  | -0.13 | 14.00   | 7.14  | 4.61  | 2.25  | 4362.00 | 3.39  | 1.23 |
| 0.53  | -0.31 | 1549.00 | 1.48  | 1.05  | -0.51 | 2925.00 | 2.56  | 0.40 |
| 1.68  | -0.98 | 1608.00 | 2.30  | 0.23  | -0.11 | 2891.00 | 4.12  | 1.96 |
| 1.41  | -0.82 | 1760.00 | 0.23  | 2.30  | -1.12 | 4072.00 | 1.52  | 0.64 |
| 2.49  | 1.44  | 1256.00 | 0.48  | 2.05  | -1.00 | 2800.00 | 3.61  | 1.45 |
| 1.29  | -0.75 | 1592.00 | 1.07  | 1.46  | -0.71 | 2954.00 | 2.47  | 0.31 |
| 0.19  | -0.11 | 2466.00 | 1.05  | 1.48  | -0.72 | 4125.00 | 2.84  | 0.68 |
| 0.12  | 0.07  | 1313.00 | 2.21  | 0.32  | -0.16 | 1754.00 | 4.62  | 2.46 |
| 5.21  | 3.01  | 1789.00 | 1.57  | 0.96  | -0.47 | 2898.00 | 8.63  | 6.47 |
| 0.49  | -0.28 | 1290.00 | 0.39  | 2.14  | -1.04 | 3078.00 | 2.63  | 0.47 |
| 1.89  | 1.09  | 2751.00 | 5.71  | 3.18  | 1.55  | 3712.00 | 9.40  | 7.24 |
| 1.56  | -0.90 | 2369.00 | 0.13  | 2.40  | -1.17 | 2238.00 | 3.57  | 1.41 |
| 0.32  | 0.18  | 3030.00 | 1.91  | 0.62  | -0.30 | 3562.00 | 3.00  | 0.84 |
| 2.41  | 1.39  | 1765.00 | 1.42  | 1.11  | -0.54 | 2176.00 | 1.65  | 0.51 |
| 0.82  | 0.47  | 1877.00 | 0.53  | 2.00  | -0.97 | 3274.00 | 1.56  | 0.60 |
| 0.54  | 0.31  | 2258.00 | 0.84  | 1.69  | -0.82 | 4782.00 | 3.05  | 0.89 |
| 0.45  | -0.26 | 2062.00 | 0.73  | 1.80  | -0.88 | 4959.00 | 1.33  | 0.83 |
| 0.70  | -0.41 | 1329.00 | 0.68  | 1.85  | -0.90 | 3068.00 | 1.92  | 0.24 |
| 0.21  | -0.12 | 1645.00 | 1.16  | 1.38  | -0.67 | 2764.00 | 3.40  | 1.24 |
| 1.97  | -1.14 | 1269.00 | 0.71  | 1.82  | -0.89 | 1775.00 | 0.68  | 1.48 |
| 1.23  | -0.71 | 1003.00 | 0.60  | 1.93  | -0.94 | 1511.00 | 2.91  | 0.75 |
| 0.03  | 0.01  | 1786.00 | 1.90  | 0.63  | -0.30 | 3734.00 | 5.17  | 3.01 |
| 0.66  | -0.38 | 1603.00 | 2.00  | 0.53  | -0.26 | 1735.00 | 1.56  | 0.60 |
| 2.17  | -1.26 | 1453.00 | 1.24  | 1.29  | -0.63 | 3815.00 | 3.41  | 1.25 |
| 4.78  | 2.76  | 1456.00 | 3.85  | 1.32  | 0.64  | 2296.00 | 10.19 | 8.03 |
| 1.09  | -0.63 | 1985.00 | 0.71  | 1.82  | -0.89 | 3785.00 | 3.65  | 1.49 |
| 0.68  | -0.39 | 1311.00 | 0.92  | 1.61  | -0.79 | 3430.00 | 5.51  | 3.35 |
| 1.73  | 1.00  | 860.00  | 4.30  | 1.77  | 0.86  | 2045.00 | 6.21  | 4.05 |
| 5.41  | 3.13  | 3022.00 | 5.03  | 2.50  | 1.22  | 4384.00 | 7.32  | 5.16 |
| 1.02  | 0.59  | 2907.00 | 6.64  | 4.11  | 2.00  | 5328.00 | 6.02  | 3.86 |
| 0.94  | -0.54 | 2504.00 | 0.40  | 2.13  | -1.04 | 4134.00 | 4.72  | 2.56 |
| 1.19  | -0.69 | 1856.00 | 0.32  | 2.21  | -1.07 | 1729.00 | 2.20  | 0.04 |
| 0.50  | -0.29 | 2905.00 | 0.52  | 2.01  | -0.98 | 3783.00 | 0.24  | 1.92 |
| 5.48  | 3.17  | 1331.00 | 3.53  | 1.00  | 0.49  | 1953.00 | 3.79  | 1.63 |
| 4.89  | 2.82  | 1312.00 | 0.30  | 2.23  | -1.08 | 2226.00 | 0.81  | 1.35 |
| 0.96  | 0.55  | 1894.00 | 2.27  | 0.26  | -0.13 | 3671.00 | 2.10  | 0.06 |
| 1.32  | 0.76  | 947.00  | 2.53  | 0.00  | 0.00  | 1572.00 | 1.21  | 0.95 |
| 0.62  | 0.36  | 1430.00 | 1.96  | 0.57  | -0.28 | 3570.00 | 1.32  | 0.84 |
| 4.06  | 2.35  | 1183.00 | 1.69  | 0.84  | -0.41 | 2053.00 | 0.68  | 1.48 |
| 0.97  | 0.56  | 826.00  | 0.97  | 1.56  | -0.76 | 1962.00 | 1.02  | 1.14 |
| 7.12  | 4.11  | 1455.00 | 14.30 | 11.77 | 5.74  | 3925.00 | 10.12 | 7.96 |
| 12.26 | 7.08  | 1511.00 | 7.15  | 4.62  | 2.25  | 2203.00 | 4.40  | 2.24 |
| 1.14  | 0.66  | 1304.00 | 1.15  | 1.38  | -0.67 | 1828.00 | 0.98  | 1.18 |
| 0.70  | 0.40  | 2044.00 | 3.13  | 0.60  | 0.29  | 3658.00 | 0.63  | 1.53 |
| 0.28  | 0.16  | 451.00  | 3.55  | 1.02  | 0.50  | 1866.00 | 1.66  | 0.50 |

|      |       |         |       |      |       |         |       |       |
|------|-------|---------|-------|------|-------|---------|-------|-------|
| 2.23 | 1.29  | 1547.00 | 3.10  | 0.57 | 0.28  | 2620.00 | 2.14  | 0.02  |
| 2.68 | 1.55  | 2351.00 | 2.72  | 0.19 | 0.09  | 3678.00 | 1.14  | 1.02  |
| 0.20 | -0.12 | 1240.00 | 3.39  | 0.86 | 0.42  | 2899.00 | 0.83  | 1.33  |
| 2.71 | 1.56  | 2164.00 | 3.19  | 0.66 | 0.32  | 3642.00 | 1.48  | 0.68  |
| 1.18 | -0.68 | 1747.00 | 1.26  | 1.27 | -0.62 | 3161.00 | 1.74  | 0.42  |
| 1.29 | 0.75  | 1422.00 | 1.13  | 1.40 | -0.68 | 2374.00 | 1.05  | 1.11  |
| 0.37 | 0.21  | 2567.00 | 0.66  | 1.87 | -0.91 | 3315.00 | 1.42  | 0.74  |
| 1.28 | -0.74 | 1807.00 | 0.94  | 1.59 | -0.77 | 2657.00 | 0.04  | 2.12  |
| 3.94 | 2.28  | 2199.00 | 4.00  | 1.47 | 0.72  | 3374.00 | 1.42  | 0.74  |
| 0.30 | 0.17  | 2387.00 | 2.68  | 0.15 | 0.07  | 3361.00 | 1.19  | 0.97  |
| 0.15 | 0.09  | 1362.00 | 0.81  | 1.72 | -0.84 | 1745.00 | 1.43  | 0.73  |
| 0.22 | 0.12  | 2428.00 | 2.10  | 0.43 | -0.21 | 4907.00 | 1.87  | 0.29  |
| 1.72 | -1.00 | 1373.00 | 1.46  | 1.07 | -0.52 | 3009.00 | 0.43  | 1.73  |
| 1.06 | 0.61  | 1734.00 | 0.35  | 2.18 | -1.06 | 2737.00 | 0.88  | 1.28  |
| 1.50 | 0.87  | 1523.00 | 1.58  | 0.95 | -0.46 | 3223.00 | 0.93  | 1.23  |
| 0.84 | 0.48  | 1042.00 | 1.82  | 0.71 | -0.34 | 2279.00 | 1.10  | 1.06  |
| 4.29 | 2.48  | 924.00  | 1.95  | 0.58 | -0.28 | 1183.00 | 1.86  | 0.30  |
| 1.10 | 0.64  | 2232.00 | 5.11  | 2.58 | 1.26  | 4688.00 | 3.60  | 1.44  |
| 5.27 | 3.04  | 1566.00 | 2.94  | 0.41 | 0.20  | 2723.00 | 2.20  | 0.04  |
| 0.19 | -0.11 | 1426.00 | 1.19  | 1.34 | -0.65 | 2489.00 | 3.21  | 1.05  |
| 0.55 | -0.32 | 1056.00 | 1.52  | 1.01 | -0.49 | 3352.00 | 0.30  | 1.86  |
| 0.92 | 0.53  | 1663.00 | 1.20  | 1.33 | -0.65 | 2736.00 | 4.53  | 2.37  |
| 2.47 | 1.42  | 2205.00 | 3.04  | 0.51 | 0.25  | 4924.00 | 1.32  | 0.84  |
| 9.28 | 5.36  | 1894.00 | 8.08  | 5.55 | 2.70  | 3353.00 | 11.18 | 9.02  |
| 9.11 | 5.26  | 1660.00 | 3.73  | 1.20 | 0.59  | 4051.00 | 8.69  | 6.53  |
| 9.52 | 5.50  | 2583.00 | 9.56  | 7.03 | 3.43  | 3851.00 | 10.18 | 8.02  |
| 1.07 | 0.62  | 2152.00 | 1.21  | 1.32 | -0.64 | 2252.00 | 3.15  | 0.99  |
| 1.88 | -1.09 | 1642.00 | 1.58  | 0.95 | -0.46 | 3168.00 | 2.71  | 0.55  |
| 0.32 | 0.18  | 1089.00 | 2.39  | 0.14 | -0.07 | 1446.00 | 4.77  | 2.61  |
| 1.71 | -0.99 | 1857.00 | 1.78  | 0.75 | -0.37 | 2426.00 | 1.57  | 0.59  |
| 0.68 | -0.40 | 1263.00 | 1.90  | 0.63 | -0.31 | 1506.00 | 2.39  | 0.23  |
| 1.15 | -0.67 | 1553.00 | 1.29  | 1.24 | -0.60 | 2362.00 | 1.52  | 0.64  |
| 1.19 | -0.69 | 1539.00 | 1.62  | 0.91 | -0.44 | 1983.00 | 1.46  | 0.70  |
| 0.93 | 0.54  | 1106.00 | 1.18  | 1.35 | -0.66 | 1980.00 | 1.92  | 0.24  |
| 0.84 | -0.49 | 1705.00 | 3.46  | 0.93 | 0.45  | 3250.00 | 3.08  | 0.92  |
| 1.33 | -0.77 | 472.00  | 1.06  | 1.47 | -0.72 | 1062.00 | 3.58  | 1.42  |
| 0.49 | -0.28 | 1934.00 | 5.58  | 3.05 | 1.49  | 2280.00 | 2.98  | 0.82  |
| 1.32 | -0.76 | 1577.00 | 0.38  | 2.15 | -1.05 | 2532.00 | 1.86  | 0.30  |
| 3.96 | 2.29  | 1944.00 | 6.84  | 4.31 | 2.10  | 2796.00 | 9.30  | 7.14  |
| 1.08 | 0.62  | 2311.00 | 1.99  | 0.54 | -0.26 | 3223.00 | 1.86  | 0.30  |
| 1.28 | 0.74  | 1401.00 | 2.21  | 0.32 | -0.15 | 3308.00 | 3.48  | 1.32  |
| 0.56 | 0.32  | 1488.00 | 2.08  | 0.45 | -0.22 | 2802.00 | 2.82  | 0.66  |
| 0.29 | -0.17 | 2047.00 | 3.42  | 0.89 | 0.43  | 2892.00 | 2.63  | 0.47  |
| 1.04 | 0.60  | 1675.00 | 2.03  | 0.50 | -0.24 | 2960.00 | 7.30  | 5.14  |
| 7.17 | 4.14  | 3781.00 | 11.69 | 9.16 | 4.47  | 4440.00 | 13.20 | 11.04 |
| 1.81 | -1.05 | 2836.00 | 0.56  | 1.97 | -0.96 | 2223.00 | 2.02  | 0.14  |
| 0.98 | -0.57 | 1530.00 | 2.35  | 0.18 | -0.09 | 1454.00 | 2.54  | 0.38  |

|       |       |         |       |       |       |         |       |       |
|-------|-------|---------|-------|-------|-------|---------|-------|-------|
| 2.20  | -1.27 | 2500.00 | 1.56  | 0.97  | -0.47 | 3333.00 | 0.90  | 1.26  |
| 0.20  | 0.11  | 2309.00 | 7.58  | 5.05  | 2.46  | 2971.00 | 3.87  | 1.71  |
| 1.77  | -1.03 | 2880.00 | 4.72  | 2.19  | 1.07  | 3346.00 | 0.69  | 1.47  |
| 1.46  | -0.85 | 1408.00 | 4.19  | 1.66  | 0.81  | 1943.00 | 1.75  | 0.41  |
| 0.01  | -0.01 | 1984.00 | 5.39  | 2.86  | 1.40  | 3363.00 | 2.94  | 0.78  |
| 1.57  | -0.91 | 2294.00 | 2.75  | 0.22  | 0.11  | 3985.00 | 0.35  | 1.81  |
| 0.73  | -0.42 | 675.00  | 3.11  | 0.58  | 0.28  | 1728.00 | 1.91  | 0.25  |
| 2.22  | -1.29 | 969.00  | 3.30  | 0.77  | 0.38  | 1749.00 | 0.46  | 1.70  |
| 2.20  | -1.27 | 1327.00 | 3.62  | 1.09  | 0.53  | 1625.00 | 0.55  | 1.61  |
| 1.44  | -0.83 | 594.00  | 5.05  | 2.52  | 1.23  | 970.00  | 1.24  | 0.92  |
| 1.62  | -0.94 | 816.00  | 6.25  | 3.72  | 1.81  | 1159.00 | 0.69  | 1.47  |
| 2.10  | -1.21 | 1619.00 | 1.73  | 0.80  | -0.39 | 2192.00 | 0.32  | 1.84  |
| 0.27  | 0.16  | 1191.00 | 3.53  | 1.00  | 0.49  | 1068.00 | 3.28  | 1.12  |
| 1.08  | -0.63 | 814.00  | 4.42  | 1.89  | 0.92  | 1707.00 | 4.45  | 2.29  |
| 1.04  | -0.60 | 1641.00 | 1.10  | 1.43  | -0.70 | 2862.00 | 1.22  | 0.94  |
| 6.34  | 3.66  | 1970.00 | 7.67  | 5.14  | 2.50  | 3604.00 | 8.68  | 6.52  |
| 0.89  | -0.52 | 1119.00 | 2.59  | 0.06  | 0.03  | 2197.00 | 5.14  | 2.98  |
| 1.90  | -1.10 | 2122.00 | 2.78  | 0.25  | 0.12  | 4617.00 | 4.68  | 2.52  |
| 6.98  | 4.03  | 1545.00 | 12.10 | 9.57  | 4.67  | 2830.00 | 12.62 | 10.46 |
| 1.71  | -0.99 | 277.00  | 14.08 | 11.55 | 5.63  | 628.00  | 2.87  | 0.71  |
| 0.38  | 0.22  | 3386.00 | 1.74  | 0.79  | -0.38 | 3567.00 | 2.41  | 0.25  |
| 0.80  | 0.46  | 1367.00 | 7.39  | 4.86  | 2.37  | 1075.00 | 3.72  | 1.56  |
| 0.75  | 0.43  | 1290.00 | 4.03  | 1.50  | 0.73  | 1551.00 | 0.71  | 1.45  |
| 0.99  | 0.57  | 2427.00 | 2.88  | 0.35  | 0.17  | 2281.00 | 1.40  | 0.76  |
| 2.88  | 1.66  | 2483.00 | 8.58  | 6.05  | 2.95  | 2865.00 | 3.18  | 1.02  |
| 5.48  | 3.17  | 3366.00 | 11.47 | 8.94  | 4.36  | 3321.00 | 8.49  | 6.33  |
| 0.94  | 0.54  | 2312.00 | 1.82  | 0.71  | -0.35 | 3940.00 | 3.45  | 1.29  |
| 6.94  | 4.01  | 1621.00 | 2.90  | 0.37  | 0.18  | 1819.00 | 1.43  | 0.73  |
| 0.51  | -0.29 | 990.00  | 2.22  | 0.31  | -0.15 | 1138.00 | 1.05  | 1.11  |
| 1.78  | 1.03  | 822.00  | 2.31  | 0.22  | -0.11 | 1595.00 | 1.25  | 0.91  |
| 5.37  | 3.10  | 691.00  | 4.92  | 2.39  | 1.17  | 1520.00 | 2.96  | 0.80  |
| 10.31 | 5.96  | 1710.00 | 13.10 | 10.57 | 5.15  | 1827.00 | 5.47  | 3.31  |
| 1.41  | 0.81  | 2491.00 | 1.89  | 0.64  | -0.31 | 2819.00 | 4.26  | 2.10  |
| 0.58  | -0.33 | 709.00  | 3.81  | 1.28  | 0.62  | 1560.00 | 7.12  | 4.96  |
| 1.24  | 0.72  | 1109.00 | 1.17  | 1.36  | -0.66 | 2089.00 | 4.88  | 2.72  |
| 1.64  | 0.95  | 903.00  | 1.55  | 0.98  | -0.48 | 1654.00 | 3.63  | 1.47  |
| 0.88  | 0.50  | 1530.00 | 1.18  | 1.35  | -0.66 | 2436.00 | 4.06  | 1.90  |
| 0.72  | 0.42  | 3162.00 | 2.66  | 0.13  | 0.06  | 3428.00 | 4.67  | 2.51  |
| 1.22  | 0.70  | 2350.00 | 2.51  | 0.02  | -0.01 | 1774.00 | 2.31  | 0.15  |
| 0.35  | -0.20 | 1179.00 | 0.85  | 1.68  | -0.82 | 1347.00 | 1.78  | 0.38  |
| 1.45  | 0.83  | 1647.00 | 3.95  | 1.42  | 0.69  | 1191.00 | 0.76  | 1.40  |
| 13.67 | 7.90  | 3723.00 | 29.44 | 26.91 | 13.12 | 3203.00 | 10.93 | 8.77  |
| 1.55  | 0.90  | 2372.00 | 4.30  | 1.77  | 0.86  | 2639.00 | 0.34  | 1.82  |
| 0.67  | -0.39 | 2200.00 | 4.23  | 1.70  | 0.83  | 1478.00 | 0.34  | 1.82  |
| 5.02  | 2.90  | 1590.00 | 13.27 | 10.74 | 5.24  | 1573.00 | 4.20  | 2.04  |
| 0.60  | -0.35 | 2186.00 | 2.79  | 0.26  | 0.13  | 1299.00 | 2.62  | 0.46  |
| 0.22  | 0.13  | 2161.00 | 3.42  | 0.89  | 0.44  | 1260.00 | 1.59  | 0.57  |

|              |             |                |              |              |             |                |              |              |
|--------------|-------------|----------------|--------------|--------------|-------------|----------------|--------------|--------------|
| 0.35         | -0.20       | 886.00         | 4.51         | 1.98         | 0.97        | 936.00         | 0.32         | 1.84         |
| 1.53         | -0.89       | 1693.00        | 1.89         | 0.64         | -0.31       | 1175.00        | 2.13         | 0.03         |
| <b>13.36</b> | <b>7.72</b> | <b>1451.00</b> | <b>20.06</b> | <b>17.53</b> | <b>8.54</b> | <b>952.00</b>  | <b>15.65</b> | <b>13.49</b> |
| 2.77         | 1.60        | 1867.00        | 6.64         | 4.11         | <b>2.00</b> | 917.00         | 3.38         | 1.22         |
| 1.43         | -0.83       | 1420.00        | 3.87         | 1.34         | 0.66        | 1305.00        | 0.92         | 1.24         |
| 1.19         | 0.69        | 1805.00        | 5.26         | 2.73         | 1.33        | 975.00         | 3.08         | 0.92         |
| 2.03         | 1.17        | 1384.00        | 3.11         | 0.58         | 0.28        | 1192.00        | 9.06         | <b>6.90</b>  |
| 0.95         | -0.55       | 2385.00        | 3.02         | 0.49         | 0.24        | 1530.00        | 1.90         | 0.26         |
| 1.08         | 0.62        | 2973.00        | 3.80         | 1.27         | 0.62        | 1633.00        | 4.41         | 2.25         |
| 2.17         | 1.25        | 2615.00        | 4.17         | 1.64         | 0.80        | 1878.00        | 10.86        | <b>8.70</b>  |
| <b>7.94</b>  | <b>4.59</b> | <b>4220.00</b> | <b>9.05</b>  | <b>6.52</b>  | <b>3.18</b> | <b>3815.00</b> | <b>8.13</b>  | <b>5.97</b>  |
| 2.23         | 1.29        | 1262.00        | 5.15         | 2.62         | 1.28        | 1254.00        | 10.13        | <b>7.97</b>  |
| 0.73         | -0.42       | 1971.00        | 2.64         | 0.11         | 0.05        | 1493.00        | 2.75         | 0.59         |
| 2.55         | 1.47        | 1842.00        | 6.62         | 4.09         | 2.00        | 2386.00        | 2.47         | 0.31         |
| 1.69         | -0.98       | 2821.00        | 0.60         | 1.93         | -0.94       | 2526.00        | 2.93         | 0.77         |
| 0.68         | -0.39       | 2102.00        | 2.19         | 0.34         | -0.17       | 1073.00        | 0.75         | 1.41         |
| 1.45         | -0.84       | 2447.00        | 2.90         | 0.37         | 0.18        | 2321.00        | 1.81         | 0.35         |
| 1.84         | 1.06        | 2248.00        | 6.23         | 3.70         | 1.80        | 2500.00        | 3.96         | 1.80         |
| 2.88         | 1.67        | 2406.00        | 4.07         | 1.54         | 0.75        | 1812.00        | 1.05         | 1.11         |
| 1.56         | -0.91       | 1995.00        | 4.16         | 1.63         | 0.80        | 1148.00        | 2.96         | 0.80         |
| 0.65         | -0.38       | 2531.00        | 3.36         | 0.83         | 0.40        | 1789.00        | 2.01         | 0.15         |
| 1.49         | -0.87       | 1325.00        | 4.38         | 1.85         | 0.90        | 998.00         | 4.81         | 2.65         |
| 1.97         | -1.14       | 1014.00        | 4.64         | 2.11         | 1.03        | 733.00         | 3.27         | 1.11         |
| 0.19         | -0.11       | 1095.00        | 4.93         | 2.40         | 1.17        | 1492.00        | 4.76         | 2.60         |
| 0.58         | -0.33       | 2320.00        | 3.19         | 0.66         | 0.32        | 2192.00        | 2.10         | 0.06         |
| 1.28         | -0.74       | 2105.00        | 3.80         | 1.27         | 0.62        | 1361.00        | 2.20         | 0.04         |
| 1.47         | -0.85       | 1509.00        | 3.64         | 1.11         | 0.54        | 597.00         | 2.51         | 0.35         |
| 1.01         | -0.58       | 2155.00        | 1.35         | 1.18         | -0.58       | 1439.00        | 4.45         | 2.29         |
| 0.47         | -0.27       | 2426.00        | 3.50         | 0.97         | 0.48        | 2345.00        | 2.17         | 0.01         |
| 1.45         | -0.84       | 2660.00        | 6.77         | <b>4.24</b>  | <b>2.07</b> | 2134.00        | 2.30         | 0.14         |
| 0.50         | 0.29        | 4265.00        | 5.81         | 3.28         | 1.60        | 1254.00        | 2.95         | 0.79         |
| 1.01         | -0.59       | 2312.00        | 1.21         | 1.32         | -0.64       | 1711.00        | 1.69         | 0.47         |
| 1.77         | -1.02       | 976.00         | 1.84         | 0.69         | -0.33       | 675.00         | 6.96         | <b>4.80</b>  |
| 0.79         | -0.46       | 1053.00        | 1.80         | 0.73         | -0.35       | 1488.00        | 0.47         | 1.69         |
| <b>3.99</b>  | <b>2.30</b> | 3198.00        | 7.60         | <b>5.07</b>  | <b>2.47</b> | 2176.00        | 4.46         | 2.30         |
| 0.13         | -0.08       | 3754.00        | 4.24         | 1.71         | 0.83        | 2460.00        | 2.89         | 0.73         |
| 0.31         | 0.18        | 1798.00        | 3.34         | 0.81         | 0.39        | 2260.00        | 2.17         | 0.01         |
| <b>7.28</b>  | <b>4.20</b> | <b>2358.00</b> | <b>8.95</b>  | <b>6.42</b>  | <b>3.13</b> | <b>1532.00</b> | <b>8.16</b>  | <b>6.00</b>  |
| 1.22         | 0.70        | 2986.00        | 5.16         | 2.63         | 1.28        | 2140.00        | 3.83         | 1.67         |
| 1.97         | -1.14       | 2850.00        | 1.58         | 0.95         | -0.46       | 1426.00        | 0.35         | 1.81         |
| <b>5.60</b>  | <b>3.23</b> | 3166.00        | 5.81         | 3.28         | 1.60        | 3365.00        | 4.87         | 2.71         |
| 0.39         | -0.23       | 2016.00        | 2.38         | 0.15         | -0.07       | 1717.00        | 1.92         | 0.24         |
| 0.57         | 0.33        | 1693.00        | 4.31         | 1.78         | 0.87        | 1684.00        | 5.88         | <b>3.72</b>  |
| 1.10         | -0.64       | 1003.00        | 3.99         | 1.46         | 0.71        | 904.00         | 1.77         | 0.39         |
| 1.68         | -0.97       | 1917.00        | 1.36         | 1.17         | -0.57       | 1122.00        | 2.67         | 0.51         |
| 0.19         | 0.11        | 2311.00        | 6.97         | <b>4.44</b>  | <b>2.16</b> | 1066.00        | 5.82         | <b>3.66</b>  |
| 0.32         | -0.19       | 1601.00        | 2.25         | 0.28         | -0.14       | 1277.00        | 1.49         | 0.67         |



|      |       |         |      |      |       |         |      |      |
|------|-------|---------|------|------|-------|---------|------|------|
| 1.12 | 0.64  | 2802.00 | 3.35 | 0.82 | 0.40  | 1592.00 | 2.20 | 0.04 |
| 1.24 | 0.71  | 4040.00 | 7.85 | 5.32 | 2.59  | 2594.00 | 5.63 | 3.47 |
| 0.32 | -0.19 | 3264.00 | 2.51 | 0.02 | -0.01 | 2783.00 | 2.87 | 0.71 |
| 1.39 | -0.80 | 1562.00 | 1.86 | 0.67 | -0.33 | 1565.00 | 1.53 | 0.63 |
| 1.28 | -0.74 | 3987.00 | 1.61 | 0.92 | -0.45 | 2733.00 | 1.94 | 0.22 |
| 0.71 | 0.41  | 4011.00 | 1.05 | 1.48 | -0.72 | 2936.00 | 4.29 | 2.13 |
| 1.29 | -0.75 | 2039.00 | 1.81 | 0.72 | -0.35 | 2218.00 | 0.86 | 1.30 |
| 0.39 | -0.23 | 2575.00 | 2.33 | 0.20 | -0.10 | 1907.00 | 1.31 | 0.85 |
| 0.06 | -0.04 | 5203.00 | 2.67 | 0.14 | 0.07  | 2907.00 | 0.41 | 1.75 |
| 0.99 | -0.57 | 2988.00 | 2.54 | 0.01 | 0.01  | 2194.00 | 0.46 | 1.70 |
| 0.61 | -0.35 | 2174.00 | 2.81 | 0.28 | 0.14  | 2015.00 | 1.04 | 1.12 |
| 0.00 | 0.00  | 874.00  | 1.83 | 0.70 | -0.34 | 634.00  | 3.00 | 0.84 |
| 1.71 | -0.99 | 2410.00 | 0.12 | 2.41 | -1.17 | 991.00  | 0.81 | 1.35 |
| 1.19 | 0.69  | 3164.00 | 2.12 | 0.41 | -0.20 | 2506.00 | 1.56 | 0.60 |
| 0.36 | -0.21 | 1933.00 | 1.19 | 1.34 | -0.65 | 601.00  | 0.83 | 1.33 |
| 0.33 | 0.19  | 4483.00 | 1.18 | 1.35 | -0.66 | 3523.00 | 1.62 | 0.54 |
| 0.96 | 0.55  | 1779.00 | 2.08 | 0.45 | -0.22 | 1768.00 | 0.79 | 1.37 |
| 0.76 | -0.44 | 2729.00 | 2.49 | 0.04 | -0.02 | 1505.00 | 1.33 | 0.83 |
| 1.59 | -0.92 | 2441.00 | 0.25 | 2.28 | -1.11 | 1405.00 | 2.21 | 0.05 |
| 3.72 | 2.15  | 2386.00 | 4.86 | 2.33 | 1.14  | 2405.00 | 4.70 | 2.54 |
| 1.66 | -0.96 | 2811.00 | 0.53 | 2.00 | -0.97 | 1503.00 | 0.00 | 2.16 |
| 0.74 | -0.43 | 3165.00 | 1.55 | 0.98 | -0.48 | 2941.00 | 0.27 | 1.89 |
| 0.31 | 0.18  | 3086.00 | 0.81 | 1.72 | -0.84 | 2120.00 | 1.08 | 1.08 |
| 0.53 | 0.31  | 3053.00 | 6.58 | 4.05 | 1.98  | 2778.00 | 1.15 | 1.01 |
| 0.11 | -0.07 | 2719.00 | 0.48 | 2.05 | -1.00 | 2876.00 | 1.70 | 0.46 |
| 1.41 | -0.81 | 2245.00 | 0.58 | 1.95 | -0.95 | 1980.00 | 1.62 | 0.54 |
| 1.12 | -0.65 | 797.00  | 1.63 | 0.90 | -0.44 | 1414.00 | 1.91 | 0.25 |
| 0.19 | -0.11 | 1165.00 | 0.94 | 1.59 | -0.77 | 926.00  | 4.43 | 2.27 |
| 1.83 | -1.06 | 2313.00 | 2.25 | 0.28 | -0.14 | 1651.00 | 4.42 | 2.26 |
| 1.84 | -1.07 | 3019.00 | 2.88 | 0.35 | 0.17  | 1222.00 | 1.15 | 1.01 |
| 1.16 | -0.67 | 941.00  | 1.70 | 0.83 | -0.40 | 824.00  | 3.16 | 1.00 |
| 7.63 | 4.41  | 737.00  | 8.68 | 6.15 | 3.00  | 907.00  | 4.63 | 2.47 |
| 0.18 | -0.10 | 3535.00 | 2.43 | 0.10 | -0.05 | 2227.00 | 1.21 | 0.95 |
| 0.08 | 0.04  | 4093.00 | 2.69 | 0.16 | 0.08  | 2001.00 | 1.45 | 0.71 |
| 1.18 | -0.69 | 2495.00 | 1.08 | 1.45 | -0.70 | 2169.00 | 1.43 | 0.73 |
| 0.74 | -0.43 | 1549.00 | 1.42 | 1.11 | -0.54 | 1434.00 | 1.19 | 0.97 |
| 1.28 | -0.74 | 2428.00 | 2.35 | 0.18 | -0.09 | 863.00  | 1.97 | 0.19 |
| 0.31 | -0.18 | 2235.00 | 0.67 | 1.86 | -0.90 | 1136.00 | 2.02 | 0.14 |
| 2.38 | -1.38 | 2416.00 | 2.07 | 0.46 | -0.22 | 1126.00 | 2.66 | 0.50 |
| 2.24 | 1.30  | 4455.00 | 2.13 | 0.40 | -0.19 | 1919.00 | 4.53 | 2.37 |
| 0.24 | -0.14 | 2503.00 | 1.88 | 0.65 | -0.32 | 1255.00 | 4.38 | 2.22 |
| 1.73 | -1.00 | 2333.00 | 1.03 | 1.50 | -0.73 | 1216.00 | 2.22 | 0.06 |
| 1.10 | -0.64 | 1990.00 | 1.46 | 1.07 | -0.52 | 1165.00 | 1.63 | 0.53 |
| 0.81 | 0.46  | 3906.00 | 1.66 | 0.87 | -0.42 | 2787.00 | 4.27 | 2.11 |
| 1.79 | 1.04  | 2686.00 | 2.20 | 0.33 | -0.16 | 1875.00 | 1.49 | 0.67 |
| 0.76 | 0.44  | 2174.00 | 1.75 | 0.78 | -0.38 | 1606.00 | 4.92 | 2.76 |
| 0.35 | 0.20  | 3300.00 | 3.94 | 1.41 | 0.69  | 2396.00 | 3.80 | 1.64 |

|       |         |         |       |         |       |         |       |      |
|-------|---------|---------|-------|---------|-------|---------|-------|------|
| 1.95  | -1.13   | 2604.00 | 0.31  | 2.22    | -1.08 | 1560.00 | 2.24  | 0.08 |
| 1.46  | -0.84   | 2047.00 | 0.49  | 2.04    | -0.99 | 964.00  | 0.00  | 2.16 |
| 1.07  | -0.62   | 1615.00 | 1.36  | 1.17    | -0.57 | 1533.00 | 2.15  | 0.01 |
| 0.06  | -0.04   | 3401.00 | 0.97  | 1.56    | -0.76 | 3395.00 | 2.12  | 0.04 |
| 1.75  | -1.01   | 2102.00 | 3.62  | 1.09    | 0.53  | 1877.00 | 0.69  | 1.47 |
| 1.77  | -1.02   | 1661.00 | 0.36  | 2.17    | -1.06 | 1503.00 | 0.80  | 1.36 |
| 0.31  | -0.18   | 2177.00 | 0.46  | 2.07    | -1.01 | 836.00  | 1.32  | 0.84 |
| 0.49  | -0.29   | 2024.00 | 0.69  | 1.84    | -0.89 | 1190.00 | 0.84  | 1.32 |
| 0.60  | -0.35   | 562.00  | 2.49  | 0.04    | -0.02 | 463.00  | 2.16  | 0.00 |
| 1.85  | 1.07    | 888.00  | 0.45  | 2.08    | -1.01 | 353.00  | 1.13  | 1.03 |
| 0.01  | 0.00    | 2025.00 | 0.20  | 2.33    | -1.14 | 1278.00 | 2.82  | 0.66 |
| 0.81  | 0.47    | 3089.00 | 1.81  | 0.72    | -0.35 | 1471.00 | 2.11  | 0.05 |
| 1.50  | 0.87    | 1744.00 | 0.00  | 2.53    | -1.23 | 838.00  | 0.84  | 1.32 |
| 0.84  | 0.48    | 4376.00 | 3.82  | 1.29    | 0.63  | 1826.00 | 1.92  | 0.24 |
| 5.82  | 3.36    | 2747.00 | 1.09  | 1.44    | -0.70 | 1803.00 | 5.88  | 3.72 |
| 0.19  | -0.11   | 3409.00 | 1.23  | 1.30    | -0.63 | 2438.00 | 1.35  | 0.81 |
| 2.59  | 1.49    | 2142.00 | 0.56  | 1.97    | -0.96 | 839.00  | 0.95  | 1.21 |
| 1.22  | 0.71    | 1847.00 | 0.05  | 2.48    | -1.21 | 1266.00 | 1.97  | 0.19 |
| 16.46 | 9.51    | 1273.00 | 3.46  | 0.93    | 0.45  | 1706.00 | 7.21  | 5.05 |
| 1.60  | -0.93   | 724.00  | 0.83  | 1.70    | -0.83 | 1160.00 | 0.86  | 1.30 |
| 1.70  | -0.99   | 2207.00 | 3.72  | 1.19    | 0.58  | 2955.00 | 1.62  | 0.54 |
| 1.11  | -0.64   | 1968.00 | 3.15  | 0.62    | 0.30  | 1277.00 | 2.11  | 0.05 |
| 0.79  | 0.46    | 3278.00 | 3.81  | 1.28    | 0.63  | 3476.00 | 5.26  | 3.10 |
| 0.03  | -0.02   | 763.00  | 1.83  | 0.70    | -0.34 | 589.00  | 3.57  | 1.41 |
| 0.70  | 0.40    | 1006.00 | 4.08  | 1.55    | 0.75  | 1316.00 | 3.34  | 1.18 |
| 1.04  | 0.60    | 3813.00 | 7.58  | 5.05    | 2.46  | 4399.00 | 7.66  | 5.50 |
| 0.39  | -0.22   | 915.00  | 5.68  | 3.15    | 1.54  | 839.00  | 6.44  | 4.28 |
| 0.19  | 0.11    | 1150.00 | 2.52  | 0.01    | 0.00  | 1270.00 | 1.65  | 0.51 |
| 0.49  | 0.28    | 458.00  | 10.92 | 8.39    | 4.09  | 596.00  | 1.68  | 0.48 |
| 0.02  | -0.01   | 3585.00 | 7.39  | 4.86    | 2.37  | 3160.00 | 4.81  | 2.65 |
| 2.73  | 1.58    | 705.00  | 5.53  | 3.00    | 1.46  | 390.00  | 5.38  | 3.22 |
| 1.11  | 0.64    | 993.00  | 6.24  | 3.71    | 1.81  | 498.00  | 1.00  | 1.16 |
| 0.38  | 0.22    | 1032.00 | 1.07  | 1.46    | -0.71 | 1496.00 | 1.27  | 0.89 |
| 12.74 | 7.36    | 2182.00 | 13.66 | 11.13   | 5.42  | 1814.00 | 6.34  | 4.18 |
| 1.26  | 0.73    | 1226.00 | 2.45  | 0.08    | -0.04 | 1082.00 | 2.40  | 0.24 |
| 2.21  | 1.28    | 942.00  | 5.20  | 2.67    | 1.30  | 901.00  | 3.00  | 0.84 |
| 1.11  | 0.64    | 1772.00 | 4.97  | 2.44    | 1.19  | 2259.00 | 3.05  | 0.89 |
| 6.09  | 3.52    | 1496.00 | 12.43 | 9.90    | 4.83  | 2501.00 | 10.88 | 8.72 |
| 1.20  | 0.69    | 445.00  | 4.94  | 2.41    | 1.18  | 617.00  | 2.11  | 0.05 |
| 1.17  |         | 1768.50 | 2.53  | 1.39    |       | 2176.00 | 2.16  | 1.11 |
| 3.51  |         |         |       | 4.16    |       |         |       | 3.33 |
| 1.73  |         |         |       | 2.05    |       |         |       | 1.64 |
|       | 3747.00 | 23.59   |       | 3257.00 | 28.12 |         |       |      |
|       | 3720.00 | 27.07   |       | 2764.00 | 24.17 |         |       |      |
|       | 2376.00 | 26.81   |       | 2706.00 | 16.45 |         |       |      |
|       | 2210.00 | 27.78   |       | 2901.00 | 24.13 |         |       |      |
|       | 3013.25 | 26.31   |       | 2907.00 | 23.22 |         |       |      |

|         |       |         |       |        |      |
|---------|-------|---------|-------|--------|------|
| 834.50  | 1.86  | 247.24  | 4.89  |        |      |
| 639.00  | 0.47  | 1064.00 | 2.82  |        |      |
| 566.00  | 3.89  | 1101.00 | 6.27  |        |      |
| 1440.00 | 0.00  |         |       | 982.00 | 9.27 |
| 1335.00 | 2.85  | 1224.00 | 4.58  |        |      |
| 995.00  | 1.80  | 1129.67 | 4.55  |        |      |
| 456.22  | 1.87  | 83.76   | 1.72  |        |      |
|         | 5.58  |         | 14.66 |        |      |
|         | 5.60  |         | 5.17  |        |      |
|         | 11.18 |         | 19.84 |        |      |
|         | 24.51 |         | 18.66 |        |      |
|         | 0.46  |         | 1.06  |        |      |
|         | 0.54  |         | -0.06 |        |      |
| 69.00   | 10.15 | 115.00  | 5.22  |        |      |
| 69.00   | 18.84 | 92.00   | 2.17  |        |      |
| 1180.00 | 3.47  | 1669.00 | 1.92  |        |      |
| 1397.00 | 5.23  | 1173.00 | 0.85  |        |      |
| 5926.00 | 9.85  | 5586.00 | 8.66  |        |      |
| 5520.00 | 6.76  | 5763.00 | 4.23  |        |      |

rZ

1.15

6.56 y

0.07

-0.07

0.31

2.62 y

0.15

0.17

-0.46

0.09

1.94

-0.09

-0.35

-1.05

1.97

-0.23

-0.87

0.15 x

toxic a,b,c

1.73

1.57

-0.91

-1.04

-1.15

-0.59

-1.11

-1.09

-1.03

-1.00

-0.34

-0.45

-1.21

-0.51

-0.07

-0.93

-0.67

2.22 y

-0.90

-1.23

-0.66

0.05

-0.28

-0.14

0.43

-0.30

2.44

-0.16

-0.23  
0.39  
0.75  
0.25  
1.19  
-0.39  
0.88  
0.19  
0.41  
1.50  
3.94 x  
0.29  
4.41  
0.86  
0.52  
-0.31  
-0.36  
0.55  
-0.50  
-0.14  
0.76  
-0.90  
0.46  
1.84  
-0.37  
0.76  
4.90 y  
0.91  
2.04  
2.47  
3.15 y  
2.36 y  
1.56  
0.03  
-1.17  
0.99  
-0.82  
-0.04  
-0.58  
-0.51  
-0.90  
-0.69  
4.85 y  
1.37 y  
-0.71  
-0.93  
-0.30

debris a,b

-0.01  
-0.62  
-0.81  
-0.41  
-0.25  
-0.67  
-0.45  
-1.29  
-0.45  
-0.59  
-0.44  
-0.17  
-1.05  
-0.78  
-0.75  
-0.65  
-0.18  
0.88  
0.03  
0.64  
-1.13  
1.45  
-0.51  
5.50 y  
3.98 y  
4.89 y  
0.61  
0.34  
1.59  
-0.36  
0.14  
-0.39  
-0.42  
-0.14  
0.56  
0.87  
0.50  
-0.18  
4.35 y  
-0.18  
0.80  
0.40  
0.29  
3.13  
6.73 y  
-0.08  
0.24

-0.77

1.04

-0.89

-0.25

0.48

-1.10

-0.15

-1.03

-0.98

-0.56

-0.89

-1.12

0.68

1.40

-0.57

3.98 y

1.82

1.54

6.37 y

0.43

0.16

0.95

-0.88

-0.46

0.62

3.86 y

0.79

-0.44

-0.67

-0.55

0.49

2.02 y

1.28

3.02

1.66

0.90

1.16

1.53

0.09

-0.23

-0.85

5.34 y

-1.11

-1.11

1.24 x

0.28

-0.35

toxic b,c,

-1.12

-0.02

8.22 y

0.75

-0.75

0.56

4.21

-0.16

1.37

5.30

3.64 y

4.86

0.36

0.19

0.47

-0.86

-0.21

1.10

-0.67

0.49

-0.09

1.62

0.68

1.59

-0.04

0.03

0.22

1.40

0.01

0.09

0.48

-0.28

2.93

-1.03

1.40 x

art a,c

0.44

0.01

3.66 y

1.02

-1.10

1.66

-0.14

2.27

-0.24

0.32

2.23 x

debris a,tox c

-0.41



0.03

2.12 x

debris a,c

0.44

-0.38

-0.13

1.30

-0.79

-0.51

-1.06

-1.04

-0.68

0.51

-0.82

-0.37

-0.81

-0.33

-0.83

-0.50

0.03

1.55

-1.31

-1.15

-0.65

-0.61

-0.28

-0.33

-0.15

1.38

1.38

-0.62

0.61

1.51 x

toxic a,b,c

-0.57

-0.43

-0.44

-0.59

-0.11

-0.08

0.31

1.45

1.36

0.04

-0.32

1.29

-0.40

1.68

1.00

0.05

-1.31

0.00

-0.02

-0.89

-0.83

-0.51

-0.80

0.00

-0.62

0.40

-0.03

-0.80

-0.15

2.27 x

toxic a,b

-0.49

-0.73

-0.11

3.08 x

toxic b,c,

-0.79

-0.32

-0.03

1.89

0.86

0.72

3.35 x

debris a,b

2.61

-0.31

-0.29

1.62

1.97

-0.70

-0.54

2.55 x

toxic a,c

0.15

0.51

0.55

5.31 y

-0.03

| Plate    | Well | Gene                                            | GeneID  | Cell Count | % inf |
|----------|------|-------------------------------------------------|---------|------------|-------|
| 50050.00 | A02  | M-018672- splicing factor, arginine/serine-rich | SFRS1   | 401.00     | 0.75  |
| 50050.00 | A04  | M-019585- selenoprotein W, 1                    | SEPW1   | 1043.00    | 0.48  |
| 50050.00 | A05  | M-016442- pregnancy specific beta-1-glycoprc    | PSG1    | 1544.00    | 0.39  |
| 50050.00 | A06  | M-012062- selenoprotein P, plasma, 1            | SEPP1   | 1274.00    | 0.63  |
| 50050.00 | A07  | M-014693- pregnancy specific beta-1-glycoprc    | PSG2    | 1236.00    | 0.32  |
| 50050.00 | A08  | M-019709- semenogelin II                        | SEMG2   | 1275.00    | 1.33  |
| 50050.00 | A09  | M-014137- pregnancy specific beta-1-glycoprc    | PSG3    | 1255.00    | 0.88  |
| 50050.00 | A10  | M-019708- semenogelin I                         | SEMG1   | 1223.00    | 3.35  |
| 50050.00 | A11  | M-019700- pregnancy specific beta-1-glycoprc    | PSG4    | 1105.00    | 0.27  |
| 50050.00 | A12  | M-020455- trafficking protein particle comple   | TRAPPC2 | 1356.00    | 1.18  |
| 50050.00 | A13  | M-015989- pregnancy specific beta-1-glycoprc    | PSG5    | 570.00     | 0.88  |
| 50050.00 | A14  | M-011387- secreted and transmembrane 1          | SECTM1  | 927.00     | 0.43  |
| 50050.00 | A15  | M-020127- pregnancy specific beta-1-glycoprc    | PSG6    | 941.00     | 3.08  |
| 50050.00 | A16  | M-012351- SEC13 homolog (S. cerevisiae)         | SEC13   | 810.00     | 2.96  |
| 50050.00 | A17  | M-019701- pregnancy specific beta-1-glycoprc    | PSG7    | 1069.00    | 1.03  |
| 50050.00 | A18  | M-013504- stromal cell-derived factor 2         | SDF2    | 1093.00    | 1.56  |
| 50050.00 | A19  | M-017057- pregnancy specific beta-1-glycoprc    | PSG9    | 726.00     | 1.93  |
| 50050.00 | A20  | M-008270- syndecan binding protein (syntenin    | SDCBP   | 1960.00    | 5.26  |
| 50050.00 | A21  | M-019699- pregnancy specific beta-1-glycoprc    | PSG11   | 1928.00    | 3.53  |
| 50050.00 | A23  | M-011758- proteasome (prosome, macropain'       | PSMA3   | 1063.00    | 3.86  |
| 50050.00 | B02  | M-010088- transglutaminase 3 (E polypeptide,    | TGM3    | 1457.00    | 0.34  |
| 50050.00 | B04  | M-003716- trefoil factor 3 (intestinal)         | TFF3    | 2127.00    | 1.13  |
| 50050.00 | B05  | M-005151- splicing factor, arginine/serine-rich | SFRS4   | 1383.00    | 2.31  |
| 50050.00 | B06  | M-010543- trefoil factor 2 (spasmodytic protei  | TFF2    | 2146.00    | 0.79  |
| 50050.00 | B07  | M-007279- splicing factor, arginine/serine-rich | SFRS5   | 967.00     | 3.41  |
| 50050.00 | B08  | M-003715- trefoil factor 1                      | TFF1    | 711.00     | 1.97  |
| 50050.00 | B09  | M-016067- splicing factor, arginine/serine-rich | SFRS6   | 1761.00    | 4.54  |
| 50050.00 | B10  | M-008506- tryptophan 2,3-dioxygenase            | TDO2    | 1411.00    | 0.71  |
| 50050.00 | B11  | M-007278- splicing factor, arginine/serine-rich | SFRS10  | 1400.00    | 0.71  |
| 50050.00 | B12  | M-003780- thymine-DNA glycosylase               | TDG     | 1524.00    | 0.85  |
| 50050.00 | B13  | M-019736- surfactant, pulmonary-associated      | SFTPA2  | 942.00     | 0.64  |
| 50050.00 | B14  | M-017784- t-complex-associated-testis-expres    | TCTE3   | 1456.00    | 1.51  |
| 50050.00 | B15  | M-013002- small glutamine-rich tetratricopepi   | SGTA    | 984.00     | 0.81  |
| 50050.00 | B16  | M-019957- dynein, light chain, Tctex-type 3     | DYNLT3  | 1093.00    | 1.74  |
| 50050.00 | B17  | M-019584- SH3 domain binding glutamic acid-     | SH3BGRL | 2540.00    | 2.80  |
| 50050.00 | B18  | M-015223- tectorin beta                         | TECTB   | 1242.00    | 1.29  |
| 50050.00 | B19  | M-012352- ST3 beta-galactoside alpha-2,3-sial   | ST3GAL2 | 1465.00    | 0.48  |
| 50050.00 | B20  | M-017977- t-complex 11 (mouse)                  | TCP11   | 1443.00    | 2.01  |
| 50050.00 | B21  | M-020143- ST3 beta-galactoside alpha-2,3-sial   | ST3GAL4 | 1106.00    | 1.27  |
| 50050.00 | B23  | M-012260- ST3 beta-galactoside alpha-2,3-sial   | ST3GAL3 | 1065.00    | 0.19  |
| 50050.00 | C02  | M-012653- syndecan 2                            | SDC2    | 1250.00    | 0.24  |
| 50050.00 | C04  | M-010621- syndecan 1                            | SDC1    | 967.00     | 0.83  |
| 50050.00 | C05  | M-017211- proteasome (prosome, macropain'       | PSMA4   | 1357.00    | 1.84  |
| 50050.00 | C06  | M-022618- sarcalumenin                          | SRL     | 1613.00    | 0.56  |
| 50050.00 | C07  | M-011359- proteasome (prosome, macropain'       | PSMA5   | 662.00     | 0.30  |
| 50050.00 | C08  | M-006506- sodium channel, nonvoltage-gated      | SCNN1D  | 1101.00    | 0.09  |

|          |     |                                                               |         |      |
|----------|-----|---------------------------------------------------------------|---------|------|
| 50050.00 | C09 | M-011360- proteasome (prosome, macropain', PSMA6              | 474.00  | 0.00 |
| 50050.00 | C10 | M-017875- sodium channel, voltage-gated, ty $\zeta$ SCN4B     | 1122.00 | 1.69 |
| 50050.00 | C11 | M-004209- proteasome (prosome, macropain', PSMA7              | 469.00  | 0.43 |
| 50050.00 | C12 | M-016088- sodium channel, voltage-gated, ty $\zeta$ SCN2B     | 1659.00 | 0.96 |
| 50050.00 | C13 | M-011361- proteasome (prosome, macropain', PSMB1              | 857.00  | 0.70 |
| 50050.00 | C14 | M-009745- sterol-C5-desaturase (ERG3 delta- $\zeta$ SC5DL     | 1053.00 | 2.09 |
| 50050.00 | C15 | M-010461- proteasome (prosome, macropain', PSMB2              | 1036.00 | 1.16 |
| 50050.00 | C16 | M-021405- SET binding factor 1 SBF1                           | 1785.00 | 1.57 |
| 50050.00 | C17 | M-017489- proteasome (prosome, macropain', PSMB3              | 555.00  | 1.44 |
| 50050.00 | C18 | M-011771- SATB homeobox 1 SATB1                               | 1101.00 | 0.45 |
| 50050.00 | C19 | M-004522- proteasome (prosome, macropain', PSMB5              | 380.00  | 0.00 |
| 50050.00 | C20 | M-013477- seryl-tRNA synthetase SARS                          | 491.00  | 1.83 |
| 50050.00 | C21 | M-006021- proteasome (prosome, macropain', PSMB7              | 1752.00 | 0.46 |
| 50050.00 | C23 | M-006022- proteasome (prosome, macropain', PSMB8              | 1022.00 | 0.39 |
| 50050.00 | D02 | M-019823- t-complex 10 (mouse) TCP10                          | 1139.00 | 1.32 |
| 50050.00 | D04 | M-011188- transcobalamin I (vitamin B12 bind TCN1             | 1192.00 | 0.00 |
| 50050.00 | D05 | M-011775- ST8 alpha-N-acetyl-neuraminide al ST8SIA1           | 1091.00 | 1.37 |
| 50050.00 | D06 | M-011791- chromosome 2 open reading fram $\alpha$ C2orf3      | 967.00  | 0.00 |
| 50050.00 | D07 | M-013435- superkiller viralicidic activity 2-like SKIV2L      | 2097.00 | 0.52 |
| 50050.00 | D08 | M-022116- T-box 15 TBX15                                      | 1489.00 | 0.20 |
| 50050.00 | D09 | M-007426- solute carrier family 1 (glial high af SLC1A2       | 1191.00 | 0.17 |
| 50050.00 | D10 | M-011789- threonyl-tRNA synthetase TARS                       | 882.00  | 0.45 |
| 50050.00 | D11 | M-007427- solute carrier family 1 (glial high af SLC1A3       | 540.00  | 2.41 |
| 50050.00 | D12 | M-031842- synaptotagmin V SYT5                                | 930.00  | 1.18 |
| 50050.00 | D13 | M-007428- solute carrier family 1 (glutamate/i SLC1A4         | 1911.00 | 0.47 |
| 50050.00 | D14 | M-014054- synaptotagmin IV SYT4                               | 1050.00 | 0.48 |
| 50050.00 | D15 | M-007429- solute carrier family 1 (neutral ami SLC1A5         | 1495.00 | 0.87 |
| 50050.00 | D16 | M-010623- synaptophysin-like 1 SYPL1                          | 772.00  | 1.55 |
| 50050.00 | D17 | M-007430- solute carrier family 1 (high affinity, SLC1A6      | 1069.00 | 1.12 |
| 50050.00 | D18 | M-012655- synaptophysin SYP                                   | 847.00  | 0.47 |
| 50050.00 | D19 | M-007431- solute carrier family 1 (glutamate t SLC1A7         | 2771.00 | 0.54 |
| 50050.00 | D20 | M-011787- synapsin II SYN2                                    | 2225.00 | 2.74 |
| 50050.00 | D21 | M-003542- solute carrier family 3 (activators c SLC3A2        | 1396.00 | 0.93 |
| 50050.00 | D23 | M-007582- solute carrier family 4, anion exch $\alpha$ SLC4A2 | 2787.00 | 3.41 |
| 50050.00 | E02 | M-027199- sal-like 2 (Drosophila) SALL2                       | 1116.00 | 0.36 |
| 50050.00 | E04 | M-005150- scaffold attachment factor B SAFB                   | 1697.00 | 1.12 |
| 50050.00 | E05 | M-019822- peptide YY PYY                                      | 573.00  | 0.70 |
| 50050.00 | E06 | M-012747- serum amyloid A4, constitutive SAA4                 | 1990.00 | 0.75 |
| 50050.00 | E07 | M-009578- proteasome (prosome, macropain', PSMC1              | 619.00  | 0.81 |
| 50050.00 | E08 | M-016279- serum amyloid A2 SAA2                               | 1040.00 | 0.58 |
| 50050.00 | E09 | M-008180- proteasome (prosome, macropain', PSMC2              | 824.00  | 2.06 |
| 50050.00 | E10 | M-012717- reticulon 2 RTN2                                    | 1276.00 | 1.41 |
| 50050.00 | E11 | M-008738- proteasome (prosome, macropain', PSMC3              | 270.00  | 2.59 |
| 50050.00 | E12 | M-014138- reticulon 1 RTN1                                    | 1252.00 | 0.24 |
| 50050.00 | E13 | M-009261- proteasome (prosome, macropain', PSMC4              | 325.00  | 1.85 |
| 50050.00 | E14 | M-015055- rhotekin RTKN                                       | 990.00  | 0.81 |
| 50050.00 | E15 | M-009484- proteasome (prosome, macropain', PSMC5              | 379.00  | 0.53 |

|          |     |                                                          |         |         |      |
|----------|-----|----------------------------------------------------------|---------|---------|------|
| 50050.00 | E16 | M-011891- ribosome binding protein 1 homolog             | RRBP1   | 1323.00 | 0.30 |
| 50050.00 | E17 | M-009570- proteasome (prosome, macropain)                | PSMC6   | 920.00  | 3.04 |
| 50050.00 | E18 | M-013679- ribosomal protein S28                          | RPS28   | 560.00  | 0.54 |
| 50050.00 | E19 | M-011363- proteasome (prosome, macropain)                | PSMD1   | 153.00  | 1.96 |
| 50050.00 | E20 | M-013722- ribosomal protein S27a                         | RPS27A  | 274.00  | 4.01 |
| 50050.00 | E21 | M-011364- proteasome (prosome, macropain)                | PSMD3   | 466.00  | 2.15 |
| 50050.00 | E23 | M-013426- proteasome (prosome, macropain)                | PSMD9   | 943.00  | 6.68 |
| 50050.00 | F02 | M-019171- synaptonemal complex protein 1                 | SYCP1   | 2274.00 | 0.22 |
| 50050.00 | F04 | M-020864- synaptobrevin-like 1                           | SYBL1   | 1495.00 | 0.13 |
| 50050.00 | F05 | M-007591- solute carrier family 5 (inositol transporter) | SLC5A3  | 2288.00 | 0.48 |
| 50050.00 | F06 | M-012498- vesicle-associated membrane protein            | VAMP2   | 1022.00 | 2.05 |
| 50050.00 | F07 | M-007592- solute carrier family 5 (low affinity)         | SLC5A4  | 943.00  | 0.64 |
| 50050.00 | F08 | M-012497- vesicle-associated membrane protein            | VAMP1   | 1183.00 | 1.27 |
| 50050.00 | F09 | M-007597- solute carrier family 6 (neurotransmitter)     | SLC6A1  | 1409.00 | 0.50 |
| 50050.00 | F10 | M-017456- surfeit 6                                      | SURF6   | 1521.00 | 0.53 |
| 50050.00 | F11 | M-007606- solute carrier family 6 (neurotransmitter)     | SLC6A6  | 1607.00 | 0.81 |
| 50050.00 | F12 | M-012324- surfeit 5                                      | SURF5   | 453.00  | 0.22 |
| 50050.00 | F13 | M-007607- solute carrier family 6 (neurotransmitter)     | SLC6A7  | 1501.00 | 0.73 |
| 50050.00 | F14 | M-010622- surfeit 4                                      | SURF4   | 974.00  | 0.92 |
| 50050.00 | F15 | M-007609- solute carrier family 6 (neurotransmitter)     | SLC6A9  | 713.00  | 0.56 |
| 50050.00 | F16 | M-017469- surfeit 2                                      | SURF2   | 951.00  | 1.79 |
| 50050.00 | F17 | M-007598- solute carrier family 6 (neurotransmitter)     | SLC6A11 | 1188.00 | 0.25 |
| 50050.00 | F18 | M-009488- sulfotransferase family, cytosolic, 2          | SULT2B1 | 1180.00 | 1.69 |
| 50050.00 | F19 | M-007599- solute carrier family 6 (neurotransmitter)     | SLC6A12 | 2717.00 | 1.80 |
| 50050.00 | F20 | M-009862- sulfotransferase family, cytosolic, 1          | SULT1C2 | 2163.00 | 2.36 |
| 50050.00 | F21 | M-007600- solute carrier family 6 (neurotransmitter)     | SLC6A13 | 1422.00 | 5.49 |
| 50050.00 | F23 | M-007610- solute carrier family 7 (cationic amino acid)  | SLC7A1  | 1516.00 | 0.20 |
| 50050.00 | G02 | M-013675- ribosomal protein S26                          | RPS26   | 339.00  | 2.06 |
| 50050.00 | G04 | M-013629- ribosomal protein S25                          | RPS25   | 707.00  | 0.42 |
| 50050.00 | G05 | M-011366- proteasome (prosome, macropain)                | PSMD10  | 1819.00 | 0.16 |
| 50050.00 | G06 | M-011155- ribosomal protein S24                          | RPS24   | 309.00  | 1.94 |
| 50050.00 | G07 | M-011367- proteasome (prosome, macropain)                | PSMD11  | 890.00  | 0.45 |
| 50050.00 | G08 | M-011154- ribosomal protein S23                          | RPS23   | 187.00  | 2.67 |
| 50050.00 | G09 | M-011368- proteasome (prosome, macropain)                | PSMD12  | 628.00  | 1.43 |
| 50050.00 | G10 | M-011137- ribosomal protein S20                          | RPS20   | 469.00  | 1.28 |
| 50050.00 | G11 | M-011369- proteasome (prosome, macropain)                | PSMD13  | 962.00  | 1.14 |
| 50050.00 | G12 | M-011890- ribosomal protein S18                          | RPS18   | 429.00  | 2.33 |
| 50050.00 | G13 | M-011370- proteasome (prosome, macropain)                | PSME2   | 980.00  | 2.55 |
| 50050.00 | G14 | M-011152- ribosomal protein S17                          | RPS17   | 249.00  | 0.40 |
| 50050.00 | G15 | M-010619- prostaglandin F2 receptor negative             | PTGFRN  | 1152.00 | 1.74 |
| 50050.00 | G16 | M-013542- ribosomal protein S15a                         | RPS15A  | 226.00  | 2.65 |
| 50050.00 | G17 | M-017765- pentraxin-related gene, rapidly induced        | PTX3    | 1238.00 | 0.48 |
| 50050.00 | G18 | M-011151- ribosomal protein S15                          | RPS15   | 329.00  | 2.13 |
| 50050.00 | G19 | M-013704- purine-rich element binding protein            | PURB    | 2639.00 | 4.05 |
| 50050.00 | G20 | M-013532- ribosomal protein S14                          | RPS14   | 646.00  | 2.32 |
| 50050.00 | G21 | M-019703- parvalbumin                                    | PVALB   | 1488.00 | 4.10 |
| 50050.00 | G23 | M-019927- PWP2 periodic tryptophan protein               | PWP2    | 988.00  | 3.64 |

|          |     |                                                 |         |         |      |
|----------|-----|-------------------------------------------------|---------|---------|------|
| 50050.00 | H02 | M-009054- sulfotransferase family, cytosolic, 1 | SULT1A3 | 2147.00 | 1.12 |
| 50050.00 | H04 | M-019626- syntaxin binding protein 3            | STXBP3  | 872.00  | 0.23 |
| 50050.00 | H05 | M-004297- solute carrier family 7 (cationic am  | SLC7A2  | 699.00  | 2.15 |
| 50050.00 | H06 | M-019713- syntaxin binding protein 2            | STXBP2  | 826.00  | 0.85 |
| 50050.00 | H07 | M-007621- solute carrier family 8 (sodium-calc  | SLC8A2  | 971.00  | 6.28 |
| 50050.00 | H08 | M-019571- syntaxin binding protein 1            | STXBP1  | 1277.00 | 1.02 |
| 50050.00 | H09 | M-007615- solute carrier family 7 (cationic am  | SLC7A4  | 1018.00 | 0.20 |
| 50050.00 | H10 | M-017768- syntaxin 5                            | STX5    | 635.00  | 0.47 |
| 50050.00 | H11 | M-007622- solute carrier family 8 (sodium-calc  | SLC8A3  | 1414.00 | 0.78 |
| 50050.00 | H12 | M-016256- syntaxin 4                            | STX4    | 1071.00 | 0.19 |
| 50050.00 | H13 | M-005277- solute carrier family 9 (sodium/hyc   | SLC9A1  | 923.00  | 0.22 |
| 50050.00 | H14 | M-015401- syntaxin 3                            | STX3    | 619.00  | 1.45 |
| 50050.00 | H15 | M-007623- solute carrier family 9 (sodium/hyc   | SLC9A2  | 1136.00 | 1.23 |
| 50050.00 | H16 | M-019572- striatin, calmodulin binding proteir  | STRN    | 953.00  | 1.47 |
| 50050.00 | H17 | M-007624- solute carrier family 9 (sodium/hyc   | SLC9A3  | 1256.00 | 1.04 |
| 50050.00 | H18 | M-009119- sulfotransferase family, cytosolic, 1 | SULT1A2 | 2336.00 | 3.08 |
| 50050.00 | H19 | M-007625- solute carrier family 9 (sodium/hyc   | SLC9A5  | 1747.00 | 0.80 |
| 50050.00 | H20 | M-011785- stromal interaction molecule 1        | STIM1   | 1901.00 | 2.63 |
| 50050.00 | H21 | M-007385- solute carrier family 12 (potassium   | SLC12A4 | 1205.00 | 0.00 |
| 50050.00 | H23 | M-007391- solute carrier family 13 (sodium/sl   | SLC13A1 | 2293.00 | 2.40 |
| 50050.00 | I02 | M-011150- ribosomal protein S13                 | RPS13   | 214.00  | 0.93 |
| 50050.00 | I04 | M-011149- ribosomal protein S12                 | RPS12   | 709.00  | 1.69 |
| 50050.00 | I05 | M-009114- phosphate cytidyltransferase 2, ε     | PCYT2   | 2330.00 | 0.34 |
| 50050.00 | I06 | M-013569- ribosomal protein S11                 | RPS11   | 523.00  | 0.96 |
| 50050.00 | I07 | M-009587- phosphorylase, glycogen; brain        | PYGB    | 1533.00 | 0.65 |
| 50050.00 | I08 | M-011136- ribosomal protein S10                 | RPS10   | 387.00  | 1.81 |
| 50050.00 | I09 | M-010105- pregnancy-zone protein                | PZP     | 1734.00 | 0.40 |
| 50050.00 | I10 | M-011140- ribosomal protein S8                  | RPS8    | 332.00  | 0.90 |
| 50050.00 | I11 | M-008910- glutaminyl-tRNA synthetase            | QARS    | 2882.00 | 0.73 |
| 50050.00 | I12 | M-013700- ribosomal protein S7                  | RPS7    | 246.00  | 0.81 |
| 50050.00 | I13 | M-009820- arginyl-tRNA synthetase               | RARS    | 1315.00 | 0.15 |
| 50050.00 | I14 | M-003024- ribosomal protein S6                  | RPS6    | 240.00  | 0.83 |
| 50050.00 | I15 | M-018969- RNA binding motif (RNP1, RRM) pr      | RBM3    | 1771.00 | 0.23 |
| 50050.00 | I16 | M-013158- ribosomal protein S4, Y-linked 1      | RPS4Y1  | 1695.00 | 0.24 |
| 50050.00 | I17 | M-019588- RNA binding motif protein 4           | RBM4    | 1124.00 | 1.33 |
| 50050.00 | I18 | M-013603- ribosomal protein S3A                 | RPS3A   | 519.00  | 0.77 |
| 50050.00 | I19 | M-003300- retinol binding protein 1, cellular   | RBP1    | 2728.00 | 3.04 |
| 50050.00 | I20 | M-011765- ribophorin II                         | RPN2    | 1264.00 | 2.93 |
| 50050.00 | I21 | M-009825- retinol binding protein 2, cellular   | RBP2    | 2864.00 | 5.62 |
| 50050.00 | I23 | M-011379- reticulocalbin 1, EF-hand calcium b   | RCN1    | 676.00  | 3.99 |
| 50050.00 | J02 | M-006477- stanniocalcin 1                       | STC1    | 1522.00 | 0.13 |
| 50050.00 | J04 | M-011894- staufer, RNA binding protein, hom     | STAU1   | 839.00  | 2.15 |
| 50050.00 | J05 | M-007398- solute carrier family 15 (oligopepti  | SLC15A1 | 776.00  | 0.39 |
| 50050.00 | J06 | M-017338- synovial sarcoma, X breakpoint 5      | SSX5    | 1260.00 | 0.56 |
| 50050.00 | J07 | M-007399- solute carrier family 15 (H+/peptid   | SLC15A2 | 2453.00 | 0.24 |
| 50050.00 | J08 | M-017245- synovial sarcoma, X breakpoint 2      | SSX2    | 1059.00 | 0.19 |
| 50050.00 | J09 | M-007405- solute carrier family 16, member 2    | SLC16A2 | 1768.00 | 1.36 |

|          |     |                                                 |         |         |      |
|----------|-----|-------------------------------------------------|---------|---------|------|
| 50050.00 | J10 | M-015325- sperm specific antigen 2              | SSFA2   | 1164.00 | 1.80 |
| 50050.00 | J11 | M-007411- solute carrier family 17 (sodium ph   | SLC17A1 | 802.00  | 0.50 |
| 50050.00 | J12 | M-021365- single-stranded DNA binding prote     | SSBP1   | 596.00  | 0.34 |
| 50050.00 | J13 | M-007534- solute carrier family 34 (sodium ph   | SLC34A1 | 1057.00 | 0.47 |
| 50050.00 | J14 | M-006877- Sjogren syndrome antigen B (auto      | SSB     | 1874.00 | 8.16 |
| 50050.00 | J15 | M-007419- solute carrier family 18 (vesicular r | SLC18A1 | 1443.00 | 2.43 |
| 50050.00 | J16 | M-017733- TROVE domain family, member 2         | TROVE2  | 885.00  | 3.16 |
| 50050.00 | J17 | M-007420- solute carrier family 18 (vesicular r | SLC18A2 | 1292.00 | 1.86 |
| 50050.00 | J18 | M-005121- signal recognition particle 68kDa     | SRP68   | 631.00  | 0.79 |
| 50050.00 | J19 | M-007421- solute carrier family 18 (vesicular   | SLC18A3 | 2990.00 | 4.65 |
| 50050.00 | J20 | M-005122- signal recognition particle 54kDa     | SRP54   | 2708.00 | 2.29 |
| 50050.00 | J21 | M-007422- solute carrier family 19 (folate trar | SLC19A1 | 2560.00 | 6.76 |
| 50050.00 | J23 | M-007432- solute carrier family 20 (phosphate   | SLC20A1 | 1804.00 | 9.15 |
| 50050.00 | K02 | M-018903- ribophorin I                          | RPN1    | 1633.00 | 2.39 |
| 50050.00 | K04 | M-011382- mitochondrial ribosomal protein S:    | MRPS12  | 1971.00 | 2.99 |
| 50050.00 | K05 | M-011380- reticulocalbin 2, EF-hand calcium b   | RCN2    | 2056.00 | 0.34 |
| 50050.00 | K06 | M-017517- mitochondrial ribosomal protein L:    | MRPL12  | 1664.00 | 0.18 |
| 50050.00 | K07 | M-019070- regenerating islet-derived 1 alpha    | REG1A   | 1041.00 | 0.67 |
| 50050.00 | K08 | M-004314- ribosomal protein, large, P2          | RPLP2   | 530.00  | 1.70 |
| 50050.00 | K09 | M-012297- regenerating islet-derived 1 beta     | REG1B   | 1905.00 | 0.63 |
| 50050.00 | K10 | M-011135- ribosomal protein, large, P1          | RPLP1   | 497.00  | 0.60 |
| 50050.00 | K11 | M-019086- replication factor C (activator 1) 3, | RFC3    | 1242.00 | 1.53 |
| 50050.00 | K12 | M-010864- ribosomal protein, large, P0          | RPLP0   | 297.00  | 0.67 |
| 50050.00 | K13 | M-009773- replication factor C (activator 1) 5, | RFC5    | 778.00  | 0.51 |
| 50050.00 | K14 | M-013480- ribosomal protein L36a                | RPL36A  | 1380.00 | 2.17 |
| 50050.00 | K15 | M-006553- ret finger protein-like 1             | RFPL1   | 1323.00 | 3.02 |
| 50050.00 | K16 | M-011148- ribosomal protein L39                 | RPL39   | 1074.00 | 0.56 |
| 50050.00 | K17 | M-008472- regulator of G-protein signalling 1   | RGS10   | 2018.00 | 1.39 |
| 50050.00 | K18 | M-011133- ribosomal protein L38                 | RPL38   | 602.00  | 0.33 |
| 50050.00 | K19 | M-010340- regulator of G-protein signalling 1   | RGS13   | 1188.00 | 0.17 |
| 50050.00 | K20 | M-013522- ribosomal protein L36a-like           | RPL36AL | 1171.00 | 2.05 |
| 50050.00 | K21 | M-015643- ribonuclease, RNase A family, 1 (p    | RNASE1  | 1507.00 | 2.26 |
| 50050.00 | K23 | M-012651- ribonuclease, RNase A family, 2 (liv  | RNASE2  | 768.00  | 1.30 |
| 50050.00 | L02 | M-019729- signal recognition particle 19kDa     | SRP19   | 2297.00 | 1.52 |
| 50050.00 | L04 | M-017767- signal recognition particle 14kDa     | SRP14   | 1861.00 | 1.45 |
| 50050.00 | L05 | M-007433- solute carrier family 20 (phosphate   | SLC20A2 | 1999.00 | 0.75 |
| 50050.00 | L06 | M-019731- signal recognition particle 9kDa      | SRP9    | 2280.00 | 0.79 |
| 50050.00 | L07 | M-007438- solute carrier organic anion transp   | SLCO2A1 | 2419.00 | 1.36 |
| 50050.00 | L08 | M-019727- sorcin                                | SRI     | 1737.00 | 2.30 |
| 50050.00 | L09 | M-007443- solute carrier family 22 (organic ca  | SLC22A1 | 3355.00 | 1.25 |
| 50050.00 | L10 | M-012770- spectrin, beta, non-erythrocytic 2    | SPTBN2  | 1980.00 | 0.25 |
| 50050.00 | L11 | M-007454- solute carrier family 22 (extraneur   | SLC22A3 | 667.00  | 0.90 |
| 50050.00 | L12 | M-018149- spectrin, beta, non-erythrocytic 1    | SPTBN1  | 548.00  | 1.28 |
| 50050.00 | L13 | M-007453- solute carrier family 22 (organic ca  | SLC22A2 | 996.00  | 1.41 |
| 50050.00 | L14 | M-009933- spectrin, alpha, non-erythrocytic 1   | SPTAN1  | 1681.00 | 1.61 |
| 50050.00 | L15 | M-007455- solute carrier family 22 (organic ca  | SLC22A4 | 1965.00 | 3.16 |
| 50050.00 | L16 | M-019976- small proline-rich protein 3          | SPRR3   | 1081.00 | 1.94 |

|          |     |                                                    |         |         |      |
|----------|-----|----------------------------------------------------|---------|---------|------|
| 50050.00 | L17 | M-019581- sarcolipin                               | SLN     | 2532.00 | 1.03 |
| 50050.00 | L18 | M-019718- small proline-rich protein 2B            | SPRR2B  | 3475.00 | 6.36 |
| 50050.00 | L19 | M-006677- sphingomyelin phosphodiesterase          | SMPD2   | 1988.00 | 0.50 |
| 50050.00 | L20 | M-020096- small proline-rich protein 2A            | SPRR2A  | 4763.00 | 7.33 |
| 50050.00 | L21 | M-019730- SMT3 suppressor of mif two 3 hor         | SUMO3   | 2239.00 | 1.38 |
| 50050.00 | L23 | M-017521- sialic acid binding Ig-like lectin 1, si | SIGLEC1 | 1446.00 | 3.25 |
| 50050.00 | M02 | M-013543- ribosomal protein L35a                   | RPL35A  | 620.00  | 0.97 |
| 50050.00 | M04 | M-013545- ribosomal protein L34                    | RPL34   | 585.00  | 1.71 |
| 50050.00 | M05 | M-012652- ribonuclease, RNase A family, 3 (ec      | RNASE3  | 1864.00 | 3.54 |
| 50050.00 | M06 | M-013587- ribosomal protein L31                    | RPL31   | 524.00  | 1.53 |
| 50050.00 | M07 | M-021381- ribonuclease, RNase A family, 4          | RNASE4  | 1887.00 | 2.38 |
| 50050.00 | M08 | M-012979- ribosomal protein L29                    | RPL29   | 2171.00 | 2.67 |
| 50050.00 | M09 | M-017075- ribonuclease, RNase A family, k6         | RNASE6  | 1925.00 | 0.83 |
| 50050.00 | M10 | M-011145- ribosomal protein L28                    | RPL28   | 1220.00 | 1.15 |
| 50050.00 | M11 | M-006556- ring finger protein 2                    | RNF2    | 2147.00 | 5.87 |
| 50050.00 | M12 | M-011159- ribosomal protein L27a                   | RPL27A  | 363.00  | 6.34 |
| 50050.00 | M13 | M-006558- ring finger protein 5                    | RNF5    | 1003.00 | 4.29 |
| 50050.00 | M14 | M-013604- ribosomal protein L30                    | RPL30   | 701.00  | 5.71 |
| 50050.00 | M15 | M-023273- roundabout, axon guidance recept         | ROBO2   | 2069.00 | 1.06 |
| 50050.00 | M16 | M-012859- ribosomal protein L27                    | RPL27   | 529.00  | 1.13 |
| 50050.00 | M17 | M-031918- retinitis pigmentosa 9 (autosomal        | RP9     | 996.00  | 4.92 |
| 50050.00 | M18 | M-011132- ribosomal protein L26                    | RPL26   | 758.00  | 2.24 |
| 50050.00 | M19 | M-015749- replication protein A1, 70kDa            | RPA1    | 610.00  | 3.44 |
| 50050.00 | M20 | M-011144- ribosomal protein L24                    | RPL24   | 826.00  | 2.66 |
| 50050.00 | M21 | M-017058- replication protein A2, 32kDa            | RPA2    | 816.00  | 3.31 |
| 50050.00 | M23 | M-003322- replication protein A3, 14kDa            | RPA3    | 1449.00 | 8.01 |
| 50050.00 | N02 | M-019725- small proline-rich protein 1B (corni     | SPRR1B  | 716.00  | 0.42 |
| 50050.00 | N04 | M-020095- small proline-rich protein 1A            | SPRR1A  | 432.00  | 0.69 |
| 50050.00 | N05 | M-011394- synaptosomal-associated protein, i       | SNAP25  | 1869.00 | 1.34 |
| 50050.00 | N06 | M-012558- secreted phosphoprotein 1 (osteoa        | SPP1    | 2536.00 | 2.01 |
| 50050.00 | N07 | M-011395- synuclein, beta                          | SNCB    | 2061.00 | 1.16 |
| 50050.00 | N08 | M-013724- sparco/osteonectin, cwcv and kazal-      | SPOCK1  | 1811.00 | 2.87 |
| 50050.00 | N09 | M-019580- small nuclear RNA activating comp        | SNAPC4  | 1434.00 | 2.79 |
| 50050.00 | N10 | M-019720- secreted phosphoprotein 2, 24kDa         | SPP2    | 2753.00 | 1.71 |
| 50050.00 | N11 | M-011396- synuclein, gamma (breast cancer-s        | SNCG    | 1362.00 | 2.20 |
| 50050.00 | N12 | M-004578- serine peptidase inhibitor, Kunitz t     | SPINT1  | 822.00  | 2.19 |
| 50050.00 | N13 | M-018811- small nuclear ribonucleoprotein 7C       | SNRP70  | 566.00  | 1.77 |
| 50050.00 | N14 | M-012759- serine peptidase inhibitor, Kazal ty     | SPINK2  | 1425.00 | 3.65 |
| 50050.00 | N15 | M-019435- small nuclear ribonucleoprotein pc       | SNRPA   | 2577.00 | 1.94 |
| 50050.00 | N16 | M-006039- spastic paraplegia 7 (pure and com       | SPG7    | 2426.00 | 1.53 |
| 50050.00 | N17 | M-019577- small nuclear ribonucleoprotein pc       | SNRPA1  | 968.00  | 2.58 |
| 50050.00 | N18 | M-011397- sperm associated antigen 4               | SPAG4   | 3662.00 | 4.59 |
| 50050.00 | N19 | M-017766- small nuclear ribonucleoprotein pc       | SNRPB   | 1127.00 | 0.71 |
| 50050.00 | N20 | M-017160- UDP-N-acteylglucosamine pyrophc          | UAP1    | 2907.00 | 5.37 |
| 50050.00 | N21 | M-016910- small nuclear ribonucleoprotein pc       | SNRPB2  | 1261.00 | 3.49 |
| 50050.00 | N23 | M-019574- small nuclear ribonucleoprotein pc       | SNRPC   | 1014.00 | 7.79 |
| 50050.00 | O02 | M-013124- mitochondrial ribosomal protein L        | MRPL23  | 799.00  | 2.75 |



|              |                                                |        |         |        |
|--------------|------------------------------------------------|--------|---------|--------|
| 50050.00 O04 | M-012863- ribosomal protein L23a               | RPL23A | 263.00  | 3.04   |
| 50050.00 O05 | M-012767- ribulose-5-phosphate-3-epimerase     | RPE    | 2134.00 | 0.75   |
| 50050.00 O06 | M-011143- ribosomal protein L22                | RPL22  | 1841.00 | 1.90   |
| 50050.00 O07 | M-012975- ribosomal protein L3                 | RPL3   | 747.00  | 2.81   |
| 50050.00 O08 | M-012910- ribosomal protein L21                | RPL21  | 794.00  | 0.50   |
| 50050.00 O09 | M-012009- ribosomal protein L3-like            | RPL3L  | 1098.00 | 0.55   |
| 50050.00 O10 | M-010865- ribosomal protein L19                | RPL19  | 623.00  | 0.32   |
| 50050.00 O11 | M-008956- ribosomal protein L4                 | RPL4   | 441.00  | 1.36   |
| 50050.00 O12 | M-011158- ribosomal protein L18a               | RPL18A | 404.00  | 7.18   |
| 50050.00 O13 | M-012955- ribosomal protein L6                 | RPL6   | 230.00  | 1.74   |
| 50050.00 O14 | M-011142- ribosomal protein L18                | RPL18  | 412.00  | 4.85   |
| 50050.00 O15 | M-013727- ribosomal protein L7                 | RPL7   | 624.00  | 1.12   |
| 50050.00 O16 | M-013633- ribosomal protein L17                | RPL17  | 498.00  | 1.20   |
| 50050.00 O17 | M-011134- ribosomal protein L7a                | RPL7A  | 902.00  | 3.44   |
| 50050.00 O18 | M-013718- ribosomal protein L15                | RPL15  | 1619.00 | 0.43   |
| 50050.00 O19 | M-013721- ribosomal protein L8                 | RPL8   | 654.00  | 2.14   |
| 50050.00 O20 | M-013714- ribosomal protein L13                | RPL13  | 1064.00 | 11.47  |
| 50050.00 O21 | M-011139- ribosomal protein L9                 | RPL9   | 551.00  | 1.09   |
| 50050.00 O23 | M-011141- ribosomal protein L12                | RPL12  | 218.00  | 2.75   |
| 50050.00 P02 | M-017276- SRY (sex determining region Y)-box   | SOX12  | 637.00  | 1.57   |
| 50050.00 P04 | M-017377- SRY (sex determining region Y)-box   | SOX11  | 1283.00 | 3.98   |
| 50050.00 P05 | M-012353- small nuclear ribonucleoprotein D1   | SNRPD1 | 326.00  | 2.76   |
| 50050.00 P06 | M-008203- SRY (sex determining region Y)-box   | SOX5   | 699.00  | 1.72   |
| 50050.00 P07 | M-013617- small nuclear ribonucleoprotein D2   | SNRPD2 | 628.00  | 1.75   |
| 50050.00 P08 | M-012194- SRY (sex determining region Y)-box   | SOX1   | 1077.00 | 3.06   |
| 50050.00 P09 | M-019085- small nuclear ribonucleoprotein D3   | SNRPD3 | 625.00  | 3.68   |
| 50050.00 P10 | M-006037- small optic lobes homolog (Drosop    | SOLH   | 1260.00 | 2.94   |
| 50050.00 P11 | M-019719- small nuclear ribonucleoprotein pc   | SNRPE  | 1376.00 | 4.58   |
| 50050.00 P12 | M-012322- syntrophin, beta 2 (dystrophin-ass   | SNTB2  | 1053.00 | 2.18   |
| 50050.00 P13 | M-020039- regenerating islet-derived-like, par | REGL   | 808.00  | 7.05   |
| 50050.00 P14 | M-017520- sorting nexin 2                      | SNX2   | 1554.00 | 4.38   |
| 50050.00 P15 | M-011160- ribosomal protein L41                | RPL41  | 1298.00 | 3.39   |
| 50050.00 P16 | M-017518- sorting nexin 1                      | SNX1   | 1601.00 | 1.94   |
| 50050.00 P17 | M-013076- secretin                             | SCT    | 1564.00 | 1.66   |
| 50050.00 P18 | M-013125- syntrophin, beta 1 (dystrophin-ass   | SNTB1  | 3876.00 | 3.87   |
| 50050.00 P19 | M-016450- SMT3 suppressor of mif two 3 hor     | SUMO2  | 2441.00 | 1.23   |
| 50050.00 P20 | M-011777- syntrophin, alpha 1 (dystrophin-as   | SNTA1  | 886.00  | 3.84   |
| 50050.00 P21 | M-032463- gametogenetin binding protein 1      | GGNBP1 | 861.00  | 2.90   |
| 50050.00 P23 | M-032420- FSHD region gene 2 protein           | FRG2   | 563.00  | 2.84   |
|              |                                                |        | 1111.00 | 1.36   |
|              |                                                | MAD3   |         |        |
|              |                                                | MADc   |         |        |
| 50050.00 C22 |                                                |        | 2549.00 | 13.495 |
| 50050.00 D22 |                                                |        | 2788.00 | 17.001 |
| 50050.00 E22 |                                                |        | 1282.00 | 12.637 |
| 50050.00 F22 |                                                |        | 1843.00 | 11.72  |
|              |                                                | mn     | 2115.50 | 13.71  |

|              |                                            |           |         |        |
|--------------|--------------------------------------------|-----------|---------|--------|
|              |                                            | sd        | 685.36  | 2.31   |
| 50050.00 G22 | 550.00                                     | 7.2727    |         |        |
| 50050.00 H22 |                                            |           | 538.00  | 1.3011 |
| 50050.00 I22 |                                            |           | 1058.00 | 2.6465 |
| 50050.00 J22 |                                            |           | 2124.00 | 3.3898 |
|              |                                            | mn        | 1240.00 | 2.45   |
|              |                                            | sd        | 808.51  | 1.06   |
|              |                                            | 3psSD     |         | 6.93   |
|              |                                            | 3ngSD     |         | 3.18   |
|              |                                            | SumSD     |         | 10.10  |
|              |                                            | DiffMn    |         | 11.27  |
|              |                                            | SmovrDiff |         | 0.90   |
|              |                                            | 1minus    |         | 0.10   |
| 50050.00 G03 | M-003290- polo-like kinase 1 (Drosophila)  | PLK1 SMAF | 78.00   |        |
| 50050.00 H03 | M-003290- polo-like kinase 1 (Drosophila)  | PLK1 SMAF | 68.00   |        |
| 50050.00 I03 | D-001206-:siControl non-targeting siRNA #2 |           | 1129.00 |        |
| 50050.00 J03 | D-001206-:siControl non-targeting siRNA #2 |           | 1304.00 |        |
| 50050.00 K03 | D-001600-(siGLO RISC-free siRNA            |           | 5004.00 |        |
| 50050.00 L03 | D-001600-(siGLO RISC-free siRNA            |           | 4196.00 |        |

| Abs Dev | rZ    | Cell Count | % inf | Abs Dev | rZ   | Cell Count | % inf   | Abs Dev |      |
|---------|-------|------------|-------|---------|------|------------|---------|---------|------|
| 0.61    | -0.48 | 503.00     |       | 2.19    | 0.67 | 0.51       | 744.00  | 4.03    | 1.90 |
| 0.88    | -0.69 | 1910.00    |       | 1.88    | 0.36 | 0.28       | 830.00  | 0.48    | 1.65 |
| 0.97    | -0.77 | 2138.00    |       | 2.25    | 0.73 | 0.56       | 1536.00 | 0.46    | 1.67 |
| 0.73    | -0.58 | 1905.00    |       | 2.20    | 0.68 | 0.52       | 1114.00 | 1.26    | 0.87 |
| 1.04    | -0.82 | 2318.00    |       | 2.11    | 0.59 | 0.45       | 1655.00 | 1.27    | 0.86 |
| 0.03    | -0.02 | 2393.00    |       | 2.01    | 0.49 | 0.37       | 1586.00 | 1.70    | 0.43 |
| 0.48    | -0.38 | 1450.00    |       | 2.07    | 0.55 | 0.42       | 1287.00 | 1.86    | 0.27 |
| 1.99    | 1.57  | 1673.00    |       | 1.08    | 0.44 | -0.34      | 933.00  | 6.00    | 3.87 |
| 1.09    | -0.86 | 2074.00    |       | 2.80    | 1.28 | 0.98       | 1461.00 | 6.37    | 4.24 |
| 0.18    | -0.14 | 1332.00    |       | 1.35    | 0.17 | -0.13      | 527.00  | 2.09    | 0.04 |
| 0.48    | -0.38 | 1247.00    |       | 2.57    | 1.05 | 0.80       | 856.00  | 0.70    | 1.43 |
| 0.93    | -0.73 | 1644.00    |       | 0.85    | 0.67 | -0.52      | 659.00  | 1.21    | 0.92 |
| 1.72    | 1.36  | 2529.00    |       | 3.20    | 1.68 | 1.29       | 1479.00 | 3.99    | 1.86 |
| 1.60    | 1.27  | 1316.00    |       | 0.84    | 0.68 | -0.53      | 761.00  | 1.97    | 0.16 |
| 0.33    | -0.26 | 1258.00    |       | 2.94    | 1.42 | 1.09       | 1423.00 | 4.64    | 2.51 |
| 0.20    | 0.15  | 2308.00    |       | 0.82    | 0.70 | -0.54      | 1012.00 | 1.78    | 0.35 |
| 0.57    | 0.45  | 1477.00    |       | 0.54    | 0.98 | -0.75      | 774.00  | 1.68    | 0.45 |
| 3.90    | 3.07  | 2206.00    |       | 6.39    | 4.87 | 3.74       | 2748.00 | 8.88    | 6.75 |
| 2.17    | 1.71  | 2663.00    |       | 2.59    | 1.07 | 0.82       | 1867.00 | 1.66    | 0.47 |
| 2.50    | 1.97  | 862.00     |       | 0.93    | 0.59 | -0.46      | 644.00  | 4.81    | 2.68 |
| 1.02    | -0.80 | 1899.00    |       | 0.68    | 0.84 | -0.64      | 1527.00 | 0.98    | 1.15 |
| 0.23    | -0.18 | 3213.00    |       | 2.99    | 1.47 | 1.13       | 2388.00 | 2.14    | 0.01 |
| 0.95    | 0.75  | 2227.00    |       | 1.89    | 0.37 | 0.28       | 1791.00 | 2.85    | 0.72 |
| 0.57    | -0.45 | 2431.00    |       | 0.25    | 1.27 | -0.98      | 2388.00 | 0.84    | 1.29 |
| 2.05    | 1.62  | 1698.00    |       | 1.12    | 0.40 | -0.31      | 1474.00 | 1.09    | 1.04 |
| 0.61    | 0.48  | 1598.00    |       | 0.13    | 1.39 | -1.07      | 672.00  | 1.04    | 1.09 |
| 3.18    | 2.51  | 2725.00    |       | 0.55    | 0.97 | -0.75      | 1252.00 | 0.48    | 1.65 |
| 0.65    | -0.51 | 3033.00    |       | 1.22    | 0.30 | -0.23      | 1668.00 | 2.46    | 0.33 |
| 0.65    | -0.51 | 1541.00    |       | 2.92    | 1.40 | 1.07       | 1552.00 | 2.13    | 0.00 |
| 0.51    | -0.40 | 1387.00    |       | 0.58    | 0.94 | -0.73      | 1243.00 | 1.37    | 0.76 |
| 0.72    | -0.57 | 1258.00    |       | 0.24    | 1.28 | -0.99      | 1164.00 | 2.15    | 0.02 |
| 0.15    | 0.12  | 1956.00    |       | 1.38    | 0.14 | -0.11      | 1020.00 | 0.69    | 1.44 |
| 0.55    | -0.43 | 1392.00    |       | 0.72    | 0.80 | -0.62      | 838.00  | 1.43    | 0.70 |
| 0.38    | 0.30  | 1929.00    |       | 1.87    | 0.35 | 0.26       | 668.00  | 9.43    | 7.30 |
| 1.44    | 1.13  | 3453.00    |       | 2.72    | 1.20 | 0.92       | 2085.00 | 2.78    | 0.65 |
| 0.07    | -0.06 | 1863.00    |       | 2.90    | 1.38 | 1.06       | 1417.00 | 4.52    | 2.39 |
| 0.88    | -0.70 | 3301.00    |       | 1.70    | 0.18 | 0.13       | 2216.00 | 3.52    | 1.39 |
| 0.65    | 0.51  | 1353.00    |       | 0.15    | 1.37 | -1.06      | 2059.00 | 4.32    | 2.19 |
| 0.09    | -0.07 | 1221.00    |       | 0.82    | 0.70 | -0.54      | 1007.00 | 2.88    | 0.75 |
| 1.17    | -0.92 | 1305.00    |       | 1.23    | 0.29 | -0.23      | 1736.00 | 4.21    | 2.08 |
| 1.12    | -0.88 | 1311.00    |       | 0.46    | 1.06 | -0.82      | 1964.00 | 1.07    | 1.06 |
| 0.53    | -0.42 | 1186.00    |       | 1.52    | 0.00 | 0.00       | 827.00  | 3.39    | 1.26 |
| 0.48    | 0.38  | 1672.00    |       | 0.90    | 0.62 | -0.48      | 1654.00 | 2.78    | 0.65 |
| 0.80    | -0.63 | 2034.00    |       | 3.59    | 2.07 | 1.59       | 1914.00 | 1.57    | 0.56 |
| 1.06    | -0.83 | 1701.00    |       | 2.06    | 0.54 | 0.41       | 1567.00 | 3.70    | 1.57 |
| 1.27    | -1.00 | 3539.00    |       | 2.09    | 0.57 | 0.44       | 1860.00 | 1.29    | 0.84 |

|      |       |         |      |      |       |         |       |       |
|------|-------|---------|------|------|-------|---------|-------|-------|
| 1.36 | -1.07 | 937.00  | 0.64 | 0.88 | -0.68 | 295.00  | 7.12  | 4.99  |
| 0.33 | 0.26  | 3403.00 | 1.18 | 0.34 | -0.27 | 1483.00 | 3.91  | 1.78  |
| 0.93 | -0.74 | 819.00  | 4.27 | 2.75 | 2.11  | 816.00  | 4.17  | 2.04  |
| 0.40 | -0.31 | 1382.00 | 1.16 | 0.36 | -0.28 | 1438.00 | 1.60  | 0.53  |
| 0.66 | -0.52 | 850.00  | 0.82 | 0.70 | -0.54 | 902.00  | 4.55  | 2.42  |
| 0.73 | 0.58  | 1880.00 | 2.02 | 0.50 | 0.38  | 1137.00 | 2.81  | 0.68  |
| 0.20 | -0.16 | 1939.00 | 0.93 | 0.59 | -0.46 | 1693.00 | 5.55  | 3.42  |
| 0.21 | 0.17  | 2722.00 | 4.70 | 3.18 | 2.44  | 2181.00 | 12.33 | 10.20 |
| 0.08 | 0.06  | 1167.00 | 0.69 | 0.83 | -0.64 | 1011.00 | 5.93  | 3.80  |
| 0.91 | -0.71 | 1598.00 | 0.13 | 1.39 | -1.07 | 1868.00 | 6.10  | 3.97  |
| 1.36 | -1.07 | 1052.00 | 1.33 | 0.19 | -0.15 | 816.00  | 8.33  | 6.20  |
| 0.47 | 0.37  | 547.00  | 1.10 | 0.42 | -0.33 | 568.00  | 3.52  | 1.39  |
| 0.90 | -0.71 | 2015.00 | 2.83 | 1.31 | 1.00  | 1962.00 | 3.77  | 1.64  |
| 0.97 | -0.76 | 725.00  | 0.55 | 0.97 | -0.75 | 1178.00 | 4.24  | 2.11  |
| 0.04 | -0.03 | 818.00  | 3.42 | 1.90 | 1.46  | 1156.00 | 2.42  | 0.29  |
| 1.36 | -1.07 | 1314.00 | 2.36 | 0.84 | 0.64  | 1194.00 | 2.76  | 0.63  |
| 0.01 | 0.01  | 1153.00 | 1.47 | 0.05 | -0.04 | 1117.00 | 4.12  | 1.99  |
| 1.36 | -1.07 | 2243.00 | 2.14 | 0.62 | 0.47  | 1460.00 | 2.26  | 0.13  |
| 0.84 | -0.66 | 2804.00 | 2.71 | 1.19 | 0.91  | 1824.00 | 2.30  | 0.17  |
| 1.16 | -0.91 | 2487.00 | 4.38 | 2.86 | 2.20  | 1913.00 | 3.29  | 1.16  |
| 1.19 | -0.94 | 2420.00 | 6.24 | 4.72 | 3.62  | 2441.00 | 5.24  | 3.11  |
| 0.91 | -0.71 | 2014.00 | 4.32 | 2.80 | 2.15  | 1084.00 | 7.38  | 5.25  |
| 1.05 | 0.83  | 1101.00 | 5.27 | 3.75 | 2.88  | 1067.00 | 10.12 | 7.99  |
| 0.18 | -0.14 | 823.00  | 1.58 | 0.06 | 0.04  | 1637.00 | 5.13  | 3.00  |
| 0.89 | -0.70 | 1728.00 | 3.01 | 1.49 | 1.14  | 1502.00 | 4.06  | 1.93  |
| 0.88 | -0.70 | 1324.00 | 1.59 | 0.07 | 0.05  | 791.00  | 9.23  | 7.10  |
| 0.49 | -0.39 | 2640.00 | 0.57 | 0.95 | -0.73 | 1355.00 | 3.76  | 1.63  |
| 0.19 | 0.15  | 1801.00 | 5.55 | 4.03 | 3.10  | 1435.00 | 6.97  | 4.84  |
| 0.24 | -0.19 | 1717.00 | 2.33 | 0.81 | 0.62  | 914.00  | 7.22  | 5.09  |
| 0.89 | -0.70 | 1396.00 | 2.94 | 1.42 | 1.09  | 775.00  | 6.45  | 4.32  |
| 0.82 | -0.64 | 3082.00 | 2.86 | 1.34 | 1.02  | 2474.00 | 5.74  | 3.61  |
| 1.38 | 1.09  | 2122.00 | 1.46 | 0.06 | -0.05 | 1656.00 | 5.31  | 3.18  |
| 0.43 | -0.34 | 1629.00 | 1.72 | 0.20 | 0.15  | 1658.00 | 4.34  | 2.21  |
| 2.05 | 1.62  | 1219.00 | 2.21 | 0.69 | 0.53  | 1473.00 | 2.10  | 0.03  |
| 1.00 | -0.79 | 1403.00 | 1.57 | 0.05 | 0.03  | 1667.00 | 1.56  | 0.57  |
| 0.24 | -0.19 | 1538.00 | 0.98 | 0.54 | -0.42 | 461.00  | 3.47  | 1.34  |
| 0.66 | -0.52 | 976.00  | 3.59 | 2.07 | 1.59  | 411.00  | 4.62  | 2.49  |
| 0.61 | -0.48 | 2149.00 | 0.88 | 0.64 | -0.49 | 1028.00 | 1.85  | 0.28  |
| 0.55 | -0.43 | 1261.00 | 1.74 | 0.22 | 0.17  | 614.00  | 4.07  | 1.94  |
| 0.78 | -0.62 | 2009.00 | 3.58 | 2.06 | 1.58  | 872.00  | 6.54  | 4.41  |
| 0.70 | 0.56  | 1354.00 | 2.29 | 0.77 | 0.59  | 593.00  | 3.20  | 1.07  |
| 0.05 | 0.04  | 1610.00 | 0.99 | 0.53 | -0.41 | 992.00  | 3.23  | 1.10  |
| 1.23 | 0.97  | 523.00  | 4.02 | 2.50 | 1.92  | 297.00  | 3.03  | 0.90  |
| 1.12 | -0.88 | 1081.00 | 2.13 | 0.61 | 0.46  | 1183.00 | 7.86  | 5.73  |
| 0.49 | 0.38  | 120.00  | 5.00 | 3.48 | 2.67  | 233.00  | 9.44  | 7.31  |
| 0.55 | -0.43 | 1244.00 | 5.39 | 3.87 | 2.97  | 1430.00 | 0.84  | 1.29  |
| 0.83 | -0.66 | 425.00  | 5.65 | 4.13 | 3.17  | 497.00  | 8.25  | 6.12  |

|      |       |         |       |       |       |         |       |       |
|------|-------|---------|-------|-------|-------|---------|-------|-------|
| 1.06 | -0.83 | 1744.00 | 4.87  | 3.35  | 2.58  | 1848.00 | 8.50  | 6.37  |
| 1.68 | 1.33  | 959.00  | 0.63  | 0.89  | -0.69 | 625.00  | 4.64  | 2.51  |
| 0.82 | -0.65 | 849.00  | 2.36  | 0.84  | 0.64  | 652.00  | 6.75  | 4.62  |
| 0.60 | 0.47  | 194.00  | 8.25  | 6.73  | 5.17  | 113.00  | 20.35 | 18.22 |
| 2.65 | 2.09  | 360.00  | 5.83  | 4.31  | 3.31  | 411.00  | 14.36 | 12.23 |
| 0.79 | 0.62  | 461.00  | 8.24  | 6.72  | 5.16  | 454.00  | 9.91  | 7.78  |
| 5.32 | 4.20  | 765.00  | 3.14  | 1.62  | 1.24  | 1108.00 | 1.53  | 0.60  |
| 1.14 | -0.90 | 1596.00 | 0.13  | 1.39  | -1.07 | 2052.00 | 0.97  | 1.16  |
| 1.23 | -0.97 | 1728.00 | 0.17  | 1.35  | -1.04 | 1775.00 | 1.97  | 0.16  |
| 0.88 | -0.69 | 2201.00 | 0.68  | 0.84  | -0.65 | 2539.00 | 1.69  | 0.44  |
| 0.69 | 0.55  | 1077.00 | 0.09  | 1.43  | -1.10 | 1099.00 | 1.64  | 0.49  |
| 0.72 | -0.57 | 1778.00 | 2.81  | 1.29  | 0.99  | 1008.00 | 3.47  | 1.34  |
| 0.09 | -0.07 | 1233.00 | 3.00  | 1.48  | 1.14  | 945.00  | 2.75  | 0.62  |
| 0.86 | -0.68 | 1321.00 | 1.36  | 0.16  | -0.12 | 922.00  | 1.84  | 0.29  |
| 0.83 | -0.66 | 1437.00 | 2.23  | 0.71  | 0.54  | 1150.00 | 5.83  | 3.70  |
| 0.55 | -0.43 | 1812.00 | 1.60  | 0.08  | 0.06  | 1688.00 | 0.41  | 1.72  |
| 1.14 | -0.90 | 304.00  | 5.26  | 3.74  | 2.87  | 336.00  | 8.63  | 6.50  |
| 0.63 | -0.49 | 1320.00 | 2.27  | 0.75  | 0.58  | 1373.00 | 2.62  | 0.49  |
| 0.44 | -0.34 | 1345.00 | 0.59  | 0.93  | -0.71 | 951.00  | 2.21  | 0.08  |
| 0.80 | -0.63 | 802.00  | 2.37  | 0.85  | 0.65  | 882.00  | 7.48  | 5.35  |
| 0.43 | 0.34  | 1080.00 | 3.06  | 1.54  | 1.18  | 1134.00 | 4.06  | 1.93  |
| 1.11 | -0.87 | 1296.00 | 4.78  | 3.26  | 2.51  | 722.00  | 2.49  | 0.36  |
| 0.33 | 0.26  | 3019.00 | 3.31  | 1.79  | 1.38  | 1333.00 | 2.55  | 0.42  |
| 0.44 | 0.35  | 2245.00 | 6.41  | 4.89  | 3.76  | 2131.00 | 3.10  | 0.97  |
| 1.00 | 0.79  | 1595.00 | 5.27  | 3.75  | 2.88  | 1230.00 | 9.35  | 7.22  |
| 4.13 | 3.25  | 1977.00 | 14.32 | 12.80 | 9.83  | 1389.00 | 7.34  | 5.21  |
| 1.16 | -0.92 | 1206.00 | 4.89  | 3.37  | 2.59  | 2077.00 | 6.93  | 4.80  |
| 0.70 | 0.56  | 284.00  | 1.76  | 0.24  | 0.18  | 408.00  | 1.23  | 0.90  |
| 0.94 | -0.74 | 687.00  | 3.06  | 1.54  | 1.18  | 635.00  | 0.79  | 1.34  |
| 1.20 | -0.94 | 1905.00 | 0.31  | 1.21  | -0.93 | 2052.00 | 1.80  | 0.33  |
| 0.58 | 0.46  | 250.00  | 4.00  | 2.48  | 1.90  | 330.00  | 1.52  | 0.61  |
| 0.91 | -0.72 | 1137.00 | 1.67  | 0.15  | 0.11  | 1095.00 | 0.37  | 1.76  |
| 1.31 | 1.04  | 272.00  | 3.68  | 2.16  | 1.66  | 263.00  | 3.04  | 0.91  |
| 0.07 | 0.06  | 1079.00 | 2.41  | 0.89  | 0.68  | 789.00  | 0.51  | 1.62  |
| 0.08 | -0.06 | 612.00  | 7.68  | 6.16  | 4.73  | 360.00  | 2.78  | 0.65  |
| 0.22 | -0.17 | 1285.00 | 2.41  | 0.89  | 0.68  | 1177.00 | 0.68  | 1.45  |
| 0.97 | 0.77  | 175.00  | 1.71  | 0.19  | 0.15  | 244.00  | 2.46  | 0.33  |
| 1.19 | 0.94  | 1002.00 | 0.60  | 0.92  | -0.71 | 975.00  | 0.72  | 1.41  |
| 0.96 | -0.76 | 616.00  | 0.32  | 1.20  | -0.92 | 392.00  | 2.30  | 0.17  |
| 0.38 | 0.30  | 1384.00 | 0.29  | 1.23  | -0.95 | 1345.00 | 0.97  | 1.16  |
| 1.29 | 1.02  | 127.00  | 3.94  | 2.42  | 1.86  | 121.00  | 4.13  | 2.00  |
| 0.88 | -0.69 | 1919.00 | 0.78  | 0.74  | -0.57 | 1043.00 | 0.67  | 1.46  |
| 0.77 | 0.61  | 510.00  | 1.76  | 0.24  | 0.19  | 560.00  | 0.00  | 2.13  |
| 2.69 | 2.13  | 1248.00 | 0.64  | 0.88  | -0.68 | 1186.00 | 0.84  | 1.29  |
| 0.96 | 0.76  | 496.00  | 1.21  | 0.31  | -0.24 | 747.00  | 0.27  | 1.86  |
| 2.74 | 2.16  | 2118.00 | 4.25  | 2.73  | 2.10  | 2259.00 | 1.42  | 0.71  |
| 2.28 | 1.80  | 1435.00 | 1.67  | 0.15  | 0.12  | 1652.00 | 0.24  | 1.89  |

|      |       |         |      |      |       |         |      |      |
|------|-------|---------|------|------|-------|---------|------|------|
| 0.24 | -0.19 | 2853.00 | 0.67 | 0.85 | -0.66 | 2873.00 | 1.32 | 0.81 |
| 1.13 | -0.89 | 1116.00 | 1.97 | 0.45 | 0.34  | 982.00  | 3.16 | 1.03 |
| 0.79 | 0.62  | 1358.00 | 1.55 | 0.03 | 0.02  | 703.00  | 2.56 | 0.43 |
| 0.51 | -0.40 | 958.00  | 1.57 | 0.05 | 0.03  | 962.00  | 1.56 | 0.57 |
| 4.92 | 3.88  | 797.00  | 0.50 | 1.02 | -0.78 | 734.00  | 2.18 | 0.05 |
| 0.34 | -0.27 | 1368.00 | 1.75 | 0.23 | 0.18  | 1311.00 | 0.15 | 1.98 |
| 1.16 | -0.92 | 2022.00 | 2.97 | 1.45 | 1.11  | 1964.00 | 8.10 | 5.97 |
| 0.89 | -0.70 | 1086.00 | 0.64 | 0.88 | -0.67 | 990.00  | 0.91 | 1.22 |
| 0.58 | -0.46 | 1293.00 | 3.02 | 1.50 | 1.15  | 1484.00 | 1.68 | 0.45 |
| 1.17 | -0.92 | 724.00  | 1.38 | 0.14 | -0.11 | 1404.00 | 4.20 | 2.07 |
| 1.14 | -0.90 | 665.00  | 0.90 | 0.62 | -0.48 | 1036.00 | 4.83 | 2.70 |
| 0.09 | 0.07  | 843.00  | 0.95 | 0.57 | -0.44 | 766.00  | 3.79 | 1.66 |
| 0.13 | -0.10 | 1075.00 | 2.05 | 0.53 | 0.40  | 1262.00 | 3.17 | 1.04 |
| 0.11 | 0.09  | 971.00  | 0.10 | 1.42 | -1.09 | 1411.00 | 2.91 | 0.78 |
| 0.33 | -0.26 | 1155.00 | 1.30 | 0.22 | -0.17 | 997.00  | 5.42 | 3.29 |
| 1.72 | 1.36  | 2421.00 | 0.66 | 0.86 | -0.66 | 3623.00 | 5.41 | 3.28 |
| 0.56 | -0.44 | 1216.00 | 0.49 | 1.03 | -0.79 | 1666.00 | 2.04 | 0.09 |
| 1.27 | 1.00  | 1822.00 | 0.82 | 0.70 | -0.54 | 1475.00 | 4.81 | 2.68 |
| 1.36 | -1.07 | 1234.00 | 1.78 | 0.26 | 0.20  | 2254.00 | 2.04 | 0.09 |
| 1.04 | 0.82  | 2411.00 | 0.58 | 0.94 | -0.72 | 3265.00 | 6.77 | 4.64 |
| 0.43 | -0.33 | 382.00  | 3.66 | 2.14 | 1.65  | 401.00  | 0.25 | 1.88 |
| 0.33 | 0.26  | 563.00  | 1.42 | 0.10 | -0.08 | 815.00  | 1.47 | 0.66 |
| 1.02 | -0.80 | 2519.00 | 0.99 | 0.53 | -0.41 | 2670.00 | 1.20 | 0.93 |
| 0.40 | -0.32 | 554.00  | 0.54 | 0.98 | -0.75 | 688.00  | 0.58 | 1.55 |
| 0.71 | -0.56 | 1431.00 | 2.87 | 1.35 | 1.03  | 2388.00 | 4.61 | 2.48 |
| 0.45 | 0.35  | 236.00  | 5.51 | 3.99 | 3.06  | 406.00  | 1.72 | 0.41 |
| 0.96 | -0.75 | 1247.00 | 0.40 | 1.12 | -0.86 | 1485.00 | 2.29 | 0.16 |
| 0.46 | -0.36 | 390.00  | 2.56 | 1.04 | 0.80  | 254.00  | 0.39 | 1.74 |
| 0.63 | -0.50 | 2061.00 | 1.70 | 0.18 | 0.13  | 2900.00 | 2.79 | 0.66 |
| 0.55 | -0.43 | 241.00  | 1.66 | 0.14 | 0.11  | 259.00  | 3.86 | 1.73 |
| 1.21 | -0.95 | 346.00  | 0.87 | 0.65 | -0.50 | 1745.00 | 0.74 | 1.39 |
| 0.53 | -0.41 | 398.00  | 0.25 | 1.27 | -0.98 | 296.00  | 1.69 | 0.44 |
| 1.13 | -0.89 | 2685.00 | 1.56 | 0.04 | 0.03  | 1952.00 | 1.38 | 0.75 |
| 1.12 | -0.89 | 1060.00 | 1.32 | 0.20 | -0.16 | 1658.00 | 2.29 | 0.16 |
| 0.03 | -0.02 | 862.00  | 1.51 | 0.01 | -0.01 | 828.00  | 1.69 | 0.44 |
| 0.59 | -0.46 | 285.00  | 0.70 | 0.82 | -0.63 | 260.00  | 5.77 | 3.64 |
| 1.68 | 1.33  | 2106.00 | 2.23 | 0.71 | 0.54  | 2226.00 | 2.83 | 0.70 |
| 1.57 | 1.24  | 990.00  | 2.83 | 1.31 | 1.00  | 775.00  | 1.55 | 0.58 |
| 4.26 | 3.36  | 2616.00 | 1.99 | 0.47 | 0.36  | 2602.00 | 5.03 | 2.90 |
| 2.63 | 2.08  | 1171.00 | 0.26 | 1.26 | -0.97 | 905.00  | 0.33 | 1.80 |
| 1.23 | -0.97 | 1463.00 | 0.96 | 0.56 | -0.43 | 1341.00 | 1.79 | 0.34 |
| 0.79 | 0.62  | 1224.00 | 2.04 | 0.52 | 0.40  | 1287.00 | 4.58 | 2.45 |
| 0.97 | -0.77 | 518.00  | 0.77 | 0.75 | -0.58 | 921.00  | 1.52 | 0.61 |
| 0.80 | -0.63 | 1203.00 | 2.24 | 0.72 | 0.55  | 1470.00 | 2.38 | 0.25 |
| 1.12 | -0.88 | 1919.00 | 0.57 | 0.95 | -0.73 | 3372.00 | 4.98 | 2.85 |
| 1.17 | -0.92 | 940.00  | 1.28 | 0.24 | -0.19 | 953.00  | 2.73 | 0.60 |
| 0.00 | 0.00  | 1149.00 | 1.39 | 0.13 | -0.10 | 2321.00 | 2.20 | 0.07 |

|             |             |                |             |             |              |                |              |              |
|-------------|-------------|----------------|-------------|-------------|--------------|----------------|--------------|--------------|
| 0.44        | 0.35        | 2335.00        | 1.58        | 0.06        | 0.05         | 2564.00        | 1.48         | 0.65         |
| 0.86        | -0.68       | 1053.00        | 3.23        | 1.71        | 1.31         | 1235.00        | 4.21         | 2.08         |
| 1.02        | -0.81       | 836.00         | 2.51        | 0.99        | 0.76         | 842.00         | 5.34         | 3.21         |
| 0.89        | -0.70       | 1359.00        | 0.74        | 0.78        | -0.60        | 1638.00        | 3.17         | 1.04         |
| <b>6.80</b> | <b>5.37</b> | <b>1810.00</b> | <b>4.92</b> | <b>3.40</b> | <b>2.61</b>  | <b>2208.00</b> | <b>15.63</b> | <b>13.50</b> |
| 1.07        | 0.84        | 1711.00        | 2.81        | 1.29        | 0.99         | 1520.00        | 2.43         | 0.30         |
| 1.80        | 1.42        | 729.00         | 7.96        | 6.44        | <b>4.94</b>  | 771.00         | 1.17         | 0.96         |
| 0.50        | 0.39        | 1199.00        | 2.75        | 1.23        | 0.94         | 2394.00        | 10.32        | <b>8.19</b>  |
| 0.57        | -0.45       | 673.00         | 4.01        | 2.49        | 1.91         | 758.00         | 4.49         | 2.36         |
| <b>3.29</b> | <b>2.59</b> | <b>1702.00</b> | <b>0.41</b> | <b>1.11</b> | <b>-0.85</b> | <b>3628.00</b> | <b>7.17</b>  | <b>5.04</b>  |
| 0.93        | 0.73        | 1588.00        | 1.20        | 0.32        | -0.25        | 1874.00        | 1.81         | 0.32         |
| <b>5.40</b> | <b>4.26</b> | 1971.00        | 4.11        | 2.59        | 1.99         | 1995.00        | 6.17         | 4.04         |
| <b>7.79</b> | <b>6.14</b> | 2491.00        | 8.71        | 7.19        | <b>5.52</b>  | 2493.00        | 6.98         | <b>4.85</b>  |
| 1.03        | 0.81        | 1668.00        | 1.74        | 0.22        | 0.17         | 1528.00        | 9.23         | <b>7.10</b>  |
| 1.63        | 1.29        | 1218.00        | 1.48        | 0.04        | -0.03        | 2314.00        | 1.04         | 1.09         |
| 1.02        | -0.80       | 1575.00        | 0.83        | 0.69        | -0.54        | 2265.00        | 4.06         | 1.93         |
| 1.18        | -0.93       | 1399.00        | 0.50        | 1.02        | -0.79        | 1884.00        | 3.29         | 1.16         |
| 0.69        | -0.54       | 773.00         | 0.52        | 1.00        | -0.77        | 1015.00        | 6.50         | <b>4.37</b>  |
| 0.34        | 0.27        | 158.00         | 1.90        | 0.38        | 0.29         | 558.00         | 3.58         | 1.45         |
| 0.73        | -0.58       | 1412.00        | 3.19        | 1.67        | 1.28         | 1548.00        | 5.10         | 2.97         |
| 0.76        | -0.60       | 363.00         | 1.38        | 0.14        | -0.11        | 540.00         | 4.26         | 2.13         |
| 0.17        | 0.13        | 499.00         | 1.20        | 0.32        | -0.25        | 805.00         | 1.12         | 1.01         |
| 0.69        | -0.54       | 244.00         | 2.87        | 1.35        | 1.03         | 217.00         | 5.99         | 3.86         |
| 0.85        | -0.67       | 963.00         | 0.73        | 0.79        | -0.61        | 750.00         | 2.13         | 0.00         |
| 0.81        | 0.64        | 682.00         | 2.20        | 0.68        | 0.52         | 1129.00        | 6.29         | <b>4.16</b>  |
| 1.66        | 1.31        | 972.00         | 0.51        | 1.01        | -0.77        | 1339.00        | 2.39         | 0.26         |
| 0.80        | -0.63       | 507.00         | 4.54        | 3.02        | <b>2.32</b>  | 1221.00        | 5.81         | 3.68         |
| 0.03        | 0.02        | 1051.00        | 1.33        | 0.19        | -0.15        | 2327.00        | 1.25         | 0.88         |
| 1.03        | -0.81       | 658.00         | 1.82        | 0.30        | 0.23         | 811.00         | 1.36         | 0.77         |
| 1.19        | -0.94       | 1122.00        | 0.36        | 1.16        | -0.90        | 1275.00        | 0.71         | 1.42         |
| 0.69        | 0.54        | 681.00         | 2.06        | 0.54        | 0.41         | 1270.00        | 3.23         | 1.10         |
| 0.90        | 0.71        | 1279.00        | 0.23        | 1.29        | -0.99        | 2722.00        | 0.51         | 1.62         |
| 0.06        | -0.04       | 1438.00        | 0.35        | 1.17        | -0.90        | 1582.00        | 1.45         | 0.68         |
| 0.16        | 0.13        | 3554.00        | 0.59        | 0.93        | -0.72        | 3072.00        | 0.33         | 1.80         |
| 0.09        | 0.07        | 2335.00        | 1.11        | 0.41        | -0.31        | 2122.00        | 0.24         | 1.89         |
| 0.61        | -0.48       | 1863.00        | 0.64        | 0.88        | -0.68        | 2862.00        | 0.59         | 1.54         |
| 0.57        | -0.45       | 2168.00        | 0.42        | 1.10        | -0.85        | 3122.00        | 0.61         | 1.52         |
| 0.00        | 0.00        | 2379.00        | 1.81        | 0.29        | 0.22         | 3250.00        | 1.97         | 0.16         |
| 0.94        | 0.74        | 1520.00        | 0.46        | 1.06        | -0.82        | 2225.00        | 0.18         | 1.95         |
| 0.11        | -0.08       | 2758.00        | 0.36        | 1.16        | -0.89        | 3703.00        | 0.14         | 1.99         |
| 1.11        | -0.87       | 2117.00        | 0.28        | 1.24        | -0.95        | 2493.00        | 0.56         | 1.57         |
| 0.46        | -0.36       | 909.00         | 1.21        | 0.31        | -0.24        | 1066.00        | 0.75         | 1.38         |
| 0.08        | -0.06       | 713.00         | 0.42        | 1.10        | -0.85        | 699.00         | 1.43         | 0.70         |
| 0.05        | 0.04        | 565.00         | 1.77        | 0.25        | 0.19         | 1177.00        | 0.17         | 1.96         |
| 0.25        | 0.19        | 982.00         | 0.71        | 0.81        | -0.62        | 2746.00        | 0.62         | 1.51         |
| 1.80        | 1.42        | 953.00         | 1.05        | 0.47        | -0.36        | 2223.00        | 0.54         | 1.59         |
| 0.58        | 0.46        | 681.00         | 1.03        | 0.49        | -0.38        | 1193.00        | 1.51         | 0.62         |

|      |       |         |      |      |       |         |       |      |
|------|-------|---------|------|------|-------|---------|-------|------|
| 0.33 | -0.26 | 1520.00 | 0.59 | 0.93 | -0.71 | 2250.00 | 2.58  | 0.45 |
| 5.00 | 3.94  | 3021.00 | 2.71 | 1.19 | 0.92  | 4378.00 | 5.73  | 3.60 |
| 0.86 | -0.68 | 1004.00 | 0.40 | 1.12 | -0.86 | 2513.00 | 0.80  | 1.33 |
| 5.97 | 4.71  | 2458.00 | 2.97 | 1.45 | 1.11  | 5250.00 | 10.00 | 7.87 |
| 0.02 | 0.02  | 1866.00 | 2.41 | 0.89 | 0.68  | 2198.00 | 1.18  | 0.95 |
| 1.89 | 1.49  | 2021.00 | 0.49 | 1.03 | -0.79 | 1757.00 | 0.85  | 1.28 |
| 0.39 | -0.31 | 945.00  | 1.27 | 0.25 | -0.19 | 821.00  | 1.83  | 0.30 |
| 0.35 | 0.28  | 417.00  | 0.72 | 0.80 | -0.62 | 652.00  | 1.99  | 0.14 |
| 2.18 | 1.72  | 1287.00 | 0.93 | 0.59 | -0.45 | 2743.00 | 1.49  | 0.64 |
| 0.17 | 0.13  | 340.00  | 1.18 | 0.34 | -0.27 | 1177.00 | 1.61  | 0.52 |
| 1.02 | 0.81  | 1459.00 | 1.65 | 0.13 | 0.09  | 2912.00 | 7.66  | 5.53 |
| 1.31 | 1.04  | 2221.00 | 0.68 | 0.84 | -0.65 | 2027.00 | 1.13  | 1.00 |
| 0.53 | -0.42 | 1465.00 | 0.34 | 1.18 | -0.91 | 2677.00 | 0.71  | 1.42 |
| 0.21 | -0.17 | 969.00  | 0.72 | 0.80 | -0.61 | 2319.00 | 0.52  | 1.61 |
| 4.51 | 3.56  | 1745.00 | 0.46 | 1.06 | -0.82 | 1926.00 | 3.53  | 1.40 |
| 4.98 | 3.93  | 251.00  | 1.20 | 0.32 | -0.25 | 399.00  | 1.25  | 0.88 |
| 2.93 | 2.31  | 1217.00 | 0.41 | 1.11 | -0.85 | 989.00  | 0.40  | 1.73 |
| 4.35 | 3.43  | 584.00  | 0.86 | 0.66 | -0.51 | 788.00  | 1.14  | 0.99 |
| 0.30 | -0.23 | 2217.00 | 0.54 | 0.98 | -0.75 | 3692.00 | 1.49  | 0.64 |
| 0.23 | -0.18 | 346.00  | 0.87 | 0.65 | -0.50 | 773.00  | 1.29  | 0.84 |
| 3.56 | 2.81  | 932.00  | 0.64 | 0.88 | -0.68 | 1496.00 | 1.60  | 0.53 |
| 0.88 | 0.70  | 348.00  | 4.89 | 3.37 | 2.58  | 549.00  | 1.28  | 0.86 |
| 2.08 | 1.64  | 445.00  | 0.00 | 1.52 | -1.17 | 695.00  | 2.30  | 0.17 |
| 1.30 | 1.03  | 663.00  | 0.15 | 1.37 | -1.05 | 1078.00 | 0.74  | 1.39 |
| 1.95 | 1.54  | 772.00  | 0.39 | 1.13 | -0.87 | 873.00  | 2.18  | 0.05 |
| 6.65 | 5.24  | 885.00  | 0.56 | 0.96 | -0.74 | 1292.00 | 2.09  | 0.04 |
| 0.94 | -0.74 | 469.00  | 0.85 | 0.67 | -0.51 | 795.00  | 0.25  | 1.88 |
| 0.67 | -0.52 | 302.00  | 0.33 | 1.19 | -0.92 | 870.00  | 0.69  | 1.44 |
| 0.02 | -0.02 | 1230.00 | 0.33 | 1.19 | -0.92 | 2599.00 | 2.73  | 0.60 |
| 0.65 | 0.51  | 1668.00 | 1.38 | 0.14 | -0.11 | 3116.00 | 3.66  | 1.53 |
| 0.20 | -0.15 | 780.00  | 1.67 | 0.15 | 0.11  | 1258.00 | 0.79  | 1.34 |
| 1.51 | 1.19  | 1671.00 | 1.44 | 0.08 | -0.07 | 3069.00 | 6.97  | 4.84 |
| 1.43 | 1.13  | 982.00  | 1.53 | 0.01 | 0.00  | 1454.00 | 1.51  | 0.62 |
| 0.35 | 0.27  | 1375.00 | 1.09 | 0.43 | -0.33 | 2724.00 | 0.99  | 1.14 |
| 0.84 | 0.67  | 1207.00 | 0.75 | 0.77 | -0.60 | 2333.00 | 0.30  | 1.83 |
| 0.83 | 0.66  | 1200.00 | 1.00 | 0.52 | -0.40 | 1520.00 | 2.30  | 0.17 |
| 0.41 | 0.32  | 431.00  | 1.16 | 0.36 | -0.28 | 981.00  | 1.33  | 0.80 |
| 2.29 | 1.81  | 643.00  | 1.56 | 0.04 | 0.03  | 1549.00 | 0.65  | 1.48 |
| 0.58 | 0.46  | 1608.00 | 0.12 | 1.40 | -1.07 | 2455.00 | 3.30  | 1.17 |
| 0.17 | 0.13  | 1218.00 | 0.66 | 0.86 | -0.67 | 2016.00 | 0.74  | 1.39 |
| 1.22 | 0.97  | 689.00  | 0.44 | 1.08 | -0.84 | 1720.00 | 1.57  | 0.56 |
| 3.23 | 2.55  | 1785.00 | 1.57 | 0.05 | 0.04  | 2417.00 | 1.57  | 0.56 |
| 0.65 | -0.51 | 522.00  | 2.11 | 0.59 | 0.45  | 1496.00 | 2.34  | 0.21 |
| 4.01 | 3.16  | 1628.00 | 1.47 | 0.05 | -0.04 | 2804.00 | 5.35  | 3.22 |
| 2.13 | 1.68  | 1025.00 | 0.29 | 1.23 | -0.95 | 1739.00 | 2.07  | 0.06 |
| 6.43 | 5.07  | 631.00  | 0.95 | 0.57 | -0.44 | 560.00  | 0.89  | 1.24 |
| 1.39 | 1.10  | 688.00  | 0.73 | 0.79 | -0.61 | 969.00  | 1.55  | 0.58 |



|       |         |         |       |         |       |         |      |      |
|-------|---------|---------|-------|---------|-------|---------|------|------|
| 1.68  | 1.33    | 243.00  | 2.06  | 0.54    | 0.41  | 685.00  | 0.88 | 1.25 |
| 0.61  | -0.48   | 1192.00 | 0.42  | 1.10    | -0.85 | 2526.00 | 0.44 | 1.69 |
| 0.54  | 0.43    | 1489.00 | 1.28  | 0.24    | -0.19 | 2928.00 | 5.16 | 3.03 |
| 1.45  | 1.15    | 404.00  | 0.74  | 0.78    | -0.60 | 720.00  | 0.42 | 1.71 |
| 0.86  | -0.67   | 412.00  | 1.21  | 0.31    | -0.24 | 785.00  | 0.51 | 1.62 |
| 0.81  | -0.64   | 894.00  | 0.34  | 1.18    | -0.91 | 1367.00 | 0.66 | 1.47 |
| 1.04  | -0.82   | 326.00  | 0.31  | 1.21    | -0.93 | 636.00  | 0.31 | 1.82 |
| 0.00  | 0.00    | 483.00  | 0.21  | 1.31    | -1.01 | 473.00  | 0.85 | 1.28 |
| 5.82  | 4.59    | 502.00  | 1.00  | 0.52    | -0.40 | 431.00  | 0.70 | 1.43 |
| 0.38  | 0.30    | 151.00  | 3.31  | 1.79    | 1.37  | 287.00  | 5.92 | 3.79 |
| 3.49  | 2.76    | 203.00  | 0.99  | 0.53    | -0.41 | 427.00  | 1.64 | 0.49 |
| 0.24  | -0.19   | 396.00  | 0.51  | 1.01    | -0.78 | 750.00  | 0.27 | 1.86 |
| 0.16  | -0.12   | 253.00  | 0.40  | 1.12    | -0.87 | 543.00  | 3.68 | 1.55 |
| 2.08  | 1.64    | 541.00  | 0.55  | 0.97    | -0.74 | 1004.00 | 1.10 | 1.03 |
| 0.93  | -0.73   | 995.00  | 0.80  | 0.72    | -0.55 | 1995.00 | 1.90 | 0.23 |
| 0.78  | 0.62    | 360.00  | 0.28  | 1.24    | -0.96 | 755.00  | 3.31 | 1.18 |
| 10.11 | 7.97    | 662.00  | 0.30  | 1.22    | -0.94 | 1079.00 | 4.17 | 2.04 |
| 0.27  | -0.21   | 330.00  | 3.64  | 2.12    | 1.62  | 507.00  | 0.39 | 1.74 |
| 1.39  | 1.10    | 413.00  | 1.94  | 0.42    | 0.32  | 399.00  | 1.25 | 0.88 |
| 0.21  | 0.17    | 1007.00 | 6.85  | 5.33    | 4.10  | 952.00  | 0.21 | 1.92 |
| 2.62  | 2.06    | 1129.00 | 5.67  | 4.15    | 3.19  | 1771.00 | 1.41 | 0.72 |
| 1.40  | 1.11    | 310.00  | 5.81  | 4.29    | 3.29  | 504.00  | 0.60 | 1.53 |
| 0.36  | 0.28    | 439.00  | 2.28  | 0.76    | 0.58  | 1338.00 | 1.64 | 0.49 |
| 0.39  | 0.31    | 320.00  | 15.31 | 13.79   | 10.60 | 792.00  | 0.51 | 1.62 |
| 1.70  | 1.34    | 699.00  | 4.15  | 2.63    | 2.02  | 1990.00 | 2.11 | 0.02 |
| 2.32  | 1.83    | 406.00  | 5.42  | 3.90    | 2.99  | 1134.00 | 0.53 | 1.60 |
| 1.58  | 1.24    | 658.00  | 1.82  | 0.30    | 0.23  | 1137.00 | 2.99 | 0.86 |
| 3.22  | 2.54    | 499.00  | 1.60  | 0.08    | 0.06  | 1445.00 | 1.31 | 0.82 |
| 0.82  | 0.65    | 295.00  | 4.75  | 3.23    | 2.48  | 727.00  | 2.75 | 0.62 |
| 5.69  | 4.49    | 563.00  | 3.91  | 2.39    | 1.83  | 1116.00 | 4.12 | 1.99 |
| 3.02  | 2.38    | 924.00  | 7.47  | 5.95    | 4.57  | 3093.00 | 2.97 | 0.84 |
| 2.03  | 1.60    | 907.00  | 3.20  | 1.68    | 1.29  | 1580.00 | 0.44 | 1.69 |
| 0.58  | 0.46    | 1123.00 | 4.81  | 3.29    | 2.52  | 1966.00 | 1.83 | 0.30 |
| 0.30  | 0.24    | 985.00  | 4.06  | 2.54    | 1.95  | 2238.00 | 0.80 | 1.33 |
| 2.51  | 1.98    | 702.00  | 4.84  | 3.32    | 2.55  | 1549.00 | 0.58 | 1.55 |
| 0.13  | -0.10   | 2146.00 | 2.28  | 0.76    | 0.58  | 3785.00 | 1.16 | 0.97 |
| 2.48  | 1.96    | 771.00  | 2.33  | 0.81    | 0.62  | 1107.00 | 1.17 | 0.96 |
| 1.54  | 1.22    | 538.00  | 1.12  | 0.40    | -0.31 | 642.00  | 0.78 | 1.35 |
| 1.48  | 1.17    | 361.00  | 2.49  | 0.97    | 0.75  | 682.00  | 3.52 | 1.39 |
| 0.86  |         | 1217.50 | 1.52  | 0.88    |       | 1260.00 | 2.13 | 1.35 |
| 2.57  |         |         |       | 2.64    |       |         |      | 4.04 |
| 1.27  |         |         |       | 1.30    |       |         |      | 1.99 |
|       | 3645.00 | 29.33   |       | 3693.00 | 32.12 |         |      |      |
|       | 4114.00 | 33.18   |       | 3400.00 | 48.88 |         |      |      |
|       | 1348.00 | 22.63   |       | 2363.00 | 27.34 |         |      |      |
|       | 2755.00 | 30.67   |       | 1830.00 | 19.34 |         |      |      |
|       | 2965.50 | 28.95   |       | 2821.50 | 31.92 |         |      |      |

|         |       |         |       |
|---------|-------|---------|-------|
| 1216.74 | 4.51  | 873.21  | 12.48 |
| 523.00  | 0.76  | 1057.00 | 1.51  |
| 937.00  | 0.75  | 1252.00 | 4.31  |
| 809.00  | 0.99  | 1019.00 | 1.96  |
| 1577.00 | 1.40  | 2223.00 | 4.41  |
| 961.50  | 0.97  | 1387.75 | 3.05  |
| 445.34  | 0.30  | 566.11  | 1.53  |
|         | 13.53 |         | 37.43 |
|         | 0.90  |         | 4.58  |
|         | 14.43 |         | 42.00 |
|         | 27.98 |         | 28.87 |
|         | 0.52  |         | 1.45  |
|         | 0.48  |         | -0.45 |

|         |       |         |      |
|---------|-------|---------|------|
| 80.00   | 13.75 | 95.00   | 3.16 |
| 98.00   | 4.08  | 106.00  | 7.55 |
| 1132.00 | 1.50  | 968.00  | 1.65 |
| 1564.00 | 1.02  | 1613.00 | 3.29 |
| 4182.00 | 1.82  | 5427.00 | 9.47 |
| 4993.00 | 3.55  | 5186.00 | 3.95 |

rZ

0.95

-0.83

-0.84

-0.44

-0.43

-0.22

-0.14

1.94

2.12

-0.02

-0.72

-0.46

0.93

-0.08

1.26

-0.18

-0.23

3.38 x

toxic a, art b

-0.24

1.34

-0.58

0.00

0.36

-0.65

-0.53

-0.55

-0.83

0.16

0.00

-0.38

0.01

-0.73

-0.35

3.66

0.32

1.19

0.69

1.10

0.37

1.04

-0.53

0.63

0.32

-0.28

0.79

-0.42

|        |              |
|--------|--------------|
| 2.50   |              |
| 0.89   |              |
| 1.02   |              |
| -0.27  |              |
| 1.21   |              |
| 0.34   |              |
| 1.71   |              |
| 5.12 x | debris a,c   |
| 1.91   |              |
| 1.99   |              |
| 3.11   |              |
| 0.70   |              |
| 0.82   |              |
| 1.06   |              |
| 0.14   |              |
| 0.32   |              |
| 1.00   |              |
| 0.06   |              |
| 0.08   |              |
| 0.58   |              |
| 1.56   |              |
| 2.63 x | toxic a, c   |
| 4.01 x | toxic a, b c |
| 1.50   |              |
| 0.97   |              |
| 3.56   |              |
| 0.82   |              |
| 2.43 x | toxic a,b,c  |
| 2.55   |              |
| 2.17   |              |
| 1.81   |              |
| 1.60   |              |
| 1.11   |              |
| -0.02  |              |
| -0.29  |              |
| 0.67   |              |
| 1.25   |              |
| -0.14  |              |
| 0.97   |              |
| 2.21   |              |
| 0.54   |              |
| 0.55   |              |
| 0.45   |              |
| 2.87   |              |
| 3.67 x | toxic a,b,c  |
| -0.65  |              |
| 3.07 x | toxic a,b,c  |

|         |             |
|---------|-------------|
| 3.19 x  | toxic a,b,c |
| 1.26    |             |
| 2.31    |             |
| 9.14 x  | toxic a,b,c |
| 6.13 x  | toxic a,b,c |
| 3.90 x  | toxic a,b,c |
| -0.30   |             |
| -0.58   |             |
| -0.08   |             |
| -0.22   |             |
| -0.25   |             |
| 0.67    |             |
| 0.31    |             |
| -0.15   |             |
| 1.85    |             |
| -0.86   |             |
| 3.26 x  | toxic a,b,c |
| 0.24    |             |
| 0.04    |             |
| 2.68    |             |
| 0.96    |             |
| 0.18    |             |
| 0.21    |             |
| 0.48    |             |
| 3.62 x  | toxic a,b,c |
| 2.61 x  | toxic a,b,c |
| 2.41 x  | toxic a,b   |
| -0.46   |             |
| -0.68   |             |
| -0.17   |             |
| -0.31   |             |
| -0.89   |             |
| 0.46    |             |
| -0.82   |             |
| 0.32    |             |
| -0.73   |             |
| 0.16    |             |
| -0.71   |             |
| 0.08    |             |
| -0.59   |             |
| 1.00    |             |
| -0.73   |             |
| -1.07   |             |
| -0.65   |             |
| -0.94   |             |
| -0.36 x | debris a    |
| -0.95   |             |

-0.41  
0.51  
0.21  
-0.29  
0.02  
-0.99  
2.99  
-0.61  
-0.23  
1.04  
1.35  
0.83  
0.52  
0.39  
1.65  
1.64  
-0.05  
1.34  
-0.05  
2.32  
-0.95  
-0.33  
-0.47  
-0.78  
1.24  
-0.21  
0.08  
-0.87  
0.33  
0.87  
-0.70  
-0.22  
-0.38  
0.08  
-0.22  
1.82  
0.35  
-0.29  
1.45  
-0.90  
-0.17  
1.23  
-0.31  
0.12  
1.43  
0.30  
0.03

-0.33  
1.04  
1.61  
0.52  
6.77 y  
0.15  
-0.49  
4.10  
1.18  
2.52 y  
-0.16  
2.02 x  
2.43 x  
3.56  
-0.55  
0.97  
0.58  
2.19  
0.73  
1.49  
1.07  
-0.51  
1.93  
0.00  
2.08  
0.13  
1.85  
-0.45  
-0.39  
-0.72  
0.55  
-0.81  
-0.34  
-0.91  
-0.95  
-0.77  
-0.77  
-0.08  
-0.98  
-1.00  
-0.79  
-0.69  
-0.35  
-0.99  
-0.76  
-0.80  
-0.31

tox b,c  
tox a, debris b,c

0.22

1.81

-0.67

3.95 y

-0.48

-0.64

-0.15

-0.07

-0.32

-0.26

2.77

-0.50

-0.71

-0.81

0.70

-0.44

-0.87

-0.50

-0.32

-0.42

-0.27

-0.43

0.08

-0.70

0.02

-0.02

-0.94

-0.72

0.30

0.76

-0.67

2.43

-0.31

-0.57

-0.92

0.08

-0.41

-0.75

0.58

-0.70

-0.28

-0.28

0.10

1.61

-0.03

-0.62

-0.29



-0.63

-0.85

1.52

-0.86

-0.82

-0.74

-0.91

-0.65

-0.72

1.90

-0.25

-0.94

0.78

-0.52

-0.12

0.59

1.02

-0.87

-0.44

-0.97

-0.36 x

toxic a,b,c

-0.77

-0.25

-0.82

-0.01

-0.81

0.43

-0.41

0.31

1.00

0.42 x

toxic a,b

-0.85

-0.15

-0.67

-0.78

-0.49

-0.48

-0.68

0.69

| Plate    | Well | Gene                    | GeneID           | Cell Count | % inf | Abs Dev |
|----------|------|-------------------------|------------------|------------|-------|---------|
| 50051.00 | A02  | M-011408- thymosin, l   | 7114.00 TMSB4X   | 2480.00    | 2.58  | 1.01    |
| 50051.00 | A04  | M-019686- leukocyte s   | 7940.00 LST1     | 3374.00    | 8.80  | 5.21    |
| 50051.00 | A05  | M-019637- trichohyalin  | 7062.00 TCHH     | 2678.00    | 3.06  | 0.53    |
| 50051.00 | A06  | M-011761- RD RNA bir    | 7936.00 RDBP     | 2866.00    | 3.94  | 0.35    |
| 50051.00 | A07  | M-006045- thimet olig   | 7064.00 THOP1    | 1182.00    | 11.84 | 8.25    |
| 50051.00 | A08  | M-008141- hydroxyste    | 7923.00 HSD17B8  | 1408.00    | 4.26  | 0.67    |
| 50051.00 | A09  | M-006047- tolloid-like  | 7093.00 TLL2     | 629.00     | 9.70  | 6.11    |
| 50051.00 | A10  | M-007338- solute carri  | 7922.00 SLC39A7  | 1765.00    | 8.27  | 4.68    |
| 50051.00 | A11  | M-012949- talin 1       | 7094.00 TLN1     | 1662.00    | 3.67  | 0.08    |
| 50051.00 | A12  | M-013106- HLA-B asso    | 7920.00 BAT5     | 1938.00    | 4.59  | 1.00    |
| 50051.00 | A13  | M-010218- translocati   | 7095.00 TLOC1    | 1679.00    | 4.76  | 1.17    |
| 50051.00 | A14  | M-013701- HLA-B asso    | 7918.00 BAT4     | 1994.00    | 4.01  | 0.42    |
| 50051.00 | A15  | M-010219- tetraspanin   | 7103.00 TSPAN8   | 2056.00    | 6.91  | 3.32    |
| 50051.00 | A16  | M-005062- HLA-B asso    | 7917.00 BAT3     | 1114.00    | 6.37  | 2.78    |
| 50051.00 | A17  | M-010624- tetraspanin   | 7105.00 TSPAN6   | 2102.00    | 2.05  | 1.54    |
| 50051.00 | A18  | M-013299- HLA-B asso    | 7916.00 BAT2     | 1809.00    | 2.60  | 0.99    |
| 50051.00 | A19  | M-010625- tetraspanin   | 7106.00 TSPAN4   | 606.00     | 12.38 | 8.79    |
| 50051.00 | A20  | M-003805- HLA-B asso    | 7919.00 BAT1     | 2596.00    | 2.50  | 1.09    |
| 50051.00 | A21  | M-005742- G protein-c   | 7107.00 GPR137B  | 1811.00    | 5.74  | 2.15    |
| 50051.00 | A23  | M-008621- transmembr    | 7109.00 TMEM1    | 2045.00    | 2.89  | 0.70    |
| 50051.00 | B02  | M-006599- Fc fragmen    | 8857.00 FCGBP    | 1895.00    | 3.38  | 0.21    |
| 50051.00 | B04  | M-017561- dolichyl-ph   | 8818.00 DPM2     | 2420.00    | 5.62  | 2.03    |
| 50051.00 | B05  | M-012228- JTV1 gene     | 7965.00 JTV1     | 2934.00    | 2.59  | 1.00    |
| 50051.00 | B06  | M-021971- WD repeat     | 8816.00 WDR22    | 2993.00    | 1.77  | 1.82    |
| 50051.00 | B07  | M-013066- suppressio    | 7982.00 ST7      | 2602.00    | 3.23  | 0.36    |
| 50051.00 | B08  | M-011536- barrier to a  | 8815.00 BANF1    | 1044.00    | 6.90  | 3.31    |
| 50051.00 | B09  | M-017526- zinc finger   | 7988.00 ZNF212   | 2079.00    | 2.36  | 1.23    |
| 50051.00 | B10  | M-008237- succinate-C   | 8803.00 SUCLA2   | 1468.00    | 3.61  | 0.02    |
| 50051.00 | B11  | M-009648- UBX domai     | 7993.00 UBXD6    | 1734.00    | 3.46  | 0.13    |
| 50051.00 | B12  | M-008677- succinate-C   | 8802.00 SUCLG1   | 1791.00    | 2.62  | 0.97    |
| 50051.00 | B13  | M-019849- MYST histo    | 7994.00 MYST3    | 2909.00    | 1.44  | 2.15    |
| 50051.00 | B14  | M-008918- succinate-C   | 8801.00 SUCLG2   | 1712.00    | 4.44  | 0.85    |
| 50051.00 | B15  | M-003697- prostate st   | 8000.00 PSCA     | 1492.00    | 3.75  | 0.16    |
| 50051.00 | B16  | M-011532- fucose-1-pl   | 8790.00 FPGT     | 2658.00    | 3.12  | 0.47    |
| 50051.00 | B17  | M-007475- solute carri  | 8034.00 SLC25A16 | 2005.00    | 2.79  | 0.80    |
| 50051.00 | B18  | M-011531- matrilin 4    | 8785.00 MATN4    | 2425.00    | 5.48  | 1.89    |
| 50051.00 | B19  | M-019524- soc-2 suppl   | 8036.00 SHOC2    | 3701.00    | 2.92  | 0.67    |
| 50051.00 | B20  | M-019522- sialic acid b | 8778.00 SIGLEC5  | 3352.00    | 1.85  | 1.74    |
| 50051.00 | B21  | M-011425- microfibrill  | 8076.00 MFAP5    | 2128.00    | 2.30  | 1.29    |
| 50051.00 | B23  | M-012281- intraflagelli | 8100.00 IFT88    | 3388.00    | 3.19  | 0.40    |
| 50051.00 | C02  | M-019467- receptor ac   | 7905.00 REEP5    | 4518.00    | 3.63  | 0.04    |
| 50051.00 | C04  | M-012134- ST8 alpha-f   | 7903.00 ST8SIA4  | 4885.00    | 4.28  | 0.69    |
| 50051.00 | C05  | M-019747- tropomodul    | 7111.00 TMOD1    | 4946.00    | 8.63  | 5.04    |
| 50051.00 | C06  | M-019643- sarcolemm     | 7871.00 SLMAP    | 3523.00    | 3.86  | 0.27    |
| 50051.00 | C07  | M-027195- thymopoie     | 7112.00 TMPO     | 3642.00    | 3.46  | 0.13    |
| 50051.00 | C08  | M-007754- sema domai    | 7869.00 SEMA3B   | 3255.00    | 19.75 | 16.16   |

|              |                        |         |          |         |       |      |
|--------------|------------------------|---------|----------|---------|-------|------|
| 50051.00 C09 | M-006048- transmemk    | 7113.00 | TMPRSS2  | 3832.00 | 3.76  | 0.17 |
| 50051.00 C10 | M-016430- interferon-  | 7866.00 | IFRD2    | 2604.00 | 4.76  | 1.17 |
| 50051.00 C11 | M-019787- troponin T   | 7140.00 | TNNT3    | 2669.00 | 4.91  | 1.32 |
| 50051.00 C12 | M-006594- ring finger  | 7844.00 | RNF103   | 1869.00 | 4.71  | 1.12 |
| 50051.00 C13 | M-017809- transition p | 7141.00 | TNP1     | 1541.00 | 7.33  | 3.74 |
| 50051.00 C14 | M-019880- lysosomal a  | 7805.00 | LAPTM5   | 2303.00 | 4.26  | 0.67 |
| 50051.00 C15 | M-015315- transition p | 7142.00 | TNP2     | 2058.00 | 6.95  | 3.36 |
| 50051.00 C16 | M-021414- dynein, axc  | 7802.00 | DNALI1   | 2033.00 | 4.97  | 1.38 |
| 50051.00 C17 | M-010125- tryptophan   | 7166.00 | TPH1     | 2104.00 | 5.32  | 1.73 |
| 50051.00 C18 | M-013027- leucine zip  | 7798.00 | LUZP1    | 1527.00 | 2.75  | 0.84 |
| 50051.00 C19 | M-012784- tropomyos    | 7170.00 | TPM3     | 2250.00 | 3.64  | 0.05 |
| 50051.00 C20 | M-012793- zinc finger, | 7789.00 | ZXDA     | 3475.00 | 4.43  | 0.84 |
| 50051.00 C21 | M-006053- tripeptidyl  | 7174.00 | TPP2     | 2254.00 | 4.44  | 0.85 |
| 50051.00 C23 | M-006054- tryptase, al | 7176.00 | TPS1     | 1507.00 | 7.43  | 3.84 |
| 50051.00 D02 | M-019523- multiple PL  | 8777.00 | MPDZ     | 2501.00 | 0.72  | 2.87 |
| 50051.00 D04 | M-011530- N-ethylmal   | 8775.00 | NAPA     | 381.00  | 10.24 | 6.65 |
| 50051.00 D05 | M-012798- D4, zinc an  | 8110.00 | DPF3     | 2924.00 | 1.30  | 2.29 |
| 50051.00 D06 | M-011529- N-ethylmal   | 8774.00 | NAPG     | 1349.00 | 1.85  | 1.74 |
| 50051.00 D07 | M-021444- adaptor-rel  | 8120.00 | AP3B2    | 2632.00 | 2.01  | 1.58 |
| 50051.00 D08 | M-017545- synaptosor   | 8773.00 | SNAP23   | 1334.00 | 2.25  | 1.34 |
| 50051.00 D09 | M-016060- acidic (leuc | 8125.00 | ANP32A   | 2076.00 | 4.19  | 0.60 |
| 50051.00 D10 | M-008102- tumor necr   | 8771.00 | TNFRSF6B | 2810.00 | 2.28  | 1.31 |
| 50051.00 D11 | M-012192- ST8 alpha-f  | 8128.00 | ST8SIA2  | 1123.00 | 4.01  | 0.42 |
| 50051.00 D12 | M-011528- poly(A) bin  | 8761.00 | PABPC4   | 1691.00 | 4.44  | 0.85 |
| 50051.00 D13 | M-020050- chromoson    | 8131.00 | C16orf35 | 2445.00 | 3.93  | 0.34 |
| 50051.00 D14 | M-009591- CDP-diacyl   | 8760.00 | CDS2     | 1160.00 | 2.16  | 1.43 |
| 50051.00 D15 | M-004953- solute carri | 8140.00 | SLC7A5   | 1705.00 | 4.87  | 1.28 |
| 50051.00 D16 | M-006342- myomesin     | 8736.00 | MYOM1    | 2912.00 | 1.37  | 2.22 |
| 50051.00 D17 | M-019894- coilin       | 8161.00 | COIL     | 1808.00 | 2.21  | 1.38 |
| 50051.00 D18 | M-017399- chromoson    | 8725.00 | C19orf2  | 2804.00 | 3.14  | 0.45 |
| 50051.00 D19 | M-018282- splicing fac | 8175.00 | SF3A2    | 2055.00 | 3.55  | 0.04 |
| 50051.00 D20 | M-011521- sorting nex  | 8724.00 | SNX3     | 2277.00 | 2.77  | 0.82 |
| 50051.00 D21 | M-008176- elongation   | 8178.00 | ELL      | 2426.00 | 2.89  | 0.70 |
| 50051.00 D23 | M-020002- zinc finger  | 8187.00 | ZNF239   | 3170.00 | 0.69  | 2.90 |
| 50051.00 E02 | M-007525- solute carri | 7782.00 | SLC30A4  | 4035.00 | 1.39  | 2.20 |
| 50051.00 E04 | M-007523- solute carri | 7780.00 | SLC30A2  | 4864.00 | 9.03  | 5.44 |
| 50051.00 E05 | M-006055- tryptase al  | 7177.00 | TPSAB1   | 1822.00 | 2.47  | 1.12 |
| 50051.00 E06 | M-007522- solute carri | 7779.00 | SLC30A1  | 2958.00 | 6.19  | 2.60 |
| 50051.00 E07 | M-019757- cysteine-ric | 7180.00 | CRISP2   | 1630.00 | 2.70  | 0.89 |
| 50051.00 E08 | M-012794- zinc finger  | 7776.00 | ZNF236   | 2437.00 | 4.06  | 0.47 |
| 50051.00 E09 | M-011897- translin     | 7247.00 | TSN      | 2075.00 | 5.01  | 1.42 |
| 50051.00 E10 | M-021346- zinc finger  | 7775.00 | ZNF232   | 3275.00 | 4.40  | 0.81 |
| 50051.00 E11 | M-012199- translin-ass | 7257.00 | TSNAX    | 3189.00 | 4.26  | 0.67 |
| 50051.00 E12 | M-020111- zinc finger  | 7773.00 | ZNF230   | 2094.00 | 4.11  | 0.52 |
| 50051.00 E13 | M-012606- testis speci | 7258.00 | TSPY1    | 1652.00 | 3.87  | 0.28 |
| 50051.00 E14 | M-023741- zinc finger  | 7772.00 | ZNF229   | 1229.00 | 5.70  | 2.11 |
| 50051.00 E15 | M-028592- TSPY-like 1  | 7259.00 | TSPYL1   | 759.00  | 8.83  | 5.24 |

|                     |                              |                       |                |              |             |
|---------------------|------------------------------|-----------------------|----------------|--------------|-------------|
| 50051.00 E16        | M-019162- zinc finger        | 7771.00 ZNF228        | 2207.00        | 3.53         | 0.06        |
| 50051.00 E17        | M-011412- tissue spec        | 7264.00 TSTA3         | 2196.00        | 4.28         | 0.69        |
| 50051.00 E18        | M-018647- zinc finger        | 7770.00 ZNF227        | 2003.00        | 4.34         | 0.75        |
| 50051.00 E19        | M-019565- tetratricop        | 7265.00 TTC1          | 1598.00        | 1.75         | 1.84        |
| 50051.00 E20        | M-019147- zinc finger        | 7769.00 ZNF226        | 1015.00        | 4.04         | 0.45        |
| 50051.00 E21        | M-019566- Dnaj (Hsp4         | 7266.00 DNAJC7        | 2182.00        | 2.15         | 1.44        |
| 50051.00 E23        | M-006570- tetratricop        | 7267.00 TTC3          | 2131.00        | 2.02         | 1.57        |
| 50051.00 F02        | M-011520- sorting nex        | 8723.00 SNX4          | 4526.00        | 2.54         | 1.05        |
| <b>50051.00 F04</b> | <b>M-019527- nucleolar p</b> | <b>8715.00 NOL4</b>   | <b>3938.00</b> | <b>5.54</b>  | <b>1.95</b> |
| 50051.00 F05        | M-031779- D4, zinc an        | 8193.00 DPF1          | 2449.00        | 2.53         | 1.06        |
| 50051.00 F06        | M-011519- P antigen f        | 8712.00 PAGE1         | 3699.00        | 2.30         | 1.29        |
| 50051.00 F07        | M-017791- chromosom          | 8209.00 C21orf33      | 4966.00        | 4.25         | 0.66        |
| 50051.00 F08        | M-012619- serpin pept        | 8710.00 SERPINB7      | 3124.00        | 5.63         | 2.04        |
| 50051.00 F09        | M-012310- DiGeorge s         | 8220.00 DGCR14        | 1163.00        | 4.73         | 1.14        |
| 50051.00 F10        | M-013691- UDP-Gal:be         | 8708.00 B3GALT1       | 3725.00        | 2.63         | 0.96        |
| 50051.00 F11        | M-011427- synapsin III       | 8224.00 SYN3          | 3528.00        | 3.97         | 0.38        |
| 50051.00 F12        | M-013692- UDP-Gal:be         | 8707.00 B3GALT2       | 3064.00        | 3.79         | 0.20        |
| 50051.00 F13        | M-019845- GTP bindin         | 8225.00 GTPBP6        | 2777.00        | 2.88         | 0.71        |
| 50051.00 F14        | M-013696- beta-1,3-N         | 8706.00 B3GALNT1      | 3576.00        | 4.47         | 0.88        |
| 50051.00 F15        | M-020040- haloacid de        | 8226.00 HDHD1A        | 3041.00        | 4.24         | 0.65        |
| 50051.00 F16        | M-013697- UDP-Gal:be         | 8705.00 B3GALT4       | 2822.00        | 4.04         | 0.45        |
| 50051.00 F17        | M-019931- splicing fac       | 8227.00 SFRS17A       | 2129.00        | 1.41         | 2.18        |
| 50051.00 F18        | M-011518- UDP-Gal:be         | 8704.00 B4GALT2       | 2848.00        | 2.18         | 1.41        |
| 50051.00 F19        | M-006596- zinc finger        | 8233.00 ZRSR2         | 4512.00        | 3.59         | 0.00        |
| 50051.00 F20        | M-011517- UDP-Gal:be         | 8703.00 B4GALT3       | 5294.00        | 2.66         | 0.93        |
| 50051.00 F21        | M-009065- RNA bindin         | 8241.00 RBM10         | 1817.00        | 1.49         | 2.10        |
| 50051.00 F23        | M-010097- jumonji, AT        | 8242.00 JARID1C       | 1987.00        | 3.12         | 0.47        |
| 50051.00 G02        | M-020334- zinc finger        | 7768.00 ZNF225        | 4503.00        | 4.31         | 0.72        |
| <b>50051.00 G04</b> | <b>M-006593- zinc finger</b> | <b>7767.00 ZNF224</b> | <b>6514.00</b> | <b>10.49</b> | <b>6.90</b> |
| 50051.00 G05        | M-016741- Tu translati       | 7284.00 TUFM          | 2908.00        | 3.82         | 0.23        |
| 50051.00 G06        | M-006592- zinc finger        | 7766.00 ZNF223        | 5251.00        | 3.26         | 0.33        |
| 50051.00 G07        | M-021218- tuftelin 1         | 7286.00 TUFT1         | 2383.00        | 7.39         | <b>3.80</b> |
| 50051.00 G08        | M-004987- zinc finger        | 7764.00 ZNF217        | 4115.00        | 5.59         | 2.00        |
| 50051.00 G09        | M-011415- tubby like p       | 7289.00 TULP3         | 4248.00        | 4.80         | 1.21        |
| 50051.00 G10        | M-009701- zinc finger,       | 7763.00 ZFAND5        | 3224.00        | 5.24         | 1.65        |
| 50051.00 G11        | M-012325- U2 small nu        | 7307.00 U2AF1         | 1636.00        | 4.65         | 1.06        |
| 50051.00 G12        | M-020661- zinc finger        | 7762.00 ZNF215        | 3798.00        | 5.69         | 2.10        |
| 50051.00 G13        | M-006595- zinc finger        | 7310.00 ZRSR1         | 2801.00        | 5.21         | 1.62        |
| 50051.00 G14        | M-020663- zinc finger        | 7761.00 ZNF214        | 3638.00        | 3.11         | 0.48        |
| 50051.00 G15        | M-031782- ubiquitin-c        | 7325.00 UBE2E2        | 3328.00        | 3.61         | 0.02        |
| 50051.00 G16        | M-009473- zinc finger        | 7760.00 ZNF213        | 3864.00        | 2.82         | 0.77        |
| 50051.00 G17        | M-017654- upstream k         | 7342.00 UBP1          | 3175.00        | 2.99         | 0.60        |
| <b>50051.00 G18</b> | <b>M-019511- zinc finger</b> | <b>7757.00 ZNF208</b> | <b>3629.00</b> | <b>8.65</b>  | <b>5.06</b> |
| 50051.00 G19        | M-017260- uroplakin 1        | 7348.00 UPK1B         | 4507.00        | 5.46         | 1.87        |
| 50051.00 G20        | M-019557- zinc finger        | 7756.00 ZNF207        | 2391.00        | 5.86         | 2.27        |
| 50051.00 G21        | M-007538- solute carri       | 7355.00 SLC35A2       | 5079.00        | 5.00         | 1.41        |

|              |                        |                   |         |      |      |
|--------------|------------------------|-------------------|---------|------|------|
| 50051.00 G23 | M-019564- UDP-glucos   | 7358.00 UGDH      | 1387.00 | 5.55 | 1.96 |
| 50051.00 H02 | M-011516- UDP-Gal:be   | 8702.00 B4GALT4   | 4536.00 | 1.46 | 2.14 |
| 50051.00 H04 | M-011515- UDP-N-ace    | 8693.00 GALNT4    | 3752.00 | 2.08 | 1.51 |
| 50051.00 H05 | M-006833- structural r | 8243.00 SMC1A     | 2491.00 | 2.49 | 1.10 |
| 50051.00 H06 | M-013689- hyaluronog   | 8692.00 HYAL2     | 4138.00 | 2.90 | 0.69 |
| 50051.00 H07 | M-009606- ARD1 homi    | 8260.00 ARD1A     | 2139.00 | 3.60 | 0.01 |
| 50051.00 H08 | M-011512- keratin 37   | 8688.00 KRT37     | 1361.00 | 4.92 | 1.33 |
| 50051.00 H09 | M-012420- coagulator   | 8263.00 F8A1      | 3140.00 | 4.08 | 0.49 |
| 50051.00 H10 | M-012317- keratin 38   | 8687.00 KRT38     | 2837.00 | 2.64 | 0.95 |
| 50051.00 H11 | M-011428- transmemk    | 8269.00 TMEM187   | 3425.00 | 2.77 | 0.82 |
| 50051.00 H12 | M-019529- splicing fac | 8683.00 SFRS9     | 3307.00 | 1.81 | 1.78 |
| 50051.00 H13 | M-012171- L antigen fa | 8270.00 LAGE3     | 3385.00 | 2.87 | 0.72 |
| 50051.00 H14 | M-010552- beclin 1 (cc | 8678.00 BECN1     | 3684.00 | 5.10 | 1.51 |
| 50051.00 H15 | M-007378- solute carri | 8273.00 SLC10A3   | 2945.00 | 3.02 | 0.57 |
| 50051.00 H16 | M-019528- syntaxin 1C  | 8677.00 STX10     | 2831.00 | 2.23 | 1.36 |
| 50051.00 H17 | M-010820- jumonji, AT  | 8284.00 JARID1D   | 2001.00 | 4.80 | 1.21 |
| 50051.00 H18 | M-019469- syntaxin 11  | 8676.00 STX11     | 3411.00 | 1.61 | 1.98 |
| 50051.00 H19 | M-011429- histone clu  | 8290.00 HIST3H3   | 2089.00 | 3.40 | 0.19 |
| 50051.00 H20 | M-019468- syntaxin 16  | 8675.00 STX16     | 2776.00 | 2.27 | 1.32 |
| 50051.00 H21 | M-011430- histone clu  | 8294.00 HIST1H4I  | 4919.00 | 6.30 | 2.71 |
| 50051.00 H23 | M-011435- histone clu  | 8334.00 HIST1H2AC | 2363.00 | 3.98 | 0.39 |
| 50051.00 I02 | M-019556- zinc finger  | 7755.00 ZNF205    | 4404.00 | 3.20 | 0.39 |
| 50051.00 I04 | M-006591- zinc finger  | 7753.00 ZNF202    | 4161.00 | 1.25 | 2.34 |
| 50051.00 I05 | M-020193- UDP glucur   | 7364.00 UGT2B7    | 2325.00 | 1.51 | 2.08 |
| 50051.00 I06 | M-019515- zinc finger  | 7748.00 ZNF195    | 3196.00 | 1.50 | 2.09 |
| 50051.00 I07 | M-009737- UDP glucur   | 7365.00 UGT2B10   | 3170.00 | 2.68 | 0.91 |
| 50051.00 I08 | M-016171- zinc finger  | 7746.00 ZNF193    | 2777.00 | 3.57 | 0.02 |
| 50051.00 I09 | M-020195- UDP glucur   | 7367.00 UGT2B17   | 3069.00 | 3.65 | 0.06 |
| 50051.00 I10 | M-020154- zinc finger  | 7745.00 ZNF192    | 2533.00 | 3.51 | 0.08 |
| 50051.00 I11 | M-019761- uromodulir   | 7369.00 UMOD      | 1848.00 | 4.44 | 0.85 |
| 50051.00 I12 | M-021350- zinc finger  | 7743.00 ZNF189    | 1449.00 | 3.38 | 0.21 |
| 50051.00 I13 | M-019784- uroplakin 2  | 7379.00 UPK2      | 1969.00 | 1.47 | 2.12 |
| 50051.00 I14 | M-016249- zinc finger  | 7741.00 ZNF187    | 1513.00 | 1.72 | 1.87 |
| 50051.00 I15 | M-019707- uroplakin 3  | 7380.00 UPK3A     | 2719.00 | 3.35 | 0.24 |
| 50051.00 I16 | M-019519- zinc finger  | 7739.00 ZNF185    | 1946.00 | 2.36 | 1.23 |
| 50051.00 I17 | M-014140- ubiquitousl  | 7403.00 UTX       | 2286.00 | 3.67 | 0.08 |
| 50051.00 I18 | M-012789- zinc finger  | 7738.00 ZNF184    | 2772.00 | 2.34 | 1.25 |
| 50051.00 I19 | M-017344- ubiquitousl  | 7404.00 UTY       | 2103.00 | 2.43 | 1.16 |
| 50051.00 I20 | M-006590- ring finger  | 7737.00 RNF113A   | 2124.00 | 5.70 | 2.11 |
| 50051.00 I21 | M-009529- valyl-tRNA   | 7407.00 VARS      | 750.00  | 5.20 | 1.61 |
| 50051.00 I23 | M-019763- vasodilator  | 7408.00 VASP      | 2256.00 | 1.60 | 1.99 |
| 50051.00 J02 | M-004241- vesicle-ass  | 8674.00 VAMP4     | 4004.00 | 8.47 | 4.88 |
| 50051.00 J04 | M-004740- tankyrase,   | 8658.00 TNKS      | 2842.00 | 2.96 | 0.63 |
| 50051.00 J05 | M-017596- histone clu  | 8335.00 HIST1H2AB | 1946.00 | 9.10 | 5.51 |
| 50051.00 J06 | M-011904- DEAD (Asp-   | 8653.00 DDX3Y     | 2768.00 | 3.32 | 0.27 |
| 50051.00 J07 | M-011438- histone clu  | 8338.00 HIST2H2AC | 2835.00 | 3.67 | 0.08 |
| 50051.00 J08 | M-011510- chordin      | 8646.00 CHRD      | 2530.00 | 5.34 | 1.75 |

|              |                        |         |           |         |      |      |
|--------------|------------------------|---------|-----------|---------|------|------|
| 50051.00 J09 | M-017307- histone clu  | 8339.00 | HIST1H2BG | 3551.00 | 4.31 | 0.72 |
| 50051.00 J10 | M-006264- potassium    | 8645.00 | KCNK5     | 3410.00 | 4.19 | 0.60 |
| 50051.00 J11 | M-011441- histone clu  | 8342.00 | HIST1H2BN | 2796.00 | 7.69 | 4.10 |
| 50051.00 J12 | M-010143- amine oxid   | 8639.00 | AOC3      | 3566.00 | 5.47 | 1.88 |
| 50051.00 J13 | M-011446- histone clu  | 8347.00 | HIST1H2BC | 2081.00 | 5.19 | 1.60 |
| 50051.00 J14 | M-019536- eukaryotic   | 8637.00 | EIF4EBP3  | 4231.00 | 1.68 | 1.91 |
| 50051.00 J15 | M-011447- histone clu  | 8348.00 | HIST1H2BC | 2145.00 | 2.84 | 0.75 |
| 50051.00 J16 | M-019538- Sjogren's sy | 8636.00 | SSNA1     | 2696.00 | 2.74 | 0.85 |
| 50051.00 J17 | M-011449- histone clu  | 8350.00 | HIST1H3A  | 3033.00 | 2.14 | 1.45 |
| 50051.00 J18 | M-019537- RNA termir   | 8634.00 | RTCD1     | 3899.00 | 5.67 | 2.08 |
| 50051.00 J19 | M-011451- histone clu  | 8352.00 | HIST1H3C  | 2754.00 | 3.92 | 0.33 |
| 50051.00 J20 | M-009280- hydroxyste   | 8630.00 | HSD17B6   | 3013.00 | 3.02 | 0.57 |
| 50051.00 J21 | M-011452- histone clu  | 8353.00 | HIST1H3E  | 2925.00 | 3.25 | 0.34 |
| 50051.00 J23 | M-011453- histone clu  | 8354.00 | HIST1H3I  | 3143.00 | 3.44 | 0.15 |
| 50051.00 K02 | M-006589- zinc finger  | 7733.00 | ZNF180    | 5993.00 | 5.06 | 1.47 |
| 50051.00 K04 | M-006588- zinc finger  | 7732.00 | ZNF179    | 2960.00 | 6.05 | 2.46 |
| 50051.00 K05 | M-008727- valosin-cor  | 7415.00 | VCP       | 3141.00 | 2.77 | 0.82 |
| 50051.00 K06 | M-019774- zinc finger  | 7730.00 | ZNF177    | 3179.00 | 3.81 | 0.22 |
| 50051.00 K07 | M-019764- voltage-dej  | 7416.00 | VDAC1     | 4288.00 | 3.10 | 0.49 |
| 50051.00 K08 | M-021399- zinc finger  | 7728.00 | ZNF175    | 3243.00 | 6.94 | 3.35 |
| 50051.00 K09 | M-019766- voltage-dej  | 7417.00 | VDAC2     | 3422.00 | 3.95 | 0.36 |
| 50051.00 K10 | M-011801- zinc finger  | 7718.00 | ZNF165    | 3352.00 | 4.45 | 0.86 |
| 50051.00 K11 | M-020850- voltage-dej  | 7419.00 | VDAC3     | 2595.00 | 2.93 | 0.66 |
| 50051.00 K12 | M-011800- zinc finger  | 7712.00 | ZNF157    | 1323.00 | 3.78 | 0.19 |
| 50051.00 K13 | M-013570- linker for a | 7462.00 | LAT2      | 2072.00 | 4.92 | 1.33 |
| 50051.00 K14 | M-006586- zinc finger  | 7711.00 | ZNF155    | 1930.00 | 3.73 | 0.14 |
| 50051.00 K15 | M-011898- tryptophan   | 7485.00 | WRB       | 1902.00 | 2.73 | 0.86 |
| 50051.00 K16 | M-023833- zinc finger  | 7710.00 | ZNF154    | 1233.00 | 7.62 | 4.03 |
| 50051.00 K17 | M-012662- splicing fac | 7536.00 | SF1       | 2181.00 | 6.10 | 2.51 |
| 50051.00 K18 | M-006585- tripartite r | 7706.00 | TRIM25    | 1665.00 | 6.49 | 2.90 |
| 50051.00 K19 | M-010789- zinc finger  | 7538.00 | ZFP36     | 2390.00 | 6.99 | 3.40 |
| 50051.00 K20 | M-019930- zinc finger  | 7701.00 | ZNF142    | 1819.00 | 6.27 | 2.68 |
| 50051.00 K21 | M-019375- zinc finger  | 7542.00 | ZFPL1     | 1889.00 | 2.70 | 0.89 |
| 50051.00 K23 | M-014133- zinc finger  | 7549.00 | ZNF2      | 2339.00 | 4.66 | 1.07 |
| 50051.00 L02 | M-011504- jerky homc   | 8629.00 | JRK       | 2029.00 | 0.94 | 2.65 |
| 50051.00 L04 | M-019539- Down synd    | 8624.00 | DSCR2     | 3122.00 | 2.21 | 1.38 |
| 50051.00 L05 | M-011455- histone clu  | 8356.00 | HIST1H3J  | 2391.00 | 1.71 | 1.88 |
| 50051.00 L06 | M-012663- acetylserot  | 8623.00 | ASMTL     | 2044.00 | 1.52 | 2.07 |
| 50051.00 L07 | M-013723- histone clu  | 8357.00 | HIST1H3H  | 2362.00 | 1.14 | 2.45 |
| 50051.00 L08 | M-011502- neuropepti   | 8620.00 | NPFF      | 3084.00 | 2.01 | 1.58 |
| 50051.00 L09 | M-006475- histone clu  | 8358.00 | HIST1H3B  | 3232.00 | 1.02 | 2.57 |
| 50051.00 L10 | M-019218- Ca2+-depei   | 8618.00 | CADPS     | 2437.00 | 1.03 | 2.56 |
| 50051.00 L11 | M-011456- histone clu  | 8359.00 | HIST1H4A  | 3230.00 | 1.83 | 1.76 |
| 50051.00 L12 | M-011501- vesicle doc  | 8615.00 | VDP       | 2560.00 | 2.03 | 1.56 |
| 50051.00 L13 | M-011457- histone clu  | 8360.00 | HIST1H4D  | 2138.00 | 1.68 | 1.91 |
| 50051.00 L14 | M-012616- stanniocalc  | 8614.00 | STC2      | 2580.00 | 5.19 | 1.60 |
| 50051.00 L15 | M-011458- histone clu  | 8361.00 | HIST1H4F  | 2818.00 | 2.56 | 1.04 |

|                     |                              |                       |                |             |             |
|---------------------|------------------------------|-----------------------|----------------|-------------|-------------|
| 50051.00 L16        | M-008311- retinol deh        | 8608.00 RDH16         | 3117.00        | 3.53        | 0.06        |
| 50051.00 L17        | M-011460- histone clu        | 8363.00 HIST1H4J      | 3563.00        | 1.35        | 2.24        |
| 50051.00 L18        | M-007471- solute carri       | 8604.00 SLC25A12      | 2920.00        | 1.68        | 1.91        |
| 50051.00 L19        | M-011462- histone clu        | 8365.00 HIST1H4H      | 3425.00        | 3.21        | 0.38        |
| 50051.00 L20        | M-019541- chromoson          | 8603.00 C4orf8        | 3173.00        | 1.80        | 1.79        |
| 50051.00 L21        | M-011464- histone clu        | 8367.00 HIST1H4E      | 3690.00        | 4.80        | 1.21        |
| 50051.00 L23        | M-011465- histone clu        | 8368.00 HIST1H4L      | 3023.00        | 7.15        | 3.56        |
| 50051.00 M02        | M-019773- zinc finger        | 7700.00 ZNF141        | 5362.00        | 1.75        | 1.84        |
| <b>50051.00 M04</b> | <b>M-021400- zinc finger</b> | <b>7699.00 ZNF140</b> | <b>7308.00</b> | <b>6.60</b> | <b>3.01</b> |
| 50051.00 M05        | M-016190- zinc finger        | 7551.00 ZNF3          | 6770.00        | 4.61        | 1.02        |
| <b>50051.00 M06</b> | <b>M-021278- zinc finger</b> | <b>7697.00 ZNF138</b> | <b>6345.00</b> | <b>6.60</b> | <b>3.01</b> |
| 50051.00 M07        | M-008444- zinc finger        | 7552.00 ZNF711        | 5569.00        | 3.66        | 0.07        |
| 50051.00 M08        | M-019559- zinc finger        | 7696.00 ZNF137        | 5510.00        | 2.34        | 1.25        |
| 50051.00 M09        | M-014124- zinc finger        | 7554.00 ZNF8          | 6101.00        | 1.36        | 2.23        |
| 50051.00 M10        | M-019431- zinc finger        | 7694.00 ZNF135        | 4199.00        | 1.19        | 2.40        |
| 50051.00 M11        | M-012772- zinc finger        | 7558.00 ZNF11B        | 4070.00        | 2.75        | 0.84        |
| 50051.00 M12        | M-019561- zinc finger        | 7693.00 ZNF134        | 3398.00        | 3.83        | 0.24        |
| 50051.00 M13        | M-020805- zinc finger        | 7561.00 ZNF14         | 4755.00        | 2.54        | 1.05        |
| 50051.00 M14        | M-017702- zinc finger        | 7692.00 ZNF133        | 3572.00        | 3.08        | 0.51        |
| 50051.00 M15        | M-012773- zinc finger        | 7564.00 ZNF16         | 1005.00        | 7.76        | 4.17        |
| 50051.00 M16        | M-019560- zinc finger        | 7691.00 ZNF132        | 1591.00        | 2.26        | 1.33        |
| 50051.00 M17        | M-023829- zinc finger        | 7565.00 ZNF17         | 5332.00        | 2.89        | 0.70        |
| 50051.00 M18        | M-006582- makorin, ri        | 7682.00 MKRNP5        | 3150.00        | 3.78        | 0.19        |
| 50051.00 M19        | M-023022- zinc finger        | 7566.00 ZNF18         | 3132.00        | 1.88        | 1.71        |
| 50051.00 M20        | M-006581- makorin, ri        | 7681.00 MKRN3         | 3650.00        | 0.66        | 2.93        |
| 50051.00 M21        | M-006575- zinc finger        | 7567.00 ZNF19         | 3328.00        | 2.79        | 0.80        |
| 50051.00 M23        | M-006576- zinc finger        | 7568.00 ZNF20         | 2795.00        | 3.61        | 0.02        |
| 50051.00 N02        | M-024157- nucleolar p        | 8602.00 NOL14         | 2522.00        | 1.86        | 1.73        |
| 50051.00 N04        | M-012615- lymphocyte         | 8581.00 LY6D          | 3287.00        | 4.11        | 0.52        |
| 50051.00 N05        | M-011466- histone clu        | 8369.00 HIST1H4G      | 3370.00        | 3.59        | 0.00        |
| 50051.00 N06        | M-017405- scavenger r        | 8578.00 SCARF1        | 2764.00        | 1.41        | 2.18        |
| 50051.00 N07        | M-019056- histone clu        | 8370.00 HIST2H4A      | 1601.00        | 4.12        | 0.53        |
| 50051.00 N08        | M-018025- transmemk          | 8577.00 TMEFF1        | 3630.00        | 5.40        | 1.81        |
| 50051.00 N09        | M-013698- hyaluronog         | 8372.00 HYAL3         | 2848.00        | 2.84        | 0.75        |
| 50051.00 N10        | M-015318- ribosomal l        | 8568.00 RRP1          | 2403.00        | 1.83        | 1.76        |
| 50051.00 N11        | M-007470- solute carri       | 8402.00 SLC25A11      | 2775.00        | 1.55        | 2.04        |
| 50051.00 N12        | M-011498- tyrosyl-tRN        | 8565.00 YARS          | 1885.00        | 3.18        | 0.41        |
| 50051.00 N13        | M-019055- SRY (sex de        | 8403.00 SOX14         | 3169.00        | 3.82        | 0.23        |
| 50051.00 N14        | M-009897- kynurenine         | 8564.00 KMO           | 4231.00        | 2.58        | 1.01        |
| 50051.00 N15        | M-017919- speckle-tyr        | 8405.00 SPOP          | 3334.00        | 1.23        | 2.36        |
| 50051.00 N16        | M-015317- THO compl          | 8563.00 THOC5         | 3198.00        | 3.38        | 0.21        |
| 50051.00 N17        | M-004455- ubiquitousl        | 8409.00 UXT           | 2258.00        | 1.06        | 2.53        |
| 50051.00 N18        | M-011495- inactivator        | 8552.00 INE1          | 2820.00        | 1.28        | 2.31        |
| 50051.00 N19        | M-004012- early endo:        | 8411.00 EEA1          | 4592.00        | 1.59        | 2.00        |
| 50051.00 N20        | M-007900- ficolin (coll      | 8547.00 FCN3          | 3359.00        | 0.77        | 2.82        |
| 50051.00 N21        | M-019551- syntaxin 7         | 8417.00 STX7          | 2143.00        | 1.26        | 2.33        |
| 50051.00 N23        | M-011472- butyrobeta         | 8424.00 BBOX1         | 2070.00        | 2.13        | 1.46        |



|              |                        |         |          |         |       |      |
|--------------|------------------------|---------|----------|---------|-------|------|
| 50051.00 O02 | M-020328- zinc finger  | 7673.00 | ZNF222   | 4841.00 | 3.51  | 0.08 |
| 50051.00 O04 | M-014163- zinc finger  | 7670.00 | ZNF117   | 3173.00 | 2.71  | 0.88 |
| 50051.00 O05 | M-024670- zinc finger  | 7569.00 | ZNF182   | 4104.00 | 6.12  | 2.53 |
| 50051.00 O06 | M-019779- zinc finger  | 7644.00 | ZNF91    | 4301.00 | 3.16  | 0.43 |
| 50051.00 O07 | M-016341- zinc finger  | 7571.00 | ZNF23    | 3270.00 | 3.70  | 0.11 |
| 50051.00 O08 | M-024032- zinc finger  | 7643.00 | ZNF90    | 3834.00 | 4.30  | 0.71 |
| 50051.00 O09 | M-021443- zinc finger  | 7574.00 | ZNF26    | 5047.00 | 2.66  | 0.94 |
| 50051.00 O10 | M-006580- zinc finger  | 7638.00 | ZNF221   | 4234.00 | 2.43  | 1.16 |
| 50051.00 O11 | M-023811- zinc finger  | 7576.00 | ZNF28    | 2928.00 | 4.34  | 0.75 |
| 50051.00 O12 | M-019506- zinc finger  | 7634.00 | ZNF80    | 3249.00 | 5.05  | 1.46 |
| 50051.00 O13 | M-015853- zinc finger  | 7579.00 | ZSCAN20  | 1715.00 | 5.25  | 1.66 |
| 50051.00 O14 | M-012792- zinc finger  | 7633.00 | ZNF79    | 3074.00 | 3.77  | 0.18 |
| 50051.00 O15 | M-012775- zinc finger  | 7580.00 | ZNF32    | 3384.00 | 4.67  | 1.08 |
| 50051.00 O16 | M-016925- zinc finger  | 7627.00 | ZNF75A   | 3158.00 | 3.99  | 0.40 |
| 50051.00 O17 | M-025422- zinc finger  | 7586.00 | ZKSCAN1  | 4069.00 | 3.19  | 0.40 |
| 50051.00 O18 | M-012791- zinc finger  | 7626.00 | ZNF75    | 3368.00 | 5.11  | 1.52 |
| 50051.00 O19 | M-026497- zinc finger  | 7587.00 | ZNF37A   | 1916.00 | 9.71  | 6.12 |
| 50051.00 O20 | M-012790- zinc finger  | 7621.00 | ZNF70    | 2433.00 | 4.19  | 0.60 |
| 50051.00 O21 | M-021316- zinc finger  | 7589.00 | ZSCAN21  | 2721.00 | 4.89  | 1.30 |
| 50051.00 O23 | M-012388- zinc finger  | 7592.00 | ZNF41    | 1795.00 | 5.68  | 2.09 |
| 50051.00 P02 | M-008967- carbohydrate | 8534.00 | CHST1    | 2031.00 | 5.32  | 1.73 |
| 50051.00 P04 | M-009121- cytochrome   | 8529.00 | CYP4F2   | 3188.00 | 4.17  | 0.58 |
| 50051.00 P05 | M-011473- zinc finger  | 8427.00 | ZNF282   | 2720.00 | 4.56  | 0.97 |
| 50051.00 P06 | M-009311- D-aspartate  | 8528.00 | DDO      | 3107.00 | 2.48  | 1.11 |
| 50051.00 P07 | M-011475- double C2-   | 8447.00 | DOC2B    | 2808.00 | 2.17  | 1.42 |
| 50051.00 P08 | M-008757- N-deacetyl   | 8509.00 | NDST2    | 2551.00 | 7.17  | 3.58 |
| 50051.00 P09 | M-011476- double C2-   | 8448.00 | DOC2A    | 3004.00 | 4.76  | 1.17 |
| 50051.00 P10 | M-011489- nipsnap ho   | 8508.00 | NIPSNAP1 | 2988.00 | 2.78  | 0.81 |
| 50051.00 P11 | M-012403- attractin    | 8455.00 | ATRNL1   | 2728.00 | 5.35  | 1.76 |
| 50051.00 P12 | M-011488- poly (ADP-ri | 8505.00 | PARG     | 1174.00 | 5.79  | 2.20 |
| 50051.00 P13 | M-010386- tyrosylprot  | 8459.00 | TPST2    | 2352.00 | 1.23  | 2.36 |
| 50051.00 P14 | M-011483- PTPRF inte   | 8496.00 | PPFIBP1  | 2792.00 | 3.83  | 0.24 |
| 50051.00 P15 | M-008839- tyrosylprot  | 8460.00 | TPST1    | 1646.00 | 3.52  | 0.07 |
| 50051.00 P16 | M-026771- PTPRF inte   | 8495.00 | PPFIBP2  | 2569.00 | 1.99  | 1.60 |
| 50051.00 P17 | M-012611- TEA domain   | 8463.00 | TEAD2    | 3511.00 | 3.82  | 0.23 |
| 50051.00 P18 | M-006010- protease, s  | 8492.00 | PRSS12   | 2761.00 | 8.55  | 4.96 |
| 50051.00 P19 | M-011479- sorbin and   | 8470.00 | SORBS2   | 4035.00 | 1.36  | 2.23 |
| 50051.00 P20 | M-008295- cartilage in | 8483.00 | CILP     | 3197.00 | 1.85  | 1.74 |
| 50051.00 P21 | M-011482- RAE1 RNA c   | 8480.00 | RAE1     | 1409.00 | 1.92  | 1.67 |
| 50051.00 P23 | M-021276- semaphori    | 8482.00 | SEMA7A   | 1938.00 | 1.24  | 2.35 |
|              |                        |         |          | 2784.50 | 3.59  | 1.19 |
|              |                        |         | MAD3     |         |       | 3.57 |
|              |                        |         | MADc     |         |       | 1.76 |
| 50051.00 C22 |                        |         |          | 2099.00 | 20.39 |      |
| 50051.00 D22 |                        | 2242.00 | 12.89    |         |       |      |
| 50051.00 E22 |                        | 1694.00 | 12.63    |         |       |      |
| 50051.00 F22 |                        |         |          | 2827.00 | 25.82 |      |



|              |                                   |                   |         |       |
|--------------|-----------------------------------|-------------------|---------|-------|
|              |                                   | mn                | 2463.00 | 23.11 |
|              |                                   | sd                | 514.77  | 3.84  |
| 50051.00 G22 |                                   |                   | 939.00  | 11.93 |
| 50051.00 H22 |                                   |                   | 1127.00 | 3.99  |
| 50051.00 I22 |                                   |                   | 554.00  | 16.25 |
| 50051.00 J22 |                                   |                   | 1052.00 | 11.41 |
|              |                                   | mn                | 911.00  | 10.55 |
|              |                                   | sd                | 311.44  | 6.17  |
|              |                                   | 3psSD             |         | 11.52 |
|              |                                   | 3ngSD             |         | 18.51 |
|              |                                   | SumSD             |         | 30.03 |
|              |                                   | DiffMn            |         | 12.56 |
|              |                                   | SmovrDiff         |         | 2.39  |
|              |                                   | 1minus            |         | -1.39 |
| 50051.00 G03 | M-003290- polo-like ki            | 5347.00 PLK1 SMAR | 234.00  | 27.78 |
| 50051.00 H03 | M-003290- polo-like ki            | 5347.00 PLK1 SMAR | 157.00  | 20.38 |
| 50051.00 I03 | D-001206- siControl non-targetin  |                   | 2373.00 | 3.58  |
| 50051.00 J03 | D-001206- siControl non-targetin  |                   | 1649.00 | 4.85  |
| 50051.00 K03 | D-001600- ( siGLO RISC-free siRNA |                   | 7776.00 | 6.78  |
| 50051.00 L03 | D-001600- ( siGLO RISC-free siRNA |                   | 4269.00 | 5.22  |

| rZ    | Cell Count | % inf | Abs Dev | rZ   | Cell Count | % inf | Abs Dev | rZ    |
|-------|------------|-------|---------|------|------------|-------|---------|-------|
| -0.57 | 814.00     | 3.93  | 1.13    | 0.73 | 872.00     | 1.38  | 2.26    | -1.27 |
| 2.96  | 3258.00    | 3.47  | 0.67    | 0.43 | 2454.00    | 6.48  | 2.84    | 1.60  |
| -0.30 | 3554.00    | 1.07  | 1.73    | 1.11 | 2547.00    | 1.61  | 2.03    | -1.14 |
| 0.20  | 3669.00    | 1.94  | 0.86    | 0.55 | 1707.00    | 2.64  | 1.00    | -0.56 |
| 4.68  | 2615.00    | 2.72  | 0.08    | 0.05 | 1246.00    | 2.73  | 0.91    | -0.51 |
| 0.38  | 1238.00    | 2.18  | 0.62    | 0.40 | 2327.00    | 2.45  | 1.19    | -0.67 |
| 3.47  | 1021.00    | 4.60  | 1.80    | 1.16 | 883.00     | 5.78  | 2.14    | 1.20  |
| 2.66  | 3270.00    | 4.53  | 1.73    | 1.11 | 2268.00    | 5.51  | 1.87    | 1.05  |
| 0.05  | 2174.00    | 1.75  | 1.05    | 0.67 | 1359.00    | 1.84  | 1.80    | -1.01 |
| 0.57  | 2560.00    | 3.24  | 0.44    | 0.28 | 2553.00    | 3.45  | 0.19    | -0.11 |
| 0.67  | 1997.00    | 1.45  | 1.35    | 0.86 | 1884.00    | 2.81  | 0.83    | -0.47 |
| 0.24  | 2214.00    | 1.85  | 0.95    | 0.61 | 2137.00    | 4.26  | 0.62    | 0.35  |
| 1.88  | 2694.00    | 3.34  | 0.54    | 0.35 | 1833.00    | 3.82  | 0.18    | 0.10  |
| 1.58  | 1667.00    | 2.34  | 0.46    | 0.30 | 1287.00    | 2.95  | 0.69    | -0.39 |
| -0.88 | 1539.00    | 2.08  | 0.72    | 0.46 | 1191.00    | 3.78  | 0.14    | 0.08  |
| -0.56 | 2773.00    | 1.77  | 1.03    | 0.66 | 1594.00    | 3.39  | 0.25    | -0.14 |
| 4.99  | 865.00     | 9.71  | 6.91    | 4.43 | 739.00     | 4.74  | 1.10    | 0.62  |
| -0.62 | 1860.00    | 3.49  | 0.69    | 0.45 | 2593.00    | 2.28  | 1.36    | -0.77 |
| 1.22  | 690.00     | 4.64  | 1.84    | 1.18 | 1120.00    | 3.13  | 0.52    | -0.29 |
| -0.40 | 2052.00    | 5.46  | 2.66    | 1.70 | 2436.00    | 4.47  | 0.83    | 0.47  |
| -0.12 | 1729.00    | 2.95  | 0.15    | 0.10 | 2294.00    | 0.61  | 3.03    | -1.70 |
| 1.15  | 4072.00    | 1.72  | 1.08    | 0.69 | 3343.00    | 2.90  | 0.74    | -0.42 |
| -0.57 | 4775.00    | 2.07  | 0.73    | 0.47 | 3765.00    | 2.71  | 0.93    | -0.52 |
| -1.03 | 4727.00    | 5.48  | 2.68    | 1.72 | 3105.00    | 3.22  | 0.42    | -0.24 |
| -0.21 | 4582.00    | 11.59 | 8.79    | 5.63 | 2543.00    | 6.65  | 3.01    | 1.69  |
| 1.88  | 1628.00    | 4.36  | 1.56    | 1.00 | 949.00     | 3.27  | 0.37    | -0.21 |
| -0.70 | 3824.00    | 1.52  | 1.28    | 0.82 | 1786.00    | 2.74  | 0.90    | -0.50 |
| 0.01  | 3655.00    | 2.82  | 0.02    | 0.01 | 1279.00    | 2.35  | 1.29    | -0.73 |
| -0.07 | 3774.00    | 2.38  | 0.42    | 0.27 | 2888.00    | 2.46  | 1.18    | -0.66 |
| -0.55 | 2114.00    | 3.74  | 0.94    | 0.60 | 1105.00    | 2.17  | 1.47    | -0.83 |
| -1.22 | 4179.00    | 3.33  | 0.53    | 0.34 | 3297.00    | 4.61  | 0.97    | 0.54  |
| 0.48  | 3072.00    | 5.66  | 2.86    | 1.84 | 2018.00    | 8.28  | 4.64    | 2.60  |
| 0.09  | 2331.00    | 4.33  | 1.53    | 0.98 | 1017.00    | 2.26  | 1.38    | -0.78 |
| -0.27 | 4866.00    | 5.61  | 2.81    | 1.80 | 3305.00    | 3.48  | 0.16    | -0.09 |
| -0.45 | 3265.00    | 6.16  | 3.36    | 2.15 | 1897.00    | 2.69  | 0.95    | -0.54 |
| 1.07  | 3829.00    | 5.54  | 2.74    | 1.75 | 2070.00    | 3.48  | 0.16    | -0.09 |
| -0.38 | 4284.00    | 3.03  | 0.23    | 0.15 | 3386.00    | 1.98  | 1.66    | -0.93 |
| -0.99 | 3383.00    | 3.99  | 1.19    | 0.76 | 2590.00    | 2.28  | 1.36    | -0.77 |
| -0.73 | 3597.00    | 3.70  | 0.90    | 0.58 | 2978.00    | 1.41  | 2.23    | -1.25 |
| -0.23 | 4912.00    | 8.39  | 5.59    | 3.58 | 3359.00    | 4.53  | 0.89    | 0.50  |
| 0.02  | 3955.00    | 4.42  | 1.62    | 1.04 | 3472.00    | 3.97  | 0.33    | 0.19  |
| 0.39  | 2867.00    | 2.13  | 0.67    | 0.43 | 2095.00    | 4.63  | 0.99    | 0.56  |
| 2.86  | 4065.00    | 4.82  | 2.02    | 1.30 | 4134.00    | 10.18 | 6.54    | 3.68  |
| 0.15  | 3557.00    | 3.77  | 0.97    | 0.62 | 2463.00    | 3.29  | 0.35    | -0.20 |
| -0.07 | 5181.00    | 3.17  | 0.37    | 0.23 | 2295.00    | 2.79  | 0.85    | -0.48 |
| 9.17  | 3210.00    | 3.24  | 0.44    | 0.28 | 4161.00    | 5.17  | 1.53    | 0.86  |

|       |         |       |       |       |         |       |       |       |
|-------|---------|-------|-------|-------|---------|-------|-------|-------|
| 0.09  | 4255.00 | 1.86  | 0.94  | 0.60  | 3004.00 | 4.29  | 0.65  | 0.37  |
| 0.66  | 3336.00 | 2.46  | 0.34  | 0.22  | 2543.00 | 1.85  | 1.79  | -1.01 |
| 0.75  | 3951.00 | 1.11  | 1.69  | 1.08  | 2550.00 | 3.76  | 0.12  | 0.07  |
| 0.63  | 1900.00 | 1.79  | 1.01  | 0.65  | 1876.00 | 4.42  | 0.78  | 0.44  |
| 2.12  | 1435.00 | 5.09  | 2.29  | 1.47  | 1361.00 | 4.63  | 0.99  | 0.56  |
| 0.38  | 3607.00 | 1.36  | 1.44  | 0.92  | 2340.00 | 5.85  | 2.21  | 1.24  |
| 1.91  | 2126.00 | 1.22  | 1.58  | 1.01  | 1447.00 | 9.19  | 5.55  | 3.12  |
| 0.78  | 2836.00 | 3.24  | 0.44  | 0.28  | 2300.00 | 6.30  | 2.66  | 1.50  |
| 0.98  | 3469.00 | 4.18  | 1.38  | 0.88  | 2940.00 | 5.14  | 1.50  | 0.84  |
| -0.48 | 3735.00 | 1.07  | 1.73  | 1.11  | 3251.00 | 6.31  | 2.67  | 1.50  |
| 0.03  | 3707.00 | 1.97  | 0.83  | 0.53  | 4478.00 | 7.17  | 3.53  | 1.98  |
| 0.48  | 4068.00 | 1.70  | 1.10  | 0.71  | 4441.00 | 3.33  | 0.31  | -0.17 |
| 0.48  | 1642.00 | 2.13  | 0.67  | 0.43  | 4204.00 | 4.33  | 0.69  | 0.39  |
| 2.18  | 2050.00 | 0.83  | 1.97  | 1.26  | 2019.00 | 2.18  | 1.46  | -0.82 |
| -1.63 | 2799.00 | 2.75  | 0.05  | 0.03  | 3146.00 | 6.04  | 2.40  | 1.35  |
| 3.77  | 627.00  | 22.97 | 20.17 | 12.93 | 568.00  | 14.09 | 10.45 | 5.87  |
| -1.30 | 3652.00 | 2.00  | 0.80  | 0.51  | 3465.00 | 1.47  | 2.17  | -1.22 |
| -0.99 | 2698.00 | 3.93  | 1.13  | 0.72  | 2635.00 | 2.47  | 1.17  | -0.66 |
| -0.89 | 4584.00 | 4.60  | 1.80  | 1.16  | 2879.00 | 4.72  | 1.08  | 0.61  |
| -0.76 | 2453.00 | 2.85  | 0.05  | 0.03  | 2913.00 | 3.67  | 0.03  | 0.02  |
| 0.34  | 4566.00 | 5.23  | 2.43  | 1.56  | 4937.00 | 6.02  | 2.38  | 1.33  |
| -0.74 | 4391.00 | 5.92  | 3.12  | 2.00  | 3601.00 | 4.33  | 0.69  | 0.39  |
| 0.24  | 2759.00 | 3.99  | 1.19  | 0.76  | 2078.00 | 1.59  | 2.05  | -1.15 |
| 0.48  | 3615.00 | 3.82  | 1.02  | 0.65  | 2580.00 | 2.52  | 1.12  | -0.63 |
| 0.19  | 3237.00 | 2.78  | 0.02  | 0.01  | 2404.00 | 1.33  | 2.31  | -1.30 |
| -0.81 | 2341.00 | 3.29  | 0.49  | 0.31  | 1026.00 | 2.05  | 1.59  | -0.90 |
| 0.72  | 2307.00 | 3.34  | 0.54  | 0.34  | 2313.00 | 0.26  | 3.38  | -1.90 |
| -1.26 | 3759.00 | 2.98  | 0.18  | 0.12  | 2379.00 | 1.60  | 2.04  | -1.15 |
| -0.78 | 3310.00 | 1.54  | 1.26  | 0.81  | 1547.00 | 1.49  | 2.15  | -1.21 |
| -0.26 | 4066.00 | 4.82  | 2.02  | 1.30  | 3041.00 | 1.97  | 1.67  | -0.94 |
| -0.02 | 2985.00 | 7.91  | 5.11  | 3.27  | 3073.00 | 1.43  | 2.21  | -1.24 |
| -0.47 | 2642.00 | 4.43  | 1.63  | 1.04  | 2774.00 | 1.01  | 2.63  | -1.48 |
| -0.40 | 2895.00 | 3.80  | 1.00  | 0.64  | 2987.00 | 2.24  | 1.40  | -0.79 |
| -1.64 | 2698.00 | 1.63  | 1.17  | 0.75  | 5003.00 | 1.66  | 1.98  | -1.11 |
| -1.25 | 4194.00 | 4.08  | 1.28  | 0.82  | 2949.00 | 4.41  | 0.77  | 0.43  |
| 3.08  | 3826.00 | 4.76  | 1.96  | 1.25  | 2387.00 | 4.57  | 0.93  | 0.52  |
| -0.64 | 3392.00 | 2.86  | 0.06  | 0.04  | 2490.00 | 1.08  | 2.56  | -1.44 |
| 1.47  | 4741.00 | 8.86  | 6.06  | 3.88  | 2207.00 | 2.76  | 0.88  | -0.49 |
| -0.51 | 2305.00 | 3.64  | 0.84  | 0.54  | 2030.00 | 1.53  | 2.11  | -1.19 |
| 0.27  | 3055.00 | 1.80  | 1.00  | 0.64  | 2854.00 | 1.82  | 1.82  | -1.02 |
| 0.81  | 1675.00 | 3.46  | 0.66  | 0.42  | 1719.00 | 1.11  | 2.53  | -1.43 |
| 0.46  | 4814.00 | 6.19  | 3.39  | 2.17  | 4290.00 | 2.87  | 0.77  | -0.43 |
| 0.38  | 3867.00 | 6.26  | 3.46  | 2.22  | 3314.00 | 4.98  | 1.34  | 0.75  |
| 0.29  | 2936.00 | 6.54  | 3.74  | 2.40  | 1514.00 | 3.70  | 0.06  | 0.03  |
| 0.16  | 1951.00 | 2.97  | 0.17  | 0.11  | 1746.00 | 1.72  | 1.92  | -1.08 |
| 1.19  | 1610.00 | 3.73  | 0.93  | 0.59  | 1662.00 | 3.85  | 0.21  | 0.12  |
| 2.97  | 1017.00 | 8.65  | 5.85  | 3.75  | 824.00  | 5.70  | 2.06  | 1.16  |

|       |         |       |      |      |         |       |      |       |
|-------|---------|-------|------|------|---------|-------|------|-------|
| -0.03 | 2786.00 | 1.58  | 1.22 | 0.78 | 2239.00 | 2.01  | 1.63 | -0.92 |
| 0.39  | 2771.00 | 3.36  | 0.56 | 0.36 | 2657.00 | 2.97  | 0.67 | -0.38 |
| 0.43  | 3143.00 | 4.45  | 1.65 | 1.06 | 3742.00 | 2.91  | 0.73 | -0.41 |
| -1.04 | 2469.00 | 3.12  | 0.32 | 0.20 | 2174.00 | 3.63  | 0.01 | 0.00  |
| 0.25  | 1025.00 | 3.02  | 0.22 | 0.14 | 1687.00 | 3.91  | 0.27 | 0.15  |
| -0.82 | 2397.00 | 1.54  | 1.26 | 0.81 | 3212.00 | 2.34  | 1.31 | -0.73 |
| -0.89 | 2236.00 | 3.00  | 0.20 | 0.13 | 3153.00 | 5.01  | 1.37 | 0.77  |
| -0.60 | 4227.00 | 2.08  | 0.72 | 0.46 | 5107.00 | 4.13  | 0.49 | 0.28  |
| 1.10  | 5131.00 | 11.15 | 8.35 | 5.35 | 4002.00 | 7.92  | 4.28 | 2.41  |
| -0.60 | 3266.00 | 2.17  | 0.63 | 0.40 | 2806.00 | 2.60  | 1.04 | -0.58 |
| -0.73 | 3637.00 | 3.99  | 1.19 | 0.76 | 2964.00 | 3.71  | 0.07 | 0.04  |
| 0.37  | 5612.00 | 3.99  | 1.19 | 0.76 | 5021.00 | 6.51  | 2.87 | 1.61  |
| 1.16  | 4572.00 | 8.07  | 5.27 | 3.38 | 3072.00 | 4.65  | 1.01 | 0.57  |
| 0.65  | 2288.00 | 1.57  | 1.23 | 0.79 | 1641.00 | 2.19  | 1.45 | -0.81 |
| -0.54 | 4805.00 | 2.98  | 0.18 | 0.11 | 3221.00 | 4.66  | 1.02 | 0.57  |
| 0.21  | 4100.00 | 2.98  | 0.18 | 0.11 | 3591.00 | 4.37  | 0.73 | 0.41  |
| 0.11  | 3426.00 | 2.74  | 0.06 | 0.04 | 2755.00 | 4.76  | 1.12 | 0.63  |
| -0.40 | 2195.00 | 3.60  | 0.80 | 0.51 | 2261.00 | 2.52  | 1.12 | -0.63 |
| 0.50  | 2895.00 | 2.07  | 0.73 | 0.47 | 2460.00 | 5.37  | 1.73 | 0.97  |
| 0.37  | 1753.00 | 4.62  | 1.82 | 1.17 | 1869.00 | 3.75  | 0.11 | 0.06  |
| 0.25  | 3377.00 | 4.35  | 1.55 | 1.00 | 2179.00 | 5.09  | 1.45 | 0.82  |
| -1.24 | 2395.00 | 1.92  | 0.88 | 0.56 | 2444.00 | 1.96  | 1.68 | -0.94 |
| -0.80 | 2637.00 | 1.63  | 1.17 | 0.75 | 2298.00 | 2.74  | 0.90 | -0.51 |
| 0.00  | 3853.00 | 2.08  | 0.72 | 0.46 | 3243.00 | 3.36  | 0.28 | -0.16 |
| -0.53 | 2555.00 | 2.31  | 0.49 | 0.31 | 3565.00 | 4.46  | 0.82 | 0.46  |
| -1.19 | 2099.00 | 2.43  | 0.37 | 0.24 | 2751.00 | 3.89  | 0.25 | 0.14  |
| -0.27 | 1722.00 | 3.43  | 0.63 | 0.40 | 2810.00 | 3.24  | 0.40 | -0.23 |
| 0.41  | 2813.00 | 2.42  | 0.38 | 0.25 | 2265.00 | 4.06  | 0.42 | 0.24  |
| 3.91  | 4810.00 | 10.89 | 8.09 | 5.19 | 4453.00 | 10.80 | 7.16 | 4.02  |
| 0.13  | 2515.00 | 6.04  | 3.24 | 2.08 | 1711.00 | 5.73  | 2.09 | 1.17  |
| -0.19 | 3559.00 | 2.87  | 0.07 | 0.04 | 3145.00 | 4.26  | 0.62 | 0.35  |
| 2.15  | 2186.00 | 5.76  | 2.96 | 1.90 | 1599.00 | 12.13 | 8.49 | 4.77  |
| 1.13  | 3367.00 | 4.28  | 1.48 | 0.95 | 2298.00 | 2.61  | 1.03 | -0.58 |
| 0.69  | 4429.00 | 2.21  | 0.59 | 0.38 | 3080.00 | 4.22  | 0.58 | 0.33  |
| 0.94  | 2775.00 | 3.71  | 0.91 | 0.58 | 1723.00 | 4.24  | 0.60 | 0.33  |
| 0.60  | 1884.00 | 2.34  | 0.46 | 0.30 | 1117.00 | 3.76  | 0.12 | 0.07  |
| 1.19  | 3858.00 | 4.82  | 2.02 | 1.30 | 3393.00 | 6.07  | 2.43 | 1.37  |
| 0.92  | 1871.00 | 0.91  | 1.89 | 1.21 | 1739.00 | 5.46  | 1.82 | 1.02  |
| -0.27 | 3360.00 | 1.22  | 1.58 | 1.01 | 2784.00 | 4.63  | 0.99 | 0.56  |
| 0.01  | 3505.00 | 2.31  | 0.49 | 0.31 | 3289.00 | 6.29  | 2.65 | 1.49  |
| -0.44 | 3075.00 | 1.50  | 1.30 | 0.84 | 3493.00 | 8.07  | 4.43 | 2.49  |
| -0.34 | 3179.00 | 2.11  | 0.69 | 0.44 | 2659.00 | 2.56  | 1.08 | -0.61 |
| 2.87  | 3120.00 | 4.90  | 2.10 | 1.35 | 2566.00 | 9.08  | 5.44 | 3.06  |
| 1.06  | 3710.00 | 2.53  | 0.27 | 0.17 | 3912.00 | 4.81  | 1.17 | 0.65  |
| 1.29  | 1614.00 | 1.86  | 0.94 | 0.60 | 2236.00 | 6.98  | 3.34 | 1.87  |
| 0.80  | 3710.00 | 2.59  | 0.21 | 0.14 | 5114.00 | 5.89  | 2.25 | 1.26  |

|       |         |      |      |      |         |      |      |       |
|-------|---------|------|------|------|---------|------|------|-------|
| 1.11  | 1147.00 | 1.05 | 1.75 | 1.12 | 1409.00 | 6.74 | 3.10 | 1.74  |
| -1.21 | 3639.00 | 0.55 | 2.25 | 1.44 | 4468.00 | 1.59 | 2.05 | -1.15 |
| -0.86 | 3984.00 | 2.81 | 0.01 | 0.01 | 4119.00 | 1.82 | 1.82 | -1.02 |
| -0.63 | 2866.00 | 2.09 | 0.71 | 0.45 | 3115.00 | 4.04 | 0.40 | 0.23  |
| -0.39 | 3599.00 | 1.64 | 1.16 | 0.74 | 2836.00 | 3.77 | 0.13 | 0.07  |
| 0.01  | 2823.00 | 0.53 | 2.27 | 1.45 | 1860.00 | 2.15 | 1.49 | -0.84 |
| 0.76  | 1665.00 | 1.50 | 1.30 | 0.83 | 1882.00 | 2.71 | 0.93 | -0.52 |
| 0.28  | 3844.00 | 1.07 | 1.73 | 1.11 | 3417.00 | 1.58 | 2.06 | -1.16 |
| -0.54 | 2920.00 | 1.71 | 1.09 | 0.70 | 2318.00 | 2.63 | 1.01 | -0.57 |
| -0.46 | 2970.00 | 0.91 | 1.89 | 1.21 | 3443.00 | 1.60 | 2.04 | -1.15 |
| -1.01 | 2989.00 | 0.64 | 2.16 | 1.39 | 1941.00 | 3.09 | 0.55 | -0.31 |
| -0.41 | 3470.00 | 1.24 | 1.56 | 1.00 | 2715.00 | 2.58 | 1.06 | -0.60 |
| 0.86  | 3652.00 | 2.74 | 0.06 | 0.04 | 4036.00 | 3.59 | 0.05 | -0.03 |
| -0.32 | 2571.00 | 1.28 | 1.52 | 0.97 | 1888.00 | 1.75 | 1.89 | -1.06 |
| -0.77 | 2124.00 | 0.19 | 2.61 | 1.67 | 1854.00 | 2.27 | 1.37 | -0.77 |
| 0.69  | 2289.00 | 0.52 | 2.28 | 1.46 | 1376.00 | 1.82 | 1.82 | -1.03 |
| -1.12 | 3753.00 | 0.53 | 2.27 | 1.45 | 3594.00 | 4.84 | 1.20 | 0.67  |
| -0.11 | 2290.00 | 0.22 | 2.58 | 1.65 | 2142.00 | 0.89 | 2.75 | -1.55 |
| -0.75 | 2424.00 | 0.00 | 2.80 | 1.79 | 2044.00 | 2.30 | 1.34 | -0.75 |
| 1.54  | 3335.00 | 3.78 | 0.98 | 0.63 | 3420.00 | 5.67 | 2.03 | 1.14  |
| 0.22  | 2808.00 | 0.36 | 2.44 | 1.57 | 3066.00 | 1.34 | 2.30 | -1.29 |
| -0.22 | 2483.00 | 4.23 | 1.43 | 0.92 | 2440.00 | 3.44 | 0.20 | -0.11 |
| -1.33 | 3572.00 | 3.00 | 0.20 | 0.13 | 2657.00 | 1.81 | 1.83 | -1.03 |
| -1.18 | 2447.00 | 1.55 | 1.25 | 0.80 | 1792.00 | 3.24 | 0.40 | -0.23 |
| -1.19 | 2441.00 | 3.07 | 0.27 | 0.17 | 2347.00 | 1.11 | 2.53 | -1.42 |
| -0.52 | 3231.00 | 2.26 | 0.54 | 0.35 | 2554.00 | 1.76 | 1.88 | -1.06 |
| -0.01 | 2253.00 | 3.91 | 1.11 | 0.71 | 1551.00 | 5.09 | 1.45 | 0.82  |
| 0.03  | 2694.00 | 5.68 | 2.88 | 1.85 | 1997.00 | 2.75 | 0.89 | -0.50 |
| -0.04 | 3214.00 | 3.30 | 0.50 | 0.32 | 2132.00 | 3.38 | 0.26 | -0.15 |
| 0.48  | 2531.00 | 4.31 | 1.51 | 0.97 | 1590.00 | 3.65 | 0.01 | 0.00  |
| -0.12 | 1522.00 | 4.73 | 1.93 | 1.24 | 898.00  | 4.01 | 0.37 | 0.21  |
| -1.20 | 2177.00 | 1.56 | 1.24 | 0.79 | 1014.00 | 3.85 | 0.21 | 0.12  |
| -1.06 | 1689.00 | 3.67 | 0.87 | 0.56 | 1309.00 | 3.36 | 0.28 | -0.16 |
| -0.14 | 3524.00 | 3.15 | 0.35 | 0.22 | 1927.00 | 5.14 | 1.50 | 0.84  |
| -0.70 | 2718.00 | 2.54 | 0.26 | 0.17 | 1860.00 | 2.37 | 1.27 | -0.72 |
| 0.05  | 2594.00 | 2.08 | 0.72 | 0.46 | 1495.00 | 3.08 | 0.56 | -0.32 |
| -0.71 | 3412.00 | 3.55 | 0.75 | 0.48 | 2121.00 | 1.98 | 1.66 | -0.93 |
| -0.66 | 3182.00 | 1.82 | 0.98 | 0.63 | 1560.00 | 3.40 | 0.24 | -0.14 |
| 1.20  | 3983.00 | 1.78 | 1.02 | 0.65 | 2398.00 | 5.55 | 1.91 | 1.07  |
| 0.91  | 909.00  | 1.76 | 1.04 | 0.67 | 697.00  | 4.88 | 1.24 | 0.70  |
| -1.13 | 3522.00 | 0.97 | 1.83 | 1.18 | 3959.00 | 4.85 | 1.21 | 0.68  |
| 2.77  | 3492.00 | 3.61 | 0.81 | 0.52 | 3377.00 | 3.17 | 0.47 | -0.27 |
| -0.36 | 3778.00 | 4.53 | 1.73 | 1.11 | 2787.00 | 2.55 | 1.09 | -0.61 |
| 3.12  | 2560.00 | 5.86 | 3.06 | 1.96 | 2340.00 | 2.86 | 0.78 | -0.44 |
| -0.15 | 2778.00 | 1.80 | 1.00 | 0.64 | 3180.00 | 1.57 | 2.07 | -1.16 |
| 0.04  | 2624.00 | 3.05 | 0.25 | 0.16 | 2120.00 | 2.26 | 1.38 | -0.77 |
| 0.99  | 2202.00 | 1.54 | 1.26 | 0.81 | 2283.00 | 3.77 | 0.13 | 0.07  |

|       |         |      |      |      |         |       |      |       |
|-------|---------|------|------|------|---------|-------|------|-------|
| 0.41  | 1718.00 | 3.03 | 0.23 | 0.15 | 2247.00 | 2.89  | 0.75 | -0.42 |
| 0.34  | 2194.00 | 2.69 | 0.11 | 0.07 | 2965.00 | 3.41  | 0.23 | -0.13 |
| 2.33  | 1516.00 | 3.50 | 0.70 | 0.45 | 1889.00 | 4.76  | 1.12 | 0.63  |
| 1.07  | 1791.00 | 4.97 | 2.17 | 1.39 | 2201.00 | 6.91  | 3.27 | 1.84  |
| 0.91  | 2029.00 | 3.06 | 0.26 | 0.16 | 1550.00 | 4.97  | 1.33 | 0.75  |
| -1.09 | 2275.00 | 2.24 | 0.56 | 0.36 | 2118.00 | 4.86  | 1.22 | 0.69  |
| -0.42 | 910.00  | 1.54 | 1.26 | 0.81 | 1424.00 | 4.78  | 1.14 | 0.64  |
| -0.48 | 1352.00 | 1.63 | 1.17 | 0.75 | 1448.00 | 4.07  | 0.43 | 0.24  |
| -0.82 | 1410.00 | 0.99 | 1.81 | 1.16 | 1304.00 | 4.60  | 0.96 | 0.54  |
| 1.18  | 2188.00 | 4.62 | 1.82 | 1.16 | 2991.00 | 5.22  | 1.58 | 0.89  |
| 0.19  | 1742.00 | 2.18 | 0.62 | 0.40 | 2805.00 | 3.07  | 0.57 | -0.32 |
| -0.32 | 2335.00 | 3.90 | 1.10 | 0.70 | 2518.00 | 1.55  | 2.09 | -1.18 |
| -0.19 | 2423.00 | 2.44 | 0.37 | 0.23 | 2891.00 | 3.77  | 0.13 | 0.07  |
| -0.09 | 1386.00 | 1.23 | 1.57 | 1.01 | 3955.00 | 5.16  | 1.52 | 0.85  |
| 0.83  | 3125.00 | 4.45 | 1.65 | 1.06 | 3696.00 | 4.71  | 1.07 | 0.60  |
| 1.39  | 1475.00 | 3.19 | 0.39 | 0.25 | 1911.00 | 7.59  | 3.95 | 2.22  |
| -0.47 | 1793.00 | 4.18 | 1.38 | 0.89 | 3002.00 | 2.66  | 0.98 | -0.55 |
| 0.12  | 2519.00 | 2.26 | 0.54 | 0.34 | 4172.00 | 4.51  | 0.87 | 0.49  |
| -0.28 | 3316.00 | 3.86 | 1.06 | 0.68 | 4398.00 | 4.84  | 1.20 | 0.68  |
| 1.90  | 2049.00 | 2.59 | 0.21 | 0.14 | 3576.00 | 4.33  | 0.69 | 0.39  |
| 0.20  | 1340.00 | 0.97 | 1.83 | 1.17 | 2632.00 | 4.18  | 0.54 | 0.30  |
| 0.48  | 2730.00 | 0.95 | 1.85 | 1.18 | 3832.00 | 3.58  | 0.06 | -0.04 |
| -0.38 | 1215.00 | 0.82 | 1.98 | 1.27 | 2026.00 | 1.97  | 1.67 | -0.94 |
| 0.11  | 977.00  | 1.43 | 1.37 | 0.88 | 1475.00 | 4.07  | 0.43 | 0.24  |
| 0.76  | 1425.00 | 1.82 | 0.98 | 0.63 | 1716.00 | 3.38  | 0.26 | -0.15 |
| 0.08  | 1538.00 | 1.69 | 1.11 | 0.71 | 2032.00 | 6.20  | 2.56 | 1.44  |
| -0.49 | 1213.00 | 1.24 | 1.56 | 1.00 | 2073.00 | 3.38  | 0.26 | -0.15 |
| 2.29  | 1545.00 | 0.45 | 2.35 | 1.50 | 1473.00 | 5.36  | 1.72 | 0.97  |
| 1.42  | 1545.00 | 1.62 | 1.18 | 0.76 | 2495.00 | 2.93  | 0.71 | -0.40 |
| 1.64  | 1245.00 | 0.72 | 2.08 | 1.33 | 2128.00 | 3.10  | 0.54 | -0.30 |
| 1.93  | 1299.00 | 0.92 | 1.88 | 1.20 | 2182.00 | 6.23  | 2.59 | 1.46  |
| 1.52  | 1066.00 | 0.75 | 2.05 | 1.31 | 1512.00 | 3.90  | 0.26 | 0.15  |
| -0.51 | 1086.00 | 0.55 | 2.25 | 1.44 | 2742.00 | 2.01  | 1.63 | -0.92 |
| 0.61  | 2300.00 | 1.26 | 1.54 | 0.99 | 3479.00 | 4.57  | 0.93 | 0.52  |
| -1.51 | 1812.00 | 2.10 | 0.70 | 0.45 | 2458.00 | 2.97  | 0.67 | -0.38 |
| -0.78 | 3893.00 | 6.73 | 3.93 | 2.52 | 5507.00 | 10.30 | 6.66 | 3.74  |
| -1.06 | 3248.00 | 0.74 | 2.06 | 1.32 | 4008.00 | 4.97  | 1.33 | 0.74  |
| -1.18 | 1633.00 | 1.96 | 0.84 | 0.54 | 2455.00 | 5.34  | 1.70 | 0.95  |
| -1.39 | 2107.00 | 2.71 | 0.09 | 0.06 | 2742.00 | 1.57  | 2.07 | -1.16 |
| -0.90 | 3841.00 | 2.21 | 0.59 | 0.38 | 4564.00 | 5.32  | 1.68 | 0.95  |
| -1.46 | 3525.00 | 1.50 | 1.30 | 0.83 | 4072.00 | 3.24  | 0.40 | -0.22 |
| -1.46 | 2327.00 | 0.99 | 1.81 | 1.16 | 4075.00 | 2.58  | 1.06 | -0.60 |
| -1.00 | 2305.00 | 2.86 | 0.06 | 0.04 | 3721.00 | 6.80  | 3.16 | 1.78  |
| -0.88 | 2669.00 | 3.11 | 0.31 | 0.20 | 2698.00 | 1.85  | 1.79 | -1.00 |
| -1.08 | 2077.00 | 0.67 | 2.13 | 1.36 | 2267.00 | 1.50  | 2.14 | -1.20 |
| 0.91  | 2143.00 | 2.29 | 0.51 | 0.33 | 2683.00 | 7.64  | 4.00 | 2.25  |
| -0.59 | 2643.00 | 3.03 | 0.23 | 0.15 | 2416.00 | 2.90  | 0.74 | -0.42 |

|       |         |       |      |      |         |       |      |       |
|-------|---------|-------|------|------|---------|-------|------|-------|
| -0.03 | 2424.00 | 3.18  | 0.38 | 0.24 | 2875.00 | 3.23  | 0.41 | -0.23 |
| -1.27 | 2084.00 | 0.58  | 2.22 | 1.43 | 2281.00 | 1.93  | 1.71 | -0.96 |
| -1.09 | 2748.00 | 1.64  | 1.16 | 0.75 | 3642.00 | 1.92  | 1.72 | -0.97 |
| -0.21 | 2995.00 | 0.57  | 2.23 | 1.43 | 4548.00 | 3.69  | 0.05 | 0.03  |
| -1.02 | 1552.00 | 0.97  | 1.83 | 1.18 | 2497.00 | 3.28  | 0.36 | -0.20 |
| 0.68  | 2940.00 | 1.05  | 1.75 | 1.12 | 3661.00 | 7.46  | 3.82 | 2.14  |
| 2.02  | 2170.00 | 2.49  | 0.31 | 0.20 | 2760.00 | 3.70  | 0.06 | 0.03  |
| -1.04 | 3139.00 | 1.82  | 0.98 | 0.63 | 3410.00 | 1.09  | 2.56 | -1.44 |
| 1.71  | 5168.00 | 6.68  | 3.88 | 2.48 | 5520.00 | 8.77  | 5.13 | 2.88  |
| 0.58  | 4012.00 | 3.29  | 0.49 | 0.31 | 5841.00 | 7.22  | 3.58 | 2.01  |
| 1.71  | 3372.00 | 9.46  | 6.66 | 4.27 | 3896.00 | 8.03  | 4.39 | 2.47  |
| 0.04  | 2918.00 | 3.26  | 0.46 | 0.29 | 4308.00 | 5.13  | 1.49 | 0.84  |
| -0.71 | 2465.00 | 4.18  | 1.38 | 0.88 | 3604.00 | 4.02  | 0.38 | 0.21  |
| -1.27 | 3644.00 | 1.54  | 1.26 | 0.81 | 3559.00 | 3.06  | 0.58 | -0.32 |
| -1.36 | 2581.00 | 2.71  | 0.09 | 0.06 | 3528.00 | 3.00  | 0.64 | -0.36 |
| -0.48 | 2934.00 | 5.45  | 2.65 | 1.70 | 3606.00 | 6.30  | 2.66 | 1.49  |
| 0.13  | 2425.00 | 2.31  | 0.49 | 0.31 | 2719.00 | 5.48  | 1.84 | 1.03  |
| -0.59 | 2835.00 | 2.43  | 0.37 | 0.23 | 2942.00 | 3.03  | 0.61 | -0.35 |
| -0.29 | 2261.00 | 4.29  | 1.49 | 0.96 | 2253.00 | 4.48  | 0.84 | 0.47  |
| 2.37  | 347.00  | 12.68 | 9.88 | 6.33 | 362.00  | 10.22 | 6.58 | 3.70  |
| -0.75 | 785.00  | 5.99  | 3.19 | 2.04 | 1575.00 | 4.00  | 0.36 | 0.20  |
| -0.40 | 3094.00 | 4.27  | 1.47 | 0.94 | 5407.00 | 3.44  | 0.20 | -0.11 |
| 0.11  | 1579.00 | 2.41  | 0.39 | 0.25 | 3461.00 | 2.57  | 1.07 | -0.60 |
| -0.97 | 1867.00 | 1.98  | 0.82 | 0.52 | 3824.00 | 1.94  | 1.70 | -0.96 |
| -1.66 | 2587.00 | 2.59  | 0.21 | 0.13 | 3919.00 | 1.91  | 1.73 | -0.97 |
| -0.45 | 2286.00 | 3.24  | 0.44 | 0.28 | 3766.00 | 1.30  | 2.34 | -1.31 |
| 0.01  | 3727.00 | 3.57  | 0.77 | 0.49 | 4672.00 | 7.96  | 4.32 | 2.43  |
| -0.98 | 1862.00 | 6.18  | 3.38 | 2.16 | 2043.00 | 4.89  | 1.25 | 0.70  |
| 0.29  | 4727.00 | 3.74  | 0.94 | 0.61 | 4397.00 | 5.69  | 2.05 | 1.15  |
| 0.00  | 3545.00 | 5.44  | 2.64 | 1.70 | 4965.00 | 7.63  | 3.99 | 2.24  |
| -1.24 | 2715.00 | 5.64  | 2.84 | 1.82 | 3813.00 | 3.67  | 0.03 | 0.02  |
| 0.30  | 1599.00 | 5.44  | 2.64 | 1.69 | 2317.00 | 7.04  | 3.40 | 1.91  |
| 1.03  | 2831.00 | 3.46  | 0.66 | 0.42 | 4932.00 | 5.52  | 1.88 | 1.05  |
| -0.42 | 1888.00 | 2.75  | 0.05 | 0.03 | 2581.00 | 4.26  | 0.62 | 0.35  |
| -1.00 | 1964.00 | 2.75  | 0.05 | 0.03 | 3106.00 | 3.12  | 0.52 | -0.29 |
| -1.16 | 2949.00 | 2.68  | 0.12 | 0.08 | 2883.00 | 3.40  | 0.24 | -0.14 |
| -0.23 | 1545.00 | 3.50  | 0.70 | 0.45 | 1941.00 | 2.78  | 0.86 | -0.48 |
| 0.13  | 2466.00 | 2.96  | 0.16 | 0.10 | 2805.00 | 6.10  | 2.46 | 1.38  |
| -0.58 | 2763.00 | 3.00  | 0.20 | 0.13 | 2468.00 | 2.88  | 0.76 | -0.43 |
| -1.34 | 2007.00 | 4.63  | 1.83 | 1.18 | 2830.00 | 3.92  | 0.28 | 0.16  |
| -0.12 | 2260.00 | 2.08  | 0.72 | 0.46 | 3093.00 | 4.27  | 0.63 | 0.35  |
| -1.43 | 1067.00 | 3.37  | 0.57 | 0.37 | 1690.00 | 2.78  | 0.86 | -0.48 |
| -1.31 | 2722.00 | 0.88  | 1.92 | 1.23 | 2691.00 | 1.15  | 2.49 | -1.40 |
| -1.14 | 3323.00 | 1.56  | 1.24 | 0.79 | 3302.00 | 4.79  | 1.15 | 0.64  |
| -1.60 | 2456.00 | 2.00  | 0.80 | 0.52 | 2615.00 | 6.00  | 2.36 | 1.33  |
| -1.32 | 1980.00 | 2.12  | 0.68 | 0.44 | 2302.00 | 1.61  | 2.03 | -1.14 |
| -0.83 | 1481.00 | 0.54  | 2.26 | 1.45 | 1581.00 | 1.52  | 2.12 | -1.19 |

|         |         |      |         |       |         |      |      |       |
|---------|---------|------|---------|-------|---------|------|------|-------|
| -0.04   | 2851.00 | 2.28 | 0.52    | 0.33  | 3871.00 | 4.21 | 0.57 | 0.32  |
| -0.50   | 1903.00 | 7.93 | 5.13    | 3.29  | 2193.00 | 3.33 | 0.31 | -0.18 |
| 1.43    | 2816.00 | 3.76 | 0.96    | 0.62  | 3783.00 | 5.34 | 1.70 | 0.95  |
| -0.24   | 2948.00 | 2.41 | 0.39    | 0.25  | 3386.00 | 3.84 | 0.20 | 0.11  |
| 0.06    | 2827.00 | 4.53 | 1.73    | 1.11  | 3931.00 | 1.91 | 1.73 | -0.97 |
| 0.40    | 2647.00 | 3.36 | 0.56    | 0.36  | 2505.00 | 1.52 | 2.12 | -1.19 |
| -0.53   | 3700.00 | 2.19 | 0.61    | 0.39  | 3526.00 | 1.87 | 1.77 | -0.99 |
| -0.66   | 2998.00 | 1.07 | 1.73    | 1.11  | 3361.00 | 4.11 | 0.47 | 0.26  |
| 0.42    | 1173.00 | 4.86 | 2.06    | 1.32  | 1799.00 | 4.17 | 0.53 | 0.30  |
| 0.83    | 1691.00 | 3.08 | 0.28    | 0.18  | 1796.00 | 0.78 | 2.86 | -1.61 |
| 0.94    | 1177.00 | 4.76 | 1.96    | 1.26  | 1458.00 | 1.44 | 2.20 | -1.24 |
| 0.10    | 1805.00 | 2.05 | 0.75    | 0.48  | 2046.00 | 3.13 | 0.51 | -0.29 |
| 0.61    | 1775.00 | 4.62 | 1.82    | 1.17  | 2235.00 | 1.61 | 2.03 | -1.14 |
| 0.23    | 2637.00 | 1.90 | 0.90    | 0.58  | 1871.00 | 2.83 | 0.81 | -0.45 |
| -0.22   | 2422.00 | 3.14 | 0.34    | 0.22  | 2194.00 | 2.83 | 0.81 | -0.46 |
| 0.86    | 3295.00 | 2.52 | 0.28    | 0.18  | 3097.00 | 2.68 | 0.96 | -0.54 |
| 3.47    | 561.00  | 3.03 | 0.23    | 0.15  | 2251.00 | 5.29 | 1.65 | 0.92  |
| 0.34    | 1014.00 | 1.97 | 0.83    | 0.53  | 777.00  | 6.18 | 2.54 | 1.43  |
| 0.74    | 1694.00 | 3.42 | 0.62    | 0.40  | 1490.00 | 2.68 | 0.96 | -0.54 |
| 1.19    | 1138.00 | 2.64 | 0.16    | 0.11  | 1059.00 | 3.97 | 0.33 | 0.18  |
| 0.98    | 1648.00 | 6.07 | 3.27    | 2.09  | 1850.00 | 3.19 | 0.45 | -0.25 |
| 0.33    | 3083.00 | 1.85 | 0.95    | 0.61  | 3272.00 | 3.00 | 0.64 | -0.36 |
| 0.55    | 2162.00 | 1.94 | 0.86    | 0.55  | 2797.00 | 4.15 | 0.51 | 0.28  |
| -0.63   | 2760.00 | 1.78 | 1.02    | 0.66  | 4039.00 | 1.93 | 1.71 | -0.96 |
| -0.80   | 1593.00 | 3.08 | 0.28    | 0.18  | 3234.00 | 1.76 | 1.88 | -1.06 |
| 2.03    | 1914.00 | 4.44 | 1.64    | 1.05  | 2433.00 | 6.08 | 2.44 | 1.37  |
| 0.66    | 2508.00 | 1.83 | 0.97    | 0.62  | 2097.00 | 3.86 | 0.22 | 0.12  |
| -0.46   | 2204.00 | 2.13 | 0.67    | 0.43  | 3056.00 | 4.94 | 1.30 | 0.73  |
| 1.00    | 1980.00 | 2.32 | 0.48    | 0.31  | 2377.00 | 3.87 | 0.23 | 0.13  |
| 1.25    | 758.00  | 5.01 | 2.21    | 1.42  | 873.00  | 9.05 | 5.41 | 3.04  |
| -1.34   | 1633.00 | 1.47 | 1.33    | 0.85  | 2350.00 | 5.96 | 2.32 | 1.30  |
| 0.14    | 1972.00 | 6.54 | 3.74    | 2.40  | 2495.00 | 3.61 | 0.03 | -0.02 |
| -0.04   | 2144.00 | 2.57 | 0.23    | 0.15  | 1979.00 | 7.23 | 3.59 | 2.01  |
| -0.91   | 2671.00 | 3.67 | 0.87    | 0.56  | 1913.00 | 2.61 | 1.03 | -0.58 |
| 0.13    | 2312.00 | 4.58 | 1.78    | 1.14  | 2674.00 | 5.12 | 1.48 | 0.83  |
| 2.81    | 2568.00 | 5.84 | 3.04    | 1.95  | 2147.00 | 7.82 | 4.18 | 2.35  |
| -1.26   | 2985.00 | 2.48 | 0.32    | 0.21  | 3739.00 | 5.19 | 1.55 | 0.87  |
| -0.99   | 1954.00 | 0.61 | 2.19    | 1.40  | 2280.00 | 2.89 | 0.75 | -0.42 |
| -0.95   | 1703.00 | 3.23 | 0.43    | 0.28  | 1374.00 | 5.39 | 1.75 | 0.98  |
| -1.33   | 2644.00 | 3.10 | 0.30    | 0.19  | 1782.00 | 9.15 | 5.51 | 3.09  |
|         | 2639.50 | 2.80 | 1.06    |       | 2511.50 | 3.64 | 1.20 |       |
|         |         |      | 3.17    |       |         |      | 3.61 |       |
|         |         |      | 1.56    |       |         |      | 1.78 |       |
| 3127.00 | 10.11   |      | 3942.00 | 25.47 |         |      |      |       |
| 4028.00 | 22.72   |      | 4327.00 | 15.51 |         |      |      |       |
| 1962.00 | 9.43    |      | 3567.00 | 24.64 |         |      |      |       |
| 3410.00 | 14.40   |      | 4337.00 | 22.87 |         |      |      |       |



|         |       |         |       |
|---------|-------|---------|-------|
| 3131.75 | 14.16 | 4043.25 | 22.12 |
| 865.84  | 6.11  | 366.91  | 4.54  |
| 892.00  | 0.34  | 1113.00 | 3.77  |
| 696.00  | 0.72  | 2124.00 | 2.26  |
| 621.00  | 2.74  | 810.00  | 4.32  |
| 415.00  | 2.41  | 1236.00 | 4.77  |
| 577.33  | 1.96  | 1390.00 | 3.78  |
| 145.50  | 1.08  | 670.40  | 1.34  |
|         | 18.34 |         | 13.62 |
|         | 3.25  |         | 4.02  |
|         | 21.59 |         | 17.64 |
|         | 12.21 |         | 18.34 |
|         | 1.77  |         | 0.96  |
|         | -0.77 |         | 0.04  |
| 238.00  | 23.53 | 295.00  | 26.44 |
| 188.00  | 16.49 | 220.00  | 21.82 |
| 1489.00 | 4.30  | 1437.00 | 3.62  |
| 1893.00 | 1.85  | 1812.00 | 4.36  |
| 4010.00 | 4.06  | 6230.00 | 10.11 |
| 5043.00 | 3.89  | 5650.00 | 8.78  |

x toxic a,b,c

x art a,b

x toxic a,b,c

x toxic a,b,c

y

y

x toxic a,b

y



y

y

y

x

toxic a,b,c

x      debris a



| Plate    | Well | Gene                            | GeneID           | Cell Count | % inf | Abs Dev |
|----------|------|---------------------------------|------------------|------------|-------|---------|
| 50052.00 | A02  | M-013187- X antigen family, m   | 9503.00 XAGE1    | 3145.00    | 3.78  | 1.14    |
| 50052.00 | A04  | M-017496- X antigen family, m   | 9502.00 XAGE2    | 1550.00    | 1.94  | 0.70    |
| 50052.00 | A05  | M-017023- apelin, AGTRL1 ligar  | 8862.00 APLN     | 2492.00    | 3.37  | 0.73    |
| 50052.00 | A06  | M-017670- rabphilin 3A-like (wi | 9501.00 RPH3AL   | 2457.00    | 2.24  | 0.40    |
| 50052.00 | A07  | M-011545- period homolog 3 (I   | 8863.00 PER3     | 3112.00    | 0.96  | 1.68    |
| 50052.00 | A08  | M-007587- solute carrier family | 9498.00 SLC4A8   | 6178.00    | 3.98  | 1.34    |
| 50052.00 | A09  | M-008747- sphingosine-1-phos    | 8879.00 SGPL1    | 4439.00    | 3.76  | 1.12    |
| 50052.00 | A10  | M-007586- solute carrier family | 9497.00 SLC4A7   | 6026.00    | 6.06  | 3.42    |
| 50052.00 | A11  | M-009744- zinc finger protein 2 | 8882.00 ZNF259   | 2582.00    | 3.10  | 0.46    |
| 50052.00 | A12  | M-012320- proteasome (proso     | 9491.00 PSMF1    | 1436.00    | 2.58  | 0.06    |
| 50052.00 | A13  | M-006401- amyloid beta precu    | 8883.00 APPBP1   | 1868.00    | 3.27  | 0.63    |
| 50052.00 | A14  | M-009483- phosphatidylglycer    | 9489.00 PGS1     | 3920.00    | 0.59  | 2.05    |
| 50052.00 | A15  | M-007594- solute carrier family | 8884.00 SLC5A6   | 2634.00    | 2.35  | 0.29    |
| 50052.00 | A16  | M-017189- phosphatidylinosito   | 9488.00 PIGB     | 3448.00    | 0.93  | 1.71    |
| 50052.00 | A17  | M-011549- eukaryotic translati  | 8894.00 EIF2S2   | 747.00     | 2.14  | 0.50    |
| 50052.00 | A18  | M-011953- phosphatidylinosito   | 9487.00 PIGL     | 1610.00    | 5.96  | 3.32    |
| 50052.00 | A19  | M-018665- BUD31 homolog (S.     | 8896.00 BUD31    | 3779.00    | 2.49  | 0.15    |
| 50052.00 | A20  | M-009858- carbohydrate sulfot   | 9486.00 CHST10   | 5117.00    | 1.31  | 1.33    |
| 50052.00 | A21  | M-011551- copine I              | 8904.00 CPNE1    | 2001.00    | 3.10  | 0.46    |
| 50052.00 | A23  | M-017445- adaptor-related pro   | 8905.00 AP1S2    | 3370.00    | 1.72  | 0.92    |
| 50052.00 | B02  | M-013864- nucleoporin like 1    | 9818.00 NUPL1    | 3088.00    | 1.46  | 1.18    |
| 50052.00 | B04  | M-012453- kelch-like ECH-assoc  | 9817.00 KEAP1    | 2215.00    | 0.23  | 2.41    |
| 50052.00 | B05  | M-012344- P antigen family, m   | 9506.00 PAGE4    | 3536.00    | 0.31  | 2.33    |
| 50052.00 | B06  | M-021052- KIAA0133              | 9816.00 KIAA0133 | 4804.00    | 3.39  | 0.75    |
| 50052.00 | B07  | M-004747- peptidase (mitocho    | 9512.00 PMPCB    | 4097.00    | 3.27  | 0.63    |
| 50052.00 | B08  | M-024567- Sfi1 homolog, spind   | 9814.00 SFI1     | 3308.00    | 1.12  | 1.52    |
| 50052.00 | B09  | M-023581- syntaxin binding pro  | 9515.00 STXBP5L  | 2816.00    | 1.92  | 0.72    |
| 50052.00 | B10  | M-021022- KIAA0141              | 9812.00 KIAA0141 | 3691.00    | 1.30  | 1.34    |
| 50052.00 | B11  | M-006674- serine palmitoyltrar  | 9517.00 SPTLC2   | 5724.00    | 3.62  | 0.98    |
| 50052.00 | B12  | M-021020- KIAA0427              | 9811.00 KIAA0427 | 3029.00    | 1.62  | 1.02    |
| 50052.00 | B13  | M-015983- eukaryotic translati  | 9521.00 EEF1E1   | 3960.00    | 2.73  | 0.09    |
| 50052.00 | B14  | M-006913- ring finger protein 4 | 9810.00 RNF40    | 1995.00    | 0.75  | 1.89    |
| 50052.00 | B15  | M-009537- glycoprotein, synap   | 9524.00 GPSN2    | 3800.00    | 0.24  | 2.40    |
| 50052.00 | B16  | M-021004- KIAA0087 gene pro     | 9808.00 KIAA0087 | 4085.00    | 2.42  | 0.22    |
| 50052.00 | B17  | M-013119- vacuolar protein so   | 9525.00 VPS4B    | 3428.00    | 3.03  | 0.39    |
| 50052.00 | B18  | M-021002- sparco/osteonectin, c | 9806.00 SPOCK2   | 3860.00    | 4.74  | 2.10    |
| 50052.00 | B19  | M-019876- mannose-P-dolichol    | 9526.00 MPDU1    | 5902.00    | 1.66  | 0.98    |
| 50052.00 | B20  | M-017879- secernin 1            | 9805.00 SCRNI    | 3636.00    | 2.56  | 0.08    |
| 50052.00 | B21  | M-010909- transmembrane pro     | 9528.00 TMEM59   | 4505.00    | 4.20  | 1.56    |
| 50052.00 | B23  | M-008887- polymerase (RNA) I    | 9533.00 POLR1C   | 2757.00    | 2.10  | 0.54    |
| 50052.00 | C02  | M-019873- syntaxin 8            | 9482.00 STX8     | 2728.00    | 1.10  | 1.54    |
| 50052.00 | C04  | M-006094- Trf (TATA binding pr  | 9477.00 TRFP     | 3910.00    | 3.40  | 0.76    |
| 50052.00 | C05  | M-011552- adaptor-related pro   | 8906.00 AP1G2    | 4199.00    | 2.55  | 0.09    |
| 50052.00 | C06  | M-005976- napsin A aspartic pe  | 9476.00 NAPSA    | 4680.00    | 0.56  | 2.08    |
| 50052.00 | C07  | M-013196- adaptor-related pro   | 8907.00 AP1M1    | 4889.00    | 2.86  | 0.22    |
| 50052.00 | C08  | M-019871- chromosome 1 ope      | 9473.00 C1orf38  | 4138.00    | 1.47  | 1.17    |

|              |                                 |                   |         |      |      |
|--------------|---------------------------------|-------------------|---------|------|------|
| 50052.00 C09 | M-006640- glycogenin 2          | 8908.00 GYG2      | 4576.00 | 2.29 | 0.35 |
| 50052.00 C10 | M-019870- eukaryotic translati  | 9470.00 EIF4E2    | 2131.00 | 0.38 | 2.26 |
| 50052.00 C11 | M-008695- bassoon (presynapt    | 8927.00 BSN       | 3901.00 | 2.59 | 0.05 |
| 50052.00 C12 | M-003958- carbohydrate (chon    | 9469.00 CHST3     | 2790.00 | 2.04 | 0.60 |
| 50052.00 C13 | M-012627- family with sequenc   | 8933.00 FAM127A   | 2605.00 | 2.11 | 0.53 |
| 50052.00 C14 | M-009611- phosphate cytidylyl   | 9468.00 PCYT1B    | 2398.00 | 1.13 | 1.51 |
| 50052.00 C15 | M-029452- far upstream eleme    | 8939.00 FUBP3     | 3726.00 | 4.29 | 1.65 |
| 50052.00 C16 | M-016041- homer homolog 1 (l    | 9456.00 HOMER1    | 3556.00 | 2.28 | 0.36 |
| 50052.00 C17 | M-016014- adaptor-related pro   | 8943.00 AP3D1     | 3237.00 | 1.79 | 0.85 |
| 50052.00 C18 | M-019867- homer homolog 2 (l    | 9455.00 HOMER2    | 3386.00 | 5.94 | 3.30 |
| 50052.00 C19 | M-013127- histone cluster 1, H  | 8968.00 HIST1H3F  | 3103.00 | 8.19 | 5.55 |
| 50052.00 C20 | M-005215- homer homolog 3 (l    | 9454.00 HOMER3    | 3574.00 | 4.48 | 1.84 |
| 50052.00 C21 | M-013118- histone cluster 1, H  | 8970.00 HIST1H2BJ | 2522.00 | 3.29 | 0.65 |
| 50052.00 C23 | M-012167- H1 histone family, n  | 8971.00 H1FX      | 4312.00 | 4.52 | 1.88 |
| 50052.00 D02 | M-006487- translocase of outer  | 9804.00 TOMM20    | 2820.00 | 0.04 | 2.60 |
| 50052.00 D04 | M-013418- mitochondrial ribos   | 9801.00 MRPL19    | 4979.00 | 2.17 | 0.47 |
| 50052.00 D05 | M-019877- zinc finger protein 2 | 9534.00 ZNF254    | 5333.00 | 2.49 | 0.15 |
| 50052.00 D06 | M-020977- KIAA0174              | 9798.00 KIAA0174  | 4365.00 | 1.19 | 1.45 |
| 50052.00 D07 | M-016236- CBF1 interacting cor  | 9541.00 CIR       | 6058.00 | 1.14 | 1.50 |
| 50052.00 D08 | M-020966- TatD DNase domain     | 9797.00 TATDN2    | 3660.00 | 0.96 | 1.68 |
| 50052.00 D09 | M-011962- amyloid beta (A4) p   | 9546.00 APBA3     | 2900.00 | 2.83 | 0.19 |
| 50052.00 D10 | M-020952- phytanoyl-CoA 2-hy    | 9796.00 PHYHIP    | 4373.00 | 2.15 | 0.49 |
| 50052.00 D11 | M-013608- ATPase, H+ transpo    | 9550.00 ATP6V1G1  | 3985.00 | 1.43 | 1.21 |
| 50052.00 D12 | M-006847- cytoskeleton associ   | 9793.00 CKAP5     | 3009.00 | 1.83 | 0.81 |
| 50052.00 D13 | M-012690- ATP synthase, H+ tr   | 9551.00 ATP5J2    | 4117.00 | 2.72 | 0.08 |
| 50052.00 D14 | M-020913- BMS1 homolog, ribo    | 9790.00 BMS1      | 4933.00 | 3.30 | 0.66 |
| 50052.00 D15 | M-019881- sperm associated ar   | 9552.00 SPAG7     | 4082.00 | 1.54 | 1.10 |
| 50052.00 D16 | M-020897- signal peptidase cor  | 9789.00 SPCS2     | 4779.00 | 4.37 | 1.73 |
| 50052.00 D17 | M-017401- mitochondrial ribos   | 9553.00 MRPL33    | 3509.00 | 1.20 | 1.44 |
| 50052.00 D18 | M-018506- metastasis suppress   | 9788.00 MTSS1     | 5301.00 | 1.28 | 1.36 |
| 50052.00 D19 | M-019882- chromosome 14 op      | 9556.00 C14orf2   | 5640.00 | 1.72 | 0.92 |
| 50052.00 D20 | M-020892- KIAA0586              | 9786.00 KIAA0586  | 3906.00 | 1.69 | 0.95 |
| 50052.00 D21 | M-014368- chromodomain heli     | 9557.00 CHD1L     | 5028.00 | 4.20 | 1.56 |
| 50052.00 D23 | M-013195- vacuolar protein sol  | 9559.00 VPS26A    | 4111.00 | 4.65 | 2.01 |
| 50052.00 E02 | M-019433- integral membrane     | 9452.00 ITM2A     | 2618.00 | 8.06 | 5.42 |
| 50052.00 E04 | M-019866- lymphocyte antigen    | 9450.00 LY86      | 3535.00 | 6.79 | 4.15 |
| 50052.00 E05 | M-006367- procollagen-proline   | 8974.00 P4HA2     | 3162.00 | 1.39 | 1.25 |
| 50052.00 E06 | M-024905- quaking homolog, K    | 9444.00 QKI       | 4052.00 | 2.64 | 0.00 |
| 50052.00 E07 | M-004286- procollagen-lysine, 1 | 8985.00 PLOD3     | 1209.00 | 2.98 | 0.34 |
| 50052.00 E08 | M-008963- carbohydrate (N-ac    | 9435.00 CHST2     | 6278.00 | 8.30 | 5.66 |
| 50052.00 E09 | M-019489- genethonin 1          | 8987.00 GENX-3414 | 2036.00 | 1.42 | 1.22 |
| 50052.00 E10 | M-006265- potassium channel,    | 9424.00 KCNK6     | 3137.00 | 4.08 | 1.44 |
| 50052.00 E11 | M-011559- ATPase, H+ transpo    | 8992.00 ATP6V0E1  | 1832.00 | 1.20 | 1.44 |
| 50052.00 E12 | M-012661- zinc finger protein 2 | 9422.00 ZNF264    | 4363.00 | 2.91 | 0.27 |
| 50052.00 E13 | M-007473- solute carrier family | 9016.00 SLC25A14  | 2203.00 | 3.77 | 1.13 |
| 50052.00 E14 | M-006904- cysteine-rich PDZ-bi  | 9419.00 CRIPT     | 3512.00 | 3.39 | 0.75 |
| 50052.00 E15 | M-008288- cholesterol 25-hydr   | 9023.00 CH25H     | 3047.00 | 1.81 | 0.83 |

|                     |                                        |                         |                |             |             |
|---------------------|----------------------------------------|-------------------------|----------------|-------------|-------------|
| 50052.00 E16        | M-019861- DEAD (Asp-Glu-Ala-           | 9416.00 DDX23           | 5392.00        | 6.19        | <b>3.55</b> |
| 50052.00 E17        | M-027079- huntingtin interacti         | 9026.00 HIP1R           | 3445.00        | 5.34        | 2.70        |
| 50052.00 E18        | M-008211- fatty acid saturas           | 9415.00 FADS2           | 3616.00        | 2.05        | 0.59        |
| 50052.00 E19        | M-006027- rhomboid, veinlet-li         | 9028.00 RHBDL1          | 3437.00        | 4.57        | 1.93        |
| 50052.00 E20        | M-021464- chromosome 9 ope             | 9413.00 C9orf61         | 2462.00        | 0.85        | 1.79        |
| 50052.00 E21        | M-003717- transmembrane 4 L            | 9032.00 TM4SF5          | 3381.00        | 3.22        | 0.58        |
| 50052.00 E23        | M-019490- sema domain, sever           | 9037.00 SEMA5A          | 3073.00        | 3.91        | 1.27        |
| 50052.00 F02        | M-013428- DEAH (Asp-Glu-Ala-           | 9785.00 DHX38           | 3541.00        | 1.55        | 1.09        |
| 50052.00 F04        | M-013427- sorting nexin 17             | 9784.00 SNX17           | 1671.00        | 4.37        | 1.73        |
| 50052.00 F05        | M-004692- hexose-6-phosphat            | 9563.00 H6PD            | 3247.00        | 1.76        | 0.88        |
| 50052.00 F06        | M-020891- regulating synaptic          | 9783.00 RIMS3           | 3123.00        | 2.08        | 0.56        |
| 50052.00 F07        | M-017321- GTP binding protein          | 9567.00 GTPBP1          | 3482.00        | 2.10        | 0.54        |
| 50052.00 F08        | M-020870- family with sequenc          | 9780.00 FAM38A          | 5514.00        | 6.13        | <b>3.49</b> |
| 50052.00 F09        | M-004852- growth differenti            | 9573.00 GDF3            | 3663.00        | 2.76        | 0.12        |
| 50052.00 F10        | M-020775- TBC1 domain family           | 9779.00 TBC1D5          | 4281.00        | 2.71        | 0.07        |
| 50052.00 F11        | M-020038- SRY (sex determinin          | 9580.00 SOX13           | 4178.00        | 1.77        | 0.87        |
| 50052.00 F12        | M-024153- KIAA0232 gene pro            | 9778.00 KIAA0232        | 2287.00        | 1.92        | 0.72        |
| 50052.00 F13        | M-005904- prolyl endopeptidas          | 9581.00 PREPL           | 2423.00        | 2.64        | 0.00        |
| 50052.00 F14        | M-020769- transmembrane 9 s            | 9777.00 TM9SF4          | 5050.00        | 2.69        | 0.05        |
| 50052.00 F15        | M-011965- RNA binding motif p          | 9584.00 RBM39           | 3462.00        | 2.69        | 0.05        |
| 50052.00 F16        | M-020765- KIAA0652                     | 9776.00 KIAA0652        | 5065.00        | 3.57        | 0.93        |
| 50052.00 F17        | M-020817- MAD2L1 binding pro           | 9587.00 MAD2L1BP        | 2354.00        | 1.91        | 0.73        |
| 50052.00 F18        | M-020762- eukaryotic translati         | 9775.00 EIF4A3          | 5802.00        | 4.33        | 1.69        |
| 50052.00 F19        | M-019884- immediate early res          | 9592.00 IER2            | 4924.00        | 2.64        | 0.00        |
| 50052.00 F20        | M-020722- KIAA0195                     | 9772.00 KIAA0195        | 3374.00        | 4.45        | 1.81        |
| 50052.00 F21        | M-013414- pleckstrin homology          | 9595.00 PSCDBP          | 4538.00        | 1.98        | 0.66        |
| 50052.00 F23        | M-005212- CSAG family, memb            | 9598.00 CSAG2           | 5007.00        | 2.02        | 0.62        |
| 50052.00 G02        | M-010158- zinc finger, RAN-bin         | 9406.00 ZRANB2          | 3346.00        | 0.75        | 1.89        |
| 50052.00 G04        | M-009360- stomatin (EPB72)-lil         | 9399.00 STOML1          | 2135.00        | 0.70        | 1.94        |
| 50052.00 G05        | M-012948- ribosomal protein L          | 9045.00 RPL14           | 527.00         | 1.71        | 0.93        |
| 50052.00 G06        | M-019858- immunoglobulin suj           | 9398.00 IGSF2           | 3787.00        | 1.64        | 1.00        |
| 50052.00 G07        | M-009953- artemin                      | 9048.00 ARTN            | 3800.00        | 1.76        | 0.88        |
| 50052.00 G08        | M-004317- N-myristoyltransfer          | 9397.00 NMT2            | 3073.00        | 1.92        | 0.72        |
| 50052.00 G09        | M-011564- NFS1 nitrogen fixati         | 9054.00 NFS1            | 3870.00        | 2.40        | 0.24        |
| 50052.00 G10        | M-011944- heparan sulfate 6-O          | 9394.00 HS6ST1          | 2581.00        | 0.93        | 1.71        |
| 50052.00 G11        | M-007616- solute carrier family        | 9057.00 SLC7A6          | 3212.00        | 1.21        | 1.43        |
| 50052.00 G12        | M-007447- solute carrier family        | 9390.00 SLC22A13        | 4629.00        | 2.31        | 0.33        |
| 50052.00 G13        | M-007392- solute carrier family        | 9058.00 SLC13A2         | 1863.00        | 0.97        | 1.67        |
| <b>50052.00 G14</b> | <b>M-007448- solute carrier family</b> | <b>9389.00 SLC22A14</b> | <b>4248.00</b> | <b>5.13</b> | <b>2.49</b> |
| 50052.00 G15        | M-004306- synaptotagmin VII            | 9066.00 SYT7            | 3300.00        | 4.64        | 2.00        |
| 50052.00 G16        | M-013309- component of oligo           | 9382.00 COG1            | 2837.00        | 1.52        | 1.12        |
| 50052.00 G17        | M-019831- ash2 (absent, small,         | 9070.00 ASH2L           | 3366.00        | 1.40        | 1.24        |
| 50052.00 G18        | M-012905- neurexin 2                   | 9379.00 NRXN2           | 6253.00        | 4.67        | 2.03        |
| 50052.00 G19        | M-017049- claudin 8                    | 9073.00 CLDN8           | 3212.00        | 2.68        | 0.04        |
| 50052.00 G20        | M-011941- neurexin 1                   | 9378.00 NRXN1           | 6009.00        | 4.78        | 2.14        |
| 50052.00 G21        | M-015883- claudin 6                    | 9074.00 CLDN6           | 3887.00        | 3.47        | 0.83        |
| 50052.00 G23        | M-014125- claudin 9                    | 9080.00 CLDN9           | 2220.00        | 0.32        | 2.32        |

|              |                                  |         |           |         |      |      |
|--------------|----------------------------------|---------|-----------|---------|------|------|
| 50052.00 H02 | M-017672- KIAA0101               | 9768.00 | KIAA0101  | 4189.00 | 2.43 | 0.21 |
| 50052.00 H04 | M-013431- PHD finger protein     | 9767.00 | PHF16     | 6269.00 | 4.40 | 1.76 |
| 50052.00 H05 | M-019888- phosphatidylinosito    | 9600.00 | PITPNM1   | 4048.00 | 6.77 | 4.13 |
| 50052.00 H06 | M-020259- KIAA0247               | 9766.00 | KIAA0247  | 4410.00 | 1.72 | 0.92 |
| 50052.00 H07 | M-009931- guanine deaminase      | 9615.00 | GDA       | 6735.00 | 5.40 | 2.76 |
| 50052.00 H08 | M-020254- zinc finger, FYVE do   | 9765.00 | ZFYVE16   | 3657.00 | 0.82 | 1.82 |
| 50052.00 H09 | M-019211- mitochondrial trans    | 9617.00 | MTRF1     | 4003.00 | 1.40 | 1.24 |
| 50052.00 H10 | M-020292- KIAA0513               | 9764.00 | KIAA0513  | 3682.00 | 4.94 | 2.30 |
| 50052.00 H11 | M-005915- kallikrein-related pe  | 9622.00 | KLK4      | 4381.00 | 5.20 | 2.56 |
| 50052.00 H12 | M-013436- ProSAPiP1 protein      | 9762.00 | ProSAPiP1 | 2802.00 | 2.28 | 0.36 |
| 50052.00 H13 | M-012068- synuclein, alpha int   | 9627.00 | SNCAIP    | 3563.00 | 3.17 | 0.53 |
| 50052.00 H14 | M-020316- KIAA0152               | 9761.00 | KIAA0152  | 3382.00 | 2.60 | 0.04 |
| 50052.00 H15 | M-010703- chloride channel, ca   | 9629.00 | CLCA3     | 3632.00 | 2.62 | 0.02 |
| 50052.00 H16 | M-020339- thymocyte selectior    | 9760.00 | TOX       | 1460.00 | 4.38 | 1.74 |
| 50052.00 H17 | M-011967- nucleoporin 155kDa     | 9631.00 | NUP155    | 2803.00 | 1.96 | 0.68 |
| 50052.00 H18 | M-010632- FERM and PDZ dom       | 9758.00 | FRMPD4    | 3242.00 | 3.08 | 0.44 |
| 50052.00 H19 | M-008467- SEC24 related gene     | 9632.00 | SEC24C    | 3915.00 | 1.02 | 1.62 |
| 50052.00 H20 | M-020406- TBK1 binding protei    | 9755.00 | TBKBP1    | 2740.00 | 2.63 | 0.01 |
| 50052.00 H21 | M-011968- metallothionein-like   | 9633.00 | MTL5      | 4167.00 | 2.18 | 0.46 |
| 50052.00 H23 | M-004235- ISG15 ubiquitin-like   | 9636.00 | ISG15     | 4617.00 | 2.49 | 0.15 |
| 50052.00 I02 | M-011940- cytochrome c oxida     | 9377.00 | COX5A     | 4486.00 | 4.08 | 1.44 |
| 50052.00 I04 | M-007459- solute carrier family  | 9376.00 | SLC22A8   | 3392.00 | 1.33 | 1.31 |
| 50052.00 I05 | M-019833- PTPN13-like, Y-link    | 9081.00 | PRY       | 2477.00 | 0.65 | 1.99 |
| 50052.00 I06 | M-010221- transmembrane 9 s      | 9375.00 | TM9SF2    | 2484.00 | 2.70 | 0.06 |
| 50052.00 I07 | M-011907- basic charge, Y-link   | 9083.00 | BPY2      | 2232.00 | 1.57 | 1.07 |
| 50052.00 I08 | M-005076- palmitoyl-protein tr   | 9374.00 | PPT2      | 1448.00 | 4.01 | 1.37 |
| 50052.00 I09 | M-006469- variable charge, Y-li  | 9084.00 | VCY       | 2251.00 | 4.89 | 2.25 |
| 50052.00 I10 | M-011937- neurexin 3             | 9369.00 | NRXN3     | 4867.00 | 4.03 | 1.39 |
| 50052.00 I11 | M-011909- phosphatidylinosito    | 9091.00 | PIGQ      | 2919.00 | 3.87 | 1.23 |
| 50052.00 I12 | M-012688- solute carrier family  | 9368.00 | SLC9A3R1  | 2677.00 | 3.81 | 1.17 |
| 50052.00 I13 | M-017792- DnaJ (Hsp40) homo      | 9093.00 | DNAJA3    | 2586.00 | 1.12 | 1.52 |
| 50052.00 I14 | M-011936- klotho                 | 9365.00 | KL        | 4841.00 | 4.07 | 1.43 |
| 50052.00 I15 | M-027340- Fc fragment of IgG,    | 9103.00 | FCGR2C    | 1416.00 | 3.67 | 1.03 |
| 50052.00 I16 | M-012162- copine VI (neuronal    | 9362.00 | CPNE6     | 2622.00 | 1.53 | 1.11 |
| 50052.00 I17 | M-013396- regucalcin (senesce    | 9104.00 | RGN       | 1616.00 | 2.04 | 0.60 |
| 50052.00 I18 | M-003979- lon peptidase 1, mit   | 9361.00 | LONP1     | 2595.00 | 3.47 | 0.83 |
| 50052.00 I19 | M-019238- ATPase, H+ transpo     | 9114.00 | ATP6V0D1  | 1169.00 | 4.96 | 2.32 |
| 50052.00 I20 | M-007457- solute carrier family  | 9356.00 | SLC22A6   | 2094.00 | 1.86 | 0.78 |
| 50052.00 I21 | M-011911- SEC22 vesicle traffic  | 9117.00 | SEC22C    | 2613.00 | 2.03 | 0.61 |
| 50052.00 I23 | M-014975- internexin neuronal    | 9118.00 | INA       | 1999.00 | 3.45 | 0.81 |
| 50052.00 J02 | M-010254- START domain cont      | 9754.00 | STARD8    | 1702.00 | 2.76 | 0.12 |
| 50052.00 J04 | M-020407- zinc finger and SCAI   | 9753.00 | ZSCAN12   | 4516.00 | 3.43 | 0.79 |
| 50052.00 J05 | M-021364- fasciculation and ek   | 9637.00 | FEZ2      | 3465.00 | 4.16 | 1.52 |
| 50052.00 J06 | M-020417- syntaphilin            | 9751.00 | SNPH      | 3195.00 | 1.47 | 1.17 |
| 50052.00 J07 | M-020790- zinc finger protein 5  | 9640.00 | ZNF592    | 1326.00 | 9.58 | 6.94 |
| 50052.00 J08 | M-013598- chromosome 6 ope       | 9750.00 | C6orf32   | 2541.00 | 2.75 | 0.11 |
| 50052.00 J09 | M-006380- mortality factor 4 lil | 9643.00 | MORF4L2   | 2146.00 | 7.32 | 4.68 |

|                     |                                        |                       |                |              |             |
|---------------------|----------------------------------------|-----------------------|----------------|--------------|-------------|
| 50052.00 J10        | M-020445- phosphatase and ac           | 9749.00 PHACTR2       | 795.00         | 3.52         | 0.88        |
| 50052.00 J11        | M-032246- Ctr9, Paf1/RNA poly          | 9646.00 CTR9          | 1873.00        | 2.94         | 0.30        |
| 50052.00 J12        | M-020501- KIAA0738 gene pro            | 9747.00 KIAA0738      | 1853.00        | 1.89         | 0.75        |
| 50052.00 J13        | M-013457- GRIP and coiled-coil         | 9648.00 GCC2          | 3833.00        | 2.95         | 0.31        |
| <b>50052.00 J14</b> | <b>M-020506- zinc finger protein 5</b> | <b>9745.00 ZNF536</b> | <b>3325.00</b> | <b>12.36</b> | <b>9.72</b> |
| 50052.00 J15        | M-019432- mitochondrial fissio         | 9650.00 MTFR1         | 2322.00        | 2.33         | 0.31        |
| 50052.00 J16        | M-021188- centaurin, beta 1            | 9744.00 CENTB1        | 2881.00        | 1.56         | 1.08        |
| 50052.00 J17        | M-027529- phospholipase C, et          | 9651.00 PLCH2         | 3363.00        | 1.52         | 1.12        |
| 50052.00 J18        | M-021253- intraflagellar transp        | 9742.00 IFT140        | 3899.00        | 2.98         | 0.34        |
| 50052.00 J19        | M-020959- KIAA0372                     | 9652.00 KIAA0372      | 3095.00        | 2.42         | 0.22        |
| 50052.00 J20        | M-013439- lysosomal-associate          | 9741.00 LAPTM4A       | 2640.00        | 2.61         | 0.03        |
| 50052.00 J21        | M-003863- heparan sulfate 2-O          | 9653.00 HS2ST1        | 3541.00        | 0.90         | 1.74        |
| 50052.00 J23        | M-020210- tubulin tyrosine liga        | 9654.00 TTLL4         | 2567.00        | 4.64         | 2.00        |
| 50052.00 K02        | M-019197- LIM homeobox 2               | 9355.00 LHX2          | 4287.00        | 1.61         | 1.03        |
| 50052.00 K04        | M-012687- thioredoxin-like 1           | 9352.00 TXNL1         | 3305.00        | 1.33         | 1.31        |
| 50052.00 K05        | M-007408- solute carrier family        | 9120.00 SLC16A6       | 3264.00        | 4.26         | 1.62        |
| 50052.00 K06        | M-012019- cerberus 1, cysteine         | 9350.00 CER1          | 3993.00        | 0.53         | 2.11        |
| 50052.00 K07        | M-007407- solute carrier family        | 9121.00 SLC16A5       | 2746.00        | 2.22         | 0.42        |
| 50052.00 K08        | M-013634- ribosomal protein L          | 9349.00 RPL23         | 476.00         | 3.15         | 0.51        |
| 50052.00 K09        | M-007406- solute carrier family        | 9122.00 SLC16A4       | 1866.00        | 2.14         | 0.50        |
| 50052.00 K10        | M-008697- N-deacetylase/N-su           | 9348.00 NDST3         | 3918.00        | 3.75         | 1.11        |
| 50052.00 K11        | M-005126- solute carrier family        | 9123.00 SLC16A3       | 657.00         | 5.94         | 3.30        |
| 50052.00 K12        | M-019851- elongation factor Tu         | 9343.00 EFTUD2        | 986.00         | 5.17         | 2.53        |
| 50052.00 K13        | M-006834- structural maintena          | 9126.00 SMC3          | 1647.00        | 3.58         | 0.94        |
| 50052.00 K14        | M-011935- synaptosomal-assoc           | 9342.00 SNAP29        | 1244.00        | 1.45         | 1.19        |
| 50052.00 K15        | M-012678- family with sequenc          | 9130.00 FAM50A        | 2459.00        | 1.42         | 1.22        |
| 50052.00 K16        | M-011934- vesicle-associated n         | 9341.00 VAMP3         | 1634.00        | 2.45         | 0.19        |
| 50052.00 K17        | M-017645- rabaptin, RAB GTPa           | 9135.00 RABEP1        | 1676.00        | 3.22         | 0.58        |
| 50052.00 K18        | M-010389- UDP-Gal:betaGlcNA            | 9334.00 B4GALT5       | 2385.00        | 4.99         | 2.35        |
| 50052.00 K19        | M-017793- RRP9, small subunit          | 9136.00 RRP9          | 2234.00        | 3.09         | 0.45        |
| 50052.00 K20        | M-009636- transglutaminase 5           | 9333.00 TGM5          | 689.00         | 3.77         | 1.13        |
| 50052.00 K21        | M-019837- chromosome X ope             | 9142.00 CXorf1        | 1846.00        | 5.96         | <b>3.32</b> |
| 50052.00 K23        | M-017320- synaptogyrin 3               | 9143.00 SYNGR3        | 3915.00        | 4.65         | 2.01        |
| 50052.00 L02        | M-022793- SET domain contain           | 9739.00 SETD1A        | 2248.00        | 1.69         | 0.95        |
| 50052.00 L04        | M-017658- CP110 protein                | 9738.00 CP110         | 1929.00        | 1.30         | 1.34        |
| 50052.00 L05        | M-021206- IQ motif containing          | 9657.00 IQCB1         | 2931.00        | 2.05         | 0.59        |
| 50052.00 L06        | M-006082- ubiquitin specific pe        | 9736.00 USP34         | 5856.00        | 3.35         | 0.71        |
| 50052.00 L07        | M-006909- zinc finger protein 5        | 9658.00 ZNF516        | 3626.00        | 1.63         | 1.01        |
| 50052.00 L08        | M-006829- kinetochore associa          | 9735.00 KNTC1         | 2206.00        | 2.40         | 0.24        |
| 50052.00 L09        | M-021870- phosphodiesterase            | 9659.00 PDE4DIP       | 2408.00        | 1.12         | 1.52        |
| 50052.00 L10        | M-013447- squamous cell carci          | 9733.00 SART3         | 3222.00        | 2.89         | 0.25        |
| 50052.00 L11        | M-013458- lipin 2                      | 9663.00 LPIN2         | 2283.00        | 2.01         | 0.63        |
| 50052.00 L12        | M-017968- dedicator of cytokir         | 9732.00 DOCK4         | 1130.00        | 5.31         | 2.67        |
| 50052.00 L13        | M-019172- KIAA0430                     | 9665.00 KIAA0430      | 2446.00        | 2.37         | 0.27        |
| 50052.00 L14        | M-006911- KIAA0562                     | 9731.00 KIAA0562      | 2891.00        | 1.63         | 1.01        |
| 50052.00 L15        | M-006910- zinc finger DAZ inte         | 9666.00 DZIP3         | 2288.00        | 1.62         | 1.02        |
| 50052.00 L16        | M-021119- Vpr (HIV-1) binding          | 9730.00 VPRBP         | 1322.00        | 3.03         | 0.39        |



|              |                                 |                   |         |       |       |
|--------------|---------------------------------|-------------------|---------|-------|-------|
| 50052.00 L17 | M-020373- scaffold attachment   | 9667.00 SAFB2     | 4115.00 | 3.65  | 1.01  |
| 50052.00 L18 | M-022242- KIAA0256 gene pro     | 9728.00 KIAA0256  | 3685.00 | 3.85  | 1.21  |
| 50052.00 L19 | M-020326- zinc finger protein 4 | 9668.00 ZNF432    | 4425.00 | 3.46  | 0.82  |
| 50052.00 L20 | M-021079- RAB11 family intera   | 9727.00 RAB11FIP3 | 1699.00 | 69.69 | 67.05 |
| 50052.00 L21 | M-013331- eukaryotic translati  | 9669.00 EIF5B     | 2404.00 | 6.82  | 4.18  |
| 50052.00 L23 | M-020212- importin 13           | 9670.00 IPO13     | 3885.00 | 3.81  | 1.17  |
| 50052.00 M02 | M-011933- UDP-Gal:betaGlcNA     | 9331.00 B4GALT6   | 2794.00 | 0.32  | 2.32  |
| 50052.00 M04 | M-008740- phosphotriesterase    | 9317.00 PTER      | 6024.00 | 4.13  | 1.49  |
| 50052.00 M05 | M-011914- synaptogyrin 2        | 9144.00 SYNGR2    | 2904.00 | 1.52  | 1.12  |
| 50052.00 M06 | M-019848- chromosome 5 ope      | 9315.00 C5orf13   | 2357.00 | 0.68  | 1.96  |
| 50052.00 M07 | M-011915- synaptogyrin 1        | 9145.00 SYNGR1    | 2777.00 | 0.97  | 1.67  |
| 50052.00 M08 | M-011931- zinc finger protein 2 | 9310.00 ZNF235    | 2765.00 | 1.48  | 1.16  |
| 50052.00 M09 | M-016835- hepatocyte growth     | 9146.00 HGS       | 3290.00 | 0.85  | 1.79  |
| 50052.00 M10 | M-017375- suppressor of cytok   | 9306.00 SOCS6     | 4742.00 | 4.37  | 1.73  |
| 50052.00 M11 | M-019106- serologically define  | 9147.00 SDCCAG1   | 3085.00 | 2.50  | 0.14  |
| 50052.00 M12 | M-019746- nuclear pore compl    | 9284.00 NPIP      | 3363.00 | 2.29  | 0.35  |
| 50052.00 M13 | M-007605- solute carrier family | 9152.00 SLC6A5    | 1955.00 | 1.38  | 1.26  |
| 50052.00 M14 | M-015820- zinc finger and BTB   | 9278.00 ZBTB22    | 2702.00 | 5.40  | 2.76  |
| 50052.00 M15 | M-007504- solute carrier family | 9153.00 SLC28A2   | 2665.00 | 5.67  | 3.03  |
| 50052.00 M16 | M-009242- WD repeat domain      | 9277.00 WDR46     | 2485.00 | 1.21  | 1.43  |
| 50052.00 M17 | M-007503- solute carrier family | 9154.00 SLC28A1   | 2714.00 | 2.17  | 0.47  |
| 50052.00 M18 | M-017230- B-cell CLL/lymphom    | 9274.00 BCL7C     | 2872.00 | 2.51  | 0.13  |
| 50052.00 M19 | M-013179- cytochrome c oxida    | 9167.00 COX7A2L   | 2955.00 | 2.91  | 0.27  |
| 50052.00 M20 | M-012719- calcium channel, vo   | 9254.00 CACNA2D2  | 164.00  | 50.61 | 47.97 |
| 50052.00 M21 | M-011561- myomesin (M-prote     | 9172.00 MYOM2     | 3431.00 | 3.47  | 0.83  |
| 50052.00 M23 | M-011918- adaptor-related pro   | 9179.00 AP4M1     | 3606.00 | 9.96  | 7.32  |
| 50052.00 N02 | M-021050- zinc finger protein 6 | 9726.00 ZNF646    | 2277.00 | 0.61  | 2.03  |
| 50052.00 N04 | M-021043- transmembrane prc     | 9725.00 TMEM63A   | 2832.00 | 1.20  | 1.44  |
| 50052.00 N05 | M-026920- WSC domain contai     | 9671.00 WSCD2     | 2810.00 | 2.38  | 0.26  |
| 50052.00 N06 | M-014126- UTP14, U3 small nu    | 9724.00 UTP14C    | 3913.00 | 4.40  | 1.76  |
| 50052.00 N07 | M-020563- syndecan 3            | 9672.00 SDC3      | 5000.00 | 6.46  | 3.82  |
| 50052.00 N08 | M-020073- sema domain, immu     | 9723.00 SEMA3E    | 2073.00 | 1.93  | 0.71  |
| 50052.00 N09 | M-007339- solute carrier family | 9673.00 SLC25A44  | 5090.00 | 7.09  | 4.45  |
| 50052.00 N10 | M-032236- G protein regulated   | 9721.00 GPRIN2    | 3978.00 | 6.16  | 3.52  |
| 50052.00 N11 | M-014187- KIAA0040              | 9674.00 KIAA0040  | 2055.00 | 0.19  | 2.45  |
| 50052.00 N12 | M-023028- KIAA0565 gene pro     | 9720.00 KIAA0565  | 532.00  | 6.20  | 3.56  |
| 50052.00 N13 | M-014188- KIAA0406              | 9675.00 KIAA0406  | 3329.00 | 3.27  | 0.63  |
| 50052.00 N14 | M-022626- SEC14-like 5 (S. cere | 9717.00 SEC14L5   | 3050.00 | 5.02  | 2.38  |
| 50052.00 N15 | M-004786- histidine acid phosph | 9677.00 HISPPD2A  | 4901.00 | 5.43  | 2.79  |
| 50052.00 N16 | M-022214- aquarius homolog (I   | 9716.00 AQR       | 2622.00 | 3.17  | 0.53  |
| 50052.00 N17 | M-020678- PHD finger protein :  | 9678.00 PHF14     | 2636.00 | 1.21  | 1.43  |
| 50052.00 N18 | M-020927- family with sequenc   | 9715.00 FAM131B   | 558.00  | 2.15  | 0.49  |
| 50052.00 N19 | M-020690- family with sequenc   | 9679.00 FAM53B    | 3900.00 | 3.13  | 0.49  |
| 50052.00 N20 | M-020925- USP6 N-terminal lik   | 9712.00 USP6NL    | 367.00  | 28.61 | 25.97 |
| 50052.00 N21 | M-020708- DEP domain contair    | 9681.00 DEPDC5    | 1753.00 | 1.26  | 1.39  |
| 50052.00 N23 | M-004292- jumonji domain con    | 9682.00 JMJD2A    | 2182.00 | 1.33  | 1.31  |
| 50052.00 O02 | M-012682- numb homolog (Drc     | 9253.00 NUMBL     | 2947.00 | 3.63  | 0.99  |

|              |                                  |                   |         |       |      |
|--------------|----------------------------------|-------------------|---------|-------|------|
| 50052.00 O04 | M-008656- dehydrogenase/red      | 9249.00 DHRS3     | 6112.00 | 8.92  | 6.28 |
| 50052.00 O05 | M-012060- peptidylglycine alph   | 9182.00 PAMCI     | 3469.00 | 2.97  | 0.33 |
| 50052.00 O06 | M-011923- glucosaminyl (N-acc    | 9245.00 GCNT3     | 4110.00 | 5.35  | 2.71 |
| 50052.00 O07 | M-007464- solute carrier family  | 9187.00 SLC24A1   | 2937.00 | 2.08  | 0.56 |
| 50052.00 O08 | M-009640- discs, large (Drosop   | 9228.00 DLGAP2    | 2962.00 | 4.93  | 2.29 |
| 50052.00 O09 | M-011919- DEAD (Asp-Glu-Ala-     | 9188.00 DDX21     | 3079.00 | 2.47  | 0.17 |
| 50052.00 O10 | M-021382- VAMP (vesicle-asso     | 9218.00 VAPA      | 3476.00 | 2.91  | 0.27 |
| 50052.00 O11 | M-012679- zinc finger, BED-ty    | 9189.00 ZBED1     | 2545.00 | 2.59  | 0.05 |
| 50052.00 O12 | M-017795- VAMP (vesicle-asso     | 9217.00 VAPB      | 3180.00 | 6.76  | 4.12 |
| 50052.00 O13 | M-007409- solute carrier family  | 9194.00 SLC16A7   | 2934.00 | 7.43  | 4.79 |
| 50052.00 O14 | M-020113- leucine rich repeat (  | 9209.00 LRRFIP2   | 2829.00 | 1.98  | 0.66 |
| 50052.00 O15 | M-007533- solute carrier family  | 9197.00 SLC33A1   | 2195.00 | 3.55  | 0.91 |
| 50052.00 O16 | M-019842- leucine rich repeat (  | 9208.00 LRRFIP1   | 4960.00 | 7.60  | 4.96 |
| 50052.00 O17 | M-019932- zinc finger, MYM-ty    | 9202.00 ZMYM4     | 3395.00 | 3.95  | 1.31 |
| 50052.00 O18 | M-020648- zinc finger, MYM-ty    | 9205.00 ZMYM5     | 2269.00 | 5.24  | 2.60 |
| 50052.00 O19 | M-013117- histone cluster 1, H   | 8969.00 HIST1H2AC | 3508.00 | 3.14  | 0.50 |
| 50052.00 O20 | M-016304- zinc finger, MYM-ty    | 9204.00 ZMYM6     | 3290.00 | 3.47  | 0.83 |
| 50052.00 O21 | M-010978- thymosin, beta 4, Y-   | 9087.00 TMSB4Y    | 2175.00 | 7.77  | 5.13 |
| 50052.00 O23 | M-019933- zinc finger, MYM-ty    | 9203.00 ZMYM3     | 2341.00 | 2.90  | 0.26 |
| 50052.00 P02 | M-023538- KIAA0226               | 9711.00 KIAA0226  | 1738.00 | 3.86  | 1.22 |
| 50052.00 P04 | M-020920- KIAA0355               | 9710.00 KIAA0355  | 2539.00 | 0.79  | 1.85 |
| 50052.00 P05 | M-020733- Nedd4 binding prot     | 9683.00 N4BP1     | 3603.00 | 2.22  | 0.42 |
| 50052.00 P06 | M-020904- centrosomal protei     | 9707.00 Cep290    | 1976.00 | 0.91  | 1.73 |
| 50052.00 P07 | M-021406- clathrin interactor 1  | 9685.00 CLINT1    | 1400.00 | 2.86  | 0.22 |
| 50052.00 P08 | M-008451- suppression of tum     | 9705.00 ST18      | 2367.00 | 3.89  | 1.25 |
| 50052.00 P09 | M-023447- vestigial like 4 (Dros | 9686.00 VGLL4     | 4066.00 | 2.61  | 0.03 |
| 50052.00 P10 | M-032233- DEAH (Asp-Glu-Ala-     | 9704.00 DHX34     | 2113.00 | 1.89  | 0.75 |
| 50052.00 P11 | M-008187- GREB1 protein          | 9687.00 GREB1     | 1960.00 | 3.01  | 0.37 |
| 50052.00 P12 | M-023289- KIAA0100               | 9703.00 KIAA0100  | 1669.00 | 3.24  | 0.60 |
| 50052.00 P13 | M-020767- nucleoporin 93kDa      | 9688.00 NUP93     | 1284.00 | 2.80  | 0.16 |
| 50052.00 P14 | M-020885- centrosomal protei     | 9702.00 CEP57     | 1205.00 | 3.32  | 0.68 |
| 50052.00 P15 | M-020787- basic leucine zipper   | 9689.00 BZW1      | 2037.00 | 1.96  | 0.68 |
| 50052.00 P16 | M-021331- SAPS domain family     | 9701.00 SAPS2     | 1860.00 | 1.83  | 0.81 |
| 50052.00 P17 | M-020859- KIAA0391               | 9692.00 KIAA0391  | 2869.00 | 3.17  | 0.53 |
| 50052.00 P18 | M-004104- extra spindle pole b   | 9700.00 ESPL1     | 1579.00 | 1.01  | 1.63 |
| 50052.00 P19 | M-010631- tetratricopeptide re   | 9694.00 TTC35     | 3232.00 | 4.55  | 1.91 |
| 50052.00 P20 | M-006665- regulating synaptic    | 9699.00 RIMS2     | 1252.00 | 4.79  | 2.15 |
| 50052.00 P21 | M-021651- ciliary rootlet coiled | 9696.00 CROCC     | 2164.00 | 5.13  | 2.49 |
| 50052.00 P23 | M-014179- pumilio homolog 1      | 9698.00 PUM1      | 1851.00 | 2.92  | 0.28 |
|              |                                  |                   | 3117.50 | 2.64  | 1.10 |
|              |                                  |                   |         |       | 3.31 |
|              |                                  |                   |         |       | 1.63 |
|              |                                  |                   | MADc    |       |      |
| 50052.00 C22 |                                  |                   | 2079.00 | 16.21 |      |
| 50052.00 D22 |                                  |                   | 4655.00 | 16.97 |      |
| 50052.00 E22 |                                  |                   | 3449.00 | 14.73 |      |
| 50052.00 F22 |                                  |                   | 4333.00 | 17.26 |      |
|              |                                  | mn                | 3629.00 | 16.29 |      |

|              |                                            |                   |         |       |
|--------------|--------------------------------------------|-------------------|---------|-------|
|              |                                            | sd                | 1152.27 | 1.13  |
| 50052.00 G22 |                                            |                   | 1453.00 | 2.89  |
| 50052.00 H22 |                                            |                   | 1017.00 | 3.24  |
| 50052.00 I22 |                                            |                   | 581.00  | 5.16  |
| 50052.00 J22 |                                            |                   | 1004.00 | 2.59  |
|              |                                            | mn                | 867.33  | 3.67  |
|              |                                            | sd                | 248.06  | 1.34  |
|              |                                            | 3psSD             |         | 3.40  |
|              |                                            | 3ngSD             |         | 4.01  |
|              |                                            | SumSD             |         | 7.41  |
|              |                                            | DiffMn            |         | 12.63 |
|              |                                            | SmovrDiff         |         | 0.59  |
|              |                                            | 1minus            |         | 0.41  |
| 50052.00 G03 | M-003290- polo-like kinase 1 (L            | 5347.00 PLK1 SMAR | 199.00  | 1.51  |
| 50052.00 H03 | M-003290- polo-like kinase 1 (L            | 5347.00 PLK1 SMAR | 5911.00 | 7.31  |
| 50052.00 I03 | D-001206-: siControl non-targeting siRNA # |                   | 5033.00 | 4.09  |
| 50052.00 J03 | D-001206-: siControl non-targeting siRNA # |                   | 2408.00 | 3.24  |
| 50052.00 K03 | D-001600-( siGLO RISC-free siRNA           |                   | 5377.00 | 3.91  |
| 50052.00 L03 | D-001600-( siGLO RISC-free siRNA           |                   | 5425.00 | 3.58  |



| rZ    | Cell Count | % inf | Abs Dev | rZ    | Cell Count | % inf | Abs Dev | rZ    |
|-------|------------|-------|---------|-------|------------|-------|---------|-------|
| 0.70  | 2254.00    | 0.71  | 2.50    | -1.42 | 2581.00    | 1.51  | 1.53    | -0.68 |
| -0.43 | 1594.00    | 0.88  | 2.33    | -1.32 | 2045.00    | 0.98  | 2.06    | -0.92 |
| 0.45  | 2099.00    | 0.76  | 2.45    | -1.39 | 1451.00    | 1.93  | 1.11    | -0.49 |
| -0.25 | 1477.00    | 0.68  | 2.53    | -1.43 | 859.00     | 1.05  | 1.99    | -0.88 |
| -1.03 | 2904.00    | 1.00  | 2.21    | -1.25 | 2024.00    | 1.38  | 1.66    | -0.74 |
| 0.82  | 3407.00    | 1.82  | 1.39    | -0.79 | 3928.00    | 0.71  | 2.33    | -1.03 |
| 0.69  | 2891.00    | 2.94  | 0.27    | -0.15 | 3918.00    | 1.17  | 1.87    | -0.83 |
| 2.09  | 3439.00    | 2.62  | 0.59    | -0.34 | 4124.00    | 1.29  | 1.75    | -0.78 |
| 0.28  | 1602.00    | 2.31  | 0.90    | -0.51 | 1436.00    | 3.83  | 0.79    | 0.35  |
| -0.04 | 545.00     | 5.32  | 2.11    | 1.20  | 619.00     | 2.10  | 0.94    | -0.42 |
| 0.38  | 293.00     | 6.83  | 3.62    | 2.05  | 978.00     | 1.12  | 1.92    | -0.85 |
| -1.26 | 1326.00    | 4.00  | 0.79    | 0.45  | 2314.00    | 0.35  | 2.69    | -1.20 |
| -0.18 | 1455.00    | 3.44  | 0.23    | 0.13  | 1557.00    | 0.64  | 2.40    | -1.06 |
| -1.05 | 2255.00    | 4.66  | 1.45    | 0.82  | 2975.00    | 0.97  | 2.07    | -0.92 |
| -0.31 | 276.00     | 4.35  | 1.14    | 0.65  | 436.00     | 3.44  | 0.40    | 0.18  |
| 2.03  | 949.00     | 2.32  | 0.89    | -0.50 | 1798.00    | 0.83  | 2.21    | -0.98 |
| -0.09 | 1863.00    | 10.31 | 7.10    | 4.02  | 2182.00    | 1.19  | 1.85    | -0.82 |
| -0.81 | 4205.00    | 2.47  | 0.74    | -0.42 | 4404.00    | 2.41  | 0.63    | -0.28 |
| 0.28  | 1618.00    | 3.34  | 0.13    | 0.07  | 1348.00    | 0.59  | 2.45    | -1.09 |
| -0.56 | 1615.00    | 3.22  | 0.01    | 0.01  | 1814.00    | 0.77  | 2.27    | -1.01 |
| -0.72 | 2555.00    | 3.21  | 0.00    | 0.00  | 2650.00    | 1.28  | 1.76    | -0.78 |
| -1.48 | 2279.00    | 3.12  | 0.09    | -0.05 | 1388.00    | 1.66  | 1.38    | -0.61 |
| -1.43 | 2984.00    | 1.47  | 1.74    | -0.98 | 2688.00    | 1.53  | 1.51    | -0.67 |
| 0.46  | 3206.00    | 2.96  | 0.25    | -0.14 | 2479.00    | 3.47  | 0.43    | 0.19  |
| 0.39  | 3200.00    | 5.53  | 2.32    | 1.32  | 2809.00    | 1.57  | 1.47    | -0.65 |
| -0.93 | 2346.00    | 1.53  | 1.68    | -0.95 | 1764.00    | 3.23  | 0.19    | 0.09  |
| -0.44 | 1839.00    | 4.08  | 0.87    | 0.49  | 1569.00    | 1.72  | 1.32    | -0.59 |
| -0.82 | 2294.00    | 2.44  | 0.77    | -0.43 | 3170.00    | 0.91  | 2.13    | -0.94 |
| 0.60  | 3945.00    | 2.86  | 0.35    | -0.19 | 2863.00    | 3.14  | 0.10    | 0.05  |
| -0.63 | 3145.00    | 2.64  | 0.57    | -0.32 | 1874.00    | 3.84  | 0.80    | 0.36  |
| 0.05  | 2774.00    | 4.15  | 0.94    | 0.53  | 2054.00    | 1.95  | 1.09    | -0.48 |
| -1.16 | 1068.00    | 4.96  | 1.75    | 0.99  | 1849.00    | 1.41  | 1.63    | -0.73 |
| -1.47 | 2433.00    | 1.19  | 2.02    | -1.14 | 2477.00    | 1.98  | 1.06    | -0.47 |
| -0.13 | 2910.00    | 4.06  | 0.85    | 0.48  | 3259.00    | 4.33  | 1.29    | 0.57  |
| 0.24  | 1917.00    | 3.39  | 0.18    | 0.10  | 1198.00    | 3.42  | 0.38    | 0.17  |
| 1.28  | 3772.00    | 3.08  | 0.13    | -0.08 | 3031.00    | 4.45  | 1.41    | 0.63  |
| -0.60 | 4273.00    | 1.26  | 1.95    | -1.10 | 4337.00    | 1.29  | 1.75    | -0.78 |
| -0.05 | 3208.00    | 1.75  | 1.46    | -0.83 | 2034.00    | 2.06  | 0.98    | -0.43 |
| 0.95  | 4079.00    | 1.64  | 1.57    | -0.89 | 3008.00    | 4.12  | 1.08    | 0.48  |
| -0.33 | 1797.00    | 2.78  | 0.43    | -0.24 | 1800.00    | 4.11  | 1.07    | 0.48  |
| -0.94 | 3163.00    | 3.16  | 0.05    | -0.03 | 2878.00    | 3.96  | 0.92    | 0.41  |
| 0.47  | 3550.00    | 4.59  | 1.38    | 0.78  | 3068.00    | 0.95  | 2.09    | -0.93 |
| -0.06 | 3181.00    | 3.49  | 0.28    | 0.16  | 4459.00    | 2.53  | 0.51    | -0.22 |
| -1.28 | 4218.00    | 3.67  | 0.46    | 0.26  | 3626.00    | 1.38  | 1.66    | -0.74 |
| 0.14  | 2775.00    | 2.27  | 0.94    | -0.53 | 3778.00    | 2.70  | 0.34    | -0.15 |
| -0.71 | 1322.00    | 3.25  | 0.04    | 0.03  | 2600.00    | 2.00  | 1.04    | -0.46 |

|       |         |      |      |       |         |      |      |        |
|-------|---------|------|------|-------|---------|------|------|--------|
| -0.21 | 2632.00 | 2.77 | 0.44 | -0.25 | 4866.00 | 2.61 | 0.43 | -0.19  |
| -1.39 | 970.00  | 7.32 | 4.11 | 2.33  | 2971.00 | 1.45 | 1.59 | -0.71  |
| -0.03 | 2896.00 | 3.31 | 0.10 | 0.06  | 3989.00 | 0.83 | 2.21 | -0.98  |
| -0.37 | 1769.00 | 5.99 | 2.78 | 1.58  | 1763.00 | 1.02 | 2.02 | -0.90  |
| -0.32 | 1537.00 | 5.34 | 2.13 | 1.21  | 2687.00 | 1.15 | 1.89 | -0.84  |
| -0.93 | 1397.00 | 9.16 | 5.95 | 3.38  | 1761.00 | 1.42 | 1.62 | -0.72  |
| 1.01  | 2343.00 | 8.79 | 5.58 | 3.17  | 3686.00 | 2.25 | 0.79 | -0.35  |
| -0.22 | 1918.00 | 3.18 | 0.03 | -0.02 | 3333.00 | 1.08 | 1.96 | -0.87  |
| -0.52 | 2608.00 | 3.53 | 0.32 | 0.18  | 3785.00 | 0.40 | 2.64 | -1.17  |
| 2.02  | 2303.00 | 5.47 | 2.26 | 1.28  | 2776.00 | 2.70 | 0.34 | -0.15  |
| 3.39  | 1567.00 | 3.25 | 0.04 | 0.03  | 2259.00 | 2.35 | 0.69 | -0.31  |
| 1.12  | 3093.00 | 5.21 | 2.00 | 1.13  | 3570.00 | 1.46 | 1.58 | -0.70  |
| 0.40  | 2881.00 | 1.67 | 1.54 | -0.87 | 3077.00 | 1.37 | 1.68 | -0.74  |
| 1.15  | 2942.00 | 1.63 | 1.58 | -0.89 | 4585.00 | 0.24 | 2.80 | -1.24  |
| -1.59 | 3392.00 | 2.45 | 0.76 | -0.43 | 3600.00 | 1.81 | 1.23 | -0.55  |
| -0.29 | 4087.00 | 5.73 | 2.52 | 1.43  | 4496.00 | 2.78 | 0.26 | -0.11  |
| -0.09 | 3646.00 | 3.79 | 0.58 | 0.33  | 4088.00 | 2.74 | 0.30 | -0.13  |
| -0.89 | 1598.00 | 2.25 | 0.96 | -0.54 | 3940.00 | 0.86 | 2.18 | -0.97  |
| -0.92 | 3626.00 | 3.61 | 0.40 | 0.23  | 3796.00 | 2.63 | 0.41 | -0.18  |
| -1.03 | 1605.00 | 5.23 | 2.02 | 1.15  | 1920.00 | 4.53 | 1.49 | 0.66   |
| 0.11  | 2312.00 | 3.72 | 0.51 | 0.29  | 2789.00 | 3.08 | 0.04 | 0.02   |
| -0.30 | 1952.00 | 4.61 | 1.40 | 0.79  | 4488.00 | 5.17 | 2.13 | 0.95   |
| -0.74 | 2461.00 | 5.93 | 2.72 | 1.54  | 2929.00 | 2.25 | 0.79 | -0.35  |
| -0.50 | 1730.00 | 4.57 | 1.36 | 0.77  | 2207.00 | 0.95 | 2.09 | -0.93  |
| 0.05  | 2620.00 | 5.73 | 2.52 | 1.43  | 2800.00 | 1.75 | 1.29 | -0.57  |
| 0.41  | 2578.00 | 5.28 | 2.07 | 1.17  | 3013.00 | 4.91 | 1.87 | 0.83   |
| -0.67 | 2934.00 | 2.25 | 0.96 | -0.54 | 3001.00 | 0.90 | 2.14 | -0.95  |
| 1.06  | 2278.00 | 7.46 | 4.25 | 2.41  | 3800.00 | 4.61 | 1.57 | 0.70   |
| -0.88 | 2134.00 | 4.59 | 1.38 | 0.78  | 2690.00 | 1.60 | 1.44 | -0.64  |
| -0.83 | 2759.00 | 4.17 | 0.96 | 0.54  | 4165.00 | 0.50 | 2.54 | -1.13  |
| -0.56 | 3017.00 | 4.01 | 0.80 | 0.45  | 4625.00 | 0.93 | 2.11 | -0.94  |
| -0.58 | 1752.00 | 1.14 | 2.07 | -1.17 | 2474.00 | 1.33 | 1.71 | -0.76  |
| 0.95  | 2968.00 | 5.86 | 2.65 | 1.50  | 4955.00 | 1.70 | 1.34 | -0.60  |
| 1.23  | 2032.00 | 4.48 | 1.27 | 0.72  | 3975.00 | 2.82 | 0.22 | -0.10  |
| 3.32  | 3633.00 | 5.84 | 2.63 | 1.49  | 3881.00 | 3.84 | 0.80 | 0.36   |
| 2.54  | 3781.00 | 2.06 | 1.15 | -0.65 | 2248.00 | 3.16 | 0.12 | 0.05   |
| -0.76 | 2410.00 | 2.57 | 0.64 | -0.36 | 2104.00 | 3.33 | 0.29 | 0.13   |
| 0.00  | 2177.00 | 5.60 | 2.39 | 1.36  | 2935.00 | 4.19 | 1.15 | 0.51   |
| 0.21  | 891.00  | 8.19 | 4.98 | 2.83  | 688.00  | 9.74 | 6.70 | 2.98 x |
| 3.46  | 5224.00 | 5.21 | 2.00 | 1.13  | 5523.00 | 4.13 | 1.09 | 0.49   |
| -0.74 | 950.00  | 4.95 | 1.74 | 0.99  | 2316.00 | 5.05 | 2.01 | 0.90   |
| 0.88  | 1992.00 | 5.27 | 2.06 | 1.17  | 3082.00 | 3.24 | 0.20 | 0.09   |
| -0.88 | 762.00  | 5.77 | 2.56 | 1.45  | 1281.00 | 4.92 | 1.88 | 0.84   |
| 0.17  | 2030.00 | 2.66 | 0.55 | -0.31 | 3149.00 | 2.45 | 0.59 | -0.26  |
| 0.69  | 938.00  | 3.84 | 0.63 | 0.36  | 733.00  | 2.86 | 0.18 | -0.08  |
| 0.46  | 2048.00 | 1.71 | 1.50 | -0.85 | 2619.00 | 7.71 | 4.67 | 2.08   |
| -0.51 | 1475.00 | 3.12 | 0.09 | -0.05 | 3228.00 | 1.61 | 1.43 | -0.63  |

|       |         |      |      |       |         |      |      |        |
|-------|---------|------|------|-------|---------|------|------|--------|
| 2.17  | 4361.00 | 2.89 | 0.32 | -0.18 | 4961.00 | 5.30 | 2.26 | 1.01   |
| 1.65  | 1412.00 | 3.47 | 0.26 | 0.15  | 2175.00 | 5.79 | 2.75 | 1.23   |
| -0.36 | 2157.00 | 4.64 | 1.43 | 0.81  | 3046.00 | 4.40 | 1.36 | 0.61   |
| 1.18  | 1950.00 | 1.69 | 1.52 | -0.86 | 2515.00 | 1.99 | 1.05 | -0.47  |
| -1.09 | 1306.00 | 8.50 | 5.29 | 3.00  | 1616.00 | 3.03 | 0.01 | 0.00   |
| 0.36  | 2980.00 | 3.19 | 0.02 | -0.01 | 3830.00 | 2.77 | 0.27 | -0.12  |
| 0.77  | 2647.00 | 2.80 | 0.41 | -0.23 | 3016.00 | 2.98 | 0.06 | -0.02  |
| -0.67 | 3943.00 | 0.99 | 2.22 | -1.26 | 3448.00 | 3.07 | 0.03 | 0.02   |
| 1.06  | 2302.00 | 2.30 | 0.91 | -0.51 | 2085.00 | 2.01 | 1.03 | -0.45  |
| -0.54 | 2569.00 | 1.87 | 1.34 | -0.76 | 3207.00 | 2.34 | 0.70 | -0.31  |
| -0.34 | 1846.00 | 3.95 | 0.74 | 0.42  | 2578.00 | 2.83 | 0.21 | -0.09  |
| -0.33 | 2272.00 | 2.86 | 0.35 | -0.20 | 2505.00 | 5.55 | 2.51 | 1.12   |
| 2.13  | 4365.00 | 3.12 | 0.09 | -0.05 | 3713.00 | 4.20 | 1.16 | 0.52   |
| 0.07  | 1690.00 | 3.79 | 0.58 | 0.33  | 1535.00 | 3.84 | 0.80 | 0.36   |
| 0.04  | 2024.00 | 2.52 | 0.69 | -0.39 | 3324.00 | 3.01 | 0.03 | -0.01  |
| -0.53 | 2050.00 | 2.20 | 1.01 | -0.57 | 2228.00 | 1.71 | 1.33 | -0.59  |
| -0.44 | 1772.00 | 1.30 | 1.91 | -1.08 | 1448.00 | 4.21 | 1.17 | 0.52   |
| 0.00  | 1248.00 | 1.84 | 1.37 | -0.77 | 910.00  | 4.07 | 1.03 | 0.46   |
| 0.03  | 1688.00 | 1.78 | 1.43 | -0.81 | 2081.00 | 2.50 | 0.54 | -0.24  |
| 0.03  | 1928.00 | 1.87 | 1.34 | -0.76 | 2174.00 | 2.35 | 0.69 | -0.31  |
| 0.57  | 2601.00 | 1.85 | 1.36 | -0.77 | 2875.00 | 3.65 | 0.61 | 0.27   |
| -0.45 | 1713.00 | 2.80 | 0.41 | -0.23 | 1076.00 | 2.97 | 0.07 | -0.03  |
| 1.03  | 3937.00 | 4.06 | 0.85 | 0.49  | 4020.00 | 5.17 | 2.13 | 0.95   |
| 0.00  | 3552.00 | 2.45 | 0.76 | -0.43 | 4244.00 | 3.94 | 0.90 | 0.40   |
| 1.10  | 2725.00 | 6.94 | 3.73 | 2.11  | 1922.00 | 4.58 | 1.54 | 0.69   |
| -0.40 | 3070.00 | 2.77 | 0.44 | -0.25 | 1613.00 | 1.98 | 1.06 | -0.47  |
| -0.38 | 3017.00 | 4.44 | 1.23 | 0.70  | 4112.00 | 1.97 | 1.07 | -0.47  |
| -1.16 | 3578.00 | 0.95 | 2.26 | -1.28 | 2703.00 | 1.04 | 2.00 | -0.89  |
| -1.19 | 2214.00 | 1.04 | 2.17 | -1.23 | 1814.00 | 1.10 | 1.94 | -0.86  |
| -0.57 | 473.00  | 3.81 | 0.60 | 0.34  | 462.00  | 6.28 | 3.24 | 1.44   |
| -0.61 | 2715.00 | 1.95 | 1.26 | -0.71 | 2708.00 | 1.48 | 1.56 | -0.69  |
| -0.54 | 2426.00 | 0.87 | 2.34 | -1.33 | 2909.00 | 2.89 | 0.15 | -0.07  |
| -0.44 | 1581.00 | 1.08 | 2.13 | -1.21 | 1404.00 | 1.64 | 1.40 | -0.62  |
| -0.15 | 3288.00 | 2.59 | 0.62 | -0.35 | 3303.00 | 5.03 | 1.99 | 0.88   |
| -1.05 | 1879.00 | 1.70 | 1.51 | -0.85 | 1844.00 | 1.90 | 1.14 | -0.51  |
| -0.87 | 1882.00 | 3.88 | 0.67 | 0.38  | 1914.00 | 1.99 | 1.05 | -0.47  |
| -0.20 | 4892.00 | 8.91 | 5.70 | 3.23  | 4622.00 | 5.67 | 2.63 | 1.17   |
| -1.02 | 2341.00 | 1.79 | 1.42 | -0.80 | 1311.00 | 1.45 | 1.59 | -0.71  |
| 1.52  | 5139.00 | 8.81 | 5.60 | 3.18  | 4387.00 | 9.53 | 6.49 | 2.89 y |
| 1.22  | 4019.00 | 7.04 | 3.83 | 2.17  | 3635.00 | 4.13 | 1.09 | 0.48   |
| -0.69 | 2282.00 | 4.95 | 1.74 | 0.99  | 1608.00 | 1.99 | 1.05 | -0.47  |
| -0.76 | 1709.00 | 0.82 | 2.39 | -1.35 | 1837.00 | 1.42 | 1.62 | -0.72  |
| 1.24  | 5070.00 | 6.71 | 3.50 | 1.98  | 5555.00 | 6.35 | 3.31 | 1.48   |
| 0.02  | 2223.00 | 3.73 | 0.52 | 0.30  | 2634.00 | 5.62 | 2.58 | 1.15   |
| 1.31  | 5722.00 | 5.77 | 2.56 | 1.45  | 6535.00 | 5.91 | 2.87 | 1.28   |
| 0.51  | 4224.00 | 2.98 | 0.23 | -0.13 | 4539.00 | 2.45 | 0.59 | -0.26  |
| -1.42 | 1667.00 | 2.22 | 0.99 | -0.56 | 3617.00 | 1.27 | 1.77 | -0.78  |

|       |         |       |       |       |         |       |       |        |
|-------|---------|-------|-------|-------|---------|-------|-------|--------|
| -0.13 | 4104.00 | 2.95  | 0.26  | -0.15 | 3962.00 | 3.61  | 0.57  | 0.25   |
| 1.08  | 5392.00 | 1.67  | 1.54  | -0.87 | 4500.00 | 1.82  | 1.22  | -0.54  |
| 2.53  | 3810.00 | 3.39  | 0.18  | 0.10  | 3451.00 | 2.93  | 0.11  | -0.05  |
| -0.56 | 2447.00 | 2.29  | 0.92  | -0.52 | 1852.00 | 4.64  | 1.60  | 0.71   |
| 1.69  | 5758.00 | 8.48  | 5.27  | 2.99  | 5169.00 | 5.75  | 2.71  | 1.20   |
| -1.11 | 2855.00 | 3.29  | 0.08  | 0.05  | 2993.00 | 4.64  | 1.60  | 0.71   |
| -0.76 | 3455.00 | 2.72  | 0.49  | -0.28 | 2588.00 | 1.85  | 1.19  | -0.53  |
| 1.41  | 1986.00 | 5.19  | 1.98  | 1.12  | 2092.00 | 3.11  | 0.07  | 0.03   |
| 1.57  | 3002.00 | 2.53  | 0.68  | -0.38 | 2379.00 | 1.43  | 1.61  | -0.71  |
| -0.22 | 2499.00 | 3.16  | 0.05  | -0.03 | 1329.00 | 1.96  | 1.08  | -0.48  |
| 0.32  | 1935.00 | 4.03  | 0.82  | 0.47  | 2044.00 | 1.47  | 1.57  | -0.70  |
| -0.02 | 995.00  | 3.52  | 0.31  | 0.18  | 2167.00 | 1.20  | 1.84  | -0.82  |
| -0.02 | 1433.00 | 87.23 | 84.02 | 47.63 | 2442.00 | 2.54  | 0.50  | -0.22  |
| 1.07  | 1534.00 | 2.80  | 0.41  | -0.23 | 869.00  | 1.96  | 1.08  | -0.48  |
| -0.42 | 1855.00 | 2.32  | 0.89  | -0.50 | 1443.00 | 0.35  | 2.69  | -1.20  |
| 0.27  | 3500.00 | 9.26  | 6.05  | 3.43  | 2348.00 | 4.64  | 1.60  | 0.71   |
| -0.99 | 4305.00 | 2.79  | 0.42  | -0.24 | 4386.00 | 1.57  | 1.47  | -0.65  |
| -0.01 | 4135.00 | 7.71  | 4.50  | 2.55  | 2587.00 | 1.12  | 1.92  | -0.85  |
| -0.28 | 4939.00 | 10.51 | 7.30  | 4.14  | 4105.00 | 2.07  | 0.97  | -0.43  |
| -0.09 | 4696.00 | 3.75  | 0.54  | 0.31  | 5139.00 | 2.63  | 0.41  | -0.18  |
| 0.88  | 4609.00 | 3.08  | 0.13  | -0.07 | 4185.00 | 6.12  | 3.08  | 1.37   |
| -0.80 | 2817.00 | 2.34  | 0.87  | -0.49 | 2718.00 | 6.00  | 2.96  | 1.32   |
| -1.22 | 1769.00 | 1.30  | 1.91  | -1.08 | 1942.00 | 2.06  | 0.98  | -0.43  |
| 0.03  | 2738.00 | 1.53  | 1.68  | -0.95 | 2141.00 | 7.19  | 4.15  | 1.85   |
| -0.66 | 2142.00 | 2.89  | 0.32  | -0.18 | 1715.00 | 7.99  | 4.95  | 2.20   |
| 0.83  | 1371.00 | 8.83  | 5.62  | 3.18  | 988.00  | 12.55 | 9.51  | 4.23 x |
| 1.37  | 2278.00 | 7.46  | 4.25  | 2.41  | 2022.00 | 6.33  | 3.29  | 1.46   |
| 0.85  | 5279.00 | 7.26  | 4.05  | 2.29  | 5926.00 | 8.34  | 5.30  | 2.36 y |
| 0.75  | 2410.00 | 3.03  | 0.18  | -0.10 | 2192.00 | 4.33  | 1.29  | 0.58   |
| 0.72  | 2279.00 | 2.33  | 0.88  | -0.50 | 1632.00 | 6.99  | 3.95  | 1.76   |
| -0.93 | 1879.00 | 2.50  | 0.71  | -0.40 | 1413.00 | 7.93  | 4.89  | 2.17   |
| 0.87  | 5396.00 | 4.97  | 1.76  | 1.00  | 4259.00 | 8.99  | 5.95  | 2.65   |
| 0.63  | 2147.00 | 1.44  | 1.77  | -1.00 | 1186.00 | 10.62 | 7.58  | 3.37   |
| -0.68 | 3735.00 | 5.17  | 1.96  | 1.11  | 2182.00 | 6.05  | 3.01  | 1.34   |
| -0.37 | 2949.00 | 4.44  | 1.23  | 0.70  | 1215.00 | 4.28  | 1.24  | 0.55   |
| 0.51  | 3561.00 | 2.44  | 0.77  | -0.43 | 2258.00 | 4.30  | 1.26  | 0.56   |
| 1.42  | 2963.00 | 2.16  | 1.05  | -0.59 | 1423.00 | 7.80  | 4.76  | 2.12   |
| -0.48 | 2471.00 | 2.83  | 0.38  | -0.21 | 2495.00 | 4.69  | 1.65  | 0.73   |
| -0.37 | 2957.00 | 1.86  | 1.35  | -0.76 | 1883.00 | 3.08  | 0.04  | 0.02   |
| 0.50  | 3133.00 | 3.57  | 0.36  | 0.21  | 2074.00 | 3.66  | 0.62  | 0.28   |
| 0.07  | 2333.00 | 2.06  | 1.15  | -0.65 | 1889.00 | 4.34  | 1.30  | 0.58   |
| 0.48  | 4546.00 | 3.83  | 0.62  | 0.35  | 3962.00 | 2.60  | 0.44  | -0.19  |
| 0.93  | 4482.00 | 2.32  | 0.89  | -0.50 | 2975.00 | 6.29  | 3.25  | 1.44   |
| -0.72 | 3946.00 | 3.73  | 0.52  | 0.29  | 2228.00 | 1.93  | 1.11  | -0.49  |
| 4.24  | 1034.00 | 7.54  | 4.33  | 2.46  | 832.00  | 13.46 | 10.42 | 4.64 x |
| 0.07  | 2157.00 | 2.55  | 0.66  | -0.37 | 1772.00 | 4.63  | 1.59  | 0.71   |
| 2.86  | 1782.00 | 6.17  | 2.96  | 1.68  | 1366.00 | 3.44  | 0.40  | 0.18   |

|             |                |             |              |             |                |             |              |               |
|-------------|----------------|-------------|--------------|-------------|----------------|-------------|--------------|---------------|
| 0.54        | 1343.00        | 2.76        | 0.46         | -0.26       | 1296.00        | 2.93        | 0.11         | -0.05         |
| 0.18        | 1968.00        | 2.95        | 0.26         | -0.15       | 1332.00        | 3.83        | 0.79         | 0.35          |
| -0.46       | 1368.00        | 3.07        | 0.14         | -0.08       | 1164.00        | 2.58        | 0.46         | -0.20         |
| 0.19        | 2594.00        | 1.66        | 1.55         | -0.88       | 2914.00        | 1.34        | 1.70         | -0.76         |
| <b>5.95</b> | <b>2453.00</b> | <b>8.52</b> | <b>5.31</b>  | <b>3.01</b> | <b>2564.00</b> | <b>8.81</b> | <b>5.77</b>  | <b>2.57</b> y |
| -0.19       | 1735.00        | 6.57        | 3.36         | 1.91        | 2257.00        | 4.52        | 1.48         | 0.66          |
| -0.66       | 2264.00        | 3.00        | 0.21         | -0.12       | 2767.00        | 1.95        | 1.09         | -0.48         |
| -0.69       | 2267.00        | 3.26        | 0.05         | 0.03        | 1579.00        | 2.66        | 0.38         | -0.17         |
| 0.20        | 2614.00        | 6.50        | 3.29         | 1.87        | 3087.00        | 3.37        | 0.33         | 0.15          |
| -0.13       | 1612.00        | 3.16        | 0.05         | -0.03       | 2048.00        | 3.52        | 0.48         | 0.21          |
| -0.02       | 1420.00        | 6.41        | 3.20         | 1.81        | 2624.00        | 1.91        | 1.13         | -0.50         |
| -1.06       | 2607.00        | 2.22        | 0.99         | -0.56       | 4036.00        | 1.44        | 1.60         | -0.71         |
| 1.22        | 1913.00        | 2.98        | 0.23         | -0.13       | 2275.00        | 5.36        | 2.32         | 1.03          |
| -0.63       | 3557.00        | 3.23        | 0.02         | 0.01        | 3777.00        | 2.28        | 0.76         | -0.34         |
| -0.80       | 3366.00        | 2.91        | 0.30         | -0.17       | 2349.00        | 3.96        | 0.92         | 0.41          |
| 0.99        | 3235.00        | 3.09        | 0.12         | -0.07       | 2674.00        | 5.46        | 2.42         | 1.08          |
| -1.29       | 3483.00        | 3.04        | 0.17         | -0.09       | 3495.00        | 1.55        | 1.49         | -0.66         |
| -0.26       | 1769.00        | 6.33        | 3.12         | 1.77        | 1810.00        | 4.97        | 1.93         | 0.86          |
| 0.31        | 1029.00        | 3.21        | 0.00         | 0.00        | 772.00         | 12.69       | <b>9.65</b>  | <b>4.29</b>   |
| -0.30       | 2112.00        | 3.93        | 0.72         | 0.41        | 2029.00        | 9.46        | <b>6.42</b>  | <b>2.86</b>   |
| 0.68        | 5105.00        | 2.92        | 0.29         | -0.16       | 4408.00        | 12.34       | <b>9.30</b>  | <b>4.14</b>   |
| <b>2.02</b> | 731.00         | 4.65        | 1.44         | 0.82        | 522.00         | 9.20        | <b>6.16</b>  | <b>2.74</b> x |
| 1.55        | 635.00         | 8.03        | <b>4.82</b>  | <b>2.73</b> | 734.00         | 14.85       | <b>11.81</b> | <b>5.25</b> x |
| 0.58        | 1189.00        | 2.78        | 0.43         | -0.25       | 1095.00        | 5.75        | 2.71         | 1.21          |
| -0.73       | 1665.00        | 1.32        | 1.89         | -1.07       | 2074.00        | 6.94        | 3.90         | 1.74          |
| -0.75       | 1864.00        | 2.41        | 0.80         | -0.45       | 1692.00        | 5.85        | 2.81         | 1.25          |
| -0.12       | 2451.00        | 3.35        | 0.14         | 0.08        | 2107.00        | 4.94        | 1.90         | 0.84          |
| 0.36        | 2690.00        | 3.53        | 0.32         | 0.18        | 2034.00        | 7.82        | <b>4.78</b>  | <b>2.13</b>   |
| 1.44        | 2092.00        | 2.92        | 0.29         | -0.17       | 1868.00        | 2.68        | 0.36         | -0.16         |
| 0.27        | 1090.00        | 2.39        | 0.82         | -0.47       | 1759.00        | 3.13        | 0.09         | 0.04          |
| 0.69        | 2157.00        | 2.32        | 0.89         | -0.50       | 1677.00        | 5.01        | 1.97         | 0.88          |
| <b>2.03</b> | 2492.00        | 2.73        | 0.48         | -0.27       | 1503.00        | 7.45        | 4.41         | 1.96          |
| 1.23        | 3215.00        | 3.02        | 0.19         | -0.11       | 2788.00        | 3.98        | 0.94         | 0.42          |
| -0.58       | 2737.00        | 5.88        | 2.67         | 1.52        | 2373.00        | 2.53        | 0.51         | -0.23         |
| -0.82       | 2292.00        | 4.19        | 0.98         | 0.56        | 1025.00        | 3.90        | 0.86         | 0.38          |
| -0.36       | 1762.00        | 4.71        | 1.50         | 0.85        | 2269.00        | 5.11        | 2.07         | 0.92          |
| 0.43        | 6448.00        | 4.82        | 1.61         | 0.92        | 4915.00        | 5.05        | 2.01         | 0.89          |
| -0.62       | 3447.00        | 4.58        | 1.37         | 0.78        | 2864.00        | 1.82        | 1.22         | -0.54         |
| -0.15       | 2575.00        | 2.68        | 0.53         | -0.30       | 1733.00        | 5.71        | 2.67         | 1.19          |
| -0.93       | 3025.00        | 4.03        | 0.82         | 0.47        | 1734.00        | 3.11        | 0.07         | 0.03          |
| 0.15        | 3494.00        | 4.58        | 1.37         | 0.78        | 2461.00        | 2.19        | 0.85         | -0.37         |
| -0.38       | 2724.00        | 4.52        | 1.31         | 0.74        | 1431.00        | 6.29        | 3.25         | 1.45          |
| 1.63        | 671.00         | 18.03       | <b>14.82</b> | <b>8.40</b> | 765.00         | 7.58        | 4.54         | <b>2.02</b> x |
| -0.17       | 2669.00        | 8.09        | <b>4.88</b>  | <b>2.77</b> | 1655.00        | 6.22        | 3.18         | 1.42          |
| -0.62       | 2931.00        | 6.89        | <b>3.68</b>  | <b>2.09</b> | 2061.00        | 3.69        | 0.65         | 0.29          |
| -0.63       | 2639.00        | 5.27        | 2.06         | 1.17        | 1512.00        | 6.22        | 3.18         | 1.41          |
| 0.24        | 1349.00        | 11.27       | <b>8.06</b>  | <b>4.57</b> | 846.00         | 11.82       | <b>8.78</b>  | <b>3.91</b> x |

|       |         |      |      |       |         |       |       |        |
|-------|---------|------|------|-------|---------|-------|-------|--------|
| 0.61  | 5289.00 | 8.38 | 5.17 | 2.93  | 4720.00 | 3.92  | 0.88  | 0.39   |
| 0.74  | 4208.00 | 6.61 | 3.40 | 1.93  | 1802.00 | 4.72  | 1.68  | 0.75   |
| 0.50  | 4315.00 | 6.40 | 3.19 | 1.81  | 2792.00 | 9.99  | 6.95  | 3.09   |
| 41.03 | 2812.00 | 4.80 | 1.59 | 0.90  | 2749.00 | 5.09  | 2.05  | 0.91   |
| 2.56  | 2495.00 | 5.29 | 2.08 | 1.18  | 1223.00 | 4.99  | 1.95  | 0.87   |
| 0.71  | 3173.00 | 5.58 | 2.37 | 1.34  | 3526.00 | 4.48  | 1.44  | 0.64   |
| -1.42 | 3642.00 | 1.95 | 1.26 | -0.71 | 4635.00 | 1.81  | 1.23  | -0.54  |
| 0.91  | 6710.00 | 8.60 | 5.39 | 3.06  | 5268.00 | 3.38  | 0.34  | 0.15   |
| -0.69 | 3784.00 | 2.72 | 0.49 | -0.28 | 2106.00 | 2.61  | 0.43  | -0.19  |
| -1.20 | 3204.00 | 4.56 | 1.35 | 0.76  | 2201.00 | 1.59  | 1.45  | -0.64  |
| -1.02 | 2012.00 | 1.49 | 1.72 | -0.97 | 2071.00 | 1.93  | 1.11  | -0.49  |
| -0.71 | 2463.00 | 2.19 | 1.02 | -0.58 | 1533.00 | 1.44  | 1.60  | -0.71  |
| -1.10 | 3475.00 | 3.17 | 0.04 | -0.02 | 2229.00 | 0.94  | 2.10  | -0.93  |
| 1.05  | 4608.00 | 4.97 | 1.76 | 1.00  | 2993.00 | 9.09  | 6.05  | 2.69   |
| -0.09 | 2925.00 | 3.97 | 0.76 | 0.43  | 2249.00 | 2.09  | 0.95  | -0.42  |
| -0.22 | 2324.00 | 1.33 | 1.88 | -1.06 | 2221.00 | 2.39  | 0.65  | -0.29  |
| -0.77 | 1605.00 | 2.62 | 0.59 | -0.34 | 1447.00 | 4.98  | 1.94  | 0.86   |
| 1.69  | 2195.00 | 8.75 | 5.54 | 3.14  | 2933.00 | 7.60  | 4.56  | 2.03 x |
| 1.85  | 2201.00 | 7.18 | 3.97 | 2.25  | 1360.00 | 6.47  | 3.43  | 1.53   |
| -0.88 | 2353.00 | 1.91 | 1.30 | -0.73 | 1161.00 | 1.81  | 1.23  | -0.55  |
| -0.29 | 2712.00 | 0.26 | 2.95 | -1.67 | 1280.00 | 3.83  | 0.79  | 0.35   |
| -0.08 | 2472.00 | 4.49 | 1.28 | 0.73  | 1499.00 | 10.87 | 7.83  | 3.48   |
| 0.16  | 2539.00 | 4.10 | 0.89 | 0.50  | 2385.00 | 3.14  | 0.10  | 0.05   |
| 29.35 | 4006.00 | 5.97 | 2.76 | 1.56  | 1459.00 | 7.13  | 4.09  | 1.82   |
| 0.51  | 2667.00 | 5.25 | 2.04 | 1.16  | 2176.00 | 3.58  | 0.54  | 0.24   |
| 4.48  | 3495.00 | 2.80 | 0.41 | -0.23 | 2583.00 | 4.72  | 1.68  | 0.75   |
| -1.24 | 2906.00 | 1.10 | 2.11 | -1.19 | 2304.00 | 1.35  | 1.69  | -0.75  |
| -0.88 | 3311.00 | 2.11 | 1.10 | -0.62 | 2079.00 | 3.99  | 0.95  | 0.42   |
| -0.16 | 2462.00 | 2.11 | 1.10 | -0.62 | 1315.00 | 3.04  | 0.00  | 0.00   |
| 1.07  | 4504.00 | 5.26 | 2.05 | 1.16  | 2400.00 | 6.42  | 3.38  | 1.50   |
| 2.34  | 3952.00 | 3.24 | 0.03 | 0.02  | 2644.00 | 6.13  | 3.09  | 1.37   |
| -0.44 | 2329.00 | 2.71 | 0.51 | -0.29 | 1790.00 | 3.85  | 0.81  | 0.36   |
| 2.72  | 6521.00 | 7.74 | 4.53 | 2.57  | 4428.00 | 4.27  | 1.23  | 0.55 y |
| 2.15  | 4890.00 | 6.95 | 3.74 | 2.12  | 2294.00 | 7.45  | 4.41  | 1.96 y |
| -1.50 | 2059.00 | 2.33 | 0.88 | -0.50 | 890.00  | 6.29  | 3.25  | 1.45   |
| 2.18  | 783.00  | 6.51 | 3.30 | 1.87  | 485.00  | 5.36  | 2.32  | 1.03   |
| 0.39  | 3126.00 | 4.96 | 1.75 | 0.99  | 1875.00 | 3.68  | 0.64  | 0.29   |
| 1.45  | 2826.00 | 4.74 | 1.53 | 0.87  | 1772.00 | 2.26  | 0.78  | -0.35  |
| 1.70  | 5496.00 | 5.42 | 2.21 | 1.25  | 3631.00 | 16.00 | 12.96 | 5.76   |
| 0.32  | 2675.00 | 4.00 | 0.79 | 0.45  | 1188.00 | 4.12  | 1.08  | 0.48   |
| -0.87 | 3046.00 | 2.20 | 1.01 | -0.57 | 910.00  | 2.09  | 0.95  | -0.42  |
| -0.30 | 425.00  | 4.94 | 1.73 | 0.98  | 180.00  | 10.00 | 6.96  | 3.10   |
| 0.30  | 2813.00 | 3.09 | 0.12 | -0.07 | 1458.00 | 2.61  | 0.43  | -0.19  |
| 15.89 | 524.00  | 9.54 | 6.33 | 3.59  | 235.00  | 11.06 | 8.02  | 3.57 x |
| -0.85 | 2010.00 | 5.47 | 2.26 | 1.28  | 1058.00 | 3.59  | 0.55  | 0.25   |
| -0.80 | 750.00  | 3.73 | 0.52 | 0.30  | 712.00  | 2.95  | 0.09  | -0.04  |
| 0.61  | 3325.00 | 4.93 | 1.72 | 0.98  | 2815.00 | 1.24  | 1.80  | -0.80  |

|         |         |       |         |       |         |       |         |        |
|---------|---------|-------|---------|-------|---------|-------|---------|--------|
| 3.84    | 6864.00 | 11.15 | 7.94    | 4.50  | 4967.00 | 8.15  | 5.11    | 2.28 y |
| 0.20    | 3427.00 | 2.51  | 0.70    | -0.40 | 2349.00 | 1.58  | 1.46    | -0.65  |
| 1.66    | 2748.00 | 1.20  | 2.01    | -1.14 | 2584.00 | 1.47  | 1.57    | -0.70  |
| -0.35   | 2490.00 | 3.49  | 0.28    | 0.16  | 2100.00 | 1.24  | 1.80    | -0.80  |
| 1.40    | 3908.00 | 2.71  | 0.50    | -0.28 | 3660.00 | 4.78  | 1.74    | 0.78   |
| -0.11   | 2776.00 | 1.22  | 1.99    | -1.12 | 1749.00 | 1.20  | 1.84    | -0.82  |
| 0.16    | 2759.00 | 2.10  | 1.11    | -0.63 | 1920.00 | 0.16  | 2.88    | -1.28  |
| -0.03   | 3006.00 | 2.73  | 0.48    | -0.27 | 1497.00 | 0.33  | 2.71    | -1.20  |
| 2.52    | 3017.00 | 2.82  | 0.39    | -0.22 | 2833.00 | 1.45  | 1.59    | -0.71  |
| 2.93    | 2862.00 | 4.68  | 1.47    | 0.84  | 2852.00 | 0.74  | 2.30    | -1.02  |
| -0.40   | 3680.00 | 3.21  | 0.00    | 0.00  | 2640.00 | 0.34  | 2.70    | -1.20  |
| 0.56    | 3517.00 | 4.21  | 1.00    | 0.57  | 1343.00 | 2.31  | 0.73    | -0.32  |
| 3.03    | 4791.00 | 3.53  | 0.32    | 0.18  | 5246.00 | 2.54  | 0.50    | -0.22  |
| 0.80    | 3347.00 | 3.08  | 0.13    | -0.07 | 2347.00 | 0.60  | 2.44    | -1.09  |
| 1.59    | 1713.00 | 8.76  | 5.55    | 3.14  | 2169.00 | 4.56  | 1.52    | 0.68   |
| 0.30    | 2717.00 | 2.94  | 0.27    | -0.15 | 3718.00 | 0.89  | 2.15    | -0.96  |
| 0.50    | 3071.00 | 4.04  | 0.83    | 0.47  | 3938.00 | 1.24  | 1.80    | -0.80  |
| 3.14    | 2612.00 | 2.34  | 0.87    | -0.49 | 1695.00 | 0.35  | 2.69    | -1.19  |
| 0.16    | 2335.00 | 2.91  | 0.30    | -0.17 | 2646.00 | 0.60  | 2.44    | -1.08  |
| 0.74    | 2146.00 | 3.40  | 0.19    | 0.11  | 1115.00 | 3.41  | 0.37    | 0.17   |
| -1.13   | 3412.00 | 3.46  | 0.25    | 0.14  | 1696.00 | 3.24  | 0.20    | 0.09   |
| -0.26   | 4579.00 | 2.18  | 1.03    | -0.58 | 1887.00 | 3.87  | 0.83    | 0.37   |
| -1.06   | 2877.00 | 0.70  | 2.51    | -1.42 | 1716.00 | 2.86  | 0.18    | -0.08  |
| 0.13    | 2394.00 | 0.67  | 2.54    | -1.44 | 766.00  | 6.53  | 3.49    | 1.55   |
| 0.76    | 2265.00 | 2.56  | 0.65    | -0.37 | 1174.00 | 7.24  | 4.20    | 1.87   |
| -0.02   | 4909.00 | 1.32  | 1.89    | -1.07 | 2499.00 | 4.36  | 1.32    | 0.59   |
| -0.46   | 1688.00 | 3.85  | 0.64    | 0.36  | 1781.00 | 5.95  | 2.91    | 1.30   |
| 0.23    | 2893.00 | 1.56  | 1.65    | -0.94 | 1116.00 | 6.90  | 3.86    | 1.72   |
| 0.36    | 1734.00 | 3.23  | 0.02    | 0.01  | 554.00  | 10.29 | 7.25    | 3.22   |
| 0.10    | 1565.00 | 1.15  | 2.06    | -1.17 | 1135.00 | 3.52  | 0.48    | 0.22   |
| 0.42    | 1395.00 | 3.15  | 0.06    | -0.03 | 984.00  | 5.18  | 2.14    | 0.95   |
| -0.41   | 1993.00 | 1.40  | 1.81    | -1.02 | 2812.00 | 2.88  | 0.16    | -0.07  |
| -0.50   | 2458.00 | 1.91  | 1.30    | -0.73 | 1999.00 | 6.25  | 3.21    | 1.43   |
| 0.32    | 3892.00 | 1.03  | 2.18    | -1.24 | 3053.00 | 2.26  | 0.78    | -0.35  |
| -1.00   | 1766.00 | 0.45  | 2.76    | -1.56 | 1888.00 | 2.17  | 0.87    | -0.38  |
| 1.17    | 5488.00 | 3.04  | 0.17    | -0.09 | 5845.00 | 2.87  | 0.17    | -0.07  |
| 1.32    | 928.00  | 1.51  | 1.70    | -0.96 | 1358.00 | 2.21  | 0.83    | -0.37  |
| 1.52    | 3711.00 | 3.85  | 0.64    | 0.37  | 2706.00 | 4.14  | 1.10    | 0.49   |
| 0.17    | 2042.00 | 1.76  | 1.45    | -0.82 | 2108.00 | 1.90  | 1.14    | -0.51  |
|         | 2562.00 | 3.21  | 1.19    |       | 2264.00 | 3.04  | 1.52    |        |
|         |         |       | 3.58    |       |         |       | 4.56    |        |
|         |         |       | 1.76    |       |         |       | 2.25    |        |
| 3931.00 | 22.64   |       |         |       |         |       | 4965.00 | 8.62   |
| 4116.00 | 17.47   |       |         |       |         |       | 4920.00 | 11.24  |
|         |         |       | 3476.00 | 18.44 |         |       |         |        |
| 4530.00 | 26.65   |       | 3215.00 | 18.91 | 3396.00 | 13.22 |         |        |
| 4192.33 | 22.25   |       | 3345.50 | 18.68 |         |       |         |        |

|         |       |         |       |
|---------|-------|---------|-------|
| 306.71  | 4.60  | 184.55  | 0.33  |
| 1331.00 | 3.68  | 1422.00 | 6.05  |
| 2130.00 | 2.35  | 886.00  | 4.18  |
| 1570.00 | 4.01  | 1003.00 | 2.59  |
| 1130.00 | 5.04  | 1227.00 | 5.38  |
| 1610.00 | 3.80  | 1038.67 | 4.05  |
| 501.20  | 1.36  | 173.28  | 1.40  |
|         | 13.80 |         | 1.00  |
|         | 4.08  |         | 4.19  |
|         | 17.88 |         | 5.19  |
|         | 18.45 |         | 14.63 |
|         | 0.97  |         | 0.35  |
|         | 0.03  |         | 0.65  |
| 264.00  | 10.61 | 285.00  | 7.37  |
| 6586.00 | 7.09  | 4953.00 | 3.67  |
| 4409.00 | 3.67  | 5996.00 | 4.77  |
| 2631.00 | 2.32  | 1942.00 | 1.18  |
| 5516.00 | 9.66  | 5047.00 | 4.46  |
| 5914.00 | 8.00  | 5263.00 | 7.45  |





toxic a,b,c



toxic a,b,c

toxic a,b,c

toxic a,b,c  
toxic a,b,c

toxic a,b,c

toxic a,b,c

debris a,b

toxic a,b,c

| Plate    | Well | Gene                   | GeneID           | Cell Count | % inf | Abs Dev |
|----------|------|------------------------|------------------|------------|-------|---------|
| 50053.00 | A02  | M-018891- leucine ric  | 10233.00 LRRC23  | 2388.00    | 3.10  | 1.06    |
| 50053.00 | A04  | M-020054- Down synd    | 10231.00 DSCR1L1 | 1450.00    | 2.41  | 0.37    |
| 50053.00 | A05  | M-006909- zinc finger  | 9658.00 ZNF516   | 2555.00    | 2.19  | 0.15    |
| 50053.00 | A06  | M-017296- coenzyme     | 10229.00 COQ7    | 2688.00    | 6.92  | 4.88    |
| 50053.00 | A07  | M-021095- TSC22 dom    | 9819.00 TSC22D2  | 3350.00    | 1.73  | 0.31    |
| 50053.00 | A08  | M-017164- syntaxin 6   | 10228.00 STX6    | 1340.00    | 2.39  | 0.35    |
| 50053.00 | A09  | M-017673- cullin 7     | 9820.00 CUL7     | 1107.00    | 4.97  | 2.93    |
| 50053.00 | A10  | M-016015- tetracyclin  | 10227.00 TETRAN  | 1180.00    | 2.29  | 0.25    |
| 50053.00 | A11  | M-010936- armadillo r  | 9823.00 ARMCX2   | 2146.00    | 1.21  | 0.83    |
| 50053.00 | A12  | M-020045- CD96 mole    | 10225.00 CD96    | 2120.00    | 4.39  | 2.35    |
| 50053.00 | A13  | M-021122- Rho GTPas    | 9824.00 ARHGAP11 | 764.00     | 8.51  | 6.47    |
| 50053.00 | A14  | M-018335- zinc finger  | 10224.00 ZNF443  | 1298.00    | 3.62  | 1.58    |
| 50053.00 | A15  | M-020065- spermatog    | 9825.00 SPATA2   | 1049.00    | 5.53  | 3.49    |
| 50053.00 | A16  | M-012072- glycoprotei  | 10223.00 GPA33   | 1213.00    | 1.24  | 0.80    |
| 50053.00 | A17  | M-021128- KIAA0258     | 9827.00 KIAA0258 | 864.00     | 4.40  | 2.36    |
| 50053.00 | A18  | M-020003- CTD (carbo   | 10217.00 CTDSPL  | 2857.00    | 6.90  | 4.86    |
| 50053.00 | A19  | M-009885- DnaJ (Hsp4   | 9829.00 DNAJC6   | 403.00     | 10.42 | 8.38    |
| 50053.00 | A20  | M-013112- synovial sa  | 10214.00 SSX3    | 749.00     | 3.47  | 1.43    |
| 50053.00 | A21  | M-021173- janus kinas  | 9832.00 JAKMIP2  | 1238.00    | 4.77  | 2.73    |
| 50053.00 | A23  | M-012968- KIAA0125     | 9834.00 KIAA0125 | 687.00     | 2.91  | 0.87    |
| 50053.00 | B02  | M-017235- guanine nu   | 10681.00 GNB5    | 2018.00    | 2.63  | 0.59    |
| 50053.00 | B04  | M-013717- UDP-GlcNA    | 10678.00 B3GNT2  | 2436.00    | 2.96  | 0.92    |
| 50053.00 | B05  | M-010905- heterogene   | 10236.00 HNRPR   | 4754.00    | 9.53  | 7.49    |
| 50053.00 | B06  | M-012275- advillin     | 10677.00 AVIL    | 5158.00    | 4.98  | 2.94    |
| 50053.00 | B07  | M-007542- solute carri | 10237.00 SLC35B1 | 2726.00    | 1.61  | 0.43    |
| 50053.00 | B08  | M-020164- chondroitir  | 10675.00 CSPG5   | 2322.00    | 1.98  | 0.06    |
| 50053.00 | B09  | M-017162- adaptor-rel  | 10239.00 AP3S2   | 2387.00    | 2.47  | 0.43    |
| 50053.00 | B10  | M-012302- dynactin 6   | 10671.00 DCTN6   | 2640.00    | 1.63  | 0.41    |
| 50053.00 | B11  | M-012111- mitochond    | 10240.00 MRPS31  | 2805.00    | 1.75  | 0.29    |
| 50053.00 | B12  | M-012283- phenylalan   | 10667.00 FARS2   | 2957.00    | 3.58  | 1.54    |
| 50053.00 | B13  | M-009087- potassium    | 10242.00 KCNMB2  | 2182.00    | 2.52  | 0.48    |
| 50053.00 | B14  | M-020167- CD226 mol    | 10666.00 CD226   | 1779.00    | 0.84  | 1.20    |
| 50053.00 | B15  | M-020047- translocase  | 10245.00 TIMM17B | 3472.00    | 2.71  | 0.67    |
| 50053.00 | B16  | M-018889- chromoson    | 10665.00 C6orf10 | 3963.00    | 3.71  | 1.67    |
| 50053.00 | B17  | M-007412- solute carri | 10246.00 SLC17A2 | 2274.00    | 0.84  | 1.20    |
| 50053.00 | B18  | M-012748- KH domain    | 10656.00 KHDRBS3 | 4139.00    | 3.58  | 1.54    |
| 50053.00 | B19  | M-020051- heat-respo   | 10247.00 HRSP12  | 4498.00    | 0.69  | 1.35    |
| 50053.00 | B20  | M-019237- YKT6 v-SNA   | 10652.00 YKT6    | 3306.00    | 1.00  | 1.04    |
| 50053.00 | B21  | M-010274- glycine-N-a  | 10249.00 GLYAT   | 1995.00    | 1.05  | 0.99    |
| 50053.00 | B23  | M-020041- serine/argi  | 10250.00 SRRM1   | 1941.00    | 1.60  | 0.44    |
| 50053.00 | C02  | M-004920- DEAD (Asp-   | 10212.00 DDX39   | 3877.00    | 4.72  | 2.68    |
| 50053.00 | C04  | M-010636- flotillin 1  | 10211.00 FLOT1   | 2673.00    | 4.30  | 2.26    |
| 50053.00 | C05  | M-008815- leucine car  | 9836.00 LCMT2    | 3324.00    | 3.76  | 1.72    |
| 50053.00 | C06  | M-015804- eukaryotic   | 10209.00 EIF1    | 4784.00    | 4.62  | 2.58    |
| 50053.00 | C07  | M-014001- GINS comp    | 9837.00 GINS1    | 4886.00    | 5.87  | 3.83    |
| 50053.00 | C08  | M-012112- InaD-like (C | 10207.00 INADL   | 4014.00    | 8.74  | 6.70    |

|              |                        |                   |         |      |      |
|--------------|------------------------|-------------------|---------|------|------|
| 50053.00 C09 | M-021265- KIAA0748     | 9840.00 KIAA0748  | 3397.00 | 3.18 | 1.14 |
| 50053.00 C10 | M-017371- epithelial V | 10205.00 EVA1     | 2962.00 | 1.86 | 0.18 |
| 50053.00 C11 | M-006915- zinc finger  | 9841.00 ZBTB24    | 3421.00 | 3.57 | 1.53 |
| 50053.00 C12 | M-012132- nuclear tra  | 10204.00 NUTF2    | 1354.00 | 4.14 | 2.10 |
| 50053.00 C13 | M-023203- pleckstrin f | 9842.00 PLEKHM1   | 3436.00 | 5.21 | 3.17 |
| 50053.00 C14 | M-009581- dehydroge    | 10202.00 DHRS2    | 2127.00 | 5.74 | 3.70 |
| 50053.00 C15 | M-009498- hephaestin   | 9843.00 HEPH      | 2812.00 | 2.56 | 0.52 |
| 50053.00 C16 | M-012128- M-phase pl   | 10199.00 MPHOSPH1 | 2830.00 | 2.33 | 0.29 |
| 50053.00 C17 | M-014180- KIAA0528     | 9847.00 KIAA0528  | 3587.00 | 2.90 | 0.86 |
| 50053.00 C18 | M-012133- proteasom    | 10197.00 PSME3    | 3527.00 | 1.76 | 0.28 |
| 50053.00 C19 | M-007729- microfibrill | 9848.00 MFAP3L    | 3899.00 | 1.44 | 0.60 |
| 50053.00 C20 | M-026786- protein arg  | 10196.00 PRMT3    | 3498.00 | 2.74 | 0.70 |
| 50053.00 C21 | M-021263- KIAA0753     | 9851.00 KIAA0753  | 2184.00 | 5.59 | 3.55 |
| 50053.00 C23 | M-018914- EPM2A (laf   | 9852.00 EPM2AIP1  | 1985.00 | 8.16 | 6.12 |
| 50053.00 D02 | M-020087- metaxin 2    | 10651.00 MTX2     | 2928.00 | 2.53 | 0.49 |
| 50053.00 D04 | M-020157- slowmo ho    | 10650.00 SLMO1    | 3382.00 | 6.68 | 4.64 |
| 50053.00 D05 | M-012103- HLA compl    | 10255.00 HCG9     | 3446.00 | 2.41 | 0.37 |
| 50053.00 D06 | M-012291- secretoglo   | 10647.00 SCGB1D2  | 3196.00 | 2.00 | 0.04 |
| 50053.00 D07 | M-019994- immunogl     | 10261.00 IGSF6    | 3805.00 | 3.94 | 1.90 |
| 50053.00 D08 | M-019483- fibrinogen   | 10646.00 FSBP     | 2154.00 | 2.41 | 0.37 |
| 50053.00 D09 | M-017190- splicing fac | 10262.00 SF3B4    | 955.00  | 5.97 | 3.93 |
| 50053.00 D10 | M-013114- left-right d | 10637.00 LEFTY1   | 4819.00 | 2.28 | 0.24 |
| 50053.00 D11 | M-010638- stromal an   | 10274.00 STAG1    | 3133.00 | 2.11 | 0.07 |
| 50053.00 D12 | M-017969- ATP syntha   | 10632.00 ATP5L    | 3339.00 | 7.01 | 4.97 |
| 50053.00 D13 | M-012089- Down synd    | 10281.00 DSCR4    | 2271.00 | 3.26 | 1.22 |
| 50053.00 D14 | M-017560- podoplanir   | 10630.00 PDPN     | 2366.00 | 4.40 | 2.36 |
| 50053.00 D15 | M-012085- BET1 homc    | 10282.00 BET1     | 1858.00 | 3.28 | 1.24 |
| 50053.00 D16 | M-010814- thioredoxir  | 10628.00 TXNIP    | 3130.00 | 2.56 | 0.52 |
| 50053.00 D17 | M-020024- serological  | 10283.00 SDCCAG10 | 2663.00 | 3.57 | 1.53 |
| 50053.00 D18 | M-021498- myosin reg   | 10627.00 MRCL3    | 2013.00 | 6.56 | 4.52 |
| 50053.00 D19 | M-016257- survival mc  | 10285.00 SMNDC1   | 3127.00 | 3.49 | 1.45 |
| 50053.00 D20 | M-012220- tripartite r | 10626.00 TRIM16   | 4241.00 | 7.19 | 5.15 |
| 50053.00 D21 | M-019996- eukaryotic   | 10289.00 EIF1B    | 4374.00 | 7.54 | 5.50 |
| 50053.00 D23 | M-012095- macrophag    | 10296.00 MAEA     | 3870.00 | 1.27 | 0.77 |
| 50053.00 E02 | M-012131- teashirt far | 10194.00 TSHZ1    | 2866.00 | 1.81 | 0.23 |
| 50053.00 E04 | M-006922- ring finger  | 10193.00 RNF41    | 1088.00 | 2.67 | 0.63 |
| 50053.00 E05 | M-026133- RUN and S    | 9853.00 RUSC2     | 1425.00 | 1.12 | 0.92 |
| 50053.00 E06 | M-012079- thioredoxir  | 10190.00 TXNDC9   | 1933.00 | 1.60 | 0.44 |
| 50053.00 E07 | M-018353- transmemt    | 9854.00 TMEM24    | 2915.00 | 0.55 | 1.49 |
| 50053.00 E08 | M-012078- THO compl    | 10189.00 THOC4    | 4461.00 | 1.68 | 0.36 |
| 50053.00 E09 | M-015290- centrosom    | 9857.00 CEP350    | 2925.00 | 2.02 | 0.02 |
| 50053.00 E10 | M-017936- RNA bindin   | 10179.00 RBM7     | 2920.00 | 1.34 | 0.70 |
| 50053.00 E11 | M-021259- KIAA0649     | 9858.00 KIAA0649  | 1827.00 | 3.01 | 0.97 |
| 50053.00 E12 | M-020639- odz, odd O   | 10178.00 ODZ1     | 3754.00 | 1.17 | 0.87 |
| 50053.00 E13 | M-021251- leucine-ric  | 9860.00 LRIG2     | 1777.00 | 1.35 | 0.69 |
| 50053.00 E14 | M-019989- cornichon l  | 10175.00 CNIH     | 2262.00 | 2.34 | 0.30 |
| 50053.00 E15 | M-021249- proteasom    | 9861.00 PSMD6     | 224.00  | 5.36 | 3.32 |



|          |     |                        |          |          |         |      |      |
|----------|-----|------------------------|----------|----------|---------|------|------|
| 50053.00 | E16 | M-021347- zinc finger  | 10172.00 | ZNF256   | 2695.00 | 1.15 | 0.89 |
| 50053.00 | E17 | M-021245- KIAA0644 g   | 9865.00  | KIAA0644 | 2664.00 | 0.86 | 1.18 |
| 50053.00 | E18 | M-016313- RNA termir   | 10171.00 | RCL1     | 3593.00 | 1.53 | 0.51 |
| 50053.00 | E19 | M-026772- tripartite r | 9866.00  | TRIM66   | 1732.00 | 0.52 | 1.52 |
| 50053.00 | E20 | M-009400- dehydroge    | 10170.00 | DHRS9    | 2620.00 | 1.07 | 0.97 |
| 50053.00 | E21 | M-006916- praja 2, RIM | 9867.00  | PJA2     | 3190.00 | 2.16 | 0.12 |
| 50053.00 | E23 | M-021243- translocase  | 9868.00  | TOMM70A  | 3410.00 | 1.96 | 0.08 |
| 50053.00 | F02 | M-019448- polymerase   | 10623.00 | POLR3C   | 4680.00 | 2.59 | 0.55 |
| 50053.00 | F04 | M-020140- polymerase   | 10622.00 | POLR3G   | 1501.00 | 1.27 | 0.77 |
| 50053.00 | F05 | M-006925- membrane     | 10299.00 | MARCH6   | 4075.00 | 1.06 | 0.98 |
| 50053.00 | F06 | M-019240- polymerase   | 10621.00 | POLR3F   | 2753.00 | 2.14 | 0.10 |
| 50053.00 | F07 | M-012115- katanin p8l  | 10300.00 | KATNB1   | 3073.00 | 1.95 | 0.09 |
| 50053.00 | F08 | M-008511- trans-golgi  | 10618.00 | TGOLN2   | 632.00  | 3.48 | 1.44 |
| 50053.00 | F09 | M-020009- deleted in l | 10301.00 | DLEU1    | 3304.00 | 2.06 | 0.02 |
| 50053.00 | F10 | M-012202- STAM bind    | 10617.00 | STAMPB   | 3587.00 | 1.37 | 0.67 |
| 50053.00 | F11 | M-020094- small nucle  | 10302.00 | SNAPC5   | 1374.00 | 1.24 | 0.80 |
| 50053.00 | F12 | M-006839- sperm asso   | 10615.00 | SPAG5    | 3057.00 | 1.67 | 0.37 |
| 50053.00 | F13 | M-015637- zinc finger  | 10308.00 | ZNF267   | 2707.00 | 0.89 | 1.15 |
| 50053.00 | F14 | M-012225- hexamethy    | 10614.00 | HEXIM1   | 1731.00 | 1.16 | 0.88 |
| 50053.00 | F15 | M-012163- Down synd    | 10311.00 | DSCR3    | 2008.00 | 1.64 | 0.40 |
| 50053.00 | F16 | M-015639- ER lipid raf | 10613.00 | ERLIN1   | 2512.00 | 0.80 | 1.24 |
| 50053.00 | F17 | M-020088- reticulon 3  | 10313.00 | RTN3     | 1849.00 | 2.22 | 0.18 |
| 50053.00 | F18 | M-006931- tripartite r | 10612.00 | TRIM3    | 2790.00 | 1.54 | 0.50 |
| 50053.00 | F19 | M-012159- UDP-Gal:be   | 10317.00 | B3GALT5  | 3050.00 | 3.54 | 1.50 |
| 50053.00 | F20 | M-020149- ST6 (alpha-  | 10610.00 | ST6GALNA | 1924.00 | 1.30 | 0.74 |
| 50053.00 | F21 | M-020092- cysteine-ric | 10321.00 | CRISP3   | 2250.00 | 2.09 | 0.05 |
| 50053.00 | F23 | M-020089- kelch repea  | 10324.00 | KBTBD10  | 3237.00 | 3.49 | 1.45 |
| 50053.00 | G02 | M-016317- small EDRK   | 10169.00 | SERF2    | 1550.00 | 2.26 | 0.22 |
| 50053.00 | G04 | M-004860- carbohydra   | 10164.00 | CHST4    | 1730.00 | 3.87 | 1.83 |
| 50053.00 | G05 | M-007184- KIAA0317     | 9870.00  | KIAA0317 | 1833.00 | 2.13 | 0.09 |
| 50053.00 | G06 | M-010273- membrane     | 10162.00 | MBOAT5   | 3658.00 | 4.62 | 2.58 |
| 50053.00 | G07 | M-008493- SEC24 relat  | 9871.00  | SEC24D   | 3445.00 | 1.57 | 0.47 |
| 50053.00 | G08 | M-013647- ATPase, H+   | 10159.00 | ATP6AP2  | 2125.00 | 6.35 | 4.31 |
| 50053.00 | G09 | M-021240- FCH and dc   | 9873.00  | FCHSD2   | 1449.00 | 1.52 | 0.52 |
| 50053.00 | G10 | M-010635- PDZK1 inte   | 10158.00 | PDZK1IP1 | 2029.00 | 2.32 | 0.28 |
| 50053.00 | G11 | M-021236- TOX high r   | 9878.00  | TOX4     | 1714.00 | 1.40 | 0.64 |
| 50053.00 | G12 | M-032198- muscleblin   | 10150.00 | MBNL2    | 4020.00 | 1.87 | 0.17 |
| 50053.00 | G13 | M-021234- DEAD (Asp-   | 9879.00  | DDX46    | 1763.00 | 2.38 | 0.34 |
| 50053.00 | G14 | M-032208- splicing fac | 10147.00 | SFRS14   | 2005.00 | 8.23 | 6.19 |
| 50053.00 | G15 | M-021232- zinc finger  | 9880.00  | ZBTB39   | 1771.00 | 1.02 | 1.02 |
| 50053.00 | G16 | M-020516- family with  | 10144.00 | FAM13A1  | 3016.00 | 1.82 | 0.22 |
| 50053.00 | G17 | M-023465- lupus brain  | 9881.00  | LBA1     | 3836.00 | 1.25 | 0.79 |
| 50053.00 | G18 | M-019986- C-type lecti | 10143.00 | CLEC3A   | 3299.00 | 1.76 | 0.28 |
| 50053.00 | G19 | M-021230- TBC1 doma    | 9882.00  | TBC1D4   | 2671.00 | 1.98 | 0.06 |
| 50053.00 | G20 | M-012073- chromoson    | 10141.00 | C4orf6   | 3914.00 | 4.04 | 2.00 |
| 50053.00 | G21 | M-017575- POM121 m     | 9883.00  | POM121   | 1471.00 | 0.68 | 1.36 |
| 50053.00 | G23 | M-021228- leucine ric  | 9884.00  | LRRC37A  | 3910.00 | 0.84 | 1.20 |

|              |                         |                  |         |      |      |
|--------------|-------------------------|------------------|---------|------|------|
| 50053.00 H02 | M-020141- synaptoner    | 10609.00 SC65    | 3333.00 | 0.36 | 1.68 |
| 50053.00 H04 | M-019182- poly(A) bin   | 10605.00 PAIP1   | 4123.00 | 0.39 | 1.65 |
| 50053.00 H05 | M-012189- Ras-relatec   | 10325.00 RRAGB   | 2487.00 | 0.08 | 1.96 |
| 50053.00 H06 | M-007440- solute carri  | 10599.00 SLCO1B1 | 3564.00 | 0.84 | 1.20 |
| 50053.00 H07 | M-006926- polycomb ξ    | 10336.00 PCGF3   | 1916.00 | 0.00 | 2.04 |
| 50053.00 H08 | M-006836- structural r  | 10592.00 SMC2    | 1134.00 | 1.68 | 0.36 |
| 50053.00 H09 | M-020098- triadin       | 10345.00 TRDN    | 2316.00 | 0.09 | 1.95 |
| 50053.00 H10 | M-013631- secretagog    | 10590.00 SCGN    | 2144.00 | 4.01 | 1.97 |
| 50053.00 H11 | M-009892- tryptophan    | 10352.00 WARS2   | 3266.00 | 0.28 | 1.76 |
| 50053.00 H12 | M-008242- 5,10-methc    | 10588.00 MTHFS   | 2151.00 | 1.02 | 1.02 |
| 50053.00 H13 | M-012347- nucleopho:    | 10360.00 NPM3    | 1988.00 | 0.15 | 1.89 |
| 50053.00 H14 | M-012216- collectin su  | 10584.00 COLEC10 | 3512.00 | 0.46 | 1.58 |
| 50053.00 H15 | M-019230- nucleopho:    | 10361.00 NPM2    | 2777.00 | 0.90 | 1.14 |
| 50053.00 H16 | M-019804- SMA3          | 10571.00 SMA3    | 1256.00 | 0.24 | 1.80 |
| 50053.00 H17 | M-012720- calcium bir   | 10367.00 CBARA1  | 2178.00 | 0.37 | 1.67 |
| 50053.00 H18 | M-008504- dihydropyr    | 10570.00 DPYSL4  | 4488.00 | 0.29 | 1.75 |
| 50053.00 H19 | M-017452- calcium cha   | 10368.00 CACNG3  | 3449.00 | 0.41 | 1.63 |
| 50053.00 H20 | M-017191- SLU7 splici   | 10569.00 SLU7    | 1387.00 | 0.36 | 1.68 |
| 50053.00 H21 | M-012160- calcium cha   | 10369.00 CACNG2  | 4377.00 | 0.82 | 1.22 |
| 50053.00 H23 | M-021359- butyrophili   | 10384.00 BTN3A3  | 2873.00 | 0.07 | 1.97 |
| 50053.00 I02 | M-010094- RNA bindin    | 10137.00 RBM12   | 2275.00 | 0.84 | 1.20 |
| 50053.00 I04 | M-005863- elastase 3A   | 10136.00 ELA3A   | 2053.00 | 0.73 | 1.31 |
| 50053.00 I05 | M-010361- oxysterol b   | 9885.00 OSBPL2   | 2699.00 | 4.11 | 2.07 |
| 50053.00 I06 | M-018679- B-cell receç  | 10134.00 BCAP31  | 1596.00 | 1.94 | 0.10 |
| 50053.00 I07 | M-021305- Smg-7 hor     | 9887.00 SMG7     | 1705.00 | 1.88 | 0.16 |
| 50053.00 I08 | M-018336- zinc finger   | 10127.00 ZNF263  | 2125.00 | 2.21 | 0.17 |
| 50053.00 I09 | M-021226- zinc finger,  | 9889.00 ZBED4    | 955.00  | 2.51 | 0.47 |
| 50053.00 I10 | M-019993- dynein, axc   | 10126.00 DNAL4   | 2032.00 | 2.07 | 0.03 |
| 50053.00 I11 | M-009911- plasticity re | 9890.00 LPPR4    | 1847.00 | 1.35 | 0.69 |
| 50053.00 I12 | M-012398- ADP-ribosy    | 10123.00 ARL4C   | 1765.00 | 4.02 | 1.98 |
| 50053.00 I13 | M-021207- TEL2, telon   | 9894.00 TELO2    | 2122.00 | 1.79 | 0.25 |
| 50053.00 I14 | M-006920- tripartite r  | 10107.00 TRIM10  | 2238.00 | 1.16 | 0.88 |
| 50053.00 I15 | M-014181- KIAA0329      | 9895.00 KIAA0329 | 1315.00 | 2.43 | 0.39 |
| 50053.00 I16 | M-015413- CTD (carbo    | 10106.00 CTDSP2  | 2288.00 | 1.70 | 0.34 |
| 50053.00 I17 | M-021222- KIAA0196      | 9897.00 KIAA0196 | 2582.00 | 2.25 | 0.21 |
| 50053.00 I18 | M-009708- peptidylprc   | 10105.00 PPIF    | 2622.00 | 0.72 | 1.32 |
| 50053.00 I19 | M-021220- ubiquitin a:  | 9898.00 UBAP2L   | 2935.00 | 4.05 | 2.01 |
| 50053.00 I20 | M-003719- tetraspanir   | 10103.00 TSPAN1  | 3752.00 | 2.00 | 0.04 |
| 50053.00 I21 | M-007632- synaptic ve   | 9899.00 SV2B     | 1571.00 | 0.45 | 1.59 |
| 50053.00 I23 | M-007631- synaptic ve   | 9900.00 SV2A     | 2478.00 | 2.10 | 0.06 |
| 50053.00 J02 | M-007535- solute carri  | 10568.00 SLC34A2 | 1137.00 | 5.80 | 3.76 |
| 50053.00 J04 | M-012224- olfactomec    | 10562.00 OLFM4   | 1995.00 | 1.25 | 0.79 |
| 50053.00 J05 | M-010071- butyrophili   | 10385.00 BTN2A2  | 3348.00 | 2.36 | 0.32 |
| 50053.00 J06 | M-007537- solute carri  | 10559.00 SLC35A1 | 4217.00 | 3.41 | 1.37 |
| 50053.00 J07 | M-020632- synaptoner    | 10388.00 SYCP2   | 4004.00 | 6.24 | 4.20 |
| 50053.00 J08 | M-019447- ribonuclea:   | 10557.00 RPP38   | 2598.00 | 2.54 | 0.50 |
| 50053.00 J09 | M-010350- choline/etf   | 10390.00 CEPT1   | 1817.00 | 2.70 | 0.66 |

|              |                        |                    |         |      |      |
|--------------|------------------------|--------------------|---------|------|------|
| 50053.00 J10 | M-015336- ribonuclea   | 10556.00 RPP30     | 2014.00 | 1.09 | 0.95 |
| 50053.00 J11 | M-010392- phosphatid   | 10400.00 PEMT      | 2575.00 | 1.20 | 0.84 |
| 50053.00 J12 | M-012229- ADP-ribosy   | 10550.00 ARL6IP5   | 2464.00 | 1.58 | 0.46 |
| 50053.00 J13 | M-018009- ST3 beta-g   | 10402.00 ST3GAL6   | 1679.00 | 3.93 | 1.89 |
| 50053.00 J14 | M-016357- transmemk    | 10548.00 TM9SF1    | 2655.00 | 4.33 | 2.29 |
| 50053.00 J15 | M-005993- plasma glui  | 10404.00 PGCP      | 1537.00 | 2.60 | 0.56 |
| 50053.00 J16 | M-012269- hepatitis B  | 10542.00 HBXIP     | 2113.00 | 4.12 | 2.08 |
| 50053.00 J17 | M-010564- WAP four-c   | 10406.00 WFDC2     | 2864.00 | 3.49 | 1.45 |
| 50053.00 J18 | M-020148- acidic (leuc | 10541.00 ANP32B    | 3082.00 | 1.95 | 0.09 |
| 50053.00 J19 | M-017043- TGF beta-ir  | 10412.00 TINP1     | 1989.00 | 6.03 | 3.99 |
| 50053.00 J20 | M-019954- thioredoxir  | 10539.00 TXNL2     | 3985.00 | 1.88 | 0.16 |
| 50053.00 J21 | M-020086- acid-induci  | 10414.00 OA48-18   | 1167.00 | 0.86 | 1.18 |
| 50053.00 J23 | M-020027- spondin 2,   | 10417.00 SPON2     | 3766.00 | 0.96 | 1.08 |
| 50053.00 K02 | M-016336- Ts translati | 10102.00 TSFM      | 2698.00 | 0.30 | 1.74 |
| 50053.00 K04 | M-017266- tetraspanir  | 10100.00 TSPAN2    | 2325.00 | 1.38 | 0.66 |
| 50053.00 K05 | M-014175- SLIT-ROBO    | 9901.00 SRGAP3     | 2997.00 | 0.93 | 1.11 |
| 50053.00 K06 | M-010735- tetraspanir  | 10099.00 TSPAN3    | 3992.00 | 0.60 | 1.44 |
| 50053.00 K07 | M-021216- kelch-like 2 | 9903.00 KLHL21     | 3888.00 | 1.70 | 0.34 |
| 50053.00 K08 | M-010634- tetraspanir  | 10098.00 TSPAN5    | 1844.00 | 1.74 | 0.30 |
| 50053.00 K09 | M-021123- RNA bindin   | 9904.00 RBM19      | 1986.00 | 0.70 | 1.34 |
| 50053.00 K10 | M-020052- uronyl-2-su  | 10090.00 UST       | 917.00  | 1.09 | 0.95 |
| 50053.00 K11 | M-022997- RUN and TI   | 9905.00 RUTBC1     | 3596.00 | 2.22 | 0.18 |
| 50053.00 K12 | M-006266- potassium    | 10089.00 KCNK7     | 4274.00 | 2.64 | 0.60 |
| 50053.00 K13 | M-007548- solute carri | 9906.00 SLC35E2    | 3064.00 | 2.28 | 0.24 |
| 50053.00 K14 | M-012716- polyglutam   | 10084.00 PQBP1     | 3211.00 | 1.74 | 0.30 |
| 50053.00 K15 | M-025284- KIAA0415 p   | 9907.00 tcag7.1310 | 2520.00 | 0.44 | 1.60 |
| 50053.00 K16 | M-012102- glypican 6   | 10082.00 GPC6      | 2441.00 | 0.25 | 1.79 |
| 50053.00 K17 | M-015329- GTPase act   | 9908.00 G3BP2      | 3533.00 | 0.54 | 1.50 |
| 50053.00 K18 | M-012096- programme    | 10081.00 PDCD7     | 1872.00 | 0.32 | 1.72 |
| 50053.00 K19 | M-006917- DENN/MAL     | 9909.00 DENND4B    | 4672.00 | 3.23 | 1.19 |
| 50053.00 K20 | M-013856- chromoson    | 10069.00 C21orf6   | 3792.00 | 0.34 | 1.70 |
| 50053.00 K21 | M-014176- transmemk    | 9911.00 TMCC2      | 3552.00 | 1.41 | 0.63 |
| 50053.00 K23 | M-009238- KIAA0672 g   | 9912.00 KIAA0672   | 3581.00 | 1.42 | 0.62 |
| 50053.00 L02 | M-018228- leprecan-lil | 10536.00 LEPREL2   | 2683.00 | 2.09 | 0.05 |
| 50053.00 L04 | M-003535- ribonuclea   | 10535.00 RNASEH2A  | 2757.00 | 0.98 | 1.06 |
| 50053.00 L05 | M-012730- spondin 1,   | 10418.00 SPON1     | 2493.00 | 1.12 | 0.92 |
| 50053.00 L06 | M-020114- nebullette   | 10529.00 NEBL      | 4280.00 | 2.06 | 0.02 |
| 50053.00 L07 | M-020776- UBA domai    | 10422.00 UBAC1     | 1640.00 | 0.18 | 1.86 |
| 50053.00 L08 | M-019143- nucleolar p  | 10528.00 NOL5A     | 2444.00 | 0.61 | 1.43 |
| 50053.00 L09 | M-009631- CDP-diacylg  | 10423.00 CDIPT     | 3180.00 | 3.30 | 1.26 |
| 50053.00 L10 | M-012256- importin 8   | 10526.00 IPO8      | 4202.00 | 1.24 | 0.80 |
| 50053.00 L11 | M-020104- ariadne ho   | 10425.00 ARIH2     | 2340.00 | 2.82 | 0.78 |
| 50053.00 L12 | M-016176- calcium ho   | 10523.00 CHERP     | 1719.00 | 1.16 | 0.88 |
| 50053.00 L13 | M-008299- SEC24 relat  | 10427.00 SEC24B    | 2854.00 | 1.19 | 0.85 |
| 50053.00 L14 | M-020808- deformed e   | 10522.00 DEAF1     | 2456.00 | 0.65 | 1.39 |
| 50053.00 L15 | M-020105- craniofacia  | 10428.00 CFDP1     | 2322.00 | 0.13 | 1.91 |
| 50053.00 L16 | M-013450- DEAD (Asp-   | 10521.00 DDX17     | 1889.00 | 0.32 | 1.72 |

|                     |                            |                        |                |             |             |
|---------------------|----------------------------|------------------------|----------------|-------------|-------------|
| 50053.00 L17        | M-010704- transmembr       | 10430.00 TMEM147       | 1246.00        | 0.48        | 1.56        |
| 50053.00 L18        | M-020153- zinc finger      | 10520.00 ZNF211        | 2652.00        | 0.68        | 1.36        |
| 50053.00 L19        | M-020150- translocase      | 10431.00 TIMM23        | 2844.00        | 1.83        | 0.21        |
| 50053.00 L20        | M-014733- F-box and \      | 10517.00 FBXW10        | 1762.00        | 0.68        | 1.36        |
| 50053.00 L21        | M-020144- RNA bindin       | 10432.00 RBM14         | 3259.00        | 0.46        | 1.58        |
| 50053.00 L23        | M-012215- CDC42 effe       | 10435.00 CDC42EP2      | 3408.00        | 0.21        | 1.83        |
| 50053.00 M02        | M-015414- phenylalan       | 10056.00 FARSB         | 1441.00        | 0.35        | 1.69        |
| 50053.00 M04        | M-006402- SUMO1 act        | 10055.00 SAE1          | 2115.00        | 2.74        | 0.70        |
| 50053.00 M05        | M-021210- suppressor       | 9913.00 SUPT7L         | 3177.00        | 0.41        | 1.63        |
| 50053.00 M06        | M-005248- SUMO1 act        | 10054.00 SAE2          | 2101.00        | 0.71        | 1.33        |
| 50053.00 M07        | M-021203- family with      | 9917.00 FAM20B         | 2765.00        | 3.11        | 1.07        |
| 50053.00 M08        | M-012056- adaptor-rel      | 10053.00 AP1M2         | 2375.00        | 2.48        | 0.44        |
| 50053.00 M09        | M-021198- non-SMC c        | 9918.00 NCAPD2         | 1689.00        | 1.60        | 0.44        |
| 50053.00 M10        | M-007414- solute carri     | 10050.00 SLC17A4       | 1842.00        | 2.55        | 0.51        |
| 50053.00 M11        | M-026032- KIAA0310         | 9919.00 KIAA0310       | 2338.00        | 1.92        | 0.12        |
| 50053.00 M12        | M-013020- DnaJ (Hsp4       | 10049.00 DNAJB6        | 2735.00        | 0.99        | 1.05        |
| 50053.00 M13        | M-006918- ring finger      | 9921.00 RNF10          | 1991.00        | 1.21        | 0.83        |
| 50053.00 M14        | M-012026- cystatin 8 (     | 10047.00 CST8          | 2527.00        | 1.19        | 0.85        |
| 50053.00 M15        | M-006458- IQ motif an      | 9922.00 IQSEC1         | 1008.00        | 1.88        | 0.16        |
| 50053.00 M16        | M-019942- chromosom        | 10046.00 CXorf6        | 2346.00        | 0.34        | 1.70        |
| 50053.00 M17        | M-006919- zinc finger      | 9923.00 ZBTB40         | 1126.00        | 0.44        | 1.60        |
| 50053.00 M18        | M-005996- phosphatid       | 10026.00 PIGK          | 1294.00        | 0.85        | 1.19        |
| 50053.00 M19        | M-021190- zinc finger      | 9925.00 ZBTB5          | 2922.00        | 0.55        | 1.49        |
| 50053.00 M20        | M-019961- SH2B adap        | 10019.00 SH2B3         | 2667.00        | 1.69        | 0.35        |
| 50053.00 M21        | M-021185- lysophosph       | 9926.00 LPGAT1         | 3915.00        | 0.66        | 1.38        |
| 50053.00 M23        | M-012961- mitofusin 2      | 9927.00 MFN2           | 2936.00        | 0.92        | 1.12        |
| 50053.00 N02        | M-007289- sema doma        | 10509.00 SEMA4B        | 1442.00        | 3.95        | 1.91        |
| <b>50053.00 N04</b> | <b>M-003708- sema doma</b> | <b>10505.00 SEMA4F</b> | <b>3005.00</b> | <b>7.22</b> | <b>5.18</b> |
| 50053.00 N05        | M-019090- EMG1 nucl        | 10436.00 EMG1          | 1861.00        | 3.22        | 1.18        |
| 50053.00 N06        | M-013453- sema doma        | 10500.00 SEMA6C        | 2700.00        | 0.96        | 1.08        |
| 50053.00 N07        | M-017397- nuclear DN       | 10438.00 C1D           | 1948.00        | 1.23        | 0.81        |
| 50053.00 N08        | M-004130- coactivator      | 10498.00 CARM1         | 2355.00        | 3.35        | 1.31        |
| 50053.00 N09        | M-012203- olfactomec       | 10439.00 OLFM1         | 1914.00        | 2.19        | 0.15        |
| 50053.00 N10        | M-012205- ecto-NOX c       | 10495.00 ENOX2         | 1576.00        | 1.71        | 0.33        |
| 50053.00 N11        | M-012739- translocase      | 10440.00 TIMM17A       | 1430.00        | 4.34        | 2.30        |
| 50053.00 N12        | M-009726- vesicle ami      | 10493.00 VAT1          | 808.00         | 2.85        | 0.81        |
| 50053.00 N13        | M-014177- phosphonc        | 10443.00 PFAAP5        | 2549.00        | 1.61        | 0.43        |
| 50053.00 N14        | M-003648- cartilage as     | 10491.00 CRTAP         | 2856.00        | 3.89        | 1.85        |
| 50053.00 N15        | M-019424- zer-1 homc       | 10444.00 ZER1          | 2751.00        | 2.76        | 0.72        |
| 50053.00 N16        | M-020152- vesicle trar     | 10490.00 VT11B         | 2388.00        | 2.64        | 0.60        |
| 50053.00 N17        | M-018557- microspher       | 10445.00 MCRS1         | 1336.00        | 3.37        | 1.33        |
| 50053.00 N18        | M-031268- leucine rich     | 10489.00 LRRC41        | 1926.00        | 2.54        | 0.50        |
| 50053.00 N19        | M-010565- leucine rich     | 10446.00 LRRN2         | 1879.00        | 1.70        | 0.34        |
| 50053.00 N20        | M-012211- CAP, adeny       | 10486.00 CAP2          | 2521.00        | 3.05        | 1.01        |
| 50053.00 N21        | M-020514- family with      | 10447.00 FAM3C         | 1732.00        | 4.33        | 2.29        |
| 50053.00 N23        | M-009466- peptidylprc      | 10450.00 PPIE          | 997.00         | 2.91        | 0.87        |
| 50053.00 O02        | M-009600- acyl-CoA th      | 10005.00 ACOT8         | 2730.00        | 2.16        | 0.12        |

|              |                        |          |          |         |       |       |
|--------------|------------------------|----------|----------|---------|-------|-------|
| 50053.00 O04 | M-005975- N-acetylate  | 10004.00 | NAALADL1 | 3193.00 | 1.16  | 0.88  |
| 50053.00 O05 | M-017674- Josephin de  | 9929.00  | JOSD1    | 3049.00 | 2.23  | 0.19  |
| 50053.00 O06 | M-005974- N-acetylate  | 10003.00 | NAALAD2  | 2444.00 | 2.99  | 0.95  |
| 50053.00 O07 | M-021180- helicase wi  | 9931.00  | HELZ     | 3163.00 | 2.34  | 0.30  |
| 50053.00 O08 | M-008595- potassium    | 9992.00  | KCNE2    | 1848.00 | 3.46  | 1.42  |
| 50053.00 O09 | M-032027- KIAA0020     | 9933.00  | KIAA0020 | 3533.00 | 3.88  | 1.84  |
| 50053.00 O10 | M-019452- ROD1 regu    | 9991.00  | ROD1     | 3504.00 | 1.31  | 0.73  |
| 50053.00 O11 | M-021175- Rho GTPasi   | 9938.00  | ARHGAP25 | 3418.00 | 3.16  | 1.12  |
| 50053.00 O12 | M-012070- heterogene   | 9987.00  | HNRPDL   | 3697.00 | 2.41  | 0.37  |
| 50053.00 O13 | M-003531- RNA bindin   | 9939.00  | RBM8A    | 505.00  | 8.32  | 6.28  |
| 50053.00 O14 | M-007461- solute carri | 9963.00  | SLC23A1  | 2761.00 | 1.27  | 0.77  |
| 50053.00 O15 | M-008572- endonuclea   | 9941.00  | ENDOGL1  | 2308.00 | 1.91  | 0.13  |
| 50053.00 O16 | M-007462- solute carri | 9962.00  | SLC23A2  | 2760.00 | 0.14  | 1.90  |
| 50053.00 O17 | M-022514- heparan su   | 9951.00  | HS3ST4   | 2782.00 | 1.73  | 0.31  |
| 50053.00 O18 | M-004984- major vault  | 9961.00  | MVP      | 1459.00 | 2.40  | 0.36  |
| 50053.00 O19 | M-010083- heparan su   | 9953.00  | HS3ST3B1 | 3149.00 | 2.45  | 0.41  |
| 50053.00 O20 | M-009217- heparan su   | 9957.00  | HS3ST1   | 3711.00 | 1.62  | 0.42  |
| 50053.00 O21 | M-008530- heparan su   | 9955.00  | HS3ST3A1 | 1958.00 | 1.99  | 0.05  |
| 50053.00 O23 | M-010031- heparan su   | 9956.00  | HS3ST2   | 1956.00 | 1.07  | 0.97  |
| 50053.00 P02 | M-009582- Sec23 hom    | 10484.00 | SEC23A   | 1152.00 | 4.51  | 2.47  |
| 50053.00 P04 | M-009592- Sec23 hom    | 10483.00 | SEC23B   | 543.00  | 7.37  | 5.33  |
| 50053.00 P05 | M-012732- translocase  | 10452.00 | TOMM40   | 955.00  | 7.64  | 5.60  |
| 50053.00 P06 | M-013680- nuclear RN   | 10482.00 | NXF1     | 521.00  | 16.70 | 14.66 |
| 50053.00 P07 | M-012168- HCLS1 asso   | 10456.00 | HAX1     | 2068.00 | 8.37  | 6.33  |
| 50053.00 P08 | M-016219- PCI domair   | 10480.00 | PCID1    | 479.00  | 6.89  | 4.85  |
| 50053.00 P09 | M-011741- glycoprotei  | 10457.00 | GPNMB    | 1146.00 | 3.75  | 1.71  |
| 50053.00 P10 | M-007626- solute carri | 10479.00 | SLC9A6   | 1669.00 | 3.18  | 1.14  |
| 50053.00 P11 | M-010961- C-type lecti | 10462.00 | CLEC10A  | 1916.00 | 4.28  | 2.24  |
| 50053.00 P12 | M-007476- solute carri | 10478.00 | SLC25A17 | 310.00  | 15.16 | 13.12 |
| 50053.00 P13 | M-007530- solute carri | 10463.00 | SLC30A9  | 1095.00 | 6.30  | 4.26  |
| 50053.00 P14 | M-006929- tripartite r | 10475.00 | TRIM38   | 2241.00 | 1.47  | 0.57  |
| 50053.00 P15 | M-020125- chromoson    | 10464.00 | C13orf24 | 2770.00 | 7.22  | 5.18  |
| 50053.00 P16 | M-020630- prefoldin si | 10471.00 | PFDN6    | 1735.00 | 3.11  | 1.07  |
| 50053.00 P17 | M-012992- sperm asso   | 10407.00 | SPAG11B  | 2977.00 | 6.79  | 4.75  |
| 50053.00 P18 | M-003864- translocase  | 10469.00 | TIMM44   | 1297.00 | 3.08  | 1.04  |
| 50053.00 P19 | M-006593- zinc finger  | 7767.00  | ZNF224   | 2629.00 | 4.68  | 2.64  |
| 50053.00 P20 | M-019123- componen     | 10466.00 | COG5     | 2175.00 | 1.75  | 0.29  |
| 50053.00 P21 | M-012203- olfactomec   | 10439.00 | OLFM1    | 2328.00 | 0.52  | 1.52  |
| 50053.00 P23 | M-006909- zinc finger  | 9658.00  | ZNF516   | 3090.00 | 0.23  | 1.81  |
|              |                        |          | median   | 2482.50 | 2.04  | 1.05  |
|              |                        |          | 3MAD     |         |       | 3.15  |
|              |                        |          | MADc     |         |       | 1.55  |
| 50053.00 C22 |                        |          |          | 2704.00 | 7.99  |       |
| 50053.00 D22 |                        | 4245.00  | 21.96    |         |       |       |
| 50053.00 E22 |                        |          |          | 3304.00 | 12.02 |       |
| 50053.00 F22 |                        |          |          | 3239.00 | 11.30 |       |
|              |                        |          | mn       | 3082.33 | 10.43 |       |

|              |                                   |                   |         |       |
|--------------|-----------------------------------|-------------------|---------|-------|
|              |                                   | sd                | 329.25  | 2.15  |
| 50053.00 G22 |                                   |                   | 1323.00 | 1.51  |
| 50053.00 H22 |                                   |                   | 1447.00 | 0.14  |
| 50053.00 I22 |                                   |                   | 1237.00 | 0.81  |
| 50053.00 J22 |                                   |                   | 1013.00 | 0.79  |
|              |                                   | mn                | 1232.33 | 0.58  |
|              |                                   | sd                | 217.04  | 0.38  |
|              |                                   | 3psSD             |         | 6.45  |
|              |                                   | 3ngSD             |         | 1.14  |
|              |                                   | SumSD             |         | 7.59  |
|              |                                   | DiffMn            |         | 9.86  |
|              |                                   | SmovrDiff         |         | 0.77  |
|              |                                   | 1minus            |         | 0.23  |
| 50053.00 G03 | M-003290- polo-like ki            | 5347.00 PLK1 SMAR | 165.00  | 14.55 |
| 50053.00 H03 | M-003290- polo-like ki            | 5347.00 PLK1 SMAR | 126.00  | 3.17  |
| 50053.00 I03 | D-001206- siControl non-targetinç |                   | 1219.00 | 1.23  |
| 50053.00 J03 | D-001206- siControl non-targetinç |                   | 1938.00 | 1.91  |
| 50053.00 K03 | D-001600- ( siGLO RISC-free siRNA |                   | 4995.00 | 1.64  |
| 50053.00 L03 | D-001600- ( siGLO RISC-free siRNA |                   | 6030.00 | 3.20  |

| rZ    | Cell Count | % inf | Abs Dev | rZ    | Cell Count | % inf | Abs Dev | rZ    |
|-------|------------|-------|---------|-------|------------|-------|---------|-------|
| 0.68  | 2085.00    | 1.20  | 0.69    | -0.45 | 2123.00    | 2.78  | 0.32    | 0.20  |
| 0.24  | 985.00     | 2.03  | 0.14    | 0.09  | 1447.00    | 1.24  | 1.22    | -0.74 |
| 0.10  | 1822.00    | 1.87  | 0.02    | -0.02 | 3004.00    | 1.20  | 1.26    | -0.77 |
| 3.15  | 2095.00    | 0.62  | 1.27    | -0.82 | 2911.00    | 1.34  | 1.12    | -0.68 |
| -0.20 | 1306.00    | 1.45  | 0.44    | -0.28 | 3401.00    | 2.29  | 0.17    | -0.10 |
| 0.23  | 1165.00    | 0.94  | 0.95    | -0.61 | 2565.00    | 1.56  | 0.90    | -0.55 |
| 1.89  | 591.00     | 4.23  | 2.34    | 1.51  | 1059.00    | 3.31  | 0.85    | 0.52  |
| 0.16  | 1257.00    | 10.02 | 8.13    | 5.26  | 2055.00    | 2.19  | 0.27    | -0.16 |
| -0.53 | 1155.00    | 3.90  | 2.01    | 1.30  | 1861.00    | 2.42  | 0.04    | -0.02 |
| 1.51  | 1424.00    | 1.97  | 0.08    | 0.05  | 3401.00    | 2.97  | 0.51    | 0.31  |
| 4.17  | 1059.00    | 1.13  | 0.76    | -0.49 | 1172.00    | 6.91  | 4.45    | 2.72  |
| 1.02  | 1319.00    | 1.21  | 0.68    | -0.44 | 1663.00    | 5.83  | 3.37    | 2.06  |
| 2.25  | 560.00     | 3.21  | 1.32    | 0.85  | 2314.00    | 2.16  | 0.30    | -0.18 |
| -0.52 | 952.00     | 3.78  | 1.89    | 1.22  | 1276.00    | 2.35  | 0.11    | -0.06 |
| 1.52  | 828.00     | 2.66  | 0.77    | 0.49  | 1133.00    | 4.59  | 2.13    | 1.30  |
| 3.13  | 1897.00    | 6.80  | 4.91    | 3.17  | 2614.00    | 4.67  | 2.21    | 1.35  |
| 5.40  | 1035.00    | 5.12  | 3.23    | 2.09  | 583.00     | 9.61  | 7.15    | 4.36  |
| 0.92  | 1323.00    | 4.16  | 2.27    | 1.46  | 1662.00    | 3.91  | 1.45    | 0.89  |
| 1.76  | 1433.00    | 4.54  | 2.65    | 1.71  | 1746.00    | 4.12  | 1.66    | 1.02  |
| 0.56  | 479.00     | 5.64  | 3.75    | 2.42  | 437.00     | 8.47  | 6.01    | 3.67  |
| 0.38  | 984.00     | 0.41  | 1.48    | -0.96 | 1828.00    | 0.16  | 2.30    | -1.40 |
| 0.59  | 1610.00    | 0.68  | 1.21    | -0.78 | 2314.00    | 0.52  | 1.94    | -1.18 |
| 4.83  | 3469.00    | 2.83  | 0.94    | 0.60  | 4074.00    | 2.06  | 0.40    | -0.24 |
| 1.90  | 3525.00    | 1.70  | 0.19    | -0.12 | 4435.00    | 0.59  | 1.87    | -1.14 |
| -0.27 | 2196.00    | 1.05  | 0.84    | -0.55 | 1703.00    | 0.18  | 2.28    | -1.39 |
| -0.04 | 1384.00    | 0.72  | 1.17    | -0.76 | 1840.00    | 0.60  | 1.86    | -1.13 |
| 0.28  | 1816.00    | 0.50  | 1.39    | -0.90 | 1498.00    | 1.20  | 1.26    | -0.77 |
| -0.26 | 1326.00    | 0.45  | 1.44    | -0.93 | 1170.00    | 0.34  | 2.12    | -1.29 |
| -0.19 | 2761.00    | 0.58  | 1.31    | -0.85 | 2950.00    | 1.39  | 1.07    | -0.65 |
| 1.00  | 1331.00    | 0.23  | 1.66    | -1.08 | 2232.00    | 1.43  | 1.03    | -0.62 |
| 0.31  | 1623.00    | 0.68  | 1.21    | -0.78 | 1791.00    | 0.00  | 2.46    | -1.50 |
| -0.77 | 2029.00    | 0.20  | 1.69    | -1.10 | 1756.00    | 0.40  | 2.06    | -1.26 |
| 0.43  | 2370.00    | 1.27  | 0.62    | -0.40 | 3126.00    | 3.29  | 0.83    | 0.51  |
| 1.08  | 1555.00    | 3.60  | 1.71    | 1.10  | 2228.00    | 2.78  | 0.32    | 0.20  |
| -0.77 | 1660.00    | 1.57  | 0.32    | -0.21 | 1946.00    | 0.41  | 2.05    | -1.25 |
| 0.99  | 2819.00    | 0.60  | 1.29    | -0.83 | 3821.00    | 0.29  | 2.17    | -1.32 |
| -0.87 | 3062.00    | 1.08  | 0.81    | -0.53 | 3795.00    | 4.14  | 1.68    | 1.03  |
| -0.67 | 2523.00    | 1.27  | 0.62    | -0.40 | 3741.00    | 0.80  | 1.66    | -1.01 |
| -0.63 | 2238.00    | 0.22  | 1.67    | -1.08 | 2546.00    | 0.82  | 1.64    | -1.00 |
| -0.28 | 1506.00    | 0.33  | 1.56    | -1.01 | 1267.00    | 0.55  | 1.91    | -1.16 |
| 1.73  | 2725.00    | 3.01  | 1.12    | 0.72  | 3345.00    | 0.45  | 2.01    | -1.23 |
| 1.46  | 1252.00    | 2.16  | 0.27    | 0.17  | 2675.00    | 1.08  | 1.38    | -0.84 |
| 1.11  | 1676.00    | 2.09  | 0.20    | 0.13  | 2567.00    | 0.70  | 1.76    | -1.07 |
| 1.66  | 3838.00    | 1.56  | 0.33    | -0.21 | 3540.00    | 0.73  | 1.73    | -1.05 |
| 2.47  | 2168.00    | 1.38  | 0.51    | -0.33 | 2304.00    | 2.08  | 0.38    | -0.23 |
| 4.32  | 1907.00    | 6.66  | 4.77    | 3.08  | 2173.00    | 1.84  | 0.62    | -0.38 |



|       |         |       |       |       |         |       |      |       |
|-------|---------|-------|-------|-------|---------|-------|------|-------|
| 0.74  | 2122.00 | 2.03  | 0.14  | 0.09  | 2257.00 | 1.64  | 0.82 | -0.50 |
| -0.12 | 1127.00 | 0.98  | 0.91  | -0.59 | 1618.00 | 1.55  | 0.91 | -0.56 |
| 0.99  | 1523.00 | 4.14  | 2.25  | 1.45  | 1225.00 | 2.12  | 0.34 | -0.20 |
| 1.35  | 921.00  | 2.39  | 0.50  | 0.32  | 824.00  | 2.18  | 0.28 | -0.17 |
| 2.04  | 2714.00 | 6.26  | 4.37  | 2.83  | 3403.00 | 4.14  | 1.68 | 1.03  |
| 2.38  | 1708.00 | 1.46  | 0.43  | -0.28 | 1589.00 | 2.96  | 0.50 | 0.31  |
| 0.34  | 1332.00 | 4.80  | 2.91  | 1.88  | 2096.00 | 6.82  | 4.36 | 2.66  |
| 0.19  | 1571.00 | 1.40  | 0.49  | -0.32 | 1719.00 | 7.56  | 5.10 | 3.12  |
| 0.56  | 1818.00 | 1.98  | 0.09  | 0.06  | 2211.00 | 3.89  | 1.43 | 0.87  |
| -0.18 | 1736.00 | 5.76  | 3.87  | 2.50  | 2411.00 | 3.57  | 1.11 | 0.68  |
| -0.39 | 1788.00 | 0.78  | 1.11  | -0.72 | 2143.00 | 5.46  | 3.00 | 1.83  |
| 0.46  | 3087.00 | 3.98  | 2.09  | 1.35  | 3180.00 | 2.92  | 0.46 | 0.29  |
| 2.29  | 2336.00 | 4.79  | 2.90  | 1.88  | 2616.00 | 3.63  | 1.17 | 0.72  |
| 3.95  | 1346.00 | 4.46  | 2.57  | 1.66  | 1423.00 | 11.03 | 8.57 | 5.23  |
| 0.32  | 2889.00 | 4.88  | 2.99  | 1.93  | 3773.00 | 1.83  | 0.63 | -0.38 |
| 2.99  | 2556.00 | 5.79  | 3.90  | 2.52  | 3677.00 | 5.14  | 2.68 | 1.64  |
| 0.24  | 3198.00 | 2.50  | 0.61  | 0.39  | 3283.00 | 1.86  | 0.60 | -0.37 |
| -0.02 | 2032.00 | 3.35  | 1.46  | 0.94  | 1670.00 | 1.98  | 0.48 | -0.29 |
| 1.23  | 1222.00 | 4.09  | 2.20  | 1.42  | 2683.00 | 2.46  | 0.00 | 0.00  |
| 0.24  | 1438.00 | 2.92  | 1.03  | 0.66  | 1551.00 | 2.19  | 0.27 | -0.16 |
| 2.53  | 985.00  | 3.86  | 1.97  | 1.27  | 908.00  | 2.20  | 0.26 | -0.16 |
| 0.16  | 2024.00 | 2.03  | 0.14  | 0.09  | 2579.00 | 0.81  | 1.65 | -1.00 |
| 0.05  | 1889.00 | 3.76  | 1.87  | 1.21  | 2065.00 | 3.39  | 0.93 | 0.57  |
| 3.20  | 2426.00 | 1.36  | 0.53  | -0.34 | 2823.00 | 8.18  | 5.72 | 3.49  |
| 0.79  | 1824.00 | 4.44  | 2.55  | 1.65  | 2878.00 | 3.51  | 1.05 | 0.64  |
| 1.52  | 2230.00 | 4.89  | 3.00  | 1.94  | 3615.00 | 3.90  | 1.44 | 0.88  |
| 0.80  | 1157.00 | 1.56  | 0.33  | -0.22 | 1808.00 | 1.55  | 0.91 | -0.55 |
| 0.33  | 1769.00 | 2.09  | 0.20  | 0.13  | 2378.00 | 4.42  | 1.96 | 1.20  |
| 0.99  | 1460.00 | 1.64  | 0.25  | -0.16 | 1948.00 | 4.00  | 1.54 | 0.94  |
| 2.91  | 1361.00 | 3.01  | 1.12  | 0.72  | 1334.00 | 1.20  | 1.26 | -0.77 |
| 0.93  | 2456.00 | 2.85  | 0.96  | 0.62  | 3277.00 | 2.90  | 0.44 | 0.27  |
| 3.32  | 3884.00 | 2.68  | 0.79  | 0.51  | 3883.00 | 3.19  | 0.73 | 0.45  |
| 3.55  | 3218.00 | 1.46  | 0.43  | -0.28 | 4485.00 | 4.73  | 2.27 | 1.39  |
| -0.50 | 3734.00 | 0.35  | 1.54  | -1.00 | 4294.00 | 1.75  | 0.71 | -0.43 |
| -0.14 | 3356.00 | 1.22  | 0.67  | -0.43 | 3623.00 | 1.21  | 1.25 | -0.76 |
| 0.41  | 1569.00 | 2.10  | 0.21  | 0.14  | 1043.00 | 2.40  | 0.06 | -0.04 |
| -0.59 | 639.00  | 8.45  | 6.56  | 4.24  | 1132.00 | 2.03  | 0.43 | -0.26 |
| -0.28 | 1132.00 | 7.60  | 5.71  | 3.69  | 1373.00 | 1.31  | 1.15 | -0.70 |
| -0.96 | 1438.00 | 3.20  | 1.31  | 0.84  | 1883.00 | 0.37  | 2.09 | -1.27 |
| -0.23 | 3302.00 | 2.36  | 0.47  | 0.30  | 4015.00 | 0.75  | 1.71 | -1.04 |
| -0.01 | 785.00  | 3.57  | 1.68  | 1.08  | 1943.00 | 0.93  | 1.53 | -0.93 |
| -0.45 | 1637.00 | 3.12  | 1.23  | 0.79  | 1720.00 | 0.76  | 1.70 | -1.04 |
| 0.63  | 1094.00 | 6.12  | 4.23  | 2.74  | 1480.00 | 1.28  | 1.18 | -0.72 |
| -0.56 | 1888.00 | 2.86  | 0.97  | 0.63  | 3245.00 | 0.09  | 2.37 | -1.44 |
| -0.44 | 952.00  | 3.47  | 1.58  | 1.02  | 1498.00 | 0.87  | 1.59 | -0.97 |
| 0.20  | 1709.00 | 1.93  | 0.04  | 0.03  | 2411.00 | 0.75  | 1.71 | -1.04 |
| 2.14  | 131.00  | 17.56 | 15.67 | 10.13 | 91.00   | 3.30  | 0.84 | 0.51  |



|       |         |       |       |       |         |       |      |       |
|-------|---------|-------|-------|-------|---------|-------|------|-------|
| -0.57 | 1691.00 | 2.66  | 0.77  | 0.50  | 1699.00 | 0.94  | 1.52 | -0.92 |
| -0.76 | 2416.00 | 2.77  | 0.88  | 0.57  | 2878.00 | 0.87  | 1.59 | -0.97 |
| -0.33 | 2165.00 | 0.97  | 0.92  | -0.60 | 3291.00 | 0.85  | 1.61 | -0.98 |
| -0.98 | 2121.00 | 1.18  | 0.71  | -0.46 | 2025.00 | 0.15  | 2.31 | -1.41 |
| -0.62 | 2334.00 | 5.01  | 3.12  | 2.02  | 2381.00 | 0.13  | 2.33 | -1.42 |
| 0.08  | 2622.00 | 1.07  | 0.82  | -0.53 | 3013.00 | 0.27  | 2.19 | -1.34 |
| -0.05 | 3266.00 | 1.71  | 0.18  | -0.11 | 3708.00 | 0.19  | 2.27 | -1.38 |
| 0.35  | 3068.00 | 1.89  | 0.00  | 0.00  | 2546.00 | 1.10  | 1.36 | -0.83 |
| -0.50 | 1105.00 | 4.52  | 2.63  | 1.70  | 1559.00 | 2.57  | 0.11 | 0.07  |
| -0.63 | 3346.00 | 1.05  | 0.84  | -0.55 | 3283.00 | 0.85  | 1.61 | -0.98 |
| 0.07  | 1580.00 | 5.19  | 3.30  | 2.13  | 2330.00 | 2.40  | 0.06 | -0.03 |
| -0.05 | 1763.00 | 4.08  | 2.19  | 1.42  | 1934.00 | 0.78  | 1.68 | -1.03 |
| 0.93  | 564.00  | 14.89 | 13.00 | 8.40  | 253.00  | 7.11  | 4.65 | 2.84  |
| 0.01  | 1886.00 | 2.55  | 0.66  | 0.42  | 2635.00 | 2.16  | 0.30 | -0.18 |
| -0.43 | 1645.00 | 3.34  | 1.45  | 0.94  | 1704.00 | 4.23  | 1.77 | 1.08  |
| -0.52 | 367.00  | 11.72 | 9.83  | 6.35  | 653.00  | 10.41 | 7.95 | 4.86  |
| -0.24 | 1792.00 | 1.73  | 0.16  | -0.10 | 1513.00 | 1.98  | 0.48 | -0.29 |
| -0.74 | 1302.00 | 2.07  | 0.18  | 0.12  | 2652.00 | 1.28  | 1.18 | -0.72 |
| -0.57 | 1001.00 | 3.20  | 1.31  | 0.84  | 1457.00 | 1.17  | 1.29 | -0.79 |
| -0.25 | 1673.00 | 3.89  | 2.00  | 1.29  | 2480.00 | 2.58  | 0.12 | 0.08  |
| -0.80 | 2547.00 | 3.06  | 1.17  | 0.76  | 2549.00 | 1.45  | 1.01 | -0.61 |
| 0.12  | 1149.00 | 2.09  | 0.20  | 0.13  | 1268.00 | 1.97  | 0.49 | -0.30 |
| -0.32 | 2475.00 | 4.77  | 2.88  | 1.86  | 2651.00 | 2.57  | 0.11 | 0.07  |
| 0.97  | 3153.00 | 3.52  | 1.63  | 1.05  | 3787.00 | 4.15  | 1.69 | 1.03  |
| -0.48 | 1315.00 | 5.25  | 3.36  | 2.17  | 2000.00 | 2.75  | 0.29 | 0.18  |
| 0.03  | 2726.00 | 1.76  | 0.13  | -0.08 | 3335.00 | 2.19  | 0.27 | -0.16 |
| 0.94  | 3848.00 | 3.66  | 1.77  | 1.15  | 3519.00 | 2.53  | 0.07 | 0.04  |
| 0.14  | 2416.00 | 1.57  | 0.32  | -0.21 | 2561.00 | 1.48  | 0.98 | -0.59 |
| 1.18  | 1959.00 | 2.55  | 0.66  | 0.43  | 1696.00 | 3.24  | 0.78 | 0.48  |
| 0.06  | 3158.00 | 0.76  | 1.13  | -0.73 | 2549.00 | 2.82  | 0.36 | 0.22  |
| 1.66  | 3850.00 | 4.78  | 2.89  | 1.87  | 3795.00 | 7.64  | 5.18 | 3.16  |
| -0.30 | 3184.00 | 1.26  | 0.63  | -0.41 | 3092.00 | 1.55  | 0.91 | -0.55 |
| 2.78  | 2169.00 | 2.77  | 0.88  | 0.57  | 2289.00 | 2.36  | 0.10 | -0.06 |
| -0.33 | 1560.00 | 2.50  | 0.61  | 0.39  | 1704.00 | 2.88  | 0.42 | 0.26  |
| 0.18  | 1687.00 | 1.42  | 0.47  | -0.30 | 1934.00 | 1.45  | 1.01 | -0.62 |
| -0.41 | 1981.00 | 2.07  | 0.18  | 0.11  | 2811.00 | 2.92  | 0.46 | 0.28  |
| -0.11 | 3960.00 | 2.53  | 0.64  | 0.41  | 3344.00 | 1.02  | 1.44 | -0.88 |
| 0.22  | 1714.00 | 2.98  | 1.09  | 0.70  | 1093.00 | 2.29  | 0.17 | -0.10 |
| 3.99  | 2067.00 | 4.45  | 2.56  | 1.65  | 1476.00 | 5.89  | 3.43 | 2.10  |
| -0.66 | 1817.00 | 4.73  | 2.84  | 1.84  | 1522.00 | 3.48  | 1.02 | 0.63  |
| -0.14 | 2625.00 | 2.32  | 0.43  | 0.28  | 2399.00 | 3.96  | 1.50 | 0.92  |
| -0.51 | 2529.00 | 2.25  | 0.36  | 0.23  | 3146.00 | 3.40  | 0.94 | 0.58  |
| -0.18 | 1940.00 | 1.60  | 0.29  | -0.19 | 1945.00 | 1.90  | 0.56 | -0.34 |
| -0.03 | 2880.00 | 6.91  | 5.02  | 3.24  | 2591.00 | 6.06  | 3.60 | 2.20  |
| 1.29  | 3724.00 | 3.09  | 1.20  | 0.77  | 3951.00 | 2.25  | 0.21 | -0.12 |
| -0.87 | 2427.00 | 2.23  | 0.34  | 0.22  | 1785.00 | 2.47  | 0.00 | 0.00  |
| -0.77 | 3208.00 | 1.40  | 0.49  | -0.32 | 3974.00 | 2.57  | 0.11 | 0.07  |

|       |         |      |      |       |         |       |      |       |
|-------|---------|------|------|-------|---------|-------|------|-------|
| -1.08 | 2328.00 | 1.37 | 0.52 | -0.33 | 2262.00 | 3.01  | 0.55 | 0.34  |
| -1.06 | 2193.00 | 1.78 | 0.11 | -0.07 | 2364.00 | 4.65  | 2.19 | 1.34  |
| -1.26 | 2030.00 | 1.48 | 0.41 | -0.27 | 1826.00 | 2.57  | 0.11 | 0.07  |
| -0.77 | 2601.00 | 1.92 | 0.03 | 0.02  | 2059.00 | 5.54  | 3.08 | 1.88  |
| -1.31 | 1512.00 | 1.06 | 0.83 | -0.54 | 1140.00 | 3.68  | 1.22 | 0.75  |
| -0.23 | 713.00  | 2.38 | 0.49 | 0.32  | 754.00  | 7.03  | 4.57 | 2.79  |
| -1.26 | 1842.00 | 0.81 | 1.08 | -0.70 | 2034.00 | 1.77  | 0.69 | -0.42 |
| 1.27  | 745.00  | 1.88 | 0.01 | -0.01 | 1248.00 | 5.85  | 3.39 | 2.07  |
| -1.13 | 1812.00 | 0.72 | 1.17 | -0.76 | 1801.00 | 3.50  | 1.04 | 0.64  |
| -0.65 | 1322.00 | 1.21 | 0.68 | -0.44 | 1378.00 | 1.96  | 0.50 | -0.30 |
| -1.22 | 1206.00 | 1.24 | 0.65 | -0.42 | 1480.00 | 4.59  | 2.13 | 1.30  |
| -1.02 | 1975.00 | 0.35 | 1.54 | -0.99 | 2227.00 | 1.98  | 0.48 | -0.29 |
| -0.73 | 1537.00 | 0.33 | 1.56 | -1.01 | 1426.00 | 5.89  | 3.43 | 2.10  |
| -1.16 | 775.00  | 0.52 | 1.37 | -0.89 | 760.00  | 10.26 | 7.80 | 4.76  |
| -1.08 | 1534.00 | 1.76 | 0.13 | -0.09 | 1001.00 | 5.39  | 2.93 | 1.79  |
| -1.13 | 2471.00 | 1.17 | 0.72 | -0.46 | 2912.00 | 2.85  | 0.39 | 0.24  |
| -1.05 | 3152.00 | 0.67 | 1.22 | -0.79 | 2836.00 | 1.27  | 1.19 | -0.72 |
| -1.08 | 1380.00 | 1.38 | 0.51 | -0.33 | 1208.00 | 7.62  | 5.16 | 3.15  |
| -0.78 | 3649.00 | 1.86 | 0.03 | -0.02 | 3816.00 | 2.54  | 0.08 | 0.05  |
| -1.27 | 2616.00 | 1.11 | 0.78 | -0.51 | 3442.00 | 2.76  | 0.30 | 0.18  |
| -0.77 | 2657.00 | 1.69 | 0.20 | -0.13 | 3150.00 | 0.95  | 1.51 | -0.92 |
| -0.84 | 2251.00 | 3.51 | 1.62 | 1.05  | 2468.00 | 2.92  | 0.46 | 0.28  |
| 1.34  | 2733.00 | 2.23 | 0.34 | 0.22  | 2898.00 | 7.97  | 5.51 | 3.37  |
| -0.06 | 2700.00 | 4.33 | 2.44 | 1.58  | 2485.00 | 5.27  | 2.81 | 1.72  |
| -0.10 | 1884.00 | 1.33 | 0.56 | -0.37 | 1831.00 | 1.86  | 0.60 | -0.37 |
| 0.11  | 3344.00 | 1.76 | 0.13 | -0.08 | 3087.00 | 2.11  | 0.35 | -0.21 |
| 0.31  | 2510.00 | 2.87 | 0.98 | 0.63  | 1764.00 | 2.04  | 0.42 | -0.25 |
| 0.02  | 1693.00 | 2.01 | 0.12 | 0.08  | 2031.00 | 0.74  | 1.72 | -1.05 |
| -0.44 | 2470.00 | 0.89 | 1.00 | -0.65 | 2505.00 | 0.96  | 1.50 | -0.91 |
| 1.28  | 2341.00 | 1.28 | 0.61 | -0.39 | 2618.00 | 1.15  | 1.31 | -0.80 |
| -0.16 | 1978.00 | 1.26 | 0.63 | -0.41 | 2318.00 | 1.08  | 1.38 | -0.84 |
| -0.56 | 2470.00 | 1.74 | 0.15 | -0.10 | 2557.00 | 1.56  | 0.90 | -0.54 |
| 0.26  | 1604.00 | 1.37 | 0.52 | -0.34 | 1241.00 | 0.89  | 1.57 | -0.96 |
| -0.21 | 1732.00 | 1.44 | 0.45 | -0.29 | 2522.00 | 1.51  | 0.95 | -0.58 |
| 0.14  | 2534.00 | 0.39 | 1.50 | -0.97 | 2549.00 | 2.71  | 0.25 | 0.15  |
| -0.85 | 2266.00 | 0.31 | 1.58 | -1.02 | 2114.00 | 2.79  | 0.33 | 0.20  |
| 1.30  | 3158.00 | 2.91 | 1.02 | 0.66  | 3786.00 | 2.38  | 0.08 | -0.05 |
| -0.02 | 4402.00 | 0.32 | 1.57 | -1.02 | 3784.00 | 1.51  | 0.95 | -0.58 |
| -1.03 | 1404.00 | 0.43 | 1.46 | -0.95 | 1469.00 | 2.86  | 0.40 | 0.25  |
| 0.04  | 2965.00 | 1.79 | 0.10 | -0.07 | 2715.00 | 1.99  | 0.47 | -0.29 |
| 2.43  | 972.00  | 1.44 | 0.45 | -0.29 | 1263.00 | 2.45  | 0.01 | 0.00  |
| -0.50 | 2001.00 | 2.40 | 0.51 | 0.33  | 2310.00 | 1.34  | 1.12 | -0.68 |
| 0.21  | 2607.00 | 2.19 | 0.30 | 0.19  | 2403.00 | 1.41  | 1.05 | -0.64 |
| 0.89  | 4120.00 | 2.72 | 0.83 | 0.53  | 3556.00 | 1.10  | 1.36 | -0.83 |
| 2.71  | 3301.00 | 3.85 | 1.96 | 1.26  | 2962.00 | 1.79  | 0.67 | -0.41 |
| 0.32  | 2107.00 | 0.57 | 1.32 | -0.85 | 1744.00 | 2.47  | 0.01 | 0.01  |
| 0.43  | 1803.00 | 1.28 | 0.61 | -0.40 | 2117.00 | 3.12  | 0.66 | 0.40  |

|       |         |      |      |       |         |      |      |       |
|-------|---------|------|------|-------|---------|------|------|-------|
| -0.61 | 1834.00 | 3.98 | 2.09 | 1.35  | 1574.00 | 2.03 | 0.43 | -0.26 |
| -0.54 | 2050.00 | 0.78 | 1.11 | -0.72 | 1958.00 | 1.28 | 1.18 | -0.72 |
| -0.29 | 2546.00 | 0.12 | 1.77 | -1.15 | 1988.00 | 0.35 | 2.11 | -1.28 |
| 1.22  | 1507.00 | 1.39 | 0.50 | -0.32 | 1494.00 | 5.29 | 2.83 | 1.73  |
| 1.48  | 3845.00 | 4.50 | 2.61 | 1.69  | 3167.00 | 2.40 | 0.06 | -0.04 |
| 0.36  | 1732.00 | 0.75 | 1.14 | -0.74 | 1419.00 | 2.40 | 0.06 | -0.04 |
| 1.34  | 1911.00 | 1.47 | 0.42 | -0.28 | 2700.00 | 2.85 | 0.39 | 0.24  |
| 0.94  | 2326.00 | 1.59 | 0.30 | -0.19 | 2388.00 | 2.43 | 0.03 | -0.02 |
| -0.06 | 2712.00 | 1.99 | 0.10 | 0.06  | 3373.00 | 1.90 | 0.56 | -0.34 |
| 2.58  | 1494.00 | 1.54 | 0.35 | -0.23 | 2382.00 | 0.63 | 1.83 | -1.12 |
| -0.10 | 3985.00 | 0.10 | 1.79 | -1.16 | 3466.00 | 0.29 | 2.17 | -1.32 |
| -0.76 | 1087.00 | 0.55 | 1.34 | -0.87 | 1028.00 | 0.68 | 1.78 | -1.08 |
| -0.70 | 2523.00 | 1.51 | 0.38 | -0.25 | 2929.00 | 2.66 | 0.20 | 0.13  |
| -1.12 | 4376.00 | 0.87 | 1.02 | -0.66 | 4321.00 | 2.11 | 0.35 | -0.21 |
| -0.43 | 2693.00 | 1.89 | 0.00 | 0.00  | 3160.00 | 1.65 | 0.81 | -0.50 |
| -0.71 | 3281.00 | 0.82 | 1.07 | -0.69 | 3291.00 | 4.44 | 1.98 | 1.21  |
| -0.93 | 3318.00 | 1.63 | 0.26 | -0.17 | 3248.00 | 2.62 | 0.16 | 0.10  |
| -0.22 | 3886.00 | 3.35 | 1.46 | 0.94  | 4036.00 | 0.62 | 1.84 | -1.12 |
| -0.19 | 2249.00 | 2.49 | 0.60 | 0.39  | 2912.00 | 4.09 | 1.63 | 0.99  |
| -0.86 | 2086.00 | 0.43 | 1.46 | -0.94 | 1775.00 | 1.24 | 1.22 | -0.74 |
| -0.61 | 588.00  | 1.53 | 0.36 | -0.23 | 1013.00 | 5.33 | 2.87 | 1.75  |
| 0.12  | 2345.00 | 2.43 | 0.54 | 0.35  | 3316.00 | 3.02 | 0.56 | 0.34  |
| 0.39  | 3491.00 | 2.38 | 0.49 | 0.31  | 4195.00 | 4.20 | 1.74 | 1.06  |
| 0.16  | 2162.00 | 0.69 | 1.20 | -0.77 | 2661.00 | 0.83 | 1.63 | -1.00 |
| -0.19 | 2768.00 | 2.10 | 0.21 | 0.13  | 4498.00 | 3.56 | 1.10 | 0.67  |
| -1.03 | 2171.00 | 0.55 | 1.34 | -0.87 | 2298.00 | 1.44 | 1.02 | -0.62 |
| -1.15 | 2558.00 | 2.89 | 1.00 | 0.65  | 3925.00 | 3.44 | 0.98 | 0.60  |
| -0.97 | 2947.00 | 3.22 | 1.33 | 0.86  | 3936.00 | 2.90 | 0.44 | 0.27  |
| -1.11 | 1320.00 | 1.44 | 0.45 | -0.29 | 1926.00 | 3.74 | 1.28 | 0.78  |
| 0.77  | 5418.00 | 6.37 | 4.48 | 2.89  | 5803.00 | 6.27 | 3.81 | 2.33  |
| -1.09 | 4164.00 | 3.60 | 1.71 | 1.11  | 3638.00 | 4.65 | 2.19 | 1.34  |
| -0.41 | 2858.00 | 2.17 | 0.28 | 0.18  | 3327.00 | 3.10 | 0.64 | 0.39  |
| -0.39 | 2699.00 | 1.78 | 0.11 | -0.07 | 4156.00 | 2.09 | 0.37 | -0.22 |
| 0.03  | 1850.00 | 0.43 | 1.46 | -0.94 | 1794.00 | 4.07 | 1.61 | 0.98  |
| -0.68 | 2025.00 | 3.70 | 1.81 | 1.17  | 1753.00 | 1.88 | 0.58 | -0.35 |
| -0.59 | 2345.00 | 0.68 | 1.21 | -0.78 | 1602.00 | 3.75 | 1.29 | 0.79  |
| 0.01  | 3812.00 | 0.94 | 0.95 | -0.61 | 3648.00 | 3.89 | 1.43 | 0.88  |
| -1.19 | 1279.00 | 0.00 | 1.89 | -1.22 | 1412.00 | 1.84 | 0.62 | -0.38 |
| -0.92 | 1761.00 | 0.28 | 1.61 | -1.04 | 2051.00 | 2.05 | 0.41 | -0.25 |
| 0.82  | 3719.00 | 1.24 | 0.65 | -0.42 | 3051.00 | 4.88 | 2.42 | 1.48  |
| -0.52 | 3503.00 | 1.06 | 0.83 | -0.54 | 2770.00 | 2.24 | 0.22 | -0.13 |
| 0.51  | 1470.00 | 1.97 | 0.08 | 0.05  | 2134.00 | 2.20 | 0.26 | -0.16 |
| -0.56 | 1215.00 | 0.49 | 1.40 | -0.90 | 1172.00 | 2.73 | 0.27 | 0.17  |
| -0.54 | 2110.00 | 0.85 | 1.04 | -0.67 | 1355.00 | 2.21 | 0.25 | -0.15 |
| -0.89 | 2125.00 | 0.24 | 1.65 | -1.07 | 1528.00 | 3.53 | 1.07 | 0.66  |
| -1.23 | 2425.00 | 0.41 | 1.48 | -0.96 | 2196.00 | 4.14 | 1.68 | 1.03  |
| -1.11 | 2516.00 | 0.40 | 1.49 | -0.97 | 1907.00 | 2.78 | 0.32 | 0.20  |

|       |         |      |      |       |         |      |      |       |
|-------|---------|------|------|-------|---------|------|------|-------|
| -1.00 | 1287.00 | 0.54 | 1.35 | -0.87 | 1548.00 | 6.01 | 3.55 | 2.17  |
| -0.88 | 2781.00 | 0.58 | 1.31 | -0.85 | 2183.00 | 3.76 | 1.30 | 0.79  |
| -0.13 | 4143.00 | 1.76 | 0.13 | -0.08 | 2992.00 | 3.61 | 1.15 | 0.70  |
| -0.87 | 2813.00 | 3.73 | 1.84 | 1.19  | 2448.00 | 6.99 | 4.53 | 2.76  |
| -1.02 | 4217.00 | 1.45 | 0.44 | -0.29 | 3316.00 | 2.86 | 0.40 | 0.25  |
| -1.18 | 3713.00 | 0.51 | 1.38 | -0.89 | 3081.00 | 4.93 | 2.47 | 1.51  |
| -1.09 | 2158.00 | 1.39 | 0.50 | -0.32 | 2076.00 | 2.07 | 0.39 | -0.24 |
| 0.45  | 2041.00 | 1.37 | 0.52 | -0.34 | 3607.00 | 3.88 | 1.42 | 0.87  |
| -1.05 | 2832.00 | 1.06 | 0.83 | -0.54 | 3162.00 | 2.18 | 0.28 | -0.17 |
| -0.85 | 2133.00 | 0.98 | 0.91 | -0.59 | 2452.00 | 1.10 | 1.36 | -0.83 |
| 0.69  | 2642.00 | 1.74 | 0.15 | -0.10 | 3050.00 | 3.87 | 1.41 | 0.86  |
| 0.29  | 2999.00 | 0.30 | 1.59 | -1.03 | 3064.00 | 1.86 | 0.60 | -0.36 |
| -0.28 | 2329.00 | 0.09 | 1.80 | -1.17 | 1731.00 | 2.95 | 0.49 | 0.30  |
| 0.33  | 2670.00 | 2.77 | 0.88 | 0.57  | 2972.00 | 2.56 | 0.10 | 0.06  |
| -0.07 | 2285.00 | 1.79 | 0.10 | -0.06 | 2758.00 | 1.78 | 0.68 | -0.42 |
| -0.68 | 2799.00 | 0.25 | 1.64 | -1.06 | 2837.00 | 2.71 | 0.25 | 0.16  |
| -0.54 | 1842.00 | 0.22 | 1.67 | -1.08 | 2189.00 | 1.87 | 0.59 | -0.36 |
| -0.55 | 3463.00 | 0.40 | 1.49 | -0.96 | 3118.00 | 4.97 | 2.51 | 1.53  |
| -0.10 | 1853.00 | 0.49 | 1.40 | -0.91 | 1119.00 | 5.72 | 3.26 | 1.99  |
| -1.09 | 2137.00 | 0.56 | 1.33 | -0.86 | 2519.00 | 2.70 | 0.24 | 0.15  |
| -1.03 | 1787.00 | 1.01 | 0.88 | -0.57 | 1169.00 | 2.74 | 0.28 | 0.17  |
| -0.76 | 2233.00 | 0.94 | 0.95 | -0.62 | 1408.00 | 4.76 | 2.30 | 1.40  |
| -0.96 | 3712.00 | 0.38 | 1.51 | -0.98 | 2678.00 | 3.10 | 0.64 | 0.39  |
| -0.23 | 3889.00 | 0.23 | 1.66 | -1.07 | 3105.00 | 4.25 | 1.79 | 1.09  |
| -0.88 | 4374.00 | 0.37 | 1.52 | -0.99 | 3081.00 | 3.47 | 1.01 | 0.62  |
| -0.72 | 2749.00 | 1.13 | 0.76 | -0.49 | 2311.00 | 3.72 | 1.26 | 0.77  |
| 1.23  | 1218.00 | 1.40 | 0.49 | -0.32 | 1699.00 | 4.59 | 2.13 | 1.30  |
| 3.34  | 3145.00 | 5.60 | 3.71 | 2.39  | 4308.00 | 3.32 | 0.86 | 0.53  |
| 0.77  | 2039.00 | 4.02 | 2.13 | 1.38  | 2737.00 | 1.06 | 1.40 | -0.85 |
| -0.69 | 3914.00 | 2.91 | 1.02 | 0.66  | 4505.00 | 2.97 | 0.51 | 0.32  |
| -0.52 | 2166.00 | 0.97 | 0.92 | -0.60 | 3030.00 | 5.48 | 3.02 | 1.84  |
| 0.85  | 2304.00 | 2.47 | 0.58 | 0.38  | 3392.00 | 3.57 | 1.11 | 0.68  |
| 0.10  | 2750.00 | 0.91 | 0.98 | -0.64 | 2675.00 | 0.56 | 1.90 | -1.16 |
| -0.21 | 2104.00 | 3.71 | 1.82 | 1.17  | 3276.00 | 2.08 | 0.38 | -0.23 |
| 1.48  | 1239.00 | 5.49 | 3.60 | 2.32  | 2339.00 | 5.30 | 2.84 | 1.74  |
| 0.52  | 980.00  | 3.16 | 1.27 | 0.82  | 1396.00 | 1.93 | 0.53 | -0.32 |
| -0.28 | 2116.00 | 1.70 | 0.19 | -0.12 | 3086.00 | 1.36 | 1.10 | -0.67 |
| 1.19  | 2268.00 | 3.31 | 1.42 | 0.91  | 3852.00 | 2.62 | 0.16 | 0.10  |
| 0.47  | 2499.00 | 2.04 | 0.15 | 0.10  | 2693.00 | 2.23 | 0.23 | -0.14 |
| 0.39  | 1909.00 | 2.99 | 1.10 | 0.71  | 3152.00 | 4.60 | 2.14 | 1.31  |
| 0.86  | 901.00  | 5.22 | 3.33 | 2.15  | 1024.00 | 4.00 | 1.54 | 0.94  |
| 0.33  | 2488.00 | 3.22 | 1.33 | 0.86  | 3695.00 | 2.71 | 0.25 | 0.15  |
| -0.21 | 1679.00 | 2.03 | 0.14 | 0.09  | 1958.00 | 2.81 | 0.35 | 0.21  |
| 0.66  | 2036.00 | 4.37 | 2.48 | 1.60  | 3287.00 | 6.27 | 3.81 | 2.33  |
| 1.48  | 2903.00 | 1.89 | 0.00 | 0.00  | 2183.00 | 2.61 | 0.15 | 0.09  |
| 0.56  | 764.00  | 4.45 | 2.56 | 1.65  | 696.00  | 7.76 | 5.30 | 3.24  |
| 0.08  | 3077.00 | 1.30 | 0.59 | -0.38 | 2108.00 | 1.23 | 1.23 | -0.75 |

|         |         |       |         |       |         |       |       |       |
|---------|---------|-------|---------|-------|---------|-------|-------|-------|
| -0.57   | 3718.00 | 0.54  | 1.35    | -0.88 | 3293.00 | 1.49  | 0.97  | -0.59 |
| 0.12    | 2749.00 | 1.38  | 0.51    | -0.33 | 4193.00 | 1.57  | 0.89  | -0.54 |
| 0.61    | 3472.00 | 1.93  | 0.04    | 0.02  | 4071.00 | 4.20  | 1.74  | 1.06  |
| 0.20    | 2541.00 | 1.10  | 0.79    | -0.51 | 3488.00 | 1.72  | 0.74  | -0.45 |
| 0.92    | 1897.00 | 2.48  | 0.59    | 0.38  | 2819.00 | 2.52  | 0.06  | 0.04  |
| 1.19    | 2744.00 | 1.20  | 0.69    | -0.45 | 3517.00 | 7.19  | 4.73  | 2.89  |
| -0.47   | 5479.00 | 1.19  | 0.70    | -0.46 | 5448.00 | 1.82  | 0.64  | -0.39 |
| 0.72    | 2307.00 | 1.00  | 0.89    | -0.58 | 4509.00 | 2.88  | 0.42  | 0.26  |
| 0.24    | 3295.00 | 0.88  | 1.01    | -0.65 | 3901.00 | 2.00  | 0.46  | -0.28 |
| 4.05    | 414.00  | 8.21  | 6.32    | 4.09  | 495.00  | 3.64  | 1.18  | 0.72  |
| -0.50   | 2815.00 | 0.75  | 1.14    | -0.74 | 3758.00 | 1.22  | 1.24  | -0.75 |
| -0.08   | 3275.00 | 0.55  | 1.34    | -0.87 | 3368.00 | 1.28  | 1.18  | -0.72 |
| -1.22   | 1919.00 | 0.36  | 1.53    | -0.99 | 3408.00 | 1.03  | 1.43  | -0.87 |
| -0.20   | 2511.00 | 0.84  | 1.05    | -0.68 | 3918.00 | 1.45  | 1.01  | -0.61 |
| 0.23    | 966.00  | 1.86  | 0.03    | -0.02 | 1745.00 | 2.06  | 0.40  | -0.24 |
| 0.26    | 2717.00 | 2.28  | 0.39    | 0.25  | 3953.00 | 1.34  | 1.12  | -0.68 |
| -0.27   | 4285.00 | 1.89  | 0.00    | 0.00  | 3839.00 | 1.33  | 1.13  | -0.69 |
| -0.03   | 1989.00 | 2.51  | 0.62    | 0.40  | 3037.00 | 2.40  | 0.06  | -0.03 |
| -0.62   | 2345.00 | 1.07  | 0.82    | -0.53 | 1819.00 | 0.38  | 2.08  | -1.26 |
| 1.60    | 2985.00 | 4.66  | 2.77    | 1.79  | 1415.00 | 4.95  | 2.49  | 1.52  |
| 3.44    | 1060.00 | 3.58  | 1.69    | 1.09  | 947.00  | 2.75  | 0.29  | 0.18  |
| 3.61    | 2219.00 | 5.68  | 3.79    | 2.45  | 2316.00 | 7.08  | 4.62  | 2.82  |
| 9.45    | 212.00  | 22.64 | 20.75   | 13.41 | 245.00  | 14.69 | 12.23 | 7.47  |
| 4.08    | 5266.00 | 4.50  | 2.61    | 1.69  | 3769.00 | 4.01  | 1.55  | 0.95  |
| 3.13    | 469.00  | 8.32  | 6.43    | 4.15  | 808.00  | 2.48  | 0.02  | 0.01  |
| 1.11    | 1400.00 | 3.07  | 1.18    | 0.76  | 1175.00 | 3.49  | 1.03  | 0.63  |
| 0.73    | 2730.00 | 4.07  | 2.18    | 1.41  | 2698.00 | 2.85  | 0.39  | 0.24  |
| 1.45    | 1499.00 | 3.67  | 1.78    | 1.15  | 2753.00 | 2.22  | 0.24  | -0.15 |
| 8.46    | 396.00  | 7.32  | 5.43    | 3.51  | 835.00  | 4.79  | 2.33  | 1.42  |
| 2.75    | 1096.00 | 2.37  | 0.48    | 0.31  | 1295.00 | 2.78  | 0.32  | 0.20  |
| -0.36   | 1985.00 | 2.52  | 0.63    | 0.41  | 3595.00 | 1.17  | 1.29  | -0.79 |
| 3.34    | 2157.00 | 3.71  | 1.82    | 1.17  | 2566.00 | 3.04  | 0.58  | 0.36  |
| 0.69    | 1112.00 | 3.33  | 1.44    | 0.93  | 2199.00 | 4.05  | 1.59  | 0.97  |
| 3.06    | 1495.00 | 6.09  | 4.20    | 2.71  | 3294.00 | 5.56  | 3.10  | 1.89  |
| 0.68    | 552.00  | 10.15 | 8.26    | 5.33  | 1603.00 | 3.24  | 0.78  | 0.48  |
| 1.70    | 2257.00 | 5.58  | 3.69    | 2.39  | 4115.00 | 3.11  | 0.65  | 0.40  |
| -0.19   | 1124.00 | 5.16  | 3.27    | 2.11  | 1348.00 | 5.79  | 3.33  | 2.03  |
| -0.98   | 1016.00 | 5.02  | 3.13    | 2.02  | 2044.00 | 1.61  | 0.85  | -0.51 |
| -1.17   | 1207.00 | 4.72  | 2.83    | 1.83  | 1521.00 | 1.64  | 0.82  | -0.50 |
|         | 2105.50 | 1.89  | 1.05    |       | 2393.50 | 2.46  | 1.11  |       |
|         |         |       | 3.14    |       |         |       | 3.32  |       |
|         |         |       | 1.55    |       |         |       | 1.64  |       |
| 2600.00 | 11.73   |       | 2704.00 | 17.53 |         |       |       |       |
| 3960.00 | 13.64   |       | 4558.00 | 23.26 |         |       |       |       |
| 2956.00 | 13.40   |       | 4087.00 | 13.78 |         |       |       |       |
| 3996.00 | 18.97   |       | 4308.00 | 22.15 |         |       |       |       |
| 3378.00 | 14.43   |       | 3914.25 | 19.18 |         |       |       |       |

|         |       |         |       |
|---------|-------|---------|-------|
| 708.05  | 3.14  | 829.46  | 4.37  |
| 1537.00 | 4.03  | 1230.00 | 3.25  |
| 2162.00 | 0.28  | 2240.00 | 2.72  |
| 1507.00 | 0.86  | 1380.00 | 4.28  |
| 1339.00 | 1.49  | 2047.00 | 3.96  |
| 1669.33 | 0.88  | 1889.00 | 3.65  |
| 434.85  | 0.61  | 451.25  | 0.82  |
|         | 9.42  |         | 13.12 |
|         | 1.82  |         | 2.46  |
|         | 11.25 |         | 15.58 |
|         | 13.56 |         | 15.52 |
|         | 0.83  |         | 1.00  |
|         | 0.17  |         | 0.00  |
| 156.00  | 16.03 | 159.00  | 18.24 |
| 93.00   | 20.43 | 153.00  | 19.61 |
| 1612.00 | 1.74  | 2108.00 | 1.71  |
| 2736.00 | 3.03  | 2010.00 | 2.74  |
| 4864.00 | 4.73  | 6181.00 | 5.19  |
| 6060.00 | 3.94  | 4479.00 | 4.89  |

x toxic a,b,c

x debris a,b

x toxic a,b,c

x toxic a,b,c

x debris a

x debris a

x toxic a,b,c

x debris a

x debris a

x toxic a,b,c



x toxic a,b,c

x toxic a,b,c

x toxic c

x debris a,b



y

y

x toxic a,b,c

x toxic a, art b,c  
x toxic a,b,c

x toxic a,b,c

x toxic a,b,c

x toxic b

x toxic b,c

| Plate    | Well       | Gene                                      | GeneID               | Cell Count     | % inf       |
|----------|------------|-------------------------------------------|----------------------|----------------|-------------|
| 50054.00 | A02        | M-019962- stromal antigen 3               | 10734.00 STAG3       | 2670.00        | 2.13        |
| 50054.00 | A04        | M-012331- butyrophilin, subfamily 2, m    | 11120.00 BTN2A1      | 1866.00        | 1.55        |
| 50054.00 | A05        | M-017715- paraneoplastic antigen MA2      | 10687.00 PNMA2       | 2452.00        | 5.51        |
| 50054.00 | A06        | M-019108- butyrophilin, subfamily 3, m    | 11119.00 BTN3A1      | 3056.00        | 0.88        |
| 50054.00 | A07        | M-019114- fucosyltransferase 9 (alpha (   | 10690.00 FUT9        | 2149.00        | 2.70        |
| 50054.00 | A08        | M-019161- butyrophilin, subfamily 3, m    | 11118.00 BTN3A2      | 2183.00        | 1.24        |
| 50054.00 | A09        | M-019437- trinucleotide repeat containi   | 10695.00 TNRC5       | 2180.00        | 2.52        |
| 50054.00 | A10        | M-019765- elastin microfibril interfacer  | 11117.00 EMILIN1     | 1924.00        | 1.66        |
| 50054.00 | A11        | M-005831- corin, serine peptidase         | 10699.00 CORIN       | 1561.00        | 5.00        |
| 50054.00 | A12        | M-009681- 3-hydroxyisobutyrate dehyd      | 11112.00 HIBADH      | 1860.00        | 2.69        |
| 50054.00 | A13        | M-006087- ubiquitin specific peptidase :  | 10713.00 USP39       | 888.00         | 5.63        |
| 50054.00 | A14        | M-005157- katanin p60 (ATPase-contain     | 11104.00 KATNA1      | 1538.00        | 6.05        |
| 50054.00 | A15        | M-026692- polymerase (DNA-directed),      | 10714.00 POLD3       | 1216.00        | 2.47        |
| 50054.00 | A16        | M-012761- arginyltransferase 1            | 11101.00 ATE1        | 2566.00        | 3.55        |
| 50054.00 | A17        | M-010275- LAG1 homolog, ceramide syn      | 10715.00 LASS1       | 1122.00        | 3.21        |
| 50054.00 | A18        | M-006043- protease, serine, 23            | 11098.00 PRSS23      | 2189.00        | 6.85        |
| 50054.00 | A19        | M-020158- adaptor-related protein com     | 10717.00 AP4B1       | 1388.00        | 7.49        |
| 50054.00 | A20        | M-019748- nucleoporin like 2              | 11097.00 NUPL2       | 1397.00        | 4.58        |
| 50054.00 | A21        | M-020192- UDP glucuronosyltransferase     | 10720.00 UGT2B11     | 1504.00        | 5.32        |
| 50054.00 | A23        | M-015180- polymerase (DNA directed),      | 10721.00 POLQ        | 1223.00        | 4.09        |
| 50054.00 | B02        | M-022645- KIAA0953                        | 22979.00 KIAA0953    | 5400.00        | 2.52        |
| 50054.00 | B04        | M-009420- 5'-nucleotidase, cytosolic II   | 22978.00 NT5C2       | 4445.00        | 1.57        |
| 50054.00 | B05        | M-012331- butyrophilin, subfamily 2, m    | 11120.00 BTN2A1      | 4665.00        | 3.09        |
| 50054.00 | B06        | M-010571- TPX2, microtubule-associate     | 22974.00 TPX2        | 1632.00        | 2.82        |
| 50054.00 | B07        | M-020467- Down syndrome critical regi     | 11123.00 DSCR1L2     | 4773.00        | 1.49        |
| 50054.00 | <b>B08</b> | <b>M-015076- double homeobox, 4</b>       | <b>22947.00 DUX4</b> | <b>6390.00</b> | <b>7.04</b> |
| 50054.00 | B09        | M-019741- polymerase (RNA) III (DNA d     | 11128.00 POLR3A      | 4270.00        | 1.66        |
| 50054.00 | B10        | M-003843- dickkopf homolog 1 (Xenopu      | 22943.00 DKK1        | 5833.00        | 1.75        |
| 50054.00 | B11        | M-019710- splicing factor, arginine/serin | 11129.00 SFRS16      | 3801.00        | 3.26        |
| 50054.00 | B12        | M-012459- SH3 and multiple ankyrin re     | 22941.00 SHANK2      | 3387.00        | 0.68        |
| 50054.00 | B13        | M-006830- ZW10 interactor                 | 11130.00 ZWINT       | 3537.00        | 0.79        |
| 50054.00 | B14        | M-008177- elongation factor, RNA polyr    | 22936.00 ELL2        | 4431.00        | 2.03        |
| 50054.00 | B15        | M-005801- calpain 11                      | 11131.00 CAPN11      | 4431.00        | 1.85        |
| 50054.00 | B16        | M-016428- ribose 5-phosphate isomera:     | 22934.00 RPIA        | 5958.00        | 1.02        |
| 50054.00 | B17        | M-019744- PWP1 homolog (S. cerevisiae     | 11137.00 PWP1        | 4275.00        | 1.92        |
| 50054.00 | B18        | M-012834- hyaluronan binding protein <    | 22927.00 HABP4       | 6447.00        | 4.25        |
| 50054.00 | B19        | M-019705- TBC1 domain family, membe       | 11138.00 TBC1D8      | 6183.00        | 2.36        |
| 50054.00 | B20        | M-015327- nuclear cap binding protein :   | 22916.00 NCBP2       | 4127.00        | 3.08        |
| 50054.00 | B21        | M-017668- MYST histone acetyltransfer     | 11143.00 MYST2       | 2909.00        | 1.82        |
| 50054.00 | B23        | M-019760- HRAS-like suppressor 3          | 11145.00 HRASLS3     | 2611.00        | 2.87        |
| 50054.00 | C02        | M-020337- chromosome 9 open reading       | 11094.00 C9orf7      | 5443.00        | 2.41        |
| 50054.00 | C04        | M-019352- chromosome 9 open reading       | 11092.00 C9orf9      | 3117.00        | 3.30        |
| 50054.00 | C05        | M-007388- solute carrier family 12 (pot:  | 10723.00 SLC12A7     | 4350.00        | 5.66        |
| 50054.00 | C06        | M-015678- DnaJ (Hsp40) homolog, subf:     | 11080.00 DNAJB4      | 4740.00        | 5.36        |
| 50054.00 | C07        | M-021351- stromal antigen 2               | 10735.00 STAG2       | 5028.00        | 5.43        |
| 50054.00 | C08        | M-017170- RER1 retention in endoplasm     | 11079.00 RER1        | 3201.00        | 5.12        |

|          |     |                                            |          |          |         |      |
|----------|-----|--------------------------------------------|----------|----------|---------|------|
| 50054.00 | C09 | M-006934- ret finger protein-like 3        | 10738.00 | RFPL3    | 6147.00 | 4.07 |
| 50054.00 | C10 | M-012342- TRIO and F-actin binding pro     | 11078.00 | TRIOBP   | 4323.00 | 4.49 |
| 50054.00 | C11 | M-006935- ret finger protein-like 2        | 10739.00 | RFPL2    | 5982.00 | 4.18 |
| 50054.00 | C12 | M-019695- tubulin polymerization prom      | 11076.00 | TPPP     | 3452.00 | 2.78 |
| 50054.00 | C13 | M-005938- mannan-binding lectin serin      | 10747.00 | MASP2    | 3094.00 | 5.69 |
| 50054.00 | C14 | M-006939- tripartite motif-containing 3    | 11074.00 | TRIM31   | 4250.00 | 6.87 |
| 50054.00 | C15 | M-012279- cell adhesion molecule with      | 10752.00 | CHL1     | 4439.00 | 9.55 |
| 50054.00 | C16 | M-012337- chromosome 10 open readir        | 11067.00 | C10orf10 | 5452.00 | 4.99 |
| 50054.00 | C17 | M-005808- calpain 9                        | 10753.00 | CAPN9    | 4967.00 | 1.83 |
| 50054.00 | C18 | M-012359- U11/U12 snRNP 35K                | 11066.00 | U1SNRNPB | 3694.00 | 3.49 |
| 50054.00 | C19 | M-004311- TRAF3 interacting protein 2      | 10758.00 | TRAF3IP2 | 3269.00 | 2.26 |
| 50054.00 | C20 | M-012355- SRY (sex determining region      | 11063.00 | SOX30    | 5731.00 | 2.76 |
| 50054.00 | C21 | M-013966- placenta-specific 1              | 10761.00 | PLAC1    | 3962.00 | 3.21 |
| 50054.00 | C23 | M-012369- nucleoporin 50kDa                | 10762.00 | NUP50    | 4125.00 | 1.60 |
| 50054.00 | D02 | M-012391- killer cell lectin-like receptor | 22914.00 | KLRK1    | 5129.00 | 0.92 |
| 50054.00 | D04 | M-012392- RNA binding protein, autoan      | 22913.00 | RALY     | 4834.00 | 4.10 |
| 50054.00 | D05 | M-012339- glomulin, FKBP associated pr     | 11146.00 | GLMN     | 5053.00 | 2.45 |
| 50054.00 | D06 | M-017745- WD repeat domain 47              | 22911.00 | WDR47    | 5202.00 | 4.67 |
| 50054.00 | D07 | M-019762- HERV-H LTR-associating 3         | 11147.00 | HHLA3    | 4884.00 | 3.07 |
| 50054.00 | D08 | M-020327- myotubularin related protei      | 22909.00 | MTMR15   | 5338.00 | 3.63 |
| 50054.00 | D09 | M-017669- HERV-H LTR-associating 2         | 11148.00 | HHLA2    | 4542.00 | 3.85 |
| 50054.00 | D10 | M-007280- SAC1 suppressor of actin mu      | 22908.00 | SACM1L   | 4377.00 | 3.84 |
| 50054.00 | D11 | M-012332- blood vessel epicardial subst    | 11149.00 | BVES     | 4006.00 | 8.54 |
| 50054.00 | D12 | M-017196- DEAH (Asp-Glu-Ala-His) box       | 22907.00 | DHX30    | 2868.00 | 5.09 |
| 50054.00 | D13 | M-019758- WD repeat domain 45              | 11152.00 | WDR45    | 2487.00 | 5.03 |
| 50054.00 | D14 | M-020331- trafficking protein, kinesin bi  | 22906.00 | TRAK1    | 2160.00 | 2.13 |
| 50054.00 | D15 | M-016178- adaptor-related protein com      | 11154.00 | AP4S1    | 3564.00 | 3.42 |
| 50054.00 | D16 | M-004743- strawberry notch homolog 2       | 22904.00 | SBNO2    | 4870.00 | 3.33 |
| 50054.00 | D17 | M-026288- LIM domain binding 3             | 11155.00 | LDB3     | 5089.00 | 2.55 |
| 50054.00 | D18 | M-012943- BTB (POZ) domain containin       | 22903.00 | BTBD3    | 5460.00 | 4.40 |
| 50054.00 | D19 | M-019754- LSM6 homolog, U6 small nu        | 11157.00 | LSM6     | 4210.00 | 2.42 |
| 50054.00 | D20 | M-020336- RUN and FYVE domain conta        | 22902.00 | RUFY3    | 4838.00 | 8.62 |
| 50054.00 | D21 | M-017943- ER lipid raft associated 2       | 11160.00 | ERLIN2   | 5360.00 | 7.82 |
| 50054.00 | D23 | M-019683- chromosome 14 open readir        | 11161.00 | C14orf1  | 3268.00 | 1.19 |
| 50054.00 | E02 | M-019096- dihydrouridine synthase 4-lil    | 11062.00 | DUS4L    | 3368.00 | 2.35 |
| 50054.00 | E04 | M-019767- leukocyte cell derived chem      | 11061.00 | LECT1    | 3977.00 | 8.25 |
| 50054.00 | E05 | M-031117- nestin                           | 10763.00 | NES      | 3494.00 | 2.80 |
| 50054.00 | E06 | M-012766- DEAD (Asp-Glu-Ala-Asp) box       | 11056.00 | DDX52    | 4051.00 | 5.01 |
| 50054.00 | E07 | M-015677- HBS1-like (S. cerevisiae)        | 10767.00 | HBS1L    | 2863.00 | 4.68 |
| 50054.00 | E08 | M-019723- zona pellucida binding prote     | 11055.00 | ZPBP     | 3126.00 | 3.01 |
| 50054.00 | E09 | M-016091- cyclic AMP-regulated phosph      | 10777.00 | ARPP-21  | 3184.00 | 4.77 |
| 50054.00 | E10 | M-012334- cleavage and polyadenylatio      | 11052.00 | CPSF6    | 3899.00 | 2.33 |
| 50054.00 | E11 | M-015671- zinc finger protein 271          | 10778.00 | ZNF271   | 4588.00 | 5.14 |
| 50054.00 | E12 | M-012335- nudix (nucleoside diphospha      | 11051.00 | NUDT21   | 2831.00 | 5.09 |
| 50054.00 | E13 | M-012750- zinc finger protein 234          | 10780.00 | ZNF234   | 3837.00 | 5.37 |
| 50054.00 | E14 | M-010705- solute carrier family 35, mer    | 11046.00 | SLC35D2  | 2363.00 | 2.16 |
| 50054.00 | E15 | M-021434- zinc finger protein 266          | 10781.00 | ZNF266   | 3895.00 | 2.62 |

|          |     |                                          |          |          |         |      |
|----------|-----|------------------------------------------|----------|----------|---------|------|
| 50054.00 | E16 | M-012360- uroplakin 1A                   | 11045.00 | UPK1A    | 2702.00 | 4.07 |
| 50054.00 | E17 | M-013359- zinc finger protein 274        | 10782.00 | ZNF274   | 4329.00 | 2.70 |
| 50054.00 | E18 | M-006938- midline 2                      | 11043.00 | MID2     | 5521.00 | 3.22 |
| 50054.00 | E19 | M-007413- solute carrier family 17 (sodi | 10786.00 | SLC17A3  | 4604.00 | 1.78 |
| 50054.00 | E20 | M-012307- UDP-GlcNAc:betaGal beta-1,     | 11041.00 | B3GNT1   | 3262.00 | 1.53 |
| 50054.00 | E21 | M-017684- vesicle-associated membran     | 10791.00 | VAMP5    | 5254.00 | 1.52 |
| 50054.00 | E23 | M-032003- zinc finger protein 273        | 10793.00 | ZNF273   | 3847.00 | 0.55 |
| 50054.00 | F02 | M-008346- arylsulfatase G                | 22901.00 | ARSG     | 2434.00 | 3.08 |
| 50054.00 | F04 | M-004454- caspase recruitment domain     | 22900.00 | CARD8    | 4865.00 | 1.97 |
| 50054.00 | F05 | M-008874- nudix (nucleoside diphospha    | 11162.00 | NUDT6    | 2767.00 | 2.39 |
| 50054.00 | F06 | M-025843- DENN/MADD domain contai        | 22898.00 | DENND3   | 2206.00 | 0.95 |
| 50054.00 | F07 | M-008733- nudix (nucleoside diphospha    | 11164.00 | NUDT5    | 4634.00 | 3.78 |
| 50054.00 | F08 | M-020351- centrosomal protein 164kDa     | 22897.00 | CEP164   | 1794.00 | 0.72 |
| 50054.00 | F09 | M-009801- nudix (nucleoside diphospha    | 11165.00 | NUDT3    | 3798.00 | 9.85 |
| 50054.00 | F10 | M-020354- rabphilin 3A homolog (mous     | 22895.00 | RPH3A    | 4025.00 | 2.04 |
| 50054.00 | F11 | M-019728- SRY (sex determining region    | 11166.00 | SOX21    | 4323.00 | 4.49 |
| 50054.00 | F12 | M-015405- DIS3 mitotic control homolo    | 22894.00 | DIS3     | 3111.00 | 2.57 |
| 50054.00 | F13 | M-015209- PC4 and SFRS1 interacting pr   | 11168.00 | PSIP1    | 2925.00 | 0.38 |
| 50054.00 | F14 | M-020357- bromo adjacent homology d      | 22893.00 | BAHD1    | 3068.00 | 3.16 |
| 50054.00 | F15 | M-019780- WD repeat and HMG-box DN       | 11169.00 | WDHD1    | 3780.00 | 3.78 |
| 50054.00 | F16 | M-020367- zinc finger and BTB domain c   | 22890.00 | ZBTB1    | 2077.00 | 2.26 |
| 50054.00 | F17 | M-012785- family with sequence similar   | 11170.00 | FAM107A  | 3635.00 | 4.04 |
| 50054.00 | F18 | M-020370- KIAA0907                       | 22889.00 | KIAA0907 | 3065.00 | 5.97 |
| 50054.00 | F19 | M-016282- serine/threonine kinase rece   | 11171.00 | STRAP    | 2014.00 | 1.39 |
| 50054.00 | F20 | M-020390- WD repeat domain 37            | 22884.00 | WDR37    | 2469.00 | 3.40 |
| 50054.00 | F21 | M-020470- bromodomain adjacent to zi     | 11176.00 | BAZ2A    | 3776.00 | 0.50 |
| 50054.00 | F23 | M-006941- bromodomain adjacent to zi     | 11177.00 | BAZ1A    | 2813.00 | 3.24 |
| 50054.00 | G02 | M-017544- stonin 1                       | 11037.00 | STON1    | 4306.00 | 4.39 |
| 50054.00 | G04 | M-012752- centaurin, alpha 1             | 11033.00 | CENTA1   | 2250.00 | 3.07 |
| 50054.00 | G05 | M-032012- zinc finger protein 460        | 10794.00 | ZNF460   | 3885.00 | 7.28 |
| 50054.00 | G06 | M-012756- RNA binding protein with mu    | 11030.00 | RBPMS    | 4114.00 | 7.78 |
| 50054.00 | G07 | M-012660- zinc finger protein 268        | 10795.00 | ZNF268   | 4166.00 | 2.76 |
| 50054.00 | G08 | M-019855- leukocyte immunoglobulin-li    | 11027.00 | LILRA2   | 2453.00 | 4.57 |
| 50054.00 | G09 | M-009349- methylenetetrahydrofolate c    | 10797.00 | MTHFD2   | 3515.00 | 5.92 |
| 50054.00 | G10 | M-017686- leukocyte immunoglobulin-li    | 11026.00 | LILRA3   | 4374.00 | 3.96 |
| 50054.00 | G11 | M-020030- ribonuclease P 40kDa subun     | 10799.00 | RPP40    | 3158.00 | 0.92 |
| 50054.00 | G12 | M-008872- leukocyte immunoglobulin-li    | 11025.00 | LILRB3   | 3569.00 | 5.69 |
| 50054.00 | G13 | M-012744- serologically defined colon c  | 10806.00 | SDCCAG8  | 2523.00 | 1.03 |
| 50054.00 | G14 | M-019862- leukocyte immunoglobulin-li    | 11024.00 | LILRA1   | 3194.00 | 2.16 |
| 50054.00 | G15 | M-016427- serologically defined colon c  | 10807.00 | SDCCAG3  | 3124.00 | 3.78 |
| 50054.00 | G16 | M-031769- ventral anterior homeobox 1    | 11023.00 | VAX1     | 2919.00 | 2.02 |
| 50054.00 | G17 | M-012743- START domain containing 10     | 10809.00 | STARD10  | 2616.00 | 2.94 |
| 50054.00 | G18 | M-019792- tudor and KH domain contai     | 11022.00 | TDRKH    | 3921.00 | 4.87 |
| 50054.00 | G19 | M-026087- NADPH oxidase activator 1      | 10811.00 | NOXA1    | 1965.00 | 6.82 |
| 50054.00 | G20 | M-010023- lipoic acid synthetase         | 11019.00 | LIAS     | 2412.00 | 3.44 |
| 50054.00 | G21 | M-016395- UTP14, U3 small nucleolar ri   | 10813.00 | UTP14A   | 1368.00 | 7.75 |
| 50054.00 | G23 | M-012280- complexin 2                    | 10814.00 | CPLX2    | 3295.00 | 2.00 |



|              |                                                  |                   |         |       |
|--------------|--------------------------------------------------|-------------------|---------|-------|
| 50054.00 H02 | M-020396- ankyrin repeat domain 6                | 22881.00 ANKRD6   | 4738.00 | 6.50  |
| 50054.00 H04 | M-021467- MON1 homolog B (yeast)                 | 22879.00 MON1B    | 5845.00 | 5.73  |
| 50054.00 H05 | M-013990- zinc finger protein 277 pseudorepeat   | 11179.00 ZNF277P  | 3975.00 | 3.47  |
| 50054.00 H06 | M-010645- KIAA1012                               | 22878.00 KIAA1012 | 3628.00 | 0.50  |
| 50054.00 H07 | M-019630- trehalase (brush-border membrane)      | 11181.00 TREH     | 2901.00 | 1.69  |
| 50054.00 H08 | M-010644- pleckstrin homology domain             | 22874.00 PLEKHA6  | 3682.00 | 1.77  |
| 50054.00 H09 | M-007519- solute carrier family 2 (facilitated)  | 11182.00 SLC2A6   | 3081.00 | 3.73  |
| 50054.00 H10 | M-020416- DAZ interacting protein 1              | 22873.00 DZIP1    | 3686.00 | 5.59  |
| 50054.00 H11 | M-015314- indolethylamine N-methyltransferase    | 11185.00 INMT     | 3000.00 | 3.77  |
| 50054.00 H12 | M-014166- SEC31 homolog A (S. cerevisiae)        | 22872.00 SEC31A   | 4594.00 | 2.85  |
| 50054.00 H13 | M-019677- nischarin                              | 11188.00 NISCH    | 3340.00 | 1.62  |
| 50054.00 H14 | M-010278- neuroligin 1                           | 22871.00 NLGN1    | 3866.00 | 3.75  |
| 50054.00 H15 | M-017833- trinucleotide repeat containing        | 11189.00 TNRC4    | 3128.00 | 1.25  |
| 50054.00 H16 | M-020420- SAPS domain family, member             | 22870.00 SAPS1    | 2436.00 | 2.30  |
| 50054.00 H17 | M-012385- WW domain binding protein              | 11193.00 WBP4     | 3893.00 | 2.59  |
| 50054.00 H18 | M-020424- zinc finger protein 510                | 22869.00 ZNF510   | 3290.00 | 3.95  |
| 50054.00 H19 | M-012370- SEC23 interacting protein              | 11196.00 SEC23IP  | 5015.00 | 2.87  |
| 50054.00 H20 | M-020427- FAST kinase domains 2                  | 22868.00 FASTKD2  | 3789.00 | 3.38  |
| 50054.00 H21 | M-009517- suppressor of Ty 16 homolog            | 11198.00 SUPT16H  | 4095.00 | 7.77  |
| 50054.00 H23 | M-019650- polymerase (DNA directed) I            | 11201.00 POLI     | 3344.00 | 2.63  |
| 50054.00 I02 | M-012758- putative nucleic acid binding          | 11017.00 RY1      | 2384.00 | 4.32  |
| 50054.00 I04 | M-005908- kallikrein-related peptidase 1         | 11012.00 KLK11    | 2695.00 | 2.63  |
| 50054.00 I05 | M-013031- complexin 1                            | 10815.00 CPLX1    | 4097.00 | 10.18 |
| 50054.00 I06 | M-012311- coiled-coil domain containing          | 11007.00 CCDC85B  | 3549.00 | 2.28  |
| 50054.00 I07 | M-010641- sialidase 3 (membrane sialidase)       | 10825.00 NEU3     | 3290.00 | 4.01  |
| 50054.00 I08 | M-007499- solute carrier family 27 (facilitated) | 11000.00 SLC27A3  | 2707.00 | 3.81  |
| 50054.00 I09 | M-010276- chromosome 5 open reading frame        | 10826.00 C5orf4   | 2037.00 | 4.42  |
| 50054.00 I10 | M-007500- solute carrier family 27 (facilitated) | 10999.00 SLC27A4  | 2374.00 | 2.65  |
| 50054.00 I11 | M-021041- chromosome 5 open reading frame        | 10827.00 C5orf3   | 2785.00 | 3.05  |
| 50054.00 I12 | M-007501- solute carrier family 27 (facilitated) | 10998.00 SLC27A5  | 2285.00 | 5.73  |
| 50054.00 I13 | M-024859- zinc finger protein 275                | 10838.00 ZNF275   | 2330.00 | 3.35  |
| 50054.00 I14 | M-009658- ilvB (bacterial acetolactate synthase) | 10994.00 ILVBL    | 2519.00 | 2.42  |
| 50054.00 I15 | M-008414- aldehyde dehydrogenase 1 family        | 10840.00 ALDH1L1  | 2702.00 | 0.93  |
| 50054.00 I16 | M-008214- serine dehydratase                     | 10993.00 SDS      | 2242.00 | 2.77  |
| 50054.00 I17 | M-008623- formiminotransferase cyclohydrolase    | 10841.00 FTCD     | 3779.00 | 3.89  |
| 50054.00 I18 | M-026599- splicing factor 3b, subunit 2,         | 10992.00 SF3B2    | 882.00  | 4.76  |
| 50054.00 I19 | M-007663- phosphodiesterase 10A                  | 10846.00 PDE10A   | 2914.00 | 1.00  |
| 50054.00 I20 | M-007560- solute carrier family 38, member       | 10991.00 SLC38A3  | 4100.00 | 1.61  |
| 50054.00 I21 | M-003815- protein phosphatase 1, regulatory      | 10848.00 PPP1R13L | 3092.00 | 2.62  |
| 50054.00 I23 | M-020021- CD3e molecule, epsilon associated      | 10849.00 CD3EAP   | 2509.00 | 1.32  |
| 50054.00 J02 | M-020433- connector enhancer of kinase           | 22866.00 CNKSR2   | 3595.00 | 2.92  |
| 50054.00 J04 | M-020435- SLIT and NTRK-like family, member      | 22865.00 SLITRK3  | 4825.00 | 2.76  |
| 50054.00 J05 | M-005919- kallikrein-related peptidase 8         | 11202.00 KLK8     | 4276.00 | 4.77  |
| 50054.00 J06 | M-012950- R3H domain containing 2                | 22864.00 R3HDM2   | 4535.00 | 3.09  |
| 50054.00 J07 | M-008449- proline synthetase co-transcription    | 11212.00 PROSC    | 2697.00 | 7.08  |
| 50054.00 J08 | M-020438- KIAA0831                               | 22863.00 KIAA0831 | 3302.00 | 3.42  |
| 50054.00 J09 | M-012372- mitochondrial ribosomal protein        | 11222.00 MRPL3    | 3819.00 | 3.80  |

|          |     |                                          |          |           |         |      |
|----------|-----|------------------------------------------|----------|-----------|---------|------|
| 50054.00 | J10 | M-032215- fibronectin type III domain c  | 22862.00 | FNDC3A    | 5345.00 | 7.63 |
| 50054.00 | J11 | M-012366- UDP-N-acetyl-alpha-D-galact    | 11226.00 | GALNT6    | 2777.00 | 4.47 |
| 50054.00 | J12 | M-021339- carbohydrate (chondroitin) s   | 22856.00 | CHSY1     | 1749.00 | 6.00 |
| 50054.00 | J13 | M-014197- UDP-N-acetyl-alpha-D-galact    | 11227.00 | GALNT5    | 3797.00 | 4.66 |
| 50054.00 | J14 | M-020443- netrin G1                      | 22854.00 | NTNG1     | 3007.00 | 4.19 |
| 50054.00 | J15 | M-016509- Ras association (RalGDS/AF-    | 11228.00 | RASSF8    | 2297.00 | 3.09 |
| 50054.00 | J16 | M-020450- ankyrin repeat domain 26       | 22852.00 | ANKRD26   | 3130.00 | 3.99 |
| 50054.00 | J17 | M-019671- PRA1 domain family, membe      | 11230.00 | PRAF2     | 2340.00 | 4.40 |
| 50054.00 | J18 | M-020456- zinc finger protein 508        | 22850.00 | ZNF508    | 2888.00 | 2.08 |
| 50054.00 | J19 | M-004886- SEC63 homolog (S. cerevisia    | 11231.00 | SEC63     | 2849.00 | 4.67 |
| 50054.00 | J20 | M-020458- cytoplasmic polyadenylation    | 22849.00 | CPEB3     | 2623.00 | 2.55 |
| 50054.00 | J21 | M-019659- polymerase (DNA directed),     | 11232.00 | POLG2     | 3523.00 | 5.39 |
| 50054.00 | J23 | M-017465- Hermansky-Pudlak syndrom       | 11234.00 | HPS5      | 3285.00 | 6.61 |
| 50054.00 | K02 | M-019832- inner membrane protein, mi     | 10989.00 | IMMT      | 4420.00 | 4.52 |
| 50054.00 | K04 | M-005943- methionyl aminopeptidase 2     | 10988.00 | METAP2    | 4007.00 | 2.37 |
| 50054.00 | K05 | M-015322- heparanase                     | 10855.00 | HPSE      | 3770.00 | 5.23 |
| 50054.00 | K06 | M-027130- GCN1 general control of ami    | 10985.00 | GCN1L1    | 3004.00 | 1.86 |
| 50054.00 | K07 | M-009292- cytochrome P450, family 46,    | 10858.00 | CYP46A1   | 4386.00 | 2.23 |
| 50054.00 | K08 | M-017017- COP9 constitutive photomor     | 10980.00 | COPS6     | 3512.00 | 2.76 |
| 50054.00 | K09 | M-007488- solute carrier family 26 (sulf | 10861.00 | SLC26A1   | 5392.00 | 2.52 |
| 50054.00 | K10 | M-019895- CLP1, cleavage and polyader    | 10978.00 | CLP1      | 3196.00 | 2.63 |
| 50054.00 | K11 | M-007458- solute carrier family 22 (orga | 10864.00 | SLC22A7   | 2185.00 | 3.25 |
| 50054.00 | K12 | M-012306- chromosome 10 open readir      | 10974.00 | C10orf116 | 2761.00 | 6.05 |
| 50054.00 | K13 | M-022856- AT rich interactive domain 5   | 10865.00 | ARID5A    | 3319.00 | 2.65 |
| 50054.00 | K14 | M-012757- activating signal cointegrato  | 10973.00 | ASCC3     | 4040.00 | 4.78 |
| 50054.00 | K15 | M-020059- HLA complex P5                 | 10866.00 | HCP5      | 2063.00 | 1.55 |
| 50054.00 | K16 | M-012755- cytoskeleton-associated pro    | 10970.00 | CKAP4     | 1811.00 | 1.66 |
| 50054.00 | K17 | M-012293- tetraspanin 9                  | 10867.00 | TSPAN9    | 3285.00 | 1.89 |
| 50054.00 | K18 | M-019834- EBNA1 binding protein 2        | 10969.00 | EBNA1BP2  | 1948.00 | 1.85 |
| 50054.00 | K19 | M-008499- malic enzyme 3, NADP(+)-de     | 10873.00 | ME3       | 3531.00 | 1.44 |
| 50054.00 | K20 | M-009938- acyl-CoA thioesterase 2        | 10965.00 | ACOT2     | 3559.00 | 2.56 |
| 50054.00 | K21 | M-007905- fibrinogen-like 2              | 10875.00 | FGL2      | 3253.00 | 2.12 |
| 50054.00 | K23 | M-012287- family with sequence similar   | 10876.00 | FAM12A    | 3065.00 | 1.31 |
| 50054.00 | L02 | M-006948- zinc finger protein 507        | 22847.00 | ZNF507    | 3018.00 | 2.09 |
| 50054.00 | L04 | M-020466- vasohibin 1                    | 22846.00 | VASH1     | 2726.00 | 2.16 |
| 50054.00 | L05 | M-006943- ring finger protein 24         | 11237.00 | RNF24     | 3788.00 | 2.48 |
| 50054.00 | L06 | M-006317- dolichol kinase                | 22845.00 | DOLK      | 2213.00 | 1.76 |
| 50054.00 | L07 | M-008829- carbonic anhydrase VB, mitc    | 11238.00 | CA5B      | 2486.00 | 1.73 |
| 50054.00 | L08 | M-020471- FERM and PDZ domain conta      | 22844.00 | FRMPD1    | 1694.00 | 0.41 |
| 50054.00 | L09 | M-019485- peptidyl arginine deiminase,   | 11240.00 | PADI2     | 3403.00 | 2.32 |
| 50054.00 | L10 | M-020474- RAB11 family interacting prc   | 22841.00 | RAB11FIP2 | 2270.00 | 2.20 |
| 50054.00 | L11 | M-019662- polyamine-modulated factor     | 11243.00 | PMF1      | 2500.00 | 2.88 |
| 50054.00 | L12 | M-009452- discs, large (Drosophila) hor  | 22839.00 | DLGAP4    | 2142.00 | 1.91 |
| 50054.00 | L13 | M-026967- neurexophilin 4                | 11247.00 | NXPH4     | 2723.00 | 3.16 |
| 50054.00 | L14 | M-006947- ring finger protein 44         | 22838.00 | RNF44     | 3837.00 | 5.08 |
| 50054.00 | L15 | M-012780- neurexophilin 3                | 11248.00 | NXPH3     | 2416.00 | 1.03 |
| 50054.00 | L16 | M-020477- COBL-like 1                    | 22837.00 | COBLL1    | 2738.00 | 2.92 |

|              |                                         |                   |         |       |
|--------------|-----------------------------------------|-------------------|---------|-------|
| 50054.00 L17 | M-027941- neurexophilin 2               | 11249.00 NXPH2    | 1452.00 | 0.83  |
| 50054.00 L18 | M-020486- zinc finger protein 652       | 22834.00 ZNF652   | 5014.00 | 4.59  |
| 50054.00 L19 | M-019666- protein kinase C and casein I | 11252.00 PACSIN2  | 3718.00 | 3.36  |
| 50054.00 L20 | M-020488- KIAA1009                      | 22832.00 KIAA1009 | 4016.00 | 7.59  |
| 50054.00 L21 | M-019670- mannosidase, alpha, class 1E  | 11253.00 MAN1B1   | 3509.00 | 1.94  |
| 50054.00 L23 | M-007601- solute carrier family 6 (amin | 11254.00 SLC6A14  | 2863.00 | 5.03  |
| 50054.00 M02 | M-004599- interferon-induced protein 4  | 10964.00 IFI44L   | 1779.00 | 1.41  |
| 50054.00 M04 | M-012312- endoplasmic reticulum prote   | 10961.00 ERP29    | 4091.00 | 5.74  |
| 50054.00 M05 | M-020170- complement factor H-relate    | 10877.00 CFHR4    | 2240.00 | 2.41  |
| 50054.00 M06 | M-019905- lectin, mannose-binding 2     | 10960.00 LMAN2    | 4231.00 | 5.58  |
| 50054.00 M07 | M-007906- complement factor H-relate    | 10878.00 CFHR3    | 2692.00 | 1.71  |
| 50054.00 M08 | M-008074- transmembrane emp24 dom       | 10959.00 TMED2    | 3038.00 | 4.11  |
| 50054.00 M09 | M-020063- submaxillary gland androger   | 10879.00 SMR3B    | 2769.00 | 4.19  |
| 50054.00 M10 | M-010811- amplified in osteosarcoma     | 10956.00 OS9      | 2607.00 | 2.80  |
| 50054.00 M11 | M-019440- complement component 1, c     | 10882.00 C1QL1    | 2218.00 | 4.24  |
| 50054.00 M12 | M-016439- translocase of outer mitoch   | 10953.00 TOMM34   | 3261.00 | 3.07  |
| 50054.00 M13 | M-020129- extracellular link domain cor | 10894.00 XLKD1    | 2840.00 | 2.04  |
| 50054.00 M14 | M-021504- Sec61 beta subunit            | 10952.00 SEC61B   | 2801.00 | 5.46  |
| 50054.00 M15 | M-027310- oculomedin                    | 10896.00 OCLM     | 4624.00 | 6.19  |
| 50054.00 M16 | M-012314- heterogeneous nuclear ribor   | 10949.00 HNRPA0   | 3782.00 | 2.30  |
| 50054.00 M17 | M-020155- Yip1 interacting factor homc  | 10897.00 YIF1A    | 4042.00 | 4.95  |
| 50054.00 M18 | M-017665- START domain containing 3     | 10948.00 STARD3   | 3240.00 | 3.58  |
| 50054.00 M19 | M-012292- cleavage and polyadenylatio   | 10898.00 CPSF4    | 5109.00 | 4.83  |
| 50054.00 M20 | M-012309- adaptor-related protein com   | 10947.00 AP3M2    | 2948.00 | 4.82  |
| 50054.00 M21 | M-010567- jumping translocation break   | 10899.00 JTB      | 3533.00 | 5.24  |
| 50054.00 M23 | M-008576- dehydrogenase/reductase (S    | 10901.00 DHRS4    | 3938.00 | 4.98  |
| 50054.00 N02 | M-020494- zinc finger protein 409       | 22830.00 ZNF409   | 2124.00 | 1.08  |
| 50054.00 N04 | M-008441- neuroligin 4, Y-linked        | 22829.00 NLGN4Y   | 3788.00 | 4.44  |
| 50054.00 N05 | M-021437- calcium binding protein P22   | 11261.00 CHP      | 5091.00 | 5.30  |
| 50054.00 N06 | M-020498- RNA binding motif protein 1   | 22828.00 RBM16    | 4386.00 | 1.94  |
| 50054.00 N07 | M-019074- peroxisomal membrane prot     | 11264.00 PXMP4    | 3221.00 | 2.39  |
| 50054.00 N08 | M-012505- fuse-binding protein-interac  | 22827.00 SIAHBP1  | 1430.00 | 2.94  |
| 50054.00 N09 | M-004695- SNF8, ESCRT-II complex subu   | 11267.00 SNF8     | 2647.00 | 2.64  |
| 50054.00 N10 | M-020627- DnaJ (Hsp40) homolog, subf    | 22826.00 DNAJC8   | 3277.00 | 3.75  |
| 50054.00 N11 | M-013471- DEAD (Asp-Glu-Ala-As) box p   | 11269.00 DDX19B   | 2424.00 | 4.62  |
| 50054.00 N12 | M-012389- pleckstrin homology-like dor  | 22822.00 PHLDA1   | 2939.00 | 1.84  |
| 50054.00 N13 | M-012779- nurim (nuclear envelope me    | 11270.00 NRM      | 1653.00 | 4.17  |
| 50054.00 N14 | M-019138- coatomer protein complex, s   | 22820.00 COPG     | 1220.00 | 7.13  |
| 50054.00 N15 | M-012367- proline rich 4 (lacrimal)     | 11272.00 PRR4     | 2559.00 | 3.87  |
| 50054.00 N16 | M-020293- coatomer protein complex, s   | 22818.00 COPZ1    | 486.00  | 10.29 |
| 50054.00 N17 | M-010931- kelch-like 2, Mayven (Droso   | 11275.00 KLHL2    | 2874.00 | 3.03  |
| 50054.00 N18 | M-017622- 5'-3' exoribonuclease 2       | 22803.00 XRN2     | 2627.00 | 4.80  |
| 50054.00 N19 | M-019645- POU domain, class 6, transcr  | 11281.00 POU6F2   | 2652.00 | 2.68  |
| 50054.00 N20 | M-010706- chloride channel, calcium ac  | 22802.00 CLCA4    | 2459.00 | 4.39  |
| 50054.00 N21 | M-012503- mannosyl (alpha-1,3-)-glyco   | 11282.00 MGAT4B   | 2202.00 | 1.04  |
| 50054.00 N23 | M-009131- cytochrome P450, family 4, s  | 11283.00 CYP4F8   | 3463.00 | 6.35  |
| 50054.00 O02 | M-019136- KDEL (Lys-Asp-Glu-Leu) endc   | 10945.00 KDELR1   | 2900.00 | 3.24  |

|          |     |                                           |          |          |         |       |
|----------|-----|-------------------------------------------|----------|----------|---------|-------|
| 50054.00 | O04 | M-018988- chromosome 11 open readir       | 10944.00 | C11orf58 | 2726.00 | 2.97  |
| 50054.00 | O05 | M-018883- myotubularin related protei     | 10903.00 | MTMR11   | 2649.00 | 6.64  |
| 50054.00 | O06 | M-012319- male-specific lethal 3-like 1 ( | 10943.00 | MSL3L1   | 2120.00 | 2.92  |
| 50054.00 | O07 | M-004097- TRAF-type zinc finger domain    | 10906.00 | TRAFD1   | 3423.00 | 4.03  |
| 50054.00 | O08 | M-003695- protease, serine, 21 (testisin  | 10942.00 | PRSS21   | 1751.00 | 4.68  |
| 50054.00 | O09 | M-008361- thioredoxin-like 4A             | 10907.00 | TXNL4A   | 2846.00 | 3.13  |
| 50054.00 | O10 | M-019786- UDP glucuronosyltransferase     | 10941.00 | UGT2A1   | 2897.00 | 2.73  |
| 50054.00 | O11 | M-010277- patatin-like phospholipase d    | 10908.00 | PNPLA6   | 3126.00 | 2.43  |
| 50054.00 | O12 | M-014148- processing of precursor 1, ril  | 10940.00 | POP1     | 1989.00 | 1.76  |
| 50054.00 | O13 | M-012877- SGT1, suppressor of G2 allel    | 10910.00 | SUGT1    | 1612.00 | 3.35  |
| 50054.00 | O14 | M-019022- EH-domain containing 1          | 10938.00 | EHD1     | 3609.00 | 6.21  |
| 50054.00 | O15 | M-012326- urotensin 2                     | 10911.00 | UTS2     | 3602.00 | 2.11  |
| 50054.00 | O16 | M-006379- mortality factor 4 like 1       | 10933.00 | MORF4L1  | 3156.00 | 2.85  |
| 50054.00 | O17 | M-018882- poly(A) polymerase alpha        | 10914.00 | PAPOLA   | 4565.00 | 6.31  |
| 50054.00 | O18 | M-012323- splicing factor, arginine/seri  | 10929.00 | SFRS2B   | 3821.00 | 4.66  |
| 50054.00 | O19 | M-017284- melanoma antigen family D,      | 10916.00 | MAGED2   | 4977.00 | 4.44  |
| 50054.00 | O20 | M-003630- sphingomyelin phosphodiester    | 10924.00 | SMPDL3A  | 4960.00 | 8.85  |
| 50054.00 | O21 | M-021357- butyrophilin-like 3             | 10917.00 | BTNL3    | 3827.00 | 3.58  |
| 50054.00 | O23 | M-015831- COP9 constitutive photomor      | 10920.00 | COPS8    | 2090.00 | 2.25  |
| 50054.00 | P02 | M-025439- laminin, beta 4                 | 22798.00 | LAMB4    | 2703.00 | 3.00  |
| 50054.00 | P04 | M-019487- component of oligomeric go      | 22796.00 | COG2     | 3188.00 | 6.65  |
| 50054.00 | P05 | M-007442- solute carrier organic anion t  | 11309.00 | SLCO2B1  | 1396.00 | 3.72  |
| 50054.00 | P06 | M-010570- cancer susceptibility candida   | 22794.00 | CASC3    | 2473.00 | 3.36  |
| 50054.00 | P07 | M-013407- vacuolar protein sorting 45 f   | 11311.00 | VPS45    | 1154.00 | 2.25  |
| 50054.00 | P08 | M-021390- synaptopodin                    | 11346.00 | SYNPO    | 1495.00 | 1.07  |
| 50054.00 | P09 | M-012778- CD300a molecule                 | 11314.00 | CD300A   | 3741.00 | 1.92  |
| 50054.00 | P10 | M-006944- ring finger protein 13          | 11342.00 | RNF13    | 3124.00 | 4.77  |
| 50054.00 | P11 | M-017632- coatomer protein complex, s     | 11316.00 | COPE     | 3654.00 | 4.52  |
| 50054.00 | P12 | M-012373- scrapie responsive protein 1    | 11341.00 | SCRG1    | 2742.00 | 2.81  |
| 50054.00 | P13 | M-021485- XPA binding protein 1, GTPa     | 11321.00 | XAB1     | 1089.00 | 2.02  |
| 50054.00 | P14 | M-012782- exosome component 8             | 11340.00 | EXOSC8   | 1201.00 | 1.75  |
| 50054.00 | P15 | M-012393- DEAD (Asp-Glu-Ala-Asp) box      | 11325.00 | DDX42    | 2142.00 | 5.04  |
| 50054.00 | P16 | M-012783- Opa interacting protein 5       | 11339.00 | OIP5     | 2750.00 | 2.55  |
| 50054.00 | P17 | M-012788- V-set and immunoglobulin d      | 11326.00 | VSIG4    | 2735.00 | 2.78  |
| 50054.00 | P18 | M-012380- U2 small nuclear RNA auxilia    | 11338.00 | U2AF2    | 1260.00 | 1.51  |
| 50054.00 | P19 | M-010034- FK506 binding protein 9, 63     | 11328.00 | FKBP9    | 3447.00 | 1.48  |
| 50054.00 | P20 | M-019010- exocyst complex component       | 11336.00 | EXOC3    | 1914.00 | 1.36  |
| 50054.00 | P21 | M-005833- chymotrypsin C (caldecrin)      | 11330.00 | CTRC     | 2637.00 | 1.93  |
| 50054.00 | P23 | M-006478- tumor suppressor candidate      | 11334.00 | TUSC2    | 2447.00 | 1.27  |
|          |     |                                           |          |          | 3195.00 | 3.08  |
|          |     |                                           |          | MAD3     |         |       |
|          |     |                                           |          | MADc     |         |       |
| 50054.00 | C22 |                                           |          |          | 4287.00 | 12.20 |
| 50054.00 | D22 |                                           |          |          | 4133.00 | 15.12 |
| 50054.00 | E22 |                                           |          |          | 3721.00 | 15.10 |
| 50054.00 | F22 |                                           |          |          | 2943.00 | 10.91 |
|          |     |                                           |          | mn       | 3771.00 | 13.33 |

|              |                                             |         |           |         |       |
|--------------|---------------------------------------------|---------|-----------|---------|-------|
|              |                                             |         | sd        | 601.49  | 2.12  |
| 50054.00 G22 |                                             |         |           | 929.00  | 4.63  |
| 50054.00 H22 |                                             |         |           | 1554.00 | 1.09  |
| 50054.00 I22 |                                             |         |           | 1643.00 | 4.87  |
| 50054.00 J22 |                                             | 1864.00 | 7.14      |         |       |
|              |                                             |         | mn        | 1598.50 | 2.98  |
|              |                                             |         | sd        | 62.93   | 2.67  |
|              |                                             |         | 3psSD     |         | 6.36  |
|              |                                             |         | 3ngSD     |         | 8.01  |
|              |                                             |         | SumSD     |         | 14.37 |
|              |                                             |         | DiffMn    |         | 10.35 |
|              |                                             |         | SmovrDiff |         | 1.39  |
|              |                                             |         | 1minus    |         | -0.39 |
| 50054.00 G03 | M-003290- polo-like kinase 1 (Drosophil     | 5347.00 | PLK1 SMAR | 265.00  | 12.45 |
| 50054.00 H03 | M-003290- polo-like kinase 1 (Drosophil     | 5347.00 | PLK1 SMAR | 414.00  | 7.73  |
| 50054.00 I03 | D-001206-: siControl non-targeting siRNA #2 |         |           | 2770.00 | 2.85  |
| 50054.00 J03 | D-001206-: siControl non-targeting siRNA #2 |         |           | 3814.00 | 1.81  |
| 50054.00 K03 | D-001600-( siGLO RISC-free siRNA            |         |           | 5900.00 | 5.51  |
| 50054.00 L03 | D-001600-( siGLO RISC-free siRNA            |         |           | 5136.00 | 4.50  |

| Abs Dev | rZ    | Cell Count | % inf | Abs Dev | rZ    | Cell Count | % inf | Abs Dev |
|---------|-------|------------|-------|---------|-------|------------|-------|---------|
| 0.95    | -0.54 | 3820.00    | 0.65  | 2.26    | -1.19 | 3236.00    | 3.65  | 1.36    |
| 1.53    | -0.88 | 2622.00    | 1.03  | 1.88    | -0.99 | 2321.00    | 2.03  | 0.27    |
| 2.43    | 1.39  | 2054.00    | 2.78  | 0.13    | -0.07 | 2944.00    | 3.26  | 0.97    |
| 2.20    | -1.26 | 2100.00    | 0.76  | 2.15    | -1.13 | 2803.00    | 1.50  | 0.79    |
| 0.38    | -0.22 | 2855.00    | 2.07  | 0.84    | -0.44 | 3055.00    | 3.44  | 1.15    |
| 1.84    | -1.06 | 2687.00    | 1.90  | 1.01    | -0.53 | 3309.00    | 2.54  | 0.25    |
| 0.56    | -0.32 | 2793.00    | 0.90  | 2.01    | -1.06 | 2386.00    | 0.84  | 1.45    |
| 1.42    | -0.81 | 2204.00    | 1.41  | 1.50    | -0.79 | 1901.00    | 1.10  | 1.19    |
| 1.92    | 1.09  | 1525.00    | 1.31  | 1.60    | -0.84 | 2030.00    | 3.15  | 0.86    |
| 0.39    | -0.23 | 2081.00    | 1.73  | 1.18    | -0.62 | 2890.00    | 1.90  | 0.39    |
| 2.55    | 1.46  | 1108.00    | 1.99  | 0.92    | -0.49 | 1299.00    | 3.46  | 1.17    |
| 2.97    | 1.69  | 2327.00    | 1.46  | 1.45    | -0.76 | 2794.00    | 1.40  | 0.89    |
| 0.61    | -0.35 | 1629.00    | 0.74  | 2.17    | -1.14 | 2609.00    | 1.95  | 0.34    |
| 0.47    | 0.26  | 3281.00    | 2.22  | 0.69    | -0.36 | 4077.00    | 1.79  | 0.50    |
| 0.13    | 0.07  | 1237.00    | 0.65  | 2.26    | -1.19 | 962.00     | 5.20  | 2.91    |
| 3.77    | 2.16  | 2848.00    | 3.37  | 0.46    | 0.24  | 3108.00    | 6.21  | 3.92    |
| 4.41    | 2.52  | 1776.00    | 4.22  | 1.31    | 0.69  | 2068.00    | 7.06  | 4.77    |
| 1.50    | 0.86  | 1662.00    | 4.33  | 1.42    | 0.75  | 3093.00    | 1.97  | 0.32    |
| 2.24    | 1.28  | 1741.00    | 3.91  | 1.00    | 0.52  | 3602.00    | 1.67  | 0.62    |
| 1.01    | 0.57  | 1621.00    | 2.78  | 0.13    | -0.07 | 2557.00    | 5.24  | 2.95    |
| 0.56    | -0.32 | 4719.00    | 2.03  | 0.88    | -0.46 | 4698.00    | 3.94  | 1.65    |
| 1.51    | -0.86 | 4408.00    | 0.23  | 2.68    | -1.41 | 3874.00    | 1.11  | 1.18    |
| 0.01    | 0.00  | 3804.00    | 0.13  | 2.78    | -1.46 | 3926.00    | 1.20  | 1.09    |
| 0.26    | -0.15 | 1625.00    | 0.49  | 2.42    | -1.27 | 1384.00    | 4.70  | 2.41    |
| 1.59    | -0.91 | 4294.00    | 0.63  | 2.28    | -1.20 | 3806.00    | 1.39  | 0.90    |
| 3.96    | 2.26  | 4586.00    | 1.79  | 1.12    | -0.59 | 5261.00    | 6.54  | 4.25    |
| 1.42    | -0.81 | 2882.00    | 0.24  | 2.67    | -1.40 | 4703.00    | 4.72  | 2.43    |
| 1.33    | -0.76 | 2885.00    | 0.49  | 2.42    | -1.28 | 5280.00    | 4.00  | 1.71    |
| 0.18    | 0.10  | 2858.00    | 0.35  | 2.56    | -1.35 | 3270.00    | 2.72  | 0.43    |
| 2.40    | -1.38 | 2359.00    | 0.47  | 2.44    | -1.29 | 2508.00    | 1.52  | 0.77    |
| 2.29    | -1.31 | 2761.00    | 0.11  | 2.80    | -1.47 | 3425.00    | 1.69  | 0.60    |
| 1.05    | -0.60 | 3049.00    | 0.62  | 2.29    | -1.20 | 4267.00    | 1.87  | 0.42    |
| 1.23    | -0.71 | 2698.00    | 0.78  | 2.13    | -1.12 | 4356.00    | 2.66  | 0.37    |
| 2.06    | -1.18 | 3910.00    | 0.64  | 2.27    | -1.19 | 5436.00    | 1.82  | 0.47    |
| 1.16    | -0.67 | 1740.00    | 0.34  | 2.57    | -1.35 | 2397.00    | 2.09  | 0.20    |
| 1.17    | 0.67  | 4798.00    | 1.35  | 1.56    | -0.82 | 5556.00    | 4.07  | 1.78    |
| 0.72    | -0.41 | 4905.00    | 2.47  | 0.44    | -0.23 | 3189.00    | 1.16  | 1.13    |
| 0.00    | 0.00  | 3126.00    | 7.61  | 4.70    | 2.47  | 2958.00    | 4.73  | 2.44    |
| 1.26    | -0.72 | 2648.00    | 0.49  | 2.42    | -1.27 | 2359.00    | 1.65  | 0.64    |
| 0.21    | -0.12 | 1921.00    | 2.92  | 0.01    | 0.00  | 1521.00    | 2.17  | 0.12    |
| 0.67    | -0.39 | 5116.00    | 0.49  | 2.42    | -1.27 | 4535.00    | 6.79  | 4.50    |
| 0.22    | 0.13  | 2436.00    | 0.57  | 2.34    | -1.23 | 2581.00    | 1.55  | 0.74    |
| 2.58    | 1.47  | 4007.00    | 1.07  | 1.84    | -0.97 | 3032.00    | 2.47  | 0.18    |
| 2.28    | 1.30  | 3293.00    | 0.79  | 2.12    | -1.12 | 3321.00    | 1.66  | 0.63    |
| 2.35    | 1.34  | 4137.00    | 0.10  | 2.81    | -1.48 | 4344.00    | 2.90  | 0.61    |
| 2.04    | 1.17  | 2424.00    | 0.58  | 2.33    | -1.23 | 3202.00    | 1.25  | 1.04    |

|      |       |         |       |      |       |         |      |      |
|------|-------|---------|-------|------|-------|---------|------|------|
| 0.99 | 0.56  | 5286.00 | 2.06  | 0.85 | -0.45 | 6051.00 | 2.30 | 0.01 |
| 1.41 | 0.80  | 2996.00 | 1.74  | 1.17 | -0.62 | 4401.00 | 1.59 | 0.70 |
| 1.10 | 0.63  | 3025.00 | 2.08  | 0.83 | -0.44 | 4793.00 | 1.82 | 0.47 |
| 0.30 | -0.17 | 2927.00 | 0.85  | 2.06 | -1.08 | 2857.00 | 2.17 | 0.12 |
| 2.61 | 1.49  | 1990.00 | 3.92  | 1.01 | 0.53  | 2305.00 | 3.77 | 1.48 |
| 3.79 | 2.17  | 2402.00 | 4.75  | 1.84 | 0.96  | 3415.00 | 2.08 | 0.21 |
| 6.47 | 3.70  | 3394.00 | 4.66  | 1.75 | 0.92  | 4863.00 | 5.20 | 2.91 |
| 1.91 | 1.09  | 4157.00 | 4.33  | 1.42 | 0.74  | 4783.00 | 0.98 | 1.31 |
| 1.25 | -0.72 | 3517.00 | 2.16  | 0.75 | -0.39 | 3707.00 | 4.10 | 1.81 |
| 0.41 | 0.23  | 2324.00 | 3.44  | 0.53 | 0.28  | 1603.00 | 2.31 | 0.02 |
| 0.82 | -0.47 | 2107.00 | 5.03  | 2.12 | 1.11  | 2778.00 | 3.49 | 1.20 |
| 0.32 | -0.19 | 5255.00 | 3.62  | 0.71 | 0.37  | 5262.00 | 1.50 | 0.79 |
| 0.13 | 0.07  | 3143.00 | 6.46  | 3.55 | 1.86  | 4388.00 | 3.33 | 1.04 |
| 1.48 | -0.85 | 3519.00 | 3.50  | 0.59 | 0.31  | 3586.00 | 0.78 | 1.51 |
| 2.16 | -1.24 | 5275.00 | 1.52  | 1.39 | -0.73 | 4560.00 | 1.03 | 1.26 |
| 1.02 | 0.58  | 4418.00 | 1.86  | 1.05 | -0.56 | 4071.00 | 1.92 | 0.37 |
| 0.63 | -0.36 | 4005.00 | 4.12  | 1.21 | 0.63  | 4308.00 | 3.44 | 1.15 |
| 1.59 | 0.91  | 3924.00 | 5.99  | 3.08 | 1.62  | 4814.00 | 3.57 | 1.28 |
| 0.01 | -0.01 | 2395.00 | 2.17  | 0.74 | -0.39 | 3315.00 | 1.12 | 1.17 |
| 0.55 | 0.31  | 3598.00 | 3.22  | 0.31 | 0.16  | 4621.00 | 1.88 | 0.41 |
| 0.77 | 0.44  | 2446.00 | 3.64  | 0.73 | 0.38  | 3423.00 | 1.55 | 0.74 |
| 0.76 | 0.43  | 3280.00 | 3.38  | 0.47 | 0.25  | 4196.00 | 1.60 | 0.69 |
| 5.46 | 3.12  | 3014.00 | 4.94  | 2.03 | 1.07  | 3859.00 | 2.00 | 0.29 |
| 2.01 | 1.15  | 2315.00 | 8.29  | 5.38 | 2.83  | 2473.00 | 2.22 | 0.07 |
| 1.95 | 1.11  | 1977.00 | 3.39  | 0.48 | 0.25  | 2858.00 | 3.36 | 1.07 |
| 0.95 | -0.55 | 1558.00 | 2.89  | 0.02 | -0.01 | 1470.00 | 2.65 | 0.36 |
| 0.34 | 0.19  | 3180.00 | 1.38  | 1.53 | -0.80 | 3642.00 | 0.93 | 1.36 |
| 0.25 | 0.14  | 3245.00 | 5.30  | 2.39 | 1.26  | 3501.00 | 1.40 | 0.89 |
| 0.53 | -0.30 | 3977.00 | 1.43  | 1.48 | -0.78 | 3389.00 | 2.30 | 0.01 |
| 1.32 | 0.75  | 3893.00 | 5.06  | 2.15 | 1.13  | 4768.00 | 0.94 | 1.35 |
| 0.66 | -0.38 | 3679.00 | 3.56  | 0.65 | 0.34  | 3911.00 | 8.08 | 5.79 |
| 5.54 | 3.17  | 2694.00 | 5.23  | 2.32 | 1.22  | 2689.00 | 2.19 | 0.10 |
| 4.74 | 2.71  | 5336.00 | 2.98  | 0.07 | 0.04  | 3273.00 | 2.26 | 0.03 |
| 1.89 | -1.08 | 3433.00 | 2.74  | 0.17 | -0.09 | 2016.00 | 1.98 | 0.31 |
| 0.73 | -0.42 | 2532.00 | 2.92  | 0.01 | 0.01  | 4176.00 | 3.57 | 1.28 |
| 5.17 | 2.95  | 4248.00 | 11.77 | 8.86 | 4.65  | 3574.00 | 3.97 | 1.68 |
| 0.28 | -0.16 | 3251.00 | 4.06  | 1.15 | 0.60  | 4834.00 | 3.23 | 0.94 |
| 1.93 | 1.10  | 3192.00 | 1.47  | 1.44 | -0.76 | 4427.00 | 3.73 | 1.44 |
| 1.60 | 0.91  | 2191.00 | 3.70  | 0.79 | 0.41  | 3288.00 | 1.03 | 1.26 |
| 0.07 | -0.04 | 2140.00 | 7.24  | 4.33 | 2.28  | 3745.00 | 0.40 | 1.89 |
| 1.69 | 0.97  | 2577.00 | 2.68  | 0.23 | -0.12 | 4903.00 | 5.67 | 3.38 |
| 0.75 | -0.43 | 3114.00 | 3.34  | 0.43 | 0.22  | 4666.00 | 1.35 | 0.94 |
| 2.06 | 1.18  | 3408.00 | 1.20  | 1.71 | -0.90 | 4551.00 | 2.31 | 0.02 |
| 2.01 | 1.15  | 1338.00 | 2.77  | 0.14 | -0.08 | 2345.00 | 1.58 | 0.71 |
| 2.29 | 1.31  | 3289.00 | 1.79  | 1.12 | -0.59 | 4457.00 | 1.82 | 0.47 |
| 0.92 | -0.53 | 1610.00 | 0.81  | 2.10 | -1.11 | 2759.00 | 0.87 | 1.42 |
| 0.46 | -0.27 | 2438.00 | 2.17  | 0.74 | -0.39 | 4015.00 | 2.04 | 0.25 |

|             |             |                |             |             |             |                |             |             |
|-------------|-------------|----------------|-------------|-------------|-------------|----------------|-------------|-------------|
| 0.99        | 0.56        | 1652.00        | 1.03        | 1.88        | -0.99       | 2626.00        | 0.38        | 1.91        |
| 0.38        | -0.22       | 2155.00        | 1.58        | 1.33        | -0.70       | 2251.00        | 0.76        | 1.53        |
| 0.14        | 0.08        | 2880.00        | 5.07        | 2.16        | 1.13        | 3355.00        | 1.76        | 0.53        |
| 1.30        | -0.75       | 3712.00        | 1.48        | 1.43        | -0.75       | 3040.00        | 0.72        | 1.57        |
| 1.55        | -0.89       | 2861.00        | 0.42        | 2.49        | -1.31       | 3193.00        | 2.85        | 0.56        |
| 1.56        | -0.89       | 3762.00        | 2.45        | 0.46        | -0.25       | 4929.00        | 2.68        | 0.39        |
| 2.53        | -1.45       | 3999.00        | 1.80        | 1.11        | -0.58       | 2880.00        | 1.63        | 0.66        |
| 0.00        | 0.00        | 3286.00        | 1.55        | 1.36        | -0.71       | 2939.00        | 2.62        | 0.33        |
| 1.11        | -0.64       | 5301.00        | 3.47        | 0.56        | 0.29        | 4190.00        | 1.43        | 0.86        |
| 0.69        | -0.40       | 1615.00        | 2.17        | 0.74        | -0.39       | 2259.00        | 1.42        | 0.87        |
| 2.13        | -1.22       | 2106.00        | 5.79        | 2.88        | 1.51        | 2100.00        | 2.19        | 0.10        |
| 0.70        | 0.40        | 4201.00        | 4.78        | 1.87        | 0.98        | 4852.00        | 4.29        | 2.00        |
| 2.36        | -1.35       | 618.00         | 5.83        | 2.92        | 1.53        | 816.00         | 4.04        | 1.75        |
| <b>6.77</b> | <b>3.87</b> | <b>3202.00</b> | <b>9.21</b> | <b>6.30</b> | <b>3.31</b> | <b>2907.00</b> | <b>4.20</b> | <b>1.91</b> |
| 1.04        | -0.60       | 2688.00        | 1.93        | 0.98        | -0.51       | 4261.00        | 1.71        | 0.58        |
| 1.41        | 0.80        | 3593.00        | 4.43        | 1.52        | 0.80        | 3125.00        | 1.22        | 1.07        |
| 0.51        | -0.29       | 2549.00        | 4.90        | 1.99        | 1.05        | 3660.00        | 1.34        | 0.95        |
| 2.70        | -1.55       | 3368.00        | 8.91        | 6.00        | <b>3.15</b> | 3101.00        | 1.32        | 0.97        |
| 0.08        | 0.04        | 3478.00        | 4.14        | 1.23        | 0.65        | 3811.00        | 2.20        | 0.09        |
| 0.70        | 0.40        | 2980.00        | 5.40        | 2.49        | 1.31        | 4028.00        | 2.51        | 0.22        |
| 0.82        | -0.47       | 1387.00        | 2.52        | 0.39        | -0.20       | 1982.00        | 4.14        | 1.85        |
| 0.96        | 0.55        | 1661.00        | 5.06        | 2.15        | 1.13        | 1809.00        | 1.22        | 1.07        |
| 2.89        | 1.65        | 2563.00        | 3.75        | 0.84        | 0.44        | 2883.00        | 2.43        | 0.14        |
| 1.69        | -0.97       | 2067.00        | 4.02        | 1.11        | 0.58        | 2565.00        | 0.78        | 1.51        |
| 0.32        | 0.18        | 1929.00        | 2.80        | 0.11        | -0.06       | 2930.00        | 1.43        | 0.86        |
| 2.58        | -1.48       | 4065.00        | 3.84        | 0.93        | 0.49        | 5741.00        | 1.31        | 0.98        |
| 0.16        | 0.09        | 4520.00        | 3.65        | 0.74        | 0.39        | 3451.00        | 0.58        | 1.71        |
| 1.31        | 0.75        | 6102.00        | 1.79        | 1.12        | -0.59       | 5864.00        | 0.55        | 1.74        |
| 0.01        | -0.01       | 2860.00        | 2.03        | 0.88        | -0.46       | 2968.00        | 1.38        | 0.91        |
| <b>4.20</b> | <b>2.40</b> | <b>4255.00</b> | <b>7.85</b> | <b>4.94</b> | <b>2.59</b> | <b>5583.00</b> | <b>4.14</b> | <b>1.85</b> |
| <b>4.70</b> | <b>2.69</b> | 3873.00        | 4.85        | 1.94        | 1.02        | 3728.00        | 4.77        | 2.48        |
| 0.32        | -0.19       | 3903.00        | 2.49        | 0.42        | -0.22       | 4053.00        | 1.92        | 0.37        |
| <b>1.49</b> | <b>0.85</b> | <b>2209.00</b> | <b>9.33</b> | <b>6.42</b> | <b>3.37</b> | <b>3737.00</b> | <b>8.16</b> | <b>5.87</b> |
| 2.84        | 1.62        | 3641.00        | 6.59        | 3.68        | 1.93        | 3919.00        | 4.06        | 1.77        |
| 0.88        | 0.50        | 4121.00        | 3.23        | 0.32        | 0.17        | 4426.00        | 2.44        | 0.15        |
| 2.16        | -1.24       | 2158.00        | 2.13        | 0.78        | -0.41       | 2318.00        | 1.98        | 0.31        |
| 2.61        | 1.49        | 2704.00        | 9.17        | 6.26        | <b>3.29</b> | 2723.00        | 4.99        | 2.70        |
| 2.05        | -1.17       | 1847.00        | 8.28        | 5.37        | <b>2.82</b> | 2102.00        | 2.43        | 0.14        |
| 0.92        | -0.53       | 3063.00        | 4.67        | 1.76        | 0.92        | 3480.00        | 2.50        | 0.21        |
| 0.70        | 0.40        | 4348.00        | 3.43        | 0.52        | 0.27        | 3433.00        | 0.84        | 1.45        |
| 1.06        | -0.61       | 3770.00        | 2.71        | 0.20        | -0.11       | 3337.00        | 1.44        | 0.85        |
| 0.14        | -0.08       | 1788.00        | 3.19        | 0.28        | 0.14        | 1783.00        | 2.97        | 0.68        |
| 1.79        | 1.02        | 3949.00        | 2.61        | 0.30        | -0.16       | 3607.00        | 2.86        | 0.57        |
| <b>3.74</b> | <b>2.14</b> | 3098.00        | 6.75        | 3.84        | <b>2.01</b> | 2667.00        | 3.86        | 1.57        |
| 0.36        | 0.20        | 3994.00        | 2.85        | 0.06        | -0.03       | 2596.00        | 2.74        | 0.45        |
| <b>4.67</b> | <b>2.67</b> | 3119.00        | 1.44        | 1.47        | -0.77       | 1935.00        | 2.95        | 0.66        |
| 1.08        | -0.62       | 4376.00        | 3.34        | 0.43        | 0.22        | 3087.00        | 1.04        | 1.25        |



|      |       |         |       |      |       |         |      |      |
|------|-------|---------|-------|------|-------|---------|------|------|
| 3.42 | 1.95  | 5128.00 | 4.35  | 1.44 | 0.75  | 4579.00 | 3.21 | 0.92 |
| 2.65 | 1.51  | 6441.00 | 4.32  | 1.41 | 0.74  | 5674.00 | 6.01 | 3.72 |
| 0.39 | 0.22  | 3614.00 | 4.87  | 1.96 | 1.03  | 3591.00 | 2.70 | 0.41 |
| 2.58 | -1.48 | 2828.00 | 5.34  | 2.43 | 1.28  | 2058.00 | 2.19 | 0.10 |
| 1.39 | -0.80 | 2352.00 | 2.00  | 0.91 | -0.48 | 2219.00 | 0.99 | 1.30 |
| 1.31 | -0.75 | 2673.00 | 4.56  | 1.65 | 0.87  | 3364.00 | 1.69 | 0.60 |
| 0.65 | 0.37  | 3390.00 | 4.34  | 1.43 | 0.75  | 3955.00 | 4.85 | 2.56 |
| 2.51 | 1.43  | 4277.00 | 7.25  | 4.34 | 2.28  | 4575.00 | 3.83 | 1.54 |
| 0.69 | 0.39  | 2889.00 | 4.33  | 1.42 | 0.74  | 2338.00 | 3.59 | 1.30 |
| 0.23 | -0.13 | 4099.00 | 5.17  | 2.26 | 1.19  | 4757.00 | 3.26 | 0.97 |
| 1.46 | -0.84 | 3139.00 | 5.38  | 2.47 | 1.30  | 2202.00 | 1.54 | 0.75 |
| 0.67 | 0.38  | 4277.00 | 6.59  | 3.68 | 1.93  | 3721.00 | 2.15 | 0.14 |
| 1.83 | -1.05 | 4569.00 | 2.39  | 0.52 | -0.28 | 3038.00 | 1.32 | 0.97 |
| 0.78 | -0.45 | 1738.00 | 2.24  | 0.67 | -0.35 | 1084.00 | 2.31 | 0.02 |
| 0.49 | -0.28 | 3126.00 | 1.44  | 1.47 | -0.77 | 1932.00 | 2.38 | 0.09 |
| 0.87 | 0.50  | 2696.00 | 3.12  | 0.21 | 0.11  | 2750.00 | 2.29 | 0.00 |
| 0.21 | -0.12 | 3938.00 | 2.72  | 0.19 | -0.10 | 3256.00 | 2.58 | 0.29 |
| 0.30 | 0.17  | 2860.00 | 1.08  | 1.83 | -0.96 | 2707.00 | 1.00 | 1.29 |
| 4.69 | 2.68  | 3921.00 | 4.54  | 1.63 | 0.86  | 3669.00 | 2.62 | 0.33 |
| 0.45 | -0.26 | 4259.00 | 2.49  | 0.42 | -0.22 | 3419.00 | 2.87 | 0.58 |
| 1.24 | 0.71  | 2545.00 | 4.13  | 1.22 | 0.64  | 1632.00 | 1.29 | 1.00 |
| 0.45 | -0.26 | 2734.00 | 0.51  | 2.40 | -1.26 | 2224.00 | 0.58 | 1.71 |
| 7.10 | 4.06  | 3539.00 | 5.85  | 2.94 | 1.54  | 3184.00 | 1.29 | 1.00 |
| 0.80 | -0.46 | 3696.00 | 3.06  | 0.15 | 0.08  | 3701.00 | 2.03 | 0.26 |
| 0.93 | 0.53  | 3305.00 | 2.06  | 0.85 | -0.45 | 3192.00 | 1.32 | 0.97 |
| 0.73 | 0.41  | 2584.00 | 2.13  | 0.78 | -0.41 | 3674.00 | 2.69 | 0.40 |
| 1.34 | 0.76  | 2508.00 | 1.87  | 1.04 | -0.55 | 4180.00 | 2.56 | 0.27 |
| 0.43 | -0.25 | 1999.00 | 3.25  | 0.34 | 0.18  | 2998.00 | 3.60 | 1.31 |
| 0.03 | -0.02 | 3381.00 | 5.68  | 2.77 | 1.45  | 5025.00 | 4.08 | 1.79 |
| 2.65 | 1.52  | 1908.00 | 1.62  | 1.29 | -0.68 | 3344.00 | 1.17 | 1.12 |
| 0.27 | 0.15  | 2356.00 | 5.69  | 2.78 | 1.46  | 3171.00 | 1.45 | 0.84 |
| 0.66 | -0.38 | 2187.00 | 4.89  | 1.98 | 1.04  | 2621.00 | 4.85 | 2.56 |
| 2.15 | -1.23 | 2665.00 | 2.66  | 0.25 | -0.13 | 3037.00 | 1.88 | 0.41 |
| 0.31 | -0.18 | 2530.00 | 3.87  | 0.96 | 0.51  | 1978.00 | 0.91 | 1.38 |
| 0.81 | 0.46  | 3887.00 | 5.25  | 2.34 | 1.23  | 3394.00 | 2.56 | 0.27 |
| 1.68 | 0.96  | 654.00  | 6.42  | 3.51 | 1.84  | 958.00  | 3.55 | 1.26 |
| 2.08 | -1.19 | 3614.00 | 3.10  | 0.19 | 0.10  | 3237.00 | 1.24 | 1.05 |
| 1.47 | -0.84 | 2710.00 | 4.54  | 1.63 | 0.85  | 3107.00 | 0.45 | 1.84 |
| 0.46 | -0.27 | 3254.00 | 4.64  | 1.73 | 0.91  | 1920.00 | 2.19 | 0.10 |
| 1.76 | -1.01 | 3744.00 | 3.47  | 0.56 | 0.29  | 2655.00 | 2.90 | 0.61 |
| 0.16 | -0.09 | 4360.00 | 3.26  | 0.35 | 0.18  | 2901.00 | 4.83 | 2.54 |
| 0.32 | -0.19 | 3514.00 | 2.48  | 0.43 | -0.23 | 3484.00 | 1.52 | 0.77 |
| 1.69 | 0.96  | 3873.00 | 2.81  | 0.10 | -0.05 | 3443.00 | 1.66 | 0.63 |
| 0.01 | 0.00  | 4147.00 | 2.94  | 0.03 | 0.02  | 4518.00 | 2.46 | 0.17 |
| 4.00 | 2.29  | 1047.00 | 10.51 | 7.60 | 3.99  | 1678.00 | 1.67 | 0.62 |
| 0.34 | 0.19  | 2898.00 | 2.38  | 0.53 | -0.28 | 2803.00 | 1.32 | 0.97 |
| 0.72 | 0.41  | 3304.00 | 3.90  | 0.99 | 0.52  | 3966.00 | 2.24 | 0.05 |

|      |       |         |      |      |       |         |      |      |
|------|-------|---------|------|------|-------|---------|------|------|
| 4.55 | 2.60  | 4397.00 | 7.23 | 4.32 | 2.27  | 4126.00 | 5.04 | 2.75 |
| 1.39 | 0.79  | 1474.00 | 3.26 | 0.35 | 0.18  | 1580.00 | 2.59 | 0.30 |
| 2.92 | 1.67  | 1119.00 | 3.22 | 0.31 | 0.16  | 818.00  | 4.89 | 2.60 |
| 1.58 | 0.90  | 2591.00 | 5.94 | 3.03 | 1.59  | 2173.00 | 1.93 | 0.36 |
| 1.11 | 0.63  | 2283.00 | 5.12 | 2.21 | 1.16  | 1514.00 | 1.12 | 1.17 |
| 0.01 | 0.00  | 2120.00 | 2.22 | 0.69 | -0.37 | 1475.00 | 1.63 | 0.66 |
| 0.91 | 0.52  | 2836.00 | 4.20 | 1.29 | 0.67  | 2120.00 | 3.77 | 1.48 |
| 1.32 | 0.75  | 1045.00 | 7.75 | 4.84 | 2.54  | 1148.00 | 8.62 | 6.33 |
| 1.00 | -0.58 | 1812.00 | 3.75 | 0.84 | 0.44  | 952.00  | 5.04 | 2.75 |
| 1.59 | 0.91  | 1925.00 | 2.65 | 0.26 | -0.14 | 2687.00 | 1.08 | 1.21 |
| 0.53 | -0.30 | 2121.00 | 4.48 | 1.57 | 0.82  | 2707.00 | 2.88 | 0.59 |
| 2.31 | 1.32  | 3196.00 | 2.97 | 0.06 | 0.03  | 3484.00 | 3.53 | 1.24 |
| 3.53 | 2.01  | 3496.00 | 4.15 | 1.24 | 0.65  | 2805.00 | 2.42 | 0.13 |
| 1.44 | 0.82  | 5349.00 | 2.34 | 0.57 | -0.30 | 4318.00 | 6.90 | 4.61 |
| 0.71 | -0.41 | 3960.00 | 1.57 | 1.34 | -0.71 | 3588.00 | 6.35 | 4.06 |
| 2.15 | 1.22  | 3251.00 | 2.89 | 0.02 | -0.01 | 3064.00 | 4.60 | 2.31 |
| 1.22 | -0.70 | 2516.00 | 1.83 | 1.08 | -0.57 | 1923.00 | 1.35 | 0.94 |
| 0.85 | -0.49 | 3912.00 | 3.17 | 0.26 | 0.14  | 3731.00 | 4.23 | 1.94 |
| 0.32 | -0.18 | 3853.00 | 0.70 | 2.21 | -1.16 | 3559.00 | 2.64 | 0.35 |
| 0.56 | -0.32 | 3674.00 | 1.25 | 1.66 | -0.87 | 3718.00 | 0.86 | 1.43 |
| 0.45 | -0.26 | 4640.00 | 2.50 | 0.41 | -0.22 | 3402.00 | 1.73 | 0.56 |
| 0.17 | 0.09  | 1603.00 | 1.00 | 1.91 | -1.01 | 1180.00 | 2.20 | 0.09 |
| 2.97 | 1.70  | 2927.00 | 4.07 | 1.16 | 0.61  | 1596.00 | 4.57 | 2.28 |
| 0.43 | -0.25 | 2125.00 | 0.99 | 1.92 | -1.01 | 2483.00 | 2.78 | 0.49 |
| 1.70 | 0.97  | 4707.00 | 2.57 | 0.34 | -0.18 | 3959.00 | 4.17 | 1.88 |
| 1.53 | -0.88 | 2944.00 | 2.89 | 0.02 | -0.01 | 2307.00 | 1.73 | 0.56 |
| 1.42 | -0.82 | 2060.00 | 1.50 | 1.41 | -0.74 | 1237.00 | 2.75 | 0.46 |
| 1.19 | -0.68 | 4240.00 | 0.87 | 2.04 | -1.07 | 2333.00 | 3.81 | 1.52 |
| 1.23 | -0.71 | 2005.00 | 2.19 | 0.72 | -0.38 | 1735.00 | 2.77 | 0.48 |
| 1.64 | -0.94 | 3666.00 | 1.58 | 1.33 | -0.70 | 2958.00 | 2.57 | 0.28 |
| 0.52 | -0.30 | 2458.00 | 0.61 | 2.30 | -1.21 | 1433.00 | 3.91 | 1.62 |
| 0.96 | -0.55 | 5067.00 | 7.70 | 4.79 | 2.51  | 2748.00 | 4.48 | 2.19 |
| 1.77 | -1.02 | 2827.00 | 1.77 | 1.14 | -0.60 | 2795.00 | 0.61 | 1.68 |
| 0.99 | -0.57 | 4691.00 | 3.47 | 0.56 | 0.30  | 4690.00 | 4.69 | 2.40 |
| 0.92 | -0.53 | 3549.00 | 2.73 | 0.18 | -0.09 | 3304.00 | 2.36 | 0.07 |
| 0.60 | -0.34 | 4101.00 | 2.05 | 0.86 | -0.45 | 3752.00 | 3.41 | 1.12 |
| 1.32 | -0.76 | 2860.00 | 1.47 | 1.44 | -0.76 | 2298.00 | 3.09 | 0.80 |
| 1.35 | -0.77 | 3364.00 | 2.02 | 0.89 | -0.47 | 2920.00 | 1.92 | 0.37 |
| 2.67 | -1.53 | 2559.00 | 3.32 | 0.41 | 0.22  | 2396.00 | 2.50 | 0.21 |
| 0.76 | -0.44 | 3418.00 | 2.75 | 0.16 | -0.09 | 3183.00 | 0.88 | 1.41 |
| 0.88 | -0.50 | 2502.00 | 3.16 | 0.25 | 0.13  | 2679.00 | 0.71 | 1.58 |
| 0.20 | -0.12 | 1405.00 | 1.71 | 1.20 | -0.63 | 2893.00 | 0.76 | 1.53 |
| 1.17 | -0.67 | 1394.00 | 1.22 | 1.69 | -0.89 | 1872.00 | 1.87 | 0.42 |
| 0.08 | 0.04  | 2060.00 | 1.26 | 1.65 | -0.87 | 2023.00 | 1.68 | 0.61 |
| 2.00 | 1.14  | 3021.00 | 4.10 | 1.19 | 0.63  | 3413.00 | 4.25 | 1.96 |
| 2.05 | -1.17 | 2554.00 | 1.10 | 1.81 | -0.95 | 2498.00 | 1.28 | 1.01 |
| 0.16 | -0.09 | 2532.00 | 1.70 | 1.21 | -0.64 | 3312.00 | 1.18 | 1.11 |

|      |       |         |       |      |       |         |      |      |
|------|-------|---------|-------|------|-------|---------|------|------|
| 2.25 | -1.29 | 2262.00 | 0.40  | 2.51 | -1.32 | 1275.00 | 0.78 | 1.51 |
| 1.51 | 0.86  | 4755.00 | 0.76  | 2.15 | -1.13 | 4626.00 | 2.53 | 0.24 |
| 0.28 | 0.16  | 5181.00 | 5.23  | 2.32 | 1.22  | 4455.00 | 1.35 | 0.94 |
| 4.51 | 2.58  | 4123.00 | 10.94 | 8.03 | 4.22  | 4087.00 | 4.94 | 2.65 |
| 1.14 | -0.66 | 3838.00 | 3.36  | 0.45 | 0.24  | 3906.00 | 2.84 | 0.55 |
| 1.95 | 1.11  | 3291.00 | 2.10  | 0.81 | -0.43 | 3648.00 | 4.44 | 2.15 |
| 1.67 | -0.96 | 4360.00 | 1.42  | 1.49 | -0.78 | 3767.00 | 1.01 | 1.28 |
| 2.66 | 1.52  | 3828.00 | 1.41  | 1.50 | -0.79 | 5399.00 | 1.94 | 0.35 |
| 0.67 | -0.39 | 3218.00 | 1.34  | 1.57 | -0.83 | 4450.00 | 2.36 | 0.07 |
| 2.50 | 1.43  | 4319.00 | 5.56  | 2.65 | 1.39  | 4329.00 | 2.66 | 0.37 |
| 1.37 | -0.79 | 3576.00 | 2.32  | 0.59 | -0.31 | 3924.00 | 1.89 | 0.40 |
| 1.03 | 0.59  | 3461.00 | 1.47  | 1.44 | -0.76 | 3482.00 | 1.41 | 0.88 |
| 1.11 | 0.63  | 3829.00 | 4.36  | 1.45 | 0.76  | 3628.00 | 1.46 | 0.83 |
| 0.28 | -0.16 | 2628.00 | 0.88  | 2.03 | -1.07 | 2933.00 | 0.65 | 1.64 |
| 1.16 | 0.66  | 2048.00 | 3.91  | 1.00 | 0.52  | 2529.00 | 1.62 | 0.67 |
| 0.01 | -0.01 | 2134.00 | 3.37  | 0.46 | 0.24  | 2399.00 | 1.00 | 1.29 |
| 1.04 | -0.60 | 2183.00 | 4.76  | 1.85 | 0.97  | 2595.00 | 1.12 | 1.17 |
| 2.38 | 1.36  | 2919.00 | 6.34  | 3.43 | 1.80  | 2223.00 | 1.44 | 0.85 |
| 3.11 | 1.77  | 3667.00 | 4.91  | 2.00 | 1.05  | 2864.00 | 1.92 | 0.37 |
| 0.78 | -0.45 | 3577.00 | 1.48  | 1.43 | -0.75 | 2355.00 | 1.36 | 0.93 |
| 1.87 | 1.07  | 3357.00 | 4.92  | 2.01 | 1.05  | 2533.00 | 0.79 | 1.50 |
| 0.50 | 0.28  | 3792.00 | 2.24  | 0.67 | -0.35 | 3670.00 | 2.64 | 0.35 |
| 1.75 | 1.00  | 4947.00 | 2.83  | 0.08 | -0.04 | 3837.00 | 1.46 | 0.83 |
| 1.74 | 0.99  | 1593.00 | 5.34  | 2.43 | 1.27  | 2160.00 | 2.69 | 0.40 |
| 2.16 | 1.23  | 3781.00 | 2.17  | 0.74 | -0.39 | 3577.00 | 2.82 | 0.53 |
| 1.90 | 1.08  | 2936.00 | 3.88  | 0.97 | 0.51  | 2506.00 | 1.20 | 1.09 |
| 2.00 | -1.14 | 2708.00 | 2.55  | 0.36 | -0.19 | 2887.00 | 2.63 | 0.34 |
| 1.36 | 0.77  | 3280.00 | 2.68  | 0.23 | -0.12 | 3570.00 | 4.06 | 1.77 |
| 2.22 | 1.27  | 4036.00 | 4.16  | 1.25 | 0.66  | 4694.00 | 8.61 | 6.32 |
| 1.14 | -0.66 | 4198.00 | 3.81  | 0.90 | 0.47  | 4016.00 | 2.29 | 0.00 |
| 0.69 | -0.40 | 2763.00 | 0.65  | 2.26 | -1.19 | 3376.00 | 1.36 | 0.93 |
| 0.14 | -0.08 | 1714.00 | 1.87  | 1.04 | -0.55 | 1519.00 | 2.17 | 0.12 |
| 0.44 | -0.25 | 2330.00 | 2.06  | 0.85 | -0.45 | 2859.00 | 0.98 | 1.31 |
| 0.67 | 0.38  | 3121.00 | 2.92  | 0.01 | 0.00  | 3372.00 | 5.93 | 3.64 |
| 1.54 | 0.88  | 1302.00 | 2.38  | 0.53 | -0.28 | 1759.00 | 2.62 | 0.33 |
| 1.24 | -0.71 | 1971.00 | 5.28  | 2.37 | 1.24  | 2479.00 | 3.95 | 1.66 |
| 1.09 | 0.62  | 914.00  | 6.13  | 3.22 | 1.69  | 1577.00 | 0.25 | 2.04 |
| 4.05 | 2.31  | 552.00  | 4.89  | 1.98 | 1.04  | 909.00  | 2.86 | 0.57 |
| 0.79 | 0.45  | 2608.00 | 6.21  | 3.30 | 1.73  | 2703.00 | 2.55 | 0.26 |
| 7.21 | 4.12  | 290.00  | 10.00 | 7.09 | 3.72  | 404.00  | 2.48 | 0.19 |
| 0.05 | -0.03 | 1862.00 | 2.79  | 0.12 | -0.06 | 2343.00 | 1.02 | 1.27 |
| 1.72 | 0.98  | 1971.00 | 2.18  | 0.73 | -0.38 | 2827.00 | 1.98 | 0.31 |
| 0.40 | -0.23 | 2659.00 | 1.50  | 1.41 | -0.74 | 3616.00 | 1.80 | 0.49 |
| 1.31 | 0.75  | 2912.00 | 4.70  | 1.79 | 0.94  | 2859.00 | 2.62 | 0.33 |
| 2.04 | -1.17 | 2418.00 | 2.85  | 0.06 | -0.03 | 3012.00 | 0.60 | 1.69 |
| 3.27 | 1.87  | 2099.00 | 6.48  | 3.57 | 1.87  | 3838.00 | 0.39 | 1.90 |
| 0.16 | 0.09  | 3932.00 | 4.12  | 1.21 | 0.63  | 4672.00 | 0.47 | 1.82 |

|             |                |                |             |                |              |                |             |              |
|-------------|----------------|----------------|-------------|----------------|--------------|----------------|-------------|--------------|
| 0.11        | -0.06          | 4537.00        | 4.08        | 1.17           | 0.61         | 3861.00        | 3.89        | 1.60         |
| <b>3.56</b> | <b>2.04</b>    | <b>4202.00</b> | <b>6.54</b> | <b>3.63</b>    | <b>1.91</b>  | <b>3437.00</b> | <b>6.34</b> | <b>4.05</b>  |
| 0.16        | -0.09          | 2337.00        | 2.91        | 0.00           | 0.00         | 2623.00        | 5.76        | <b>3.47</b>  |
| 0.95        | 0.54           | 4838.00        | 4.94        | 2.03           | 1.07         | 4353.00        | 4.32        | 2.03         |
| 1.60        | 0.91           | 3110.00        | 2.22        | 0.69           | -0.36        | 2414.00        | 2.82        | 0.53         |
| 0.05        | 0.02           | 4080.00        | 3.75        | 0.84           | 0.44         | 2930.00        | 4.61        | 2.32         |
| 0.35        | -0.20          | 3554.00        | 2.64        | 0.27           | -0.14        | 3651.00        | 2.44        | 0.15         |
| 0.65        | -0.37          | 3090.00        | 3.04        | 0.13           | 0.07         | 2599.00        | 2.50        | 0.21         |
| 1.32        | -0.76          | 1809.00        | 2.21        | 0.70           | -0.37        | 1698.00        | 1.41        | 0.88         |
| 0.27        | 0.15           | 1377.00        | 3.27        | 0.36           | 0.19         | 1473.00        | 3.53        | 1.24         |
| 3.13        | 1.79           | 2349.00        | 2.94        | 0.03           | 0.01         | 2833.00        | 2.75        | 0.46         |
| 0.97        | -0.56          | 2936.00        | 2.04        | 0.87           | -0.46        | 1944.00        | 2.26        | 0.03         |
| 0.23        | -0.13          | 3589.00        | 1.78        | 1.13           | -0.59        | 3244.00        | 1.91        | 0.38         |
| 3.23        | 1.84           | 1686.00        | 3.20        | 0.29           | 0.15         | 2760.00        | 1.41        | 0.88         |
| 1.58        | 0.90           | 2746.00        | 3.35        | 0.44           | 0.23         | 3041.00        | 1.32        | 0.97         |
| 1.36        | 0.78           | 4182.00        | 2.46        | 0.45           | -0.24        | 4802.00        | 2.98        | 0.69         |
| <b>5.77</b> | <b>3.30</b>    | <b>3986.00</b> | <b>3.21</b> | <b>0.30</b>    | <b>0.16</b>  | <b>4132.00</b> | <b>3.19</b> | <b>0.90</b>  |
| 0.50        | 0.28           | 4164.00        | 2.40        | 0.51           | -0.27        | 3686.00        | 1.11        | 1.18         |
| 0.83        | -0.48          | 3108.00        | 1.48        | 1.43           | -0.75        | 3281.00        | 0.79        | 1.50         |
| 0.08        | -0.05          | 3202.00        | 1.34        | 1.57           | -0.82        | 2121.00        | 3.06        | 0.77         |
| <b>3.57</b> | <b>2.04</b>    | <b>2676.00</b> | <b>4.56</b> | <b>1.65</b>    | <b>0.87</b>  | <b>2234.00</b> | <b>5.46</b> | <b>3.17</b>  |
| 0.64        | 0.37           | 1304.00        | 2.84        | 0.07           | -0.04        | 776.00         | 4.38        | 2.09         |
| 0.28        | 0.16           | 2236.00        | 3.22        | 0.31           | 0.16         | 1464.00        | 3.14        | 0.85         |
| 0.83        | -0.48          | 1175.00        | 2.72        | 0.19           | -0.10        | 851.00         | 8.23        | <b>5.94</b>  |
| 2.01        | -1.15          | 1681.00        | 3.27        | 0.36           | 0.19         | 981.00         | 2.75        | 0.46         |
| 1.16        | -0.66          | 3272.00        | 2.32        | 0.59           | -0.31        | 2283.00        | 1.80        | 0.49         |
| 1.69        | 0.96           | 3091.00        | 8.28        | 5.37           | <b>2.82</b>  | 2605.00        | 2.73        | 0.44         |
| 1.44        | 0.82           | 2135.00        | 2.90        | 0.01           | 0.00         | 1883.00        | 2.76        | 0.47         |
| 0.27        | -0.16          | 2327.00        | 3.09        | 0.18           | 0.10         | 3066.00        | 2.28        | 0.01         |
| 1.06        | -0.61          | 1299.00        | 3.85        | 0.94           | 0.49         | 1411.00        | 4.32        | 2.03         |
| 1.33        | -0.76          | 1543.00        | 4.15        | 1.24           | 0.65         | 2270.00        | 3.48        | 1.19         |
| 1.96        | 1.12           | 1843.00        | 8.68        | 5.77           | <b>3.03</b>  | 2179.00        | 12.48       | <b>10.19</b> |
| 0.53        | -0.31          | 2634.00        | 5.39        | 2.48           | 1.30         | 2975.00        | 2.15        | 0.14         |
| 0.30        | -0.17          | 1705.00        | 6.63        | 3.72           | 1.95         | 2222.00        | 3.15        | 0.86         |
| 1.57        | -0.90          | 1215.00        | 6.83        | 3.92           | <b>2.06</b>  | 1328.00        | 1.96        | 0.33         |
| 1.60        | -0.92          | 2443.00        | 5.77        | 2.86           | 1.50         | 3817.00        | 2.52        | 0.23         |
| 1.72        | -0.99          | 1060.00        | 6.51        | 3.60           | 1.89         | 1381.00        | 3.26        | 0.97         |
| 1.15        | -0.66          | 1942.00        | 3.86        | 0.95           | 0.50         | 2647.00        | 1.85        | 0.44         |
| 1.81        | -1.04          | 973.00         | 5.34        | 2.43           | 1.28         | 1810.00        | 4.20        | 1.91         |
| 1.18        |                | 2927.00        | 2.91        | 1.29           |              | 3065.00        | 2.29        | 0.91         |
| 3.54        |                |                |             | 3.86           |              |                |             | 2.72         |
| 1.75        |                |                |             | 1.90           |              |                |             | 1.34         |
|             |                |                |             | 3477.00        | 15.39        |                | 5182.00     | 25.61        |
|             | 5310.00        | 19.68          |             | 4595.00        | 10.01        |                |             |              |
|             | 4664.00        | 13.17          |             |                |              |                |             |              |
|             | 5098.00        | 18.44          |             | 4290.00        | 13.61        |                |             |              |
|             | <b>5024.00</b> | <b>17.09</b>   |             | <b>4120.67</b> | <b>13.00</b> |                |             |              |

|         |       |         |       |
|---------|-------|---------|-------|
| 329.30  | 3.46  | 577.92  | 2.74  |
| 2586.00 | 1.86  | 1406.00 | 5.05  |
| 2287.00 | 0.61  | 1634.00 | 0.67  |
| 1731.00 | 4.22  | 1177.00 | 1.61  |
| 1700.00 | 1.29  | 1786.00 | 3.19  |
| 1906.00 | 2.04  | 1532.33 | 1.83  |
| 330.32  | 1.92  | 316.97  | 1.27  |
|         | 10.38 |         | 8.22  |
|         | 5.75  |         | 3.82  |
|         | 16.12 |         | 12.04 |
|         | 15.05 |         | 11.18 |
|         | 1.07  |         | 1.08  |
|         | -0.07 |         | -0.08 |
| 475.00  | 12.00 | 368.00  | 8.70  |
| 245.00  | 20.82 | 363.00  | 14.33 |
| 2441.00 | 1.76  | 3104.00 | 1.26  |
| 3369.00 | 2.79  | 3610.00 | 1.75  |
| 6812.00 | 5.28  | 5520.00 | 3.39  |
| 5997.00 | 8.40  | 5446.00 | 4.96  |

rZ

1.01

-0.20

0.72

-0.59

0.85

0.18

-1.08

-0.89

0.64

-0.29

0.87

-0.67

-0.25

-0.38

2.16

2.92 x

3.55 x

debris a,b

toxic a,b

-0.24

-0.47

2.20

1.23

-0.88

-0.82

1.79

-0.67

3.16 y

1.81

1.27

0.32

-0.58

-0.45

-0.31

0.28

-0.35

-0.16

1.32

-0.85

1.82

-0.48

-0.09

3.35

-0.55

0.13

-0.48

0.45

-0.78

0.00

-0.52

-0.36

-0.09

1.10

-0.16

2.17 x

art a,b

-0.98

1.35

0.01

0.89

-0.59

0.77

-1.13

-0.94

-0.28

0.85

0.95

-0.88

-0.31

-0.56

-0.52

-0.22

-0.05

0.79

0.27

-1.01

-0.67

0.01

-1.01

4.31

-0.07

-0.02

-0.23

0.95

1.25 y

0.70

1.07

-0.94

-1.41

2.52

-0.70

0.01

-0.53

-0.36

-1.06

-0.19

-1.43

-1.15

-0.40

-1.17

0.41

0.29

-0.49

0.24

-0.64

-0.65

-0.08

1.49

1.30

1.42 y

-0.43

-0.80

-0.71

-0.72

-0.07

0.16

1.37

-0.80

0.10

-1.13

-0.64

-0.74

-1.28

-1.30

-0.68

1.37 y

1.85

-0.28

4.37 y

1.31

0.11

-0.23

2.01 debris a,b

0.10

0.15

-1.08

-0.64

0.51

0.42

1.17 x

0.33

0.49

-0.94



0.68

2.77

0.30

-0.08

-0.97

-0.45

1.91

1.14

0.97

0.72

-0.56

-0.11

-0.73

0.01

0.06

0.00

0.21

-0.97

0.24

0.43

-0.75

-1.27

-0.75

-0.20

-0.73

0.30

0.20

0.98

1.33

-0.84

-0.63

1.90

-0.31

-1.03

0.20

0.94

-0.79

-1.37

-0.08

0.45

1.89

-0.58

-0.48

0.12

-0.47 x

toxic b,c

-0.73

-0.04

2.05 y

0.22

1.93

-0.27

-0.87

-0.50

1.10

4.72 x

toxic b,c

2.05

-0.91

0.44

0.92

0.10

3.43

3.03

1.72

-0.70

1.45

0.26

-1.07

-0.42

-0.07

1.70

0.36

1.40

-0.42

0.34

1.13

0.35

0.21

1.20

1.63

-1.26

1.79

0.05

0.83

0.59

-0.28

0.16

-1.05

-1.18

-1.14

-0.32

-0.46

1.46

-0.75

-0.83

-1.13  
0.18  
-0.71  
1.97 x            debris a,b  
0.41  
1.60  
-0.96  
-0.26  
0.05  
0.27  
-0.30  
-0.66  
-0.62  
-1.23  
-0.50  
-0.96  
-0.88  
-0.64  
-0.28  
-0.70  
-1.12  
0.26  
-0.62  
0.29  
0.39  
-0.82  
0.25  
1.32  
4.70  
0.00  
-0.69  
-0.09  
-0.98  
2.71  
0.24  
1.24  
-1.52  
0.42  
0.19  
0.14 x            toxic a,b,c  
-0.95  
-0.23  
-0.37  
0.25  
-1.26  
-1.42  
-1.36

1.19

3.02 y

2.58

1.51

0.39

1.72

0.11

0.15

-0.66

0.92

0.34

-0.02

-0.29

-0.66

-0.73

0.51

0.67

-0.88

-1.12

0.57

2.36 x

debris a,b

1.56

0.63

4.42

0.34

-0.37

0.32

0.35

-0.01

1.51

0.88

7.59 x

toxic b

-0.11

0.64

-0.25

0.16

0.72 0.01

-0.33

1.42

2774.00

5.41

| Plate    | Well | Gene                   | GeneID             | Cell Count | % inf | Abs Dev |
|----------|------|------------------------|--------------------|------------|-------|---------|
| 50055.00 | A02  | M-010280- phospholip   | 23236.00 PLCB1     | 3805.00    | 1.81  | 0.64    |
| 50055.00 | A04  | M-017868- DnaJ (Hsp4   | 23234.00 DNAJC9    | 2837.00    | 3.07  | 0.62    |
| 50055.00 | A05  | M-014167- transcriptic | 22980.00 TCF25     | 2753.00    | 7.63  | 5.18    |
| 50055.00 | A06  | M-022715- exocyst cor  | 23233.00 EXOC6B    | 2902.00    | 2.69  | 0.24    |
| 50055.00 | A07  | M-018162- KIAA0980 p   | 22981.00 RP4-691N2 | 2158.00    | 2.78  | 0.33    |
| 50055.00 | A08  | M-026297- TBC1 doma    | 23232.00 TBC1D12   | 2391.00    | 3.09  | 0.64    |
| 50055.00 | A09  | M-026391- DIP2 disco-  | 22982.00 DIP2C     | 2946.00    | 2.34  | 0.11    |
| 50055.00 | A10  | M-024222- KIAA0746 p   | 23231.00 KIAA0746  | 2236.00    | 3.22  | 0.77    |
| 50055.00 | A11  | M-029652- programme    | 22984.00 PDCD11    | 2052.00    | 2.44  | 0.01    |
| 50055.00 | A12  | M-008544- phospholip   | 23228.00 PLCL2     | 2739.00    | 4.86  | 2.41    |
| 50055.00 | A13  | M-007633- synaptic ve  | 22987.00 SV2C      | 2022.00    | 1.93  | 0.52    |
| 50055.00 | A14  | M-017529- nucleopori   | 23225.00 NUP210    | 3002.00    | 2.27  | 0.18    |
| 50055.00 | A15  | M-023571- myosin, he   | 22989.00 MYH15     | 1360.00    | 4.85  | 2.40    |
| 50055.00 | A16  | M-019259- spectrin re  | 23224.00 SYNE2     | 2420.00    | 4.21  | 1.76    |
| 50055.00 | A17  | M-014158- pecanex hc   | 22990.00 PCNX      | 2535.00    | 4.26  | 1.81    |
| 50055.00 | A18  | M-014081- ribosomal l  | 23223.00 RRP12     | 1570.00    | 4.08  | 1.63    |
| 50055.00 | A19  | M-028449- KIAA0194 p   | 22993.00 KIAA0194  | 2430.00    | 3.83  | 1.38    |
| 50055.00 | A20  | M-026663- deltex 4 ho  | 23220.00 DTX4      | 2552.00    | 2.12  | 0.33    |
| 50055.00 | A21  | M-023335- 5-azacytidii | 22994.00 AZI1      | 2578.00    | 2.87  | 0.42    |
| 50055.00 | A23  | M-022241- centrosom.   | 22995.00 CEP152    | 1787.00    | 5.37  | 2.92    |
| 50055.00 | B02  | M-014079- TBC1 (tre-2  | 23216.00 TBC1D1    | 3198.00    | 1.50  | 0.95    |
| 50055.00 | B04  | M-012483- synaptogyr   | 23546.00 SYNGR4    | 2358.00    | 0.85  | 1.60    |
| 50055.00 | B05  | M-015682- activity-reg | 23237.00 ARC       | 2667.00    | 0.49  | 1.96    |
| 50055.00 | B06  | M-019950- ATPase, H+   | 23545.00 ATP6V0A2  | 3360.00    | 0.27  | 2.18    |
| 50055.00 | B07  | M-019152- KIAA0922     | 23240.00 KIAA0922  | 5075.00    | 3.59  | 1.14    |
| 50055.00 | B08  | M-008081- seizure rel  | 23544.00 SEZ6L     | 2127.00    | 1.41  | 1.04    |
| 50055.00 | B09  | M-022015- phosphofu    | 23241.00 PACS2     | 3613.00    | 0.94  | 1.51    |
| 50055.00 | B10  | M-020616- RNA bindin   | 23543.00 RBM9      | 3140.00    | 0.48  | 1.97    |
| 50055.00 | B11  | M-021017- cordon-ble   | 23242.00 COBL      | 3500.00    | 2.31  | 0.14    |
| 50055.00 | B12  | M-007410- solute carri | 23539.00 SLC16A8   | 1882.00    | 2.76  | 0.31    |
| 50055.00 | B13  | M-023451- ankyrin re   | 23243.00 ANKRD28   | 3051.00    | 1.47  | 0.98    |
| 50055.00 | B14  | M-019949- transportin  | 23534.00 TNPO3     | 2276.00    | 1.01  | 1.44    |
| 50055.00 | B15  | M-014071- SCC-112 pr   | 23244.00 SCC-112   | 2996.00    | 3.44  | 0.99    |
| 50055.00 | B16  | M-008032- monocyte f   | 23531.00 MMD       | 3675.00    | 2.23  | 0.22    |
| 50055.00 | B17  | M-014072- astrotactin  | 23245.00 ASTN2     | 3644.00    | 1.76  | 0.69    |
| 50055.00 | B18  | M-012811- centaurin, l | 23527.00 CENTB2    | 3898.00    | 5.05  | 2.60    |
| 50055.00 | B19  | M-014065- block of pri | 23246.00 BOP1      | 2303.00    | 1.09  | 1.36    |
| 50055.00 | B20  | M-012454- calcineurin  | 23523.00 CABIN1    | 3878.00    | 4.54  | 2.09    |
| 50055.00 | B21  | M-003984- KIAA0556     | 23247.00 KIAA0556  | 3079.00    | 1.01  | 1.44    |
| 50055.00 | B23  | M-021712- KIAA0460     | 23248.00 KIAA0460  | 2673.00    | 6.17  | 3.72    |
| 50055.00 | C02  | M-014080- F-box prote  | 23219.00 FBXO28    | 2884.00    | 2.91  | 0.46    |
| 50055.00 | C04  | M-023480- neurobeacl   | 23218.00 NBEAL2    | 1945.00    | 1.75  | 0.70    |
| 50055.00 | C05  | M-021795- chromoson    | 22996.00 C1orf34   | 3582.00    | 2.85  | 0.40    |
| 50055.00 | C06  | M-023902- KIAA1086     | 23217.00 KIAA1086  | 3593.00    | 2.78  | 0.33    |
| 50055.00 | C07  | M-026538- immunoglc    | 22997.00 IGSF9B    | 2145.00    | 3.08  | 0.63    |
| 50055.00 | C08  | M-014078- BAT2 doma    | 23215.00 BAT2D1    | 2956.00    | 3.59  | 1.14    |

|              |                        |                    |         |      |             |
|--------------|------------------------|--------------------|---------|------|-------------|
| 50055.00 C09 | M-024200- hypothetic   | 22998.00 DKFZP686A | 1689.00 | 0.53 | 1.92        |
| 50055.00 C10 | M-022515- exportin 6   | 23214.00 XPO6      | 3646.00 | 3.54 | 1.09        |
| 50055.00 C11 | M-014159- regulating   | 22999.00 RIMS1     | 3093.00 | 2.81 | 0.36        |
| 50055.00 C12 | M-006643- sulfatase 1  | 23213.00 SULF1     | 2343.00 | 2.01 | 0.44        |
| 50055.00 C13 | M-028430- KIAA0825 f   | 23004.00 KIAA0825  | 2308.00 | 2.43 | 0.02        |
| 50055.00 C14 | M-014077- RRS1 ribos   | 23212.00 RRS1      | 1204.00 | 1.99 | 0.46        |
| 50055.00 C15 | M-022225- mitogen ac   | 23005.00 MAPKBP1   | 2675.00 | 5.16 | 2.71        |
| 50055.00 C16 | M-023865- chromoson    | 23211.00 C19orf7   | 2172.00 | 2.12 | 0.33        |
| 50055.00 C17 | M-010279- phospholip   | 23007.00 PLCH1     | 3074.00 | 1.72 | 0.73        |
| 50055.00 C18 | M-018292- synaptotag   | 23208.00 SYT11     | 2550.00 | 2.63 | 0.18        |
| 50055.00 C19 | M-017330- golgi autoa  | 23015.00 GOLGA8A   | 2228.00 | 2.92 | 0.47        |
| 50055.00 C20 | M-022168- pleckstrin f | 23207.00 PLEKHM2   | 3026.00 | 2.48 | 0.03        |
| 50055.00 C21 | M-014160- exosome c    | 23016.00 EXOSC7    | 2320.00 | 1.55 | 0.90        |
| 50055.00 C23 | M-017340- Fas apopto   | 23017.00 FAIM2     | 3005.00 | 1.06 | 1.39        |
| 50055.00 D02 | M-019563- MYST histo   | 23522.00 MYST4     | 5327.00 | 6.19 | <b>3.74</b> |
| 50055.00 D04 | M-017870- R3H domai    | 23518.00 R3HDM1    | 3213.00 | 1.93 | 0.52        |
| 50055.00 D05 | M-021769- ATPase, Cl   | 23250.00 ATP11A    | 4319.00 | 2.64 | 0.19        |
| 50055.00 D06 | M-031902- superkiller  | 23517.00 SKIV2L2   | 2332.00 | 3.86 | 1.41        |
| 50055.00 D07 | M-022286- KIAA1024 f   | 23251.00 KIAA1024  | 2524.00 | 2.38 | 0.07        |
| 50055.00 D08 | M-007569- solute carri | 23516.00 SLC39A14  | 2196.00 | 1.23 | 1.22        |
| 50055.00 D09 | M-027582- OTU domai    | 23252.00 OTUD3     | 3005.00 | 2.63 | 0.18        |
| 50055.00 D10 | M-012976- MORC fam     | 23515.00 MORC3     | 3021.00 | 7.71 | <b>5.26</b> |
| 50055.00 D11 | M-014066- ankyrin rep  | 23253.00 ANKRD12   | 2968.00 | 2.83 | 0.38        |
| 50055.00 D12 | M-025937- KIAA0146     | 23514.00 KIAA0146  | 2108.00 | 1.99 | 0.46        |
| 50055.00 D13 | M-023376- KIAA0802     | 23255.00 KIAA0802  | 2718.00 | 1.84 | 0.61        |
| 50055.00 D14 | M-010500- scribbled h  | 23513.00 SCRIB     | 1817.00 | 1.43 | 1.02        |
| 50055.00 D15 | M-010943- sec1 family  | 23256.00 SCFD1     | 1955.00 | 1.18 | 1.27        |
| 50055.00 D16 | M-012845- protein O-f  | 23509.00 POFUT1    | 2866.00 | 6.91 | <b>4.46</b> |
| 50055.00 D17 | M-026774- RAB6 inter   | 23258.00 RAB6IP1   | 1866.00 | 3.05 | 0.60        |
| 50055.00 D18 | M-021974- tetratricop  | 23508.00 TTC9      | 3325.00 | 3.73 | 1.28        |
| 50055.00 D19 | M-025979- DDHD dom     | 23259.00 DDHD2     | 3384.00 | 4.11 | 1.66        |
| 50055.00 D20 | M-025099- KIAA0240     | 23506.00 KIAA0240  | 2852.00 | 1.26 | 1.19        |
| 50055.00 D21 | M-021559- calmodulin   | 23261.00 CAMTA1    | 3903.00 | 4.89 | 2.44        |
| 50055.00 D23 | M-010098- MCF.2 cell   | 23263.00 MCF2L     | 3190.00 | 2.26 | 0.19        |
| 50055.00 E02 | M-017221- acyl-CoA sy  | 23205.00 ACSBG1    | 3179.00 | 6.01 | <b>3.56</b> |
| 50055.00 E04 | M-004321- ADP-ribosy   | 23204.00 ARL6IP1   | 1139.00 | 4.21 | 1.76        |
| 50055.00 E05 | M-015369- CCR4-NOT     | 23019.00 CNOT1     | 1329.00 | 2.78 | 0.33        |
| 50055.00 E06 | M-029912- KIAA0280     | 23201.00 KIAA0280  | 2292.00 | 7.98 | <b>5.53</b> |
| 50055.00 E07 | M-016891- palladin, cy | 23022.00 PALLD     | 2802.00 | 1.89 | 0.56        |
| 50055.00 E08 | M-022627- KIAA0182     | 23199.00 KIAA0182  | 2893.00 | 3.21 | 0.76        |
| 50055.00 E09 | M-023265- PDZ domai    | 23024.00 PDZRN3    | 2501.00 | 6.88 | <b>4.43</b> |
| 50055.00 E10 | M-022757- proteasom    | 23198.00 PSME4     | 2666.00 | 5.29 | <b>2.84</b> |
| 50055.00 E11 | M-031249- unc-13 hon   | 23025.00 UNC13A    | 3251.00 | 2.55 | 0.10        |
| 50055.00 E12 | M-010649- UBX domai    | 23197.00 UBXD8     | 3413.00 | 2.55 | 0.10        |
| 50055.00 E13 | M-021586- myosin XVI   | 23026.00 MYO16     | 1940.00 | 2.37 | 0.08        |
| 50055.00 E14 | M-014186- family with  | 23196.00 FAM120A   | 2675.00 | 5.01 | 2.56        |
| 50055.00 E15 | M-022399- RNA bindin   | 23029.00 RBM34     | 1506.00 | 5.18 | 2.73        |

|          |     |                          |          |          |         |      |      |
|----------|-----|--------------------------|----------|----------|---------|------|------|
| 50055.00 | E16 | M-009786- MDN1, mic      | 23195.00 | MDN1     | 2457.00 | 2.08 | 0.37 |
| 50055.00 | E17 | M-004290- jumonji doi    | 23030.00 | JMJD2B   | 2191.00 | 4.93 | 2.48 |
| 50055.00 | E18 | M-009499- glucosidase    | 23193.00 | GANAB    | 3858.00 | 3.91 | 1.46 |
| 50055.00 | E19 | M-019205- dopey fami     | 23033.00 | DOPEY1   | 3206.00 | 1.62 | 0.83 |
| 50055.00 | E20 | M-005786- ATG4 autoj     | 23192.00 | ATG4B    | 2868.00 | 3.56 | 1.11 |
| 50055.00 | E21 | M-013911- sterile alph   | 23034.00 | SAMD4A   | 3279.00 | 0.91 | 1.54 |
| 50055.00 | E23 | M-022586- PH domain      | 23035.00 | PHLPPL   | 5158.00 | 1.59 | 0.86 |
| 50055.00 | F02 | M-022532- transmemt      | 23505.00 | TMEM131  | 5399.00 | 3.67 | 1.22 |
| 50055.00 | F04 | M-027090- RIMS bindi     | 23504.00 | RIMBP2   | 3961.00 | 4.62 | 2.17 |
| 50055.00 | F05 | M-017425- zinc finger    | 23264.00 | ZC3H7B   | 2777.00 | 1.58 | 0.87 |
| 50055.00 | F06 | M-031136- zinc finger,   | 23503.00 | ZFYVE26  | 3881.00 | 4.17 | 1.72 |
| 50055.00 | F07 | M-021448- exocyst cor    | 23265.00 | EXOC7    | 3160.00 | 5.06 | 2.61 |
| 50055.00 | F08 | M-008666- 3-hydroxya     | 23498.00 | HAAO     | 2066.00 | 3.39 | 0.94 |
| 50055.00 | F09 | M-026304- dynamin bi     | 23268.00 | DNMBP    | 2996.00 | 2.80 | 0.35 |
| 50055.00 | F10 | M-009561- chromobo       | 23492.00 | CBX7     | 3199.00 | 6.72 | 4.27 |
| 50055.00 | F11 | M-022224- MAX gene       | 23269.00 | MGA      | 2832.00 | 3.32 | 0.87 |
| 50055.00 | F12 | M-009492- TDP-glucos     | 23483.00 | TGDS     | 2572.00 | 3.46 | 1.01 |
| 50055.00 | F13 | M-017980- TSPY-like 4    | 23270.00 | TSPYL4   | 2976.00 | 4.77 | 2.32 |
| 50055.00 | F14 | M-012509- Sec61 gami     | 23480.00 | SEC61G   | 2083.00 | 7.11 | 4.66 |
| 50055.00 | F15 | M-022091- calmodulin     | 23271.00 | CAMSAP1L | 4162.00 | 3.05 | 0.60 |
| 50055.00 | F16 | M-012837- iron-sulfur    | 23479.00 | ISCU     | 1526.00 | 1.11 | 1.34 |
| 50055.00 | F17 | M-020306- chromoson      | 23272.00 | C3orf63  | 1367.00 | 7.39 | 4.94 |
| 50055.00 | F18 | M-006038- SEC11 hom      | 23478.00 | SEC11A   | 3403.00 | 4.64 | 2.19 |
| 50055.00 | F19 | M-026004- KIAA0367       | 23273.00 | KIAA0367 | 4319.00 | 4.03 | 1.58 |
| 50055.00 | F20 | M-003989- quinolinate    | 23475.00 | QPR1     | 2861.00 | 2.06 | 0.39 |
| 50055.00 | F21 | M-022485- KIAA0350       | 23274.00 | KIAA0350 | 3155.00 | 2.76 | 0.31 |
| 50055.00 | F23 | M-014064- protein O-f    | 23275.00 | POFUT2   | 2912.00 | 4.29 | 1.84 |
| 50055.00 | G02 | M-014185- cytoplasmic    | 23191.00 | CYFIP1   | 3461.00 | 3.00 | 0.55 |
| 50055.00 | G04 | M-014184- UBX domai      | 23190.00 | UBXD2    | 2887.00 | 5.40 | 2.95 |
| 50055.00 | G05 | M-024873- zinc finger    | 23036.00 | ZNF292   | 2873.00 | 4.39 | 1.94 |
| 50055.00 | G06 | M-012879- ankyrin rep    | 23189.00 | ANKRD15  | 2529.00 | 1.19 | 1.26 |
| 50055.00 | G07 | M-008056- PDZ domai      | 23037.00 | PDZD2    | 3987.00 | 2.81 | 0.36 |
| 50055.00 | G08 | M-026522- pleckstrin l   | 23187.00 | PHLDB1   | 2409.00 | 1.04 | 1.41 |
| 50055.00 | G09 | M-016542- WD and tei     | 23038.00 | WDTC1    | 2183.00 | 4.81 | 2.36 |
| 50055.00 | G10 | M-014076- REST corep     | 23186.00 | RCOR1    | 3081.00 | 2.01 | 0.44 |
| 50055.00 | G11 | M-016571- exportin 7     | 23039.00 | XPO7     | 2956.00 | 2.23 | 0.22 |
| 50055.00 | G12 | M-008625- DIP2 disco-    | 23181.00 | DIP2A    | 3119.00 | 2.05 | 0.40 |
| 50055.00 | G13 | M-026971- MON2 hon       | 23041.00 | MON2     | 2178.00 | 1.52 | 0.93 |
| 50055.00 | G14 | M-023452- raftlin, lipic | 23180.00 | RFTN1    | 2644.00 | 0.91 | 1.54 |
| 50055.00 | G15 | M-022519- pyridoxal-d    | 23042.00 | PDXDC1   | 2695.00 | 3.78 | 1.33 |
| 50055.00 | G16 | M-014087- centrosom.     | 23177.00 | CEP68    | 3110.00 | 2.03 | 0.42 |
| 50055.00 | G17 | M-024204- furry homc     | 23045.00 | FRYL     | 3503.00 | 1.88 | 0.57 |
| 50055.00 | G18 | M-010647- septin 8       | 23176.00 | SEPT8    | 2753.00 | 2.43 | 0.02 |
| 50055.00 | G19 | M-026214- formin binc    | 23048.00 | FNBP1    | 2996.00 | 1.77 | 0.68 |
| 50055.00 | G20 | M-017427- lipin 1        | 23175.00 | LPIN1    | 5854.00 | 2.70 | 0.25 |
| 50055.00 | G21 | M-014145- zinc fingers   | 23051.00 | ZHX3     | 4698.00 | 3.49 | 1.04 |
| 50055.00 | G23 | M-026750- endonuclea     | 23052.00 | ENDOD1   | 3751.00 | 4.85 | 2.40 |

|              |                               |           |          |         |      |      |
|--------------|-------------------------------|-----------|----------|---------|------|------|
| 50055.00 H02 | M-012508- ethylmalon          | 23474.00  | ETHE1    | 3440.00 | 1.92 | 0.53 |
| 50055.00 H04 | M-005807- calpain 7           | 23473.00  | CAPN7    | 2977.00 | 0.94 | 1.51 |
| 50055.00 H05 | M-014549- kelch-like 1        | 23276.00  | KLHL18   | 2808.00 | 2.81 | 0.36 |
| 50055.00 H06 | M-009547- glycine C-a         | 23464.00  | GCAT     | 2887.00 | 2.67 | 0.22 |
| 50055.00 H07 | M-010152- KIAA0664            | 23277.00  | KIAA0664 | 2911.00 | 1.82 | 0.63 |
| 50055.00 H08 | M-005209- isoprenylcy         | 23463.00  | ICMT     | 1785.00 | 1.79 | 0.66 |
| 50055.00 H09 | M-029990- nucleopori          | 23279.00  | NUP160   | 1842.00 | 1.85 | 0.60 |
| 50055.00 H10 | M-020061- splicing fac        | 23451.00  | SF3B1    | 687.00  | 3.20 | 0.75 |
| 50055.00 H11 | M-030156- IQ motif an         | 440073.00 | IQSEC3   | 2362.00 | 1.61 | 0.84 |
| 50055.00 H12 | M-020085- splicing fac        | 23450.00  | SF3B3    | 1163.00 | 2.67 | 0.22 |
| 50055.00 H13 | M-006850- KIAA0774            | 23281.00  | KIAA0774 | 2476.00 | 1.66 | 0.79 |
| 50055.00 H14 | M-010708- solute carri        | 23446.00  | SLC44A1  | 2991.00 | 1.17 | 1.28 |
| 50055.00 H15 | M-021449- cleavage st         | 23283.00  | CSTF2T   | 2501.00 | 1.96 | 0.49 |
| 50055.00 H16 | M-007539- solute carri        | 23443.00  | SLC35A3  | 1846.00 | 1.35 | 1.10 |
| 50055.00 H17 | M-021628- KIAA1107            | 23285.00  | KIAA1107 | 2919.00 | 2.02 | 0.43 |
| 50055.00 H18 | M-013549- orthopedia          | 23440.00  | OTP      | 2664.00 | 4.02 | 1.57 |
| 50055.00 H19 | M-014058- WW and C            | 23286.00  | WWC1     | 3168.00 | 2.37 | 0.08 |
| 50055.00 H20 | M-009603- ATPase, (N          | 23439.00  | ATP1B4   | 2791.00 | 1.11 | 1.34 |
| 50055.00 H21 | M-016993- IQ motif co         | 23288.00  | IQCE     | 4140.00 | 3.62 | 1.17 |
| 50055.00 H23 | M-024431- KIAA0819            | 23289.00  | KIAA0819 | 2483.00 | 6.40 | 3.95 |
| 50055.00 I02 | M-014086- zinc finger,        | 23174.00  | ZCCHC14  | 3747.00 | 0.93 | 1.52 |
| 50055.00 I04 | M-016146- KIAA0157            | 23172.00  | KIAA0157 | 2694.00 | 1.67 | 0.78 |
| 50055.00 I05 | M-026438- KIAA0913            | 23053.00  | KIAA0913 | 1628.00 | 3.38 | 0.93 |
| 50055.00 I06 | M-008514- glycerol-3- $\beta$ | 23171.00  | GPD1L    | 1922.00 | 1.66 | 0.79 |
| 50055.00 I07 | M-008573- nicotinami          | 23057.00  | NMNAT2   | 2582.00 | 0.35 | 2.10 |
| 50055.00 I08 | M-014094- tubulin tyrc        | 23170.00  | TTL12    | 2197.00 | 2.46 | 0.01 |
| 50055.00 I09 | M-014449- clusterin as        | 23059.00  | CLUAP1   | 2122.00 | 4.01 | 1.56 |
| 50055.00 I10 | M-007546- solute carri        | 23169.00  | SLC35D1  | 2716.00 | 4.42 | 1.97 |
| 50055.00 I11 | M-022257- zinc finger         | 23060.00  | ZNF609   | 2366.00 | 4.31 | 1.86 |
| 50055.00 I12 | M-014104- Rtf1, Paf1/         | 23168.00  | RTF1     | 2126.00 | 0.71 | 1.74 |
| 50055.00 I13 | M-031872- TBC1 doma           | 23061.00  | TBC1D9B  | 2221.00 | 3.24 | 0.79 |
| 50055.00 I14 | M-025913- KIAA0143            | 23167.00  | KIAA0143 | 2584.00 | 1.47 | 0.98 |
| 50055.00 I15 | M-012908- golgi associ        | 23062.00  | GGA2     | 1961.00 | 5.00 | 2.55 |
| 50055.00 I16 | M-014103- stabilin 1          | 23166.00  | STAB1    | 2372.00 | 0.38 | 2.07 |
| 50055.00 I17 | M-026287- wings apar          | 23063.00  | WAPAL    | 1489.00 | 1.41 | 1.04 |
| 50055.00 I18 | M-010646- nucleopori          | 23165.00  | NUP205   | 980.00  | 5.00 | 2.55 |
| 50055.00 I19 | M-021420- senataxin           | 23064.00  | SETX     | 2389.00 | 5.86 | 3.41 |
| 50055.00 I20 | M-014102- myosin phc          | 23164.00  | M-RIP    | 2732.00 | 1.21 | 1.24 |
| 50055.00 I21 | M-014146- KIAA0090            | 23065.00  | KIAA0090 | 3734.00 | 5.70 | 3.25 |
| 50055.00 I23 | M-023448- cullin-assoc        | 23066.00  | CAND2    | 3376.00 | 0.71 | 1.74 |
| 50055.00 J02 | M-013411- histidyl-tRN        | 23438.00  | HARS2    | 3442.00 | 0.84 | 1.61 |
| 50055.00 J04 | M-005864- elastase 3B         | 23436.00  | ELA3B    | 3046.00 | 1.54 | 0.91 |
| 50055.00 J05 | M-017845- Smg-6 hom           | 23293.00  | SMG6     | 2409.00 | 2.70 | 0.25 |
| 50055.00 J06 | M-019492- chromoson           | 23434.00  | C3orf27  | 1351.00 | 3.48 | 1.03 |
| 50055.00 J07 | M-025085- ankyrin rep         | 23294.00  | ANKS1A   | 1688.00 | 4.38 | 1.93 |
| 50055.00 J08 | M-021474- adaptor-rel         | 23431.00  | AP4E1    | 2929.00 | 4.47 | 2.02 |
| 50055.00 J09 | M-022620- mahogunin           | 23295.00  | MGRN1    | 2486.00 | 1.37 | 1.08 |



|          |     |                         |          |           |         |      |      |
|----------|-----|-------------------------|----------|-----------|---------|------|------|
| 50055.00 | J10 | M-006057- trypase de    | 23430.00 | TPSD1     | 3552.00 | 4.98 | 2.53 |
| 50055.00 | J11 | M-020304- ATM/ATR-5     | 23300.00 | ASCIZ     | 1453.00 | 2.00 | 0.45 |
| 50055.00 | J12 | M-007618- solute carri  | 23428.00 | SLC7A8    | 3016.00 | 4.54 | 2.09 |
| 50055.00 | J13 | M-014061- EH domain     | 23301.00 | EHBP1     | 2993.00 | 1.57 | 0.88 |
| 50055.00 | J14 | M-026981- glutamate i   | 23426.00 | GRIP1     | 2403.00 | 1.96 | 0.49 |
| 50055.00 | J15 | M-023005- WSC doma      | 23302.00 | WSCD1     | 2735.00 | 1.94 | 0.51 |
| 50055.00 | J16 | M-008051- transmemt     | 23423.00 | TMED3     | 2397.00 | 2.42 | 0.03 |
| 50055.00 | J17 | M-026966- KIAA0286 p    | 23306.00 | KIAA0286  | 1545.00 | 2.01 | 0.44 |
| 50055.00 | J18 | M-013024- frequenin t   | 23413.00 | FREQ      | 2410.00 | 2.12 | 0.33 |
| 50055.00 | J19 | M-029587- FK506 bind    | 23307.00 | FKBP15    | 2636.00 | 1.71 | 0.74 |
| 50055.00 | J20 | M-020053- COMM dor      | 23412.00 | COMMMD3   | 2042.00 | 2.15 | 0.30 |
| 50055.00 | J21 | M-007812- inducible T   | 23308.00 | ICOSLG    | 1583.00 | 1.96 | 0.49 |
| 50055.00 | J23 | M-031246- SIN3 homo     | 23309.00 | SIN3B     | 2433.00 | 1.15 | 1.30 |
| 50055.00 | K02 | M-012881- golgi associ  | 23163.00 | GGA3      | 3513.00 | 4.21 | 1.76 |
| 50055.00 | K04 | M-009381- sorting nex   | 23161.00 | SNX13     | 4159.00 | 2.89 | 0.44 |
| 50055.00 | K05 | M-027025- SET domair    | 23067.00 | SETD1B    | 2960.00 | 1.32 | 1.13 |
| 50055.00 | K06 | M-022651- WD repeat     | 23160.00 | WDR43     | 2161.00 | 1.71 | 0.74 |
| 50055.00 | K07 | M-014142- KIAA0082      | 23070.00 | KIAA0082  | 2809.00 | 2.42 | 0.03 |
| 50055.00 | K08 | M-010024- chloride ch   | 23155.00 | CLCC1     | 4081.00 | 2.55 | 0.10 |
| 50055.00 | K09 | M-026913- KIAA0701 p    | 23074.00 | KIAA0701  | 2937.00 | 2.38 | 0.07 |
| 50055.00 | K10 | M-012835- neurochon     | 23154.00 | NCDN      | 3759.00 | 2.93 | 0.48 |
| 50055.00 | K11 | M-010323- SWAP-70 p     | 23075.00 | SWAP70    | 3471.00 | 2.71 | 0.26 |
| 50055.00 | K12 | M-015185- capicua ho    | 23152.00 | CIC       | 3943.00 | 1.90 | 0.55 |
| 50055.00 | K13 | M-031402- ribosomal l   | 23076.00 | RRP1B     | 2444.00 | 2.21 | 0.24 |
| 50055.00 | K14 | M-024634- death-indu    | 23151.00 | DIP       | 3347.00 | 4.57 | 2.12 |
| 50055.00 | K15 | M-006951- MYC bindir    | 23077.00 | MYCBP2    | 4295.00 | 3.66 | 1.21 |
| 50055.00 | K16 | M-023262- FERM dom      | 23150.00 | FRMD4B    | 3221.00 | 2.98 | 0.53 |
| 50055.00 | K17 | M-021694- KIAA0564 p    | 23078.00 | RP11-125A | 2699.00 | 4.19 | 1.74 |
| 50055.00 | K18 | M-014114- FCH domai     | 23149.00 | FCHO1     | 3595.00 | 4.14 | 1.69 |
| 50055.00 | K19 | M-025311- KIAA0241      | 23080.00 | KIAA0241  | 2506.00 | 2.87 | 0.42 |
| 50055.00 | K20 | M-025327- NAC alpha     | 23148.00 | NACAD     | 1760.00 | 1.76 | 0.69 |
| 50055.00 | K21 | M-004293- jumonji do    | 23081.00 | JMJD2C    | 4218.00 | 4.39 | 1.94 |
| 50055.00 | K23 | M-010942- ELKS/RAB6     | 23085.00 | ERC1      | 2920.00 | 4.28 | 1.83 |
| 50055.00 | L02 | M-004827- sirtuin (sile | 23410.00 | SIRT3     | 4623.00 | 2.49 | 0.04 |
| 50055.00 | L04 | M-012445- sirtuin (sile | 23409.00 | SIRT4     | 4090.00 | 3.37 | 0.92 |
| 50055.00 | L05 | M-026539- non-SMC c     | 23310.00 | NCAPD3    | 4251.00 | 2.52 | 0.07 |
| 50055.00 | L06 | M-013448- sirtuin (sile | 23408.00 | SIRT5     | 3394.00 | 2.27 | 0.18 |
| 50055.00 | L07 | M-014049- Dmx-like 2    | 23312.00 | DMXL2     | 3437.00 | 6.75 | 4.30 |
| 50055.00 | L08 | M-013104- coactosin-l   | 23406.00 | COTL1     | 1411.00 | 9.07 | 6.62 |
| 50055.00 | L09 | M-024630- chromoson     | 23313.00 | C22orf9   | 2541.00 | 1.73 | 0.72 |
| 50055.00 | L10 | M-003483- Dicer1, Dcr   | 23405.00 | DICER1    | 4002.00 | 0.97 | 1.48 |
| 50055.00 | L11 | M-023161- SATB home     | 23314.00 | SATB2     | 2119.00 | 2.12 | 0.33 |
| 50055.00 | L12 | M-016975- exosome c     | 23404.00 | EXOSC2    | 3188.00 | 1.69 | 0.76 |
| 50055.00 | L13 | M-007628- solute carri  | 23315.00 | SLC9A8    | 1982.00 | 1.51 | 0.94 |
| 50055.00 | L14 | M-023753- F-box prote   | 23403.00 | FBXO46    | 2452.00 | 1.06 | 1.39 |
| 50055.00 | L15 | M-027122- cut-like 2 (l | 23316.00 | CUTL2     | 2993.00 | 2.64 | 0.19 |
| 50055.00 | L16 | M-017869- dullard hor   | 23399.00 | DULLARD   | 4274.00 | 3.81 | 1.36 |

|              |                          |                   |         |      |      |
|--------------|--------------------------|-------------------|---------|------|------|
| 50055.00 L17 | M-010651- DnaJ (Hsp4     | 23317.00 DNAJC13  | 3827.00 | 2.33 | 0.12 |
| 50055.00 L18 | M-004742- peptidylpro    | 23398.00 PPWD1    | 4782.00 | 1.07 | 1.38 |
| 50055.00 L19 | M-021797- zinc finger,   | 23318.00 ZCCHC11  | 4358.00 | 1.72 | 0.73 |
| 50055.00 L20 | M-012853- non-SMC c      | 23397.00 NCAHP    | 2936.00 | 2.18 | 0.27 |
| 50055.00 L21 | M-006955- tripartite r   | 23321.00 TRIM2    | 4395.00 | 2.23 | 0.22 |
| 50055.00 L23 | M-022557- RPGRIP1-lil    | 23322.00 RPGRIP1L | 4097.00 | 1.66 | 0.79 |
| 50055.00 M02 | M-028871- SCO-spond      | 23145.00 SSPO     | 2817.00 | 1.46 | 0.99 |
| 50055.00 M04 | M-014113- zinc finger    | 23144.00 ZC3H3    | 3278.00 | 2.07 | 0.38 |
| 50055.00 M05 | M-014134- exophilin 5    | 23086.00 EXPH5    | 3028.00 | 0.76 | 1.69 |
| 50055.00 M06 | M-014112- leucine-rich   | 23143.00 LRCH1    | 3120.00 | 2.66 | 0.21 |
| 50055.00 M07 | M-006952- tripartite r   | 23087.00 TRIM35   | 3633.00 | 4.62 | 2.17 |
| 50055.00 M08 | M-014118- DCN1, defe     | 23142.00 DCUN1D4  | 3081.00 | 0.45 | 2.00 |
| 50055.00 M09 | M-018897- zinc finger    | 23091.00 ZC3H13   | 3127.00 | 1.66 | 0.79 |
| 50055.00 M10 | M-031841- zinc finger,   | 23140.00 ZZEF1    | 3131.00 | 5.24 | 2.79 |
| 50055.00 M11 | M-023669- signal-indu    | 23094.00 SIPA1L3  | 2520.00 | 5.60 | 3.15 |
| 50055.00 M12 | M-024612- Nedd4 binc     | 23138.00 N4BP3    | 3048.00 | 3.05 | 0.60 |
| 50055.00 M13 | M-024676- IQ motif an    | 23096.00 IQSEC2   | 2722.00 | 3.27 | 0.82 |
| 50055.00 M14 | M-014117- structural r   | 23137.00 SMC5     | 3567.00 | 2.55 | 0.10 |
| 50055.00 M15 | M-008076- sterile alph   | 23098.00 SARM1    | 2479.00 | 2.34 | 0.11 |
| 50055.00 M16 | M-015330- erythrocyte    | 23136.00 EPB41L3  | 4338.00 | 1.24 | 1.21 |
| 50055.00 M17 | M-020320- zinc finger    | 23099.00 ZBTB43   | 2188.00 | 1.33 | 1.12 |
| 50055.00 M18 | M-023013- jumonji do     | 23135.00 JMJD3    | 2530.00 | 1.50 | 0.95 |
| 50055.00 M19 | M-009313- MCF.2 cell     | 23101.00 MCF2L2   | 4211.00 | 3.87 | 1.42 |
| 50055.00 M20 | M-004291- PHD finger     | 23133.00 PHF8     | 3025.00 | 1.49 | 0.96 |
| 50055.00 M21 | M-014127- TBC1 doma      | 23102.00 TBC1D2B  | 3807.00 | 1.97 | 0.48 |
| 50055.00 M23 | M-024404- follistatin-li | 23105.00 FSTL4    | 3994.00 | 0.48 | 1.97 |
| 50055.00 N02 | M-006956- leucyl-tRNA    | 23395.00 LARS2    | 2227.00 | 2.60 | 0.15 |
| 50055.00 N04 | M-026188- KIAA0368       | 23392.00 KIAA0368 | 4996.00 | 7.39 | 4.94 |
| 50055.00 N05 | M-026919- KIAA1033       | 23325.00 KIAA1033 | 2268.00 | 0.97 | 1.48 |
| 50055.00 N06 | M-014019- zinc finger,   | 23390.00 ZDHHC17  | 4430.00 | 6.19 | 3.74 |
| 50055.00 N07 | M-014050- SAM and Si     | 23328.00 SASH1    | 3152.00 | 4.44 | 1.99 |
| 50055.00 N08 | M-027126- thyroid hor    | 23389.00 THRAP2   | 2847.00 | 3.06 | 0.61 |
| 50055.00 N09 | M-026976- KIAA0984 p     | 23329.00 KIAA0984 | 3332.00 | 2.22 | 0.23 |
| 50055.00 N10 | M-014018- NudC dom       | 23386.00 NUDCD3   | 4656.00 | 1.89 | 0.56 |
| 50055.00 N11 | M-014051- tetratricop    | 23331.00 TTC28    | 2364.00 | 7.53 | 5.08 |
| 50055.00 N12 | M-008043- nicastrin      | 23385.00 NCSTN    | 2376.00 | 1.35 | 1.10 |
| 50055.00 N13 | M-025317- dpy-19-like    | 23333.00 DPY19L1  | 2926.00 | 2.32 | 0.13 |
| 50055.00 N14 | M-024592- SPECC1-like    | 23384.00 SPECC1L  | 3222.00 | 1.96 | 0.49 |
| 50055.00 N15 | M-031859- KIAA0467       | 23334.00 KIAA0467 | 3334.00 | 7.80 | 5.35 |
| 50055.00 N16 | M-031981- KIAA0892       | 23383.00 KIAA0892 | 2476.00 | 1.58 | 0.87 |
| 50055.00 N17 | M-012868- desmuslin      | 23336.00 DMN      | 2663.00 | 1.73 | 0.72 |
| 50055.00 N18 | M-014023- Smg-5 hom      | 23381.00 SMG5     | 4287.00 | 6.09 | 3.64 |
| 50055.00 N19 | M-018308- PHD finger     | 23338.00 PHF15    | 3407.00 | 1.70 | 0.75 |
| 50055.00 N20 | M-021531- SLIT-ROBO      | 23380.00 SRGAP2   | 3511.00 | 2.25 | 0.20 |
| 50055.00 N21 | M-014052- vacuolar pr    | 23339.00 VPS39    | 4445.00 | 4.86 | 2.41 |
| 50055.00 N23 | M-014039- spectrin rej   | 23345.00 SYNE1    | 3405.00 | 1.53 | 0.92 |
| 50055.00 O02 | M-014122- RAD54-like     | 23132.00 RAD54L2  | 4831.00 | 6.29 | 3.84 |

|              |                        |          |          |         |       |      |
|--------------|------------------------|----------|----------|---------|-------|------|
| 50055.00 O04 | M-023195- G patch do   | 23131.00 | GPATCH8  | 2899.00 | 2.35  | 0.10 |
| 50055.00 O05 | M-012903- mitochond    | 23107.00 | MRPS27   | 2749.00 | 2.98  | 0.53 |
| 50055.00 O06 | M-026591- hypothetic   | 23130.00 | KIAA0404 | 3418.00 | 3.48  | 1.03 |
| 50055.00 O07 | M-023041- GTPase act   | 23108.00 | GARNL4   | 4614.00 | 2.67  | 0.22 |
| 50055.00 O08 | M-014121- plexin D1    | 23129.00 | PLXND1   | 4215.00 | 2.47  | 0.02 |
| 50055.00 O09 | M-026950- dendrin      | 23109.00 | DDN      | 3781.00 | 3.12  | 0.67 |
| 50055.00 O10 | M-014120- glycosyltra  | 23127.00 | GLT25D2  | 3542.00 | 1.21  | 1.24 |
| 50055.00 O11 | M-024575- trinucleotic | 23112.00 | TNRC6B   | 4159.00 | 3.75  | 1.30 |
| 50055.00 O12 | M-006953- pogo transp  | 23126.00 | POGZ     | 3454.00 | 1.53  | 0.92 |
| 50055.00 O13 | M-019504- chromosom    | 11241.00 | C10orf1  | 3995.00 | 4.73  | 2.28 |
| 50055.00 O14 | M-012895- hypermeth    | 23119.00 | HIC2     | 3741.00 | 1.12  | 1.33 |
| 50055.00 O15 | M-015406- tubulin tyrc | 23093.00 | TTLL5    | 3787.00 | 2.61  | 0.16 |
| 50055.00 O16 | M-022505- KIAA0220-l   | 23117.00 | LOC23117 | 2999.00 | 2.00  | 0.45 |
| 50055.00 O17 | M-012371- ribosomal p  | 11224.00 | RPL35    | 1986.00 | 1.36  | 1.09 |
| 50055.00 O18 | M-021953- KIAA0423     | 23116.00 | KIAA0423 | 3952.00 | 0.94  | 1.51 |
| 50055.00 O19 | M-020364- zinc finger  | 22891.00 | ZNF365   | 3929.00 | 1.35  | 1.10 |
| 50055.00 O20 | M-021839- neurofascir  | 23114.00 | NFASC    | 4379.00 | 1.12  | 1.33 |
| 50055.00 O21 | M-004725- epsin 2      | 22905.00 | EPN2     | 4561.00 | 3.66  | 1.21 |
| 50055.00 O23 | M-012924- WD repeat    | 23001.00 | WDFY3    | 2840.00 | 1.73  | 0.72 |
| 50055.00 P02 | M-024272- KIAA0947 p   | 23379.00 | KIAA0947 | 1570.00 | 7.13  | 4.68 |
| 50055.00 P04 | M-014028- KIAA0409     | 23378.00 | KIAA0409 | 2849.00 | 6.28  | 3.83 |
| 50055.00 P05 | M-014040- dedicator c  | 23348.00 | DOCK9    | 3158.00 | 2.41  | 0.04 |
| 50055.00 P06 | M-014027- KIAA0776     | 23376.00 | KIAA0776 | 3149.00 | 1.75  | 0.70 |
| 50055.00 P07 | M-026131- KIAA1045     | 23349.00 | KIAA1045 | 2636.00 | 1.18  | 1.27 |
| 50055.00 P08 | M-014026- CREB regul   | 23373.00 | CRTC1    | 3110.00 | 5.50  | 3.05 |
| 50055.00 P09 | M-023607- U2-associa   | 23350.00 | SR140    | 2218.00 | 2.39  | 0.06 |
| 50055.00 P10 | M-014031- pumilio ho   | 23369.00 | PUM2     | 2976.00 | 3.83  | 1.38 |
| 50055.00 P11 | M-030359- KIAA0323     | 23351.00 | KIAA0323 | 1990.00 | 2.66  | 0.21 |
| 50055.00 P12 | M-027187- La ribonucl  | 23367.00 | LARP1    | 1327.00 | 3.01  | 0.56 |
| 50055.00 P13 | M-014021- zinc finger, | 23352.00 | ZUBR1    | 1837.00 | 2.23  | 0.22 |
| 50055.00 P14 | M-025319- KIAA0895 p   | 23366.00 | KIAA0895 | 3817.00 | 2.07  | 0.38 |
| 50055.00 P15 | M-025277- unc-84 hon   | 23353.00 | UNC84A   | 2971.00 | 1.88  | 0.57 |
| 50055.00 P16 | M-023133- obscurin-lil | 23363.00 | OBSL1    | 3546.00 | 0.39  | 2.06 |
| 50055.00 P17 | M-023648- KIAA0841     | 23354.00 | KIAA0841 | 1406.00 | 2.85  | 0.40 |
| 50055.00 P18 | M-014030- pleckstrin a | 23362.00 | PSD3     | 2329.00 | 2.58  | 0.13 |
| 50055.00 P19 | M-023668- vacuolar pr  | 23355.00 | VPS8     | 3682.00 | 2.06  | 0.39 |
| 50055.00 P20 | M-022810- zinc finger  | 23361.00 | ZNF629   | 2254.00 | 0.93  | 1.52 |
| 50055.00 P21 | M-014041- angel homc   | 23357.00 | ANGEL1   | 3640.00 | 1.46  | 0.99 |
| 50055.00 P23 | M-014029- formin binc  | 23360.00 | FNBP4    | 1317.00 | 2.13  | 0.32 |
|              |                        |          | mdn      | 2911.50 | 2.45  | 0.93 |
|              |                        |          | 3xMAD    |         |       | 2.79 |
|              |                        |          | MADc     |         |       | 1.38 |
| 50055.00 C22 |                        |          |          | 2995.00 | 14.42 |      |
| 50055.00 D22 |                        |          |          | 4108.00 | 13.66 |      |
| 50055.00 E22 | 2940.00                | 9.39     | 3143.00  | 7.76    |       |      |
| 50055.00 F22 |                        |          |          | 3613.00 | 18.21 |      |
|              |                        |          | mn       | 3572.00 | 15.43 |      |

|              |                                   |         |           |         |       |
|--------------|-----------------------------------|---------|-----------|---------|-------|
|              |                                   |         | sd        | 557.63  | 2.44  |
| 50055.00 G22 |                                   |         |           | 2026.00 | 1.97  |
| 50055.00 H22 |                                   |         |           | 2199.00 | 1.00  |
| 50055.00 I22 |                                   |         |           | 1718.00 | 1.22  |
| 50055.00 J22 |                                   |         |           | 1767.00 | 3.11  |
|              |                                   |         | mn        | 1894.67 | 1.78  |
|              |                                   |         | sd        | 264.70  | 1.16  |
|              |                                   |         | 3psSD     |         | 7.32  |
|              |                                   |         | 3ngSD     |         | 3.48  |
|              |                                   |         | SumSD     |         | 10.80 |
|              |                                   |         | DiffMn    |         | 13.65 |
|              |                                   |         | SmovrDiff |         | 0.79  |
|              |                                   |         | 1minus    |         | 0.21  |
| 50055.00 G03 | M-003290- polo-like ki            | 5347.00 | PLK1 SMAR | 298.00  | 5.37  |
| 50055.00 H03 | M-003290- polo-like ki            | 5347.00 | PLK1 SMAR | 286.00  | 9.09  |
| 50055.00 I03 | D-001206-:siControl non-targeting |         |           | 2980.00 | 1.58  |
| 50055.00 J03 | D-001206-:siControl non-targeting |         |           | 3096.00 | 2.42  |
| 50055.00 K03 | D-001600-(siGLO RISC-free siRNA   |         |           | 5446.00 | 8.78  |
| 50055.00 L03 | D-001600-(siGLO RISC-free siRNA   |         |           | 5486.00 | 4.01  |

| rZ    | Cell Count | % inf | Abs Dev | rZ    | Cell Count | % inf | Abs Dev | rZ    |
|-------|------------|-------|---------|-------|------------|-------|---------|-------|
| -0.46 | 3021.00    | 1.46  | 4.06    | -0.07 | 3776.00    | 2.17  | 0.35    | -0.22 |
| 0.45  | 2335.00    | 1.84  | 3.68    | 0.00  | 2745.00    | 1.79  | 0.73    | -0.46 |
| 3.76  | 3198.00    | 9.38  | 3.86    | 1.38  | 4199.00    | 12.57 | 10.05   | 6.21  |
| 0.17  | 2762.00    | 1.92  | 3.60    | 0.01  | 2700.00    | 2.67  | 0.15    | 0.09  |
| 0.24  | 2242.00    | 2.68  | 2.84    | 0.15  | 2943.00    | 2.00  | 0.52    | -0.32 |
| 0.47  | 2417.00    | 1.74  | 3.78    | -0.02 | 2486.00    | 2.98  | 0.46    | 0.28  |
| -0.08 | 2930.00    | 0.85  | 4.67    | -0.18 | 3141.00    | 1.78  | 0.74    | -0.46 |
| 0.56  | 1728.00    | 1.97  | 3.55    | 0.02  | 2556.00    | 1.80  | 0.72    | -0.45 |
| -0.01 | 1711.00    | 0.64  | 4.88    | -0.22 | 2780.00    | 1.33  | 1.19    | -0.74 |
| 1.75  | 2048.00    | 4.30  | 1.22    | 0.45  | 2944.00    | 3.87  | 1.35    | 0.83  |
| -0.38 | 1806.00    | 1.72  | 3.80    | -0.02 | 3442.00    | 2.91  | 0.39    | 0.24  |
| -0.13 | 2849.00    | 0.98  | 4.54    | -0.16 | 2542.00    | 2.01  | 0.51    | -0.32 |
| 1.74  | 921.00     | 3.15  | 2.37    | 0.24  | 1371.00    | 6.64  | 4.12    | 2.54  |
| 1.28  | 2622.00    | 1.75  | 3.77    | -0.02 | 2467.00    | 2.72  | 0.20    | 0.12  |
| 1.32  | 1767.00    | 4.02  | 1.50    | 0.40  | 2109.00    | 2.80  | 0.28    | 0.17  |
| 1.18  | 1553.00    | 3.28  | 2.24    | 0.26  | 1820.00    | 1.70  | 0.82    | -0.51 |
| 1.00  | 2756.00    | 1.52  | 4.00    | -0.06 | 2288.00    | 5.42  | 2.90    | 1.79  |
| -0.24 | 1622.00    | 5.36  | 0.16    | 0.64  | 2107.00    | 2.85  | 0.33    | 0.20  |
| 0.31  | 1595.00    | 5.45  | 0.07    | 0.66  | 1570.00    | 5.73  | 3.21    | 1.98  |
| 2.12  | 778.00     | 7.46  | 1.94    | 1.03  | 1680.00    | 2.92  | 0.40    | 0.24  |
| -0.69 | 3706.00    | 1.51  | 4.01    | -0.06 | 2832.00    | 2.79  | 0.27    | 0.16  |
| -1.16 | 2379.00    | 0.59  | 4.93    | -0.23 | 2872.00    | 1.25  | 1.27    | -0.78 |
| -1.42 | 2688.00    | 0.56  | 4.96    | -0.23 | 2670.00    | 2.25  | 0.27    | -0.17 |
| -1.58 | 3650.00    | 2.11  | 3.41    | 0.05  | 4025.00    | 2.31  | 0.21    | -0.13 |
| 0.83  | 5190.00    | 2.14  | 3.38    | 0.05  | 4754.00    | 10.37 | 7.85    | 4.85  |
| -0.75 | 2632.00    | 1.79  | 3.73    | -0.01 | 2324.00    | 0.99  | 1.53    | -0.95 |
| -1.09 | 5137.00    | 2.22  | 3.30    | 0.07  | 3826.00    | 2.93  | 0.41    | 0.25  |
| -1.43 | 3496.00    | 1.03  | 4.49    | -0.15 | 3625.00    | 1.93  | 0.59    | -0.37 |
| -0.10 | 2875.00    | 3.69  | 1.83    | 0.34  | 2738.00    | 4.78  | 2.26    | 1.40  |
| 0.23  | 2762.00    | 1.48  | 4.04    | -0.06 | 3706.00    | 3.53  | 1.01    | 0.62  |
| -0.71 | 2556.00    | 1.06  | 4.46    | -0.14 | 3032.00    | 2.37  | 0.15    | -0.09 |
| -1.04 | 1865.00    | 0.16  | 5.36    | -0.31 | 2814.00    | 1.21  | 1.31    | -0.81 |
| 0.72  | 4038.00    | 3.27  | 2.25    | 0.26  | 2802.00    | 1.93  | 0.59    | -0.37 |
| -0.16 | 3542.00    | 1.10  | 4.42    | -0.13 | 3445.00    | 5.02  | 2.50    | 1.54  |
| -0.50 | 3231.00    | 0.71  | 4.81    | -0.21 | 2422.00    | 1.98  | 0.54    | -0.33 |
| 1.89  | 4822.00    | 1.06  | 4.46    | -0.14 | 4412.00    | 1.99  | 0.53    | -0.33 |
| -0.99 | 3218.00    | 1.49  | 4.03    | -0.06 | 2299.00    | 1.48  | 1.04    | -0.65 |
| 1.52  | 5077.00    | 4.51  | 1.01    | 0.49  | 4350.00    | 4.30  | 1.78    | 1.10  |
| -1.04 | 2615.00    | 0.08  | 5.44    | -0.32 | 2781.00    | 0.90  | 1.62    | -1.00 |
| 2.70  | 1380.00    | 1.59  | 3.93    | -0.04 | 3133.00    | 3.89  | 1.37    | 0.85  |
| 0.34  | 2715.00    | 0.41  | 5.11    | -0.26 | 2570.00    | 0.31  | 2.21    | -1.37 |
| -0.51 | 2128.00    | 2.26  | 3.26    | 0.08  | 2559.00    | 0.74  | 1.78    | -1.10 |
| 0.29  | 3159.00    | 0.85  | 4.67    | -0.18 | 3243.00    | 2.62  | 0.10    | 0.06  |
| 0.24  | 4402.00    | 2.18  | 3.34    | 0.06  | 4072.00    | 1.50  | 1.02    | -0.63 |
| 0.46  | 2801.00    | 3.32  | 2.20    | 0.27  | 2313.00    | 0.95  | 1.57    | -0.97 |
| 0.83  | 4011.00    | 4.21  | 1.31    | 0.43  | 2970.00    | 3.74  | 1.22    | 0.75  |

|       |         |      |      |       |         |      |      |       |
|-------|---------|------|------|-------|---------|------|------|-------|
| -1.39 | 2669.00 | 1.54 | 3.98 | -0.06 | 1497.00 | 0.20 | 2.32 | -1.43 |
| 0.79  | 3714.00 | 5.71 | 0.19 | 0.71  | 3227.00 | 2.85 | 0.33 | 0.20  |
| 0.27  | 3137.00 | 1.15 | 4.37 | -0.13 | 2963.00 | 1.62 | 0.90 | -0.56 |
| -0.32 | 3234.00 | 1.98 | 3.54 | 0.03  | 2999.00 | 1.23 | 1.29 | -0.80 |
| -0.02 | 1974.00 | 1.93 | 3.60 | 0.02  | 2260.00 | 1.86 | 0.66 | -0.41 |
| -0.33 | 1692.00 | 1.54 | 3.98 | -0.06 | 1769.00 | 0.79 | 1.73 | -1.07 |
| 1.97  | 3039.00 | 3.52 | 2.00 | 0.31  | 3259.00 | 1.41 | 1.11 | -0.69 |
| -0.24 | 2215.00 | 3.43 | 2.09 | 0.29  | 2054.00 | 0.78 | 1.74 | -1.08 |
| -0.52 | 3578.00 | 2.46 | 3.06 | 0.11  | 3119.00 | 0.67 | 1.85 | -1.14 |
| 0.13  | 2094.00 | 2.91 | 2.61 | 0.20  | 2402.00 | 1.17 | 1.35 | -0.84 |
| 0.34  | 3006.00 | 4.22 | 1.30 | 0.44  | 2407.00 | 3.16 | 0.64 | 0.39  |
| 0.02  | 2872.00 | 2.44 | 3.08 | 0.11  | 3754.00 | 0.43 | 2.09 | -1.30 |
| -0.65 | 631.00  | 2.54 | 2.98 | 0.13  | 1690.00 | 0.41 | 2.11 | -1.30 |
| -1.00 | 1969.00 | 1.78 | 3.74 | -0.01 | 3956.00 | 0.68 | 1.84 | -1.14 |
| 2.72  | 4875.00 | 1.70 | 3.82 | -0.02 | 5000.00 | 4.52 | 2.00 | 1.23  |
| -0.38 | 2559.00 | 2.81 | 2.71 | 0.18  | 3431.00 | 4.14 | 1.62 | 1.00  |
| 0.14  | 2840.00 | 2.50 | 3.02 | 0.12  | 3312.00 | 2.11 | 0.41 | -0.25 |
| 1.02  | 3323.00 | 1.11 | 4.41 | -0.13 | 2694.00 | 3.53 | 1.01 | 0.62  |
| -0.05 | 3688.00 | 1.36 | 4.16 | -0.09 | 2685.00 | 0.89 | 1.63 | -1.01 |
| -0.88 | 3627.00 | 1.46 | 4.06 | -0.07 | 3382.00 | 2.31 | 0.21 | -0.13 |
| 0.13  | 3410.00 | 1.23 | 4.29 | -0.11 | 1915.00 | 2.51 | 0.01 | -0.01 |
| 3.82  | 3550.00 | 5.21 | 0.31 | 0.62  | 3752.00 | 4.64 | 2.12 | 1.31  |
| 0.28  | 4113.00 | 2.87 | 2.65 | 0.19  | 3044.00 | 2.20 | 0.32 | -0.20 |
| -0.33 | 2095.00 | 2.67 | 2.85 | 0.15  | 1660.00 | 2.89 | 0.37 | 0.23  |
| -0.44 | 1894.00 | 1.43 | 4.09 | -0.08 | 2065.00 | 2.03 | 0.49 | -0.30 |
| -0.74 | 3398.00 | 2.83 | 2.69 | 0.18  | 2211.00 | 2.04 | 0.48 | -0.30 |
| -0.92 | 2551.00 | 1.33 | 4.19 | -0.09 | 2136.00 | 1.69 | 0.83 | -0.52 |
| 3.24  | 3079.00 | 7.11 | 1.59 | 0.96  | 2494.00 | 8.50 | 5.98 | 3.69  |
| 0.44  | 2242.00 | 4.01 | 1.51 | 0.40  | 1675.00 | 0.90 | 1.62 | -1.01 |
| 0.93  | 3047.00 | 1.77 | 3.75 | -0.01 | 3569.00 | 1.26 | 1.26 | -0.78 |
| 1.20  | 4791.00 | 3.26 | 2.26 | 0.26  | 4566.00 | 4.86 | 2.34 | 1.44  |
| -0.86 | 4294.00 | 2.12 | 3.40 | 0.05  | 3985.00 | 1.88 | 0.64 | -0.40 |
| 1.77  | 2978.00 | 2.42 | 3.10 | 0.11  | 3803.00 | 3.92 | 1.40 | 0.86  |
| -0.14 | 2394.00 | 2.59 | 2.93 | 0.14  | 4105.00 | 3.61 | 1.09 | 0.67  |
| 2.58  | 4677.00 | 3.36 | 2.16 | 0.28  | 4195.00 | 4.31 | 1.79 | 1.11  |
| 1.28  | 2111.00 | 6.68 | 1.16 | 0.88  | 816.00  | 3.68 | 1.16 | 0.71  |
| 0.24  | 1138.00 | 3.08 | 2.44 | 0.23  | 1538.00 | 1.82 | 0.70 | -0.43 |
| 4.02  | 2997.00 | 1.50 | 4.02 | -0.06 | 3380.00 | 5.62 | 3.10 | 1.91  |
| -0.40 | 3635.00 | 0.83 | 4.69 | -0.18 | 3786.00 | 1.06 | 1.46 | -0.91 |
| 0.56  | 2674.00 | 2.62 | 2.90 | 0.14  | 2833.00 | 4.45 | 1.93 | 1.19  |
| 3.21  | 2972.00 | 2.22 | 3.30 | 0.07  | 2600.00 | 2.96 | 0.44 | 0.27  |
| 2.06  | 4043.00 | 2.18 | 3.34 | 0.06  | 3731.00 | 2.52 | 0.00 | 0.00  |
| 0.08  | 4186.00 | 2.05 | 3.47 | 0.04  | 2551.00 | 1.65 | 0.87 | -0.54 |
| 0.07  | 3513.00 | 1.45 | 4.07 | -0.07 | 3125.00 | 0.93 | 1.59 | -0.99 |
| -0.06 | 2866.00 | 0.24 | 5.28 | -0.29 | 2329.00 | 2.15 | 0.37 | -0.23 |
| 1.86  | 3061.00 | 2.74 | 2.78 | 0.17  | 2576.00 | 2.41 | 0.11 | -0.07 |
| 1.98  | 2131.00 | 2.25 | 3.27 | 0.08  | 2483.00 | 1.33 | 1.19 | -0.74 |

|       |         |      |      |       |         |      |      |       |
|-------|---------|------|------|-------|---------|------|------|-------|
| -0.27 | 2993.00 | 0.20 | 5.32 | -0.30 | 3173.00 | 1.64 | 0.88 | -0.55 |
| 1.80  | 2164.00 | 0.05 | 5.47 | -0.33 | 2209.00 | 2.67 | 0.15 | 0.09  |
| 1.06  | 2811.00 | 0.25 | 5.27 | -0.29 | 2700.00 | 2.15 | 0.37 | -0.23 |
| -0.60 | 3432.00 | 0.79 | 4.73 | -0.19 | 2852.00 | 1.72 | 0.80 | -0.50 |
| 0.80  | 4274.00 | 2.74 | 2.78 | 0.16  | 2961.00 | 1.86 | 0.66 | -0.41 |
| -1.11 | 3516.00 | 0.26 | 5.26 | -0.29 | 3071.00 | 1.50 | 1.02 | -0.63 |
| -0.62 | 4368.00 | 1.10 | 4.42 | -0.14 | 5010.00 | 2.59 | 0.07 | 0.04  |
| 0.88  | 4918.00 | 4.86 | 0.66 | 0.55  | 4768.00 | 0.61 | 1.91 | -1.18 |
| 1.58  | 5221.00 | 3.43 | 2.09 | 0.29  | 3248.00 | 2.99 | 0.47 | 0.29  |
| -0.63 | 3568.00 | 1.49 | 4.03 | -0.06 | 2403.00 | 1.62 | 0.90 | -0.56 |
| 1.25  | 3529.00 | 1.13 | 4.39 | -0.13 | 3078.00 | 0.78 | 1.74 | -1.08 |
| 1.90  | 4202.00 | 2.02 | 3.50 | 0.03  | 2842.00 | 0.49 | 2.03 | -1.25 |
| 0.68  | 2806.00 | 2.35 | 3.17 | 0.09  | 1965.00 | 1.17 | 1.35 | -0.84 |
| 0.26  | 3600.00 | 2.67 | 2.85 | 0.15  | 3184.00 | 2.20 | 0.32 | -0.20 |
| 3.10  | 3182.00 | 8.55 | 3.03 | 1.22  | 3031.00 | 3.63 | 1.11 | 0.68  |
| 0.63  | 2928.00 | 3.52 | 2.00 | 0.31  | 2529.00 | 0.99 | 1.53 | -0.95 |
| 0.73  | 2568.00 | 1.91 | 3.61 | 0.01  | 2220.00 | 1.49 | 1.03 | -0.64 |
| 1.69  | 3472.00 | 2.36 | 3.16 | 0.10  | 2763.00 | 0.47 | 2.05 | -1.27 |
| 3.38  | 1794.00 | 4.63 | 0.89 | 0.51  | 1472.00 | 0.88 | 1.64 | -1.01 |
| 0.44  | 3511.00 | 3.53 | 1.99 | 0.31  | 3052.00 | 1.25 | 1.27 | -0.79 |
| -0.97 | 1240.00 | 3.39 | 2.13 | 0.28  | 1211.00 | 0.58 | 1.94 | -1.20 |
| 3.58  | 1375.00 | 2.84 | 2.68 | 0.18  | 1390.00 | 1.08 | 1.44 | -0.89 |
| 1.59  | 4158.00 | 2.28 | 3.24 | 0.08  | 3750.00 | 2.69 | 0.17 | 0.10  |
| 1.15  | 3576.00 | 2.43 | 3.09 | 0.11  | 3092.00 | 0.91 | 1.61 | -1.00 |
| -0.28 | 3072.00 | 3.45 | 2.07 | 0.29  | 2579.00 | 3.02 | 0.50 | 0.31  |
| 0.23  | 2659.00 | 2.41 | 3.11 | 0.10  | 3770.00 | 0.93 | 1.59 | -0.99 |
| 1.34  | 2716.00 | 3.31 | 2.21 | 0.27  | 3974.00 | 2.74 | 0.22 | 0.14  |
| 0.40  | 4781.00 | 3.70 | 1.82 | 0.34  | 4424.00 | 2.37 | 0.15 | -0.09 |
| 2.14  | 3503.00 | 2.14 | 3.38 | 0.06  | 4432.00 | 4.78 | 2.26 | 1.40  |
| 1.41  | 3667.00 | 2.40 | 3.12 | 0.10  | 3427.00 | 4.23 | 1.71 | 1.05  |
| -0.91 | 2747.00 | 2.48 | 3.04 | 0.12  | 2536.00 | 3.12 | 0.60 | 0.37  |
| 0.26  | 4289.00 | 1.45 | 4.07 | -0.07 | 4229.00 | 4.23 | 1.71 | 1.06  |
| -1.02 | 2316.00 | 2.42 | 3.10 | 0.11  | 2964.00 | 5.97 | 3.45 | 2.13  |
| 1.71  | 2996.00 | 2.37 | 3.15 | 0.10  | 2395.00 | 1.38 | 1.14 | -0.71 |
| -0.32 | 3886.00 | 1.24 | 4.28 | -0.11 | 2864.00 | 2.23 | 0.29 | -0.18 |
| -0.16 | 2770.00 | 1.26 | 4.26 | -0.10 | 1926.00 | 4.26 | 1.74 | 1.07  |
| -0.29 | 3398.00 | 3.88 | 1.64 | 0.37  | 3148.00 | 5.21 | 2.69 | 1.66  |
| -0.68 | 2422.00 | 3.67 | 1.85 | 0.34  | 2746.00 | 3.46 | 0.94 | 0.58  |
| -1.12 | 1899.00 | 3.63 | 1.89 | 0.33  | 2246.00 | 2.85 | 0.33 | 0.20  |
| 0.97  | 2237.00 | 0.89 | 4.63 | -0.17 | 1990.00 | 2.16 | 0.36 | -0.22 |
| -0.31 | 3092.00 | 1.94 | 3.58 | 0.02  | 2371.00 | 1.39 | 1.13 | -0.70 |
| -0.41 | 3855.00 | 1.63 | 3.89 | -0.04 | 3484.00 | 3.36 | 0.84 | 0.52  |
| -0.01 | 2463.00 | 1.87 | 3.65 | 0.01  | 3248.00 | 4.31 | 1.79 | 1.10  |
| -0.49 | 3179.00 | 1.67 | 3.85 | -0.03 | 3275.00 | 6.99 | 4.47 | 2.76  |
| 0.18  | 5366.00 | 3.43 | 2.09 | 0.29  | 6240.00 | 5.18 | 2.66 | 1.64  |
| 0.76  | 3302.00 | 1.33 | 4.19 | -0.09 | 5149.00 | 6.08 | 3.56 | 2.20  |
| 1.74  | 3263.00 | 1.78 | 3.74 | -0.01 | 4665.00 | 2.55 | 0.03 | 0.02  |

|       |         |       |      |       |         |      |      |       |
|-------|---------|-------|------|-------|---------|------|------|-------|
| -0.38 | 4056.00 | 1.33  | 4.19 | -0.09 | 4285.00 | 0.40 | 2.12 | -1.31 |
| -1.09 | 3078.00 | 0.71  | 4.81 | -0.21 | 3232.00 | 3.77 | 1.25 | 0.77  |
| 0.27  | 3201.00 | 1.97  | 3.55 | 0.02  | 3313.00 | 1.96 | 0.56 | -0.35 |
| 0.16  | 2956.00 | 2.03  | 3.49 | 0.03  | 3811.00 | 4.22 | 1.70 | 1.05  |
| -0.45 | 2373.00 | 3.24  | 2.28 | 0.26  | 3598.00 | 1.97 | 0.55 | -0.34 |
| -0.47 | 2132.00 | 2.16  | 3.36 | 0.06  | 1849.00 | 2.97 | 0.45 | 0.28  |
| -0.44 | 2595.00 | 0.96  | 4.56 | -0.16 | 1921.00 | 2.03 | 0.49 | -0.30 |
| 0.55  | 673.00  | 7.13  | 1.61 | 0.97  | 671.00  | 1.64 | 0.88 | -0.55 |
| -0.61 | 2835.00 | 2.15  | 3.37 | 0.06  | 1962.00 | 0.82 | 1.70 | -1.05 |
| 0.16  | 1032.00 | 3.68  | 1.84 | 0.34  | 1174.00 | 1.96 | 0.56 | -0.35 |
| -0.57 | 2514.00 | 1.63  | 3.89 | -0.04 | 2036.00 | 1.62 | 0.90 | -0.56 |
| -0.93 | 3626.00 | 1.74  | 3.78 | -0.02 | 3464.00 | 2.25 | 0.27 | -0.17 |
| -0.35 | 2025.00 | 1.48  | 4.04 | -0.07 | 1536.00 | 4.49 | 1.97 | 1.22  |
| -0.79 | 1233.00 | 1.54  | 3.98 | -0.05 | 1519.00 | 3.23 | 0.71 | 0.43  |
| -0.31 | 2322.00 | 2.89  | 2.63 | 0.19  | 3261.00 | 2.02 | 0.50 | -0.31 |
| 1.14  | 1823.00 | 3.68  | 1.84 | 0.34  | 2984.00 | 5.03 | 2.51 | 1.55  |
| -0.06 | 3474.00 | 3.83  | 1.69 | 0.36  | 3346.00 | 1.85 | 0.67 | -0.41 |
| -0.97 | 2916.00 | 1.20  | 4.32 | -0.12 | 3180.00 | 1.07 | 1.45 | -0.90 |
| 0.85  | 2740.00 | 4.34  | 1.18 | 0.46  | 3937.00 | 5.21 | 2.69 | 1.66  |
| 2.87  | 1939.00 | 1.55  | 3.97 | -0.05 | 3173.00 | 1.29 | 1.23 | -0.76 |
| -1.10 | 4063.00 | 1.40  | 4.12 | -0.08 | 4350.00 | 2.99 | 0.47 | 0.29  |
| -0.56 | 1565.00 | 1.60  | 3.92 | -0.04 | 2448.00 | 6.86 | 4.34 | 2.68  |
| 0.68  | 1546.00 | 1.03  | 4.49 | -0.15 | 1915.00 | 1.62 | 0.90 | -0.56 |
| -0.57 | 1434.00 | 2.93  | 2.59 | 0.20  | 2461.00 | 3.37 | 0.85 | 0.52  |
| -1.52 | 1429.00 | 1.82  | 3.70 | 0.00  | 2439.00 | 3.12 | 0.60 | 0.37  |
| 0.01  | 1623.00 | 1.85  | 3.67 | 0.00  | 3356.00 | 2.38 | 0.14 | -0.09 |
| 1.13  | 1977.00 | 4.91  | 0.61 | 0.56  | 2232.00 | 3.32 | 0.80 | 0.49  |
| 1.43  | 1621.00 | 2.96  | 2.56 | 0.20  | 2726.00 | 2.46 | 0.06 | -0.04 |
| 1.35  | 2442.00 | 2.54  | 2.98 | 0.13  | 2118.00 | 3.40 | 0.88 | 0.54  |
| -1.26 | 784.00  | 3.70  | 1.82 | 0.34  | 1671.00 | 2.69 | 0.17 | 0.10  |
| 0.58  | 1060.00 | 6.60  | 1.08 | 0.87  | 1966.00 | 3.61 | 1.09 | 0.67  |
| -0.71 | 2641.00 | 1.02  | 4.50 | -0.15 | 3128.00 | 1.12 | 1.40 | -0.87 |
| 1.85  | 1264.00 | 5.62  | 0.10 | 0.69  | 2052.00 | 3.12 | 0.60 | 0.37  |
| -1.50 | 1421.00 | 1.90  | 3.62 | 0.01  | 2238.00 | 1.47 | 1.05 | -0.65 |
| -0.75 | 1085.00 | 2.40  | 3.12 | 0.10  | 1960.00 | 1.79 | 0.73 | -0.46 |
| 1.85  | 616.00  | 12.66 | 7.14 | 1.98  | 889.00  | 5.62 | 3.10 | 1.92  |
| 2.48  | 1260.00 | 6.11  | 0.59 | 0.78  | 2237.00 | 2.73 | 0.21 | 0.13  |
| -0.90 | 1989.00 | 2.46  | 3.06 | 0.11  | 3091.00 | 2.43 | 0.09 | -0.06 |
| 2.36  | 2520.00 | 3.81  | 1.71 | 0.36  | 3577.00 | 4.14 | 1.62 | 1.00  |
| -1.26 | 1186.00 | 3.54  | 1.98 | 0.31  | 3513.00 | 1.96 | 0.56 | -0.35 |
| -1.16 | 4227.00 | 0.52  | 5.00 | -0.24 | 4296.00 | 3.75 | 1.23 | 0.76  |
| -0.66 | 1641.00 | 0.12  | 5.40 | -0.31 | 3246.00 | 2.25 | 0.27 | -0.17 |
| 0.18  | 2602.00 | 0.92  | 4.60 | -0.17 | 2540.00 | 1.57 | 0.95 | -0.59 |
| 0.75  | 1337.00 | 0.37  | 5.15 | -0.27 | 1308.00 | 1.76 | 0.76 | -0.47 |
| 1.40  | 1803.00 | 2.00  | 3.52 | 0.03  | 1713.00 | 5.66 | 3.14 | 1.94  |
| 1.47  | 2500.00 | 2.56  | 2.96 | 0.13  | 3260.00 | 3.74 | 1.22 | 0.75  |
| -0.78 | 2123.00 | 0.61  | 4.91 | -0.22 | 2438.00 | 1.72 | 0.80 | -0.49 |



|       |         |      |      |       |         |       |       |       |
|-------|---------|------|------|-------|---------|-------|-------|-------|
| 1.84  | 3090.00 | 2.07 | 3.45 | 0.04  | 3162.00 | 7.62  | 5.10  | 3.15  |
| -0.33 | 1436.00 | 1.81 | 3.71 | -0.01 | 1599.00 | 1.19  | 1.33  | -0.82 |
| 1.52  | 1976.00 | 2.02 | 3.50 | 0.03  | 3496.00 | 5.61  | 3.09  | 1.90  |
| -0.64 | 1891.00 | 1.37 | 4.15 | -0.08 | 3122.00 | 1.03  | 1.50  | -0.93 |
| -0.36 | 1651.00 | 1.51 | 4.01 | -0.06 | 2054.00 | 6.91  | 4.39  | 2.71  |
| -0.37 | 1715.00 | 1.22 | 4.30 | -0.11 | 2588.00 | 3.36  | 0.84  | 0.52  |
| -0.02 | 1223.00 | 1.23 | 4.29 | -0.11 | 2183.00 | 1.88  | 0.64  | -0.40 |
| -0.32 | 683.00  | 0.88 | 4.64 | -0.18 | 1980.00 | 4.60  | 2.08  | 1.28  |
| -0.24 | 723.00  | 0.83 | 4.69 | -0.18 | 2240.00 | 5.63  | 3.11  | 1.92  |
| -0.54 | 2366.00 | 0.21 | 5.31 | -0.30 | 3065.00 | 3.95  | 1.43  | 0.88  |
| -0.21 | 1730.00 | 1.68 | 3.84 | -0.03 | 1897.00 | 4.38  | 1.86  | 1.14  |
| -0.35 | 1327.00 | 0.38 | 5.14 | -0.27 | 1471.00 | 3.40  | 0.88  | 0.54  |
| -0.94 | 1057.00 | 0.85 | 4.67 | -0.18 | 3001.00 | 2.80  | 0.28  | 0.17  |
| 1.28  | 3551.00 | 1.69 | 3.83 | -0.03 | 4129.00 | 1.43  | 1.09  | -0.68 |
| 0.32  | 2871.00 | 2.16 | 3.36 | 0.06  | 3733.00 | 3.05  | 0.53  | 0.33  |
| -0.82 | 2158.00 | 1.90 | 3.62 | 0.01  | 2535.00 | 1.62  | 0.90  | -0.56 |
| -0.53 | 2179.00 | 1.01 | 4.51 | -0.15 | 2108.00 | 1.76  | 0.76  | -0.47 |
| -0.02 | 2234.00 | 4.70 | 0.82 | 0.52  | 4120.00 | 5.29  | 2.77  | 1.71  |
| 0.07  | 2739.00 | 2.67 | 2.85 | 0.15  | 3859.00 | 2.38  | 0.14  | -0.09 |
| -0.05 | 1960.00 | 1.28 | 4.24 | -0.10 | 2267.00 | 1.99  | 0.54  | -0.33 |
| 0.35  | 2062.00 | 1.45 | 4.07 | -0.07 | 2970.00 | 1.11  | 1.41  | -0.87 |
| 0.19  | 1879.00 | 3.30 | 2.22 | 0.27  | 3069.00 | 0.42  | 2.10  | -1.30 |
| -0.40 | 3692.00 | 1.65 | 3.87 | -0.03 | 3714.00 | 1.02  | 1.50  | -0.93 |
| -0.17 | 1588.00 | 1.51 | 4.01 | -0.06 | 1596.00 | 0.88  | 1.64  | -1.02 |
| 1.54  | 3175.00 | 4.54 | 0.98 | 0.49  | 2506.00 | 4.11  | 1.59  | 0.98  |
| 0.88  | 2980.00 | 3.79 | 1.73 | 0.36  | 48.00   | 62.50 | 59.98 | 37.05 |
| 0.39  | 1632.00 | 2.57 | 2.95 | 0.13  | 2797.00 | 1.14  | 1.38  | -0.85 |
| 1.26  | 2058.00 | 1.12 | 4.40 | -0.13 | 2666.00 | 2.63  | 0.11  | 0.06  |
| 1.23  | 2250.00 | 3.11 | 2.41 | 0.23  | 4475.00 | 5.32  | 2.80  | 1.73  |
| 0.31  | 2778.00 | 2.99 | 2.53 | 0.21  | 2106.00 | 0.95  | 1.57  | -0.97 |
| -0.50 | 1058.00 | 1.23 | 4.29 | -0.11 | 1932.00 | 3.83  | 1.31  | 0.81  |
| 1.41  | 2383.00 | 1.89 | 3.63 | 0.01  | 3284.00 | 2.53  | 0.01  | 0.00  |
| 1.33  | 2100.00 | 2.19 | 3.33 | 0.06  | 3701.00 | 1.00  | 1.52  | -0.94 |
| 0.03  | 2809.00 | 0.89 | 4.63 | -0.17 | 3671.00 | 1.85  | 0.67  | -0.41 |
| 0.67  | 3269.00 | 1.62 | 3.90 | -0.04 | 4587.00 | 3.05  | 0.53  | 0.33  |
| 0.05  | 3832.00 | 1.20 | 4.32 | -0.12 | 4628.00 | 3.98  | 1.46  | 0.90  |
| -0.13 | 3269.00 | 2.78 | 2.74 | 0.17  | 3447.00 | 3.66  | 1.14  | 0.70  |
| 3.12  | 2498.00 | 3.76 | 1.76 | 0.35  | 4331.00 | 12.72 | 10.20 | 6.30  |
| 4.80  | 804.00  | 5.60 | 0.08 | 0.69  | 1297.00 | 9.10  | 6.58  | 4.06  |
| -0.52 | 1784.00 | 0.62 | 4.90 | -0.22 | 2421.00 | 2.52  | 0.00  | 0.00  |
| -1.07 | 2866.00 | 2.51 | 3.01 | 0.12  | 2810.00 | 3.52  | 1.00  | 0.62  |
| -0.23 | 1594.00 | 1.88 | 3.64 | 0.01  | 1767.00 | 3.28  | 0.76  | 0.47  |
| -0.55 | 3375.00 | 2.46 | 3.06 | 0.11  | 4198.00 | 3.14  | 0.62  | 0.38  |
| -0.68 | 1917.00 | 0.52 | 5.00 | -0.24 | 1456.00 | 3.64  | 1.12  | 0.69  |
| -1.01 | 1542.00 | 0.78 | 4.74 | -0.19 | 1743.00 | 2.81  | 0.29  | 0.18  |
| 0.14  | 1756.00 | 0.11 | 5.41 | -0.31 | 2682.00 | 2.13  | 0.39  | -0.25 |
| 0.99  | 2759.00 | 2.07 | 3.45 | 0.04  | 3177.00 | 3.53  | 1.01  | 0.62  |

|       |         |      |      |       |         |       |       |       |
|-------|---------|------|------|-------|---------|-------|-------|-------|
| -0.09 | 2512.00 | 2.03 | 3.49 | 0.03  | 3029.00 | 4.19  | 1.67  | 1.03  |
| -1.00 | 3621.00 | 1.55 | 3.97 | -0.05 | 4516.00 | 1.62  | 0.90  | -0.56 |
| -0.53 | 3098.00 | 0.87 | 4.65 | -0.18 | 4182.00 | 1.08  | 1.44  | -0.89 |
| -0.19 | 2921.00 | 0.34 | 5.18 | -0.27 | 3042.00 | 2.33  | 0.19  | -0.12 |
| -0.16 | 2998.00 | 0.40 | 5.12 | -0.26 | 2543.00 | 0.63  | 1.89  | -1.17 |
| -0.57 | 2896.00 | 1.24 | 4.28 | -0.11 | 3986.00 | 3.14  | 0.62  | 0.38  |
| -0.72 | 3370.00 | 0.89 | 4.63 | -0.17 | 3051.00 | 2.06  | 0.46  | -0.28 |
| -0.27 | 2684.00 | 3.02 | 2.50 | 0.22  | 4012.00 | 5.58  | 3.06  | 1.89  |
| -1.22 | 3050.00 | 1.34 | 4.18 | -0.09 | 3884.00 | 1.78  | 0.74  | -0.46 |
| 0.15  | 2855.00 | 1.37 | 4.15 | -0.09 | 3820.00 | 4.74  | 2.22  | 1.37  |
| 1.58  | 2098.00 | 0.86 | 4.66 | -0.18 | 3949.00 | 3.14  | 0.62  | 0.38  |
| -1.45 | 1669.00 | 1.26 | 4.26 | -0.11 | 2455.00 | 4.03  | 1.51  | 0.93  |
| -0.57 | 2230.00 | 0.36 | 5.16 | -0.27 | 3053.00 | 5.67  | 3.15  | 1.94  |
| 2.02  | 2421.00 | 0.70 | 4.82 | -0.21 | 2716.00 | 9.28  | 6.76  | 4.17  |
| 2.28  | 2272.00 | 4.71 | 0.81 | 0.52  | 2188.00 | 3.29  | 0.77  | 0.47  |
| 0.44  | 2595.00 | 1.00 | 4.52 | -0.15 | 2586.00 | 1.39  | 1.13  | -0.70 |
| 0.60  | 2042.00 | 3.43 | 2.09 | 0.29  | 1741.00 | 2.07  | 0.45  | -0.28 |
| 0.08  | 1963.00 | 0.56 | 4.96 | -0.23 | 2499.00 | 4.88  | 2.36  | 1.46  |
| -0.08 | 1379.00 | 0.58 | 4.94 | -0.23 | 1662.00 | 2.23  | 0.29  | -0.18 |
| -0.87 | 2491.00 | 0.36 | 5.16 | -0.27 | 2866.00 | 3.63  | 1.11  | 0.68  |
| -0.81 | 1105.00 | 0.27 | 5.25 | -0.29 | 2538.00 | 2.29  | 0.23  | -0.15 |
| -0.69 | 1630.00 | 0.43 | 5.09 | -0.26 | 2032.00 | 2.36  | 0.16  | -0.10 |
| 1.03  | 2115.00 | 1.99 | 3.53 | 0.03  | 2955.00 | 5.04  | 2.52  | 1.56  |
| -0.70 | 1843.00 | 0.87 | 4.65 | -0.18 | 1755.00 | 1.99  | 0.53  | -0.33 |
| -0.35 | 1927.00 | 0.67 | 4.85 | -0.21 | 1945.00 | 4.32  | 1.80  | 1.11  |
| -1.43 | 3339.00 | 0.45 | 5.07 | -0.25 | 1855.00 | 3.34  | 0.82  | 0.51  |
| 0.11  | 2232.00 | 0.27 | 5.25 | -0.29 | 3706.00 | 1.81  | 0.71  | -0.44 |
| 3.58  | 4847.00 | 1.44 | 4.08 | -0.07 | 5225.00 | 6.53  | 4.01  | 2.47  |
| -1.07 | 2031.00 | 0.15 | 5.37 | -0.31 | 3347.00 | 1.46  | 1.06  | -0.65 |
| 2.71  | 3439.00 | 0.87 | 4.65 | -0.18 | 4904.00 | 10.42 | 7.90  | 4.88  |
| 1.45  | 1700.00 | 0.88 | 4.64 | -0.17 | 3074.00 | 2.67  | 0.15  | 0.09  |
| 0.44  | 1515.00 | 2.71 | 2.81 | 0.16  | 2467.00 | 6.32  | 3.80  | 2.35  |
| -0.16 | 1827.00 | 0.66 | 4.86 | -0.22 | 2158.00 | 7.28  | 4.76  | 2.94  |
| -0.40 | 2441.00 | 0.98 | 4.54 | -0.16 | 2986.00 | 2.51  | 0.01  | -0.01 |
| 3.69  | 2445.00 | 2.82 | 2.70 | 0.18  | 2907.00 | 6.12  | 3.60  | 2.22  |
| -0.80 | 1816.00 | 3.14 | 2.38 | 0.24  | 1881.00 | 6.22  | 3.70  | 2.28  |
| -0.09 | 2361.00 | 0.34 | 5.18 | -0.27 | 3098.00 | 5.29  | 2.77  | 1.71  |
| -0.36 | 2173.00 | 0.97 | 4.55 | -0.16 | 4081.00 | 4.26  | 1.74  | 1.07  |
| 3.88  | 2274.00 | 4.13 | 1.39 | 0.42  | 3376.00 | 15.11 | 12.59 | 7.77  |
| -0.63 | 777.00  | 0.77 | 4.75 | -0.19 | 1869.00 | 4.65  | 2.13  | 1.32  |
| -0.52 | 1427.00 | 1.26 | 4.26 | -0.11 | 2825.00 | 2.97  | 0.45  | 0.28  |
| 2.64  | 2504.00 | 0.68 | 4.84 | -0.21 | 4039.00 | 7.43  | 4.91  | 3.03  |
| -0.54 | 3584.00 | 2.68 | 2.84 | 0.15  | 2752.00 | 7.01  | 4.49  | 2.77  |
| -0.14 | 1840.00 | 0.27 | 5.25 | -0.29 | 1913.00 | 3.76  | 1.24  | 0.77  |
| 1.75  | 1942.00 | 2.32 | 3.20 | 0.09  | 2543.00 | 2.75  | 0.23  | 0.14  |
| -0.67 | 2227.00 | 0.45 | 5.07 | -0.25 | 1523.00 | 10.83 | 8.31  | 5.13  |
| 2.79  | 3390.00 | 0.77 | 4.75 | -0.20 | 4606.00 | 2.78  | 0.26  | 0.16  |

|         |         |      |         |       |         |       |      |       |
|---------|---------|------|---------|-------|---------|-------|------|-------|
| -0.07   | 2036.00 | 1.82 | 3.70    | 0.00  | 2916.00 | 3.36  | 0.84 | 0.52  |
| 0.39    | 1861.00 | 1.99 | 3.53    | 0.03  | 2832.00 | 5.12  | 2.60 | 1.60  |
| 0.75    | 3761.00 | 3.67 | 1.85    | 0.33  | 3904.00 | 5.61  | 3.09 | 1.91  |
| 0.16    | 1929.00 | 0.73 | 4.79    | -0.20 | 3816.00 | 3.62  | 1.10 | 0.68  |
| 0.01    | 3339.00 | 1.41 | 4.11    | -0.08 | 3429.00 | 1.22  | 1.30 | -0.80 |
| 0.49    | 3083.00 | 1.30 | 4.22    | -0.10 | 2876.00 | 2.09  | 0.43 | -0.27 |
| -0.89   | 2220.00 | 0.59 | 4.93    | -0.23 | 2813.00 | 1.88  | 0.64 | -0.39 |
| 0.95    | 2530.00 | 1.46 | 4.06    | -0.07 | 4381.00 | 5.20  | 2.68 | 1.66  |
| -0.66   | 2365.00 | 1.31 | 4.21    | -0.10 | 3801.00 | 1.97  | 0.55 | -0.34 |
| 1.66    | 2985.00 | 4.32 | 1.20    | 0.45  | 3607.00 | 4.96  | 2.44 | 1.51  |
| -0.96   | 2494.00 | 1.96 | 3.56    | 0.02  | 3696.00 | 3.81  | 1.29 | 0.80  |
| 0.12    | 2066.00 | 0.34 | 5.18    | -0.27 | 4111.00 | 2.53  | 0.01 | 0.00  |
| -0.32   | 2134.00 | 1.22 | 4.30    | -0.11 | 3180.00 | 5.69  | 3.17 | 1.96  |
| -0.79   | 1542.00 | 1.04 | 4.48    | -0.15 | 1843.00 | 2.88  | 0.36 | 0.22  |
| -1.10   | 2748.00 | 0.73 | 4.79    | -0.20 | 4848.00 | 1.51  | 1.01 | -0.63 |
| -0.80   | 3432.00 | 0.26 | 5.26    | -0.29 | 3871.00 | 4.21  | 1.69 | 1.04  |
| -0.96   | 3494.00 | 1.75 | 3.77    | -0.02 | 4351.00 | 2.32  | 0.20 | -0.12 |
| 0.88    | 3049.00 | 1.05 | 4.47    | -0.14 | 3857.00 | 3.86  | 1.34 | 0.83  |
| -0.52   | 2457.00 | 1.42 | 4.10    | -0.08 | 3687.00 | 1.19  | 1.33 | -0.82 |
| 3.40    | 1434.00 | 2.86 | 2.66    | 0.19  | 1044.00 | 4.12  | 1.60 | 0.99  |
| 2.78    | 1509.00 | 2.65 | 2.87    | 0.15  | 2412.00 | 4.77  | 2.25 | 1.39  |
| -0.03   | 1961.00 | 1.84 | 3.68    | 0.00  | 2417.00 | 2.32  | 0.20 | -0.13 |
| -0.51   | 3413.00 | 5.13 | 0.39    | 0.60  | 2786.00 | 1.44  | 1.08 | -0.67 |
| -0.92   | 1441.00 | 2.64 | 2.88    | 0.15  | 2494.00 | 1.92  | 0.60 | -0.37 |
| 2.21    | 1741.00 | 3.56 | 1.96    | 0.31  | 2005.00 | 0.65  | 1.87 | -1.16 |
| -0.04   | 1692.00 | 5.26 | 0.26    | 0.62  | 1358.00 | 0.66  | 1.86 | -1.15 |
| 1.00    | 2567.00 | 4.64 | 0.88    | 0.51  | 2033.00 | 1.03  | 1.49 | -0.92 |
| 0.16    | 1151.00 | 1.91 | 3.61    | 0.01  | 955.00  | 3.25  | 0.73 | 0.45  |
| 0.41    | 1670.00 | 1.20 | 4.32    | -0.12 | 1476.00 | 2.24  | 0.28 | -0.18 |
| -0.16   | 1341.00 | 3.50 | 2.02    | 0.30  | 1422.00 | 3.23  | 0.71 | 0.44  |
| -0.27   | 2827.00 | 2.33 | 3.19    | 0.09  | 2334.00 | 1.67  | 0.85 | -0.53 |
| -0.41   | 1338.00 | 0.75 | 4.77    | -0.20 | 1236.00 | 1.78  | 0.74 | -0.46 |
| -1.49   | 2069.00 | 1.31 | 4.22    | -0.10 | 2044.00 | 0.54  | 1.98 | -1.23 |
| 0.29    | 1157.00 | 1.82 | 3.71    | 0.00  | 466.00  | 3.86  | 1.34 | 0.83  |
| 0.09    | 1523.00 | 1.05 | 4.47    | -0.14 | 1597.00 | 1.50  | 1.02 | -0.63 |
| -0.28   | 3351.00 | 2.72 | 2.80    | 0.16  | 2694.00 | 1.26  | 1.26 | -0.78 |
| -1.10   | 2128.00 | 0.61 | 4.91    | -0.22 | 2214.00 | 0.77  | 1.75 | -1.08 |
| -0.72   | 1635.00 | 0.49 | 5.03    | -0.25 | 2014.00 | 0.35  | 2.17 | -1.34 |
| -0.23   | 1256.00 | 2.15 | 3.37    | 0.06  | 1549.00 | 2.20  | 0.33 | -0.20 |
|         | 2513.00 | 1.84 | 3.70    |       | 2819.50 | 2.52  | 1.09 |       |
|         |         | 5.52 | 11.10   |       |         |       | 3.28 |       |
|         |         |      | 5.48    |       |         |       | 1.62 |       |
| 2465.00 | 13.23   |      | 4268.00 | 16.40 |         |       |      |       |
| 4794.00 | 14.21   |      | 4892.00 | 21.53 |         |       |      |       |
|         |         |      |         |       | 3665.00 | 13.04 |      |       |
| 3653.00 | 15.08   |      | 4919.00 | 15.11 |         |       |      |       |
| 3637.33 | 14.17   |      | 4693.00 | 17.68 |         |       |      |       |

|         |       |         |       |
|---------|-------|---------|-------|
| 1164.58 | 0.93  | 368.31  | 3.39  |
| 1426.00 | 0.70  | 1859.00 | 3.17  |
| 1917.00 | 1.20  | 2727.00 | 2.49  |
| 1031.00 | 2.72  | 2596.00 | 3.78  |
| 831.00  | 1.81  | 2631.00 | 4.07  |
| 1259.67 | 1.91  | 2651.33 | 3.45  |
| 577.98  | 0.76  | 67.83   | 0.84  |
|         | 2.79  |         | 10.18 |
|         | 2.29  |         | 2.51  |
|         | 5.08  |         | 12.70 |
|         | 12.26 |         | 14.23 |
|         | 0.41  |         | 0.89  |
|         | 0.59  |         | 0.11  |
| 270.00  | 5.56  | 382.00  | 12.30 |
| 192.00  | 5.21  | 183.00  | 7.10  |
| 2070.00 | 1.64  | 3190.00 | 2.29  |
| 1839.00 | 1.09  | 2757.00 | 3.59  |
| 5544.00 | 1.79  | 5884.00 | 4.13  |
| 5399.00 | 1.78  | 6431.00 | 7.03  |

y

x      debris a,b







x debris a  
x toxic a,b,c

debris a.b

y

y

x        debris a,b

y

y

| Plate    | Well | Gene                      | GeneID              | Cell Count | % inf | Abs Dev |
|----------|------|---------------------------|---------------------|------------|-------|---------|
| 50056.00 | A02  | M-010656- DKFZP564J08     | 25923.00 DKFZP564J  | 2172.00    | 11.14 | 4.52    |
| 50056.00 | A04  | M-026577- zinc finger, DI | 25921.00 ZDHC5      | 3492.00    | 8.25  | 1.63    |
| 50056.00 | A05  | M-009819- tetratricopep   | 23548.00 TTC33      | 3015.00    | 22.16 | 15.54   |
| 50056.00 | A06  | M-015839- cofactor of Bf  | 25920.00 RP13-122B  | 2568.00    | 5.37  | 1.25    |
| 50056.00 | A07  | M-005851- aspartyl amin   | 23549.00 DNPEP      | 3241.00    | 5.62  | 1.00    |
| 50056.00 | A08  | M-013963- THUMP dom       | 25917.00 THUMPD3    | 3866.00    | 12.73 | 6.11    |
| 50056.00 | A09  | M-009560- RASD family,    | 23551.00 RASD2      | 1400.00    | 7.29  | 0.67    |
| 50056.00 | A10  | M-027327- chromosome      | 25915.00 C3orf60    | 678.00     | 19.76 | 13.14   |
| 50056.00 | A11  | M-012447- hyaluronogl     | 23553.00 HYAL4      | 876.00     | 14.73 | 8.11    |
| 50056.00 | A12  | M-031139- rotatin         | 25914.00 RTTN       | 3463.00    | 12.30 | 5.68    |
| 50056.00 | A13  | M-012466- tetraspanin 1   | 23554.00 TSPAN12    | 1956.00    | 8.79  | 2.17    |
| 50056.00 | A14  | M-013962- chromosome      | 25912.00 C1orf43    | 3881.00    | 11.31 | 4.69    |
| 50056.00 | A15  | M-017265- tetraspanin 1   | 23555.00 TSPAN15    | 2848.00    | 9.76  | 3.14    |
| 50056.00 | A16  | M-027328- deleted in a n  | 25911.00 RP11-529I1 | 1364.00    | 15.32 | 8.70    |
| 50056.00 | A17  | M-012463- phosphatidyl    | 23556.00 PIGN       | 2351.00    | 8.17  | 1.55    |
| 50056.00 | A18  | M-013960- transmembra     | 25907.00 TMEM158    | 3175.00    | 10.99 | 4.37    |
| 50056.00 | A19  | M-015835- SNAP-associa    | 23557.00 SNAPAP     | 2890.00    | 13.46 | 6.84    |
| 50056.00 | A20  | M-020237- chromosome      | 25906.00 C11orf51   | 2006.00    | 5.43  | 1.19    |
| 50056.00 | A21  | M-012487- WW domain       | 23559.00 WBP1       | 2451.00    | 5.14  | 1.48    |
| 50056.00 | A23  | M-012467- GTP binding p   | 23560.00 GTPBP4     | 2147.00    | 9.32  | 2.70    |
| 50056.00 | B02  | M-016642- chromosome      | 26355.00 C3orf28    | 2131.00    | 12.91 | 6.29    |
| 50056.00 | B04  | M-016319- guanine nucle   | 26354.00 GNL3       | 2037.00    | 7.41  | 0.79    |
| 50056.00 | B05  | M-013957- zinc finger pr  | 25925.00 ZNF521     | 1745.00    | 6.99  | 0.37    |
| 50056.00 | B06  | M-028212- olfactory rece  | 26339.00 OR5K1      | 2858.00    | 9.94  | 3.32    |
| 50056.00 | B07  | M-016695- nucleolar pro   | 25926.00 NOL11      | 2630.00    | 4.98  | 1.64    |
| 50056.00 | B08  | M-029877- olfactory rece  | 26338.00 OR5L2      | 2379.00    | 6.73  | 0.11    |
| 50056.00 | B09  | M-013958- chromosome      | 25927.00 C2orf32    | 1871.00    | 5.45  | 1.17    |
| 50056.00 | B10  | M-009671- glyceraldehyc   | 26330.00 GAPDHS     | 2163.00    | 5.27  | 1.35    |
| 50056.00 | B11  | M-013959- sclerostin dor  | 25928.00 SOSTDC1    | 2272.00    | 3.87  | 2.75    |
| 50056.00 | B12  | M-019153- globoside alp   | 26301.00 GGBT1      | 3237.00    | 7.57  | 0.95    |
| 50056.00 | B13  | M-013954- gem (nuclear    | 25929.00 GEMIN5     | 3304.00    | 2.00  | 4.62    |
| 50056.00 | B14  | M-013406- UDP-N-acetyl    | 26290.00 GALNT8     | 1977.00    | 5.26  | 1.36    |
| 50056.00 | B15  | M-013955- nipsnap hom     | 25934.00 NIPSNAP3A  | 3914.00    | 8.41  | 1.79    |
| 50056.00 | B16  | M-013755- ankyrin repea   | 26287.00 ANKRD2     | 2869.00    | 1.01  | 5.61    |
| 50056.00 | B17  | M-016722- NSL1, MIND k    | 25936.00 NSL1       | 2744.00    | 2.48  | 4.14    |
| 50056.00 | B18  | M-019991- claudin 17      | 26285.00 CLDN17     | 3958.00    | 5.23  | 1.39    |
| 50056.00 | B19  | M-016083- WW domain       | 25937.00 WWTR1      | 4286.00    | 2.92  | 3.70    |
| 50056.00 | B20  | M-007261- vacuolar prot   | 26276.00 VPS33B     | 4639.00    | 9.08  | 2.46    |
| 50056.00 | B21  | M-021927- HEAT repeat     | 25938.00 HEATR5A    | 4724.00    | 4.00  | 2.62    |
| 50056.00 | B23  | M-013950- SAM domain      | 25939.00 SAMHD1     | 3270.00    | 2.87  | 3.75    |
| 50056.00 | C02  | M-013968- CCR4-NOT tra    | 25904.00 CNOT10     | 4016.00    | 13.10 | 6.48    |
| 50056.00 | C04  | M-022077- olfactomedin    | 25903.00 OLFML2B    | 3655.00    | 1.89  | 4.73    |
| 50056.00 | C05  | M-012800- carbohydrate    | 23563.00 CHST5      | 4367.00    | 6.46  | 0.16    |

|                     |                                 |                 |               |                |              |              |
|---------------------|---------------------------------|-----------------|---------------|----------------|--------------|--------------|
| 50056.00 C06        | M-009949- methylenetet          | 25902.00        | MTHFD1L       | 3882.00        | 4.74         | 1.88         |
| 50056.00 C07        | M-009783- dimethylargir         | 23564.00        | DDAH2         | 4974.00        | 5.25         | 1.37         |
| 50056.00 C08        | M-012989- coiled-coil do        | 25901.00        | CCDC28A       | 3494.00        | 1.32         | 5.30         |
| 50056.00 C09        | M-012450- zinc finger pro       | 23567.00        | ZNF346        | 4264.00        | 1.03         | 5.59         |
| 50056.00 C10        | M-012988- hypothetical          | 25900.00        | HOM-TES-1     | 3345.00        | 1.38         | 5.24         |
| 50056.00 C11        | M-013074- ADP-ribosylat         | 23568.00        | ARL2BP        | 3545.00        | 1.33         | 5.29         |
| 50056.00 C12        | M-006966- ring finger an        | 25898.00        | RCHY1         | 2778.00        | 1.33         | 5.29         |
| 50056.00 C13        | M-012471- peptidyl argir        | 23569.00        | PADI4         | 2070.00        | 1.01         | 5.61         |
| 50056.00 C14        | M-006965- ring finger pro       | 25897.00        | RNF19         | 2521.00        | 3.29         | 3.33         |
| 50056.00 C15        | M-008528- dimethylargir         | 23576.00        | DDAH1         | 3307.00        | 1.27         | 5.35         |
| 50056.00 C16        | M-013971- family with se        | 25895.00        | FAM119B       | 2851.00        | 0.56         | 6.06         |
| 50056.00 C17        | M-020207- PEF protein w         | 23578.00        | PEFLIN        | 2845.00        | 1.76         | 4.86         |
| 50056.00 C18        | M-022573- pleckstrin hor        | 25894.00        | PLEKHG4       | 3252.00        | 1.11         | 5.51         |
| 50056.00 C19        | M-013494- CDC42 effectr         | 23580.00        | CDC42EP4      | 3005.00        | 3.09         | 3.53         |
| 50056.00 C20        | M-013984- regeneration          | 25891.00        | DKFZP586+     | 3156.00        | 1.87         | 4.75         |
| 50056.00 C21        | M-012838- single-strand-        | 23583.00        | SMUG1         | 3759.00        | 1.01         | 5.61         |
| 50056.00 C23        | M-012510- transmembra           | 23585.00        | TMEM50A       | 1836.00        | 1.42         | 5.20         |
| 50056.00 D02        | M-007394- solute carrier        | 26266.00        | SLC13A4       | 2696.00        | 6.08         | 0.54         |
| 50056.00 D04        | M-009637- pallidin homc         | 26258.00        | PLDN          | 3204.00        | 7.80         | 1.18         |
| <b>50056.00 D05</b> | <b>M-022655- family with se</b> | <b>25940.00</b> | <b>FAM98A</b> | <b>4209.00</b> | <b>23.45</b> | <b>16.83</b> |
| 50056.00 D06        | M-020576- opticin               | 26254.00        | OPTC          | 3042.00        | 5.85         | 0.77         |
| 50056.00 D07        | M-013951- chromosome            | 25941.00        | C18orf10      | 3755.00        | 3.60         | 3.02         |
| 50056.00 D08        | M-021374- C-type lectin         | 26253.00        | CLEC4E        | 3800.00        | 9.39         | 2.77         |
| 50056.00 D09        | M-024236- chromosome            | 25943.00        | C20orf194     | 4368.00        | 6.59         | 0.03         |
| 50056.00 D10        | M-010911- kelch-like 3 (L       | 26249.00        | KLHL3         | 5105.00        | 10.66        | 4.04         |
| 50056.00 D11        | M-013946- zinc finger pro       | 25946.00        | ZNF385        | 4012.00        | 7.63         | 1.01         |
| 50056.00 D12        | M-026236- olfactory rece        | 26248.00        | OR2K2         | 2975.00        | 1.45         | 5.17         |
| 50056.00 D13        | M-025313- kelch repeat          | 25948.00        | KBTBD2        | 5182.00        | 8.07         | 1.45         |
| 50056.00 D14        | M-027438- olfactory rece        | 26246.00        | OR2L2         | 3801.00        | 7.81         | 1.19         |
| 50056.00 D15        | M-020239- SYF2 homoloq          | 25949.00        | SYF2          | 2115.00        | 6.67         | 0.05         |
| 50056.00 D16        | M-019978- family with se        | 26240.00        | FAM50B        | 4693.00        | 11.34        | 4.72         |
| 50056.00 D17        | M-016719- RWD domain            | 25950.00        | RWDD3         | 4072.00        | 4.32         | 2.30         |
| 50056.00 D18        | M-020580- chromosome            | 26238.00        | C6orf123      | 6144.00        | 3.43         | 3.19         |
| 50056.00 D19        | M-015028- chromosome            | 25957.00        | C6orf111      | 5421.00        | 6.73         | 0.11         |
| 50056.00 D20        | M-020583- chromosome            | 26236.00        | C6orf54       | 4101.00        | 5.58         | 1.04         |
| 50056.00 D21        | M-027345- ankyrin repea         | 25959.00        | ANKRD25       | 2561.00        | 1.91         | 4.71         |
| 50056.00 D23        | M-008749- nudix (nucleo         | 25961.00        | NUDT13        | 2411.00        | 1.00         | 5.62         |
| 50056.00 E02        | M-019470- ABI gene fam          | 25890.00        | ABI3BP        | 5257.00        | 12.02        | 5.40         |
| 50056.00 E04        | M-023781- zinc finger pro       | 25888.00        | ZNF473        | 3547.00        | 9.75         | 3.13         |
| 50056.00 E05        | M-012511- DEAD (Asp-Gl          | 23586.00        | DDX58         | 5166.00        | 9.31         | 2.69         |
| 50056.00 E06        | M-017717- WD repeat dc          | 25886.00        | WDR51A        | 4642.00        | 4.63         | 1.99         |
| 50056.00 E07        | M-012839- kelch domain          | 23588.00        | KLHDC2        | 4178.00        | 7.23         | 0.61         |
| 50056.00 E08        | M-013983- polymerase (l         | 25885.00        | POLR1A        | 2874.00        | 6.26         | 0.36         |
| 50056.00 E09        | M-020614- calcium regul         | 23589.00        | CARHSP1       | 2912.00        | 2.44         | 4.18         |

|                     |                                |                 |                  |                |              |              |
|---------------------|--------------------------------|-----------------|------------------|----------------|--------------|--------------|
| 50056.00 E10        | M-013982- chordin-like 2       | 25884.00        | CHRD2            | 2727.00        | 6.34         | 0.28         |
| 50056.00 E11        | M-008464- prenyl (decap        | 23590.00        | PDSS1            | 2741.00        | 13.90        | 7.28         |
| 50056.00 E12        | M-020236- transmembra          | 25880.00        | TMEM186          | 1254.00        | 1.75         | 4.87         |
| 50056.00 E13        | M-004376- apoptosis rel        | 23591.00        | APR-2            | 1979.00        | 4.04         | 2.58         |
| 50056.00 E14        | M-017898- WD repeats a         | 25879.00        | WDSOF1           | 2483.00        | 2.09         | 4.53         |
| 50056.00 E15        | M-006306- LEM domain           | 23592.00        | LEMD3            | 1711.00        | 3.39         | 3.23         |
| 50056.00 E16        | M-013988- matrix-remoc         | 25878.00        | MXRA5            | 2635.00        | 2.47         | 4.15         |
| 50056.00 E17        | M-020612- heme binding         | 23593.00        | HEBP2            | 4346.00        | 1.06         | 5.56         |
| 50056.00 E18        | M-020233- brain protein        | 25874.00        | BRP44            | 2587.00        | 1.12         | 5.50         |
| 50056.00 E19        | M-003285- origin recogni       | 23595.00        | ORC3L            | 3080.00        | 2.11         | 4.51         |
| 50056.00 E20        | M-010130- ribosomal prc        | 25873.00        | RPL36            | 587.00         | 1.19         | 5.43         |
| 50056.00 E21        | M-021371- C-type lectin        | 23601.00        | CLEC5A           | 1895.00        | 1.11         | 5.51         |
| 50056.00 E23        | M-006959- makorin, ring        | 23608.00        | MKRN1            | 1856.00        | 1.40         | 5.22         |
| 50056.00 F02        | M-008434- T-cell lympho        | 26230.00        | TIAM2            | 4059.00        | 4.31         | 2.31         |
| 50056.00 F04        | M-012439- beta-1,3-gluc        | 26229.00        | B3GAT3           | 3775.00        | 3.50         | 3.12         |
| 50056.00 F05        | M-019278- KIAA1429             | 25962.00        | KIAA1429         | 4208.00        | 5.75         | 0.87         |
| 50056.00 F06        | M-029608- olfactory rece       | 26219.00        | OR1J4            | 3526.00        | 7.03         | 0.41         |
| 50056.00 F07        | M-018401- transmembra          | 25963.00        | TMEM87A          | 3714.00        | 4.90         | 1.72         |
| 50056.00 F08        | M-031855- olfactory rece       | 26212.00        | OR2B6            | 2814.00        | 2.24         | 4.38         |
| 50056.00 F09        | M-024375- chromosome           | 25966.00        | C21orf25         | 5001.00        | 3.46         | 3.16         |
| 50056.00 F10        | M-012476- phosphatidyli        | 26207.00        | PITPNC1          | 4418.00        | 7.24         | 0.62         |
| <b>50056.00 F11</b> | <b>M-013947- SH2B adaptor</b>  | <b>25970.00</b> | <b>SH2B1</b>     | <b>5722.00</b> | <b>16.15</b> | <b>9.53</b>  |
| 50056.00 F12        | M-012480- sperm associ         | 26206.00        | SPAG8            | 3244.00        | 5.67         | 0.95         |
| 50056.00 F13        | M-015937- unc-50 homo          | 25972.00        | UNC50            | 3981.00        | 10.17        | 3.55         |
| 50056.00 F14        | M-012470- glucocorticoi        | 26205.00        | GMEB2            | 2675.00        | 6.13         | 0.49         |
| 50056.00 F15        | M-016977- prolyl-tRNA s'       | 25973.00        | PARS2            | 3633.00        | 6.52         | 0.10         |
| 50056.00 F16        | M-030679- olfactory rece       | 26184.00        | OR1F2            | 3176.00        | 0.79         | 5.83         |
| 50056.00 F17        | M-021789- methylmalon          | 25974.00        | MMACHC           | 4697.00        | 6.64         | 0.02         |
| <b>50056.00 F18</b> | <b>M-021993- chromosome</b>    | <b>26175.00</b> | <b>C14orf109</b> | <b>5263.00</b> | <b>17.52</b> | <b>10.90</b> |
| 50056.00 F19        | M-017872- NECAP endoc          | 25977.00        | NECAP1           | 3473.00        | 6.39         | 0.23         |
| 50056.00 F20        | M-025278- integrator coi       | 26173.00        | INTS1            | 2637.00        | 4.51         | 2.11         |
| 50056.00 F21        | M-004700- chromatin mc         | 25978.00        | CHMP2B           | 3012.00        | 7.93         | 1.31         |
| 50056.00 F23        | M-009732- dehydrogena          | 25979.00        | DHRS7B           | 1690.00        | 2.49         | 4.13         |
| 50056.00 G02        | M-013987- chromosome           | 25871.00        | C3orf17          | 2470.00        | 4.94         | 1.68         |
| 50056.00 G04        | M-010655- sulfatase moc        | 25870.00        | SUMF2            | 4865.00        | 7.40         | 0.78         |
| 50056.00 G05        | M-006960- makorin, ring        | 23609.00        | MKRN2            | 3781.00        | 8.94         | 2.32         |
| 50056.00 G06        | M-021274- abhydrolase c        | 25864.00        | ABHD14A          | 3868.00        | 8.20         | 1.58         |
| 50056.00 G07        | M-009546- SH3-domain t         | 23616.00        | SH3BP1           | 4235.00        | 27.93        | <b>21.31</b> |
| 50056.00 G08        | M-005945- ubiquitin spe        | 25862.00        | USP49            | 3946.00        | 11.86        | 5.24         |
| 50056.00 G09        | M-031995- zinc finger, irr     | 23619.00        | ZIM2             | 3316.00        | 10.01        | 3.39         |
| 50056.00 G10        | M-026195- deafness, aut        | 25861.00        | DFNB31           | 5049.00        | 11.19        | 4.57         |
| <b>50056.00 G11</b> | <b>M-003747- beta-site APP</b> | <b>23621.00</b> | <b>BACE1</b>     | <b>1215.00</b> | <b>23.54</b> | <b>16.92</b> |
| 50056.00 G12        | M-013380- prostate andr        | 25859.00        | PART1            | 1426.00        | 8.98         | 2.36         |
| 50056.00 G13        | M-020607- RUN and SH3          | 23623.00        | RUSC1            | 3816.00        | 13.31        | 6.69         |

|              |                           |                    |         |       |      |
|--------------|---------------------------|--------------------|---------|-------|------|
| 50056.00 G14 | M-020230- DKFZP586N0      | 25856.00 DKFZP586M | 3726.00 | 11.76 | 5.14 |
| 50056.00 G15 | M-009918- carbonic anhy   | 23632.00 CA14      | 1406.00 | 6.69  | 0.07 |
| 50056.00 G16 | M-010497- breast cancer   | 25855.00 BRMS1     | 3552.00 | 6.81  | 0.19 |
| 50056.00 G17 | M-010923- single-strand   | 23635.00 SSBP2     | 3261.00 | 8.65  | 2.03 |
| 50056.00 G18 | M-012981- WD repeat do    | 25853.00 WDR40A    | 2214.00 | 4.38  | 2.24 |
| 50056.00 G19 | M-012803- RAB GTPase a    | 23637.00 RABGAP1   | 2813.00 | 11.84 | 5.22 |
| 50056.00 G20 | M-021273- DKFZP434B0      | 25851.00 DKFZP434E | 2689.00 | 9.48  | 2.86 |
| 50056.00 G21 | M-018722- leucine rich r  | 23639.00 LRRC6     | 3810.00 | 14.46 | 7.84 |
| 50056.00 G23 | M-020298- lymphocyte a    | 23643.00 LY96      | 2948.00 | 10.99 | 4.37 |
| 50056.00 H02 | M-023473- chromosome      | 26172.00 C3orf41   | 3212.00 | 6.38  | 0.24 |
| 50056.00 H04 | M-006034- SUMO1/senti     | 26168.00 SENP3     | 2233.00 | 7.79  | 1.17 |
| 50056.00 H05 | M-015233- chromosome      | 25980.00 C20orf4   | 2147.00 | 8.71  | 2.09 |
| 50056.00 H06 | M-013890- regulator of C  | 26166.00 RGS22     | 2318.00 | 9.15  | 2.53 |
| 50056.00 H07 | M-021915- neuroguidin,    | 25983.00 NGDN      | 2288.00 | 8.87  | 2.25 |
| 50056.00 H08 | M-013889- family with se  | 26165.00 FAM75A7   | 1757.00 | 13.09 | 6.47 |
| 50056.00 H09 | M-017334- keratin 23 (hi  | 25984.00 KRT23     | 2719.00 | 12.58 | 5.96 |
| 50056.00 H10 | M-013036- GTP binding p   | 26164.00 GTPBP5    | 1653.00 | 8.11  | 1.49 |
| 50056.00 H11 | M-013949- tsukushin       | 25987.00 TSKU      | 2770.00 | 8.01  | 1.39 |
| 50056.00 H12 | M-022650- intraflagellar  | 26160.00 IFT172    | 1650.00 | 4.73  | 1.89 |
| 50056.00 H13 | M-023183- sushi, nidoge   | 25992.00 SNED1     | 2492.00 | 8.75  | 2.13 |
| 50056.00 H14 | M-013032- GTPase, IMAF    | 26157.00 GIMAP2    | 3035.00 | 14.14 | 7.52 |
| 50056.00 H15 | M-020245- REX2, RNA ex    | 25996.00 REXO2     | 2030.00 | 7.54  | 0.92 |
| 50056.00 H16 | M-022489- ribosomal L1    | 26156.00 RSL1D1    | 2343.00 | 7.73  | 1.11 |
| 50056.00 H17 | M-028643- inhibitor of B  | 25998.00 IBTK      | 2858.00 | 6.16  | 0.46 |
| 50056.00 H18 | M-020539- nucleolar con   | 26155.00 NOC2L     | 1945.00 | 5.09  | 1.53 |
| 50056.00 H19 | M-016723- TBC1 domain     | 26000.00 TBC1D10B  | 2958.00 | 12.85 | 6.23 |
| 50056.00 H20 | M-006970- zinc finger pro | 26152.00 ZNF337    | 3209.00 | 5.67  | 0.95 |
| 50056.00 H21 | M-006967- ring finger pro | 26001.00 RNF167    | 3209.00 | 10.28 | 3.66 |
| 50056.00 H23 | M-009446- monooxygen      | 26002.00 MOXD1     | 3253.00 | 8.52  | 1.90 |
| 50056.00 I02 | M-017731- zinc finger pro | 25850.00 ZNF345    | 5233.00 | 10.20 | 3.58 |
| 50056.00 I04 | M-020227- DKFZP564O0      | 25849.00 DKFZP564C | 5107.00 | 9.61  | 2.99 |
| 50056.00 I05 | M-016635- enhancer of r   | 23644.00 EDC4      | 4225.00 | 13.44 | 6.82 |
| 50056.00 I06 | M-021271- anaphase pro    | 25847.00 ANAPC13   | 5474.00 | 9.41  | 2.79 |
| 50056.00 I07 | M-009659- phospholipas    | 23646.00 PLD3      | 5210.00 | 11.82 | 5.20 |
| 50056.00 I08 | M-013995- Yip1 domain i   | 25844.00 YIPF3     | 4070.00 | 15.06 | 8.44 |
| 50056.00 I09 | M-015513- single strand   | 23648.00 SSBP3     | 2522.00 | 9.04  | 2.42 |
| 50056.00 I10 | M-020224- preimplantati   | 25843.00 PREI3     | 2927.00 | 10.63 | 4.01 |
| 50056.00 I11 | M-016027- polymerase (l   | 23649.00 POLA2     | 3054.00 | 12.34 | 5.72 |
| 50056.00 I12 | M-020222- ASF1 anti-sile  | 25842.00 ASF1A     | 3629.00 | 8.79  | 2.17 |
| 50056.00 I13 | M-012409- tripartite mot  | 23650.00 TRIM29    | 2151.00 | 6.09  | 0.53 |
| 50056.00 I14 | M-013994- methyltransfe   | 25840.00 METTL7A   | 2517.00 | 11.32 | 4.70 |
| 50056.00 I15 | M-031513- plexin B2       | 23654.00 PLXNB2    | 1993.00 | 8.13  | 1.51 |
| 50056.00 I16 | M-020586- mannosyl (alp   | 25834.00 MGAT4C    | 2830.00 | 9.05  | 2.43 |
| 50056.00 I17 | M-007612- solute carrier  | 23657.00 SLC7A11   | 3765.00 | 11.98 | 5.36 |

|              |                           |          |           |         |       |       |
|--------------|---------------------------|----------|-----------|---------|-------|-------|
| 50056.00 I18 | M-020218- neuroblastom    | 25832.00 | NBPF14    | 3230.00 | 12.07 | 5.45  |
| 50056.00 I19 | M-019555- LSM5 homolc     | 23658.00 | LSM5      | 2060.00 | 12.57 | 5.95  |
| 50056.00 I20 | M-010393- sulfotransferc  | 25830.00 | SULT4A1   | 2784.00 | 11.24 | 4.62  |
| 50056.00 I21 | M-020348- transmembra     | 23670.00 | TMEM2     | 3174.00 | 9.07  | 2.45  |
| 50056.00 I23 | M-010654- transmembra     | 23671.00 | TMEFF2    | 2612.00 | 11.95 | 5.33  |
| 50056.00 J02 | M-017635- N-acetyltrans   | 26151.00 | NAT9      | 2453.00 | 2.69  | 3.93  |
| 50056.00 J04 | M-013891- RIB43A doma     | 26150.00 | RIBC2     | 2695.00 | 4.53  | 2.09  |
| 50056.00 J05 | M-019045- golgi reassem   | 26003.00 | GORASP2   | 2858.00 | 5.39  | 1.23  |
| 50056.00 J06 | M-014109- zinc finger pro | 26149.00 | ZNF658    | 3191.00 | 7.68  | 1.06  |
| 50056.00 J07 | M-026690- hypothetical    | 26005.00 | DKFZP586F | 2125.00 | 2.31  | 4.31  |
| 50056.00 J08 | M-015742- chromosome      | 26148.00 | C10orf12  | 2499.00 | 4.56  | 2.06  |
| 50056.00 J09 | M-013939- zinc finger, ZZ | 26009.00 | ZZZ3      | 1708.00 | 2.28  | 4.34  |
| 50056.00 J10 | M-026200- PHD finger pr   | 26147.00 | PHF19     | 2106.00 | 1.38  | 5.24  |
| 50056.00 J11 | M-020248- viral DNA pol   | 26010.00 | LOC26010  | 2790.00 | 9.28  | 2.66  |
| 50056.00 J12 | M-015848- TNF receptor    | 26146.00 | TRAF3IP1  | 3180.00 | 6.51  | 0.11  |
| 50056.00 J13 | M-026701- odz, odd Oz/t   | 26011.00 | ODZ4      | 4287.00 | 4.74  | 1.88  |
| 50056.00 J14 | M-006969- interferon re   | 26145.00 | IRF2BP1   | 3731.00 | 3.19  | 3.43  |
| 50056.00 J15 | M-016760- nasal embryo    | 26012.00 | NELF      | 3595.00 | 11.88 | 5.26  |
| 50056.00 J16 | M-020535- tubulin tyrosi  | 26140.00 | TTLL3     | 5038.00 | 9.37  | 2.75  |
| 50056.00 J17 | M-013544- l(3)mbt-like (l | 26013.00 | L3MBTL    | 4045.00 | 3.58  | 3.04  |
| 50056.00 J18 | M-020529- zinc finger an  | 26137.00 | ZBTB20    | 3806.00 | 5.62  | 1.00  |
| 50056.00 J19 | M-017328- RNA polymer     | 26015.00 | RPAP1     | 2812.00 | 4.52  | 2.10  |
| 50056.00 J20 | M-013026- testis derived  | 26136.00 | TES       | 4315.00 | 8.71  | 2.09  |
| 50056.00 J21 | M-020251- family with se  | 26017.00 | FAM32A    | 6196.00 | 8.46  | 1.84  |
| 50056.00 J23 | M-012993- UPF2 regulatc   | 26019.00 | UPF2      | 4066.00 | 4.35  | 2.27  |
| 50056.00 K02 | M-016076- chromosome      | 25829.00 | C22orf5   | 5348.00 | 13.26 | 6.64  |
| 50056.00 K04 | M-017448- thioredoxin 2   | 25828.00 | TXN2      | 1944.00 | 4.37  | 2.25  |
| 50056.00 K05 | M-018246- syntaxin 12     | 23673.00 | STX12     | 3951.00 | 9.47  | 2.85  |
| 50056.00 K06 | M-003802- beta-site APP   | 25825.00 | BACE2     | 3433.00 | 6.52  | 0.10  |
| 50056.00 K07 | M-020606- small muscle    | 23676.00 | SMPX      | 4658.00 | 15.11 | 8.49  |
| 50056.00 K08 | M-019102- peroxiredoxir   | 25824.00 | PRDX5     | 3412.00 | 5.25  | 1.37  |
| 50056.00 K09 | M-008507- potassium vo    | 23704.00 | KCNE4     | 2587.00 | 5.30  | 1.32  |
| 50056.00 K10 | M-006058- tryptase gam    | 25823.00 | TPSG1     | 3551.00 | 6.17  | 0.45  |
| 50056.00 K11 | M-016565- cell adhesion   | 23705.00 | CADM1     | 2380.00 | 3.45  | 3.17  |
| 50056.00 K12 | M-016492- DnaJ (Hsp40)    | 25822.00 | DNAJB5    | 3034.00 | 5.34  | 1.28  |
| 50056.00 K13 | M-020400- G1 to S phase   | 23708.00 | GSPT2     | 1934.00 | 4.60  | 2.02  |
| 50056.00 K14 | M-010190- mitochondria    | 25821.00 | MTO1      | 2192.00 | 5.98  | 0.64  |
| 50056.00 K15 | M-014764- chromosome      | 23731.00 | C9orf5    | 3233.00 | 7.08  | 0.46  |
| 50056.00 K16 | M-012414- CCR4 carbon     | 25819.00 | CCRN4L    | 2618.00 | 8.82  | 2.20  |
| 50056.00 K17 | M-026185- chromosome      | 23732.00 | C9orf4    | 3001.00 | 6.86  | 0.24  |
| 50056.00 K18 | M-005916- kallikrein-rela | 25818.00 | KLK5      | 2463.00 | 4.47  | 2.15  |
| 50056.00 K19 | M-003258- EP300 interac   | 23741.00 | EID1      | 2077.00 | 3.32  | 3.30  |
| 50056.00 K20 | M-013997- family with se  | 25817.00 | FAM19A5   | 4965.00 | 21.91 | 15.29 |
| 50056.00 K21 | M-021248- chromosome      | 23742.00 | C15orf2   | 2853.00 | 8.80  | 2.18  |

|                     |                                                         |                         |                |              |              |
|---------------------|---------------------------------------------------------|-------------------------|----------------|--------------|--------------|
| 50056.00 K23        | M-010395- betaine-homocysteine methyltransferase        | 23743.00 BHMT2          | 2030.00        | 6.90         | 0.28         |
| 50056.00 L02        | M-020528- SERPINE1 mR                                   | 26135.00 SERBP1         | 1947.00        | 2.11         | 4.51         |
| <b>50056.00 L04</b> | <b>M-021384- transient receptor potential channel 4</b> | <b>26133.00 TRPC4AP</b> | <b>2933.00</b> | <b>12.62</b> | <b>6.00</b>  |
| 50056.00 L05        | M-021366- pentatricopeptide repeat                      | 26024.00 PTC1           | 2648.00        | 3.06         | 3.56         |
| <b>50056.00 L06</b> | <b>M-026206- GTPase activating protein 1</b>            | <b>26130.00 GAPVD1</b>  | <b>3579.00</b> | <b>13.44</b> | <b>6.82</b>  |
| 50056.00 L07        | M-022051- pleckstrin homology domain                    | 26030.00 PLEKHG3        | 2841.00        | 9.54         | 2.92         |
| 50056.00 L08        | M-013896- KIAA1279                                      | 26128.00 KIAA1279       | 2644.00        | 11.01        | 4.39         |
| 50056.00 L09        | M-009380- oxysterol binding protein 1                   | 26031.00 OSBP1          | 3356.00        | 8.49         | 1.87         |
| 50056.00 L10        | M-013895- FGFR1 oncogene                                | 26127.00 FGFR1OP2       | 2910.00        | 11.72        | 5.10         |
| 50056.00 L11        | M-023461- sushi domain                                  | 26032.00 SUSP5          | 1615.00        | 6.19         | 0.43         |
| 50056.00 L12        | M-013900- chromosome 10 open reading frame 61           | 26123.00 C10orf61       | 3485.00        | 10.04        | 3.42         |
| 50056.00 L13        | M-026316- attractin-like                                | 26033.00 ATRNL1         | 2994.00        | 13.83        | 7.21         |
| 50056.00 L14        | M-016776- enhancer of polyoma virus transformation 2    | 26122.00 EPC2           | 2183.00        | 13.19        | 6.57         |
| 50056.00 L15        | M-027160- phosphoinositide 3-kinase                     | 26034.00 PIP3-E         | 3106.00        | 17.32        | <b>10.70</b> |
| 50056.00 L16        | M-013015- WD repeat domain                              | 26118.00 WSB1           | 3169.00        | 16.03        | <b>9.41</b>  |
| 50056.00 L17        | M-022261- glucuronic acid 6-O-sulfontransferase         | 26035.00 GLCE           | 3551.00        | 9.07         | 2.45         |
| 50056.00 L18        | M-029428- DKFZP434M1                                    | 26117.00 DKFZP434M1     | 3799.00        | 13.14        | 6.52         |
| 50056.00 L19        | M-013935- zinc finger protein                           | 26036.00 ZNF451         | 6021.00        | 23.07        | <b>16.45</b> |
| 50056.00 L20        | M-030921- tetratricopeptide repeat                      | 26115.00 TANC2          | 3075.00        | 13.33        | 6.71         |
| 50056.00 L21        | M-013936- signal-inducible protein                      | 26037.00 SIPA1L1        | 3765.00        | 13.89        | 7.27         |
| 50056.00 L23        | M-009878- chromodomain                                  | 26038.00 CHD5           | 2213.00        | 6.91         | 0.29         |
| 50056.00 M02        | M-020593- ataxin 10                                     | 25814.00 ATXN10         | 2809.00        | 4.70         | 1.92         |
| 50056.00 M04        | M-017871- sorting and trafficking protein               | 25813.00 SAMM50         | 3920.00        | 2.73         | 3.89         |
| 50056.00 M05        | M-004708- stromal cell derived factor 1                 | 23753.00 SDF2L1         | 3864.00        | 8.57         | 1.95         |
| 50056.00 M06        | M-009556- tubulin tyrosine ligase                       | 25809.00 TTLL1          | 3256.00        | 5.80         | 0.82         |
| 50056.00 M07        | M-007205- peptidylprolyl isomerase                      | 23759.00 PPIL2          | 2894.00        | 5.01         | 1.61         |
| 50056.00 M08        | M-019752- rhomboid domain                               | 25807.00 RHBDD3         | 1455.00        | 4.67         | 1.95         |
| 50056.00 M09        | M-006459- phosphatidylinositol 3-kinase                 | 23760.00 PITPNB         | 2113.00        | 4.02         | 2.60         |
| 50056.00 M10        | M-019596- BMP and activin mediator protein 1            | 25805.00 BAMBI          | 3393.00        | 5.04         | 1.58         |
| 50056.00 M11        | M-009548- phosphatidylinositol 3-kinase                 | 23761.00 PISD           | 3053.00        | 4.16         | 2.46         |
| 50056.00 M12        | M-017025- LSM4 homolog                                  | 25804.00 LSM4           | 2270.00        | 4.98         | 1.64         |
| 50056.00 M13        | M-009096- oxysterol binding protein 2                   | 23762.00 OSBP2          | 2215.00        | 2.48         | 4.14         |
| 50056.00 M14        | M-012438- grancalcin, EF                                | 25801.00 GCA            | 1629.00        | 5.89         | 0.73         |
| 50056.00 M15        | M-010090- fibronectin leucine rich type 1 domain        | 23767.00 FLRT3          | 2508.00        | 9.25         | 2.63         |
| 50056.00 M16        | M-007572- solute carrier                                | 25800.00 SLC39A6        | 1559.00        | 2.76         | 3.86         |
| 50056.00 M17        | M-009104- fibronectin leucine rich type 1 domain        | 23768.00 FLRT2          | 1883.00        | 4.94         | 1.68         |
| <b>50056.00 M18</b> | <b>M-006964- zinc finger protein</b>                    | <b>25799.00 ZNF324</b>  | <b>2059.00</b> | <b>13.50</b> | <b>6.88</b>  |
| 50056.00 M19        | M-010103- fibronectin leucine rich type 1 domain        | 23769.00 FLRT1          | 1509.00        | 7.69         | 1.07         |
| 50056.00 M20        | M-020217- brain protein                                 | 25798.00 BRI3           | 3401.00        | 11.79        | 5.17         |
| 50056.00 M21        | M-006963- bromodomain                                   | 23774.00 BRD1           | 3579.00        | 12.18        | 5.56         |
| 50056.00 M23        | M-007371- mitochondria                                  | 23788.00 MTCH2          | 1935.00        | 11.89        | 5.27         |
| 50056.00 N02        | M-013899- coiled-coil domain                            | 26112.00 CCDC69         | 2991.00        | 9.36         | 2.74         |
| 50056.00 N04        | M-013908- pygopus hom                                   | 26108.00 PYGO1          | 4222.00        | 11.01        | 4.39         |
| <b>50056.00 N05</b> | <b>M-013929- synovial sarcoma</b>                       | <b>26039.00 SS18L1</b>  | <b>3909.00</b> | <b>17.60</b> | <b>10.98</b> |



|              |                           |                    |         |       |              |
|--------------|---------------------------|--------------------|---------|-------|--------------|
| 50056.00 N06 | M-027968- DKFZP586K1E     | 26106.00 DKFZP586k | 4517.00 | 17.62 | <b>11.00</b> |
| 50056.00 N07 | M-013930- SET binding p   | 26040.00 SETBP1    | 3402.00 | 22.11 | <b>15.49</b> |
| 50056.00 N08 | M-013907- leucine rich r  | 26103.00 LRRC21    | 3604.00 | 8.02  | 1.40         |
| 50056.00 N09 | M-023533- UBX domain c    | 26043.00 UBXD7     | 3081.00 | 4.51  | 2.11         |
| 50056.00 N10 | M-020521- WD repeat dc    | 26100.00 WIPI2     | 2976.00 | 6.01  | 0.61         |
| 50056.00 N11 | M-006968- zinc finger pro | 26046.00 ZNF294    | 3548.00 | 23.48 | <b>16.86</b> |
| 50056.00 N12 | M-013910- chromosome      | 26099.00 C1orf144  | 2661.00 | 5.52  | 1.10         |
| 50056.00 N13 | M-022625- zinc finger pro | 26048.00 ZNF500    | 3834.00 | 14.97 | 8.35         |
| 50056.00 N14 | M-013017- chromosome      | 26098.00 C10orf137 | 3104.00 | 7.57  | 0.95         |
| 50056.00 N15 | M-024510- KIAA0888 prc    | 26049.00 KIAA0888  | 2779.00 | 9.25  | 2.63         |
| 50056.00 N16 | M-017681- chromosome      | 26097.00 C1orf77   | 2798.00 | 9.15  | 2.53         |
| 50056.00 N17 | M-021578- SLIT and NTRI   | 26050.00 SLITRK5   | 4246.00 | 5.77  | 0.85         |
| 50056.00 N18 | M-013909- protein tyrosi  | 26095.00 PTPN20B   | 3502.00 | 10.71 | 4.09         |
| 50056.00 N19 | M-013931- dynamin 3       | 26052.00 DN3       | 5252.00 | 22.53 | <b>15.91</b> |
| 50056.00 N20 | M-013016- WD repeat dc    | 26094.00 WDR21A    | 6457.00 | 18.32 | <b>11.70</b> |
| 50056.00 N21 | M-006044- SUMO1/senti     | 26054.00 SENP6     | 3323.00 | 8.13  | 1.51         |
| 50056.00 N23 | M-004298- RAB11 family    | 26056.00 RAB11FIP5 | 2647.00 | 3.78  | 2.84         |
| 50056.00 O02 | M-012474- glutaminy-pe    | 25797.00 QPCT      | 3698.00 | 13.85 | 7.23         |
| 50056.00 O04 | M-020023- 6-phosphoglu    | 25796.00 PGLS      | 2400.00 | 9.54  | 2.92         |
| 50056.00 O05 | M-019887- echinoderm r    | 24139.00 EML2      | 1760.00 | 8.30  | 1.68         |
| 50056.00 O06 | M-009354- neuronal gua    | 25791.00 NGEF      | 1908.00 | 9.38  | 2.76         |
| 50056.00 O07 | M-019966- tuftelin intere | 24144.00 TFIP11    | 2074.00 | 8.20  | 1.58         |
| 50056.00 O08 | M-019578- coiled-coil do  | 25790.00 CCDC19    | 1689.00 | 3.08  | 3.54         |
| 50056.00 O09 | M-015596- claudin 15      | 24146.00 CLDN15    | 1478.00 | 4.26  | 2.36         |
| 50056.00 O10 | M-012412- transmembra     | 25789.00 TMEM59L   | 2737.00 | 9.86  | 3.24         |
| 50056.00 O11 | M-012512- four jointed b  | 24147.00 FJX1      | 710.00  | 2.39  | 4.23         |
| 50056.00 O12 | M-015687- KIAA0889 prc    | 25781.00 KIAA0889  | 2609.00 | 9.28  | 2.66         |
| 50056.00 O13 | M-012821- PRP6 pre-mR     | 24148.00 PRPF6     | 968.00  | 3.93  | 2.69         |
| 50056.00 O14 | M-009959- unc-84 homo     | 25777.00 UNC84B    | 2823.00 | 2.69  | 3.93         |
| 50056.00 O15 | M-020601- zinc finger pro | 24149.00 ZNF318    | 1985.00 | 4.18  | 2.44         |
| 50056.00 O16 | M-017047- chibby homol    | 25776.00 CBY1      | 1852.00 | 1.35  | 5.27         |
| 50056.00 O17 | M-025036- chromosome      | 25763.00 CXorf27   | 2928.00 | 2.19  | 4.43         |
| 50056.00 O18 | M-020281- glutathione S-  | 25774.00 HS322B1A  | 3768.00 | 1.06  | 5.56         |
| 50056.00 O19 | M-016841- Huntingtin int  | 25764.00 HYPK      | 3386.00 | 3.07  | 3.55         |
| 50056.00 O20 | M-009319- TBC1 domain     | 25771.00 TBC1D22A  | 1588.00 | 1.57  | 5.05         |
| 50056.00 O21 | M-007465- solute carrier  | 25769.00 SLC24A2   | 2593.00 | 3.70  | 2.92         |
| 50056.00 O23 | M-020284- chromosome      | 25770.00 C22orf31  | 2241.00 | 5.53  | 1.09         |
| 50056.00 P02 | M-020279- coiled-coil do  | 26093.00 CCDC9     | 1013.00 | 4.64  | 1.98         |
| 50056.00 P04 | M-013913- torsin A inter  | 26092.00 TOR1AIP1  | 1719.00 | 4.48  | 2.14         |
| 50056.00 P05 | M-013554- ankyrin repea   | 26057.00 ANKRD17   | 1234.00 | 3.32  | 3.30         |
| 50056.00 P06 | M-005850- abhydrolase c   | 26090.00 ABHD12    | 1406.00 | 2.92  | 3.70         |
| 50056.00 P07 | M-013918- trinucleotide   | 26058.00 TNRC15    | 1958.00 | 3.68  | 2.94         |
| 50056.00 P08 | M-013694- golgi associat  | 26088.00 GGA1      | 1621.00 | 1.48  | 5.14         |
| 50056.00 P09 | M-019772- 2-hydroxyacy    | 26061.00 HACL1     | 2103.00 | 1.38  | 5.24         |

|              |                                     |          |           |         |       |      |
|--------------|-------------------------------------|----------|-----------|---------|-------|------|
| 50056.00 P10 | M-019350- G-protein sigr            | 26086.00 | GPSM1     | 2111.00 | 0.95  | 5.67 |
| 50056.00 P11 | M-013919- retinoic acid i           | 26064.00 | RAI14     | 2359.00 | 1.14  | 5.48 |
| 50056.00 P12 | M-005910- kallikrein-rela           | 26085.00 | KLK13     | 3012.00 | 1.76  | 4.86 |
| 50056.00 P13 | M-013920- LSM14A, SCD               | 26065.00 | LSM14A    | 978.00  | 2.05  | 4.58 |
| 50056.00 P14 | M-020274- DKFZP43400                | 26083.00 | DKFZP434C | 1747.00 | 1.43  | 5.19 |
| 50056.00 P15 | M-020268- family with se            | 26071.00 | FAM127B   | 2656.00 | 0.98  | 5.64 |
| 50056.00 P16 | M-030372- DKFZP434L18               | 26082.00 | DKFZP434L | 2362.00 | 0.93  | 5.69 |
| 50056.00 P17 | M-013009- polymerase (l             | 26073.00 | POLDIP2   | 3357.00 | 1.16  | 5.46 |
| 50056.00 P18 | M-030267- DKFZP434B06               | 26080.00 | DKFZP434E | 2994.00 | 0.63  | 5.99 |
| 50056.00 P19 | M-007320- ion transport             | 25947.00 | DKFZP434F | 4226.00 | 0.99  | 5.63 |
| 50056.00 P20 | M-013921- chromosome                | 26074.00 | C20orf26  | 2836.00 | 0.81  | 5.81 |
| 50056.00 P21 | M-020324- peptide YY, 2             | 23615.00 | PYY2      | 2477.00 | 1.17  | 5.45 |
| 50056.00 P23 | M-013231- ribosomal prc             | 51065.00 | RPS27L    | 3250.00 | 0.43  | 6.19 |
|              |                                     |          |           | 2953.00 | 6.62  | 3.08 |
|              |                                     |          |           |         |       | 9.24 |
|              |                                     |          |           |         |       | 4.56 |
|              |                                     |          |           | MADc    |       |      |
| 50056.00 C22 |                                     |          |           | 1955.00 | 20.72 |      |
| 50056.00 D22 |                                     |          |           | 1871.00 | 21.33 |      |
| 50056.00 E22 |                                     | 1567.00  | 9.51      |         |       |      |
| 50056.00 F22 |                                     | 2119.00  | 49.13     |         |       |      |
|              |                                     |          | mn        | 1913.00 | 21.02 |      |
|              |                                     |          | sd        | 59.40   | 0.43  |      |
| 50056.00 G22 |                                     |          |           | 936.00  | 6.52  |      |
| 50056.00 H22 |                                     |          |           | 882.00  | 5.56  |      |
| 50056.00 I22 |                                     | 434.00   | 13.59     |         |       |      |
| 50056.00 J22 |                                     |          |           | 1308.00 | 2.22  |      |
|              |                                     |          | mn        | 1095.00 | 3.89  |      |
|              |                                     |          | sd        | 301.23  | 2.36  |      |
|              |                                     |          | 3psSD     |         | 1.29  |      |
|              |                                     |          | 3ngSD     |         | 7.08  |      |
|              |                                     |          | SumSD     |         | 8.37  |      |
|              |                                     |          | DiffMn    |         | 17.13 |      |
|              |                                     |          | SmovrDiff |         | 0.49  |      |
|              |                                     |          | 1minus    |         | 0.51  |      |
| 50056.00 G03 | M-003290- polo-like kina            | 5347.00  | PLK1 SMAF | 310.00  | 19.03 |      |
| 50056.00 H03 | M-003290- polo-like kina            | 5347.00  | PLK1 SMAF | 136.00  | 11.77 |      |
| 50056.00 I03 | D-001206- siControl non-targeting s |          |           | 4529.00 | 10.86 |      |
| 50056.00 J03 | D-001206- siControl non-targeting s |          |           | 1858.00 | 6.08  |      |
| 50056.00 K03 | D-001600- ( siGLO RISC-free siRNA   |          |           | 4638.00 | 9.38  |      |
| 50056.00 L03 | D-001600- ( siGLO RISC-free siRNA   |          |           | 4347.00 | 15.39 |      |

| rZ    | Cell Count | % inf | Abs Dev | rZ    | Cell Count | % inf | Abs Dev | rZ    |
|-------|------------|-------|---------|-------|------------|-------|---------|-------|
| 0.99  | 1546.00    | 9.90  | 4.30    | 1.08  | 1035.00    | 3.19  | 0.19    | 0.08  |
| 0.36  | 2050.00    | 5.90  | 0.30    | 0.08  | 1822.00    | 1.32  | 1.68    | -0.70 |
| 3.41  | 2101.00    | 10.00 | 4.40    | 1.10  | 764.00     | 6.54  | 3.54    | 1.48  |
| -0.27 | 1000.00    | 3.00  | 2.60    | -0.65 | 1073.00    | 0.65  | 2.35    | -0.98 |
| -0.22 | 1916.00    | 4.18  | 1.42    | -0.36 | 1723.00    | 3.37  | 0.37    | 0.15  |
| 1.34  | 2474.00    | 6.99  | 1.39    | 0.35  | 2420.00    | 2.02  | 0.98    | -0.41 |
| 0.15  | 1590.00    | 3.08  | 2.52    | -0.63 | 573.00     | 5.76  | 2.76    | 1.15  |
| 2.88  | 2629.00    | 7.57  | 1.97    | 0.49  | 1574.00    | 5.40  | 2.40    | 1.00  |
| 1.78  | 797.00     | 10.92 | 5.32    | 1.33  | 656.00     | 3.81  | 0.81    | 0.34  |
| 1.25  | 2659.00    | 3.23  | 2.37    | -0.59 | 2034.00    | 1.38  | 1.62    | -0.68 |
| 0.48  | 894.00     | 9.40  | 3.80    | 0.95  | 1326.00    | 3.39  | 0.39    | 0.16  |
| 1.03  | 2565.00    | 3.08  | 2.52    | -0.63 | 2086.00    | 2.21  | 0.79    | -0.33 |
| 0.69  | 3447.00    | 6.35  | 0.75    | 0.19  | 1313.00    | 6.40  | 3.40    | 1.42  |
| 1.91  | 1295.00    | 7.72  | 2.12    | 0.53  | 742.00     | 7.01  | 4.01    | 1.67  |
| 0.34  | 2477.00    | 2.46  | 3.14    | -0.79 | 1686.00    | 1.07  | 1.93    | -0.81 |
| 0.96  | 2162.00    | 6.20  | 0.60    | 0.15  | 1224.00    | 5.23  | 2.23    | 0.93  |
| 1.50  | 1822.00    | 5.82  | 0.22    | 0.06  | 1756.00    | 2.45  | 0.55    | -0.23 |
| -0.26 | 1047.00    | 3.92  | 1.68    | -0.42 | 1709.00    | 2.81  | 0.19    | -0.08 |
| -0.32 | 1013.00    | 2.47  | 3.13    | -0.78 | 1428.00    | 1.96  | 1.04    | -0.43 |
| 0.59  | 1053.00    | 1.42  | 4.18    | -1.05 | 1222.00    | 1.31  | 1.69    | -0.71 |
| 1.38  | 1352.00    | 0.59  | 5.01    | -1.25 | 1088.00    | 5.06  | 2.06    | 0.86  |
| 0.17  | 2187.00    | 1.55  | 4.05    | -1.01 | 1906.00    | 4.20  | 1.20    | 0.50  |
| 0.08  | 2881.00    | 1.80  | 3.80    | -0.95 | 1576.00    | 4.12  | 1.12    | 0.47  |
| 0.73  | 2713.00    | 2.36  | 3.24    | -0.81 | 3081.00    | 6.49  | 3.49    | 1.46  |
| -0.36 | 2198.00    | 0.59  | 5.01    | -1.25 | 1830.00    | 3.44  | 0.44    | 0.18  |
| 0.02  | 1616.00    | 4.83  | 0.77    | -0.19 | 1427.00    | 3.29  | 0.29    | 0.12  |
| -0.26 | 2631.00    | 2.43  | 3.17    | -0.79 | 1732.00    | 4.04  | 1.04    | 0.43  |
| -0.30 | 1743.00    | 3.21  | 2.39    | -0.60 | 1254.00    | 1.12  | 1.88    | -0.79 |
| -0.60 | 2463.00    | 3.09  | 2.51    | -0.63 | 1190.00    | 3.95  | 0.95    | 0.40  |
| 0.21  | 1826.00    | 5.20  | 0.40    | -0.10 | 2545.00    | 8.88  | 5.88    | 2.45  |
| -1.01 | 2599.00    | 0.73  | 4.87    | -1.22 | 2396.00    | 2.50  | 0.50    | -0.21 |
| -0.30 | 1128.00    | 2.39  | 3.21    | -0.80 | 882.00     | 1.47  | 1.53    | -0.64 |
| 0.39  | 2164.00    | 5.04  | 0.56    | -0.14 | 1552.00    | 3.87  | 0.87    | 0.36  |
| -1.23 | 2695.00    | 1.60  | 4.00    | -1.00 | 1437.00    | 2.64  | 0.36    | -0.15 |
| -0.91 | 2073.00    | 6.27  | 0.67    | 0.17  | 1882.00    | 2.44  | 0.56    | -0.23 |
| -0.30 | 3500.00    | 5.14  | 0.46    | -0.11 | 2159.00    | 2.32  | 0.68    | -0.29 |
| -0.81 | 3422.00    | 5.20  | 0.40    | -0.10 | 4308.00    | 4.64  | 1.64    | 0.69  |
| 0.54  | 2457.00    | 3.05  | 2.55    | -0.64 | 3892.00    | 7.37  | 4.37    | 1.83  |
| -0.57 | 2242.00    | 2.50  | 3.10    | -0.78 | 3733.00    | 2.76  | 0.24    | -0.10 |
| -0.82 | 1837.00    | 2.29  | 3.31    | -0.83 | 2091.00    | 1.05  | 1.95    | -0.81 |
| 1.42  | 2358.00    | 24.81 | 19.21   | 4.81  | 1662.00    | 18.89 | 15.89   | 6.64  |
| -1.04 | 3133.00    | 7.47  | 1.87    | 0.47  | 2294.00    | 7.50  | 4.50    | 1.88  |
| -0.04 | 2938.00    | 16.61 | 11.01   | 2.76  | 2412.00    | 9.25  | 6.25    | 2.61  |

|       |         |       |      |       |         |       |       |       |
|-------|---------|-------|------|-------|---------|-------|-------|-------|
| -0.41 | 2159.00 | 7.46  | 1.86 | 0.47  | 2673.00 | 4.75  | 1.75  | 0.73  |
| -0.30 | 2072.00 | 10.18 | 4.58 | 1.15  | 1695.00 | 11.03 | 8.03  | 3.35  |
| -1.16 | 3272.00 | 9.69  | 4.09 | 1.03  | 2513.00 | 5.93  | 2.93  | 1.22  |
| -1.23 | 3648.00 | 4.17  | 1.43 | -0.36 | 2954.00 | 2.17  | 0.83  | -0.35 |
| -1.15 | 2920.00 | 5.55  | 0.05 | -0.01 | 1627.00 | 4.73  | 1.73  | 0.72  |
| -1.16 | 2564.00 | 10.84 | 5.24 | 1.31  | 2391.00 | 6.61  | 3.61  | 1.51  |
| -1.16 | 1270.00 | 4.25  | 1.35 | -0.34 | 2041.00 | 3.18  | 0.18  | 0.08  |
| -1.23 | 1580.00 | 3.42  | 2.18 | -0.55 | 2528.00 | 3.80  | 0.80  | 0.33  |
| -0.73 | 1503.00 | 6.45  | 0.85 | 0.21  | 1668.00 | 6.18  | 3.18  | 1.33  |
| -1.17 | 2647.00 | 7.25  | 1.65 | 0.42  | 2351.00 | 2.42  | 0.58  | -0.24 |
| -1.33 | 1503.00 | 1.33  | 4.27 | -1.07 | 1288.00 | 1.79  | 1.21  | -0.51 |
| -1.07 | 2362.00 | 2.84  | 2.76 | -0.69 | 2101.00 | 0.81  | 2.19  | -0.92 |
| -1.21 | 1537.00 | 4.81  | 0.79 | -0.20 | 2706.00 | 1.92  | 1.08  | -0.45 |
| -0.77 | 2182.00 | 8.34  | 2.74 | 0.69  | 1669.00 | 6.89  | 3.89  | 1.62  |
| -1.04 | 2566.00 | 4.56  | 1.04 | -0.26 | 2164.00 | 1.89  | 1.11  | -0.46 |
| -1.23 | 2816.00 | 3.69  | 1.91 | -0.48 | 2819.00 | 1.88  | 1.12  | -0.47 |
| -1.14 | 2310.00 | 3.55  | 2.05 | -0.51 | 1450.00 | 1.38  | 1.62  | -0.68 |
| -0.12 | 3759.00 | 3.91  | 1.69 | -0.42 | 2676.00 | 4.63  | 1.63  | 0.68  |
| 0.26  | 3712.00 | 5.50  | 0.10 | -0.03 | 2990.00 | 7.12  | 4.12  | 1.72  |
| 3.69  | 2527.00 | 10.72 | 5.12 | 1.28  | 3354.00 | 21.14 | 18.14 | 7.57  |
| -0.17 | 3320.00 | 2.92  | 2.68 | -0.67 | 2728.00 | 4.22  | 1.22  | 0.51  |
| -0.66 | 2715.00 | 2.14  | 3.46 | -0.87 | 2607.00 | 3.87  | 0.87  | 0.36  |
| 0.61  | 3766.00 | 7.25  | 1.65 | 0.41  | 2033.00 | 4.43  | 1.43  | 0.60  |
| -0.01 | 2409.00 | 2.37  | 3.23 | -0.81 | 1862.00 | 2.58  | 0.42  | -0.18 |
| 0.89  | 3638.00 | 5.00  | 0.60 | -0.15 | 2425.00 | 2.35  | 0.65  | -0.27 |
| 0.22  | 3513.00 | 4.36  | 1.24 | -0.31 | 3244.00 | 4.25  | 1.25  | 0.52  |
| -1.13 | 2629.00 | 1.94  | 3.66 | -0.92 | 1158.00 | 0.95  | 2.05  | -0.86 |
| 0.32  | 4846.00 | 6.19  | 0.59 | 0.15  | 3297.00 | 6.79  | 3.79  | 1.58  |
| 0.26  | 1911.00 | 3.40  | 2.20 | -0.55 | 1467.00 | 3.41  | 0.41  | 0.17  |
| 0.01  | 2124.00 | 4.76  | 0.84 | -0.21 | 471.00  | 1.27  | 1.73  | -0.72 |
| 1.04  | 4244.00 | 8.29  | 2.69 | 0.68  | 2159.00 | 8.75  | 5.75  | 2.40  |
| -0.50 | 2277.00 | 1.80  | 3.80 | -0.95 | 1466.00 | 1.36  | 1.64  | -0.68 |
| -0.70 | 4653.00 | 1.10  | 4.50 | -1.13 | 2548.00 | 1.88  | 1.12  | -0.47 |
| 0.03  | 2501.00 | 1.56  | 4.04 | -1.01 | 2247.00 | 1.87  | 1.13  | -0.47 |
| -0.23 | 3311.00 | 2.90  | 2.70 | -0.68 | 2284.00 | 3.63  | 0.63  | 0.26  |
| -1.03 | 3026.00 | 3.04  | 2.56 | -0.64 | 2162.00 | 1.20  | 1.80  | -0.75 |
| -1.23 | 2411.00 | 1.78  | 3.82 | -0.96 | 1023.00 | 1.47  | 1.53  | -0.64 |
| 1.19  | 3361.00 | 4.58  | 1.02 | -0.25 | 2887.00 | 2.63  | 0.37  | -0.15 |
| 0.69  | 1265.00 | 0.79  | 4.81 | -1.20 | 1167.00 | 1.63  | 1.37  | -0.57 |
| 0.59  | 2277.00 | 5.62  | 0.02 | 0.01  | 2875.00 | 2.96  | 0.04  | -0.02 |
| -0.44 | 2134.00 | 2.44  | 3.16 | -0.79 | 2016.00 | 0.55  | 2.45  | -1.03 |
| 0.13  | 1613.00 | 2.98  | 2.62 | -0.66 | 2826.00 | 2.65  | 0.35  | -0.15 |
| -0.08 | 1516.00 | 2.97  | 2.63 | -0.66 | 1302.00 | 3.00  | 0.00  | 0.00  |
| -0.92 | 1351.00 | 1.55  | 4.05 | -1.01 | 1294.00 | 1.39  | 1.61  | -0.67 |

|       |         |       |       |       |         |      |      |       |
|-------|---------|-------|-------|-------|---------|------|------|-------|
| -0.06 | 1089.00 | 4.96  | 0.64  | -0.16 | 1663.00 | 3.01 | 0.01 | 0.00  |
| 1.60  | 1662.00 | 4.63  | 0.97  | -0.24 | 2306.00 | 3.77 | 0.77 | 0.32  |
| -1.07 | 788.00  | 0.89  | 4.71  | -1.18 | 1561.00 | 3.01 | 0.01 | 0.00  |
| -0.57 | 539.00  | 3.15  | 2.45  | -0.61 | 1297.00 | 2.70 | 0.30 | -0.13 |
| -0.99 | 939.00  | 3.19  | 2.41  | -0.60 | 1774.00 | 3.78 | 0.78 | 0.32  |
| -0.71 | 1106.00 | 2.89  | 2.71  | -0.68 | 1166.00 | 2.14 | 0.86 | -0.36 |
| -0.91 | 2444.00 | 1.80  | 3.80  | -0.95 | 2490.00 | 0.96 | 2.04 | -0.85 |
| -1.22 | 1614.00 | 3.28  | 2.32  | -0.58 | 1762.00 | 4.26 | 1.26 | 0.52  |
| -1.21 | 940.00  | 0.74  | 4.86  | -1.22 | 1834.00 | 2.84 | 0.16 | -0.07 |
| -0.99 | 2048.00 | 2.83  | 2.77  | -0.69 | 2982.00 | 3.52 | 0.52 | 0.22  |
| -1.19 | 490.00  | 2.24  | 3.36  | -0.84 | 751.00  | 0.80 | 2.20 | -0.92 |
| -1.21 | 1739.00 | 2.42  | 3.18  | -0.80 | 1881.00 | 2.82 | 0.18 | -0.08 |
| -1.14 | 1305.00 | 1.38  | 4.22  | -1.06 | 1959.00 | 2.04 | 0.96 | -0.40 |
| -0.51 | 4191.00 | 3.36  | 2.24  | -0.56 | 3562.00 | 1.57 | 1.43 | -0.60 |
| -0.68 | 3582.00 | 3.29  | 2.31  | -0.58 | 2465.00 | 1.10 | 1.90 | -0.80 |
| -0.19 | 2780.00 | 2.27  | 3.33  | -0.83 | 3671.00 | 3.05 | 0.05 | 0.02  |
| 0.09  | 3549.00 | 7.19  | 1.59  | 0.40  | 3222.00 | 4.62 | 1.62 | 0.68  |
| -0.38 | 2320.00 | 3.71  | 1.89  | -0.47 | 2120.00 | 1.84 | 1.16 | -0.49 |
| -0.96 | 2650.00 | 5.92  | 0.32  | 0.08  | 1816.00 | 1.87 | 1.13 | -0.47 |
| -0.69 | 3048.00 | 8.50  | 2.90  | 0.73  | 2327.00 | 1.59 | 1.41 | -0.59 |
| 0.14  | 2626.00 | 8.07  | 2.47  | 0.62  | 1763.00 | 1.93 | 1.07 | -0.45 |
| 2.09  | 3919.00 | 13.83 | 8.23  | 2.06  | 3527.00 | 6.58 | 3.58 | 1.49  |
| -0.21 | 2046.00 | 6.11  | 0.51  | 0.13  | 2052.00 | 1.56 | 1.44 | -0.60 |
| 0.78  | 2955.00 | 13.40 | 7.80  | 1.96  | 2251.00 | 7.02 | 4.02 | 1.68  |
| -0.11 | 2686.00 | 6.07  | 0.47  | 0.12  | 1489.00 | 0.94 | 2.06 | -0.86 |
| -0.02 | 2823.00 | 8.82  | 3.22  | 0.81  | 1901.00 | 1.32 | 1.68 | -0.70 |
| -1.28 | 2065.00 | 5.96  | 0.36  | 0.09  | 1703.00 | 1.35 | 1.65 | -0.69 |
| 0.01  | 2533.00 | 4.62  | 0.98  | -0.24 | 3758.00 | 4.07 | 1.07 | 0.45  |
| 2.39  | 2823.00 | 14.88 | 9.28  | 2.33  | 3634.00 | 8.15 | 5.15 | 2.15  |
| -0.05 | 2943.00 | 10.26 | 4.66  | 1.17  | 3634.00 | 6.47 | 3.47 | 1.45  |
| -0.46 | 2345.00 | 5.88  | 0.28  | 0.07  | 1778.00 | 2.31 | 0.69 | -0.29 |
| 0.29  | 3126.00 | 6.05  | 0.45  | 0.11  | 2028.00 | 5.03 | 2.03 | 0.85  |
| -0.91 | 2183.00 | 7.47  | 1.87  | 0.47  | 1746.00 | 3.26 | 0.26 | 0.11  |
| -0.37 | 1454.00 | 2.54  | 3.06  | -0.76 | 1593.00 | 0.06 | 2.94 | -1.23 |
| 0.17  | 4546.00 | 4.91  | 0.69  | -0.17 | 3526.00 | 1.73 | 1.27 | -0.53 |
| 0.51  | 4433.00 | 5.57  | 0.03  | -0.01 | 2528.00 | 1.38 | 1.62 | -0.68 |
| 0.35  | 3756.00 | 3.99  | 1.61  | -0.40 | 2587.00 | 0.89 | 2.11 | -0.88 |
| 4.68  | 3451.00 | 5.39  | 0.21  | -0.05 | 1316.00 | 0.30 | 2.70 | -1.13 |
| 1.15  | 2255.00 | 6.39  | 0.79  | 0.20  | 1468.00 | 2.38 | 0.62 | -0.26 |
| 0.74  | 2619.00 | 3.47  | 2.13  | -0.53 | 2077.00 | 2.74 | 0.26 | -0.11 |
| 1.00  | 2572.00 | 5.83  | 0.23  | 0.06  | 2569.00 | 1.95 | 1.05 | -0.44 |
| 3.71  | 1201.00 | 17.57 | 11.97 | 3.00  | 517.00  | 7.74 | 4.74 | 1.98  |
| 0.52  | 1421.00 | 5.42  | 0.18  | -0.04 | 1028.00 | 1.36 | 1.64 | -0.68 |
| 1.47  | 3078.00 | 3.41  | 2.19  | -0.55 | 1826.00 | 1.42 | 1.58 | -0.66 |

|       |         |       |       |       |         |       |       |       |
|-------|---------|-------|-------|-------|---------|-------|-------|-------|
| 1.13  | 3090.00 | 4.63  | 0.97  | -0.24 | 2330.00 | 0.52  | 2.48  | -1.04 |
| 0.01  | 2714.00 | 1.40  | 4.20  | -1.05 | 2146.00 | 1.17  | 1.84  | -0.77 |
| 0.04  | 2881.00 | 3.16  | 2.44  | -0.61 | 3290.00 | 2.10  | 0.90  | -0.38 |
| 0.45  | 2197.00 | 2.69  | 2.91  | -0.73 | 1915.00 | 1.36  | 1.64  | -0.69 |
| -0.49 | 2954.00 | 1.76  | 3.84  | -0.96 | 3221.00 | 1.80  | 1.20  | -0.50 |
| 1.15  | 3080.00 | 2.95  | 2.65  | -0.66 | 1680.00 | 1.85  | 1.15  | -0.48 |
| 0.63  | 3812.00 | 1.99  | 3.61  | -0.90 | 2357.00 | 0.68  | 2.32  | -0.97 |
| 1.72  | 4780.00 | 7.15  | 1.55  | 0.39  | 2738.00 | 1.17  | 1.83  | -0.77 |
| 0.96  | 2725.00 | 2.83  | 2.77  | -0.69 | 2595.00 | 1.31  | 1.69  | -0.71 |
| -0.05 | 3724.00 | 6.74  | 1.14  | 0.29  | 3124.00 | 2.14  | 0.86  | -0.36 |
| 0.26  | 3170.00 | 9.05  | 3.45  | 0.87  | 2067.00 | 2.81  | 0.19  | -0.08 |
| 0.46  | 2312.00 | 6.31  | 0.71  | 0.18  | 1704.00 | 1.23  | 1.77  | -0.74 |
| 0.55  | 3160.00 | 4.91  | 0.69  | -0.17 | 2340.00 | 2.39  | 0.61  | -0.25 |
| 0.49  | 1523.00 | 4.66  | 0.94  | -0.23 | 816.00  | 0.49  | 2.51  | -1.05 |
| 1.42  | 3062.00 | 10.42 | 4.82  | 1.21  | 2395.00 | 3.84  | 0.84  | 0.35  |
| 1.31  | 2748.00 | 8.12  | 2.52  | 0.63  | 2853.00 | 3.33  | 0.33  | 0.14  |
| 0.33  | 2184.00 | 10.85 | 5.25  | 1.32  | 2343.00 | 2.94  | 0.06  | -0.02 |
| 0.31  | 3274.00 | 6.26  | 0.66  | 0.17  | 1944.00 | 2.88  | 0.12  | -0.05 |
| -0.41 | 1510.00 | 4.64  | 0.96  | -0.24 | 1029.00 | 2.04  | 0.96  | -0.40 |
| 0.47  | 3236.00 | 10.94 | 5.34  | 1.34  | 2424.00 | 3.75  | 0.75  | 0.31  |
| 1.65  | 1568.00 | 8.67  | 3.07  | 0.77  | 1389.00 | 4.46  | 1.46  | 0.61  |
| 0.20  | 2045.00 | 4.50  | 1.10  | -0.28 | 1925.00 | 3.43  | 0.43  | 0.18  |
| 0.24  | 2316.00 | 6.39  | 0.79  | 0.20  | 1972.00 | 1.57  | 1.43  | -0.60 |
| -0.10 | 2994.00 | 7.58  | 1.98  | 0.50  | 1768.00 | 2.09  | 0.91  | -0.38 |
| -0.34 | 2707.00 | 5.28  | 0.32  | -0.08 | 2155.00 | 2.92  | 0.08  | -0.03 |
| 1.37  | 3415.00 | 15.02 | 9.42  | 2.36  | 1173.00 | 1.19  | 1.81  | -0.76 |
| -0.21 | 3808.00 | 10.61 | 5.01  | 1.26  | 2098.00 | 2.62  | 0.38  | -0.16 |
| 0.80  | 3966.00 | 20.55 | 14.95 | 3.75  | 3149.00 | 3.94  | 0.94  | 0.39  |
| 0.42  | 3353.00 | 9.84  | 4.24  | 1.06  | 2868.00 | 3.35  | 0.35  | 0.14  |
| 0.79  | 2474.00 | 14.63 | 9.03  | 2.26  | 2598.00 | 5.12  | 2.12  | 0.88  |
| 0.66  | 3006.00 | 18.83 | 13.23 | 3.32  | 2407.00 | 5.77  | 2.77  | 1.16  |
| 1.50  | 3791.00 | 21.00 | 15.40 | 3.86  | 3419.00 | 14.95 | 11.95 | 4.99  |
| 0.61  | 3612.00 | 16.75 | 11.15 | 2.80  | 2773.00 | 4.54  | 1.54  | 0.64  |
| 1.14  | 3998.00 | 16.33 | 10.73 | 2.69  | 1887.00 | 3.60  | 0.60  | 0.25  |
| 1.85  | 2872.00 | 7.45  | 1.85  | 0.46  | 2497.00 | 3.40  | 0.40  | 0.17  |
| 0.53  | 2155.00 | 11.74 | 6.14  | 1.54  | 2755.00 | 8.09  | 5.09  | 2.13  |
| 0.88  | 2784.00 | 17.57 | 11.97 | 3.00  | 2020.00 | 7.72  | 4.72  | 1.97  |
| 1.26  | 1119.00 | 9.65  | 4.05  | 1.02  | 1497.00 | 6.48  | 3.48  | 1.45  |
| 0.48  | 2276.00 | 11.95 | 6.35  | 1.59  | 2008.00 | 5.53  | 2.53  | 1.05  |
| -0.12 | 2386.00 | 8.30  | 2.70  | 0.68  | 1569.00 | 3.44  | 0.44  | 0.18  |
| 1.03  | 2112.00 | 11.70 | 6.10  | 1.53  | 1710.00 | 6.20  | 3.20  | 1.34  |
| 0.33  | 2525.00 | 10.34 | 4.74  | 1.19  | 1029.00 | 5.25  | 2.25  | 0.94  |
| 0.53  | 2788.00 | 5.92  | 0.32  | 0.08  | 2799.00 | 6.57  | 3.57  | 1.49  |
| 1.18  | 3959.00 | 9.62  | 4.02  | 1.01  | 1808.00 | 2.65  | 0.35  | -0.14 |

|       |         |       |       |       |         |       |       |       |
|-------|---------|-------|-------|-------|---------|-------|-------|-------|
| 1.20  | 1719.00 | 5.24  | 0.36  | -0.09 | 1640.00 | 10.31 | 7.31  | 3.05  |
| 1.31  | 3141.00 | 5.19  | 0.41  | -0.10 | 1514.00 | 5.48  | 2.48  | 1.04  |
| 1.01  | 4261.00 | 10.33 | 4.73  | 1.19  | 2866.00 | 10.89 | 7.89  | 3.29  |
| 0.54  | 2615.00 | 5.35  | 0.25  | -0.06 | 1080.00 | 5.56  | 2.56  | 1.07  |
| 1.17  | 2162.00 | 2.41  | 3.19  | -0.80 | 1540.00 | 6.17  | 3.17  | 1.32  |
| -0.86 | 2209.00 | 8.01  | 2.41  | 0.61  | 2905.00 | 3.20  | 0.20  | 0.08  |
| -0.46 | 2546.00 | 6.09  | 0.49  | 0.12  | 1376.00 | 0.29  | 2.71  | -1.13 |
| -0.27 | 4257.00 | 14.82 | 9.22  | 2.31  | 2329.00 | 5.84  | 2.84  | 1.18  |
| 0.23  | 4518.00 | 9.94  | 4.34  | 1.09  | 2870.00 | 3.69  | 0.69  | 0.29  |
| -0.95 | 1810.00 | 4.31  | 1.29  | -0.32 | 1540.00 | 1.69  | 1.31  | -0.55 |
| -0.45 | 2267.00 | 3.75  | 1.85  | -0.46 | 2074.00 | 3.71  | 0.71  | 0.30  |
| -0.95 | 1878.00 | 4.21  | 1.39  | -0.35 | 1502.00 | 3.26  | 0.26  | 0.11  |
| -1.15 | 1949.00 | 2.36  | 3.24  | -0.81 | 1406.00 | 0.85  | 2.15  | -0.90 |
| 0.58  | 1873.00 | 5.93  | 0.33  | 0.08  | 2081.00 | 5.38  | 2.38  | 0.99  |
| -0.02 | 2479.00 | 5.97  | 0.37  | 0.09  | 1893.00 | 4.91  | 1.91  | 0.80  |
| -0.41 | 2867.00 | 2.55  | 3.05  | -0.76 | 1798.00 | 1.45  | 1.55  | -0.65 |
| -0.75 | 2360.00 | 3.56  | 2.04  | -0.51 | 2386.00 | 4.74  | 1.74  | 0.72  |
| 1.15  | 3505.00 | 10.01 | 4.41  | 1.11  | 3534.00 | 13.84 | 10.84 | 4.52  |
| 0.60  | 3053.00 | 6.68  | 1.08  | 0.27  | 2574.00 | 8.43  | 5.43  | 2.27  |
| -0.67 | 2456.00 | 1.75  | 3.85  | -0.96 | 2144.00 | 1.59  | 1.41  | -0.59 |
| -0.22 | 3365.00 | 9.09  | 3.49  | 0.88  | 2550.00 | 4.98  | 1.98  | 0.83  |
| -0.46 | 3296.00 | 4.61  | 0.99  | -0.25 | 1495.00 | 1.54  | 1.46  | -0.61 |
| 0.46  | 3789.00 | 6.49  | 0.89  | 0.22  | 3202.00 | 4.22  | 1.22  | 0.51  |
| 0.40  | 4819.00 | 4.79  | 0.81  | -0.20 | 4114.00 | 5.13  | 2.13  | 0.89  |
| -0.50 | 2861.00 | 4.96  | 0.64  | -0.16 | 2119.00 | 3.30  | 0.30  | 0.13  |
| 1.46  | 2545.00 | 9.98  | 4.38  | 1.10  | 2801.00 | 4.53  | 1.53  | 0.64  |
| -0.49 | 1734.00 | 17.13 | 11.53 | 2.89  | 758.00  | 5.94  | 2.94  | 1.23  |
| 0.62  | 4082.00 | 16.78 | 11.18 | 2.80  | 2233.00 | 5.82  | 2.82  | 1.18  |
| -0.02 | 3227.00 | 7.59  | 1.99  | 0.50  | 2167.00 | 2.35  | 0.65  | -0.27 |
| 1.86  | 2322.00 | 17.05 | 11.45 | 2.87  | 2174.00 | 11.22 | 8.22  | 3.43  |
| -0.30 | 3086.00 | 10.14 | 4.54  | 1.14  | 2066.00 | 9.83  | 6.83  | 2.85  |
| -0.29 | 2843.00 | 10.87 | 5.27  | 1.32  | 947.00  | 1.58  | 1.42  | -0.59 |
| -0.10 | 4451.00 | 12.78 | 7.18  | 1.80  | 2186.00 | 6.54  | 3.54  | 1.48  |
| -0.70 | 2188.00 | 4.16  | 1.44  | -0.36 | 757.00  | 5.02  | 2.02  | 0.84  |
| -0.28 | 3169.00 | 10.26 | 4.66  | 1.17  | 1147.00 | 2.44  | 0.56  | -0.23 |
| -0.44 | 1437.00 | 12.80 | 7.20  | 1.81  | 792.00  | 6.69  | 3.69  | 1.54  |
| -0.14 | 2603.00 | 9.22  | 3.62  | 0.91  | 1362.00 | 3.38  | 0.38  | 0.16  |
| 0.10  | 3519.00 | 9.66  | 4.06  | 1.02  | 1751.00 | 7.37  | 4.37  | 1.82  |
| 0.48  | 2097.00 | 6.44  | 0.84  | 0.21  | 1391.00 | 7.48  | 4.48  | 1.87  |
| 0.05  | 3608.00 | 9.84  | 4.24  | 1.06  | 1246.00 | 7.78  | 4.78  | 2.00  |
| -0.47 | 2529.00 | 6.68  | 1.08  | 0.27  | 922.00  | 4.12  | 1.12  | 0.47  |
| -0.72 | 3024.00 | 3.84  | 1.76  | -0.44 | 1172.00 | 1.88  | 1.12  | -0.47 |
| 3.36  | 4212.00 | 11.61 | 6.01  | 1.51  | 1886.00 | 12.88 | 9.88  | 4.13  |
| 0.48  | 2499.00 | 3.92  | 1.68  | -0.42 | 1297.00 | 3.32  | 0.32  | 0.13  |

|       |         |       |       |       |         |       |       |       |
|-------|---------|-------|-------|-------|---------|-------|-------|-------|
| 0.06  | 1512.00 | 4.89  | 0.71  | -0.18 | 812.00  | 5.91  | 2.91  | 1.21  |
| -0.99 | 1702.00 | 3.53  | 2.07  | -0.52 | 1557.00 | 2.83  | 0.17  | -0.07 |
| 1.32  | 4406.00 | 17.05 | 11.45 | 2.87  | 2015.00 | 8.19  | 5.19  | 2.17  |
| -0.78 | 3753.00 | 4.16  | 1.44  | -0.36 | 2242.00 | 0.31  | 2.69  | -1.12 |
| 1.50  | 4083.00 | 15.33 | 9.73  | 2.44  | 3033.00 | 13.72 | 10.72 | 4.47  |
| 0.64  | 2234.00 | 4.48  | 1.12  | -0.28 | 2610.00 | 8.24  | 5.24  | 2.19  |
| 0.96  | 2814.00 | 13.50 | 7.90  | 1.98  | 2086.00 | 7.96  | 4.96  | 2.07  |
| 0.41  | 3471.00 | 8.70  | 3.10  | 0.78  | 2652.00 | 5.13  | 2.13  | 0.89  |
| 1.12  | 1750.00 | 10.86 | 5.26  | 1.32  | 1368.00 | 4.31  | 1.31  | 0.55  |
| -0.09 | 1691.00 | 5.56  | 0.04  | -0.01 | 1518.00 | 3.49  | 0.49  | 0.20  |
| 0.75  | 2523.00 | 11.18 | 5.58  | 1.40  | 1783.00 | 3.81  | 0.81  | 0.34  |
| 1.58  | 1512.00 | 9.33  | 3.73  | 0.93  | 2076.00 | 6.36  | 3.36  | 1.40  |
| 1.44  | 1576.00 | 4.12  | 1.48  | -0.37 | 1584.00 | 2.90  | 0.10  | -0.04 |
| 2.35  | 1710.00 | 7.66  | 2.06  | 0.52  | 1679.00 | 3.81  | 0.81  | 0.34  |
| 2.07  | 1458.00 | 10.22 | 4.62  | 1.16  | 2218.00 | 3.65  | 0.65  | 0.27  |
| 0.54  | 2823.00 | 6.34  | 0.74  | 0.19  | 1884.00 | 0.85  | 2.15  | -0.90 |
| 1.43  | 3091.00 | 9.67  | 4.07  | 1.02  | 2261.00 | 2.48  | 0.52  | -0.22 |
| 3.61  | 3428.00 | 12.98 | 7.38  | 1.85  | 3543.00 | 6.18  | 3.18  | 1.33  |
| 1.47  | 3269.00 | 13.34 | 7.74  | 1.94  | 2585.00 | 3.98  | 0.98  | 0.41  |
| 1.60  | 1326.00 | 5.13  | 0.47  | -0.12 | 1784.00 | 2.91  | 0.09  | -0.04 |
| 0.06  | 1715.00 | 2.68  | 2.92  | -0.73 | 982.00  | 1.02  | 1.98  | -0.83 |
| -0.42 | 2029.00 | 7.24  | 1.64  | 0.41  | 1385.00 | 2.96  | 0.04  | -0.02 |
| -0.85 | 2329.00 | 5.93  | 0.33  | 0.08  | 1619.00 | 0.68  | 2.32  | -0.97 |
| 0.43  | 2770.00 | 10.04 | 4.44  | 1.11  | 2196.00 | 4.37  | 1.37  | 0.57  |
| -0.18 | 2384.00 | 10.86 | 5.26  | 1.32  | 1439.00 | 2.99  | 0.01  | -0.01 |
| -0.35 | 1879.00 | 11.28 | 5.68  | 1.43  | 1802.00 | 3.00  | 0.00  | 0.00  |
| -0.43 | 1747.00 | 10.02 | 4.42  | 1.11  | 1344.00 | 1.49  | 1.51  | -0.63 |
| -0.57 | 2276.00 | 11.03 | 5.43  | 1.36  | 1334.00 | 2.10  | 0.90  | -0.38 |
| -0.35 | 2932.00 | 13.95 | 8.35  | 2.09  | 2819.00 | 2.06  | 0.94  | -0.39 |
| -0.54 | 4046.00 | 11.15 | 5.55  | 1.39  | 1167.00 | 0.51  | 2.49  | -1.04 |
| -0.36 | 2148.00 | 11.83 | 6.23  | 1.56  | 1530.00 | 4.84  | 1.84  | 0.77  |
| -0.91 | 2172.00 | 6.26  | 0.66  | 0.17  | 2220.00 | 2.12  | 0.88  | -0.37 |
| -0.16 | 2806.00 | 10.62 | 5.02  | 1.26  | 1887.00 | 3.60  | 0.60  | 0.25  |
| 0.58  | 3629.00 | 20.92 | 15.32 | 3.84  | 2263.00 | 5.74  | 2.74  | 1.15  |
| -0.85 | 2710.00 | 5.68  | 0.08  | 0.02  | 2179.00 | 0.92  | 2.08  | -0.87 |
| -0.37 | 3189.00 | 5.42  | 0.18  | -0.04 | 1650.00 | 1.52  | 1.48  | -0.62 |
| 1.51  | 3088.00 | 15.58 | 9.98  | 2.50  | 2219.00 | 12.84 | 9.84  | 4.11  |
| 0.23  | 3554.00 | 9.17  | 3.57  | 0.90  | 2551.00 | 4.55  | 1.55  | 0.65  |
| 1.14  | 4149.00 | 12.56 | 6.96  | 1.74  | 2352.00 | 5.99  | 2.99  | 1.25  |
| 1.22  | 3040.00 | 6.25  | 0.65  | 0.16  | 1544.00 | 3.56  | 0.56  | 0.23  |
| 1.16  | 1488.00 | 8.33  | 2.73  | 0.69  | 1340.00 | 3.73  | 0.73  | 0.30  |
| 0.60  | 2806.00 | 11.23 | 5.63  | 1.41  | 1493.00 | 9.04  | 6.04  | 2.52  |
| 0.96  | 2068.00 | 11.56 | 5.96  | 1.49  | 1646.00 | 8.99  | 5.99  | 2.50  |
| 2.41  | 2791.00 | 14.80 | 9.20  | 2.31  | 1673.00 | 10.64 | 7.64  | 3.19  |



|       |         |       |       |       |         |       |       |       |
|-------|---------|-------|-------|-------|---------|-------|-------|-------|
| 2.41  | 2319.00 | 10.00 | 4.40  | 1.10  | 2552.00 | 12.15 | 9.15  | 3.82  |
| 3.40  | 2554.00 | 13.78 | 8.18  | 2.05  | 1802.00 | 14.21 | 11.21 | 4.68  |
| 0.31  | 3262.00 | 4.63  | 0.97  | -0.24 | 1666.00 | 3.48  | 0.48  | 0.20  |
| -0.46 | 3106.00 | 3.32  | 2.28  | -0.57 | 1718.00 | 4.48  | 1.48  | 0.62  |
| -0.13 | 2966.00 | 8.80  | 3.20  | 0.80  | 1536.00 | 3.78  | 0.78  | 0.32  |
| 3.70  | 3606.00 | 23.57 | 17.97 | 4.50  | 1452.00 | 9.50  | 6.50  | 2.72  |
| -0.24 | 1360.00 | 2.72  | 2.88  | -0.72 | 1225.00 | 3.27  | 0.27  | 0.11  |
| 1.83  | 2773.00 | 13.27 | 7.67  | 1.92  | 1974.00 | 6.64  | 3.64  | 1.52  |
| 0.21  | 2863.00 | 8.98  | 3.38  | 0.85  | 2309.00 | 4.20  | 1.20  | 0.50  |
| 0.58  | 2515.00 | 11.05 | 5.45  | 1.37  | 2809.00 | 4.81  | 1.81  | 0.75  |
| 0.56  | 3656.00 | 11.16 | 5.56  | 1.39  | 1970.00 | 5.18  | 2.18  | 0.91  |
| -0.19 | 4018.00 | 9.58  | 3.98  | 1.00  | 1410.00 | 1.49  | 1.51  | -0.63 |
| 0.90  | 1725.00 | 8.93  | 3.33  | 0.83  | 1297.00 | 2.78  | 0.22  | -0.09 |
| 3.49  | 2690.00 | 12.49 | 6.89  | 1.73  | 2561.00 | 6.25  | 3.25  | 1.36  |
| 2.57  | 3208.00 | 11.00 | 5.40  | 1.36  | 3534.00 | 6.73  | 3.73  | 1.56  |
| 0.33  | 1784.00 | 8.80  | 3.20  | 0.80  | 928.00  | 2.69  | 0.31  | -0.13 |
| -0.62 | 1500.00 | 3.67  | 1.93  | -0.48 | 718.00  | 0.42  | 2.58  | -1.08 |
| 1.59  | 2605.00 | 5.07  | 0.53  | -0.13 | 3210.00 | 4.83  | 1.83  | 0.76  |
| 0.64  | 1705.00 | 2.46  | 3.14  | -0.79 | 1279.00 | 3.21  | 0.21  | 0.09  |
| 0.37  | 1718.00 | 4.95  | 0.65  | -0.16 | 1656.00 | 2.23  | 0.77  | -0.32 |
| 0.61  | 1715.00 | 6.36  | 0.76  | 0.19  | 3387.00 | 3.31  | 0.31  | 0.13  |
| 0.35  | 2120.00 | 6.65  | 1.05  | 0.26  | 1946.00 | 0.87  | 2.13  | -0.89 |
| -0.78 | 2277.00 | 3.51  | 2.09  | -0.52 | 1188.00 | 0.76  | 2.24  | -0.94 |
| -0.52 | 2829.00 | 2.37  | 3.23  | -0.81 | 1532.00 | 1.70  | 1.30  | -0.54 |
| 0.71  | 3086.00 | 5.51  | 0.09  | -0.02 | 2443.00 | 2.09  | 0.91  | -0.38 |
| -0.93 | 1141.00 | 5.08  | 0.52  | -0.13 | 1315.00 | 1.60  | 1.40  | -0.59 |
| 0.58  | 2532.00 | 5.33  | 0.27  | -0.07 | 1650.00 | 4.00  | 1.00  | 0.42  |
| -0.59 | 1378.00 | 3.48  | 2.12  | -0.53 | 766.00  | 1.17  | 1.83  | -0.76 |
| -0.86 | 3186.00 | 3.11  | 2.49  | -0.62 | 2278.00 | 1.54  | 1.46  | -0.61 |
| -0.53 | 3015.00 | 9.05  | 3.45  | 0.87  | 1680.00 | 1.19  | 1.81  | -0.76 |
| -1.16 | 3464.00 | 1.62  | 3.98  | -1.00 | 1773.00 | 0.79  | 2.21  | -0.92 |
| -0.97 | 1697.00 | 3.71  | 1.89  | -0.47 | 1352.00 | 1.11  | 1.89  | -0.79 |
| -1.22 | 3569.00 | 0.67  | 4.93  | -1.23 | 1455.00 | 1.31  | 1.69  | -0.71 |
| -0.78 | 2839.00 | 3.52  | 2.08  | -0.52 | 1201.00 | 0.33  | 2.67  | -1.11 |
| -1.11 | 975.00  | 0.92  | 4.68  | -1.17 | 378.00  | 0.26  | 2.74  | -1.14 |
| -0.64 | 1678.00 | 2.80  | 2.80  | -0.70 | 592.00  | 0.34  | 2.66  | -1.11 |
| -0.24 | 1960.00 | 3.06  | 2.54  | -0.64 | 1113.00 | 0.45  | 2.55  | -1.07 |
| -0.43 | 713.00  | 11.08 | 5.48  | 1.37  | 732.00  | 1.78  | 1.22  | -0.51 |
| -0.47 | 1257.00 | 4.61  | 0.99  | -0.25 | 1985.00 | 3.07  | 0.07  | 0.03  |
| -0.72 | 1691.00 | 3.08  | 2.52  | -0.63 | 935.00  | 0.96  | 2.04  | -0.85 |
| -0.81 | 2342.00 | 8.41  | 2.81  | 0.71  | 1246.00 | 1.20  | 1.80  | -0.75 |
| -0.65 | 1074.00 | 3.54  | 2.06  | -0.52 | 611.00  | 1.96  | 1.04  | -0.43 |
| -1.13 | 1779.00 | 6.80  | 1.20  | 0.30  | 991.00  | 1.92  | 1.08  | -0.45 |
| -1.15 | 1027.00 | 3.99  | 1.61  | -0.40 | 660.00  | 0.76  | 2.24  | -0.94 |

|         |         |         |       |        |         |       |      |       |
|---------|---------|---------|-------|--------|---------|-------|------|-------|
| -1.24   | 451.00  | 6.21    | 0.61  | 0.15   | 945.00  | 0.95  | 2.05 | -0.86 |
| -1.20   | 959.00  | 7.30    | 1.70  | 0.43   | 615.00  | 1.14  | 1.86 | -0.78 |
| -1.07   | 1307.00 | 2.14    | 3.46  | -0.87  | 1505.00 | 0.53  | 2.47 | -1.03 |
| -1.00   | 877.00  | 4.45    | 1.15  | -0.29  | 465.00  | 1.08  | 1.92 | -0.80 |
| -1.14   | 2199.00 | 3.18    | 2.42  | -0.60  | 757.00  | 1.19  | 1.81 | -0.76 |
| -1.24   | 1363.00 | 3.82    | 1.78  | -0.45  | 954.00  | 0.31  | 2.69 | -1.12 |
| -1.25   | 2655.00 | 5.88    | 0.28  | 0.07   | 1360.00 | 0.44  | 2.56 | -1.07 |
| -1.20   | 1173.00 | 4.09    | 1.51  | -0.38  | 1723.00 | 0.70  | 2.30 | -0.96 |
| -1.31   | 2091.00 | 3.25    | 2.35  | -0.59  | 1272.00 | 0.31  | 2.69 | -1.12 |
| -1.23   | 2002.00 | 3.50    | 2.10  | -0.53  | 1294.00 | 0.46  | 2.54 | -1.06 |
| -1.27   | 2766.00 | 2.13    | 3.47  | -0.87  | 786.00  | 0.76  | 2.24 | -0.93 |
| -1.20   | 2025.00 | 2.22    | 3.38  | -0.85  | 482.00  | 0.41  | 2.59 | -1.08 |
| -1.36   | 943.00  | 0.00    | 5.60  | -1.40  | 1594.00 | 0.25  | 2.75 | -1.15 |
|         | 2508.00 | 5.60    | 2.70  |        | 1824.00 | 3.00  | 1.62 |       |
|         |         |         | 8.09  |        |         |       | 4.85 |       |
|         |         |         | 3.99  |        |         |       | 2.39 |       |
| 2498.00 | 36.87   |         |       |        | 925.00  | 14.16 |      |       |
| 3160.00 | 23.89   | 1317.00 | 26.20 |        |         |       |      |       |
| 838.00  | 23.03   | 1410.00 | 22.70 |        |         |       |      |       |
| 3153.00 | 45.13   | 2608.00 | 34.16 |        |         |       |      |       |
| 2412.25 | 32.23   | 1778.33 | 27.69 |        |         |       |      |       |
| 1094.45 | 10.68   | 720.02  | 5.88  |        |         |       |      |       |
| 1045.00 | 1.24    | 407.00  | 2.70  |        |         |       |      |       |
| 832.00  | 6.01    | 481.00  | 1.04  |        |         |       |      |       |
| 180.00  | 2.78    |         |       | 163.00 | 11.04   |       |      |       |
| 818.00  | 2.93    | 857.00  | 5.25  |        |         |       |      |       |
| 610.00  | 3.91    | 669.00  | 3.15  |        |         |       |      |       |
| 372.46  | 1.82    | 265.87  | 2.98  |        |         |       |      |       |
|         | 32.04   |         | 17.63 |        |         |       |      |       |
|         | 5.47    |         | 8.93  |        |         |       |      |       |
|         | 37.50   |         | 26.57 |        |         |       |      |       |
|         | 28.32   |         | 24.54 |        |         |       |      |       |
|         | 1.32    |         | 1.08  |        |         |       |      |       |
|         | -0.32   |         | -0.08 |        |         |       |      |       |
| 210.00  | 11.43   | 323.00  | 1.55  |        |         |       |      |       |
| 147.00  | 14.97   | 255.00  | 5.49  |        |         |       |      |       |
| 2876.00 | 16.17   | 2289.00 | 5.64  |        |         |       |      |       |
| 2612.00 | 13.63   | 1650.00 | 5.21  |        |         |       |      |       |
| 4105.00 | 14.08   | 2744.00 | 7.25  |        |         |       |      |       |
| 4692.00 | 16.97   | 3459.00 | 19.20 |        |         |       |      |       |

y

y



y

y

y



y

y

y

y

y

y



y  
y

y

| Plate    | Well | Gene                  | GeneID            | Cell Coun % inf | Abs Dev     |
|----------|------|-----------------------|-------------------|-----------------|-------------|
| 50057.00 | A02  | M-013713 proprotein   | 27344.00 PCSK1N   | 1734.00         | 7.90 3.38   |
| 50057.00 | A04  | M-012513 late cornifi | 26239.00 LCE2B    | 2514.00         | 5.33 0.81   |
| 50057.00 | A05  | M-012819 nuclear prc  | 26471.00 NUPR1    | 2378.00         | 6.39 1.87   |
| 50057.00 | A06  | M-020964 2-deoxyribi  | 51071.00 DERA     | 3148.00         | 7.75 3.23   |
| 50057.00 | A07  | M-030029 olfactory re | 26496.00 OR10A3   | 3417.00         | 6.88 2.36   |
| 50057.00 | A08  | M-007204 nitric oxide | 51070.00 NOSIP    | 2477.00         | 4.04 0.48   |
| 50057.00 | A09  | M-012465 nuclear pre  | 26502.00 NARF     | 2801.00         | 9.43 4.91   |
| 50057.00 | A10  | M-017261 mitochond    | 51069.00 MRPL2    | 3282.00         | 4.81 0.29   |
| 50057.00 | A11  | M-013584 fer-1-like 3 | 26509.00 FER1L3   | 3710.00         | 3.21 1.31   |
| 50057.00 | A12  | M-017172 NMD3 hor     | 51068.00 NMD3     | 3602.00         | 5.19 0.67   |
| 50057.00 | A13  | M-018242 fracture cal | 26515.00 FXC1     | 1975.00         | 2.33 2.19   |
| 50057.00 | A14  | M-020962 tyrosyl-tRN  | 51067.00 YARS2    | 819.00          | 2.81 1.71   |
| 50057.00 | A15  | M-009538 translocase  | 26517.00 TIMM13   | 1877.00         | 2.50 2.02   |
| 50057.00 | A16  | M-020960 chromosom    | 51066.00 C3orf32  | 2905.00         | 2.44 2.08   |
| 50057.00 | A17  | M-008209 translocase  | 26519.00 TIMM10   | 2789.00         | 3.30 1.22   |
| 50057.00 | A18  | M-020197 submaxillar  | 26952.00 SMR3A    | 3111.00         | 11.32 6.80  |
| 50057.00 | A19  | M-009572 translocase  | 26520.00 TIMM9    | 2567.00         | 2.84 1.68   |
| 50057.00 | A20  | M-024450 cat eye syn  | 27443.00 CECR2    | 1380.00         | 1.81 2.71   |
| 50057.00 | A21  | M-008491 translocase  | 26521.00 TIMM8B   | 2456.00         | 2.40 2.12   |
| 50057.00 | A23  | M-004638 eukaryotic   | 26523.00 EIF2C1   | 1986.00         | 1.51 3.01   |
| 50057.00 | B02  | M-014192 Tax1 (hum)   | 30851.00 TAX1BP3  | 4165.00         | 7.68 3.16   |
| 50057.00 | B04  | M-014200 cerebellar c | 30850.00 CDR2L    | 4075.00         | 4.49 0.03   |
| 50057.00 | B05  | M-007435 solute carri | 28231.00 SLCO4A1  | 3979.00         | 8.39 3.87   |
| 50057.00 | B06  | M-005213 cancer/testi | 30848.00 CTAG2    | 4609.00         | 19.42 14.90 |
| 50057.00 | B07  | M-007434 solute carri | 28232.00 SLCO3A1  | 3750.00         | 1.76 2.76   |
| 50057.00 | B08  | M-016660 EH-domain    | 30846.00 EHD2     | 4283.00         | 5.86 1.34   |
| 50057.00 | B09  | M-021187 solute carri | 28234.00 SLCO1B3  | 3857.00         | 4.82 0.30   |
| 50057.00 | B10  | M-004728 EH-domain    | 30845.00 EHD3     | 5076.00         | 8.02 3.50   |
| 50057.00 | B11  | M-020554 coiled-coil  | 28952.00 CCDC22   | 2011.00         | 3.38 1.14   |
| 50057.00 | B12  | M-010659 EH-domain    | 30844.00 EHD4     | 3073.00         | 8.46 3.94   |
| 50057.00 | B13  | M-019451 dexametha    | 28955.00 DEXI     | 3490.00         | 3.52 1.00   |
| 50057.00 | B14  | M-020513 deoxynucle   | 30836.00 DNTTIP2  | 2423.00         | 0.45 4.07   |
| 50057.00 | B15  | M-020556 mitogen-ac   | 28956.00 MAPBPIP  | 898.00          | 1.67 2.85   |
| 50057.00 | B16  | M-003468 CD209 mol    | 30835.00 CD209    | 4777.00         | 5.86 1.34   |
| 50057.00 | B17  | M-013492 mitochond    | 28957.00 MRPS28   | 2948.00         | 2.88 1.64   |
| 50057.00 | B18  | M-017359 zinc ribbon  | 30834.00 ZNRD1    | 3075.00         | 1.85 2.67   |
| 50057.00 | B19  | M-020558 coiled-coil  | 28958.00 CCDC56   | 3414.00         | 3.60 0.92   |
| 50057.00 | B20  | M-020511 5', 3'-nucl  | 30833.00 NT5C     | 3932.00         | 8.52 4.00   |
| 50057.00 | B21  | M-016783 transmembr   | 28959.00 TMEM176B | 3069.00         | 0.65 3.87   |
| 50057.00 | B23  | M-021338 decapping    | 28960.00 DCPS     | 3718.00         | 2.61 1.91   |
| 50057.00 | C02  | M-015056 cat eye syn  | 27440.00 CECR5    | 3331.00         | 4.41 0.11   |
| 50057.00 | C04  | M-014747 cat eye syn  | 27439.00 CECR6    | 1384.00         | 5.06 0.54   |
| 50057.00 | C05  | M-012485 tetraspanin  | 26526.00 TSPAN16  | 3340.00         | 10.69 6.17  |
| 50057.00 | C06  | M-008398 echinoderm   | 27436.00 EML4     | 4261.00         | 9.04 4.52   |

|              |                       |                      |         |       |      |
|--------------|-----------------------|----------------------|---------|-------|------|
| 50057.00 C07 | M-013384 DAZ associ   | 26528.00 DAZAP1      | 4043.00 | 7.89  | 3.37 |
| 50057.00 C08 | M-010035 polymerase   | 27434.00 POLM        | 4853.00 | 7.38  | 2.86 |
| 50057.00 C09 | M-015205 procollagen  | 26577.00 PCOLCE2     | 4005.00 | 6.29  | 1.77 |
| 50057.00 C10 | M-015292 torsin fami  | 27433.00 TOR2A       | 3555.00 | 6.27  | 1.75 |
| 50057.00 C11 | M-016553 myeloma o    | 26579.00 MYEOV       | 2311.00 | 7.23  | 2.71 |
| 50057.00 C12 | M-017193 methionine   | 27430.00 MAT2B       | 3540.00 | 6.92  | 2.40 |
| 50057.00 C13 | M-019904 double hon   | 26581.00 DUX5        | 1728.00 | 4.92  | 0.40 |
| 50057.00 C14 | M-018327 RUN and TI   | 27352.00 RUTBC3      | 3571.00 | 5.10  | 0.58 |
| 50057.00 C15 | M-021492 gremlin 1, c | 26585.00 GREM1       | 3517.00 | 6.08  | 1.56 |
| 50057.00 C16 | M-024576 DNA segme    | 27351.00 D15Wsu75e   | 4182.00 | 7.89  | 3.37 |
| 50057.00 C17 | M-017099 cytoskeletc  | 26586.00 CKAP2       | 2913.00 | 5.90  | 1.38 |
| 50057.00 C18 | M-014204 malonyl Co   | 27349.00 MCAT        | 1339.00 | 3.51  | 1.01 |
| 50057.00 C19 | M-017562 mitochond    | 26589.00 MRPL46      | 4034.00 | 6.02  | 1.50 |
| 50057.00 C20 | M-014203 torsin fami  | 27348.00 TOR1B       | 4185.00 | 5.57  | 1.05 |
| 50057.00 C21 | M-012484 transducin   | 26608.00 TBL2        | 5461.00 | 10.60 | 6.08 |
| 50057.00 C23 | M-016927 elongation   | 26610.00 ELP4        | 4666.00 | 10.65 | 6.13 |
| 50057.00 D02 | M-014199 zinc finger  | 30832.00 ZNF354C     | 2489.00 | 0.84  | 3.68 |
| 50057.00 D04 | M-008545 CXXC finger  | 30827.00 CXXC1       | 1811.00 | 0.17  | 4.35 |
| 50057.00 D05 | M-021389 osteopetro   | 28962.00 OSTM1       | 3251.00 | 4.21  | 0.31 |
| 50057.00 D06 | M-013559 Kv channel   | 30820.00 KCNIP1      | 3285.00 | 2.19  | 2.33 |
| 50057.00 D07 | M-007502 solute carri | 28965.00 SLC27A6     | 5071.00 | 3.67  | 0.85 |
| 50057.00 D08 | M-017333 Kv channel   | 30819.00 KCNIP2      | 3795.00 | 2.98  | 1.54 |
| 50057.00 D09 | M-020568 sorting nex  | 28966.00 SNX24       | 4578.00 | 1.16  | 3.36 |
| 50057.00 D10 | M-010573 endogenou    | 30816.00 ERVWE1      | 3986.00 | 3.69  | 0.83 |
| 50057.00 D11 | M-007372 solute carri | 28968.00 SLC6A16     | 3488.00 | 1.43  | 3.09 |
| 50057.00 D12 | M-016657 ST6 (alpha-  | 30815.00 ST6GALNAC6  | 3316.00 | 1.96  | 2.56 |
| 50057.00 D13 | M-020573 basic leucir | 28969.00 BZW2        | 3547.00 | 5.10  | 0.58 |
| 50057.00 D14 | M-020496 retina and   | 30062.00 RAX         | 4527.00 | 5.21  | 0.69 |
| 50057.00 D15 | M-016791 chromoson    | 28970.00 C11orf54    | 4058.00 | 4.63  | 0.11 |
| 50057.00 D16 | M-01356C sperm prot   | 30014.00 SPANXA1     | 2890.00 | 3.29  | 1.23 |
| 50057.00 D17 | M-014411 chromoson    | 28971.00 C11orf67    | 2833.00 | 7.45  | 2.93 |
| 50057.00 D18 | M-014111 T-cell leuke | 30012.00 TLX3        | 3689.00 | 4.28  | 0.24 |
| 50057.00 D19 | M-020577 signal pept  | 28972.00 SPCS1       | 4407.00 | 6.74  | 2.22 |
| 50057.00 D20 | M-016786 neurexophi   | 30010.00 NXPH1       | 3628.00 | 3.42  | 1.10 |
| 50057.00 D21 | M-013043 mitochond    | 28973.00 MRPS18B     | 5271.00 | 10.43 | 5.91 |
| 50057.00 D23 | M-020581 chromoson    | 28974.00 C19orf53    | 4362.00 | 5.91  | 1.39 |
| 50057.00 E02 | M-014198 transmemk    | 27346.00 TMEM97      | 2708.00 | 3.25  | 1.27 |
| 50057.00 E04 | M-008225 potassium    | 27345.00 KCNMB4      | 2419.00 | 9.30  | 4.78 |
| 50057.00 E05 | M-026243 olfactory re | 26740.00 OR1J2       | 2464.00 | 10.96 | 6.44 |
| 50057.00 E06 | M-016782 CGI-96 proi  | 27341.00 CTA-126B4.3 | 2230.00 | 0.76  | 3.76 |
| 50057.00 E07 | M-019605 nuclear fra  | 26747.00 NUFIP1      | 3678.00 | 2.77  | 1.75 |
| 50057.00 E08 | M-004668 PRP19/PSC    | 27339.00 PRPF19      | 2263.00 | 2.47  | 2.05 |
| 50057.00 E09 | M-011278 G antigen 7  | 26748.00 GAGE7B      | 3380.00 | 2.81  | 1.71 |
| 50057.00 E10 | M-020216 eukaryotic   | 27335.00 EIF3S12     | 1831.00 | 3.88  | 0.64 |
| 50057.00 E11 | M-012437 G antigen 8  | 26749.00 GAGE8       | 3784.00 | 6.18  | 1.66 |

|              |                        |                   |         |       |       |
|--------------|------------------------|-------------------|---------|-------|-------|
| 50057.00 E12 | M-013716 golgi phosph  | 27333.00 GOLPH4   | 2093.00 | 5.26  | 0.74  |
| 50057.00 E13 | M-020542 SH3 domain    | 26751.00 SH3YL1   | 4042.00 | 4.95  | 0.43  |
| 50057.00 E14 | M-013715 zinc finger   | 27332.00 ZNF638   | 4166.00 | 6.24  | 1.72  |
| 50057.00 E15 | M-003713 six transme   | 26872.00 STEAP1   | 4448.00 | 6.25  | 1.73  |
| 50057.00 E16 | M-014107 trinucleotic  | 27327.00 TNRC6A   | 3588.00 | 10.17 | 5.65  |
| 50057.00 E17 | M-025810 5-oxoprolin   | 26873.00 OPLAH    | 2279.00 | 6.01  | 1.49  |
| 50057.00 E18 | M-022555 TOX high m    | 27324.00 TOX3     | 2941.00 | 6.46  | 1.94  |
| 50057.00 E19 | M-019988 coatome r     | 26958.00 COPG2    | 3983.00 | 11.75 | 7.23  |
| 50057.00 E20 | M-009049 basic helix-  | 27319.00 BHLHB5   | 3741.00 | 6.68  | 2.16  |
| 50057.00 E21 | M-021457 HMG-box t     | 26959.00 HBP1     | 3846.00 | 6.58  | 2.06  |
| 50057.00 E23 | M-019998 cysteine an   | 26973.00 CHORDC1  | 4985.00 | 7.72  | 3.20  |
| 50057.00 F02 | M-013089 EGF-contai    | 30008.00 EFEMP2   | 2026.00 | 0.59  | 3.93  |
| 50057.00 F04 | M-020491 transportin   | 30000.00 TNPO2    | 1327.00 | 1.21  | 3.31  |
| 50057.00 F05 | M-017553 mitochond     | 28977.00 MRPL42   | 2933.00 | 5.35  | 0.83  |
| 50057.00 F06 | M-013567 LIM and cy    | 29995.00 LMCD1    | 2030.00 | 3.74  | 0.78  |
| 50057.00 F07 | M-018878 transmemk     | 28978.00 TMEM14A  | 2751.00 | 3.89  | 0.63  |
| 50057.00 F08 | M-020487 bromodom      | 29994.00 BAZ2B    | 1317.00 | 3.19  | 1.33  |
| 50057.00 F09 | M-014740 intraflagelli | 28981.00 IFT81    | 3194.00 | 9.96  | 5.44  |
| 50057.00 F10 | M-019011 paired imr    | 29992.00 PILRA    | 2871.00 | 7.00  | 2.48  |
| 50057.00 F11 | M-020594 NIN1/RPN1     | 28987.00 NOB1     | 3257.00 | 6.02  | 1.50  |
| 50057.00 F12 | M-010028 odorant bir   | 29991.00 OBP2A    | 3314.00 | 3.05  | 1.47  |
| 50057.00 F13 | M-019236 asteroid hc   | 28990.00 ASTE1    | 3341.00 | 5.42  | 0.90  |
| 50057.00 F14 | M-008879 odorant bir   | 29989.00 OBP2B    | 3500.00 | 7.11  | 2.59  |
| 50057.00 F15 | M-015390 COMM dor      | 28991.00 COMM5    | 2333.00 | 8.92  | 4.40  |
| 50057.00 F16 | M-007570 solute carri  | 29986.00 SLC39A2  | 2656.00 | 8.02  | 3.50  |
| 50057.00 F17 | M-013863 LRP16 prot    | 28992.00 LRP16    | 3277.00 | 6.16  | 1.64  |
| 50057.00 F18 | M-007571 solute carri  | 29985.00 SLC39A3  | 3719.00 | 12.48 | 7.96  |
| 50057.00 F19 | M-031072 chromoson     | 29035.00 C16orf72 | 3990.00 | 6.34  | 1.82  |
| 50057.00 F20 | M-017453 downstrea     | 29980.00 DONSON   | 3275.00 | 15.05 | 10.53 |
| 50057.00 F21 | M-017637 transmemk     | 29057.00 TMEM29   | 3599.00 | 8.59  | 4.07  |
| 50057.00 F23 | M-015123 chromoson     | 29058.00 C20orf30 | 3353.00 | 11.63 | 7.11  |
| 50057.00 G02 | M-011691 RNA bindin    | 27316.00 RBMX     | 2138.00 | 0.80  | 3.72  |
| 50057.00 G04 | M-014202 zinc finger   | 27309.00 ZNF330   | 2166.00 | 1.52  | 3.00  |
| 50057.00 G05 | M-016987 zinc finger   | 26974.00 ZNF285A  | 3922.00 | 6.25  | 1.73  |
| 50057.00 G06 | M-006406 molybdenu     | 27304.00 MOCS3    | 3464.00 | 4.73  | 0.21  |
| 50057.00 G07 | M-012479 SEC22 vesic   | 26984.00 SEC22A   | 3577.00 | 2.82  | 1.70  |
| 50057.00 G08 | M-013731 bone morp     | 27302.00 BMP10    | 1242.00 | 4.43  | 0.09  |
| 50057.00 G09 | M-013645 adaptor-rel   | 26985.00 AP3M1    | 2580.00 | 2.17  | 2.35  |
| 50057.00 G10 | M-013730 APEX nucle    | 27301.00 APEX2    | 1739.00 | 1.67  | 2.85  |
| 50057.00 G11 | M-019598 poly(A) bin   | 26986.00 PABPC1   | 2888.00 | 2.49  | 2.03  |
| 50057.00 G12 | M-020223 zinc finger   | 27300.00 ZNF544   | 3534.00 | 3.79  | 0.73  |
| 50057.00 G13 | M-006971 ring finger   | 26994.00 RNF11    | 3192.00 | 5.98  | 1.46  |
| 50057.00 G14 | M-031994 calcitonin g  | 27297.00 RCP9     | 2847.00 | 4.39  | 0.13  |
| 50057.00 G15 | M-013879 TruB pseud    | 26995.00 TRUB2    | 3417.00 | 10.86 | 6.34  |
| 50057.00 G16 | M-020226 chromoson     | 27296.00 C20orf10 | 4242.00 | 5.19  | 0.67  |

|              |                        |                    |         |      |      |
|--------------|------------------------|--------------------|---------|------|------|
| 50057.00 G17 | M-012514 fetuin B      | 26998.00 FETUB     | 2657.00 | 7.19 | 2.67 |
| 50057.00 G18 | M-020229 PDZ and LIM   | 27295.00 PDLIM3    | 1805.00 | 2.99 | 1.53 |
| 50057.00 G19 | M-025435 zuotin relat  | 27000.00 ZRF1      | 3513.00 | 4.95 | 0.43 |
| 50057.00 G20 | M-009651 dihydrodio    | 27294.00 DHDH      | 3146.00 | 2.99 | 1.53 |
| 50057.00 G21 | M-012522 T-cell leuke  | 27004.00 TCL6      | 2779.00 | 5.87 | 1.35 |
| 50057.00 G23 | M-013171 fibroblast g  | 27006.00 FGF22     | 3691.00 | 3.77 | 0.75 |
| 50057.00 H02 | M-013566 ubiquilin 2   | 29978.00 UBQLN2    | 1568.00 | 3.44 | 1.08 |
| 50057.00 H04 | M-020483 schwannon     | 29970.00 SCHIP1    | 1889.00 | 0.69 | 3.83 |
| 50057.00 H05 | M-020654 HSPC047 p     | 29060.00 HSPC047   | 2370.00 | 1.31 | 3.21 |
| 50057.00 H06 | M-025441 MyoD fami     | 29969.00 MDFIC     | 1922.00 | 0.52 | 4.00 |
| 50057.00 H07 | M-020659 HSPC049 p     | 29062.00 HSPC049   | 1156.00 | 0.52 | 4.00 |
| 50057.00 H08 | M-010398 phosphose     | 29968.00 PSAT1     | 1477.00 | 1.96 | 2.56 |
| 50057.00 H09 | M-028349 zinc finger,  | 29063.00 ZCCHC4    | 2536.00 | 2.52 | 2.00 |
| 50057.00 H10 | M-019145 striatin, cal | 29966.00 STRN3     | 2329.00 | 2.19 | 2.33 |
| 50057.00 H11 | M-017719 zinc finger   | 29066.00 ZC3H7A    | 2821.00 | 1.99 | 2.53 |
| 50057.00 H12 | M-020451 chromosom     | 29965.00 C16orf5   | 2304.00 | 0.56 | 3.96 |
| 50057.00 H13 | M-020671 zinc finger   | 29068.00 ZBTB44    | 2507.00 | 1.83 | 2.69 |
| 50057.00 H14 | M-006979 chromosom     | 29964.00 C6orf49   | 2409.00 | 2.95 | 1.57 |
| 50057.00 H15 | M-015391 coiled-coil   | 29070.00 CCDC113   | 1938.00 | 4.70 | 0.18 |
| 50057.00 H16 | M-013626 FtsJ homolo   | 29960.00 FTSJ2     | 2719.00 | 3.31 | 1.21 |
| 50057.00 H17 | M-018778 C1GALT1-sj    | 29071.00 C1GALT1C1 | 1942.00 | 4.58 | 0.06 |
| 50057.00 H18 | M-007325 solute carri  | 29957.00 SLC25A24  | 2035.00 | 3.49 | 1.03 |
| 50057.00 H19 | M-017251 mitochond     | 29074.00 MRPL18    | 2504.00 | 4.91 | 0.39 |
| 50057.00 H20 | M-010282 LAG1 homc     | 29956.00 LASS2     | 2451.00 | 5.34 | 0.82 |
| 50057.00 H21 | M-020673 HSPC072 p     | 29075.00 HSPC072   | 2253.00 | 3.33 | 1.19 |
| 50057.00 H23 | M-020684 chromosom     | 29078.00 C6orf66   | 2477.00 | 4.24 | 0.28 |
| 50057.00 I02 | M-010136 sphingomy     | 27293.00 SMPDL3B   | 2823.00 | 1.24 | 3.28 |
| 50057.00 I04 | M-009476 DIM1 dime     | 27292.00 DIMT1L    | 2226.00 | 2.83 | 1.69 |
| 50057.00 I05 | M-019262 nephronop     | 27031.00 NPHP3     | 1972.00 | 1.88 | 2.64 |
| 50057.00 I06 | M-018936 chromosom     | 27291.00 C10orf28  | 2984.00 | 4.06 | 0.47 |
| 50057.00 I07 | M-010193 NADPH oxi     | 27035.00 NOX1      | 3592.00 | 4.26 | 0.26 |
| 50057.00 I08 | M-020235 serine pept   | 27290.00 SPINK4    | 1934.00 | 2.74 | 1.78 |
| 50057.00 I09 | M-020546 sialic acid b | 27036.00 SIGLEC7   | 2483.00 | 7.17 | 2.65 |
| 50057.00 I10 | M-012532 testes-spec   | 27288.00 HNRNPG-T  | 2259.00 | 4.43 | 0.09 |
| 50057.00 I11 | M-016762 Hpal1 tiny f  | 27037.00 HTF9C     | 3075.00 | 1.98 | 2.54 |
| 50057.00 I12 | M-009614 sushi-repea   | 27286.00 SRPX2     | 2868.00 | 3.49 | 1.03 |
| 50057.00 I13 | M-018287 chromosom     | 27042.00 C1orf107  | 1148.00 | 1.92 | 2.60 |
| 50057.00 I14 | M-012530 tektin 2 (te  | 27285.00 TEK2      | 1663.00 | 3.01 | 1.51 |
| 50057.00 I15 | M-010657 staphyloco    | 27044.00 SND1      | 1834.00 | 2.29 | 2.23 |
| 50057.00 I16 | M-008259 tubulointer   | 27283.00 TINAG     | 2661.00 | 2.67 | 1.85 |
| 50057.00 I17 | M-008816 DNA segme     | 27065.00 D4S234E   | 1763.00 | 1.13 | 3.39 |
| 50057.00 I18 | M-020240 LSM3 homc     | 27258.00 LSM3      | 2708.00 | 5.32 | 0.80 |
| 50057.00 I19 | M-006873 staufen, RN   | 27067.00 STAU2     | 2034.00 | 6.00 | 1.48 |
| 50057.00 I20 | M-005124 LSM1 homc     | 27257.00 LSM1      | 2092.00 | 3.92 | 0.60 |
| 50057.00 I21 | M-020534 growth hor    | 27069.00 GHITM     | 1072.00 | 2.24 | 2.28 |

|              |                       |                     |         |       |       |
|--------------|-----------------------|---------------------|---------|-------|-------|
| 50057.00 I23 | M-020531 dual adapt   | 27071.00 DAPP1      | 1392.00 | 3.30  | 1.22  |
| 50057.00 J02 | M-019142 protein-O-r  | 29954.00 POMT2      | 1970.00 | 6.09  | 1.57  |
| 50057.00 J04 | M-005854 dipeptidyl-l | 29952.00 DPP7       | 2545.00 | 4.79  | 0.27  |
| 50057.00 J05 | M-020693 coiled-coil  | 29080.00 CCDC59     | 1668.00 | 7.79  | 3.27  |
| 50057.00 J06 | M-020442 PDZ domai    | 29951.00 PDZRN4     | 2275.00 | 5.01  | 0.49  |
| 50057.00 J07 | M-020695 methyltran   | 29081.00 METTL5     | 2193.00 | 5.24  | 0.72  |
| 50057.00 J08 | M-010197 oxidative st | 29948.00 OSGIN1     | 1790.00 | 9.94  | 5.42  |
| 50057.00 J09 | M-020698 chromatin    | 29082.00 CHMP4A     | 2090.00 | 7.51  | 2.99  |
| 50057.00 J10 | M-013637 DNA (cytos   | 29947.00 DNMT3L     | 2479.00 | 8.87  | 4.35  |
| 50057.00 J11 | M-020699 GTP-bindin   | 29083.00 GTPBP8     | 2033.00 | 8.51  | 3.99  |
| 50057.00 J12 | M-013636 SERTA dom    | 29946.00 SERTAD3    | 1393.00 | 12.85 | 8.33  |
| 50057.00 J13 | M-020702 chromoson    | 29086.00 C19orf62   | 1623.00 | 3.82  | 0.70  |
| 50057.00 J14 | M-020437 paraneopla   | 29944.00 PNMA3      | 1374.00 | 6.11  | 1.59  |
| 50057.00 J15 | M-020704 thymocyte    | 29087.00 THYN1      | 1160.00 | 6.03  | 1.51  |
| 50057.00 J16 | M-008369 peptidyl ar  | 29943.00 PADI1      | 2114.00 | 8.80  | 4.28  |
| 50057.00 J17 | M-013052 mitochond    | 29088.00 MRPL15     | 1172.00 | 8.70  | 4.18  |
| 50057.00 J18 | M-013641 purine-rich  | 29942.00 PURG       | 3611.00 | 6.40  | 1.88  |
| 50057.00 J19 | M-016773 syntaxin bi  | 29091.00 STXBP6     | 2457.00 | 8.14  | 3.62  |
| 50057.00 J20 | M-013644 dermatan s   | 29940.00 DSE        | 2733.00 | 7.28  | 2.76  |
| 50057.00 J21 | M-017259 mitochond    | 29093.00 MRPL22     | 1784.00 | 4.99  | 0.47  |
| 50057.00 J23 | M-020714 galectin-rel | 29094.00 HSPC159    | 1451.00 | 7.72  | 3.20  |
| 50057.00 K02 | M-012844 cold shock   | 27254.00 CSDC2      | 1698.00 | 6.95  | 2.43  |
| 50057.00 K04 | M-013862 chromoson    | 27249.00 C2orf25    | 2065.00 | 14.19 | 9.67  |
| 50057.00 K05 | M-006972 vacuolar pr  | 27072.00 VPS41      | 2588.00 | 7.42  | 2.90  |
| 50057.00 K06 | M-010658 chromoson    | 27248.00 C2orf30    | 2959.00 | 10.71 | 6.19  |
| 50057.00 K07 | M-004716 lysosomal-i  | 27074.00 LAMP3      | 2326.00 | 8.00  | 3.48  |
| 50057.00 K08 | M-020552 NFU1 iron-   | 27247.00 NFU1       | 2747.00 | 9.79  | 5.27  |
| 50057.00 K09 | M-012516 tetraspanir  | 27075.00 TSPAN13    | 2743.00 | 11.67 | 7.15  |
| 50057.00 K10 | M-006974 zinc finger  | 27246.00 ZNF364     | 1687.00 | 10.67 | 6.15  |
| 50057.00 K11 | M-010069 LY6/PLAUR    | 27076.00 LYPD3      | 2077.00 | 7.90  | 3.38  |
| 50057.00 K12 | M-027522 AT hook, D   | 27245.00 AHDC1      | 1633.00 | 9.25  | 4.73  |
| 50057.00 K13 | M-013039 B9 protein   | 27077.00 EPPB9      | 1203.00 | 2.99  | 1.53  |
| 50057.00 K14 | M-020247 chromatin    | 27243.00 CHMP2A     | 534.00  | 7.68  | 3.16  |
| 50057.00 K15 | M-015920 RNA pseud    | 27079.00 RPUSD2     | 3967.00 | 10.34 | 5.82  |
| 50057.00 K16 | M-010940 Bardet-Bier  | 27241.00 BBS9       | 2734.00 | 5.49  | 0.97  |
| 50057.00 K17 | M-012896 beta-1,3-gl  | 27087.00 B3GAT1     | 2576.00 | 2.80  | 1.73  |
| 50057.00 K18 | M-020250 signaling th | 27240.00 SIT1       | 2796.00 | 8.94  | 4.42  |
| 50057.00 K19 | M-012517 ubiquinol-c  | 27089.00 UQCRQ      | 1267.00 | 2.60  | 1.92  |
| 50057.00 K20 | M-015129 G patch do   | 27238.00 GPKOW      | 2136.00 | 3.14  | 1.38  |
| 50057.00 K21 | M-017327 ST6 (alpha-  | 27090.00 ST6GALNAC4 | 2461.00 | 32.59 | 28.07 |
| 50057.00 K23 | M-012518 calcium cha  | 27091.00 CACNG5     | 2443.00 | 3.64  | 0.88  |
| 50057.00 L02 | M-016079 neuron der   | 29937.00 NENF       | 2711.00 | 2.58  | 1.94  |
| 50057.00 L04 | M-013648 sorting nex  | 29934.00 SNX12      | 1375.00 | 1.45  | 3.07  |
| 50057.00 L05 | M-017035 ORM1-like    | 29095.00 ORMDL2     | 1731.00 | 1.16  | 3.36  |
| 50057.00 L06 | M-020430 loss of hete | 29931.00 LOH3CR2A   | 2439.00 | 5.62  | 1.10  |

|                     |                             |                        |                |              |              |
|---------------------|-----------------------------|------------------------|----------------|--------------|--------------|
| 50057.00 L07        | M-020717 cornichon l        | 29097.00 CNIH4         | 2816.00        | 3.62         | 0.90         |
| 50057.00 L08        | M-006473 translocase        | 29928.00 TIMM22        | 2094.00        | 1.38         | 3.14         |
| 50057.00 L09        | M-020497 RAN guanir         | 29098.00 RANGNRF       | 2363.00        | 3.30         | 1.22         |
| 50057.00 L10        | M-021503 Sec61 alph         | 29927.00 SEC61A1       | 1296.00        | 2.16         | 2.36         |
| 50057.00 L11        | M-020724 COMM dor           | 29099.00 COMMD9        | 696.00         | 3.88         | 0.64         |
| 50057.00 L12        | M-013667 GDP-mann           | 29926.00 GMPPA         | 1400.00        | 3.29         | 1.23         |
| 50057.00 L13        | M-020727 HSPC171 p          | 29100.00 HSPC171       | 3092.00        | 4.04         | 0.48         |
| 50057.00 L14        | M-008947 GDP-mann           | 29925.00 GMPPB         | 1812.00        | 1.88         | 2.64         |
| 50057.00 L15        | M-020740 SSU72 RNA          | 29101.00 SSU72         | 1159.00        | 1.55         | 2.97         |
| 50057.00 L16        | M-004724 epsin 1            | 29924.00 EPN1          | 3286.00        | 5.57         | 1.05         |
| 50057.00 L17        | M-016996 ribonuclea         | 29102.00 RNASEN        | 2815.00        | 3.23         | 1.29         |
| 50057.00 L18        | M-013673 sorting nex        | 29916.00 SNX11         | 4262.00        | 4.34         | 0.18         |
| 50057.00 L19        | M-020286 DnaJ (Hsp4         | 29103.00 DNAJC15       | 3139.00        | 5.29         | 0.77         |
| 50057.00 L20        | M-020412 UbiA preny         | 29914.00 UBIAD1        | 3948.00        | 5.45         | 0.93         |
| 50057.00 L21        | M-008565 N-6 adenin         | 29104.00 N6AMT1        | 3056.00        | 1.90         | 2.62         |
| 50057.00 L23        | M-020289 chromoson          | 29105.00 C16orf80      | 3011.00        | 1.03         | 3.49         |
| 50057.00 M02        | M-020256 ADP-ribosy         | 27236.00 ARFIP1        | 1214.00        | 9.80         | 5.28         |
| <b>50057.00 M04</b> | <b>M-018361 coenzyme I</b>  | <b>27235.00 COQ2</b>   | <b>2454.00</b> | <b>12.43</b> | <b>7.91</b>  |
| 50057.00 M05        | M-012519 calcium cha        | 27092.00 CACNG4        | 1565.00        | 3.19         | 1.33         |
| 50057.00 M06        | M-010391 sulfotransf        | 27233.00 SULT1C4       | 2306.00        | 13.14        | <b>8.62</b>  |
| 50057.00 M07        | M-00888C potassium          | 27094.00 KCNM3         | 1987.00        | 7.40         | 2.88         |
| 50057.00 M08        | M-006747 integrin be        | 27231.00 ITGB1BP3      | 1695.00        | 6.31         | 1.79         |
| 50057.00 M09        | M-017649 trafficking j      | 27095.00 TRAPPC3       | 1533.00        | 11.81        | <b>7.29</b>  |
| 50057.00 M10        | M-015404 stress-asso        | 27230.00 SERP1         | 1560.00        | 5.00         | 0.48         |
| 50057.00 M11        | M-017042 clusterin-li       | 27098.00 CLUL1         | 1852.00        | 6.97         | 2.45         |
| 50057.00 M12        | M-013092 vacuolar pr        | 27183.00 VPS4A         | 1621.00        | 7.09         | 2.57         |
| 50057.00 M13        | M-012841 nasophary          | 27099.00 NAG8          | 2733.00        | 11.12        | <b>6.60</b>  |
| 50057.00 M14        | M-012843 sialic acid b      | 27181.00 SIGLEC8       | 791.00         | 18.46        | <b>13.94</b> |
| 50057.00 M15        | M-012521 calcyclin bi       | 27101.00 CACYBP        | 2152.00        | 8.36         | 3.84         |
| 50057.00 M16        | M-012842 sialic acid b      | 27180.00 SIGLEC9       | 2794.00        | 14.85        | <b>10.33</b> |
| 50057.00 M17        | M-013874 arrestin do        | 27106.00 ARRDC2        | 2241.00        | 4.55         | 0.03         |
| 50057.00 M18        | M-007564 solute carri       | 27173.00 SLC39A1       | 1840.00        | 6.47         | 1.95         |
| <b>50057.00 M19</b> | <b>M-020524 zinc finger</b> | <b>27107.00 ZBTB11</b> | <b>2261.00</b> | <b>11.85</b> | <b>7.33</b>  |
| 50057.00 M20        | M-01765C PRELI dom          | 27166.00 PRELID1       | 3433.00        | 12.21        | <b>7.69</b>  |
| <b>50057.00 M21</b> | <b>M-020544 ATP syntha</b>  | <b>27109.00 ATP5S</b>  | <b>3384.00</b> | <b>19.36</b> | <b>14.84</b> |
| 50057.00 M23        | M-015232 syndecan b         | 27111.00 SDCBP2        | 1532.00        | 6.07         | 1.55         |
| 50057.00 N02        | M-020408 hook homc          | 29911.00 HOOK2         | 2503.00        | 3.04         | 1.48         |
| 50057.00 N04        | M-017488 sorting nex        | 29907.00 SNX15         | 3006.00        | 3.63         | 0.89         |
| 50057.00 N05        | M-020746 chromoson          | 29113.00 C6orf15       | 2424.00        | 2.85         | 1.67         |
| 50057.00 N06        | M-013672 ST8 alpha-l        | 29906.00 ST8SIA5       | 3245.00        | 4.56         | 0.04         |
| 50057.00 N07        | M-020295 transgelin         | 29114.00 TAGLN3        | 2854.00        | 4.84         | 0.32         |
| 50057.00 N08        | M-020402 coiled-coil        | 29903.00 CCDC106       | 2985.00        | 3.72         | 0.80         |
| 50057.00 N09        | M-006976 myosin reg         | 29116.00 MYLIP         | 2072.00        | 4.58         | 0.06         |
| 50057.00 N10        | M-020401 chromoson          | 29902.00 C12orf24      | 1732.00        | 1.21         | 3.31         |
| 50057.00 N11        | M-013708 DEAD (Asp-         | 29118.00 DDX25         | 4315.00        | 9.18         | 4.66         |

|              |                        |                               |         |      |      |
|--------------|------------------------|-------------------------------|---------|------|------|
| 50057.00 N12 | M-020398 SAC3 doma     | 29901.00 SAC3D1               | 2389.00 | 1.21 | 3.31 |
| 50057.00 N13 | M-009055 testes-spec   | 29122.00 TSP50                | 2991.00 | 7.29 | 2.77 |
| 50057.00 N14 | M-019480 transforme    | 29896.00 TRA2A                | 2423.00 | 5.16 | 0.64 |
| 50057.00 N15 | M-027299 ankyrin rep   | 29123.00 ANKRD11              | 2959.00 | 3.55 | 0.97 |
| 50057.00 N16 | M-017964 fast skeleta  | 29895.00 MYLPF                | 1629.00 | 7.67 | 3.15 |
| 50057.00 N17 | M-017203 lectin, gala  | 29124.00 LGALS13              | 3061.00 | 8.33 | 3.81 |
| 50057.00 N18 | M-020395 cleavage ar   | 29894.00 CPSF1                | 2650.00 | 5.02 | 0.50 |
| 50057.00 N19 | M-015836 CD274 mol     | 29126.00 CD274                | 3079.00 | 6.37 | 1.85 |
| 50057.00 N20 | M-018726 PSMC3 inte    | 29893.00 PSMC3IP              | 4216.00 | 8.70 | 4.18 |
| 50057.00 N21 | M-008650 Rac GTPase    | 29127.00 RACGAP1              | 2355.00 | 8.66 | 4.14 |
| 50057.00 N23 | M-020356 tropomodu     | 29765.00 TMOD4                | 981.00  | 5.50 | 0.98 |
| 50057.00 O02 | M-012500 glutaminas    | 27165.00 GLS2                 | 1039.00 | 3.27 | 1.25 |
| 50057.00 O04 | M-008297 N-acylsphir   | 27163.00 AS AHL               | 1527.00 | 3.41 | 1.11 |
| 50057.00 O05 | M-020550 transmemt     | 27112.00 TMEM28               | 1277.00 | 2.90 | 1.62 |
| 50057.00 O06 | M-004639 eukaryotic    | 27161.00 EIF2C2               | 1713.00 | 3.79 | 0.73 |
| 50057.00 O07 | M-020522 dickkopf-lik  | 27120.00 DKKL1                | 1616.00 | 1.92 | 2.60 |
| 50057.00 O08 | M-010196 NADPH de      | 27158.00 NDOR1                | 1944.00 | 4.48 | 0.04 |
| 50057.00 O09 | M-020520 dickkopf hc   | 27121.00 DKK4                 | 1094.00 | 5.30 | 0.78 |
| 50057.00 O10 | M-025088 bromodom      | 27154.00 BRPF3                | 2492.00 | 6.66 | 2.14 |
| 50057.00 O11 | M-018352 dickkopf hc   | 27122.00 DKK3                 | 1567.00 | 2.74 | 1.78 |
| 50057.00 O12 | M-013868 zinc finger   | 27153.00 ZNF777               | 1168.00 | 3.94 | 0.58 |
| 50057.00 O13 | M-020278 dickkopf hc   | 27123.00 DKK2                 | 1264.00 | 1.42 | 3.10 |
| 50057.00 O14 | M-031873 inturnd pl    | 27152.00 INTU                 | 1679.00 | 1.91 | 2.61 |
| 50057.00 O15 | M-015461 structural r  | 27127.00 88888888888888970.00 | 1601.00 | 1.87 | 2.65 |
| 50057.00 O16 | M-013870 C3 and PZP    | 27151.00 CPAMD8               | 2014.00 | 1.59 | 2.93 |
| 50057.00 O17 | M-012523 inversin      | 27130.00 INVS                 | 2532.00 | 2.33 | 2.19 |
| 50057.00 O18 | M-025359 DENN/MAI      | 27147.00 DENND2A              | 3855.00 | 2.15 | 2.37 |
| 50057.00 O19 | M-009660 tight juncti  | 27134.00 TJP3                 | 2661.00 | 0.79 | 3.73 |
| 50057.00 O20 | M-024219 KIAA1276 r    | 27146.00 KIAA1276             | 1531.00 | 1.11 | 3.41 |
| 50057.00 O21 | M-012526 MORC fam      | 27136.00 MORC1                | 1588.00 | 2.33 | 2.19 |
| 50057.00 O23 | M-013875 filamin A in  | 27145.00 FILIP1               | 1362.00 | 0.73 | 3.79 |
| 50057.00 P02 | M-018823 RNA bindin    | 29890.00 RBM15B               | 1427.00 | 5.40 | 0.88 |
| 50057.00 P04 | M-020392 guanine nu    | 29889.00 GNL2                 | 1650.00 | 4.24 | 0.28 |
| 50057.00 P05 | M-017656 tropomodu     | 29766.00 TMOD3                | 2219.00 | 3.92 | 0.60 |
| 50057.00 P06 | M-020389 striatin, cal | 29888.00 STRN4                | 1834.00 | 2.29 | 2.23 |
| 50057.00 P07 | M-020360 tropomodu     | 29767.00 TMOD2                | 1147.00 | 2.62 | 1.90 |
| 50057.00 P08 | M-017559 sorting nex   | 29887.00 SNX10                | 1658.00 | 6.33 | 1.81 |
| 50057.00 P09 | M-031949 POM121-lil    | 29774.00 DKFZP434P211         | 2300.00 | 3.83 | 0.69 |
| 50057.00 P10 | M-014196 sorting nex   | 29886.00 SNX8                 | 2111.00 | 1.42 | 3.10 |
| 50057.00 P11 | M-016078 parvin, bet.  | 29780.00 PARVB                | 2011.00 | 3.43 | 1.09 |
| 50057.00 P12 | M-008048 NPC1 (Nier    | 29881.00 NPC1L1               | 2415.00 | 1.61 | 2.91 |
| 50057.00 P13 | M-008783 cytochrom     | 29785.00 CYP2S1               | 2083.00 | 1.44 | 3.08 |
| 50057.00 P14 | M-020377 transcriptic  | 29842.00 TFCP2L1              | 1351.00 | 0.74 | 3.78 |
| 50057.00 P15 | M-015680 GTP-bindin    | 29789.00 GTPBP9               | 1765.00 | 1.42 | 3.10 |
| 50057.00 P16 | M-020375 grainyhead    | 29841.00 GRHL1                | 2574.00 | 1.28 | 3.24 |



|              |                                  |                        |         |       |      |
|--------------|----------------------------------|------------------------|---------|-------|------|
| 50057.00 P17 | M-010899 ubiquinol-c             | 29796.00 UCRC          | 3514.00 | 1.05  | 3.47 |
| 50057.00 P18 | M-006978 replication             | 29803.00 REPIN1        | 4102.00 | 1.46  | 3.06 |
| 50057.00 P19 | M-020366 chromoson               | 29798.00 C2orf27       | 2096.00 | 0.38  | 4.14 |
| 50057.00 P20 | M-014194 zinc finger,            | 29801.00 ZDHHC8        | 2572.00 | 1.13  | 3.39 |
| 50057.00 P21 | M-020369 yippee-like             | 29799.00 YPEL1         | 1282.00 | 1.72  | 2.80 |
| 50057.00 P23 | M-014193 zinc finger,            | 29800.00 ZDHHC1        | 788.00  | 1.27  | 3.25 |
|              |                                  |                        | 2503.50 | 4.52  | 2.07 |
|              |                                  | MAD3                   |         |       | 6.20 |
|              |                                  | MADc                   |         |       | 3.06 |
| 50057.00 C22 |                                  |                        | 4429.00 | 39.78 |      |
| 50057.00 D22 |                                  |                        | 4333.00 | 41.36 |      |
| 50057.00 E22 |                                  |                        | 3609.00 | 43.61 |      |
| 50057.00 F22 |                                  |                        | 4027.00 | 48.62 |      |
|              |                                  | mn                     | 4099.50 | 43.34 |      |
|              |                                  | sd                     | 369.21  | 3.85  |      |
| 50057.00 G22 |                                  |                        | 1067.00 | 1.31  |      |
| 50057.00 H22 |                                  |                        | 501.00  | 1.40  |      |
| 50057.00 I22 |                                  |                        | 185.00  | 2.70  |      |
| 50057.00 J22 |                                  |                        | 388.00  | 1.55  |      |
|              |                                  | mn                     | 358.00  | 1.88  |      |
|              |                                  | sd                     | 160.12  | 0.71  |      |
|              |                                  | 3psSD                  |         | 11.56 |      |
|              |                                  | 3ngSD                  |         | 2.14  |      |
|              |                                  | SumSD                  |         | 13.71 |      |
|              |                                  | DiffMn                 |         | 41.46 |      |
|              |                                  | SmovrDiff              |         | 0.33  |      |
|              |                                  | 1minus                 |         | 0.67  |      |
| 50057.00 G03 | M-00329C polo-like ki            | 5347.00 PLK1 SMARTpool | 261.00  | 6.51  |      |
| 50057.00 H03 | M-00329C polo-like ki            | 5347.00 PLK1 SMARTpool | 143.00  | 0.70  |      |
| 50057.00 I03 | D-001206 siControl non-targeting |                        | 2443.00 | 2.09  |      |
| 50057.00 J03 | D-001206 siControl non-targeting |                        | 2974.00 | 10.22 |      |
| 50057.00 K03 | D-001600 siGLO RISC-free siRNA   |                        | 3599.00 | 9.98  |      |
| 50057.00 L03 | D-001600 siGLO RISC-free siRNA   |                        | 2854.00 | 5.64  |      |

| rZ    | Cell Coun | % inf | Abs Dev | rZ    | Cell Count | % inf | Abs Dev | rZ     |
|-------|-----------|-------|---------|-------|------------|-------|---------|--------|
| 1.10  | 1954.00   | 6.35  | 3.84    | 2.05  | 2259.00    | 1.02  | 1.79    | -0.75  |
| 0.26  | 886.00    | 0.79  | 1.72    | -0.92 | 1732.00    | 0.46  | 2.35    | -0.98  |
| 0.61  | 891.00    | 3.14  | 0.63    | 0.34  | 1764.00    | 0.57  | 2.24    | -0.94  |
| 1.06  | 1181.00   | 5.76  | 3.25    | 1.74  | 3064.00    | 1.53  | 1.28    | -0.53  |
| 0.77  | 1457.00   | 5.01  | 2.50    | 1.34  | 3547.00    | 2.48  | 0.33    | -0.14  |
| -0.16 | 1819.00   | 4.23  | 1.72    | 0.92  | 1487.00    | 0.61  | 2.20    | -0.92  |
| 1.60  | 1614.00   | 9.36  | 6.85    | 3.66  | 1703.00    | 0.53  | 2.28    | -0.96  |
| 0.10  | 889.00    | 2.47  | 0.04    | -0.02 | 2626.00    | 1.14  | 1.67    | -0.70  |
| -0.43 | 846.00    | 1.65  | 0.86    | -0.46 | 1773.00    | 1.30  | 1.51    | -0.63  |
| 0.22  | 1822.00   | 2.91  | 0.40    | 0.21  | 2838.00    | 0.74  | 2.07    | -0.87  |
| -0.72 | 1332.00   | 2.55  | 0.04    | 0.02  | 2781.00    | 0.93  | 1.88    | -0.78  |
| -0.56 | 948.00    | 4.01  | 1.50    | 0.80  | 1049.00    | 0.57  | 2.24    | -0.94  |
| -0.66 | 1249.00   | 1.44  | 1.07    | -0.57 | 1176.00    | 0.60  | 2.21    | -0.93  |
| -0.68 | 2257.00   | 4.34  | 1.83    | 0.98  | 2146.00    | 1.35  | 1.46    | -0.61  |
| -0.40 | 878.00    | 2.16  | 0.35    | -0.19 | 1759.00    | 0.91  | 1.90    | -0.80  |
| 2.22  | 1132.00   | 10.25 | 7.74    | 4.14  | 2076.00    | 3.95  | 1.14    | 0.48 y |
| -0.55 | 929.00    | 5.81  | 3.30    | 1.77  | 2729.00    | 1.54  | 1.27    | -0.53  |
| -0.89 | 1319.00   | 1.74  | 0.77    | -0.41 | 3005.00    | 0.57  | 2.24    | -0.94  |
| -0.69 | 1048.00   | 0.19  | 2.32    | -1.24 | 1752.00    | 2.00  | 0.81    | -0.34  |
| -0.98 | 1089.00   | 1.93  | 0.58    | -0.31 | 2003.00    | 0.60  | 2.21    | -0.93  |
| 1.03  | 2791.00   | 8.06  | 5.55    | 2.97  | 3084.00    | 1.46  | 1.35    | -0.57  |
| -0.01 | 1892.00   | 7.14  | 4.63    | 2.47  | 2929.00    | 0.61  | 2.20    | -0.92  |
| 1.27  | 2282.00   | 4.82  | 2.31    | 1.24  | 2963.00    | 0.88  | 1.93    | -0.81  |
| 4.87  | 3310.00   | 11.12 | 8.61    | 4.61  | 4361.00    | 3.42  | 0.61    | 0.25 y |
| -0.90 | 2407.00   | 2.49  | 0.02    | -0.01 | 2557.00    | 0.90  | 1.91    | -0.80  |
| 0.44  | 2398.00   | 5.09  | 2.58    | 1.38  | 2626.00    | 0.61  | 2.20    | -0.92  |
| 0.10  | 2987.00   | 3.11  | 0.60    | 0.32  | 3114.00    | 0.90  | 1.91    | -0.80  |
| 1.14  | 2319.00   | 2.50  | 0.01    | -0.01 | 2688.00    | 1.82  | 0.99    | -0.41  |
| -0.37 | 1825.00   | 1.86  | 0.65    | -0.35 | 3225.00    | 2.51  | 0.30    | -0.12  |
| 1.29  | 2957.00   | 5.41  | 2.90    | 1.55  | 3566.00    | 5.33  | 2.52    | 1.06   |
| -0.33 | 2883.00   | 1.66  | 0.85    | -0.45 | 3862.00    | 1.32  | 1.49    | -0.62  |
| -1.33 | 1613.00   | 4.40  | 1.89    | 1.01  | 2001.00    | 1.00  | 1.81    | -0.76  |
| -0.93 | 1181.00   | 1.27  | 1.24    | -0.66 | 950.00     | 2.11  | 0.70    | -0.29  |
| 0.44  | 1483.00   | 1.75  | 0.76    | -0.41 | 2437.00    | 1.19  | 1.62    | -0.68  |
| -0.54 | 1410.00   | 0.64  | 1.87    | -1.00 | 3367.00    | 2.38  | 0.43    | -0.18  |
| -0.87 | 2258.00   | 1.06  | 1.45    | -0.77 | 2811.00    | 1.28  | 1.53    | -0.64  |
| -0.30 | 3873.00   | 1.94  | 0.57    | -0.31 | 4822.00    | 1.29  | 1.52    | -0.64  |
| 1.31  | 3691.00   | 5.99  | 3.48    | 1.86  | 4505.00    | 13.56 | 10.75   | 4.51   |
| -1.26 | 3571.00   | 0.36  | 2.15    | -1.15 | 4081.00    | 2.92  | 0.11    | 0.05   |
| -0.63 | 2940.00   | 1.70  | 0.81    | -0.43 | 4019.00    | 4.21  | 1.40    | 0.59   |
| -0.04 | 2448.00   | 5.11  | 2.60    | 1.39  | 3061.00    | 1.21  | 1.60    | -0.67  |
| 0.18  | 1317.00   | 3.57  | 1.06    | 0.57  | 1911.00    | 0.37  | 2.44    | -1.02  |
| 2.02  | 3292.00   | 20.26 | 17.75   | 9.50  | 4170.00    | 3.77  | 0.96    | 0.40 y |
| 1.48  | 3084.00   | 12.32 | 9.81    | 5.25  | 3906.00    | 1.61  | 1.20    | -0.50  |

|       |         |       |       |       |         |      |      |        |
|-------|---------|-------|-------|-------|---------|------|------|--------|
| 1.10  | 2330.00 | 6.31  | 3.80  | 2.03  | 3371.00 | 0.47 | 2.34 | -0.98  |
| 0.93  | 3035.00 | 6.00  | 3.49  | 1.87  | 2604.00 | 0.31 | 2.50 | -1.05  |
| 0.58  | 1999.00 | 5.60  | 3.09  | 1.65  | 3947.00 | 1.32 | 1.49 | -0.62  |
| 0.57  | 2504.00 | 7.79  | 5.28  | 2.82  | 2815.00 | 0.85 | 1.96 | -0.82  |
| 0.88  | 1421.00 | 5.07  | 2.56  | 1.37  | 2727.00 | 1.39 | 1.42 | -0.59  |
| 0.78  | 3527.00 | 7.32  | 4.81  | 2.57  | 3424.00 | 1.52 | 1.29 | -0.54  |
| 0.13  | 1311.00 | 0.99  | 1.52  | -0.81 | 1069.00 | 0.37 | 2.44 | -1.02  |
| 0.19  | 3299.00 | 5.33  | 2.82  | 1.51  | 1970.00 | 0.46 | 2.35 | -0.99  |
| 0.51  | 1749.00 | 2.23  | 0.28  | -0.15 | 2232.00 | 1.93 | 0.88 | -0.37  |
| 1.10  | 1979.00 | 2.22  | 0.29  | -0.15 | 2429.00 | 1.19 | 1.62 | -0.68  |
| 0.45  | 1500.00 | 2.53  | 0.02  | 0.01  | 2279.00 | 1.27 | 1.54 | -0.64  |
| -0.33 | 1709.00 | 2.57  | 0.06  | 0.03  | 2318.00 | 0.65 | 2.16 | -0.91  |
| 0.49  | 2609.00 | 1.69  | 0.82  | -0.44 | 3674.00 | 1.52 | 1.29 | -0.54  |
| 0.34  | 3895.00 | 4.18  | 1.67  | 0.90  | 3296.00 | 1.15 | 1.66 | -0.69  |
| 1.99  | 3939.00 | 3.25  | 0.74  | 0.40  | 4774.00 | 1.21 | 1.60 | -0.67  |
| 2.00  | 2900.00 | 4.83  | 2.32  | 1.24  | 2183.00 | 1.88 | 0.93 | -0.39  |
| -1.20 | 2159.00 | 3.71  | 1.20  | 0.64  | 2125.00 | 0.28 | 2.53 | -1.06  |
| -1.42 | 1938.00 | 5.31  | 2.80  | 1.50  | 2087.00 | 1.01 | 1.80 | -0.76  |
| -0.10 | 2549.00 | 15.54 | 13.03 | 6.97  | 2579.00 | 3.41 | 0.60 | 0.25   |
| -0.76 | 2417.00 | 11.96 | 9.45  | 5.05  | 2575.00 | 0.85 | 1.96 | -0.82  |
| -0.28 | 3640.00 | 7.83  | 5.32  | 2.85  | 3130.00 | 2.36 | 0.45 | -0.19  |
| -0.50 | 1968.00 | 1.93  | 0.58  | -0.31 | 2962.00 | 1.82 | 0.99 | -0.41  |
| -1.10 | 2942.00 | 5.64  | 3.13  | 1.68  | 4041.00 | 2.05 | 0.76 | -0.32  |
| -0.27 | 3018.00 | 6.63  | 4.12  | 2.20  | 4547.00 | 1.89 | 0.92 | -0.38  |
| -1.01 | 3064.00 | 3.39  | 0.88  | 0.47  | 3388.00 | 1.51 | 1.30 | -0.55  |
| -0.84 | 2572.00 | 3.11  | 0.60  | 0.32  | 3938.00 | 3.38 | 0.57 | 0.24   |
| 0.19  | 2861.00 | 4.37  | 1.86  | 0.99  | 2559.00 | 0.66 | 2.15 | -0.90  |
| 0.23  | 2651.00 | 2.72  | 0.21  | 0.11  | 3607.00 | 2.25 | 0.56 | -0.24  |
| 0.04  | 2545.00 | 0.98  | 1.53  | -0.82 | 3235.00 | 2.57 | 0.24 | -0.10  |
| -0.40 | 1354.00 | 0.81  | 1.70  | -0.91 | 2412.00 | 2.11 | 0.70 | -0.29  |
| 0.96  | 1433.00 | 1.26  | 1.25  | -0.67 | 2644.00 | 3.03 | 0.22 | 0.09   |
| -0.08 | 1477.00 | 1.08  | 1.43  | -0.76 | 3989.00 | 3.86 | 1.05 | 0.44   |
| 0.73  | 3168.00 | 3.38  | 0.87  | 0.46  | 4311.00 | 5.01 | 2.20 | 0.92   |
| -0.36 | 2080.00 | 1.30  | 1.21  | -0.65 | 3686.00 | 5.43 | 2.62 | 1.10   |
| 1.93  | 2755.00 | 3.70  | 1.19  | 0.64  | 3995.00 | 3.28 | 0.47 | 0.20   |
| 0.46  | 2540.00 | 0.16  | 2.35  | -1.26 | 3927.00 | 3.72 | 0.91 | 0.38   |
| -0.42 | 4445.00 | 6.86  | 4.35  | 2.33  | 3070.00 | 4.40 | 1.59 | 0.67   |
| 1.56  | 2609.00 | 6.78  | 4.27  | 2.29  | 1589.00 | 8.37 | 5.56 | 2.33 y |
| 2.10  | 2259.00 | 10.27 | 7.76  | 4.15  | 2468.00 | 8.79 | 5.98 | 2.51 y |
| -1.23 | 1774.00 | 0.62  | 1.89  | -1.01 | 1712.00 | 0.88 | 1.93 | -0.81  |
| -0.57 | 2576.00 | 0.27  | 2.24  | -1.20 | 2639.00 | 0.64 | 2.17 | -0.91  |
| -0.67 | 1732.00 | 1.67  | 0.84  | -0.45 | 2080.00 | 1.15 | 1.66 | -0.69  |
| -0.56 | 3304.00 | 3.75  | 1.24  | 0.66  | 3595.00 | 4.06 | 1.25 | 0.52   |
| -0.21 | 1962.00 | 1.12  | 1.39  | -0.74 | 1415.00 | 1.98 | 0.83 | -0.35  |
| 0.54  | 2035.00 | 2.26  | 0.25  | -0.13 | 5337.00 | 8.38 | 5.57 | 2.33   |

|       |         |       |       |       |         |       |      |        |
|-------|---------|-------|-------|-------|---------|-------|------|--------|
| 0.24  | 2803.00 | 1.57  | 0.94  | -0.50 | 2101.00 | 2.28  | 0.53 | -0.22  |
| 0.14  | 3147.00 | 1.49  | 1.02  | -0.54 | 3130.00 | 3.13  | 0.32 | 0.14   |
| 0.56  | 3123.00 | 0.96  | 1.55  | -0.83 | 4509.00 | 6.14  | 3.33 | 1.40   |
| 0.57  | 2048.00 | 0.34  | 2.17  | -1.16 | 3362.00 | 3.63  | 0.82 | 0.34   |
| 1.85  | 2281.00 | 0.66  | 1.85  | -0.99 | 2927.00 | 5.19  | 2.38 | 1.00   |
| 0.49  | 1812.00 | 0.88  | 1.63  | -0.87 | 2745.00 | 2.73  | 0.08 | -0.03  |
| 0.63  | 2193.00 | 1.32  | 1.19  | -0.64 | 3680.00 | 10.46 | 7.65 | 3.21   |
| 2.36  | 3621.00 | 1.41  | 1.10  | -0.59 | 3527.00 | 7.29  | 4.48 | 1.88   |
| 0.71  | 2716.00 | 0.77  | 1.74  | -0.93 | 3550.00 | 4.87  | 2.06 | 0.87   |
| 0.67  | 1893.00 | 0.58  | 1.93  | -1.03 | 2122.00 | 5.09  | 2.28 | 0.96   |
| 1.05  | 3075.00 | 0.07  | 2.44  | -1.31 | 3938.00 | 4.06  | 1.25 | 0.53   |
| -1.28 | 1877.00 | 1.86  | 0.65  | -0.35 | 3204.00 | 2.09  | 0.72 | -0.30  |
| -1.08 | 1185.00 | 2.03  | 0.48  | -0.26 | 1801.00 | 2.50  | 0.31 | -0.13  |
| 0.27  | 2574.00 | 8.66  | 6.15  | 3.29  | 1582.00 | 8.60  | 5.79 | 2.43 y |
| -0.25 | 1696.00 | 1.89  | 0.62  | -0.33 | 1827.00 | 3.23  | 0.42 | 0.18   |
| -0.21 | 1141.00 | 2.02  | 0.49  | -0.26 | 2078.00 | 3.42  | 0.61 | 0.25   |
| -0.44 | 5109.00 | 13.43 | 10.92 | 5.84  | 1162.00 | 2.58  | 0.23 | -0.10  |
| 1.78  | 2857.00 | 8.89  | 6.38  | 3.41  | 3269.00 | 12.70 | 9.89 | 4.14 y |
| 0.81  | 1918.00 | 2.50  | 0.01  | 0.00  | 3028.00 | 4.26  | 1.45 | 0.61   |
| 0.49  | 3016.00 | 2.09  | 0.42  | -0.23 | 3921.00 | 2.81  | 0.00 | 0.00   |
| -0.48 | 2113.00 | 4.35  | 1.84  | 0.99  | 2371.00 | 2.70  | 0.11 | -0.05  |
| 0.29  | 2976.00 | 5.24  | 2.73  | 1.46  | 2857.00 | 4.48  | 1.67 | 0.70   |
| 0.85  | 2851.00 | 3.86  | 1.35  | 0.72  | 2894.00 | 3.84  | 1.03 | 0.43   |
| 1.44  | 2087.00 | 3.11  | 0.60  | 0.32  | 1790.00 | 2.18  | 0.63 | -0.26  |
| 1.14  | 1652.00 | 1.33  | 1.18  | -0.63 | 2285.00 | 2.58  | 0.23 | -0.09  |
| 0.54  | 2958.00 | 1.08  | 1.43  | -0.76 | 3307.00 | 6.68  | 3.87 | 1.62   |
| 2.60  | 2635.00 | 2.77  | 0.26  | 0.14  | 2910.00 | 5.12  | 2.31 | 0.97   |
| 0.59  | 2884.00 | 1.66  | 0.85  | -0.45 | 3067.00 | 3.23  | 0.42 | 0.18   |
| 3.44  | 2179.00 | 1.97  | 0.54  | -0.29 | 1627.00 | 5.96  | 3.15 | 1.32   |
| 1.33  | 1985.00 | 1.91  | 0.60  | -0.32 | 2545.00 | 2.28  | 0.53 | -0.22  |
| 2.32  | 2884.00 | 2.60  | 0.09  | 0.05  | 3493.00 | 6.07  | 3.26 | 1.37   |
| -1.22 | 2026.00 | 1.28  | 1.23  | -0.66 | 1672.00 | 1.61  | 1.20 | -0.50  |
| -0.98 | 2328.00 | 1.29  | 1.22  | -0.65 | 1801.00 | 2.28  | 0.53 | -0.22  |
| 0.56  | 2464.00 | 2.80  | 0.29  | 0.15  | 2305.00 | 5.77  | 2.96 | 1.24   |
| 0.07  | 2342.00 | 1.24  | 1.27  | -0.68 | 2431.00 | 6.13  | 3.32 | 1.39   |
| -0.55 | 2396.00 | 0.33  | 2.18  | -1.16 | 3259.00 | 0.74  | 2.07 | -0.87  |
| -0.03 | 845.00  | 0.59  | 1.92  | -1.03 | 921.00  | 3.37  | 0.56 | 0.23   |
| -0.77 | 1993.00 | 0.65  | 1.86  | -0.99 | 1753.00 | 2.68  | 0.13 | -0.05  |
| -0.93 | 919.00  | 0.54  | 1.97  | -1.05 | 1441.00 | 2.43  | 0.38 | -0.16  |
| -0.66 | 2813.00 | 0.18  | 2.33  | -1.25 | 3641.00 | 1.46  | 1.35 | -0.57  |
| -0.24 | 2173.00 | 1.52  | 0.99  | -0.53 | 2902.00 | 2.41  | 0.40 | -0.17  |
| 0.48  | 2390.00 | 3.89  | 1.38  | 0.74  | 2245.00 | 3.52  | 0.71 | 0.30   |
| -0.04 | 1538.00 | 1.50  | 1.01  | -0.54 | 2229.00 | 2.11  | 0.70 | -0.29  |
| 2.07  | 2846.00 | 4.67  | 2.16  | 1.16  | 3472.00 | 6.83  | 4.02 | 1.68   |
| 0.22  | 2352.00 | 1.83  | 0.68  | -0.37 | 4066.00 | 1.52  | 1.29 | -0.54  |

|       |         |      |      |       |         |       |      |        |
|-------|---------|------|------|-------|---------|-------|------|--------|
| 0.87  | 1884.00 | 0.58 | 1.93 | -1.03 | 1899.00 | 1.69  | 1.12 | -0.47  |
| -0.50 | 1506.00 | 1.66 | 0.85 | -0.46 | 2730.00 | 1.25  | 1.56 | -0.65  |
| 0.14  | 1774.00 | 1.18 | 1.33 | -0.71 | 1644.00 | 1.03  | 1.78 | -0.74  |
| -0.50 | 2361.00 | 1.31 | 1.20 | -0.64 | 1324.00 | 1.51  | 1.30 | -0.54  |
| 0.44  | 2114.00 | 1.14 | 1.37 | -0.74 | 2435.00 | 2.18  | 0.63 | -0.26  |
| -0.25 | 1728.00 | 0.46 | 2.05 | -1.10 | 2432.00 | 1.23  | 1.58 | -0.66  |
| -0.35 | 3537.00 | 1.50 | 1.01 | -0.54 | 1724.00 | 2.78  | 0.03 | -0.01  |
| -1.25 | 1925.00 | 2.44 | 0.07 | -0.04 | 2293.00 | 4.06  | 1.25 | 0.52   |
| -1.05 | 1698.00 | 3.53 | 1.02 | 0.55  | 1646.00 | 7.78  | 4.97 | 2.08   |
| -1.31 | 2125.00 | 2.73 | 0.22 | 0.12  | 1960.00 | 4.64  | 1.83 | 0.77   |
| -1.31 | 2586.00 | 1.16 | 1.35 | -0.72 | 3792.00 | 5.41  | 2.60 | 1.09   |
| -0.84 | 1672.00 | 2.33 | 0.18 | -0.10 | 1608.00 | 3.11  | 0.30 | 0.13   |
| -0.65 | 3473.00 | 3.40 | 0.89 | 0.47  | 3821.00 | 6.20  | 3.39 | 1.42   |
| -0.76 | 2455.00 | 2.81 | 0.30 | 0.16  | 2374.00 | 3.37  | 0.56 | 0.24   |
| -0.83 | 2236.00 | 3.76 | 1.25 | 0.67  | 3776.00 | 11.36 | 8.55 | 3.58   |
| -1.29 | 1543.00 | 2.46 | 0.05 | -0.03 | 2867.00 | 3.10  | 0.29 | 0.12   |
| -0.88 | 2033.00 | 1.72 | 0.79 | -0.42 | 2340.00 | 5.17  | 2.36 | 0.99   |
| -0.51 | 1557.00 | 1.61 | 0.90 | -0.48 | 2232.00 | 3.94  | 1.13 | 0.48   |
| 0.06  | 1714.00 | 0.88 | 1.63 | -0.88 | 2194.00 | 4.56  | 1.75 | 0.73   |
| -0.40 | 1892.00 | 1.59 | 0.92 | -0.50 | 2494.00 | 6.17  | 3.36 | 1.41   |
| 0.02  | 1681.00 | 2.68 | 0.17 | 0.09  | 1696.00 | 4.19  | 1.38 | 0.58   |
| -0.34 | 2309.00 | 2.99 | 0.48 | 0.26  | 2128.00 | 10.76 | 7.95 | 3.33   |
| 0.13  | 1969.00 | 3.45 | 0.94 | 0.50  | 2471.00 | 4.90  | 2.09 | 0.87   |
| 0.27  | 1772.00 | 2.71 | 0.20 | 0.11  | 2558.00 | 5.94  | 3.13 | 1.31   |
| -0.39 | 1722.00 | 1.05 | 1.46 | -0.78 | 2912.00 | 4.40  | 1.59 | 0.66   |
| -0.09 | 3091.00 | 3.11 | 0.60 | 0.32  | 3021.00 | 3.94  | 1.13 | 0.47   |
| -1.07 | 2628.00 | 3.23 | 0.72 | 0.39  | 1806.00 | 0.55  | 2.26 | -0.94  |
| -0.55 | 1959.00 | 5.82 | 3.31 | 1.77  | 1867.00 | 2.62  | 0.19 | -0.08  |
| -0.86 | 2163.00 | 3.24 | 0.73 | 0.39  | 2527.00 | 1.31  | 1.50 | -0.63  |
| -0.15 | 2393.00 | 5.52 | 3.01 | 1.61  | 2001.00 | 2.70  | 0.11 | -0.05  |
| -0.09 | 1968.00 | 2.29 | 0.22 | -0.12 | 1886.00 | 3.76  | 0.95 | 0.40   |
| -0.58 | 1713.00 | 2.80 | 0.29 | 0.16  | 1489.00 | 1.07  | 1.74 | -0.73  |
| 0.87  | 1642.00 | 8.34 | 5.83 | 3.12  | 1599.00 | 9.63  | 6.82 | 2.86 x |
| -0.03 | 1542.00 | 5.38 | 2.87 | 1.54  | 1847.00 | 1.57  | 1.24 | -0.52  |
| -0.83 | 1903.00 | 3.52 | 1.01 | 0.54  | 1948.00 | 2.16  | 0.65 | -0.27  |
| -0.34 | 2184.00 | 3.94 | 1.43 | 0.76  | 1788.00 | 1.90  | 0.91 | -0.38  |
| -0.85 | 736.00  | 2.04 | 0.47 | -0.25 | 879.00  | 1.14  | 1.67 | -0.70  |
| -0.50 | 1459.00 | 0.75 | 1.76 | -0.94 | 723.00  | 0.69  | 2.12 | -0.89  |
| -0.73 | 2474.00 | 2.10 | 0.41 | -0.22 | 2673.00 | 1.95  | 0.86 | -0.36  |
| -0.61 | 2843.00 | 3.06 | 0.55 | 0.29  | 2310.00 | 3.16  | 0.35 | 0.15   |
| -1.11 | 1577.00 | 2.85 | 0.34 | 0.18  | 1119.00 | 1.34  | 1.47 | -0.62  |
| 0.26  | 2241.00 | 1.47 | 1.04 | -0.56 | 1796.00 | 3.29  | 0.48 | 0.20   |
| 0.48  | 1230.00 | 3.25 | 0.74 | 0.40  | 1170.00 | 6.32  | 3.51 | 1.47   |
| -0.20 | 1765.00 | 3.23 | 0.72 | 0.38  | 1852.00 | 4.05  | 1.24 | 0.52   |
| -0.75 | 1862.00 | 2.20 | 0.31 | -0.17 | 1680.00 | 8.93  | 6.12 | 2.56   |

|       |         |      |      |       |         |       |       |        |
|-------|---------|------|------|-------|---------|-------|-------|--------|
| -0.40 | 1740.00 | 1.26 | 1.25 | -0.67 | 915.00  | 7.43  | 4.62  | 1.94   |
| 0.51  | 2773.00 | 1.44 | 1.07 | -0.57 | 3196.00 | 1.00  | 1.81  | -0.76  |
| 0.09  | 2490.00 | 0.76 | 1.75 | -0.94 | 1844.00 | 2.71  | 0.10  | -0.04  |
| 1.07  | 2003.00 | 2.15 | 0.36 | -0.19 | 1617.00 | 1.30  | 1.51  | -0.63  |
| 0.16  | 2610.00 | 1.30 | 1.21 | -0.65 | 2517.00 | 0.99  | 1.82  | -0.76  |
| 0.24  | 2841.00 | 1.58 | 0.93 | -0.50 | 1605.00 | 0.62  | 2.19  | -0.92  |
| 1.77  | 1422.00 | 0.77 | 1.74 | -0.93 | 888.00  | 2.36  | 0.45  | -0.19  |
| 0.98  | 2035.00 | 0.79 | 1.72 | -0.92 | 1687.00 | 1.36  | 1.45  | -0.61  |
| 1.42  | 1310.00 | 0.61 | 1.90 | -1.02 | 1436.00 | 2.23  | 0.58  | -0.24  |
| 1.30  | 1717.00 | 1.16 | 1.35 | -0.72 | 1236.00 | 1.54  | 1.27  | -0.53  |
| 2.72  | 908.00  | 1.21 | 1.30 | -0.70 | 1345.00 | 1.86  | 0.95  | -0.40  |
| -0.23 | 1781.00 | 0.56 | 1.95 | -1.04 | 1815.00 | 1.54  | 1.27  | -0.53  |
| 0.52  | 1752.00 | 2.85 | 0.34 | 0.18  | 2369.00 | 6.16  | 3.35  | 1.41   |
| 0.49  | 1844.00 | 1.95 | 0.56 | -0.30 | 3060.00 | 5.82  | 3.01  | 1.26   |
| 1.40  | 1444.00 | 2.29 | 0.22 | -0.12 | 2524.00 | 5.43  | 2.62  | 1.10   |
| 1.37  | 1669.00 | 0.84 | 1.67 | -0.89 | 2351.00 | 1.83  | 0.98  | -0.41  |
| 0.61  | 1870.00 | 1.60 | 0.91 | -0.49 | 3002.00 | 5.73  | 2.92  | 1.22   |
| 1.18  | 1879.00 | 0.59 | 1.92 | -1.03 | 2578.00 | 9.74  | 6.93  | 2.90   |
| 0.90  | 2055.00 | 2.19 | 0.32 | -0.17 | 3361.00 | 5.44  | 2.63  | 1.10   |
| 0.15  | 2632.00 | 1.67 | 0.84 | -0.45 | 2881.00 | 5.62  | 2.81  | 1.18   |
| 1.05  | 1325.00 | 0.91 | 1.60 | -0.86 | 1880.00 | 5.32  | 2.51  | 1.05   |
| 0.79  | 1788.00 | 6.54 | 4.03 | 2.16  | 2402.00 | 6.54  | 3.73  | 1.56   |
| 3.16  | 1881.00 | 9.78 | 7.27 | 3.89  | 2700.00 | 8.15  | 5.34  | 2.24 y |
| 0.95  | 1914.00 | 5.02 | 2.51 | 1.34  | 2152.00 | 3.07  | 0.26  | 0.11   |
| 2.02  | 3356.00 | 6.97 | 4.46 | 2.39  | 3949.00 | 7.34  | 4.53  | 1.90 y |
| 1.14  | 2332.00 | 2.49 | 0.02 | -0.01 | 2308.00 | 2.64  | 0.17  | -0.07  |
| 1.72  | 3052.00 | 2.62 | 0.11 | 0.06  | 1712.00 | 5.32  | 2.51  | 1.05   |
| 2.34  | 2554.00 | 3.76 | 1.25 | 0.67  | 2036.00 | 3.63  | 0.82  | 0.35   |
| 2.01  | 1275.00 | 4.94 | 2.43 | 1.30  | 1146.00 | 5.93  | 3.12  | 1.31   |
| 1.10  | 1959.00 | 1.68 | 0.83 | -0.44 | 1826.00 | 4.22  | 1.41  | 0.59   |
| 1.54  | 732.00  | 2.46 | 0.05 | -0.03 | 1278.00 | 4.30  | 1.49  | 0.63   |
| -0.50 | 1810.00 | 0.61 | 1.90 | -1.02 | 1697.00 | 1.94  | 0.87  | -0.36  |
| 1.03  | 1205.00 | 1.00 | 1.51 | -0.81 | 636.00  | 4.40  | 1.59  | 0.67   |
| 1.90  | 3794.00 | 3.85 | 1.34 | 0.72  | 2452.00 | 12.60 | 9.79  | 4.10   |
| 0.32  | 2969.00 | 3.33 | 0.82 | 0.44  | 1307.00 | 2.91  | 0.10  | 0.04   |
| -0.56 | 1693.00 | 0.89 | 1.62 | -0.87 | 1487.00 | 1.61  | 1.20  | -0.50  |
| 1.44  | 2545.00 | 2.32 | 0.19 | -0.10 | 2427.00 | 4.86  | 2.05  | 0.86   |
| -0.63 | 712.00  | 0.42 | 2.09 | -1.12 | 1144.00 | 4.98  | 2.17  | 0.91   |
| -0.45 | 1618.00 | 1.30 | 1.21 | -0.65 | 2286.00 | 9.67  | 6.86  | 2.87   |
| 9.17  | 2261.00 | 5.57 | 3.06 | 1.64  | 1456.00 | 24.79 | 21.98 | 9.21 y |
| -0.29 | 991.00  | 1.11 | 1.40 | -0.75 | 2232.00 | 4.30  | 1.49  | 0.63   |
| -0.63 | 2421.00 | 0.87 | 1.64 | -0.88 | 3237.00 | 6.49  | 3.68  | 1.54   |
| -1.00 | 2135.00 | 1.41 | 1.10 | -0.59 | 758.00  | 2.90  | 0.09  | 0.04   |
| -1.10 | 2419.00 | 0.54 | 1.97 | -1.06 | 1627.00 | 3.81  | 1.00  | 0.42   |
| 0.36  | 2141.00 | 0.98 | 1.53 | -0.82 | 1605.00 | 4.80  | 1.99  | 0.83   |

|       |         |      |      |       |         |       |      |         |
|-------|---------|------|------|-------|---------|-------|------|---------|
| -0.29 | 3407.00 | 0.97 | 1.54 | -0.83 | 2597.00 | 6.70  | 3.89 | 1.63    |
| -1.03 | 1383.00 | 0.65 | 1.86 | -1.00 | 1790.00 | 3.41  | 0.60 | 0.25    |
| -0.40 | 1554.00 | 0.32 | 2.19 | -1.17 | 1198.00 | 1.17  | 1.64 | -0.69   |
| -0.77 | 1565.00 | 1.02 | 1.49 | -0.80 | 825.00  | 6.67  | 3.86 | 1.62    |
| -0.21 | 992.00  | 1.01 | 1.50 | -0.80 | 583.00  | 3.09  | 0.28 | 0.12    |
| -0.40 | 1068.00 | 3.75 | 1.24 | 0.66  | 963.00  | 3.53  | 0.72 | 0.30    |
| -0.16 | 2299.00 | 1.35 | 1.16 | -0.62 | 2329.00 | 8.72  | 5.91 | 2.48    |
| -0.86 | 1361.00 | 1.62 | 0.89 | -0.48 | 1451.00 | 6.27  | 3.46 | 1.45    |
| -0.97 | 1588.00 | 2.64 | 0.13 | 0.07  | 1205.00 | 8.71  | 5.90 | 2.47    |
| 0.34  | 1465.00 | 1.50 | 1.01 | -0.54 | 2217.00 | 5.32  | 2.51 | 1.05    |
| -0.42 | 1485.00 | 1.89 | 0.62 | -0.33 | 1475.00 | 2.51  | 0.30 | -0.13   |
| -0.06 | 2568.00 | 3.35 | 0.84 | 0.45  | 2265.00 | 3.80  | 0.99 | 0.41    |
| 0.25  | 2177.00 | 6.52 | 4.01 | 2.15  | 1900.00 | 4.26  | 1.45 | 0.61    |
| 0.30  | 2598.00 | 4.70 | 2.19 | 1.17  | 2512.00 | 12.22 | 9.41 | 3.94    |
| -0.86 | 1555.00 | 3.02 | 0.51 | 0.27  | 1520.00 | 2.89  | 0.08 | 0.04    |
| -1.14 | 1341.00 | 3.06 | 0.55 | 0.29  | 1871.00 | 4.17  | 1.36 | 0.57    |
| 1.73  | 1873.00 | 7.37 | 4.86 | 2.60  | 1636.00 | 2.81  | 0.00 | 0.00    |
| 2.58  | 2790.00 | 7.78 | 5.27 | 2.82  | 1805.00 | 1.94  | 0.87 | -0.36 y |
| -0.43 | 2302.00 | 2.74 | 0.23 | 0.12  | 864.00  | 0.69  | 2.12 | -0.89   |
| 2.82  | 2373.00 | 6.19 | 3.68 | 1.97  | 1415.00 | 0.57  | 2.24 | -0.94   |
| 0.94  | 2883.00 | 6.56 | 4.05 | 2.16  | 1813.00 | 1.65  | 1.16 | -0.48   |
| 0.59  | 1889.00 | 5.24 | 2.73 | 1.46  | 1127.00 | 0.53  | 2.28 | -0.95   |
| 2.38  | 1435.00 | 6.97 | 4.46 | 2.39  | 562.00  | 1.96  | 0.85 | -0.36 x |
| 0.16  | 1123.00 | 4.72 | 2.21 | 1.18  | 633.00  | 0.63  | 2.18 | -0.91   |
| 0.80  | 1512.00 | 4.37 | 1.86 | 0.99  | 495.00  | 2.02  | 0.79 | -0.33   |
| 0.84  | 996.00  | 2.81 | 0.30 | 0.16  | 877.00  | 0.91  | 1.90 | -0.79   |
| 2.16  | 2681.00 | 6.15 | 3.64 | 1.95  | 1368.00 | 3.07  | 0.26 | 0.11    |
| 4.56  | 1083.00 | 3.79 | 1.28 | 0.68  | 579.00  | 3.28  | 0.47 | 0.20    |
| 1.26  | 2134.00 | 6.56 | 4.05 | 2.17  | 2092.00 | 5.21  | 2.40 | 1.01    |
| 3.38  | 1374.00 | 5.97 | 3.46 | 1.85  | 1240.00 | 4.76  | 1.95 | 0.82    |
| 0.01  | 1656.00 | 1.51 | 1.00 | -0.54 | 1342.00 | 6.18  | 3.37 | 1.41    |
| 0.64  | 2494.00 | 2.49 | 0.02 | -0.01 | 1014.00 | 5.03  | 2.22 | 0.93    |
| 2.40  | 2220.00 | 7.12 | 4.61 | 2.46  | 1007.00 | 5.16  | 2.35 | 0.99 y  |
| 2.51  | 2022.00 | 2.28 | 0.24 | -0.13 | 2045.00 | 7.68  | 4.87 | 2.04 x  |
| 4.85  | 2403.00 | 4.79 | 2.28 | 1.22  | 2955.00 | 12.49 | 9.68 | 4.05 y  |
| 0.51  | 724.00  | 1.66 | 0.85 | -0.46 | 918.00  | 1.31  | 1.50 | -0.63   |
| -0.49 | 2371.00 | 2.40 | 0.11 | -0.06 | 1824.00 | 0.49  | 2.32 | -0.97   |
| -0.29 | 1962.00 | 3.62 | 1.11 | 0.59  | 1776.00 | 0.23  | 2.58 | -1.08   |
| -0.55 | 3033.00 | 2.44 | 0.07 | -0.04 | 1650.00 | 0.42  | 2.39 | -1.00   |
| 0.01  | 2127.00 | 4.89 | 2.38 | 1.27  | 1451.00 | 1.17  | 1.64 | -0.69   |
| 0.10  | 1289.00 | 1.78 | 0.73 | -0.39 | 1337.00 | 1.12  | 1.69 | -0.71   |
| -0.26 | 1580.00 | 2.03 | 0.48 | -0.26 | 1709.00 | 0.41  | 2.40 | -1.01   |
| 0.02  | 2020.00 | 5.15 | 2.64 | 1.41  | 1354.00 | 0.37  | 2.44 | -1.02   |
| -1.08 | 1429.00 | 2.87 | 0.36 | 0.19  | 978.00  | 0.51  | 2.30 | -0.96   |
| 1.52  | 1882.00 | 5.63 | 3.12 | 1.67  | 1582.00 | 1.20  | 1.61 | -0.67   |

|       |         |      |      |       |         |       |      |        |
|-------|---------|------|------|-------|---------|-------|------|--------|
| -1.08 | 2114.00 | 2.32 | 0.19 | -0.10 | 2255.00 | 0.93  | 1.88 | -0.79  |
| 0.90  | 1544.00 | 5.57 | 3.06 | 1.64  | 1645.00 | 4.98  | 2.17 | 0.91   |
| 0.21  | 1258.00 | 4.61 | 2.10 | 1.12  | 1371.00 | 2.41  | 0.40 | -0.17  |
| -0.32 | 2816.00 | 2.63 | 0.12 | 0.06  | 1805.00 | 0.83  | 1.98 | -0.83  |
| 1.03  | 1390.00 | 6.76 | 4.25 | 2.28  | 1272.00 | 6.37  | 3.56 | 1.49   |
| 1.25  | 1858.00 | 3.12 | 0.61 | 0.33  | 1504.00 | 3.52  | 0.71 | 0.30   |
| 0.16  | 3011.00 | 3.85 | 1.34 | 0.72  | 1748.00 | 3.26  | 0.45 | 0.19   |
| 0.60  | 3100.00 | 3.74 | 1.23 | 0.66  | 1369.00 | 0.80  | 2.01 | -0.84  |
| 1.37  | 3516.00 | 4.10 | 1.59 | 0.85  | 2119.00 | 4.96  | 2.15 | 0.90   |
| 1.35  | 1165.00 | 2.32 | 0.19 | -0.10 | 960.00  | 1.56  | 1.25 | -0.52  |
| 0.32  | 1659.00 | 2.89 | 0.38 | 0.20  | 1594.00 | 8.97  | 6.16 | 2.58   |
| -0.41 | 1375.00 | 0.65 | 1.86 | -0.99 | 1238.00 | 5.41  | 2.60 | 1.09   |
| -0.36 | 1923.00 | 1.82 | 0.69 | -0.37 | 915.00  | 3.28  | 0.47 | 0.20   |
| -0.53 | 1876.00 | 2.35 | 0.16 | -0.09 | 1556.00 | 4.88  | 2.07 | 0.87   |
| -0.24 | 1476.00 | 1.08 | 1.43 | -0.76 | 2071.00 | 7.10  | 4.29 | 1.80   |
| -0.85 | 1936.00 | 1.03 | 1.48 | -0.79 | 1049.00 | 5.43  | 2.62 | 1.10   |
| -0.01 | 2084.00 | 1.30 | 1.21 | -0.65 | 973.00  | 4.42  | 1.61 | 0.67   |
| 0.26  | 1148.00 | 1.22 | 1.29 | -0.69 | 474.00  | 9.28  | 6.47 | 2.71   |
| 0.70  | 1994.00 | 3.46 | 0.95 | 0.51  | 934.00  | 5.57  | 2.76 | 1.16   |
| -0.58 | 1188.00 | 5.05 | 2.54 | 1.36  | 1466.00 | 4.30  | 1.49 | 0.62   |
| -0.19 | 629.00  | 0.79 | 1.72 | -0.92 | 792.00  | 10.48 | 7.67 | 3.21   |
| -1.01 | 2056.00 | 2.97 | 0.46 | 0.24  | 2038.00 | 6.58  | 3.77 | 1.58   |
| -0.85 | 1819.00 | 2.80 | 0.29 | 0.16  | 2283.00 | 4.03  | 1.22 | 0.51   |
| -0.87 | 2819.00 | 7.73 | 5.22 | 2.79  | 2565.00 | 8.42  | 5.61 | 2.35 x |
| -0.96 | 3072.00 | 4.82 | 2.31 | 1.23  | 2060.00 | 5.39  | 2.58 | 1.08   |
| -0.72 | 3103.00 | 3.90 | 1.39 | 0.74  | 3176.00 | 9.13  | 6.32 | 2.65   |
| -0.77 | 2654.00 | 3.47 | 0.96 | 0.51  | 4368.00 | 7.55  | 4.74 | 1.99   |
| -1.22 | 2340.00 | 1.28 | 1.23 | -0.66 | 2541.00 | 2.72  | 0.09 | -0.04  |
| -1.11 | 2140.00 | 3.74 | 1.23 | 0.66  | 2401.00 | 9.37  | 6.56 | 2.75   |
| -0.72 | 1021.00 | 1.08 | 1.43 | -0.77 | 2142.00 | 9.29  | 6.48 | 2.72   |
| -1.24 | 2270.00 | 2.33 | 0.18 | -0.09 | 1865.00 | 3.81  | 1.00 | 0.42   |
| 0.29  | 1679.00 | 6.02 | 3.51 | 1.88  | 1529.00 | 1.57  | 1.24 | -0.52  |
| -0.09 | 1247.00 | 4.73 | 2.22 | 1.19  | 867.00  | 1.96  | 0.85 | -0.36  |
| -0.20 | 822.00  | 3.65 | 1.14 | 0.61  | 1900.00 | 4.58  | 1.77 | 0.74   |
| -0.73 | 1439.00 | 3.27 | 0.76 | 0.40  | 1788.00 | 2.18  | 0.63 | -0.26  |
| -0.62 | 1814.00 | 6.67 | 4.16 | 2.23  | 1188.00 | 0.93  | 1.88 | -0.79  |
| 0.59  | 1215.00 | 4.53 | 2.02 | 1.08  | 1472.00 | 6.45  | 3.64 | 1.53   |
| -0.23 | 1018.00 | 5.50 | 2.99 | 1.60  | 1361.00 | 2.35  | 0.46 | -0.19  |
| -1.01 | 2130.00 | 4.37 | 1.86 | 0.99  | 1878.00 | 1.44  | 1.37 | -0.57  |
| -0.36 | 1268.00 | 3.63 | 1.12 | 0.60  | 926.00  | 3.02  | 0.21 | 0.09   |
| -0.95 | 1285.00 | 5.68 | 3.17 | 1.70  | 1578.00 | 1.20  | 1.61 | -0.67  |
| -1.01 | 1985.00 | 2.52 | 0.01 | 0.00  | 867.00  | 0.69  | 2.12 | -0.89  |
| -1.24 | 1661.00 | 2.11 | 0.40 | -0.22 | 535.00  | 2.06  | 0.75 | -0.32  |
| -1.01 | 229.00  | 3.06 | 0.55 | 0.29  | 1366.00 | 4.98  | 2.17 | 0.91   |
| -1.06 | 1767.00 | 5.15 | 2.64 | 1.41  | 1478.00 | 2.17  | 0.64 | -0.27  |



|         |         |         |       |         |         |      |         |       |
|---------|---------|---------|-------|---------|---------|------|---------|-------|
| -1.13   | 2034.00 | 2.31    | 0.20  | -0.11   | 2175.00 | 6.11 | 3.30    | 1.39  |
| -1.00   | 1879.00 | 1.38    | 1.13  | -0.60   | 987.00  | 3.75 | 0.94    | 0.39  |
| -1.35   | 666.00  | 2.55    | 0.04  | 0.02    | 579.00  | 3.11 | 0.30    | 0.13  |
| -1.11   | 1612.00 | 2.42    | 0.09  | -0.05   | 1564.00 | 6.52 | 3.71    | 1.56  |
| -0.92   | 1034.00 | 1.35    | 1.16  | -0.62   | 503.00  | 5.17 | 2.36    | 0.99  |
| -1.06   | 693.00  | 0.72    | 1.79  | -0.96   | 679.00  | 2.80 | 0.01    | 0.00  |
|         | 1968.50 | 2.51    | 1.26  |         | 2083.50 | 2.81 | 1.61    |       |
|         |         |         | 3.79  |         |         |      | 4.84    |       |
|         |         |         | 1.87  |         |         |      | 2.39    |       |
| 2886.00 | 19.23   |         |       |         |         |      | 2049.00 | 12.40 |
|         |         | 2460.00 | 26.10 | 2187.00 | 9.51    |      |         |       |
|         |         | 2249.00 | 31.13 | 1682.00 | 11.53   |      |         |       |
| 2529.00 | 17.91   | 3113.00 | 28.69 |         |         |      |         |       |
| 2707.50 | 18.57   | 2607.33 | 28.64 |         |         |      |         |       |
| 252.44  | 0.93    | 450.45  | 2.51  |         |         |      |         |       |
| 482.00  | 0.83    | 526.00  | 3.42  |         |         |      |         |       |
| 760.00  | 1.05    | 582.00  | 2.58  |         |         |      |         |       |
| 609.00  | 1.48    | 169.00  | 3.55  |         |         |      |         |       |
| 799.00  | 0.88    | 565.00  | 3.19  |         |         |      |         |       |
| 722.67  | 1.14    | 438.67  | 3.10  |         |         |      |         |       |
| 100.35  | 0.31    | 233.69  | 0.49  |         |         |      |         |       |
|         | 2.80    |         | 7.54  |         |         |      |         |       |
|         | 0.93    |         | 1.47  |         |         |      |         |       |
|         | 3.73    |         | 9.02  |         |         |      |         |       |
|         | 17.44   |         | 25.53 |         |         |      |         |       |
|         | 0.21    |         | 0.35  |         |         |      |         |       |
|         | 0.79    |         | 0.65  |         |         |      |         |       |
| 259.00  | 1.16    | 160.00  | 3.75  |         |         |      |         |       |
| 136.00  | 3.68    | 153.00  | 2.61  |         |         |      |         |       |
| 1863.00 | 6.82    | 2088.00 | 1.87  |         |         |      |         |       |
| 1206.00 | 1.24    | 1938.00 | 0.88  |         |         |      |         |       |
| 3219.00 | 10.41   | 3745.00 | 7.93  |         |         |      |         |       |
| 3998.00 | 2.18    | 3621.00 | 8.51  |         |         |      |         |       |







art b



debris b

debris b,c

debris a,b



| Plate    | Well | Gene                         | GeneID            | Cell Count | % inf | Abs Dev |
|----------|------|------------------------------|-------------------|------------|-------|---------|
| 50058.00 | A02  | M-021104- claudin 18         | 51208.00 CLDN18   | 2623.00    | 4.96  | 0.03    |
| 50058.00 | A04  | M-017708- coiled-coil doma   | 51204.00 CCDC44   | 2866.00    | 9.39  | 4.40    |
| 50058.00 | A05  | M-020518- stomatin (EPB72    | 30968.00 STOML2   | 2127.00    | 6.91  | 1.92    |
| 50058.00 | A06  | M-016299- DEAD (Asp-Glu-A    | 51202.00 DDX47    | 2428.00    | 4.82  | 0.17    |
| 50058.00 | A07  | M-005911- kallikrein-related | 43847.00 KLK14    | 1278.00    | 2.03  | 2.96    |
| 50058.00 | A08  | M-018402- zinc finger, DHH   | 51201.00 ZDHHC2   | 1212.00    | 12.95 | 7.96    |
| 50058.00 | A09  | M-005909- kallikrein-related | 43849.00 KLK12    | 2182.00    | 4.08  | 0.91    |
| 50058.00 | A10  | M-005818- carboxypeptidas    | 51200.00 CPA4     | 1958.00    | 10.78 | 5.79    |
| 50058.00 | A11  | M-013945- zinc finger protei | 49854.00 ZNF295   | 2594.00    | 15.92 | 10.93   |
| 50058.00 | A12  | M-019133- ninein (GSK3B in   | 51199.00 NIN      | 1478.00    | 6.50  | 1.51    |
| 50058.00 | A13  | M-010660- zinc finger protei | 49855.00 ZNF291   | 1877.00    | 12.47 | 7.48    |
| 50058.00 | A14  | M-004201- phospholipase C,   | 51196.00 PLCE1    | 1029.00    | 6.22  | 1.23    |
| 50058.00 | A15  | M-010574- cornulin           | 49860.00 CRNN     | 1269.00    | 6.54  | 1.55    |
| 50058.00 | A16  | M-015397- importin 11        | 51194.00 IPO11    | 2466.00    | 7.54  | 2.55    |
| 50058.00 | A17  | M-015771- G0/G1switch 2      | 50486.00 GOS2     | 4409.00    | 7.76  | 2.77    |
| 50058.00 | A18  | M-006984- zinc finger protei | 51193.00 ZNF639   | 1877.00    | 12.52 | 7.53    |
| 50058.00 | A19  | M-013059- CD207 molecule,    | 50489.00 CD207    | 2265.00    | 10.77 | 5.78    |
| 50058.00 | A20  | M-021092- synovial sarcoma   | 51188.00 SS18L2   | 881.00     | 15.10 | 10.11   |
| 50058.00 | A21  | M-010194- NADPH oxidase 4    | 50507.00 NOX4     | 2064.00    | 14.58 | 9.59    |
| 50058.00 | A23  | M-013866- NADPH oxidase 3    | 50508.00 NOX3     | 1929.00    | 9.95  | 4.96    |
| 50058.00 | B02  | M-005898- endogenous retr    | 51354.00 HUMRTLVI | 1266.00    | 2.76  | 2.23    |
| 50058.00 | B04  | M-021068- zinc finger protei | 51157.00 ZNF580   | 1643.00    | 4.32  | 0.67    |
| 50058.00 | B05  | M-021107- diferentiation-re  | 51212.00 LOC51212 | 2077.00    | 8.14  | 3.15    |
| 50058.00 | B06  | M-018403- hypothetical pro   | 51240.00 LOC51240 | 1275.00    | 1.33  | 3.66    |
| 50058.00 | B07  | M-021108- leucine zipper pr  | 51213.00 LUZP4    | 1730.00    | 4.10  | 0.89    |
| 50058.00 | B08  | M-021005- ubiquitin-fold m   | 51569.00 UFM1     | 3587.00    | 6.13  | 1.14    |
| 50058.00 | B09  | M-021112- glutaredoxin 5 h   | 51218.00 GLRX5    | 4471.00    | 10.56 | 5.57    |
| 50058.00 | B10  | M-013326- armadillo repeat   | 51566.00 ARMCX3   | 2855.00    | 8.48  | 3.49    |
| 50058.00 | B11  | M-021114- zinc finger protei | 51222.00 ZNF219   | 2405.00    | 9.40  | 4.41    |
| 50058.00 | B12  | M-007975- interleukin 23, al | 51561.00 IL23A    | 1329.00    | 2.63  | 2.36    |
| 50058.00 | B13  | M-021116- coatomer protei    | 51226.00 COP22    | 624.00     | 2.24  | 2.75    |
| 50058.00 | B14  | M-021096- 5'-nucleotidase c  | 51559.00 NT5DC3   | 3213.00    | 4.86  | 0.13    |
| 50058.00 | B15  | M-013176- phosphatidylinos   | 51227.00 PIGP     | 2660.00    | 3.31  | 1.68    |
| 50058.00 | B16  | M-021130- peroxisomal bio    | 51555.00 PEX5L    | 3449.00    | 5.04  | 0.05    |
| 50058.00 | B17  | M-017247- glycolipid transfe | 51228.00 GLTP     | 2962.00    | 3.61  | 1.38    |
| 50058.00 | B18  | M-009934- RAB14, member      | 51552.00 RAB14    | 3513.00    | 3.05  | 1.94    |
| 50058.00 | B19  | M-015234- PHD finger prote   | 51230.00 PHF20    | 3262.00    | 3.80  | 1.19    |
| 50058.00 | B20  | M-013306- sirtuin (silent ma | 51548.00 SIRT6    | 2634.00    | 2.92  | 2.07    |
| 50058.00 | B21  | M-008492- cysteine rich trar | 51232.00 CRIM1    | 3281.00    | 3.54  | 1.45    |
| 50058.00 | B23  | M-021124- hypothetical pro   | 51233.00 LOC51233 | 3527.00    | 2.69  | 2.30    |
| 50058.00 | C02  | M-013170- chromosome 15      | 51187.00 C15orf15 | 2468.00    | 2.59  | 2.40    |
| 50058.00 | C04  | M-021090- WW domain bin      | 51186.00 WBP5     | 1664.00    | 2.76  | 2.23    |
| 50058.00 | C05  | M-016025- synaptonemal cc    | 50511.00 SYCP3    | 3276.00    | 5.16  | 0.17    |

|              |                              |                    |         |       |       |
|--------------|------------------------------|--------------------|---------|-------|-------|
| 50058.00 C06 | M-021086- cereblon           | 51185.00 CRBN      | 4953.00 | 6.76  | 1.77  |
| 50058.00 C07 | M-020755- podocalyxin-like   | 50512.00 PODXL2    | 5640.00 | 10.07 | 5.08  |
| 50058.00 C08 | M-016860- ATP binding domr   | 51184.00 ATPBD1C   | 4005.00 | 4.04  | 0.95  |
| 50058.00 C09 | M-008882- carbohydrate (c    | 50515.00 CHST11    | 5036.00 | 10.15 | 5.16  |
| 50058.00 C10 | M-021084- heat shock 70kD    | 51182.00 HSPA14    | 3932.00 | 4.71  | 0.29  |
| 50058.00 C11 | M-007968- interleukin 20     | 50604.00 IL20      | 4751.00 | 5.83  | 0.84  |
| 50058.00 C12 | M-009893- hydroxyacid oxid   | 51179.00 HAO2      | 3994.00 | 14.57 | 9.58  |
| 50058.00 C13 | M-013069- UDP-N-acetyl-alf   | 50614.00 GALNT9    | 4167.00 | 9.94  | 4.95  |
| 50058.00 C14 | M-016800- pleckstrin homol   | 51177.00 PLEKHO1   | 3077.00 | 6.43  | 1.44  |
| 50058.00 C15 | M-017817- differentially exp | 50619.00 DEF6      | 3943.00 | 8.12  | 3.13  |
| 50058.00 C16 | M-021076- N-acetylglucosar   | 51172.00 NAGPA     | 4212.00 | 6.48  | 1.49  |
| 50058.00 C17 | M-018079- CUB and zona pe    | 50624.00 CUZD1     | 4198.00 | 8.91  | 3.92  |
| 50058.00 C18 | M-015668- EGF-like-domain    | 51162.00 EGFL7     | 3102.00 | 8.38  | 3.39  |
| 50058.00 C19 | M-020756- gem (nuclear org   | 50628.00 GEMIN4    | 3011.00 | 2.86  | 2.13  |
| 50058.00 C20 | M-017937- chromosome 3 c     | 51161.00 C3orf18   | 4496.00 | 21.24 | 16.25 |
| 50058.00 C21 | M-021560- solute carrier far | 50651.00 SLC45A1   | 4210.00 | 11.07 | 6.08  |
| 50058.00 C23 | M-010040- neurogenin 3       | 50674.00 NEUROG3   | 3416.00 | 6.65  | 1.66  |
| 50058.00 D02 | M-007774- sirtuin (silent ma | 51547.00 SIRT7     | 4690.00 | 5.99  | 1.00  |
| 50058.00 D04 | M-021158- zinc finger protei | 51545.00 ZNF581    | 2934.00 | 3.78  | 1.21  |
| 50058.00 D05 | M-021126- transmembrane      | 51234.00 TMEM85    | 4261.00 | 2.02  | 2.97  |
| 50058.00 D06 | M-021174- vacuolar protein   | 51542.00 VPS54     | 3942.00 | 3.15  | 1.84  |
| 50058.00 D07 | M-014264- chromosome 8 c     | 51236.00 C8orf30A  | 5123.00 | 6.11  | 1.12  |
| 50058.00 D08 | M-017175- selenocysteine ly  | 51540.00 SCLY      | 4112.00 | 5.47  | 0.48  |
| 50058.00 D09 | M-004433- hypothetical pro   | 51237.00 MGC29506  | 5655.00 | 4.92  | 0.07  |
| 50058.00 D10 | M-016869- zinc finger, CCHC  | 51538.00 ZCCHC17   | 4506.00 | 7.19  | 2.20  |
| 50058.00 D11 | M-019465- ankyrin repeat d   | 51239.00 ANKRD39   | 3480.00 | 12.90 | 7.91  |
| 50058.00 D12 | M-021196- mitochondrial pr   | 51537.00 MTP18     | 3677.00 | 7.61  | 2.62  |
| 50058.00 D13 | M-021166- chromosome 14      | 51241.00 C14orf112 | 1838.00 | 1.14  | 3.85  |
| 50058.00 D14 | M-021306- periphilin 1       | 51535.00 PPHLN1    | 3247.00 | 5.88  | 0.89  |
| 50058.00 D15 | M-019087- chromosome 3 c     | 51244.00 C3orf19   | 4552.00 | 5.87  | 0.88  |
| 50058.00 D16 | M-016969- Vps20-associate    | 51534.00 VTA1      | 3708.00 | 5.31  | 0.32  |
| 50058.00 D17 | M-004446- scotin             | 51246.00 SCOTIN    | 2621.00 | 1.49  | 3.50  |
| 50058.00 D18 | M-019179- PHD finger prote   | 51533.00 PHF7      | 3951.00 | 4.61  | 0.38  |
| 50058.00 D19 | M-015376- poly(A) binding p  | 51247.00 PAIP2     | 3075.00 | 3.61  | 1.38  |
| 50058.00 D20 | M-014262- chromosome 9 c     | 51531.00 C9orf156  | 3703.00 | 14.99 | 10.00 |
| 50058.00 D21 | M-021134- PDZ domain con     | 51248.00 PDZD11    | 5312.00 | 9.49  | 4.50  |
| 50058.00 D23 | M-021136- transmembrane      | 51249.00 TMEM69    | 4108.00 | 7.89  | 2.90  |
| 50058.00 E02 | M-006486- vacuolar protein   | 51160.00 VPS28     | 4066.00 | 2.31  | 2.68  |
| 50058.00 E04 | M-021065- hematological ar   | 51155.00 HN1       | 3738.00 | 5.75  | 0.76  |
| 50058.00 E05 | M-013062- WD repeat dom      | 50717.00 WDR42A    | 3630.00 | 6.25  | 1.26  |
| 50058.00 E06 | M-021065- hematological ar   | 51155.00 HN1       | 3449.00 | 8.06  | 3.07  |
| 50058.00 E07 | M-006263- potassium chanr    | 50801.00 KCNK4     | 4614.00 | 5.37  | 0.38  |
| 50058.00 E08 | M-013121- mRNA turnover      | 51154.00 MRTO4     | 2844.00 | 3.41  | 1.58  |
| 50058.00 E09 | M-015392- myelin expressio   | 50804.00 MYEF2     | 3230.00 | 7.59  | 2.60  |

|                     |                                 |                           |                |              |              |
|---------------------|---------------------------------|---------------------------|----------------|--------------|--------------|
| 50058.00 E10        | M-015303- stromal cell deriv    | 51150.00 SDF4             | 2612.00        | 6.16         | 1.17         |
| 50058.00 E11        | M-031961- development an        | 50807.00 DDEF1            | 1761.00        | 4.60         | 0.39         |
| 50058.00 E12        | M-021060- hypothetical LOC      | 51149.00 LOC51149         | 2371.00        | 6.62         | 1.63         |
| 50058.00 E13        | M-020867- heterochromatir       | 50809.00 HP1BP3           | 2519.00        | 4.25         | 0.74         |
| 50058.00 E14        | M-021045- dynein, cytoplas      | 51143.00 DYNC1LI1         | 2209.00        | 4.16         | 0.83         |
| <b>50058.00 E15</b> | <b>M-017093- hepatoma-deriv</b> | <b>50810.00 HDGFRP3</b>   | <b>3978.00</b> | <b>18.48</b> | <b>13.49</b> |
| 50058.00 E16        | M-019120- coiled-coil-helix-    | 51142.00 CHCHD2           | 2749.00        | 3.56         | 1.43         |
| 50058.00 E17        | M-020873- COP9 constitutiv      | 50813.00 COPS7A           | 2941.00        | 10.07        | 5.08         |
| 50058.00 E18        | M-021037- COP9 constitutiv      | 51138.00 COPS4            | 2488.00        | 3.70         | 1.29         |
| 50058.00 E19        | M-013110- villin-like           | 50853.00 VILL             | 3617.00        | 4.70         | 0.29         |
| 50058.00 E20        | M-010205- PTD016 protein        | 51136.00 LOC51136         | 3768.00        | 5.60         | 0.61         |
| 50058.00 E21        | M-020876- chromosome 6 c        | 50854.00 C6orf48          | 4177.00        | 5.41         | 0.42         |
| 50058.00 E23        | M-013859- par-6 partitionin     | 50855.00 PARD6A           | 2261.00        | 3.32         | 1.67         |
| 50058.00 F02        | M-016879- zinc finger, C3HC     | 51530.00 ZC3HC1           | 3412.00        | 5.66         | 0.67         |
| <b>50058.00 F04</b> | <b>M-016876- chromosome 14</b>  | <b>51528.00 C14orf100</b> | <b>2433.00</b> | <b>12.82</b> | <b>7.83</b>  |
| 50058.00 F05        | M-021137- chromosome 6 c        | 51250.00 C6orf203         | 3047.00        | 3.48         | 1.51         |
| 50058.00 F06        | M-020252- chromosome 14         | 51527.00 C14orf129        | 2037.00        | 14.09        | 9.10         |
| 50058.00 F07        | M-018884- hypothetical pro      | 51252.00 LOC51252         | 2455.00        | 4.89         | 0.10         |
| 50058.00 F08        | M-015649- chromosome 20         | 51526.00 C20orf111        | 1545.00        | 3.50         | 1.49         |
| 50058.00 F09        | M-017460- mitochondrial rit     | 51253.00 MRPL37           | 2478.00        | 6.50         | 1.51         |
| 50058.00 F10        | M-020266- transmembrane         | 51524.00 TMEM138          | 2412.00        | 5.93         | 0.94         |
| 50058.00 F11        | M-006985- hypothetical pro      | 51255.00 LOC51255         | 1890.00        | 4.92         | 0.07         |
| 50058.00 F12        | M-018807- CXXC finger 5         | 51523.00 CXXC5            | 1627.00        | 1.97         | 3.02         |
| 50058.00 F13        | M-021140- TBC1 domain far       | 51256.00 TBC1D7           | 1814.00        | 6.67         | 1.68         |
| 50058.00 F14        | M-020269- transmembrane         | 51522.00 TMEM14C          | 1929.00        | 3.78         | 1.21         |
| 50058.00 F15        | M-006986- membrane-asso         | 51257.00 MARCH2           | 1735.00        | 3.11         | 1.88         |
| 50058.00 F16        | M-010171- leucyl-tRNA synt      | 51520.00 LARS             | 1382.00        | 2.75         | 2.24         |
| 50058.00 F17        | M-013563- mitochondrial rit     | 51258.00 MRPL51           | 2616.00        | 3.33         | 1.66         |
| 50058.00 F18        | M-004697- chromatin modif       | 51510.00 CHMP5            | 3504.00        | 1.40         | 3.59         |
| 50058.00 F19        | M-017173- HSPC244               | 51259.00 MGC13379         | 2785.00        | 6.00         | 1.01         |
| 50058.00 F20        | M-020569- chromosome 20         | 51507.00 C20orf43         | 2842.00        | 2.99         | 2.00         |
| <b>50058.00 F21</b> | <b>M-018898- chromosome X c</b> | <b>51260.00 CXorf26</b>   | <b>3960.00</b> | <b>6.89</b>  | <b>1.90</b>  |
| 50058.00 F23        | M-013181- mitochondrial rit     | 51263.00 MRPL30           | 2922.00        | 0.89         | 4.10         |
| 50058.00 G02        | M-021034- coiled-coil doma      | 51134.00 CCDC41           | 3926.00        | 1.38         | 3.61         |
| 50058.00 G04        | M-021032- potassium chanr       | 51133.00 KCTD3            | 3479.00        | 3.28         | 1.71         |
| 50058.00 G05        | M-021372- C-type lectin dor     | 50856.00 CLEC4A           | 5852.00        | 4.97         | 0.02         |
| 50058.00 G06        | M-006982- ring finger protei    | 51132.00 RNF12            | 4255.00        | 4.94         | 0.05         |
| 50058.00 G07        | M-020879- sparc/osteonecti      | 50859.00 SPOCK3           | 5312.00        | 2.97         | 2.02         |
| 50058.00 G08        | M-021310- PHD finger prote      | 51131.00 PHF11            | 3176.00        | 3.31         | 1.68         |
| 50058.00 G09        | M-006980- ring finger protei    | 50862.00 RNF141           | 3543.00        | 5.56         | 0.57         |
| 50058.00 G10        | M-017457- ankyrin repeat a      | 51130.00 ASB3             | 3744.00        | 1.26         | 3.73         |
| 50058.00 G11        | M-013115- heme binding pr       | 50865.00 HEBP1            | 4134.00        | 3.27         | 1.72         |
| 50058.00 G12        | M-021029- SAR1 gene homc        | 51128.00 SAR1B            | 3528.00        | 4.39         | 0.60         |
| 50058.00 G13        | M-007664- phosphodiestera       | 50940.00 PDE11A           | 3677.00        | 3.40         | 1.59         |

|              |                              |                   |         |       |       |
|--------------|------------------------------|-------------------|---------|-------|-------|
| 50058.00 G14 | M-006981- tripartite motif-c | 51127.00 TRIM17   | 3167.00 | 2.75  | 2.24  |
| 50058.00 G15 | M-031945- SH3 and multiple   | 50944.00 SHANK1   | 4820.00 | 4.05  | 0.94  |
| 50058.00 G16 | M-008944- N-acetyltransfer   | 51126.00 NAT5     | 3520.00 | 2.53  | 2.46  |
| 50058.00 G17 | M-007854- transmembrane      | 50999.00 TMED5    | 3402.00 | 5.53  | 0.54  |
| 50058.00 G18 | M-021027- golgi autoantigen  | 51125.00 GOLGA7   | 4652.00 | 5.55  | 0.56  |
| 50058.00 G19 | M-007544- solute carrier far | 51000.00 SLC35B3  | 5017.00 | 3.27  | 1.72  |
| 50058.00 G20 | M-018948- immediate early    | 51124.00 IER3IP1  | 4097.00 | 3.00  | 1.99  |
| 50058.00 G21 | M-016763- MTERF domain c     | 51001.00 MTERFD1  | 4269.00 | 3.09  | 1.90  |
| 50058.00 G23 | M-031944- TP53RK binding p   | 51002.00 TPRKB    | 2296.00 | 1.70  | 3.29  |
| 50058.00 H02 | M-020623- ubiquitin-fold mo  | 51506.00 UFC1     | 2944.00 | 1.22  | 3.77  |
| 50058.00 H04 | M-020786- hypothetical pro   | 51504.00 HSPC152  | 1867.00 | 1.45  | 3.54  |
| 50058.00 H05 | M-013182- mitochondrial rit  | 51264.00 MRPL27   | 1733.00 | 1.15  | 3.84  |
| 50058.00 H06 | M-020788- hypothetical pro   | 51503.00 HSPC148  | 1961.00 | 0.61  | 4.38  |
| 50058.00 H07 | M-010199- pipercolic acid ox | 51268.00 PIPOX    | 2371.00 | 5.44  | 0.45  |
| 50058.00 H08 | M-016862- chromosome 11      | 51501.00 C11orf73 | 2640.00 | 1.48  | 3.51  |
| 50058.00 H09 | M-013860- transcription fac  | 51270.00 TFDP3    | 4132.00 | 4.55  | 0.44  |
| 50058.00 H10 | M-020809- TP53 regulated in  | 51499.00 TRIAP1   | 2875.00 | 0.87  | 4.12  |
| 50058.00 H11 | M-018850- blocked early in f | 51272.00 BET1L    | 4306.00 | 7.69  | 2.70  |
| 50058.00 H12 | M-020811- TH1-like (Drosop   | 51497.00 TH1L     | 1883.00 | 1.54  | 3.45  |
| 50058.00 H13 | M-021144- zinc finger protei | 51276.00 ZNF571   | 3478.00 | 4.43  | 0.56  |
| 50058.00 H14 | M-008272- CTD (carboxy-ter   | 51496.00 CTDSPL2  | 2376.00 | 10.19 | 5.20  |
| 50058.00 H15 | M-013467- immediate early    | 51278.00 IER5     | 2206.00 | 3.08  | 1.91  |
| 50058.00 H16 | M-010664- protein tyrosine   | 51495.00 PTPLAD1  | 3708.00 | 6.12  | 1.13  |
| 50058.00 H17 | M-007816- complement con     | 51279.00 C1RL     | 2697.00 | 4.56  | 0.43  |
| 50058.00 H18 | M-017647- chromosome 22      | 51493.00 C22orf28 | 4452.00 | 13.90 | 8.91  |
| 50058.00 H19 | M-013191- golgi phosphopre   | 51280.00 GOLPH2   | 5096.00 | 17.03 | 12.04 |
| 50058.00 H20 | M-016096- hypothetical pro   | 51491.00 HSPC111  | 2993.00 | 4.88  | 0.11  |
| 50058.00 H21 | M-020835- ankyrin repeat ar  | 51281.00 ANKMY1   | 3254.00 | 4.55  | 0.44  |
| 50058.00 H23 | M-013192- SCAN domain co     | 51282.00 SCAND1   | 2879.00 | 4.03  | 0.96  |
| 50058.00 I02 | M-021025- zinc finger protei | 51123.00 ZNF706   | 3380.00 | 3.93  | 1.06  |
| 50058.00 I04 | M-021024- COMM domain c      | 51122.00 COMMMD2  | 3012.00 | 7.47  | 2.48  |
| 50058.00 I05 | M-027282- mediator of RNA    | 51003.00 MED31    | 3813.00 | 5.14  | 0.15  |
| 50058.00 I06 | M-012864- ribosomal protei   | 51121.00 RPL26L1  | 2228.00 | 6.10  | 1.11  |
| 50058.00 I07 | M-009942- coenzyme Q6 ho     | 51004.00 COQ6     | 3618.00 | 7.88  | 2.89  |
| 50058.00 I08 | M-021018- UTP11-like, U3 s   | 51118.00 UTP11L   | 2225.00 | 4.49  | 0.50  |
| 50058.00 I09 | M-009449- solute carrier far | 51006.00 SLC35C2  | 2781.00 | 7.23  | 2.24  |
| 50058.00 I10 | M-021015- coenzyme Q4 ho     | 51117.00 COQ4     | 3623.00 | 7.65  | 2.66  |
| 50058.00 I11 | M-031954- activating signal  | 51008.00 ASCC1    | 3166.00 | 8.97  | 3.98  |
| 50058.00 I12 | M-013140- mitochondrial rit  | 51116.00 MRPS2    | 2262.00 | 3.01  | 1.98  |
| 50058.00 I13 | M-010576- Der1-like domair   | 51009.00 DERL2    | 948.00  | 3.59  | 1.40  |
| 50058.00 I14 | M-021013- family with sequ   | 51115.00 FAM82B   | 1524.00 | 7.55  | 2.56  |
| 50058.00 I15 | M-031955- exosome compo      | 51010.00 EXOSC3   | 3037.00 | 4.87  | 0.12  |
| 50058.00 I16 | M-021011- zinc finger, DHH   | 51114.00 ZDHHC9   | 2188.00 | 9.32  | 4.33  |
| 50058.00 I17 | M-020893- slowmo homolo      | 51012.00 SLMO2    | 2123.00 | 5.18  | 0.19  |

|                     |                                    |                        |                |              |              |
|---------------------|------------------------------------|------------------------|----------------|--------------|--------------|
| 50058.00 I18        | M-016861- tetratricopeptide        | 51112.00 TTC15         | 2969.00        | 10.61        | 5.62         |
| 50058.00 I19        | M-013122- exosome compo            | 51013.00 EXOSC1        | 1756.00        | 4.44         | 0.55         |
| 50058.00 I20        | M-013366- suppressor of va         | 51111.00 SUV420H1      | 2724.00        | 4.59         | 0.40         |
| 50058.00 I21        | M-007855- transmembrane            | 51014.00 TMED7         | 2572.00        | 1.75         | 3.24         |
| 50058.00 I23        | M-020895- isochorismatase          | 51015.00 ISOC1         | 1747.00        | 0.40         | 4.59         |
| 50058.00 J02        | M-010900- chromosome 9 c           | 51490.00 C9orf114      | 1971.00        | 2.64         | 2.35         |
| 50058.00 J04        | M-013295- variable charge,         | 51481.00 VCX3A         | 2442.00        | 2.33         | 2.66         |
| 50058.00 J05        | M-009634- RAS-like, family 1       | 51285.00 RASL12        | 3944.00        | 4.21         | 0.78         |
| 50058.00 J06        | M-006631- variable charge,         | 51480.00 VCX2          | 3073.00        | 6.57         | 1.58         |
| 50058.00 J07        | M-019006- cell cycle exit an       | 51286.00 CEND1         | 3328.00        | 2.43         | 2.56         |
| <b>50058.00 J08</b> | <b>M-013161- ankyrin repeat ar</b> | <b>51479.00 ANKFY1</b> | <b>2797.00</b> | <b>16.30</b> | <b>11.31</b> |
| 50058.00 J09        | M-021148- coiled-coil-helix-       | 51287.00 CHCHD8        | 3053.00        | 6.09         | 1.10         |
| 50058.00 J10        | M-009669- myo-inositol 1-p         | 51477.00 ISYNA1        | 1968.00        | 4.32         | 0.67         |
| 50058.00 J11        | M-021151- ERGIC and golgi          | 51290.00 ERGIC2        | 2208.00        | 4.76         | 0.23         |
| 50058.00 J12        | M-013284- calcium binding p        | 51475.00 CABP2         | 2525.00        | 3.29         | 1.70         |
| 50058.00 J13        | M-021160- GEM interacting          | 51291.00 GMIP          | 2914.00        | 6.18         | 1.19         |
| 50058.00 J14        | M-010663- LIM domain and           | 51474.00 LIMA1         | 3040.00        | 6.55         | 1.56         |
| 50058.00 J15        | M-010826- ECSIT homolog (l         | 51295.00 ECSIT         | 1498.00        | 3.14         | 1.85         |
| 50058.00 J16        | M-020868- doublecortin dor         | 51473.00 DCDC2         | 2226.00        | 2.61         | 2.38         |
| 50058.00 J17        | M-007400- solute carrier far       | 51296.00 SLC15A3       | 2619.00        | 7.03         | 2.04         |
| 50058.00 J18        | M-013269- N-acetyltransfer         | 51471.00 NAT8B         | 3111.00        | 4.73         | 0.26         |
| 50058.00 J19        | M-008613- palate, lung and         | 51297.00 PLUNC         | 2675.00        | 6.13         | 1.14         |
| 50058.00 J20        | M-020911- Scm-like with fou        | 51460.00 SFMBT1        | 3249.00        | 9.73         | 4.74         |
| 50058.00 J21        | M-019203- neuritin 1               | 51299.00 NRN1          | 3888.00        | 4.37         | 0.62         |
| 50058.00 J23        | M-021164- chromosome 3 c           | 51300.00 C3orf1        | 3251.00        | 5.66         | 0.67         |
| 50058.00 K02        | M-021008- lactamase, beta          | 51110.00 LACTB2        | 2289.00        | 3.06         | 1.93         |
| 50058.00 K04        | M-003629- retinol dehydrog         | 51109.00 RDH11         | 2010.00        | 8.66         | 3.67         |
| 50058.00 K05        | M-017638- chromosome 14            | 51016.00 C14orf122     | 2958.00        | 4.29         | 0.70         |
| 50058.00 K06        | M-015394- methyltransfera          | 51108.00 METTL9        | 2316.00        | 10.36        | 5.37         |
| 50058.00 K07        | M-017639- ribosomal RNA p          | 51018.00 RRP15         | 2401.00        | 5.58         | 0.59         |
| <b>50058.00 K08</b> | <b>M-007810- anterior pharynx</b>  | <b>51107.00 APH1A</b>  | <b>3795.00</b> | <b>11.41</b> | <b>6.42</b>  |
| 50058.00 K09        | M-020900- coiled-coil doma         | 51019.00 CCDC53        | 3375.00        | 7.05         | 2.06         |
| 50058.00 K10        | M-027322- PHD finger prote         | 51105.00 PHF20L1       | 3165.00        | 10.11        | 5.12         |
| 50058.00 K11        | M-009960- HD domain cont           | 51020.00 HDDC2         | 3265.00        | 8.94         | 3.95         |
| 50058.00 K12        | M-005809- family with sequ         | 51104.00 FAM108B1      | 2519.00        | 2.86         | 2.13         |
| <b>50058.00 K13</b> | <b>M-013130- mitochondrial rit</b> | <b>51021.00 MRPS16</b> | <b>3182.00</b> | <b>13.20</b> | <b>8.21</b>  |
| 50058.00 K14        | M-021003- NADH dehydrog            | 51103.00 NDUFAF1       | 2377.00        | 2.02         | 2.97         |
| 50058.00 K15        | M-013131- mitochondrial rit        | 51023.00 MRPS18C       | 2502.00        | 2.44         | 2.55         |
| 50058.00 K16        | M-021000- chromosome 8 c           | 51101.00 C8orf70       | 2281.00        | 4.47         | 0.52         |
| 50058.00 K17        | M-020907- fission 1 (mitoch        | 51024.00 FIS1          | 2880.00        | 4.41         | 0.58         |
| 50058.00 K18        | M-017086- SH3-domain GRE           | 51100.00 SH3GLB1       | 4129.00        | 7.34         | 2.35         |
| 50058.00 K19        | M-015261- mitochondria-as          | 51025.00 Magmas        | 4042.00        | 7.84         | 2.85         |
| 50058.00 K20        | M-020994- intraflagellar tra       | 51098.00 IFT52         | 4253.00        | 11.95        | <b>6.96</b>  |
| 50058.00 K21        | M-015393- golgi transport 1        | 51026.00 GOLT1B        | 2893.00        | 7.71         | 2.72         |

|              |                               |                   |         |       |       |
|--------------|-------------------------------|-------------------|---------|-------|-------|
| 50058.00 K23 | M-020910- bolA homolog 1      | 51027.00 BOLA1    | 2571.00 | 4.47  | 0.52  |
| 50058.00 L02 | M-020938- Rh family, C glyco  | 51458.00 RHCG     | 4002.00 | 4.50  | 0.49  |
| 50058.00 L04 | M-010198- prenylcysteine o    | 51449.00 PCYOX1   | 3514.00 | 5.86  | 0.87  |
| 50058.00 L05 | M-021167- glucosaminyl (N-    | 51301.00 GCNT4    | 2591.00 | 10.00 | 5.01  |
| 50058.00 L06 | M-006991- ring finger protei  | 51444.00 RNF138   | 3390.00 | 4.63  | 0.36  |
| 50058.00 L07 | M-008432- cytochrome P450     | 51302.00 CYP39A1  | 2992.00 | 8.22  | 3.23  |
| 50058.00 L08 | M-017939- vestigial like 1 (D | 51442.00 VGLL1    | 2744.00 | 4.41  | 0.58  |
| 50058.00 L09 | M-008687- zinc finger, DHH    | 51304.00 ZDHHC3   | 1698.00 | 4.95  | 0.04  |
| 50058.00 L10 | M-021009- YTH domain fam      | 51441.00 YTHDF2   | 2546.00 | 2.47  | 2.52  |
| 50058.00 L11 | M-020738- chromosome 5 c      | 51306.00 C5orf5   | 1658.00 | 5.49  | 0.50  |
| 50058.00 L12 | M-017416- hippocalcin like 4  | 51440.00 HPCAL4   | 1939.00 | 4.54  | 0.45  |
| 50058.00 L13 | M-021256- family with sequ    | 51307.00 FAM53C   | 3205.00 | 8.71  | 3.72  |
| 50058.00 L14 | M-021014- family with sequ    | 51439.00 FAM8A1   | 1845.00 | 5.75  | 0.76  |
| 50058.00 L15 | M-021201- receptor accesso    | 51308.00 REEP2    | 3292.00 | 5.41  | 0.42  |
| 50058.00 L16 | M-006683- melanoma antigen    | 51438.00 MAGEC2   | 3844.00 | 7.52  | 2.53  |
| 50058.00 L17 | M-013198- armadillo repeat    | 51309.00 ARMCX1   | 4371.00 | 11.33 | 6.34  |
| 50058.00 L18 | M-018234- chromosome 1 c      | 51430.00 C1orf9   | 5158.00 | 10.06 | 5.07  |
| 50058.00 L19 | M-007451- solute carrier far  | 51310.00 SLC22A17 | 4102.00 | 8.92  | 3.93  |
| 50058.00 L20 | M-010394- DEAD (Asp-Glu-A     | 51428.00 DDX41    | 4098.00 | 3.00  | 1.99  |
| 50058.00 L21 | M-007369- solute carrier far  | 51312.00 SLC25A37 | 4081.00 | 5.37  | 0.38  |
| 50058.00 L23 | M-018921- chromosome 4 c      | 51313.00 C4orf18  | 2751.00 | 2.76  | 2.23  |
| 50058.00 M02 | M-020992- saccharopine del    | 51097.00 SCCPDH   | 3309.00 | 5.02  | 0.03  |
| 50058.00 M04 | M-020991- UTP18, small suk    | 51096.00 UTP18    | 2447.00 | 2.25  | 2.74  |
| 50058.00 M05 | M-004701- vacuolar protein    | 51028.00 VPS36    | 2196.00 | 1.82  | 3.17  |
| 50058.00 M06 | M-016851- chromosome 1 c      | 51093.00 C1orf66  | 2817.00 | 3.83  | 1.16  |
| 50058.00 M07 | M-020915- chromosome 1 c      | 51029.00 C1orf121 | 3899.00 | 7.46  | 2.47  |
| 50058.00 M08 | M-020988- SID1 transmemb      | 51092.00 SIDT2    | 2893.00 | 4.53  | 0.46  |
| 50058.00 M09 | M-020922- family with sequ    | 51030.00 FAM18B   | 3531.00 | 4.47  | 0.52  |
| 50058.00 M10 | M-015559- Sep (O-phospho      | 51091.00 SEPSECS  | 2563.00 | 5.35  | 0.36  |
| 50058.00 M11 | M-019341- glyoxalase doma     | 51031.00 GLOD4    | 3756.00 | 2.34  | 2.65  |
| 50058.00 M12 | M-010932- plasma membrai      | 51090.00 PLLP     | 2281.00 | 1.32  | 3.67  |
| 50058.00 M13 | M-005862- elastase 2B         | 51032.00 ELA2B    | 3053.00 | 2.00  | 2.99  |
| 50058.00 M14 | M-010933- kelch-like 5 (Dro   | 51088.00 KLHL5    | 1523.00 | 2.69  | 2.30  |
| 50058.00 M15 | M-008652- SAPK substrate p    | 51035.00 LOC51035 | 1954.00 | 3.28  | 1.71  |
| 50058.00 M16 | M-020983- Y box binding pro   | 51087.00 YBX2     | 3506.00 | 2.25  | 2.74  |
| 50058.00 M17 | M-017089- zinc finger protei  | 51042.00 ZNF593   | 1919.00 | 1.04  | 3.95  |
| 50058.00 M18 | M-008730- crystallin, lambd   | 51084.00 CRYL1    | 1869.00 | 1.77  | 3.22  |
| 50058.00 M19 | M-020935- ST8 alpha-N-acet    | 51046.00 ST8SIA3  | 3540.00 | 3.90  | 1.09  |
| 50058.00 M20 | M-004139- galanin             | 51083.00 GAL      | 4530.00 | 2.74  | 2.25  |
| 50058.00 M21 | M-013135- peptidase inhibit   | 51050.00 PI15     | 3748.00 | 3.01  | 1.98  |
| 50058.00 M23 | M-020941- pleckstrin homol    | 51054.00 PLEKHA9  | 3023.00 | 0.93  | 4.06  |
| 50058.00 N02 | M-019229- zinc finger protei  | 51427.00 ZNF588   | 2573.00 | 5.83  | 0.84  |
| 50058.00 N04 | M-021038- polymerase (DN)     | 51426.00 POLK     | 2106.00 | 2.99  | 2.00  |
| 50058.00 N05 | M-020345- lysine-rich coiled  | 51315.00 KRCC1    | 3719.00 | 16.56 | 11.57 |



|              |                              |                    |         |       |       |
|--------------|------------------------------|--------------------|---------|-------|-------|
| 50058.00 N06 | M-013232- angiomotin like 2  | 51421.00 AMOTL2    | 2046.00 | 3.86  | 1.13  |
| 50058.00 N07 | M-020311- placenta-specific  | 51316.00 PLAC8     | 3951.00 | 11.24 | 6.25  |
| 50058.00 N08 | M-009829- HemK methyltra     | 51409.00 HEMK1     | 3790.00 | 10.34 | 5.35  |
| 50058.00 N09 | M-013206- mitochondrial rik  | 51318.00 MRPL35    | 3188.00 | 11.86 | 6.87  |
| 50058.00 N10 | M-013853- nucleolar proteir  | 51406.00 NOL7      | 2398.00 | 3.96  | 1.03  |
| 50058.00 N11 | M-020548- arginine/serine-r  | 51319.00 RSRC1     | 4774.00 | 20.00 | 15.01 |
| 50058.00 N12 | M-031953- heat shock trans   | 51402.00 HSF1      | 3863.00 | 18.30 | 13.31 |
| 50058.00 N13 | M-006989- ring finger and K  | 51320.00 RKHD2     | 2825.00 | 7.58  | 2.59  |
| 50058.00 N14 | M-020929- trafficking protei | 51399.00 TRAPPC4   | 2627.00 | 6.28  | 1.29  |
| 50058.00 N15 | M-010207- archaemetzincin    | 51321.00 AMZ2      | 4370.00 | 11.88 | 6.89  |
| 50058.00 N16 | M-020211- chromosome 19      | 51398.00 C19orf56  | 2353.00 | 13.81 | 8.82  |
| 50058.00 N17 | M-013325- WW domain con      | 51322.00 WAC       | 2335.00 | 9.94  | 4.95  |
| 50058.00 N18 | M-015756- COMM domain c      | 51397.00 COMM1D1C  | 2412.00 | 11.86 | 6.87  |
| 50058.00 N19 | M-013476- spastic paraplegi  | 51324.00 SPG21     | 3513.00 | 10.76 | 5.77  |
| 50058.00 N20 | M-020946- RWD domain cor     | 51389.00 RWDD1     | 3580.00 | 6.65  | 1.66  |
| 50058.00 N21 | M-020667- ADP-ribosylation   | 51326.00 ARL17P1   | 2420.00 | 3.35  | 1.64  |
| 50058.00 N23 | M-020729- erythroid associ   | 51327.00 ERAF      | 820.00  | 0.73  | 4.26  |
| 50058.00 O02 | M-020979- polymerase (RN/    | 51082.00 POLR1D    | 1603.00 | 4.55  | 0.44  |
| 50058.00 O04 | M-013580- mitochondrial rik  | 51081.00 MRPS7     | 912.00  | 2.74  | 2.25  |
| 50058.00 O05 | M-020947- hypothetical pro   | 51057.00 LOC51057  | 2746.00 | 13.00 | 8.01  |
| 50058.00 O06 | M-016921- NADH dehydroge     | 51079.00 NDUFA13   | 2412.00 | 5.22  | 0.23  |
| 50058.00 O07 | M-020950- zinc finger protei | 51058.00 ZNF691    | 2838.00 | 9.16  | 4.17  |
| 50058.00 O08 | M-021461- THAP domain co     | 51078.00 THAP4     | 2724.00 | 10.32 | 5.33  |
| 50058.00 O09 | M-020955- family with sequ   | 51059.00 FAM135B   | 1936.00 | 6.82  | 1.83  |
| 50058.00 O10 | M-020976- FCF1 small subur   | 51077.00 FCF1      | 1544.00 | 3.37  | 1.62  |
| 50058.00 O11 | M-009913- thioredoxin dom    | 51060.00 TXNDC12   | 2592.00 | 11.73 | 6.74  |
| 50058.00 O12 | M-020974- cutC copper tran   | 51076.00 CUTC      | 1615.00 | 4.64  | 0.35  |
| 50058.00 O13 | M-016755- thioredoxin dom    | 51061.00 TXNDC11   | 1942.00 | 5.25  | 0.26  |
| 50058.00 O14 | M-020968- thioredoxin dom    | 51075.00 TXNDC14   | 2216.00 | 15.52 | 10.53 |
| 50058.00 O15 | M-016818- family with sequ   | 51063.00 FAM26B    | 1878.00 | 7.08  | 2.09  |
| 50058.00 O16 | M-008475- APAF1 interactin   | 51074.00 APIP      | 2261.00 | 6.06  | 1.07  |
| 50058.00 O17 | M-020713- HSPC157 protein    | 29092.00 HSPC157   | 1650.00 | 1.52  | 3.47  |
| 50058.00 O18 | M-017470- mitochondrial rik  | 51073.00 MRPL4     | 1823.00 | 1.37  | 3.62  |
| 50058.00 O19 | M-020958- similar to hypotr  | 313156.00 RGD13107 | 3889.00 | 3.09  | 1.90  |
| 50058.00 O20 | M-016087- mediator of cell i | 51072.00 MEMO1     | 3421.00 | 4.97  | 0.02  |
| 50058.00 O21 | M-013709- formin homology    | 29109.00 FHOD1     | 3862.00 | 5.52  | 0.53  |
| 50058.00 O23 | M-020940- prolactin releasir | 51052.00 PRLH      | 1986.00 | 1.81  | 3.18  |
| 50058.00 P02 | M-020446- nuclear import 7   | 51388.00 NIP7      | 1173.00 | 3.75  | 1.24  |
| 50058.00 P04 | M-020949- eukaryotic transl  | 51386.00 EIF3S6IP  | 1558.00 | 8.67  | 3.68  |
| 50058.00 P05 | M-020903- spectrin, beta, n  | 51332.00 SPTBN5    | 1862.00 | 10.85 | 5.86  |
| 50058.00 P06 | M-013216- sorting nexin 7    | 51375.00 SNX7      | 1042.00 | 3.55  | 1.44  |
| 50058.00 P07 | M-006990- zinc finger protei | 51333.00 ZNF771    | 1155.00 | 6.67  | 1.68  |
| 50058.00 P08 | M-013215- mitochondrial rik  | 51373.00 MRPS17    | 1425.00 | 10.39 | 5.40  |
| 50058.00 P09 | M-020347- proline rich 16    | 51334.00 PRR16     | 1171.00 | 6.66  | 1.67  |

|              |                                         |          |           |         |       |       |
|--------------|-----------------------------------------|----------|-----------|---------|-------|-------|
| 50058.00 P10 | M-021053- coiled-coil doma              | 51372.00 | CCDC72    | 2247.00 | 16.73 | 11.74 |
| 50058.00 P11 | M-020257- neugrin, neurite              | 51335.00 | NGRN      | 545.00  | 2.39  | 2.60  |
| 50058.00 P12 | M-016844- proteasome mat                | 51371.00 | POMP      | 840.00  | 8.93  | 3.94  |
| 50058.00 P13 | M-017214- membrane-span                 | 51338.00 | MS4A4A    | 2047.00 | 9.97  | 4.98  |
| 50058.00 P14 | M-010662- testis expressed              | 51368.00 | TEX264    | 1736.00 | 5.30  | 0.31  |
| 50058.00 P15 | M-019013- crooked neck pr               | 51340.00 | CRNKL1    | 1541.00 | 12.98 | 7.99  |
| 50058.00 P16 | M-016449- processing of pr              | 51367.00 | POP5      | 2382.00 | 4.87  | 0.12  |
| 50058.00 P17 | M-020833- zinc finger protei            | 51351.00 | ZNF117    | 1461.00 | 1.92  | 3.07  |
| 50058.00 P18 | M-008411- phospholipase A               | 51365.00 | PLA1A     | 2330.00 | 4.89  | 0.10  |
| 50058.00 P19 | M-016845- hook homolog 1                | 51361.00 | HOOK1     | 3103.00 | 2.90  | 2.09  |
| 50058.00 P20 | M-021401- zinc finger, MYN              | 51364.00 | ZMYND10   | 2048.00 | 2.15  | 2.84  |
| 50058.00 P21 | M-013213- cell division cycle           | 51362.00 | CDC40     | 1659.00 | 3.13  | 1.86  |
| 50058.00 P23 | M-003960- B cell RAG associ             | 51363.00 | GALNAC4S  | 1203.00 | 2.66  | 2.33  |
|              |                                         |          |           | 2843.00 | 4.99  | 2.00  |
|              |                                         |          | MAD3      |         |       | 6.00  |
|              |                                         |          | MADc      |         |       | 2.96  |
| 50058.00 C22 |                                         |          |           | 3439.00 | 42.95 |       |
| 50058.00 D22 |                                         |          |           | 3985.00 | 35.38 |       |
| 50058.00 E22 |                                         |          |           | 3005.00 | 30.32 |       |
| 50058.00 F22 |                                         | 2151.00  | 18.13     |         |       |       |
|              |                                         |          | mn        | 3476.33 | 36.22 |       |
|              |                                         |          | sd        | 491.07  | 6.36  |       |
| 50058.00 G22 |                                         |          |           | 254.00  | 5.91  |       |
| 50058.00 H22 |                                         |          |           | 519.00  | 1.73  |       |
| 50058.00 I22 |                                         |          |           | 69.00   | 5.80  |       |
| 50058.00 J22 |                                         |          |           | 708.00  | 2.12  |       |
|              |                                         |          | mn        | 432.00  | 3.22  |       |
|              |                                         |          | sd        | 328.26  | 2.24  |       |
|              |                                         |          | 3psSD     |         | 19.07 |       |
|              |                                         |          | 3ngSD     |         | 6.73  |       |
|              |                                         |          | SumSD     |         | 25.80 |       |
|              |                                         |          | DiffMn    |         | 33.00 |       |
|              |                                         |          | SmovrDiff |         | 0.78  |       |
|              |                                         |          | 1minus    |         | 0.22  |       |
| 50058.00 G03 | M-003290- polo-like kinase :            | 5347.00  | PLK1 SMAF | 284.00  | 1.06  |       |
| 50058.00 H03 | M-003290- polo-like kinase :            | 5347.00  | PLK1 SMAF | 309.00  | 2.59  |       |
| 50058.00 I03 | D-001206- siControl non-targeting siRN. |          |           | 3506.00 | 6.93  |       |
| 50058.00 J03 | D-001206- siControl non-targeting siRN. |          |           | 2191.00 | 7.90  |       |
| 50058.00 K03 | D-001600- siGLO RISC-free siRNA         |          |           | 4274.00 | 20.61 |       |
| 50058.00 L03 | D-001600- siGLO RISC-free siRNA         |          |           | 2964.00 | 6.34  |       |



| rZ    | Cell Coun | % inf | Abs Dev | rZ    | Cell Count | % inf | Abs Dev | rZ     |
|-------|-----------|-------|---------|-------|------------|-------|---------|--------|
| -0.01 | 1871.00   | 0.96  | 1.00    | -0.62 | 1981.00    | 7.32  | 2.65    | 0.74   |
| 1.48  | 2339.00   | 1.75  | 0.21    | -0.13 | 1864.00    | 8.48  | 3.81    | 1.06   |
| 0.65  | 1725.00   | 2.84  | 0.88    | 0.55  | 1942.00    | 8.08  | 3.41    | 0.95   |
| -0.06 | 1208.00   | 1.16  | 0.80    | -0.50 | 1537.00    | 5.20  | 0.53    | 0.15   |
| -1.00 | 1010.00   | 2.97  | 1.01    | 0.63  | 1411.00    | 5.81  | 1.14    | 0.32   |
| 2.69  | 1078.00   | 5.66  | 3.70    | 2.31  | 2004.00    | 13.72 | 9.05    | 2.52 y |
| -0.31 | 2075.00   | 2.36  | 0.40    | 0.25  | 1834.00    | 5.07  | 0.40    | 0.11   |
| 1.95  | 2373.00   | 5.10  | 3.14    | 1.96  | 2197.00    | 9.56  | 4.89    | 1.36   |
| 3.69  | 1912.00   | 6.49  | 4.53    | 2.83  | 1797.00    | 12.30 | 7.63    | 2.12 y |
| 0.51  | 727.00    | 3.16  | 1.20    | 0.75  | 1789.00    | 15.60 | 10.93   | 3.04   |
| 2.53  | 1178.00   | 3.06  | 1.10    | 0.68  | 1963.00    | 9.22  | 4.55    | 1.27   |
| 0.41  | 733.00    | 3.00  | 1.04    | 0.65  | 1478.00    | 6.43  | 1.76    | 0.49   |
| 0.52  | 583.00    | 3.43  | 1.47    | 0.92  | 1247.00    | 5.85  | 1.18    | 0.33   |
| 0.86  | 1838.00   | 2.99  | 1.03    | 0.64  | 1553.00    | 8.56  | 3.89    | 1.08   |
| 0.93  | 2359.00   | 3.90  | 1.94    | 1.21  | 2097.00    | 5.20  | 0.53    | 0.15   |
| 2.54  | 1184.00   | 7.26  | 5.30    | 3.31  | 1413.00    | 10.05 | 5.38    | 1.50 x |
| 1.95  | 1123.00   | 5.43  | 3.47    | 2.17  | 2232.00    | 12.41 | 7.74    | 2.15 y |
| 3.41  | 801.00    | 13.36 | 11.40   | 7.12  | 1652.00    | 9.38  | 4.71    | 1.31 x |
| 3.24  | 867.00    | 4.61  | 2.65    | 1.66  | 1289.00    | 14.28 | 9.61    | 2.67 y |
| 1.68  | 1124.00   | 3.91  | 1.95    | 1.22  | 2335.00    | 6.98  | 2.31    | 0.64   |
| -0.75 | 1956.00   | 0.66  | 1.30    | -0.81 | 2158.00    | 4.12  | 0.55    | -0.15  |
| -0.23 | 904.00    | 0.55  | 1.41    | -0.88 | 1802.00    | 5.99  | 1.32    | 0.37   |
| 1.06  | 1513.00   | 0.53  | 1.43    | -0.89 | 2904.00    | 8.30  | 3.63    | 1.01   |
| -1.24 | 1927.00   | 0.42  | 1.54    | -0.96 | 1641.00    | 2.32  | 2.35    | -0.66  |
| -0.30 | 1132.00   | 0.09  | 1.87    | -1.17 | 1765.00    | 2.72  | 1.95    | -0.54  |
| 0.38  | 2357.00   | 0.42  | 1.54    | -0.96 | 4050.00    | 6.54  | 1.87    | 0.52   |
| 1.88  | 2654.00   | 0.98  | 0.98    | -0.61 | 3644.00    | 7.08  | 2.41    | 0.67   |
| 1.18  | 1233.00   | 0.57  | 1.39    | -0.87 | 2318.00    | 4.79  | 0.12    | 0.03   |
| 1.49  | 2007.00   | 1.05  | 0.91    | -0.57 | 2968.00    | 3.94  | 0.73    | -0.20  |
| -0.80 | 1870.00   | 0.64  | 1.32    | -0.82 | 2397.00    | 2.00  | 2.67    | -0.74  |
| -0.93 | 886.00    | 0.11  | 1.85    | -1.15 | 1017.00    | 1.87  | 2.80    | -0.78  |
| -0.05 | 2351.00   | 0.09  | 1.87    | -1.17 | 4756.00    | 4.23  | 0.44    | -0.12  |
| -0.57 | 1107.00   | 0.27  | 1.69    | -1.05 | 3210.00    | 0.81  | 3.86    | -1.08  |
| 0.02  | 2930.00   | 0.85  | 1.11    | -0.69 | 2013.00    | 0.75  | 3.92    | -1.09  |
| -0.47 | 2075.00   | 0.92  | 1.04    | -0.65 | 3159.00    | 4.72  | 0.05    | 0.01   |
| -0.66 | 3538.00   | 1.19  | 0.77    | -0.48 | 4415.00    | 2.42  | 2.25    | -0.63  |
| -0.40 | 2636.00   | 1.52  | 0.44    | -0.28 | 3260.00    | 2.98  | 1.69    | -0.47  |
| -0.70 | 1739.00   | 0.46  | 1.50    | -0.94 | 4154.00    | 3.25  | 1.42    | -0.40  |
| -0.49 | 4547.00   | 0.55  | 1.41    | -0.88 | 4960.00    | 4.98  | 0.31    | 0.09   |
| -0.78 | 1802.00   | 0.55  | 1.41    | -0.88 | 3138.00    | 3.35  | 1.32    | -0.37  |
| -0.81 | 1637.00   | 0.61  | 1.35    | -0.84 | 2852.00    | 1.93  | 2.74    | -0.76  |
| -0.75 | 1301.00   | 0.61  | 1.35    | -0.84 | 1776.00    | 1.80  | 2.87    | -0.80  |
| 0.06  | 2945.00   | 2.61  | 0.65    | 0.41  | 2567.00    | 2.92  | 1.75    | -0.49  |

|       |         |      |      |       |         |      |      |         |
|-------|---------|------|------|-------|---------|------|------|---------|
| 0.60  | 3222.00 | 2.39 | 0.43 | 0.27  | 4923.00 | 3.64 | 1.03 | -0.29   |
| 1.72  | 1897.00 | 0.79 | 1.17 | -0.73 | 5045.00 | 3.19 | 1.48 | -0.41   |
| -0.32 | 2038.00 | 0.39 | 1.57 | -0.98 | 3367.00 | 2.52 | 2.15 | -0.60   |
| 1.74  | 2350.00 | 3.91 | 1.95 | 1.22  | 3533.00 | 2.77 | 1.90 | -0.53   |
| -0.10 | 1809.00 | 2.82 | 0.86 | 0.54  | 2597.00 | 0.54 | 4.13 | -1.15   |
| 0.28  | 1693.00 | 0.59 | 1.37 | -0.85 | 4975.00 | 1.87 | 2.80 | -0.78   |
| 3.24  | 907.00  | 3.64 | 1.68 | 1.05  | 2411.00 | 4.40 | 0.27 | -0.08   |
| 1.67  | 2148.00 | 4.66 | 2.70 | 1.68  | 4549.00 | 2.62 | 2.05 | -0.57   |
| 0.49  | 1482.00 | 1.89 | 0.07 | -0.04 | 2924.00 | 4.41 | 0.26 | -0.07   |
| 1.06  | 1656.00 | 4.11 | 2.15 | 1.34  | 4771.00 | 3.48 | 1.19 | -0.33   |
| 0.50  | 2179.00 | 5.46 | 3.50 | 2.19  | 3452.00 | 1.30 | 3.37 | -0.94   |
| 1.32  | 1777.00 | 5.23 | 3.27 | 2.04  | 3545.00 | 3.27 | 1.40 | -0.39   |
| 1.14  | 1122.00 | 4.81 | 2.85 | 1.78  | 2832.00 | 2.22 | 2.45 | -0.68   |
| -0.72 | 1555.00 | 1.48 | 0.48 | -0.30 | 4044.00 | 2.57 | 2.10 | -0.58   |
| 5.49  | 1904.00 | 7.25 | 5.29 | 3.30  | 4396.00 | 6.39 | 1.72 | 0.48 y  |
| 2.05  | 1858.00 | 5.44 | 3.48 | 2.17  | 5081.00 | 6.20 | 1.53 | 0.43 y  |
| 0.56  | 2486.00 | 1.57 | 0.39 | -0.24 | 2850.00 | 1.89 | 2.78 | -0.77   |
| 0.34  | 3033.00 | 2.67 | 0.71 | 0.44  | 4998.00 | 4.64 | 0.03 | -0.01   |
| -0.41 | 1918.00 | 5.58 | 3.62 | 2.26  | 3977.00 | 3.85 | 0.82 | -0.23   |
| -1.01 | 3077.00 | 0.49 | 1.47 | -0.92 | 4041.00 | 1.29 | 3.38 | -0.94   |
| -0.63 | 2003.00 | 2.20 | 0.24 | 0.15  | 3241.00 | 1.36 | 3.31 | -0.92   |
| 0.38  | 2056.00 | 2.09 | 0.13 | 0.08  | 4572.00 | 3.39 | 1.28 | -0.36   |
| 0.16  | 2262.00 | 1.95 | 0.01 | -0.01 | 2950.00 | 0.31 | 4.36 | -1.22   |
| -0.03 | 2743.00 | 1.46 | 0.50 | -0.31 | 2627.00 | 0.30 | 4.37 | -1.22   |
| 0.74  | 2554.00 | 1.41 | 0.55 | -0.34 | 3674.00 | 1.77 | 2.90 | -0.81   |
| 2.67  | 1727.00 | 4.00 | 2.04 | 1.27  | 3092.00 | 3.91 | 0.76 | -0.21   |
| 0.89  | 2587.00 | 5.10 | 3.14 | 1.96  | 3113.00 | 2.47 | 2.20 | -0.61   |
| -1.30 | 966.00  | 1.55 | 0.41 | -0.25 | 622.00  | 0.80 | 3.87 | -1.08   |
| 0.30  | 2260.00 | 2.57 | 0.61 | 0.38  | 1901.00 | 1.89 | 2.78 | -0.77   |
| 0.29  | 3597.00 | 4.48 | 2.52 | 1.57  | 3604.00 | 1.11 | 3.56 | -0.99   |
| 0.11  | 2487.00 | 2.57 | 0.61 | 0.38  | 2485.00 | 1.45 | 3.22 | -0.90   |
| -1.19 | 2626.00 | 1.64 | 0.32 | -0.20 | 2272.00 | 0.40 | 4.27 | -1.19   |
| -0.13 | 4082.00 | 3.58 | 1.62 | 1.01  | 3981.00 | 1.93 | 2.74 | -0.76   |
| -0.47 | 3565.00 | 2.44 | 0.48 | 0.30  | 4294.00 | 1.37 | 3.30 | -0.92   |
| 3.38  | 2873.00 | 7.83 | 5.87 | 3.67  | 3381.00 | 3.82 | 0.85 | -0.24 y |
| 1.52  | 3309.00 | 4.17 | 2.21 | 1.38  | 3543.00 | 3.53 | 1.14 | -0.32   |
| 0.98  | 4337.00 | 8.37 | 6.41 | 4.00  | 3758.00 | 2.24 | 2.43 | -0.68   |
| -0.91 | 2446.00 | 0.70 | 1.26 | -0.79 | 3190.00 | 2.73 | 1.94 | -0.54   |
| 0.26  | 2312.00 | 2.77 | 0.81 | 0.50  | 2147.00 | 1.54 | 3.13 | -0.87   |
| 0.43  | 2736.00 | 1.06 | 0.90 | -0.56 | 2800.00 | 5.18 | 0.51 | 0.14    |
| 1.04  | 2570.00 | 2.26 | 0.30 | 0.19  | 4069.00 | 7.10 | 2.43 | 0.68    |
| 0.13  | 3335.00 | 3.78 | 1.82 | 1.14  | 3854.00 | 3.58 | 1.09 | -0.30   |
| -0.54 | 1501.00 | 2.93 | 0.97 | 0.61  | 2160.00 | 3.19 | 1.48 | -0.41   |
| 0.88  | 1645.00 | 3.65 | 1.69 | 1.05  | 2740.00 | 6.53 | 1.86 | 0.52    |

|       |         |       |       |       |         |       |       |         |
|-------|---------|-------|-------|-------|---------|-------|-------|---------|
| 0.40  | 1767.00 | 2.49  | 0.53  | 0.33  | 3371.00 | 5.67  | 1.00  | 0.28    |
| -0.13 | 1724.00 | 3.94  | 1.98  | 1.24  | 2669.00 | 3.52  | 1.15  | -0.32   |
| 0.55  | 1276.00 | 2.59  | 0.63  | 0.39  | 2215.00 | 2.93  | 1.74  | -0.48   |
| -0.25 | 2507.00 | 3.11  | 1.15  | 0.72  | 3072.00 | 3.58  | 1.09  | -0.30   |
| -0.28 | 1369.00 | 3.07  | 1.11  | 0.69  | 2410.00 | 3.40  | 1.27  | -0.35   |
| 4.56  | 1635.00 | 8.44  | 6.48  | 4.05  | 2628.00 | 7.08  | 2.41  | 0.67 y  |
| -0.48 | 1781.00 | 2.47  | 0.51  | 0.32  | 3281.00 | 3.14  | 1.53  | -0.43   |
| 1.71  | 1885.00 | 8.28  | 6.32  | 3.94  | 3884.00 | 6.44  | 1.77  | 0.49    |
| -0.44 | 800.00  | 6.63  | 4.67  | 2.91  | 3521.00 | 1.45  | 3.22  | -0.90   |
| -0.10 | 2509.00 | 6.74  | 4.78  | 2.98  | 4444.00 | 7.25  | 2.58  | 0.72    |
| 0.20  | 1827.00 | 3.67  | 1.71  | 1.07  | 3871.00 | 3.88  | 0.80  | -0.22   |
| 0.14  | 2220.00 | 5.09  | 3.13  | 1.95  | 3781.00 | 10.37 | 5.70  | 1.59    |
| -0.57 | 1945.00 | 3.55  | 1.59  | 0.99  | 3315.00 | 3.74  | 0.93  | -0.26   |
| 0.22  | 3633.00 | 2.39  | 0.43  | 0.27  | 2438.00 | 0.78  | 3.89  | -1.08   |
| 2.65  | 1664.00 | 9.44  | 7.48  | 4.67  | 1825.00 | 1.70  | 2.97  | -0.83 y |
| -0.51 | 1605.00 | 2.49  | 0.53  | 0.33  | 2091.00 | 1.05  | 3.62  | -1.01   |
| 3.07  | 629.00  | 2.38  | 0.42  | 0.27  | 1579.00 | 3.55  | 1.12  | -0.31   |
| -0.04 | 930.00  | 0.43  | 1.53  | -0.96 | 1666.00 | 0.42  | 4.25  | -1.18   |
| -0.51 | 459.00  | 1.09  | 0.87  | -0.54 | 955.00  | 0.10  | 4.57  | -1.27   |
| 0.51  | 1125.00 | 3.20  | 1.24  | 0.77  | 2079.00 | 2.41  | 2.27  | -0.63   |
| 0.32  | 1034.00 | 4.16  | 2.20  | 1.37  | 2811.00 | 3.17  | 1.50  | -0.42   |
| -0.03 | 1019.00 | 4.91  | 2.95  | 1.84  | 2189.00 | 2.19  | 2.48  | -0.69   |
| -1.02 | 1016.00 | 2.95  | 0.99  | 0.62  | 1297.00 | 0.23  | 4.44  | -1.24   |
| 0.57  | 1295.00 | 5.48  | 3.52  | 2.20  | 1691.00 | 1.54  | 3.13  | -0.87   |
| -0.41 | 1180.00 | 3.31  | 1.35  | 0.84  | 1562.00 | 1.47  | 3.20  | -0.89   |
| -0.64 | 931.00  | 3.22  | 1.26  | 0.79  | 1204.00 | 2.08  | 2.59  | -0.72   |
| -0.76 | 942.00  | 3.61  | 1.65  | 1.03  | 1867.00 | 0.54  | 4.13  | -1.15   |
| -0.56 | 1059.00 | 3.59  | 1.63  | 1.02  | 1853.00 | 2.75  | 1.92  | -0.53   |
| -1.22 | 1526.00 | 3.08  | 1.12  | 0.70  | 3959.00 | 2.90  | 1.77  | -0.49   |
| 0.34  | 1357.00 | 11.50 | 9.54  | 5.95  | 3121.00 | 10.19 | 5.52  | 1.54    |
| -0.68 | 1392.00 | 7.47  | 5.51  | 3.44  | 2447.00 | 6.82  | 2.15  | 0.60    |
| 0.64  | 1527.00 | 18.34 | 16.38 | 10.23 | 3823.00 | 21.63 | 16.96 | 4.72 y  |
| -1.39 | 2080.00 | 7.21  | 5.25  | 3.28  | 2289.00 | 4.24  | 0.43  | -0.12   |
| -1.22 | 3849.00 | 0.88  | 1.08  | -0.67 | 3244.00 | 5.64  | 0.97  | 0.27    |
| -0.58 | 2553.00 | 1.14  | 0.82  | -0.51 | 2991.00 | 9.43  | 4.76  | 1.32    |
| -0.01 | 3707.00 | 1.97  | 0.01  | 0.01  | 3151.00 | 5.87  | 1.20  | 0.33    |
| -0.02 | 3258.00 | 1.17  | 0.79  | -0.50 | 2928.00 | 6.15  | 1.48  | 0.41    |
| -0.68 | 2644.00 | 0.61  | 1.35  | -0.85 | 3345.00 | 7.12  | 2.45  | 0.68    |
| -0.57 | 1253.00 | 0.48  | 1.48  | -0.92 | 3082.00 | 17.46 | 12.79 | 3.56    |
| 0.19  | 2396.00 | 2.25  | 0.29  | 0.18  | 3216.00 | 10.04 | 5.37  | 1.50    |
| -1.26 | 1527.00 | 0.39  | 1.57  | -0.98 | 3474.00 | 3.14  | 1.53  | -0.43   |
| -0.58 | 2266.00 | 1.24  | 0.72  | -0.45 | 2973.00 | 8.31  | 3.64  | 1.01    |
| -0.20 | 2082.00 | 0.58  | 1.38  | -0.86 | 3378.00 | 7.19  | 2.52  | 0.70    |
| -0.54 | 3212.00 | 0.78  | 1.18  | -0.74 | 2886.00 | 4.75  | 0.08  | 0.02    |

|       |         |      |      |       |         |       |      |       |
|-------|---------|------|------|-------|---------|-------|------|-------|
| -0.76 | 1810.00 | 1.05 | 0.91 | -0.57 | 1967.00 | 3.56  | 1.11 | -0.31 |
| -0.32 | 3714.00 | 2.77 | 0.81 | 0.51  | 4380.00 | 8.13  | 3.46 | 0.96  |
| -0.83 | 2189.00 | 1.51 | 0.45 | -0.28 | 3892.00 | 7.09  | 2.42 | 0.67  |
| 0.18  | 1466.00 | 2.80 | 0.84 | 0.52  | 1968.00 | 11.43 | 6.76 | 1.88  |
| 0.19  | 2153.00 | 2.23 | 0.27 | 0.17  | 4600.00 | 6.93  | 2.26 | 0.63  |
| -0.58 | 2509.00 | 2.27 | 0.31 | 0.19  | 3284.00 | 2.86  | 1.81 | -0.50 |
| -0.67 | 3442.00 | 1.10 | 0.86 | -0.53 | 3658.00 | 4.70  | 0.03 | 0.01  |
| -0.64 | 2674.00 | 3.07 | 1.11 | 0.69  | 5149.00 | 6.41  | 1.74 | 0.48  |
| -1.11 | 1434.00 | 1.19 | 0.77 | -0.48 | 3756.00 | 3.91  | 0.76 | -0.21 |
| -1.28 | 2800.00 | 1.29 | 0.67 | -0.42 | 2729.00 | 13.56 | 8.89 | 2.47  |
| -1.20 | 2321.00 | 0.47 | 1.49 | -0.93 | 2141.00 | 4.25  | 0.42 | -0.12 |
| -1.30 | 1476.00 | 0.47 | 1.49 | -0.93 | 1299.00 | 6.70  | 2.03 | 0.56  |
| -1.48 | 1393.00 | 0.65 | 1.31 | -0.82 | 1868.00 | 5.94  | 1.27 | 0.35  |
| 0.15  | 1441.00 | 1.11 | 0.85 | -0.53 | 1414.00 | 8.56  | 3.89 | 1.08  |
| -1.19 | 1741.00 | 0.40 | 1.56 | -0.97 | 2376.00 | 4.84  | 0.17 | 0.05  |
| -0.15 | 2944.00 | 0.82 | 1.14 | -0.71 | 3017.00 | 4.11  | 0.56 | -0.16 |
| -1.39 | 1542.00 | 0.97 | 0.99 | -0.62 | 1525.00 | 3.41  | 1.26 | -0.35 |
| 0.91  | 3456.00 | 1.79 | 0.17 | -0.10 | 2800.00 | 8.57  | 3.90 | 1.09  |
| -1.17 | 1771.00 | 0.45 | 1.51 | -0.94 | 1324.00 | 3.02  | 1.65 | -0.46 |
| -0.19 | 2522.00 | 1.39 | 0.57 | -0.36 | 2113.00 | 4.59  | 0.08 | -0.02 |
| 1.75  | 941.00  | 1.28 | 0.68 | -0.43 | 1948.00 | 9.03  | 4.36 | 1.21  |
| -0.65 | 1919.00 | 0.36 | 1.60 | -1.00 | 3230.00 | 4.18  | 0.49 | -0.14 |
| 0.38  | 2450.00 | 0.45 | 1.51 | -0.94 | 2333.00 | 2.14  | 2.53 | -0.70 |
| -0.15 | 2740.00 | 1.24 | 0.72 | -0.45 | 1946.00 | 2.31  | 2.36 | -0.66 |
| 3.01  | 2900.00 | 1.31 | 0.65 | -0.41 | 4212.00 | 6.29  | 1.62 | 0.45  |
| 4.07  | 4136.00 | 3.24 | 1.28 | 0.80  | 3710.00 | 5.85  | 1.18 | 0.33  |
| -0.04 | 1766.00 | 0.62 | 1.34 | -0.83 | 2176.00 | 0.46  | 4.21 | -1.17 |
| -0.15 | 3062.00 | 0.36 | 1.60 | -1.00 | 3858.00 | 1.97  | 2.70 | -0.75 |
| -0.33 | 2691.00 | 0.37 | 1.59 | -0.99 | 4231.00 | 1.28  | 3.39 | -0.95 |
| -0.36 | 2400.00 | 1.46 | 0.50 | -0.31 | 2218.00 | 3.43  | 1.24 | -0.35 |
| 0.84  | 1193.00 | 2.43 | 0.47 | 0.29  | 1830.00 | 1.97  | 2.70 | -0.75 |
| 0.05  | 2088.00 | 1.44 | 0.52 | -0.33 | 3429.00 | 1.72  | 2.95 | -0.82 |
| 0.38  | 1890.00 | 5.40 | 3.44 | 2.15  | 1951.00 | 1.44  | 3.23 | -0.90 |
| 0.97  | 2889.00 | 1.83 | 0.13 | -0.08 | 2624.00 | 2.17  | 2.50 | -0.70 |
| -0.17 | 1096.00 | 0.64 | 1.32 | -0.82 | 1011.00 | 3.07  | 1.60 | -0.45 |
| 0.75  | 1520.00 | 0.53 | 1.43 | -0.90 | 2337.00 | 2.10  | 2.57 | -0.72 |
| 0.90  | 2824.00 | 1.59 | 0.37 | -0.23 | 2918.00 | 2.23  | 2.44 | -0.68 |
| 1.34  | 2420.00 | 1.82 | 0.14 | -0.09 | 3795.00 | 1.42  | 3.25 | -0.90 |
| -0.67 | 1130.00 | 2.48 | 0.52 | 0.32  | 1391.00 | 0.93  | 3.74 | -1.04 |
| -0.48 | 828.00  | 1.09 | 0.87 | -0.55 | 515.00  | 0.78  | 3.89 | -1.08 |
| 0.86  | 1705.00 | 1.11 | 0.85 | -0.53 | 1781.00 | 1.74  | 2.93 | -0.82 |
| -0.04 | 2891.00 | 1.87 | 0.09 | -0.06 | 3499.00 | 6.72  | 2.05 | 0.57  |
| 1.46  | 2024.00 | 2.87 | 0.91 | 0.57  | 2363.00 | 2.45  | 2.22 | -0.62 |
| 0.06  | 2533.00 | 1.26 | 0.70 | -0.43 | 3050.00 | 3.38  | 1.29 | -0.36 |

|       |         |       |       |       |         |       |       |        |
|-------|---------|-------|-------|-------|---------|-------|-------|--------|
| 1.90  | 2585.00 | 0.81  | 1.15  | -0.72 | 2991.00 | 1.81  | 2.86  | -0.80  |
| -0.19 | 2136.00 | 0.98  | 0.98  | -0.61 | 2847.00 | 1.97  | 2.70  | -0.75  |
| -0.14 | 3167.00 | 0.98  | 0.98  | -0.61 | 3699.00 | 3.22  | 1.45  | -0.41  |
| -1.10 | 2357.00 | 0.72  | 1.24  | -0.77 | 2758.00 | 5.48  | 0.81  | 0.22   |
| -1.55 | 2175.00 | 0.28  | 1.68  | -1.05 | 3162.00 | 1.49  | 3.18  | -0.89  |
| -0.80 | 3113.00 | 5.17  | 3.21  | 2.01  | 5634.00 | 4.72  | 0.05  | 0.01   |
| -0.90 | 1543.00 | 2.33  | 0.37  | 0.23  | 2227.00 | 3.19  | 1.48  | -0.41  |
| -0.27 | 2488.00 | 4.10  | 2.14  | 1.34  | 2982.00 | 3.22  | 1.45  | -0.40  |
| 0.53  | 1901.00 | 2.95  | 0.99  | 0.62  | 1894.00 | 3.01  | 1.66  | -0.46  |
| -0.87 | 1931.00 | 2.18  | 0.22  | 0.13  | 2345.00 | 1.58  | 3.09  | -0.86  |
| 3.82  | 1727.00 | 16.10 | 14.14 | 8.83  | 1766.00 | 7.98  | 3.31  | 0.92 y |
| 0.37  | 3009.00 | 7.71  | 5.75  | 3.59  | 2666.00 | 4.50  | 0.17  | -0.05  |
| -0.23 | 1963.00 | 2.75  | 0.79  | 0.49  | 1894.00 | 1.11  | 3.56  | -0.99  |
| -0.08 | 1826.00 | 1.59  | 0.37  | -0.23 | 1836.00 | 1.47  | 3.20  | -0.89  |
| -0.58 | 1688.00 | 3.26  | 1.30  | 0.81  | 2252.00 | 1.02  | 3.65  | -1.02  |
| 0.40  | 2277.00 | 7.38  | 5.42  | 3.38  | 2132.00 | 5.49  | 0.82  | 0.23   |
| 0.52  | 1415.00 | 3.82  | 1.86  | 1.16  | 2326.00 | 4.64  | 0.03  | -0.01  |
| -0.63 | 629.00  | 6.20  | 4.24  | 2.65  | 923.00  | 1.73  | 2.94  | -0.82  |
| -0.81 | 2743.00 | 3.97  | 2.01  | 1.26  | 2939.00 | 2.89  | 1.78  | -0.50  |
| 0.69  | 1632.00 | 1.29  | 0.67  | -0.42 | 1937.00 | 5.27  | 0.60  | 0.17   |
| -0.09 | 2376.00 | 3.45  | 1.49  | 0.93  | 2614.00 | 3.75  | 0.92  | -0.26  |
| 0.38  | 2102.00 | 2.66  | 0.70  | 0.44  | 2740.00 | 8.87  | 4.20  | 1.17   |
| 1.60  | 2244.00 | 2.58  | 0.62  | 0.39  | 2592.00 | 4.32  | 0.35  | -0.10  |
| -0.21 | 1330.00 | 2.03  | 0.07  | 0.04  | 3109.00 | 2.80  | 1.87  | -0.52  |
| 0.22  | 2658.00 | 4.29  | 2.33  | 1.45  | 2889.00 | 7.23  | 2.56  | 0.71   |
| -0.65 | 2578.00 | 1.12  | 0.84  | -0.52 | 3560.00 | 14.33 | 9.66  | 2.69   |
| 1.24  | 1153.00 | 1.73  | 0.23  | -0.14 | 1336.00 | 10.11 | 5.44  | 1.51   |
| -0.24 | 2567.00 | 0.35  | 1.61  | -1.00 | 3003.00 | 10.19 | 5.52  | 1.54   |
| 1.81  | 2463.00 | 2.72  | 0.76  | 0.47  | 1757.00 | 13.89 | 9.22  | 2.57   |
| 0.20  | 1742.00 | 1.84  | 0.12  | -0.08 | 2480.00 | 12.98 | 8.31  | 2.31   |
| 2.17  | 2505.00 | 2.52  | 0.56  | 0.35  | 2369.00 | 18.83 | 14.16 | 3.94 y |
| 0.70  | 2372.00 | 0.97  | 0.99  | -0.62 | 2654.00 | 12.74 | 8.07  | 2.24   |
| 1.73  | 2878.00 | 3.30  | 1.34  | 0.84  | 2390.00 | 16.03 | 11.36 | 3.16   |
| 1.33  | 1580.00 | 0.76  | 1.20  | -0.75 | 2743.00 | 20.16 | 15.49 | 4.31   |
| -0.72 | 1600.00 | 0.69  | 1.27  | -0.79 | 1688.00 | 7.11  | 2.44  | 0.68   |
| 2.77  | 2658.00 | 6.81  | 4.85  | 3.03  | 2312.00 | 20.59 | 15.92 | 4.43 y |
| -1.01 | 967.00  | 0.93  | 1.03  | -0.64 | 1031.00 | 7.47  | 2.80  | 0.78   |
| -0.86 | 1095.00 | 2.28  | 0.32  | 0.20  | 2137.00 | 7.96  | 3.29  | 0.91   |
| -0.18 | 2562.00 | 2.07  | 0.11  | 0.07  | 1151.00 | 10.08 | 5.41  | 1.50   |
| -0.20 | 1841.00 | 1.14  | 0.82  | -0.51 | 1692.00 | 14.24 | 9.57  | 2.66   |
| 0.79  | 1966.00 | 2.03  | 0.07  | 0.05  | 2843.00 | 15.48 | 10.81 | 3.01   |
| 0.96  | 2245.00 | 3.79  | 1.83  | 1.14  | 1971.00 | 15.37 | 10.70 | 2.98   |
| 2.35  | 2121.00 | 3.35  | 1.39  | 0.87  | 2496.00 | 20.31 | 15.64 | 4.35 x |
| 0.92  | 1726.00 | 2.32  | 0.36  | 0.22  | 1473.00 | 15.82 | 11.15 | 3.10   |

|       |         |      |      |       |         |       |      |        |
|-------|---------|------|------|-------|---------|-------|------|--------|
| -0.18 | 1202.00 | 1.25 | 0.71 | -0.44 | 1437.00 | 11.83 | 7.16 | 1.99   |
| -0.17 | 3629.00 | 2.89 | 0.93 | 0.58  | 5073.00 | 5.95  | 1.28 | 0.36   |
| 0.29  | 2955.00 | 3.93 | 1.97 | 1.23  | 3694.00 | 6.93  | 2.26 | 0.63   |
| 1.69  | 2326.00 | 1.46 | 0.50 | -0.31 | 2132.00 | 7.83  | 3.16 | 0.88   |
| -0.12 | 2655.00 | 0.68 | 1.28 | -0.80 | 3303.00 | 6.60  | 1.93 | 0.54   |
| 1.09  | 1778.00 | 1.46 | 0.50 | -0.31 | 1811.00 | 3.48  | 1.19 | -0.33  |
| -0.20 | 1736.00 | 1.67 | 0.29 | -0.18 | 2793.00 | 2.76  | 1.91 | -0.53  |
| -0.02 | 1068.00 | 1.59 | 0.37 | -0.23 | 1251.00 | 4.00  | 0.67 | -0.19  |
| -0.85 | 1138.00 | 1.85 | 0.11 | -0.07 | 3362.00 | 2.97  | 1.70 | -0.47  |
| 0.17  | 685.00  | 2.48 | 0.52 | 0.33  | 1805.00 | 5.71  | 1.04 | 0.29   |
| -0.15 | 569.00  | 1.58 | 0.38 | -0.24 | 2309.00 | 3.55  | 1.12 | -0.31  |
| 1.25  | 1222.00 | 1.96 | 0.00 | 0.00  | 1743.00 | 4.13  | 0.54 | -0.15  |
| 0.25  | 1015.00 | 2.17 | 0.21 | 0.13  | 1607.00 | 1.87  | 2.80 | -0.78  |
| 0.14  | 1422.00 | 1.48 | 0.48 | -0.30 | 2157.00 | 3.15  | 1.52 | -0.42  |
| 0.85  | 1486.00 | 1.82 | 0.14 | -0.09 | 2313.00 | 1.86  | 2.81 | -0.78  |
| 2.14  | 2275.00 | 4.40 | 2.44 | 1.52  | 3763.00 | 7.76  | 3.09 | 0.86   |
| 1.71  | 2250.00 | 1.96 | 0.00 | 0.00  | 3847.00 | 1.98  | 2.69 | -0.75  |
| 1.33  | 1855.00 | 1.78 | 0.18 | -0.11 | 2770.00 | 3.68  | 0.99 | -0.28  |
| -0.67 | 1678.00 | 2.86 | 0.90 | 0.56  | 4491.00 | 2.63  | 2.04 | -0.57  |
| 0.13  | 1510.00 | 0.66 | 1.30 | -0.81 | 2064.00 | 1.60  | 3.07 | -0.86  |
| -0.75 | 964.00  | 1.66 | 0.30 | -0.19 | 1835.00 | 0.65  | 4.02 | -1.12  |
| 0.01  | 1266.00 | 0.71 | 1.25 | -0.78 | 2632.00 | 1.41  | 3.26 | -0.91  |
| -0.93 | 1478.00 | 1.89 | 0.07 | -0.04 | 1284.00 | 0.55  | 4.12 | -1.15  |
| -1.07 | 1874.00 | 1.33 | 0.63 | -0.39 | 1726.00 | 3.07  | 1.60 | -0.45  |
| -0.39 | 2638.00 | 1.71 | 0.25 | -0.16 | 2422.00 | 3.72  | 0.95 | -0.27  |
| 0.83  | 3208.00 | 4.77 | 2.81 | 1.75  | 3298.00 | 2.52  | 2.15 | -0.60  |
| -0.16 | 2021.00 | 5.64 | 3.68 | 2.30  | 2581.00 | 6.08  | 1.41 | 0.39   |
| -0.18 | 2300.00 | 3.22 | 1.26 | 0.79  | 3521.00 | 5.06  | 0.39 | 0.11   |
| 0.12  | 1491.00 | 4.36 | 2.40 | 1.50  | 1986.00 | 4.78  | 0.11 | 0.03   |
| -0.90 | 2285.00 | 4.73 | 2.77 | 1.73  | 2302.00 | 2.74  | 1.93 | -0.54  |
| -1.24 | 1774.00 | 3.33 | 1.37 | 0.85  | 2280.00 | 6.36  | 1.69 | 0.47   |
| -1.01 | 1637.00 | 2.81 | 0.85 | 0.53  | 2703.00 | 6.84  | 2.17 | 0.60   |
| -0.78 | 1435.00 | 3.34 | 1.38 | 0.86  | 1643.00 | 7.30  | 2.63 | 0.73   |
| -0.58 | 1902.00 | 2.47 | 0.51 | 0.32  | 1312.00 | 1.45  | 3.22 | -0.90  |
| -0.93 | 1713.00 | 1.81 | 0.15 | -0.09 | 2628.00 | 2.02  | 2.65 | -0.74  |
| -1.34 | 1096.00 | 1.37 | 0.59 | -0.37 | 2219.00 | 3.65  | 1.02 | -0.28  |
| -1.09 | 1684.00 | 3.15 | 1.19 | 0.74  | 1397.00 | 4.01  | 0.66 | -0.18  |
| -0.37 | 2559.00 | 5.35 | 3.39 | 2.12  | 3268.00 | 9.00  | 4.33 | 1.20   |
| -0.76 | 3083.00 | 2.34 | 0.38 | 0.23  | 3915.00 | 5.95  | 1.28 | 0.36   |
| -0.67 | 2384.00 | 2.27 | 0.31 | 0.19  | 3069.00 | 6.68  | 2.01 | 0.56   |
| -1.38 | 1037.00 | 2.41 | 0.45 | 0.28  | 1439.00 | 4.86  | 0.19 | 0.05   |
| 0.28  | 1548.00 | 0.84 | 1.12 | -0.70 | 4446.00 | 4.14  | 0.53 | -0.15  |
| -0.68 | 1660.00 | 1.33 | 0.63 | -0.40 | 1869.00 | 3.37  | 1.30 | -0.36  |
| 3.91  | 3022.00 | 4.27 | 2.31 | 1.44  | 4317.00 | 12.88 | 8.21 | 2.28 y |

|       |         |      |      |       |         |       |       |        |
|-------|---------|------|------|-------|---------|-------|-------|--------|
| -0.38 | 2031.00 | 0.49 | 1.47 | -0.92 | 1706.00 | 4.04  | 0.63  | -0.17  |
| 2.11  | 998.00  | 1.60 | 0.36 | -0.22 | 2002.00 | 5.39  | 0.72  | 0.20   |
| 1.81  | 1437.00 | 0.63 | 1.33 | -0.83 | 3024.00 | 5.42  | 0.75  | 0.21   |
| 2.32  | 1216.00 | 2.47 | 0.51 | 0.32  | 1765.00 | 5.61  | 0.94  | 0.26   |
| -0.35 | 1409.00 | 0.71 | 1.25 | -0.78 | 2274.00 | 5.85  | 1.18  | 0.33   |
| 5.07  | 1251.00 | 0.96 | 1.00 | -0.62 | 3462.00 | 13.58 | 8.91  | 2.48 y |
| 4.50  | 1920.00 | 2.76 | 0.80 | 0.50  | 2996.00 | 16.52 | 11.85 | 3.30 y |
| 0.87  | 836.00  | 0.12 | 1.84 | -1.15 | 2886.00 | 6.31  | 1.64  | 0.45   |
| 0.43  | 1499.00 | 0.27 | 1.69 | -1.06 | 4117.00 | 14.57 | 9.90  | 2.76   |
| 2.33  | 1965.00 | 1.12 | 0.84 | -0.52 | 4413.00 | 21.39 | 16.72 | 4.65 x |
| 2.98  | 1687.00 | 1.72 | 0.24 | -0.15 | 4196.00 | 31.65 | 26.98 | 7.51 y |
| 1.67  | 1906.00 | 2.94 | 0.98 | 0.61  | 1607.00 | 12.07 | 7.40  | 2.06   |
| 2.32  | 2103.00 | 2.23 | 0.27 | 0.17  | 1956.00 | 11.91 | 7.24  | 2.02   |
| 1.95  | 2150.00 | 0.65 | 1.31 | -0.82 | 2607.00 | 21.17 | 16.50 | 4.59   |
| 0.56  | 2285.00 | 0.61 | 1.35 | -0.84 | 2289.00 | 11.01 | 6.34  | 1.76   |
| -0.56 | 745.00  | 0.13 | 1.83 | -1.14 | 1667.00 | 12.78 | 8.11  | 2.26   |
| -1.44 | 363.00  | 0.28 | 1.68 | -1.05 | 588.00  | 15.31 | 10.64 | 2.96   |
| -0.15 | 2151.00 | 1.72 | 0.24 | -0.15 | 2012.00 | 3.73  | 0.94  | -0.26  |
| -0.76 | 1932.00 | 1.55 | 0.41 | -0.25 | 1117.00 | 6.09  | 1.42  | 0.39   |
| 2.71  | 3740.00 | 5.72 | 3.76 | 2.35  | 1634.00 | 6.43  | 1.76  | 0.49 y |
| 0.08  | 2504.00 | 1.00 | 0.96 | -0.60 | 2358.00 | 4.20  | 0.47  | -0.13  |
| 1.41  | 1513.00 | 1.72 | 0.24 | -0.15 | 2646.00 | 6.24  | 1.57  | 0.44   |
| 1.80  | 1291.00 | 1.16 | 0.80 | -0.50 | 2419.00 | 7.98  | 3.31  | 0.92   |
| 0.62  | 1921.00 | 0.57 | 1.39 | -0.87 | 1307.00 | 8.11  | 3.44  | 0.96   |
| -0.55 | 1376.00 | 0.58 | 1.38 | -0.86 | 1133.00 | 7.94  | 3.27  | 0.91   |
| 2.28  | 1574.00 | 0.51 | 1.45 | -0.91 | 2100.00 | 4.76  | 0.09  | 0.02   |
| -0.12 | 1514.00 | 0.73 | 1.23 | -0.77 | 2927.00 | 8.51  | 3.84  | 1.07   |
| 0.09  | 1813.00 | 2.81 | 0.85 | 0.53  | 1984.00 | 5.09  | 0.42  | 0.12   |
| 3.56  | 1906.00 | 1.68 | 0.28 | -0.18 | 3522.00 | 17.55 | 12.88 | 3.58 y |
| 0.71  | 2027.00 | 1.53 | 0.43 | -0.27 | 3681.00 | 9.02  | 4.35  | 1.21   |
| 0.36  | 2083.00 | 2.26 | 0.30 | 0.19  | 2628.00 | 6.66  | 1.99  | 0.55   |
| -1.18 | 1277.00 | 0.47 | 1.49 | -0.93 | 1600.00 | 5.19  | 0.52  | 0.14   |
| -1.22 | 1765.00 | 0.91 | 1.05 | -0.66 | 1350.00 | 5.04  | 0.37  | 0.10   |
| -0.65 | 2267.00 | 1.01 | 0.95 | -0.59 | 2604.00 | 3.11  | 1.56  | -0.43  |
| -0.01 | 1949.00 | 2.26 | 0.30 | 0.19  | 2131.00 | 6.80  | 2.13  | 0.59   |
| 0.18  | 2092.00 | 0.91 | 1.05 | -0.66 | 3147.00 | 4.99  | 0.32  | 0.09   |
| -1.08 | 957.00  | 1.25 | 0.71 | -0.44 | 1525.00 | 5.57  | 0.90  | 0.25   |
| -0.42 | 538.00  | 6.88 | 4.92 | 3.07  | 1331.00 | 2.18  | 2.49  | -0.69  |
| 1.24  | 1283.00 | 4.29 | 2.33 | 1.45  | 1974.00 | 7.29  | 2.62  | 0.73   |
| 1.98  | 1307.00 | 4.13 | 2.17 | 1.36  | 3420.00 | 4.30  | 0.37  | -0.10  |
| -0.49 | 1221.00 | 4.10 | 2.14 | 1.33  | 1552.00 | 6.06  | 1.39  | 0.39   |
| 0.57  | 777.00  | 0.90 | 1.06 | -0.66 | 2848.00 | 7.20  | 2.53  | 0.70   |
| 1.82  | 985.00  | 2.54 | 0.58 | 0.36  | 2196.00 | 7.42  | 2.75  | 0.77   |
| 0.56  | 884.00  | 2.49 | 0.53 | 0.33  | 1558.00 | 3.15  | 1.52  | -0.43  |

|         |         |      |         |       |         |       |       |        |
|---------|---------|------|---------|-------|---------|-------|-------|--------|
| 3.97    | 2231.00 | 2.06 | 0.10    | 0.06  | 3586.00 | 11.52 | 6.85  | 1.91   |
| -0.88   | 1340.00 | 0.82 | 1.14    | -0.71 | 3201.00 | 7.09  | 2.42  | 0.67   |
| 1.33    | 1089.00 | 1.84 | 0.12    | -0.08 | 1147.00 | 16.39 | 11.72 | 3.26   |
| 1.68    | 1719.00 | 0.87 | 1.09    | -0.68 | 3538.00 | 10.77 | 6.10  | 1.70   |
| 0.10    | 2283.00 | 3.02 | 1.06    | 0.66  | 2018.00 | 12.34 | 7.67  | 2.13   |
| 2.70    | 1292.00 | 4.80 | 2.84    | 1.77  | 2132.00 | 15.95 | 11.28 | 3.14 y |
| -0.04   | 3094.00 | 0.90 | 1.06    | -0.66 | 2812.00 | 7.79  | 3.12  | 0.87   |
| -1.04   | 2336.00 | 1.97 | 0.01    | 0.01  | 1884.00 | 8.97  | 4.30  | 1.20   |
| -0.03   | 2148.00 | 1.68 | 0.28    | -0.18 | 1432.00 | 8.59  | 3.92  | 1.09   |
| -0.71   | 4009.00 | 4.81 | 2.85    | 1.78  | 2633.00 | 19.22 | 14.55 | 4.05   |
| -0.96   | 1905.00 | 1.47 | 0.49    | -0.31 | 2359.00 | 16.02 | 11.35 | 3.16   |
| -0.63   | 2031.00 | 0.89 | 1.07    | -0.67 | 1055.00 | 11.19 | 6.52  | 1.81   |
| -0.79   | 1587.00 | 0.76 | 1.20    | -0.75 | 855.00  | 13.57 | 8.90  | 2.48   |
|         | 1887.50 | 1.96 | 1.08    |       | 2490.50 | 4.67  | 2.43  |        |
|         |         |      | 3.25    |       |         |       | 7.28  |        |
|         |         |      | 1.60    |       |         |       | 3.59  |        |
| 1489.00 | 33.98   |      | 2622.00 |       | 31.27   |       |       |        |
| 3231.00 | 37.08   |      | 2478.00 |       | 21.27   |       |       |        |
| 1827.00 | 30.98   |      | 3189.00 |       | 48.42   |       |       |        |
| 1736.00 | 39.80   |      | 2785.00 |       | 46.79   |       |       |        |
| 2070.75 | 35.46   |      | 2768.50 |       | 36.94   |       |       |        |
| 786.57  | 3.82    |      | 307.11  |       | 12.99   |       |       |        |
| 167.00  | 2.99    |      | 509.00  |       | 1.57    |       |       |        |
| 588.00  | 0.85    |      | 429.00  |       | 0.93    |       |       |        |
| 178.00  | 2.25    |      | 307.00  |       | 2.28    |       |       |        |
| 545.00  | 4.59    |      | 512.00  |       | 0.98    |       |       |        |
| 437.00  | 2.56    |      | 416.00  |       | 1.40    |       |       |        |
| 225.33  | 1.89    |      | 103.12  |       | 0.77    |       |       |        |
|         | 11.46   |      |         |       | 38.98   |       |       |        |
|         | 5.66    |      |         |       | 2.30    |       |       |        |
|         | 17.12   |      |         |       | 41.27   |       |       |        |
|         | 32.90   |      |         |       | 35.54   |       |       |        |
|         | 0.52    |      |         |       | 1.16    |       |       |        |
|         | 0.48    |      |         |       | -0.16   |       |       |        |
| 174.00  | 2.30    |      | 194.00  |       | 5.15    |       |       |        |
| 215.00  | 0.47    |      | 284.00  |       | 15.49   |       |       |        |
| 1864.00 | 2.47    |      | 2071.00 |       | 1.59    |       |       |        |
| 1790.00 | 7.43    |      | 2584.00 |       | 5.92    |       |       |        |
| 3245.00 | 1.94    |      | 4899.00 |       | 25.19   |       |       |        |
| 4162.00 | 6.32    |      | 5638.00 |       | 11.90   |       |       |        |



debris a,b

debris a,b







debris a



debris a

| Plate    | Well | Gene                   | GeneID   | Cell Coun % inf | Abs Dev | rZ    |      |       |
|----------|------|------------------------|----------|-----------------|---------|-------|------|-------|
| 50059.00 | A02  | M-013768- coiled-coil  | 54482.00 | CCDC76          | 2509.00 | 2.35  | 2.68 | -0.57 |
| 50059.00 | A04  | M-025373- chondroitin  | 54480.00 | CSG1cA-T        | 3020.00 | 6.46  | 1.43 | 0.31  |
| 50059.00 | A05  | M-017972- family with  | 51571.00 | FAM49B          | 1350.00 | 2.22  | 2.81 | -0.60 |
| 50059.00 | A06  | M-016930- toll interac | 54472.00 | TOLLIP          | 1060.00 | 1.42  | 3.61 | -0.77 |
| 50059.00 | A07  | M-009233- membrane     | 51573.00 | MIR16           | 2616.00 | 1.80  | 3.23 | -0.69 |
| 50059.00 | A08  | M-015938- Smith-Mag    | 54471.00 | SMCR7L          | 1994.00 | 3.16  | 1.87 | -0.40 |
| 50059.00 | A09  | M-020996- La ribonucl  | 51574.00 | LARP7           | 2794.00 | 2.29  | 2.74 | -0.58 |
| 50059.00 | A10  | M-013756- armadillo r  | 54470.00 | ARMCX6          | 3996.00 | 6.46  | 1.43 | 0.31  |
| 50059.00 | A11  | M-015235- ESF1, nucle  | 51575.00 | ESF1            | 2967.00 | 5.19  | 0.16 | 0.04  |
| 50059.00 | A12  | M-009477- zinc finger, | 54469.00 | ZFAND6          | 3114.00 | 6.01  | 0.98 | 0.21  |
| 50059.00 | A13  | M-008552- antizyme ir  | 51582.00 | AZIN1           | 1837.00 | 3.38  | 1.65 | -0.35 |
| 50059.00 | A14  | M-021181- hypothetic   | 54468.00 | FLJ20323        | 2199.00 | 4.59  | 0.44 | -0.09 |
| 50059.00 | A15  | M-015381- PCF11, clea  | 51585.00 | PCF11           | 1070.00 | 2.43  | 2.60 | -0.55 |
| 50059.00 | A16  | M-028950- ankyrin re   | 54467.00 | ANKIB1          | 2922.00 | 2.40  | 2.63 | -0.56 |
| 50059.00 | A17  | M-017015- PC2 (positi  | 51586.00 | PCQAP           | 3524.00 | 10.27 | 5.24 | 1.12  |
| 50059.00 | A18  | M-021182- spindlin far | 54466.00 | SPIN2A          | 2793.00 | 4.62  | 0.41 | -0.09 |
| 50059.00 | A19  | M-019234- ARS2 prote   | 51593.00 | ARS2            | 1314.00 | 3.73  | 1.30 | -0.28 |
| 50059.00 | A20  | M-021193- Ewing's tur  | 54465.00 | ETAA1           | 1756.00 | 4.61  | 0.42 | -0.09 |
| 50059.00 | A21  | M-020986- neuroblast   | 51594.00 | NAG             | 1402.00 | 9.34  | 4.31 | 0.92  |
| 50059.00 | A23  | M-020978- cutA divale  | 51596.00 | CUTA            | 1922.00 | 12.54 | 7.51 | 1.60  |
| 50059.00 | B02  | M-020715- glutamine-   | 54870.00 | QRICH1          | 2613.00 | 0.65  | 4.38 | -0.93 |
| 50059.00 | B04  | M-013370- EPS8-like 1  | 54869.00 | EPS8L1          | 2579.00 | 0.78  | 4.25 | -0.91 |
| 50059.00 | B05  | M-015713- DiGeorge s   | 54487.00 | DGCR8           | 4028.00 | 0.60  | 4.43 | -0.95 |
| 50059.00 | B06  | M-007329- transmeml    | 54868.00 | TMEM104         | 4158.00 | 2.43  | 2.60 | -0.55 |
| 50059.00 | B07  | M-015187- UDP glucur   | 54490.00 | UGT2B28         | 4143.00 | 3.69  | 1.34 | -0.28 |
| 50059.00 | B08  | M-017177- hypothetic   | 54867.00 | FLJ20254        | 3854.00 | 1.45  | 3.58 | -0.76 |
| 50059.00 | B09  | M-020519- family with  | 54491.00 | FAM105A         | 4419.00 | 0.79  | 4.24 | -0.90 |
| 50059.00 | B10  | M-013014- G patch do   | 54865.00 | GPATCH4         | 3917.00 | 0.87  | 4.16 | -0.89 |
| 50059.00 | B11  | M-020517- chromosor    | 54494.00 | C11orf71        | 2626.00 | 1.33  | 3.70 | -0.79 |
| 50059.00 | B12  | M-020707- chromosor    | 54863.00 | C9orf167        | 3738.00 | 0.67  | 4.36 | -0.93 |
| 50059.00 | B13  | M-020944- thioredoxir  | 54495.00 | TXNDC10         | 3845.00 | 1.59  | 3.44 | -0.73 |
| 50059.00 | B14  | M-015744- coiled-coil  | 54862.00 | CC2D1A          | 4163.00 | 1.39  | 3.64 | -0.78 |
| 50059.00 | B15  | M-010160- protein arg  | 54496.00 | PRMT7           | 3872.00 | 0.34  | 4.69 | -1.00 |
| 50059.00 | B16  | M-013369- membrane     | 54860.00 | MS4A12          | 3945.00 | 3.47  | 1.56 | -0.33 |
| 50059.00 | B17  | M-022657- HEAT repe    | 54497.00 | HEATR5B         | 4560.00 | 1.16  | 3.87 | -0.82 |
| 50059.00 | B18  | M-020705- transmeml    | 54859.00 | TMEM103         | 3532.00 | 0.85  | 4.18 | -0.89 |
| 50059.00 | B19  | M-009493- spermine c   | 54498.00 | SMOX            | 3038.00 | 0.92  | 4.11 | -0.88 |
| 50059.00 | B20  | M-005994- pyroglutan   | 54858.00 | PGPEP1          | 3653.00 | 0.99  | 4.04 | -0.86 |
| 50059.00 | B21  | M-013757- transmeml    | 54499.00 | TMCO1           | 3528.00 | 1.84  | 3.19 | -0.68 |
| 50059.00 | B23  | M-020512- RNA-bindir   | 54502.00 | FLJ20273        | 3584.00 | 5.08  | 0.05 | 0.01  |
| 50059.00 | C02  | M-013754- 5'-3' exorit | 54464.00 | XRN1            | 3239.00 | 0.86  | 4.17 | -0.89 |
| 50059.00 | C04  | M-016936- family with  | 54463.00 | FAM134B         | 2224.00 | 1.21  | 3.82 | -0.81 |
| 50059.00 | C05  | M-008405- lipoyltransi | 51601.00 | LIPT1           | 3570.00 | 1.43  | 3.60 | -0.77 |
| 50059.00 | C06  | M-013753- KIAA1128     | 54462.00 | KIAA1128        | 2927.00 | 2.56  | 2.47 | -0.53 |
| 50059.00 | C07  | M-017973- nucleolar p  | 51602.00 | NOP5/NOF        | 3261.00 | 0.52  | 4.51 | -0.96 |
| 50059.00 | C08  | M-013389- F-box and    | 54461.00 | FBXW5           | 3968.00 | 3.10  | 1.93 | -0.41 |



|              |                        |                   |         |      |      |       |
|--------------|------------------------|-------------------|---------|------|------|-------|
| 50059.00 C09 | M-015132- KIAA0859     | 51603.00 KIAA0859 | 4738.00 | 1.98 | 3.05 | -0.65 |
| 50059.00 C10 | M-013388- mitochond    | 54460.00 MRPS21   | 1704.00 | 2.11 | 2.92 | -0.62 |
| 50059.00 C11 | M-003691- phosphatic   | 51604.00 PIGT     | 3168.00 | 5.62 | 0.59 | 0.13  |
| 50059.00 C12 | M-021337- proline rich | 54458.00 PRR13    | 1857.00 | 1.99 | 3.04 | -0.65 |
| 50059.00 C13 | M-017324- CGI-09 pro   | 51605.00 CGI-09   | 4144.00 | 2.92 | 2.11 | -0.45 |
| 50059.00 C14 | M-013387- Mov10L1, M   | 54456.00 MOV10L1  | 3923.00 | 5.53 | 0.50 | 0.11  |
| 50059.00 C15 | M-020967- chromosor    | 51608.00 C7orf20  | 4379.00 | 1.78 | 3.25 | -0.69 |
| 50059.00 C16 | M-022191- F-box prot   | 54455.00 FBXO42   | 4912.00 | 3.54 | 1.49 | -0.32 |
| 50059.00 C17 | M-020926- DPH5 hom     | 51611.00 DPH5     | 3293.00 | 0.91 | 4.12 | -0.88 |
| 50059.00 C18 | M-022640- ATPase fan   | 54454.00 ATAD2B   | 3123.00 | 0.54 | 4.49 | -0.96 |
| 50059.00 C19 | M-020898- ERGIC and    | 51614.00 ERGIC3   | 2592.00 | 2.35 | 2.68 | -0.57 |
| 50059.00 C20 | M-008173- Ras and Ra   | 54453.00 RIN2     | 3040.00 | 3.03 | 2.00 | -0.43 |
| 50059.00 C21 | M-008848- HMP19 prc    | 51617.00 HMP19    | 3603.00 | 4.19 | 0.84 | -0.18 |
| 50059.00 C23 | M-021482- chromosor    | 51622.00 C7orf28A | 3753.00 | 3.70 | 1.33 | -0.28 |
| 50059.00 D02 | M-010666- glycerophc   | 54857.00 GDPD2    | 3104.00 | 0.81 | 4.22 | -0.90 |
| 50059.00 D04 | M-019400- gon-4-like   | 54856.00 GON4L    | 4442.00 | 1.19 | 3.84 | -0.82 |
| 50059.00 D05 | M-020510- zinc finger, | 54503.00 ZDHHC13  | 3323.00 | 0.27 | 4.76 | -1.02 |
| 50059.00 D06 | M-020700- family with  | 54855.00 FAM46C   | 3552.00 | 1.52 | 3.51 | -0.75 |
| 50059.00 D07 | M-005828- carboxypep   | 54504.00 CPVL     | 4266.00 | 1.24 | 3.79 | -0.81 |
| 50059.00 D08 | M-020696- family with  | 54854.00 FAM83E   | 4084.00 | 1.49 | 3.54 | -0.75 |
| 50059.00 D09 | M-013759- DEAH (Asp    | 54505.00 DHX29    | 2975.00 | 2.72 | 2.31 | -0.49 |
| 50059.00 D10 | M-015363- WD repeat    | 54853.00 WDR55    | 4519.00 | 1.66 | 3.37 | -0.72 |
| 50059.00 D11 | M-031080- ADAMTS-li    | 54507.00 ADAMTSL4 | 4470.00 | 2.35 | 2.68 | -0.57 |
| 50059.00 D12 | M-020694- ankyrin re   | 54851.00 ANKRD49  | 4289.00 | 2.38 | 2.65 | -0.57 |
| 50059.00 D13 | M-025114- 3-hydroxyr   | 54511.00 HMGCLL1  | 3374.00 | 1.87 | 3.16 | -0.67 |
| 50059.00 D14 | M-020685- hypothetic   | 54849.00 FLJ20186 | 3744.00 | 1.63 | 3.40 | -0.73 |
| 50059.00 D15 | M-013760- exosome c    | 54512.00 EXOSC4   | 4180.00 | 2.54 | 2.49 | -0.53 |
| 50059.00 D16 | M-020674- SID1 transr  | 54847.00 SIDT1    | 4687.00 | 3.76 | 1.27 | -0.27 |
| 50059.00 D17 | M-020495- tudor dom    | 54513.00 TDRD4    | 3519.00 | 1.65 | 3.38 | -0.72 |
| 50059.00 D18 | M-020672- RNA bindin   | 54845.00 RBM35A   | 3819.00 | 2.49 | 2.54 | -0.54 |
| 50059.00 D19 | M-012904- DEAD (Asp    | 54514.00 DDX4     | 4046.00 | 4.45 | 0.58 | -0.12 |
| 50059.00 D20 | M-013555- synaptotag   | 54843.00 SYTL2    | 3253.00 | 3.32 | 1.71 | -0.36 |
| 50059.00 D21 | M-015662- amyloid be   | 54518.00 APBB1IP  | 4635.00 | 5.67 | 0.64 | 0.14  |
| 50059.00 D23 | M-016945- coiled-coil  | 54520.00 CCDC93   | 4082.00 | 2.01 | 3.02 | -0.64 |
| 50059.00 E02 | M-021199- potassium    | 54442.00 KCTD5    | 3021.00 | 0.20 | 4.83 | -1.03 |
| 50059.00 E04 | M-021208- chromosor    | 54440.00 CXorf9   | 4165.00 | 1.25 | 3.78 | -0.81 |
| 50059.00 E05 | M-020872- dynein, cyt  | 51626.00 DYNC2LI1 | 4345.00 | 0.97 | 4.06 | -0.87 |
| 50059.00 E06 | M-024337- RNA bindin   | 54439.00 RBM27    | 2759.00 | 2.32 | 2.71 | -0.58 |
| 50059.00 E07 | M-007319- solute carr  | 51629.00 SLC25A39 | 4719.00 | 3.56 | 1.47 | -0.31 |
| 50059.00 E08 | M-021214- glucose-fru  | 54438.00 GFOD1    | 4153.00 | 0.75 | 4.28 | -0.91 |
| 50059.00 E09 | M-020770- LUC7-like 2  | 51631.00 LUC7L2   | 3666.00 | 2.32 | 2.71 | -0.58 |
| 50059.00 E10 | M-023584- sema domi    | 54437.00 SEMA5B   | 3502.00 | 0.74 | 4.29 | -0.91 |
| 50059.00 E11 | M-008553- OTU doma     | 51633.00 OTUD6B   | 3701.00 | 1.57 | 3.46 | -0.74 |
| 50059.00 E12 | M-016937- SH3 domai    | 54436.00 SH3TC1   | 3209.00 | 1.31 | 3.72 | -0.79 |
| 50059.00 E13 | M-020763- RNA bindin   | 51634.00 RBMX2    | 1818.00 | 1.38 | 3.65 | -0.78 |
| 50059.00 E14 | M-013386- nucleolar p  | 54433.00 NOLA1    | 3511.00 | 1.88 | 3.15 | -0.67 |
| 50059.00 E15 | M-009573- dehydroge    | 51635.00 DHRS7    | 2517.00 | 0.99 | 4.04 | -0.86 |

|          |     |                         |          |           |         |       |       |       |
|----------|-----|-------------------------|----------|-----------|---------|-------|-------|-------|
| 50059.00 | E16 | M-016906- Yip1 doma     | 54432.00 | YIPF1     | 2997.00 | 1.64  | 3.40  | -0.72 |
| 50059.00 | E17 | M-020723- chromosor     | 51637.00 | C14orf166 | 3331.00 | 0.48  | 4.55  | -0.97 |
| 50059.00 | E18 | M-013752- DnaJ (Hsp4    | 54431.00 | DNAJC10   | 2455.00 | 1.67  | 3.36  | -0.72 |
| 50059.00 | E19 | M-020260- splicing fac  | 51639.00 | SF3B14    | 1524.00 | 8.01  | 2.98  | 0.64  |
| 50059.00 | E20 | M-013751- sialic acid a | 54414.00 | SIAE      | 3460.00 | 9.36  | 4.33  | 0.93  |
| 50059.00 | E21 | M-017512- mitochond     | 51642.00 | MRPL48    | 4141.00 | 6.81  | 1.78  | 0.38  |
| 50059.00 | E23 | M-020255- transmembr    | 51643.00 | TMBIM4    | 1913.00 | 11.19 | 6.16  | 1.32  |
| 50059.00 | F02 | M-020665- FLJ20160 p    | 54842.00 | FLJ20160  | 3310.00 | 9.00  | 3.97  | 0.85  |
| 50059.00 | F04 | M-016581- basic, imm    | 54841.00 | BIVM      | 3048.00 | 3.54  | 1.49  | -0.32 |
| 50059.00 | F05 | M-018913- WD repeat     | 54521.00 | WDR44     | 3860.00 | 6.06  | 1.03  | 0.22  |
| 50059.00 | F06 | M-020660- leucine ricl  | 54839.00 | LRRC49    | 4257.00 | 10.15 | 5.12  | 1.09  |
| 50059.00 | F07 | M-026394- ankyrin rep   | 54522.00 | ANKRD16   | 3846.00 | 10.06 | 5.03  | 1.08  |
| 50059.00 | F08 | M-019421- chromosor     | 54838.00 | C10orf26  | 3094.00 | 4.17  | 0.86  | -0.18 |
| 50059.00 | F09 | M-020489- asparagine    | 54529.00 | ASNSD1    | 4440.00 | 12.57 | 7.54  | 1.61  |
| 50059.00 | F10 | M-020655- B-box and     | 54836.00 | BSPRY     | 4311.00 | 9.56  | 4.53  | 0.97  |
| 50059.00 | F11 | M-020485- hypothetic    | 54530.00 | FLJ20054  | 3188.00 | 4.71  | 0.32  | -0.07 |
| 50059.00 | F12 | M-020650- ganglioside   | 54834.00 | GDAP2     | 3516.00 | 10.89 | 5.86  | 1.25  |
| 50059.00 | F13 | M-023917- mesoderm      | 54531.00 | MIER2     | 4496.00 | 19.80 | 14.77 | 3.15  |
| 50059.00 | F14 | M-020641- vacuolar pi   | 54832.00 | VPS13C    | 3702.00 | 12.51 | 7.48  | 1.60  |
| 50059.00 | F15 | M-027186- ubiquitin s   | 54532.00 | USP53     | 2124.00 | 1.74  | 3.29  | -0.70 |
| 50059.00 | F16 | M-020637- bestrophin    | 54831.00 | BEST2     | 3757.00 | 11.18 | 6.15  | 1.31  |
| 50059.00 | F17 | M-013373- mitochond     | 54534.00 | MRPL50    | 3540.00 | 6.16  | 1.13  | 0.24  |
| 50059.00 | F18 | M-020634- nucleopori    | 54830.00 | NUP62CL   | 3723.00 | 5.35  | 0.32  | 0.07  |
| 50059.00 | F19 | M-020481- coiled-coil   | 54535.00 | CCHCR1    | 4580.00 | 9.45  | 4.42  | 0.95  |
| 50059.00 | F20 | M-021479- asporin       | 54829.00 | ASPN      | 3749.00 | 8.96  | 3.93  | 0.84  |
| 50059.00 | F21 | M-021404- exocyst coi   | 54536.00 | EXOC6     | 3938.00 | 11.28 | 6.25  | 1.33  |
| 50059.00 | F23 | M-015216- roundabou     | 54538.00 | ROBO4     | 3216.00 | 17.66 | 12.63 | 2.70  |
| 50059.00 | G02 | M-009084- neuroligin    | 54413.00 | NLGN3     | 4269.00 | 1.24  | 3.79  | -0.81 |
| 50059.00 | G04 | M-007559- solute carr   | 54407.00 | SLC38A2   | 3650.00 | 0.55  | 4.48  | -0.96 |
| 50059.00 | G05 | M-020317- yippee-like   | 51646.00 | YPEL5     | 5046.00 | 1.70  | 3.33  | -0.71 |
| 50059.00 | G06 | M-009593- hydroxyaci    | 54363.00 | HAO1      | 5097.00 | 1.69  | 3.34  | -0.71 |
| 50059.00 | G07 | M-020340- family with   | 51647.00 | FAM96B    | 4333.00 | 1.78  | 3.25  | -0.69 |
| 50059.00 | G08 | M-018039- unc-93 hor    | 54346.00 | UNC93A    | 3489.00 | 1.95  | 3.08  | -0.66 |
| 50059.00 | G09 | M-012973- mitochond     | 51649.00 | MRPS23    | 3371.00 | 0.80  | 4.23  | -0.90 |
| 50059.00 | G10 | M-017492- dolichyl-ph   | 54344.00 | DPM3      | 4701.00 | 1.30  | 3.73  | -0.80 |
| 50059.00 | G11 | M-012940- mitochond     | 51650.00 | MRPS33    | 3373.00 | 2.28  | 2.75  | -0.59 |
| 50059.00 | G12 | M-032251- guanine nu    | 54331.00 | GNG2      | 3969.00 | 3.91  | 1.12  | -0.24 |
| 50059.00 | G13 | M-007271- peptidyl-tR   | 51651.00 | PTRH2     | 3801.00 | 2.68  | 2.35  | -0.50 |
| 50059.00 | G14 | M-021227- syntrophin    | 54221.00 | SNTG2     | 3697.00 | 1.14  | 3.89  | -0.83 |
| 50059.00 | G15 | M-004696- vacuolar pi   | 51652.00 | VPS24     | 3639.00 | 4.95  | 0.08  | -0.02 |
| 50059.00 | G16 | M-021231- syntrophin    | 54212.00 | SNTG1     | 3112.00 | 3.63  | 1.40  | -0.30 |
| 50059.00 | G17 | M-020418- GINS comp     | 51659.00 | GINS2     | 3579.00 | 2.29  | 2.74  | -0.58 |
| 50059.00 | G18 | M-006255- potassium     | 54207.00 | KCNK10    | 4681.00 | 4.14  | 0.89  | -0.19 |
| 50059.00 | G19 | M-020459- brain prote   | 51660.00 | BRP44L    | 3655.00 | 4.60  | 0.43  | -0.09 |
| 50059.00 | G20 | M-017016- ERBB rece     | 54206.00 | ERRF1     | 4030.00 | 8.86  | 3.83  | 0.82  |
| 50059.00 | G21 | M-009436- FK506 binc    | 51661.00 | FKBP7     | 3411.00 | 11.87 | 6.84  | 1.46  |
| 50059.00 | G23 | M-019266- zinc finger   | 51663.00 | ZFR       | 2838.00 | 16.14 | 11.11 | 2.37  |

|              |                        |                     |         |       |      |       |
|--------------|------------------------|---------------------|---------|-------|------|-------|
| 50059.00 H02 | M-010577- breast carc  | 54828.00 BCAS3      | 1913.00 | 6.27  | 1.24 | 0.27  |
| 50059.00 H04 | M-021311- family with  | 54827.00 FAM55D     | 2507.00 | 9.45  | 4.42 | 0.95  |
| 50059.00 H05 | M-016098- NADH dehy    | 54539.00 NDUFB11    | 2413.00 | 5.35  | 0.32 | 0.07  |
| 50059.00 H06 | M-020631- zinc finger, | 54826.00 ZH2C2      | 1779.00 | 2.36  | 2.67 | -0.57 |
| 50059.00 H07 | M-015342- hypothetic   | 54540.00 FLJ10404   | 1646.00 | 3.04  | 1.99 | -0.42 |
| 50059.00 H08 | M-018994- chromosor    | 54823.00 C1orf26    | 1663.00 | 5.41  | 0.38 | 0.08  |
| 50059.00 H09 | M-010855- DNA-dama     | 54541.00 DDIT4      | 2689.00 | 6.95  | 1.92 | 0.41  |
| 50059.00 H10 | M-031581- FLJ20105 p   | 54821.00 FLJ20105   | 2348.00 | 10.01 | 4.98 | 1.06  |
| 50059.00 H11 | M-020453- ring finger  | 54542.00 RC3H2      | 2740.00 | 13.43 | 8.40 | 1.79  |
| 50059.00 H12 | M-020618- zinc finger, | 54819.00 ZCCHC10    | 2830.00 | 7.56  | 2.53 | 0.54  |
| 50059.00 H13 | M-013762- translocase  | 54543.00 TOMM7      | 2296.00 | 2.70  | 2.33 | -0.50 |
| 50059.00 H14 | M-030406- suppressor   | 54816.00 SUHW4      | 2747.00 | 2.26  | 2.77 | -0.59 |
| 50059.00 H15 | M-020449- cysteine-ri  | 54544.00 CRCT1      | 1534.00 | 3.72  | 1.31 | -0.28 |
| 50059.00 H16 | M-015311- GATA zinc    | 54815.00 GATAD2A    | 3526.00 | 6.58  | 1.55 | 0.33  |
| 50059.00 H17 | M-006999- ring finger  | 54546.00 RNF186     | 2149.00 | 1.72  | 3.31 | -0.71 |
| 50059.00 H18 | M-005875- glutaminyl-  | 54814.00 QPCTL      | 2366.00 | 6.80  | 1.77 | 0.38  |
| 50059.00 H19 | M-017396- sidekick ho  | 54549.00 SDK2       | 3322.00 | 4.12  | 0.91 | -0.19 |
| 50059.00 H20 | M-020611- kelch-like 2 | 54813.00 KLHL28     | 3023.00 | 5.59  | 0.56 | 0.12  |
| 50059.00 H21 | M-018938- EF-hand ca   | 54550.00 EFCBP2     | 2712.00 | 13.09 | 8.06 | 1.72  |
| 50059.00 H23 | M-013374- MAGE-like    | 54551.00 MAGEL2     | 2480.00 | 3.75  | 1.28 | -0.27 |
| 50059.00 I02 | M-013399- N-acetyln    | 54187.00 NANS       | 2465.00 | 3.69  | 1.34 | -0.28 |
| 50059.00 I04 | M-020812- chromosor    | 54149.00 C21orf91   | 3034.00 | 5.70  | 0.67 | 0.14  |
| 50059.00 I05 | M-017197- ankyrin re   | 51665.00 ASB1       | 3382.00 | 10.41 | 5.38 | 1.15  |
| 50059.00 I06 | M-008542- mitochond    | 54148.00 MRPL39     | 3093.00 | 5.82  | 0.79 | 0.17  |
| 50059.00 I07 | M-013339- ankyrin re   | 51666.00 ASB4       | 3961.00 | 7.42  | 2.39 | 0.51  |
| 50059.00 I08 | M-010901- H2B histon   | 54145.00 H2BFS      | 2022.00 | 5.64  | 0.61 | 0.13  |
| 50059.00 I09 | M-019158- negative re  | 51667.00 NUB1       | 3318.00 | 10.16 | 5.13 | 1.10  |
| 50059.00 I10 | M-008460- polymerase   | 54107.00 POLE3      | 2620.00 | 11.49 | 6.46 | 1.38  |
| 50059.00 I11 | M-010908- chromosor    | 51668.00 C1orf41    | 2506.00 | 11.77 | 6.74 | 1.44  |
| 50059.00 I12 | M-025410- hypothetic   | 54103.00 tcag7.1314 | 3144.00 | 10.62 | 5.59 | 1.20  |
| 50059.00 I13 | M-015281- transmemb    | 51669.00 TMEM66     | 1045.00 | 3.35  | 1.68 | -0.36 |
| 50059.00 I14 | M-012919- chloride in  | 54102.00 CLIC6      | 1840.00 | 7.77  | 2.74 | 0.59  |
| 50059.00 I15 | M-020505- tubulin pol  | 51673.00 TPPP3      | 3373.00 | 8.45  | 3.42 | 0.73  |
| 50059.00 I16 | M-015462- family with  | 54097.00 FAM3B      | 2563.00 | 10.42 | 5.39 | 1.15  |
| 50059.00 I17 | M-009678- membrane     | 51678.00 MPP6       | 2769.00 | 6.57  | 1.54 | 0.33  |
| 50059.00 I18 | M-006998- SET domain   | 54093.00 SETD4      | 1952.00 | 9.78  | 4.75 | 1.02  |
| 50059.00 I19 | M-021189- LSM7 hom     | 51690.00 LSM7       | 2876.00 | 6.54  | 1.51 | 0.32  |
| 50059.00 I20 | M-016908- chromosor    | 54084.00 C21orf29   | 3111.00 | 10.13 | 5.10 | 1.09  |
| 50059.00 I21 | M-017030- LSM8 hom     | 51691.00 LSM8       | 2526.00 | 11.09 | 6.06 | 1.29  |
| 50059.00 I23 | M-006365- cleavage ai  | 51692.00 CPSF3      | 2846.00 | 4.15  | 0.88 | -0.19 |
| 50059.00 J02 | M-020609- zinc finger  | 54811.00 ZNF562     | 4351.00 | 3.03  | 2.00 | -0.43 |
| 50059.00 J04 | M-031141- sterile alph | 54809.00 SAMD9      | 3722.00 | 3.47  | 1.56 | -0.33 |
| 50059.00 J05 | M-015743- guanine nu   | 54552.00 GNL3L      | 3280.00 | 9.27  | 4.24 | 0.91  |
| 50059.00 J06 | M-017498- dymeclin     | 54808.00 DYM        | 3439.00 | 4.97  | 0.06 | -0.01 |
| 50059.00 J07 | M-017975- DEAD (Asp    | 54555.00 DDX49      | 3016.00 | 3.35  | 1.68 | -0.36 |
| 50059.00 J08 | M-020605- zinc finger  | 54807.00 ZNF586     | 3166.00 | 5.09  | 0.06 | 0.01  |
| 50059.00 J09 | M-013763- small gluta  | 54557.00 SGTB       | 4492.00 | 14.36 | 9.33 | 1.99  |

|              |                        |                   |         |       |      |       |
|--------------|------------------------|-------------------|---------|-------|------|-------|
| 50059.00 J10 | M-018831- tRNA isope   | 54802.00 TRIT1    | 3202.00 | 2.31  | 2.72 | -0.58 |
| 50059.00 J11 | M-020413- spermatog    | 54558.00 SPATA6   | 3355.00 | 12.16 | 7.13 | 1.52  |
| 50059.00 J12 | M-018372- family with  | 54801.00 FAM29A   | 2543.00 | 7.67  | 2.64 | 0.56  |
| 50059.00 J13 | M-013803- erythrocyt   | 54566.00 EPB41L4B | 3492.00 | 4.95  | 0.08 | -0.02 |
| 50059.00 J14 | M-020604- kelch-like 2 | 54800.00 KLHL24   | 2952.00 | 5.32  | 0.29 | 0.06  |
| 50059.00 J15 | M-013764- UDP glucur   | 54575.00 UGT1A10  | 2293.00 | 6.11  | 1.08 | 0.23  |
| 50059.00 J16 | M-020602- dachsous 2   | 54798.00 DCHS2    | 4004.00 | 9.32  | 4.29 | 0.92  |
| 50059.00 J17 | M-013765- UDP glucur   | 54577.00 UGT1A7   | 2896.00 | 3.25  | 1.78 | -0.38 |
| 50059.00 J18 | M-020600- mediator c   | 54797.00 MED18    | 4261.00 | 10.35 | 5.32 | 1.14  |
| 50059.00 J19 | M-031996- UDP glucur   | 54579.00 UGT1A5   | 3190.00 | 4.83  | 0.20 | -0.04 |
| 50059.00 J20 | M-032217- basonuclin   | 54796.00 BNC2     | 2244.00 | 9.58  | 4.55 | 0.97  |
| 50059.00 J21 | M-013048- SCAN domi    | 54581.00 SCAND2   | 2582.00 | 3.10  | 1.93 | -0.41 |
| 50059.00 J23 | M-012960- guanine nu   | 54584.00 GNB1L    | 2451.00 | 4.24  | 0.79 | -0.17 |
| 50059.00 K02 | M-031393- chromosor    | 54083.00 C21orf30 | 2221.00 | 1.49  | 3.54 | -0.76 |
| 50059.00 K04 | M-015218- chromosor    | 54072.00 C21orf42 | 3106.00 | 7.50  | 2.47 | 0.53  |
| 50059.00 K05 | M-021254- trafficking  | 51693.00 TRAPPC2L | 2912.00 | 5.39  | 0.36 | 0.08  |
| 50059.00 K06 | M-020789- chromosor    | 54069.00 C21orf45 | 2930.00 | 4.37  | 0.66 | -0.14 |
| 50059.00 K07 | M-021156- headcase h   | 51696.00 HECA     | 3989.00 | 13.79 | 8.76 | 1.87  |
| 50059.00 K08 | M-016949- chromosor    | 54065.00 C21orf51 | 2773.00 | 5.34  | 0.31 | 0.07  |
| 50059.00 K09 | M-009764- vacuolar pi  | 51699.00 VPS29    | 3102.00 | 13.31 | 8.28 | 1.77  |
| 50059.00 K10 | M-031405- chromosor    | 54059.00 C21orf57 | 2860.00 | 4.30  | 0.73 | -0.15 |
| 50059.00 K11 | M-021051- peptidyl ar  | 51702.00 PADI3    | 2333.00 | 2.31  | 2.72 | -0.58 |
| 50059.00 K12 | M-015217- chromosor    | 54058.00 C21orf58 | 2630.00 | 5.10  | 0.07 | 0.01  |
| 50059.00 K13 | M-015860- endomucir    | 51705.00 EMCN     | 2746.00 | 6.92  | 1.89 | 0.40  |
| 50059.00 K14 | M-013199- poly(rC) bli | 54039.00 PCBP3    | 1486.00 | 3.03  | 2.00 | -0.43 |
| 50059.00 K15 | M-004996- selenoprot   | 51714.00 SELT     | 2316.00 | 9.28  | 4.25 | 0.91  |
| 50059.00 K16 | M-013507- ferritin, he | 53940.00 FTHL17   | 2600.00 | 3.81  | 1.22 | -0.26 |
| 50059.00 K17 | M-015407- calcium bir  | 51719.00 CAB39    | 3638.00 | 14.35 | 9.32 | 1.99  |
| 50059.00 K18 | M-009868- peptidylpro  | 53938.00 PPIL3    | 3303.00 | 9.14  | 4.11 | 0.88  |
| 50059.00 K19 | M-020905- F-box prote  | 51725.00 FBXO40   | 2017.00 | 1.44  | 3.59 | -0.77 |
| 50059.00 K20 | M-007436- solute carr  | 53919.00 SLCO1C1  | 3897.00 | 13.09 | 8.06 | 1.72  |
| 50059.00 K21 | M-015861- DnaJ (Hsp4   | 51726.00 DNAJB11  | 2914.00 | 9.75  | 4.72 | 1.01  |
| 50059.00 K23 | M-013358- polymerasi   | 51728.00 POLR3K   | 3145.00 | 5.21  | 0.18 | 0.04  |
| 50059.00 L02 | M-020591- potassium    | 54793.00 KCTD9    | 2048.00 | 4.44  | 0.59 | -0.12 |
| 50059.00 L04 | M-013776- KIAA1546     | 54790.00 KIAA1546 | 2761.00 | 3.01  | 2.02 | -0.43 |
| 50059.00 L05 | M-026125- chromosor    | 54586.00 C9orf11  | 2695.00 | 2.71  | 2.32 | -0.49 |
| 50059.00 L06 | M-020585- DnaJ (Hsp4   | 54788.00 DNAJB12  | 3722.00 | 5.86  | 0.83 | 0.18  |
| 50059.00 L07 | M-017976- LINE-1 type  | 54596.00 L1TD1    | 3751.00 | 3.71  | 1.32 | -0.28 |
| 50059.00 L08 | M-020574- chromosor    | 54785.00 C17orf59 | 1848.00 | 4.33  | 0.70 | -0.15 |
| 50059.00 L09 | M-021767- Nedd4 fam    | 54602.00 NDFIP2   | 4128.00 | 8.21  | 3.18 | 0.68  |
| 50059.00 L10 | M-004282- alkB, alkyl  | 54784.00 ALKBH4   | 2974.00 | 2.49  | 2.54 | -0.54 |
| 50059.00 L11 | M-020410- DEAD (Asp    | 54606.00 DDX56    | 2110.00 | 2.18  | 2.85 | -0.61 |
| 50059.00 L12 | M-020566- non-SMC e    | 54780.00 NSMCE4A  | 2443.00 | 9.78  | 4.75 | 1.02  |
| 50059.00 L13 | M-004176- INO80 corr   | 54617.00 INOC1    | 2634.00 | 2.89  | 2.14 | -0.46 |
| 50059.00 L14 | M-007002- ring finger  | 54778.00 RNF111   | 3383.00 | 10.20 | 5.17 | 1.10  |
| 50059.00 L15 | M-031874- F-box and l  | 54620.00 FBXL19   | 1550.00 | 2.06  | 2.97 | -0.63 |
| 50059.00 L16 | M-018404- chromosor    | 54777.00 C10orf92 | 2862.00 | 6.43  | 1.40 | 0.30  |

|          |     |                        |          |          |         |       |       |       |
|----------|-----|------------------------|----------|----------|---------|-------|-------|-------|
| 50059.00 | L17 | M-020362- hypothetical | 54621.00 | FLJ20674 | 2703.00 | 4.48  | 0.55  | -0.12 |
| 50059.00 | L18 | M-008720- DIRAS fami   | 54769.00 | DIRAS2   | 4468.00 | 5.60  | 0.57  | 0.12  |
| 50059.00 | L19 | M-020355- ADP-ribosy   | 54622.00 | ARL15    | 4398.00 | 3.93  | 1.10  | -0.23 |
| 50059.00 | L20 | M-022583- hydroceph    | 54768.00 | HYDIN    | 4011.00 | 8.78  | 3.75  | 0.80  |
| 50059.00 | L21 | M-020349- Paf1, RNA    | 54623.00 | PAF1     | 2756.00 | 3.08  | 1.95  | -0.41 |
| 50059.00 | L23 | M-027389- hairy and e  | 54626.00 | HES2     | 3111.00 | 1.86  | 3.17  | -0.67 |
| 50059.00 | M02 | M-019068- pelota hon   | 53918.00 | PELO     | 2131.00 | 1.60  | 3.43  | -0.73 |
| 50059.00 | M04 | M-008828- RAB24, me    | 53917.00 | RAB24    | 3157.00 | 4.91  | 0.12  | -0.02 |
| 50059.00 | M05 | M-013343- WW doma      | 51729.00 | WBP11    | 1630.00 | 2.27  | 2.76  | -0.59 |
| 50059.00 | M06 | M-008126- dual oxida   | 53905.00 | DUOX1    | 2551.00 | 2.39  | 2.64  | -0.56 |
| 50059.00 | M07 | M-020886- ureidopro    | 51733.00 | UPB1     | 4679.00 | 8.36  | 3.33  | 0.71  |
| 50059.00 | M08 | M-028307- claudin 22   | 53842.00 | CLDN22   | 2611.00 | 4.56  | 0.47  | -0.10 |
| 50059.00 | M09 | M-020883- selenoprot   | 51734.00 | SEPX1    | 3567.00 | 3.20  | 1.83  | -0.39 |
| 50059.00 | M10 | M-012987- mucin-like   | 53841.00 | MUPCDH   | 3982.00 | 4.39  | 0.64  | -0.13 |
| 50059.00 | M11 | M-017028- HIG1 dom     | 51751.00 | HIGD1B   | 4029.00 | 13.60 | 8.57  | 1.83  |
| 50059.00 | M12 | M-006997- tripartite n | 53840.00 | TRIM34   | 3437.00 | 10.88 | 5.85  | 1.25  |
| 50059.00 | M13 | M-017716- chromosor    | 51754.00 | C9orf127 | 2657.00 | 7.94  | 2.91  | 0.62  |
| 50059.00 | M14 | M-014035- chromosor    | 53838.00 | C11orf24 | 3281.00 | 7.50  | 2.47  | 0.53  |
| 50059.00 | M15 | M-020231- chromosor    | 51759.00 | C9orf78  | 3360.00 | 8.63  | 3.60  | 0.77  |
| 50059.00 | M16 | M-017419- FXYD dom     | 53828.00 | FXYD4    | 4429.00 | 10.41 | 5.38  | 1.15  |
| 50059.00 | M17 | M-020736- synaptotag   | 51760.00 | SYT17    | 3472.00 | 8.67  | 3.64  | 0.78  |
| 50059.00 | M18 | M-003670- FXYD dom     | 53827.00 | FXYD5    | 3504.00 | 13.33 | 8.30  | 1.77  |
| 50059.00 | M19 | M-008744- RAB8B, me    | 51762.00 | RAB8B    | 4974.00 | 20.37 | 15.34 | 3.28  |
| 50059.00 | M20 | M-013055- FXYD dom     | 53826.00 | FXYD6    | 4908.00 | 13.79 | 8.76  | 1.87  |
| 50059.00 | M21 | M-017494- skeletal m   | 51763.00 | SKIP     | 3447.00 | 14.27 | 9.24  | 1.97  |
| 50059.00 | M23 | M-020691- guanine nu   | 51764.00 | GNG13    | 3254.00 | 6.48  | 1.45  | 0.31  |
| 50059.00 | N02 | M-017337- tripartite n | 54765.00 | TRIM44   | 4283.00 | 3.18  | 1.85  | -0.40 |
| 50059.00 | N04 | M-009270- zinc finger, | 54764.00 | ZRANB1   | 2597.00 | 5.62  | 0.59  | 0.13  |
| 50059.00 | N05 | M-013769- KIAA1383     | 54627.00 | KIAA1383 | 5479.00 | 8.82  | 3.79  | 0.81  |
| 50059.00 | N06 | M-017062- ropporin, r  | 54763.00 | ROPN1    | 3128.00 | 8.15  | 3.12  | 0.67  |
| 50059.00 | N07 | M-022254- family with  | 54629.00 | FAM63B   | 3880.00 | 14.82 | 9.79  | 2.09  |
| 50059.00 | N08 | M-020545- GRAM dom     | 54762.00 | GRAMD1C  | 2415.00 | 8.49  | 3.46  | 0.74  |
| 50059.00 | N09 | M-016946- TBC1 dom     | 54662.00 | TBC1D13  | 3412.00 | 12.46 | 7.43  | 1.59  |
| 50059.00 | N10 | M-013774- proprotein   | 54760.00 | PCSK4    | 4127.00 | 10.59 | 5.56  | 1.19  |
| 50059.00 | N11 | M-020315- WD repeat    | 54663.00 | WDR74    | 4902.00 | 9.75  | 4.72  | 1.01  |
| 50059.00 | N12 | M-017013- kelch dom    | 54758.00 | KLHDC4   | 4186.00 | 18.51 | 13.48 | 2.88  |
| 50059.00 | N13 | M-020307- transmeml    | 54664.00 | TMEM106I | 3960.00 | 11.89 | 6.86  | 1.47  |
| 50059.00 | N14 | M-013773- family with  | 54757.00 | FAM20A   | 3935.00 | 5.39  | 0.36  | 0.08  |
| 50059.00 | N15 | M-020299- round sper   | 54665.00 | RSBN1    | 4295.00 | 10.62 | 5.59  | 1.19  |
| 50059.00 | N16 | M-007946- interleukin  | 54756.00 | IL17RD   | 2538.00 | 7.80  | 2.77  | 0.59  |
| 50059.00 | N17 | M-018214- leucine ricl | 54674.00 | LRRN3    | 4385.00 | 16.53 | 11.50 | 2.46  |
| 50059.00 | N18 | M-026260- family with  | 54754.00 | FAM22F   | 3409.00 | 10.27 | 5.24  | 1.12  |
| 50059.00 | N19 | M-017910- cardiolipin  | 54675.00 | CRLS1    | 4403.00 | 12.45 | 7.42  | 1.58  |
| 50059.00 | N20 | M-020530- fibronectin  | 54752.00 | FNDC8    | 4430.00 | 18.08 | 13.05 | 2.79  |
| 50059.00 | N21 | M-015310- GTP bindin   | 54676.00 | GTPBP2   | 4123.00 | 18.29 | 13.26 | 2.83  |
| 50059.00 | N23 | M-016316- chromosor    | 54680.00 | C1orf181 | 3018.00 | 12.43 | 7.40  | 1.58  |
| 50059.00 | O02 | M-013056- FXYD dom     | 53822.00 | FXYD7    | 1469.00 | 4.70  | 0.33  | -0.07 |

|          |     |                        |          |           |         |       |       |         |
|----------|-----|------------------------|----------|-----------|---------|-------|-------|---------|
| 50059.00 | O04 | M-021244- Down synd    | 53820.00 | DSCR6     | 3670.00 | 17.14 | 12.11 | 2.59    |
| 50059.00 | O05 | M-005745- transmeml    | 51768.00 | TM7SF3    | 4534.00 | 15.33 | 10.30 | 2.20    |
| 50059.00 | O06 | M-005210- prostate tu  | 53635.00 | PTOV1     | 4222.00 | 22.50 | 17.47 | 3.73    |
| 50059.00 | O07 | M-020374- remodeling   | 51773.00 | RSF1      | 3706.00 | 7.83  | 2.80  | 0.60    |
| 50059.00 | O08 | M-013403- beta-carotl  | 53630.00 | BCMO1     | 4766.00 | 6.97  | 1.94  | 0.41    |
| 50059.00 | O09 | M-015384- myozenin 2   | 51778.00 | MYOZ2     | 2505.00 | 11.02 | 5.99  | 1.28    |
| 50059.00 | O10 | M-020624- syntaxin 18  | 53407.00 | STX18     | 3605.00 | 10.15 | 5.12  | 1.09    |
| 50059.00 | O11 | M-020378- jumonji do   | 51780.00 | JMJD1B    | 3093.00 | 8.34  | 3.31  | 0.71    |
| 50059.00 | O12 | M-010710- two pore s   | 53373.00 | TPCN1     | 3471.00 | 4.64  | 0.39  | -0.08   |
| 50059.00 | O13 | M-010155- coenzyme     | 51805.00 | COQ3      | 2878.00 | 13.00 | 7.97  | 1.70    |
| 50059.00 | O14 | M-017570- nucleopori   | 53371.00 | NUP54     | 2996.00 | 6.71  | 1.68  | 0.36    |
| 50059.00 | O15 | M-013402- UDP-N-ace    | 51809.00 | GALNT7    | 3446.00 | 11.75 | 6.72  | 1.44    |
| 50059.00 | O16 | M-013086- zinc finger, | 53349.00 | ZFYVE1    | 3114.00 | 5.62  | 0.59  | 0.13    |
| 50059.00 | O17 | M-009521- cat eye syn  | 51816.00 | CECR1     | 1628.00 | 7.13  | 2.10  | 0.45    |
| 50059.00 | O18 | M-014229- transmeml    | 53346.00 | TM6SF1    | 3429.00 | 3.56  | 1.47  | -0.31   |
| 50059.00 | O19 | M-018637- CPX chrom    | 53336.00 | CPXCR1    | 5113.00 | 10.66 | 5.63  | 1.20    |
| 50059.00 | O20 | M-008858- nudix (nucl  | 53343.00 | NUDT9     | 3737.00 | 6.56  | 1.53  | 0.33    |
| 50059.00 | O21 | M-014617- BTB (POZ) r  | 53339.00 | BTBD1     | 4251.00 | 6.94  | 1.91  | 0.41    |
| 50059.00 | O23 | M-007940- interleukin  | 53342.00 | IL17D     | 2297.00 | 14.80 | 9.77  | 2.09    |
| 50059.00 | P02 | M-013772- filamin bin  | 54751.00 | FBLIM1    | 2203.00 | 10.71 | 5.68  | 1.21    |
| 50059.00 | P04 | M-013378- ependymir    | 54749.00 | EPDR1     | 2478.00 | 4.44  | 0.59  | -0.13   |
| 50059.00 | P05 | M-018215- MANSC do     | 54682.00 | MANSC1    | 2832.00 | 11.55 | 6.52  | 1.39    |
| 50059.00 | P06 | M-020243- hypothetic   | 54744.00 | DKFZp566f | 2529.00 | 7.04  | 2.01  | 0.43    |
| 50059.00 | P07 | M-020288- ATP bindin   | 54707.00 | ATPBD1B   | 2545.00 | 14.62 | 9.59  | 2.05    |
| 50059.00 | P08 | M-013771- lymphocyt    | 54742.00 | LY6K      | 3296.00 | 10.98 | 5.95  | 1.27    |
| 50059.00 | P09 | M-007001- membrane     | 54708.00 | MARCH5    | 1666.00 | 6.06  | 1.03  | 0.22    |
| 50059.00 | P10 | M-020214- FEV (ETS oi  | 54738.00 | FEV       | 1861.00 | 9.94  | 4.91  | 1.05    |
| 50059.00 | P11 | M-007640- solute carr  | 54716.00 | SLC6A20   | 2304.00 | 7.64  | 2.61  | 0.56    |
| 50059.00 | P12 | M-021680- M-phase p    | 54737.00 | HSMPP8    | 3245.00 | 6.53  | 1.50  | 0.32    |
| 50059.00 | P13 | M-021361- butyrophili  | 54718.00 | BTN2A3    | 3465.00 | 23.43 | 18.40 | 3.93    |
| 50059.00 | P14 | M-026511- RAB39, me    | 54734.00 | RAB39     | 2403.00 | 21.39 | 16.36 | 3.49    |
| 50059.00 | P15 | M-007085- zinc finger  | 84146.00 | ZNF644    | 2701.00 | 9.74  | 4.71  | 1.01    |
| 50059.00 | P16 | M-018216- solute carr  | 54733.00 | SLC35F2   | 2355.00 | 12.48 | 7.45  | 1.59    |
| 50059.00 | P17 | M-015498- chromosor    | 54073.00 | C21orf41  | 2448.00 | 14.95 | 9.92  | 2.12    |
| 50059.00 | P18 | M-007924- transmeml    | 54732.00 | TMED9     | 3845.00 | 25.83 | 20.80 | 4.44    |
| 50059.00 | P19 | M-016404- chromosor    | 54143.00 | C21orf74  | 1398.00 | 15.38 | 10.35 | 2.21    |
| 50059.00 | P20 | M-009927- OTU doma     | 54726.00 | OTUD4     | 2250.00 | 6.22  | 1.19  | 0.26    |
| 50059.00 | P21 | M-021204- DKFZp434/    | 54441.00 | DKFZP434/ | 2608.00 | 9.89  | 4.86  | 1.04    |
| 50059.00 | P23 | M-015341- pseudouric   | 54517.00 | PUS7      | 1377.00 | 2.61  | 2.42  | -0.51   |
|          |     |                        |          |           | 3253.50 | 5.03  | 3.16  |         |
|          |     |                        |          | MAD3      |         |       | 9.49  |         |
|          |     |                        |          | MADc      |         |       | 4.68  |         |
| 50059.00 | C22 |                        |          |           | 2896.00 | 32.80 |       |         |
| 50059.00 | D22 |                        |          |           | 4451.00 | 31.54 |       |         |
| 50059.00 | E22 |                        |          |           | 1805.00 | 36.45 |       | 2817.00 |
| 50059.00 | F22 |                        |          |           | 2438.00 | 39.46 |       | 2918.00 |
|          |     |                        |          | mn        | 2897.50 | 35.07 |       | 2867.50 |

|              |           |         |       |        |
|--------------|-----------|---------|-------|--------|
|              | sd        | 1128.13 | 3.59  | 71.42  |
| 50059.00 G22 |           | 720.00  | 1.67  | 567.00 |
| 50059.00 H22 |           | 556.00  | 1.26  | 890.00 |
| 50059.00 I22 |           | 588.00  | 0.34  | 753.00 |
| 50059.00 J22 |           | 904.00  | 1.77  | 933.00 |
|              | mn        | 682.67  | 1.12  | 858.67 |
|              | sd        | 192.35  | 0.72  | 94.00  |
|              | 3psSD     |         | 10.78 |        |
|              | 3ngSD     |         | 2.17  |        |
|              | SumSD     |         | 12.96 |        |
|              | DiffMn    |         | 33.94 |        |
|              | SmovrDiff |         | 0.38  |        |
|              | 1minus    |         | 0.62  |        |

|              |                                  |         |           |         |      |         |
|--------------|----------------------------------|---------|-----------|---------|------|---------|
| 50059.00 G03 | M-003290- polo-like ki           | 5347.00 | PLK1 SMAF | 471.00  | 0.42 | 317.00  |
| 50059.00 H03 | M-003290- polo-like ki           | 5347.00 | PLK1 SMAF | 111.00  | 7.21 | 129.00  |
| 50059.00 I03 | D-001206- siControl non-targetin |         |           | 3076.00 | 8.71 | 2542.00 |
| 50059.00 J03 | D-001206- siControl non-targetin |         |           | 3815.00 | 7.00 | 3899.00 |
| 50059.00 K03 | D-001600- siGLO RISC-free siRNA  |         |           | 4590.00 | 7.36 | 4557.00 |
| 50059.00 L03 | D-001600- siGLO RISC-free siRNA  |         |           | 4203.00 | 9.47 | 4007.00 |

| Cell Coun % inf | Abs Dev | rZ   | Cell Count | % inf   | Abs Dev | rZ    |       |
|-----------------|---------|------|------------|---------|---------|-------|-------|
| 3579.00         | 2.07    | 0.36 | -0.16      | 2805.00 | 3.99    | 4.82  | -0.81 |
| 1500.00         | 0.87    | 1.56 | -0.70      | 2637.00 | 4.02    | 4.79  | -0.81 |
| 1048.00         | 4.58    | 2.15 | 0.96       | 1454.00 | 2.27    | 6.54  | -1.10 |
| 1238.00         | 1.29    | 1.14 | -0.51      | 1219.00 | 2.38    | 6.43  | -1.08 |
| 2520.00         | 0.95    | 1.48 | -0.66      | 2185.00 | 3.20    | 5.61  | -0.94 |
| 2881.00         | 1.91    | 0.52 | -0.23      | 1855.00 | 6.52    | 2.29  | -0.38 |
| 2182.00         | 0.73    | 1.70 | -0.76      | 2447.00 | 5.39    | 3.42  | -0.57 |
| 2084.00         | 1.25    | 1.18 | -0.53      | 4079.00 | 6.79    | 2.02  | -0.34 |
| 2643.00         | 2.42    | 0.01 | 0.00       | 2354.00 | 6.75    | 2.06  | -0.35 |
| 2088.00         | 1.92    | 0.51 | -0.23      | 1941.00 | 3.40    | 5.41  | -0.91 |
| 1360.00         | 1.84    | 0.59 | -0.26      | 315.00  | 54.60   | 45.79 | 7.69  |
| 2125.00         | 2.07    | 0.36 | -0.16      | 3127.00 | 8.25    | 0.56  | -0.09 |
| 1932.00         | 2.69    | 0.26 | 0.12       | 1520.00 | 3.62    | 5.19  | -0.87 |
| 1467.00         | 2.32    | 0.11 | -0.05      | 3250.00 | 3.32    | 5.49  | -0.92 |
| 1465.00         | 2.12    | 0.31 | -0.14      | 3158.00 | 8.14    | 0.67  | -0.11 |
| 1429.00         | 3.99    | 1.56 | 0.70       | 2905.00 | 6.82    | 1.99  | -0.34 |
| 1475.00         | 2.71    | 0.28 | 0.13       | 2476.00 | 3.92    | 4.89  | -0.82 |
| 2378.00         | 2.61    | 0.18 | 0.08       | 2588.00 | 2.90    | 5.91  | -0.99 |
| 2421.00         | 3.72    | 1.29 | 0.57       | 1431.00 | 2.10    | 6.71  | -1.13 |
| 1594.00         | 4.02    | 1.59 | 0.71       | 1733.00 | 3.12    | 5.69  | -0.96 |
| 4013.00         | 0.75    | 1.68 | -0.75      | 3255.00 | 0.80    | 8.01  | -1.35 |
| 1567.00         | 1.98    | 0.45 | -0.20      | 1806.00 | 0.94    | 7.87  | -1.32 |
| 3608.00         | 1.05    | 1.38 | -0.62      | 4536.00 | 0.44    | 8.37  | -1.41 |
| 4233.00         | 1.20    | 1.23 | -0.55      | 3391.00 | 1.24    | 7.57  | -1.27 |
| 5045.00         | 0.12    | 2.31 | -1.03      | 3457.00 | 1.65    | 7.16  | -1.20 |
| 4606.00         | 0.24    | 2.19 | -0.98      | 3706.00 | 0.84    | 7.97  | -1.34 |
| 2827.00         | 0.14    | 2.29 | -1.02      | 2086.00 | 0.67    | 8.14  | -1.37 |
| 2434.00         | 0.37    | 2.06 | -0.92      | 2812.00 | 1.24    | 7.57  | -1.27 |
| 2671.00         | 0.56    | 1.87 | -0.83      | 2459.00 | 1.71    | 7.10  | -1.19 |
| 3515.00         | 0.40    | 2.03 | -0.91      | 2615.00 | 0.34    | 8.47  | -1.42 |
| 3694.00         | 0.32    | 2.11 | -0.94      | 2613.00 | 0.88    | 7.93  | -1.33 |
| 3536.00         | 0.11    | 2.32 | -1.03      | 1822.00 | 0.88    | 7.93  | -1.33 |
| 3613.00         | 0.25    | 2.18 | -0.97      | 2491.00 | 0.84    | 7.97  | -1.34 |
| 2738.00         | 0.84    | 1.59 | -0.71      | 2026.00 | 1.33    | 7.48  | -1.26 |
| 2811.00         | 0.36    | 2.07 | -0.93      | 2804.00 | 1.43    | 7.38  | -1.24 |
| 2721.00         | 1.32    | 1.11 | -0.49      | 1632.00 | 0.18    | 8.63  | -1.45 |
| 3416.00         | 0.23    | 2.20 | -0.98      | 2179.00 | 0.92    | 7.89  | -1.33 |
| 4933.00         | 0.77    | 1.66 | -0.74      | 1947.00 | 0.77    | 8.04  | -1.35 |
| 4619.00         | 0.95    | 1.48 | -0.66      | 2830.00 | 0.92    | 7.89  | -1.33 |
| 2450.00         | 1.18    | 1.25 | -0.56      | 2631.00 | 1.75    | 7.06  | -1.19 |
| 3507.00         | 0.94    | 1.49 | -0.67      | 3231.00 | 7.27    | 1.54  | -0.26 |
| 3107.00         | 0.19    | 2.24 | -1.00      | 1455.00 | 5.15    | 3.66  | -0.61 |
| 3063.00         | 0.59    | 1.84 | -0.82      | 2998.00 | 3.87    | 4.94  | -0.83 |
| 3959.00         | 1.11    | 1.32 | -0.59      | 3237.00 | 9.02    | 0.21  | 0.04  |
| 3969.00         | 0.30    | 2.13 | -0.95      | 2330.00 | 2.36    | 6.45  | -1.08 |
| 3453.00         | 1.10    | 1.33 | -0.59      | 2796.00 | 13.91   | 5.10  | 0.86  |



|         |      |      |       |         |       |      |       |
|---------|------|------|-------|---------|-------|------|-------|
| 3623.00 | 0.97 | 1.46 | -0.65 | 3365.00 | 9.51  | 0.70 | 0.12  |
| 1667.00 | 1.62 | 0.81 | -0.36 | 1662.00 | 14.92 | 6.11 | 1.03  |
| 3409.00 | 2.61 | 0.18 | 0.08  | 2305.00 | 18.31 | 9.50 | 1.60  |
| 2181.00 | 0.23 | 2.20 | -0.98 | 1867.00 | 7.07  | 1.74 | -0.29 |
| 3549.00 | 0.39 | 2.04 | -0.91 | 2724.00 | 6.98  | 1.84 | -0.31 |
| 3443.00 | 0.61 | 1.82 | -0.81 | 1987.00 | 14.04 | 5.23 | 0.88  |
| 3805.00 | 0.68 | 1.75 | -0.78 | 2337.00 | 9.33  | 0.52 | 0.09  |
| 3776.00 | 1.67 | 0.76 | -0.34 | 3358.00 | 13.01 | 4.20 | 0.71  |
| 2924.00 | 0.85 | 1.58 | -0.70 | 2304.00 | 8.59  | 0.22 | -0.04 |
| 3861.00 | 0.60 | 1.83 | -0.82 | 2251.00 | 4.93  | 3.88 | -0.65 |
| 2778.00 | 0.68 | 1.75 | -0.78 | 2381.00 | 7.52  | 1.29 | -0.22 |
| 4930.00 | 1.30 | 1.13 | -0.51 | 3312.00 | 9.39  | 0.58 | 0.10  |
| 4405.00 | 2.38 | 0.05 | -0.02 | 2811.00 | 16.12 | 7.31 | 1.23  |
| 4003.00 | 1.12 | 1.31 | -0.58 | 3179.00 | 13.24 | 4.43 | 0.74  |
| 2565.00 | 0.35 | 2.08 | -0.93 | 5233.00 | 7.32  | 1.49 | -0.25 |
| 3293.00 | 0.09 | 2.34 | -1.04 | 3811.00 | 1.99  | 6.82 | -1.15 |
| 3522.00 | 0.54 | 1.89 | -0.84 | 4249.00 | 3.15  | 5.66 | -0.95 |
| 3676.00 | 0.44 | 1.99 | -0.89 | 4182.00 | 3.54  | 5.27 | -0.89 |
| 5111.00 | 0.49 | 1.94 | -0.87 | 3499.00 | 5.14  | 3.67 | -0.62 |
| 3503.00 | 0.26 | 2.17 | -0.97 | 3733.00 | 7.47  | 1.34 | -0.22 |
| 3243.00 | 0.52 | 1.91 | -0.85 | 2989.00 | 7.96  | 0.85 | -0.14 |
| 4036.00 | 0.52 | 1.91 | -0.85 | 3139.00 | 4.68  | 4.13 | -0.69 |
| 4108.00 | 0.54 | 1.89 | -0.85 | 4147.00 | 8.51  | 0.30 | -0.05 |
| 2975.00 | 0.50 | 1.93 | -0.86 | 4214.00 | 7.17  | 1.64 | -0.28 |
| 3810.00 | 0.60 | 1.83 | -0.82 | 3175.00 | 4.44  | 4.37 | -0.73 |
| 2477.00 | 0.36 | 2.07 | -0.92 | 2939.00 | 7.18  | 1.63 | -0.27 |
| 2980.00 | 0.77 | 1.66 | -0.74 | 2377.00 | 5.93  | 2.88 | -0.48 |
| 3853.00 | 0.36 | 2.07 | -0.92 | 3963.00 | 12.67 | 3.86 | 0.65  |
| 5094.00 | 0.86 | 1.57 | -0.70 | 4056.00 | 12.55 | 3.74 | 0.63  |
| 3650.00 | 0.63 | 1.80 | -0.80 | 3703.00 | 8.16  | 0.65 | -0.11 |
| 4431.00 | 1.69 | 0.74 | -0.33 | 3045.00 | 6.08  | 2.73 | -0.46 |
| 3543.00 | 1.04 | 1.39 | -0.62 | 3339.00 | 12.07 | 3.26 | 0.55  |
| 3568.00 | 0.59 | 1.84 | -0.82 | 3245.00 | 14.21 | 5.40 | 0.91  |
| 4082.00 | 0.10 | 2.33 | -1.04 | 4512.00 | 12.01 | 3.20 | 0.54  |
| 4704.00 | 1.53 | 0.90 | -0.40 | 3689.00 | 1.55  | 7.26 | -1.22 |
| 4181.00 | 2.44 | 0.01 | 0.00  | 3676.00 | 4.46  | 4.35 | -0.73 |
| 3833.00 | 1.75 | 0.68 | -0.30 | 3726.00 | 3.30  | 5.51 | -0.93 |
| 2776.00 | 3.67 | 1.24 | 0.56  | 3164.00 | 9.13  | 0.32 | 0.05  |
| 3384.00 | 2.01 | 0.42 | -0.19 | 4122.00 | 11.67 | 2.86 | 0.48  |
| 3974.00 | 1.43 | 1.00 | -0.44 | 3019.00 | 3.35  | 5.46 | -0.92 |
| 2728.00 | 3.23 | 0.80 | 0.36  | 2113.00 | 8.47  | 0.34 | -0.06 |
| 4158.00 | 2.50 | 0.07 | 0.03  | 3289.00 | 4.74  | 4.07 | -0.68 |
| 4306.00 | 3.23 | 0.80 | 0.36  | 3954.00 | 5.24  | 3.57 | -0.60 |
| 4042.00 | 3.24 | 0.81 | 0.36  | 3649.00 | 7.21  | 1.60 | -0.27 |
| 1431.00 | 1.82 | 0.61 | -0.27 | 1652.00 | 1.33  | 7.48 | -1.26 |
| 1873.00 | 0.80 | 1.63 | -0.73 | 3070.00 | 2.77  | 6.04 | -1.02 |
| 1804.00 | 1.05 | 1.38 | -0.62 | 2299.00 | 2.70  | 6.11 | -1.03 |

|         |      |      |       |         |       |       |         |
|---------|------|------|-------|---------|-------|-------|---------|
| 2231.00 | 1.97 | 0.46 | -0.20 | 3227.00 | 8.15  | 0.66  | -0.11   |
| 3188.00 | 1.35 | 1.08 | -0.48 | 2396.00 | 3.38  | 5.43  | -0.91   |
| 1796.00 | 1.00 | 1.43 | -0.64 | 2002.00 | 4.15  | 4.66  | -0.78   |
| 1060.00 | 6.23 | 3.80 | 1.69  | 841.00  | 13.67 | 4.86  | 0.82    |
| 4222.00 | 6.80 | 4.37 | 1.95  | 4049.00 | 16.70 | 7.89  | 1.32    |
| 3581.00 | 3.07 | 0.64 | 0.29  | 4122.00 | 10.55 | 1.74  | 0.29    |
| 1835.00 | 3.49 | 1.06 | 0.47  | 3963.00 | 10.45 | 1.64  | 0.27    |
| 3654.00 | 4.21 | 1.78 | 0.80  | 3533.00 | 24.74 | 15.93 | 2.68    |
| 3464.00 | 3.20 | 0.77 | 0.35  | 3337.00 | 14.38 | 5.57  | 0.94    |
| 2816.00 | 2.70 | 0.27 | 0.12  | 2384.00 | 7.93  | 0.88  | -0.15   |
| 2733.00 | 2.16 | 0.27 | -0.12 | 1567.00 | 7.47  | 1.34  | -0.23   |
| 2996.00 | 2.84 | 0.41 | 0.18  | 2108.00 | 12.71 | 3.90  | 0.66    |
| 2580.00 | 0.31 | 2.12 | -0.95 | 1898.00 | 7.43  | 1.38  | -0.23   |
| 3271.00 | 2.38 | 0.05 | -0.02 | 2681.00 | 9.96  | 1.15  | 0.19    |
| 2826.00 | 1.27 | 1.16 | -0.52 | 2791.00 | 14.76 | 5.95  | 1.00    |
| 3782.00 | 1.96 | 0.47 | -0.21 | 2286.00 | 5.86  | 2.95  | -0.50   |
| 1886.00 | 5.67 | 3.24 | 1.45  | 1790.00 | 8.60  | 0.21  | -0.04   |
| 2312.00 | 2.72 | 0.29 | 0.13  | 2512.00 | 10.35 | 1.54  | 0.26    |
| 3051.00 | 4.59 | 2.16 | 0.96  | 2863.00 | 15.58 | 6.77  | 1.14    |
| 1916.00 | 0.99 | 1.44 | -0.64 | 1765.00 | 5.61  | 3.20  | -0.54   |
| 2815.00 | 3.30 | 0.87 | 0.39  | 2627.00 | 8.95  | 0.14  | 0.02    |
| 2320.00 | 2.72 | 0.29 | 0.13  | 2491.00 | 3.13  | 5.68  | -0.95   |
| 3250.00 | 1.78 | 0.65 | -0.29 | 3090.00 | 5.21  | 3.60  | -0.61   |
| 3269.00 | 4.31 | 1.88 | 0.84  | 3480.00 | 6.90  | 1.91  | -0.32   |
| 3644.00 | 3.24 | 0.81 | 0.36  | 4000.00 | 5.38  | 3.44  | -0.58   |
| 3536.00 | 6.33 | 3.90 | 1.74  | 3676.00 | 13.00 | 4.19  | 0.70    |
| 3985.00 | 8.58 | 6.15 | 2.75  | 3817.00 | 5.87  | 2.94  | -0.49 y |
| 4714.00 | 4.01 | 1.58 | 0.70  | 5754.00 | 16.86 | 8.05  | 1.35    |
| 4623.00 | 2.14 | 0.29 | -0.13 | 4014.00 | 10.39 | 1.58  | 0.27    |
| 4936.00 | 2.78 | 0.35 | 0.15  | 5193.00 | 11.92 | 3.11  | 0.52    |
| 3794.00 | 2.85 | 0.42 | 0.19  | 5103.00 | 10.43 | 1.62  | 0.27    |
| 4661.00 | 2.72 | 0.29 | 0.13  | 4594.00 | 11.45 | 2.64  | 0.44    |
| 3634.00 | 3.71 | 1.28 | 0.57  | 3549.00 | 17.27 | 8.46  | 1.42    |
| 3583.00 | 1.09 | 1.34 | -0.60 | 3023.00 | 7.77  | 1.04  | -0.17   |
| 3896.00 | 1.08 | 1.35 | -0.60 | 3643.00 | 4.06  | 4.75  | -0.80   |
| 3351.00 | 2.24 | 0.19 | -0.09 | 3597.00 | 13.12 | 4.31  | 0.72    |
| 2879.00 | 2.74 | 0.31 | 0.14  | 4143.00 | 17.36 | 8.55  | 1.44    |
| 2472.00 | 1.86 | 0.57 | -0.25 | 3191.00 | 11.00 | 2.19  | 0.37    |
| 3663.00 | 2.62 | 0.19 | 0.08  | 3067.00 | 7.04  | 1.77  | -0.30   |
| 3473.00 | 5.13 | 2.70 | 1.20  | 4724.00 | 14.33 | 5.52  | 0.93    |
| 4540.00 | 7.14 | 4.71 | 2.10  | 3959.00 | 22.38 | 13.57 | 2.28 y  |
| 2693.00 | 1.89 | 0.54 | -0.24 | 2807.00 | 4.67  | 4.14  | -0.70   |
| 3420.00 | 3.68 | 1.25 | 0.56  | 4976.00 | 12.66 | 3.85  | 0.65    |
| 3208.00 | 3.99 | 1.56 | 0.70  | 4839.00 | 16.68 | 7.87  | 1.32    |
| 3724.00 | 4.03 | 1.60 | 0.71  | 3603.00 | 12.63 | 3.82  | 0.64    |
| 2869.00 | 2.51 | 0.08 | 0.04  | 4907.00 | 17.91 | 9.10  | 1.53    |
| 3477.00 | 4.69 | 2.26 | 1.01  | 4824.00 | 23.78 | 14.97 | 2.51 y  |

|         |      |      |       |         |       |      |       |
|---------|------|------|-------|---------|-------|------|-------|
| 3174.00 | 3.81 | 1.38 | 0.62  | 4123.00 | 8.25  | 0.56 | -0.09 |
| 3706.00 | 8.55 | 6.12 | 2.73  | 3957.00 | 14.05 | 5.24 | 0.88  |
| 3791.00 | 1.77 | 0.66 | -0.30 | 4515.00 | 9.97  | 1.16 | 0.19  |
| 2376.00 | 0.67 | 1.76 | -0.78 | 1992.00 | 5.07  | 3.74 | -0.63 |
| 2451.00 | 2.28 | 0.15 | -0.07 | 1886.00 | 4.08  | 4.73 | -0.79 |
| 3224.00 | 3.60 | 1.17 | 0.52  | 1618.00 | 16.07 | 7.26 | 1.22  |
| 4719.00 | 4.37 | 1.94 | 0.86  | 2946.00 | 8.66  | 0.15 | -0.03 |
| 2909.00 | 3.78 | 1.35 | 0.60  | 1363.00 | 9.76  | 0.95 | 0.16  |
| 3173.00 | 4.41 | 1.98 | 0.88  | 3194.00 | 15.31 | 6.50 | 1.09  |
| 3281.00 | 1.83 | 0.60 | -0.27 | 2629.00 | 7.19  | 1.62 | -0.27 |
| 2680.00 | 0.93 | 1.50 | -0.67 | 2377.00 | 4.46  | 4.35 | -0.73 |
| 3245.00 | 1.39 | 1.04 | -0.47 | 2283.00 | 4.16  | 4.65 | -0.78 |
| 3203.00 | 1.56 | 0.87 | -0.39 | 2222.00 | 5.18  | 3.63 | -0.61 |
| 3512.00 | 2.99 | 0.56 | 0.25  | 3426.00 | 9.81  | 1.00 | 0.17  |
| 3235.00 | 1.51 | 0.92 | -0.41 | 2162.00 | 5.37  | 3.44 | -0.58 |
| 3339.00 | 5.75 | 3.32 | 1.48  | 2854.00 | 11.56 | 2.75 | 0.46  |
| 4083.00 | 2.35 | 0.08 | -0.04 | 4575.00 | 10.89 | 2.08 | 0.35  |
| 3883.00 | 2.99 | 0.56 | 0.25  | 4392.00 | 8.47  | 0.34 | -0.06 |
| 3577.00 | 4.36 | 1.93 | 0.86  | 3584.00 | 15.12 | 6.31 | 1.06  |
| 3686.00 | 1.55 | 0.88 | -0.39 | 3591.00 | 4.96  | 3.85 | -0.65 |
| 2881.00 | 5.94 | 3.51 | 1.56  | 3180.00 | 7.52  | 1.29 | -0.22 |
| 2332.00 | 2.40 | 0.03 | -0.01 | 3798.00 | 7.08  | 1.73 | -0.29 |
| 2490.00 | 6.99 | 4.56 | 2.03  | 2731.00 | 13.40 | 4.59 | 0.77  |
| 2301.00 | 3.35 | 0.92 | 0.41  | 2860.00 | 3.92  | 4.89 | -0.82 |
| 3106.00 | 4.70 | 2.27 | 1.01  | 3221.00 | 5.90  | 2.91 | -0.49 |
| 1881.00 | 5.26 | 2.83 | 1.26  | 3326.00 | 10.91 | 2.10 | 0.35  |
| 2712.00 | 7.93 | 5.50 | 2.45  | 3860.00 | 13.71 | 4.90 | 0.82  |
| 2699.00 | 5.63 | 3.20 | 1.43  | 4341.00 | 16.06 | 7.25 | 1.22  |
| 2563.00 | 6.59 | 4.16 | 1.86  | 3819.00 | 16.00 | 7.19 | 1.21  |
| 2491.00 | 6.50 | 4.07 | 1.82  | 3873.00 | 13.48 | 4.67 | 0.78  |
| 1085.00 | 1.66 | 0.77 | -0.34 | 2458.00 | 5.13  | 3.68 | -0.62 |
| 2604.00 | 5.88 | 3.45 | 1.54  | 3509.00 | 9.23  | 0.42 | 0.07  |
| 2817.00 | 3.34 | 0.91 | 0.40  | 3102.00 | 6.42  | 2.39 | -0.40 |
| 3910.00 | 8.34 | 5.91 | 2.64  | 4252.00 | 17.03 | 8.22 | 1.38  |
| 2556.00 | 2.00 | 0.43 | -0.19 | 2835.00 | 8.85  | 0.04 | 0.01  |
| 2553.00 | 7.87 | 5.44 | 2.43  | 2762.00 | 12.31 | 3.50 | 0.59  |
| 2522.00 | 2.62 | 0.19 | 0.08  | 2388.00 | 4.31  | 4.50 | -0.76 |
| 3040.00 | 2.63 | 0.20 | 0.09  | 4103.00 | 6.75  | 2.06 | -0.35 |
| 2585.00 | 5.42 | 2.99 | 1.33  | 3379.00 | 9.29  | 0.48 | 0.08  |
| 2681.00 | 4.36 | 1.93 | 0.86  | 3484.00 | 7.06  | 1.75 | -0.29 |
| 4669.00 | 0.81 | 1.62 | -0.72 | 4501.00 | 9.18  | 0.37 | 0.06  |
| 3355.00 | 1.52 | 0.91 | -0.41 | 4030.00 | 9.06  | 0.25 | 0.04  |
| 2790.00 | 1.58 | 0.85 | -0.38 | 2868.00 | 9.97  | 1.16 | 0.19  |
| 3245.00 | 1.69 | 0.74 | -0.33 | 3498.00 | 5.55  | 3.26 | -0.55 |
| 2000.00 | 0.50 | 1.93 | -0.86 | 2650.00 | 2.26  | 6.55 | -1.10 |
| 2289.00 | 0.79 | 1.64 | -0.73 | 2933.00 | 8.11  | 0.70 | -0.12 |
| 4502.00 | 2.47 | 0.04 | 0.02  | 4765.00 | 17.00 | 8.19 | 1.38  |

|         |       |       |       |         |       |       |        |
|---------|-------|-------|-------|---------|-------|-------|--------|
| 3038.00 | 0.53  | 1.90  | -0.85 | 2654.00 | 5.58  | 3.23  | -0.54  |
| 3007.00 | 6.52  | 4.09  | 1.83  | 4034.00 | 19.73 | 10.92 | 1.84   |
| 1751.00 | 1.71  | 0.72  | -0.32 | 2600.00 | 7.31  | 1.50  | -0.25  |
| 3317.00 | 2.53  | 0.10  | 0.05  | 3377.00 | 10.25 | 1.44  | 0.24   |
| 2815.00 | 2.52  | 0.09  | 0.04  | 2688.00 | 5.21  | 3.60  | -0.61  |
| 2529.00 | 4.55  | 2.12  | 0.95  | 2582.00 | 9.22  | 0.41  | 0.07   |
| 3922.00 | 4.46  | 2.03  | 0.91  | 4090.00 | 9.12  | 0.31  | 0.05   |
| 3128.00 | 2.49  | 0.06  | 0.03  | 2517.00 | 4.81  | 4.00  | -0.67  |
| 4832.00 | 8.57  | 6.14  | 2.74  | 4860.00 | 13.75 | 4.94  | 0.83   |
| 3662.00 | 3.52  | 1.09  | 0.49  | 3370.00 | 3.09  | 5.72  | -0.96  |
| 3829.00 | 15.54 | 13.11 | 5.85  | 3992.00 | 12.15 | 3.34  | 0.56   |
| 2336.00 | 10.02 | 7.59  | 3.39  | 3442.00 | 7.70  | 1.11  | -0.19  |
| 2613.00 | 5.20  | 2.77  | 1.24  | 4093.00 | 5.57  | 3.24  | -0.54  |
| 2890.00 | 6.96  | 4.53  | 2.02  | 2985.00 | 15.58 | 6.77  | 1.14   |
| 2838.00 | 10.18 | 7.75  | 3.46  | 2425.00 | 15.55 | 6.74  | 1.13   |
| 4020.00 | 6.22  | 3.79  | 1.69  | 3550.00 | 12.11 | 3.30  | 0.55   |
| 3170.00 | 2.62  | 0.19  | 0.08  | 3341.00 | 8.77  | 0.04  | -0.01  |
| 4307.00 | 12.12 | 9.69  | 4.33  | 3690.00 | 17.59 | 8.78  | 1.47   |
| 2644.00 | 4.05  | 1.62  | 0.72  | 3042.00 | 14.04 | 5.23  | 0.88   |
| 4094.00 | 14.95 | 12.52 | 5.59  | 3368.00 | 22.06 | 13.25 | 2.23 y |
| 2269.00 | 2.95  | 0.52  | 0.23  | 3416.00 | 11.48 | 2.67  | 0.45   |
| 1887.00 | 1.59  | 0.84  | -0.38 | 2482.00 | 7.53  | 1.28  | -0.21  |
| 2958.00 | 4.23  | 1.80  | 0.80  | 2883.00 | 11.93 | 3.12  | 0.52   |
| 2458.00 | 4.72  | 2.29  | 1.02  | 3080.00 | 12.86 | 4.05  | 0.68   |
| 2294.00 | 4.66  | 2.23  | 1.00  | 1980.00 | 3.13  | 5.68  | -0.95  |
| 2336.00 | 7.83  | 5.40  | 2.41  | 2582.00 | 12.82 | 4.01  | 0.67   |
| 2978.00 | 1.98  | 0.45  | -0.20 | 3244.00 | 4.13  | 4.68  | -0.79  |
| 3016.00 | 6.57  | 4.14  | 1.85  | 2352.00 | 16.54 | 7.73  | 1.30   |
| 2570.00 | 5.41  | 2.98  | 1.33  | 2438.00 | 10.46 | 1.65  | 0.28   |
| 1852.00 | 1.35  | 1.08  | -0.48 | 2804.00 | 1.93  | 6.88  | -1.16  |
| 3971.00 | 7.45  | 5.02  | 2.24  | 4627.00 | 12.08 | 3.27  | 0.55   |
| 3154.00 | 3.65  | 1.22  | 0.54  | 3541.00 | 10.73 | 1.92  | 0.32   |
| 3190.00 | 1.38  | 1.05  | -0.47 | 4858.00 | 6.83  | 1.98  | -0.33  |
| 3298.00 | 3.46  | 1.03  | 0.46  | 3294.00 | 14.39 | 5.58  | 0.94   |
| 2729.00 | 2.71  | 0.28  | 0.13  | 2668.00 | 8.17  | 0.64  | -0.11  |
| 2741.00 | 2.33  | 0.10  | -0.04 | 1942.00 | 8.14  | 0.67  | -0.11  |
| 2479.00 | 2.02  | 0.41  | -0.18 | 2916.00 | 13.41 | 4.60  | 0.77   |
| 2446.00 | 0.70  | 1.73  | -0.77 | 2800.00 | 9.25  | 0.44  | 0.07   |
| 1445.00 | 0.97  | 1.46  | -0.65 | 1617.00 | 10.27 | 1.46  | 0.24   |
| 3160.00 | 2.63  | 0.20  | 0.09  | 4297.00 | 23.16 | 14.35 | 2.41   |
| 1985.00 | 1.56  | 0.87  | -0.39 | 2183.00 | 14.43 | 5.62  | 0.94   |
| 2216.00 | 0.99  | 1.44  | -0.64 | 1630.00 | 10.49 | 1.68  | 0.28   |
| 1987.00 | 1.51  | 0.92  | -0.41 | 2390.00 | 21.80 | 12.99 | 2.18   |
| 2044.00 | 0.78  | 1.65  | -0.74 | 1973.00 | 7.96  | 0.85  | -0.14  |
| 3152.00 | 2.79  | 0.36  | 0.16  | 2763.00 | 26.13 | 17.32 | 2.91   |
| 1619.00 | 2.41  | 0.02  | -0.01 | 1803.00 | 4.66  | 4.15  | -0.70  |
| 2892.00 | 1.00  | 1.43  | -0.64 | 2236.00 | 9.62  | 0.81  | 0.14   |

|         |      |      |       |         |       |       |        |
|---------|------|------|-------|---------|-------|-------|--------|
| 2901.00 | 2.34 | 0.09 | -0.04 | 3196.00 | 17.62 | 8.81  | 1.48   |
| 4616.00 | 3.83 | 1.40 | 0.63  | 3190.00 | 9.56  | 0.75  | 0.13   |
| 2719.00 | 1.62 | 0.81 | -0.36 | 3512.00 | 10.36 | 1.55  | 0.26   |
| 2122.00 | 3.72 | 1.29 | 0.58  | 2831.00 | 14.06 | 5.25  | 0.88   |
| 2537.00 | 1.26 | 1.17 | -0.52 | 2705.00 | 4.62  | 4.19  | -0.70  |
| 2199.00 | 2.14 | 0.29 | -0.13 | 2360.00 | 9.28  | 0.47  | 0.08   |
| 3250.00 | 0.62 | 1.81 | -0.81 | 3108.00 | 9.20  | 0.39  | 0.07   |
| 3839.00 | 1.22 | 1.21 | -0.54 | 2896.00 | 10.53 | 1.72  | 0.29   |
| 2359.00 | 0.89 | 1.54 | -0.69 | 2084.00 | 7.29  | 1.52  | -0.26  |
| 2594.00 | 0.50 | 1.93 | -0.86 | 2849.00 | 7.48  | 1.33  | -0.22  |
| 3355.00 | 1.94 | 0.49 | -0.22 | 3489.00 | 20.81 | 12.00 | 2.02   |
| 2875.00 | 1.01 | 1.42 | -0.63 | 3194.00 | 16.69 | 7.88  | 1.32   |
| 3211.00 | 0.78 | 1.65 | -0.74 | 2737.00 | 9.21  | 0.40  | 0.07   |
| 4663.00 | 0.90 | 1.53 | -0.68 | 2159.00 | 4.91  | 3.90  | -0.66  |
| 4225.00 | 2.75 | 0.32 | 0.14  | 3471.00 | 13.54 | 4.73  | 0.79   |
| 2753.00 | 1.45 | 0.98 | -0.44 | 2426.00 | 15.09 | 6.28  | 1.05   |
| 2327.00 | 0.99 | 1.44 | -0.64 | 1278.00 | 7.36  | 1.45  | -0.24  |
| 3515.00 | 1.34 | 1.09 | -0.49 | 2199.00 | 12.73 | 3.92  | 0.66   |
| 4005.00 | 2.85 | 0.42 | 0.19  | 2741.00 | 12.84 | 4.03  | 0.68   |
| 4642.00 | 2.46 | 0.03 | 0.01  | 2429.00 | 12.52 | 3.71  | 0.62   |
| 3798.00 | 1.69 | 0.74 | -0.33 | 2152.00 | 12.97 | 4.16  | 0.70   |
| 4570.00 | 4.20 | 1.77 | 0.79  | 2116.00 | 13.42 | 4.61  | 0.77   |
| 2960.00 | 5.84 | 3.41 | 1.52  | 2581.00 | 13.75 | 4.94  | 0.83   |
| 4123.00 | 2.74 | 0.31 | 0.14  | 2533.00 | 4.46  | 4.35  | -0.73  |
| 3006.00 | 6.25 | 3.82 | 1.71  | 1849.00 | 12.87 | 4.06  | 0.68   |
| 2311.00 | 2.90 | 0.47 | 0.21  | 1713.00 | 6.48  | 2.33  | -0.39  |
| 1973.00 | 0.86 | 1.57 | -0.70 | 2645.00 | 6.96  | 1.85  | -0.31  |
| 1491.00 | 0.40 | 2.03 | -0.91 | 2441.00 | 12.17 | 3.36  | 0.56   |
| 3068.00 | 1.56 | 0.87 | -0.39 | 3529.00 | 15.08 | 6.27  | 1.05   |
| 2241.00 | 1.92 | 0.51 | -0.23 | 2636.00 | 13.62 | 4.81  | 0.81   |
| 2944.00 | 3.97 | 1.54 | 0.69  | 3216.00 | 26.59 | 17.78 | 2.99 y |
| 1148.00 | 3.22 | 0.79 | 0.35  | 2681.00 | 25.07 | 16.26 | 2.73   |
| 1919.00 | 1.46 | 0.97 | -0.43 | 2747.00 | 17.07 | 8.26  | 1.39   |
| 3417.00 | 1.43 | 1.00 | -0.44 | 2456.00 | 9.85  | 1.04  | 0.18   |
| 2536.00 | 1.26 | 1.17 | -0.52 | 2346.00 | 7.29  | 1.52  | -0.26  |
| 2453.00 | 4.65 | 2.22 | 0.99  | 4239.00 | 30.36 | 21.55 | 3.62 y |
| 2788.00 | 2.33 | 0.10 | -0.04 | 2901.00 | 12.41 | 3.60  | 0.60   |
| 2223.00 | 1.39 | 1.04 | -0.46 | 1851.00 | 4.48  | 4.33  | -0.73  |
| 2876.00 | 1.32 | 1.11 | -0.50 | 2650.00 | 10.23 | 1.42  | 0.24   |
| 1043.00 | 1.73 | 0.70 | -0.31 | 2809.00 | 6.16  | 2.65  | -0.45  |
| 2842.00 | 6.65 | 4.22 | 1.88  | 3384.00 | 18.47 | 9.66  | 1.62   |
| 2335.00 | 2.70 | 0.27 | 0.12  | 2561.00 | 12.73 | 3.92  | 0.66   |
| 3582.00 | 8.24 | 5.81 | 2.59  | 3694.00 | 13.13 | 4.32  | 0.73   |
| 3217.00 | 7.52 | 5.09 | 2.27  | 4201.00 | 21.64 | 12.83 | 2.16 y |
| 2874.00 | 3.86 | 1.43 | 0.64  | 3647.00 | 20.81 | 12.00 | 2.02 y |
| 2970.00 | 8.69 | 6.26 | 2.79  | 2990.00 | 10.87 | 2.06  | 0.35   |
| 1246.00 | 1.52 | 0.91 | -0.40 | 1934.00 | 7.96  | 0.85  | -0.14  |

|         |       |         |       |         |         |       |       |   |            |
|---------|-------|---------|-------|---------|---------|-------|-------|---|------------|
| 3926.00 | 11.49 | 9.06    | 4.04  | 3367.00 | 23.88   | 15.07 | 2.53  | y |            |
| 4718.00 | 8.16  | 5.73    | 2.56  | 4893.00 | 19.48   | 10.67 | 1.79  | y |            |
| 3165.00 | 10.08 | 7.65    | 3.42  | 4561.00 | 20.02   | 11.21 | 1.88  | y |            |
| 3283.00 | 5.88  | 3.45    | 1.54  | 2615.00 | 13.00   | 4.19  | 0.70  |   |            |
| 4309.00 | 6.03  | 3.60    | 1.61  | 3893.00 | 15.03   | 6.22  | 1.04  |   |            |
| 2660.00 | 6.69  | 4.26    | 1.90  | 2410.00 | 14.36   | 5.55  | 0.93  |   |            |
| 2577.00 | 6.13  | 3.70    | 1.65  | 2562.00 | 27.64   | 18.83 | 3.16  |   |            |
| 3379.00 | 10.60 | 8.17    | 3.65  | 2083.00 | 15.89   | 7.08  | 1.19  |   |            |
| 2828.00 | 2.30  | 0.13    | -0.06 | 3097.00 | 10.91   | 2.10  | 0.35  |   |            |
| 4009.00 | 20.53 | 18.10   | 8.08  | 2954.00 | 28.74   | 19.93 | 3.35  | y |            |
| 3242.00 | 4.26  | 1.83    | 0.82  | 2196.00 | 13.43   | 4.62  | 0.78  |   |            |
| 3403.00 | 13.05 | 10.62   | 4.74  | 2589.00 | 19.24   | 10.43 | 1.75  |   |            |
| 2696.00 | 7.97  | 5.54    | 2.48  | 2784.00 | 12.79   | 3.98  | 0.67  |   |            |
| 1466.00 | 8.73  | 6.30    | 2.81  | 1461.00 | 17.32   | 8.51  | 1.43  |   |            |
| 2368.00 | 6.55  | 4.12    | 1.84  | 3091.00 | 5.99    | 2.82  | -0.47 |   |            |
| 3104.00 | 9.95  | 7.52    | 3.36  | 3545.00 | 14.53   | 5.72  | 0.96  |   |            |
| 3207.00 | 6.61  | 4.18    | 1.87  | 3403.00 | 17.57   | 8.76  | 1.47  |   |            |
| 4732.00 | 15.60 | 13.17   | 5.88  | 3673.00 | 19.33   | 10.52 | 1.77  |   |            |
| 2534.00 | 14.88 | 12.45   | 5.56  | 2782.00 | 19.05   | 10.24 | 1.72  | x | debris a,b |
| 1646.00 | 8.75  | 6.32    | 2.82  | 1895.00 | 8.76    | 0.05  | -0.01 |   |            |
| 1194.00 | 5.19  | 2.76    | 1.23  | 1897.00 | 5.75    | 3.06  | -0.52 |   |            |
| 1390.00 | 9.06  | 6.63    | 2.96  | 2040.00 | 4.90    | 3.91  | -0.66 |   |            |
| 2501.00 | 7.96  | 5.53    | 2.47  | 3233.00 | 6.65    | 2.16  | -0.36 |   |            |
| 1512.00 | 8.47  | 6.04    | 2.69  | 1942.00 | 5.46    | 3.35  | -0.56 | x | toxic b,c  |
| 1205.00 | 4.90  | 2.47    | 1.10  | 2425.00 | 5.86    | 2.95  | -0.50 |   |            |
| 1064.00 | 3.38  | 0.95    | 0.43  | 1332.00 | 3.45    | 5.36  | -0.90 |   |            |
| 1312.00 | 14.63 | 12.20   | 5.45  | 1155.00 | 9.35    | 0.54  | 0.09  |   |            |
| 1770.00 | 6.78  | 4.35    | 1.94  | 938.00  | 3.09    | 5.72  | -0.96 |   |            |
| 1429.00 | 4.97  | 2.54    | 1.13  | 2468.00 | 4.58    | 4.23  | -0.71 |   |            |
| 1800.00 | 12.94 | 10.51   | 4.69  | 3066.00 | 11.94   | 3.13  | 0.53  | y |            |
| 1249.00 | 11.29 | 8.86    | 3.96  | 2951.00 | 9.39    | 0.58  | 0.10  | y |            |
| 1996.00 | 6.96  | 4.53    | 2.02  | 1884.00 | 4.30    | 4.51  | -0.76 |   |            |
| 2270.00 | 7.05  | 4.62    | 2.06  | 1940.00 | 6.86    | 1.95  | -0.33 |   |            |
| 1992.00 | 7.73  | 5.30    | 2.37  | 997.00  | 5.32    | 3.49  | -0.59 | x | toxic b,c  |
| 3146.00 | 13.70 | 11.27   | 5.03  | 1817.00 | 10.90   | 2.09  | 0.35  |   |            |
| 1823.00 | 16.79 | 14.36   | 6.41  | 2780.00 | 16.44   | 7.63  | 1.28  | y |            |
| 1443.00 | 5.68  | 3.25    | 1.45  | 2789.00 | 5.95    | 2.86  | -0.48 |   |            |
| 1818.00 | 1.98  | 0.45    | -0.20 | 1788.00 | 2.40    | 6.41  | -1.08 |   |            |
| 1644.00 | 8.70  | 6.27    | 2.80  | 1337.00 | 6.13    | 2.68  | -0.45 |   |            |
| 2965.00 | 2.43  | 1.51    |       | 2865.50 | 8.81    | 4.02  | 0.00  |   |            |
|         |       | 4.54    |       |         |         | 12.06 |       |   |            |
|         |       | 2.24    |       |         |         | 5.95  |       |   |            |
|         |       | 2718.00 | 35.69 |         | 3423.00 | 19.52 |       |   |            |
|         |       | 3820.00 | 39.76 |         | 4845.00 | 15.89 |       |   |            |
| 26.66   |       | 4266.00 | 42.50 |         |         |       |       |   |            |
| 32.28   |       | 3109.00 | 21.39 |         |         |       |       |   |            |
| 29.47   |       | 3478.25 | 34.84 |         |         |       |       |   |            |

|       |         |       |
|-------|---------|-------|
| 3.98  | 695.62  | 9.39  |
| 1.06  | 1446.00 | 4.56  |
| 0.67  | 707.00  | 1.41  |
| 2.66  | 440.00  | 0.91  |
| 3.00  | 916.00  | 1.86  |
| 2.11  | 687.67  | 1.39  |
| 1.26  | 238.59  | 0.47  |
| 11.93 |         | 28.17 |
| 3.77  |         | 1.42  |
| 15.69 |         | 29.59 |
| 27.36 |         | 33.44 |
| 0.57  |         | 0.88  |
| 0.43  |         | 0.12  |

|       |         |       |
|-------|---------|-------|
| 2.21  | 504.00  | 7.14  |
| 1.55  | 299.00  | 7.36  |
| 6.73  | 4352.00 | 11.58 |
| 2.31  | 4193.00 | 13.93 |
| 11.72 | 4926.00 | 21.95 |
| 5.59  | 3306.00 | 18.85 |

|          |     |                        |                    | <u>cell_ct</u> | <u>percent inf</u> | <u>Abs Devtn</u> |
|----------|-----|------------------------|--------------------|----------------|--------------------|------------------|
| 50060.00 | A02 | M-021105- hypothetic   | 55101.00 FLJ10241  | 2276.00        | 0.83               | 2.48             |
| 50060.00 | A04 | M-020782- ribonuclea   | 54913.00 RPP25     | 1360.00        | 0.96               | 2.35             |
| 50060.00 | A05 | M-018088- phosphatid   | 54872.00 PIGG      | 2230.00        | 1.57               | 1.74             |
| 50060.00 | A06 | M-021083- hypothetic   | 55073.00 FLJ10120  | 1359.00        | 2.94               | 0.37             |
| 50060.00 | A07 | M-015134- palmdelphi   | 54873.00 PALMD     | 1813.00        | 0.61               | 2.70             |
| 50060.00 | A08 | M-021031- chromoson    | 55049.00 C19orf60  | 2599.00        | 10.66              | 7.35             |
| 50060.00 | A09 | M-020718- formin binc  | 54874.00 FNBP1L    | 943.00         | 0.53               | 2.78             |
| 50060.00 | A10 | M-016321- WD repeat    | 55100.00 WDR70     | 1462.00        | 0.82               | 2.49             |
| 50060.00 | A11 | M-020720- chromoson    | 54875.00 C9orf39   | 722.00         | 1.25               | 2.06             |
| 50060.00 | A12 | M-021103- hypothetic   | 55099.00 FLJ10232  | 372.00         | 1.08               | 2.23             |
| 50060.00 | A13 | M-020725- chromoson    | 54876.00 C4orf30   | 933.00         | 2.14               | 1.17             |
| 50060.00 | A14 | M-018141- hypothetic   | 55096.00 FLJ10213  | 1724.00        | 2.38               | 0.93             |
| 50060.00 | A15 | M-027338- zinc finger, | 54877.00 ZCCHC2    | 1491.00        | 2.82               | 0.49             |
| 50060.00 | A16 | M-023688- sterile alph | 55095.00 SAMD4B    | 841.00         | 3.69               | 0.38             |
| 50060.00 | A17 | M-005855- dipeptidyl-  | 54878.00 DPP8      | 660.00         | 3.79               | 0.48             |
| 50060.00 | A18 | M-016826- G patch do   | 55094.00 GPATCH1   | 938.00         | 5.01               | 1.70             |
| 50060.00 | A19 | M-004584- BCL6 co-rej  | 54880.00 BCOR      | 351.00         | 9.97               | 6.66             |
| 50060.00 | A20 | M-021102- chromoson    | 55093.00 C8orf32   | 1289.00        | 3.34               | 0.03             |
| 50060.00 | A21 | M-020741- testis expr  | 54881.00 TEX10     | 817.00         | 8.08               | 4.77             |
| 50060.00 | A23 | M-014405- ankyrin rep  | 54882.00 ANKHD1    | 1855.00        | 9.06               | 5.75             |
| 50060.00 | B02 | M-021239- chromoson    | 55317.00 C20orf29  | 892.00         | 0.45               | 2.86             |
| 50060.00 | B04 | M-021241- radical S-ac | 55316.00 RSAD1     | 2608.00        | 0.35               | 2.96             |
| 50060.00 | B05 | M-016822- chromoson    | 55102.00 C14orf103 | 3848.00        | 0.39               | 2.92             |
| 50060.00 | B06 | M-007507- solute carri | 55315.00 SLC29A3   | 2506.00        | 0.96               | 2.35             |
| 50060.00 | B07 | M-021106- FLJ10246     | 55104.00 FLJ10246  | 4288.00        | 0.21               | 3.10             |
| 50060.00 | B08 | M-021260- transmemk    | 55314.00 TMEM144   | 2698.00        | 0.67               | 2.64             |
| 50060.00 | B09 | M-021111- G patch do   | 55105.00 GPATCH2   | 2141.00        | 0.56               | 2.75             |
| 50060.00 | B10 | M-021262- hypothetic   | 55313.00 FLJ11151  | 1945.00        | 1.08               | 2.23             |
| 50060.00 | B11 | M-018142- schlafen fa  | 55106.00 SLFN12    | 3251.00        | 1.14               | 2.17             |
| 50060.00 | B12 | M-021317- zinc finger  | 55311.00 ZNF444    | 3032.00        | 0.40               | 2.91             |
| 50060.00 | B13 | M-027200- transmemk    | 55107.00 TMEM16A   | 3884.00        | 1.08               | 2.23             |
| 50060.00 | B14 | M-015868- DEAD (Asp-   | 55308.00 DDX19A    | 2169.00        | 0.69               | 2.62             |
| 50060.00 | B15 | M-018143- BSD domai    | 55108.00 BSDC1     | 3131.00        | 2.43               | 0.88             |
| 50060.00 | B16 | M-010286- serine paln  | 55304.00 SPTLC3    | 1978.00        | 0.35               | 2.96             |
| 50060.00 | B17 | M-016706- mago-nash    | 55110.00 FLJ10292  | 2222.00        | 0.50               | 2.81             |
| 50060.00 | B18 | M-019267- GTPase, IM   | 55303.00 GIMAP4    | 2203.00        | 0.45               | 2.86             |
| 50060.00 | B19 | M-021132- pleckstrin f | 55111.00 PLEKHJ1   | 3408.00        | 1.58               | 1.73             |
| 50060.00 | B20 | M-015372- brix domai   | 55299.00 BXDC2     | 2375.00        | 0.46               | 2.85             |
| 50060.00 | B21 | M-016701- WD repeat    | 55112.00 WDR60     | 3472.00        | 3.46               | 0.15             |
| 50060.00 | B23 | M-015745- XK, Kell blo | 55113.00 XKR8      | 2706.00        | 0.52               | 2.79             |
| 50060.00 | C02 | M-021099- transmemk    | 55092.00 TMEM51    | 3187.00        | 2.20               | 1.11             |
| 50060.00 | C04 | M-013356- mediator o   | 55090.00 MED9      | 2725.00        | 3.23               | 0.08             |
| 50060.00 | C05 | M-016097- coiled-coil  | 54883.00 CCDC49    | 2563.00        | 3.20               | 0.11             |
| 50060.00 | C06 | M-007561- solute carri | 55089.00 SLC38A4   | 2876.00        | 2.89               | 0.42             |
| 50060.00 | C07 | M-018094- retinol satu | 54884.00 RETSAT    | 2410.00        | 4.94               | 1.63             |
| 50060.00 | C08 | M-019131- chromoson    | 55088.00 C10orf118 | 3387.00        | 7.35               | 4.04             |



|              |                         |                    |         |       |      |
|--------------|-------------------------|--------------------|---------|-------|------|
| 50060.00 C09 | M-020747- TBC1 doma     | 54885.00 TBC1D8B   | 2463.00 | 5.44  | 2.13 |
| 50060.00 C10 | M-014634- chromoson     | 55086.00 CXorf57   | 2685.00 | 6.26  | 2.95 |
| 50060.00 C11 | M-020752- plasticity re | 54886.00 RP11-35N6 | 2322.00 | 2.89  | 0.42 |
| 50060.00 C12 | M-021094- sine oculis   | 55084.00 SOBP      | 2254.00 | 2.93  | 0.38 |
| 50060.00 C13 | M-013360- chromoson     | 54887.00 C6orf107  | 2379.00 | 3.74  | 0.43 |
| 50060.00 C14 | M-022129- kinesin far   | 55083.00 KIF26B    | 1754.00 | 4.45  | 1.14 |
| 50060.00 C15 | M-018217- NOL1/NOP      | 54888.00 NSUN2     | 1618.00 | 2.84  | 0.47 |
| 50060.00 C16 | M-021093- hypothetic    | 55082.00 FLJ10154  | 1839.00 | 10.11 | 6.80 |
| 50060.00 C17 | M-004281- alkB, alkyla  | 54890.00 ALKBH5    | 2005.00 | 8.73  | 5.42 |
| 50060.00 C18 | M-004021- TAP bindin    | 55080.00 TAPBPL    | 1298.00 | 3.54  | 0.23 |
| 50060.00 C19 | M-020757- hypothetic    | 54891.00 FLJ20309  | 2311.00 | 6.79  | 3.48 |
| 50060.00 C20 | M-016985- FEZ family :  | 55079.00 FEZF2     | 3688.00 | 12.12 | 8.81 |
| 50060.00 C21 | M-018283- non-SMC c     | 54892.00 NCAPG2    | 2580.00 | 6.28  | 2.97 |
| 50060.00 C23 | M-020758- myotubula     | 54893.00 MTMR10    | 1908.00 | 4.45  | 1.14 |
| 50060.00 D02 | M-007011- ring finger   | 55298.00 RNF121    | 2725.00 | 3.93  | 0.62 |
| 50060.00 D04 | M-018638- coiled-coil   | 55297.00 CCDC91    | 3579.00 | 3.13  | 0.18 |
| 50060.00 D05 | M-008335- Rho GTPas     | 55114.00 ARHGAP17  | 2920.00 | 5.31  | 2.00 |
| 50060.00 D06 | M-020732- TBC1 doma     | 55296.00 TBC1D19   | 2752.00 | 2.22  | 1.09 |
| 50060.00 D07 | M-021133- transmemt     | 55116.00 TMEM39B   | 2110.00 | 4.64  | 1.33 |
| 50060.00 D08 | M-020312- kelch-like 2  | 55295.00 KLHL26    | 1915.00 | 2.92  | 0.39 |
| 50060.00 D09 | M-007373- solute carri  | 55117.00 SLC6A15   | 2209.00 | 4.84  | 1.53 |
| 50060.00 D10 | M-014646- SAPS doma     | 55291.00 SAPS3     | 3109.00 | 3.38  | 0.07 |
| 50060.00 D11 | M-009527- cartilage ac  | 55118.00 CRTAC1    | 3751.00 | 2.45  | 0.86 |
| 50060.00 D12 | M-010365- ras homolc    | 55288.00 RHOT1     | 2726.00 | 3.01  | 0.30 |
| 50060.00 D13 | M-021143- PRP38 pre-    | 55119.00 PRPF38B   | 2733.00 | 1.39  | 1.92 |
| 50060.00 D14 | M-017988- transmemt     | 55287.00 TMEM40    | 2462.00 | 1.02  | 2.29 |
| 50060.00 D15 | M-021486- Fanconi an    | 55120.00 FANCL     | 1866.00 | 1.07  | 2.24 |
| 50060.00 D16 | M-021257- chromoson     | 55286.00 C4orf19   | 2926.00 | 3.35  | 0.04 |
| 50060.00 D17 | M-031863- chromoson     | 55122.00 C6orf166  | 1912.00 | 1.15  | 2.16 |
| 50060.00 D18 | M-020984- RNA bindin    | 55285.00 RBM41     | 2872.00 | 1.25  | 2.06 |
| 50060.00 D19 | M-032250- centrosom     | 55125.00 CEP192    | 2998.00 | 2.37  | 0.94 |
| 50060.00 D20 | M-017987- leucine rich  | 55282.00 LRRC36    | 2319.00 | 3.02  | 0.29 |
| 50060.00 D21 | M-015939- HEAT repe     | 55127.00 HEATR1    | 1914.00 | 0.63  | 2.68 |
| 50060.00 D23 | M-007007- tripartite r  | 55128.00 TRIM68    | 1923.00 | 0.36  | 2.95 |
| 50060.00 E02 | M-013795- uveal auto    | 55075.00 UACA      | 2995.00 | 2.50  | 0.81 |
| 50060.00 E04 | M-017698- oxidation r   | 55074.00 OXR1      | 3505.00 | 2.97  | 0.34 |
| 50060.00 E05 | M-007004- ring finger   | 54894.00 RNF43     | 2115.00 | 4.44  | 1.13 |
| 50060.00 E06 | M-021078- chromoson     | 55071.00 C9orf40   | 1668.00 | 1.92  | 1.39 |
| 50060.00 E07 | M-020760- PQ loop rej   | 54896.00 PQLC2     | 1667.00 | 1.20  | 2.11 |
| 50060.00 E08 | M-019393- de-etiolate   | 55070.00 DET1      | 1299.00 | 2.85  | 0.46 |
| 50060.00 E09 | M-020764- castor zinc   | 54897.00 CASZ1     | 2569.00 | 2.26  | 1.05 |
| 50060.00 E10 | M-018206- chromoson     | 55069.00 C7orf42   | 2316.00 | 2.89  | 0.42 |
| 50060.00 E11 | M-009531- elongation    | 54898.00 ELOVL2    | 2830.00 | 2.51  | 0.80 |
| 50060.00 E12 | M-021077- ecto-NOX c    | 55068.00 ENOX1     | 2908.00 | 2.68  | 0.63 |
| 50060.00 E13 | M-020771- lymphocyte    | 54900.00 LAX1      | 1504.00 | 1.80  | 1.51 |
| 50060.00 E14 | M-021074- chromoson     | 55064.00 C9orf68   | 1729.00 | 0.98  | 2.33 |
| 50060.00 E15 | M-020772- CDK5 regul    | 54901.00 CDKAL1    | 1574.00 | 1.40  | 1.91 |

|              |                        |                    |         |       |      |
|--------------|------------------------|--------------------|---------|-------|------|
| 50060.00 E16 | M-016988- zinc finger, | 55063.00 ZCWPW1    | 2497.00 | 2.72  | 0.59 |
| 50060.00 E17 | M-020774- Meckel syn   | 54903.00 MKS1      | 881.00  | 2.16  | 1.15 |
| 50060.00 E18 | M-018205- WD repeat    | 55062.00 WIP1      | 1347.00 | 0.37  | 2.94 |
| 50060.00 E19 | M-009395- cytochrom    | 54905.00 CYP2W1    | 3274.00 | 1.10  | 2.21 |
| 50060.00 E20 | M-021072- sushi doma   | 55061.00 SUSD4     | 3267.00 | 1.62  | 1.69 |
| 50060.00 E21 | M-016970- coiled-coil  | 54908.00 CCDC99    | 3285.00 | 2.13  | 1.18 |
| 50060.00 E23 | M-015364- sema doma    | 54910.00 SEMA4C    | 2100.00 | 1.43  | 1.88 |
| 50060.00 F02 | M-020874- transmemt    | 55281.00 TMEM140   | 2629.00 | 1.86  | 1.45 |
| 50060.00 F04 | M-016322- CWF19-like   | 55280.00 CWF19L1   | 2081.00 | 2.55  | 0.76 |
| 50060.00 F05 | M-017701- transmemt    | 55129.00 TMEM16K   | 1948.00 | 5.34  | 2.03 |
| 50060.00 F06 | M-020800- zinc finger  | 55279.00 ZNF654    | 2615.00 | 2.79  | 0.52 |
| 50060.00 F07 | M-013357- armadillo r  | 55130.00 ARMC4     | 1981.00 | 3.23  | 0.08 |
| 50060.00 F08 | M-010132- glutaminyl-  | 55278.00 QRSL1     | 1186.00 | 3.29  | 0.02 |
| 50060.00 F09 | M-021145- RNA bindin   | 55131.00 RBM28     | 3515.00 | 11.12 | 7.81 |
| 50060.00 F10 | M-020785- phosphogl    | 55276.00 PGM2      | 2693.00 | 5.76  | 2.45 |
| 50060.00 F11 | M-013350- La ribonucl  | 55132.00 LARP2     | 2602.00 | 2.00  | 1.31 |
| 50060.00 F12 | M-017048- vacuolar pr  | 55275.00 VPS53     | 2005.00 | 4.79  | 1.48 |
| 50060.00 F13 | M-018144- S1 RNA bin   | 55133.00 SRBD1     | 1678.00 | 5.42  | 2.11 |
| 50060.00 F14 | M-013349- PHD finger   | 55274.00 PHF10     | 1909.00 | 10.58 | 7.27 |
| 50060.00 F15 | M-021146- WD repeat    | 55135.00 WDR79     | 1442.00 | 1.46  | 1.85 |
| 50060.00 F16 | M-020645- transmemt    | 55273.00 TMEM100   | 2133.00 | 3.00  | 0.31 |
| 50060.00 F17 | M-010934- fidgetin     | 55137.00 FIGN      | 2597.00 | 6.55  | 3.24 |
| 50060.00 F18 | M-013348- IMP3, U3 s   | 55272.00 IMP3      | 3179.00 | 2.93  | 0.38 |
| 50060.00 F19 | M-021150- family with  | 55138.00 FAM90A1   | 2026.00 | 2.76  | 0.55 |
| 50060.00 F20 | M-020621- nudix (nucl  | 55270.00 NUDT15    | 1801.00 | 5.33  | 2.02 |
| 50060.00 F21 | M-021152- ankyrin rep  | 55139.00 ANKZF1    | 830.00  | 0.84  | 2.47 |
| 50060.00 F23 | M-015940- elongation   | 55140.00 ELP3      | 2237.00 | 0.36  | 2.95 |
| 50060.00 G02 | M-019377- Zwilch, kin  | 55055.00 ZWILCH    | 2940.00 | 1.97  | 1.34 |
| 50060.00 G04 | M-021033- ATG16 aut    | 55054.00 ATG16L1   | 3632.00 | 2.12  | 1.19 |
| 50060.00 G05 | M-015365- KIAA1797     | 54914.00 KIAA1797  | 2427.00 | 2.88  | 0.43 |
| 50060.00 G06 | M-017564- mitochond    | 55052.00 MRPL20    | 2221.00 | 0.77  | 2.54 |
| 50060.00 G07 | M-018095- YTH domai    | 54915.00 YTHDF1    | 4060.00 | 7.17  | 3.86 |
| 50060.00 G08 | M-013794- chromoson    | 55051.00 C14orf102 | 2924.00 | 2.60  | 0.71 |
| 50060.00 G09 | M-020793- chromoson    | 54916.00 C14orf101 | 2775.00 | 2.31  | 1.00 |
| 50060.00 G10 | M-018204- vacuolar pr  | 55048.00 VPS37C    | 1091.00 | 0.55  | 2.76 |
| 50060.00 G11 | M-010711- CKLF-like N  | 54918.00 CMTM6     | 3528.00 | 1.53  | 1.78 |
| 50060.00 G12 | M-021012- pleckstrin t | 55041.00 PLEKHB2   | 3539.00 | 1.84  | 1.47 |
| 50060.00 G13 | M-018096- HEAT repe    | 54919.00 HEATR2    | 2635.00 | 1.18  | 2.13 |
| 50060.00 G14 | M-021006- epsin 3      | 55040.00 EPN3      | 2472.00 | 0.40  | 2.91 |
| 50060.00 G15 | M-017059- dihydrouric  | 54920.00 DUS2L     | 2515.00 | 4.93  | 1.62 |
| 50060.00 G16 | M-021001- tRNA meth    | 55039.00 TRMT12    | 2768.00 | 0.94  | 2.37 |
| 50060.00 G17 | M-020794- Ras interac  | 54922.00 RASIP1    | 2441.00 | 0.66  | 2.65 |
| 50060.00 G18 | M-016957- Pentatricop  | 55037.00 PTCD3     | 3238.00 | 0.86  | 2.45 |
| 50060.00 G19 | M-020797- Lck interac  | 54923.00 LIME1     | 3550.00 | 2.62  | 0.69 |
| 50060.00 G20 | M-030953- coiled-coil  | 55036.00 CCDC40    | 2514.00 | 1.67  | 1.64 |
| 50060.00 G21 | M-018838- zinc finger  | 54925.00 ZNF434    | 3281.00 | 0.73  | 2.58 |
| 50060.00 G23 | M-020803- coiled-coil- | 54927.00 CHCHD3    | 1820.00 | 0.49  | 2.82 |

|                     |                            |                 |              |                |              |              |
|---------------------|----------------------------|-----------------|--------------|----------------|--------------|--------------|
| 50060.00 H02        | M-020596- paraspeckl       | 55269.00        | PSPC1        | 2224.00        | 0.99         | 2.32         |
| 50060.00 H04        | M-010013- enoyl Coen       | 55268.00        | ECHDC2       | 2541.00        | 0.91         | 2.40         |
| 50060.00 H05        | M-021161- centrosom        | 55142.00        | CEP27        | 1698.00        | 2.06         | 1.25         |
| 50060.00 H06        | M-016459- transmemk        | 55266.00        | TMEM19       | 2110.00        | 0.28         | 3.03         |
| 50060.00 H07        | M-021163- cell divisio     | 55143.00        | CDCA8        | 799.00         | 4.01         | 0.70         |
| 50060.00 H08        | M-020225- chromoson        | 55264.00        | C21orf77     | 3304.00        | 3.45         | 0.14         |
| 50060.00 H09        | M-015747- leucine ric      | 55144.00        | LRRC8D       | 3288.00        | 1.82         | 1.49         |
| 50060.00 H10        | M-016464- chromoson        | 55262.00        | C7orf43      | 2681.00        | 0.71         | 2.60         |
| 50060.00 H11        | M-021313- THAP doma        | 55145.00        | THAP1        | 2445.00        | 1.51         | 1.80         |
| 50060.00 H12        | M-018806- transmemk        | 55260.00        | TMEM143      | 3358.00        | 2.00         | 1.31         |
| 50060.00 H13        | M-016699- zinc finger,     | 55146.00        | ZDHHC4       | 1687.00        | 1.13         | 2.18         |
| 50060.00 H14        | M-027150- cancer susc      | 55259.00        | CASC1        | 2302.00        | 0.52         | 2.79         |
| 50060.00 H15        | M-016689- RNA bindin       | 55147.00        | RBM23        | 4679.00        | 2.27         | 1.04         |
| 50060.00 H16        | M-020368- hypothetic       | 55258.00        | FLJ10916     | 1954.00        | 0.72         | 2.59         |
| 50060.00 H17        | M-016489- chromoson        | 55148.00        | C14orf130    | 2847.00        | 0.67         | 2.64         |
| 50060.00 H18        | M-006381- chromoson        | 55257.00        | C20orf20     | 1778.00        | 0.45         | 2.86         |
| 50060.00 H19        | M-016486- PAP associ       | 55149.00        | PAPD1        | 2594.00        | 0.93         | 2.38         |
| 50060.00 H20        | M-020394- acireducto       | 55256.00        | ADI1         | 1749.00        | 0.23         | 3.08         |
| 50060.00 H21        | M-021165- hypothetic       | 55150.00        | FLJ10490     | 2906.00        | 1.20         | 2.11         |
| 50060.00 H23        | M-021168- transmemk        | 55151.00        | TMEM38B      | 2579.00        | 0.74         | 2.57         |
| 50060.00 I02        | M-016976- nucleolar p      | 55035.00        | NOL8         | 2052.00        | 2.19         | 1.12         |
| 50060.00 I04        | M-007541- solute carri     | 55032.00        | SLC35A5      | 1383.00        | 5.71         | 2.40         |
| 50060.00 I05        | M-020806- transmemk        | 54929.00        | TMEM161      | 3106.00        | 7.47         | 4.16         |
| 50060.00 I06        | M-006093- ubiquitin s      | 55031.00        | USP47        | 3587.00        | 4.96         | 1.65         |
| 50060.00 I07        | M-020807- chromoson        | 54930.00        | C14orf94     | 1774.00        | 2.20         | 1.11         |
| 50060.00 I08        | M-020989- F-box prote      | 55030.00        | FBXO34       | 3015.00        | 4.54         | 1.23         |
| 50060.00 I09        | M-020813- RNA (guani       | 54931.00        | RG9MTD1      | 2554.00        | 3.60         | 0.29         |
| 50060.00 I10        | M-016959- chromoson        | 55028.00        | C17orf80     | 3176.00        | 8.75         | 5.44         |
| 50060.00 I11        | M-018097- hypothetic       | 54932.00        | FLJ20433     | 4470.00        | 5.46         | 2.15         |
| 50060.00 I12        | M-020982- HEAT repe        | 55027.00        | HEATR3       | 2558.00        | 1.84         | 1.47         |
| 50060.00 I13        | M-006028- rhomboid,        | 54933.00        | RHBDL2       | 1863.00        | 0.43         | 2.88         |
| 50060.00 I14        | M-018099- family with      | 55026.00        | FAM70A       | 2549.00        | 3.53         | 0.22         |
| 50060.00 I15        | M-020816- chromoson        | 54934.00        | C12orf41     | 1827.00        | 1.15         | 2.16         |
| 50060.00 I16        | M-019168- B-cell scaff     | 55024.00        | BANK1        | 2534.00        | 2.92         | 0.39         |
| 50060.00 I17        | M-020823- spermatog        | 54937.00        | SOHLH2       | 2148.00        | 2.70         | 0.61         |
| 50060.00 I18        | M-018934- phosphoty        | 55022.00        | PID1         | 3559.00        | 5.14         | 1.83         |
| 50060.00 I19        | M-016311- seryl-tRNA       | 54938.00        | SARS2        | 3044.00        | 3.06         | 0.25         |
| 50060.00 I20        | M-020975- hypothetic       | 55020.00        | FLJ20699     | 3794.00        | 7.04         | 3.73         |
| 50060.00 I21        | M-016966- COMM dor         | 54939.00        | COMMD4       | 2775.00        | 4.94         | 1.63         |
| 50060.00 I23        | M-020825- OCIA doma        | 54940.00        | OCIAD1       | 2901.00        | 2.72         | 0.59         |
| <b>50060.00 J02</b> | <b>M-020405- WD repeat</b> | <b>55255.00</b> | <b>WDR41</b> | <b>3710.00</b> | <b>13.72</b> | <b>10.41</b> |
| 50060.00 J04        | M-020434- transmemk        | 55254.00        | TMEM39A      | 2196.00        | 18.58        | 15.27        |
| 50060.00 J05        | M-015807- DALR antic       | 55152.00        | DALRD3       | 2960.00        | 11.69        | 8.38         |
| 50060.00 J06        | M-020515- tRNA-γW s        | 55253.00        | TYW1         | 3614.00        | 9.30         | 5.99         |
| 50060.00 J07        | M-021169- SDA1 doma        | 55153.00        | SDAD1        | 1995.00        | 15.84        | 12.53        |
| 50060.00 J08        | M-022638- additional       | 55252.00        | ASXL2        | 2373.00        | 13.11        | 9.80         |

|              |                        |          |           |         |       |       |
|--------------|------------------------|----------|-----------|---------|-------|-------|
| 50060.00 J09 | M-021170- misato hon   | 55154.00 | MSTO1     | 3075.00 | 9.89  | 6.58  |
| 50060.00 J10 | M-021138- protein-L-is | 55251.00 | PCMTD2    | 1892.00 | 13.58 | 10.27 |
| 50060.00 J11 | M-020492- aspartyl-tR  | 55157.00 | DARS2     | 3029.00 | 15.09 | 11.78 |
| 50060.00 J12 | M-021036- chromosom    | 55248.00 | C1orf75   | 1701.00 | 17.52 | 14.21 |
| 50060.00 J13 | M-017095- ring finger  | 55159.00 | RFWD3     | 904.00  | 17.48 | 14.17 |
| 50060.00 J14 | M-020939- nei endonu   | 55247.00 | NEIL3     | 2546.00 | 10.21 | 6.90  |
| 50060.00 J15 | M-017096- Rho guanin   | 55160.00 | ARHGEF10I | 2787.00 | 5.96  | 2.65  |
| 50060.00 J16 | M-020869- coiled-coil  | 55246.00 | CCDC25    | 2637.00 | 10.16 | 6.85  |
| 50060.00 J17 | M-020386- transmemk    | 55161.00 | TMEM33    | 1977.00 | 3.44  | 0.13  |
| 50060.00 J18 | M-013347- solute carri | 55244.00 | SLC47A1   | 2933.00 | 5.35  | 2.04  |
| 50060.00 J19 | M-009715- pyridoxami   | 55163.00 | PNPO      | 4134.00 | 10.14 | 6.83  |
| 50060.00 J20 | M-019453- kin of IRRE  | 55243.00 | KIRREL    | 2828.00 | 6.51  | 3.20  |
| 50060.00 J21 | M-020737- SHQ1 homi    | 55164.00 | SHQ1      | 3398.00 | 9.71  | 6.40  |
| 50060.00 J23 | M-006893- centrosom    | 55165.00 | CEP55     | 2578.00 | 9.50  | 6.19  |
| 50060.00 K02 | M-020969- chromosom    | 55018.00 | C17orf73  | 1652.00 | 13.62 | 10.31 |
| 50060.00 K04 | M-021301- chromosom    | 55017.00 | C14orf119 | 3712.00 | 14.36 | 11.05 |
| 50060.00 K05 | M-007005- ring finger  | 54941.00 | RNF125    | 2835.00 | 12.91 | 9.60  |
| 50060.00 K06 | M-007006- membrane     | 55016.00 | MARCH1    | 3302.00 | 11.75 | 8.44  |
| 50060.00 K07 | M-016099- chromosom    | 54942.00 | C9orf6    | 2815.00 | 5.79  | 2.48  |
| 50060.00 K08 | M-021324- PRP39 pre-   | 55015.00 | PRPF39    | 3448.00 | 15.31 | 12.00 |
| 50060.00 K09 | M-021397- chromosom    | 54943.00 | C21orf55  | 2556.00 | 4.69  | 1.38  |
| 50060.00 K10 | M-020965- syntaxin 17  | 55014.00 | STX17     | 3530.00 | 7.39  | 4.08  |
| 50060.00 K11 | M-007330- solute carri | 54946.00 | SLC41A3   | 3232.00 | 8.76  | 5.45  |
| 50060.00 K12 | M-016108- coiled-coil  | 55013.00 | CCDC109B  | 2344.00 | 9.90  | 6.59  |
| 50060.00 K13 | M-010285- acyltransfe  | 54947.00 | AYTL1     | 2495.00 | 2.65  | 0.66  |
| 50060.00 K14 | M-018203- protein phc  | 55012.00 | PPP2R3C   | 2790.00 | 3.80  | 0.49  |
| 50060.00 K15 | M-013354- mitochond    | 54948.00 | MRPL16    | 2212.00 | 3.03  | 0.28  |
| 50060.00 K16 | M-020963- PIH1 doma    | 55011.00 | PIH1D1    | 3301.00 | 2.61  | 0.70  |
| 50060.00 K17 | M-020834- chromosom    | 54949.00 | C11orf79  | 2189.00 | 1.32  | 1.99  |
| 50060.00 K18 | M-020943- chromosom    | 55010.00 | C12orf48  | 2672.00 | 1.83  | 1.48  |
| 50060.00 K19 | M-018218- COMM dor     | 54951.00 | COMMD8    | 3370.00 | 1.96  | 1.35  |
| 50060.00 K20 | M-020936- chromosom    | 55009.00 | C19orf24  | 4040.00 | 5.22  | 1.91  |
| 50060.00 K21 | M-018098- tRNA selen   | 54952.00 | TRSPAP1   | 3934.00 | 7.65  | 4.34  |
| 50060.00 K23 | M-010667- chromosom    | 54953.00 | C1orf27   | 2357.00 | 1.87  | 1.44  |
| 50060.00 L02 | M-021197- 2-oxogluta   | 55239.00 | OGFOD1    | 3106.00 | 10.43 | 7.12  |
| 50060.00 L04 | M-007328- amino acid   | 55238.00 | FLJ10815  | 4110.00 | 6.57  | 3.26  |
| 50060.00 L05 | M-020768- centromeri   | 55166.00 | CENPQ     | 3031.00 | 9.67  | 6.36  |
| 50060.00 L06 | M-021159- chromosom    | 55237.00 | C14orf115 | 1776.00 | 4.05  | 0.74  |
| 50060.00 L07 | M-020828- male-speci   | 55167.00 | MSL2L1    | 2413.00 | 7.67  | 4.36  |
| 50060.00 L08 | M-006403- ubiquitin-a  | 55236.00 | UBE1L2    | 1776.00 | 6.19  | 2.88  |
| 50060.00 L09 | M-007008- mitochond    | 55168.00 | MRPS18A   | 3420.00 | 9.06  | 5.75  |
| 50060.00 L10 | M-021129- smu-1 sup    | 55234.00 | SMU1      | 557.00  | 14.54 | 11.23 |
| 50060.00 L11 | M-007773- protein arg  | 55170.00 | PRMT6     | 2687.00 | 7.59  | 4.28  |
| 50060.00 L12 | M-021097- MOB1, Mp     | 55233.00 | MOBK1B    | 3127.00 | 6.59  | 3.28  |
| 50060.00 L13 | M-020887- TBCC doma    | 55171.00 | TBCCD1    | 2892.00 | 5.71  | 2.40  |
| 50060.00 L14 | M-021023- coiled-coil  | 55231.00 | CCDC87    | 2331.00 | 2.49  | 0.82  |
| 50060.00 L15 | M-020906- chromosom    | 55172.00 | C14orf104 | 1417.00 | 1.62  | 1.69  |

|              |                        |                   |         |       |       |
|--------------|------------------------|-------------------|---------|-------|-------|
| 50060.00 L16 | M-006088- ubiquitin sp | 55230.00 USP40    | 1745.00 | 2.46  | 0.85  |
| 50060.00 L17 | M-013345- mitochond    | 55173.00 MRPS10   | 2085.00 | 2.49  | 0.82  |
| 50060.00 L18 | M-021021- hypothetic   | 55228.00 FLJ10781 | 4264.00 | 6.14  | 2.83  |
| 50060.00 L19 | M-020921- integrator   | 55174.00 INTS10   | 2598.00 | 4.23  | 0.92  |
| 50060.00 L20 | M-010668- leucine ric  | 55227.00 LRRC1    | 3389.00 | 4.43  | 1.12  |
| 50060.00 L21 | M-020928- kelch-like 1 | 55175.00 KLHL11   | 2731.00 | 6.15  | 2.84  |
| 50060.00 L23 | M-013628- Sec61 alph   | 55176.00 SEC61A2  | 1304.00 | 2.99  | 0.32  |
| 50060.00 M02 | M-020931- family with  | 55007.00 FAM118A  | 2142.00 | 3.92  | 0.61  |
| 50060.00 M04 | M-012966- hypothetic   | 55006.00 FLJ20628 | 2916.00 | 2.74  | 0.57  |
| 50060.00 M05 | M-032024- family with  | 54954.00 FAM120C  | 2719.00 | 2.02  | 1.29  |
| 50060.00 M06 | M-020923- required fo  | 55005.00 RMND1    | 1876.00 | 2.03  | 1.28  |
| 50060.00 M07 | M-020836- chromoson    | 54955.00 C1orf109 | 2793.00 | 6.12  | 2.81  |
| 50060.00 M08 | M-020916- chromoson    | 55004.00 C11orf59 | 1596.00 | 4.45  | 1.14  |
| 50060.00 M09 | M-020837- poly (ADP-i  | 54956.00 PARP16   | 2703.00 | 6.22  | 2.91  |
| 50060.00 M10 | M-020912- PAK1 inter   | 55003.00 PAK1IP1  | 2554.00 | 5.01  | 1.70  |
| 50060.00 M11 | M-020838- thioredoxir  | 54957.00 TXNL4B   | 3789.00 | 5.36  | 2.05  |
| 50060.00 M12 | M-020908- transmemk    | 55002.00 TMCO3    | 2947.00 | 7.97  | 4.66  |
| 50060.00 M13 | M-020840- transmemk    | 54958.00 TMEM160  | 1569.00 | 5.48  | 2.17  |
| 50060.00 M14 | M-020902- tetratricop  | 55001.00 TTC22    | 2776.00 | 3.13  | 0.18  |
| 50060.00 M15 | M-016965- odontogen    | 54959.00 ODAM     | 2686.00 | 5.06  | 1.75  |
| 50060.00 M16 | M-018202- taurine upr  | 55000.00 TUG1     | 2672.00 | 2.69  | 0.62  |
| 50060.00 M17 | M-020841- gem (nucle   | 54960.00 GEMIN8   | 3009.00 | 4.65  | 1.34  |
| 50060.00 M18 | M-020896- tescalcin    | 54997.00 TESC     | 3429.00 | 5.37  | 2.06  |
| 50060.00 M19 | M-020843- TIMELESS ii  | 54962.00 TIPIN    | 3205.00 | 12.48 | 9.17  |
| 50060.00 M20 | M-018689- MOCO sulp    | 54996.00 MOSC2    | 2868.00 | 6.94  | 3.63  |
| 50060.00 M21 | M-016312- chromoson    | 54964.00 C1orf56  | 3408.00 | 7.98  | 4.67  |
| 50060.00 M23 | M-013784- phosphatid   | 54965.00 PIGX     | 2744.00 | 7.94  | 4.63  |
| 50060.00 N02 | M-014402- N-acetyltra  | 55226.00 NAT10    | 3823.00 | 11.82 | 8.51  |
| 50060.00 N04 | M-027483- ribonucleo   | 55225.00 RAVR2    | 1835.00 | 11.06 | 7.75  |
| 50060.00 N05 | M-020973- family with  | 55177.00 FAM82C   | 2968.00 | 6.00  | 2.69  |
| 50060.00 N06 | M-007010- tripartite r | 55223.00 TRIM62   | 3616.00 | 5.42  | 2.11  |
| 50060.00 N07 | M-015450- RNA methy    | 55178.00 RNMTL1   | 2873.00 | 7.10  | 3.79  |
| 50060.00 N08 | M-020832- leucine ric  | 55222.00 LRRC20   | 2329.00 | 6.14  | 2.83  |
| 50060.00 N09 | M-019129- lines homo   | 55180.00 LINS1    | 5334.00 | 16.65 | 13.34 |
| 50060.00 N10 | M-020914- kelch doma   | 55220.00 KLHDC8A  | 3531.00 | 15.63 | 12.32 |
| 50060.00 N11 | M-016480- chromoson    | 55181.00 C17orf71 | 4385.00 | 13.23 | 9.92  |
| 50060.00 N12 | M-020899- exonucleas   | 55218.00 EXDL2    | 2231.00 | 13.54 | 10.23 |
| 50060.00 N13 | M-021044- chromoson    | 55182.00 C1orf164 | 2432.00 | 7.61  | 4.30  |
| 50060.00 N14 | M-031958- trimethylly  | 55217.00 TMLHE    | 1738.00 | 5.47  | 2.16  |
| 50060.00 N15 | M-027983- RAP1 inter   | 55183.00 RIF1     | 3428.00 | 6.18  | 2.87  |
| 50060.00 N16 | M-020871- chromoson    | 55216.00 C11orf57 | 3777.00 | 6.33  | 3.02  |
| 50060.00 N17 | M-013129- chromoson    | 55184.00 C20orf12 | 3009.00 | 4.19  | 0.88  |
| 50060.00 N18 | M-022320- Fanconi an   | 55215.00 FANCI    | 3562.00 | 14.88 | 11.57 |
| 50060.00 N19 | M-007327- solute carri | 55186.00 SLC25A36 | 4235.00 | 23.66 | 20.35 |
| 50060.00 N20 | M-004272- leprecan-lil | 55214.00 LEPREL1  | 4944.00 | 5.30  | 1.99  |
| 50060.00 N21 | M-021567- vacuolar pr  | 55187.00 VPS13D   | 3312.00 | 3.29  | 0.02  |
| 50060.00 N23 | M-021081- resistance   | 55188.00 RIC8B    | 2181.00 | 2.98  | 0.33  |

|              |                        |                    |         |       |               |
|--------------|------------------------|--------------------|---------|-------|---------------|
| 50060.00 O02 | M-031860- 3-oxoacyl-   | 54995.00 OXSM      | 2287.00 | 1.97  | 1.34          |
| 50060.00 O04 | M-032154- chromosom    | 54994.00 C2orf11   | 3335.00 | 6.87  | 3.56          |
| 50060.00 O05 | M-020846- chromosom    | 54967.00 CXorf48   | 2442.00 | 4.91  | 1.60          |
| 50060.00 O06 | M-021470- zinc finger  | 54993.00 ZSCAN2    | 1844.00 | 4.72  | 1.41          |
| 50060.00 O07 | M-015366- transmemk    | 54968.00 TMEM70    | 4044.00 | 11.85 | 8.54          |
| 50060.00 O08 | M-027330- chromosom    | 54991.00 C1orf159  | 3121.00 | 8.39  | 5.08          |
| 50060.00 O09 | M-020849- chromosom    | 54969.00 C4orf27   | 2718.00 | 11.04 | 7.73          |
| 50060.00 O10 | M-022215- zinc finger  | 54989.00 ZNF770    | 2183.00 | 3.89  | 0.58          |
| 50060.00 O11 | M-018220- tetratricop  | 54970.00 TTC12     | 2502.00 | 6.04  | 2.73          |
| 50060.00 O12 | M-031212- hypothetic   | 54988.00 FLJ20581  | 2120.00 | 10.09 | 6.78          |
| 50060.00 O13 | M-019041- transmemk    | 54972.00 TMEM132/  | 2072.00 | 4.92  | 1.61          |
| 50060.00 O14 | M-031916- chromosom    | 54987.00 C1orf123  | 2262.00 | 4.51  | 1.20          |
| 50060.00 O15 | M-013789- cleavage ar  | 54973.00 CPSF3L    | 3535.00 | 5.04  | 1.73          |
| 50060.00 O16 | M-004707- host cell fa | 54985.00 HCFC1R1   | 3326.00 | 5.20  | 1.89          |
| 50060.00 O17 | M-020857- chromosom    | 54976.00 C2orf27   | 2635.00 | 7.89  | 4.58          |
| 50060.00 O18 | M-006722- chromosom    | 54981.00 C9orf95   | 3382.00 | 11.21 | 7.90          |
| 50060.00 O19 | M-007331- solute carri | 54977.00 SLC25A38  | 2264.00 | 9.10  | 5.79          |
| 50060.00 O20 | M-020863- chromosom    | 54980.00 C2orf42   | 1835.00 | 5.18  | 1.87          |
| 50060.00 O21 | M-018201- chromosom    | 54978.00 C2orf18   | 2284.00 | 6.70  | 3.39          |
| 50060.00 O23 | M-020862- HRAS-like s  | 54979.00 HRASLS2   | 1456.00 | 5.29  | 1.98          |
| 50060.00 P02 | M-017098- regulator o  | 55213.00 RCBTB1    | 2568.00 | 3.12  | 0.19          |
| 50060.00 P04 | M-020766- developme    | 55211.00 DPPA4     | 994.00  | 1.31  | 2.00          |
| 50060.00 P05 | M-010039- nudix (nucl  | 55190.00 NUDT11    | 880.00  | 9.20  | 5.89          |
| 50060.00 P06 | M-008191- ATPase fan   | 55210.00 ATAD3A    | 2235.00 | 1.25  | 2.06          |
| 50060.00 P07 | M-007723- NAD synth    | 55191.00 NADSYN1   | 2939.00 | 5.61  | 2.30          |
| 50060.00 P08 | M-028069- SET domair   | 55209.00 SETD5     | 1383.00 | 3.62  | 0.31          |
| 50060.00 P09 | M-021141- DnaJ (Hsp4   | 55192.00 DNAJC17   | 893.00  | 3.81  | 0.50          |
| 50060.00 P10 | M-020261- DCN1, defe   | 55208.00 DCUN1D2   | 627.00  | 0.64  | 2.67          |
| 50060.00 P11 | M-008692- polybromo    | 55193.00 PBRM1     | 1064.00 | 1.13  | 2.18          |
| 50060.00 P12 | M-020294- ADP-ribosy   | 55207.00 ARL8B     | 1468.00 | 3.27  | 0.04          |
| 50060.00 P13 | M-021255- chromosom    | 55194.00 C1orf78   | 1400.00 | 2.64  | 0.67          |
| 50060.00 P14 | M-027143- strawberry   | 55206.00 SBNO1     | 2203.00 | 5.72  | 2.41          |
| 50060.00 P15 | M-020507- chromosom    | 55195.00 C14orf105 | 815.00  | 1.10  | 2.21          |
| 50060.00 P16 | M-007009- zinc finger  | 55205.00 ZNF532    | 1489.00 | 1.07  | 2.24          |
| 50060.00 P17 | M-020502- chromosom    | 55196.00 C12orf35  | 2150.00 | 5.53  | 2.22          |
| 50060.00 P18 | M-006413- golgi phosp  | 55204.00 GOLPH3L   | 1596.00 | 1.19  | 2.12          |
| 50060.00 P19 | M-016272- adaptor pri  | 55198.00 APPL2     | 2147.00 | 2.79  | 0.52          |
| 50060.00 P20 | M-017097- leucine-ric  | 55203.00 LGI2      | 928.00  | 6.25  | 2.94          |
| 50060.00 P21 | M-015922- family with  | 55199.00 FAM86C    | 1607.00 | 4.79  | 1.48          |
| 50060.00 P23 | M-016881- microtubul   | 55201.00 MAP1S     | 2339.00 | 2.35  | 0.96          |
|              |                        | MAD                | 2524.50 | 3.31  | 2.13          |
|              |                        |                    |         |       | 6.38          |
|              |                        |                    |         |       | corrected MAD |
|              |                        |                    |         |       | 3.15          |
| 50060.00 C22 |                        | 2682.00            | 43.89   |       |               |
| 50060.00 D22 |                        | 1857.00            | 8.02    |       |               |
| 50060.00 E22 |                        |                    | 1799.00 | 12.90 |               |
| 50060.00 F22 |                        |                    | 1996.00 | 19.84 |               |

|              |                                   |         |           |         |       |
|--------------|-----------------------------------|---------|-----------|---------|-------|
|              |                                   |         | mn        | 1897.50 | 16.37 |
|              |                                   |         | sd        | 139.30  | 4.91  |
| 50060.00 G22 |                                   |         |           | 374.00  | 0.80  |
| 50060.00 H22 |                                   |         |           | 636.00  | 1.26  |
| 50060.00 I22 |                                   |         |           | 307.00  | 1.63  |
| 50060.00 J22 |                                   | 1053.00 | 4.75      |         |       |
|              |                                   |         | mn        | 471.50  | 1.44  |
|              |                                   |         | sd        | 232.64  | 0.26  |
|              |                                   |         | 3psSD     |         | 14.73 |
|              |                                   |         | 3ngSD     |         | 0.79  |
|              |                                   |         | SumSD     |         | 15.52 |
|              |                                   |         | DiffMn    |         | 14.92 |
|              |                                   |         | SmovrDiff |         | 1.04  |
|              |                                   |         | 1minus    |         | -0.04 |
| 50060.00 G03 | M-003290- polo-like ki            | 5347.00 | PLK1 SMAR | 196.00  | 3.57  |
| 50060.00 H03 | M-003290- polo-like ki            | 5347.00 | PLK1 SMAR | 149.00  | 4.03  |
| 50060.00 I03 | D-001206- siControl non-targetin  |         |           | 2255.00 | 6.21  |
| 50060.00 J03 | D-001206- siControl non-targetin  |         |           | 2282.00 | 16.43 |
| 50060.00 K03 | D-001600- ( siGLO RISC-free siRNA |         |           | 4560.00 | 14.39 |
| 50060.00 L03 | D-001600- ( siGLO RISC-free siRNA |         |           | 4394.00 | 9.13  |



| Robust Z | cell_ct | percent_inf | Abs_Devtn | Robust Z | cell_ct | percent_inf | Abs_Devtn | Robust Z |
|----------|---------|-------------|-----------|----------|---------|-------------|-----------|----------|
| -0.79    | 3828.00 | 5.12        | 1.72      | 0.62     | 2457.00 | 7.12        | 4.98      | 2.99     |
| -0.75    | 1720.00 | 5.93        | 2.53      | 0.91     | 1043.00 | 3.07        | 0.93      | 0.56     |
| -0.55    | 1457.00 | 2.95        | 0.45      | -0.16    | 1158.00 | 4.92        | 2.78      | 1.67     |
| -0.12    | 2043.00 | 7.10        | 3.70      | 1.33     | 1635.00 | 11.99       | 9.85      | 5.91     |
| -0.86    | 1935.00 | 2.64        | 0.76      | -0.27    | 1626.00 | 3.87        | 1.73      | 1.04     |
| 2.34     | 2792.00 | 5.19        | 1.79      | 0.64     | 2366.00 | 5.20        | 3.06      | 1.84     |
| -0.88    | 1166.00 | 4.89        | 1.49      | 0.53     | 678.00  | 3.54        | 1.40      | 0.84     |
| -0.79    | 1219.00 | 7.88        | 4.48      | 1.60     | 984.00  | 5.39        | 3.25      | 1.95     |
| -0.66    | 1703.00 | 8.40        | 5.00      | 1.79     | 1123.00 | 4.45        | 2.31      | 1.39     |
| -0.71    | 449.00  | 4.68        | 1.28      | 0.46     | 233.00  | 1.72        | 0.42      | -0.25    |
| -0.37    | 732.00  | 5.46        | 2.06      | 0.74     | 799.00  | 1.63        | 0.51      | -0.31    |
| -0.30    | 1890.00 | 8.47        | 5.07      | 1.82     | 1478.00 | 6.36        | 4.22      | 2.53     |
| -0.16    | 1982.00 | 10.24       | 6.84      | 2.45     | 1397.00 | 4.08        | 1.94      | 1.16     |
| 0.12     | 495.00  | 11.72       | 8.32      | 2.98     | 453.00  | 3.53        | 1.39      | 0.84     |
| 0.15     | 1436.00 | 5.85        | 2.45      | 0.88     | 960.00  | 1.67        | 0.47      | -0.28    |
| 0.54     | 891.00  | 7.07        | 3.67      | 1.32     | 1459.00 | 3.91        | 1.77      | 1.06     |
| 2.12     | 348.00  | 8.05        | 4.65      | 1.67     | 467.00  | 7.28        | 5.14      | 3.09     |
| 0.01     | 1691.00 | 5.03        | 1.63      | 0.58     | 2737.00 | 5.59        | 3.45      | 2.07     |
| 1.52     | 1452.00 | 17.42       | 14.02     | 5.03     | 2354.00 | 7.01        | 4.87      | 2.92     |
| 1.83     | 1285.00 | 10.58       | 7.18      | 2.58     | 1214.00 | 5.11        | 2.97      | 1.78     |
| -0.91    | 1597.00 | 3.94        | 0.54      | 0.20     | 861.00  | 1.51        | 0.63      | -0.38    |
| -0.94    | 2749.00 | 5.49        | 2.09      | 0.75     | 3699.00 | 3.57        | 1.43      | 0.86     |
| -0.93    | 2526.00 | 3.13        | 0.27      | -0.10    | 2923.00 | 0.89        | 1.25      | -0.75    |
| -0.75    | 1875.00 | 3.04        | 0.36      | -0.13    | 2556.00 | 2.03        | 0.11      | -0.06    |
| -0.99    | 4558.00 | 2.59        | 0.81      | -0.29    | 4579.00 | 0.98        | 1.16      | -0.69    |
| -0.84    | 2348.00 | 3.28        | 0.12      | -0.04    | 2121.00 | 0.42        | 1.72      | -1.03    |
| -0.88    | 1372.00 | 3.21        | 0.19      | -0.07    | 977.00  | 0.82        | 1.32      | -0.79    |
| -0.71    | 2272.00 | 4.89        | 1.49      | 0.53     | 1740.00 | 0.63        | 1.51      | -0.90    |
| -0.69    | 2549.00 | 4.04        | 0.64      | 0.23     | 2428.00 | 2.22        | 0.08      | 0.05     |
| -0.93    | 2919.00 | 3.01        | 0.39      | -0.14    | 1991.00 | 0.10        | 2.04      | -1.22    |
| -0.71    | 1427.00 | 1.05        | 2.35      | -0.84    | 2419.00 | 0.41        | 1.73      | -1.04    |
| -0.83    | 1426.00 | 1.75        | 1.65      | -0.59    | 2079.00 | 0.63        | 1.51      | -0.91    |
| -0.28    | 2842.00 | 4.47        | 1.07      | 0.38     | 2281.00 | 1.23        | 0.91      | -0.55    |
| -0.94    | 1922.00 | 2.76        | 0.64      | -0.23    | 2497.00 | 0.48        | 1.66      | -1.00    |
| -0.90    | 2099.00 | 1.81        | 1.59      | -0.57    | 2602.00 | 0.15        | 1.99      | -1.19    |
| -0.91    | 1398.00 | 1.65        | 1.75      | -0.63    | 1554.00 | 0.39        | 1.75      | -1.05    |
| -0.55    | 2153.00 | 3.90        | 0.50      | 0.18     | 3283.00 | 0.40        | 1.74      | -1.05    |
| -0.91    | 2832.00 | 9.53        | 6.13      | 2.20     | 3915.00 | 1.10        | 1.04      | -0.62    |
| 0.05     | 3150.00 | 15.14       | 11.74     | 4.21     | 4273.00 | 1.83        | 0.31      | -0.19    |
| -0.89    | 2827.00 | 2.97        | 0.43      | -0.15    | 3902.00 | 0.62        | 1.52      | -0.91    |
| -0.36    | 4361.00 | 10.55       | 7.15      | 2.56     | 2540.00 | 1.93        | 0.21      | -0.13    |
| -0.03    | 2027.00 | 4.00        | 0.60      | 0.21     | 2054.00 | 0.49        | 1.65      | -0.99    |
| -0.04    | 2687.00 | 4.47        | 1.07      | 0.38     | 2970.00 | 3.77        | 1.63      | 0.98     |
| -0.14    | 2651.00 | 8.37        | 4.97      | 1.78     | 2493.00 | 1.68        | 0.46      | -0.27    |
| 0.52     | 3203.00 | 4.46        | 1.06      | 0.38     | 3453.00 | 2.95        | 0.81      | 0.49     |
| 1.28     | 2721.00 | 9.85        | 6.45      | 2.31     | 2083.00 | 2.59        | 0.45      | 0.27     |



|       |         |       |       |       |         |       |       |       |
|-------|---------|-------|-------|-------|---------|-------|-------|-------|
| 0.68  | 2895.00 | 5.01  | 1.61  | 0.58  | 1674.00 | 2.15  | 0.01  | 0.01  |
| 0.94  | 3118.00 | 14.05 | 10.65 | 3.82  | 3056.00 | 4.55  | 2.41  | 1.45  |
| -0.14 | 3288.00 | 10.10 | 6.70  | 2.40  | 3545.00 | 3.24  | 1.10  | 0.66  |
| -0.12 | 2324.00 | 5.29  | 1.89  | 0.68  | 2157.00 | 3.62  | 1.48  | 0.89  |
| 0.14  | 2476.00 | 6.42  | 3.02  | 1.08  | 2811.00 | 1.71  | 0.43  | -0.26 |
| 0.36  | 2108.00 | 6.21  | 2.81  | 1.01  | 1927.00 | 2.49  | 0.35  | 0.21  |
| -0.15 | 2787.00 | 3.77  | 0.37  | 0.13  | 1487.00 | 2.69  | 0.55  | 0.33  |
| 2.16  | 2064.00 | 7.51  | 4.11  | 1.47  | 1585.00 | 5.05  | 2.91  | 1.75  |
| 1.72  | 2995.00 | 3.14  | 0.26  | -0.09 | 2144.00 | 5.64  | 3.50  | 2.10  |
| 0.07  | 3915.00 | 1.56  | 1.84  | -0.66 | 2702.00 | 1.96  | 0.18  | -0.11 |
| 1.11  | 4635.00 | 8.41  | 5.01  | 1.80  | 2808.00 | 3.92  | 1.78  | 1.07  |
| 2.80  | 5215.00 | 7.67  | 4.27  | 1.53  | 4256.00 | 8.27  | 6.13  | 3.68  |
| 0.94  | 4053.00 | 5.67  | 2.27  | 0.82  | 2654.00 | 5.84  | 3.70  | 2.22  |
| 0.36  | 3138.00 | 2.29  | 1.11  | -0.40 | 2107.00 | 5.17  | 3.03  | 1.82  |
| 0.19  | 2218.00 | 1.13  | 2.27  | -0.81 | 2646.00 | 1.51  | 0.63  | -0.38 |
| -0.06 | 4542.00 | 6.05  | 2.65  | 0.95  | 3021.00 | 6.39  | 4.25  | 2.55  |
| 0.63  | 3733.00 | 2.46  | 0.94  | -0.33 | 3988.00 | 10.03 | 7.89  | 4.74  |
| -0.35 | 4395.00 | 2.39  | 1.01  | -0.36 | 3498.00 | 8.38  | 6.24  | 3.74  |
| 0.42  | 3751.00 | 3.97  | 0.57  | 0.21  | 3295.00 | 9.29  | 7.15  | 4.29  |
| -0.12 | 2770.00 | 1.12  | 2.28  | -0.82 | 2102.00 | 8.14  | 6.00  | 3.60  |
| 0.49  | 3475.00 | 2.50  | 0.90  | -0.32 | 2884.00 | 13.18 | 11.04 | 6.62  |
| 0.02  | 3725.00 | 0.59  | 2.81  | -1.01 | 2703.00 | 3.26  | 1.12  | 0.67  |
| -0.27 | 2954.00 | 0.81  | 2.59  | -0.93 | 2282.00 | 2.06  | 0.08  | -0.05 |
| -0.10 | 2927.00 | 2.32  | 1.08  | -0.38 | 1932.00 | 5.64  | 3.50  | 2.10  |
| -0.61 | 2639.00 | 1.71  | 1.69  | -0.61 | 2630.00 | 6.43  | 4.29  | 2.57  |
| -0.73 | 3364.00 | 1.40  | 2.00  | -0.72 | 1983.00 | 2.52  | 0.38  | 0.23  |
| -0.71 | 1984.00 | 1.81  | 1.59  | -0.57 | 1985.00 | 5.89  | 3.75  | 2.25  |
| 0.01  | 2949.00 | 2.17  | 1.23  | -0.44 | 3079.00 | 8.57  | 6.43  | 3.86  |
| -0.69 | 2185.00 | 1.10  | 2.30  | -0.82 | 1995.00 | 2.81  | 0.67  | 0.40  |
| -0.66 | 3162.00 | 0.51  | 2.89  | -1.04 | 2835.00 | 4.41  | 2.27  | 1.36  |
| -0.30 | 4015.00 | 2.12  | 1.28  | -0.46 | 3057.00 | 5.56  | 3.42  | 2.05  |
| -0.09 | 4654.00 | 3.89  | 0.49  | 0.18  | 2915.00 | 11.32 | 9.18  | 5.51  |
| -0.85 | 2039.00 | 0.34  | 3.06  | -1.09 | 1969.00 | 1.57  | 0.57  | -0.34 |
| -0.94 | 2955.00 | 0.95  | 2.45  | -0.88 | 2669.00 | 1.35  | 0.79  | -0.47 |
| -0.26 | 3024.00 | 7.71  | 4.31  | 1.54  | 2957.00 | 4.23  | 2.09  | 1.25  |
| -0.11 | 3123.00 | 8.45  | 5.05  | 1.81  | 2198.00 | 4.55  | 2.41  | 1.45  |
| 0.36  | 2114.00 | 7.43  | 4.03  | 1.44  | 2380.00 | 8.28  | 6.14  | 3.68  |
| -0.44 | 2126.00 | 6.30  | 2.90  | 1.04  | 2347.00 | 2.51  | 0.37  | 0.22  |
| -0.67 | 2205.00 | 2.68  | 0.72  | -0.26 | 2787.00 | 1.72  | 0.42  | -0.25 |
| -0.15 | 1352.00 | 7.32  | 3.92  | 1.41  | 1012.00 | 3.46  | 1.32  | 0.79  |
| -0.34 | 2193.00 | 4.79  | 1.39  | 0.50  | 2388.00 | 5.40  | 3.26  | 1.96  |
| -0.13 | 1454.00 | 8.18  | 4.78  | 1.72  | 1464.00 | 8.06  | 5.92  | 3.55  |
| -0.26 | 2417.00 | 4.59  | 1.19  | 0.43  | 2141.00 | 2.71  | 0.57  | 0.34  |
| -0.20 | 2819.00 | 4.36  | 0.96  | 0.35  | 3257.00 | 5.43  | 3.29  | 1.98  |
| -0.48 | 1366.00 | 5.34  | 1.94  | 0.70  | 1360.00 | 3.75  | 1.61  | 0.97  |
| -0.74 | 1311.00 | 3.05  | 0.35  | -0.12 | 1327.00 | 1.28  | 0.86  | -0.52 |
| -0.61 | 1873.00 | 5.39  | 1.99  | 0.72  | 1667.00 | 2.64  | 0.50  | 0.30  |

|       |         |      |      |       |         |      |      |       |
|-------|---------|------|------|-------|---------|------|------|-------|
| -0.19 | 2365.00 | 6.89 | 3.49 | 1.25  | 2750.00 | 5.85 | 3.71 | 2.23  |
| -0.37 | 952.00  | 8.61 | 5.21 | 1.87  | 843.00  | 5.10 | 2.96 | 1.78  |
| -0.94 | 2779.00 | 2.63 | 0.77 | -0.28 | 2150.00 | 2.14 | 0.00 | 0.00  |
| -0.70 | 3234.00 | 6.28 | 2.88 | 1.03  | 2670.00 | 3.07 | 0.93 | 0.56  |
| -0.54 | 2863.00 | 5.03 | 1.63 | 0.59  | 2926.00 | 2.12 | 0.02 | -0.01 |
| -0.38 | 2370.00 | 6.75 | 3.35 | 1.20  | 2678.00 | 5.49 | 3.35 | 2.01  |
| -0.60 | 2257.00 | 6.56 | 3.16 | 1.13  | 2076.00 | 2.65 | 0.51 | 0.31  |
| -0.46 | 2643.00 | 1.51 | 1.89 | -0.68 | 3412.00 | 0.94 | 1.20 | -0.72 |
| -0.24 | 2515.00 | 0.95 | 2.45 | -0.88 | 3097.00 | 0.39 | 1.75 | -1.05 |
| 0.64  | 2888.00 | 6.75 | 3.35 | 1.20  | 3424.00 | 1.61 | 0.53 | -0.32 |
| -0.17 | 3408.00 | 1.88 | 1.52 | -0.54 | 3115.00 | 0.55 | 1.59 | -0.96 |
| -0.03 | 1276.00 | 0.78 | 2.62 | -0.94 | 2203.00 | 0.14 | 2.00 | -1.20 |
| -0.01 | 1620.00 | 1.17 | 2.23 | -0.80 | 1175.00 | 1.02 | 1.12 | -0.67 |
| 2.48  | 3577.00 | 9.78 | 6.38 | 2.29  | 3522.00 | 2.47 | 0.33 | 0.20  |
| 0.78  | 2354.00 | 2.72 | 0.68 | -0.24 | 1567.00 | 1.40 | 0.74 | -0.44 |
| -0.42 | 1805.00 | 0.72 | 2.68 | -0.96 | 2814.00 | 0.60 | 1.54 | -0.92 |
| 0.47  | 3239.00 | 1.23 | 2.17 | -0.77 | 2341.00 | 0.56 | 1.58 | -0.95 |
| 0.67  | 1335.00 | 1.57 | 1.83 | -0.65 | 2590.00 | 2.36 | 0.22 | 0.13  |
| 2.31  | 3025.00 | 1.88 | 1.52 | -0.54 | 2630.00 | 1.90 | 0.24 | -0.14 |
| -0.59 | 2369.00 | 0.97 | 2.43 | -0.87 | 1641.00 | 1.46 | 0.68 | -0.41 |
| -0.10 | 2847.00 | 0.70 | 2.70 | -0.97 | 2699.00 | 4.04 | 1.90 | 1.14  |
| 1.03  | 3353.00 | 1.16 | 2.24 | -0.80 | 2957.00 | 1.18 | 0.96 | -0.57 |
| -0.12 | 4378.00 | 0.75 | 2.65 | -0.95 | 3805.00 | 2.00 | 0.14 | -0.09 |
| -0.17 | 4119.00 | 0.87 | 2.53 | -0.90 | 2542.00 | 0.83 | 1.31 | -0.79 |
| 0.64  | 2432.00 | 1.73 | 1.67 | -0.60 | 2290.00 | 1.40 | 0.74 | -0.45 |
| -0.79 | 1202.00 | 1.00 | 2.40 | -0.86 | 1868.00 | 1.45 | 0.69 | -0.42 |
| -0.94 | 2889.00 | 0.31 | 3.09 | -1.11 | 3172.00 | 0.38 | 1.76 | -1.06 |
| -0.43 | 3758.00 | 4.47 | 1.07 | 0.38  | 3719.00 | 0.40 | 1.74 | -1.04 |
| -0.38 | 2383.00 | 2.98 | 0.42 | -0.15 | 3634.00 | 0.55 | 1.59 | -0.95 |
| -0.14 | 2412.00 | 3.73 | 0.33 | 0.12  | 2381.00 | 0.21 | 1.93 | -1.16 |
| -0.81 | 1822.00 | 2.31 | 1.09 | -0.39 | 1705.00 | 0.47 | 1.67 | -1.00 |
| 1.23  | 3530.00 | 7.31 | 3.91 | 1.40  | 3110.00 | 1.22 | 0.92 | -0.55 |
| -0.23 | 3465.00 | 3.61 | 0.21 | 0.08  | 2495.00 | 1.72 | 0.42 | -0.25 |
| -0.32 | 4138.00 | 8.72 | 5.32 | 1.91  | 2300.00 | 0.87 | 1.27 | -0.76 |
| -0.88 | 1728.00 | 2.08 | 1.32 | -0.47 | 839.00  | 0.48 | 1.66 | -1.00 |
| -0.57 | 3562.00 | 4.80 | 1.40 | 0.50  | 3357.00 | 2.32 | 0.18 | 0.11  |
| -0.47 | 2714.00 | 3.68 | 0.28 | 0.10  | 2505.00 | 0.40 | 1.74 | -1.04 |
| -0.68 | 1985.00 | 1.96 | 1.44 | -0.51 | 1576.00 | 1.02 | 1.12 | -0.67 |
| -0.92 | 2607.00 | 1.76 | 1.64 | -0.59 | 1786.00 | 0.62 | 1.52 | -0.91 |
| 0.51  | 2605.00 | 7.45 | 4.05 | 1.45  | 2326.00 | 0.39 | 1.75 | -1.05 |
| -0.75 | 2138.00 | 5.47 | 2.07 | 0.74  | 2394.00 | 2.97 | 0.83 | 0.50  |
| -0.85 | 2252.00 | 2.89 | 0.51 | -0.18 | 2570.00 | 1.13 | 1.01 | -0.61 |
| -0.78 | 3480.00 | 3.65 | 0.25 | 0.09  | 1844.00 | 0.87 | 1.27 | -0.76 |
| -0.22 | 3518.00 | 4.12 | 0.72 | 0.26  | 2790.00 | 2.83 | 0.69 | 0.42  |
| -0.52 | 2339.00 | 6.41 | 3.01 | 1.08  | 2918.00 | 3.67 | 1.53 | 0.92  |
| -0.82 | 1741.00 | 2.64 | 0.76 | -0.27 | 2023.00 | 5.44 | 3.30 | 1.98  |
| -0.90 | 2053.00 | 3.21 | 0.19 | -0.07 | 870.00  | 1.49 | 0.65 | -0.39 |

|       |         |       |      |       |         |      |      |       |
|-------|---------|-------|------|-------|---------|------|------|-------|
| -0.74 | 2131.00 | 3.00  | 0.40 | -0.14 | 2166.00 | 1.52 | 0.62 | -0.37 |
| -0.77 | 1995.00 | 5.46  | 2.06 | 0.74  | 2457.00 | 2.52 | 0.38 | 0.23  |
| -0.40 | 1035.00 | 9.57  | 6.17 | 2.21  | 701.00  | 1.71 | 0.43 | -0.26 |
| -0.96 | 1104.00 | 5.07  | 1.67 | 0.60  | 1487.00 | 0.47 | 1.67 | -1.00 |
| 0.22  | 481.00  | 6.03  | 2.63 | 0.94  | 424.00  | 3.30 | 1.16 | 0.70  |
| 0.04  | 2629.00 | 9.24  | 5.84 | 2.10  | 1918.00 | 1.77 | 0.37 | -0.22 |
| -0.47 | 2826.00 | 7.86  | 4.46 | 1.60  | 1881.00 | 1.12 | 1.02 | -0.61 |
| -0.83 | 2527.00 | 8.59  | 5.19 | 1.86  | 1462.00 | 1.57 | 0.57 | -0.34 |
| -0.57 | 2697.00 | 8.49  | 5.09 | 1.83  | 2517.00 | 1.95 | 0.19 | -0.12 |
| -0.42 | 1996.00 | 5.26  | 1.86 | 0.67  | 1957.00 | 1.64 | 0.50 | -0.30 |
| -0.70 | 655.00  | 1.68  | 1.72 | -0.62 | 375.00  | 0.53 | 1.61 | -0.96 |
| -0.89 | 1412.00 | 2.90  | 0.50 | -0.18 | 2117.00 | 1.46 | 0.68 | -0.41 |
| -0.33 | 3356.00 | 9.54  | 6.14 | 2.20  | 3394.00 | 2.06 | 0.08 | -0.05 |
| -0.83 | 1981.00 | 4.14  | 0.74 | 0.27  | 2118.00 | 2.64 | 0.50 | 0.30  |
| -0.84 | 1879.00 | 1.81  | 1.59 | -0.57 | 2267.00 | 0.66 | 1.48 | -0.89 |
| -0.91 | 1615.00 | 0.93  | 2.47 | -0.88 | 2059.00 | 1.51 | 0.63 | -0.38 |
| -0.76 | 2685.00 | 4.13  | 0.73 | 0.26  | 2927.00 | 1.47 | 0.67 | -0.40 |
| -0.98 | 1968.00 | 6.66  | 3.26 | 1.17  | 1719.00 | 5.88 | 3.74 | 2.24  |
| -0.67 | 2546.00 | 2.32  | 1.08 | -0.39 | 2649.00 | 2.79 | 0.65 | 0.39  |
| -0.82 | 2534.00 | 0.95  | 2.45 | -0.88 | 2727.00 | 1.28 | 0.86 | -0.51 |
| -0.36 | 2437.00 | 0.86  | 2.54 | -0.91 | 2266.00 | 1.24 | 0.90 | -0.54 |
| 0.76  | 1509.00 | 1.13  | 2.27 | -0.81 | 664.00  | 2.11 | 0.03 | -0.02 |
| 1.32  | 2677.00 | 3.55  | 0.15 | 0.05  | 2065.00 | 2.18 | 0.04 | 0.02  |
| 0.52  | 2360.00 | 1.82  | 1.58 | -0.56 | 2112.00 | 3.79 | 1.65 | 0.99  |
| -0.35 | 1166.00 | 1.29  | 2.11 | -0.76 | 906.00  | 1.43 | 0.71 | -0.42 |
| 0.39  | 1034.00 | 2.03  | 1.37 | -0.49 | 1452.00 | 1.52 | 0.62 | -0.37 |
| 0.09  | 2873.00 | 1.91  | 1.49 | -0.53 | 3061.00 | 3.27 | 1.13 | 0.68  |
| 1.73  | 3287.00 | 3.86  | 0.46 | 0.17  | 3013.00 | 3.82 | 1.68 | 1.01  |
| 0.68  | 2531.00 | 1.78  | 1.62 | -0.58 | 2500.00 | 1.80 | 0.34 | -0.20 |
| -0.47 | 1843.00 | 0.76  | 2.64 | -0.95 | 1761.00 | 1.53 | 0.61 | -0.36 |
| -0.92 | 1117.00 | 0.45  | 2.95 | -1.06 | 1288.00 | 1.40 | 0.74 | -0.45 |
| 0.07  | 1569.00 | 4.21  | 0.81 | 0.29  | 1859.00 | 3.50 | 1.36 | 0.81  |
| -0.69 | 1825.00 | 3.73  | 0.33 | 0.12  | 1651.00 | 1.39 | 0.75 | -0.45 |
| -0.13 | 2814.00 | 2.06  | 1.34 | -0.48 | 3242.00 | 2.34 | 0.20 | 0.12  |
| -0.20 | 2301.00 | 1.04  | 2.36 | -0.84 | 2279.00 | 1.54 | 0.60 | -0.36 |
| 0.58  | 3146.00 | 3.21  | 0.19 | -0.07 | 3973.00 | 5.94 | 3.80 | 2.28  |
| -0.08 | 1905.00 | 0.42  | 2.98 | -1.07 | 2105.00 | 0.71 | 1.43 | -0.86 |
| 1.18  | 3692.00 | 4.17  | 0.77 | 0.28  | 2861.00 | 2.73 | 0.59 | 0.35  |
| 0.52  | 2375.00 | 1.68  | 1.72 | -0.61 | 2807.00 | 2.64 | 0.50 | 0.30  |
| -0.19 | 2742.00 | 2.22  | 1.18 | -0.42 | 3297.00 | 1.85 | 0.29 | -0.17 |
| 3.31  | 2951.00 | 12.23 | 8.83 | 3.17  | 2432.00 | 4.03 | 1.89 | 1.13  |
| 4.85  | 1661.00 | 8.61  | 5.21 | 1.87  | 1760.00 | 2.16 | 0.02 | 0.01  |
| 2.66  | 2906.00 | 5.33  | 1.93 | 0.69  | 1489.00 | 0.87 | 1.27 | -0.76 |
| 1.90  | 3512.00 | 6.01  | 2.61 | 0.94  | 1578.00 | 0.63 | 1.51 | -0.90 |
| 3.98  | 1139.00 | 4.21  | 0.81 | 0.29  | 938.00  | 1.28 | 0.86 | -0.52 |
| 3.11  | 2670.00 | 4.72  | 1.32 | 0.47  | 2186.00 | 1.24 | 0.90 | -0.54 |

|       |         |      |      |       |         |       |      |       |
|-------|---------|------|------|-------|---------|-------|------|-------|
| 2.09  | 2705.00 | 7.54 | 4.14 | 1.49  | 1248.00 | 0.96  | 1.18 | -0.71 |
| 3.27  | 2271.00 | 6.43 | 3.03 | 1.09  | 2000.00 | 0.85  | 1.29 | -0.77 |
| 3.74  | 2185.00 | 9.38 | 5.98 | 2.14  | 3282.00 | 2.07  | 0.07 | -0.04 |
| 4.52  | 1390.00 | 4.03 | 0.63 | 0.23  | 1593.00 | 2.07  | 0.07 | -0.04 |
| 4.50  | 799.00  | 6.63 | 3.23 | 1.16  | 772.00  | 2.20  | 0.06 | 0.04  |
| 2.19  | 2127.00 | 6.02 | 2.62 | 0.94  | 1826.00 | 1.53  | 0.61 | -0.36 |
| 0.84  | 2368.00 | 1.60 | 1.80 | -0.64 | 2249.00 | 1.47  | 0.67 | -0.40 |
| 2.18  | 1844.00 | 3.69 | 0.29 | 0.10  | 2664.00 | 4.09  | 1.95 | 1.17  |
| 0.04  | 1121.00 | 4.46 | 1.06 | 0.38  | 1255.00 | 0.72  | 1.42 | -0.85 |
| 0.65  | 1726.00 | 4.29 | 0.89 | 0.32  | 1396.00 | 5.52  | 3.38 | 2.03  |
| 2.17  | 2693.00 | 3.19 | 0.21 | -0.07 | 2663.00 | 3.57  | 1.43 | 0.86  |
| 1.02  | 2203.00 | 2.32 | 1.09 | -0.39 | 1132.00 | 1.41  | 0.73 | -0.44 |
| 2.03  | 1977.00 | 3.29 | 0.11 | -0.04 | 2147.00 | 2.42  | 0.28 | 0.17  |
| 1.97  | 1224.00 | 0.90 | 2.50 | -0.90 | 2038.00 | 5.20  | 3.06 | 1.84  |
| 3.28  | 2865.00 | 2.62 | 0.78 | -0.28 | 2373.00 | 3.37  | 1.23 | 0.74  |
| 3.51  | 3688.00 | 3.09 | 0.31 | -0.11 | 2284.00 | 1.36  | 0.78 | -0.47 |
| 3.05  | 1937.00 | 2.58 | 0.82 | -0.29 | 2736.00 | 1.50  | 0.64 | -0.38 |
| 2.68  | 3151.00 | 3.90 | 0.50 | 0.18  | 2759.00 | 3.04  | 0.90 | 0.54  |
| 0.79  | 3130.00 | 1.28 | 2.12 | -0.76 | 4488.00 | 2.01  | 0.13 | -0.08 |
| 3.82  | 3582.00 | 5.95 | 2.55 | 0.91  | 3766.00 | 5.87  | 3.73 | 2.24  |
| 0.44  | 2844.00 | 1.02 | 2.38 | -0.85 | 3374.00 | 1.07  | 1.07 | -0.64 |
| 1.30  | 1987.00 | 1.76 | 1.64 | -0.59 | 1753.00 | 2.68  | 0.54 | 0.33  |
| 1.73  | 2371.00 | 1.43 | 1.97 | -0.70 | 2186.00 | 2.33  | 0.19 | 0.12  |
| 2.09  | 808.00  | 1.61 | 1.79 | -0.64 | 482.00  | 3.32  | 1.18 | 0.71  |
| -0.21 | 2021.00 | 0.84 | 2.56 | -0.92 | 1178.00 | 1.02  | 1.12 | -0.67 |
| 0.15  | 1728.00 | 1.33 | 2.07 | -0.74 | 2203.00 | 2.13  | 0.01 | 0.00  |
| -0.09 | 2754.00 | 1.45 | 1.95 | -0.70 | 2440.00 | 1.68  | 0.46 | -0.28 |
| -0.23 | 2468.00 | 2.23 | 1.17 | -0.42 | 2779.00 | 1.87  | 0.27 | -0.16 |
| -0.63 | 2520.00 | 1.63 | 1.77 | -0.63 | 2031.00 | 2.02  | 0.12 | -0.07 |
| -0.47 | 2396.00 | 1.67 | 1.73 | -0.62 | 2794.00 | 3.61  | 1.47 | 0.89  |
| -0.43 | 3216.00 | 2.08 | 1.32 | -0.47 | 3533.00 | 2.38  | 0.24 | 0.14  |
| 0.61  | 3079.00 | 1.92 | 1.48 | -0.53 | 2929.00 | 4.51  | 2.37 | 1.42  |
| 1.38  | 3685.00 | 5.07 | 1.67 | 0.60  | 3373.00 | 10.08 | 7.94 | 4.77  |
| -0.46 | 1980.00 | 0.71 | 2.69 | -0.96 | 2933.00 | 2.56  | 0.42 | 0.25  |
| 2.26  | 4163.00 | 6.03 | 2.63 | 0.94  | 3351.00 | 6.89  | 4.75 | 2.85  |
| 1.04  | 2469.00 | 1.86 | 1.54 | -0.55 | 1630.00 | 0.80  | 1.34 | -0.81 |
| 2.02  | 3374.00 | 1.78 | 1.62 | -0.58 | 2749.00 | 3.27  | 1.13 | 0.68  |
| 0.24  | 2099.00 | 1.52 | 1.88 | -0.67 | 1528.00 | 1.37  | 0.77 | -0.46 |
| 1.38  | 1661.00 | 0.30 | 3.10 | -1.11 | 1543.00 | 1.43  | 0.71 | -0.43 |
| 0.92  | 1835.00 | 1.09 | 2.31 | -0.83 | 1246.00 | 1.85  | 0.29 | -0.18 |
| 1.83  | 2390.00 | 1.42 | 1.98 | -0.71 | 2354.00 | 1.49  | 0.65 | -0.39 |
| 3.57  | 283.00  | 3.53 | 0.13 | 0.05  | 150.00  | 4.00  | 1.86 | 1.12  |
| 1.36  | 2421.00 | 0.66 | 2.74 | -0.98 | 2203.00 | 1.77  | 0.37 | -0.22 |
| 1.04  | 2863.00 | 1.15 | 2.25 | -0.80 | 2628.00 | 2.59  | 0.45 | 0.27  |
| 0.76  | 2894.00 | 0.48 | 2.92 | -1.04 | 2097.00 | 0.81  | 1.33 | -0.80 |
| -0.26 | 4174.00 | 0.86 | 2.54 | -0.91 | 2804.00 | 1.64  | 0.50 | -0.30 |
| -0.54 | 2215.00 | 2.98 | 0.42 | -0.15 | 1855.00 | 1.99  | 0.15 | -0.09 |

|       |         |       |       |       |         |      |      |       |
|-------|---------|-------|-------|-------|---------|------|------|-------|
| -0.27 | 3188.00 | 1.10  | 2.30  | -0.82 | 1808.00 | 1.22 | 0.92 | -0.55 |
| -0.26 | 1784.00 | 1.01  | 2.39  | -0.86 | 2158.00 | 2.13 | 0.01 | 0.00  |
| 0.90  | 4009.00 | 2.89  | 0.51  | -0.18 | 3078.00 | 1.72 | 0.42 | -0.25 |
| 0.29  | 4050.00 | 2.10  | 1.30  | -0.47 | 2492.00 | 1.97 | 0.17 | -0.10 |
| 0.35  | 2670.00 | 1.54  | 1.86  | -0.67 | 1419.00 | 1.83 | 0.31 | -0.18 |
| 0.90  | 2246.00 | 3.34  | 0.06  | -0.02 | 1233.00 | 2.03 | 0.11 | -0.07 |
| -0.10 | 2144.00 | 0.93  | 2.47  | -0.88 | 1432.00 | 1.40 | 0.74 | -0.45 |
| 0.19  | 1693.00 | 1.54  | 1.86  | -0.67 | 1436.00 | 0.70 | 1.44 | -0.87 |
| -0.18 | 3358.00 | 3.42  | 0.02  | 0.01  | 2413.00 | 2.07 | 0.07 | -0.04 |
| -0.41 | 3182.00 | 1.16  | 2.24  | -0.80 | 3250.00 | 2.40 | 0.26 | 0.16  |
| -0.41 | 2229.00 | 3.10  | 0.30  | -0.11 | 2416.00 | 3.81 | 1.67 | 1.00  |
| 0.89  | 2043.00 | 2.59  | 0.81  | -0.29 | 2052.00 | 4.09 | 1.95 | 1.17  |
| 0.36  | 1239.00 | 0.56  | 2.84  | -1.01 | 980.00  | 1.22 | 0.92 | -0.55 |
| 0.92  | 1414.00 | 3.47  | 0.07  | 0.02  | 1862.00 | 5.64 | 3.50 | 2.10  |
| 0.54  | 1983.00 | 2.67  | 0.73  | -0.26 | 2978.00 | 4.16 | 2.02 | 1.21  |
| 0.65  | 2567.00 | 2.22  | 1.18  | -0.42 | 2764.00 | 3.22 | 1.08 | 0.65  |
| 1.48  | 2022.00 | 2.42  | 0.98  | -0.35 | 1824.00 | 0.71 | 1.43 | -0.86 |
| 0.69  | 1735.00 | 1.79  | 1.61  | -0.58 | 2128.00 | 2.63 | 0.49 | 0.30  |
| -0.06 | 2392.00 | 2.17  | 1.23  | -0.44 | 3090.00 | 1.17 | 0.98 | -0.58 |
| 0.56  | 2296.00 | 1.79  | 1.61  | -0.58 | 2477.00 | 2.95 | 0.81 | 0.48  |
| -0.20 | 2212.00 | 0.54  | 2.86  | -1.02 | 2891.00 | 0.93 | 1.21 | -0.72 |
| 0.43  | 2483.00 | 3.02  | 0.38  | -0.13 | 2039.00 | 0.59 | 1.55 | -0.93 |
| 0.65  | 2418.00 | 1.41  | 1.99  | -0.71 | 1506.00 | 1.53 | 0.61 | -0.37 |
| 2.91  | 2427.00 | 5.40  | 2.00  | 0.72  | 2112.00 | 2.89 | 0.75 | 0.45  |
| 1.15  | 2967.00 | 1.52  | 1.88  | -0.67 | 2213.00 | 0.63 | 1.51 | -0.90 |
| 1.48  | 3593.00 | 3.67  | 0.27  | 0.10  | 2271.00 | 0.92 | 1.22 | -0.73 |
| 1.47  | 3466.00 | 1.73  | 1.67  | -0.60 | 3525.00 | 2.70 | 0.56 | 0.33  |
| 2.71  | 2360.00 | 2.88  | 0.52  | -0.18 | 1973.00 | 0.51 | 1.63 | -0.98 |
| 2.46  | 3461.00 | 5.81  | 2.41  | 0.86  | 2536.00 | 1.97 | 0.17 | -0.10 |
| 0.85  | 2065.00 | 2.32  | 1.08  | -0.38 | 2737.00 | 0.99 | 1.15 | -0.69 |
| 0.67  | 2119.00 | 0.38  | 3.02  | -1.08 | 2006.00 | 0.55 | 1.59 | -0.95 |
| 1.20  | 2582.00 | 3.37  | 0.03  | -0.01 | 2150.00 | 2.14 | 0.00 | 0.00  |
| 0.90  | 1227.00 | 1.06  | 2.34  | -0.84 | 1153.00 | 2.69 | 0.55 | 0.33  |
| 4.24  | 3531.00 | 10.85 | 7.45  | 2.67  | 2159.00 | 1.99 | 0.15 | -0.09 |
| 3.92  | 3196.00 | 7.01  | 3.61  | 1.29  | 2811.00 | 2.99 | 0.85 | 0.51  |
| 3.15  | 5032.00 | 13.36 | 9.96  | 3.57  | 2900.00 | 4.55 | 2.41 | 1.45  |
| 3.25  | 3174.00 | 5.70  | 2.30  | 0.83  | 3277.00 | 3.78 | 1.64 | 0.99  |
| 1.37  | 3477.00 | 5.92  | 2.52  | 0.91  | 1522.00 | 1.18 | 0.96 | -0.57 |
| 0.68  | 2875.00 | 4.45  | 1.05  | 0.38  | 1920.00 | 1.46 | 0.68 | -0.41 |
| 0.91  | 3381.00 | 4.50  | 1.10  | 0.39  | 2258.00 | 0.35 | 1.79 | -1.07 |
| 0.96  | 4429.00 | 10.54 | 7.14  | 2.56  | 2491.00 | 2.45 | 0.31 | 0.19  |
| 0.28  | 3617.00 | 3.21  | 0.19  | -0.07 | 2475.00 | 1.05 | 1.09 | -0.65 |
| 3.68  | 2169.00 | 13.37 | 9.97  | 3.57  | 2375.00 | 4.51 | 2.37 | 1.42  |
| 6.47  | 2141.00 | 17.98 | 14.58 | 5.23  | 1641.00 | 8.59 | 6.45 | 3.87  |
| 0.63  | 5071.00 | 9.17  | 5.77  | 2.07  | 3100.00 | 1.77 | 0.37 | -0.22 |
| -0.01 | 1585.00 | 1.89  | 1.51  | -0.54 | 1354.00 | 0.89 | 1.25 | -0.75 |
| -0.11 | 2036.00 | 0.54  | 2.86  | -1.02 | 1465.00 | 0.82 | 1.32 | -0.79 |

|       |         |       |       |       |         |       |         |       |
|-------|---------|-------|-------|-------|---------|-------|---------|-------|
| -0.43 | 2412.00 | 2.40  | 1.00  | -0.36 | 1951.00 | 1.64  | 0.50    | -0.30 |
| 1.13  | 3071.00 | 5.93  | 2.53  | 0.91  | 1622.00 | 3.51  | 1.37    | 0.83  |
| 0.51  | 2451.00 | 6.98  | 3.58  | 1.28  | 2409.00 | 2.74  | 0.60    | 0.36  |
| 0.45  | 1947.00 | 4.78  | 1.38  | 0.49  | 1754.00 | 2.91  | 0.77    | 0.46  |
| 2.71  | 2967.00 | 8.09  | 4.69  | 1.68  | 2906.00 | 6.09  | 3.95    | 2.37  |
| 1.62  | 1850.00 | 5.08  | 1.68  | 0.60  | 1969.00 | 1.83  | 0.31    | -0.19 |
| 2.46  | 1416.00 | 8.62  | 5.22  | 1.87  | 1447.00 | 4.35  | 2.21    | 1.33  |
| 0.18  | 1972.00 | 4.21  | 0.81  | 0.29  | 1291.00 | 1.63  | 0.51    | -0.31 |
| 0.87  | 2492.00 | 9.59  | 6.19  | 2.22  | 1559.00 | 5.00  | 2.86    | 1.72  |
| 2.16  | 1888.00 | 9.16  | 5.76  | 2.07  | 2015.00 | 6.05  | 3.91    | 2.35  |
| 0.51  | 2382.00 | 3.11  | 0.29  | -0.10 | 2395.00 | 4.09  | 1.95    | 1.17  |
| 0.38  | 1760.00 | 5.28  | 1.88  | 0.68  | 1336.00 | 4.72  | 2.58    | 1.55  |
| 0.55  | 1672.00 | 3.89  | 0.49  | 0.18  | 1562.00 | 5.38  | 3.24    | 1.94  |
| 0.60  | 2962.00 | 3.78  | 0.38  | 0.14  | 1530.00 | 1.31  | 0.83    | -0.50 |
| 1.46  | 1483.00 | 7.28  | 3.88  | 1.39  | 1661.00 | 2.17  | 0.03    | 0.02  |
| 2.51  | 2744.00 | 9.40  | 6.00  | 2.15  | 1509.00 | 5.17  | 3.03    | 1.82  |
| 1.84  | 1962.00 | 6.98  | 3.58  | 1.29  | 1682.00 | 3.27  | 1.13    | 0.68  |
| 0.59  | 1521.00 | 4.67  | 1.27  | 0.46  | 1203.00 | 3.41  | 1.27    | 0.76  |
| 1.08  | 1913.00 | 2.67  | 0.73  | -0.26 | 1563.00 | 2.43  | 0.29    | 0.18  |
| 0.63  | 1596.00 | 3.51  | 0.11  | 0.04  | 1187.00 | 1.60  | 0.54    | -0.32 |
| -0.06 | 2649.00 | 8.57  | 5.17  | 1.85  | 3233.00 | 2.63  | 0.49    | 0.29  |
| -0.64 | 1407.00 | 4.90  | 1.50  | 0.54  | 2349.00 | 1.23  | 0.91    | -0.54 |
| 1.87  | 503.00  | 18.09 | 14.69 | 5.27  | 1572.00 | 10.56 | 8.42    | 5.05  |
| -0.66 | 790.00  | 10.13 | 6.73  | 2.41  | 1866.00 | 1.45  | 0.69    | -0.42 |
| 0.73  | 1676.00 | 14.80 | 11.40 | 4.09  | 3194.00 | 11.30 | 9.16    | 5.50  |
| 0.10  | 408.00  | 6.37  | 2.97  | 1.07  | 1432.00 | 5.10  | 2.96    | 1.78  |
| 0.16  | 160.00  | 7.50  | 4.10  | 1.47  | 1023.00 | 4.89  | 2.75    | 1.65  |
| -0.85 | 444.00  | 6.53  | 3.13  | 1.12  | 1237.00 | 3.23  | 1.09    | 0.66  |
| -0.69 | 370.00  | 3.51  | 0.11  | 0.04  | 1034.00 | 2.22  | 0.08    | 0.05  |
| -0.01 | 934.00  | 8.14  | 4.74  | 1.70  | 2020.00 | 9.36  | 7.22    | 4.33  |
| -0.21 | 803.00  | 6.72  | 3.32  | 1.19  | 1302.00 | 3.00  | 0.86    | 0.51  |
| 0.77  | 1258.00 | 3.58  | 0.18  | 0.06  | 1829.00 | 3.44  | 1.30    | 0.78  |
| -0.70 | 1139.00 | 3.34  | 0.06  | -0.02 | 2047.00 | 4.49  | 2.35    | 1.41  |
| -0.71 | 1056.00 | 0.85  | 2.55  | -0.91 | 1466.00 | 0.75  | 1.39    | -0.83 |
| 0.71  | 1442.00 | 2.50  | 0.90  | -0.32 | 1800.00 | 3.06  | 0.92    | 0.55  |
| -0.68 | 1078.00 | 1.39  | 2.01  | -0.72 | 1629.00 | 3.81  | 1.67    | 1.00  |
| -0.16 | 2377.00 | 2.65  | 0.75  | -0.27 | 3614.00 | 4.21  | 2.07    | 1.24  |
| 0.93  | 786.00  | 1.40  | 2.00  | -0.72 | 257.00  | 4.67  | 2.53    | 1.52  |
| 0.47  | 1407.00 | 0.71  | 2.69  | -0.96 | 700.00  | 1.71  | 0.43    | -0.26 |
| -0.31 | 951.00  | 1.47  | 1.93  | -0.69 | 742.00  | 6.74  | 4.60    | 2.76  |
|       | 2366.50 | 3.40  | 1.89  |       | 2157.50 | 2.14  | 1.13    |       |
|       |         |       | 5.66  |       |         |       | 3.38    |       |
|       |         |       | 2.79  |       |         |       | 1.67    |       |
|       | 3096.00 | 31.04 |       |       | 1947.00 | 22.14 |         |       |
|       |         |       |       |       | 1982.00 | 26.74 | 2898.00 | 16.60 |
|       | 1422.00 | 30.66 |       |       | 1920.00 | 22.81 |         |       |
|       |         |       |       |       | 2336.00 | 16.70 | 2808.00 | 14.39 |

|         |       |         |       |         |      |
|---------|-------|---------|-------|---------|------|
| 2259.00 | 30.85 | 2046.25 | 22.10 |         |      |
|         |       | 194.83  | 4.13  | 1183.70 | 0.27 |
| 420.00  | 1.19  | 335.00  | 4.78  |         |      |
| 520.00  | 2.12  | 717.00  | 2.65  |         |      |
| 314.00  | 1.91  | 897.00  | 0.33  |         |      |
| 648.00  | 3.86  | 742.00  | 1.75  |         |      |
| 494.00  | 2.63  | 785.33  | 1.58  |         |      |
| 168.51  | 1.07  | 97.51   | 1.17  |         |      |
|         | 0.80  |         | 12.40 |         |      |
|         | 3.21  |         | 3.50  |         |      |
|         | 4.01  |         | 15.90 |         |      |
|         | 28.22 |         | 20.52 |         |      |
|         | 0.14  |         | 0.78  |         |      |
|         | 0.86  |         | 0.22  |         |      |
| 293.00  | 2.39  | 365.00  | 0.55  |         |      |
| 69.00   | 8.70  | 53.00   | 7.55  |         |      |
| 2852.00 | 3.30  | 2499.00 | 4.48  |         |      |
| 1825.00 | 10.69 | 1823.00 | 1.76  |         |      |
| 4516.00 | 5.58  | 4030.00 | 3.05  |         |      |
| 4941.00 | 3.42  | 3590.00 | 3.29  |         |      |

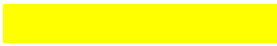

x toxic a,b,c

x toxic b



y

y

y

y

y

y

y

y

y

y

x debris a,b

x debris a,b

y

x toxic b,c

x toxic b

|           |                        |                 | cell ct | % inf  | AD       |
|-----------|------------------------|-----------------|---------|--------|----------|
| 50061 A02 | M-016111- NECAP end    | 55707 NECAP2    | 306     | 28.105 | 18.61945 |
| 50061 A04 | M-015459- transmembr   | 55706 TMEM48    | 298     | 18.792 | 9.30645  |
| 50061 A05 | M-021233- hypothetic   | 55319 FLJ11184  | 283     | 26.502 | 17.01645 |
| 50061 A06 | M-016863- importin 9   | 55705 IPO9      | 588     | 19.558 | 10.07245 |
| 50061 A07 | M-017100- chromosom    | 55320 C14orf106 | 1063    | 13.452 | 3.96645  |
| 50061 A08 | M-016902- polymerase   | 55703 POLR3B    | 837     | 18.16  | 8.67445  |
| 50061 A09 | M-021223- chromosom    | 55322 C5orf22   | 1004    | 15.637 | 6.15145  |
| 50061 A10 | M-017954- coiled-coil  | 55702 CCDC94    | 696     | 26.58  | 17.09445 |
| 50061 A11 | M-021333- La ribonucl  | 55323 LARP6     | 468     | 40.171 | 30.68545 |
| 50061 A12 | M-030269- hypothetic   | 55701 FLJ10357  | 402     | 24.876 | 15.39045 |
| 50061 A13 | M-021213- chromosom    | 55325 C4orf20   | 533     | 23.265 | 13.77945 |
| 50061 A14 | M-015538- MAP7 dom     | 55700 MAP7D1    | 659     | 18.058 | 8.57245  |
| 50061 A15 | M-008554- 1-acylglyce  | 55326 AGPAT5    | 501     | 34.132 | 24.64645 |
| 50061 A16 | M-020404- isoleucyl-tF | 55699 IARS2     | 1463    | 19.139 | 9.65345  |
| 50061 A17 | M-008473- lin-7 homo   | 55327 LIN7C     | 611     | 26.187 | 16.70145 |
| 50061 A18 | M-017110- FLJ10324 p   | 55698 FLJ10324  | 2082    | 10.855 | 1.36945  |
| 50061 A19 | M-021211- chromosom    | 55328 C10orf59  | 1769    | 13.397 | 3.91145  |
| 50061 A20 | M-015729- Vac14 hom    | 55697 VAC14     | 1741    | 23.435 | 13.94945 |
| 50061 A21 | M-021209- meiosis-spr  | 55329 MNS1      | 1203    | 18.869 | 9.38345  |
| 50061 A23 | M-021194- cappuccinc   | 55330 CNO       | 1112    | 21.763 | 12.27745 |
| 50061 B02 | M-010894- vacuolar pr  | 55737 VPS35     | 1691    | 12.596 | 3.11045  |
| 50061 B04 | M-013826- neuroblast   | 55672 NBPF1     | 1642    | 6.3946 | 3.09095  |
| 50061 B05 | M-018888- kelch repea  | 55709 KBTBD4    | 3974    | 9.5873 | 0.10175  |
| 50061 B06 | M-015708- kelch repea  | 84078 KBTBD7    | 2625    | 12.038 | 2.55245  |
| 50061 B07 | M-018704- male sterili | 55711 MLSTD1    | 1817    | 6.5493 | 2.93625  |
| 50061 B08 | M-013526- protocadhe   | 56129 PCDHB7    | 1564    | 6.9693 | 2.51625  |
| 50061 B09 | M-017955- zinc finger  | 55713 ZNF334    | 4647    | 9.8558 | 0.37025  |
| 50061 B10 | M-013280- protocadhe   | 56128 PCDHB8    | 4019    | 6.5937 | 2.89185  |
| 50061 B11 | M-020773- polymerase   | 55718 POLR3E    | 2694    | 7.7951 | 1.69045  |
| 50061 B12 | M-013279- protocadhe   | 56127 PCDHB9    | 1010    | 9.3069 | 0.17865  |
| 50061 B13 | M-016268- chromosom    | 55719 C10orf6   | 1584    | 11.869 | 2.38345  |
| 50061 B14 | M-013529- protocadhe   | 56123 PCDHB13   | 1955    | 11.918 | 2.43245  |
| 50061 B15 | M-017111- TSR1, 20S r  | 55720 TSR1      | 3139    | 6.69   | 2.79555  |
| 50061 B16 | M-013277- protocadhe   | 56114 PCDHGA1   | 2299    | 11.309 | 1.82345  |
| 50061 B17 | M-021202- IQ motif co  | 55721 IQCC      | 3253    | 7.5623 | 1.92325  |
| 50061 B18 | M-013276- protocadhe   | 56113 PCDHGA2   | 4196    | 13.513 | 4.02745  |
| 50061 B19 | M-020549- centrosom.   | 55722 CEP72     | 1222    | 8.2651 | 1.22045  |
| 50061 B20 | M-013275- protocadhe   | 56112 PCDHGA3   | 4152    | 10.164 | 0.67845  |
| 50061 B21 | M-020553- ASF1 anti-s  | 55723 ASF1B     | 2440    | 6.8033 | 2.68225  |
| 50061 B23 | M-020643- chromosom    | 55726 C12orf11  | 3676    | 9.5484 | 0.06285  |
| 50061 C02 | M-021186- RNA bindin   | 55696 RBM22     | 627     | 4.3062 | 5.17935  |
| 50061 C04 | M-020709- jumonji do   | 55693 JMJD2D    | 1020    | 8.3333 | 1.15225  |
| 50061 C05 | M-009430- phytocerar   | 55331 PHCA      | 716     | 4.7486 | 4.73695  |
| 50061 C06 | M-015452- LUC7-like (  | 55692 LUC7L     | 579     | 6.9085 | 2.57705  |
| 50061 C07 | M-021191- damage-re,   | 55332 DRAM      | 1529    | 6.998  | 2.48755  |
| 50061 C08 | M-017109- FERM dom     | 55691 FRMD4A    | 2467    | 7.1747 | 2.31085  |

|           |                        |                 |      |        |         |
|-----------|------------------------|-----------------|------|--------|---------|
| 50061 C09 | M-021176- synaptojan   | 55333 SYNJ2BP   | 907  | 6.505  | 2.98055 |
| 50061 C10 | M-006697- phosphofu    | 55690 PACS1     | 1030 | 6.9903 | 2.49525 |
| 50061 C11 | M-007574- solute carri | 55334 SLC39A9   | 1121 | 9.4558 | 0.02975 |
| 50061 C12 | M-017141- YEATS dom    | 55689 YEATS2    | 991  | 4.6418 | 4.84375 |
| 50061 C13 | M-015435- nipsnap ho   | 55335 NIPSNAP3E | 791  | 9.9874 | 0.50185 |
| 50061 C14 | M-017953- tRNA 5-me    | 55687 TRMU      | 1408 | 9.9432 | 0.45765 |
| 50061 C15 | M-017504- F-box and l  | 55336 FBXL8     | 1518 | 10.804 | 1.31845 |
| 50061 C16 | M-020853- melanoreg    | 55686 MREG      | 3377 | 7.1069 | 2.37865 |
| 50061 C17 | M-020478- hypothetic   | 55337 FLJ11286  | 3130 | 7.508  | 1.97755 |
| 50061 C18 | M-031749- chromoson    | 55684 C9orf86   | 4166 | 6.6251 | 2.86045 |
| 50061 C19 | M-020475- hypothetic   | 55338 FLJ11292  | 2840 | 18.592 | 9.10645 |
| 50061 C20 | M-016928- hypothetic   | 55683 FLJ10081  | 3448 | 10.934 | 1.44845 |
| 50061 C21 | M-017101- WD repeat    | 55339 WDR33     | 3699 | 10.408 | 0.92245 |
| 50061 C23 | M-013342- GTPase, IM   | 55340 GIMAP5    | 2479 | 8.9956 | 0.48995 |
| 50061 D02 | M-013274- protocadhe   | 56111 PCDHGA4   | 1688 | 4.4431 | 5.04245 |
| 50061 D04 | M-013273- protocadhe   | 56110 PCDHGA5   | 1464 | 6.5574 | 2.92815 |
| 50061 D05 | M-020855- chromoson    | 55731 C17orf63  | 2629 | 6.3903 | 3.09525 |
| 50061 D06 | M-013272- protocadhe   | 56109 PCDHGA6   | 2863 | 8.5575 | 0.92805 |
| 50061 D07 | M-020930- chromoson    | 55732 C1orf112  | 2361 | 5.7603 | 3.72525 |
| 50061 D08 | M-013271- protocadhe   | 56108 PCDHGA7   | 2451 | 4.1616 | 5.32395 |
| 50061 D09 | M-009316- hedgehog s   | 55733 HHAT      | 3019 | 4.4717 | 5.01385 |
| 50061 D10 | M-013270- protocadhe   | 56107 PCDHGA9   | 2324 | 6.9277 | 2.55785 |
| 50061 D11 | M-021205- DnaJ (Hsp4   | 55735 DNAJC11   | 4193 | 6.1054 | 3.38015 |
| 50061 D12 | M-013294- protocadhe   | 56106 PCDHGA10  | 817  | 6.12   | 3.36555 |
| 50061 D13 | M-007259- hypothetic   | 55739 FLJ10769  | 2740 | 7.2263 | 2.25925 |
| 50061 D14 | M-013293- protocadhe   | 56105 PCDHGA11  | 3448 | 4.6984 | 4.78715 |
| 50061 D15 | M-021932- enabled ho   | 55740 ENAH      | 2030 | 11.626 | 2.14045 |
| 50061 D16 | M-013292- protocadhe   | 56104 PCDHGB1   | 4620 | 5.9524 | 3.53315 |
| 50061 D17 | M-020238- chromoson    | 55744 C7orf44   | 2630 | 5.4373 | 4.04825 |
| 50061 D18 | M-013291- protocadhe   | 56103 PCDHGB2   | 3879 | 7.0895 | 2.39605 |
| 50061 D19 | M-015523- chromoson    | 55745 C14orf108 | 4319 | 5.3948 | 4.09075 |
| 50061 D20 | M-013290- protocadhe   | 56102 PCDHGB3   | 3882 | 4.3534 | 5.13215 |
| 50061 D21 | M-013322- nucleopori   | 55746 NUP133    | 3208 | 8.0112 | 1.47435 |
| 50061 D23 | M-026372- family with  | 55747 FAM21B    | 3563 | 10.356 | 0.87045 |
| 50061 E02 | M-007016- RUN and F    | 55680 RUFY2     | 4661 | 12.787 | 3.30145 |
| 50061 E04 | M-020851- LIM and se   | 55679 LIMS2     | 1119 | 10.188 | 0.70245 |
| 50061 E05 | M-031865- large subur  | 55341 LSG1      | 989  | 3.64   | 5.84555 |
| 50061 E06 | M-010671- IWS1 homc    | 55677 IWS1      | 1420 | 10.352 | 0.86645 |
| 50061 E07 | M-015439- spermatid j  | 55342 STRBP     | 1290 | 10.388 | 0.90245 |
| 50061 E08 | M-007527- solute carri | 55676 SLC30A6   | 3319 | 11.66  | 2.17445 |
| 50061 E09 | M-010693- solute carri | 55343 SLC35C1   | 2192 | 7.8467 | 1.63885 |
| 50061 E10 | M-019093- SMEK hom     | 55671 SMEK1     | 3033 | 11.078 | 1.59245 |
| 50061 E11 | M-020472- phosphatid   | 55344 PLCXD1    | 1141 | 8.8519 | 0.63365 |
| 50061 E12 | M-019128- peroxisome   | 55670 PEX26     | 759  | 15.283 | 5.79745 |
| 50061 E13 | M-027203- chromoson    | 55345 C4orf21   | 716  | 14.106 | 4.62045 |
| 50061 E14 | M-010670- mitofusin 1  | 55669 MFN1      | 2719 | 12.909 | 3.42345 |
| 50061 E15 | M-018101- t-complex :  | 55346 TCP11L1   | 1269 | 14.184 | 4.69845 |



|           |                         |                 |      |        |          |
|-----------|-------------------------|-----------------|------|--------|----------|
| 50061 E16 | M-020798- chromosom     | 55668 C14orf118 | 1554 | 11.583 | 2.09745  |
| 50061 E17 | M-020469- abhydrolas    | 55347 ABHD10    | 2171 | 8.4754 | 1.01015  |
| 50061 E18 | M-015536- DENN/MAI      | 55667 DENND4C   | 1730 | 8.2659 | 1.21965  |
| 50061 E19 | M-008123- choline def   | 55349 CHDH      | 1963 | 6.7753 | 2.71025  |
| 50061 E20 | M-020796- nuclear prc   | 55666 NPLOC4    | 1905 | 6.8766 | 2.60895  |
| 50061 E21 | M-013047- vanin 3       | 55350 VNN3      | 2072 | 8.3012 | 1.18435  |
| 50061 E23 | M-013800- chromosom     | 55352 C17orf79  | 2672 | 6.25   | 3.23555  |
| 50061 F02 | M-013289- protocadhe    | 56101 PCDHGB5   | 3290 | 11.55  | 2.06445  |
| 50061 F04 | M-013288- protocadhe    | 56100 PCDHGB6   | 2202 | 13.806 | 4.32045  |
| 50061 F05 | M-005813- CNDP dipej    | 55748 CNDP2     | 2557 | 14.47  | 4.98445  |
| 50061 F06 | M-013287- protocadhe    | 56099 PCDHGB7   | 1388 | 13.112 | 3.62645  |
| 50061 F07 | M-013828- cell divisior | 55749 CCAR1     | 2256 | 15.115 | 5.62945  |
| 50061 F08 | M-013286- protocadhe    | 56098 PCDHGC4   | 2901 | 19.166 | 9.68045  |
| 50061 F09 | M-020246- transmemk     | 55751 TMEM34    | 3056 | 19.143 | 9.65745  |
| 50061 F10 | M-013285- protocadhe    | 56097 PCDHGC5   | 1606 | 10.336 | 0.85045  |
| 50061 F11 | M-009703- oxoglutarar   | 55753 OGDHL     | 1735 | 10.663 | 1.17745  |
| 50061 F12 | M-015585- chromosom     | 56063 C1orf91   | 1790 | 12.57  | 3.08445  |
| 50061 F13 | M-020272- transmemk     | 55754 TMEM30A   | 2195 | 12.711 | 3.22545  |
| 50061 F14 | M-012866- kelch-like 4  | 56062 KLHL4     | 1977 | 16.439 | 6.95345  |
| 50061 F15 | M-020275- integrator (  | 55756 RC74      | 2145 | 12.96  | 3.47445  |
| 50061 F16 | M-013154- platelet del  | 56034 PDGFC     | 1354 | 21.566 | 12.08045 |
| 50061 F17 | M-013806- UDP-glucos    | 55757 UGCL2     | 2228 | 10.413 | 0.92745  |
| 50061 F18 | M-020561- chromosom     | 56006 C19orf61  | 1980 | 17.525 | 8.03945  |
| 50061 F19 | M-017112- REST corep    | 55758 RCOR3     | 2550 | 11.294 | 1.80845  |
| 50061 F20 | M-013837- chromosom     | 56005 C19orf10  | 1934 | 8.3764 | 1.10915  |
| 50061 F21 | M-003768- DEAH (Asp-    | 55760 DHX32     | 1236 | 7.4434 | 2.04215  |
| 50061 F23 | M-015541- tetratricop   | 55761 TTC17     | 2560 | 7.0312 | 2.45435  |
| 50061 G02 | M-017108- up-regulate   | 55665 URG4      | 660  | 4.697  | 4.78855  |
| 50061 G04 | M-020365- zinc finger   | 55663 ZNF446    | 801  | 10.112 | 0.62645  |
| 50061 G05 | M-017710- lysosomal a   | 55353 LAPTM4B   | 758  | 3.0343 | 6.45125  |
| 50061 G06 | M-013635- DEAD (Asp-    | 55661 DDX27     | 333  | 12.012 | 2.52645  |
| 50061 G07 | M-007449- solute carri  | 55356 SLC22A15  | 564  | 8.8652 | 0.62035  |
| 50061 G08 | M-027984- PRP40 pre-    | 55660 PRPF40A   | 221  | 13.122 | 3.63645  |
| 50061 G09 | M-020463- TBC1 doma     | 55357 TBC1D2    | 548  | 9.854  | 0.36845  |
| 50061 G10 | M-013825- zinc finger   | 55659 ZNF416    | 662  | 13.142 | 3.65645  |
| 50061 G11 | M-025105- transmemk     | 55362 TMEM63B   | 377  | 10.08  | 0.59445  |
| 50061 G12 | M-007015- ring finger   | 55658 RNF126    | 376  | 8.2447 | 1.24085  |
| 50061 G13 | M-021355- hemogen       | 55363 HEMGN     | 437  | 4.5767 | 4.90885  |
| 50061 G14 | M-015534- zinc finger   | 55657 ZNF692    | 492  | 5.4878 | 3.99775  |
| 50061 G15 | M-020439- Impact hon    | 55364 IMPACT    | 768  | 12.24  | 2.75445  |
| 50061 G16 | M-020270- integrator (  | 55656 INTS8     | 1785 | 6.7787 | 2.70685  |
| 50061 G17 | M-019157- transmemk     | 55365 TMEM176/  | 1607 | 4.6671 | 4.81845  |
| 50061 G18 | M-020232- transmemk     | 55654 TMEM127   | 1433 | 5.5827 | 3.90285  |
| 50061 G19 | M-015644- transmemk     | 55374 TMCO6     | 825  | 7.6364 | 1.84915  |
| 50061 G20 | M-010578- breast carc   | 55653 BCAS4     | 1615 | 4.8916 | 4.59395  |
| 50061 G21 | M-010669- leucine rich  | 55379 LRRC59    | 580  | 6.5517 | 2.93385  |
| 50061 G23 | M-019193- minichrom     | 55388 MCM10     | 1277 | 13.626 | 4.14045  |

|           |                        |                 |      |        |         |
|-----------|------------------------|-----------------|------|--------|---------|
| 50061 H02 | M-010445- nuclear RN   | 56001 NXF2      | 2322 | 15.935 | 6.44945 |
| 50061 H04 | M-008445- nuclear RN   | 56000 NXF3      | 1329 | 12.566 | 3.08045 |
| 50061 H05 | M-020277- zinc finger  | 55762 ZNF701    | 1845 | 11.599 | 2.11345 |
| 50061 H06 | M-013599- nuclear RN   | 55998 NXF5      | 1104 | 5.4348 | 4.05075 |
| 50061 H07 | M-013312- exocyst cor  | 55763 EXOC1     | 1461 | 12.663 | 3.17745 |
| 50061 H08 | M-015574- kelch-like 7 | 55975 KLHL7     | 1700 | 6.6471 | 2.83845 |
| 50061 H09 | M-016457- N-glycanas   | 55768 NGLY1     | 2041 | 9.7991 | 0.31355 |
| 50061 H10 | M-020567- recombinar   | 55974 RAG1AP1   | 977  | 14.023 | 4.53745 |
| 50061 H11 | M-017357- exocyst cor  | 55770 EXOC2     | 1510 | 10.927 | 1.44145 |
| 50061 H12 | M-020579- chromoson    | 55969 C20orf24  | 949  | 8.0084 | 1.47715 |
| 50061 H13 | M-007019- proline rich | 55771 PRR11     | 855  | 9.0058 | 0.47975 |
| 50061 H14 | M-017222- NSFL1 (p97   | 55968 NSFL1C    | 945  | 8.1481 | 1.33745 |
| 50061 H15 | M-020533- TBC1 doma    | 55773 TBC1D23   | 1520 | 13.684 | 4.19845 |
| 50061 H16 | M-009094- NADH dehy    | 55967 NDUFA12   | 1212 | 16.007 | 6.52145 |
| 50061 H17 | M-020536- chromoson    | 55776 C6orf64   | 1072 | 8.7687 | 0.71685 |
| 50061 H18 | M-009879- adherens ju  | 55966 AJAP1     | 1401 | 7.3519 | 2.13365 |
| 50061 H19 | M-027190- methyl-CpC   | 55777 MBD5      | 1830 | 10.765 | 1.27945 |
| 50061 H20 | M-013840- kelch-like 9 | 55958 KLHL9     | 675  | 5.6296 | 3.85595 |
| 50061 H21 | M-020540- chromoson    | 55778 C14orf131 | 795  | 5.5346 | 3.95095 |
| 50061 H23 | M-017113- WD repeat    | 55779 WDR52     | 2381 | 6.0059 | 3.47965 |
| 50061 I02 | M-020346- hypothetic   | 55652 FLJ20489  | 2783 | 7.8333 | 1.65225 |
| 50061 I04 | M-013319- nucleolar p  | 55651 NOLA2     | 2305 | 7.3319 | 2.15365 |
| 50061 I05 | M-020379- hypothetic   | 55415 PRO2964   | 1191 | 6.801  | 2.68455 |
| 50061 I06 | M-015531- phosphatid   | 55650 PIGV      | 628  | 9.8726 | 0.38705 |
| 50061 I07 | M-020376- chromoson    | 55421 C17orf85  | 1751 | 4.8544 | 4.63115 |
| 50061 I08 | M-021139- Ly1 antiboc  | 55646 LYAR      | 2846 | 4.4273 | 5.05825 |
| 50061 I09 | M-021386- zinc finger  | 55422 ZNF331    | 1676 | 9.6062 | 0.12065 |
| 50061 I10 | M-005981- O-sialoglyc  | 55644 OSGEP     | 1768 | 8.8801 | 0.60545 |
| 50061 I11 | M-017104- KIAA1704     | 55425 KIAA1704  | 1276 | 4.0752 | 5.41035 |
| 50061 I12 | M-016110- BTB (POZ) c  | 55643 BTBD2     | 1224 | 6.2908 | 3.19475 |
| 50061 I13 | M-015504- chromoson    | 55435 C4orf16   | 1157 | 5.7044 | 3.78115 |
| 50061 I14 | M-021135- feline leuke | 55640 FLVCR2    | 1492 | 6.0992 | 3.38635 |
| 50061 I15 | M-015669- chromoson    | 55453 C14orf116 | 2296 | 3.8763 | 5.60925 |
| 50061 I16 | M-021127- hypothetic   | 55638 FLJ20366  | 2076 | 5.4432 | 4.04235 |
| 50061 I17 | M-015941- chondroitir  | 55454 GALNACT-2 | 1700 | 4.2941 | 5.19145 |
| 50061 I18 | M-025947- chromodor    | 55636 CHD7      | 1290 | 5.5814 | 3.90415 |
| 50061 I19 | M-013338- chromoson    | 55471 C2orf56   | 1895 | 6.8074 | 2.67815 |
| 50061 I20 | M-021113- zinc finger  | 55634 ZNF673    | 1061 | 4.9953 | 4.49025 |
| 50061 I21 | M-021387- presenilin 2 | 55486 PARL      | 2157 | 6.7687 | 2.71685 |
| 50061 I23 | M-008238- carbohydra   | 55501 CHST12    | 2681 | 6.1544 | 3.33115 |
| 50061 J02 | M-013311- lin-37 hom   | 55957 LIN37     | 2718 | 13.907 | 4.42145 |
| 50061 J04 | M-020592- zinc finger, | 55954 ZMAT5     | 1827 | 11.932 | 2.44645 |
| 50061 J05 | M-028653- chromoson    | 55780 C6orf70   | 3351 | 10.862 | 1.37645 |
| 50061 J06 | M-031960- myosin VC    | 55930 MYO5C     | 2449 | 12.74  | 3.25445 |
| 50061 J07 | M-018783- hypothetic   | 55783 FLJ11171  | 2421 | 6.361  | 3.12455 |
| 50061 J08 | M-006378- DNA methy    | 55929 DMAP1     | 1321 | 13.02  | 3.53445 |
| 50061 J09 | M-020810- multiple C2  | 55784 MCTP2     | 2907 | 6.8455 | 2.64005 |

|           |                        |                 |      |        |          |
|-----------|------------------------|-----------------|------|--------|----------|
| 50061 J10 | M-017958- chromoson    | 55924 C1orf183  | 882  | 7.7098 | 1.77575  |
| 50061 J11 | M-007020- zinc finger  | 55786 ZNF415    | 1751 | 8.4523 | 1.03325  |
| 50061 J12 | M-031862- NF-kappaB    | 55922 NKRF      | 838  | 6.0859 | 3.39965  |
| 50061 J13 | M-020815- chromoson    | 55787 CXorf15   | 2263 | 7.9982 | 1.48735  |
| 50061 J14 | M-013835- regulator o  | 55920 RCC2      | 1782 | 9.0909 | 0.39465  |
| 50061 J15 | M-017956- LMBR1 dor    | 55788 LMBRD1    | 1742 | 6.372  | 3.11355  |
| 50061 J16 | M-013834- CTTNBP2 N    | 55917 CTTNBP2NI | 1256 | 5.7325 | 3.75305  |
| 50061 J17 | M-013830- DEP domai    | 55789 DEPDC1B   | 1346 | 9.2868 | 0.19875  |
| 50061 J18 | M-016931- nuclear tra  | 55916 NXT2      | 2305 | 8.1128 | 1.37275  |
| 50061 J19 | M-016174- chondroitir  | 55790 ChGn      | 1493 | 5.2244 | 4.26115  |
| 50061 J20 | M-017118- LanC lantib  | 55915 LANCL2    | 792  | 2.1465 | 7.33905  |
| 50061 J21 | M-018103- chromoson    | 55791 C1orf103  | 2039 | 6.6699 | 2.81565  |
| 50061 J23 | M-017114- family with  | 55793 FAM63A    | 1203 | 6.7332 | 2.75235  |
| 50061 K02 | M-021109- TBC1 doma    | 55633 TBC1D22B  | 1940 | 19.278 | 9.79245  |
| 50061 K04 | M-007014- KIAA1333     | 55632 KIAA1333  | 865  | 36.185 | 26.69945 |
| 50061 K05 | M-013332- nucleolar p  | 55505 NOLA3     | 1028 | 14.883 | 5.39745  |
| 50061 K06 | M-021101- zinc finger  | 55628 ZNF407    | 840  | 10.595 | 1.10945  |
| 50061 K07 | M-007549- solute carri | 55508 SLC35E3   | 786  | 24.427 | 14.94145 |
| 50061 K08 | M-020681- sphingomy    | 55627 SMPD4     | 323  | 36.223 | 26.73745 |
| 50061 K09 | M-013327- DEAD (Asp-   | 55510 DDX43     | 312  | 34.295 | 24.80945 |
| 50061 K10 | M-029987- hypothetic   | 55626 FLJ20294  | 694  | 32.565 | 23.07945 |
| 50061 K11 | M-013328- sarcoma ar   | 55511 SAGE1     | 365  | 35.342 | 25.85645 |
| 50061 K12 | M-021091- zinc finger, | 55625 ZDHHC7    | 272  | 36.029 | 26.54345 |
| 50061 K13 | M-008358- elaC homol   | 55520 ELAC1     | 320  | 27.187 | 17.70145 |
| 50061 K14 | M-021087- protein O-l  | 55624 POMGNT1   | 474  | 40.928 | 31.44245 |
| 50061 K15 | M-007012- tripartite r | 55521 TRIM36    | 625  | 36     | 26.51445 |
| 50061 K16 | M-021071- THUMP do     | 55623 THUMPD1   | 168  | 36.905 | 27.41945 |
| 50061 K17 | M-009050- dehydroge    | 55526 DHTKD1    | 963  | 16.615 | 7.12945  |
| 50061 K18 | M-015527- tetratricop  | 55622 TTC27     | 418  | 37.799 | 28.31345 |
| 50061 K19 | M-013807- fem-1 hom    | 55527 FEM1A     | 650  | 20.769 | 11.28345 |
| 50061 K20 | M-009655- TRM1 tRNA    | 55621 TRMT1     | 1063 | 19.097 | 9.61145  |
| 50061 K21 | M-013808- transmemk    | 55529 TMEM55A   | 2848 | 15.133 | 5.64745  |
| 50061 K23 | M-007326- SV2 relatec  | 55530 SVOP      | 1976 | 17.966 | 8.48045  |
| 50061 L02 | M-031861- erbb2 inter  | 55914 ERBB2IP   | 3236 | 16.656 | 7.17045  |
| 50061 L04 | M-016113- bridging int | 55909 BIN3      | 1914 | 17.241 | 7.75545  |
| 50061 L05 | M-017202- DEAD (Asp-   | 55794 DDX28     | 2001 | 19.69  | 10.20445 |
| 50061 L06 | M-013833- hepatocell   | 55908 LOC55908  | 2885 | 11.508 | 2.02245  |
| 50061 L07 | M-020730- PCI domair   | 55795 PCID2     | 3105 | 23.929 | 14.44345 |
| 50061 L08 | M-009780- cytidine mc  | 55907 CMAS      | 1011 | 28.586 | 19.10045 |
| 50061 L09 | M-015373- muscleblin   | 55796 MBNL3     | 556  | 28.058 | 18.57245 |
| 50061 L10 | M-007025- KIAA1166     | 55906 KIAA1166  | 1071 | 14.846 | 5.36045  |
| 50061 L11 | M-008721- methyltran   | 55798 METTL2B   | 1064 | 29.323 | 19.83745 |
| 50061 L12 | M-007024- zinc finger  | 55905 ZNF313    | 1006 | 23.757 | 14.27145 |
| 50061 L13 | M-021246- calcium cha  | 55799 CACNA2D3  | 1492 | 21.381 | 11.89545 |
| 50061 L14 | M-021153- thrombosp    | 55901 THSD1     | 1049 | 22.498 | 13.01245 |
| 50061 L15 | M-017115- sodium cha   | 55800 SCN3B     | 1118 | 24.329 | 14.84345 |
| 50061 L16 | M-020987- zinc finger  | 55900 ZNF302    | 450  | 23.111 | 13.62545 |

|           |                        |                 |      |        |          |
|-----------|------------------------|-----------------|------|--------|----------|
| 50061 L17 | M-020444- centaurin, i | 55803 CENTA2    | 376  | 18.085 | 8.59945  |
| 50061 L18 | M-017653- unc-45 hon   | 55898 UNC45A    | 538  | 16.729 | 7.24345  |
| 50061 L19 | M-017116- LRP2 bindir  | 55805 LRP2BP    | 1313 | 23.991 | 14.50545 |
| 50061 L20 | M-008762- mesoderm     | 55897 MESP1     | 1535 | 22.866 | 13.38045 |
| 50061 L21 | M-015512- ST6 (alpha-  | 55808 ST6GALNA4 | 1158 | 12.09  | 2.60445  |
| 50061 L23 | M-013831- spermatog    | 55812 SPATA7    | 2055 | 19.416 | 9.93045  |
| 50061 M02 | M-021069- signal-trans | 55620 STAP2     | 1202 | 2.8286 | 6.65695  |
| 50061 M04 | M-023079- dedicator c  | 55619 DOCK10    | 479  | 7.5157 | 1.96985  |
| 50061 M05 | M-013812- ELMO/CED     | 55531 ELMOD1    | 395  | 7.5949 | 1.89065  |
| 50061 M06 | M-004745- taspase, th  | 55617 TASP1     | 288  | 11.111 | 1.62545  |
| 50061 M07 | M-007324- solute carri | 55532 SLC30A10  | 309  | 9.0615 | 0.42405  |
| 50061 M08 | M-017106- developme    | 55616 DDEFL1    | 398  | 9.5477 | 0.06215  |
| 50061 M09 | M-013813- mastermin    | 55534 MAML3     | 381  | 6.8241 | 2.66145  |
| 50061 M10 | M-004511- chromosom    | 55612 C20orf42  | 464  | 9.0517 | 0.43385  |
| 50061 M11 | M-017989- cell divisio | 55536 CDCA7L    | 572  | 5.4196 | 4.06595  |
| 50061 M12 | M-012918- coiled-coil  | 55610 CCDC132   | 451  | 11.086 | 1.60045  |
| 50061 M13 | M-020845- KCNQ1 dov    | 55539 KCNQ1DN   | 503  | 10.736 | 1.25045  |
| 50061 M14 | M-007013- suppressor   | 55609 SUHW3     | 582  | 4.2955 | 5.19005  |
| 50061 M15 | M-017352- RNA bindin   | 55544 RBM38     | 407  | 9.0909 | 0.39465  |
| 50061 M16 | M-021058- ankyrin rep  | 55608 ANKRD10   | 300  | 11.667 | 2.18145  |
| 50061 M17 | M-024021- ZFP-36 for   | 55552 HSZFP36   | 620  | 7.0968 | 2.38875  |
| 50061 M18 | M-021055- leucine rich | 55604 LRRC16    | 511  | 11.546 | 2.06045  |
| 50061 M19 | M-015101- SRY (sex de  | 55553 SOX6      | 369  | 13.55  | 4.06445  |
| 50061 M20 | M-021046- family with  | 55603 FAM46A    | 1119 | 9.7408 | 0.25525  |
| 50061 M21 | M-005912- kallikrein-r | 55554 KLK15     | 1379 | 7.1791 | 2.30645  |
| 50061 M23 | M-020894- enolase sup  | 55556 ENOSF1    | 683  | 6.1493 | 3.33625  |
| 50061 N02 | M-012998- defensin, b  | 55894 DEFB103A  | 1637 | 6.0476 | 3.43795  |
| 50061 N04 | M-007023- myoneurin    | 55892 MYNN      | 1591 | 8.9881 | 0.49745  |
| 50061 N05 | M-010579- UTP6, smal   | 55813 UTP6      | 1213 | 4.6991 | 4.78645  |
| 50061 N06 | M-021082- lens epithe  | 55891 LENEP     | 1478 | 4.6685 | 4.81705  |
| 50061 N07 | M-020792- translin-ass | 55815 TSNAXIP1  | 857  | 4.9008 | 4.58475  |
| 50061 N08 | M-013307- golgin-like  | 55889 GOLGA     | 1581 | 7.4004 | 2.08515  |
| 50061 N09 | M-017301- jumonji do   | 55818 JMJD1A    | 728  | 14.148 | 4.66245  |
| 50061 N10 | M-020508- zinc finger  | 55888 ZNF167    | 1065 | 11.174 | 1.68845  |
| 50061 N11 | M-007021- ring finger  | 55819 RNF130    | 404  | 7.4257 | 2.05985  |
| 50061 N12 | M-017223- WD repeat    | 55884 WSB2      | 661  | 9.0772 | 0.40835  |
| 50061 N13 | M-007022- vacuolar pr  | 55823 VPS11     | 299  | 11.037 | 1.55145  |
| 50061 N14 | M-020262- gasdermin-   | 55876 GSDML     | 504  | 9.9206 | 0.43505  |
| 50061 N15 | M-020878- IQ motif an  | 55827 IQWD1     | 1048 | 8.4924 | 0.99315  |
| 50061 N16 | M-013832- COBW dor     | 55871 CBWD1     | 557  | 9.5153 | 0.02975  |
| 50061 N17 | M-019353- selenoprot   | 55829 SELS      | 281  | 11.388 | 1.90245  |
| 50061 N18 | M-007445- solute carri | 55867 SLC22A11  | 677  | 9.6012 | 0.11565  |
| 50061 N19 | M-010715- transmemk    | 55831 TMEM111   | 824  | 5.3398 | 4.14575  |
| 50061 N20 | M-018904- transmemk    | 55863 TMEM126E  | 1268 | 6.2303 | 3.25525  |
| 50061 N21 | M-015562- cullin-assoc | 55832 CAND1     | 1902 | 5.0999 | 4.38565  |
| 50061 N23 | M-015809- chromosom    | 55836 C6orf35   | 2031 | 6.0561 | 3.42945  |
| 50061 O02 | M-021030- CDKN2A in    | 55602 CDKN2AIP  | 304  | 11.513 | 2.02745  |

|           |                        |                 |      |         |          |
|-----------|------------------------|-----------------|------|---------|----------|
| 50061 O04 | M-017664- hypothetic   | 55601 FLJ20035  | 247  | 6.0729  | 3.41265  |
| 50061 O05 | M-020942- hypothetic   | 55565 LOC55565  | 131  | 10.687  | 1.20145  |
| 50061 O06 | M-009035- intelectin 1 | 55600 ITLN1     | 197  | 10.66   | 1.17445  |
| 50061 O07 | M-013818- dynein, axc  | 55567 DNAH3     | 371  | 4.3127  | 5.17285  |
| 50061 O08 | M-021646- RNA-bindir   | 55599 RNPC3     | 786  | 4.1985  | 5.28705  |
| 50061 O09 | M-008707- UDP-N-ace    | 55568 GALNT10   | 512  | 7.6172  | 1.86835  |
| 50061 O10 | M-021026- zinc finger, | 55596 ZCCHC8    | 267  | 12.734  | 3.24845  |
| 50061 O11 | M-020951- chromoson    | 55571 C2orf29   | 213  | 15.023  | 5.53745  |
| 50061 O12 | M-013823- OTU domai    | 55593 OTUD5     | 111  | 17.117  | 7.63145  |
| 50061 O13 | M-008137- FAD-depen    | 55572 FOXRED1   | 73   | 21.918  | 12.43245 |
| 50061 O14 | M-013822- golgi autoa  | 55592 GOLGA2L1  | 391  | 8.4399  | 1.04565  |
| 50061 O15 | M-020956- CDV3 homi    | 55573 CDV3      | 299  | 11.037  | 1.55145  |
| 50061 O16 | M-017105- vezatin, ad  | 55591 VEZT      | 395  | 13.671  | 4.18545  |
| 50061 O17 | M-015260- stabilin 2   | 55576 STAB2     | 247  | 11.336  | 1.85045  |
| 50061 O18 | M-023854- intersex-lik | 55588 IXL       | 715  | 5.5944  | 3.89115  |
| 50061 O19 | M-020961- hypothetic   | 55580 LOC55580  | 684  | 6.2865  | 3.19905  |
| 50061 O20 | M-008723- kinesin farr | 55582 KIF27     | 1049 | 7.3403  | 2.14525  |
| 50061 O21 | M-020582- chromoson    | 55267 C22orf26  | 1186 | 9.4435  | 0.04205  |
| 50061 O23 | M-020726- gap junctio  | 57369 GJA9      | 385  | 4.6753  | 4.81025  |
| 50061 P02 | M-009522- enoyl Coen   | 55862 ECHDC1    | 1093 | 6.1299  | 3.35565  |
| 50061 P04 | M-015079- dysbindin (  | 55861 DBNDD2    | 1138 | 9.6661  | 0.18055  |
| 50061 P05 | M-017926- E2F-associa  | 55837 EAPP      | 760  | 11.447  | 1.96145  |
| 50061 P06 | M-015096- brain expre  | 55859 BEX1      | 281  | 9.2527  | 0.23285  |
| 50061 P07 | M-013869- WWC famil    | 55841 WWC3      | 834  | 6.5947  | 2.89085  |
| 50061 P08 | M-018846- transmemk    | 55858 TMEM165   | 842  | 5.9382  | 3.54735  |
| 50061 P09 | M-018019- Rho GTPasi   | 55843 ARHGAP15  | 1283 | 8.0281  | 1.45745  |
| 50061 P10 | M-017957- chromoson    | 55857 C20orf19  | 995  | 6.6332  | 2.85235  |
| 50061 P11 | M-017711- chromoson    | 55845 C3orf10   | 129  | 10.078  | 0.59245  |
| 50061 P12 | M-009794- thioesteras  | 55856 THEM2     | 227  | 5.2863  | 4.19925  |
| 50061 P13 | M-015565- integrin alp | 55846 ITFG2     | 938  | 7.0362  | 2.44935  |
| 50061 P14 | M-020500- family with  | 55855 FAM45B    | 647  | 9.7372  | 0.25165  |
| 50061 P15 | M-020954- zinc finger, | 55847 ZCD1      | 757  | 4.3593  | 5.12625  |
| 50061 P16 | M-020777- zinc finger  | 55854 ZC3H15    | 246  | 7.3171  | 2.16845  |
| 50061 P17 | M-020447- chromoson    | 55848 C9orf46   | 560  | 4.1071  | 5.37845  |
| 50061 P18 | M-027283- chromoson    | 55853 C10orf110 | 382  | 4.9738  | 4.51175  |
| 50061 P19 | M-015719- asparagine   | 55849 ALG13     | 256  | 4.6875  | 4.79805  |
| 50061 P20 | M-017117- testis expre | 55852 TEX2      | 455  | 3.2967  | 6.18885  |
| 50061 P21 | M-021121- uncharacte   | 55850 MDS032    | 776  | 5.1546  | 4.33095  |
| 50061 P23 | M-008057- presenilin ε | 55851 PSENEN    | 737  | 7.7341  | 1.75145  |
|           |                        | mdmdMAD         |      | 9.48555 | 3.1969   |
|           |                        | 3MAD            |      |         | 9.5907   |
|           |                        | MADc            |      |         | 4.731412 |
| 50061 C22 | Human4 Pc RNAi         | empty           |      |         |          |
| 50061 D22 | Human4 Pc RNAi         | empty           |      |         |          |
| 50061 E22 | Human4 Pc RNAi         | empty           |      |         |          |

50061 F22 Human4 Pc RNAi empty

50061 G22 Human4 Pc RNAi empty

50061 H22 Human4 Pc RNAi empty

50061 I22 Human4 Pc RNAi empty

50061 J22 Human4 Pc RNAi empty

50061 G03 Human4 Pc RNAi library cont Dharmacor M-003290- polo-like ki 5347

50061 H03 Human4 Pc RNAi library cont Dharmacor M-003290- polo-like ki 5347

50061 I03 Human4 Pc RNAi library cont Dharmacor D-001206- siControl non-targeting

50061 J03 Human4 Pc RNAi library cont Dharmacor D-001206- siControl non-targeting

50061 K03 Human4 Pc RNAi library cont Dharmacor D-001600-( siGLO RISC-free siRNA

50061 L03 Human4 Pc RNAi library cont Dharmacor D-001600-( siGLO RISC-free siRNA

| rZ       | cell ct | % inf  | AD      | rZ       | cell ct | % inf  | AD       | rZ       |
|----------|---------|--------|---------|----------|---------|--------|----------|----------|
| 3.935284 | 2717    | 10.416 | 1.0195  | -0.22307 | 1936    | 10.589 | 1.13705  | 0.084747 |
| 1.96695  | 2156    | 10.482 | 0.9535  | -0.20863 | 1388    | 10.951 | 10.951   | 0.111728 |
| 3.596485 | 1140    | 13.509 | 2.0735  | 0.453696 | 1487    | 16.88  | 16.88    | 0.553629 |
| 2.128847 | 744     | 20.968 | 9.5325  | 2.085777 | 1964    | 20.061 | 20.061   | 0.790716 |
| 0.838323 | 546     | 21.245 | 9.8095  | 2.146386 | 1569    | 11.409 | 11.409   | 0.145863 |
| 1.833374 | 1597    | 17.909 | 6.4735  | 1.416446 | 2655    | 27.119 | 4.327    | 1.316765 |
| 1.30013  | 717     | 18.968 | 7.5325  | 1.648163 | 1011    | 22.057 | 3.102    | 0.939483 |
| 3.61297  | 1237    | 11.156 | 0.2795  | -0.06116 | 1237    | 21.261 | 8.805    | 0.880155 |
| 6.485474 | 420     | 24.048 | 12.6125 | 2.759702 | 1220    | 17.049 | 21.837   | 0.566225 |
| 3.252824 | 520     | 28.654 | 17.2185 | 3.767526 | 1056    | 14.962 | 16.42725 | 0.410676 |
| 2.912334 | 835     | 21.198 | 9.7625  | 2.136102 | 1143    | 18.898 | 13.21846 | 0.704035 |
| 1.811816 | 1078    | 15.121 | 3.6855  | 0.806413 | 1640    | 21.768 | 13.6647  | 0.917943 |
| 5.209111 | 2051    | 14.822 | 3.3865  | 0.74099  | 1242    | 27.295 | 23.4367  | 1.329882 |
| 2.040289 | 1735    | 13.545 | 2.1095  | 0.461573 | 1894    | 19.219 | 13.9641  | 0.72796  |
| 3.529908 | 1094    | 23.035 | 11.5995 | 2.538051 | 1086    | 20.074 | 12.2932  | 0.791685 |
| 0.289438 | 2632    | 13.184 | 1.7485  | 0.382584 | 1246    | 14.767 | 8.517675 | 0.396143 |
| 0.826698 | 2267    | 14.513 | 3.0775  | 0.673378 | 1637    | 17.349 | 15.3087  | 0.588585 |
| 2.948264 | 2476    | 15.63  | 4.1945  | 0.917785 | 1154    | 21.317 | 4.278383 | 0.884329 |
| 1.983224 | 1894    | 20.011 | 8.5755  | 1.876378 | 827     | 18.138 | 12.01709 | 0.647391 |
| 2.594881 | 1310    | 17.405 | 5.9695  | 1.306168 | 750     | 18.4   | 4.759529 | 0.666918 |
| 0.657404 | 4996    | 18.695 | 7.2595  | 1.588429 | 3156    | 13.625 | 11.51493 | 0.311027 |
| -0.65328 | 2304    | 10.938 | 0.4975  | -0.10886 | 1353    | 12.047 | 11.12577 | 0.193415 |
| 0.021505 | 4968    | 12.581 | 1.1455  | 0.250643 | 3374    | 13.011 | 12.93223 | 0.265264 |
| 0.539469 | 3446    | 11.695 | 0.2595  | 0.05678  | 1926    | 14.434 | 16.054   | 0.371323 |
| -0.62059 | 2286    | 7.4366 | 3.9989  | -0.87499 | 1697    | 7.5427 | 20.8783  | -0.1423  |
| -0.53182 | 2316    | 11.054 | 0.3815  | -0.08347 | 1565    | 7.9233 | 3.2518   | -0.11393 |
| 0.078254 | 4318    | 14.868 | 3.4325  | 0.751055 | 2786    | 11.989 | 0.632    | 0.189092 |
| -0.6112  | 3399    | 10.474 | 0.9615  | -0.21038 | 1971    | 11.01  | 11.176   | 0.116125 |
| -0.35728 | 2431    | 12.999 | 1.5635  | 0.342105 | 1979    | 14.704 | 4.459    | 0.391447 |
| -0.03776 | 2356    | 12.818 | 1.3825  | 0.302501 | 633     | 17.22  | 17.22    | 0.57897  |
| 0.50375  | 4857    | 22.071 | 10.6355 | 2.327121 | 2820    | 19.504 | 19.504   | 0.749202 |
| 0.514107 | 2673    | 13.393 | 1.9575  | 0.428314 | 2348    | 15.204 | 15.204   | 0.428713 |
| -0.59085 | 3812    | 10.388 | 1.0475  | -0.2292  | 3150    | 11.079 | 11.079   | 0.121268 |
| 0.385392 | 4009    | 18.483 | 7.0475  | 1.542042 | 1746    | 13.803 | 13.803   | 0.324293 |
| -0.40649 | 4052    | 20.163 | 8.7275  | 1.909637 | 3069    | 8.8628 | 8.8628   | -0.04391 |
| 0.851215 | 6543    | 25.462 | 14.0265 | 3.069095 | 3853    | 15.91  | 15.91    | 0.481333 |
| -0.25795 | 546     | 26.923 | 15.4875 | 3.388772 | 1773    | 9.0243 | 9.0243   | -0.03187 |
| 0.143393 | 4900    | 19.878 | 8.4425  | 1.847277 | 3734    | 10.364 | 10.364   | 0.067977 |
| -0.5669  | 4626    | 15.543 | 4.1075  | 0.898749 | 3033    | 14.87  | 14.87    | 0.403819 |
| 0.013284 | 4171    | 16.087 | 4.6515  | 1.01778  | 2219    | 6.8049 | 6.8049   | -0.19729 |
| -1.09467 | 2384    | 10.864 | 0.5715  | -0.12505 | 3125    | 3.168  | 3.168    | -0.46836 |
| -0.24353 | 2428    | 13.097 | 1.6615  | 0.363548 | 3007    | 12.537 | 12.537   | 0.229936 |
| -1.00117 | 3214    | 9.4586 | 1.9769  | -0.43256 | 4297    | 9.8208 | 9.8208   | 0.027491 |
| -0.54467 | 1762    | 9.9886 | 1.4469  | -0.31659 | 3601    | 2.8881 | 2.8881   | -0.48922 |
| -0.52575 | 3844    | 11.55  | 0.1145  | 0.025053 | 4265    | 11.77  | 11.77    | 0.172769 |
| -0.48841 | 3542    | 6.1547 | 5.2808  | -1.15548 | 5591    | 7.3511 | 7.3511   | -0.15658 |

|          |      |        |        |          |      |        |        |          |
|----------|------|--------|--------|----------|------|--------|--------|----------|
| -0.62995 | 1413 | 9.1295 | 2.306  | -0.50457 | 2051 | 4.7294 | 4.7294 | -0.35198 |
| -0.52738 | 3204 | 8.7391 | 2.6964 | -0.58999 | 2612 | 6.2404 | 6.2404 | -0.23936 |
| -0.00629 | 1808 | 11.394 | 0.0415 | -0.00908 | 2194 | 11.531 | 11.531 | 0.154956 |
| -1.02374 | 2581 | 7.9427 | 3.4928 | -0.76425 | 2021 | 8.5106 | 8.5106 | -0.07016 |
| 0.106068 | 845  | 11.124 | 0.3115 | -0.06816 | 1317 | 7.5171 | 7.5171 | -0.14421 |
| 0.096726 | 2805 | 6.5241 | 4.9114 | -1.07465 | 1762 | 6.8672 | 6.8672 | -0.19265 |
| 0.278659 | 1250 | 9.12   | 2.3155 | -0.50665 | 925  | 7.2432 | 7.2432 | -0.16462 |
| -0.50274 | 3950 | 7.5443 | 3.8912 | -0.85142 | 3286 | 9.9209 | 9.9209 | 0.034952 |
| -0.41796 | 4601 | 12.606 | 1.1705 | 0.256113 | 2948 | 8.6499 | 8.6499 | -0.05978 |
| -0.60457 | 3029 | 9.9703 | 1.4652 | -0.3206  | 3358 | 9.8571 | 9.8571 | 0.030197 |
| 1.924679 | 3004 | 18.209 | 6.7735 | 1.482088 | 2573 | 19.238 | 19.238 | 0.729376 |
| 0.306135 | 3536 | 7.7489 | 3.6866 | -0.80665 | 2126 | 11.759 | 11.759 | 0.17195  |
| 0.194963 | 4400 | 9.4545 | 1.981  | -0.43346 | 2146 | 8.5741 | 8.5741 | -0.06543 |
| -0.10355 | 2669 | 7.2312 | 4.2043 | -0.91993 | 1418 | 10.79  | 10.79  | 0.099728 |
| -1.06574 | 2558 | 8.5223 | 2.9132 | -0.63743 | 2528 | 7.5949 | 7.5949 | -0.13841 |
| -0.61887 | 3171 | 7.9786 | 3.4569 | -0.75639 | 2325 | 5.8925 | 5.8925 | -0.26529 |
| -0.65419 | 2954 | 7.8538 | 3.5817 | -0.7837  | 3016 | 6.7971 | 6.7971 | -0.19787 |
| -0.19615 | 3586 | 7.1389 | 4.2966 | -0.94013 | 3283 | 13.677 | 13.677 | 0.314902 |
| -0.78734 | 2453 | 9.8247 | 1.6108 | -0.35245 | 1675 | 12.119 | 12.119 | 0.198781 |
| -1.12523 | 2044 | 6.3601 | 5.0754 | -1.11053 | 2189 | 5.5276 | 5.5276 | -0.29249 |
| -1.05969 | 1736 | 6.2788 | 5.1567 | -1.12832 | 2161 | 5.4604 | 5.4604 | -0.2975  |
| -0.54061 | 1492 | 5.496  | 5.9395 | -1.2996  | 1658 | 5.2473 | 5.2473 | -0.31338 |
| -0.71441 | 2530 | 5.8893 | 5.5462 | -1.21355 | 2036 | 7.9568 | 7.9568 | -0.11144 |
| -0.71132 | 1089 | 11.387 | 0.0485 | -0.01061 | 735  | 4.2177 | 4.2177 | -0.39012 |
| -0.4775  | 2257 | 10.058 | 1.3775 | -0.30141 | 1748 | 5.3776 | 5.3776 | -0.30367 |
| -1.01178 | 3226 | 7.0366 | 4.3989 | -0.96251 | 2442 | 7.7805 | 7.7805 | -0.12458 |
| 0.452391 | 1205 | 14.274 | 2.8385 | 0.621083 | 1009 | 10.208 | 10.208 | 0.05635  |
| -0.74674 | 4274 | 7.9785 | 3.457  | -0.75642 | 3016 | 5.504  | 5.504  | -0.29425 |
| -0.85561 | 1114 | 9.605  | 1.8305 | -0.40053 | 1094 | 4.8446 | 4.8446 | -0.3434  |
| -0.50641 | 3610 | 9.6122 | 1.8233 | -0.39895 | 2336 | 8.3904 | 8.3904 | -0.07912 |
| -0.86459 | 3490 | 9.0544 | 2.3811 | -0.521   | 2225 | 6.427  | 6.427  | -0.22546 |
| -1.0847  | 3354 | 9.7496 | 1.6859 | -0.36889 | 1155 | 5.0216 | 5.0216 | -0.3302  |
| -0.31161 | 2878 | 12.682 | 1.2465 | 0.272743 | 1461 | 4.5175 | 4.5175 | -0.36778 |
| 0.183973 | 2768 | 10.188 | 1.2475 | -0.27296 | 1157 | 7.5194 | 7.5194 | -0.14404 |
| 0.697773 | 4316 | 11.608 | 0.1725 | 0.037744 | 5567 | 13.975 | 13.975 | 0.337113 |
| 0.148465 | 637  | 12.716 | 1.2805 | 0.280182 | 1399 | 7.0765 | 7.0765 | -0.17705 |
| -1.23548 | 2838 | 8.7738 | 2.6617 | -0.5824  | 3333 | 10.801 | 10.801 | 0.100548 |
| 0.183127 | 2440 | 10.779 | 0.6565 | -0.14365 | 2519 | 6.4311 | 6.4311 | -0.22515 |
| 0.190736 | 3049 | 9.8721 | 1.5634 | -0.34208 | 3697 | 8.0065 | 8.0065 | -0.10773 |
| 0.459577 | 2794 | 10.773 | 0.6625 | -0.14496 | 4932 | 9.0024 | 9.0024 | -0.03351 |
| -0.34638 | 2183 | 15.712 | 4.2765 | 0.935728 | 2644 | 6.5431 | 6.5431 | -0.2168  |
| 0.33657  | 2200 | 13.864 | 2.4285 | 0.531373 | 3807 | 8.2217 | 8.2217 | -0.09169 |
| -0.13392 | 1781 | 13.981 | 2.5455 | 0.556973 | 2388 | 5.5276 | 5.5276 | -0.29249 |
| 1.225311 | 1371 | 5.0328 | 6.4027 | -1.40095 | 1180 | 5.1695 | 5.1695 | -0.31918 |
| 0.976548 | 1782 | 11.616 | 0.1805 | 0.039495 | 2717 | 9.4958 | 9.4958 | 0.003268 |
| 0.723558 | 4086 | 11.429 | 0.0065 | -0.00142 | 4478 | 8.7539 | 8.7539 | -0.05203 |
| 0.993033 | 1298 | 13.405 | 1.9695 | 0.43094  | 1337 | 11.144 | 11.144 | 0.126112 |



|          |      |        |         |          |      |        |        |          |
|----------|------|--------|---------|----------|------|--------|--------|----------|
| 0.443303 | 2092 | 10.134 | 1.3015  | -0.28478 | 1699 | 5.7681 | 5.7681 | -0.27457 |
| -0.2135  | 1592 | 10.113 | 1.3225  | -0.28937 | 1605 | 9.4081 | 9.4081 | -0.00327 |
| -0.25778 | 3325 | 7.0376 | 4.3979  | -0.96229 | 1904 | 8.3508 | 8.3508 | -0.08207 |
| -0.57282 | 3187 | 9.6015 | 1.834   | -0.40129 | 2082 | 5.0913 | 5.0913 | -0.32501 |
| -0.55141 | 2750 | 8.5818 | 2.8537  | -0.62441 | 2422 | 7.5557 | 7.5557 | -0.14133 |
| -0.25032 | 2777 | 7.4901 | 3.9454  | -0.86328 | 2010 | 6.8657 | 6.8657 | -0.19276 |
| -0.68384 | 3577 | 12.58  | 1.1445  | 0.250424 | 2971 | 4.0727 | 4.0727 | -0.40093 |
| 0.436329 | 3815 | 18.244 | 6.8085  | 1.489747 | 2941 | 14.553 | 14.553 | 0.380193 |
| 0.913142 | 2612 | 16.73  | 5.2945  | 1.158473 | 2890 | 16.782 | 16.782 | 0.546325 |
| 1.05348  | 2345 | 12.708 | 1.2725  | 0.278432 | 2877 | 14.425 | 14.425 | 0.370653 |
| 0.766463 | 2709 | 10.779 | 0.6565  | -0.14365 | 2176 | 9.2371 | 9.2371 | -0.01601 |
| 1.189803 | 1889 | 12.176 | 0.7405  | 0.162027 | 1981 | 9.894  | 9.894  | 0.032947 |
| 2.045996 | 1797 | 25.543 | 14.1075 | 3.086818 | 2968 | 12.466 | 12.466 | 0.224644 |
| 2.041135 | 2528 | 17.642 | 6.2065  | 1.358025 | 2717 | 9.2749 | 9.2749 | -0.0132  |
| 0.179745 | 1636 | 10.147 | 1.2885  | -0.28193 | 1995 | 6.7168 | 6.7168 | -0.20386 |
| 0.248858 | 2220 | 15.315 | 3.8795  | 0.848861 | 1579 | 11.843 | 11.843 | 0.17821  |
| 0.651909 | 2056 | 10.798 | 0.6375  | -0.13949 | 1831 | 7.4823 | 7.4823 | -0.1468  |
| 0.68171  | 2346 | 12.617 | 1.1815  | 0.25852  | 2507 | 10.73  | 10.73  | 0.095256 |
| 1.469635 | 1661 | 12.402 | 0.9665  | 0.211477 | 2328 | 7.4313 | 7.4313 | -0.1506  |
| 0.734337 | 2506 | 12.57  | 1.1345  | 0.248236 | 3411 | 10.613 | 10.613 | 0.086536 |
| 2.553244 | 2208 | 15.987 | 4.5515  | 0.9959   | 2101 | 6.3303 | 6.3303 | -0.23266 |
| 0.19602  | 1241 | 12.248 | 0.8125  | 0.177781 | 2044 | 7.6321 | 7.6321 | -0.13564 |
| 1.699165 | 2279 | 20.667 | 9.2315  | 2.019916 | 2721 | 16.097 | 16.097 | 0.49527  |
| 0.382222 | 2218 | 12.489 | 1.0535  | 0.230513 | 2154 | 7.1959 | 7.1959 | -0.16815 |
| -0.23442 | 2644 | 9.3419 | 2.0936  | -0.45809 | 1439 | 6.3933 | 6.3933 | -0.22797 |
| -0.43162 | 1450 | 11.379 | 0.0565  | -0.01236 | 1362 | 5.7269 | 5.7269 | -0.27764 |
| -0.51874 | 2681 | 10.034 | 1.4015  | -0.30666 | 3245 | 5.0847 | 5.0847 | -0.3255  |
| -1.01208 | 3068 | 10.398 | 1.0375  | -0.22701 | 3533 | 12.737 | 12.737 | 0.244842 |
| 0.132402 | 2504 | 11.102 | 0.3335  | -0.07297 | 1992 | 8.5843 | 8.5843 | -0.06467 |
| -1.36349 | 2586 | 11.64  | 0.2045  | 0.044746 | 1547 | 10.795 | 10.795 | 0.100101 |
| 0.533974 | 2800 | 11.464 | 0.0285  | 0.006236 | 2250 | 9.9556 | 9.9556 | 0.037538 |
| -0.13111 | 1612 | 10.856 | 0.5795  | -0.1268  | 1752 | 12.614 | 12.614 | 0.235675 |
| 0.768576 | 945  | 8.4656 | 2.9699  | -0.64983 | 1628 | 3.0713 | 3.0713 | -0.47556 |
| 0.077873 | 2392 | 13.127 | 1.6915  | 0.370112 | 1867 | 9.6411 | 9.6411 | 0.014098 |
| 0.772803 | 2492 | 10.634 | 0.8015  | -0.17537 | 2172 | 12.155 | 12.155 | 0.201464 |
| 0.125639 | 1272 | 11.557 | 0.1215  | 0.026585 | 1033 | 7.2604 | 7.2604 | -0.16334 |
| -0.26226 | 1600 | 14.313 | 2.8775  | 0.629617 | 751  | 5.4594 | 5.4594 | -0.29757 |
| -1.0375  | 2003 | 8.3874 | 3.0481  | -0.66695 | 1220 | 5.4918 | 5.4918 | -0.29516 |
| -0.84494 | 3840 | 18.828 | 7.3925  | 1.61753  | 1976 | 8.2996 | 8.2996 | -0.08589 |
| 0.582162 | 1701 | 12.992 | 1.5565  | 0.340573 | 1335 | 8.3895 | 8.3895 | -0.07919 |
| -0.5721  | 3290 | 12.036 | 0.6005  | 0.131394 | 2314 | 5.7476 | 5.7476 | -0.27609 |
| -1.0184  | 2442 | 9.1319 | 2.3036  | -0.50404 | 2844 | 3.6568 | 3.6568 | -0.43193 |
| -0.82488 | 2311 | 12.549 | 1.1135  | 0.243641 | 1536 | 8.9193 | 8.9193 | -0.0397  |
| -0.39082 | 2217 | 14.975 | 3.5395  | 0.774467 | 1565 | 10.99  | 10.99  | 0.114634 |
| -0.97095 | 5966 | 19.544 | 8.1085  | 1.774196 | 3852 | 13.266 | 13.266 | 0.28427  |
| -0.62008 | 2475 | 8.9697 | 2.4658  | -0.53953 | 1684 | 5.7007 | 5.7007 | -0.27959 |
| 0.875098 | 2338 | 9.367  | 2.0685  | -0.4526  | 1505 | 4.9834 | 4.9834 | -0.33305 |

|          |      |        |         |          |      |        |        |          |
|----------|------|--------|---------|----------|------|--------|--------|----------|
| 1.363113 | 2288 | 15.428 | 3.9925  | 0.873587 | 4202 | 8.6625 | 8.6625 | -0.05884 |
| 0.651064 | 1580 | 15.823 | 4.3875  | 0.960015 | 2394 | 12.197 | 12.197 | 0.204595 |
| 0.446685 | 1935 | 13.592 | 2.1565  | 0.471857 | 2621 | 10.988 | 10.988 | 0.114485 |
| -0.85614 | 1089 | 11.754 | 0.3185  | 0.06969  | 2086 | 7.814  | 7.814  | -0.12208 |
| 0.671565 | 1499 | 14.076 | 2.6405  | 0.57776  | 2672 | 10.254 | 10.254 | 0.059779 |
| -0.59992 | 1984 | 11.442 | 0.0065  | 0.001422 | 3005 | 5.1913 | 5.1913 | -0.31756 |
| 0.06627  | 1262 | 10.618 | 0.8175  | -0.17887 | 3564 | 10.999 | 10.999 | 0.115305 |
| 0.959005 | 1534 | 10.104 | 1.3315  | -0.29134 | 2195 | 7.3349 | 7.3349 | -0.15779 |
| 0.304655 | 2220 | 19.91  | 8.4745  | 1.854279 | 2969 | 10.071 | 10.071 | 0.046139 |
| -0.3122  | 1610 | 14.534 | 3.0985  | 0.677973 | 2240 | 8.75   | 8.75   | -0.05232 |
| -0.1014  | 1128 | 13.209 | 1.7735  | 0.388054 | 1428 | 6.5826 | 6.5826 | -0.21386 |
| -0.28267 | 1087 | 12.236 | 0.8005  | 0.175155 | 2095 | 7.3508 | 7.3508 | -0.1566  |
| 0.887357 | 1411 | 15.379 | 3.9435  | 0.862865 | 2569 | 12.573 | 12.573 | 0.232619 |
| 1.378331 | 2343 | 15.962 | 4.5265  | 0.990429 | 2551 | 7.8793 | 7.8793 | -0.11721 |
| -0.15151 | 1303 | 9.2095 | 2.226   | -0.48706 | 2179 | 4.0385 | 4.0385 | -0.40348 |
| -0.45095 | 2169 | 10.927 | 0.5085  | -0.11126 | 4343 | 7.4373 | 7.4373 | -0.15016 |
| 0.270416 | 2862 | 14.046 | 2.6105  | 0.571195 | 4571 | 7.832  | 7.832  | -0.12074 |
| -0.81497 | 1090 | 6.6972 | 4.7383  | -1.03677 | 1666 | 5.5822 | 5.5822 | -0.28842 |
| -0.83505 | 1174 | 3.5775 | 7.858   | -1.71938 | 1333 | 6.1515 | 6.1515 | -0.24599 |
| -0.73544 | 3163 | 10.433 | 1.0025  | -0.21935 | 5137 | 6.4045 | 6.4045 | -0.22713 |
| -0.34921 | 3547 | 21.398 | 9.9625  | 2.179864 | 3656 | 13.211 | 13.211 | 0.28017  |
| -0.45518 | 2603 | 9.9501 | 1.4854  | -0.32502 | 4331 | 7.9427 | 7.9427 | -0.11249 |
| -0.56739 | 2633 | 13.787 | 2.3515  | 0.514524 | 4694 | 8.5002 | 8.5002 | -0.07094 |
| 0.081804 | 1971 | 10.096 | 1.3395  | -0.29309 | 2866 | 9.1068 | 9.1068 | -0.02572 |
| -0.97881 | 2685 | 12.663 | 1.2275  | 0.268585 | 5434 | 14.667 | 14.667 | 0.388689 |
| -1.06908 | 2200 | 10.682 | 0.7535  | -0.16487 | 4207 | 6.9408 | 6.9408 | -0.18716 |
| 0.0255   | 1507 | 17.651 | 6.2155  | 1.359994 | 2428 | 11.326 | 11.326 | 0.139677 |
| -0.12796 | 1823 | 16.182 | 4.7465  | 1.038567 | 3232 | 11.881 | 11.881 | 0.181043 |
| -1.1435  | 2145 | 19.627 | 8.1915  | 1.792357 | 3422 | 12.478 | 12.478 | 0.225538 |
| -0.67522 | 1629 | 7.919  | 3.5165  | -0.76943 | 2093 | 6.0201 | 6.0201 | -0.25578 |
| -0.79916 | 1616 | 10.149 | 1.2865  | -0.2815  | 3076 | 7.6398 | 7.6398 | -0.13506 |
| -0.71572 | 2281 | 8.1982 | 3.2373  | -0.70834 | 3174 | 12.193 | 12.193 | 0.204297 |
| -1.18553 | 2592 | 8.6806 | 2.7549  | -0.60279 | 3177 | 10.261 | 10.261 | 0.0603   |
| -0.85436 | 2592 | 9.9923 | 1.4432  | -0.31578 | 3599 | 8.8636 | 8.8636 | -0.04385 |
| -1.09723 | 3325 | 21.564 | 10.1285 | 2.216186 | 2424 | 15.635 | 15.635 | 0.460837 |
| -0.82516 | 2106 | 11.159 | 0.2765  | -0.0605  | 3426 | 6.2755 | 6.2755 | -0.23675 |
| -0.56604 | 2311 | 13.76  | 2.3245  | 0.508617 | 4261 | 12.509 | 12.509 | 0.227849 |
| -0.94903 | 2072 | 8.1564 | 3.2791  | -0.71749 | 2360 | 5.8051 | 5.8051 | -0.27181 |
| -0.57422 | 2087 | 13.129 | 1.6935  | 0.370549 | 2860 | 12.343 | 12.343 | 0.215476 |
| -0.70405 | 4026 | 11.451 | 0.0155  | 0.003392 | 3813 | 10.333 | 10.333 | 0.065667 |
| 0.934488 | 4393 | 12.429 | 0.9935  | 0.217385 | 5126 | 8.1545 | 8.1545 | -0.0967  |
| 0.517066 | 1816 | 9.4163 | 2.0192  | -0.44181 | 2211 | 12.121 | 12.121 | 0.19893  |
| 0.290917 | 4483 | 22.485 | 11.0495 | 2.417707 | 4581 | 24.427 | 24.427 | 1.116124 |
| 0.687839 | 3447 | 25.471 | 14.0355 | 3.071064 | 3949 | 19.929 | 19.929 | 0.780878 |
| -0.66038 | 2978 | 8.8314 | 2.6041  | -0.5698  | 3749 | 19.152 | 19.152 | 0.722966 |
| 0.747018 | 1815 | 8.8154 | 2.6201  | -0.5733  | 2049 | 12.982 | 12.982 | 0.263103 |
| -0.55798 | 3183 | 12.033 | 0.5975  | 0.130737 | 3194 | 8.9543 | 8.9543 | -0.03709 |

|          |      |        |         |          |      |        |        |          |
|----------|------|--------|---------|----------|------|--------|--------|----------|
| -0.37531 | 2017 | 6.7427 | 4.6928  | -1.02682 | 869  | 7.71   | 7.71   | -0.12983 |
| -0.21838 | 1854 | 11.866 | 0.4305  | 0.094196 | 1989 | 12.117 | 12.117 | 0.198632 |
| -0.71853 | 2051 | 13.164 | 1.7285  | 0.378208 | 1718 | 9.6042 | 9.6042 | 0.011348 |
| -0.31436 | 3034 | 15.425 | 3.9895  | 0.87293  | 3353 | 13.868 | 13.868 | 0.329138 |
| -0.08341 | 3341 | 11.494 | 0.0585  | 0.0128   | 3230 | 16.966 | 16.966 | 0.560039 |
| -0.65806 | 2223 | 15.655 | 4.2195  | 0.923256 | 2968 | 8.0526 | 8.0526 | -0.1043  |
| -0.79322 | 1273 | 10.134 | 1.3015  | -0.28478 | 1435 | 11.568 | 11.568 | 0.157714 |
| -0.04201 | 1975 | 15.241 | 3.8055  | 0.83267  | 2464 | 17.248 | 17.248 | 0.581057 |
| -0.29014 | 4288 | 14.179 | 2.7435  | 0.600297 | 3092 | 12.387 | 12.387 | 0.218756 |
| -0.90061 | 3153 | 8.817  | 2.6185  | -0.57295 | 2560 | 5.9766 | 5.9766 | -0.25903 |
| -1.55113 | 2728 | 8.7977 | 2.6378  | -0.57717 | 1803 | 4.437  | 4.437  | -0.37378 |
| -0.5951  | 3064 | 6.1684 | 5.2671  | -1.15248 | 2859 | 5.6663 | 5.6663 | -0.28215 |
| -0.58172 | 1336 | 7.7096 | 3.7259  | -0.81525 | 1527 | 3.7328 | 3.7328 | -0.42626 |
| 2.069668 | 4753 | 19.398 | 7.9625  | 1.74225  | 5585 | 17.44  | 17.44  | 0.595367 |
| 5.643019 | 2611 | 19.763 | 8.3275  | 1.822114 | 2251 | 14.438 | 14.438 | 0.371621 |
| 1.140769 | 3787 | 14.154 | 2.7185  | 0.594827 | 3787 | 9.9551 | 9.9551 | 0.037501 |
| 0.234486 | 3709 | 15.179 | 3.7435  | 0.819104 | 2491 | 20.112 | 20.112 | 0.794517 |
| 3.157926 | 2182 | 25.298 | 13.8625 | 3.033211 | 1550 | 26.968 | 26.968 | 1.30551  |
| 5.651051 | 1840 | 25.272 | 13.8365 | 3.027522 | 2015 | 20.695 | 20.695 | 0.83797  |
| 5.243562 | 1490 | 18.389 | 6.9535  | 1.521474 | 1254 | 19.617 | 19.617 | 0.757624 |
| 4.87792  | 2627 | 15.683 | 4.2475  | 0.929382 | 2990 | 16.355 | 16.355 | 0.5145   |
| 5.464849 | 2697 | 15.647 | 4.2115  | 0.921505 | 2541 | 11.924 | 11.924 | 0.184247 |
| 5.610048 | 2040 | 23.333 | 11.8975 | 2.603255 | 3197 | 18.799 | 18.799 | 0.696656 |
| 3.741262 | 1693 | 27.23  | 15.7945 | 3.455945 | 1660 | 20.904 | 20.904 | 0.853547 |
| 6.645469 | 2312 | 18.339 | 6.9035  | 1.510533 | 1765 | 16.034 | 16.034 | 0.490575 |
| 5.603919 | 1530 | 23.137 | 11.7015 | 2.560369 | 1475 | 28.881 | 28.881 | 1.44809  |
| 5.795194 | 812  | 27.833 | 16.3975 | 3.587886 | 520  | 25.577 | 25.577 | 1.201836 |
| 1.506833 | 1919 | 16.936 | 5.5005  | 1.203547 | 1206 | 22.637 | 22.637 | 0.982711 |
| 5.984144 | 2124 | 25.141 | 13.7055 | 2.998858 | 1382 | 27.424 | 27.424 | 1.339497 |
| 2.384795 | 3085 | 19.643 | 8.2075  | 1.795858 | 1909 | 26.768 | 26.768 | 1.290604 |
| 2.031413 | 3162 | 26.344 | 14.9085 | 3.262083 | 1543 | 15.036 | 15.036 | 0.416192 |
| 1.193608 | 3685 | 19.213 | 7.7775  | 1.701771 | 2823 | 17.57  | 17.57  | 0.605056 |
| 1.792372 | 2239 | 15.766 | 4.3305  | 0.947543 | 2362 | 16.3   | 16.3   | 0.5104   |
| 1.515499 | 4176 | 21.193 | 9.7575  | 2.135008 | 4295 | 18.184 | 18.184 | 0.650819 |
| 1.639141 | 2137 | 20.73  | 9.2945  | 2.033701 | 1706 | 11.958 | 11.958 | 0.186781 |
| 2.156745 | 2188 | 23.446 | 12.0105 | 2.62798  | 1556 | 19.602 | 19.602 | 0.756506 |
| 0.427452 | 3648 | 12.473 | 1.0375  | 0.227012 | 3366 | 15.894 | 15.894 | 0.48014  |
| 3.052672 | 2537 | 16.949 | 5.5135  | 1.206392 | 1853 | 20.399 | 20.399 | 0.815908 |
| 4.036945 | 1152 | 17.795 | 6.3595  | 1.391502 | 796  | 18.97  | 18.97  | 0.709402 |
| 3.92535  | 622  | 32.476 | 21.0405 | 4.603806 | 549  | 30.237 | 30.237 | 1.549156 |
| 1.132949 | 1707 | 21.675 | 10.2395 | 2.240473 | 670  | 18.507 | 18.507 | 0.674893 |
| 4.192712 | 828  | 27.174 | 15.7385 | 3.443692 | 816  | 28.309 | 28.309 | 1.405458 |
| 3.016319 | 2166 | 19.898 | 8.4625  | 1.851653 | 1747 | 15.799 | 15.799 | 0.47306  |
| 2.514144 | 1852 | 20.788 | 9.3525  | 2.046391 | 2355 | 18.854 | 18.854 | 0.700756 |
| 2.750226 | 1757 | 13.546 | 2.1105  | 0.461792 | 1919 | 14.851 | 14.851 | 0.402403 |
| 3.137214 | 2446 | 18.275 | 6.8395  | 1.49653  | 1595 | 22.382 | 22.382 | 0.963705 |
| 2.879785 | 1212 | 21.287 | 9.8515  | 2.155576 | 969  | 20.743 | 20.743 | 0.841547 |

|          |      |        |         |          |      |        |        |          |
|----------|------|--------|---------|----------|------|--------|--------|----------|
| 1.817523 | 917  | 30.098 | 18.6625 | 4.083484 | 792  | 24.747 | 24.747 | 1.139974 |
| 1.530928 | 3759 | 11.865 | 0.4295  | 0.093978 | 2173 | 18.086 | 18.086 | 0.643515 |
| 3.065776 | 2382 | 14.777 | 3.3415  | 0.731143 | 1618 | 17.12  | 17.12  | 0.571517 |
| 2.828004 | 2919 | 14.834 | 3.3985  | 0.743615 | 2791 | 13.436 | 13.436 | 0.29694  |
| 0.550459 | 2127 | 13.587 | 2.1515  | 0.470763 | 2232 | 11.918 | 11.918 | 0.1838   |
| 2.098834 | 3696 | 14.475 | 3.0395  | 0.665064 | 2485 | 10.101 | 10.101 | 0.048375 |
| -1.40697 | 4480 | 6.5179 | 4.9176  | -1.076   | 3394 | 7.2775 | 7.2775 | -0.16207 |
| -0.41633 | 3285 | 24.384 | 12.9485 | 2.833221 | 2492 | 22.552 | 22.552 | 0.976376 |
| -0.3996  | 2621 | 3.0141 | 8.4214  | -1.84266 | 2481 | 3.0633 | 3.0633 | -0.47616 |
| 0.343544 | 2773 | 7.2485 | 4.187   | -0.91614 | 2664 | 8.9715 | 8.9715 | -0.03581 |
| -0.08962 | 2987 | 9.5079 | 1.9276  | -0.42177 | 2720 | 7.5735 | 7.5735 | -0.14001 |
| 0.013136 | 1394 | 6.3128 | 5.1227  | -1.12088 | 1165 | 5.4936 | 5.4936 | -0.29502 |
| -0.56251 | 2158 | 5.329  | 6.1065  | -1.33614 | 1385 | 7.2202 | 7.2202 | -0.16634 |
| -0.0917  | 2079 | 8.177  | 3.2585  | -0.71298 | 1792 | 6.4732 | 6.4732 | -0.22201 |
| -0.85935 | 2342 | 11.401 | 0.0345  | -0.00755 | 2167 | 12.875 | 12.875 | 0.255128 |
| 0.338261 | 2290 | 12.62  | 1.1845  | 0.259177 | 2467 | 9.3231 | 9.3231 | -0.0096  |
| 0.264287 | 1417 | 7.41   | 4.0255  | -0.88081 | 2285 | 7.6149 | 7.6149 | -0.13692 |
| -1.09693 | 2191 | 10.726 | 0.7095  | -0.15524 | 2258 | 13.508 | 13.508 | 0.302306 |
| -0.08341 | 1410 | 5.5319 | 5.9036  | -1.29175 | 1518 | 6.3241 | 6.3241 | -0.23313 |
| 0.461057 | 2008 | 4.4821 | 6.9534  | -1.52145 | 1556 | 5.0129 | 5.0129 | -0.33085 |
| -0.50487 | 3176 | 9.5718 | 1.8637  | -0.40779 | 2790 | 9.2473 | 9.2473 | -0.01525 |
| 0.435483 | 1605 | 9.9065 | 1.529   | -0.33456 | 990  | 9.1919 | 9.1919 | -0.01938 |
| 0.859035 | 2437 | 9.3968 | 2.0387  | -0.44608 | 1029 | 7.1914 | 7.1914 | -0.16848 |
| 0.053948 | 2050 | 13.463 | 2.0275  | 0.443631 | 1333 | 7.7269 | 7.7269 | -0.12857 |
| -0.48748 | 1995 | 12.18  | 0.7445  | 0.162902 | 1629 | 9.9448 | 9.9448 | 0.036733 |
| -0.70513 | 1816 | 8.7004 | 2.7351  | -0.59846 | 1840 | 4.837  | 4.837  | -0.34396 |
| -0.72662 | 2431 | 5.2242 | 6.2113  | -1.35908 | 1812 | 6.3466 | 6.3466 | -0.23145 |
| -0.10514 | 3935 | 24.676 | 13.2405 | 2.897113 | 3184 | 23.367 | 23.367 | 1.03712  |
| -1.01163 | 2902 | 4.1351 | 7.3004  | -1.59738 | 3890 | 3.4704 | 3.4704 | -0.44582 |
| -1.0181  | 3297 | 11.526 | 0.0905  | 0.019802 | 2237 | 9.2535 | 9.2535 | -0.01479 |
| -0.969   | 2733 | 10.209 | 1.2265  | -0.26837 | 2448 | 6.5768 | 6.5768 | -0.21429 |
| -0.4407  | 2320 | 5.4741 | 5.9614  | -1.3044  | 2467 | 4.7021 | 4.7021 | -0.35402 |
| 0.985425 | 3014 | 21.964 | 10.5285 | 2.303708 | 2788 | 24.032 | 24.032 | 1.086684 |
| 0.35686  | 3570 | 10.252 | 1.1835  | -0.25896 | 4230 | 12.199 | 12.199 | 0.204744 |
| -0.43536 | 2384 | 12.878 | 1.4425  | 0.315629 | 2205 | 11.655 | 11.655 | 0.164198 |
| -0.08631 | 2380 | 10.882 | 0.5535  | -0.12111 | 2848 | 6.4256 | 6.4256 | -0.22556 |
| 0.327904 | 906  | 2.5386 | 8.8969  | -1.9467  | 1378 | 5.8781 | 5.8781 | -0.26637 |
| 0.091949 | 1660 | 11.024 | 0.4115  | -0.09004 | 2270 | 6.2115 | 6.2115 | -0.24152 |
| -0.20991 | 1697 | 7.8374 | 3.5981  | -0.78729 | 2658 | 8.0512 | 8.0512 | -0.1044  |
| 0.006288 | 1669 | 5.7519 | 5.6836  | -1.24361 | 2493 | 5.9767 | 5.9767 | -0.25902 |
| 0.402089 | 1234 | 9.1572 | 2.2783  | -0.49851 | 1478 | 7.2395 | 7.2395 | -0.1649  |
| 0.024443 | 2388 | 11.683 | 0.2475  | 0.054155 | 3694 | 6.3346 | 6.3346 | -0.23234 |
| -0.87622 | 2798 | 10.758 | 0.6775  | -0.14824 | 4189 | 10.026 | 10.026 | 0.042785 |
| -0.68801 | 3000 | 7.5667 | 3.8688  | -0.84652 | 4936 | 6.1791 | 6.1791 | -0.24393 |
| -0.92692 | 3409 | 8.5362 | 2.8993  | -0.63439 | 3576 | 4.5861 | 4.5861 | -0.36266 |
| -0.72483 | 3056 | 9.6531 | 1.7824  | -0.39    | 4010 | 3.7406 | 3.7406 | -0.42568 |
| 0.428508 | 2636 | 5.1214 | 6.3141  | -1.38157 | 3508 | 6.0433 | 6.0433 | -0.25405 |

|          |      |         |         |          |      |         |          |          |
|----------|------|---------|---------|----------|------|---------|----------|----------|
| -0.72128 | 1953 | 6.6564  | 4.7791  | -1.0457  | 3167 | 13.167  | 13.167   | 0.276891 |
| 0.253931 | 3342 | 5.9545  | 5.481   | -1.19928 | 3822 | 5.102   | 5.102    | -0.32421 |
| 0.248224 | 2623 | 7.5105  | 3.925   | -0.85882 | 4423 | 9.7219  | 9.7219   | 0.02012  |
| -1.0933  | 1695 | 7.6696  | 3.7659  | -0.824   | 2091 | 4.3998  | 4.3998   | -0.37655 |
| -1.11744 | 3242 | 7.0327  | 4.4028  | -0.96336 | 3081 | 7.9844  | 7.9844   | -0.10938 |
| -0.39488 | 2785 | 5.8528  | 5.5827  | -1.22153 | 3980 | 4.7487  | 4.7487   | -0.35054 |
| 0.686571 | 2700 | 6.5926  | 4.8429  | -1.05966 | 2940 | 15.51   | 15.51    | 0.45152  |
| 1.170359 | 2708 | 4.9483  | 6.4872  | -1.41944 | 3200 | 8.1875  | 8.1875   | -0.09424 |
| 1.612933 | 768  | 6.1198  | 5.3157  | -1.16311 | 833  | 11.765  | 11.765   | 0.172397 |
| 2.627641 | 1142 | 7.7933  | 3.6422  | -0.79694 | 717  | 6.2762  | 6.2762   | -0.2367  |
| -0.221   | 1199 | 4.3369  | 7.0986  | -1.55322 | 2301 | 4.9978  | 4.9978   | -0.33198 |
| 0.327904 | 3996 | 5.8308  | 5.6047  | -1.22635 | 2661 | 6.0128  | 6.0128   | -0.25633 |
| 0.884609 | 2404 | 4.5341  | 6.9014  | -1.51007 | 2493 | 5.1344  | 5.1344   | -0.3218  |
| 0.391099 | 2840 | 6.1268  | 5.3087  | -1.16158 | 1976 | 3.7449  | 3.7449   | -0.42536 |
| -0.82241 | 4326 | 4.4614  | 6.9741  | -1.52598 | 3936 | 7.1138  | 7.1138   | -0.17427 |
| -0.67613 | 3943 | 15.876  | 4.4405  | 0.971612 | 2728 | 12.647  | 12.647   | 0.238134 |
| -0.45341 | 5026 | 10.744  | 0.6915  | -0.1513  | 3102 | 6.383   | 6.383    | -0.22874 |
| -0.00889 | 4569 | 9.258   | 2.1775  | -0.47645 | 4696 | 5.4514  | 5.4514   | -0.29817 |
| -1.01666 | 2564 | 3.3541  | 8.0814  | -1.76827 | 2843 | 5.5575  | 5.5575   | -0.29026 |
| -0.70923 | 2153 | 6.2239  | 5.2116  | -1.14033 | 2400 | 10.167  | 10.167   | 0.053294 |
| 0.03816  | 4346 | 14.082  | 2.6465  | 0.579072 | 4864 | 17.373  | 17.373   | 0.590374 |
| 0.414559 | 2593 | 11.994  | 0.5585  | 0.122204 | 2702 | 14.064  | 14.064   | 0.343746 |
| -0.04921 | 2622 | 6.7887  | 4.6468  | -1.01675 | 2655 | 9.6422  | 9.6422   | 0.01418  |
| -0.61099 | 5398 | 13.097  | 1.6615  | 0.363548 | 4341 | 14.029  | 14.029   | 0.341138 |
| -0.74974 | 2078 | 6.9297  | 4.5058  | -0.9859  | 2106 | 7.6448  | 7.6448   | -0.13469 |
| -0.30804 | 4229 | 11.114  | 0.3215  | -0.07035 | 4997 | 15.129  | 15.129   | 0.423123 |
| -0.60285 | 3886 | 12.069  | 0.6335  | 0.138614 | 3256 | 11.886  | 11.886   | 0.181415 |
| 0.125216 | 2488 | 8.7621  | 2.6734  | -0.58496 | 1740 | 6.8391  | 6.8391   | -0.19474 |
| -0.88753 | 2103 | 4.1845  | 7.251   | -1.58657 | 1554 | 5.4054  | 5.4054   | -0.3016  |
| -0.51768 | 3527 | 9.2713  | 2.1642  | -0.47354 | 5060 | 10.119  | 10.119   | 0.049717 |
| 0.053187 | 2509 | 7.6126  | 3.8229  | -0.83648 | 2938 | 6.8414  | 6.8414   | -0.19457 |
| -1.08345 | 3307 | 12.156  | 0.7205  | 0.15765  | 4604 | 14.466  | 14.466   | 0.373708 |
| -0.45831 | 969  | 6.6047  | 4.8308  | -1.05701 | 1768 | 6.2783  | 6.2783   | -0.23654 |
| -1.13675 | 2242 | 5.7984  | 5.6371  | -1.23344 | 3418 | 5.1492  | 5.1492   | -0.32069 |
| -0.95357 | 3289 | 4.2566  | 7.1789  | -1.57079 | 2906 | 2.8906  | 2.8906   | -0.48903 |
| -1.01408 | 2874 | 8.1768  | 3.2587  | -0.71303 | 3074 | 5.4001  | 5.4001   | -0.30199 |
| -1.30803 | 901  | 9.101   | 2.3345  | -0.5108  | 2063 | 4.7504  | 4.7504   | -0.35042 |
| -0.91536 | 3773 | 6.4405  | 4.995   | -1.09294 | 2986 | 4.2867  | 4.2867   | -0.38498 |
| -0.37017 | 2934 | 6.2031  | 5.2324  | -1.14489 | 1746 | 1.3746  | 1.3746   | -0.60202 |
|          |      | 11.4355 | 3.088   |          |      | 9.45195 | 9.06555  |          |
|          |      |         | 9.264   |          |      |         | 27.19665 |          |
|          |      |         | 4.57024 |          |      |         | 13.41701 |          |
|          | 3778 | 34.966  | 3572    | 37.962   | 2013 | 31.446  |          |          |
|          | 2134 | 24.93   | 3242    | 40.253   | 1256 | 25.159  |          |          |
|          | 2522 | 41.911  | 3762    | 45.295   | 1969 | 30.066  |          |          |

|           |          |          |          |          |          |          |
|-----------|----------|----------|----------|----------|----------|----------|
|           | 1809     | 39.912   | 2741     | 33.966   | 3680     | 38.886   |
| mn        | 2560.75  | 35.42975 | 3329.25  | 39.369   | 2229.5   | 31.38925 |
| sd        | 862.2534 | 7.584128 | 447.158  | 4.728319 | 1027.357 | 5.679539 |
|           | 245      | 6.5306   | 1217     | 9.9425   | 1123     | 8.1033   |
|           | 410      | 4.1463   | 1000     | 11.3     | 1581     | 3.8583   |
|           | 570      | 4.7368   | 960      | 8.75     | 1275     | 5.2549   |
|           | 716      | 5.4469   | 1516     | 7.124    | 1478     | 7.7808   |
| mn        | 485.25   | 5.21515  | 1173.25  | 9.279125 | 1364.25  | 6.249325 |
| sd        | 203.1508 | 1.025569 | 254.8743 | 1.774687 | 205.0096 | 2.040304 |
| 3posSD    |          | 22.75238 |          | 14.18496 |          | 17.03862 |
| 3negSD    |          | 3.076707 |          | 5.32406  |          | 6.120912 |
| Sum3SD    |          | 25.82909 |          | 19.50902 |          | 23.15953 |
| MnDiff    |          | 30.2146  |          | 30.08988 |          | 25.13993 |
| SumovrMn  |          | 0.854855 |          | 0.648358 |          | 0.921225 |
| 1minus    |          | 0.145145 |          | 0.351642 |          | 0.078775 |
| PLK1 SMAR | 220      | 19.545   | 195      | 27.692   | 82       | 30.488   |
| PLK1 SMAR | 104      | 37.5     | 108      | 42.593   | 95       | 28.421   |
|           | 2160     | 22.037   | 2398     | 39.283   | 2740     | 4.6715   |
|           | 2506     | 31.445   | 1906     | 28.751   | 2166     | 11.357   |
|           | 2125     | 46.447   | 5825     | 49.923   | 6486     | 22.186   |
|           | 5078     | 55.849   | 4589     | 53.192   | 4347     | 19.163   |

x toxic a,b,c





X toxic b



x toxic a,c  
x toxic a,b

x toxic a  
x toxic a,b,c

x toxic a,b,c  
x toxic a,b,c

x toxic a,c

x toxic a,c

X toxic a,c

x toxic a,b,c

x toxic a,b,c

x toxic a,b

x toxic a,b

|           |                        |                | cell ct | % inf  | AD     |
|-----------|------------------------|----------------|---------|--------|--------|
| 50062 A02 | M-020388- ectonucleo   | 57089 ENTPD7   | 2091    | 11.143 | 0.825  |
| 50062 A04 | M-021172- phospholip   | 57088 PLSCR4   | 2256    | 13.475 | 3.157  |
| 50062 A05 | M-013484- testis expr  | 56154 TEX15    | 801     | 14.107 | 3.789  |
| 50062 A06 | M-007416- solute carri | 57084 SLC17A6  | 1636    | 17.848 | 7.53   |
| 50062 A07 | M-013485- testis expr  | 56156 TEX13B   | 1451    | 15.713 | 5.395  |
| 50062 A08 | M-010397- DEAD (Asp-   | 57062 DDX24    | 1198    | 15.943 | 5.625  |
| 50062 A09 | M-010167- testis expr  | 56157 TEX13A   | 876     | 23.744 | 13.426 |
| 50062 A10 | M-013200- T-box 20     | 57057 TBX20    | 1892    | 22.516 | 12.198 |
| 50062 A11 | M-013487- testis expr  | 56158 TEX12    | 2703    | 23.307 | 12.989 |
| 50062 A12 | M-020970- disrupter o  | 57050 SAS10    | 1196    | 18.98  | 8.662  |
| 50062 A13 | M-013488- testis expr  | 56159 TEX11    | 1301    | 14.527 | 4.209  |
| 50062 A14 | M-031983- phospholip   | 57047 PLSCR2   | 749     | 26.035 | 15.717 |
| 50062 A15 | M-017227- necdin-like  | 56160 NDNL2    | 1896    | 13.66  | 3.342  |
| 50062 A16 | M-016732- twisted gas  | 57045 TWSG1    | 1506    | 14.874 | 4.556  |
| 50062 A17 | M-007026- ring finger  | 56163 RNF17    | 3100    | 13.161 | 2.843  |
| 50062 A18 | M-013767- arginyl-tRN  | 57038 RARS2    | 1155    | 13.939 | 3.621  |
| 50062 A19 | M-013489- tudor domi   | 56165 TDRD1    | 1007    | 17.875 | 7.557  |
| 50062 A20 | M-013766- ankyrin rep  | 57037 ANKMY2   | 1393    | 14.645 | 4.327  |
| 50062 A21 | M-014716- melanoma-    | 56169 MLZE     | 2358    | 19.169 | 8.851  |
| 50062 A23 | M-009928- dynein, axc  | 56171 DNAH7    | 1899    | 18.167 | 7.849  |
| 50062 B02 | M-024217- KIAA1345 p   | 57545 KIAA1345 | 3452    | 10.689 | 0.371  |
| 50062 B04 | M-021960- KIAA1344     | 57544 KIAA1344 | 2156    | 11.085 | 0.767  |
| 50062 B05 | M-020509- chromosom    | 57091 C20orf32 | 1922    | 14.932 | 4.614  |
| 50062 B06 | M-027054- kelch doma   | 57542 KLHDC5   | 3362    | 15.616 | 5.298  |
| 50062 B07 | M-020263- PEST prote   | 57092 PCNP     | 2945    | 14.363 | 4.045  |
| 50062 B08 | M-021564- patched dc   | 57540 PTCHD2   | 1196    | 16.054 | 5.736  |
| 50062 B09 | M-007030- tripartite r | 57093 TRIM49   | 2766    | 15.51  | 5.192  |
| 50062 B10 | M-014053- WD repeat    | 57539 WDR35    | 5043    | 15.467 | 5.149  |
| 50062 B11 | M-015482- chromosom    | 57095 C1orf128 | 1543    | 16.202 | 5.884  |
| 50062 B12 | M-023424- KIAA1328     | 57536 KIAA1328 | 3332    | 15.276 | 4.958  |
| 50062 B13 | M-016115- poly (ADP-r  | 57097 PARP11   | 3601    | 12.608 | 2.29   |
| 50062 B14 | M-010726- KIAA1324     | 57535 KIAA1324 | 4346    | 12.954 | 2.636  |
| 50062 B15 | M-007031- transmemk    | 57101 TMEM16B  | 3095    | 21.357 | 11.039 |
| 50062 B16 | M-014032- TBC1 doma    | 57533 TBC1D14  | 2689    | 19.115 | 8.797  |
| 50062 B17 | M-016596- chromosom    | 57102 C12orf4  | 4285    | 23.617 | 13.299 |
| 50062 B18 | M-007193- HECT doma    | 57531 HACE1    | 2993    | 17.34  | 7.022  |
| 50062 B19 | M-020597- chromosom    | 57103 C12orf5  | 4349    | 16.142 | 5.824  |
| 50062 B20 | M-014025- cingulin     | 57530 CGN      | 5527    | 11.326 | 1.008  |
| 50062 B21 | M-009003- patatin-like | 57104 PNPLA2   | 3695    | 17.564 | 7.246  |
| 50062 B23 | M-009507- N-acetyltra  | 57106 NAT14    | 2361    | 11.902 | 1.584  |
| 50062 C02 | M-015879- chromosom    | 57035 C1orf63  | 1729    | 9.2539 | 1.0641 |
| 50062 C04 | M-007417- solute carri | 57030 SLC17A7  | 1661    | 7.5256 | 2.7924 |
| 50062 C05 | M-020537- motile sper  | 56180 MOSPD1   | 2023    | 10.331 | 0.013  |
| 50062 C06 | M-018658- esophagea    | 57020 MGC16824 | 3013    | 7.7332 | 2.5848 |
| 50062 C07 | M-017152- family with  | 56181 FAM54B   | 1947    | 6.5742 | 3.7438 |
| 50062 C08 | M-020666- cytokine in  | 57019 CIAPIN1  | 1496    | 7.6203 | 2.6977 |

|           |                        |                 |      |        |        |
|-----------|------------------------|-----------------|------|--------|--------|
| 50062 C09 | M-023261- leiomodin    | 56203 LMOD3     | 2017 | 6.8914 | 3.4266 |
| 50062 C10 | M-022565- coenzyme     | 57017 COQ9      | 2319 | 5.4765 | 4.8415 |
| 50062 C11 | M-022243- KIAA1370     | 56204 KIAA1370  | 1517 | 7.2512 | 3.0668 |
| 50062 C12 | M-016924- calcium bir  | 57010 CABP4     | 1760 | 7.5    | 2.818  |
| 50062 C13 | M-010716- sushi doma   | 56241 SUSD2     | 833  | 8.5234 | 1.7946 |
| 50062 C14 | M-010719- coiled-coil  | 57003 CCDC47    | 1928 | 4.8755 | 5.4425 |
| 50062 C15 | M-014084- zinc finger  | 56242 ZNF253    | 1322 | 7.9425 | 2.3755 |
| 50062 C16 | M-020924- chromoson    | 57002 C7orf36   | 2099 | 6.8604 | 3.4576 |
| 50062 C17 | M-021358- butyrophili  | 56244 BTNL2     | 1298 | 3.3898 | 6.9282 |
| 50062 C18 | M-007390- solute carri | 56996 SLC12A9   | 3913 | 16.228 | 5.91   |
| 50062 C19 | M-021062- chromoson    | 56245 C21orf62  | 1331 | 8.1142 | 2.2038 |
| 50062 C20 | M-013785- tubby like p | 56995 TULP4     | 2430 | 8.1481 | 2.1699 |
| 50062 C21 | M-018522- melanocor    | 56246 MRAP      | 3107 | 10.943 | 0.625  |
| 50062 C23 | M-007027- ring finger  | 56254 RNF20     | 3202 | 10.587 | 0.269  |
| 50062 D02 | M-014024- retrotransp  | 57529 RGAG1     | 3907 | 12.798 | 2.48   |
| 50062 D04 | M-024347- potassium    | 57528 KCTD16    | 2980 | 8.6913 | 1.6267 |
| 50062 D05 | M-008671- peptidogly   | 57115 PGLYRP4   | 2254 | 8.6957 | 1.6223 |
| 50062 D06 | M-024773- protocadhe   | 57526 PCDH19    | 2053 | 5.7964 | 4.5216 |
| 50062 D07 | M-013202- zinc finger  | 57116 ZNF695    | 1352 | 6.5828 | 3.7352 |
| 50062 D08 | M-014020- CASK inter   | 57524 CASKIN1   | 1502 | 4.1278 | 6.1902 |
| 50062 D09 | M-015624- integrator   | 57117 INTS12    | 2416 | 9.851  | 0.467  |
| 50062 D10 | M-030275- KIAA1305     | 57523 KIAA1305  | 1459 | 5.5517 | 4.7663 |
| 50062 D11 | M-013193- serine pept  | 57119 SPINLW1   | 3449 | 7.2775 | 3.0405 |
| 50062 D12 | M-026974- SLIT-ROBO    | 57522 SRGAP1    | 891  | 5.8361 | 4.4819 |
| 50062 D13 | M-020440- nucleopori   | 57122 NUP107    | 1482 | 5.8704 | 4.4476 |
| 50062 D14 | M-007192- HECT, C2 ai  | 57520 HECW2     | 1887 | 9.168  | 1.15   |
| 50062 D15 | M-010720- CD248 mol    | 57124 CD248     | 2142 | 6.8627 | 3.4553 |
| 50062 D16 | M-022228- START dom    | 57519 STARD9    | 2047 | 7.6209 | 2.6971 |
| 50062 D17 | M-015628- plexin dom   | 57125 PLXDC1    | 1103 | 10.245 | 0.073  |
| 50062 D18 | M-010725- serine inco  | 57515 SERINC1   | 2276 | 6.239  | 4.079  |
| 50062 D19 | M-020431- CD177 mol    | 57126 CD177     | 3081 | 12.009 | 1.691  |
| 50062 D20 | M-023577- Cdc42 GTP    | 57514 CDGAP     | 2882 | 12.006 | 1.688  |
| 50062 D21 | M-020429- Rh family, I | 57127 RHBG      | 2107 | 4.2715 | 6.0465 |
| 50062 D23 | M-015656- LYR motif c  | 57128 LYRM4     | 2767 | 6.8305 | 3.4875 |
| 50062 E02 | M-015878- translocase  | 56993 TOMM22    | 3828 | 7.8631 | 2.4549 |
| 50062 E04 | M-020728- chromoson    | 56988 C8orf17   | 1346 | 7.9495 | 2.3685 |
| 50062 E05 | M-010717- thioredoxir  | 56255 TXNDC13   | 2135 | 12.459 | 2.141  |
| 50062 E06 | M-015289- bobby sox l  | 56987 BBX       | 2270 | 18.722 | 8.404  |
| 50062 E07 | M-015425- SERTA dom    | 56256 SERTAD4   | 2887 | 11.223 | 0.905  |
| 50062 E08 | M-018957- DTW doma     | 56986 DTWD1     | 1545 | 8.5437 | 1.7743 |
| 50062 E09 | M-016636- bin3, bicoic | 56257 BCDIN3    | 1458 | 10.151 | 0.167  |
| 50062 E10 | M-015485- chromoson    | 56985 C17orf48  | 2784 | 12.787 | 2.469  |
| 50062 E11 | M-021056- chromoson    | 56260 C8orf44   | 2696 | 13.205 | 2.887  |
| 50062 E12 | M-016678- tumor necr   | 56984 TNFSF5IP1 | 1932 | 9.265  | 1.053  |
| 50062 E13 | M-013836- hypothetic   | 56261 RP5-1022P | 1916 | 12.787 | 2.469  |
| 50062 E14 | M-016137- KTEL (Lys-T  | 56983 KTELC1    | 1506 | 10.425 | 0.107  |
| 50062 E15 | M-026211- leucine ric  | 56262 LRRC8A    | 698  | 11.748 | 1.43   |

|           |                        |                 |      |        |        |
|-----------|------------------------|-----------------|------|--------|--------|
| 50062 E16 | M-007029- PR domain    | 56980 PRDM10    | 1607 | 10.019 | 0.299  |
| 50062 E17 | M-005829- carboxypep   | 56265 CPXM1     | 2151 | 14.598 | 4.28   |
| 50062 E18 | M-024110- storkhead l  | 56977 STOX2     | 1917 | 10.016 | 0.302  |
| 50062 E19 | M-015493- cysteine co  | 56267 CCBL2     | 991  | 10.696 | 0.378  |
| 50062 E20 | M-013791- family with  | 56975 FAM20C    | 2096 | 8.2538 | 2.0642 |
| 50062 E21 | M-021048- immunity-r   | 56269 IRGC      | 2298 | 9.5735 | 0.7445 |
| 50062 E23 | M-017119- WDR45-like   | 56270 WDR45L    | 3377 | 10.305 | 0.013  |
| 50062 F02 | M-014011- CASK intera  | 57513 CASKIN2   | 2265 | 16.071 | 5.753  |
| 50062 F04 | M-026468- G protein-c  | 57512 GPR158    | 2112 | 11.6   | 1.282  |
| 50062 F05 | M-013186- mitochond    | 57129 MRPL47    | 2378 | 13.541 | 3.223  |
| 50062 F06 | M-014004- componen     | 57511 COG6      | 2680 | 9.2164 | 1.1016 |
| 50062 F07 | M-004698- chromatin    | 57132 CHMP1B    | 1810 | 13.867 | 3.549  |
| 50062 F08 | M-014000- exportin 5   | 57510 XPO5      | 1697 | 9.5463 | 0.7717 |
| 50062 F09 | M-020422- mannosida    | 57134 MAN1C1    | 2092 | 12.141 | 1.823  |
| 50062 F10 | M-006848- mitochond    | 57509 MTUS1     | 1754 | 15.165 | 4.847  |
| 50062 F11 | M-013846- deleted in : | 57135 DAZ4      | 2265 | 8.2561 | 2.0619 |
| 50062 F12 | M-013999- integrator ( | 57508 INTS2     | 1600 | 7.25   | 3.068  |
| 50062 F13 | M-013867- chromoson    | 57136 C20orf3   | 1418 | 14.386 | 4.068  |
| 50062 F14 | M-024395- zinc finger  | 57507 ZNF608    | 2161 | 7.6816 | 2.6364 |
| 50062 F15 | M-031226- ral guanine  | 57139 RGL3      | 2441 | 12.372 | 2.054  |
| 50062 F16 | M-024237- virus-induc  | 57506 VISA      | 1646 | 11.543 | 1.225  |
| 50062 F17 | M-006032- arginyl ami  | 57140 RNPEPL1   | 2991 | 10.598 | 0.28   |
| 50062 F18 | M-022665- metastasis   | 57504 MTA3      | 4890 | 10.429 | 0.111  |
| 50062 F19 | M-010721- reticulon 4  | 57142 RTN4      | 4644 | 16.947 | 6.629  |
| 50062 F20 | M-010288- neuroligin 4 | 57502 NLGN4X    | 3741 | 8.2866 | 2.0314 |
| 50062 F21 | M-018724- transmembr   | 57146 TMEM159   | 4547 | 8.9729 | 1.3451 |
| 50062 F23 | M-013847- KIAA1219     | 57148 KIAA1219  | 4592 | 21.341 | 11.023 |
| 50062 G02 | M-013798- carcinoeml   | 56971 CEACAM19  | 3234 | 8.9981 | 1.3199 |
| 50062 G04 | M-023237- ataxin 7-lik | 56970 ATXN7L3   | 2555 | 5.8317 | 4.4863 |
| 50062 G05 | M-024780- brain expre  | 56271 BEXL1     | 3065 | 9.2333 | 1.0847 |
| 50062 G06 | M-020638- ribosomal p  | 56969 RPL23AP13 | 2074 | 7.3288 | 2.9892 |
| 50062 G07 | M-019077- gastrokeine  | 56287 GKN1      | 1690 | 5.0888 | 5.2292 |
| 50062 G08 | M-020626- chromoson    | 56967 C14orf132 | 3208 | 17.425 | 7.107  |
| 50062 G09 | M-007611- solute carri | 56301 SLC7A10   | 1946 | 9.815  | 0.503  |
| 50062 G10 | M-013797- poly (ADP-r  | 56965 PARP6     | 1207 | 11.682 | 1.364  |
| 50062 G11 | M-005170- methyltran   | 56339 METTL3    | 1257 | 7.2395 | 3.0785 |
| 50062 G12 | M-022323- hypothetic   | 56964 LOC56964  | 2010 | 7.3632 | 2.9548 |
| 50062 G13 | M-009763- protein arg  | 56341 PRMT8     | 2214 | 11.698 | 1.38   |
| 50062 G14 | M-013796- RGM doma     | 56963 RGMA      | 2514 | 5.5688 | 4.7492 |
| 50062 G15 | M-013236- calcium bir  | 56344 CABP5     | 2691 | 7.9153 | 2.4027 |
| 50062 G16 | M-023905- Src homolc   | 56961 SHD       | 1760 | 3.2955 | 7.0225 |
| 50062 G17 | M-013237- eukaryotic   | 56478 EIF4ENIF1 | 3575 | 8.1399 | 2.1781 |
| 50062 G18 | M-026172- chromoson    | 56959 C9orf102  | 3300 | 10.909 | 0.591  |
| 50062 G19 | M-013973- DnaJ (Hsp4   | 56521 DNAJC12   | 2438 | 8.3675 | 1.9505 |
| 50062 G20 | M-008670- OTU domai    | 56957 OTUD7B    | 2192 | 9.0785 | 1.2395 |
| 50062 G21 | M-008443- carbohydra   | 56548 CHST7     | 2845 | 6.6081 | 3.7099 |
| 50062 G23 | M-009219- cytochrom    | 56603 CYP26B1   | 4122 | 8.5153 | 1.8027 |

|           |                        |                 |      |        |        |
|-----------|------------------------|-----------------|------|--------|--------|
| 50062 H02 | M-028159- KIAA1257     | 57501 KIAA1257  | 2396 | 14.19  | 3.872  |
| 50062 H04 | M-022984- kinase D-in  | 57498 KIDINS220 | 2068 | 7.3017 | 3.0163 |
| 50062 H05 | M-015432- LYR motif c  | 57149 LYRM1     | 2383 | 13.512 | 3.194  |
| 50062 H06 | M-025093- leucine rich | 57497 LRFN2     | 2919 | 6.9202 | 3.3978 |
| 50062 H07 | M-018820- chromosom    | 57150 C6orf162  | 1703 | 8.0446 | 2.2734 |
| 50062 H08 | M-023887- KIAA1239     | 57495 KIAA1239  | 1350 | 11.852 | 1.534  |
| 50062 H09 | M-020384- lysozyme-li  | 57151 LYZL6     | 2077 | 15.166 | 4.848  |
| 50062 H10 | M-027036- family with  | 57494 FAM80B    | 2141 | 12.891 | 2.573  |
| 50062 H11 | M-013188- secreted LY  | 57152 SLURP1    | 1382 | 12.084 | 1.766  |
| 50062 H12 | M-023585- HEG homol    | 57493 HEG1      | 1668 | 9.5324 | 0.7856 |
| 50062 H13 | M-018034- solute carri | 57153 SLC44A2   | 1572 | 11.641 | 1.323  |
| 50062 H14 | M-013970- AT rich inte | 57492 ARID1B    | 1816 | 13.767 | 3.449  |
| 50062 H15 | M-021981- transmemk    | 57156 TMEM63C   | 1693 | 8.3875 | 1.9305 |
| 50062 H16 | M-021619- outer dens   | 57489 ODF2L     | 1906 | 11.385 | 1.067  |
| 50062 H17 | M-013189- junctophilii | 57158 JPH2      | 930  | 12.258 | 1.94   |
| 50062 H18 | M-025231- family with  | 57488 FAM62B    | 1959 | 7.9632 | 2.3548 |
| 50062 H19 | M-007032- tripartite r | 57159 TRIM54    | 2134 | 3.8425 | 6.4755 |
| 50062 H20 | M-025438- ataxin 7-lik | 57485 ATXN7L1   | 2292 | 12.391 | 2.073  |
| 50062 H21 | M-013839- pellino hon  | 57161 PELI2     | 1930 | 5.544  | 4.774  |
| 50062 H23 | M-013814- pellino hon  | 57162 PELI1     | 1786 | 3.5274 | 6.7906 |
| 50062 I02 | M-031943- LIM homec    | 56956 LHX9      | 2019 | 5.9435 | 4.3745 |
| 50062 I04 | M-020547- matrix, ext  | 56955 MEPE      | 3189 | 6.8046 | 3.5134 |
| 50062 I05 | M-018108- ERO1-like k  | 56605 ERO1LB    | 2393 | 5.14   | 5.178  |
| 50062 I06 | M-013214- 5',3'-nuclec | 56953 NT5M      | 2294 | 15.039 | 4.721  |
| 50062 I07 | M-012869- small EDRK   | 56617 SERF1B    | 1212 | 8.0033 | 2.3147 |
| 50062 I08 | M-015695- phosphorit   | 56952 PRTFDC1   | 2788 | 11.442 | 1.124  |
| 50062 I09 | M-005229- N-acylsphir  | 56624 ASAH2     | 2578 | 12.878 | 2.56   |
| 50062 I10 | M-020220- chromosom    | 56951 C5orf15   | 1592 | 8.794  | 1.524  |
| 50062 I11 | M-019191- eukaryotic   | 56648 EIF5A2    | 2189 | 9.9589 | 0.3591 |
| 50062 I12 | M-004914- XPA bindin   | 56949 XAB2      | 815  | 10.92  | 0.602  |
| 50062 I13 | M-005243- transmemk    | 56649 TMPRSS4   | 2016 | 16.171 | 5.853  |
| 50062 I14 | M-020322- chromosom    | 56948 C14orf124 | 1757 | 5.1793 | 5.1387 |
| 50062 I15 | M-020682- claudin dor  | 56650 CLDND1    | 1658 | 11.46  | 1.142  |
| 50062 I16 | M-018261- chromosom    | 56947 C2orf33   | 1804 | 9.7561 | 0.5619 |
| 50062 I17 | M-014717- chromosom    | 56651 C18orf2   | 2113 | 9.2286 | 1.0894 |
| 50062 I18 | M-004081- chromosom    | 56946 C11orf30  | 1289 | 7.758  | 2.56   |
| 50062 I19 | M-009954- neural prol  | 56654 NPDC1     | 2237 | 12.427 | 2.109  |
| 50062 I20 | M-013219- mitochond    | 56945 MRPS22    | 3643 | 10.211 | 0.107  |
| 50062 I21 | M-009850- polymerase   | 56655 POLE4     | 2030 | 9.3596 | 0.9584 |
| 50062 I23 | M-007028- tripartite r | 56658 TRIM39    | 2541 | 12.554 | 2.236  |
| 50062 J02 | M-010713- ring finger  | 57484 RNF150    | 2912 | 9.1346 | 1.1834 |
| 50062 J04 | M-024133- KIAA1211 p   | 57482 KIAA1211  | 3175 | 8.5039 | 1.8141 |
| 50062 J05 | M-017864- aspartate k  | 57168 ASPHD2    | 2410 | 14.274 | 3.956  |
| 50062 J06 | M-025003- KIAA1210 p   | 57481 RP13-347D | 1289 | 12.49  | 2.172  |
| 50062 J07 | M-014074- zinc finger, | 57169 ZNF1      | 1868 | 9.2612 | 1.0568 |
| 50062 J08 | M-024745- pleckstrin k | 57480 PLEKHG1   | 1968 | 8.8415 | 1.4765 |
| 50062 J09 | M-010493- coronin, ac  | 57175 CORO1B    | 1632 | 10.233 | 0.085  |

|           |                        |                 |      |        |        |
|-----------|------------------------|-----------------|------|--------|--------|
| 50062 J10 | M-023777- proline rich | 57479 PRR12     | 3118 | 8.7556 | 1.5624 |
| 50062 J11 | M-008268- valyl-tRNA   | 57176 VARS2     | 1509 | 11.597 | 1.279  |
| 50062 J12 | M-024692- shroom far   | 57477 SHROOM4   | 1493 | 11.253 | 0.935  |
| 50062 J13 | M-007034- zinc finger, | 57178 ZMIZ1     | 1897 | 10.596 | 0.278  |
| 50062 J14 | M-026529- GRAM dom     | 57476 GRAMD1B   | 2575 | 11.223 | 0.905  |
| 50062 J15 | M-015433- KIAA1191     | 57179 KIAA1191  | 2398 | 16.972 | 6.654  |
| 50062 J16 | M-030302- pleckstrin l | 57475 PLEKHH1   | 1745 | 7.2206 | 3.0974 |
| 50062 J17 | M-007565- solute carri | 57181 SLC39A10  | 2610 | 8.5824 | 1.7356 |
| 50062 J18 | M-013937- zinc finger  | 57474 ZNF490    | 2748 | 12.154 | 1.836  |
| 50062 J19 | M-028250- ankyrin rep  | 57182 ANKRD50   | 3067 | 6.5536 | 3.7644 |
| 50062 J20 | M-013934- zinc finger  | 57473 ZNF512B   | 3154 | 12.143 | 1.825  |
| 50062 J21 | M-013849- chromoson    | 57184 C15orf17  | 3394 | 12.817 | 2.499  |
| 50062 J23 | M-020359- NIPA-like d  | 57185 NPAL3     | 3150 | 8.5714 | 1.7466 |
| 50062 K02 | M-020325- olfactomec   | 56944 OLFML3    | 2918 | 22.378 | 12.06  |
| 50062 K04 | M-018808- enhancer o   | 56943 ENY2      | 3365 | 23.655 | 13.337 |
| 50062 K05 | M-006256- potassium    | 56660 KCNK12    | 2669 | 20.382 | 10.064 |
| 50062 K06 | M-020333- chromoson    | 56941 C3orf37   | 2494 | 20.249 | 9.931  |
| 50062 K07 | M-015135- pannexin 2   | 56666 PANX2     | 1627 | 15.12  | 4.802  |
| 50062 K08 | M-010501- transmemk    | 56937 TMEPAI    | 1351 | 18.653 | 8.335  |
| 50062 K09 | M-015057- mucin 13, c  | 56667 MUC13     | 1763 | 21.044 | 10.726 |
| 50062 K10 | M-020411- chromoson    | 56936 C14orf162 | 1628 | 22.789 | 12.471 |
| 50062 K11 | M-015631- chromoson    | 56672 C11orf17  | 1999 | 26.413 | 16.095 |
| 50062 K12 | M-020414- chromoson    | 56935 C11orf75  | 2142 | 30.719 | 20.401 |
| 50062 K13 | M-020701- chromoson    | 56673 C11orf16  | 1052 | 32.414 | 22.096 |
| 50062 K14 | M-008550- carbonic ar  | 56934 CA10      | 1712 | 32.535 | 22.217 |
| 50062 K15 | M-020706- TMEM9 do     | 56674 TMEM9B    | 1050 | 31.619 | 21.301 |
| 50062 K16 | M-031942- dihydrouric  | 56931 DUS3L     | 2000 | 25.35  | 15.032 |
| 50062 K17 | M-013871- nuclear rec  | 56675 NRIP3     | 3534 | 18.308 | 7.99   |
| 50062 K18 | M-019130- fem-1 hom    | 56929 FEM1C     | 963  | 18.588 | 8.27   |
| 50062 K19 | M-008980- achaete-sci  | 56676 ASCL3     | 1474 | 30.258 | 19.94  |
| 50062 K20 | M-006041- signal pept  | 56928 SPPL2B    | 2285 | 23.807 | 13.489 |
| 50062 K21 | M-016756- SAR1 gene    | 56681 SAR1A     | 2886 | 19.889 | 9.571  |
| 50062 K23 | M-013838- chromoson    | 56683 C21orf59  | 2954 | 16.994 | 6.676  |
| 50062 L02 | M-019101- CCR4-NOT     | 57472 CNOT6     | 4165 | 16.086 | 5.768  |
| 50062 L04 | M-027986- KIAA1189     | 57471 KIAA1189  | 3585 | 13.947 | 3.629  |
| 50062 L05 | M-024244- chromoson    | 57186 C20orf74  | 3949 | 24.183 | 13.865 |
| 50062 L06 | M-010724- leucine rich | 57470 LRRC47    | 4256 | 10.949 | 0.631  |
| 50062 L07 | M-025006- THO compl    | 57187 THOC2     | 2765 | 15.841 | 5.523  |
| 50062 L08 | M-031129- KIAA1183 p   | 57469 KIAA1183  | 1801 | 13.604 | 3.286  |
| 50062 L09 | M-015893- ATPase, Cla  | 57194 ATP10A    | 4508 | 18.722 | 8.404  |
| 50062 L10 | M-007386- solute carri | 57468 SLC12A5   | 4258 | 18.483 | 8.165  |
| 50062 L11 | M-018004- ATPase, Cla  | 57205 ATP10D    | 3412 | 15.709 | 5.391  |
| 50062 L12 | M-015488- hedgehog c   | 57467 HHATL     | 4240 | 20.094 | 9.776  |
| 50062 L13 | M-014069- zinc finger  | 57209 ZNF248    | 4450 | 18.697 | 8.379  |
| 50062 L14 | M-032088- splicing fac | 57466 SFRS15    | 4657 | 19.54  | 9.222  |
| 50062 L15 | M-025844- solute carri | 57210 SLC45A4   | 2866 | 18.842 | 8.524  |
| 50062 L16 | M-022880- TBC1 doma    | 57465 TBC1D24   | 2143 | 23.565 | 13.247 |



|           |                        |                 |      |        |        |
|-----------|------------------------|-----------------|------|--------|--------|
| 50062 L17 | M-027524- KIAA0495     | 57212 KIAA0495  | 4112 | 16.732 | 6.414  |
| 50062 L18 | M-025451- family with  | 57464 FAM40B    | 3964 | 23.36  | 13.042 |
| 50062 L19 | M-013852- chromosom    | 57213 C13orf1   | 5885 | 10.501 | 0.183  |
| 50062 L20 | M-021515- adhesion r   | 57463 AMIGO1    | 5075 | 11.488 | 1.17   |
| 50062 L21 | M-022291- KIAA1199     | 57214 KIAA1199  | 4247 | 19.543 | 9.225  |
| 50062 L23 | M-021450- THAP doma    | 57215 THAP11    | 2949 | 10.885 | 0.567  |
| 50062 M02 | M-005530- G protein-c  | 56927 GPR108    | 2460 | 5.1626 | 5.1554 |
| 50062 M04 | M-010718- nicalin horr | 56926 NCLN      | 2658 | 16.14  | 5.822  |
| 50062 M05 | M-013173- junctophilin | 56704 JPH1      | 2722 | 14.475 | 4.157  |
| 50062 M06 | M-015587- latexin      | 56925 LXN       | 2106 | 10.114 | 0.204  |
| 50062 M07 | M-013208- resistin     | 56729 RETN      | 3344 | 15.102 | 4.784  |
| 50062 M08 | M-020454- sema doma    | 56920 SEMA3G    | 2254 | 13.398 | 3.08   |
| 50062 M09 | M-018927- SLC2A4 reg   | 56731 SLC2A4RG  | 2203 | 6.128  | 4.19   |
| 50062 M10 | M-017205- DEAH (Asp-   | 56919 DHX33     | 2910 | 8.0069 | 2.3111 |
| 50062 M11 | M-017899- BarH-like 1  | 56751 BARHL1    | 2748 | 7.0961 | 3.2219 |
| 50062 M12 | M-007323- hypothetic   | 56918 DKFZp547f | 2315 | 5.9179 | 4.4001 |
| 50062 M13 | M-022134- formin 2     | 56776 FMN2      | 2172 | 12.983 | 2.665  |
| 50062 M14 | M-023769- Meis home    | 56917 MEIS3     | 1599 | 3.8149 | 6.5031 |
| 50062 M15 | M-017449- zinc finger  | 56829 ZC3HAV1   | 2321 | 16.415 | 6.097  |
| 50062 M16 | M-020482- exosome c    | 56915 EXOSC5    | 2048 | 17.773 | 7.455  |
| 50062 M17 | M-013217- interferon,  | 56832 IFNK      | 2318 | 6.6005 | 3.7175 |
| 50062 M18 | M-020490- core 1 synt  | 56913 C1GALT1   | 3061 | 8.2326 | 2.0854 |
| 50062 M19 | M-013218- SLAM famil   | 56833 SLAMF8    | 3143 | 11.295 | 0.977  |
| 50062 M20 | M-015611- chromosom    | 56912 C11orf60  | 3229 | 9.9412 | 0.3768 |
| 50062 M21 | M-016241- transcriptic | 56849 TCEAL7    | 2586 | 10.17  | 0.148  |
| 50062 M23 | M-021215- chromosom    | 56851 C15orf24  | 2234 | 5.9087 | 4.4093 |
| 50062 N02 | M-026129- KIAA1161     | 57462 KIAA1161  | 2565 | 10.799 | 0.481  |
| 50062 N04 | M-013894- ISY1 splicin | 57461 ISY1      | 1574 | 4.1931 | 6.1249 |
| 50062 N05 | M-010581- vang-like 2  | 57216 VANGL2    | 3445 | 15.53  | 5.212  |
| 50062 N06 | M-013877- transmemk    | 57458 TMCC3     | 3258 | 7.9804 | 2.3376 |
| 50062 N07 | M-027882- tetratricop  | 57217 TTC7A     | 2487 | 12.224 | 1.906  |
| 50062 N08 | M-013876- KIAA1143     | 57456 KIAA1143  | 1886 | 10.127 | 0.191  |
| 50062 N09 | M-013854- KIAA1244     | 57221 KIAA1244  | 2905 | 14.699 | 4.381  |
| 50062 N10 | M-021445- REX1, RNA    | 57455 REXO1     | 2831 | 4.2388 | 6.0792 |
| 50062 N11 | M-027284- SMEK hom     | 57223 SMEK2     | 2658 | 4.3642 | 5.9538 |
| 50062 N12 | M-007884- Down synd    | 57453 DSCAML1   | 2085 | 11.511 | 1.193  |
| 50062 N13 | M-015717- LYR motif c  | 57226 LYRM2     | 1515 | 9.901  | 0.417  |
| 50062 N14 | M-021972- UDP-N-ace    | 57452 GALNTL1   | 2439 | 13.612 | 3.294  |
| 50062 N15 | M-013190- sorting nex  | 57231 SNX14     | 1551 | 6.7054 | 3.6126 |
| 50062 N16 | M-024304- odz, odd O   | 57451 ODZ2      | 2155 | 5.9397 | 4.3783 |
| 50062 N17 | M-024656- zinc finger  | 57232 ZNF630    | 836  | 8.2536 | 2.0644 |
| 50062 N18 | M-013873- pleckstrin h | 57449 PLEKHG5   | 2780 | 3.3094 | 7.0086 |
| 50062 N19 | M-021726- family with  | 57234 FAM91A2   | 1762 | 3.9728 | 6.3452 |
| 50062 N20 | M-013533- NDRG fami    | 57446 NDRG3     | 3624 | 10.017 | 0.301  |
| 50062 N21 | M-027537- KIAA0492 p   | 57238 KIAA0492  | 2110 | 7.6303 | 2.6877 |
| 50062 N23 | M-019335- hypothetic   | 57245 FLJ20209  | 1957 | 4.3945 | 5.9235 |
| 50062 O02 | M-017901- chromosom    | 56911 C21orf7   | 1355 | 5.0923 | 5.2257 |

|           |                          |                |      |        |         |
|-----------|--------------------------|----------------|------|--------|---------|
| 50062 O04 | M-017289- START dom      | 56910 STARD7   | 2533 | 11.291 | 0.973   |
| 50062 O05 | M-013824- bruno-like     | 56853 BRUNOL4  | 2650 | 3.9623 | 6.3557  |
| 50062 O06 | M-023397- spire homc     | 56907 SPIRE1   | 2357 | 6.6186 | 3.6994  |
| 50062 O07 | M-013805- follistatin-li | 56884 FSTL5    | 3297 | 10.252 | 0.066   |
| 50062 O08 | M-021460- THAP doma      | 56906 THAP10   | 2749 | 10.113 | 0.205   |
| 50062 O09 | M-006632- UDP-glucos     | 56886 UGCL1    | 1971 | 6.4434 | 3.8746  |
| 50062 O10 | M-031882- chromoson      | 56905 C15orf39 | 2523 | 4.7166 | 5.6014  |
| 50062 O11 | M-017900- potassium      | 56888 KCMF1    | 2532 | 9.4787 | 0.8393  |
| 50062 O12 | M-015810- SH3-domai      | 56904 SH3GLB2  | 2019 | 5.9931 | 4.3249  |
| 50062 O13 | M-010220- transmemk      | 56889 TM9SF3   | 3204 | 7.5531 | 2.7649  |
| 50062 O14 | M-009500- poly(A) pol    | 56903 PAPOLB   | 1936 | 8.936  | 1.382   |
| 50062 O15 | M-021184- lectin, gala   | 56891 LGALS14  | 1716 | 12.238 | 1.92    |
| 50062 O16 | M-018033- partner of l   | 56902 PNO1     | 3278 | 5.2471 | 5.0709  |
| 50062 O17 | M-015557- chromoson      | 56892 C8orf4   | 2858 | 17.74  | 7.422   |
| 50062 O18 | M-008192- ankyrin rep    | 56899 ANKS1B   | 2500 | 5.28   | 5.038   |
| 50062 O19 | M-021178- ubiquilin 4    | 56893 UBQLN4   | 852  | 7.7465 | 2.5715  |
| 50062 O20 | M-008694- 3-hydroxyt     | 56898 BDH2     | 4463 | 7.7974 | 2.5206  |
| 50062 O21 | M-008581- dihydropyr     | 56896 DPYSL5   | 3813 | 6.5565 | 3.7615  |
| 50062 O23 | M-010072- Werner hel     | 56897 WRNIP1   | 2622 | 5.6445 | 4.6735  |
| 50062 P02 | M-007466- solute carri   | 57419 SLC24A3  | 3080 | 6.3312 | 3.9868  |
| 50062 P04 | M-021451- WD repeat      | 57418 WDR18    | 2309 | 5.8467 | 4.4713  |
| 50062 P05 | M-007580- solute carri   | 57282 SLC4A10  | 2681 | 9.3995 | 0.9185  |
| 50062 P06 | M-017892- chromoson      | 57415 C3orf14  | 1961 | 4.9465 | 5.3715  |
| 50062 P07 | M-024130- KIAA0114       | 57291 KIAA0114 | 3202 | 7.183  | 3.135   |
| 50062 P08 | M-020778- rhomboid c     | 57414 RHBDD2   | 2415 | 4.6791 | 5.6389  |
| 50062 P09 | M-008481- CSRP2 bind     | 57325 CSRP2BP  | 3736 | 3.1317 | 7.1863  |
| 50062 P10 | M-009525- arsenic (+3    | 57412 AS3MT    | 1559 | 7.9538 | 2.3642  |
| 50062 P11 | M-017962- reticulocalt   | 57333 RCN3     | 2628 | 4.2618 | 6.0562  |
| 50062 P12 | M-020761- leucine-rich   | 57408 LRTM1    | 3016 | 7.4271 | 2.8909  |
| 50062 P13 | M-020716- zinc finger    | 57335 ZNF286A  | 3096 | 7.2351 | 3.0829  |
| 50062 P14 | M-020759- NmrA-like f    | 57407 NMRAL1   | 1932 | 4.9689 | 5.3491  |
| 50062 P15 | M-007035- zinc finger    | 57336 ZNF287   | 2820 | 3.2624 | 7.0556  |
| 50062 P16 | M-009929- cytochrom      | 57404 CYP20A1  | 1898 | 3.7935 | 6.5245  |
| 50062 P17 | M-006035- SUMO1/se       | 57337 SENP7    | 2641 | 4.8466 | 5.4714  |
| 50062 P18 | M-015683- transmemk      | 57393 TMEM27   | 2292 | 2.0942 | 8.2238  |
| 50062 P19 | M-020719- zinc finger    | 57343 ZNF304   | 2971 | 4.7122 | 5.6058  |
| 50062 P20 | M-020748- MRS2-like,     | 57380 MRS2L    | 3393 | 5.0693 | 5.2487  |
| 50062 P21 | M-020721- tweety hor     | 57348 TTYH1    | 2215 | 4.1535 | 6.1645  |
| 50062 P23 | M-005439- G protein-c    | 56834 GPR137   | 4437 | 2.0284 | 8.2896  |
|           |                          | MAD            |      | 10.318 | 3.318   |
|           |                          | MAD3           |      |        | 9.954   |
|           |                          | MADc           |      |        | 4.91064 |
| 50062 C22 | Human4 Pc RNAi           | empty          |      |        |         |
| 50062 D22 | Human4 Pc RNAi           | empty          |      |        |         |
| 50062 E22 | Human4 Pc RNAi           | empty          |      |        |         |
| 50062 F22 | Human4 Pc RNAi           | empty          |      |        |         |

|           |                |       |
|-----------|----------------|-------|
| 50062 G22 | Human4 Pc RNAi | empty |
| 50062 H22 | Human4 Pc RNAi | empty |
| 50062 I22 | Human4 Pc RNAi | empty |
| 50062 J22 | Human4 Pc RNAi | empty |

| rZ       | cell ct | % inf  | AD     | rZ       | cell ct | % inf  | AD      | rZ       |
|----------|---------|--------|--------|----------|---------|--------|---------|----------|
| 0.168003 | 1689    | 10.243 | 0.05   | 0.00982  | 2130    | 7.8404 | 0.9067  | -0.22821 |
| 0.64289  | 2313    | 15.045 | 4.852  | 0.952948 | 2037    | 16.74  | 7.9929  | 2.011774 |
| 0.77159  | 1142    | 14.448 | 4.255  | 0.835695 | 946     | 12.156 | 3.4089  | 0.858004 |
| 1.533405 | 1740    | 14.828 | 4.635  | 0.910328 | 1895    | 11.768 | 3.0209  | 0.760346 |
| 1.098635 | 989     | 7.6845 | 2.5085 | -0.49268 | 216     | 18.056 | 9.3089  | 2.343005 |
| 1.145472 | 855     | 9.9415 | 0.2515 | -0.0494  | 1366    | 11.127 | 2.3799  | 0.599009 |
| 2.734063 | 1071    | 18.861 | 8.668  | 1.702422 | 1692    | 20.745 | 11.9979 | 3.019813 |
| 2.483994 | 1298    | 22.342 | 12.149 | 2.386101 | 1862    | 14.071 | 5.3239  | 1.34     |
| 2.645073 | 1822    | 27.387 | 17.194 | 3.376954 | 2532    | 25.118 | 16.3709 | 4.120476 |
| 1.763925 | 1347    | 15.219 | 5.026  | 0.987122 | 1414    | 11.245 | 2.4979  | 0.628709 |
| 0.857118 | 1487    | 14.19  | 3.997  | 0.785023 | 1743    | 17.671 | 8.9239  | 2.246103 |
| 3.200601 | 1027    | 22.006 | 11.813 | 2.32011  | 648     | 10.648 | 1.9009  | 0.478447 |
| 0.680563 | 1786    | 22.004 | 11.811 | 2.319717 | 1353    | 15.891 | 7.1439  | 1.798085 |
| 0.927781 | 996     | 23.193 | 13     | 2.55324  | 1293    | 16.396 | 7.6489  | 1.925191 |
| 0.578947 | 2210    | 17.964 | 7.771  | 1.526248 | 2450    | 12.204 | 3.4569  | 0.870085 |
| 0.737378 | 1596    | 16.416 | 6.223  | 1.222216 | 1424    | 21.067 | 12.3199 | 3.100859 |
| 1.538903 | 863     | 16.454 | 6.261  | 1.22968  | 1043    | 17.162 | 8.4149  | 2.11799  |
| 0.881148 | 1140    | 14.912 | 4.719  | 0.926826 | 945     | 16.085 | 7.3379  | 1.846914 |
| 1.802413 | 2126    | 13.17  | 2.977  | 0.584692 | 1629    | 19.091 | 10.3439 | 2.60351  |
| 1.598366 | 1951    | 14.454 | 4.261  | 0.836873 | 1575    | 17.27  | 8.5229  | 2.145173 |
| 0.07555  | 1817    | 14.915 | 4.722  | 0.927415 | 2803    | 9.7396 | 0.9925  | 0.249807 |
| 0.156191 | 2256    | 14.805 | 4.612  | 0.905811 | 3733    | 10.822 | 2.0749  | 0.522242 |
| 0.939592 | 1477    | 17.197 | 7.004  | 1.375607 | 2006    | 12.463 | 3.7159  | 0.935274 |
| 1.078882 | 3245    | 12.573 | 2.38   | 0.467439 | 2834    | 9.0332 | 0.2861  | 0.07201  |
| 0.823722 | 2760    | 9.3116 | 0.8814 | -0.17311 | 3624    | 9.7406 | 0.9935  | 0.250059 |
| 1.168076 | 1331    | 9.9174 | 0.2756 | -0.05413 | 1536    | 10.417 | 1.6699  | 0.420306 |
| 1.057296 | 2782    | 13.983 | 3.79   | 0.744368 | 3251    | 7.167  | 1.5801  | -0.3977  |
| 1.048539 | 5125    | 18.341 | 8.148  | 1.600292 | 5035    | 12.612 | 3.8649  | 0.972777 |
| 1.198214 | 1601    | 12.992 | 2.799  | 0.549732 | 1220    | 10.902 | 2.1549  | 0.542378 |
| 1.009644 | 2910    | 22.302 | 12.109 | 2.378245 | 2605    | 16.238 | 7.4909  | 1.885423 |
| 0.466334 | 2022    | 9.8912 | 0.3018 | -0.05927 | 2146    | 10.158 | 1.4109  | 0.355117 |
| 0.536794 | 3463    | 11.031 | 0.838  | 0.164586 | 3541    | 5.5916 | 3.1555  | -0.79422 |
| 2.247976 | 2130    | 16.385 | 6.192  | 1.216128 | 2985    | 14.137 | 5.3899  | 1.356612 |
| 1.791416 | 2669    | 15.062 | 4.869  | 0.956287 | 2514    | 10.7   | 1.9529  | 0.491535 |
| 2.708201 | 3184    | 19.881 | 9.688  | 1.902753 | 2848    | 10.288 | 1.5409  | 0.387837 |
| 1.429956 | 2709    | 6.866  | 3.327  | -0.65343 | 3256    | 6.6646 | 2.0825  | -0.52416 |
| 1.185996 | 2867    | 11.789 | 1.596  | 0.313459 | 2513    | 8.3963 | 0.3508  | -0.08829 |
| 0.205269 | 4165    | 13.902 | 3.709  | 0.728459 | 4441    | 8.2639 | 0.4832  | -0.12162 |
| 1.475571 | 4282    | 14.409 | 4.216  | 0.828035 | 3401    | 9.703  | 0.9559  | 0.240595 |
| 0.322565 | 2829    | 8.024  | 2.169  | -0.426   | 1770    | 7.2881 | 1.459   | -0.36722 |
| -0.21669 | 1222    | 12.357 | 2.164  | 0.425016 | 1414    | 5.0919 | 3.6552  | -0.92    |
| -0.56864 | 1704    | 7.6878 | 2.5052 | -0.49203 | 1638    | 5.7998 | 2.9473  | -0.74182 |
| 0.002647 | 2443    | 8.3504 | 1.8426 | -0.36189 | 2341    | 9.4831 | 0.736   | 0.185248 |
| -0.52637 | 4984    | 8.9085 | 1.2845 | -0.25228 | 2087    | 6.229  | 2.5181  | -0.63379 |
| -0.76239 | 2073    | 7.2359 | 2.9571 | -0.58078 | 2177    | 5.9256 | 2.8215  | -0.71016 |
| -0.54936 | 1930    | 10.984 | 0.791  | 0.155355 | 1301    | 7.2252 | 1.5219  | -0.38305 |

|          |      |        |        |          |      |        |        |          |
|----------|------|--------|--------|----------|------|--------|--------|----------|
| -0.69779 | 1740 | 7.4713 | 2.7217 | -0.53455 | 2044 | 7.8278 | 0.9193 | -0.23138 |
| -0.98592 | 2602 | 7.6095 | 2.5835 | -0.50741 | 1752 | 6.6781 | 2.069  | -0.52076 |
| -0.62452 | 1529 | 9.7449 | 0.4481 | -0.08801 | 1263 | 7.2842 | 1.4629 | -0.3682  |
| -0.57386 | 1533 | 7.5669 | 2.6261 | -0.51577 | 1476 | 7.9268 | 0.8203 | -0.20647 |
| -0.36545 | 893  | 8.8466 | 1.3464 | -0.26444 | 758  | 9.6306 | 0.8835 | 0.222373 |
| -1.10831 | 1455 | 5.7045 | 4.4885 | -0.88156 | 1594 | 6.5245 | 2.2226 | -0.55942 |
| -0.48375 | 1879 | 5.801  | 4.392  | -0.8626  | 909  | 7.3707 | 1.3764 | -0.34643 |
| -0.7041  | 1666 | 8.5834 | 1.6096 | -0.31613 | 1742 | 9.1274 | 0.3803 | 0.09572  |
| -1.41085 | 1675 | 5.3731 | 4.8199 | -0.94664 | 1414 | 4.7383 | 4.0088 | -1.009   |
| 1.203509 | 3581 | 16.308 | 6.115  | 1.201005 | 2294 | 9.9826 | 1.2355 | 0.310969 |
| -0.44878 | 1499 | 9.2061 | 0.9869 | -0.19383 | 875  | 10.857 | 2.1099 | 0.531052 |
| -0.44188 | 3201 | 12.777 | 2.584  | 0.507506 | 1653 | 9.6794 | 0.9323 | 0.234655 |
| 0.127275 | 2846 | 9.7681 | 0.4249 | -0.08345 | 3053 | 7.3698 | 1.3773 | -0.34666 |
| 0.054779 | 2115 | 11.631 | 1.438  | 0.282428 | 1956 | 9.2025 | 0.4554 | 0.114622 |
| 0.505026 | 2274 | 11.478 | 1.285  | 0.252378 | 2167 | 11.767 | 3.0199 | 0.760094 |
| -0.33126 | 2571 | 7.9347 | 2.2583 | -0.44354 | 3571 | 7.1689 | 1.5782 | -0.39723 |
| -0.33036 | 1723 | 7.8932 | 2.2998 | -0.45169 | 1573 | 8.1373 | 0.6098 | -0.15348 |
| -0.92078 | 2320 | 9.2241 | 0.9689 | -0.19029 | 1466 | 5.116  | 3.6311 | -0.91393 |
| -0.76063 | 1425 | 4      | 6.193  | -1.21632 | 1895 | 7.3351 | 1.412  | -0.35539 |
| -1.26057 | 1624 | 5.4187 | 4.7743 | -0.93769 | 1558 | 4.4288 | 4.3183 | -1.0869  |
| -0.0951  | 1602 | 7.8652 | 2.3278 | -0.45719 | 2001 | 4.8476 | 3.8995 | -0.98149 |
| -0.97061 | 793  | 12.736 | 2.543  | 0.499453 | 711  | 6.6104 | 2.1367 | -0.5378  |
| -0.61917 | 2388 | 8.2915 | 1.9015 | -0.37346 | 2232 | 6.1828 | 2.5643 | -0.64542 |
| -0.91269 | 1822 | 7.5741 | 2.6189 | -0.51436 | 2092 | 5.7839 | 2.9632 | -0.74582 |
| -0.90571 | 1176 | 5.7823 | 4.4107 | -0.86628 | 1489 | 6.313  | 2.4341 | -0.61265 |
| -0.23419 | 1188 | 9.2593 | 0.9337 | -0.18338 | 1904 | 6.3025 | 2.4446 | -0.61529 |
| -0.70364 | 1529 | 9.3525 | 0.8405 | -0.16508 | 1101 | 7.9019 | 0.8452 | -0.21273 |
| -0.54924 | 1093 | 4.849  | 5.344  | -1.04958 | 1664 | 3.9062 | 4.8409 | -1.21843 |
| -0.01487 | 1193 | 9.8072 | 0.3858 | -0.07577 | 1563 | 7.1657 | 1.5814 | -0.39803 |
| -0.83065 | 1724 | 7.1346 | 3.0584 | -0.60068 | 1709 | 5.3833 | 3.3638 | -0.84665 |
| 0.344354 | 2199 | 11.187 | 0.994  | 0.195225 | 3368 | 8.9074 | 0.1603 | 0.040347 |
| 0.343743 | 3171 | 13.34  | 3.147  | 0.61808  | 3090 | 9.1909 | 0.4438 | 0.111702 |
| -1.23131 | 1121 | 9.3666 | 0.8264 | -0.16231 | 1508 | 8.3554 | 0.3917 | -0.09859 |
| -0.71019 | 1988 | 5.3823 | 4.8107 | -0.94484 | 2524 | 5.0713 | 3.6758 | -0.92518 |
| -0.49991 | 1347 | 8.7602 | 1.4328 | -0.28141 | 3790 | 9.1029 | 0.3558 | 0.089553 |
| -0.48232 | 908  | 8.0396 | 2.1534 | -0.42293 | 1487 | 6.187  | 2.5601 | -0.64436 |
| 0.435992 | 963  | 15.369 | 5.176  | 1.016582 | 2133 | 10.314 | 1.5669 | 0.394381 |
| 1.711386 | 1618 | 20.828 | 10.635 | 2.088747 | 2558 | 18.296 | 9.5489 | 2.403412 |
| 0.184294 | 1874 | 12.593 | 2.4    | 0.471367 | 2957 | 10.754 | 2.0069 | 0.505127 |
| -0.36132 | 1301 | 7.5327 | 2.6603 | -0.52249 | 2193 | 10.078 | 1.3309 | 0.334981 |
| -0.03401 | 700  | 13.143 | 2.95   | 0.579389 | 1526 | 12.713 | 3.9659 | 0.998198 |
| 0.502786 | 1705 | 10.616 | 0.423  | 0.083079 | 2934 | 13.463 | 4.7159 | 1.186969 |
| 0.587907 | 1464 | 16.94  | 6.747  | 1.325132 | 3489 | 14.044 | 5.2969 | 1.333204 |
| -0.21443 | 987  | 11.854 | 1.661  | 0.326226 | 2664 | 6.2688 | 2.4783 | -0.62378 |
| 0.502786 | 1312 | 6.4024 | 3.7906 | -0.74449 | 2148 | 5.4004 | 3.3467 | -0.84235 |
| 0.021789 | 1533 | 8.0235 | 2.1695 | -0.4261  | 2416 | 6.2086 | 2.5385 | -0.63893 |
| 0.291204 | 544  | 20.772 | 10.579 | 2.077748 | 1108 | 13.899 | 5.1519 | 1.296708 |

|          |      |        |        |          |      |        |        |          |
|----------|------|--------|--------|----------|------|--------|--------|----------|
| -0.06089 | 682  | 12.317 | 2.124  | 0.41716  | 1114 | 11.041 | 2.2939 | 0.577364 |
| 0.871577 | 1792 | 23.717 | 13.524 | 2.656155 | 2778 | 15.299 | 6.5519 | 1.649082 |
| -0.0615  | 1591 | 15.211 | 5.018  | 0.985551 | 4342 | 10.871 | 2.1239 | 0.534575 |
| 0.076976 | 1267 | 22.81  | 12.617 | 2.478018 | 1958 | 13.534 | 4.7869 | 1.20484  |
| -0.42035 | 1707 | 8.0844 | 2.1086 | -0.41414 | 2803 | 4.7449 | 4.0022 | -1.00733 |
| -0.15161 | 3548 | 11.415 | 1.222  | 0.240005 | 3013 | 5.1444 | 3.6027 | -0.90678 |
| -0.00265 | 2385 | 8.7631 | 1.4299 | -0.28084 | 2154 | 9.5172 | 0.7701 | 0.19383  |
| 1.171538 | 2007 | 9.5167 | 0.6763 | -0.13283 | 3053 | 5.7976 | 2.9495 | -0.74237 |
| 0.261066 | 1604 | 8.4165 | 1.7765 | -0.34891 | 2655 | 3.0132 | 5.7339 | -1.44319 |
| 0.65633  | 1754 | 10.718 | 0.525  | 0.103112 | 2736 | 6.6886 | 2.0585 | -0.51811 |
| -0.22433 | 2821 | 7.7278 | 2.4652 | -0.48417 | 4236 | 5.4769 | 3.2702 | -0.82309 |
| 0.722716 | 2163 | 15.996 | 5.803  | 1.139727 | 2738 | 8.7655 | 0.0184 | 0.004631 |
| -0.15715 | 1874 | 6.5635 | 3.6295 | -0.71284 | 3238 | 2.7486 | 5.9985 | -1.50979 |
| 0.371235 | 1515 | 9.4389 | 0.7541 | -0.14811 | 2079 | 4.0404 | 4.7067 | -1.18465 |
| 0.98704  | 1159 | 11.821 | 1.628  | 0.319744 | 2056 | 4.8638 | 3.8833 | -0.97741 |
| -0.41988 | 2597 | 11.359 | 1.166  | 0.229006 | 2312 | 4.8875 | 3.8596 | -0.97144 |
| -0.62477 | 1537 | 8.8484 | 1.3446 | -0.26408 | 1693 | 4.7253 | 4.0218 | -1.01227 |
| 0.828405 | 1060 | 6.9811 | 3.2119 | -0.63083 | 1042 | 5.7582 | 2.9889 | -0.75229 |
| -0.53688 | 1603 | 6.1135 | 4.0795 | -0.80123 | 1979 | 2.8297 | 5.9174 | -1.48938 |
| 0.418275 | 1391 | 14.019 | 3.826  | 0.751438 | 1995 | 7.2682 | 1.4789 | -0.37223 |
| 0.249458 | 1203 | 14.63  | 4.437  | 0.87144  | 1653 | 5.6261 | 3.121  | -0.78554 |
| 0.057019 | 1439 | 7.7832 | 2.4098 | -0.47329 | 2530 | 4.2292 | 4.5179 | -1.13713 |
| 0.022604 | 2642 | 10.371 | 0.178  | 0.03496  | 3483 | 6.8332 | 1.9139 | -0.48172 |
| 1.349926 | 3510 | 21.339 | 11.146 | 2.189109 | 3709 | 10.164 | 1.4169 | 0.356627 |
| -0.41367 | 2716 | 14.838 | 4.645  | 0.912292 | 2546 | 5.6952 | 3.0519 | -0.76815 |
| -0.27392 | 3591 | 11.445 | 1.252  | 0.245897 | 3062 | 3.8863 | 4.8608 | -1.22344 |
| 2.244718 | 2761 | 23.434 | 13.241 | 2.600573 | 3109 | 13.477 | 4.7299 | 1.190493 |
| -0.26878 | 2040 | 4.3627 | 5.8303 | -1.14509 | 3005 | 5.5241 | 3.223  | -0.81121 |
| -0.91359 | 1431 | 6.4291 | 3.7639 | -0.73924 | 2037 | 3.2892 | 5.4579 | -1.37373 |
| -0.22089 | 1405 | 12.598 | 2.405  | 0.472349 | 2609 | 6.2476 | 2.4995 | -0.62911 |
| -0.60872 | 1344 | 7.5149 | 2.6781 | -0.52599 | 1521 | 7.8895 | 0.8576 | -0.21585 |
| -1.06487 | 1028 | 8.9494 | 1.2436 | -0.24425 | 1388 | 6.268  | 2.4791 | -0.62398 |
| 1.447266 | 2564 | 11.817 | 1.624  | 0.318959 | 3548 | 10.147 | 1.3999 | 0.352348 |
| -0.10243 | 1283 | 11.613 | 1.42   | 0.278892 | 940  | 5.9574 | 2.7897 | -0.70215 |
| 0.277764 | 876  | 10.959 | 0.766  | 0.150445 | 1189 | 6.3078 | 2.4393 | -0.61396 |
| -0.6269  | 1538 | 5.2666 | 4.9264 | -0.96756 | 1428 | 7.7731 | 0.974  | -0.24515 |
| -0.60171 | 1639 | 7.0165 | 3.1765 | -0.62387 | 2051 | 7.1672 | 1.5799 | -0.39765 |
| 0.281022 | 1242 | 12.56  | 2.367  | 0.464886 | 993  | 4.6324 | 4.1147 | -1.03565 |
| -0.96712 | 2606 | 7.2141 | 2.9789 | -0.58507 | 2111 | 6.5846 | 2.1625 | -0.54429 |
| -0.48928 | 2014 | 8.3913 | 1.8017 | -0.35386 | 2631 | 6.5374 | 2.2097 | -0.55617 |
| -1.43006 | 1548 | 9.6899 | 0.5031 | -0.09881 | 1252 | 9.0256 | 0.2785 | 0.070097 |
| -0.44355 | 2599 | 8.8496 | 1.3434 | -0.26385 | 2195 | 9.0661 | 0.319  | 0.080291 |
| 0.120351 | 2761 | 18.363 | 8.17   | 1.604613 | 3022 | 13.236 | 4.4889 | 1.129834 |
| -0.3972  | 1717 | 8.7944 | 1.3986 | -0.27469 | 1874 | 9.8719 | 1.1248 | 0.283107 |
| -0.25241 | 1806 | 10.41  | 0.217  | 0.042619 | 2192 | 8.8504 | 0.1033 | 0.026    |
| -0.75548 | 2276 | 7.3814 | 2.8116 | -0.55221 | 3355 | 9.8361 | 1.089  | 0.274096 |
| -0.3671  | 3415 | 9.4583 | 0.7347 | -0.1443  | 2530 | 7.8261 | 0.921  | -0.23181 |

|          |      |        |        |          |      |        |        |          |
|----------|------|--------|--------|----------|------|--------|--------|----------|
| 0.788492 | 1682 | 14.388 | 4.195  | 0.823911 | 3022 | 8.6036 | 0.1435 | -0.03612 |
| -0.61424 | 1871 | 6.6275 | 3.5655 | -0.70028 | 3006 | 8.1836 | 0.5635 | -0.14183 |
| 0.650424 | 1890 | 14.339 | 4.146  | 0.814287 | 2762 | 8.6894 | 0.0577 | -0.01452 |
| -0.69193 | 1629 | 10.866 | 0.673  | 0.132179 | 2072 | 5.4537 | 3.2934 | -0.82893 |
| -0.46295 | 1596 | 14.474 | 4.281  | 0.840802 | 2031 | 6.0069 | 2.7402 | -0.6897  |
| 0.312383 | 969  | 15.273 | 5.08   | 0.997728 | 2741 | 7.7344 | 1.0127 | -0.25489 |
| 0.987244 | 1281 | 13.505 | 3.312  | 0.650487 | 3098 | 5.326  | 3.4211 | -0.86107 |
| 0.523964 | 2644 | 16.188 | 5.995  | 1.177436 | 3183 | 10.902 | 2.1549 | 0.542378 |
| 0.359627 | 1546 | 10.867 | 0.674  | 0.132376 | 3250 | 5.8462 | 2.9009 | -0.73014 |
| -0.15998 | 1808 | 11.007 | 0.814  | 0.159872 | 2773 | 6.383  | 2.3641 | -0.59503 |
| 0.269415 | 1423 | 14.336 | 4.143  | 0.813698 | 2519 | 6.4708 | 2.2763 | -0.57293 |
| 0.702352 | 1937 | 12.494 | 2.301  | 0.451923 | 3111 | 8.7753 | 0.0282 | 0.007098 |
| -0.39313 | 1589 | 11.076 | 0.883  | 0.173424 | 3704 | 4.1037 | 4.6434 | -1.16872 |
| 0.217283 | 2027 | 13.074 | 2.881  | 0.565837 | 3917 | 9.7268 | 0.9797 | 0.246586 |
| 0.395061 | 661  | 8.1694 | 2.0236 | -0.39744 | 2137 | 11.09  | 2.3429 | 0.589697 |
| -0.47953 | 2143 | 14.559 | 4.366  | 0.857496 | 3729 | 8.5278 | 0.2193 | -0.0552  |
| -1.31867 | 1924 | 7.8482 | 2.3448 | -0.46053 | 2784 | 5.5675 | 3.1796 | -0.80029 |
| 0.422145 | 1857 | 14.486 | 4.293  | 0.843158 | 3458 | 8.7623 | 0.0152 | 0.003826 |
| -0.97217 | 1544 | 8.1606 | 2.0324 | -0.39917 | 3326 | 8.659  | 0.0881 | -0.02217 |
| -1.38283 | 1252 | 9.6645 | 0.5285 | -0.1038  | 1935 | 5.6331 | 3.114  | -0.78378 |
| -0.89082 | 2022 | 6.3798 | 3.8132 | -0.74892 | 1517 | 6.0646 | 2.6825 | -0.67517 |
| -0.71547 | 2207 | 8.2465 | 1.9465 | -0.3823  | 2600 | 8.1154 | 0.6317 | -0.159   |
| -1.05445 | 2299 | 9.3954 | 0.7976 | -0.15665 | 2319 | 7.0289 | 1.7182 | -0.43246 |
| 0.961382 | 1607 | 13.69  | 3.497  | 0.686822 | 1460 | 12.192 | 3.4449 | 0.867065 |
| -0.47136 | 897  | 7.4693 | 2.7237 | -0.53494 | 1025 | 9.561  | 0.8139 | 0.204855 |
| 0.228891 | 1448 | 9.7376 | 0.4554 | -0.08944 | 2119 | 11.42  | 2.6729 | 0.672756 |
| 0.521317 | 1519 | 11.916 | 1.723  | 0.338402 | 2225 | 7.0112 | 1.7359 | -0.43692 |
| -0.31035 | 1210 | 11.901 | 1.708  | 0.335456 | 1463 | 11.415 | 2.6679 | 0.671498 |
| -0.07313 | 1344 | 8.7798 | 1.4132 | -0.27756 | 2220 | 10.901 | 2.1539 | 0.542126 |
| 0.122591 | 531  | 10.546 | 0.353  | 0.06933  | 731  | 12.312 | 3.5649 | 0.897268 |
| 1.191902 | 1421 | 16.186 | 5.993  | 1.177044 | 1670 | 13.413 | 4.6659 | 1.174384 |
| -1.04644 | 1282 | 8.1123 | 2.0807 | -0.40866 | 1555 | 12.347 | 3.5999 | 0.906077 |
| 0.232556 | 1509 | 16.435 | 6.242  | 1.225948 | 2585 | 14.855 | 6.1079 | 1.537329 |
| -0.11443 | 2209 | 6.3377 | 3.8553 | -0.75719 | 3175 | 8.4094 | 0.3377 | -0.085   |
| -0.22184 | 882  | 5.3288 | 4.8642 | -0.95534 | 3301 | 13.329 | 4.5819 | 1.153242 |
| -0.52132 | 1340 | 7.7612 | 2.4318 | -0.47761 | 1626 | 10.086 | 1.3389 | 0.336995 |
| 0.429476 | 1798 | 7.119  | 3.074  | -0.60374 | 2521 | 7.4574 | 1.2897 | -0.32461 |
| -0.02179 | 1843 | 5.1546 | 5.0384 | -0.98956 | 3601 | 6.8592 | 1.8879 | -0.47518 |
| -0.19517 | 1632 | 5.2083 | 4.9847 | -0.97901 | 2585 | 9.7099 | 0.9628 | 0.242332 |
| 0.455338 | 2367 | 5.4499 | 4.7431 | -0.93156 | 3581 | 12.734 | 3.9869 | 1.003483 |
| -0.24099 | 2614 | 6.8095 | 3.3835 | -0.66453 | 2170 | 10.876 | 2.1289 | 0.535834 |
| -0.36942 | 2393 | 3.9281 | 6.2649 | -1.23045 | 3783 | 9.9392 | 1.1921 | 0.300046 |
| 0.805598 | 3456 | 16.233 | 6.04   | 1.186275 | 2510 | 18.486 | 9.7389 | 2.451234 |
| 0.442305 | 1267 | 10.734 | 0.541  | 0.106254 | 1830 | 15.628 | 6.8809 | 1.731889 |
| -0.21521 | 2682 | 11.894 | 1.701  | 0.334082 | 2705 | 11.682 | 2.9349 | 0.7387   |
| -0.30067 | 1886 | 8.6957 | 1.4973 | -0.29407 | 1967 | 9.2018 | 0.4547 | 0.114446 |
| -0.01731 | 2057 | 5.0073 | 5.1857 | -1.01849 | 1643 | 8.4601 | 0.287  | -0.07224 |

|          |      |        |        |          |      |        |         |          |
|----------|------|--------|--------|----------|------|--------|---------|----------|
| -0.31817 | 2800 | 9.5357 | 0.6573 | -0.1291  | 3311 | 6.6445 | 2.1026  | -0.52921 |
| 0.260455 | 1512 | 11.31  | 1.117  | 0.219382 | 1816 | 9.8568 | 1.1097  | 0.279306 |
| 0.190403 | 2922 | 12.012 | 1.819  | 0.357257 | 2919 | 14.697 | 5.9499  | 1.497561 |
| 0.056612 | 3070 | 9.3485 | 0.8445 | -0.16586 | 2730 | 9.8535 | 1.1064  | 0.278476 |
| 0.184294 | 3630 | 11.267 | 1.074  | 0.210937 | 3349 | 10.749 | 2.0019  | 0.503869 |
| 1.355017 | 3353 | 18.67  | 8.477  | 1.664909 | 3764 | 17.96  | 9.2129  | 2.318842 |
| -0.63075 | 1909 | 5.1336 | 5.0594 | -0.99368 | 1854 | 8.2524 | 0.4947  | -0.12451 |
| -0.35344 | 3160 | 7.6582 | 2.5348 | -0.49784 | 3618 | 7.0205 | 1.7266  | -0.43458 |
| 0.373882 | 3537 | 10.093 | 0.1    | -0.01964 | 3574 | 12.843 | 4.0959  | 1.030918 |
| -0.76658 | 3670 | 7.5749 | 2.6181 | -0.5142  | 3583 | 7.6472 | 1.0999  | -0.27684 |
| 0.371642 | 3150 | 9.3651 | 0.8279 | -0.1626  | 4409 | 12.202 | 3.4549  | 0.869582 |
| 0.508895 | 4419 | 14.709 | 4.516  | 0.886956 | 4700 | 13     | 4.2529  | 1.070434 |
| -0.35568 | 3504 | 9.0753 | 1.1177 | -0.21952 | 3794 | 12.203 | 3.4559  | 0.869833 |
| 2.455892 | 2180 | 26.514 | 16.321 | 3.205495 | 1863 | 17.391 | 8.6439  | 2.175628 |
| 2.715939 | 2033 | 20.659 | 10.466 | 2.055555 | 3401 | 21.641 | 12.8939 | 3.245332 |
| 2.049427 | 2241 | 23.427 | 13.234 | 2.599198 | 3375 | 10.044 | 1.2969  | 0.326423 |
| 2.022343 | 2449 | 14.087 | 3.894  | 0.764794 | 3346 | 8.0992 | 0.6479  | -0.16307 |
| 0.977877 | 1840 | 11.359 | 1.166  | 0.229006 | 2124 | 9.9341 | 1.187   | 0.298762 |
| 1.697335 | 1891 | 14.913 | 4.72   | 0.927023 | 1238 | 15.59  | 6.8429  | 1.722325 |
| 2.184237 | 2777 | 16.241 | 6.048  | 1.187846 | 2822 | 17.824 | 9.0769  | 2.284612 |
| 2.539588 | 2492 | 17.416 | 7.223  | 1.418619 | 3019 | 12.653 | 3.9059  | 0.983096 |
| 3.277577 | 2653 | 20.015 | 9.822  | 1.929071 | 3465 | 13.535 | 4.7879  | 1.205091 |
| 4.154448 | 2997 | 25.225 | 15.032 | 2.952331 | 2594 | 18.774 | 10.0269 | 2.523722 |
| 4.499617 | 901  | 27.858 | 17.665 | 3.46946  | 1203 | 26.933 | 18.1859 | 4.577303 |
| 4.524258 | 2676 | 21.562 | 11.369 | 2.232907 | 2564 | 22.192 | 13.4449 | 3.384016 |
| 4.337724 | 1798 | 19.466 | 9.273  | 1.821246 | 1842 | 19.87  | 11.1229 | 2.79958  |
| 3.061108 | 2268 | 24.03  | 13.837 | 2.717629 | 1847 | 19.112 | 10.3649 | 2.608795 |
| 1.627079 | 3956 | 11.881 | 1.688  | 0.331528 | 3539 | 18.96  | 10.2129 | 2.570538 |
| 1.684098 | 2896 | 15.504 | 5.311  | 1.043097 | 2946 | 11.575 | 2.8279  | 0.711769 |
| 4.060571 | 2526 | 19.557 | 9.364  | 1.839118 | 2646 | 19.728 | 10.9809 | 2.763839 |
| 2.746892 | 4269 | 12.813 | 2.62   | 0.514576 | 3663 | 21.212 | 12.4649 | 3.137355 |
| 1.949033 | 3844 | 15.531 | 5.338  | 1.0484   | 3386 | 19.374 | 10.6269 | 2.674739 |
| 1.359497 | 3774 | 10.413 | 0.22   | 0.043209 | 3009 | 21.801 | 13.0539 | 3.285604 |
| 1.174592 | 2911 | 26.417 | 16.224 | 3.186443 | 1668 | 22.782 | 14.0349 | 3.532516 |
| 0.739008 | 2503 | 21.894 | 11.701 | 2.298112 | 3088 | 13.536 | 4.7889  | 1.205343 |
| 2.823461 | 2806 | 26.515 | 16.322 | 3.205691 | 2263 | 22.581 | 13.8339 | 3.481926 |
| 0.128496 | 3461 | 11.673 | 1.48   | 0.290677 | 3674 | 10.615 | 1.8679  | 0.470141 |
| 1.124701 | 1947 | 18.593 | 8.4    | 1.649786 | 2533 | 16.107 | 7.3599  | 1.852451 |
| 0.669159 | 1225 | 18.531 | 8.338  | 1.637609 | 1074 | 9.8696 | 1.1225  | 0.282528 |
| 1.711386 | 2081 | 24.123 | 13.93  | 2.735895 | 2571 | 14.352 | 5.6049  | 1.410726 |
| 1.662716 | 2551 | 16.974 | 6.781  | 1.331809 | 2921 | 17.939 | 9.1919  | 2.313557 |
| 1.09782  | 2109 | 17.686 | 7.493  | 1.471648 | 3346 | 14.943 | 6.1959  | 1.559478 |
| 1.990779 | 3611 | 20.991 | 10.798 | 2.12076  | 1506 | 23.639 | 14.8919 | 3.748219 |
| 1.706295 | 2824 | 19.334 | 9.141  | 1.795321 | 2122 | 17.436 | 8.6889  | 2.186954 |
| 1.877963 | 3393 | 20.808 | 10.615 | 2.084819 | 2562 | 17.994 | 9.2469  | 2.3274   |
| 1.735823 | 2699 | 18.933 | 8.74   | 1.716563 | 2172 | 13.996 | 5.2489  | 1.321123 |
| 2.697612 | 1897 | 23.3   | 13.107 | 2.574255 | 1305 | 22.759 | 14.0119 | 3.526728 |



|          |      |        |        |          |      |        |        |          |
|----------|------|--------|--------|----------|------|--------|--------|----------|
| 1.306143 | 3172 | 9.9622 | 0.2308 | -0.04533 | 2617 | 5.6171 | 3.13   | -0.78781 |
| 2.655866 | 4390 | 17.973 | 7.78   | 1.528016 | 2932 | 8.2196 | 0.5275 | -0.13277 |
| 0.037266 | 4148 | 14.923 | 4.73   | 0.928987 | 3438 | 7.7661 | 0.981  | -0.24691 |
| 0.238258 | 3989 | 14.415 | 4.222  | 0.829214 | 3629 | 10.747 | 1.9999 | 0.503365 |
| 1.878574 | 3386 | 21.116 | 10.923 | 2.145311 | 4565 | 11.391 | 2.6439 | 0.665457 |
| 0.115464 | 3001 | 9.0636 | 1.1294 | -0.22182 | 1709 | 11.644 | 2.8969 | 0.729136 |
| -1.04984 | 1760 | 4.9432 | 5.2498 | -1.03108 | 1654 | 4.8972 | 3.8499 | -0.969   |
| 1.185589 | 2033 | 18.396 | 8.203  | 1.611094 | 2628 | 10.616 | 1.8689 | 0.470393 |
| 0.846529 | 1623 | 7.9482 | 2.2448 | -0.44089 | 3241 | 8.7319 | 0.0152 | -0.00383 |
| -0.04154 | 2156 | 11.085 | 0.892  | 0.175192 | 3151 | 11.457 | 2.7099 | 0.682069 |
| 0.974211 | 4314 | 9.388  | 0.805  | -0.1581  | 3816 | 14.649 | 5.9019 | 1.48548  |
| 0.627209 | 2737 | 17.282 | 7.089  | 1.392301 | 2319 | 13.325 | 4.5779 | 1.152235 |
| -0.85325 | 1595 | 7.3354 | 2.8576 | -0.56124 | 3115 | 7.191  | 1.5561 | -0.39166 |
| -0.47063 | 2455 | 5.336  | 4.857  | -0.95393 | 3040 | 7.9934 | 0.7537 | -0.1897  |
| -0.65611 | 3299 | 4.8196 | 5.3734 | -1.05535 | 2979 | 4.8338 | 3.9133 | -0.98496 |
| -0.89603 | 2600 | 8.1154 | 2.0776 | -0.40805 | 2324 | 8.0034 | 0.7437 | -0.18719 |
| 0.542699 | 2250 | 7.4222 | 2.7708 | -0.54419 | 1658 | 10.374 | 1.6269 | 0.409483 |
| -1.32429 | 2102 | 4.5671 | 5.6259 | -1.10494 | 3405 | 9.2805 | 0.5334 | 0.134254 |
| 1.24159  | 2935 | 14.446 | 4.253  | 0.835302 | 2750 | 10.291 | 1.5439 | 0.388592 |
| 1.518132 | 1914 | 11.546 | 1.353  | 0.265733 | 2312 | 11.202 | 2.4549 | 0.617886 |
| -0.75703 | 1290 | 2.4031 | 7.7899 | -1.52996 | 1565 | 4.1534 | 4.5937 | -1.15621 |
| -0.42467 | 3942 | 7.9909 | 2.2021 | -0.4325  | 4427 | 6.4378 | 2.3093 | -0.58124 |
| 0.198956 | 2884 | 10.992 | 0.799  | 0.156926 | 3831 | 8.2224 | 0.5247 | -0.13206 |
| -0.07673 | 2849 | 5.5107 | 4.6823 | -0.91962 | 4309 | 10.49  | 1.7429 | 0.43868  |
| -0.03014 | 3141 | 8.1503 | 2.0427 | -0.40119 | 3797 | 12.141 | 3.3939 | 0.854228 |
| -0.89791 | 2522 | 5.1943 | 4.9987 | -0.98176 | 2856 | 4.4118 | 4.3353 | -1.09117 |
| 0.097951 | 2222 | 12.286 | 2.093  | 0.411072 | 1689 | 9.9467 | 1.1996 | 0.301934 |
| -1.24727 | 1198 | 4.8414 | 5.3516 | -1.05107 | 1373 | 5.4625 | 3.2846 | -0.82672 |
| 1.061369 | 3159 | 9.6866 | 0.5064 | -0.09946 | 2294 | 10.026 | 1.2789 | 0.321893 |
| -0.47603 | 2609 | 6.2476 | 3.9454 | -0.77489 | 2208 | 6.8388 | 1.9083 | -0.48031 |
| 0.388137 | 2534 | 17.245 | 7.052  | 1.385034 | 1965 | 16.641 | 7.8939 | 1.986856 |
| -0.0389  | 1889 | 7.1996 | 2.9934 | -0.58791 | 1699 | 10.359 | 1.6119 | 0.405707 |
| 0.892144 | 2359 | 17.677 | 7.484  | 1.469881 | 2115 | 15.414 | 6.6669 | 1.678027 |
| -1.23796 | 2936 | 6.6757 | 3.5173 | -0.69081 | 3308 | 4.5647 | 4.1824 | -1.05269 |
| -1.21243 | 2352 | 4.4218 | 5.7712 | -1.13348 | 2764 | 6.1867 | 2.5604 | -0.64444 |
| 0.242942 | 2404 | 12.063 | 1.87   | 0.367274 | 2597 | 12.476 | 3.7289 | 0.938546 |
| -0.08492 | 1472 | 11.617 | 1.424  | 0.279678 | 1241 | 12.006 | 3.2589 | 0.820249 |
| 0.670788 | 1824 | 15.241 | 5.048  | 0.991443 | 2270 | 14.758 | 6.0109 | 1.512914 |
| -0.73567 | 981  | 8.6646 | 1.5284 | -0.30018 | 1778 | 5.3431 | 3.404  | -0.85677 |
| -0.89159 | 1961 | 8.1081 | 2.0849 | -0.40948 | 2145 | 7.9254 | 0.8217 | -0.20682 |
| -0.42039 | 778  | 4.3702 | 5.8228 | -1.14362 | 857  | 9.8016 | 1.0545 | 0.265413 |
| -1.42723 | 3166 | 6.3803 | 3.8127 | -0.74883 | 3047 | 4.7916 | 3.9555 | -0.99558 |
| -1.29213 | 2557 | 3.5589 | 6.6341 | -1.30296 | 1973 | 2.6863 | 6.0608 | -1.52547 |
| -0.0613  | 4138 | 8.7482 | 1.4448 | -0.28376 | 3710 | 6.7925 | 1.9546 | -0.49196 |
| -0.54732 | 2212 | 7.3237 | 2.8693 | -0.56354 | 1869 | 6.4741 | 2.273  | -0.5721  |
| -1.20626 | 2169 | 10.143 | 0.05   | -0.00982 | 2136 | 4.2603 | 4.4868 | -1.12931 |
| -1.06416 | 1115 | 5.5605 | 4.6325 | -0.90984 | 820  | 3.0488 | 5.6983 | -1.43423 |

|          |      |        |          |          |      |        |         |          |
|----------|------|--------|----------|----------|------|--------|---------|----------|
| 0.198141 | 1088 | 11.121 | 0.928    | 0.182262 | 1954 | 6.9089 | 1.8382  | -0.46267 |
| -1.29427 | 1525 | 5.4426 | 4.7504   | -0.93299 | 2572 | 3.4992 | 5.2479  | -1.32087 |
| -0.75334 | 1659 | 5.0633 | 5.1297   | -1.00749 | 2781 | 5.2499 | 3.4972  | -0.88023 |
| -0.01344 | 2989 | 6.1224 | 4.0706   | -0.79948 | 3508 | 10.205 | 1.4579  | 0.366946 |
| -0.04175 | 1455 | 11.753 | 1.56     | 0.306389 | 2393 | 5.7668 | 2.9803  | -0.75013 |
| -0.78902 | 957  | 6.1651 | 4.0279   | -0.79109 | 1919 | 7.2955 | 1.4516  | -0.36536 |
| -1.14067 | 1726 | 11.24  | 1.047    | 0.205634 | 2579 | 4.8856 | 3.8615  | -0.97192 |
| -0.17091 | 1835 | 9.5368 | 0.6562   | -0.12888 | 2976 | 8.5013 | 0.2458  | -0.06187 |
| -0.88072 | 1214 | 4.5305 | 5.6625   | -1.11213 | 3123 | 4.8031 | 3.944   | -0.99269 |
| -0.56304 | 1173 | 3.3248 | 6.8682   | -1.34894 | 2499 | 4.8019 | 3.9452  | -0.99299 |
| -0.28143 | 1171 | 3.2451 | 6.9479   | -1.36459 | 1982 | 7.114  | 1.6331  | -0.41104 |
| 0.390988 | 1305 | 16.705 | 6.512    | 1.278977 | 2322 | 14.729 | 5.9819  | 1.505615 |
| -1.03264 | 1685 | 2.908  | 7.285    | -1.4308  | 3281 | 3.0479 | 5.6992  | -1.43446 |
| 1.511412 | 2287 | 20.026 | 9.833    | 1.931231 | 3209 | 15.083 | 6.3359  | 1.594715 |
| -1.02594 | 1399 | 4.1458 | 6.0472   | -1.18769 | 3028 | 4.6235 | 4.1236  | -1.03789 |
| -0.52366 | 651  | 10.292 | 0.099    | 0.019444 | 982  | 6.6191 | 2.128   | -0.53561 |
| -0.51329 | 2549 | 11.887 | 1.694    | 0.332707 | 5360 | 8.8246 | 0.0775  | 0.019506 |
| -0.76599 | 2671 | 9.9588 | 0.2342   | -0.046   | 4925 | 4.2234 | 4.5237  | -1.13859 |
| -0.95171 | 743  | 8.7483 | 1.4447   | -0.28374 | 1518 | 6.0606 | 2.6865  | -0.67618 |
| -0.81187 | 2318 | 3.063  | 7.13     | -1.40035 | 1717 | 7.5713 | 1.1758  | -0.29594 |
| -0.91053 | 848  | 5.4245 | 4.7685   | -0.93655 | 2060 | 6.9417 | 1.8054  | -0.45441 |
| -0.18704 | 1383 | 4.1938 | 5.9992   | -1.17826 | 1784 | 5.157  | 3.5901  | -0.90361 |
| -1.09385 | 1111 | 3.1503 | 7.0427   | -1.38321 | 1205 | 4.4813 | 4.2658  | -1.07368 |
| -0.63841 | 1862 | 9.3448 | 0.8482   | -0.16659 | 2952 | 7.0122 | 1.7349  | -0.43667 |
| -1.1483  | 1719 | 2.3269 | 7.8661   | -1.54493 | 1986 | 4.5821 | 4.165   | -1.04831 |
| -1.46341 | 1607 | 5.1649 | 5.0281   | -0.98753 | 2769 | 5.0199 | 3.7272  | -0.93812 |
| -0.48144 | 617  | 5.0243 | 5.1687   | -1.01515 | 1422 | 7.4543 | 1.2928  | -0.32539 |
| -1.23328 | 1084 | 3.2288 | 6.9642   | -1.36779 | 2265 | 7.6821 | 1.065   | -0.26806 |
| -0.5887  | 1030 | 4.6602 | 5.5328   | -1.08666 | 2570 | 8.3268 | 0.4203  | -0.10579 |
| -0.6278  | 1282 | 10.452 | 0.259    | 0.050868 | 2709 | 7.9365 | 0.8106  | -0.20402 |
| -1.08929 | 783  | 3.1928 | 7.0002   | -1.37486 | 1594 | 5.8971 | 2.85    | -0.71733 |
| -1.4368  | 917  | 6.2159 | 3.9771   | -0.78111 | 2996 | 3.972  | 4.7751  | -1.20187 |
| -1.32865 | 661  | 9.2284 | 0.9646   | -0.18945 | 2163 | 4.0684 | 4.6787  | -1.17761 |
| -1.11419 | 855  | 3.5088 | 6.6842   | -1.3128  | 1994 | 7.9238 | 0.8233  | -0.20722 |
| -1.67469 | 1576 | 1.5863 | 8.6067   | -1.69038 | 3553 | 4.7284 | 4.0187  | -1.01149 |
| -1.14156 | 2144 | 8.3489 | 1.8441   | -0.36219 | 3030 | 5.2145 | 3.5326  | -0.88914 |
| -1.06884 | 2370 | 9.3671 | 0.8259   | -0.16221 | 3021 | 9.4009 | 0.6538  | 0.164558 |
| -1.25534 | 1700 | 5.5882 | 4.6048   | -0.9044  | 1771 | 4.6866 | 4.0605  | -1.02201 |
| -1.68809 | 2158 | 4.0778 | 6.1152   | -1.20104 | 3025 | 3.8347 | 4.9124  | -1.23643 |
|          |      | 10.193 | 3.44025  |          |      | 8.7471 | 2.6845  |          |
|          |      |        | 10.32075 |          |      |        | 8.0535  |          |
|          |      |        | 5.09157  |          |      |        | 3.97306 |          |
|          | 2626 | 34.463 | 2409     | 44.458   | 1663 | 33.734 |         |          |
|          | 2993 | 40.194 | 2499     | 47.059   | 3511 | 37.881 |         |          |
|          | 2879 | 29.871 | 2188     | 52.148   | 2747 | 31.416 |         |          |
|          | 5223 | 40.743 | 3407     | 40.945   | 2970 | 26.229 |         |          |

|          |          |          |          |          |          |          |
|----------|----------|----------|----------|----------|----------|----------|
| mn       | 3430.25  | 36.31775 | 2625.75  | 46.1525  | 2722.75  | 32.315   |
| sd       | 1204.967 | 5.151338 | 536.9739 | 4.717243 | 775.9142 | 4.859407 |
|          | 1036     | 7.1429   | 687      | 7.1325   | 1183     | 7.3542   |
|          | 1228     | 4.5603   | 820      | 5        | 1960     | 5.7653   |
|          | 1121     | 5.7092   | 617      | 9.7245   | 1251     | 10.791   |
|          | 1239     | 6.5375   | 1490     | 4.8322   | 1655     | 8.6405   |
| mn       | 1156     | 5.987475 | 903.5    | 6.6723   | 1512.25  | 8.13775  |
| sd       | 96.08677 | 1.118302 | 399.9621 | 2.288396 | 364.0122 | 2.124065 |
| 3posSD   |          | 15.45401 |          | 14.15173 |          | 14.57822 |
| 3negSD   |          | 3.354907 |          | 6.865187 |          | 6.372196 |
| Sum3SD   |          | 18.80892 |          | 21.01692 |          | 20.95042 |
| MnDiff   |          | 30.33028 |          | 39.4802  |          | 24.17725 |
| SumovrMn |          | 0.620137 |          | 0.532341 |          | 0.866534 |
| 1minus   |          | 0.379863 |          | 0.467659 |          | 0.133466 |

x toxic a,b,c  
x toxic a,b,c  
X toxic b, art a,b

x toxic a,b,c

X toxic b

x      debris a



Y  
Y  
X      debris a,c

X      toxic a

X      debris b,c  
x      toxic a,b,c  
X      toxic a,debris c,a  
x      debris a,b,tox c  
X

X      toxic a  
X      debris c

X      debris c

X      debris c

X      toxic c

Y

X      toxic b,c



|                  |                               |                     |  | cell ct     | % inf         | AD              |
|------------------|-------------------------------|---------------------|--|-------------|---------------|-----------------|
| 50063 A02        | M-014465- DENN/MAI            | 57706 DENND1A       |  | 296         | 23.649        | 14.21225        |
| 50063 A04        | M-013790- KIAA1295            | 57517 KIAA1295      |  | 235         | 15.319        | 5.88225         |
| 50063 A05        | M-023051- zinc finger         | 57547 ZNF624        |  | 541         | 5.3604        | 4.07635         |
| 50063 A06        | M-013788- zinc finger         | 58492 ZNF77         |  | 579         | 8.981         | 0.45575         |
| 50063 A07        | M-014056- immunogl            | 57549 IGSF9         |  | 412         | 8.4951        | 0.94165         |
| 50063 A08        | M-017123- zinc finger         | 58491 ZNF71         |  | 276         | 9.058         | 0.37875         |
| 50063 A09        | M-024432- microtubul          | 57553 MICAL3        |  | 236         | 4.661         | 4.77575         |
| 50063 A10        | M-013787- chromoson           | 58490 C20orf77      |  | 296         | 5.7432        | 3.69355         |
| 50063 A11        | M-008843- neuroligin          | 57555 NLGN2         |  | 211         | 8.5308        | 0.90595         |
| 50063 A12        | M-005929- family with         | 58489 FAM108C1      |  | 166         | 11.446        | 2.00925         |
| 50063 A13        | M-014062- sema doma           | 57556 SEMA6A        |  | 248         | 16.935        | 7.49825         |
| 50063 A14        | M-013786- phosphatid          | 58488 PCTP          |  | 127         | 8.6614        | 0.77535         |
| 50063 A15        | M-023638- intraflagelli       | 57560 IFT80         |  | 552         | 7.2464        | 2.19035         |
| 50063 A16        | M-013782- zinc finger,        | 58486 ZBED5         |  | 463         | 12.959        | 3.52225         |
| 50063 A17        | M-014063- arrestin do         | 57561 ARRDC3        |  | 307         | 13.681        | 4.24425         |
| 50063 A18        | M-013781- trafficking         | 58485 TRAPPC1       |  | 397         | 8.8161        | 0.62065         |
| 50063 A19        | M-029798- KIAA1377            | 57562 KIAA1377      |  | 197         | 12.69         | 3.25325         |
| 50063 A20        | M-013780- chromoson           | 58483 C9orf27       |  | 419         | 11.695        | 2.25825         |
| 50063 A21        | M-019270- kelch-like 8        | 57563 KLHL8         |  | 606         | 11.716        | 2.27925         |
| 50063 A23        | M-023417- kelch-like 1        | 57565 KLHL14        |  | 1126        | 8.1705        | 1.26625         |
| 50063 B02        | M-006835- non-SMC c           | 64151 NCAPG         |  | 3984        | 16.014        | 6.57725         |
| 50063 B04        | M-003851- peptide de          | 64146 PDF           |  | 2748        | 11.645        | 2.20825         |
| 50063 B05        | M-013792- chromoson           | 58493 C9orf80       |  | 3486        | 20.367        | 10.93025        |
| 50063 B06        | M-014036- zinc finger,        | 64145 ZFYVE20       |  | 3709        | 15.503        | 6.06625         |
| 50063 B07        | M-017389- junctional a        | 58494 JAM2          |  | 2689        | 10.264        | 0.82725         |
| <b>50063 B08</b> | <b>M-013041- interferon i</b> | <b>64135 IFIH1</b>  |  | <b>3278</b> | <b>24.649</b> | <b>15.21225</b> |
| 50063 B09        | M-013793- ovo-like 2 (        | 58495 OVOL2         |  | 1425        | 12.281        | 2.84425         |
| 50063 B10        | M-013040- xylosyltran         | 64132 XYLT2         |  | 3346        | 10.759        | 1.32225         |
| 50063 B11        | M-010073- lymphocyte          | 58496 LY6G5B        |  | 2451        | 13.505        | 4.06825         |
| 50063 B12        | M-013749- xylosyltran         | 64131 XYLT1         |  | 2918        | 11.001        | 1.56425         |
| 50063 B13        | M-013799- prune hom           | 58497 PRUNE         |  | 2987        | 10.278        | 0.84125         |
| 50063 B14        | M-009653- lin-7 homo          | 64130 LIN7B         |  | 2425        | 8.7835        | 0.65325         |
| 50063 B15        | M-018036- zinc finger         | 58499 ZNF462        |  | 625         | 9.44          | 0.00325         |
| 50063 B16        | M-017822- Ras-relatec         | 64121 RRAGC         |  | 1623        | 9.4886        | 0.05185         |
| 50063 B17        | M-025860- zinc finger         | 58500 ZNF250        |  | 958         | 10.438        | 1.00125         |
| 50063 B18        | M-015688- dihydrouric         | 64118 DUS1L         |  | 2310        | 10.39         | 0.95325         |
| 50063 B19        | M-031984- proline rich        | 58503 PROL1         |  | 1729        | 11.683        | 2.24625         |
| 50063 B20        | M-007573- solute carri        | 64116 SLC39A8       |  | 2114        | 7.5213        | 1.91545         |
| 50063 B21        | M-019080- Rho GTPasi          | 58504 ARHGAP22      |  | 1605        | 5.7944        | 3.64235         |
| 50063 B23        | M-027193- DC2 protei          | 58505 DC2           |  | 1503        | 9.2482        | 0.18855         |
| 50063 C02        | M-013646- signal reco         | 58477 SRPRB         |  | 1597        | 5.9487        | 3.48805         |
| 50063 C04        | M-031980- tumor prot          | 58476 TP53INP2      |  | 876         | 6.5068        | 2.92995         |
| <b>50063 C05</b> | <b>M-022568- zinc finger</b>  | <b>57567 ZNF319</b> |  | <b>1803</b> | <b>18.192</b> | <b>8.75525</b>  |
| 50063 C06        | M-013778- pleckstrin          | 58473 PLEKHB1       |  | 845         | 3.6686        | 5.76815         |
| 50063 C07        | M-021865- signal-indu         | 57568 SIPA1L2       |  | 750         | 7.4667        | 1.97005         |
| 50063 C08        | M-008271- sulfide quir        | 58472 SQRDL         |  | 1114        | 3.0521        | 6.38465         |

|                  |                           |                     |             |               |                |
|------------------|---------------------------|---------------------|-------------|---------------|----------------|
| 50063 C09        | M-026514- Rho GTPase      | 57569 ARHGAP20      | 802         | 6.6085        | 2.82825        |
| 50063 C10        | M-007876- chemokine       | 58191 CXCL16        | 371         | 6.1995        | 3.23725        |
| 50063 C11        | M-021968- TRM5 tRNA       | 57570 TRMT5         | 518         | 5.2124        | 4.22435        |
| 50063 C12        | M-010046- neurogenic      | 58158 NEUROD4       | 1069        | 6.5482        | 2.88855        |
| 50063 C13        | M-026680- KIAA1394 p      | 57571 KIAA1394      | 559         | 6.7979        | 2.63885        |
| 50063 C14        | M-015869- neuroglobi      | 58157 NGB           | 717         | 6.1367        | 3.30005        |
| 50063 C15        | M-031950- dedicator c     | 57572 DOCK6         | 914         | 10.394        | 0.95725        |
| 50063 C16        | M-021323- polypyrimid     | 58155 PTBP2         | 1271        | 8.0252        | 1.41155        |
| 50063 C17        | M-014067- zinc finger     | 57573 ZNF471        | 1678        | 5.1847        | 4.25205        |
| 50063 C18        | M-025427- mucin 3B, c     | 57876 MUC3B         | 1265        | 4.7431        | 4.69365        |
| 50063 C19        | M-013164- protocadhe      | 57575 PCDH10        | 2835        | 13.086        | 3.64925        |
| 50063 C20        | M-018639- solute carri    | 57864 SLC46A2       | 2793        | 8.8793        | 0.55745        |
| 50063 C21        | M-014068- KIAA1407        | 57577 KIAA1407      | 1260        | 9.2063        | 0.23045        |
| 50063 C23        | M-021995- KIAA1409        | 57578 KIAA1409      | 1765        | 4.7025        | 4.73425        |
| 50063 D02        | M-015095- transmembr      | 64114 TMBIM1        | 4105        | 11.62         | 2.18325        |
| 50063 D04        | M-004430- modulator       | 64112 MOAP1         | 1229        | 12.693        | 3.25625        |
| 50063 D05        | M-031985- serine argir    | 58506 SR-A1         | 1956        | 12.065        | 2.62825        |
| <b>50063 D06</b> | <b>M-019049- melanoma</b> | <b>64110 MAGEF1</b> | <b>3793</b> | <b>19.431</b> | <b>9.99425</b> |
| 50063 D07        | M-031204- chromosom       | 58509 C19orf29      | 2822        | 13.005        | 3.56825        |
| 50063 D08        | M-015207- centromer       | 64105 CENPK         | 1978        | 11.476        | 2.03925        |
| 50063 D09        | M-008278- deoxyribon      | 58511 DNASE2B       | 3752        | 7.9691        | 1.46765        |
| 50063 D10        | M-013888- tenomodul       | 64102 TNMD          | 3050        | 10            | 0.56325        |
| 50063 D11        | M-022309- discs, large    | 58512 DLGAP3        | 3702        | 7.9957        | 1.44105        |
| 50063 D12        | M-013887- leucine rich    | 64101 LRRC4         | 2482        | 8.8638        | 0.57295        |
| 50063 D13        | M-016842- selenoprot      | 58515 SELK          | 3796        | 8.8514        | 0.58535        |
| 50063 D14        | M-013046- epididymal      | 64100 ELSBPB1       | 2442        | 7.1253        | 2.31145        |
| 50063 D15        | M-027166- family with     | 58516 FAM60A        | 1131        | 9.2838        | 0.15295        |
| 50063 D16        | M-017821- parvin, gan     | 64098 PARVG         | 2477        | 8.9625        | 0.47425        |
| 50063 D17        | M-021976- RNA bindin      | 58517 RBM25         | 2561        | 2.6552        | 6.78155        |
| 50063 D18        | M-021335- erythrocyte     | 64097 EPB41L4A      | 4030        | 7.196         | 2.24075        |
| 50063 D19        | M-031240- widely inte     | 58525 WIZ           | 3416        | 5.9133        | 3.52345        |
| 50063 D20        | M-013886- SPARC rela      | 64094 SMOC2         | 2952        | 8.8076        | 0.62915        |
| 50063 D21        | M-015884- MID1 inter      | 58526 MID1IP1       | 2812        | 7.5036        | 1.93315        |
| 50063 D23        | M-024734- chromosom       | 58527 C6orf115      | 4178        | 15.462        | 6.02525        |
| 50063 E02        | M-015864- cell adhesi     | 57863 CADM3         | 1753        | 5.9897        | 3.44705        |
| 50063 E04        | M-014002- zinc finger     | 57862 ZNF410        | 793         | 12.106        | 2.66925        |
| 50063 E05        | M-028640- family with     | 57579 FAM135A       | 2477        | 5.4098        | 4.02695        |
| 50063 E06        | M-007585- solute carri    | 57835 SLC4A5        | 885         | 20.791        | 11.35425       |
| 50063 E07        | M-010063- phosphatid      | 57580 PREX1         | 2498        | 5.1641        | 4.27265        |
| 50063 E08        | M-008902- cytochrom       | 57834 CYP4F11       | 1507        | 4.5786        | 4.85815        |
| 50063 E09        | M-024897- transmembr      | 57583 TMEM181       | 1488        | 18.011        | 8.57425        |
| 50063 E10        | M-014009- keratin assi    | 57830 KRTAP5-8      | 864         | 10.185        | 0.74825        |
| 50063 E11        | M-004775- Rho GTPase      | 57584 ARHGAP21      | 1191        | 4.618         | 4.81875        |
| 50063 E12        | M-013108- zona pelluc     | 57829 ZP4           | 965         | 5.0777        | 4.35905        |
| 50063 E13        | M-022876- Crm, crampr     | 57585 CRAMP1L       | 1648        | 5.8252        | 3.61155        |
| 50063 E14        | M-014008- chromosom       | 57828 C19orf15      | 1122        | 4.5455        | 4.89125        |
| 50063 E15        | M-014082- synaptotag      | 57586 SYT13         | 2185        | 4.5767        | 4.86005        |

|           |                        |                  |      |        |          |
|-----------|------------------------|------------------|------|--------|----------|
| 50063 E16 | M-014006- chromoson    | 57827 C6orf47    | 2154 | 5.2925 | 4.14425  |
| 50063 E17 | M-024112- KIAA1430     | 57587 KIAA1430   | 2290 | 6.1135 | 3.32325  |
| 50063 E18 | M-010057- RAP2C, me    | 57826 RAP2C      | 1489 | 2.955  | 6.48175  |
| 50063 E19 | M-026110- KIAA1432     | 57589 KIAA1432   | 3423 | 6.5148 | 2.92195  |
| 50063 E20 | M-014005- histocomp    | 57824 HMHB1      | 2825 | 7.0442 | 2.39255  |
| 50063 E21 | M-006861- WD repeat    | 57590 WDFY1      | 3107 | 11.201 | 1.76425  |
| 50063 E23 | M-007036- zinc finger  | 57592 ZNF687     | 2992 | 4.2112 | 5.22555  |
| 50063 F02 | M-013885- SPARC rela   | 64093 SMOC1      | 4169 | 8.3713 | 1.06545  |
| 50063 F04 | M-013045- popeye do    | 64091 POPDC2     | 2678 | 17.364 | 7.92725  |
| 50063 F05 | M-015642- myozenin 1   | 58529 MYOZ1      | 1879 | 20.596 | 11.15925 |
| 50063 F06 | M-013884- galactose-3  | 64090 GAL3ST2    | 2300 | 11.304 | 1.86725  |
| 50063 F07 | M-031989- lymphocyte   | 58530 LY6G6D     | 2195 | 18.087 | 8.65025  |
| 50063 F08 | M-013044- sorting nex  | 64089 SNX16      | 2961 | 9.794  | 0.35725  |
| 50063 F09 | M-031990- protamine    | 58531 PRM3       | 2668 | 10.832 | 1.39525  |
| 50063 F10 | M-006414- golgi phosp  | 64083 GOLPH3     | 2082 | 7.4448 | 1.99195  |
| 50063 F11 | M-017557- sorting nex  | 58533 SNX6       | 2065 | 9.4431 | 0.00635  |
| 50063 F12 | M-013882- phenazine    | 64081 PBLD       | 2735 | 11.846 | 2.40925  |
| 50063 F13 | M-015070- membrane     | 58538 MPP4       | 1374 | 16.885 | 7.44825  |
| 50063 F14 | M-007505- solute carri | 64078 SLC28A3    | 2971 | 14.709 | 5.27225  |
| 50063 F15 | M-013841- transmemk    | 58986 TMEM8      | 2614 | 7.4216 | 2.01515  |
| 50063 F16 | M-023671- chromoson    | 64073 C19orf33   | 2544 | 7.5079 | 1.92885  |
| 50063 F17 | M-007970- interleukin  | 59067 IL21       | 2046 | 6.305  | 3.13175  |
| 50063 F18 | M-008498- neuronal P.  | 64067 NPAS3      | 2843 | 10.728 | 1.29125  |
| 50063 F19 | M-009915- ICEBERG ca   | 59082 ICEBERG    | 4380 | 10.251 | 0.81425  |
| 50063 F20 | M-013881- 3-oxoacid C  | 64064 OXCT2      | 3579 | 8.1308 | 1.30595  |
| 50063 F21 | M-016765- chromoson    | 59271 C21orf63   | 2086 | 5.0336 | 4.40315  |
| 50063 F23 | M-013508- calcium cha  | 59283 CACNG8     | 3400 | 5.3529 | 4.08385  |
| 50063 G02 | M-017122- SLAM famil   | 57823 SLAMF7     | 1947 | 8.1664 | 1.27035  |
| 50063 G04 | M-014017- grainyhead   | 57822 GRHL3      | 501  | 13.573 | 4.13625  |
| 50063 G05 | M-024234- KIAA1442 p   | 57593 RP5-860F1! | 813  | 12.177 | 2.74025  |
| 50063 G06 | M-014016- chromoson    | 57821 C1orf114   | 681  | 6.1674 | 3.26935  |
| 50063 G07 | M-014090- homeobox     | 57594 HOMEZ      | 611  | 11.129 | 1.69225  |
| 50063 G08 | M-019251- cyclin B1 in | 57820 CCNB1IP1   | 701  | 11.27  | 1.83325  |
| 50063 G09 | M-014911- PDZ domai    | 57595 PDZD4      | 492  | 11.992 | 2.55525  |
| 50063 G10 | M-017813- LSM2 hom     | 57819 LSM2       | 374  | 11.23  | 1.79325  |
| 50063 G11 | M-014095- likely ortho | 57596 KIAA1446   | 755  | 6.0927 | 3.34405  |
| 50063 G12 | M-010427- KIAA1967     | 57805 KIAA1967   | 548  | 14.964 | 5.52725  |
| 50063 G13 | M-023331- BAH domai    | 57597 BAHCC1     | 363  | 19.835 | 10.39825 |
| 50063 G14 | M-014013- polymerase   | 57804 POLD4      | 952  | 8.1933 | 1.24345  |
| 50063 G15 | M-016462- WD repeat    | 57599 WDR48      | 432  | 9.2593 | 0.17745  |
| 50063 G16 | M-016602- GATA zinc f  | 57798 GATAD1     | 1651 | 11.69  | 2.25325  |
| 50063 G17 | M-031785- KIAA1456 p   | 57604 KIAA1456   | 1021 | 6.4643 | 2.97245  |
| 50063 G18 | M-014022- family with  | 57795 FAM5B      | 1012 | 15.909 | 6.47225  |
| 50063 G19 | M-014106- phosphatid   | 57605 PITPNM2    | 1314 | 12.329 | 2.89225  |
| 50063 G20 | M-017511- splicing fac | 57794 SF4        | 3555 | 7.5949 | 1.84185  |
| 50063 G21 | M-024203- SLAIN moti   | 57606 SLAIN2     | 2531 | 14.066 | 4.62925  |
| 50063 G23 | M-026476- KIAA1462     | 57608 KIAA1462   | 2587 | 7.4604 | 1.97635  |

|                  |                              |                     |             |               |                |
|------------------|------------------------------|---------------------|-------------|---------------|----------------|
| 50063 H02        | M-006013- protease, s        | 64063 PRSS22        | 3002        | 26.349        | 16.91225       |
| 50063 H04        | M-019088- RNA bindin         | 64062 RBM26         | 2747        | 19.185        | 9.74825        |
| 50063 H05        | M-017347- calcium cha        | 59284 CACNG7        | 2004        | 15.22         | 5.78325        |
| 50063 H06        | M-013880- TSPY-like 2        | 64061 TSPYL2        | 3259        | 18.595        | 9.15825        |
| 50063 H07        | M-017454- calcium cha        | 59285 CACNG6        | 2137        | 19.373        | 9.93625        |
| 50063 H08        | M-025326- myosin IG          | 64005 MYO1G         | 1739        | 10.581        | 1.14425        |
| 50063 H09        | M-008082- single imm         | 59307 SIGIRR        | 2448        | 18.342        | 8.90525        |
| 50063 H10        | M-014718- transmemk          | 63982 TMEM16C       | 2209        | 23.631        | 14.19425       |
| 50063 H11        | M-006030- serine carb        | 59342 SCPEP1        | 2193        | 22.572        | 13.13525       |
| 50063 H12        | M-019091- fidgetin-lik       | 63979 FIGNL1        | 2648        | 18.58         | 9.14325        |
| 50063 H13        | M-006033- SUMO1/se           | 59343 SENP2         | 2339        | 15.69         | 6.25325        |
| 50063 H14        | M-008363- PR domain          | 63977 PRDM15        | 2841        | 11.369        | 1.93225        |
| 50063 H15        | M-017814- zinc finger        | 59348 ZNF350        | 2995        | 12.988        | 3.55125        |
| 50063 H16        | M-008708- neurogenic         | 63974 NEUROD6       | 3394        | 11.196        | 1.75925        |
| 50063 H17        | M-015890- kelch-like 1       | 59349 KLHL12        | 2075        | 8.9157        | 0.52105        |
| 50063 H18        | M-009009- neurogenir         | 63973 NEUROG2       | 3410        | 5.2493        | 4.18745        |
| <b>50063 H19</b> | <b>M-013811- prostate ar</b> | <b>59351 PBOV1</b>  | <b>2980</b> | <b>18.557</b> | <b>9.12025</b> |
| 50063 H20        | M-026122- DMRT-like          | 63951 DMRTA1        | 2585        | 12.108        | 2.67125        |
| 50063 H21        | M-013746- transmemk          | 59353 TMEM35        | 3664        | 7.369         | 2.06775        |
| 50063 H23        | M-016463- GC-rich prc        | 60313 GPBP1L1       | 1456        | 8.6538        | 0.78295        |
| 50063 I02        | M-016344- ankyrin rep        | 57763 ANKRA2        | 1274        | 8.0063        | 1.43045        |
| 50063 I04        | M-015227- glucosidase        | 57733 GBA3          | 591         | 8.291         | 1.14575        |
| 50063 I05        | M-022575- RAN bindin         | 57610 RANBP10       | 476         | 3.9916        | 5.44515        |
| 50063 I06        | M-024148- zinc finger,       | 57732 ZFYVE28       | 685         | 8.9051        | 0.53165        |
| <b>50063 I07</b> | <b>M-022273- immunogl</b>    | <b>57611 ISLR2</b>  | <b>1194</b> | <b>11.809</b> | <b>2.37225</b> |
| 50063 I08        | M-014609- spectrin, b        | 57731 SPTBN4        | 523         | 7.8394        | 1.59735        |
| 50063 I09        | M-028936- KIAA1466           | 57612 KIAA1466      | 212         | 13.208        | 3.77125        |
| 50063 I10        | M-022839- KIAA1641           | 57730 KIAA1641      | 858         | 9.9068        | 0.47005        |
| 50063 I11        | M-027045- KIAA1467           | 57613 KIAA1467      | 292         | 3.4247        | 6.01205        |
| 50063 I12        | M-016094- WD repeat          | 57728 WDR19         | 394         | 12.183        | 2.74625        |
| 50063 I13        | M-014115- KIAA1468           | 57614 KIAA1468      | 320         | 10.312        | 0.87525        |
| 50063 I14        | M-023428- KIAA1632           | 57724 KIAA1632      | 143         | 6.993         | 2.44375        |
| <b>50063 I15</b> | <b>M-024008- zinc finger</b> | <b>57615 ZNF492</b> | <b>979</b>  | <b>11.134</b> | <b>1.69725</b> |
| 50063 I16        | M-014170- neighbor o         | 57722 NOPE          | 1186        | 7.4199        | 2.01685        |
| 50063 I17        | M-014119- teashirt far       | 57616 TSHZ3         | 1224        | 6.5359        | 2.90085        |
| 50063 I18        | M-014169- KIAA1627           | 57721 KIAA1627      | 1199        | 4.3369        | 5.09985        |
| 50063 I19        | M-013178- vacuolar pr        | 57617 VPS18         | 2135        | 5.808         | 3.62875        |
| 50063 I20        | M-031248- transmemk          | 57719 TMEM16H       | 1787        | 3.4135        | 6.02325        |
| 50063 I21        | M-014123- shroom far         | 57619 SHROOM3       | 3849        | 5.456         | 3.98075        |
| 50063 I23        | M-013166- stromal int        | 57620 STIM2         | 2093        | 5.2078        | 4.22895        |
| 50063 J02        | M-021793- DMRT-like          | 63950 DMRTA2        | 4064        | 12.475        | 3.03825        |
| 50063 J04        | M-015071- DMRT-like          | 63948 DMRTB1        | 3793        | 13.024        | 3.58725        |
| 50063 J05        | M-013747- chromoson          | 60314 C12orf10      | 2402        | 11.241        | 1.80425        |
| 50063 J06        | M-015059- DMRT-like          | 63947 DMRTC1        | 2050        | 9.0244        | 0.41235        |
| 50063 J07        | M-013974- family with        | 60343 FAM3A         | 2041        | 19.304        | 9.86725        |
| 50063 J08        | M-015058- DMRT-like          | 63946 DMRTC2        | 2089        | 13.787        | 4.35025        |
| 50063 J09        | M-013941- arginine va        | 60370 AVPI1         | 2128        | 18.703        | 9.26625        |

|                  |                           |                       |            |               |                 |
|------------------|---------------------------|-----------------------|------------|---------------|-----------------|
| 50063 J10        | M-013479- amyloid be      | 63941 APBA2BP         | 3000       | 11.4          | 1.96325         |
| 50063 J11        | M-013068- exocyst cor     | 60412 EXOC4           | 2897       | 11.598        | 2.16125         |
| 50063 J12        | M-013906- G-protein s     | 63940 GPSM3           | 3386       | 11.459        | 2.02225         |
| 50063 J13        | M-017339- cadherin-lil    | 60437 CDH26           | 2112       | 10.795        | 1.35825         |
| 50063 J14        | M-013905- chromoson       | 63939 C20orf177       | 3379       | 10.891        | 1.45425         |
| 50063 J15        | M-013975- blepharoph      | 60467 BPESC1          | 2622       | 10.641        | 1.20425         |
| 50063 J16        | M-013904- chromoson       | 63935 C20orf67        | 2594       | 6.7463        | 2.69045         |
| 50063 J17        | M-009260- ELOVL fami      | 60481 ELOVL5          | 2336       | 12.115        | 2.67825         |
| 50063 J18        | M-013903- zinc finger     | 63934 ZNF667          | 3808       | 8.3246        | 1.11215         |
| 50063 J19        | M-007595- solute carri    | 60482 SLC5A7          | 2504       | 9.5447        | 0.10795         |
| 50063 J20        | M-010730- coiled-coil     | 63933 CCDC90A         | 4078       | 10.152        | 0.71525         |
| 50063 J21        | M-013976- hyaluronar      | 60484 HAPLN2          | 3074       | 13.175        | 3.73825         |
| 50063 J23        | M-013070- salvador hc     | 60485 SAV1            | 3549       | 6.5371        | 2.89965         |
| 50063 K02        | M-013156- protocadhe      | 57717 PCDHB16         | 1089       | 25.803        | 16.36625        |
| 50063 K04        | M-019159- sema doma       | 57715 SEMA4G          | 844        | 34.36         | 24.92325        |
| 50063 K05        | M-014129- zinc finger     | 57621 ZBTB2           | 683        | 25.622        | 16.18525        |
| <b>50063 K06</b> | <b>M-023323- KIAA1618</b> | <b>57714 KIAA1618</b> | <b>851</b> | <b>19.624</b> | <b>10.18725</b> |
| 50063 K07        | M-023686- leucine rich    | 57622 LRFN1           | 858        | 28.904        | 19.46725        |
| 50063 K08        | M-026395- Scm-like wi     | 57713 SFMBT2          | 832        | 20.192        | 10.75525        |
| 50063 K09        | M-025840- ZFAT zinc fi    | 57623 ZFAT1           | 859        | 24.447        | 15.01025        |
| 50063 K10        | M-014190- zinc finger     | 57711 ZNF529          | 585        | 23.932        | 14.49525        |
| 50063 K11        | M-023134- KIAA1486 p      | 57624 KIAA1486        | 224        | 48.661        | 39.22425        |
| 50063 K12        | M-021882- KIAA1614        | 57710 KIAA1614        | 134        | 44.03         | 34.59325        |
| 50063 K13        | M-010912- kelch-like 1    | 57626 KLHL1           | 373        | 28.15         | 18.71325        |
| 50063 K14        | M-007340- solute carri    | 57709 SLC7A14         | 694        | 19.597        | 10.16025        |
| 50063 K15        | M-008971- dipeptidyl-     | 57628 DPP10           | 1553       | 14.81         | 5.37325         |
| 50063 K16        | M-009375- glucosidase     | 57704 GBA2            | 1517       | 12.657        | 3.22025         |
| 50063 K17        | M-007037- SH3 domai       | 57630 SH3RF1          | 1434       | 22.594        | 13.15725        |
| 50063 K18        | M-023101- KIAA1604 p      | 57703 KIAA1604        | 276        | 32.246        | 22.80925        |
| 50063 K19        | M-014131- leucine-rich    | 57631 LRCH2           | 1145       | 13.886        | 4.44925         |
| 50063 K20        | M-026953- KIAA1602        | 57701 KIAA1602        | 1199       | 12.761        | 3.32425         |
| 50063 K21        | M-019481- leucine rich    | 57633 LRRN1           | 3327       | 9.8888        | 0.45205         |
| 50063 K23        | M-021272- E1A bindin      | 57634 EP400           | 976        | 12.09         | 2.65325         |
| 50063 L02        | M-013901- chromoson       | 63932 CXorf56         | 2588       | 25.193        | 15.75625        |
| 50063 L04        | M-013050- mitochond       | 63931 MRPS14          | 4124       | 28.371        | 18.93425        |
| 50063 L05        | M-013978- tRNA meth       | 60487 TRMT11          | 3576       | 21.756        | 12.31925        |
| 50063 L06        | M-013917- chromoson       | 63930 C20orf51        | 4203       | 29.527        | 20.09025        |
| 50063 L07        | M-013071- mitochond       | 60488 MRPS35          | 2020       | 24.356        | 14.91925        |
| 50063 L08        | M-013916- hepatocell      | 63928 LOC63928        | 3492       | 19.53         | 10.09325        |
| 50063 L09        | M-015916- phosphopa       | 60490 PPCDC           | 2463       | 20.3          | 10.86325        |
| 50063 L10        | M-016173- zinc finger     | 63925 ZNF335          | 2763       | 18.132        | 8.69525         |
| 50063 L11        | M-013979- NIF3 NGG1       | 60491 NIF3L1          | 2422       | 24.071        | 14.63425        |
| 50063 L12        | M-016168- cell death-i    | 63924 CIDEC           | 3538       | 20.04         | 10.60325        |
| 50063 L13        | M-016774- coiled-coil     | 60492 CCDC90B         | 2132       | 20.966        | 11.52925        |
| 50063 L14        | M-021879- tenascin N      | 63923 TNN             | 3551       | 14.756        | 5.31925         |
| 50063 L15        | M-017125- FAST kinase     | 60493 FASTKD5         | 3185       | 15.039        | 5.60225         |
| 50063 L16        | M-013915- CTF18, chr      | 63922 CHTF18          | 2777       | 11.523        | 2.08625         |

|           |                        |                 |      |        |          |
|-----------|------------------------|-----------------|------|--------|----------|
| 50063 L17 | M-013980- coiled-coil  | 60494 CCDC81    | 2595 | 10.636 | 1.19925  |
| 50063 L18 | M-013914- dJ467N11.    | 63921 DJ467N11. | 2397 | 12.808 | 3.37125  |
| 50063 L19 | M-003675- heparanase   | 60495 HPSE2     | 3683 | 11.404 | 1.96725  |
| 50063 L20 | M-018241- transposon   | 63920 LOC63920  | 3541 | 12.228 | 2.79125  |
| 50063 L21 | M-009468- ATP/GTP bi   | 60509 AGBL5     | 3310 | 10.151 | 0.71425  |
| 50063 L23 | M-009926- chromosom    | 60526 C2orf43   | 2920 | 7.7055 | 1.73125  |
| 50063 M02 | M-026315- KIAA1600     | 57700 KIAA1600  | 1652 | 3.9952 | 5.44155  |
| 50063 M04 | M-016175- KIAA1598     | 57698 KIAA1598  | 1618 | 5.9333 | 3.50345  |
| 50063 M05 | M-023061- Rho GTPasi   | 57636 ARHGAP23  | 1002 | 4.5908 | 4.84595  |
| 50063 M06 | M-021955- Fanconi an   | 57697 FANCM     | 781  | 4.3534 | 5.08335  |
| 50063 M07 | M-021991- KIAA1509     | 57641 KIAA1509  | 832  | 4.4471 | 4.98965  |
| 50063 M08 | M-027082- DEAD (Asp-   | 57696 DDX55     | 844  | 9.2417 | 0.19505  |
| 50063 M09 | M-024094- collagen, ty | 57642 COL20A1   | 665  | 1.3534 | 8.08335  |
| 50063 M10 | M-017121- zinc finger  | 57693 ZNF317    | 268  | 4.1045 | 5.33225  |
| 50063 M11 | M-021787- zinc finger, | 57643 ZSWIM5    | 307  | 7.8176 | 1.61915  |
| 50063 M12 | M-014189- melanoma     | 57692 MAGEE1    | 541  | 8.1331 | 1.30365  |
| 50063 M13 | M-031354- myosin, he   | 57644 MYH7B     | 520  | 8.0769 | 1.35985  |
| 50063 M14 | M-025116- KIAA1586     | 57691 KIAA1586  | 753  | 2.656  | 6.78075  |
| 50063 M15 | M-017451- pogo transp  | 57645 POGK      | 1086 | 3.3149 | 6.12185  |
| 50063 M16 | M-019399- trinucleotic | 57690 TNRC6C    | 309  | 5.178  | 4.25875  |
| 50063 M17 | M-019073- DEAH (Asp-   | 57647 DHX37     | 1388 | 4.2507 | 5.18605  |
| 50063 M18 | M-026791- leucine rich | 57689 LRRC4C    | 1024 | 3.7109 | 5.72585  |
| 50063 M19 | M-010728- KIAA1522     | 57648 KIAA1522  | 1302 | 4.2243 | 5.21245  |
| 50063 M20 | M-024465- zinc finger, | 57688 ZSWIM6    | 1806 | 4.6512 | 4.78555  |
| 50063 M21 | M-009736- PHD finger   | 57649 PHF12     | 2042 | 5.4848 | 3.95195  |
| 50063 M23 | M-014135- KIAA1524     | 57650 KIAA1524  | 1074 | 3.9106 | 5.52615  |
| 50063 N02 | M-007042- UDP-N-ace    | 63917 GALNT11   | 1221 | 13.677 | 4.24025  |
| 50063 N04 | M-019222- engulfmen    | 63916 ELMO2     | 4005 | 11.885 | 2.44825  |
| 50063 N05 | M-021270- GUF1 GTPa    | 60558 GUF1      | 4088 | 13.601 | 4.16425  |
| 50063 N06 | M-031754- muted hor    | 63915 MUTED     | 3202 | 13.554 | 4.11725  |
| 50063 N07 | M-010124- signal pept  | 60559 SPCS3     | 3319 | 8.3158 | 1.12095  |
| 50063 N08 | M-017820- chromosom    | 63910 C2orf59   | 2490 | 14.498 | 5.06125  |
| 50063 N09 | M-021268- MAK10 hor    | 60560 MAK10     | 2488 | 6.4711 | 2.96565  |
| 50063 N10 | M-013927- G patch do   | 63906 GPATCH3   | 4609 | 8.5268 | 0.90995  |
| 50063 N11 | M-004976- RAD50 inte   | 60561 RINT1     | 3795 | 9.4335 | 0.00325  |
| 50063 N12 | M-015357- mannosida    | 63905 MANBAL    | 2600 | 7.4615 | 1.97525  |
| 50063 N13 | M-014916- short coile  | 60592 SCOC      | 1567 | 7.1474 | 2.28935  |
| 50063 N14 | M-013926- family with  | 63901 FAM111A   | 1209 | 6.4516 | 2.98515  |
| 50063 N15 | M-006258- potassium    | 60598 KCNK15    | 2227 | 7.5438 | 1.89295  |
| 50063 N16 | M-017819- NOL1/NOP     | 63899 NSUN3     | 3213 | 4.793  | 4.64375  |
| 50063 N17 | M-013065- DEAH (Asp-   | 60625 DHX35     | 1836 | 5.0654 | 4.37135  |
| 50063 N18 | M-007724- SH2 domai    | 63898 SH2D4A    | 2377 | 5.4691 | 3.96765  |
| 50063 N19 | M-016121- resistance f | 60626 RIC8A     | 2679 | 3.994  | 5.44275  |
| 50063 N20 | M-013925- family with  | 63895 FAM38B    | 2583 | 2.5165 | 6.92025  |
| 50063 N21 | M-021269- invasion inl | 60672 RP5-1077B | 2723 | 4.1131 | 5.32365  |
| 50063 N23 | M-017816- chromosom    | 60673 C12orf44  | 1952 | 3.125  | 6.31175  |
| 50063 O02 | M-008897- KIAA1576 p   | 57687 KIAA1576  | 460  | 20.652 | 11.21525 |

|           |                             |                 |      |         |          |
|-----------|-----------------------------|-----------------|------|---------|----------|
| 50063 O04 | M-014178- cache dom         | 57685 CACHD1    | 1292 | 22.755  | 13.31825 |
| 50063 O05 | M-026179- KIAA1529          | 57653 KIAA1529  | 1315 | 6.1597  | 3.27705  |
| 50063 O06 | M-017893- zinc finger       | 57684 ZBTB26    | 701  | 9.2725  | 0.16425  |
| 50063 O07 | M-024139- KIAA1530          | 57654 KIAA1530  | 847  | 8.5006  | 0.93615  |
| 50063 O08 | M-028011- zinc finger,      | 57683 ZDBF2     | 1821 | 6.3701  | 3.06665  |
| 50063 O09 | M-014143- GRAM dom          | 57655 GRAMD1A   | 1134 | 8.2892  | 1.14755  |
| 50063 O10 | M-030271- chromodor         | 57680 CHD8      | 195  | 16.923  | 7.48625  |
| 50063 O11 | M-007038- calcium bir       | 57658 CALCOCO1  | 747  | 8.9692  | 0.46755  |
| 50063 O12 | M-009946- glycerol-3- $\mu$ | 57678 GPAM      | 259  | 10.811  | 1.37425  |
| 50063 O13 | M-014149- zinc finger       | 57659 ZBTB4     | 297  | 15.825  | 6.38825  |
| 50063 O14 | M-023324- ring finger       | 57674 RNF213    | 556  | 15.647  | 6.21025  |
| 50063 O15 | M-026727- CTD-bindin        | 57661 KIAA1542  | 922  | 5.6399  | 3.79685  |
| 50063 O16 | M-024750- KIAA1553          | 57673 KIAA1553  | 642  | 5.6075  | 3.82925  |
| 50063 O17 | M-024077- KIAA1543          | 57662 KIAA1543  | 634  | 8.6751  | 0.76165  |
| 50063 O18 | M-025462- KIAA1549          | 57670 KIAA1549  | 979  | 2.145   | 7.29175  |
| 50063 O19 | M-020795- pleckstrin l      | 57664 PLEKHA4   | 919  | 2.5027  | 6.93405  |
| 50063 O20 | M-010729- erythrocyte       | 57669 EPB41L5   | 1609 | 3.0454  | 6.39135  |
| 50063 O21 | M-009103- retinol deh       | 57665 RDH14     | 1423 | 4.2867  | 5.15005  |
| 50063 O23 | M-023934- KIAA1546          | 57667 KIAA1546  | 934  | 4.4968  | 4.93995  |
| 50063 P02 | M-016131- chromosom         | 63894 C14orf133 | 2088 | 6.9923  | 2.44445  |
| 50063 P04 | M-032022- thyroid ade       | 63892 THADA     | 2671 | 8.8731  | 0.56365  |
| 50063 P05 | M-021267- prokineticin      | 60675 PROK2     | 2088 | 7.3755  | 2.06125  |
| 50063 P06 | M-007041- ring finger       | 63891 RNF123    | 2828 | 4.0665  | 5.37025  |
| 50063 P07 | M-005998- pappalysin        | 60676 PAPP2     | 3201 | 14.777  | 5.34025  |
| 50063 P08 | M-013924- chromosom         | 63877 C10orf84  | 2739 | 13.801  | 4.36425  |
| 50063 P09 | M-015854- bruno-like        | 60677 BRUNOL6   | 2753 | 10.679  | 1.24225  |
| 50063 P10 | M-013049- mitochond         | 63875 MRPL17    | 4010 | 7.3566  | 2.08015  |
| 50063 P11 | M-003907- eukaryotic        | 60678 EEFSEC    | 4245 | 10.86   | 1.42325  |
| 50063 P12 | M-016130- brevican          | 63827 BCAN      | 3405 | 8.928   | 0.50875  |
| 50063 P13 | M-016648- bruno-like        | 60680 BRUNOL5   | 298  | 14.765  | 5.32825  |
| 50063 P14 | M-008788- serine race       | 63826 SRR       | 2418 | 9.6361  | 0.19935  |
| 50063 P15 | M-008360- FK506 bind        | 60681 FKBP10    | 1513 | 11.17   | 1.73325  |
| 50063 P16 | M-008368- elastase 2A       | 63036 ELA2A     | 4670 | 6.8308  | 2.60595  |
| 50063 P17 | M-017275- stromal me        | 60682 SMAP1     | 2788 | 4.878   | 4.55875  |
| 50063 P18 | M-019215- BCL6 co-rej       | 63035 BCORL1    | 3332 | 5.2521  | 4.18465  |
| 50063 P19 | M-016784- FLJ12716 p        | 60684 FLJ12716  | 2416 | 8.7748  | 0.66195  |
| 50063 P20 | M-015812- chromosom         | 63027 C6orf85   | 3465 | 3.9538  | 5.48295  |
| 50063 P21 | M-008570- zinc finger,      | 60685 ZFAND3    | 2010 | 3.2338  | 6.20295  |
| 50063 P23 | M-013989- chromosom         | 60686 C14orf93  | 1344 | 7.4405  | 1.99625  |
|           |                             | MAD             |      | 9.43675 | 3.31165  |
|           |                             | MAD3            |      |         | 9.93495  |
|           |                             | MADc            |      |         | 4.901242 |
| 50063 C22 | Human4 Pc RNAi              | empty           |      |         |          |
| 50063 D22 | Human4 Pc RNAi              | empty           |      |         |          |
| 50063 E22 | Human4 Pc RNAi              | empty           |      |         |          |
| 50063 F22 | Human4 Pc RNAi              | empty           |      |         |          |

|           |                |       |
|-----------|----------------|-------|
| 50063 G22 | Human4 Pc RNAi | empty |
| 50063 H22 | Human4 Pc RNAi | empty |
| 50063 I22 | Human4 Pc RNAi | empty |
| 50063 J22 | Human4 Pc RNAi | empty |

|           |                |                                                         |
|-----------|----------------|---------------------------------------------------------|
| 50063 K03 | Human4 Pc RNAi | library cont Dharmacor D-001600-( siGLO RISC-free siRNA |
| 50063 L03 | Human4 Pc RNAi | library cont Dharmacor D-001600-( siGLO RISC-free siRNA |

|           |                |                                                           |      |
|-----------|----------------|-----------------------------------------------------------|------|
| 50063 G03 | Human4 Pc RNAi | library cont Dharmacor M-003290- polo-like ki             | 5347 |
| 50063 H03 | Human4 Pc RNAi | library cont Dharmacor M-003290- polo-like ki             | 5347 |
| 50063 I03 | Human4 Pc RNAi | library cont Dharmacor D-001206-: siControl non-targeting |      |
| 50063 J03 | Human4 Pc RNAi | library cont Dharmacor D-001206-: siControl non-targeting |      |



| rZ              | cell ct     | % inf         | AD              | rZ              | cell ct     | % inf         | AD             | rZ              |
|-----------------|-------------|---------------|-----------------|-----------------|-------------|---------------|----------------|-----------------|
| 2.899724        | 2236        | 7.1556        | 2.80455         | -0.65302        | 3251        | 14.918        | 5.1316         | 1.001762        |
| 1.200155        | 3417        | 10.418        | 0.45785         | 0.106607        | 2217        | 10.419        | 0.6326         | 0.123493        |
| -0.8317         | 1826        | 7.5575        | 2.40265         | -0.55944        | 1852        | 5.0756        | 4.7108         | -0.91962        |
| -0.09299        | 3017        | 10.275        | 0.31485         | 0.073311        | 3324        | 9.627         | 0.1594         | -0.03112        |
| -0.19212        | 3201        | 4.7485        | 5.21165         | -1.2135         | 2458        | 6.3873        | 3.3991         | -0.66355        |
| -0.07728        | 2921        | 9.1749        | 0.78525         | -0.18284        | 1323        | 7.483         | 2.3034         | -0.44966        |
| -0.9744         | 4039        | 7.4523        | 2.50785         | -0.58394        | 2515        | 5.169         | 4.6174         | -0.90138        |
| -0.75359        | 2487        | 7.2376        | 2.72255         | -0.63393        | 3280        | 10.61         | 0.8236         | 0.160778        |
| -0.18484        | 2131        | 3.9887        | 5.97145         | -1.39041        | 974         | 5.4415        | 4.3449         | -0.84819        |
| 0.409947        | 1317        | 13.364        | 3.40385         | 0.792563        | 1082        | 12.2          | 2.4136         | 0.471169        |
| 1.529867        | 1782        | 8.0247        | 1.93545         | -0.45066        | 2599        | 7.349         | 2.4374         | -0.47582        |
| -0.15819        | 3083        | 9.8605        | 0.09965         | -0.0232         | 2057        | 8.3131        | 1.4733         | -0.28761        |
| -0.4469         | 2403        | 4.8689        | 5.09125         | -1.18546        | 1637        | 6.964         | 2.8224         | -0.55097        |
| 0.718644        | 3824        | 10.251        | 0.29085         | 0.067722        | 3510        | 10.912        | 1.1256         | 0.219733        |
| 0.865954        | 3522        | 7.6377        | 2.32245         | -0.54077        | 3255        | 8.0184        | 1.768          | -0.34514        |
| -0.12663        | 2726        | 6.1629        | 3.79725         | -0.88416        | 2948        | 7.5645        | 2.2219         | -0.43375        |
| 0.66376         | 3822        | 10.44         | 0.47985         | 0.11173         | 3584        | 12.528        | 2.7416         | 0.535199        |
| 0.460751        | 1769        | 4.1832        | 5.77695         | -1.34512        | 1947        | 4.7252        | 5.0612         | -0.98802        |
| 0.465035        | 1829        | 7.4904        | 2.46975         | -0.57506        | 3134        | 8.679         | 1.1074         | -0.21618        |
| -0.25835        | 1915        | 6.423         | 3.53715         | -0.8236         | 1975        | 6.3797        | 3.4067         | -0.66504        |
| 1.341956        | 4831        | 14.428        | 4.46785         | 1.040308        | 4379        | 18.36         | 8.5736         | 1.673689        |
| 0.450549        | 3502        | 9.7087        | 0.25145         | -0.05855        | 2150        | 9.2558        | 0.5306         | -0.10358        |
| 2.230098        | 5655        | 15.19         | 5.22985         | 1.217734        | 4730        | 16.934        | 7.1476         | 1.395314        |
| 1.237696        | 4054        | 11.791        | 1.83085         | 0.426301        | 4034        | 12.419        | 2.6326         | 0.513921        |
| 0.168784        | 4739        | 8.6938        | 1.26635         | -0.29486        | 4459        | 8.9482        | 0.8382         | -0.16363        |
| <b>3.103754</b> | <b>4588</b> | <b>26.439</b> | <b>16.47885</b> | <b>3.836986</b> | <b>4393</b> | <b>22.354</b> | <b>12.5676</b> | <b>2.453375</b> |
| 0.580312        | 3183        | 8.891         | 1.06915         | -0.24894        | 1297        | 9.4063        | 0.3801         | -0.0742         |
| 0.269779        | 5618        | 11.107        | 1.14685         | 0.267036        | 4629        | 8.6196        | 1.1668         | -0.22778        |
| 0.830045        | 3712        | 17.214        | 7.25385         | 1.689009        | 2640        | 14.205        | 4.4186         | 0.862574        |
| 0.319154        | 3380        | 7.8994        | 2.06075         | -0.47983        | 4677        | 6.842         | 2.9444         | -0.57479        |
| 0.17164         | 3322        | 11.71         | 1.74985         | 0.40744         | 3508        | 10.975        | 1.1886         | 0.232032        |
| -0.13328        | 4385        | 9.8518        | 0.10835         | -0.02523        | 3902        | 6.0226        | 3.7638         | -0.73475        |
| 0.000663        | 1797        | 5.4535        | 4.50665         | -1.04934        | 1500        | 6.3333        | 3.4531         | -0.67409        |
| 0.010579        | 4122        | 6.9141        | 3.04605         | -0.70925        | 2742        | 5.1787        | 4.6077         | -0.89949        |
| 0.204285        | 2161        | 7.6354        | 2.32475         | -0.5413         | 1857        | 9.5854        | 0.201          | -0.03924        |
| 0.194492        | 4645        | 13.628        | 3.66785         | 0.854033        | 3942        | 7.8133        | 1.9731         | -0.38518        |
| 0.458302        | 3989        | 8.1975        | 1.76265         | -0.41042        | 3703        | 8.3986        | 1.3878         | -0.27092        |
| -0.39081        | 5253        | 15.762        | 5.80185         | 1.350921        | 4569        | 11.687        | 1.9006         | 0.371024        |
| -0.74315        | 3784        | 3.8319        | 6.12825         | -1.42692        | 3890        | 3.4961        | 6.2903         | -1.22796        |
| -0.03847        | 4194        | 7.2961        | 2.66405         | -0.62031        | 2866        | 4.3964        | 5.39           | -1.0522         |
| -0.71167        | 4063        | 6.7192        | 3.24095         | -0.75463        | 2710        | 6.0886        | 3.6978         | -0.72186        |
| -0.5978         | 3360        | 7.1131        | 2.84705         | -0.66292        | 2044        | 12.769        | 2.9826         | 0.582246        |
| <b>1.786333</b> | <b>3488</b> | <b>25.975</b> | <b>16.01485</b> | <b>3.728947</b> | <b>3362</b> | <b>27.811</b> | <b>18.0246</b> | <b>3.518659</b> |
| -1.17688        | 2810        | 3.0605        | 6.89965         | -1.60654        | 1987        | 4.8817        | 4.9047         | -0.95747        |
| -0.40195        | 3934        | 6.7616        | 3.19855         | -0.74476        | 2393        | 8.4831        | 1.3033         | -0.25442        |
| -1.30266        | 5793        | 5.2995        | 4.66065         | -1.0852         | 4017        | 5.0784        | 4.708          | -0.91907        |

|                 |             |               |                |                 |             |               |               |                 |
|-----------------|-------------|---------------|----------------|-----------------|-------------|---------------|---------------|-----------------|
| -0.57705        | 3352        | 13.992        | 4.03185        | 0.938788        | 1223        | 12.428        | 2.6416        | 0.515678        |
| -0.6605         | 3700        | 8.2432        | 1.71695        | -0.39978        | 1731        | 7.9145        | 1.8719        | -0.36542        |
| -0.86189        | 2978        | 9.503         | 0.45715        | -0.10644        | 2307        | 10.88         | 1.0936        | 0.213486        |
| -0.58935        | 4277        | 13.374        | 3.41385        | 0.794891        | 3058        | 8.7966        | 0.9898        | -0.19322        |
| -0.5384         | 2333        | 3.7291        | 6.23105        | -1.45086        | 1645        | 6.1398        | 3.6466        | -0.71187        |
| -0.67331        | 2563        | 10.105        | 0.14485        | 0.033727        | 958         | 5.428         | 4.3584        | -0.85082        |
| 0.195308        | 4177        | 18.339        | 8.37885        | 1.950957        | 1894        | 17.001        | 7.2146        | 1.408393        |
| -0.288          | 4392        | 9.1758        | 0.78435        | -0.18263        | 1597        | 7.201         | 2.5854        | -0.50471        |
| -0.86755        | 4468        | 5.0358        | 4.92435        | -1.1466         | 2380        | 6.8067        | 2.9797        | -0.58168        |
| -0.95765        | 2517        | 9.5749        | 0.38525        | -0.0897         | 1188        | 7.7441        | 2.0423        | -0.39869        |
| 0.744556        | 4555        | 8.5401        | 1.42005        | -0.33065        | 2918        | 10.247        | 0.4606        | 0.089916        |
| -0.11374        | 4196        | 10.701        | 0.74085        | 0.172502        | 1836        | 9.2593        | 0.5271        | -0.1029         |
| -0.04702        | 1368        | 10.015        | 0.05485        | 0.012771        | 755         | 6.3576        | 3.4288        | -0.66935        |
| -0.96593        | 2147        | 6.9399        | 3.02025        | -0.70324        | 2228        | 5.9246        | 3.8618        | -0.75388        |
| 0.445448        | 3089        | 5.6653        | 4.29485        | -1.00003        | 4142        | 9.1502        | 0.6362        | -0.1242         |
| 0.664372        | 2044        | 11.301        | 1.34085        | 0.312208        | 1804        | 12.639        | 2.8526        | 0.556868        |
| 0.536242        | 1765        | 6.4589        | 3.50125        | -0.81524        | 1544        | 9.5207        | 0.2657        | -0.05187        |
| <b>2.039126</b> | <b>3086</b> | <b>19.345</b> | <b>9.38485</b> | <b>2.185197</b> | <b>2380</b> | <b>17.815</b> | <b>8.0286</b> | <b>1.567297</b> |
| 0.72803         | 3312        | 13.104        | 3.14385        | 0.732024        | 2185        | 11.762        | 1.9756        | 0.385665        |
| 0.416068        | 3096        | 11.628        | 1.66785        | 0.388347        | 2353        | 14.407        | 4.6206        | 0.902007        |
| -0.29944        | 5112        | 7.6095        | 2.35065        | -0.54733        | 3310        | 5.9517        | 3.8347        | -0.74859        |
| 0.11492         | 3462        | 11.063        | 1.10285        | 0.256791        | 2180        | 10.046        | 0.2596        | 0.050678        |
| -0.29402        | 3198        | 8.1301        | 1.83005        | -0.42611        | 2019        | 8.7172        | 1.0692        | -0.20872        |
| -0.1169         | 3011        | 7.3398        | 2.62035        | -0.61013        | 2422        | 6.3171        | 3.4693        | -0.67726        |
| -0.11943        | 3449        | 5.1319        | 4.82825        | -1.12422        | 2355        | 6.5817        | 3.2047        | -0.6256         |
| -0.4716         | 2951        | 3.8631        | 6.09705        | -1.41966        | 1571        | 6.3654        | 3.421         | -0.66783        |
| -0.03121        | 1426        | 5.6101        | 4.35005        | -1.01288        | 1023        | 13.392        | 3.6056        | 0.703865        |
| -0.09676        | 4168        | 10.437        | 0.47685        | 0.111031        | 2891        | 7.7136        | 2.0728        | -0.40464        |
| -1.38364        | 2454        | 2.8932        | 7.06695        | -1.64549        | 1653        | 4.6582        | 5.1282        | -1.0011         |
| -0.45718        | 4994        | 7.7693        | 2.19085        | -0.51012        | 3269        | 6.5158        | 3.2706        | -0.63847        |
| -0.71889        | 3735        | 5.8902        | 4.06995        | -0.94766        | 3110        | 6.3666        | 3.4198        | -0.66759        |
| -0.12837        | 2570        | 8.1323        | 1.82785        | -0.4256         | 2567        | 10.83         | 1.0436        | 0.203726        |
| -0.39442        | 3656        | 7.3578        | 2.60235        | -0.60594        | 2616        | 6.9572        | 2.8292        | -0.5523         |
| 1.229331        | 3587        | 12.88         | 2.91985        | 0.679867        | 2996        | 11.115        | 1.3286        | 0.259362        |
| -0.7033         | 3403        | 7.1995        | 2.76065        | -0.6428         | 3920        | 13.903        | 4.1166        | 0.803619        |
| 0.544607        | 2305        | 8.1562        | 1.80395        | -0.42004        | 2663        | 15.096        | 5.3096        | 1.03651         |
| -0.82162        | 4003        | 4.4217        | 5.53845        | -1.28959        | 3624        | 7.8918        | 1.8946        | -0.36985        |
| 2.316607        | 1846        | 11.213        | 1.25285        | 0.291717        | 1323        | 18.216        | 8.4296        | 1.645578        |
| -0.87175        | 4682        | 3.695         | 6.26515        | -1.4588         | 3103        | 5.4786        | 4.3078        | -0.84094        |
| -0.99121        | 3797        | 2.7127        | 7.24745        | -1.68752        | 2782        | 5.284         | 4.5024        | -0.87893        |
| 1.749404        | 3177        | 17.218        | 7.25785        | 1.68994         | 2057        | 18.23         | 8.4436        | 1.648311        |
| 0.152665        | 3169        | 6.5951        | 3.36505        | -0.78353        | 2378        | 12.363        | 2.5766        | 0.502989        |
| -0.98317        | 4208        | 8.8165        | 1.14365        | -0.26629        | 2504        | 8.147         | 1.6394        | -0.32003        |
| -0.88938        | 1636        | 4.401         | 5.55915        | -1.29441        | 2119        | 2.7843        | 7.0021        | -1.36691        |
| -0.73686        | 2968        | 6.0647        | 3.89545        | -0.90703        | 3130        | 6.901         | 2.8854        | -0.56327        |
| -0.99796        | 2215        | 3.6117        | 6.34845        | -1.47819        | 1304        | 4.0644        | 5.722         | -1.11702        |
| -0.9916         | 4401        | 5.317         | 4.64315        | -1.08113        | 2429        | 5.4343        | 4.3521        | -0.84959        |

|          |      |        |          |          |      |        |         |          |
|----------|------|--------|----------|----------|------|--------|---------|----------|
| -0.84555 | 2747 | 3.0579 | 6.90225  | -1.60714 | 3003 | 4.329  | 5.4574  | -1.06536 |
| -0.67804 | 2854 | 9.5305 | 0.42965  | -0.10004 | 3127 | 7.4832 | 2.3032  | -0.44962 |
| -1.32247 | 2004 | 4.3413 | 5.61885  | -1.30831 | 1773 | 5.2453 | 4.5411  | -0.88649 |
| -0.59617 | 2630 | 4.2586 | 5.70155  | -1.32757 | 3840 | 3.9583 | 5.8281  | -1.13773 |
| -0.48815 | 1844 | 4.6095 | 5.35065  | -1.24586 | 2082 | 1.9693 | 7.8171  | -1.52601 |
| 0.35996  | 3728 | 13.224 | 3.26385  | 0.759965 | 3389 | 12.659 | 2.8726  | 0.560773 |
| -1.06617 | 2500 | 5.12   | 4.84015  | -1.127   | 3863 | 3.9348 | 5.8516  | -1.14232 |
| -0.21738 | 3997 | 11.058 | 1.09785  | 0.255627 | 3380 | 14.734 | 4.9476  | 0.965842 |
| 1.617396 | 2699 | 18.155 | 8.19485  | 1.908114 | 2404 | 16.681 | 6.8946  | 1.345924 |
| 2.276821 | 1524 | 12.992 | 3.03185  | 0.705945 | 1855 | 11.213 | 1.4266  | 0.278493 |
| 0.380975 | 2681 | 13.502 | 3.54185  | 0.824695 | 2504 | 10.104 | 0.3176  | 0.062    |
| 1.76491  | 2835 | 15.45  | 5.48985  | 1.278274 | 2522 | 20.381 | 10.5946 | 2.068217 |
| 0.07289  | 3518 | 9.2951 | 0.66505  | -0.15485 | 1763 | 13.33  | 3.5436  | 0.691761 |
| 0.284673 | 3478 | 7.9068 | 2.05335  | -0.47811 | 2527 | 11.476 | 1.6896  | 0.329834 |
| -0.40642 | 1254 | 6.6188 | 3.34135  | -0.77801 | 1433 | 9.9791 | 0.1927  | 0.037618 |
| 0.001296 | 2238 | 10.054 | 0.09385  | 0.021852 | 1674 | 11.47  | 1.6836  | 0.328663 |
| 0.491559 | 2579 | 8.608  | 1.35215  | -0.31484 | 1647 | 9.7146 | 0.0718  | -0.01402 |
| 1.519666 | 2102 | 20.362 | 10.40185 | 2.421999 | 1973 | 18.348 | 8.5616  | 1.671347 |
| 1.075697 | 2751 | 13.74  | 3.77985  | 0.880112 | 2973 | 19.341 | 9.5546  | 1.865194 |
| -0.41115 | 3555 | 11.449 | 1.48885  | 0.346668 | 2278 | 9.6576 | 0.1288  | -0.02514 |
| -0.39354 | 2623 | 7.663  | 2.29715  | -0.53488 | 2356 | 5.1358 | 4.6506  | -0.90786 |
| -0.63897 | 2024 | 6.0277 | 3.93245  | -0.91564 | 2177 | 6.9362 | 2.8502  | -0.5564  |
| 0.263454 | 3005 | 8.0532 | 1.90695  | -0.44402 | 2880 | 7.6736 | 2.1128  | -0.41245 |
| 0.166131 | 1663 | 6.9152 | 3.04495  | -0.709   | 4380 | 10.205 | 0.4186  | 0.081717 |
| -0.26645 | 2924 | 5.472  | 4.48815  | -1.04503 | 3554 | 5.5431 | 4.2433  | -0.82835 |
| -0.89837 | 2624 | 7.0122 | 2.94795  | -0.68641 | 4273 | 5.289  | 4.4974  | -0.87796 |
| -0.83323 | 2918 | 4.3866 | 5.57355  | -1.29776 | 4471 | 5.4574 | 4.329   | -0.84508 |
| -0.25919 | 4079 | 4.7561 | 5.20405  | -1.21173 | 5423 | 10.603 | 0.8166  | 0.159412 |
| 0.843919 | 2892 | 13.451 | 3.49085  | 0.81282  | 2292 | 12.914 | 3.1276  | 0.610552 |
| 0.559093 | 3204 | 13.639 | 3.67885  | 0.856595 | 3245 | 15.285 | 5.4986  | 1.073405 |
| -0.66705 | 3979 | 16.587 | 6.62685  | 1.543016 | 3319 | 14.221 | 4.4346  | 0.865697 |
| 0.34527  | 3402 | 14.345 | 4.38485  | 1.020982 | 3564 | 17.621 | 7.8346  | 1.529426 |
| 0.374038 | 3574 | 5.4561 | 4.50405  | -1.04874 | 2779 | 8.0964 | 1.69    | -0.32991 |
| 0.521347 | 3576 | 15.492 | 5.53185  | 1.288053 | 3278 | 12.843 | 3.0566  | 0.596692 |
| 0.365877 | 2897 | 8.0428 | 1.91735  | -0.44644 | 1946 | 9.8664 | 0.08    | 0.015617 |
| -0.68229 | 3414 | 6.7077 | 3.25245  | -0.75731 | 2282 | 9.1148 | 0.6716  | -0.13111 |
| 1.127724 | 2913 | 10.882 | 0.92185  | 0.214646 | 2986 | 9.0087 | 0.7777  | -0.15182 |
| 2.121554 | 2958 | 9.9053 | 0.05485  | -0.01277 | 2820 | 10.355 | 0.5686  | 0.110999 |
| -0.2537  | 2196 | 8.6976 | 1.26255  | -0.29398 | 2607 | 9.9731 | 0.1867  | 0.036447 |
| -0.03621 | 2892 | 15.214 | 5.25385  | 1.223323 | 2808 | 9.5442 | 0.2422  | -0.04728 |
| 0.45973  | 4446 | 8.6595 | 1.30065  | -0.30285 | 3565 | 7.7419 | 2.0445  | -0.39912 |
| -0.60647 | 2291 | 5.9363 | 4.02385  | -0.93693 | 2105 | 10.736 | 0.9496  | 0.185375 |
| 1.320533 | 1418 | 14.175 | 4.21485  | 0.981399 | 1330 | 14.662 | 4.8756  | 0.951787 |
| 0.590106 | 2165 | 10.577 | 0.61685  | 0.143629 | 2809 | 17.088 | 7.3016  | 1.425377 |
| -0.37579 | 2570 | 8.9494 | 1.01075  | -0.23535 | 3697 | 8.7098 | 1.0766  | -0.21017 |
| 0.944505 | 3616 | 11.338 | 1.37785  | 0.320823 | 4174 | 13.56  | 3.7736  | 0.736661 |
| -0.40323 | 3656 | 4.7593 | 5.20085  | -1.21098 | 3633 | 9.1935 | 0.5929  | -0.11574 |

|                 |             |               |                 |                 |             |               |                |                 |
|-----------------|-------------|---------------|-----------------|-----------------|-------------|---------------|----------------|-----------------|
| 3.450605        | 4360        | 12.477        | 2.51685         | 0.586031        | 4361        | 21.234        | 11.4476        | 2.234735        |
| 1.988935        | 2781        | 9.6728        | 0.28735         | -0.06691        | 2775        | 12.937        | 3.1506         | 0.615042        |
| 1.179956        | 2988        | 13.286        | 3.32585         | 0.774401        | 2923        | 11.221        | 1.4346         | 0.280054        |
| 1.868557        | 4166        | 13.058        | 3.09785         | 0.721313        | 3552        | 11.515        | 1.7286         | 0.337447        |
| 2.027292        | 3483        | 8.039         | 1.92115         | -0.44733        | 3256        | 10.627        | 0.8406         | 0.164097        |
| 0.233461        | 2628        | 11.377        | 1.41685         | 0.329904        | 2329        | 15.672        | 5.8856         | 1.148953        |
| 1.816937        | 3232        | 9.6844        | 0.27575         | -0.06421        | 2491        | 14.452        | 4.6656         | 0.910792        |
| 2.896052        | 2984        | 13.271        | 3.31085         | 0.770908        | 2556        | 19.914        | 10.1276        | 1.977052        |
| 2.679984        | 2546        | 16.614        | 6.65385         | 1.549303        | 1645        | 19.635        | 9.8486         | 1.922587        |
| 1.865497        | 2363        | 15.616        | 5.65585         | 1.316926        | 1757        | 19.636        | 9.8496         | 1.922783        |
| 1.27585         | 3777        | 11.226        | 1.26585         | 0.294744        | 1855        | 14.933        | 5.1466         | 1.00469         |
| 0.394237        | 3469        | 10.666        | 0.70585         | 0.164352        | 1881        | 10.579        | 0.7926         | 0.154727        |
| 0.724561        | 5180        | 16.004        | 6.04385         | 1.407269        | 2912        | 21.463        | 11.6766        | 2.279439        |
| 0.35894         | 3642        | 9.1433        | 0.81685         | -0.1902         | 3082        | 10.902        | 1.1156         | 0.217781        |
| -0.10631        | 1597        | 10.394        | 0.43385         | 0.101019        | 2675        | 9.6075        | 0.1789         | -0.03492        |
| -0.85437        | 3846        | 5.9022        | 4.05795         | -0.94487        | 2794        | 6.4424        | 3.344          | -0.6528         |
| <b>1.860804</b> | <b>4021</b> | <b>21.363</b> | <b>11.40285</b> | <b>2.655075</b> | <b>2368</b> | <b>24.367</b> | <b>14.5806</b> | <b>2.846341</b> |
| 0.545015        | 2428        | 8.8962        | 1.06395         | -0.24773        | 2084        | 15.019        | 5.2326         | 1.021478        |
| -0.42188        | 2830        | 12.226        | 2.26585         | 0.527587        | 3316        | 13.842        | 4.0556         | 0.791711        |
| -0.15975        | 1687        | 7.9431        | 2.01705         | -0.46966        | 1425        | 9.0526        | 0.7338         | -0.14325        |
| -0.29185        | 3387        | 11.81         | 1.84985         | 0.430725        | 3226        | 12.027        | 2.2406         | 0.437397        |
| -0.23377        | 2100        | 12.619        | 2.65885         | 0.619095        | 1582        | 9.9874        | 0.201          | 0.039238        |
| -1.11097        | 2501        | 18.513        | 8.55285         | 1.991472        | 3208        | 18.61         | 8.8236         | 1.722493        |
| -0.10847        | 2302        | 10.469        | 0.50885         | 0.118482        | 4134        | 11.03         | 1.2436         | 0.242768        |
| <b>0.48401</b>  | <b>2408</b> | <b>26.495</b> | <b>16.53485</b> | <b>3.850025</b> | <b>1835</b> | <b>24.196</b> | <b>14.4096</b> | <b>2.81296</b>  |
| -0.32591        | 2775        | 11.784        | 1.82385         | 0.424671        | 2933        | 8.4555        | 1.3309         | -0.25981        |
| 0.769448        | 830         | 8.7952        | 1.16495         | -0.27125        | 679         | 12.077        | 2.2906         | 0.447158        |
| 0.095904        | 3222        | 13.16         | 3.19985         | 0.745063        | 2427        | 9.4355        | 0.3509         | -0.0685         |
| -1.22664        | 2392        | 12.249        | 2.28885         | 0.532943        | 1845        | 10.515        | 0.7286         | 0.142233        |
| 0.560317        | 1904        | 9.5588        | 0.40135         | -0.09345        | 1412        | 5.0283        | 4.7581         | -0.92885        |
| 0.178577        | 1618        | 10.878        | 0.91785         | 0.213715        | 1387        | 15.141        | 5.3546         | 1.045294        |
| -0.4986         | 1806        | 10.908        | 0.94785         | 0.2207          | 2321        | 5.7303        | 4.0561         | -0.79181        |
| <b>0.34629</b>  | <b>2577</b> | <b>20.14</b>  | <b>10.17985</b> | <b>2.370308</b> | <b>2251</b> | <b>25.766</b> | <b>15.9796</b> | <b>3.119446</b> |
| -0.4115         | 2354        | 6.9244        | 3.03575         | -0.70685        | 2201        | 6.8151        | 2.9713         | -0.58004        |
| -0.59186        | 1888        | 10.169        | 0.20885         | 0.048629        | 2758        | 7.5417        | 2.2447         | -0.4382         |
| -1.04052        | 2075        | 8.241         | 1.71915         | -0.40029        | 1782        | 5.3311        | 4.4553         | -0.86974        |
| -0.74037        | 2737        | 8.1476        | 1.81255         | -0.42204        | 3555        | 6.4979        | 3.2885         | -0.64196        |
| -1.22892        | 1869        | 5.297         | 4.66315         | -1.08578        | 2858        | 2.6592        | 7.1272         | -1.39133        |
| -0.81219        | 2357        | 9.249         | 0.71115         | -0.16559        | 3194        | 6.2617        | 3.5247         | -0.68807        |
| -0.86283        | 2601        | 14.225        | 4.26485         | 0.993041        | 3968        | 8.4929        | 1.2935         | -0.25251        |
| 0.619894        | 4587        | 12.23         | 2.26985         | 0.528519        | 4669        | 19.148        | 9.3616         | 1.827518        |
| 0.731906        | 2812        | 14.047        | 4.08685         | 0.951595        | 2610        | 13.716        | 3.9296         | 0.767114        |
| 0.368121        | 2604        | 7.7573        | 2.20285         | -0.51292        | 2599        | 11.543        | 1.7566         | 0.342913        |
| -0.08413        | 2675        | 9.1589        | 0.80125         | -0.18657        | 2099        | 9.5283        | 0.2581         | -0.05038        |
| 2.013214        | 2162        | 12.165        | 2.20485         | 0.513384        | 2457        | 17.257        | 7.4706         | 1.458368        |
| 0.887581        | 2470        | 9.3927        | 0.56745         | -0.13213        | 1637        | 10.324        | 0.5376         | 0.104947        |
| 1.890592        | 2341        | 10.679        | 0.71885         | 0.167379        | 2662        | 11.946        | 2.1596         | 0.421585        |

|                 |             |              |                |                 |             |               |                |                 |
|-----------------|-------------|--------------|----------------|-----------------|-------------|---------------|----------------|-----------------|
| 0.400562        | 2627        | 12.828       | 2.86785        | 0.667759        | 2843        | 16.426        | 6.6396         | 1.296145        |
| 0.44096         | 3351        | 16.234       | 6.27385        | 1.460823        | 2830        | 16.784        | 6.9976         | 1.366031        |
| 0.4126          | 3758        | 12.241       | 2.28085        | 0.53108         | 2345        | 18.337        | 8.5506         | 1.669199        |
| 0.277124        | 2939        | 8.098        | 1.86215        | -0.43359        | 1960        | 10.816        | 1.0296         | 0.200993        |
| 0.296711        | 2807        | 11.186       | 1.22585        | 0.285431        | 3040        | 8.9803        | 0.8061         | -0.15736        |
| 0.245703        | 2282        | 11.174       | 1.21385        | 0.282637        | 1896        | 10.97         | 1.1836         | 0.231056        |
| -0.54893        | 2710        | 8.4502       | 1.50995        | -0.35158        | 2880        | 11.146        | 1.3596         | 0.265413        |
| 0.546443        | 1553        | 11.719       | 1.75885        | 0.409536        | 2227        | 7.6785        | 2.1079         | -0.41149        |
| -0.22691        | 3293        | 9.3835       | 0.57665        | -0.13427        | 3336        | 7.2542        | 2.5322         | -0.49432        |
| 0.022025        | 1700        | 6.8824       | 3.07775        | -0.71663        | 2187        | 7.4989        | 2.2875         | -0.44655        |
| 0.145932        | 2806        | 10.941       | 0.98085        | 0.228384        | 3847        | 13.725        | 3.9386         | 0.768871        |
| 0.762715        | 2814        | 15.174       | 5.21385        | 1.214009        | 3883        | 18.002        | 8.2156         | 1.603802        |
| -0.59162        | 2805        | 10.196       | 0.23585        | 0.054916        | 3804        | 5.9148        | 3.8716         | -0.75579        |
| 3.339205        | 5140        | 10.447       | 0.48685        | 0.11336         | 4523        | 19.036        | 9.2496         | 1.805654        |
| 5.085089        | 1654        | 20.738       | 10.77785       | 2.509548        | 2004        | 19.261        | 9.4746         | 1.849577        |
| 3.302275        | 1689        | 16.045       | 6.08485        | 1.416815        | 2000        | 24.9          | 15.1136        | 2.950391        |
| <b>2.078504</b> | <b>2508</b> | <b>18.74</b> | <b>8.77985</b> | <b>2.044327</b> | <b>2643</b> | <b>24.442</b> | <b>14.6556</b> | <b>2.860982</b> |
| 3.971901        | 2785        | 10.485       | 0.52485        | 0.122208        | 3929        | 15.373        | 5.5866         | 1.090584        |
| 2.194393        | 2564        | 8.2293       | 1.73085        | -0.40302        | 3637        | 11.301        | 1.5146         | 0.295672        |
| 3.06254         | 3089        | 14.471       | 4.51085        | 1.05032         | 3208        | 18.111        | 8.3246         | 1.625081        |
| 2.957465        | 2953        | 13.444       | 3.48385        | 0.81119         | 2748        | 17.504        | 7.7176         | 1.506586        |
| 8.00292         | 436         | 20.413       | 10.45285       | 2.433874        | 1467        | 15.951        | 6.1646         | 1.203418        |
| 7.058058        | 1738        | 11.738       | 1.77785        | 0.41396         | 2586        | 12.336        | 2.5496         | 0.497718        |
| 3.818063        | 1720        | 15.116       | 5.15585        | 1.200504        | 2415        | 17.101        | 7.3146         | 1.427914        |
| 2.072995        | 3494        | 14.11        | 4.14985        | 0.966264        | 4367        | 20.701        | 10.9146        | 2.130686        |
| 1.096304        | 3279        | 16.865       | 6.90485        | 1.607747        | 4120        | 16.845        | 7.0586         | 1.37794         |
| 0.657027        | 3233        | 14.785       | 4.82485        | 1.123433        | 4319        | 16.115        | 6.3286         | 1.235433        |
| 2.684473        | 2990        | 15.819       | 5.85885        | 1.364193        | 4210        | 14.299        | 4.5126         | 0.880924        |
| 4.653769        | 347         | 31.124       | 21.16385       | 4.927856        | 786         | 17.43         | 7.6436         | 1.49214         |
| 0.90778         | 2531        | 14.5         | 4.53985        | 1.057073        | 4955        | 17.175        | 7.3886         | 1.44236         |
| 0.678246        | 1780        | 13.539       | 3.57885        | 0.83331         | 2677        | 13.821        | 4.0346         | 0.787612        |
| 0.092232        | 4513        | 12.63        | 2.66985        | 0.621656        | 6239        | 18.368        | 8.5816         | 1.675251        |
| 0.541342        | 1292        | 16.486       | 6.52585        | 1.519499        | 2891        | 9.8582        | 0.0718         | 0.014016        |
| 3.214746        | 4320        | 15.046       | 5.08585        | 1.184205        | 3453        | 16.594        | 6.8076         | 1.328941        |
| 3.863153        | 4100        | 20.488       | 10.52785       | 2.451337        | 4989        | 18.841        | 9.0546         | 1.767587        |
| 2.513496        | 4372        | 14.433       | 4.47285        | 1.041472        | 3991        | 21.373        | 11.5866        | 2.26187         |
| 4.099012        | 3352        | 21.689       | 11.72885       | 2.730981        | 4053        | 25.043        | 15.2566        | 2.978306        |
| 3.043973        | 3527        | 11.483       | 1.52285        | 0.354585        | 3072        | 17.578        | 7.7916         | 1.521032        |
| 2.059325        | 5036        | 17.752       | 7.79185        | 1.814278        | 3153        | 22.518        | 12.7316        | 2.48539         |
| 2.216428        | 3550        | 16.366       | 6.40585        | 1.491558        | 2461        | 21.658        | 11.8716        | 2.317506        |
| 1.774091        | 2944        | 16.882       | 6.92185        | 1.611705        | 3415        | 23.602        | 13.8156        | 2.697002        |
| 2.985825        | 4148        | 16.321       | 6.36085        | 1.48108         | 3091        | 22.161        | 12.3746        | 2.415699        |
| 2.16338         | 3699        | 13.896       | 3.93585        | 0.916435        | 3287        | 27.168        | 17.3816        | 3.393137        |
| 2.352312        | 5069        | 17.775       | 7.81485        | 1.819634        | 2547        | 20.141        | 10.3546        | 2.021366        |
| 1.085286        | 4452        | 18.104       | 8.14385        | 1.896239        | 2779        | 20.619        | 10.8326        | 2.114678        |
| 1.143027        | 3198        | 18.699       | 8.73885        | 2.034781        | 2713        | 16.292        | 6.5056         | 1.269986        |
| 0.425657        | 2753        | 13.513       | 3.55285        | 0.827257        | 3080        | 17.435        | 7.6486         | 1.493116        |

|          |      |        |         |          |      |        |        |          |
|----------|------|--------|---------|----------|------|--------|--------|----------|
| 0.244683 | 2251 | 13.638 | 3.67785 | 0.856362 | 3893 | 12.15  | 2.3636 | 0.461408 |
| 0.687836 | 2860 | 8.4266 | 1.53355 | -0.35708 | 3209 | 10.751 | 0.9646 | 0.188304 |
| 0.401378 | 4057 | 13.187 | 3.22685 | 0.75135  | 4019 | 11.52  | 1.7336 | 0.338423 |
| 0.569499 | 2817 | 16.152 | 6.19185 | 1.441729 | 2256 | 16.401 | 6.6146 | 1.291264 |
| 0.145728 | 2377 | 17.543 | 7.58285 | 1.765614 | 3308 | 14.964 | 5.1776 | 1.010741 |
| -0.35323 | 2962 | 13.201 | 3.24085 | 0.754609 | 3676 | 19.505 | 9.7186 | 1.89721  |
| -1.11024 | 3608 | 6.2639 | 3.69625 | -0.86065 | 3730 | 5.1475 | 4.6389 | -0.90558 |
| -0.71481 | 2045 | 8.1663 | 1.79385 | -0.41769 | 2829 | 6.6808 | 3.1056 | -0.60626 |
| -0.98872 | 5046 | 11.732 | 1.77185 | 0.412563 | 5197 | 12.661 | 2.8746 | 0.561163 |
| -1.03716 | 2117 | 5.5267 | 4.43345 | -1.0323  | 2852 | 5.54   | 4.2464 | -0.82896 |
| -1.01804 | 2509 | 3.5074 | 6.45275 | -1.50248 | 2500 | 4.76   | 5.0264 | -0.98123 |
| -0.0398  | 3919 | 6.124  | 3.83615 | -0.89322 | 2929 | 7.238  | 2.5484 | -0.49748 |
| -1.64925 | 1866 | 3.4834 | 6.47675 | -1.50807 | 1948 | 4.6201 | 5.1663 | -1.00854 |
| -1.08794 | 1206 | 7.131  | 2.82915 | -0.65875 | 1313 | 1.904  | 7.8824 | -1.53876 |
| -0.33036 | 3054 | 5.1408 | 4.81935 | -1.12215 | 3485 | 4.1894 | 5.597  | -1.09261 |
| -0.26598 | 2277 | 10.365 | 0.40485 | 0.094267 | 2903 | 8.8185 | 0.9679 | -0.18895 |
| -0.27745 | 2840 | 5.9155 | 4.04465 | -0.94177 | 3844 | 8.897  | 0.8894 | -0.17362 |
| -1.38348 | 3100 | 8.3548 | 1.60535 | -0.37379 | 3071 | 5.8938 | 3.8926 | -0.75989 |
| -1.24904 | 3327 | 10.249 | 0.28885 | 0.067257 | 3107 | 6.1796 | 3.6068 | -0.7041  |
| -0.86891 | 1657 | 3.9228 | 6.03735 | -1.40576 | 2872 | 3.8997 | 5.8867 | -1.14917 |
| -1.05811 | 2271 | 7.3096 | 2.65055 | -0.61716 | 4091 | 3.0066 | 6.7798 | -1.32351 |
| -1.16824 | 3297 | 13.436 | 3.47585 | 0.809328 | 4350 | 5.7241 | 4.0623 | -0.79302 |
| -1.0635  | 2961 | 8.4769 | 1.48325 | -0.34536 | 3578 | 5.6177 | 4.1687 | -0.81379 |
| -0.9764  | 4070 | 10.983 | 1.02285 | 0.238164 | 5075 | 6.5419 | 3.2445 | -0.63337 |
| -0.80632 | 3699 | 9.7864 | 0.17375 | -0.04046 | 4081 | 5.7829 | 4.0035 | -0.78154 |
| -1.1275  | 2038 | 4.4161 | 5.54405 | -1.29089 | 2713 | 5.4184 | 4.368  | -0.8527  |
| 0.865138 | 1341 | 12.528 | 2.56785 | 0.597906 | 2120 | 12.736 | 2.9496 | 0.575804 |
| 0.499516 | 2316 | 11.572 | 1.61185 | 0.375308 | 3483 | 14.097 | 4.3106 | 0.841491 |
| 0.849632 | 4401 | 10.816 | 0.85585 | 0.199279 | 4434 | 10.487 | 0.7006 | 0.136767 |
| 0.840042 | 1758 | 12.173 | 2.21285 | 0.515247 | 3661 | 13.494 | 3.7076 | 0.723776 |
| -0.22871 | 2320 | 5.9914 | 3.96875 | -0.9241  | 2845 | 8.3656 | 1.4208 | -0.27736 |
| 1.032646 | 1894 | 11.827 | 1.86685 | 0.434683 | 2927 | 12.607 | 2.8206 | 0.550621 |
| -0.60508 | 2034 | 8.6529 | 1.30725 | -0.30438 | 2503 | 4.8342 | 4.9522 | -0.96674 |
| -0.18566 | 2737 | 10.047 | 0.08685 | 0.020222 | 4310 | 6.5893 | 3.1971 | -0.62412 |
| -0.00066 | 2975 | 6.7563 | 3.20385 | -0.74599 | 2836 | 8.3921 | 1.3943 | -0.27219 |
| -0.40301 | 2804 | 8.7375 | 1.22265 | -0.28469 | 2936 | 8.9237 | 0.8627 | -0.16841 |
| -0.4671  | 2559 | 4.025  | 5.93515 | -1.38196 | 2264 | 4.5936 | 5.1928 | -1.01371 |
| -0.60906 | 915  | 12.022 | 2.06185 | 0.480087 | 1693 | 9.0372 | 0.7492 | -0.14625 |
| -0.38622 | 2526 | 8.0364 | 1.92375 | -0.44793 | 3842 | 7.9906 | 1.7958 | -0.35057 |
| -0.94746 | 3461 | 7.6856 | 2.27455 | -0.52961 | 4798 | 4.9812 | 4.8052 | -0.93804 |
| -0.89189 | 2227 | 3.9964 | 5.96375 | -1.38862 | 3363 | 3.3601 | 6.4263 | -1.25451 |
| -0.80952 | 2739 | 6.4257 | 3.53445 | -0.82297 | 5146 | 5.752  | 4.0344 | -0.78757 |
| -1.11048 | 2751 | 5.2708 | 4.68935 | -1.09188 | 5229 | 3.4615 | 6.3249 | -1.23471 |
| -1.41194 | 3784 | 9.3816 | 0.57855 | -0.13471 | 4373 | 5.4196 | 4.3668 | -0.85246 |
| -1.08618 | 2763 | 5.3565 | 4.60365 | -1.07193 | 4509 | 5.1674 | 4.619  | -0.90169 |
| -1.28779 | 2808 | 8.084  | 1.87615 | -0.43685 | 2790 | 3.2258 | 6.5606 | -1.28072 |
| 2.288247 | 2909 | 8.2159 | 1.74425 | -0.40614 | 2135 | 10.351 | 0.5646 | 0.110218 |

|          |      |         |          |          |      |        |          |          |
|----------|------|---------|----------|----------|------|--------|----------|----------|
| 2.717321 | 4752 | 17.34   | 7.37985  | 1.718347 | 4290 | 18.065 | 8.2786   | 1.616101 |
| -0.66862 | 3031 | 9.1719  | 0.78825  | -0.18354 | 3961 | 8.3565 | 1.4299   | -0.27914 |
| -0.03351 | 2884 | 8.3564  | 1.60375  | -0.37342 | 3060 | 7.2549 | 2.5315   | -0.49418 |
| -0.191   | 3915 | 8.2503  | 1.70985  | -0.39813 | 3635 | 12.985 | 3.1986   | 0.624412 |
| -0.62569 | 5396 | 11.675  | 1.71485  | 0.399291 | 3935 | 9.2249 | 0.5615   | -0.10961 |
| -0.23413 | 3384 | 15.396  | 5.43585  | 1.2657   | 3203 | 13.362 | 3.5756   | 0.698008 |
| 1.527419 | 2690 | 7.1004  | 2.85975  | -0.66587 | 1752 | 7.3059 | 2.4805   | -0.48423 |
| -0.09539 | 2567 | 13.167  | 3.20685  | 0.746693 | 4120 | 11.335 | 1.5486   | 0.302309 |
| 0.280388 | 3541 | 9.1217  | 0.83845  | -0.19523 | 2757 | 7.9434 | 1.843    | -0.35978 |
| 1.303394 | 2164 | 12.338  | 2.37785  | 0.553666 | 2772 | 13.672 | 3.8856   | 0.758525 |
| 1.267077 | 2891 | 10.239  | 0.27885  | 0.064928 | 3041 | 8.1552 | 1.6312   | -0.31843 |
| -0.77467 | 2616 | 12.844  | 2.88385  | 0.671485 | 3626 | 8.0805 | 1.7059   | -0.33302 |
| -0.78128 | 2755 | 5.5172  | 4.44295  | -1.03451 | 2792 | 5.9814 | 3.805    | -0.74279 |
| -0.1554  | 1939 | 22.228  | 12.26785 | 2.856484 | 2773 | 11.143 | 1.3566   | 0.264828 |
| -1.48774 | 2181 | 7.8863  | 2.07385  | -0.48288 | 2783 | 5.2821 | 4.5043   | -0.8793  |
| -1.41475 | 3021 | 6.852   | 3.10815  | -0.72371 | 5725 | 4.559  | 5.2274   | -1.02046 |
| -1.30403 | 3071 | 18.333  | 8.37285  | 1.94956  | 4566 | 12.9   | 3.1136   | 0.607819 |
| -1.05076 | 2724 | 8.7372  | 1.22295  | -0.28476 | 2626 | 3.9223 | 5.8641   | -1.14476 |
| -1.0079  | 2198 | 7.5978  | 2.36235  | -0.55006 | 4054 | 3.9221 | 5.8643   | -1.1448  |
| -0.49874 | 4008 | 9.3313  | 0.62885  | -0.14642 | 2968 | 10.647 | 0.8606   | 0.168001 |
| -0.115   | 2014 | 14.3    | 4.33985  | 1.010504 | 2456 | 12.622 | 2.8356   | 0.55355  |
| -0.42056 | 1894 | 8.3421  | 1.61805  | -0.37675 | 1432 | 5.4469 | 4.3395   | -0.84713 |
| -1.09569 | 1897 | 11.123  | 1.16285  | 0.270762 | 2096 | 9.1603 | 0.6261   | -0.12222 |
| 1.089571 | 2598 | 20.593  | 10.63285 | 2.475785 | 2608 | 12.577 | 2.7906   | 0.544765 |
| 0.890438 | 2449 | 12.332  | 2.37185  | 0.552269 | 1718 | 10.594 | 0.8076   | 0.157655 |
| 0.253456 | 2426 | 9.7692  | 0.19095  | -0.04446 | 1861 | 9.1349 | 0.6515   | -0.12718 |
| -0.42441 | 2165 | 13.58   | 3.61985  | 0.842857 | 2172 | 16.667 | 6.8806   | 1.343191 |
| 0.290386 | 2404 | 13.062  | 3.10185  | 0.722244 | 2018 | 13.28  | 3.4936   | 0.682001 |
| -0.1038  | 2211 | 12.935  | 2.97485  | 0.692673 | 3313 | 17.386 | 7.5996   | 1.48355  |
| 1.087122 | 486  | 9.6708  | 0.28935  | -0.06737 | 307  | 9.4463 | 0.3401   | -0.06639 |
| 0.040673 | 1696 | 10.672  | 0.71185  | 0.165749 | 1592 | 6.093  | 3.6934   | -0.721   |
| 0.353635 | 605  | 14.215  | 4.25485  | 0.990712 | 643  | 13.841 | 4.0546   | 0.791516 |
| -0.53169 | 2428 | 15.239  | 5.27885  | 1.229144 | 3007 | 7.416  | 2.3704   | -0.46274 |
| -0.93012 | 1561 | 8.5202  | 1.43995  | -0.33528 | 2277 | 8.0369 | 1.7495   | -0.34153 |
| -0.85379 | 2391 | 6.399   | 3.56115  | -0.82919 | 2559 | 7.6592 | 2.1272   | -0.41526 |
| -0.13506 | 1541 | 8.6308  | 1.32935  | -0.30953 | 2732 | 7.1742 | 2.6122   | -0.50994 |
| -1.11869 | 2317 | 10.703  | 0.74285  | 0.172967 | 4065 | 8.0197 | 1.7667   | -0.34489 |
| -1.26559 | 998  | 7.7154  | 2.24475  | -0.52267 | 2357 | 3.9881 | 5.7983   | -1.13191 |
| -0.40729 | 1572 | 10.433  | 0.47285  | 0.1101   | 2324 | 7.5301 | 2.2563   | -0.44046 |
|          |      | 9.96015 | 2.90185  |          |      | 9.7864 | 3.4612   |          |
|          |      |         | 8.70555  |          |      |        | 10.3836  |          |
|          |      |         | 4.294738 |          |      |        | 5.122576 |          |
|          | 2080 | 31.827  | 2622     | 30.816   | 1501 | 36.775 |          |          |
|          | 4188 | 42.479  | 3097     | 31.611   | 4042 | 39.634 |          |          |
|          | 1753 | 31.375  | 1806     | 38.594   | 3218 | 28.931 |          |          |
|          | 3580 | 38.939  | 3023     | 36.553   | 3927 | 39.7   |          |          |

|           |          |          |          |          |          |          |
|-----------|----------|----------|----------|----------|----------|----------|
| mn        | 2900.25  | 36.155   | 2637     | 34.3935  | 3172     | 36.26    |
| sd        | 1170.378 | 5.456605 | 591.9972 | 3.779262 | 1172.075 | 5.072703 |
|           | 812      | 7.6355   | 1247     | 6.8164   | 1516     | 9.3668   |
|           | 1629     | 4.911    | 766      | 4.6997   | 1767     | 8.206    |
|           | 350      | 5.1429   | 566      | 6.8905   | 1476     | 4.1328   |
|           | 1940     | 4.5361   | 823      | 6.5614   | 1630     | 6.0123   |
| mn        | 1182.75  | 5.556375 | 850.5    | 6.242    | 1597.25  | 6.929475 |
| sd        | 731.0939 | 1.40845  | 286.3849 | 1.037817 | 130.6277 | 2.326132 |
| 3posSD    |          | 16.36982 |          | 11.33778 |          | 15.21811 |
| 3negSD    |          | 4.225349 |          | 3.113451 |          | 6.978396 |
| Sum3SD    |          | 20.59516 |          | 14.45124 |          | 22.1965  |
| MnDiff    |          | 30.59863 |          | 28.1515  |          | 29.33053 |
| SumovrMn  |          | 0.673075 |          | 0.513338 |          | 0.756771 |
| 1minus    |          | 0.326925 |          | 0.486662 |          | 0.243229 |
|           | 2190     | 29.635   | 5851     | 18.424   | 1385     | 31.625   |
|           | 5358     | 26.652   | 6297     | 23.281   | 6846     | 25.212   |
| PLK1 SMAR | 145      | 26.897   | 340      | 16.765   | 190      | 22.105   |
| PLK1 SMAR | 115      | 42.609   | 161      | 35.404   | 170      | 38.824   |
|           | 677      | 9.3058   | 1996     | 12.275   | 2404     | 15.017   |
|           | 3037     | 13.566   | 3267     | 15.549   | 3693     | 12.591   |



Y

Y





x art a

Y

Y

Y

x toxic a,b  
x toxic a,b  
Y

x toxic a,b,c

x toxic a

x toxic a,b,c

X debris a,b  
X debris a,c  
X debris a,c

X debris a,c  
X debris a,c

X debris a,c  
X debris a,c

|                  |                            |                      | cell ct     | % inf         | AD           |
|------------------|----------------------------|----------------------|-------------|---------------|--------------|
| 50064 A02        | M-014232- stromal an       | 64940 FLJ13195       | 2636        | 3.1108        | 7.4582       |
| 50064 A04        | M-013550- mitochond        | 64928 MRPL14         | 2415        | 4.3478        | 6.2212       |
| 50064 A05        | M-014044- interferon       | 64163 IFRG15         | 2025        | 4.7407        | 5.8283       |
| 50064 A06        | M-016339- tetratricop      | 64927 TTC23          | 1729        | 10.642        | 0.073        |
| 50064 A07        | M-005934- leukocyte-c      | 64167 LRAP           | 2807        | 7.2675        | 3.3015       |
| 50064 A08        | M-031241- hypothetic       | 64926 FLJ21438       | 3356        | 7.36          | 3.209        |
| 50064 A09        | M-018118- EF-hand ca       | 64168 EFCBP1         | 3465        | 15.267        | 4.698        |
| 50064 A10        | M-019360- coiled-coil      | 64925 CCDC71         | 2284        | 5.6042        | 4.9648       |
| 50064 A11        | M-004400- caspase rec      | 64170 CARD9          | 1100        | 9.1818        | 1.3872       |
| 50064 A12        | M-007526- solute carri     | 64924 SLC30A5        | 2075        | 9.494         | 1.075        |
| 50064 A13        | M-005982- O-sialoglyc      | 64172 OSGEPL1        | 1551        | 9.6712        | 0.8978       |
| 50064 A14        | M-014231- leucine rich     | 64922 LRRC19         | 2805        | 10.873        | 0.304        |
| 50064 A15        | M-014045- spermatog        | 64173 SPATA1         | 2758        | 11.313        | 0.744        |
| 50064 A16        | M-016926- CAS1 doma        | 64921 CASD1          | 2881        | 11.211        | 0.642        |
| 50064 A17        | M-004271- leucine pro      | 64175 LEPRE1         | 1500        | 5.2           | 5.369        |
| 50064 A18        | M-005082- B-cell CLL/I     | 64919 BCL11B         | 1105        | 13.846        | 3.277        |
| 50064 A19        | M-013033- family with      | 64184 FAM12B         | 1407        | 11.158        | 0.589        |
| 50064 A20        | M-015496- RAN bindin       | 64901 RANBP17        | 1626        | 15.252        | 4.683        |
| 50064 A21        | M-007044- chromosom        | 64207 C14orf4        | 1666        | 6.0024        | 4.5666       |
| 50064 A23        | M-017314- popeye doi       | 64208 POPDC3         | 1982        | 11.1          | 0.531        |
| 50064 B02        | M-026308- F-box and l      | 79176 FBXL15         | 3116        | 17.683        | 7.114        |
| 50064 B04        | M-012894- zinc finger      | 79027 ZNF655         | 1630        | 14.601        | 4.032        |
| 50064 B05        | M-014234- 5'-nucleoti      | 64943 NT5DC2         | 2603        | 11.602        | 1.033        |
| 50064 B06        | M-014325- chromosom        | 79144 C20orf149      | 2817        | 8.0582        | 2.5108       |
| 50064 B07        | M-013546- mitochond        | 64949 MRPS26         | 3099        | 8.648         | 1.921        |
| <b>50064 B08</b> | <b>M-014268- chromosom</b> | <b>78998 C8orf51</b> | <b>3237</b> | <b>17.084</b> | <b>6.515</b> |
| 50064 B09        | M-013534- mitochond        | 64951 MRPS24         | 4436        | 6.3345        | 4.2345       |
| 50064 B10        | M-012886- Ly6/neurot       | 66004 LYNX1          | 2564        | 9.2044        | 1.3646       |
| 50064 B11        | M-013609- mitochond        | 64960 MRPS15         | 2911        | 4.878         | 5.691        |
| 50064 B12        | M-014313- chromosom        | 79098 C1orf116       | 2757        | 10.301        | 0.268        |
| 50064 B13        | M-019184- mitochond        | 64965 MRPS9          | 1974        | 7.3961        | 3.1729       |
| 50064 B14        | M-013739- chromosom        | 64758 C14orf136      | 3066        | 6.1644        | 4.4046       |
| 50064 B15        | M-019243- mitochond        | 64968 MRPS6          | 2901        | 6.8252        | 3.7438       |
| 50064 B16        | M-014339- centromer        | 79172 CENPO          | 1837        | 12.357        | 1.788        |
| 50064 B17        | M-019247- mitochond        | 64969 MRPS5          | 2869        | 10.561        | 0.008        |
| 50064 B18        | M-015657- RNA bindin       | 79171 RBM42          | 2320        | 7.1121        | 3.4569       |
| 50064 B19        | M-013572- mitochond        | 64975 MRPL41         | 4139        | 9.8575        | 0.7115       |
| 50064 B20        | M-014338- ATPase fan       | 79170 ATAD4          | 3889        | 10.44         | 0.129        |
| 50064 B21        | M-017608- mitochond        | 64976 MRPL40         | 4558        | 4.8267        | 5.7423       |
| 50064 B23        | M-013573- mitochond        | 64978 MRPL38         | 2044        | 4.4521        | 6.1169       |
| 50064 C02        | M-014230- chromosom        | 64897 C12orf43       | 2864        | 8.0656        | 2.5034       |
| 50064 C04        | M-009854- poly(A) pol      | 64895 PAPOLG         | 2911        | 9.9279        | 0.6411       |
| 50064 C05        | M-017823- MMS19-lik        | 64210 MMS19L         | 3434        | 11.386        | 0.817        |
| 50064 C06        | M-012854- protocadhe       | 64881 PCDH20         | 4416        | 12.115        | 1.546        |
| 50064 C07        | M-004887- DnaJ (Hsp4       | 64215 DNAJC1         | 2072        | 4.8263        | 5.7427       |
| 50064 C08        | M-010732- CUB domai        | 64866 CDCP1          | 2062        | 13.046        | 2.477        |

|           |                        |                |      |        |        |
|-----------|------------------------|----------------|------|--------|--------|
| 50064 C09 | M-015686- sema doma    | 64218 SEMA4A   | 3202 | 4.1849 | 6.3841 |
| 50064 C10 | M-014227- regulatory   | 64864 RFXDC2   | 4042 | 11.034 | 0.465  |
| 50064 C11 | M-007045- praja 1      | 64219 PJA1     | 2675 | 6.5421 | 4.0269 |
| 50064 C12 | M-014226- methyltran   | 64863 METTL4   | 3267 | 11.448 | 0.879  |
| 50064 C13 | M-016467- stimulated   | 64220 STRA6    | 2273 | 7.1271 | 3.4419 |
| 50064 C14 | M-014225- armadillo r  | 64860 ARMCX5   | 2104 | 16.968 | 6.399  |
| 50064 C15 | M-026504- roundabou    | 64221 ROBO3    | 2721 | 7.24   | 3.329  |
| 50064 C16 | M-014224- oligonuclec  | 64859 OBFC2A   | 4165 | 5.9064 | 4.6626 |
| 50064 C17 | M-017824- torsin fami  | 64222 TOR3A    | 1760 | 3.9205 | 6.6485 |
| 50064 C18 | M-016331- von Willebl  | 64856 VWA1     | 1656 | 6.7029 | 3.8661 |
| 50064 C19 | M-016093- G protein b  | 64223 GBL      | 1873 | 9.9306 | 0.6384 |
| 50064 C20 | M-014222- chromoson    | 64853 C1orf80  | 3303 | 12.625 | 2.056  |
| 50064 C21 | M-018276- HERPUD fa    | 64224 HERPUD2  | 3545 | 7.8984 | 2.6706 |
| 50064 C23 | M-014047- ADP-ribosy   | 64225 ARL6IP2  | 5349 | 7.5154 | 3.0536 |
| 50064 D02 | M-014336- chromoson    | 79169 C1orf35  | 3810 | 8.3202 | 2.2488 |
| 50064 D04 | M-004156- chromoson    | 79161 C7orf23  | 2368 | 13.64  | 3.071  |
| 50064 D05 | M-013574- mitochond    | 64979 MRPL36   | 2031 | 7.7794 | 2.7896 |
| 50064 D06 | M-014330- nucleolar p  | 79159 NOL12    | 2727 | 10.341 | 0.228  |
| 50064 D07 | M-012885- mitochond    | 64981 MRPL34   | 2317 | 6.9486 | 3.6204 |
| 50064 D08 | M-031144- N-acetylglu  | 79158 GNPTAB   | 3106 | 10.753 | 0.184  |
| 50064 D09 | M-013123- mitochond    | 65003 MRPL11   | 3873 | 12.058 | 1.489  |
| 50064 D10 | M-014329- major facili | 79157 MFSD11   | 3666 | 7.5832 | 2.9858 |
| 50064 D11 | M-013498- mitochond    | 65005 MRPL9    | 2747 | 11.467 | 0.898  |
| 50064 D12 | M-018423- pleckstrin f | 79156 PLEKHF1  | 3283 | 7.5236 | 3.0454 |
| 50064 D13 | M-007494- solute carri | 65010 SLC26A6  | 2625 | 8.0762 | 2.4928 |
| 50064 D14 | M-014328- TNFAIP3 in   | 79155 TNIP2    | 3309 | 8.7035 | 1.8655 |
| 50064 D15 | M-007489- solute carri | 65012 SLC26A10 | 4139 | 8.6494 | 1.9196 |
| 50064 D16 | M-003997- glyceropho   | 79153 GDPD3    | 3529 | 12.978 | 2.409  |
| 50064 D17 | M-014235- receptor ac  | 65055 REEP1    | 3296 | 13.926 | 3.357  |
| 50064 D18 | M-009624- fatty acid 2 | 79152 FA2H     | 4717 | 7.6956 | 2.8734 |
| 50064 D19 | M-014236- GC-rich prc  | 65056 GPBP1    | 5450 | 8.3486 | 2.2204 |
| 50064 D20 | M-014327- zinc finger  | 79149 ZSCAN5   | 3916 | 10.521 | 0.048  |
| 50064 D21 | M-031856- neurobeacl   | 65065 NBEAL1   | 4167 | 5.4476 | 5.1214 |
| 50064 D23 | M-012858- mitochond    | 65080 MRPL44   | 2531 | 5.1758 | 5.3932 |
| 50064 E02 | M-014221- terminal ur  | 64852 TUT1     | 3214 | 14.499 | 3.93   |
| 50064 E04 | M-007393- solute carri | 64849 SLC13A3  | 3800 | 15.474 | 4.905  |
| 50064 E05 | M-017543- membrane     | 64232 MS4A5    | 2290 | 19.913 | 9.344  |
| 50064 E06 | M-014220- YTH domai    | 64848 YTHDC2   | 2415 | 14.534 | 3.965  |
| 50064 E07 | M-010731- PDZ and LII  | 64236 PDLIM2   | 3616 | 10.537 | 0.032  |
| 50064 E08 | M-018059- spermatog    | 64847 SPATA20  | 2228 | 11.939 | 1.37   |
| 50064 E09 | M-015651- rhomboid f   | 64285 RHBDF1   | 2608 | 10.084 | 0.485  |
| 50064 E10 | M-007055- membrane     | 64844 MARCH7   | 3759 | 8.6725 | 1.8965 |
| 50064 E11 | M-007046- zinc finger  | 64288 ZNF323   | 2833 | 8.4716 | 2.0974 |
| 50064 E12 | M-005239- glucosamin   | 64841 GNPAT1   | 1590 | 7.1698 | 3.3992 |
| 50064 E13 | M-018198- nucleolar c  | 64318 NOC3L    | 1750 | 10.629 | 0.06   |
| 50064 E14 | M-024385- F-box and I  | 64839 FBXL17   | 1467 | 9.5433 | 1.0257 |
| 50064 E15 | M-014091- fibrosin     | 64319 FBRS     | 1485 | 6.936  | 3.633  |

|           |                        |                |      |        |        |
|-----------|------------------------|----------------|------|--------|--------|
| 50064 E16 | M-014219- fibronectin  | 64838 FNDC4    | 3303 | 6.267  | 4.302  |
| 50064 E17 | M-007047- ring finger  | 64320 RNF25    | 3523 | 8.1749 | 2.3941 |
| 50064 E18 | M-009355- elongation   | 64834 ELOVL1   | 3826 | 6.5342 | 4.0348 |
| 50064 E19 | M-013028- SRY (sex de  | 64321 SOX17    | 3299 | 12.367 | 1.798  |
| 50064 E20 | M-009273- cytochrom    | 64816 CYP3A43  | 4009 | 16.064 | 5.495  |
| 50064 E21 | M-007049- ring finger  | 64326 RFWD2    | 4595 | 9.2057 | 1.3633 |
| 50064 E23 | M-027196- exportin 4   | 64328 XPO4     | 1770 | 6.1017 | 4.4673 |
| 50064 F02 | M-014326- coiled-coil- | 79145 CHCHD7   | 4141 | 9.901  | 0.668  |
| 50064 F04 | M-014324- PHD finger   | 79142 PHF23    | 1824 | 8.0592 | 2.5098 |
| 50064 F05 | M-013330- vacuolar pr  | 65082 VPS33A   | 2410 | 12.531 | 1.962  |
| 50064 F06 | M-014323- coiled-coil  | 79140 CCDC28B  | 2247 | 13.218 | 2.649  |
| 50064 F07 | M-017285- nucleolar p  | 65083 NOL6     | 2398 | 6.9224 | 3.6466 |
| 50064 F08 | M-010733- Der1-like d  | 79139 DERL1    | 2991 | 12.471 | 1.902  |
| 50064 F09 | M-018130- transmemk    | 65084 TMEM135  | 3262 | 9.3807 | 1.1883 |
| 50064 F10 | M-018422- family with  | 79137 FAM134A  | 2977 | 15.888 | 5.319  |
| 50064 F11 | M-014238- jumonji do   | 65094 JMJD4    | 2485 | 16.821 | 6.252  |
| 50064 F12 | M-014319- lymphocyte   | 79136 LY6G6E   | 2349 | 8.3865 | 2.1825 |
| 50064 F13 | M-012870- hypothetic   | 65095 FLJ12949 | 4393 | 8.7412 | 1.8278 |
| 50064 F14 | M-014318- apolipopro   | 79135 APOO     | 4272 | 8.427  | 2.142  |
| 50064 F15 | M-012871- UPF3 regul   | 65109 UPF3B    | 2684 | 10.32  | 0.249  |
| 50064 F16 | M-014317- chromoson    | 79133 C20orf7  | 3484 | 11.079 | 0.51   |
| 50064 F17 | M-012872- UPF3 regul   | 65110 UPF3A    | 3507 | 5.6173 | 4.9517 |
| 50064 F18 | M-007060- ring finger  | 79102 RNF26    | 4322 | 10.689 | 0.12   |
| 50064 F19 | M-016134- arginine/se  | 65117 RSRC2    | 5235 | 14.785 | 4.216  |
| 50064 F20 | M-014314- Josephin d   | 79101 JOSD3    | 4861 | 15.923 | 5.354  |
| 50064 F21 | M-014239- PRAME fan    | 65121 PRAMEF1  | 4155 | 6.3779 | 4.1911 |
| 50064 F23 | M-014240- PRAME fan    | 65122 PRAMEF2  | 4442 | 10.536 | 0.033  |
| 50064 G02 | M-007941- interleukin  | 64806 IL25     | 3398 | 11.654 | 1.085  |
| 50064 G04 | M-008951- nicotinami   | 64802 NMNAT1   | 2505 | 14.251 | 3.682  |
| 50064 G05 | M-013497- nuclear fac  | 64332 NFKBIZ   | 3425 | 9.3139 | 1.2551 |
| 50064 G06 | M-014217- ARV1 hom     | 64801 ARV1     | 3371 | 11.391 | 0.822  |
| 50064 G07 | M-010047- Rho GTPas    | 64333 ARHGAP9  | 1891 | 6.8747 | 3.6943 |
| 50064 G08 | M-014216- CAP-bindin   | 64800 FLJ23588 | 2993 | 6.5486 | 4.0204 |
| 50064 G09 | M-013029- HCLS1 bind   | 64342 HS1BP3   | 2023 | 6.7227 | 3.8463 |
| 50064 G10 | M-014215- DEP domai    | 64798 DEPDC6   | 4037 | 12.336 | 1.767  |
| 50064 G11 | M-014092- 5-azacytidi  | 64343 AZI2     | 3338 | 15.368 | 4.799  |
| 50064 G12 | M-015437- required fo  | 64795 RMND5A   | 2092 | 8.0306 | 2.5384 |
| 50064 G13 | M-017341- nucleoredc   | 64359 NXN      | 2617 | 16.049 | 5.48   |
| 50064 G14 | M-012931- DEAD (Asp-   | 64794 DDX31    | 3536 | 14.593 | 4.024  |
| 50064 G15 | M-018813- SIL1 homol   | 64374 SIL1     | 3065 | 10.669 | 0.1    |
| 50064 G16 | M-014214- coiled-coil  | 64793 CCDC21   | 3172 | 11.885 | 1.316  |
| 50064 G17 | M-007050- IKAROS fan   | 64375 IKZF4    | 1827 | 6.3492 | 4.2198 |
| 50064 G18 | M-014213- RAB, memk    | 64792 RABL5    | 3384 | 12.264 | 1.695  |
| 50064 G19 | M-007051- IKAROS fan   | 64376 IKZF5    | 3880 | 9.768  | 0.801  |
| 50064 G20 | M-014212- chromoson    | 64789 C1orf176 | 3385 | 7.5037 | 3.0653 |
| 50064 G21 | M-010067- carbohydra   | 64377 CHST8    | 4330 | 7.1824 | 3.3866 |
| 50064 G23 | M-018120- gremlin 2, c | 64388 GREM2    | 4997 | 4.0024 | 6.5666 |



|                  |                              |                     |             |               |               |
|------------------|------------------------------|---------------------|-------------|---------------|---------------|
| 50064 H02        | M-015259- hypothetic         | 79100 MGC4473       | 3042        | 9.8291        | 0.7399        |
| 50064 H04        | M-014313- chromosom          | 79098 C1orf116      | 2635        | 20.569        | 10            |
| 50064 H05        | M-018360- integrator         | 65123 INTS3         | 3151        | 13.678        | 3.109         |
| 50064 H06        | M-007059- tripartite r       | 79097 TRIM48        | 3419        | 17.227        | 6.658         |
| 50064 H07        | M-014241- ankyrin rep        | 65124 ANKRD57       | 1959        | 4.9515        | 5.6175        |
| 50064 H08        | M-014312- chromosom          | 79096 C11orf49      | 2102        | 6.6127        | 3.9563        |
| 50064 H09        | M-007056- zinc finger        | 65243 ZNF643        | 2086        | 9.2522        | 1.3168        |
| 50064 H10        | M-014311- chromosom          | 79095 C9orf16       | 3031        | 8.677         | 1.892         |
| <b>50064 H11</b> | <b>M-014242- spermatog</b>   | <b>65244 SPATS2</b> | <b>4741</b> | <b>19.595</b> | <b>9.026</b>  |
| 50064 H12        | M-014310- ChaC, catio        | 79094 CHAC1         | 1495        | 10.569        | 0             |
| 50064 H13        | M-031236- zinc finger,       | 65249 ZSWIM4        | 3301        | 8.1793        | 2.3897        |
| 50064 H14        | M-014309- chromosom          | 79091 C16orf68      | 2836        | 9.9788        | 0.5902        |
| 50064 H15        | M-014243- hypothetic         | 65250 FLJ13231      | 3924        | 12.997        | 2.428         |
| 50064 H16        | M-014308- trafficking        | 79090 TRAPPC6A      | 3994        | 8.7882        | 1.7808        |
| 50064 H17        | M-007057- zinc finger        | 65251 ZNF649        | 3483        | 7.5797        | 2.9893        |
| 50064 H18        | M-014307- transmemk          | 79089 TMUB2         | 4336        | 16.582        | 6.013         |
| 50064 H19        | M-008547- metallophc         | 65258 MPPE1         | 2006        | 5.8824        | 4.6866        |
| 50064 H20        | M-014306- zinc finger        | 79088 ZNF426        | 3548        | 11.781        | 1.212         |
| 50064 H21        | M-014245- chromosom          | 65260 C1orf163      | 3066        | 12.329        | 1.76          |
| 50064 H23        | M-014247- chromosom          | 65265 C8orf33       | 3006        | 5.9215        | 4.6475        |
| 50064 I02        | M-014211- transmemk          | 64788 TMEM112       | 2527        | 11.12         | 0.551         |
| 50064 I04        | M-017269- EPS8-like 2        | 64787 EPS8L2        | 2597        | 16.404        | 5.835         |
| 50064 I05        | M-017849- germ cell-lk       | 64395 GMCL1         | 3356        | 7.2408        | 3.3282        |
| 50064 I06        | M-016209- TBC1 doma          | 64786 TBC1D15       | 3264        | 18.474        | 7.905         |
| 50064 I07        | M-016469- germ cell-lk       | 64396 GMCL1L        | 2970        | 10.875        | 0.306         |
| 50064 I08        | M-016229- GINS comp          | 64785 GINS3         | 2317        | 6.5602        | 4.0088        |
| 50064 I09        | M-014093- zinc finger        | 64397 ZFP106        | 2928        | 12.773        | 2.204         |
| 50064 I10        | M-014210- CREB regul         | 64784 CRTC3         | 3584        | 12.388        | 1.819         |
| 50064 I11        | M-009388- membrane           | 64398 MPP5          | 3117        | 14.662        | 4.093         |
| 50064 I12        | M-016332- interferon :       | 64782 ISG20L1       | 2842        | 11.365        | 0.796         |
| 50064 I13        | M-013018- hedgehog i         | 64399 HHIP          | 2772        | 10.209        | 0.36          |
| 50064 I14        | M-010192- microtubul         | 64780 MICAL1        | 3869        | 5.7121        | 4.8569        |
| 50064 I15        | M-018985- cadherin-lil       | 64403 CDH24         | 5312        | 13.517        | 2.948         |
| 50064 I16        | M-013745- methenylte         | 64779 MTHFSD        | 3396        | 7.5972        | 2.9718        |
| 50064 I17        | M-013099- cadherin-lil       | 64405 CDH22         | 3570        | 6.2465        | 4.3225        |
| 50064 I18        | M-017856- fibronectin        | 64778 FNDC3B        | 2936        | 7.5272        | 3.0418        |
| 50064 I19        | M-008489- regulator o        | 64407 RGS18         | 2775        | 10.27         | 0.299         |
| <b>50064 I20</b> | <b>M-016327- required fo</b> | <b>64777 RMND5B</b> | <b>2116</b> | <b>22.684</b> | <b>12.115</b> |
| 50064 I21        | M-013019- Williams-B         | 64409 WBSCR17       | 3857        | 4.9261        | 5.6429        |
| 50064 I23        | M-016252- kelch-like 2       | 64410 KLHL25        | 4885        | 3.9509        | 6.6181        |
| 50064 J02        | M-014305- chromosom          | 79086 C19orf42      | 3772        | 15.721        | 5.152         |
| 50064 J04        | M-007360- solute carri       | 79085 SLC25A23      | 2610        | 10.728        | 0.159         |
| 50064 J05        | M-004319- pleckstrin f       | 65977 PLEKHA3       | 2434        | 13.928        | 3.359         |
| 50064 J06        | M-006895- WD repeat          | 79084 WDR77         | 2076        | 14.933        | 4.364         |
| 50064 J07        | M-014249- phosphata:         | 65979 PHACTR4       | 1403        | 14.184        | 3.615         |
| 50064 J08        | M-018896- melanophil         | 79083 MLPH          | 1905        | 9.0814        | 1.4876        |
| 50064 J09        | M-014250- bromodom           | 65980 BRD9          | 3325        | 10.917        | 0.348         |

|           |                               |                 |      |        |        |
|-----------|-------------------------------|-----------------|------|--------|--------|
| 50064 J10 | M-006484- chromosom           | 79081 C11orf48  | 3428 | 17.386 | 6.817  |
| 50064 J11 | M-014793- caprin fami         | 65981 CAPRIN2   | 2693 | 17.193 | 6.624  |
| 50064 J12 | M-014304- coiled-coil         | 79080 CCDC86    | 2052 | 11.842 | 1.273  |
| 50064 J13 | M-016474- zinc finger         | 65982 ZSCAN18   | 2612 | 16.08  | 5.511  |
| 50064 J14 | M-014303- chromosom           | 79078 C1orf50   | 2190 | 12.785 | 2.216  |
| 50064 J15 | M-014251- GRAM dom            | 65983 GRAMD3    | 3485 | 11.277 | 0.708  |
| 50064 J16 | M-014302- XTP3-trans          | 79077 XTP3TPA   | 3893 | 13.409 | 2.84   |
| 50064 J17 | M-014252- potassium           | 65987 KCTD14    | 3818 | 13.358 | 2.789  |
| 50064 J18 | M-014300- defective ir        | 79075 DCC1      | 3795 | 9.6443 | 0.9247 |
| 50064 J19 | M-014253- zinc finger         | 65988 ZNF747    | 4094 | 11.822 | 1.253  |
| 50064 J20 | M-014299- chromosom           | 79074 C2orf49   | 1932 | 11.491 | 0.922  |
| 50064 J21 | M-014254- EGF-like-dc         | 65989 EGFL9     | 3761 | 11.274 | 0.705  |
| 50064 J23 | M-014255- chromosom           | 65990 C16orf24  | 3390 | 7.6106 | 2.9584 |
| 50064 K02 | M-013744- chromosom           | 64776 C11orf1   | 4355 | 21.355 | 10.786 |
| 50064 K04 | M-016323- family with         | 64773 FAM113A   | 2659 | 20.233 | 9.664  |
| 50064 K05 | M-007052- centaurin, c        | 64411 CENTD3    | 2426 | 16.241 | 5.672  |
| 50064 K06 | M-016330- chromosom           | 64771 C6orf106  | 3216 | 20.367 | 9.798  |
| 50064 K07 | M-007053- GDNF-indu           | 64412 GZF1      | 3433 | 13.516 | 2.947  |
| 50064 K08 | M-018127- coiled-coil         | 64770 CCDC14    | 2465 | 12.657 | 2.088  |
| 50064 K09 | M-017127- chromosom           | 64417 C5orf28   | 3268 | 13.831 | 3.262  |
| 50064 K10 | M-016326- chromosom           | 64769 C1orf149  | 3559 | 14.021 | 3.452  |
| 50064 K11 | M-016254- transmemk           | 64418 TMEM168   | 3220 | 15.311 | 4.742  |
| 50064 K12 | M-013742- S100P bind          | 64766 S100PBP   | 3184 | 13.788 | 3.219  |
| 50064 K13 | M-016118- myotubula           | 64419 MTMR14    | 2720 | 19.228 | 8.659  |
| 50064 K14 | M-019357- cAMP resp           | 64764 CREB3L2   | 2772 | 14.177 | 3.608  |
| 50064 K15 | M-014096- sushi doma          | 64420 SUSD1     | 3308 | 13.694 | 3.125  |
| 50064 K16 | M-007054- zinc finger         | 64763 ZNF574    | 1292 | 10.681 | 0.112  |
| 50064 K17 | M-015375- ATG3 autoj          | 64422 ATG3      | 4825 | 12.891 | 2.322  |
| 50064 K18 | M-013741- family with         | 64762 FAM59A    | 2881 | 11.801 | 1.232  |
| 50064 K19 | M-014097- chromosom           | 64423 C14orf173 | 2124 | 8.5687 | 2.0003 |
| 50064 K20 | M-013740- poly (ADP-i         | 64761 PARP12    | 5626 | 11.127 | 0.558  |
| 50064 K21 | M-014098- polymerase          | 64425 POLR1E    | 6136 | 10.789 | 0.22   |
| 50064 K23 | M-027133- suppressor          | 64426 SUDS3     | 4603 | 5.844  | 4.725  |
| 50064 L02 | M-014298- transmemk           | 79073 TMEM109   | 2089 | 23.839 | 13.27  |
| 50064 L04 | M-014297- FAST kinase         | 79072 FASTKD3   | 3372 | 24.051 | 13.482 |
| 50064 L05 | M-014256- chromosom           | 65992 C20orf116 | 4071 | 26.971 | 16.402 |
| 50064 L06 | M-008861- ELOVL fami          | 79071 ELOVL6    | 2654 | 20.61  | 10.041 |
| 50064 L07 | M-012884- mitochond           | 65993 MRPS34    | 3013 | 23.332 | 12.763 |
| 50064 L08 | M-014296- KDEL (Lys- <i>A</i> | 79070 KDELC1    | 1931 | 23.252 | 12.683 |
| 50064 L09 | M-014258- hypothetic          | 65996 MGC2752   | 2845 | 22.32  | 11.751 |
| 50064 L10 | M-004159- fat mass ar         | 79068 FTO       | 2585 | 17.756 | 7.187  |
| 50064 L11 | M-014261- leucine rich        | 65999 LRRC61    | 1078 | 29.128 | 18.559 |
| 50064 L12 | M-016359- methyltran          | 79066 METT10D   | 2366 | 19.019 | 8.45   |
| 50064 L13 | M-023601- transmemk           | 66000 TMEM108   | 1527 | 24.689 | 14.12  |
| 50064 L14 | M-014294- ATG9 autoj          | 79065 ATG9A     | 2022 | 26.113 | 15.544 |
| 50064 L15 | M-009127- cytochrom           | 66002 CYP4F12   | 4212 | 18.946 | 8.377  |
| 50064 L16 | M-010369- proline rich        | 79057 PRRG3     | 4127 | 15.071 | 4.502  |

|                  |                               |                   |             |               |              |
|------------------|-------------------------------|-------------------|-------------|---------------|--------------|
| 50064 L17        | M-007511- solute carri        | 66035 SLC2A11     | 2667        | 11.211        | 0.642        |
| 50064 L18        | M-008218- proline rich        | 79056 PRRG4       | 3303        | 18.498        | 7.929        |
| <b>50064 L19</b> | <b>M-021362- bol, boule-l</b> | <b>66037 BOLL</b> | <b>3615</b> | <b>26.639</b> | <b>16.07</b> |
| 50064 L20        | M-014293- nucleolar c         | 79050 NOC4L       | 4257        | 12.591        | 2.022        |
| 50064 L21        | M-016377- cysteine-ric        | 78987 CRELD1      | 6245        | 18.975        | 8.406        |
| 50064 L23        | M-019257- mitochond           | 78988 MRP63       | 4163        | 9.2962        | 1.2728       |
| 50064 M02        | M-018720- retinoic aci        | 64760 RAI16       | 4888        | 9.4108        | 1.1582       |
| 50064 M04        | M-009997- tensin 3            | 64759 TNS3        | 3960        | 8.8636        | 1.7054       |
| 50064 M05        | M-014099- tetratricop         | 64427 TTC31       | 3575        | 6.5455        | 4.0235       |
| 50064 M06        | M-019358- MOCO sulph          | 64757 MOSC1       | 4022        | 7.9314        | 2.6376       |
| 50064 M07        | M-014100- nuclear pre         | 64428 NARFL       | 2787        | 5.2745        | 5.2945       |
| 50064 M08        | M-013738- ATP syntha          | 64756 ATPAF1      | 2891        | 4.3929        | 6.1761       |
| 50064 M09        | M-014101- zinc finger,        | 64429 ZDHHC6      | 3099        | 11.939        | 1.37         |
| 50064 M10        | M-004000- chromosom           | 64755 C16orf58    | 2760        | 4.5652        | 6.0038       |
| 50064 M11        | M-016752- chromosom           | 64430 C14orf135   | 3102        | 4.7066        | 5.8624       |
| 50064 M12        | M-018576- coiled-coil         | 64753 CCDC136     | 3253        | 3.7196        | 6.8494       |
| 50064 M13        | M-010142- mitochond           | 64432 MRPS25      | 2765        | 4.8825        | 5.6865       |
| 50064 M14        | M-013735- major facili        | 64747 MFSD1       | 3814        | 11.51         | 0.941        |
| 50064 M15        | M-025229- nucleolar p         | 64434 NOM1        | 3387        | 2.5096        | 8.0594       |
| 50064 M16        | M-013734- methyltran          | 64745 METT11D1    | 4989        | 13.69         | 3.121        |
| 50064 M17        | M-014171- dynein, axc         | 64446 DNAI2       | 3184        | 8.7312        | 1.8378       |
| 50064 M18        | M-014209- stromal me          | 64744 SMAP1L      | 2355        | 6.1996        | 4.3694       |
| 50064 M19        | M-007288- CUB and Su          | 64478 CSMD1       | 3864        | 7.971         | 2.598        |
| 50064 M20        | M-014266- unkempt h           | 64718 UNKL        | 3524        | 7.0091        | 3.5599       |
| 50064 M21        | M-006056- tryptase be         | 64499 TPSB2       | 2837        | 6.5915        | 3.9775       |
| 50064 M23        | M-017178- cytoplasmic         | 64506 CPEB1       | 3038        | 7.1429        | 3.4261       |
| 50064 N02        | M-015634- SECIS bindi         | 79048 SECISBP2    | 4131        | 11.038        | 0.469        |
| 50064 N04        | M-014292- potassium           | 79047 KCTD15      | 3555        | 11.674        | 1.105        |
| 50064 N05        | M-014267- collectin su        | 78989 COLEC11     | 3185        | 8.9796        | 1.5894       |
| 50064 N06        | M-014290- transmembr          | 79041 TMEM38A     | 2911        | 11.439        | 0.87         |
| 50064 N07        | M-010983- OTU domai           | 78990 OTUB2       | 2262        | 5.084         | 5.485        |
| 50064 N08        | M-017128- DEAD (Asp-          | 79039 DDX54       | 1530        | 6.2745        | 4.2945       |
| 50064 N09        | M-008427- prenylcyste         | 78991 PCYOX1L     | 3193        | 9.6774        | 0.8916       |
| 50064 N10        | M-015889- zinc finger,        | 79038 ZFYVE21     | 1815        | 11.46         | 0.891        |
| 50064 N11        | M-016133- Yip1 domai          | 78992 YIPF2       | 2947        | 6.9562        | 3.6128       |
| 50064 N12        | M-014289- chromosom           | 79036 C19orf50    | 2622        | 7.8185        | 2.7505       |
| 50064 N13        | M-018060- proline rich        | 78994 PRR14       | 3124        | 8.6748        | 1.8942       |
| 50064 N14        | M-014288- oligonuclec         | 79035 OBFC2B      | 3892        | 11.434        | 0.865        |
| 50064 N15        | M-018061- chromosom           | 78995 C17orf53    | 1826        | 7.2289        | 3.3401       |
| 50064 N16        | M-016351- chromosom           | 79034 C7orf26     | 2672        | 15.157        | 4.588        |
| 50064 N17        | M-010208- chromosom           | 78996 C7orf49     | 2345        | 4.307         | 6.262        |
| 50064 N18        | M-021782- prion prote         | 79033 PRNPIP      | 3534        | 18.506        | 7.937        |
| 50064 N19        | M-017342- ganglioside         | 78997 GDAP1L1     | 4131        | 9.9734        | 0.5956       |
| 50064 N20        | M-014287- phosphatidyl        | 79031 PDCL3       | 4140        | 13.188        | 2.619        |
| 50064 N21        | M-016297- leucine rich        | 78999 LRFN4       | 3809        | 7.3773        | 3.1917       |
| 50064 N23        | M-014269- chromosom           | 79000 C1orf135    | 4937        | 9.4389        | 1.1301       |
| 50064 O02        | M-014207- COP9 const          | 64708 COPS7B      | 5811        | 22.44         | 11.871       |

|           |                        |                 |      |        |          |
|-----------|------------------------|-----------------|------|--------|----------|
| 50064 O04 | M-017417- SPANX fam    | 64694 SPANXB2   | 2337 | 10.056 | 0.513    |
| 50064 O05 | M-013509- tektin 3     | 64518 TEK3      | 3687 | 8.6249 | 1.9441   |
| 50064 O06 | M-013844- cutaneous    | 64693 CTAGE1    | 3566 | 11.245 | 0.676    |
| 50064 O07 | M-021476- C-type lecti | 64581 CLEC7A    | 3597 | 11.704 | 1.135    |
| 50064 O08 | M-013510- golgi reassc | 64689 GORASP1   | 3201 | 10.559 | 0.01     |
| 50064 O09 | M-014173- testis speci | 64591 TSPY2     | 3045 | 4.532  | 6.037    |
| 50064 O10 | M-012996- SPANX fam    | 64663 SPANXC    | 2266 | 11.959 | 1.39     |
| 50064 O11 | M-016132- motile sper  | 64598 MOSPD3    | 2577 | 10.361 | 0.208    |
| 50064 O12 | M-017414- SPANX fam    | 64650 SPANXA2   | 1355 | 5.8303 | 4.7387   |
| 50064 O13 | M-014174- PERQ amin    | 64599 PERQ1     | 2649 | 10.57  | 0.001    |
| 50064 O14 | M-013561- SPANX fam    | 64649 SPANXB1   | 2839 | 9.9331 | 0.6359   |
| 50064 O15 | M-008591- phospholip   | 64600 PLA2G2F   | 1956 | 8.4356 | 2.1334   |
| 50064 O16 | M-015060- hippocamp    | 64645 HIAT1     | 3057 | 7.8835 | 2.6855   |
| 50064 O17 | M-021275- chromoson    | 60683 C21orf97  | 2129 | 4.697  | 5.872    |
| 50064 O18 | M-013842- early B-cell | 64641 EBF2      | 3014 | 11.911 | 1.342    |
| 50064 O19 | M-018725- chromoson    | 79173 C19orf57  | 3471 | 13.973 | 3.404    |
| 50064 O20 | M-013003- vacuolar pr  | 64601 VPS16     | 3096 | 5.168  | 5.401    |
| 50064 O21 | M-010856- cysteine-ric | 79174 CRELD2    | 3892 | 6.8602 | 3.7088   |
| 50064 O23 | M-017597- zinc finger  | 79175 ZNF343    | 2363 | 5.84   | 4.729    |
| 50064 P02 | M-008899- spermatog    | 79029 SPATA5L1  | 3209 | 22.842 | 12.273   |
| 50064 P04 | M-014285- AHNAK nuc    | 79026 AHNAK     | 1202 | 17.887 | 7.318    |
| 50064 P05 | M-003998- vitamin K e  | 79001 VKORC1    | 1313 | 16.451 | 5.882    |
| 50064 P06 | M-014284- chromoson    | 79025 C20orf195 | 1322 | 14.297 | 3.728    |
| 50064 P07 | M-014270- chromoson    | 79002 C19orf43  | 2393 | 8.6084 | 1.9606   |
| 50064 P08 | M-014282- nucleoporin  | 79023 NUP37     | 1645 | 8.5106 | 2.0584   |
| 50064 P09 | M-014271- MIS12, MIF   | 79003 MIS12     | 1660 | 10.783 | 0.214    |
| 50064 P10 | M-014281- transmembr   | 79022 TMEM106C  | 3019 | 10.003 | 0.566    |
| 50064 P11 | M-014272- CUE domai    | 79004 CUEDC2    | 1713 | 16.229 | 5.66     |
| 50064 P12 | M-014280- chromoson    | 79020 C7orf25   | 1999 | 17.209 | 6.64     |
| 50064 P13 | M-014273- sodium cha   | 79005 SCNM1     | 1186 | 11.214 | 0.645    |
| 50064 P14 | M-014279- centromer    | 79019 CENPM     | 2161 | 8.746  | 1.823    |
| 50064 P15 | M-014274- meteorin, ξ  | 79006 METRN     | 2491 | 19.872 | 9.303    |
| 50064 P16 | M-017343- chromoson    | 79018 C17orf39  | 2099 | 15.769 | 5.2      |
| 50064 P17 | M-014275- dysbindin (  | 79007 DBNDD1    | 1515 | 7.9208 | 2.6482   |
| 50064 P18 | M-014278- chromoson    | 79017 C7orf24   | 929  | 11.733 | 1.164    |
| 50064 P19 | M-003988- GIY-YIG doi  | 79008 GIYD2     | 1143 | 10.936 | 0.367    |
| 50064 P20 | M-014277- chromoson    | 79016 C19orf58  | 2532 | 13.27  | 2.701    |
| 50064 P21 | M-004255- DEAD (Asp-   | 79009 DDX50     | 1676 | 11.933 | 1.364    |
| 50064 P23 | M-016475- chromoson    | 79014 C16orf67  | 2558 | 11.923 | 1.354    |
|           |                        | MAD             |      | 10.569 | 2.9858   |
|           |                        | MAD3            |      |        | 8.9574   |
|           |                        | MADc            |      |        | 4.418984 |

50064 C22 Human4 Pc RNAi empty

|           |                |       |
|-----------|----------------|-------|
| 50064 D22 | Human4 Pc RNAi | empty |
| 50064 E22 | Human4 Pc RNAi | empty |
| 50064 F22 | Human4 Pc RNAi | empty |

|           |                |       |
|-----------|----------------|-------|
| 50064 G22 | Human4 Pc RNAi | empty |
| 50064 H22 | Human4 Pc RNAi | empty |
| 50064 I22 | Human4 Pc RNAi | empty |
| 50064 J22 | Human4 Pc RNAi | empty |

|           |                                           |                                                           |
|-----------|-------------------------------------------|-----------------------------------------------------------|
| 50064 I03 | Human4 Pc RNAi                            | library cont Dharmacor D-001206-: siControl non-targeting |
| 50064 J03 | Human4 Pc RNAi                            | library cont Dharmacor D-001206-: siControl non-targeting |
| 50064 K03 | Human4 Pc RNAi                            | library cont Dharmacor D-001600-( siGLO RISC-free siRNA   |
| 50064 L03 | Human4 Pc RNAi                            | library cont Dharmacor D-001600-( siGLO RISC-free siRNA   |
| 50064 G03 | M-003290- polo-like kinase 1 (Drosophila) | 5347                                                      |
| 50064 H03 | Human4 Pc RNAi                            | library cont Dharmacor M-003290- polo-like ki 5347        |

| rZ              | cell ct     | % inf         | AD            | rZ              | cell ct     | % inf         | AD            | rZ              |
|-----------------|-------------|---------------|---------------|-----------------|-------------|---------------|---------------|-----------------|
| -1.68776        | 4629        | 9.8077        | 1.8373        | -0.41873        | 2646        | 3.7037        | 8.5843        | -1.79695        |
| -1.40783        | 1927        | 7.4728        | 4.1722        | -0.95087        | 2404        | 5.0749        | 7.2131        | -1.50992        |
| -1.31892        | 1728        | 7.4074        | 4.2376        | -0.96578        | 2135        | 7.3536        | 4.9344        | -1.03292        |
| 0.01652         | 1925        | 7.6364        | 4.0086        | -0.91359        | 1773        | 13.875        | 1.587         | 0.332207        |
| -0.74712        | 2029        | 7.1464        | 4.4986        | -1.02526        | 2457        | 7.6516        | 4.6364        | -0.97054        |
| -0.72619        | 2023        | 9.1448        | 2.5002        | -0.56981        | 3776        | 10.54         | 1.748         | -0.36591        |
| 1.06314         | 2310        | 12.857        | 1.212         | 0.276223        | 2221        | 10.401        | 1.887         | -0.39501        |
| -1.12352        | 1984        | 8.2157        | 3.4293        | -0.78156        | 3600        | 6.3056        | 5.9824        | -1.2523         |
| -0.31392        | 1630        | 10.552        | 1.093         | -0.2491         | 2242        | 8.9652        | 3.3228        | -0.69556        |
| -0.24327        | 2209        | 13.219        | 1.574         | 0.358726        | 2092        | 14.149        | 1.861         | 0.389563        |
| -0.20317        | 1237        | 10.914        | 0.731         | -0.1666         | 2213        | 9.0375        | 3.2505        | -0.68043        |
| 0.068794        | 1812        | 7.2848        | 4.3602        | -0.99372        | 2667        | 11.136        | 1.152         | -0.24115        |
| 0.168364        | 2104        | 13.783        | 2.138         | 0.487265        | 2992        | 12.433        | 0.145         | 0.030353        |
| 0.145282        | 1824        | 11.678        | 0.033         | 0.007521        | 4188        | 14.518        | 2.23          | 0.466806        |
| -1.21499        | 1374        | 11.645        | 0             | 0               | 2219        | 7.7512        | 4.5368        | -0.94969        |
| 0.741573        | 1031        | 12.9          | 1.255         | 0.286023        | 843         | 8.3037        | 3.9843        | -0.83403        |
| 0.133289        | 2023        | 11.616        | 0.029         | -0.00661        | 1728        | 13.947        | 1.659         | 0.347279        |
| 1.059746        | 834         | 8.2734        | 3.3716        | -0.76841        | 1623        | 13.309        | 1.021         | 0.213726        |
| -1.0334         | 1417        | 8.6803        | 2.9647        | -0.67568        | 1521        | 9.6647        | 2.6233        | -0.54914        |
| 0.120163        | 2541        | 9.6812        | 1.9638        | -0.44756        | 1029        | 10.593        | 1.695         | -0.35481        |
| 1.609872        | 4052        | 16.683        | 5.038         | 1.148195        | 2808        | 19.587        | 7.299         | 1.5279          |
| 0.912427        | 923         | 20.693        | 9.048         | 2.062102        | 1321        | 14.686        | 2.398         | 0.501974        |
| 0.233764        | 3530        | 9.0652        | 2.5798        | -0.58795        | 3958        | 12.809        | 0.521         | 0.109061        |
| -0.56818        | 1825        | 12.11         | 0.465         | 0.105977        | 2280        | 11.974        | 0.314         | -0.06573        |
| -0.43472        | 2784        | 8.9799        | 2.6651        | -0.60739        | 2358        | 15.013        | 2.725         | 0.570425        |
| <b>1.474321</b> | <b>2935</b> | <b>22.692</b> | <b>11.047</b> | <b>2.517688</b> | <b>3826</b> | <b>22.556</b> | <b>10.268</b> | <b>2.149401</b> |
| -0.95825        | 2735        | 8.0804        | 3.5646        | -0.8124         | 3843        | 12.542        | 0.254         | 0.05317         |
| -0.3088         | 530         | 7.9245        | 3.7205        | -0.84793        | 3180        | 20.094        | 7.806         | 1.634031        |
| -1.28785        | 1658        | 10.374        | 1.271         | -0.28967        | 3640        | 14.78         | 2.492         | 0.521651        |
| -0.06065        | 1836        | 14.76         | 3.115         | 0.70993         | 2996        | 19.693        | 7.405         | 1.550089        |
| -0.71802        | 1365        | 7.7656        | 3.8794        | -0.88414        | 2946        | 15.716        | 3.428         | 0.717584        |
| -0.99674        | 1651        | 9.9334        | 1.7116        | -0.39009        | 2366        | 14.243        | 1.955         | 0.40924         |
| -0.84721        | 2221        | 9.7704        | 1.8746        | -0.42723        | 4226        | 10.341        | 1.947         | -0.40757        |
| 0.404618        | 1262        | 12.678        | 1.033         | 0.235428        | 2877        | 14.32         | 2.032         | 0.425359        |
| -0.00181        | 2270        | 9.8678        | 1.7772        | -0.40504        | 2788        | 11.334        | 0.954         | -0.1997         |
| -0.78228        | 1493        | 7.1668        | 4.4782        | -1.02061        | 1571        | 12.794        | 0.506         | 0.105921        |
| -0.16101        | 4579        | 16.729        | 5.084         | 1.158679        | 2882        | 11.381        | 0.907         | -0.18986        |
| -0.02919        | 4518        | 13.966        | 2.321         | 0.528972        | 3103        | 11.247        | 1.041         | -0.21791        |
| -1.29946        | 5044        | 9.655         | 1.99          | -0.45353        | 2409        | 13.117        | 0.829         | 0.173535        |
| -1.38423        | 4261        | 13.025        | 1.38          | 0.314512        | 1186        | 9.1906        | 3.0974        | -0.64838        |
| -0.56651        | 3772        | 7.8473        | 3.7977        | -0.86552        | 3208        | 8.9776        | 3.3104        | -0.69297        |
| -0.14508        | 2622        | 9.0008        | 2.6442        | -0.60263        | 4669        | 14.371        | 2.083         | 0.436035        |
| 0.184884        | 3379        | 6.8363        | 4.8087        | -1.09594        | 4874        | 8.5146        | 3.7734        | -0.78989        |
| 0.349854        | 4536        | 14.065        | 2.42          | 0.551535        | 6683        | 13.647        | 1.359         | 0.28448         |
| -1.29955        | 1637        | 3.6042        | 8.0408        | -1.83255        | 2726        | 6.7498        | 5.5382        | -1.15931        |
| 0.560536        | 1384        | 8.0202        | 3.6248        | -0.82612        | 2391        | 9.7449        | 2.5431        | -0.53235        |

|          |      |        |        |          |      |        |        |          |
|----------|------|--------|--------|----------|------|--------|--------|----------|
| -1.4447  | 2835 | 3.8095 | 7.8355 | -1.78576 | 4153 | 9.15   | 3.138  | -0.65688 |
| 0.105228 | 3125 | 11.584 | 0.061  | -0.0139  | 5451 | 15.318 | 3.03   | 0.63427  |
| -0.91127 | 3583 | 6.0564 | 5.5886 | -1.27368 | 5661 | 9.38   | 2.908  | -0.60873 |
| 0.198915 | 3172 | 11.854 | 0.209  | 0.047633 | 3351 | 14.264 | 1.976  | 0.413636 |
| -0.77889 | 2099 | 11.91  | 0.265  | 0.060395 | 3116 | 13.286 | 0.998  | 0.208911 |
| 1.44807  | 1425 | 12.842 | 1.197  | 0.272805 | 2570 | 16.109 | 3.821  | 0.79985  |
| -0.75334 | 1770 | 7.9661 | 3.6789 | -0.83845 | 2720 | 6.9853 | 5.3027 | -1.11001 |
| -1.05513 | 2356 | 2.9711 | 8.6739 | -1.97684 | 4839 | 7.7289 | 4.5591 | -0.95436 |
| -1.50453 | 1577 | 7.546  | 4.099  | -0.93419 | 2290 | 5.5895 | 6.6985 | -1.4022  |
| -0.87488 | 1003 | 8.0758 | 3.5692 | -0.81345 | 1352 | 2.8846 | 9.4034 | -1.96841 |
| -0.14447 | 2085 | 7.9616 | 3.6834 | -0.83947 | 2563 | 13.773 | 1.485  | 0.310855 |
| 0.465265 | 2400 | 8.9167 | 2.7283 | -0.6218  | 2427 | 13.02  | 0.732  | 0.15323  |
| -0.60435 | 2495 | 10.261 | 1.384  | -0.31542 | 2218 | 13.706 | 1.418  | 0.29683  |
| -0.69102 | 3879 | 8.7651 | 2.8799 | -0.65635 | 2563 | 7.9984 | 4.2896 | -0.89794 |
| -0.5089  | 4146 | 9.069  | 2.576  | -0.58709 | 2398 | 6.6305 | 5.6575 | -1.18429 |
| 0.694956 | 3115 | 21.509 | 9.864  | 2.248074 | 3181 | 14.964 | 2.676  | 0.560167 |
| -0.63128 | 2858 | 9.0973 | 2.5477 | -0.58064 | 2946 | 11.168 | 1.12   | -0.23445 |
| -0.0516  | 1733 | 12.579 | 0.934  | 0.212865 | 2565 | 14.074 | 1.786  | 0.373864 |
| -0.81928 | 1493 | 8.1715 | 3.4735 | -0.79163 | 2392 | 7.3161 | 4.9719 | -1.04077 |
| 0.041639 | 2253 | 14.026 | 2.381  | 0.542646 | 2932 | 13.029 | 0.741  | 0.155114 |
| 0.336955 | 1540 | 18.961 | 7.316  | 1.667367 | 2583 | 14.789 | 2.501  | 0.523535 |
| -0.67568 | 1653 | 10.708 | 0.937  | -0.21355 | 4743 | 14.548 | 2.26   | 0.473086 |
| 0.203214 | 2023 | 16.906 | 5.261  | 1.199018 | 3526 | 15.372 | 3.084  | 0.645574 |
| -0.68916 | 2210 | 9.5475 | 2.0975 | -0.47803 | 2987 | 17.375 | 5.087  | 1.064862 |
| -0.56411 | 1383 | 12.581 | 0.936  | 0.213321 | 1599 | 11.382 | 0.906  | -0.18965 |
| -0.42216 | 2396 | 10.225 | 1.42   | -0.32363 | 3779 | 13.893 | 1.605  | 0.335975 |
| -0.4344  | 1701 | 10.406 | 1.239  | -0.28238 | 2920 | 13.014 | 0.726  | 0.151974 |
| 0.545148 | 1722 | 9.0592 | 2.5858 | -0.58932 | 3383 | 15.016 | 2.728  | 0.571052 |
| 0.759677 | 1910 | 18.586 | 6.941  | 1.581902 | 2853 | 18.191 | 5.903  | 1.235676 |
| -0.65024 | 2493 | 10.148 | 1.497  | -0.34118 | 3908 | 12.308 | 0.02   | 0.004187 |
| -0.50247 | 5608 | 16.387 | 4.742  | 1.080735 | 3345 | 11.51  | 0.778  | -0.16286 |
| -0.01086 | 4505 | 12.275 | 0.63   | 0.143581 | 1954 | 7.1648 | 5.1232 | -1.07244 |
| -1.15895 | 4373 | 16.625 | 4.98   | 1.134977 | 2002 | 10.839 | 1.449  | -0.30332 |
| -1.22046 | 4764 | 14.861 | 3.216  | 0.732949 | 1375 | 10.836 | 1.452  | -0.30395 |
| 0.889345 | 2947 | 14.93  | 3.285  | 0.748674 | 2815 | 4.7602 | 7.5278 | -1.5758  |
| 1.109984 | 2564 | 14.236 | 2.591  | 0.590507 | 4503 | 7.5949 | 4.6931 | -0.98241 |
| 2.114513 | 2202 | 17.893 | 6.248  | 1.423962 | 4070 | 9.4103 | 2.8777 | -0.60239 |
| 0.897265 | 1848 | 9.6861 | 1.9589 | -0.44645 | 4012 | 10.169 | 2.119  | -0.44357 |
| -0.00724 | 3135 | 10.367 | 1.278  | -0.29127 | 5219 | 10.634 | 1.654  | -0.34623 |
| 0.310026 | 1389 | 11.519 | 0.126  | -0.02872 | 2326 | 5.761  | 6.527  | -1.3663  |
| -0.10975 | 2413 | 8.247  | 3.398  | -0.77443 | 4045 | 6.4524 | 5.8356 | -1.22157 |
| -0.42917 | 1367 | 8.0468 | 3.5982 | -0.82005 | 4263 | 6.2163 | 6.0717 | -1.27099 |
| -0.47463 | 2268 | 8.9506 | 2.6944 | -0.61407 | 4139 | 9.0602 | 3.2278 | -0.67568 |
| -0.76923 | 1721 | 11.505 | 0.14   | -0.03191 | 2457 | 4.9654 | 7.3226 | -1.53284 |
| 0.013578 | 1269 | 7.2498 | 4.3952 | -1.0017  | 2207 | 10.104 | 2.184  | -0.45718 |
| -0.23211 | 1138 | 6.5026 | 5.1424 | -1.17199 | 1402 | 8.0599 | 4.2281 | -0.88507 |
| -0.82213 | 683  | 11.42  | 0.225  | -0.05128 | 1798 | 5.0056 | 7.2824 | -1.52443 |

|          |      |        |        |          |      |        |        |          |
|----------|------|--------|--------|----------|------|--------|--------|----------|
| -0.97353 | 2467 | 6.6478 | 4.9972 | -1.1389  | 4937 | 7.3729 | 4.9151 | -1.02888 |
| -0.54178 | 1648 | 10.012 | 1.633  | -0.37217 | 4228 | 10.762 | 1.526  | -0.31944 |
| -0.91306 | 2119 | 6.4181 | 5.2269 | -1.19125 | 2977 | 7.1884 | 5.0996 | -1.0675  |
| 0.406881 | 4544 | 16.329 | 4.684  | 1.067516 | 3610 | 12.798 | 0.51   | 0.106758 |
| 1.243499 | 3771 | 16.335 | 4.69   | 1.068884 | 2299 | 15.659 | 3.371  | 0.705652 |
| -0.30851 | 2467 | 6.0803 | 5.5647 | -1.26823 | 1855 | 7.8167 | 4.4713 | -0.93598 |
| -1.01093 | 2407 | 11.965 | 0.32   | 0.07293  | 1186 | 5.8179 | 6.4701 | -1.35439 |
| -0.15117 | 4681 | 10.81  | 0.835  | -0.1903  | 3074 | 17.306 | 5.018  | 1.050418 |
| -0.56796 | 2634 | 9.4913 | 2.1537 | -0.49084 | 1829 | 12.849 | 0.561  | 0.117434 |
| 0.443993 | 1537 | 8.1327 | 3.5123 | -0.80048 | 2570 | 15.486 | 3.198  | 0.669438 |
| 0.599459 | 2404 | 13.894 | 2.249  | 0.512563 | 2874 | 19.346 | 7.058  | 1.477452 |
| -0.82521 | 1914 | 8.9864 | 2.6586 | -0.60591 | 2117 | 8.2664 | 4.0216 | -0.84184 |
| 0.430416 | 2489 | 10.446 | 1.199  | -0.27326 | 3197 | 19.299 | 7.011  | 1.467613 |
| -0.26891 | 1560 | 15.064 | 3.419  | 0.779214 | 2131 | 16.33  | 4.042  | 0.846112 |
| 1.20367  | 1226 | 7.3409 | 4.3041 | -0.98093 | 2189 | 12.197 | 0.091  | -0.01905 |
| 1.414805 | 2007 | 14.748 | 3.103  | 0.707195 | 595  | 51.765 | 39.477 | 8.263724 |
| -0.49389 | 1417 | 9.2449 | 2.4001 | -0.547   | 1496 | 13.235 | 0.947  | 0.198236 |
| -0.41362 | 2538 | 7.9196 | 3.7254 | -0.84904 | 3190 | 12.288 | 0      | 0        |
| -0.48473 | 3439 | 8.6944 | 2.9506 | -0.67246 | 2630 | 10.684 | 1.604  | -0.33577 |
| -0.05635 | 1884 | 11.89  | 0.245  | 0.055837 | 1730 | 22.312 | 10.024 | 2.098325 |
| 0.115411 | 1967 | 16.726 | 5.081  | 1.157995 | 2374 | 17.86  | 5.572  | 1.166387 |
| -1.12055 | 2241 | 7.1397 | 4.5053 | -1.02679 | 1659 | 10.91  | 1.378  | -0.28846 |
| 0.027156 | 1338 | 7.1001 | 4.5449 | -1.03581 | 1807 | 9.5739 | 2.7141 | -0.56814 |
| 0.954065 | 5819 | 13.782 | 2.137  | 0.487037 | 2838 | 10.712 | 1.576  | -0.3299  |
| 1.211591 | 6651 | 20.162 | 8.517  | 1.941083 | 2033 | 18.446 | 6.158  | 1.289055 |
| -0.94843 | 6967 | 16.894 | 5.249  | 1.196283 | 1347 | 7.0527 | 5.2353 | -1.09591 |
| -0.00747 | 6790 | 14.197 | 2.552  | 0.581618 | 691  | 7.8148 | 4.4732 | -0.93638 |
| 0.245532 | 4338 | 7.8147 | 3.8303 | -0.87295 | 1980 | 8.7879 | 3.5001 | -0.73268 |
| 0.833223 | 4221 | 17.2   | 5.555  | 1.266023 | 1721 | 16.386 | 4.098  | 0.857835 |
| -0.28402 | 4176 | 14.919 | 3.274  | 0.746167 | 3839 | 8.8825 | 3.4055 | -0.71287 |
| 0.186016 | 3856 | 9.6214 | 2.0236 | -0.46119 | 3538 | 8.5924 | 3.6956 | -0.7736  |
| -0.83601 | 1877 | 12.04  | 0.395  | 0.090023 | 1795 | 5.9053 | 6.3827 | -1.33609 |
| -0.9098  | 3606 | 10.427 | 1.218  | -0.27759 | 3891 | 7.6073 | 4.6807 | -0.97981 |
| -0.8704  | 1875 | 6.9333 | 4.7117 | -1.07383 | 1961 | 4.2835 | 8.0045 | -1.67558 |
| 0.399866 | 2788 | 13.271 | 1.626  | 0.370577 | 3793 | 10.704 | 1.584  | -0.33158 |
| 1.085996 | 3282 | 24.985 | 13.34  | 3.040278 | 2687 | 24.749 | 12.461 | 2.608462 |
| -0.57443 | 1902 | 7.7813 | 3.8637 | -0.88056 | 2122 | 10.462 | 1.826  | -0.38224 |
| 1.240104 | 2190 | 26.804 | 15.159 | 3.454841 | 2500 | 26.68  | 14.392 | 3.012679 |
| 0.910617 | 2610 | 15.939 | 4.294  | 0.978632 | 3129 | 18.984 | 6.696  | 1.401674 |
| 0.02263  | 2886 | 11.504 | 0.141  | -0.03213 | 3259 | 12.673 | 0.385  | 0.080592 |
| 0.297806 | 2378 | 8.9992 | 2.6458 | -0.603   | 3063 | 12.014 | 0.274  | -0.05736 |
| -0.95493 | 1812 | 9.3267 | 2.3183 | -0.52836 | 2462 | 7.3517 | 4.9363 | -1.03332 |
| 0.383572 | 2542 | 15.106 | 3.461  | 0.788786 | 2125 | 16.612 | 4.324  | 0.905143 |
| -0.18126 | 1922 | 9.4173 | 2.2277 | -0.50771 | 2390 | 13.18  | 0.892  | 0.186722 |
| -0.69367 | 2657 | 9.1833 | 2.4617 | -0.56104 | 2179 | 7.8476 | 4.4404 | -0.92951 |
| -0.76638 | 3525 | 8.9645 | 2.6805 | -0.6109  | 3071 | 9.5409 | 2.7471 | -0.57505 |
| -1.486   | 3816 | 10.613 | 1.032  | -0.2352  | 1531 | 5.356  | 6.932  | -1.45108 |



|                 |             |               |               |                 |             |               |               |                 |
|-----------------|-------------|---------------|---------------|-----------------|-------------|---------------|---------------|-----------------|
| -0.16744        | 3225        | 11.969        | 0.324         | 0.073842        | 2005        | 6.3342        | 5.9538        | -1.24631        |
| 2.262964        | 2378        | 16.947        | 5.302         | 1.208363        | 2651        | 18.936        | 6.648         | 1.391626        |
| 0.703555        | 3218        | 15.6          | 3.955         | 0.901372        | 2752        | 13.445        | 1.157         | 0.242195        |
| 1.506681        | 3550        | 19.014        | 7.369         | 1.679446        | 4408        | 16.742        | 4.454         | 0.932356        |
| -1.27122        | 937         | 13.767        | 2.122         | 0.483619        | 1506        | 14.276        | 1.988         | 0.416148        |
| -0.8953         | 2245        | 7.9287        | 3.7163        | -0.84697        | 2210        | 13.62         | 1.332         | 0.278828        |
| -0.29799        | 1113        | 19.587        | 7.942         | 1.810037        | 1924        | 14.917        | 2.629         | 0.550329        |
| -0.42815        | 1431        | 14.885        | 3.24          | 0.738418        | 1861        | 13.434        | 1.146         | 0.239892        |
| <b>2.042551</b> | <b>3030</b> | <b>23.894</b> | <b>12.249</b> | <b>2.791632</b> | <b>4112</b> | <b>22.933</b> | <b>10.645</b> | <b>2.228319</b> |
| 0               | 1062        | 14.595        | 2.95          | 0.672325        | 1427        | 14.506        | 2.218         | 0.464294        |
| -0.54078        | 1566        | 19.157        | 7.512         | 1.712037        | 2776        | 15.202        | 2.914         | 0.609988        |
| -0.13356        | 2214        | 13.144        | 1.499         | 0.341632        | 2144        | 15.718        | 3.43          | 0.718002        |
| 0.549448        | 3024        | 20.8          | 9.155         | 2.086488        | 2905        | 19.759        | 7.471         | 1.563905        |
| -0.40299        | 3644        | 12.569        | 0.924         | 0.210586        | 4105        | 11.157        | 1.131         | -0.23675        |
| -0.67647        | 2497        | 11.734        | 0.089         | 0.020284        | 3190        | 9.0596        | 3.2284        | -0.6758         |
| 1.36072         | 2932        | 20.191        | 8.546         | 1.947693        | 3661        | 19.749        | 7.461         | 1.561812        |
| -1.06056        | 3717        | 15.792        | 4.147         | 0.94513         | 1966        | 7.7823        | 4.5057        | -0.94318        |
| 0.274271        | 4820        | 18.672        | 7.027         | 1.601502        | 3331        | 15.581        | 3.293         | 0.689324        |
| 0.398282        | 6006        | 21.961        | 10.316        | 2.351088        | 2782        | 11.538        | 0.75          | -0.157          |
| -1.05171        | 4654        | 12.677        | 1.032         | 0.2352          | 1100        | 9.3636        | 2.9244        | -0.61216        |
| 0.124689        | 1985        | 15.214        | 3.569         | 0.8134          | 2201        | 10.223        | 2.065         | -0.43227        |
| 1.320439        | 2666        | 11.328        | 0.317         | -0.07225        | 3236        | 10.352        | 1.936         | -0.40526        |
| -0.75316        | 3129        | 9.5238        | 2.1212        | -0.48344        | 4120        | 6.6748        | 5.6132        | -1.17501        |
| 1.788873        | 3328        | 18.72         | 7.075         | 1.612442        | 5569        | 18.711        | 6.423         | 1.344527        |
| 0.069247        | 2800        | 10.786        | 0.859         | -0.19577        | 4631        | 11.639        | 0.649         | -0.13586        |
| -0.90718        | 2746        | 8.0845        | 3.5605        | -0.81146        | 2998        | 9.4396        | 2.8484        | -0.59626        |
| 0.498757        | 2351        | 14.547        | 2.902         | 0.661386        | 3843        | 11.762        | 0.526         | -0.11011        |
| 0.411633        | 2750        | 10.945        | 0.7           | -0.15953        | 4291        | 10.021        | 2.267         | -0.47455        |
| 0.926231        | 1877        | 11.774        | 0.129         | 0.0294          | 4456        | 14.048        | 1.76          | 0.368421        |
| 0.180132        | 2723        | 10.65         | 0.995         | -0.22677        | 3251        | 13.073        | 0.785         | 0.164324        |
| -0.08147        | 2220        | 12.748        | 1.103         | 0.251381        | 2481        | 11.245        | 1.043         | -0.21833        |
| -1.0991         | 4430        | 10.7          | 0.945         | -0.21537        | 4923        | 10.075        | 2.213         | -0.46325        |
| 0.667122        | 2601        | 9.2272        | 2.4178        | -0.55103        | 4084        | 9.4515        | 2.8365        | -0.59376        |
| -0.67251        | 2590        | 5.9073        | 5.7377        | -1.30766        | 3346        | 8.9958        | 3.2922        | -0.68916        |
| -0.97817        | 2423        | 7.4288        | 4.2162        | -0.9609         | 3526        | 9.5009        | 2.7871        | -0.58342        |
| -0.68835        | 1716        | 8.7995        | 2.8455        | -0.64851        | 2503        | 10.348        | 1.94          | -0.4061         |
| -0.06766        | 3133        | 9.767         | 1.878         | -0.42801        | 3222        | 10.708        | 1.58          | -0.33074        |
| <b>2.74158</b>  | <b>1755</b> | <b>29.63</b>  | <b>17.985</b> | <b>4.098906</b> | <b>2065</b> | <b>23.148</b> | <b>10.86</b>  | <b>2.273325</b> |
| -1.27697        | 3700        | 9.8108        | 1.8342        | -0.41803        | 3217        | 10.32         | 1.968         | -0.41196        |
| -1.49765        | 3803        | 4.9698        | 6.6752        | -1.52132        | 2861        | 7.5149        | 4.7731        | -0.99915        |
| 1.165879        | 2678        | 20.836        | 9.191         | 2.094693        | 1756        | 8.2574        | 4.0306        | -0.84373        |
| 0.035981        | 2497        | 15.058        | 3.413         | 0.777846        | 3073        | 10.348        | 1.94          | -0.4061         |
| 0.760129        | 2350        | 19.787        | 8.142         | 1.855618        | 3396        | 8.9223        | 3.3657        | -0.70454        |
| 0.987557        | 2133        | 14.909        | 3.264         | 0.743888        | 2255        | 9.3126        | 2.9754        | -0.62284        |
| 0.818061        | 2021        | 20.485        | 8.84          | 2.014697        | 2093        | 13.33         | 1.042         | 0.218122        |
| -0.33664        | 1867        | 11.302        | 0.343         | -0.07817        | 1289        | 11.559        | 0.729         | -0.1526         |
| 0.078751        | 2829        | 12.478        | 0.833         | 0.189846        | 2852        | 10.835        | 1.453         | -0.30416        |

|          |      |        |        |          |      |        |        |          |
|----------|------|--------|--------|----------|------|--------|--------|----------|
| 1.542662 | 3421 | 20.228 | 8.583  | 1.956125 | 2407 | 17.948 | 5.66   | 1.184808 |
| 1.498987 | 3850 | 23.247 | 11.602 | 2.644176 | 3188 | 15.339 | 3.051  | 0.638666 |
| 0.288075 | 1945 | 13.985 | 2.34   | 0.533302 | 1378 | 14.949 | 2.661  | 0.557027 |
| 1.247119 | 2847 | 17.668 | 6.023  | 1.372683 | 1848 | 14.881 | 2.593  | 0.542793 |
| 0.501473 | 2890 | 11.176 | 0.469  | -0.10689 | 2352 | 17.602 | 5.314  | 1.11238  |
| 0.160218 | 4361 | 13.414 | 1.769  | 0.403167 | 2710 | 9.4096 | 2.8784 | -0.60254 |
| 0.642682 | 3826 | 12.258 | 0.613  | 0.139707 | 2315 | 7.6026 | 4.6854 | -0.9808  |
| 0.631141 | 3380 | 10.828 | 0.817  | -0.1862  | 3406 | 11.421 | 0.867  | -0.18149 |
| -0.20926 | 4471 | 13.04  | 1.395  | 0.31793  | 3985 | 9.1092 | 3.1788 | -0.66542 |
| 0.283549 | 6079 | 15.628 | 3.983  | 0.907753 | 3932 | 10.783 | 1.505  | -0.31504 |
| 0.208645 | 6421 | 22.286 | 10.641 | 2.425158 | 1936 | 12.655 | 0.367  | 0.076824 |
| 0.159539 | 7163 | 22.714 | 11.069 | 2.522702 | 3368 | 10.6   | 1.688  | -0.35335 |
| -0.66948 | 5001 | 15.157 | 3.512  | 0.800409 | 1129 | 9.8317 | 2.4563 | -0.51418 |
| 2.440833 | 4177 | 19.416 | 7.771  | 1.771065 | 4205 | 13.317 | 1.029  | 0.215401 |
| 2.186928 | 1777 | 15.926 | 4.281  | 0.97567  | 2335 | 24.069 | 11.781 | 2.466118 |
| 1.283553 | 2278 | 15.057 | 3.412  | 0.777618 | 2944 | 13.043 | 0.755  | 0.158044 |
| 2.217252 | 3633 | 17.203 | 5.558  | 1.266707 | 3028 | 18.692 | 6.404  | 1.34055  |
| 0.666895 | 4595 | 13.166 | 1.521  | 0.346646 | 4718 | 15.833 | 3.545  | 0.742075 |
| 0.472507 | 3642 | 12.685 | 1.04   | 0.237023 | 2962 | 26.232 | 13.944 | 2.918899 |
| 0.738179 | 3770 | 13.793 | 2.148  | 0.489544 | 4684 | 14.923 | 2.635  | 0.551585 |
| 0.781175 | 2580 | 21.163 | 9.518  | 2.169218 | 3613 | 15.527 | 3.239  | 0.67802  |
| 1.073097 | 3407 | 20.869 | 9.224  | 2.102214 | 3565 | 20.281 | 7.993  | 1.673175 |
| 0.728448 | 3587 | 19.32  | 7.675  | 1.749186 | 2935 | 17.479 | 5.191  | 1.086633 |
| 1.9595   | 2259 | 19.345 | 7.7    | 1.754883 | 3304 | 22.215 | 9.927  | 2.07802  |
| 0.816477 | 3590 | 16.017 | 4.372  | 0.996409 | 1922 | 19.407 | 7.119  | 1.490221 |
| 0.707176 | 2634 | 11.238 | 0.407  | -0.09276 | 2562 | 14.169 | 1.881  | 0.39375  |
| 0.025345 | 1228 | 18.73  | 7.085  | 1.614721 | 1245 | 21.124 | 8.836  | 1.849641 |
| 0.52546  | 3302 | 15.899 | 4.254  | 0.969516 | 3750 | 17.173 | 4.885  | 1.022578 |
| 0.278797 | 2558 | 15.598 | 3.953  | 0.900916 | 2725 | 21.028 | 8.74   | 1.829545 |
| -0.45266 | 2408 | 11.171 | 0.474  | -0.10803 | 1589 | 25.425 | 13.137 | 2.749969 |
| 0.126273 | 3082 | 15.412 | 3.767  | 0.858525 | 4504 | 21.514 | 9.226  | 1.931279 |
| 0.049785 | 3779 | 13.39  | 1.745  | 0.397698 | 4285 | 19.837 | 7.549  | 1.580233 |
| -1.06925 | 3521 | 10.736 | 0.909  | -0.20717 | 2516 | 16.494 | 4.206  | 0.880442 |
| 3.002953 | 2963 | 20.351 | 8.706  | 1.984158 | 2553 | 16.53  | 4.242  | 0.887978 |
| 3.050928 | 3173 | 26.347 | 14.702 | 3.350688 | 4646 | 21.158 | 8.87   | 1.856758 |
| 3.711713 | 5622 | 21.932 | 10.287 | 2.344479 | 4989 | 21.006 | 8.718  | 1.82494  |
| 2.272242 | 4225 | 23.314 | 11.669 | 2.659446 | 3738 | 25.094 | 12.806 | 2.680681 |
| 2.88822  | 4056 | 17.061 | 5.416  | 1.234344 | 4313 | 24.855 | 12.567 | 2.630651 |
| 2.870117 | 2200 | 17.955 | 6.31   | 1.438093 | 2454 | 16.585 | 4.297  | 0.899491 |
| 2.659209 | 2858 | 22.393 | 10.748 | 2.449544 | 3702 | 24.338 | 12.05  | 2.522428 |
| 1.626392 | 3334 | 17.966 | 6.321  | 1.4406   | 3220 | 23.82  | 11.532 | 2.413995 |
| 4.199834 | 1319 | 22.82  | 11.175 | 2.54686  | 1236 | 30.016 | 17.728 | 3.711004 |
| 1.912204 | 2471 | 20.882 | 9.237  | 2.105176 | 2419 | 25.382 | 13.094 | 2.740968 |
| 3.195305 | 2174 | 17.157 | 5.512  | 1.256223 | 2159 | 26.401 | 14.113 | 2.954276 |
| 3.517551 | 5052 | 30.483 | 18.838 | 4.293311 | 2561 | 28.856 | 16.568 | 3.468181 |
| 1.895685 | 4510 | 18.78  | 7.135  | 1.626116 | 2618 | 19.939 | 7.651  | 1.601585 |
| 1.018786 | 3960 | 9.6717 | 1.9733 | -0.44973 | 2187 | 25.926 | 13.638 | 2.854844 |

|                 |             |               |               |                |             |               |               |                 |
|-----------------|-------------|---------------|---------------|----------------|-------------|---------------|---------------|-----------------|
| 0.145282        | 1985        | 12.393        | 0.748         | 0.170474       | 1567        | 21.315        | 9.027         | 1.889623        |
| 1.794304        | 4141        | 16.325        | 4.68          | 1.066604       | 4092        | 20.552        | 8.264         | 1.729904        |
| <b>3.636583</b> | <b>7785</b> | <b>23.532</b> | <b>11.887</b> | <b>2.70913</b> | <b>4169</b> | <b>23.963</b> | <b>11.675</b> | <b>2.443929</b> |
| 0.457571        | 6537        | 12.682        | 1.037         | 0.236339       | 3553        | 9.4849        | 2.8031        | -0.58677        |
| 1.902247        | 6675        | 23.101        | 11.456        | 2.610902       | 3901        | 21.712        | 9.424         | 1.972727        |
| -0.28803        | 5368        | 9.7243        | 1.9207        | -0.43774       | 1821        | 14.992        | 2.704         | 0.566029        |
| -0.2621         | 4323        | 11.867        | 0.222         | 0.050595       | 3648        | 9.2928        | 2.9952        | -0.62699        |
| -0.38593        | 3368        | 9.709         | 1.936         | -0.44123       | 4019        | 7.2406        | 5.0474        | -1.05657        |
| -0.9105         | 3220        | 9.2547        | 2.3903        | -0.54477       | 3883        | 11.847        | 0.441         | -0.09231        |
| -0.59688        | 4604        | 14.075        | 2.43          | 0.553814       | 5427        | 15.607        | 3.319         | 0.694767        |
| -1.19813        | 2592        | 11.188        | 0.457         | -0.10415       | 3279        | 9.6371        | 2.6509        | -0.55491        |
| -1.39763        | 4314        | 7.5104        | 4.1346        | -0.9423        | 3386        | 7.3243        | 4.9637        | -1.03905        |
| 0.310026        | 3814        | 12.192        | 0.547         | 0.124665       | 4112        | 16.148        | 3.86          | 0.808014        |
| -1.35864        | 2980        | 4.9329        | 6.7121        | -1.52973       | 3964        | 6.6852        | 5.6028        | -1.17283        |
| -1.32664        | 3828        | 8.2288        | 3.4162        | -0.77858       | 5298        | 7.7765        | 4.5115        | -0.94439        |
| -1.54999        | 2780        | 2.518         | 9.127         | -2.08011       | 3599        | 5.8905        | 6.3975        | -1.33919        |
| -1.28683        | 2696        | 8.3828        | 3.2622        | -0.74348       | 3215        | 6.1275        | 6.1605        | -1.28958        |
| 0.212945        | 4288        | 14.576        | 2.931         | 0.667995       | 4678        | 14.793        | 2.505         | 0.524372        |
| -1.82381        | 4100        | 3.7561        | 7.8889        | -1.79793       | 4255        | 6.2985        | 5.9895        | -1.25378        |
| 0.706271        | 3928        | 12.678        | 1.033         | 0.235428       | 6206        | 20.851        | 8.563         | 1.792494        |
| -0.41589        | 3645        | 8.6694        | 2.9756        | -0.67816       | 4499        | 10.247        | 2.041         | -0.42724        |
| -0.98878        | 1598        | 6.8836        | 4.7614        | -1.08516       | 2897        | 8.7332        | 3.5548        | -0.74413        |
| -0.58792        | 3150        | 5.4603        | 6.1847        | -1.40954       | 4078        | 9.1957        | 3.0923        | -0.64731        |
| -0.80559        | 4412        | 9.6102        | 2.0348        | -0.46375       | 4913        | 10.727        | 1.561         | -0.32676        |
| -0.90009        | 3021        | 6.4217        | 5.2233        | -1.19043       | 3584        | 7.2266        | 5.0614        | -1.0595         |
| -0.77531        | 3211        | 6.4466        | 5.1984        | -1.18475       | 2780        | 7.8777        | 4.4103        | -0.92321        |
| 0.106133        | 3901        | 13.509        | 1.864         | 0.424819       | 4336        | 8.8792        | 3.4088        | -0.71356        |
| 0.250057        | 3158        | 13.585        | 1.94          | 0.442139       | 3624        | 15.342        | 3.054         | 0.639294        |
| -0.35968        | 3210        | 10.062        | 1.583         | -0.36078       | 3849        | 8.3398        | 3.9482        | -0.82648        |
| 0.196878        | 2869        | 13.628        | 1.983         | 0.451939       | 4003        | 14.514        | 2.226         | 0.465969        |
| -1.24124        | 1491        | 12.14         | 0.495         | 0.112814       | 2361        | 7.4121        | 4.8759        | -1.02067        |
| -0.97183        | 1964        | 11.405        | 0.24          | -0.0547        | 2201        | 6.5879        | 5.7001        | -1.1932         |
| -0.20177        | 3228        | 10.285        | 1.36          | -0.30995       | 4260        | 12.653        | 0.365         | 0.076405        |
| 0.20163         | 1771        | 9.3732        | 2.2718        | -0.51776       | 2298        | 9.3124        | 2.9756        | -0.62288        |
| -0.81756        | 3851        | 8.4653        | 3.1797        | -0.72468       | 4938        | 9.032         | 3.256         | -0.68158        |
| -0.62243        | 2003        | 11.133        | 0.512         | -0.11669       | 2888        | 7.3753        | 4.9127        | -1.02838        |
| -0.42865        | 2110        | 10.047        | 1.598         | -0.3642        | 4420        | 10.407        | 1.881         | -0.39375        |
| 0.195746        | 3356        | 18.355        | 6.71          | 1.529256       | 3643        | 16.195        | 3.907         | 0.817853        |
| -0.75585        | 1405        | 9.6797        | 1.9653        | -0.44791       | 2085        | 8.9688        | 3.3192        | -0.69481        |
| 1.038248        | 1495        | 9.4314        | 2.2136        | -0.50449       | 4008        | 14.746        | 2.458         | 0.514533        |
| -1.41707        | 1521        | 5.5884        | 6.0566        | -1.38034       | 3211        | 8.8757        | 3.4123        | -0.7143         |
| 1.796114        | 2090        | 8.8995        | 2.7455        | -0.62572       | 4603        | 18.249        | 5.961         | 1.247817        |
| -0.13478        | 5936        | 10.175        | 1.47          | -0.33502       | 5442        | 8.9673        | 3.3207        | -0.69512        |
| 0.59267         | 5634        | 16.01         | 4.365         | 0.994814       | 5049        | 14.181        | 1.893         | 0.396262        |
| -0.72227        | 5393        | 10.681        | 0.964         | -0.2197        | 2673        | 6.3599        | 5.9281        | -1.24093        |
| -0.25574        | 2721        | 7.5707        | 4.0743        | -0.92856       | 3160        | 3.2278        | 9.0602        | -1.89657        |
| 2.686364        | 3949        | 19.093        | 7.448         | 1.697451       | 3768        | 14.889        | 2.601         | 0.544468        |

|          |      |        |          |          |      |        |          |          |
|----------|------|--------|----------|----------|------|--------|----------|----------|
| -0.11609 | 2048 | 12.402 | 0.757    | 0.172526 | 2557 | 14.079 | 1.791    | 0.37491  |
| -0.43994 | 3087 | 11.144 | 0.501    | -0.11418 | 3464 | 11.605 | 0.683    | -0.14297 |
| 0.152976 | 3184 | 8.5741 | 3.0709   | -0.69988 | 3584 | 13.979 | 1.691    | 0.353977 |
| 0.256846 | 2995 | 9.3489 | 2.2961   | -0.5233  | 2875 | 10.435 | 1.853    | -0.38789 |
| -0.00226 | 2565 | 9.4347 | 2.2103   | -0.50374 | 2600 | 11.462 | 0.826    | -0.17291 |
| -1.36615 | 2259 | 6.6844 | 4.9606   | -1.13056 | 2074 | 11.379 | 0.909    | -0.19028 |
| 0.314552 | 2328 | 8.8058 | 2.8392   | -0.64707 | 3141 | 9.774  | 2.514    | -0.52626 |
| -0.04707 | 5203 | 7.3611 | 4.2839   | -0.97633 | 847  | 27.037 | 14.749   | 3.08741  |
| -1.07235 | 2025 | 10.568 | 1.077    | -0.24546 | 2008 | 10.807 | 1.481    | -0.31002 |
| 0.000226 | 1997 | 10.966 | 0.679    | -0.15475 | 2296 | 10.322 | 1.966    | -0.41154 |
| -0.1439  | 2036 | 8.7426 | 2.9024   | -0.66148 | 2422 | 14.244 | 1.956    | 0.40945  |
| -0.48278 | 1873 | 7.795  | 3.85     | -0.87744 | 2119 | 15.715 | 3.427    | 0.717374 |
| -0.60772 | 1260 | 5      | 6.645    | -1.51444 | 3442 | 9.5293 | 2.7587   | -0.57748 |
| -1.32881 | 1320 | 5.3788 | 6.2662   | -1.42811 | 2935 | 9.3697 | 2.9183   | -0.61089 |
| 0.30369  | 2199 | 11.824 | 0.179    | 0.040795 | 3574 | 16.592 | 4.304    | 0.900957 |
| 0.770313 | 2675 | 14.206 | 2.561    | 0.58367  | 3086 | 23.785 | 11.497   | 2.406668 |
| -1.22223 | 2484 | 8.7359 | 2.9091   | -0.663   | 4222 | 12.577 | 0.289    | 0.060496 |
| -0.83929 | 1975 | 6.1266 | 5.5184   | -1.25768 | 2184 | 7.6007 | 4.6873   | -0.98119 |
| -1.07016 | 1124 | 4.0925 | 7.5525   | -1.72127 | 1473 | 10.591 | 1.697    | -0.35523 |
| 2.777335 | 2168 | 9.1328 | 2.5122   | -0.57255 | 3371 | 16.642 | 4.354    | 0.911423 |
| 1.656037 | 609  | 18.062 | 6.417    | 1.462479 | 1523 | 17.4   | 5.112    | 1.070095 |
| 1.331075 | 780  | 18.59  | 6.945    | 1.582814 | 2524 | 12.163 | 0.125    | -0.02617 |
| 0.843633 | 1647 | 18.64  | 6.995    | 1.594209 | 1924 | 13.877 | 1.589    | 0.332626 |
| -0.44368 | 1203 | 14.464 | 2.819    | 0.64247  | 1327 | 11.153 | 1.135    | -0.23759 |
| -0.46581 | 1716 | 11.48  | 0.165    | -0.0376  | 2397 | 11.431 | 0.857    | -0.1794  |
| 0.048427 | 2056 | 9.7276 | 1.9174   | -0.43699 | 1594 | 16.75  | 4.462    | 0.934031 |
| -0.12808 | 2875 | 13.948 | 2.303    | 0.52487  | 2614 | 11.094 | 1.194    | -0.24994 |
| 1.280837 | 2908 | 19.498 | 7.853    | 1.789753 | 1498 | 23.231 | 10.943   | 2.290699 |
| 1.502608 | 3820 | 22.88  | 11.235   | 2.560534 | 3080 | 21.006 | 8.718    | 1.82494  |
| 0.145961 | 1611 | 11.608 | 0.037    | -0.00843 | 1827 | 16.475 | 4.187    | 0.876465 |
| -0.41254 | 2980 | 11.376 | 0.269    | -0.06131 | 2348 | 9.9659 | 2.3221   | -0.48609 |
| 2.105235 | 2453 | 14.146 | 2.501    | 0.569995 | 2255 | 17.517 | 5.229    | 1.094587 |
| 1.176741 | 1296 | 13.966 | 2.321    | 0.528972 | 1762 | 13.507 | 1.219    | 0.255173 |
| -0.59928 | 1430 | 12.308 | 0.663    | 0.151102 | 2105 | 9.5962 | 2.6918   | -0.56347 |
| 0.263409 | 1069 | 15.716 | 4.071    | 0.927809 | 1326 | 16.063 | 3.775    | 0.790221 |
| 0.083051 | 5367 | 12.782 | 1.137    | 0.25913  | 2085 | 14.149 | 1.861    | 0.389563 |
| 0.611226 | 4849 | 15.385 | 3.74     | 0.852372 | 2523 | 13.238 | 0.95     | 0.198864 |
| 0.308668 | 4194 | 14.783 | 3.138    | 0.715172 | 1416 | 14.407 | 2.119    | 0.44357  |
| 0.306405 | 4390 | 11.936 | 0.291    | 0.066321 | 1424 | 15.801 | 3.513    | 0.735377 |
|          |      | 11.645 | 2.9647   |          |      | 12.288 | 3.2278   |          |
|          |      |        | 8.8941   |          |      |        | 9.6834   |          |
|          |      |        | 4.387756 |          |      |        | 4.777144 |          |
|          | 2036 | 34.086 | 1752     | 37.842   | 1753 | 34.626 |          |          |

|           |          |          |          |          |          |          |
|-----------|----------|----------|----------|----------|----------|----------|
|           | 3332     | 30.132   | 4994     | 38.947   | 2763     | 41.911   |
|           | 2969     | 31.021   | 2061     | 46.24    | 1750     | 44.629   |
|           | 3815     | 36.304   | 6010     | 47.654   | 858      | 41.492   |
| mn        | 3038     | 32.88575 | 3704.25  | 42.67075 | 1781     | 40.6645  |
| sd        | 752.5357 | 2.839335 | 2120.652 | 4.991842 | 778.4596 | 4.259079 |
|           | 942      | 5.6263   | 1378     | 6.9666   | 553      | 4.34     |
|           | 1024     | 5.0781   | 2860     | 7.2378   | 490      | 11.224   |
|           | 1416     | 1.2712   | 1363     | 5.2825   | 704      | 7.2443   |
|           | 1842     | 5.1031   | 4586     | 17.074   | 1662     | 8.6643   |
| mn        | 1306     | 4.269675 | 2546.75  | 9.140225 | 852.25   | 7.86815  |
| sd        | 412.8825 | 2.014897 | 1530.131 | 5.359437 | 547.2503 | 2.871272 |
| 3posSD    |          | 8.518004 |          | 14.97553 |          | 12.77724 |
| 3negSD    |          | 6.044692 |          | 16.07831 |          | 8.613817 |
| Sum3SD    |          | 14.5627  |          | 31.05384 |          | 21.39105 |
| MnDiff    |          | 28.61608 |          | 33.53053 |          | 32.79635 |
| SumovrMn  |          | 0.508899 |          | 0.926136 |          | 0.652239 |
| 1minus    |          | 0.491101 |          | 0.073864 |          | 0.347761 |
|           | 2254     | 13.088   | 2340     | 18.077   | 2824     | 9.136    |
|           | 1560     | 11.218   | 1992     | 18.524   | 2314     | 16.206   |
|           | 6150     | 25.431   | 6454     | 23.35    | 5130     | 24.503   |
|           | 4312     | 20.942   | 6849     | 29.055   | 6285     | 23.548   |
| PLK1 SMAR | 182      | 34.066   | 280      | 21.429   | 196      | 16.837   |
| PLK1 SMAR | 139      | 32.374   | 194      | 23.711   | 110      | 39.091   |





Y

Y



Y

Y

X debris a,b

X debris a,b  
X debris a,b  
X debris a,b  
debris a,b

X debris a,b

x toxic a,b,c  
debris a,b

X toxic a

X debris a,b



0.040625

|           |                        |                 | cell ct | % inf  | AD     |
|-----------|------------------------|-----------------|---------|--------|--------|
| 50065 A02 | M-012929- ankyrin rep  | 79754 ASB13     | 3221    | 13.443 | 2.965  |
| 50065 A04 | M-009638- zinc finger, | 79752 ZFAND1    | 1838    | 5.6583 | 4.8197 |
| 50065 A05 | M-014337- zinc finger  | 79177 ZNF576    | 2664    | 8.0706 | 2.4074 |
| 50065 A06 | M-007482- solute carri | 79751 SLC25A22  | 4025    | 9.0683 | 1.4097 |
| 50065 A07 | M-030272- thiamine tr  | 79178 THTPA     | 2728    | 6.9648 | 3.5132 |
| 50065 A08 | M-014416- zinc finger  | 79750 ZNF659    | 2004    | 12.126 | 1.648  |
| 50065 A09 | M-016335- EF-hand do   | 79180 EFHD2     | 1118    | 11.896 | 1.418  |
| 50065 A10 | M-013977- lectin, man  | 79748 LMAN1L    | 2075    | 5.7349 | 4.7431 |
| 50065 A11 | M-014340- chromoson    | 79183 C20orf121 | 1511    | 12.177 | 1.699  |
| 50065 A12 | M-018412- enoyl Coen   | 79746 ECHDC3    | 1941    | 10.046 | 0.432  |
| 50065 A13 | M-005798- BRCA1/BRC    | 79184 BRCC3     | 1913    | 8.5729 | 1.9051 |
| 50065 A14 | M-018986- CAP-GLY dc   | 79745 CLIP4     | 1443    | 10.326 | 0.152  |
| 50065 A15 | M-014341- fibronectin  | 79187 FSD1      | 2237    | 9.4323 | 1.0457 |
| 50065 A16 | M-016550- zinc finger  | 79744 ZNF419    | 1882    | 6.2168 | 4.2612 |
| 50065 A17 | M-014342- transmemk    | 79188 TMEM43    | 2440    | 7.0902 | 3.3878 |
| 50065 A18 | M-014414- chromoson    | 79742 CXorf36   | 2642    | 15.897 | 5.419  |
| 50065 A19 | M-022561- iroquois hc  | 79190 IRX6      | 1184    | 10.135 | 0.343  |
| 50065 A20 | M-014413- chromoson    | 79741 C10orf68  | 1275    | 7.9216 | 2.5564 |
| 50065 A21 | M-022559- iroquois hc  | 79191 IRX3      | 2013    | 14.307 | 3.829  |
| 50065 A23 | M-024269- iroquois hc  | 79192 IRX1      | 1765    | 8.5552 | 1.9228 |
| 50065 B02 | M-014520- ankyrin rep  | 79998 ANKRD53   | 5373    | 12.377 | 1.899  |
| 50065 B04 | M-028493- ELOVL fami   | 79993 ELOVL7    | 4163    | 9.8727 | 0.6053 |
| 50065 B05 | M-014417- zinc finger  | 79755 ZNF750    | 4274    | 4.7964 | 5.6816 |
| 50065 B06 | M-014519- chromoson    | 79992 C6orf59   | 5170    | 8.2592 | 2.2188 |
| 50065 B07 | M-014418- dehydroge    | 79758 DHRS12    | 7165    | 9.7976 | 0.6804 |
| 50065 B08 | M-016208- oligonuclec  | 79991 OBFC1     | 5552    | 8.2493 | 2.2287 |
| 50065 B09 | M-015785- zinc finger  | 79759 ZNF668    | 6322    | 9.7754 | 0.7026 |
| 50065 B10 | M-014518- tetratricop  | 79989 TTC26     | 6323    | 12.921 | 2.443  |
| 50065 B11 | M-014419- gem (nucle   | 79760 GEMIN7    | 2578    | 11.365 | 0.887  |
| 50065 B12 | M-014517- zinc finger  | 79986 ZNF702    | 3539    | 9.579  | 0.899  |
| 50065 B13 | M-018392- chromoson    | 79762 C1orf115  | 4443    | 7.2699 | 3.2081 |
| 50065 B14 | M-008936- esterase 31  | 79984 FLJ21736  | 5423    | 8.3717 | 2.1063 |
| 50065 B15 | M-014420- isochorism.  | 79763 ISOC2     | 3669    | 9.8392 | 0.6388 |
| 50065 B16 | M-016605- premature    | 79983 POF1B     | 3657    | 8.6136 | 1.8644 |
| 50065 B17 | M-012935- immune as    | 79765 hIAN2     | 3798    | 6.0295 | 4.4485 |
| 50065 B18 | M-018817- DnaJ (Hsp4   | 79982 DNAJB14   | 6567    | 11.801 | 1.323  |
| 50065 B19 | M-012936- engulfmen    | 79767 ELMO3     | 5698    | 16.725 | 6.247  |
| 50065 B20 | M-015843- FERM dom     | 79981 FRMD1     | 4745    | 6.7861 | 3.6919 |
| 50065 B21 | M-014421- chromoson    | 79768 C15orf29  | 4385    | 10.559 | 0.081  |
| 50065 B23 | M-016546- chromoson    | 79770 C5orf14   | 2323    | 6.1558 | 4.3222 |
| 50065 C02 | M-014412- hypothetic   | 79740 FLJ23049  | 1887    | 6.2003 | 4.2777 |
| 50065 C04 | M-018159- tubulin tyrc | 79739 TTLL7     | 3544    | 5.5869 | 4.8911 |
| 50065 C05 | M-018424- THO compl    | 79228 THOC6     | 2849    | 6.669  | 3.809  |
| 50065 C06 | M-018158- Bardet-Bier  | 79738 BBS10     | 3444    | 8.072  | 2.406  |
| 50065 C07 | M-014343- zinc finger  | 79230 ZNF557    | 4442    | 13.823 | 3.345  |
| 50065 C08 | M-014410- chromoson    | 79736 C17orf42  | 4183    | 12.814 | 2.336  |

|           |                        |                |      |        |        |
|-----------|------------------------|----------------|------|--------|--------|
| 50065 C09 | M-005950- membrane     | 79258 MMEL1    | 2412 | 6.0945 | 4.3835 |
| 50065 C10 | M-014409- TBC1 doma    | 79735 TBC1D17  | 2143 | 16.659 | 6.181  |
| 50065 C11 | M-014344- WD repeat    | 79269 WDR32    | 3627 | 9.3466 | 1.1314 |
| 50065 C12 | M-014408- potassium    | 79734 KCTD17   | 2274 | 4.4855 | 5.9925 |
| 50065 C13 | M-029683- olfactory re | 79290 OR13A1   | 2709 | 8.5271 | 1.9509 |
| 50065 C14 | M-014407- E2F transcr  | 79733 E2F8     | 2458 | 11.473 | 0.995  |
| 50065 C15 | M-014668- chromosom    | 79363 C1orf89  | 1940 | 7.4742 | 3.0038 |
| 50065 C16 | M-015892- asparaginy   | 79731 NARS2    | 3460 | 13.931 | 3.453  |
| 50065 C17 | M-023561- ZXD family   | 79364 ZXDC     | 3070 | 6.1564 | 4.3216 |
| 50065 C18 | M-018156- NOL1/NOP     | 79730 NSUN7    | 3860 | 13.782 | 3.304  |
| 50065 C19 | M-010043- basic helix- | 79365 BHLHB3   | 4443 | 8.9354 | 1.5426 |
| 50065 C20 | M-016447- chromosom    | 79729 C1orf113 | 3247 | 6.4059 | 4.0721 |
| 50065 C21 | M-014649- nucleosom    | 79366 NSBP1    | 2211 | 11.171 | 0.693  |
| 50065 C23 | M-013441- UDP-GlcNA    | 79369 B3GNT4   | 1882 | 4.6759 | 5.8021 |
| 50065 D02 | M-018397- DSN1, MIN    | 79980 DSN1     | 3859 | 8.9401 | 1.5379 |
| 50065 D04 | M-018705- chromosom    | 79979 CXorf34  | 2215 | 18.014 | 7.536  |
| 50065 D05 | M-016557- multiple C2  | 79772 MCTP1    | 2904 | 13.085 | 2.607  |
| 50065 D06 | M-014515- grainyhead   | 79977 GRHL2    | 4048 | 13.908 | 3.43   |
| 50065 D07 | M-014422- growth hor   | 79774 GRTP1    | 3750 | 8.64   | 1.838  |
| 50065 D08 | M-018816- hypothetic   | 79974 FLJ21986 | 2916 | 7.0645 | 3.4135 |
| 50065 D09 | M-018835- zinc finger  | 79776 ZFHX4    | 3266 | 7.3791 | 3.0989 |
| 50065 D10 | M-014513- zinc finger  | 79973 ZNF442   | 2264 | 6.1396 | 4.3384 |
| 50065 D11 | M-014425- MICAL-like   | 79778 MICALL2  | 3055 | 10.704 | 0.226  |
| 50065 D12 | M-018728- G protein-c  | 79971 GPR177   | 3527 | 18.968 | 8.49   |
| 50065 D13 | M-015438- coiled-coil  | 79780 CCDC82   | 2880 | 10.66  | 0.182  |
| 50065 D14 | M-014511- zinc finger  | 79970 ZNF767   | 3545 | 5.7264 | 4.7516 |
| 50065 D15 | M-016563- IQ motif co  | 79781 IQCA     | 2856 | 13.27  | 2.792  |
| 50065 D16 | M-014510- chromosom    | 79969 C6orf134 | 3740 | 11.765 | 1.287  |
| 50065 D17 | M-014426- leucine ric  | 79782 LRRC31   | 3079 | 13.381 | 2.903  |
| 50065 D18 | M-008416- stearyl-Cc   | 79966 SCD5     | 2419 | 6.9037 | 3.5743 |
| 50065 D19 | M-014427- chromosom    | 79783 C7orf10  | 4119 | 16.436 | 5.958  |
| 50065 D20 | M-022728- hypothetic   | 79964 FLJ23529 | 3285 | 10.624 | 0.146  |
| 50065 D21 | M-027149- myosin, he   | 79784 MYH14    | 1560 | 7.6282 | 2.8498 |
| 50065 D23 | M-009772- hypothetic   | 79785 FLJ22655 | 2318 | 4.4435 | 6.0345 |
| 50065 E02 | M-012928- partner an   | 79728 PALB2    | 2793 | 6.8743 | 3.6037 |
| 50065 E04 | M-018411- lin-28 hom   | 79727 LIN28    | 3525 | 10.922 | 0.444  |
| 50065 E05 | M-016384- galactosida  | 79411 GLB1L    | 3789 | 7.4426 | 3.0354 |
| 50065 E06 | M-022683- WD repeat    | 79726 WDR59    | 2330 | 7.4678 | 3.0102 |
| 50065 E07 | M-014347- zinc finger, | 79413 ZBED2    | 4787 | 15.751 | 5.273  |
| 50065 E08 | M-021453- THAP doma    | 79725 THAP9    | 3534 | 20.43  | 9.952  |
| 50065 E09 | M-014348- leucine ric  | 79414 LRFN3    | 2055 | 14.696 | 4.218  |
| 50065 E10 | M-016138- zinc finger  | 79724 ZNF768   | 3022 | 7.1476 | 3.3304 |
| 50065 E11 | M-016389- chromosom    | 79415 C17orf62 | 2769 | 8.7757 | 1.7023 |
| 50065 E12 | M-014406- ankyrin rep  | 79722 ANKRD55  | 3617 | 9.3448 | 1.1332 |
| 50065 E13 | M-018131- chromosom    | 79441 C4orf15  | 3429 | 16.273 | 5.795  |
| 50065 E14 | M-014404- vacuolar pr  | 79720 VPS37B   | 2211 | 8.2768 | 2.2012 |
| 50065 E15 | M-014349- leucine ric  | 79442 LRRC2    | 3431 | 9.5307 | 0.9473 |

|           |                       |                 |      |        |        |
|-----------|-----------------------|-----------------|------|--------|--------|
| 50065 E16 | M-015891- hypothetic  | 79719 FLJ11506  | 3269 | 12.022 | 1.544  |
| 50065 E17 | M-014350- FYVE and c  | 79443 FYCO1     | 3947 | 6.5619 | 3.9161 |
| 50065 E18 | M-012927- transducin  | 79718 TBL1XR1   | 5409 | 10.723 | 0.245  |
| 50065 E19 | M-014352- WD repeat   | 79446 WDR25     | 2960 | 7.7703 | 2.7077 |
| 50065 E20 | M-014403- phosphopa   | 79717 PPCS      | 3715 | 7.8062 | 2.6718 |
| 50065 E21 | M-003991- chromoson   | 79447 C16orf53  | 4291 | 6.0126 | 4.4654 |
| 50065 E23 | M-014353- UL16 bindi  | 79465 ULBP3     | 2138 | 5.145  | 5.333  |
| 50065 F02 | M-014508- ATP-bindin  | 79963 ABCA11    | 1500 | 7.1333 | 3.3447 |
| 50065 F04 | M-014507- hypothetic  | 79962 FLJ13236  | 2492 | 9.3098 | 1.1682 |
| 50065 F05 | M-018393- chromoson   | 79786 C16orf44  | 3820 | 14.241 | 3.763  |
| 50065 F06 | M-016580- DENN/MAI    | 79961 DENND2D   | 2866 | 13.294 | 2.816  |
| 50065 F07 | M-017131- calmin (cal | 79789 CLMN      | 5750 | 6.5739 | 3.9041 |
| 50065 F08 | M-017133- PHD finger  | 79960 PHF17     | 2959 | 10.341 | 0.137  |
| 50065 F09 | M-014429- chromoson   | 79794 C12orf49  | 3166 | 8.844  | 1.634  |
| 50065 F10 | M-016487- centrosom   | 79959 CEP76     | 3140 | 10.478 | 0      |
| 50065 F11 | M-014430- asparagine  | 79796 ALG9      | 2663 | 11.528 | 1.05   |
| 50065 F12 | M-014506- DENN/MAI    | 79958 DENND1C   | 2692 | 8.2838 | 2.1942 |
| 50065 F13 | M-007064- zinc finger | 79797 ZNF408    | 2417 | 11.129 | 0.651  |
| 50065 F14 | M-008054- progestin a | 79957 PAQR6     | 4294 | 10.852 | 0.374  |
| 50065 F15 | M-003999- armadillo r | 79798 ARMC5     | 3162 | 8.697  | 1.781  |
| 50065 F16 | M-005876- KIAA1815    | 79956 KIAA1815  | 3186 | 10.013 | 0.465  |
| 50065 F17 | M-014431- UDP glucur  | 79799 UGT2A3    | 4066 | 7.0093 | 3.4687 |
| 50065 F18 | M-015882- PDZ domai   | 79955 PDZD7     | 5212 | 7.5403 | 2.9377 |
| 50065 F19 | M-016781- SHC SH2-dc  | 79801 SHCBP1    | 3358 | 12.061 | 1.583  |
| 50065 F20 | M-014505- nucleolar p | 79954 NOL10     | 3372 | 6.465  | 4.013  |
| 50065 F21 | M-016570- KIAA1822-l  | 79802 KIAA1822L | 4681 | 6.5798 | 3.8982 |
| 50065 F23 | M-018929- vasohibin 2 | 79805 VASH2     | 2238 | 6.9705 | 3.5075 |
| 50065 G02 | M-005978- aminopept   | 79716 NPEPL1    | 1408 | 13.21  | 2.732  |
| 50065 G04 | M-016444- coiled-coil | 79714 CCDC51    | 1942 | 10.35  | 0.128  |
| 50065 G05 | M-014354- family with | 79567 FAM65A    | 1940 | 7.1649 | 3.3131 |
| 50065 G06 | M-014401- transmemk   | 79713 TMEM149   | 1397 | 9.4488 | 1.0292 |
| 50065 G07 | M-014355- chromoson   | 79568 C2orf47   | 2424 | 28.837 | 18.359 |
| 50065 G08 | M-014400- glycosyltra | 79712 GTDC1     | 2373 | 10.24  | 0.238  |
| 50065 G09 | M-014356- family with | 79570 FAM77C    | 1929 | 10.835 | 0.357  |
| 50065 G10 | M-009516- importin 4  | 79711 IPO4      | 1567 | 9.381  | 1.097  |
| 50065 G11 | M-017478- GRIP and c  | 79571 GCC1      | 3673 | 10.373 | 0.105  |
| 50065 G12 | M-016180- MORC fam    | 79710 MORC4     | 3655 | 13.297 | 2.819  |
| 50065 G13 | M-018132- tetratricop | 79573 TTC13     | 1475 | 14.373 | 3.895  |
| 50065 G14 | M-018152- glycosyltra | 79709 GLT25D1   | 4211 | 10.805 | 0.327  |
| 50065 G15 | M-012913- EPS8-like 3 | 79574 EPS8L3    | 2735 | 16.673 | 6.195  |
| 50065 G16 | M-019418- nucleolar p | 79707 NOL9      | 3361 | 9.2532 | 1.2248 |
| 50065 G17 | M-014357- NF-kappaB   | 79576 NKAP      | 2462 | 8.7327 | 1.7453 |
| 50065 G18 | M-014399- PRKR inter  | 79706 PRKRIP1   | 3174 | 8.8217 | 1.6563 |
| 50065 G19 | M-016914- sperm asso  | 79582 SPAG16    | 4402 | 8.5416 | 1.9364 |
| 50065 G20 | M-018410- chromoson   | 79703 C11orf80  | 2841 | 6.371  | 4.107  |
| 50065 G21 | M-014360- hypothetic  | 79584 FLJ12684  | 1690 | 6.568  | 3.91   |
| 50065 G23 | M-014361- coronin 7   | 79585 CORO7     | 1678 | 8.4029 | 2.0751 |

|                  |                              |                      |             |               |               |
|------------------|------------------------------|----------------------|-------------|---------------|---------------|
| 50065 H02        | M-014504- chromoson          | 79953 C20orf39       | 2035        | 21.13         | 10.652        |
| 50065 H04        | M-014502- hypothetic         | 79951 FLJ11783       | 2973        | 16.347        | 5.869         |
| 50065 H05        | M-014433- glutathione        | 79807 GSTCD          | 2330        | 15.279        | 4.801         |
| 50065 H06        | M-019417- chromoson          | 79949 C10orf81       | 1909        | 10.896        | 0.418         |
| 50065 H07        | M-021424- tetratricop        | 79809 TTC21B         | 3494        | 15.283        | 4.805         |
| 50065 H08        | M-010399- dehydrodo          | 79947 DHDDS          | 3580        | 12.263        | 1.785         |
| 50065 H09        | M-016139- pentatricop        | 79810 PTC2           | 1748        | 11.213        | 0.735         |
| 50065 H10        | M-014500- chromoson          | 79946 C10orf95       | 2108        | 18.359        | 7.881         |
| 50065 H11        | M-014434- SAFB-like, t       | 79811 SLTM           | 2325        | 12.989        | 2.511         |
| 50065 H12        | M-008130- L-2-hydrox         | 79944 L2HGDH         | 1784        | 15.695        | 5.217         |
| 50065 H13        | M-014435- multimerin         | 79812 MMRN2          | 2125        | 12.753        | 2.275         |
| 50065 H14        | M-014499- zinc finger        | 79943 ZNF696         | 2125        | 11.388        | 0.91          |
| 50065 H15        | M-007065- euchromat          | 79813 EHMT1          | 1872        | 10.31         | 0.168         |
| 50065 H16        | M-021284- chromoson          | 79940 C6orf155       | 2463        | 13.317        | 2.839         |
| 50065 H17        | M-014436- NIPA-like d        | 79815 NPAL2          | 3362        | 15.497        | 5.019         |
| 50065 H18        | M-007547- solute carri       | 79939 SLC35E1        | 2833        | 11.225        | 0.747         |
| 50065 H19        | M-014437- transducin-        | 79816 TLE6           | 1877        | 6.3932        | 4.0848        |
| 50065 H20        | M-014495- synaptopor         | 79933 SYNPO2L        | 2480        | 12.702        | 2.224         |
| 50065 H21        | M-018160- MOB1, Mp           | 79817 MOBKL2B        | 1449        | 11.732        | 1.254         |
| 50065 H23        | M-014438- zinc finger        | 79818 ZNF552         | 1364        | 10.704        | 0.226         |
| 50065 I02        | M-004273- hypothetic         | 79701 FLJ22222       | 3064        | 4.0144        | 6.4636        |
| 50065 I04        | M-021798- zyg-11 hor         | 79699 ZYG11B         | 2969        | 10.677        | 0.199         |
| <b>50065 I05</b> | <b>M-017704- chondroitir</b> | <b>79586 CHPF</b>    | <b>5247</b> | <b>21.86</b>  | <b>11.382</b> |
| 50065 I06        | M-014398- zinc finger,       | 79698 ZMAT4          | 5919        | 16.945        | 6.467         |
| 50065 I07        | M-014362- cysteinyl-tf       | 79587 CARS2          | 4067        | 11.384        | 0.906         |
| 50065 I08        | M-014397- chromoson          | 79697 C14orf169      | 3127        | 11.065        | 0.587         |
| 50065 I09        | M-007061- ring finger        | 79589 RNF128         | 3609        | 10.945        | 0.467         |
| 50065 I10        | M-031970- chromoson          | 79696 C14orf140      | 2782        | 13.767        | 3.289         |
| 50065 I11        | M-017442- mitochond          | 79590 MRPL24         | 2436        | 12.356        | 1.878         |
| <b>50065 I12</b> | <b>M-016429- UDP-N-ace</b>   | <b>79695 GALNT12</b> | <b>3791</b> | <b>20.232</b> | <b>9.754</b>  |
| 50065 I13        | M-014363- chromoson          | 79591 C10orf76       | 3770        | 12.467        | 1.989         |
| 50065 I14        | M-014396- mannosida          | 79694 MANEA          | 2647        | 12.996        | 2.518         |
| 50065 I15        | M-007062- chromoson          | 79594 C1orf166       | 3212        | 10.679        | 0.201         |
| 50065 I16        | M-018139- yrdC doma          | 79693 YRDC           | 3429        | 15.281        | 4.803         |
| 50065 I17        | M-017129- Sin3A-asso         | 79595 SAP130         | 2706        | 14.893        | 4.415         |
| 50065 I18        | M-014395- zinc finger        | 79692 ZNF322A        | 2066        | 7.7928        | 2.6852        |
| 50065 I19        | M-016380- chromoson          | 79596 C13orf7        | 3942        | 13.115        | 2.637         |
| 50065 I20        | M-018409- queuine tR         | 79691 QTRTD1         | 3760        | 6.5957        | 3.8823        |
| 50065 I21        | M-018133- leucine-ric        | 79598 LRR1Q2         | 3235        | 5.6569        | 4.8211        |
| 50065 I23        | M-018660- tectonic 1         | 79600 TECT1          | 3772        | 7.3701        | 3.1079        |
| 50065 J02        | M-010672- KIAA0319-l         | 79932 KIAA0319L      | 3809        | 14.781        | 4.303         |
| 50065 J04        | M-016578- TNFAIP3 in         | 79931 TNIP3          | 1941        | 11.901        | 1.423         |
| 50065 J05        | M-019275- WD repeat          | 79819 WDR78          | 3354        | 15.802        | 5.324         |
| 50065 J06        | M-014494- docking pro        | 79930 DOK3           | 3643        | 12.407        | 1.929         |
| 50065 J07        | M-021281- chromoson          | 79820 C14orf161      | 4197        | 7.3862        | 3.0918        |
| 50065 J08        | M-014493- MAP6 dom           | 79929 MAP6D1         | 3319        | 9.5812        | 0.8968        |
| 50065 J09        | M-014439- chromoson          | 79823 C2orf34        | 4242        | 6.5299        | 3.9481        |



|           |                         |                 |      |        |        |
|-----------|-------------------------|-----------------|------|--------|--------|
| 50065 J10 | M-014492- glycine/arg   | 79927 GRRP1     | 3328 | 6.3702 | 4.1078 |
| 50065 J11 | M-014440- coiled-coil   | 79825 CCDC48    | 4654 | 22.583 | 12.105 |
| 50065 J12 | M-014491- hypothetic    | 79926 FLJ14124  | 4532 | 6.6417 | 3.8363 |
| 50065 J13 | M-010734- adipocyte-s   | 79827 ASAM      | 4824 | 8.8516 | 1.6264 |
| 50065 J14 | M-028510- KPL2 prote    | 79925 FLJ23577  | 4051 | 10.738 | 0.26   |
| 50065 J15 | M-014442- methyltran    | 79828 METTL8    | 3798 | 13.77  | 3.292  |
| 50065 J16 | M-018396- mitochond     | 79922 MRM1      | 3280 | 6.0061 | 4.4719 |
| 50065 J17 | M-014443- N-acetyltra   | 79829 NAT11     | 2584 | 6.2693 | 4.2087 |
| 50065 J18 | M-016799- transcrip     | 79921 TCEAL4    | 5106 | 12.848 | 2.37   |
| 50065 J19 | M-007066- zinc finger,  | 79830 ZMYM1     | 4343 | 9.6247 | 0.8533 |
| 50065 J20 | M-014487- chromoson     | 79919 C2orf54   | 2869 | 6.3437 | 4.1343 |
| 50065 J21 | M-003983- jumonji do    | 79831 JMJD5     | 1976 | 7.1862 | 3.2918 |
| 50065 J23 | M-015243- gem (nucle    | 79833 GEMIN6    | 2728 | 5.6452 | 4.8328 |
| 50065 K02 | M-018699- galactose-3   | 79690 GAL3ST4   | 2006 | 15.354 | 4.876  |
| 50065 K04 | M-014394- STEAP fami    | 79689 STEAP4    | 2255 | 18.492 | 8.014  |
| 50065 K05 | M-014364- LAG1 homc     | 79603 LASS4     | 3639 | 12.888 | 2.41   |
| 50065 K06 | M-016135- chromoson     | 79686 C14orf139 | 2036 | 11.002 | 0.524  |
| 50065 K07 | M-017594- piggyBac tr   | 79605 PGBD5     | 5547 | 13.196 | 2.718  |
| 50065 K08 | M-014392- chromoson     | 79684 C11orf61  | 3346 | 13.987 | 3.509  |
| 50065 K09 | M-014365- family with   | 79607 FAM118B   | 4187 | 15.524 | 5.046  |
| 50065 K10 | M-016703- zinc finger,  | 79683 ZDHHC14   | 3448 | 16.85  | 6.372  |
| 50065 K11 | M-016185- resistance t  | 79608 RIC3      | 3188 | 16.593 | 6.115  |
| 50065 K12 | M-016338- chromoson     | 79680 C22orf29  | 1720 | 12.965 | 2.487  |
| 50065 K13 | M-014366- chromoson     | 79609 C14orf138 | 2035 | 12.629 | 2.151  |
| 50065 K14 | M-007814- V-set doma    | 79679 VTCN1     | 3254 | 16.749 | 6.271  |
| 50065 K15 | M-009760- FLJ21963 p    | 79611 FLJ21963  | 4780 | 14.603 | 4.125  |
| 50065 K16 | M-018408- structural r  | 79677 SMC6      | 6197 | 11.376 | 0.898  |
| 50065 K17 | M-013336- NMDA rece     | 79612 NARG1L    | 4303 | 15.663 | 5.185  |
| 50065 K18 | M-004279- 2-oxogluta    | 79676 OGFOD2    | 4175 | 7.2575 | 3.2205 |
| 50065 K19 | M-018425- chromoson     | 79614 C5orf23   | 5061 | 16.696 | 6.218  |
| 50065 K20 | M-017130- FAST kinase   | 79675 FASTKD1   | 4091 | 14.422 | 3.944  |
| 50065 K21 | M-015658- cyclin J-like | 79616 CCNJL     | 4377 | 13.388 | 2.91   |
| 50065 K23 | M-014367- homeobox      | 79618 HMBOX1    | 3201 | 15.589 | 5.111  |
| 50065 L02 | M-014486- SET domair    | 79918 SETD6     | 4157 | 19.75  | 9.272  |
| 50065 L04 | M-014485- MAGI famil    | 79917 MAGIX     | 2860 | 23.881 | 13.403 |
| 50065 L05 | M-005339- NKF3 kinas    | 79834 SGK269    | 4515 | 22.99  | 12.512 |
| 50065 L06 | M-004738- ATPase fan    | 79915 ATAD5     | 4338 | 20.701 | 10.223 |
| 50065 L07 | M-007067- LON peptid    | 79836 LONRF3    | 2849 | 21.411 | 10.933 |
| 50065 L08 | M-008132- hypothetic    | 79912 FLJ22028  | 4175 | 23.88  | 13.402 |
| 50065 L09 | M-019436- transmemk     | 79838 TMC5      | 5479 | 19.474 | 8.996  |
| 50065 L10 | M-014483- butyrophili   | 79908 BTNL8     | 4552 | 20.562 | 10.084 |
| 50065 L11 | M-014445- coiled-coil   | 79839 CCDC102B  | 2645 | 15.879 | 5.401  |
| 50065 L12 | M-014481- MORN repr     | 79906 MORN1     | 3280 | 16.006 | 5.528  |
| 50065 L13 | M-014446- nonhomok      | 79840 NHEJ1     | 3431 | 14.631 | 4.153  |
| 50065 L14 | M-019479- transmemk     | 79905 TMC7      | 2371 | 14.551 | 4.073  |
| 50065 L15 | M-012937- ATP/GTP bi    | 79841 AGLB2     | 3028 | 16.083 | 5.605  |
| 50065 L16 | M-014479- hypothetic    | 79903 FLJ14154  | 1656 | 21.316 | 10.838 |

|           |                                   |                 |      |        |        |
|-----------|-----------------------------------|-----------------|------|--------|--------|
| 50065 L17 | M-016482- zinc finger             | 79842 ZBTB3     | 1916 | 15.501 | 5.023  |
| 50065 L18 | M-014478- nucleoporin             | 79902 NUP85     | 4397 | 11.963 | 1.485  |
| 50065 L19 | M-018394- family with             | 79843 FAM124B   | 4102 | 17.504 | 7.026  |
| 50065 L20 | M-017132- cytochrome              | 79901 CYBRD1    | 3878 | 17.818 | 7.34   |
| 50065 L21 | M-014447- zinc finger,            | 79844 ZDHHC11   | 1805 | 21.884 | 11.406 |
| 50065 L23 | M-007068- ring finger             | 79845 RNF122    | 2076 | 17.726 | 7.248  |
| 50065 M02 | M-014390- ventricular             | 79674 VEPH1     | 2264 | 4.1519 | 6.3261 |
| 50065 M04 | M-007063- zinc finger             | 79673 ZNF329    | 3058 | 6.4421 | 4.0359 |
| 50065 M05 | M-014369- ribonucleas             | 79621 RNASEH2B  | 3772 | 13.176 | 2.698  |
| 50065 M06 | M-012926- NLR family              | 79671 NLRX1     | 3620 | 7.9834 | 2.4946 |
| 50065 M07 | M-014370- chromosom               | 79622 C16orf33  | 2533 | 9.6328 | 0.8452 |
| 50065 M08 | M-026009- zinc finger,            | 79670 ZCCHC6    | 2777 | 4.9694 | 5.5086 |
| 50065 M09 | M-014371- UDP-N-ace               | 79623 GALNT14   | 3265 | 17.703 | 7.225  |
| 50065 M10 | M-014389- chromosom               | 79669 C3orf52   | 2660 | 7.8571 | 2.6209 |
| 50065 M11 | M-014372- chromosom               | 79624 C6orf211  | 2815 | 12.398 | 1.92   |
| 50065 M12 | M-015784- poly (ADP-r             | 79668 PARP8     | 2901 | 8.1351 | 2.3429 |
| 50065 M13 | M-016438- chromosom               | 79625 C4orf31   | 1554 | 5.3411 | 5.1369 |
| 50065 M14 | M-014388- hypothetic              | 79667 FLJ13197  | 2303 | 5.3409 | 5.1371 |
| 50065 M15 | M-014373- tumor necr              | 79626 TNFAIP8L2 | 3327 | 11.061 | 0.583  |
| 50065 M16 | M-018407- pleckstrin f            | 79666 PLEKHF2   | 2995 | 11.786 | 1.308  |
| 50065 M17 | M-018134- opioid grov             | 79627 OGFRL1    | 3752 | 13.14  | 2.662  |
| 50065 M18 | M-018727- DEAH (Asp-              | 79665 DHX40     | 1975 | 4.557  | 5.921  |
| 50065 M19 | M-024332- SH3 domai               | 79628 SH3TC2    | 2459 | 8.4587 | 2.0193 |
| 50065 M20 | M-004287- HSPB (heat              | 79663 HSPBAP1   | 3329 | 5.7375 | 4.7405 |
| 50065 M21 | M-004343- occludin/EI             | 79629 OCEL1     | 2968 | 7.5809 | 2.8971 |
| 50065 M23 | M-014374- chromosom               | 79630 C1orf54   | 3929 | 7.6355 | 2.8425 |
| 50065 N02 | M-014477- hypothetic              | 79899 FLJ14213  | 2488 | 18.368 | 7.89   |
| 50065 N04 | M-016574- zinc finger             | 79898 ZNF613    | 3052 | 14.318 | 3.84   |
| 50065 N05 | M-019110- hypothetic              | 79846 FLJ21062  | 3520 | 21.222 | 10.744 |
| 50065 N06 | M-014476- ribonuclea              | 79897 RPP21     | 3381 | 16.415 | 5.937  |
| 50065 N07 | M-026283- transmemk               | 79847 TMEM180   | 4042 | 12.865 | 2.387  |
| 50065 N08 | M-030400- ATPase, Cl <sub>2</sub> | 79895 ATP8B4    | 2901 | 10.789 | 0.311  |
| 50065 N09 | M-016485- centrosom               | 79848 CSPP1     | 2273 | 12.89  | 2.412  |
| 50065 N10 | M-007070- zinc finger             | 79894 ZNF672    | 1885 | 11.777 | 1.299  |
| 50065 N11 | M-017027- PDZ domai               | 79849 PDZD3     | 2321 | 9.3494 | 1.1286 |
| 50065 N12 | M-014475- zinc finger             | 79893 ZNF403    | 2391 | 5.9389 | 4.5391 |
| 50065 N13 | M-014448- family with             | 79850 FAM57A    | 3387 | 16.268 | 5.79   |
| 50065 N14 | M-014474- chromosom               | 79892 C10orf119 | 3319 | 11.992 | 1.514  |
| 50065 N15 | M-014450- transmemk               | 79853 TM4SF20   | 2553 | 7.3639 | 3.1141 |
| 50065 N16 | M-014473- zinc finger             | 79891 ZNF671    | 2348 | 5.6644 | 4.8136 |
| 50065 N17 | M-014451- hypothetic              | 79854 FLJ22639  | 2891 | 6.4338 | 4.0442 |
| 50065 N18 | M-014503- Ras and Ra              | 79890 RIN3      | 3031 | 16.1   | 5.622  |
| 50065 N19 | M-014452- sorting nex             | 79856 SNX22     | 3635 | 5.7772 | 4.7008 |
| 50065 N20 | M-014472- hypothetic              | 79887 FLJ22662  | 2568 | 7.243  | 3.235  |
| 50065 N21 | M-031086- hypothetic              | 79860 FLJ21369  | 3339 | 7.8766 | 2.6014 |
| 50065 N23 | M-009010- tubulin, alp            | 79861 TUBAL3    | 4702 | 5.806  | 4.672  |
| 50065 O02 | M-026503- dynein, cyt             | 79659 DYNC2H1   | 2813 | 16.175 | 5.697  |

|           |                        |                 |      |        |          |
|-----------|------------------------|-----------------|------|--------|----------|
| 50065 O04 | M-014385- hypothetical | 79657 FLJ21908  | 1332 | 11.486 | 1.008    |
| 50065 O05 | M-018426- elongation   | 79631 EFTUD1    | 1754 | 11.117 | 0.639    |
| 50065 O06 | M-014384- chromosom    | 79656 C1orf165  | 2075 | 11.181 | 0.703    |
| 50065 O07 | M-015782- chromosom    | 79632 C6orf60   | 4073 | 11.564 | 1.086    |
| 50065 O08 | M-027468- HECT doma    | 79654 HECTD3    | 3097 | 10.268 | 0.21     |
| 50065 O09 | M-014375- FAT tumor    | 79633 FAT4      | 3667 | 9.49   | 0.988    |
| 50065 O10 | M-014383- chromosom    | 79652 C16orf30  | 4120 | 13.301 | 2.823    |
| 50065 O11 | M-014376- secernin 3   | 79634 SCRN3     | 3634 | 14.557 | 4.079    |
| 50065 O12 | M-014382- chromosom    | 79650 C16orf57  | 1619 | 9.265  | 1.213    |
| 50065 O13 | M-014377- coiled-coil  | 79635 CCDC121   | 2799 | 8.9318 | 1.5462   |
| 50065 O14 | M-024948- MAP7 dom     | 79649 MAP7D3    | 2111 | 13.169 | 2.691    |
| 50065 O15 | M-014378- transmembr   | 79639 TMEM53    | 1871 | 9.0326 | 1.4454   |
| 50065 O16 | M-014381- chromosom    | 79647 C1orf108  | 2334 | 8.2262 | 2.2518   |
| 50065 O17 | M-015659- hypothetical | 79640 CTA-216E1 | 3975 | 3.5975 | 6.8805   |
| 50065 O18 | M-016476- EF-hand ca   | 79645 EFCAB1    | 2520 | 8.9683 | 1.5097   |
| 50065 O19 | M-014379- rogdi homc   | 79641 ROGDI     | 3393 | 15.031 | 4.553    |
| 50065 O20 | M-014380- steroid 5 al | 79644 SRD5A2L   | 3666 | 13.066 | 2.588    |
| 50065 O21 | M-009048- arylsulfatas | 79642 ARSJ      | 2666 | 7.7644 | 2.7136   |
| 50065 O23 | M-005060- chromatin    | 79643 CHMP6     | 2704 | 4.5118 | 5.9662   |
| 50065 P02 | M-014471- chromosom    | 79886 C9orf82   | 2321 | 7.9707 | 2.5073   |
| 50065 P04 | M-014470- microtubul   | 79884 MAP9      | 2398 | 10.008 | 0.47     |
| 50065 P05 | M-014454- zinc finger  | 79862 ZNF669    | 2184 | 12.958 | 2.48     |
| 50065 P06 | M-014469- podocan-lil  | 79883 PODNL1    | 1730 | 6.9942 | 3.4838   |
| 50065 P07 | M-014455- chromosom    | 79863 C18orf22  | 3137 | 7.2043 | 3.2737   |
| 50065 P08 | M-014468- zinc finger  | 79882 ZC3H14    | 2375 | 6.8632 | 3.6148   |
| 50065 P09 | M-014456- chromosom    | 79864 C11orf63  | 2172 | 7.1363 | 3.3417   |
| 50065 P10 | M-006806- dephospho    | 79877 DCAKD     | 1510 | 10.132 | 0.346    |
| 50065 P11 | M-014457- triggering r | 79865 TREML2    | 2236 | 4.2934 | 6.1846   |
| 50065 P12 | M-006405- ubiquitin-a  | 79876 UBE1DC1   | 1559 | 3.5279 | 6.9501   |
| 50065 P13 | M-014458- chromosom    | 79866 C13orf34  | 2010 | 5.1244 | 5.3536   |
| 50065 P14 | M-009001- rabaptin, R  | 79874 RABEP2    | 3681 | 12.225 | 1.747    |
| 50065 P15 | M-018161- chromosom    | 79867 C12orf38  | 2629 | 7.6455 | 2.8325   |
| 50065 P16 | M-014462- nudix (nucl  | 79873 NUDT18    | 3392 | 6.8986 | 3.5794   |
| 50065 P17 | M-014459- chromosom    | 79868 CXorf45   | 3766 | 5.5231 | 4.9549   |
| 50065 P18 | M-007069- Cas-Br-M (i  | 79872 CBLL1     | 2168 | 6.2731 | 4.2049   |
| 50065 P19 | M-015842- pre-mRNA     | 79869 FLJ12529  | 2707 | 6.6494 | 3.8286   |
| 50065 P20 | M-014461- chromosom    | 79871 C1orf82   | 1430 | 6.3636 | 4.1144   |
| 50065 P21 | M-014460- brain and a  | 79870 BAALC     | 1996 | 4.4088 | 6.0692   |
| 50065 P23 | M-009382- Rho GTPasi   | 79658 ARHGAP10  | 3021 | 10.89  | 0.412    |
|           |                        | MAD             |      | 10.478 | 3.0354   |
|           |                        | MAD3            |      |        | 9.1062   |
|           |                        | MADc            |      |        | 4.492392 |
| 50065 C22 | Human4 Pc RNAi         | empty           |      |        |          |
| 50065 D22 | Human4 Pc RNAi         | empty           |      |        |          |
| 50065 E22 | Human4 Pc RNAi         | empty           |      |        |          |
| 50065 F22 | Human4 Pc RNAi         | empty           |      |        |          |

|           |                |       |
|-----------|----------------|-------|
| 50065 G22 | Human4 Pc RNAi | empty |
| 50065 H22 | Human4 Pc RNAi | empty |
| 50065 I22 | Human4 Pc RNAi | empty |
| 50065 J22 | Human4 Pc RNAi | empty |

|           |                |                                                           |      |
|-----------|----------------|-----------------------------------------------------------|------|
| 50065 H03 | Human4 Pc RNAi | library cont Dharmacor M-003290- polo-like ki             | 5347 |
| 50065 I03 | Human4 Pc RNAi | library cont Dharmacor D-001206-: siControl non-targeting |      |
| 50065 J03 | Human4 Pc RNAi | library cont Dharmacor D-001206-: siControl non-targeting |      |
| 50065 K03 | Human4 Pc RNAi | library cont Dharmacor D-001600-( siGLO RISC-free siRNA   |      |
| 50065 K22 | Human4 Pc RNAi | empty                                                     |      |
| 50065 G03 | Human4 Pc RNAi | library cont Dharmacor M-003290- polo-like ki             | 5347 |

| rZ       | cell ct | % inf  | AD     | rZ       | cell ct | % inf  | AD     | rZ       |
|----------|---------|--------|--------|----------|---------|--------|--------|----------|
| 0.660005 | 4542    | 12.99  | 3.2727 | 0.823999 | 5385    | 19.536 | 9.745  | 2.352433 |
| -1.07286 | 2238    | 5.8534 | 3.8639 | -0.97285 | 3080    | 10.162 | 0.371  | 0.089559 |
| -0.53588 | 3597    | 6.1718 | 3.5455 | -0.89268 | 3325    | 7.1579 | 2.6331 | -0.63563 |
| -0.3138  | 4294    | 4.9837 | 4.7336 | -1.19182 | 4550    | 6.7253 | 3.0657 | -0.74006 |
| -0.78203 | 1755    | 6.0969 | 3.6204 | -0.91154 | 2017    | 8.5771 | 1.2139 | -0.29303 |
| 0.366842 | 2354    | 7.6466 | 2.0707 | -0.52136 | 2828    | 5.3041 | 4.4869 | -1.08313 |
| 0.315645 | 1174    | 5.707  | 4.0103 | -1.00971 | 1725    | 9.3333 | 0.4577 | -0.11049 |
| -1.05581 | 2431    | 8.1448 | 1.5725 | -0.39592 | 1983    | 7.9677 | 1.8233 | -0.44014 |
| 0.378195 | 1877    | 11.881 | 2.1637 | 0.544775 | 2222    | 9.0459 | 0.7451 | -0.17987 |
| -0.09616 | 2217    | 7.6229 | 2.0944 | -0.52733 | 1802    | 9.3785 | 0.4125 | -0.09958 |
| -0.42407 | 1632    | 6.6789 | 3.0384 | -0.76501 | 1929    | 7.1021 | 2.6889 | -0.6491  |
| -0.03383 | 2096    | 10.639 | 0.9217 | 0.232065 | 2526    | 8.3135 | 1.4775 | -0.35667 |
| -0.23277 | 2504    | 13.339 | 3.6217 | 0.91187  | 2962    | 4.7941 | 4.9969 | -1.20625 |
| -0.94854 | 3291    | 8.4169 | 1.3004 | -0.32741 | 2773    | 5.3372 | 4.4538 | -1.07514 |
| -0.75412 | 2312    | 6.7474 | 2.9699 | -0.74776 | 2432    | 4.6875 | 5.1035 | -1.23198 |
| 1.206262 | 4592    | 8.6672 | 1.0501 | -0.26439 | 2312    | 6.0554 | 3.7356 | -0.90177 |
| -0.07635 | 1479    | 8.1812 | 1.5361 | -0.38676 | 1529    | 11.707 | 1.916  | 0.46252  |
| -0.56905 | 1871    | 8.605  | 1.1123 | -0.28005 | 2925    | 4.7521 | 5.0389 | -1.21639 |
| 0.85233  | 2995    | 9.8164 | 0.0991 | 0.024951 | 2893    | 8.8835 | 0.9075 | -0.21907 |
| -0.42801 | 1092    | 8.4249 | 1.2924 | -0.3254  | 1981    | 4.7451 | 5.0459 | -1.21807 |
| 0.422715 | 4422    | 7.9376 | 1.7797 | -0.44809 | 3952    | 12.424 | 2.633  | 0.635603 |
| -0.13474 | 3229    | 11.799 | 2.0817 | 0.52413  | 2776    | 17.399 | 7.608  | 1.836563 |
| -1.26472 | 3252    | 10.055 | 0.3377 | 0.085026 | 3316    | 10.253 | 0.462  | 0.111526 |
| -0.4939  | 3372    | 8.274  | 1.4433 | -0.36339 | 2954    | 11.645 | 1.854  | 0.447554 |
| -0.15146 | 4515    | 8.7486 | 0.9687 | -0.2439  | 4157    | 13.159 | 3.368  | 0.813032 |
| -0.49611 | 4194    | 10.062 | 0.3447 | 0.086788 | 4409    | 9.6621 | 0.1289 | -0.03112 |
| -0.1564  | 3285    | 9.7717 | 0.0544 | 0.013697 | 3279    | 10.064 | 0.273  | 0.065902 |
| 0.543808 | 4803    | 12.492 | 2.7747 | 0.698613 | 4035    | 10.558 | 0.767  | 0.185153 |
| 0.197445 | 1687    | 13.456 | 3.7387 | 0.941328 | 3057    | 17.239 | 7.448  | 1.797939 |
| -0.20012 | 1358    | 12.003 | 2.2857 | 0.575493 | 3493    | 9.791  | 0      | 0        |
| -0.71412 | 2547    | 10.954 | 1.2367 | 0.311376 | 3137    | 8.5432 | 1.2478 | -0.30122 |
| -0.46886 | 2237    | 11.399 | 1.6817 | 0.423418 | 3652    | 7.7766 | 2.0144 | -0.48627 |
| -0.1422  | 1829    | 15.91  | 6.1927 | 1.559195 | 2726    | 11.445 | 1.654  | 0.399274 |
| -0.41501 | 2113    | 10.175 | 0.4577 | 0.11524  | 2996    | 13.852 | 4.061  | 0.980321 |
| -0.99023 | 2334    | 8.7404 | 0.9769 | -0.24596 | 3566    | 8.4969 | 1.2941 | -0.31239 |
| 0.294498 | 3579    | 15.731 | 6.0137 | 1.514127 | 4900    | 11.082 | 1.291  | 0.311646 |
| 1.390573 | 3409    | 12.232 | 2.5147 | 0.63315  | 4598    | 13.767 | 3.976  | 0.959802 |
| -0.82181 | 2082    | 10.663 | 0.9457 | 0.238108 | 4117    | 5.6352 | 4.1558 | -1.00321 |
| 0.01803  | 2391    | 10.456 | 0.7387 | 0.18599  | 3543    | 9.0601 | 0.7309 | -0.17644 |
| -0.96212 | 1015    | 15.369 | 5.6517 | 1.422983 | 2185    | 8.4668 | 1.3242 | -0.31966 |
| -0.95221 | 2071    | 5.1666 | 4.5507 | -1.14577 | 2070    | 6.6667 | 3.1243 | -0.7542  |
| -1.08875 | 1868    | 4.818  | 4.8993 | -1.23354 | 2939    | 5.3079 | 4.4831 | -1.08222 |
| -0.84788 | 2096    | 4.6756 | 5.0417 | -1.2694  | 1919    | 6.9307 | 2.8603 | -0.69047 |
| -0.53557 | 3143    | 5.5043 | 4.213  | -1.06075 | 3147    | 5.9739 | 3.8171 | -0.92144 |
| 0.744592 | 4388    | 8.7511 | 0.9662 | -0.24327 | 2921    | 14.105 | 4.314  | 1.041395 |
| 0.51999  | 2839    | 8.665  | 1.0523 | -0.26495 | 3037    | 11.854 | 2.063  | 0.498006 |

|          |      |        |        |          |      |        |        |          |
|----------|------|--------|--------|----------|------|--------|--------|----------|
| -0.97576 | 2179 | 8.1689 | 1.5484 | -0.38986 | 2378 | 9.4617 | 0.3293 | -0.07949 |
| 1.375882 | 2207 | 11.871 | 2.1537 | 0.542258 | 2365 | 14.884 | 5.093  | 1.229445 |
| -0.25185 | 3106 | 6.8577 | 2.8596 | -0.71999 | 2863 | 6.7761 | 3.0149 | -0.72779 |
| -1.33392 | 2141 | 5.1845 | 4.5328 | -1.14127 | 1930 | 4.4041 | 5.3869 | -1.30039 |
| -0.43427 | 1984 | 4.1331 | 5.5842 | -1.40599 | 2247 | 1.0681 | 8.7229 | -2.1057  |
| 0.221486 | 1530 | 9.8039 | 0.0866 | 0.021804 | 1722 | 10.918 | 1.127  | 0.272057 |
| -0.66864 | 2463 | 7.7954 | 1.9219 | -0.4839  | 2076 | 5.5395 | 4.2515 | -1.02631 |
| 0.768633 | 3793 | 13.288 | 3.5707 | 0.899029 | 2978 | 8.3613 | 1.4297 | -0.34513 |
| -0.96198 | 4112 | 7.6362 | 2.0811 | -0.52398 | 2984 | 5.6971 | 4.0939 | -0.98826 |
| 0.735466 | 3409 | 11.352 | 1.6347 | 0.411584 | 3678 | 8.8635 | 0.9275 | -0.2239  |
| -0.34338 | 4094 | 5.7645 | 3.9528 | -0.99523 | 4703 | 7.2507 | 2.5403 | -0.61323 |
| -0.90644 | 3369 | 5.8178 | 3.8995 | -0.98181 | 5080 | 6.1614 | 3.6296 | -0.87618 |
| 0.154261 | 2577 | 6.7132 | 3.0041 | -0.75637 | 2245 | 3.7416 | 6.0494 | -1.46032 |
| -1.29154 | 1837 | 5.2803 | 4.437  | -1.11715 | 2472 | 1.7395 | 8.0515 | -1.94362 |
| -0.34233 | 2424 | 10.644 | 0.9267 | 0.233324 | 2477 | 14.776 | 4.985  | 1.203374 |
| 1.677503 | 2965 | 13.794 | 4.0767 | 1.02643  | 1585 | 13.249 | 3.458  | 0.834758 |
| 0.580314 | 2434 | 14.503 | 4.7857 | 1.204942 | 1729 | 18.392 | 8.601  | 2.076272 |
| 0.763513 | 3684 | 10.722 | 1.0047 | 0.252963 | 2053 | 15.636 | 5.845  | 1.410977 |
| -0.40914 | 2598 | 8.622  | 1.0953 | -0.27577 | 1795 | 12.033 | 2.242  | 0.541216 |
| -0.75984 | 2453 | 13.29  | 3.5727 | 0.899533 | 2002 | 9.5904 | 0.2006 | -0.04842 |
| -0.68981 | 2380 | 9.0336 | 0.6837 | -0.17214 | 2333 | 10.716 | 0.925  | 0.223294 |
| -0.96572 | 2234 | 10.295 | 0.5777 | 0.145453 | 1316 | 12.462 | 2.671  | 0.644777 |
| 0.050307 | 3564 | 15.965 | 6.2477 | 1.573043 | 3449 | 15.541 | 5.75   | 1.388044 |
| 1.889862 | 1726 | 16.744 | 7.0267 | 1.76918  | 2967 | 9.8079 | 0.0169 | 0.00408  |
| 0.040513 | 1631 | 11.649 | 1.9317 | 0.486363 | 2603 | 9.5275 | 0.2635 | -0.06361 |
| -1.0577  | 2239 | 9.2452 | 0.4721 | -0.11887 | 2959 | 9.2937 | 0.4973 | -0.12005 |
| 0.621495 | 1840 | 14.511 | 4.7937 | 1.206956 | 1837 | 13.337 | 3.546  | 0.856001 |
| 0.286484 | 2566 | 15.549 | 5.8317 | 1.468303 | 3414 | 9.8418 | 0.0508 | 0.012263 |
| 0.646204 | 1913 | 8.1025 | 1.6148 | -0.40657 | 1775 | 8.7887 | 1.0023 | -0.24195 |
| -0.79563 | 1755 | 6.3818 | 3.3355 | -0.83981 | 1425 | 8.6316 | 1.1594 | -0.27988 |
| 1.326242 | 2758 | 13.017 | 3.2997 | 0.830797 | 2923 | 11.05  | 1.259  | 0.303921 |
| 0.032499 | 2185 | 5.9954 | 3.7219 | -0.9371  | 2212 | 6.8716 | 2.9194 | -0.70474 |
| -0.63436 | 1858 | 8.9343 | 0.783  | -0.19714 | 2219 | 6.1289 | 3.6621 | -0.88403 |
| -1.34327 | 1557 | 5.9088 | 3.8085 | -0.9589  | 2887 | 5.3689 | 4.4221 | -1.06749 |
| -0.80218 | 2213 | 8.3597 | 1.3576 | -0.34182 | 2073 | 4.438  | 5.353  | -1.29221 |
| 0.098834 | 2421 | 9.7893 | 0.072  | 0.018128 | 2020 | 13.564 | 3.773  | 0.910798 |
| -0.67568 | 2618 | 7.9068 | 1.8105 | -0.45585 | 1569 | 10.771 | 0.98   | 0.236571 |
| -0.67007 | 1198 | 3.3389 | 6.3784 | -1.60595 | 737  | 8.5482 | 1.2428 | -0.30001 |
| 1.173762 | 3282 | 6.9165 | 2.8008 | -0.70518 | 1795 | 11.365 | 1.574  | 0.379962 |
| 2.215301 | 2938 | 11.777 | 2.0597 | 0.51859  | 2178 | 18.044 | 8.253  | 1.992266 |
| 0.938921 | 1486 | 11.978 | 2.2607 | 0.569198 | 1012 | 15.02  | 5.229  | 1.262275 |
| -0.74134 | 2399 | 7.8366 | 1.8807 | -0.47352 | 1758 | 12.912 | 3.121  | 0.753406 |
| -0.37893 | 1931 | 5.8519 | 3.8654 | -0.97323 | 1211 | 5.8629 | 3.9281 | -0.94824 |
| -0.25225 | 1555 | 8.1029 | 1.6144 | -0.40647 | 1345 | 7.2119 | 2.5791 | -0.62259 |
| 1.289959 | 2187 | 6.7215 | 2.9958 | -0.75428 | 1963 | 11.819 | 2.028  | 0.489557 |
| -0.48998 | 1458 | 7.4074 | 2.3099 | -0.58159 | 853  | 7.7374 | 2.0536 | -0.49574 |
| -0.21087 | 2606 | 10.207 | 0.4897 | 0.123296 | 2478 | 9.6449 | 0.1461 | -0.03527 |

|          |      |        |         |          |      |        |        |          |
|----------|------|--------|---------|----------|------|--------|--------|----------|
| 0.343692 | 2838 | 8.1395 | 1.5778  | -0.39726 | 1514 | 8.2563 | 1.5347 | -0.37047 |
| -0.87172 | 2729 | 3.0048 | 6.7125  | -1.69007 | 1646 | 6.9866 | 2.8044 | -0.67698 |
| 0.054537 | 3478 | 7.7918 | 1.9255  | -0.4848  | 2774 | 10.238 | 0.447  | 0.107905 |
| -0.60273 | 1540 | 4.7403 | 4.977   | -1.25311 | 1314 | 12.1   | 2.309  | 0.55739  |
| -0.59474 | 1684 | 3.9192 | 5.7981  | -1.45984 | 1382 | 6.2952 | 3.4958 | -0.84388 |
| -0.99399 | 3259 | 4.1731 | 5.5442  | -1.39592 | 2454 | 8.476  | 1.315  | -0.31744 |
| -1.18712 | 1433 | 3.3496 | 6.3677  | -1.60326 | 1349 | 7.1905 | 2.6005 | -0.62776 |
| -0.74453 | 1997 | 9.364  | 0.3533  | -0.08895 | 2477 | 8.8817 | 0.9093 | -0.2195  |
| -0.26004 | 1504 | 13.697 | 3.9797  | 1.002007 | 3164 | 9.4185 | 0.3725 | -0.08992 |
| 0.837638 | 2146 | 10.531 | 0.8137  | 0.204873 | 3850 | 8.026  | 1.765  | -0.42607 |
| 0.626838 | 1454 | 9.5598 | 0.1575  | -0.03966 | 2478 | 12.066 | 2.275  | 0.549183 |
| -0.86905 | 3516 | 6.57   | 3.1473  | -0.79243 | 3529 | 4.9589 | 4.8321 | -1.16646 |
| -0.0305  | 2063 | 11.973 | 2.2557  | 0.567939 | 2021 | 7.7684 | 2.0226 | -0.48825 |
| -0.36373 | 2675 | 6.9533 | 2.764   | -0.69592 | 3898 | 8.5428 | 1.2482 | -0.30131 |
| 0        | 3222 | 11.173 | 1.4557  | 0.366516 | 2741 | 7.8803 | 1.9107 | -0.46124 |
| 0.233728 | 2268 | 11.464 | 1.7467  | 0.439783 | 2264 | 6.0512 | 3.7398 | -0.90278 |
| -0.48843 | 2229 | 9.9596 | 0.2423  | 0.061006 | 2200 | 8.6818 | 1.1092 | -0.26776 |
| 0.144912 | 1863 | 10.091 | 0.3737  | 0.09409  | 1719 | 8.4933 | 1.2977 | -0.31326 |
| 0.083252 | 3462 | 8.4633 | 1.254   | -0.31573 | 2437 | 6.8937 | 2.8973 | -0.69941 |
| -0.39645 | 2252 | 5.2842 | 4.4331  | -1.11616 | 2500 | 10.08  | 0.289  | 0.069764 |
| -0.10351 | 5330 | 10.206 | 0.4887  | 0.123045 | 2412 | 7.9602 | 1.8308 | -0.44195 |
| -0.77213 | 3608 | 7.3725 | 2.3448  | -0.59037 | 3721 | 5.4286 | 4.3624 | -1.05308 |
| -0.65393 | 2891 | 5.4998 | 4.2175  | -1.06188 | 2119 | 4.2945 | 5.4965 | -1.32685 |
| 0.352374 | 2191 | 7.6221 | 2.0952  | -0.52753 | 2046 | 6.9404 | 2.8506 | -0.68813 |
| -0.89329 | 1914 | 9.3521 | 0.3652  | -0.09195 | 2549 | 5.7277 | 4.0633 | -0.98088 |
| -0.86773 | 3575 | 7.7203 | 1.997   | -0.5028  | 2045 | 7.824  | 1.967  | -0.47483 |
| -0.78076 | 1368 | 6.0673 | 3.65    | -0.919   | 2034 | 4.8181 | 4.9729 | -1.20045 |
| 0.608139 | 1766 | 8.3239 | 1.3934  | -0.35083 | 2315 | 11.447 | 1.656  | 0.399757 |
| -0.02849 | 2732 | 6.4422 | 3.2751  | -0.8246  | 2077 | 6.1627 | 3.6283 | -0.87587 |
| -0.73749 | 2740 | 4.4161 | 5.3012  | -1.33473 | 1868 | 7.3876 | 2.4034 | -0.58018 |
| -0.2291  | 2595 | 6.0501 | 3.6672  | -0.92333 | 1935 | 8.0103 | 1.7807 | -0.42986 |
| 4.086687 | 2624 | 14.177 | 4.4597  | 1.122861 | 1640 | 12.927 | 3.136  | 0.757027 |
| -0.05298 | 3989 | 7.6711 | 2.0462  | -0.51519 | 2568 | 9.3458 | 0.4452 | -0.10747 |
| 0.079468 | 2662 | 11.608 | 1.8907  | 0.47604  | 2054 | 11.149 | 1.358  | 0.32782  |
| -0.24419 | 1456 | 8.3791 | 1.3382  | -0.33693 | 1055 | 6.7299 | 3.0611 | -0.73895 |
| -0.02337 | 3298 | 9.9151 | 0.1978  | 0.049802 | 1973 | 11.353 | 1.562  | 0.377065 |
| 0.627505 | 2714 | 8.4009 | 1.3164  | -0.33144 | 2407 | 8.5999 | 1.1911 | -0.28753 |
| 0.867021 | 1514 | 19.947 | 10.2297 | 2.57563  | 1909 | 16.344 | 6.553  | 1.581887 |
| 0.07279  | 2807 | 11.329 | 1.6117  | 0.405793 | 3037 | 8.3635 | 1.4275 | -0.3446  |
| 1.378998 | 2301 | 11.821 | 2.1037  | 0.529669 | 1543 | 11.925 | 2.134  | 0.515145 |
| -0.27264 | 3026 | 8.8566 | 0.8607  | -0.21671 | 2115 | 12.53  | 2.739  | 0.661192 |
| -0.3885  | 2380 | 8.1933 | 1.524   | -0.38371 | 1400 | 12.429 | 2.638  | 0.63681  |
| -0.36869 | 2195 | 10.934 | 1.2167  | 0.30634  | 1871 | 7.643  | 2.148  | -0.51852 |
| -0.43104 | 4501 | 9.309  | 0.4083  | -0.1028  | 3225 | 6.8217 | 2.9693 | -0.71679 |
| -0.91421 | 2176 | 7.9963 | 1.721   | -0.43331 | 2626 | 6.3214 | 3.4696 | -0.83756 |
| -0.87036 | 2542 | 4.4847 | 5.2326  | -1.31746 | 2286 | 5.5118 | 4.2792 | -1.03299 |
| -0.46191 | 1768 | 3.9593 | 5.758   | -1.44975 | 1516 | 6.9261 | 2.8649 | -0.69158 |

|                 |             |               |               |                 |             |               |              |                 |
|-----------------|-------------|---------------|---------------|-----------------|-------------|---------------|--------------|-----------------|
| 2.37112         | 1643        | 11.199        | 1.4817        | 0.373062        | 3063        | 15.736        | 5.945        | 1.435117        |
| 1.306431        | 2346        | 15.985        | 6.2677        | 1.578079        | 2593        | 16.236        | 6.445        | 1.555816        |
| 1.068696        | 1063        | 15.71         | 5.9927        | 1.508839        | 2327        | 7.5204        | 2.2706       | -0.54812        |
| 0.093046        | 712         | 22.331        | 12.6137       | 3.175872        | 1466        | 10.709        | 0.918        | 0.221604        |
| 1.069586        | 2485        | 13.119        | 3.4017        | 0.856479        | 2473        | 10.352        | 0.561        | 0.135425        |
| 0.397338        | 2419        | 10.666        | 0.9487        | 0.238863        | 1594        | 13.551        | 3.76         | 0.90766         |
| 0.16361         | 1005        | 17.015        | 7.2977        | 1.837412        | 1214        | 12.932        | 3.141        | 0.758234        |
| 1.754299        | 2473        | 13.061        | 3.3437        | 0.841875        | 2468        | 10.818        | 1.027        | 0.247917        |
| 0.558945        | 1994        | 10.08         | 0.3627        | 0.09132         | 1988        | 12.022        | 2.231        | 0.538561        |
| 1.161297        | 1447        | 11.057        | 1.3397        | 0.337309        | 970         | 15.567        | 5.776        | 1.39432         |
| 0.506412        | 1912        | 16.004        | 6.2867        | 1.582863        | 2319        | 15.912        | 6.121        | 1.477603        |
| 0.202565        | 2035        | 10.221        | 0.5037        | 0.126821        | 2586        | 13.457        | 3.666        | 0.884969        |
| -0.0374         | 1361        | 10.066        | 0.3487        | 0.087796        | 1658        | 16.526        | 6.735        | 1.625822        |
| 0.631957        | 1463        | 9.1593        | 0.558         | -0.14049        | 1762        | 9.6481        | 0.1429       | -0.0345         |
| 1.117222        | 1830        | 11.53         | 1.8127        | 0.456401        | 2032        | 10.384        | 0.593        | 0.14315         |
| 0.166281        | 2688        | 9.7098        | 0.0075        | -0.00189        | 2200        | 13.682        | 3.891        | 0.939283        |
| -0.90927        | 1573        | 7.5016        | 2.2157        | -0.55787        | 1567        | 7.4027        | 2.3883       | -0.57653        |
| 0.495059        | 1696        | 8.7264        | 0.9909        | -0.24949        | 1990        | 12.362        | 2.571        | 0.620637        |
| 0.279139        | 1094        | 7.9525        | 1.7648        | -0.44434        | 1399        | 4.1458        | 5.6452       | -1.36275        |
| 0.050307        | 867         | 10.035        | 0.3177        | 0.07999         | 1724        | 8.6427        | 1.1483       | -0.2772         |
| -1.43879        | 2347        | 6.3911        | 3.3262        | -0.83747        | 3438        | 4.1594        | 5.6316       | -1.35946        |
| 0.044297        | 1803        | 12.978        | 3.2607        | 0.820978        | 2662        | 10.105        | 0.314        | 0.075799        |
| <b>2.533617</b> | <b>3140</b> | <b>18.089</b> | <b>8.3717</b> | <b>2.107823</b> | <b>3583</b> | <b>19.648</b> | <b>9.857</b> | <b>2.37947</b>  |
| 1.439545        | 3756        | 14.963        | 5.2457        | 1.32076         | 4156        | 10.78         | 0.989        | 0.238744        |
| 0.201674        | 2366        | 8.5799        | 1.1374        | -0.28637        | 2901        | 9.8931        | 0.1021       | 0.024647        |
| 0.130665        | 2955        | 10.761        | 1.0437        | 0.262782        | 3191        | 12.504        | 2.713        | 0.654915        |
| 0.103954        | 2134        | 9.8875        | 0.1702        | 0.042853        | 1902        | 11.725        | 1.934        | 0.466866        |
| 0.732127        | 2442        | 14.537        | 4.8197        | 1.213502        | 2346        | 15.388        | 5.597        | 1.35111         |
| 0.41804         | 2192        | 10.219        | 0.5017        | 0.126318        | 2288        | 9.7028        | 0.0882       | -0.02129        |
| <b>2.171226</b> | <b>2604</b> | <b>14.055</b> | <b>4.3377</b> | <b>1.092144</b> | <b>2824</b> | <b>18.52</b>  | <b>8.729</b> | <b>2.107171</b> |
| 0.442749        | 2662        | 6.0856        | 3.6317        | -0.91439        | 2465        | 15.335        | 5.544        | 1.338316        |
| 0.560503        | 3707        | 10.952        | 1.2347        | 0.310872        | 3411        | 18.206        | 8.415        | 2.031372        |
| 0.044742        | 1941        | 8.1917        | 1.5256        | -0.38411        | 3376        | 14.307        | 4.516        | 1.090158        |
| 1.069141        | 2535        | 8.7574        | 0.9599        | -0.24168        | 2709        | 13.547        | 3.756        | 0.906694        |
| 0.982773        | 2653        | 7.9156        | 1.8017        | -0.45363        | 2462        | 13.16         | 3.369        | 0.813273        |
| -0.59772        | 2445        | 2.5767        | 7.1406        | -1.79786        | 1310        | 8.4733        | 1.3177       | -0.31809        |
| 0.586992        | 4194        | 10.515        | 0.7977        | 0.200845        | 3615        | 8.3264        | 1.4646       | -0.35355        |
| -0.86419        | 2551        | 5.3312        | 4.3861        | -1.10433        | 2794        | 7.5161        | 2.2749       | -0.54916        |
| -1.07317        | 3197        | 5.1924        | 4.5249        | -1.13928        | 3076        | 6.502         | 3.289        | -0.79396        |
| -0.69181        | 4711        | 6.177         | 3.5403        | -0.89138        | 4379        | 13.542        | 3.751        | 0.905487        |
| 0.957842        | 3391        | 10.056        | 0.3387        | 0.085278        | 3054        | 15.619        | 5.828        | 1.406873        |
| 0.316758        | 1737        | 14.22         | 4.5027        | 1.133688        | 1954        | 17.861        | 8.07         | 1.94809         |
| 1.185115        | 1668        | 11.571        | 1.8537        | 0.466724        | 1461        | 17.796        | 8.005        | 1.932399        |
| 0.429393        | 2866        | 9.9093        | 0.192         | 0.048342        | 2207        | 19.755        | 9.964        | 2.405299        |
| -0.68823        | 2088        | 6.7529        | 2.9644        | -0.74638        | 1732        | 9.5266        | 0.2644       | -0.06383        |
| -0.19963        | 1493        | 8.7743        | 0.943         | -0.23743        | 1354        | 11.448        | 1.657        | 0.399998        |
| -0.87884        | 2736        | 9.0643        | 0.653         | -0.16441        | 2158        | 14.133        | 4.342        | 1.048154        |



|          |      |        |         |          |      |        |        |          |
|----------|------|--------|---------|----------|------|--------|--------|----------|
| -0.91439 | 2852 | 7.3983 | 2.319   | -0.58388 | 1385 | 14.44  | 4.649  | 1.122264 |
| 2.694556 | 3324 | 18.231 | 8.5137  | 2.143576 | 2652 | 17.421 | 7.63   | 1.841874 |
| -0.85395 | 2252 | 6.1723 | 3.545   | -0.89256 | 2232 | 12.59  | 2.799  | 0.675676 |
| -0.36203 | 2821 | 8.1886 | 1.5287  | -0.3849  | 2144 | 14.039 | 4.248  | 1.025463 |
| 0.057876 | 2279 | 16.849 | 7.1317  | 1.795616 | 2462 | 17.262 | 7.471  | 1.803492 |
| 0.732794 | 2177 | 15.158 | 5.4407  | 1.369857 | 2979 | 15.576 | 5.785  | 1.396493 |
| -0.99544 | 1686 | 5.8126 | 3.9047  | -0.98312 | 1098 | 8.561  | 1.23   | -0.29692 |
| -0.93685 | 1311 | 10.221 | 0.5037  | 0.126821 | 1134 | 7.9365 | 1.8545 | -0.44767 |
| 0.527559 | 3197 | 12.23  | 2.5127  | 0.632647 | 3668 | 12.595 | 2.804  | 0.676883 |
| -0.18994 | 2545 | 8.998  | 0.7193  | -0.18111 | 3093 | 13.45  | 3.659  | 0.883279 |
| -0.92029 | 2071 | 5.9392 | 3.7781  | -0.95125 | 1575 | 5.7143 | 4.0767 | -0.98411 |
| -0.73275 | 2461 | 15.563 | 5.8457  | 1.471828 | 1712 | 11.624 | 1.833  | 0.442484 |
| -1.07577 | 2331 | 9.2235 | 0.4938  | -0.12433 | 2337 | 8.0017 | 1.7893 | -0.43194 |
| 1.085391 | 1619 | 17.171 | 7.4537  | 1.876689 | 2521 | 17.771 | 7.98   | 1.926364 |
| 1.783905 | 1516 | 17.348 | 7.6307  | 1.921254 | 1693 | 20.083 | 10.292 | 2.484478 |
| 0.536463 | 2877 | 16.58  | 6.8627  | 1.727888 | 3059 | 17.13  | 7.339  | 1.771627 |
| 0.116642 | 1876 | 19.563 | 9.8457  | 2.478946 | 1463 | 18.865 | 9.074  | 2.190454 |
| 0.605023 | 3454 | 13.607 | 3.8897  | 0.979347 | 3294 | 20.735 | 10.944 | 2.64187  |
| 0.781098 | 1849 | 12.223 | 2.5057  | 0.630884 | 1934 | 14.995 | 5.204  | 1.25624  |
| 1.123232 | 3037 | 11.228 | 1.5107  | 0.380363 | 2036 | 21.709 | 11.918 | 2.876993 |
| 1.418398 | 3032 | 21.834 | 12.1167 | 3.050738 | 2226 | 15.499 | 5.708  | 1.377905 |
| 1.36119  | 2170 | 9.3548 | 0.3625  | -0.09127 | 1237 | 18.674 | 8.883  | 2.144347 |
| 0.553603 | 1085 | 15.023 | 5.3057  | 1.335867 | 985  | 22.03  | 12.239 | 2.954482 |
| 0.47881  | 1750 | 8.6286 | 1.0887  | -0.27411 | 1214 | 22.158 | 12.367 | 2.985381 |
| 1.395916 | 2082 | 15.658 | 5.9407  | 1.495747 | 2070 | 16.522 | 6.731  | 1.624856 |
| 0.918219 | 3002 | 12.192 | 2.4747  | 0.623079 | 2284 | 18.52  | 8.729  | 2.107171 |
| 0.199894 | 4083 | 9.6988 | 0.0185  | -0.00466 | 3269 | 10.156 | 0.365  | 0.088111 |
| 1.154174 | 3413 | 14.093 | 4.3757  | 1.101712 | 3001 | 14.429 | 4.638  | 1.119608 |
| -0.71688 | 3318 | 9.2224 | 0.4949  | -0.12461 | 2710 | 15.203 | 5.412  | 1.306451 |
| 1.384118 | 3648 | 10.499 | 0.7817  | 0.196816 | 3254 | 9.6804 | 0.1106 | -0.0267  |
| 0.877929 | 1859 | 10.92  | 1.2027  | 0.302815 | 2662 | 10.443 | 0.652  | 0.157392 |
| 0.647762 | 2207 | 12.415 | 2.6977  | 0.679226 | 3160 | 12.5   | 2.709  | 0.65395  |
| 1.137701 | 1822 | 18.222 | 8.5047  | 2.14131  | 2774 | 10.743 | 0.952  | 0.229812 |
| 2.063934 | 3478 | 16.791 | 7.0737  | 1.781013 | 3232 | 21.751 | 11.96  | 2.887132 |
| 2.983489 | 2357 | 13.661 | 3.9437  | 0.992943 | 2879 | 22.959 | 13.168 | 3.178741 |
| 2.785153 | 3744 | 15.037 | 5.3197  | 1.339392 | 3039 | 24.975 | 15.184 | 3.665402 |
| 2.275625 | 2216 | 21.48  | 11.7627 | 2.961608 | 2608 | 17.983 | 8.192  | 1.97754  |
| 2.43367  | 1595 | 26.395 | 16.6777 | 4.199104 | 2836 | 16.079 | 6.288  | 1.517917 |
| 2.983266 | 3428 | 17.182 | 7.4647  | 1.879459 | 3198 | 19.887 | 10.096 | 2.437164 |
| 2.002497 | 3944 | 21.045 | 11.3277 | 2.852084 | 5853 | 14.027 | 4.236  | 1.022566 |
| 2.244684 | 2710 | 23.358 | 13.6407 | 3.43445  | 4257 | 16.068 | 6.277  | 1.515261 |
| 1.202255 | 1665 | 15.195 | 5.4777  | 1.379173 | 2966 | 16.453 | 6.662  | 1.6082   |
| 1.230525 | 1829 | 15.145 | 5.4277  | 1.366584 | 2930 | 20.239 | 10.448 | 2.522136 |
| 0.924452 | 2727 | 12.541 | 2.8237  | 0.71095  | 2347 | 16.233 | 6.442  | 1.555092 |
| 0.906644 | 896  | 18.527 | 8.8097  | 2.218103 | 2435 | 13.306 | 3.515  | 0.848517 |
| 1.247665 | 2078 | 15.014 | 5.2967  | 1.333601 | 3417 | 12.994 | 3.203  | 0.773201 |
| 2.412523 | 1245 | 20.241 | 10.5237 | 2.649653 | 2081 | 11.437 | 1.646  | 0.397343 |

|                 |             |               |               |                 |             |               |              |                 |
|-----------------|-------------|---------------|---------------|-----------------|-------------|---------------|--------------|-----------------|
| 1.118113        | 1431        | 14.885        | 5.1677        | 1.301121        | 1793        | 15.393        | 5.602        | 1.352317        |
| 0.330559        | 2748        | 14.229        | 4.5117        | 1.135954        | 4592        | 8.9286        | 0.8624       | -0.20818        |
| 1.563977        | 1612        | 15.074        | 5.3567        | 1.348708        | 4354        | 9.853         | 0.062        | 0.014967        |
| 1.633873        | 1653        | 15.366        | 5.6487        | 1.422227        | 3138        | 12.906        | 3.115        | 0.751958        |
| 2.538959        | 882         | 25.17         | 15.4527       | 3.890674        | 1095        | 11.05         | 1.259        | 0.303921        |
| 1.613394        | 987         | 17.021        | 7.3037        | 1.838923        | 2736        | 10.892        | 1.101        | 0.26578         |
| -1.40818        | 2652        | 3.5822        | 6.1351        | -1.54469        | 3410        | 6.2757        | 3.5153       | -0.84859        |
| -0.89839        | 2587        | 5.6823        | 4.035         | -1.01593        | 3253        | 6.8245        | 2.9665       | -0.71611        |
| 0.600571        | 1200        | 4.25          | 5.4673        | -1.37655        | 3019        | 10.235        | 0.444        | 0.107181        |
| -0.55529        | 2386        | 3.2691        | 6.4482        | -1.62353        | 3113        | 6.2641        | 3.5269       | -0.85139        |
| -0.18814        | 2719        | 4.4134        | 5.3039        | -1.33541        | 4059        | 8.8938        | 0.8972       | -0.21658        |
| -1.22621        | 2036        | 5.2554        | 4.4619        | -1.12342        | 2274        | 8.4433        | 1.3477       | -0.32533        |
| 1.608275        | 2960        | 9.5946        | 0.1227        | -0.03089        | 3320        | 13.554        | 3.763        | 0.908384        |
| -0.58341        | 3072        | 5.306         | 4.4113        | -1.11068        | 3837        | 6.9846        | 2.8064       | -0.67746        |
| 0.427389        | 2621        | 8.8897        | 0.8276        | -0.20837        | 2901        | 7.1355        | 2.6555       | -0.64103        |
| -0.52153        | 2273        | 8.623         | 1.0943        | -0.27552        | 3778        | 9.4494        | 0.3416       | -0.08246        |
| -1.14347        | 2037        | 4.9092        | 4.8081        | -1.21058        | 1328        | 3.3133        | 6.4777       | -1.56371        |
| -1.14351        | 2338        | 5.6459        | 4.0714        | -1.0251         | 2082        | 5.6676        | 4.1234       | -0.99538        |
| 0.129775        | 2449        | 9.3099        | 0.4074        | -0.10258        | 3205        | 8.5803        | 1.2107       | -0.29226        |
| 0.291159        | 2560        | 12.656        | 2.9387        | 0.739905        | 3717        | 10.573        | 0.782        | 0.188774        |
| 0.592557        | 2904        | 10.572        | 0.8547        | 0.215196        | 3165        | 9.9842        | 0.1932       | 0.046638        |
| -1.31801        | 1302        | 3.6866        | 6.0307        | -1.51841        | 3065        | 4.4372        | 5.3538       | -1.2924         |
| -0.44949        | 1591        | 6.3482        | 3.3691        | -0.84827        | 3675        | 5.6327        | 4.1583       | -1.00381        |
| -1.05523        | 2385        | 5.283         | 4.4343        | -1.11647        | 5532        | 4.483         | 5.308        | -1.28135        |
| -0.64489        | 1732        | 7.2171        | 2.5002        | -0.6295         | 2381        | 6.3839        | 3.4071       | -0.82247        |
| -0.63274        | 1414        | 6.6478        | 3.0695        | -0.77284        | 2731        | 5.7488        | 4.0422       | -0.97578        |
| 1.756303        | 2647        | 13.638        | 3.9207        | 0.987152        | 2745        | 23.024        | 13.233       | 3.194432        |
| 0.854778        | 2088        | 11.59         | 1.8727        | 0.471508        | 2520        | 12.222        | 2.431        | 0.586841        |
| <b>2.391599</b> | <b>3310</b> | <b>15.287</b> | <b>5.5697</b> | <b>1.402337</b> | <b>3579</b> | <b>18.664</b> | <b>8.873</b> | <b>2.141933</b> |
| 1.321568        | 1817        | 7.3198        | 2.3975        | -0.60364        | 3225        | 13.891        | 4.1          | 0.989736        |
| 0.531343        | 3142        | 7.0337        | 2.6836        | -0.67568        | 4105        | 9.1108        | 0.6802       | -0.1642         |
| 0.069228        | 1947        | 6.0606        | 3.6567        | -0.92068        | 2613        | 10.18         | 0.389        | 0.093904        |
| 0.536908        | 1918        | 7.2471        | 2.4702        | -0.62195        | 1631        | 11.527        | 1.736        | 0.419069        |
| 0.289156        | 1180        | 11.61         | 1.8927        | 0.476543        | 2386        | 10.268        | 0.477        | 0.115147        |
| -0.25122        | 1834        | 6.2159        | 3.5014        | -0.88158        | 2320        | 9.2241        | 0.5669       | -0.13685        |
| -1.0104         | 1930        | 4.5596        | 5.1577        | -1.2986         | 3280        | 7.7439        | 2.0471       | -0.49417        |
| 1.288846        | 3212        | 13.2          | 3.4827        | 0.876873        | 2505        | 18.283        | 8.492        | 2.04996         |
| 0.337014        | 2707        | 9.9003        | 0.183         | 0.046076        | 3186        | 8.2863        | 1.5047       | -0.36323        |
| -0.69319        | 1567        | 7.7856        | 1.9317        | -0.48636        | 2382        | 8.2284        | 1.5626       | -0.37721        |
| -1.0715         | 2089        | 7.3719        | 2.3454        | -0.59052        | 2735        | 7.4223        | 2.3687       | -0.5718         |
| -0.90023        | 2440        | 3.3197        | 6.3976        | -1.61079        | 2613        | 5.0517        | 4.7393       | -1.14406        |
| 1.251449        | 2122        | 14.326        | 4.6087        | 1.160377        | 2804        | 9.5578        | 0.2332       | -0.05629        |
| -1.04639        | 2662        | 4.5079        | 5.2094        | -1.31162        | 3225        | 4.6202        | 5.1708       | -1.24823        |
| -0.72011        | 986         | 11.055        | 1.3377        | 0.336806        | 2442        | 6.0197        | 3.7713       | -0.91039        |
| -0.57907        | 1561        | 10.57         | 0.8527        | 0.214692        | 3796        | 7.6923        | 2.0987       | -0.50662        |
| -1.03998        | 1156        | 5.3633        | 4.354         | -1.09625        | 4089        | 7.8748        | 1.9162       | -0.46257        |
| 1.268144        | 2390        | 11.464        | 1.7467        | 0.439783        | 3737        | 14.771        | 4.98         | 1.202167        |

|          |      |        |          |          |      |        |         |          |
|----------|------|--------|----------|----------|------|--------|---------|----------|
| 0.224379 | 1327 | 3.8433 | 5.874    | -1.47895 | 1600 | 8.8125 | 0.9785  | -0.23621 |
| 0.14224  | 1778 | 4.2182 | 5.4991   | -1.38456 | 2148 | 9.9162 | 0.1252  | 0.030223 |
| 0.156487 | 2525 | 7.2079 | 2.5094   | -0.63182 | 3407 | 10.919 | 1.128   | 0.272298 |
| 0.241742 | 2418 | 7.8164 | 1.9009   | -0.47861 | 4163 | 5.9813 | 3.8097  | -0.91966 |
| -0.04675 | 2129 | 12.259 | 2.5417   | 0.639948 | 1558 | 7.3171 | 2.4739  | -0.5972  |
| -0.21993 | 1755 | 4.9573 | 4.76     | -1.19847 | 1983 | 5.7993 | 3.9917  | -0.96359 |
| 0.628396 | 2697 | 15.276 | 5.5587   | 1.399567 | 2032 | 11.024 | 1.233   | 0.297645 |
| 0.90798  | 2286 | 12.248 | 2.5307   | 0.637179 | 3901 | 13.458 | 3.667   | 0.88521  |
| -0.27001 | 691  | 11.867 | 2.1497   | 0.541251 | 1294 | 6.3369 | 3.4541  | -0.83382 |
| -0.34418 | 1515 | 11.287 | 1.5697   | 0.395218 | 1420 | 9.7887 | 0.0023  | -0.00056 |
| 0.599013 | 1415 | 11.166 | 1.4487   | 0.364753 | 2036 | 13.261 | 3.47    | 0.837654 |
| -0.32174 | 1121 | 5.5308 | 4.1865   | -1.05408 | 1719 | 5.2356 | 4.5554  | -1.09967 |
| -0.50125 | 1495 | 6.8227 | 2.8946   | -0.7288  | 2378 | 7.3171 | 2.4739  | -0.5972  |
| -1.53159 | 2753 | 3.923  | 5.7943   | -1.45889 | 2610 | 4.023  | 5.768   | -1.39239 |
| -0.33606 | 1888 | 8.7924 | 0.9249   | -0.23287 | 2267 | 6.352  | 3.439   | -0.83017 |
| 1.013491 | 1601 | 9.6814 | 0.0359   | -0.00904 | 3271 | 14.705 | 4.914   | 1.186234 |
| 0.576085 | 1944 | 7.6646 | 2.0527   | -0.51683 | 2395 | 10.063 | 0.272   | 0.065661 |
| -0.60404 | 1374 | 4.294  | 5.4233   | -1.36548 | 2281 | 8.242  | 1.549   | -0.37393 |
| -1.32807 | 674  | 5.0445 | 4.6728   | -1.17652 | 1401 | 6.5667 | 3.2243  | -0.77834 |
| -0.55812 | 2023 | 12.704 | 2.9867   | 0.75199  | 2204 | 8.0762 | 1.7148  | -0.41395 |
| -0.10462 | 3096 | 17.248 | 7.5307   | 1.896076 | 2687 | 12.877 | 3.086   | 0.744957 |
| 0.552044 | 1886 | 16.755 | 7.0377   | 1.771949 | 2569 | 11.639 | 1.848   | 0.446105 |
| -0.77549 | 1306 | 22.052 | 12.3347  | 3.105626 | 1834 | 11.614 | 1.823   | 0.44007  |
| -0.72872 | 2122 | 15.174 | 5.4567   | 1.373886 | 3488 | 9.031  | 0.76    | -0.18346 |
| -0.80465 | 1425 | 13.825 | 4.1077   | 1.034235 | 1348 | 9.9407 | 0.1497  | 0.036137 |
| -0.74386 | 3077 | 9.7173 | 0        | 0        | 2946 | 8.0448 | 1.7462  | -0.42153 |
| -0.07702 | 1780 | 10.393 | 0.6757   | 0.170127 | 2210 | 7.8281 | 1.9629  | -0.47384 |
| -1.37668 | 1960 | 6.7857 | 2.9316   | -0.73812 | 2658 | 6.4334 | 3.3576  | -0.81052 |
| -1.54708 | 1344 | 11.533 | 1.8157   | 0.457156 | 2500 | 8.2    | 1.591   | -0.38407 |
| -1.1917  | 1382 | 11.071 | 1.3537   | 0.340834 | 2517 | 10.528 | 0.737   | 0.177911 |
| 0.38888  | 2181 | 13.067 | 3.3497   | 0.843386 | 4386 | 13.406 | 3.615   | 0.872657 |
| -0.63051 | 1587 | 14.556 | 4.8387   | 1.218286 | 2459 | 8.6621 | 1.1289  | -0.27252 |
| -0.79677 | 2600 | 10.769 | 1.0517   | 0.264797 | 2299 | 10.613 | 0.822   | 0.19843  |
| -1.10295 | 1818 | 7.3157 | 2.4016   | -0.60467 | 3563 | 8.7567 | 1.0343  | -0.24968 |
| -0.936   | 1557 | 10.405 | 0.6877   | 0.173149 | 2864 | 7.1229 | 2.6681  | -0.64408 |
| -0.85224 | 2662 | 9.7671 | 0.0498   | 0.012539 | 3714 | 7.1352 | 2.6558  | -0.64111 |
| -0.91586 | 1058 | 9.0737 | 0.6436   | -0.16205 | 1165 | 7.1245 | 2.6665  | -0.64369 |
| -1.351   | 2396 | 5.6344 | 4.0829   | -1.02799 | 1904 | 8.5609 | 1.2301  | -0.29694 |
| 0.091711 | 1583 | 10.171 | 0.4537   | 0.114232 | 2821 | 17.653 | 7.862   | 1.897879 |
|          |      | 9.7173 | 2.6836   |          |      | 9.791  | 2.799   |          |
|          |      |        | 8.0508   |          |      |        | 8.397   |          |
|          |      |        | 3.971728 |          |      |        | 4.14252 |          |
|          | 1694 | 45.455 | 3407     | 40.71    | 2649 | 29.03  |         |          |
|          | 1992 | 36.245 | 2063     | 39.554   | 3176 | 40.271 |         |          |
|          | 3139 | 35.553 | 2447     | 30.854   | 1843 | 36.137 |         |          |
|          | 3479 | 37.223 | 3926     | 40.015   | 3720 | 33.199 |         |          |

|           |          |          |          |          |          |          |
|-----------|----------|----------|----------|----------|----------|----------|
| mn        | 2576     | 38.619   | 2960.75  | 37.78325 | 2847     | 34.65925 |
| sd        | 866.2867 | 4.608541 | 856.493  | 4.643872 | 799.4978 | 4.743285 |
|           | 597      | 8.5427   | 756      | 5.291    | 1034     | 8.1238   |
|           | 582      | 7.9038   | 689      | 7.9826   | 1367     | 9.4367   |
|           | 710      | 6.6197   | 1199     | 8.2569   | 1025     | 10.341   |
|           | 726      | 9.0909   | 578      | 11.765   | 1109     | 10.821   |
| mn        | 653.75   | 8.039275 | 805.5    | 8.323875 | 1133.75  | 9.680625 |
| sd        | 74.72784 | 1.063469 | 272.4096 | 2.655851 | 159.9945 | 1.185995 |
| 3posSD    |          | 13.82562 |          | 13.93162 |          | 14.22986 |
| 3negSD    |          | 3.190407 |          | 7.967552 |          | 3.557986 |
| Sum3SD    |          | 17.01603 |          | 21.89917 |          | 17.78784 |
| MnDiff    |          | 30.57973 |          | 29.45938 |          | 24.97863 |
| SumovrMn  |          | 0.556448 |          | 0.743368 |          | 0.712123 |
| 1minus    |          | 0.443552 |          | 0.256632 |          | 0.287877 |
| PLK1 SMAR | 160      | 26.25    | 105      | 45.714   | 135      | 36.296   |
|           | 2411     | 10.991   | 1617     | 7.9159   | 2092     | 9.369    |
|           | 2208     | 10.915   | 2055     | 7.1533   | 2299     | 12.484   |
|           | 5214     | 22.114   | 4478     | 21.974   | 5866     | 18.548   |
|           | 5683     | 17.332   | 4318     | 16.79    | 6440     | 18.898   |
| PLK1 SMAR | 170      | 32.941   | 293      | 10.922   | 135      | 28.148   |







Y

Y



Y

x toxic b,c

X debris a,c

x debris a,c

x debris a,c

X debris a,c

x toxic b

X debris a,c

X debris a,c

x toxic ab

x toxic a,b,c

Y

0.03125

|           |                        |                | cell ct | % inf  | AD     |
|-----------|------------------------|----------------|---------|--------|--------|
| 50066 A02 | M-027165- sushi, von \ | 79987 SVEP1    | 3431    | 13.874 | 0.916  |
| 50066 A04 | M-010678- l(3)mbt-like | 83746 L3MBTL2  | 3027    | 10.836 | 3.954  |
| 50066 A05 | M-014521- hypothetic   | 79999 FLJ22659 | 3696    | 12.229 | 2.561  |
| 50066 A06 | M-014578- hypothetic   | 80154 FLJ22795 | 1986    | 26.888 | 12.098 |
| 50066 A07 | M-014522- KIAA1772     | 80000 KIAA1772 | 3809    | 24.941 | 10.151 |
| 50066 A08 | M-014466- coiled-coil  | 79879 CCDC134  | 4127    | 23.867 | 9.077  |
| 50066 A09 | M-019079- pecanex-lik  | 80003 PCNXL2   | 2575    | 23.767 | 8.977  |
| 50066 A10 | M-014585- chromoson    | 80169 C17orf68 | 3059    | 15.136 | 0.346  |
| 50066 A11 | M-014523- RNA bindin   | 80004 RBM35B   | 2346    | 15.772 | 0.982  |
| 50066 A12 | M-014548- hypothetic   | 80076 FLJ13621 | 2837    | 15.615 | 0.825  |
| 50066 A13 | M-018931- dedicator c  | 80005 DOCK5    | 1188    | 15.488 | 0.698  |
| 50066 A14 | M-007813- CD276 mol    | 80381 CD276    | 2672    | 20.696 | 5.906  |
| 50066 A15 | M-014524- hypothetic   | 80006 FLJ13611 | 1769    | 14.189 | 0.601  |
| 50066 A16 | M-018563- programme    | 80380 PDCD1LG2 | 4155    | 24.116 | 9.326  |
| 50066 A17 | M-014525- chromoson    | 80007 C10orf88 | 2261    | 11.101 | 3.689  |
| 50066 A18 | M-007074- ring finger  | 80352 RNF39    | 3548    | 15.389 | 0.599  |
| 50066 A19 | M-014526- transmemk    | 80008 TMEM156  | 2534    | 20.876 | 6.086  |
| 50066 A20 | M-004741- tankyrase,   | 80351 TNKS2    | 2647    | 21.232 | 6.442  |
| 50066 A21 | M-014527- RMI1, RecC   | 80010 RMI1     | 3027    | 22.167 | 7.377  |
| 50066 A23 | M-014528- NEFA-inter   | 80011 NIP30    | 2315    | 19.352 | 4.562  |
| 50066 B02 | M-014708- coiled-coil  | 83446 CCDC70   | 3893    | 8.6309 | 6.1591 |
| 50066 B04 | M-014707- germ cell a  | 83445 GSG1     | 4898    | 25.194 | 10.404 |
| 50066 B05 | M-008785- UBX domai    | 80700 UBXD1    | 3955    | 8.799  | 5.991  |
| 50066 B06 | M-009848- zinc finger, | 83444 ZNHIT4   | 4621    | 14.889 | 0.099  |
| 50066 B07 | M-007424- solute carri | 80704 SLC19A3  | 5818    | 20.368 | 5.578  |
| 50066 B08 | M-014706- splicing fac | 83443 SF3B5    | 2484    | 4.9517 | 9.8383 |
| 50066 B09 | M-014618- testis speci | 80705 TSGA10   | 5483    | 19.953 | 5.163  |
| 50066 B10 | M-014705- SH3 domai    | 83442 SH3BGL3  | 4695    | 13.695 | 1.095  |
| 50066 B11 | M-016055- extraembry   | 80712 ESX1     | 5566    | 19.601 | 4.811  |
| 50066 B12 | M-014704- hypothetic   | 83441 PP1057   | 4680    | 14.402 | 0.388  |
| 50066 B13 | M-014619- transmemk    | 80723 TMEM22   | 4552    | 14.192 | 0.598  |
| 50066 B14 | M-009945- elongation   | 83401 ELOVL3   | 4184    | 10.397 | 4.393  |
| 50066 B15 | M-010674- SNAP25-int   | 80725 SNIP     | 5280    | 12.348 | 2.442  |
| 50066 B16 | M-014698- zinc finger  | 81931 ZNF93    | 5076    | 13.002 | 1.788  |
| 50066 B17 | M-025280- tweety hor   | 80727 TTYH3    | 4625    | 11.741 | 3.049  |
| 50066 B18 | M-013475- SEH1-like (  | 81929 SEH1L    | 3581    | 11.421 | 3.369  |
| 50066 B19 | M-023929- KIAA1680 p   | 80730 KIAA1680 | 4601    | 11.019 | 3.771  |
| 50066 B20 | M-032282- Cdk5 and A   | 81928 CABLES2  | 5302    | 23.482 | 8.692  |
| 50066 B21 | M-014620- solute carri | 80736 SLC44A4  | 5101    | 11.194 | 3.596  |
| 50066 B23 | M-014621- chromoson    | 80737 C6orf27  | 5987    | 15.734 | 0.944  |
| 50066 C02 | M-014614- WD repeat    | 80349 WDR61    | 2934    | 7.2597 | 7.5303 |
| 50066 C04 | M-016343- receptor ac  | 80346 REEP4    | 5003    | 19.588 | 4.798  |
| 50066 C05 | M-015805- polyhomec    | 80012 PHC3     | 3173    | 16.136 | 1.346  |
| 50066 C06 | M-014613- zinc finger  | 80345 ZSCAN16  | 5692    | 14.213 | 0.577  |
| 50066 C07 | M-008465- chromoson    | 80013 C10orf97 | 5537    | 20.191 | 5.401  |
| 50066 C08 | M-019051- WD repeat    | 80344 WDR23    | 5566    | 12.9   | 1.89   |

|                  |                               |                       |             |               |               |
|------------------|-------------------------------|-----------------------|-------------|---------------|---------------|
| 50066 C09        | M-016585- WW and C:           | 80014 WWC2            | 5628        | 25            | 10.21         |
| 50066 C10        | M-024241- sel-1 suppr         | 80343 SEL1L2          | 4719        | 12.693        | 2.097         |
| 50066 C11        | M-017134- chromoson           | 80017 C14orf159       | 4112        | 15.175        | 0.385         |
| 50066 C12        | M-014612- TRAF3 inte          | 80342 TRAF3IP3        | 4332        | 9.2567        | 5.5333        |
| <b>50066 C13</b> | <b>M-014530- chromoson</b>    | <b>80018 C12orf30</b> | <b>4055</b> | <b>34.747</b> | <b>19.957</b> |
| 50066 C14        | M-009407- bactericida         | 80341 BPIL1           | 3925        | 9.707         | 5.083         |
| 50066 C15        | M-018385- ubiquitin d         | 80019 UBTD1           | 5374        | 19.371        | 4.581         |
| 50066 C16        | M-009564- patatin-like        | 80339 PNPLA3          | 5676        | 13.46         | 1.33          |
| 50066 C17        | M-008133- FAD-depen           | 80020 FOXRED2         | 6217        | 11.903        | 2.887         |
| 50066 C18        | M-016629- transmemk           | 80335 TMEM113         | 4850        | 10.495        | 4.295         |
| 50066 C19        | M-015699- transmemk           | 80021 TMEM62          | 4547        | 11.634        | 3.156         |
| 50066 C20        | M-021472- Kv channel          | 80333 KCNIP4          | 5809        | 20.675        | 5.885         |
| 50066 C21        | M-014531- neurensin :         | 80023 NRSN2           | 5307        | 13.115        | 1.675         |
| 50066 C23        | M-007332- solute carri        | 80024 SLC24A6         | 4812        | 17.311        | 2.521         |
| 50066 D02        | M-005947- family with         | 81926 FAM108A1        | 5968        | 15.382        | 0.592         |
| 50066 D04        | M-007368- solute carri        | 81894 SLC25A28        | 3789        | 15.571        | 0.781         |
| 50066 D05        | M-010982- chromoson           | 80739 C6orf25         | 5154        | 10.303        | 4.487         |
| 50066 D06        | M-014696- chromoson           | 81892 C14orf156       | 4065        | 12.374        | 2.416         |
| 50066 D07        | M-014622- lymphocyte          | 80740 LY6G6C          | 5454        | 11.973        | 2.817         |
| 50066 D08        | M-007081- queuine tR          | 81890 QTRT1           | 3440        | 7.2093        | 7.5807        |
| <b>50066 D09</b> | <b>M-014623- lymphocyte</b>   | <b>80741 LY6G5C</b>   | <b>5738</b> | <b>28.703</b> | <b>13.913</b> |
| 50066 D10        | M-014694- hydroxypyr          | 81888 HYI             | 5581        | 21.681        | 6.891         |
| 50066 D11        | M-014624- proline rich        | 80742 PRR3            | 3807        | 23.273        | 8.483         |
| 50066 D12        | M-018577- LAS1-like (S        | 81887 LAS1L           | 2816        | 14.773        | 0.017         |
| 50066 D13        | M-014625- THUMP do            | 80745 THUMPD2         | 3957        | 12.99         | 1.8           |
| 50066 D14        | M-008958- RAB1B, me           | 81876 RAB1B           | 2185        | 7.2311        | 7.5589        |
| 50066 D15        | M-016675- tRNA splici         | 80746 TSEN2           | 4491        | 14.273        | 0.517         |
| 50066 D16        | M-014692- interferon :        | 81875 ISG20L2         | 5573        | 18.859        | 4.069         |
| 50066 D17        | M-014626- alanyl-tRNA         | 80755 AARSD1          | 3655        | 9.5486        | 5.2414        |
| <b>50066 D18</b> | <b>M-014690- actin relate</b> | <b>81873 ARPC5L</b>   | <b>6746</b> | <b>30.981</b> | <b>16.191</b> |
| 50066 D19        | M-014627- transmemk           | 80757 TMEM121         | 4045        | 10.408        | 4.382         |
| 50066 D20        | M-018575- SHANK-ass           | 81858 SHARPIN         | 3879        | 13.818        | 0.972         |
| 50066 D21        | M-016618- proline rich        | 80758 PRR7            | 4604        | 20.308        | 5.518         |
| 50066 D23        | M-016599- chromoson           | 80759 C6orf148        | 3028        | 15.125        | 0.335         |
| 50066 E02        | M-024098- DnaJ (Hsp4          | 80331 DNAJC5          | 3878        | 6.4724        | 8.3176        |
| 50066 E04        | M-014611- UL16 bindii         | 80329 ULBP1           | 3493        | 6.8995        | 7.8905        |
| 50066 E05        | M-016587- F-box and I         | 80028 FBXL18          | 4846        | 11.494        | 3.296         |
| 50066 E06        | M-015898- UL16 bindii         | 80328 ULBP2           | 5875        | 30.809        | 16.019        |
| 50066 E07        | M-013165- sema doma           | 80031 SEMA6D          | 5426        | 17.269        | 2.479         |
| 50066 E08        | M-016145- pseudouric          | 80324 PUS1            | 5569        | 10.163        | 4.627         |
| 50066 E09        | M-014533- zinc finger         | 80032 ZNF556          | 5396        | 6.4307        | 8.3593        |
| 50066 E10        | M-014610- coiled-coil         | 80323 CCDC68          | 5570        | 17.325        | 2.535         |
| 50066 E11        | M-015646- family with         | 80034 FAM130A2        | 4541        | 15.701        | 0.911         |
| 50066 E12        | M-014608- centrosom           | 80321 CEP70           | 3165        | 18.483        | 3.693         |
| 50066 E13        | M-010927- family with         | 80039 FAM106A         | 4531        | 10.836        | 3.954         |
| 50066 E14        | M-032231- Sp6 transcr         | 80320 SP6             | 3724        | 11.869        | 2.921         |
| 50066 E15        | M-014538- hypothetic          | 80052 FLJ12331        | 4253        | 7.0538        | 7.7362        |

|           |                        |                 |      |        |         |
|-----------|------------------------|-----------------|------|--------|---------|
| 50066 E16 | M-008812- CXXC finger  | 80319 CXXC4     | 3832 | 5.5324 | 9.2576  |
| 50066 E17 | M-014539- hypothetical | 80054 FLJ12355  | 5048 | 13.946 | 0.844   |
| 50066 E18 | M-014607- zinc finger  | 80317 ZKSCAN3   | 5872 | 10.065 | 4.725   |
| 50066 E19 | M-008110- GPI deacyl   | 80055 PGAP1     | 5730 | 16.405 | 1.615   |
| 50066 E20 | M-014636- cytoplasmic  | 80315 CPEB4     | 4862 | 7.2398 | 7.5502  |
| 50066 E21 | M-018334- leucine rich | 80059 LRRTM4    | 6047 | 10.435 | 4.355   |
| 50066 E23 | M-014541- guanine nu   | 80060 FLJ12595  | 4192 | 5.6298 | 9.1602  |
| 50066 F02 | M-014689- mediator o   | 81857 MED25     | 4396 | 11.51  | 3.28    |
| 50066 F04 | M-014688- zinc finger  | 81856 ZNF611    | 5873 | 9.1606 | 5.6294  |
| 50066 F05 | M-016148- inter-alpha  | 80760 ITIH5     | 4812 | 12.219 | 2.571   |
| 50066 F06 | M-018729- sideroflexin | 81855 SFXN3     | 4334 | 11.329 | 3.461   |
| 50066 F07 | M-019188- uroplakin 3  | 80761 UPK3B     | 3619 | 14.341 | 0.449   |
| 50066 F08 | M-015288- transmembr   | 81853 TMEM14B   | 2351 | 12.633 | 2.157   |
| 50066 F09 | M-013419- Nedd4 fam    | 80762 NDFIP1    | 3730 | 12.949 | 1.841   |
| 50066 F10 | M-013622- keratin ass  | 81851 KRTAP1-1  | 5148 | 11.694 | 3.096   |
| 50066 F11 | M-014628- chromosom    | 80763 C12orf39  | 4972 | 20.998 | 6.208   |
| 50066 F12 | M-014685- ST6 (alpha-  | 81849 ST6GALNA4 | 2541 | 9.2483 | 5.5417  |
| 50066 F13 | M-003821- THAP doma    | 80764 THAP7     | 2523 | 8.1649 | 6.6251  |
| 50066 F14 | M-015457- sprouty ho   | 81848 SPRY4     | 4316 | 18.536 | 3.746   |
| 50066 F15 | M-014629- START dom    | 80765 STARD5    | 3904 | 17.495 | 2.705   |
| 50066 F16 | M-007080- ring finger  | 81847 RNF146    | 3497 | 5.6334 | 9.1566  |
| 50066 F17 | M-016724- LIM domain   | 80774 LIMD2     | 3946 | 9.706  | 5.084   |
| 50066 F18 | M-014684- SET binding  | 81846 SBF2      | 5952 | 19.472 | 4.682   |
| 50066 F19 | M-014631- transmembr   | 80775 TMEM177   | 6468 | 13.358 | 1.432   |
| 50066 F20 | M-007079- tripartite r | 81844 TRIM56    | 4885 | 12.958 | 1.832   |
| 50066 F21 | M-014632- hypothetical | 80776 MGC4093   | 4701 | 9.3172 | 5.4728  |
| 50066 F23 | M-014633- cytochrom    | 80777 CYB5B     | 2949 | 1.3903 | 13.3997 |
| 50066 G02 | M-026281- leucine rich | 80313 LRRC27    | 7048 | 24.83  | 10.04   |
| 50066 G04 | M-014635- CXXC finger  | 80312 CXXC6     | 4638 | 7.0073 | 7.7827  |
| 50066 G05 | M-014543- chromosom    | 80067 C2orf37   | 6351 | 13.069 | 1.721   |
| 50066 G06 | M-024931- kelch-like 1 | 80311 KLHL15    | 4417 | 14.308 | 0.482   |
| 50066 G07 | M-028334- hypothetical | 80068 FLJ13105  | 4592 | 16.834 | 2.044   |
| 50066 G08 | M-008876- platelet de  | 80310 PDGFD     | 4414 | 10.172 | 4.618   |
| 50066 G09 | M-014544- chromosom    | 80069 C6orf208  | 5982 | 8.8098 | 5.9802  |
| 50066 G10 | M-023135- SPHK1 (sph   | 80309 SKIP      | 4193 | 10.398 | 4.392   |
| 50066 G11 | M-014545- coiled-coil  | 80071 CCDC15    | 4081 | 8.9929 | 5.7971  |
| 50066 G12 | M-008629- FAD1 flavin  | 80308 FLAD1     | 3727 | 10.33  | 4.46    |
| 50066 G13 | M-014547- hypothetical | 80075 FLJ13544  | 3554 | 6.8092 | 7.9808  |
| 50066 G14 | M-014606- mediator o   | 80306 MED28     | 3268 | 3.3354 | 11.4546 |
| 50066 G15 | M-008676- tubulin, alp | 80086 TUBA4B    | 3486 | 6.6839 | 8.1061  |
| 50066 G16 | M-019390- TraB doma    | 80305 TRABD     | 4747 | 7.352  | 7.438   |
| 50066 G17 | M-014554- hypothetical | 80094 FLJ14107  | 5293 | 23.087 | 8.297   |
| 50066 G18 | M-014605- chromosom    | 80304 C2orf44   | 5123 | 14.542 | 0.248   |
| 50066 G19 | M-017135- zinc finger  | 80095 ZNF606    | 147  | 42.177 | 27.387  |
| 50066 G20 | M-010673- EF-hand do   | 80303 EFHD1     | 5029 | 10.678 | 4.112   |
| 50066 G21 | M-014555- family with  | 80097 FAM128B   | 4566 | 7.6873 | 7.1027  |
| 50066 G23 | M-014556- prefoldin si | 80098 PFDN6L    | 3184 | 6.0616 | 8.7284  |

|                  |                             |                      |             |               |               |
|------------------|-----------------------------|----------------------|-------------|---------------|---------------|
| 50066 H02        | M-016662- vang-like 1       | 81839 VANGL1         | 4974        | 24.347        | 9.557         |
| <b>50066 H04</b> | <b>M-013464- sperm acro</b> | <b>81833 SPACA1</b>  | <b>5504</b> | <b>30.124</b> | <b>15.334</b> |
| 50066 H05        | M-018566- zinc finger       | 80778 ZNF34          | 5142        | 13.672        | 1.118         |
| 50066 H06        | M-017249- neuropilin        | 81832 NETO1          | 4936        | 26.357        | 11.567        |
| 50066 H07        | M-026584- integrator        | 80789 INTS5          | 4013        | 22.153        | 7.363         |
| 50066 H08        | M-017616- neuropilin        | 81831 NETO2          | 4611        | 14.335        | 0.455         |
| 50066 H09        | M-014637- c-Maf-indu        | 80790 CMIP           | 3924        | 16.004        | 1.214         |
| 50066 H10        | M-007437- solute carri      | 81796 SLC05A1        | 4862        | 15.487        | 0.697         |
| 50066 H11        | M-023422- additional        | 80816 ASXL3          | 3900        | 22.897        | 8.107         |
| 50066 H12        | M-007078- ring finger       | 81790 RNF170         | 2982        | 22.502        | 7.712         |
| 50066 H13        | M-014639- KIAA1712          | 80817 KIAA1712       | 3002        | 8.8608        | 5.9292        |
| 50066 H14        | M-013456- tigger trans      | 81789 TIGD6          | 3870        | 10.543        | 4.247         |
| 50066 H15        | M-014640- zinc finger       | 80818 ZNF436         | 4197        | 22.445        | 7.655         |
| 50066 H16        | M-030535- hypothetic        | 81787 DKFZP547L      | 3541        | 11.522        | 3.268         |
| 50066 H17        | M-014641- KIAA1706 p        | 80820 KIAA1706       | 3874        | 10.325        | 4.465         |
| 50066 H18        | M-007077- tripartite r      | 81786 TRIM7          | 4156        | 8.1328        | 6.6572        |
| 50066 H19        | M-021963- DDHD dom          | 80821 DDHD1          | 5261        | 14.199        | 0.591         |
| 50066 H20        | M-026106- dedicator c       | 81704 DOCK8          | 4845        | 13.375        | 1.415         |
| 50066 H21        | M-024779- basic helix-      | 80823 BHLHB9         | 5530        | 14.593        | 0.197         |
| 50066 H23        | M-013429- zinc finger       | 80829 ZFP91          | 3368        | 6.6508        | 8.1392        |
| 50066 I02        | M-015750- pleckstrin b      | 80301 PLEKHQ1        | 3520        | 7.2443        | 7.5457        |
| 50066 I04        | M-017693- signal pept       | 80274 SCUBE1         | 3955        | 10.442        | 4.348         |
| 50066 I05        | M-014557- hypothetic        | 80099 FLJ21075       | 4284        | 13.749        | 1.041         |
| 50066 I06        | M-014603- GrpE-like 1       | 80273 GRPEL1         | 4840        | 17.934        | 3.144         |
| 50066 I07        | M-014560- zinc finger       | 80108 ZFP2           | 4680        | 23.782        | 8.992         |
| 50066 I08        | M-009536- hydroxy-de        | 80270 HSD3B7         | 3768        | 14.809        | 0.019         |
| 50066 I09        | M-014562- zinc finger       | 80110 ZNF614         | 4765        | 26.737        | 11.947        |
| 50066 I10        | M-018942- zinc finger       | 80264 ZNF430         | 4300        | 19.884        | 5.094         |
| 50066 I11        | M-014563- chromoson         | 80111 C3orf36        | 4024        | 23.882        | 9.092         |
| 50066 I12        | M-007073- tripartite r      | 80263 TRIM45         | 4414        | 17.807        | 3.017         |
| 50066 I13        | M-012945- Williams-B        | 80112 WBSCR23        | 3483        | 6.6609        | 8.1291        |
| 50066 I14        | M-016626- chromoson         | 80262 C16orf70       | 4514        | 16.017        | 1.227         |
| 50066 I15        | M-012946- bicaudal C        | 80114 BICC1          | 4783        | 16.538        | 1.748         |
| 50066 I16        | M-018562- EF-hand do        | 80258 EFHC2          | 4647        | 9.3609        | 5.4291        |
| 50066 I17        | M-016595- BAI1-assoc        | 80115 BAIAP2L2       | 4231        | 19.452        | 4.662         |
| 50066 I18        | M-019475- KIAA1539          | 80256 KIAA1539       | 4945        | 8.6957        | 6.0943        |
| 50066 I19        | M-009028- ADP-ribosy        | 80117 ARL14          | 2302        | 9.9044        | 4.8856        |
| 50066 I20        | M-010744- solute carri      | 80255 SLC35F5        | 6047        | 16.736        | 1.946         |
| 50066 I21        | M-008525- hypothetic        | 80118 FLJ22684       | 6541        | 15.441        | 0.651         |
| 50066 I23        | M-014564- PIF1 5'-to-3'     | 80119 PIF1           | 5850        | 9.5897        | 5.2003        |
| <b>50066 J02</b> | <b>M-014680- chromoson</b>  | <b>81698 C15orf5</b> | <b>5481</b> | <b>28.681</b> | <b>13.891</b> |
| 50066 J04        | M-014679- exonucleas        | 81691 LOC81691       | 4491        | 8.8176        | 5.9724        |
| 50066 J05        | M-013432- apolipopro        | 80830 APOL6          | 5044        | 17.645        | 2.855         |
| 50066 J06        | M-014678- iron-sulfur       | 81689 ISCA1          | 5433        | 22.695        | 7.905         |
| 50066 J07        | M-013433- apolipopro        | 80831 APOL5          | 4842        | 15.696        | 0.906         |
| 50066 J08        | M-015706- chromoson         | 81688 C6orf62        | 4766        | 13.995        | 0.795         |
| 50066 J09        | M-014642- SH3-bindin        | 80851 SH3BP5L        | 4936        | 11.73         | 3.06          |

|                  |                              |                     |             |               |              |
|------------------|------------------------------|---------------------|-------------|---------------|--------------|
| 50066 J10        | M-015899- transmemk          | 81671 TMEM49        | 4312        | 23.516        | 8.726        |
| 50066 J11        | M-023449- glutamate i        | 80852 GRIP2         | 3824        | 16.946        | 2.156        |
| 50066 J12        | M-014677- cyclin L2          | 81669 CCNL2         | 3683        | 16.4          | 1.61         |
| 50066 J13        | M-025357- jumonji C d        | 80853 JHDM1D        | 3390        | 17.404        | 2.614        |
| 50066 J14        | M-012846- microtubul         | 81631 MAP1LC3B      | 4525        | 24.155        | 9.365        |
| 50066 J15        | M-023148- KIAA1715           | 80856 KIAA1715      | 4661        | 20.275        | 5.485        |
| 50066 J16        | M-006481- TSC22 dom          | 81628 TSC22D4       | 3697        | 12.659        | 2.131        |
| 50066 J17        | M-028689- chromoson          | 80862 C6orf12       | 4180        | 17.727        | 2.937        |
| 50066 J18        | M-019040- chromoson          | 81627 C1orf25       | 4974        | 22.859        | 8.069        |
| 50066 J19        | M-016655- proline-rich       | 80863 PRRT1         | 4574        | 15.654        | 0.864        |
| 50066 J20        | M-014676- chromoson          | 81626 C1orf14       | 4475        | 18.168        | 3.378        |
| 50066 J21        | M-014645- EGF-like-dc        | 80864 EGFL8         | 6227        | 13.345        | 1.445        |
| 50066 J23        | M-008230- N-acetylne         | 80896 NPL           | 4552        | 13.576        | 1.214        |
| 50066 K02        | M-016516- centrosom.         | 80254 CEP63         | 5389        | 12.173        | 2.617        |
| 50066 K04        | M-014602- DEP domai          | 80243 DEPDC2        | 3204        | 13.233        | 1.557        |
| <b>50066 K05</b> | <b>M-019137- valosin con</b> | <b>80124 VCIPI1</b> | <b>4691</b> | <b>23.385</b> | <b>8.595</b> |
| 50066 K06        | M-014601- elongation         | 80237 ELL3          | 4884        | 15.93         | 1.14         |
| 50066 K07        | M-010981- coiled-coil        | 80125 CCDC33        | 4658        | 12.173        | 2.617        |
| 50066 K08        | M-012954- phosphatid         | 80235 PIGZ          | 3653        | 17.164        | 2.374        |
| 50066 K09        | M-014567- chromoson          | 80127 C14orf45      | 3882        | 13.421        | 1.369        |
| 50066 K10        | M-017139- chromoson          | 80233 C17orf70      | 4124        | 16.246        | 1.456        |
| 50066 K11        | M-007071- tripartite r       | 80128 TRIM46        | 3606        | 13.505        | 1.285        |
| 50066 K12        | M-032006- WD repeat          | 80232 WDR26         | 3660        | 17.541        | 2.751        |
| 50066 K13        | M-014568- chromoson          | 80129 C6orf97       | 3115        | 11.942        | 2.848        |
| 50066 K14        | M-014600- chromoson          | 80231 CXorf21       | 4822        | 26.13         | 11.34        |
| 50066 K15        | M-016488- leucine rich       | 80131 LRRC8E        | 5480        | 13.869        | 0.921        |
| 50066 K16        | M-016355- RUN and F          | 80230 RUFY1         | 4138        | 14.741        | 0.049        |
| 50066 K17        | M-014569- chromoson          | 80133 C1orf129      | 4034        | 13.014        | 1.776        |
| 50066 K18        | M-015012- transmemk          | 80228 TMEM142E      | 4466        | 24.989        | 10.199       |
| 50066 K19        | M-031267- brix domai         | 80135 BXDC5         | 5942        | 19.892        | 5.102        |
| 50066 K20        | M-014599- WD repeat          | 80227 WDR71         | 4521        | 5.4192        | 9.3708       |
| 50066 K21        | M-014572- zinc finger        | 80139 ZNF703        | 4073        | 15.443        | 0.653        |
| 50066 K23        | M-021342- prostaglan         | 80142 PTGES2        | 3758        | 8.0628        | 6.7272       |
| 50066 L02        | M-019333- galectin-3 i       | 81625 GALIG         | 4689        | 9.5116        | 5.2784       |
| 50066 L04        | M-019046- defensin, b        | 81623 DEFB126       | 3658        | 9.9781        | 4.8119       |
| 50066 L05        | M-006051- transmemk          | 80975 TMPRSS5       | 4301        | 11.579        | 3.211        |
| 50066 L06        | M-013454- unc-93 hon         | 81622 UNC93B1       | 4306        | 11.124        | 3.666        |
| 50066 L07        | M-018567- gap junctio        | 81025 GJA10         | 4524        | 19.739        | 4.949        |
| 50066 L08        | M-017143- Kazal-type         | 81621 KAZALD1       | 4302        | 14.575        | 0.215        |
| 50066 L09        | M-014650- Z-DNA binc         | 81030 ZBP1          | 4125        | 13.721        | 1.069        |
| 50066 L10        | M-003248- chromatin          | 81620 CDT1          | 4130        | 13.971        | 0.819        |
| 50066 L11        | M-007510- solute carri       | 81031 SLC2A10       | 3731        | 12.034        | 2.756        |
| 50066 L12        | M-014675- tetraspanir        | 81619 TSPAN14       | 3320        | 21.777        | 6.987        |
| 50066 L13        | M-007356- solute carri       | 81034 SLC25A32      | 3730        | 17.399        | 2.609        |
| 50066 L14        | M-018574- integral me        | 81618 ITM2C         | 3885        | 15.521        | 0.731        |
| 50066 L15        | M-013240- collectin su       | 81035 COLEC12       | 3828        | 15.569        | 0.779        |
| 50066 L16        | M-014674- calcium bir        | 81617 CAB39L        | 4520        | 11.704        | 3.086        |



|                  |                               |                     |             |               |               |
|------------------|-------------------------------|---------------------|-------------|---------------|---------------|
| 50066 L17        | M-015661- CLPTM1-lik          | 81037 CLPTM1L       | 4203        | 9.2553        | 5.5347        |
| 50066 L18        | M-015674- acyl-CoA sy         | 81616 ACSBG2        | 6203        | 18.507        | 3.717         |
| 50066 L19        | M-008959- phosphatid          | 81490 PTSS2         | 5485        | 21.805        | 7.015         |
| 50066 L20        | M-014673- transmembr          | 81615 TMEM163       | 5566        | 11.319        | 3.471         |
| 50066 L21        | M-014651- radial spok         | 81492 RSHL1         | 6337        | 18.936        | 4.146         |
| 50066 L23        | M-014652- syncoilin, ir       | 81493 SYNC1         | 5530        | 17.649        | 2.859         |
| 50066 M02        | M-014598- hypothetic          | 80225 FLJ21477      | 7044        | 18.356        | 3.566         |
| 50066 M04        | M-021287- nucleotide          | 80224 NUBPL         | 5505        | 20.745        | 5.955         |
| 50066 M05        | M-014574- suppressor          | 80143 SIKE          | 6782        | 19.965        | 5.175         |
| 50066 M06        | M-015897- threonyl-tR         | 80222 TARS2         | 4923        | 26.325        | 11.535        |
| <b>50066 M07</b> | <b>M-019398- Fraser sync</b>  | <b>80144 FRAS1</b>  | <b>5315</b> | <b>44.572</b> | <b>29.782</b> |
| 50066 M08        | M-018561- hypothetic          | 80221 FLJ20920      | 4682        | 23.003        | 8.213         |
| 50066 M09        | M-014575- THO compl           | 80145 THOC7         | 4919        | 26.977        | 12.187        |
| 50066 M10        | M-018559- coenzyme I          | 80219 COQ10B        | 3992        | 15.456        | 0.666         |
| 50066 M11        | M-009861- UDP-glucur          | 80146 UXS1          | 3908        | 21.213        | 6.423         |
| 50066 M12        | M-014597- N-acetyltra         | 80218 NAT13         | 4771        | 30.623        | 15.833        |
| 50066 M13        | M-018387- PQ loop re          | 80148 PQLC1         | 4272        | 22.612        | 7.822         |
| 50066 M14        | M-016621- chromosom           | 80217 C10orf79      | 4048        | 14.452        | 0.338         |
| 50066 M15        | M-014576- zinc finger         | 80149 ZC3H12A       | 3858        | 19.414        | 4.624         |
| 50066 M16        | M-021283- chromosom           | 80215 C21orf96      | 4336        | 29.036        | 14.246        |
| 50066 M17        | M-004909- asparagina          | 80150 ASRGL1        | 5223        | 18.955        | 4.165         |
| 50066 M18        | M-012953- TM2 doma            | 80213 TM2D3         | 4786        | 13.811        | 0.979         |
| 50066 M19        | M-014577- centromer           | 80152 CENPT         | 5423        | 17.315        | 2.525         |
| 50066 M20        | M-014596- coiled-coil         | 80212 CCDC92        | 4312        | 8.5575        | 6.2325        |
| 50066 M21        | M-017136- enhancer c          | 80153 EDC3          | 5924        | 19.902        | 5.112         |
| 50066 M23        | M-014580- hypothetic          | 80157 FLJ21511      | 5836        | 22.344        | 7.554         |
| 50066 N02        | M-014672- non imprin          | 81614 NIPA2         | 4268        | 23.102        | 8.312         |
| <b>50066 N04</b> | <b>M-015844- acidic (leuc</b> | <b>81611 ANP32E</b> | <b>5983</b> | <b>30.587</b> | <b>15.797</b> |
| 50066 N05        | M-007907- compleme            | 81494 CFHR5         | 5767        | 24.12         | 9.33          |
| 50066 N06        | M-014671- family with         | 81610 FAM83D        | 5631        | 23.264        | 8.474         |
| 50066 N07        | M-008716- transmembr          | 81501 TM7SF4        | 4605        | 22.041        | 7.251         |
| 50066 N08        | M-017346- sorting nex         | 81609 SNX27         | 3521        | 13.519        | 1.271         |
| <b>50066 N09</b> | <b>M-005896- histocompa</b>   | <b>81502 HM13</b>   | <b>3152</b> | <b>55.171</b> | <b>40.381</b> |
| 50066 N10        | M-014670- FIP1 like 1         | 81608 FIP1L1        | 4974        | 26.96         | 12.17         |
| 50066 N11        | M-019362- HCCA2 pro           | 81532 HCCA2         | 3927        | 31.169        | 16.379        |
| 50066 N12        | M-014248- limb bud ar         | 81606 LBH           | 4644        | 31.611        | 16.821        |
| <b>50066 N13</b> | <b>M-016806- integrin alp</b> | <b>81533 ITFG1</b>  | <b>2965</b> | <b>29.848</b> | <b>15.058</b> |
| 50066 N14        | M-014669- ubiquitin re        | 81605 URM1          | 3150        | 13.048        | 1.742         |
| 50066 N15        | M-007558- solute carri        | 81539 SLC38A1       | 4162        | 35.656        | 20.866        |
| 50066 N16        | M-010058- phospholip          | 81579 PLA2G12A      | 4175        | 19.186        | 4.396         |
| 50066 N17        | M-010675- thioredoxir         | 81542 TXNDC1        | 3936        | 24.136        | 9.346         |
| 50066 N18        | M-013445- collagen, ty        | 81578 COL21A1       | 5514        | 28.346        | 13.556        |
| 50066 N19        | M-014654- leucine ric         | 81543 LRRC3         | 5659        | 23.644        | 8.854         |
| 50066 N20        | M-016812- glucose-fru         | 81577 GFOD2         | 6071        | 21.512        | 6.722         |
| 50066 N21        | M-019423- glyceropho          | 81544 GDPD5         | 4748        | 14.933        | 0.143         |
| 50066 N23        | M-018163- F-box prote         | 81545 FBXO38        | 4156        | 14.413        | 0.377         |
| 50066 O02        | M-018047- armadillo r         | 80210 ARMC9         | 4061        | 16.031        | 1.241         |

|           |                         |                |      |        |         |
|-----------|-------------------------|----------------|------|--------|---------|
| 50066 O04 | M-012952- chromosom     | 80209 C13orf23 | 2862 | 17.54  | 2.75    |
| 50066 O05 | M-015296- chromosom     | 80161 CXorf2   | 4991 | 12.803 | 1.987   |
| 50066 O06 | M-017138- spastic par   | 80208 SPG11    | 3828 | 15.778 | 0.988   |
| 50066 O07 | M-014584- chromosom     | 80167 C4orf29  | 3529 | 6.5174 | 8.2726  |
| 50066 O08 | M-023411- formin hon    | 80206 FHOD3    | 4078 | 14.517 | 0.273   |
| 50066 O09 | M-014586- intraflagelli | 80173 IFT74    | 4005 | 12.884 | 1.906   |
| 50066 O10 | M-006723- hexokinase    | 80201 HKDC1    | 4731 | 27.542 | 12.752  |
| 50066 O11 | M-015262- splA/ryano    | 80176 SPSB1    | 4241 | 15.633 | 0.843   |
| 50066 O12 | M-016342- fuzzy homc    | 80199 FUZ      | 3560 | 10.309 | 4.481   |
| 50066 O13 | M-027137- myc target    | 80177 MYCT1    | 3125 | 12.672 | 2.118   |
| 50066 O14 | M-016143- MUS81 enc     | 80198 MUS81    | 4377 | 6.557  | 8.233   |
| 50066 O15 | M-014588- chromosom     | 80178 C16orf59 | 2535 | 32.426 | 17.636  |
| 50066 O16 | M-007072- ring finger   | 80196 RNF34    | 3527 | 13.071 | 1.719   |
| 50066 O17 | M-017137- myosin hea    | 80179 MYOHD1   | 4920 | 11.585 | 3.205   |
| 50066 O18 | M-018946- chromosom     | 80195 C10orf57 | 4139 | 13.989 | 0.801   |
| 50066 O19 | M-014589- chromosom     | 80183 C13orf18 | 5375 | 16.093 | 1.303   |
| 50066 O20 | M-014594- transmemk     | 80194 TMEM134  | 3659 | 8.7182 | 6.0718  |
| 50066 O21 | M-014590- centrosom     | 80184 CEP290   | 4849 | 20.004 | 5.214   |
| 50066 O23 | M-014591- chromosom     | 80185 C8orf41  | 4758 | 11.98  | 2.81    |
| 50066 P02 | M-014665- coiled-coil   | 81576 CCDC130  | 4648 | 28.873 | 14.083  |
| 50066 P04 | M-014664- apolipopro    | 81575 APOLD1   | 3836 | 15.537 | 0.747   |
| 50066 P05 | M-014655- tudor domi    | 81550 TDRD3    | 2843 | 11.185 | 3.605   |
| 50066 P06 | M-014663- ankyrin rep   | 81573 ANKRD13C | 3869 | 18.713 | 3.923   |
| 50066 P07 | M-016810- stathmin-li   | 81551 STMN4    | 3390 | 21.327 | 6.537   |
| 50066 P08 | M-014662- p53 and DN    | 81572 PDRG1    | 3489 | 16.882 | 2.092   |
| 50066 P09 | M-018568- EGFR-coarr    | 81552 ECOP     | 3588 | 11.288 | 3.502   |
| 50066 P10 | M-014661- chromosom     | 81571 C9orf45  | 3119 | 22.635 | 7.845   |
| 50066 P11 | M-014656- family with   | 81553 FAM49A   | 2963 | 12.049 | 2.741   |
| 50066 P12 | M-017179- ClpB casein   | 81570 CLPB     | 2428 | 17.463 | 2.673   |
| 50066 P13 | M-013444- Williams-Bi   | 81554 WBSCR16  | 3880 | 17.758 | 2.968   |
| 50066 P14 | M-014660- actin-like 8  | 81569 ACTL8    | 4237 | 19.755 | 4.965   |
| 50066 P15 | M-018962- Yip1 domai    | 81555 YIPF5    | 3915 | 15.811 | 1.021   |
| 50066 P16 | M-014659- family with   | 81566 FAM130A1 | 4491 | 11.289 | 3.501   |
| 50066 P17 | M-014657- chromosom     | 81556 C15orf44 | 4001 | 12.897 | 1.893   |
| 50066 P18 | M-010941- chromosom     | 81563 C1orf21  | 3766 | 12.825 | 1.965   |
| 50066 P19 | M-017308- melanoma      | 81557 MAGED4   | 4178 | 11.584 | 3.206   |
| 50066 P20 | M-014658- lectin, man   | 81562 LMAN2L   | 4588 | 16.739 | 1.949   |
| 50066 P21 | M-018570- family with   | 81558 FAM117A  | 2956 | 14.31  | 0.48    |
| 50066 P23 | M-007075- tripartite r  | 81559 TRIM11   | 3663 | 6.6066 | 8.1834  |
|           |                         | medianthN      | 4314 | 14.791 | 4.1555  |
|           |                         | 2xMAD          |      |        | 8.311   |
|           |                         | 3mad           |      |        | 12.4665 |
|           |                         | MADc           |      |        | 6.15014 |
| 50066 C22 |                         |                | 2999 | 46.382 |         |
| 50066 D22 |                         |                | 4010 | 56.584 |         |
| 50066 E22 |                         |                | 5712 | 48.967 |         |
| 50066 F22 |                         |                | 4043 | 39.327 |         |

|           |                                    |      |           |          |          |
|-----------|------------------------------------|------|-----------|----------|----------|
|           |                                    |      | mn        | 4191     | 47.815   |
|           |                                    |      | sd        | 1123.828 | 7.12559  |
| 50066 G22 |                                    |      |           | 2747     | 5.2057   |
| 50066 H22 |                                    |      |           | 2257     | 11.21    |
| 50066 I22 |                                    |      |           | 3332     | 9.5138   |
| 50066 J22 |                                    |      |           | 1569     | 13.767   |
|           |                                    |      | mn        | 2386     | 11.49693 |
|           |                                    |      | sd        | 888.5511 | 2.141069 |
|           |                                    |      | 3psSD     |          | 21.37677 |
|           |                                    |      | 3ngSD     |          | 6.423206 |
|           |                                    |      | SumSD     |          | 27.79998 |
|           |                                    |      | DiffMn    |          | 36.31807 |
|           |                                    |      | SmovrDiff |          | 0.765459 |
|           |                                    |      | 1minus    |          | 0.234541 |
| 50066 G03 | M-003290- polo-like ki             | 5347 | PLK1 SMAR | 952      | 11.345   |
| 50066 H03 | M-003290- polo-like ki             | 5347 | PLK1 SMAR | 719      | 24.896   |
| 50066 I03 | D-001206-( siControl non-targeting |      |           | 4532     | 19.859   |
| 50066 J03 | D-001206-( siControl non-targeting |      |           | 5389     | 18.074   |
| 50066 K03 | D-001600-( siGLO RISC-free siRNA   |      |           | 7070     | 19.632   |
| 50066 L03 | D-001600-( siGLO RISC-free siRNA   |      |           | 6797     | 21.657   |

| rZ              | cell ct     | % inf         | AD            | rZ              | cell ct     | % inf         | AD            | rZ             |
|-----------------|-------------|---------------|---------------|-----------------|-------------|---------------|---------------|----------------|
| -0.1491         | 3767        | 14.68         | 4.57          | 0.848121        | 2093        | 9.3645        | 3.7755        | -0.5763        |
| -0.64307        | 2871        | 11.146        | 1.036         | 0.192122        | 2577        | 9.8952        | 3.2448        | -0.49527       |
| -0.41658        | 2010        | 7.5622        | 2.5478        | -0.47312        | 4106        | 3.9454        | 9.1946        | -1.40371       |
| 1.966947        | 1004        | 36.056        | 25.946        | 4.816045        | 2044        | 20.646        | 7.506         | 1.146191       |
| 1.650369        | 3590        | 13.593        | 3.483         | 0.646347        | 3968        | 11.719        | 1.421         | -0.21681       |
| 1.475739        | 3037        | 19.789        | 9.679         | 1.796481        | 3570        | 14.426        | 1.286         | 0.196503       |
| 1.459479        | 1923        | 16.745        | 6.635         | 1.231437        | 2156        | 11.642        | 1.498         | -0.22857       |
| 0.056096        | 2083        | 12.818        | 2.708         | 0.502487        | 2508        | 10.845        | 2.295         | -0.35025       |
| 0.159509        | 1747        | 12.65         | 2.54          | 0.471302        | 2561        | 6.8723        | 6.2677        | -0.95682       |
| 0.133981        | 2706        | 15.706        | 5.596         | 1.038573        | 2286        | 6.168         | 6.972         | -1.06435       |
| 0.113331        | 1705        | 14.545        | 4.435         | 0.823062        | 1713        | 6.2464        | 6.8936        | -1.05238       |
| 0.960141        | 2388        | 16.374        | 6.264         | 1.162571        | 2483        | 8.1756        | 4.9644        | -0.75783       |
| -0.09788        | 3234        | 9.9876        | 0.1224        | -0.02291        | 3794        | 5.9831        | 7.1569        | -1.09258       |
| 1.516226        | 3005        | 18.037        | 7.927         | 1.471265        | 2643        | 9.1941        | 3.9459        | -0.60232       |
| -0.59999        | 1774        | 7.2717        | 2.8383        | -0.52705        | 1848        | 4.3831        | 8.7569        | -1.33688       |
| 0.097234        | 2939        | 11.432        | 1.322         | 0.245211        | 2722        | 7.6414        | 5.4986        | -0.83939       |
| 0.989408        | 2722        | 12.858        | 2.748         | 0.509912        | 1575        | 6.6032        | 6.5368        | -0.99791       |
| 1.047293        | 3796        | 14.568        | 4.458         | 0.827331        | 2499        | 10.524        | 2.616         | -0.39927       |
| 1.199322        | 4360        | 19.243        | 9.133         | 1.695129        | 4837        | 18.813        | 5.673         | 0.866323       |
| 0.741609        | 3445        | 13.033        | 2.923         | 0.542397        | 1784        | 9.6973        | 3.4427        | -0.52549       |
| -1.00162        | 4122        | 4.4881        | 5.6219        | -1.04375        | 3745        | 3.3378        | 9.8022        | -1.49648       |
| 1.691506        | 3512        | 8.1435        | 1.9665        | -0.36522        | 3491        | 14.294        | 1.154         | 0.176349       |
| -0.97429        | 4030        | 3.2506        | 6.8594        | -1.27346        | 2425        | 6.4742        | 6.6658        | -1.0176        |
| 0.015935        | 3088        | 3.6269        | 6.4831        | -1.20361        | 2929        | 8.8767        | 4.2633        | -0.65078       |
| 0.906809        | 2466        | 7.5831        | 2.5269        | -0.46924        | 3530        | 14.278        | 1.138         | 0.173906       |
| -1.59985        | 1138        | 3.6028        | 6.5072        | -1.20809        | 711         | 9.8453        | 3.2947        | -0.50289       |
| 0.83933         | 2957        | 10.72         | 0.61          | 0.113046        | 3896        | 9.6766        | 3.4634        | -0.52865       |
| -0.17821        | 2464        | 4.3019        | 5.8081        | -1.07832        | 1754        | 4.8461        | 8.2939        | -1.26618       |
| 0.782096        | 3465        | 14.026        | 3.916         | 0.726723        | 5029        | 13.621        | 0.481         | 0.073593       |
| -0.06325        | 3440        | 6.4244        | 3.6856        | -0.68433        | 3907        | 9.8029        | 3.3371        | -0.50937       |
| -0.0974         | 4572        | 10.236        | 0.126         | 0.023203        | 3442        | 7.8152        | 5.3248        | -0.81285       |
| -0.71446        | 2077        | 5.4887        | 4.6213        | -0.85802        | 2748        | 7.6419        | 5.4981        | -0.83931       |
| -0.39723        | 4172        | 6.6395        | 3.4705        | -0.6444         | 4877        | 11.729        | 1.411         | -0.21528       |
| -0.29089        | 3099        | 8.1317        | 1.9783        | -0.36741        | 3031        | 4.223         | 8.917         | -1.36132       |
| -0.49592        | 3131        | 3.7368        | 6.3732        | -1.18321        | 2886        | 4.9203        | 8.2197        | -1.25486       |
| -0.54796        | 3157        | 6.8736        | 3.2364        | -0.60094        | 3504        | 7.6769        | 5.4631        | -0.83397       |
| -0.61332        | 3807        | 7.854         | 2.256         | -0.41896        | 3277        | 8.5749        | 4.5651        | -0.69686       |
| 1.413139        | 5602        | 22.189        | 12.079        | 2.241981        | 4466        | 17.219        | 4.079         | 0.622947       |
| -0.58486        | 4967        | 9.2209        | 0.8891        | -0.16522        | 4828        | 7.7672        | 5.3728        | -0.82018       |
| 0.15333         | 5645        | 8.2019        | 1.9081        | -0.35438        | 4650        | 9.914         | 3.226         | -0.4924        |
| -1.22457        | 2583        | 5.0329        | 5.0771        | -0.94262        | 1849        | 9.4105        | 3.7295        | -0.56928       |
| 0.779982        | 3693        | 5.524         | 4.586         | -0.85146        | 4910        | 10.998        | 2.142         | -0.32689       |
| 0.218694        | 2718        | 9.1244        | 0.9856        | -0.18314        | 2048        | 18.555        | 5.415         | 0.826931       |
| -0.09398        | 3886        | 8.9552        | 1.1548        | -0.21455        | 3460        | 8.4971        | 4.6429        | -0.70874       |
| <b>0.878029</b> | <b>4940</b> | <b>23.806</b> | <b>13.696</b> | <b>2.542137</b> | <b>5645</b> | <b>26.732</b> | <b>13.592</b> | <b>2.07542</b> |
| -0.30747        | 3826        | 8.8866        | 1.2234        | -0.22728        | 5002        | 13.015        | 0.125         | -0.01893       |

|                 |             |               |               |                 |             |               |               |                 |
|-----------------|-------------|---------------|---------------|-----------------|-------------|---------------|---------------|-----------------|
| 1.659962        | 4324        | 24.445        | 14.335        | 2.660751        | 4450        | 25.483        | 12.343        | 1.884719        |
| -0.34113        | 2487        | 12.746        | 2.636         | 0.489122        | 2894        | 12.716        | 0.424         | -0.06458        |
| 0.062438        | 2942        | 17.335        | 7.225         | 1.340956        | 3394        | 12.787        | 0.353         | -0.05374        |
| -0.89987        | 2091        | 7.3649        | 2.7451        | -0.50975        | 3061        | 8.7226        | 4.4174        | -0.67431        |
| <b>3.244804</b> | <b>2762</b> | <b>25.851</b> | <b>15.741</b> | <b>2.92174</b>  | <b>3212</b> | <b>25.934</b> | <b>12.794</b> | <b>1.953579</b> |
| -0.82665        | 3362        | 14.872        | 4.762         | 0.883762        | 3354        | 14.341        | 1.201         | 0.183525        |
| 0.744698        | 2134        | 9.7001        | 0.4099        | -0.07627        | 3226        | 15.313        | 2.173         | 0.331933        |
| -0.21642        | 2932        | 6.6166        | 3.4934        | -0.64865        | 3773        | 11.847        | 1.293         | -0.19727        |
| -0.46958        | 3418        | 5.9099        | 4.2001        | -0.77983        | 3004        | 6.9907        | 6.1493        | -0.93874        |
| -0.69852        | 2824        | 6.7635        | 3.3465        | -0.62138        | 3302        | 6.5415        | 6.5985        | -1.00733        |
| -0.51332        | 4109        | 9.8077        | 0.3023        | -0.0563         | 3095        | 14.346        | 1.206         | 0.184288        |
| 0.956726        | 4565        | 17.59         | 7.48          | 1.388291        | 3523        | 14.647        | 1.507         | 0.230246        |
| -0.27251        | 4263        | 9.2423        | 0.8677        | -0.16125        | 3905        | 10.858        | 2.282         | -0.34827        |
| 0.409747        | 4199        | 12.098        | 1.988         | 0.368837        | 2865        | 12.077        | 1.063         | -0.16215        |
| 0.096095        | 5081        | 6.0421        | 4.0679        | -0.75529        | 5892        | 15.869        | 2.729         | 0.416825        |
| 0.126826        | 2131        | 6.2881        | 3.8219        | -0.70963        | 2795        | 16.601        | 3.461         | 0.528589        |
| -0.72974        | 4888        | 6.6694        | 3.4406        | -0.63885        | 3970        | 7.5819        | 5.5581        | -0.84847        |
| -0.393          | 3399        | 6.2077        | 3.9023        | -0.72455        | 4773        | 12.906        | 0.234         | -0.03558        |
| -0.4582         | 3703        | 7.2104        | 2.8996        | -0.53842        | 5222        | 14.784        | 1.644         | 0.251164        |
| -1.23277        | 3045        | 3.1527        | 6.9573        | -1.29164        | 5429        | 6.2258        | 6.9142        | -1.05553        |
| <b>2.262062</b> | <b>4817</b> | <b>19.763</b> | <b>9.653</b>  | <b>1.791654</b> | <b>5887</b> | <b>32.835</b> | <b>19.695</b> | <b>3.007244</b> |
| 1.1203          | 2406        | 7.1072        | 3.0028        | -0.55758        | 5198        | 23.624        | 10.484        | 1.600881        |
| 1.379156        | 2113        | 8.566         | 1.544         | -0.28679        | 3670        | 19.046        | 5.906         | 0.901898        |
| -0.00293        | 2198        | 6.9609        | 3.1491        | -0.58474        | 1983        | 17.448        | 4.308         | 0.657911        |
| -0.29284        | 2781        | 3.2362        | 6.8738        | -1.27614        | 4196        | 12.178        | 0.962         | -0.14673        |
| -1.22922        | 1826        | 5.3669        | 4.7431        | -0.88062        | 2054        | 10.419        | 2.721         | -0.4153         |
| -0.08423        | 2764        | 9.1534        | 0.9566        | -0.17775        | 4766        | 14.226        | 1.086         | 0.165966        |
| 0.661448        | 4098        | 7.3694        | 2.7406        | -0.50891        | 5505        | 15.186        | 2.046         | 0.312542        |
| -0.8524         | 2114        | 3.1693        | 6.9407        | -1.28855        | 3360        | 7.7083        | 5.4317        | -0.82918        |
| <b>2.63246</b>  | <b>4299</b> | <b>19.563</b> | <b>9.453</b>  | <b>1.754529</b> | <b>6084</b> | <b>36.555</b> | <b>23.415</b> | <b>3.575225</b> |
| -0.71267        | 3965        | 3.884         | 6.226         | -1.15589        | 4660        | 8.6695        | 4.4705        | -0.68242        |
| -0.15821        | 3951        | 4.6064        | 5.5036        | -1.02179        | 3108        | 14.125        | 0.985         | 0.150545        |
| 0.897053        | 3563        | 6.5114        | 3.5986        | -0.66818        | 4275        | 11.205        | 1.935         | -0.29529        |
| 0.054308        | 3373        | 2.4607        | 7.6493        | -1.42009        | 4284        | 15.359        | 2.219         | 0.338956        |
| -1.35259        | 2818        | 2.555         | 7.555         | -1.40258        | 3415        | 6.9693        | 6.1707        | -0.94201        |
| -1.28314        | 1553        | 1.9961        | 8.1139        | -1.50633        | 1655        | 2.9607        | 10.1793       | -1.55405        |
| -0.53609        | 3641        | 6.1796        | 3.9304        | -0.72977        | 2820        | 5.3546        | 7.7854        | -1.18855        |
| 2.604494        | 3364        | 10.048        | 0.062         | -0.01169        | 3352        | 18.616        | 5.476         | 0.836245        |
| 0.402918        | 3209        | 5.4846        | 4.6254        | -0.85878        | 4285        | 10.058        | 3.082         | -0.47042        |
| -0.7525         | 3204        | 4.1823        | 5.9277        | -1.10052        | 3449        | 6.8136        | 6.3264        | -0.96578        |
| -1.35937        | 3958        | 3.2087        | 6.9013        | -1.28124        | 5152        | 5.4348        | 7.7052        | -1.1763         |
| 0.412023        | 3582        | 12.73         | 2.62          | 0.486152        | 4317        | 12.555        | 0.585         | -0.08917        |
| 0.147964        | 3087        | 5.7337        | 4.3763        | -0.81254        | 3877        | 8.8986        | 4.2414        | -0.64744        |
| 0.600312        | 2393        | 9.3188        | 0.7912        | -0.14705        | 1644        | 9.1849        | 3.9551        | -0.60372        |
| -0.64307        | 3301        | 5.1802        | 4.9298        | -0.91528        | 3011        | 6.6091        | 6.5309        | -0.997          |
| -0.47511        | 2781        | 3.2003        | 6.9097        | -1.2828         | 1799        | 5.7254        | 7.4146        | -1.13193        |
| -1.25805        | 2765        | 2.5316        | 7.5784        | -1.40693        | 3292        | 5.9538        | 7.1862        | -1.09706        |

|          |      |        |        |          |      |        |         |          |
|----------|------|--------|--------|----------|------|--------|---------|----------|
| -1.50543 | 2315 | 3.7581 | 6.3519 | -1.17926 | 2437 | 3.0365 | 10.1035 | -1.54248 |
| -0.1374  | 2772 | 5.267  | 4.843  | -0.89917 | 4615 | 10.531 | 2.609   | -0.3982  |
| -0.76844 | 3551 | 3.8862 | 6.2238 | -1.15548 | 4888 | 9.2676 | 3.8724  | -0.5911  |
| 0.262433 | 3696 | 6.8994 | 3.2106 | -0.59615 | 3488 | 10.378 | 2.762   | -0.42156 |
| -1.22781 | 3799 | 4.7118 | 5.3982 | -1.00223 | 4276 | 7.2965 | 5.8435  | -0.89205 |
| -0.70828 | 4998 | 7.7231 | 2.3869 | -0.44325 | 3680 | 8.7228 | 4.4172  | -0.67428 |
| -1.48959 | 3148 | 2.1919 | 7.9181 | -1.46998 | 2928 | 3.1762 | 9.9638  | -1.52115 |
| -0.53348 | 5038 | 6.8877 | 3.2223 | -0.59833 | 3424 | 7.7395 | 5.4005  | -0.82441 |
| -0.91549 | 4957 | 5.8301 | 4.2799 | -0.79464 | 5553 | 6.1768 | 6.9632  | -1.06301 |
| -0.4182  | 5053 | 11.973 | 1.863  | 0.345634 | 5362 | 21.391 | 8.251   | 1.25994  |
| -0.56291 | 5696 | 10.341 | 0.231  | 0.042694 | 4117 | 12.072 | 1.068   | -0.16291 |
| -0.07317 | 5125 | 9.0927 | 1.0173 | -0.18902 | 4195 | 13.349 | 0.209   | 0.032063 |
| -0.35089 | 2062 | 6.5955 | 3.5145 | -0.65257 | 2490 | 8.1526 | 4.9874  | -0.76134 |
| -0.29951 | 3184 | 5.3078 | 4.8022 | -0.89159 | 3460 | 8.237  | 4.903   | -0.74845 |
| -0.50357 | 3236 | 5.0989 | 5.0111 | -0.93037 | 4247 | 11.82  | 1.32    | -0.20139 |
| 1.009245 | 4670 | 12.27  | 2.16   | 0.400765 | 4810 | 19.314 | 6.174   | 0.942817 |
| -0.90123 | 2876 | 8.5188 | 1.5912 | -0.29555 | 2699 | 10.634 | 2.506   | -0.38247 |
| -1.07739 | 2240 | 5      | 5.11   | -0.94873 | 2459 | 11.387 | 1.753   | -0.2675  |
| 0.608929 | 3844 | 14.334 | 4.224  | 0.783895 | 4694 | 19.28  | 6.14    | 0.937626 |
| 0.439665 | 4896 | 15.4   | 5.29   | 0.981772 | 4001 | 9.2727 | 3.8673  | -0.59032 |
| -1.48901 | 2504 | 3.7939 | 6.3161 | -1.17261 | 3813 | 7.1859 | 5.9541  | -0.90894 |
| -0.82681 | 2857 | 15.296 | 5.186  | 0.962467 | 3759 | 11.998 | 1.142   | -0.17421 |
| 0.761121 | 4160 | 11.755 | 1.645  | 0.305168 | 6165 | 22.936 | 9.796   | 1.495835 |
| -0.233   | 5117 | 7.3285 | 2.7815 | -0.5165  | 4905 | 9.1335 | 4.0065  | -0.61157 |
| -0.29804 | 4832 | 17.115 | 7.005  | 1.300119 | 3930 | 18.982 | 5.842   | 0.892127 |
| -0.89003 | 3859 | 17.777 | 7.667  | 1.423003 | 3612 | 10.188 | 2.952   | -0.45057 |
| -2.17893 | 3197 | 4.3791 | 5.7309 | -1.06399 | 3545 | 4.6544 | 8.4856  | -1.29545 |
| 1.632321 | 4977 | 10.006 | 0.104  | -0.01949 | 4634 | 17.026 | 3.886   | 0.593479 |
| -1.26561 | 3373 | 4.2692 | 5.8408 | -1.08439 | 2976 | 8.4341 | 4.7059  | -0.71836 |
| -0.27999 | 4037 | 4.0129 | 6.0971 | -1.13196 | 2802 | 7.5303 | 5.6097  | -0.85635 |
| -0.07853 | 3131 | 13.478 | 3.368  | 0.625    | 1975 | 18.025 | 4.885   | 0.746009 |
| 0.332188 | 3190 | 9.5611 | 0.5489 | -0.10208 | 3026 | 11.633 | 1.507   | -0.22994 |
| -0.75104 | 2162 | 4.8566 | 5.2534 | -0.97535 | 2749 | 10.913 | 2.227   | -0.33987 |
| -0.97253 | 4254 | 8.7682 | 1.3418 | -0.24926 | 3975 | 13.535 | 0.395   | 0.060462 |
| -0.71429 | 3205 | 5.0546 | 5.0554 | -0.9386  | 2307 | 9.7096 | 3.4304  | -0.52361 |
| -0.94276 | 2045 | 5.7213 | 4.3887 | -0.81484 | 2957 | 13.257 | 0.117   | 0.018017 |
| -0.72535 | 3443 | 8.7424 | 1.3676 | -0.25405 | 2452 | 6.7292 | 6.4108  | -0.97867 |
| -1.29782 | 2739 | 3.8335 | 6.2765 | -1.16526 | 2903 | 11.058 | 2.082   | -0.31773 |
| -1.86266 | 1987 | 4.8817 | 5.2283 | -0.97069 | 1698 | 5.6537 | 7.4863  | -1.14288 |
| -1.3182  | 2285 | 7.4398 | 2.6702 | -0.49584 | 2790 | 13.082 | 0.058   | -0.0087  |
| -1.20957 | 2918 | 4.9692 | 5.1408 | -0.95445 | 3595 | 9.1794 | 3.9606  | -0.60456 |
| 1.348912 | 3364 | 21.344 | 11.234 | 2.085128 | 3502 | 26.556 | 13.416  | 2.048548 |
| -0.04049 | 3624 | 9.7958 | 0.3142 | -0.05851 | 4670 | 19.4   | 6.26    | 0.955948 |
| 4.452907 | 4343 | 4.8814 | 5.2286 | -0.97075 | 4809 | 9.2119 | 3.9281  | -0.5996  |
| -0.66877 | 6602 | 12.86  | 2.75   | 0.510284 | 3834 | 13.432 | 0.292   | 0.044736 |
| -1.15505 | 3608 | 6.4302 | 3.6798 | -0.68325 | 2950 | 8.6441 | 4.4959  | -0.68629 |
| -1.41938 | 2718 | 8.2046 | 1.9054 | -0.35388 | 2285 | 10.372 | 2.768   | -0.42247 |

|                 |             |               |               |                 |             |               |               |                 |
|-----------------|-------------|---------------|---------------|-----------------|-------------|---------------|---------------|-----------------|
| 1.553786        | 3691        | 6.99          | 3.12          | -0.57934        | 4592        | 11.999        | 1.141         | -0.17406        |
| <b>2.493114</b> | <b>5085</b> | <b>15.693</b> | <b>5.583</b>  | <b>1.03616</b>  | <b>4635</b> | <b>28.285</b> | <b>15.145</b> | <b>2.312537</b> |
| -0.18195        | 4352        | 7.1461        | 2.9639        | -0.55036        | 4158        | 8.3213        | 4.8187        | -0.73558        |
| 1.880608        | 6419        | 22.963        | 12.853        | 2.385655        | 6103        | 20.023        | 6.883         | 1.05107         |
| 1.197046        | 4564        | 20.508        | 10.398        | 1.929945        | 3822        | 17.242        | 4.102         | 0.626458        |
| -0.07414        | 4110        | 9.9027        | 0.2073        | -0.03867        | 4070        | 11.4          | 1.74          | -0.26552        |
| 0.197231        | 3271        | 11.342        | 1.232         | 0.228505        | 3236        | 10.97         | 2.17          | -0.33117        |
| 0.113168        | 3115        | 10.883        | 0.773         | 0.143303        | 3899        | 14.234        | 1.094         | 0.167188        |
| 1.318019        | 3849        | 12.835        | 2.725         | 0.505643        | 2821        | 7.905         | 5.235         | -0.79914        |
| 1.253793        | 3633        | 17.726        | 7.616         | 1.413536        | 4289        | 16.111        | 2.971         | 0.453774        |
| -0.96424        | 2425        | 5.8969        | 4.2131        | -0.78224        | 2902        | 9.0972        | 4.0428        | -0.61711        |
| -0.69072        | 3872        | 7.9029        | 2.2071        | -0.40988        | 3334        | 5.5789        | 7.5611        | -1.1543         |
| 1.244525        | 4550        | 25.099        | 14.989        | 2.78215         | 3813        | 25.256        | 12.116        | 1.85006         |
| -0.53153        | 3394        | 12.994        | 2.884         | 0.535157        | 2842        | 8.4799        | 4.6601        | -0.71137        |
| -0.72616        | 3112        | 8.1298        | 1.9802        | -0.36776        | 3164        | 9.4501        | 3.6899        | -0.56323        |
| -1.08261        | 3106        | 10.431        | 0.321         | 0.0594          | 3215        | 4.7589        | 8.3811        | -1.2795         |
| -0.09626        | 3787        | 13.309        | 3.199         | 0.593629        | 3149        | 6.256         | 6.884         | -1.05092        |
| -0.23024        | 4313        | 19.801        | 9.691         | 1.798708        | 3654        | 8.8123        | 4.3277        | -0.66061        |
| -0.03219        | 5492        | 15.896        | 5.786         | 1.073842        | 4740        | 13.671        | 0.531         | 0.081227        |
| -1.32358        | 2281        | 6.0061        | 4.1039        | -0.76197        | 3361        | 6.8432        | 6.2968        | -0.96126        |
| -1.22708        | 4142        | 3.4042        | 6.7058        | -1.24495        | 3789        | 5.2784        | 7.8616        | -1.20018        |
| -0.70714        | 3645        | 8.8889        | 1.2211        | -0.22685        | 2580        | 9.031         | 4.109         | -0.62722        |
| -0.16943        | 2455        | 15.031        | 4.921         | 0.913276        | 2533        | 18.358        | 5.218         | 0.796853        |
| 0.511045        | 4594        | 14.954        | 4.844         | 0.898983        | 4348        | 11.04         | 2.1           | -0.32048        |
| 1.461918        | 4197        | 13.605        | 3.495         | 0.648574        | 4261        | 18.564        | 5.424         | 0.828305        |
| 0.002927        | 3538        | 9.8078        | 0.3022        | -0.05628        | 3122        | 8.9366        | 4.2034        | -0.64164        |
| 1.942395        | 3884        | 18.718        | 8.608         | 1.597676        | 3725        | 18.094        | 4.954         | 0.756544        |
| 0.828111        | 4317        | 20.662        | 10.552        | 1.958531        | 4273        | 17.365        | 4.225         | 0.645238        |
| 1.478178        | 4299        | 23.657        | 13.547        | 2.514479        | 3464        | 24.798        | 11.658        | 1.780131        |
| 0.490395        | 4662        | 29.665        | 19.555        | 3.629715        | 2887        | 16.176        | 3.036         | 0.463698        |
| -1.32194        | 2604        | 7.9877        | 2.1223        | -0.39414        | 2168        | 8.81          | 4.33          | -0.66096        |
| 0.199345        | 4901        | 12.589        | 2.479         | 0.459979        | 2838        | 13.425        | 0.285         | 0.043667        |
| 0.284059        | 4294        | 17.327        | 7.217         | 1.339471        | 1796        | 13.196        | 0.056         | 0.008703        |
| -0.88292        | 4084        | 4.4319        | 5.6781        | -1.05418        | 2745        | 8.7067        | 4.4333        | -0.67674        |
| 0.757869        | 3803        | 15.882        | 5.772         | 1.071243        | 3367        | 19.216        | 6.076         | 0.927855        |
| -0.99108        | 4224        | 9.2566        | 0.8534        | -0.1586         | 2599        | 6.6179        | 6.5221        | -0.99566        |
| -0.79455        | 2208        | 11.549        | 1.439         | 0.266929        | 1009        | 8.5233        | 4.6167        | -0.70474        |
| 0.316253        | 5923        | 22.134        | 12.024        | 2.231772        | 4493        | 20.61         | 7.47          | 1.140695        |
| 0.105689        | 5837        | 14.939        | 4.829         | 0.896198        | 3873        | 6.8939        | 6.2461        | -0.95352        |
| -0.84572        | 4882        | 11.573        | 1.463         | 0.271384        | 4035        | 15.564        | 2.424         | 0.370256        |
| <b>2.258485</b> | <b>5719</b> | <b>20.738</b> | <b>10.628</b> | <b>1.972639</b> | <b>4345</b> | <b>31.807</b> | <b>18.667</b> | <b>2.850286</b> |
| -0.97126        | 2806        | 5.4526        | 4.6574        | -0.86472        | 3285        | 11.233        | 1.907         | -0.29101        |
| 0.464054        | 3484        | 9.4145        | 0.6955        | -0.12929        | 3867        | 20.326        | 7.186         | 1.097333        |
| 1.285174        | 5090        | 13.831        | 3.721         | 0.690526        | 4412        | 29.238        | 16.098        | 2.458043        |
| 0.147151        | 4026        | 9.2648        | 0.8452        | -0.15708        | 3144        | 20.929        | 7.789         | 1.189401        |
| -0.12943        | 4808        | 15.62         | 5.51          | 1.022609        | 2440        | 22.336        | 9.196         | 1.404225        |
| -0.49771        | 4644        | 10.336        | 0.226         | 0.041766        | 3910        | 10.767        | 2.373         | -0.36216        |



|                 |             |               |               |                 |             |               |               |                 |
|-----------------|-------------|---------------|---------------|-----------------|-------------|---------------|---------------|-----------------|
| 1.418667        | 3526        | 14.436        | 4.326         | 0.802829        | 3082        | 16.645        | 3.505         | 0.535307        |
| 0.350399        | 3102        | 8.5751        | 1.5349        | -0.2851         | 2552        | 11.011        | 2.129         | -0.32491        |
| 0.26162         | 2741        | 8.2816        | 1.8284        | -0.33958        | 2708        | 18.131        | 4.991         | 0.762193        |
| 0.424868        | 2208        | 6.7482        | 3.3618        | -0.62422        | 2760        | 15.181        | 2.041         | 0.311779        |
| 1.522567        | 3693        | 11.481        | 1.371         | 0.254307        | 2922        | 16.29         | 3.15          | 0.481104        |
| 0.891687        | 3796        | 8.2192        | 1.8908        | -0.35117        | 3306        | 10.859        | 2.281         | -0.34812        |
| -0.34666        | 4259        | 11.388        | 1.278         | 0.237043        | 2888        | 11.565        | 1.575         | -0.24032        |
| 0.477388        | 3764        | 10.308        | 0.198         | 0.036568        | 2520        | 6.1905        | 6.9495        | -1.06092        |
| 1.31184         | 5196        | 17.379        | 7.269         | 1.349124        | 5036        | 20.929        | 7.789         | 1.189401        |
| 0.140322        | 4458        | 16.061        | 5.951         | 1.10447         | 4018        | 16.202        | 3.062         | 0.467668        |
| 0.549093        | 3516        | 13.766        | 3.656         | 0.67846         | 2609        | 11.614        | 1.526         | -0.23284        |
| -0.23512        | 5039        | 13.713        | 3.603         | 0.668622        | 4541        | 14.644        | 1.504         | 0.229788        |
| -0.19756        | 3099        | 6.486         | 3.624         | -0.67289        | 3300        | 8.697         | 4.443         | -0.67822        |
| -0.42568        | 5226        | 8.6682        | 1.4418        | -0.26782        | 5080        | 12.264        | 0.876         | -0.1336         |
| -0.25333        | 4700        | 14.638        | 4.528         | 0.840325        | 3787        | 16.451        | 3.311         | 0.505686        |
| <b>1.397367</b> | <b>4837</b> | <b>22.328</b> | <b>12.218</b> | <b>2.267783</b> | <b>5111</b> | <b>27.509</b> | <b>14.369</b> | <b>2.194055</b> |
| 0.185199        | 5064        | 10.723        | 0.613         | 0.113603        | 4973        | 17.133        | 3.993         | 0.609816        |
| -0.42568        | 4146        | 10.371        | 0.261         | 0.048263        | 4583        | 19.987        | 6.847         | 1.045573        |
| 0.385845        | 4230        | 15.934        | 5.824         | 1.080895        | 3319        | 24.194        | 11.054        | 1.68791         |
| -0.22276        | 4651        | 14.384        | 4.274         | 0.793176        | 4384        | 17.336        | 4.196         | 0.640811        |
| 0.23658         | 4296        | 10.475        | 0.365         | 0.067568        | 3786        | 18.991        | 5.851         | 0.893501        |
| -0.2091         | 4124        | 7.032         | 3.078         | -0.57154        | 3917        | 18.764        | 5.624         | 0.858842        |
| 0.447144        | 2852        | 10.87         | 0.76          | 0.14089         | 3147        | 15.983        | 2.843         | 0.43423         |
| -0.46324        | 2428        | 8.6903        | 1.4197        | -0.26372        | 2112        | 18.466        | 5.326         | 0.813342        |
| 1.843698        | 4230        | 14.515        | 4.405         | 0.817493        | 3437        | 19.959        | 6.819         | 1.041298        |
| -0.14992        | 3973        | 8.7591        | 1.3509        | -0.25095        | 3899        | 10.464        | 2.676         | -0.40843        |
| -0.00813        | 4208        | 12.452        | 2.342         | 0.434549        | 3355        | 13.92         | 0.78          | 0.119245        |
| -0.28894        | 4083        | 13.691        | 3.581         | 0.664538        | 2999        | 18.806        | 5.666         | 0.865255        |
| 1.658174        | 3679        | 14.841        | 4.731         | 0.878007        | 3432        | 26.719        | 13.579        | 2.073435        |
| 0.829412        | 5912        | 11.553        | 1.443         | 0.267672        | 5796        | 21.601        | 8.461         | 1.292003        |
| -1.52384        | 5155        | 4.4617        | 5.6483        | -1.04865        | 3936        | 5.9959        | 7.1441        | -1.09063        |
| 0.106014        | 3460        | 12.63         | 2.52          | 0.46759         | 3619        | 17.767        | 4.627         | 0.706617        |
| -1.09399        | 2326        | 4.2562        | 5.8538        | -1.0868         | 2020        | 11.485        | 1.655         | -0.25254        |
| -0.85842        | 4684        | 7.3655        | 2.7445        | -0.50963        | 6337        | 12.182        | 0.958         | -0.14612        |
| -0.78257        | 5002        | 11.695        | 1.585         | 0.29403         | 2971        | 16.19         | 3.05          | 0.465836        |
| -0.52226        | 4597        | 13.726        | 3.616         | 0.671035        | 4334        | 23.858        | 10.718        | 1.636609        |
| -0.59625        | 4993        | 5.0471        | 5.0629        | -0.93999        | 3044        | 13.239        | 0.099         | 0.015268        |
| 0.804535        | 5074        | 14.367        | 4.257         | 0.790021        | 3920        | 27.602        | 14.462        | 2.208254        |
| -0.03512        | 5195        | 10.221        | 0.111         | 0.020419        | 4320        | 18.38         | 5.24          | 0.800212        |
| -0.17398        | 4573        | 8.2003        | 1.9097        | -0.35467        | 2818        | 19.092        | 5.952         | 0.908922        |
| -0.13333        | 5306        | 8.6317        | 1.4783        | -0.2746         | 4422        | 14.45         | 1.31          | 0.200167        |
| -0.44828        | 4375        | 7.9543        | 2.1557        | -0.40034        | 3663        | 19.301        | 6.161         | 0.940833        |
| 1.135909        | 3015        | 19.867        | 9.757         | 1.810959        | 2990        | 32.575        | 19.435        | 2.967547        |
| 0.424055        | 4403        | 10.993        | 0.883         | 0.163721        | 2546        | 20.11         | 6.97          | 1.064353        |
| 0.118696        | 3927        | 12.35         | 2.24          | 0.415615        | 3757        | 21.666        | 8.526         | 1.301928        |
| 0.126501        | 5313        | 11.048        | 0.938         | 0.173931        | 2897        | 18.467        | 5.327         | 0.813495        |
| -0.50194        | 3412        | 4.1032        | 6.0068        | -1.1152         | 2016        | 14.831        | 1.691         | 0.25834         |



|                 |             |               |               |                 |             |               |               |                 |
|-----------------|-------------|---------------|---------------|-----------------|-------------|---------------|---------------|-----------------|
| -0.90009        | 4333        | 6.0466        | 4.0634        | -0.75446        | 2961        | 16.076        | 2.936         | 0.44843         |
| 0.604214        | 6910        | 10.188        | 0.078         | 0.014293        | 5755        | 22.832        | 9.692         | 1.479956        |
| 1.140462        | 5516        | 9.6265        | 0.4835        | -0.08994        | 2948        | 19.267        | 6.127         | 0.935641        |
| -0.56454        | 5292        | 11.357        | 1.247         | 0.231289        | 4441        | 19.95         | 6.81          | 1.039924        |
| 0.673968        | 6085        | 9.1701        | 0.9399        | -0.17465        | 5723        | 18.085        | 4.945         | 0.75517         |
| 0.464705        | 3539        | 6.499         | 3.611         | -0.67048        | 2912        | 13.255        | 0.115         | 0.017711        |
| 0.579662        | 5274        | 14.031        | 3.921         | 0.727651        | 4695        | 18.935        | 5.795         | 0.884951        |
| 0.968108        | 4943        | 25.005        | 14.895        | 2.764702        | 4131        | 22.053        | 8.913         | 1.361016        |
| 0.841282        | 4720        | 11.335        | 1.225         | 0.227205        | 4894        | 11.892        | 1.248         | -0.1904         |
| 1.875404        | 5102        | 15.073        | 4.963         | 0.921072        | 4020        | 18.134        | 4.994         | 0.762652        |
| <b>4.842329</b> | <b>5323</b> | <b>26.996</b> | <b>16.886</b> | <b>3.134281</b> | <b>4247</b> | <b>37.203</b> | <b>24.063</b> | <b>3.674164</b> |
| 1.335254        | 5522        | 10.159        | 0.049         | 0.00891         | 4834        | 17.977        | 4.837         | 0.73868         |
| 1.981418        | 5414        | 14.463        | 4.353         | 0.807841        | 3464        | 12.644        | 0.496         | -0.07558        |
| 0.108128        | 3920        | 8.699         | 1.411         | -0.2621         | 2939        | 15.039        | 1.899         | 0.290098        |
| 1.044204        | 5544        | 9.127         | 0.983         | -0.18266        | 3929        | 12.802        | 0.338         | -0.05145        |
| 2.57425         | 3788        | 14.203        | 4.093         | 0.759578        | 3575        | 17.483        | 4.343         | 0.663255        |
| 1.271678        | 4829        | 13.771        | 3.661         | 0.679388        | 3188        | 14.711        | 1.571         | 0.240018        |
| -0.05512        | 4010        | 9.9002        | 0.2098        | -0.03913        | 1947        | 11.505        | 1.635         | -0.24948        |
| 0.75169         | 3936        | 13.592        | 3.482         | 0.646161        | 3673        | 16.553        | 3.413         | 0.52126         |
| 2.316207        | 4647        | 18.937        | 8.827         | 1.638328        | 3728        | 22.988        | 9.848         | 1.503775        |
| 0.677058        | 5553        | 11.795        | 1.685         | 0.312593        | 4313        | 7.744         | 5.396         | -0.82372        |
| -0.15935        | 3419        | 5.2647        | 4.8453        | -0.8996         | 3023        | 11.115        | 2.025         | -0.30903        |
| 0.410397        | 5721        | 15.137        | 5.027         | 0.932952        | 3673        | 15.083        | 1.943         | 0.296816        |
| -1.01355        | 4431        | 7.4024        | 2.7076        | -0.50278        | 4569        | 10.199        | 2.941         | -0.44889        |
| 0.831038        | 3674        | 7.8933        | 2.2167        | -0.41166        | 3890        | 13.342        | 0.202         | 0.030995        |
| 1.228102        | 4445        | 10.191        | 0.081         | 0.01485         | 5730        | 26.457        | 13.317        | 2.033432        |
| 1.351351        | 3114        | 10.308        | 0.198         | 0.036568        | 2723        | 15.498        | 2.358         | 0.360179        |
| <b>2.568397</b> | <b>5170</b> | <b>25.841</b> | <b>15.731</b> | <b>2.919884</b> | <b>4823</b> | <b>23.243</b> | <b>10.103</b> | <b>1.542709</b> |
| 1.516876        | 5380        | 14.498        | 4.388         | 0.814338        | 3677        | 13.68         | 0.54          | 0.082601        |
| 1.377692        | 5834        | 19.901        | 9.791         | 1.817271        | 3833        | 15.132        | 1.992         | 0.304297        |
| 1.178835        | 6071        | 11.184        | 1.074         | 0.199176        | 4343        | 10.868        | 2.272         | -0.34674        |
| -0.20682        | 4553        | 11.136        | 1.026         | 0.190266        | 2843        | 10.095        | 3.045         | -0.46477        |
| <b>6.565704</b> | <b>4595</b> | <b>45.419</b> | <b>35.309</b> | <b>6.554054</b> | <b>4311</b> | <b>53.932</b> | <b>40.792</b> | <b>6.228397</b> |
| 1.978654        | 4974        | 8.2027        | 1.9073        | -0.35423        | 2893        | 17.283        | 4.143         | 0.632718        |
| 2.663029        | 5556        | 15.137        | 5.027         | 0.932952        | 4189        | 18.859        | 5.719         | 0.873347        |
| 2.734897        | 4214        | 17.964        | 7.854         | 1.457715        | 4464        | 22.267        | 9.127         | 1.39369         |
| <b>2.448237</b> | <b>3952</b> | <b>21.255</b> | <b>11.145</b> | <b>2.068607</b> | <b>3128</b> | <b>30.882</b> | <b>17.742</b> | <b>2.709054</b> |
| -0.28341        | 4276        | 5.8466        | 4.2634        | -0.79158        | 2741        | 13.061        | 0.079         | -0.01191        |
| 3.392606        | 4631        | 14.489        | 4.379         | 0.812667        | 3980        | 25.352        | 12.212        | 1.864717        |
| 0.714618        | 4896        | 11.029        | 0.919         | 0.170404        | 3499        | 13.547        | 0.407         | 0.062295        |
| 1.519478        | 6594        | 14.998        | 4.888         | 0.90715         | 4331        | 17.825        | 4.685         | 0.715472        |
| 2.204015        | 6909        | 18.527        | 8.417         | 1.562222        | 5009        | 20.723        | 7.583         | 1.157948        |
| 1.439479        | 6383        | 8.554         | 1.556         | -0.28902        | 5172        | 15.526        | 2.386         | 0.364454        |
| 1.092821        | 5549        | 6.9923        | 3.1177        | -0.57891        | 4070        | 8.9681        | 4.1719        | -0.63683        |
| 0.023089        | 4491        | 4.8987        | 5.2113        | -0.96753        | 3490        | 7.765         | 5.375         | -0.82052        |
| -0.06146        | 2444        | 2.7414        | 7.3686        | -1.36798        | 3486        | 5.7659        | 7.3741        | -1.12575        |
| 0.201621        | 3603        | 6.0228        | 4.0872        | -0.75887        | 2635        | 15.787        | 2.647         | 0.404305        |

|                 |             |               |               |                 |             |               |               |                 |
|-----------------|-------------|---------------|---------------|-----------------|-------------|---------------|---------------|-----------------|
| 0.446982        | 3824        | 13.363        | 3.253         | 0.603653        | 2221        | 24.403        | 11.263        | 1.719821        |
| -0.32324        | 4575        | 8.5027        | 1.6073        | -0.29854        | 3140        | 18.885        | 5.745         | 0.877316        |
| 0.160484        | 4708        | 10.918        | 0.808         | 0.1498          | 4129        | 20.586        | 7.446         | 1.13703         |
| -1.34527        | 3311        | 11.024        | 0.914         | 0.169476        | 1594        | 28.921        | 15.781        | 2.409643        |
| -0.04455        | 5319        | 13.612        | 3.502         | 0.649874        | 3638        | 23.2          | 10.06         | 1.536144        |
| -0.31007        | 5217        | 10.063        | 0.047         | -0.00891        | 2639        | 11.709        | 1.431         | -0.21834        |
| <b>2.073286</b> | <b>6581</b> | <b>14.77</b>  | <b>4.66</b>   | <b>0.864828</b> | <b>4192</b> | <b>31.083</b> | <b>17.943</b> | <b>2.739744</b> |
| 0.136907        | 5062        | 9.7787        | 0.3313        | -0.06168        | 2948        | 22.558        | 9.418         | 1.438121        |
| -0.72876        | 4465        | 6.2262        | 3.8838        | -0.72112        | 2933        | 15.274        | 2.134         | 0.325978        |
| -0.34455        | 3385        | 10.192        | 0.082         | 0.015036        | 2139        | 16.924        | 3.784         | 0.577905        |
| -1.33883        | 4763        | 3.4852        | 6.6248        | -1.22992        | 2808        | 5.9829        | 7.1571        | -1.09261        |
| <b>2.867414</b> | <b>2937</b> | <b>26.83</b>  | <b>16.72</b>  | <b>3.103467</b> | <b>1618</b> | <b>39.926</b> | <b>26.786</b> | <b>4.089919</b> |
| -0.27967        | 4478        | 10.027        | 0.083         | -0.01559        | 2474        | 19.038        | 5.898         | 0.900677        |
| -0.52129        | 5873        | 8.7179        | 1.3921        | -0.25859        | 4556        | 12.599        | 0.541         | -0.08245        |
| -0.1304         | 4859        | 7.7588        | 2.3512        | -0.43663        | 3058        | 9.6795        | 3.4605        | -0.52821        |
| 0.211702        | 6814        | 16.363        | 6.253         | 1.160529        | 5361        | 23.391        | 10.251        | 1.565306        |
| -0.98742        | 4503        | 9.4382        | 0.6718        | -0.12489        | 2897        | 13.738        | 0.598         | 0.091457        |
| 0.847623        | 4823        | 11.611        | 1.501         | 0.278438        | 4877        | 22.473        | 9.333         | 1.425143        |
| -0.45706        | 3889        | 7.1227        | 2.9873        | -0.5547         | 2742        | 15.937        | 2.797         | 0.427207        |
| <b>2.289704</b> | <b>5011</b> | <b>21.912</b> | <b>11.802</b> | <b>2.190563</b> | <b>3856</b> | <b>24.326</b> | <b>11.186</b> | <b>1.708065</b> |
| 0.121298        | 4141        | 8.6453        | 1.4647        | -0.27207        | 3424        | 13.668        | 0.528         | 0.080769        |
| -0.58633        | 3479        | 10.721        | 0.611         | 0.113231        | 2267        | 20.026        | 6.886         | 1.051528        |
| 0.637709        | 4914        | 20.228        | 10.118        | 1.87797         | 3235        | 20.495        | 7.355         | 1.123136        |
| 1.06274         | 4800        | 22            | 11.89         | 2.206898        | 2290        | 12.009        | 1.131         | -0.17253        |
| 0.339992        | 3523        | 11.24         | 1.13          | 0.209571        | 1721        | 13.887        | 0.747         | 0.114207        |
| -0.56958        | 4048        | 11.438        | 1.328         | 0.246325        | 3170        | 12.114        | 1.026         | -0.1565         |
| <b>1.275418</b> | <b>4013</b> | <b>27.162</b> | <b>17.052</b> | <b>3.165095</b> | <b>3822</b> | <b>28.441</b> | <b>15.301</b> | <b>2.336355</b> |
| -0.44584        | 3984        | 11.797        | 1.687         | 0.312964        | 2201        | 7.3149        | 5.8251        | -0.88924        |
| 0.434462        | 2745        | 19.563        | 9.453         | 1.754529        | 1341        | 21.626        | 8.486         | 1.295821        |
| 0.482428        | 4499        | 14.914        | 4.804         | 0.891558        | 2846        | 15.355        | 2.215         | 0.338346        |
| 0.807136        | 4586        | 9.4854        | 0.6246        | -0.11613        | 3595        | 11.127        | 2.013         | -0.3072         |
| 0.16585         | 5350        | 20.579        | 10.469        | 1.943124        | 3180        | 17.767        | 4.627         | 0.706617        |
| -0.56942        | 4421        | 5.3382        | 4.7718        | -0.88595        | 4124        | 10.766        | 2.374         | -0.36232        |
| -0.30796        | 4972        | 15.447        | 5.337         | 0.990496        | 3146        | 12.715        | 0.425         | -0.06474        |
| -0.31967        | 2673        | 10.625        | 0.515         | 0.095411        | 2931        | 12.112        | 1.028         | -0.15681        |
| -0.52145        | 4098        | 10.2          | 0.09          | 0.016521        | 2822        | 9.4968        | 3.6432        | -0.5561         |
| 0.316741        | 4094        | 14.24         | 4.13          | 0.766446        | 3764        | 14.506        | 1.366         | 0.208718        |
| -0.07821        | 1995        | 18.095        | 7.985         | 1.482031        | 2115        | 17.967        | 4.827         | 0.737153        |
| -1.33077        | 2566        | 7.4045        | 2.7055        | -0.50239        | 3242        | 10.364        | 2.776         | -0.4237         |
|                 | 3943.5      | 10.111        | 3.64          |                 | 3462        | 13.139        | 4.42535       |                 |
|                 |             |               | 7.28          |                 |             |               | 8.8507        |                 |
|                 |             |               | 10.92         |                 |             |               | 13.27605      |                 |
|                 |             |               | 5.3872        |                 |             |               | 6.549518      |                 |
| 3971            | 48.25       |               | 2960          | 50.574          |             |               |               |                 |
| 4660            | 37.897      |               | 4455          | 43.098          |             |               |               |                 |
| 4208            | 36.145      |               | 3454          | 30.602          |             |               |               |                 |
| 4433            | 46.785      |               | 5347          | 51.506          |             |               |               |                 |

|          |          |          |          |
|----------|----------|----------|----------|
| 4318     | 42.26925 | 4054     | 43.945   |
| 295.9155 | 6.131459 | 1062.934 | 9.658596 |
| 1341     | 5.742    | 1491     | 6.7069   |
| 1526     | 7.1429   | 1725     | 9.7971   |
| 1664     | 8.2332   | 1358     | 14.728   |
| 2285     | 11.291   | 2071     | 11.106   |
| 1825     | 8.889033 | 1718     | 11.87703 |
| 404.3031 | 2.150412 | 356.5515 | 2.554273 |
|          | 0        |          | 28.97579 |
|          | 6.451236 |          | 7.66282  |
|          | 6.451236 |          | 36.63861 |
|          | 33.38022 |          | 32.06797 |
|          | 0.193265 |          | 1.14253  |
|          | 0.806735 |          | -0.14253 |

|      |        |      |        |
|------|--------|------|--------|
| 397  | 2.267  | 448  | 15.402 |
| 462  | 6.4935 | 271  | 26.199 |
| 3587 | 10.315 | 4492 | 13.446 |
| 4859 | 11.196 | 4016 | 22.46  |
| 7739 | 27.329 | 6945 | 29.057 |
| 7007 | 24.647 | 7212 | 34.068 |



y

y

y

y

y

y

y



y

y

y

y

y

y

y

y

|           |                         |                 | cell ct | % inf  | AD      |
|-----------|-------------------------|-----------------|---------|--------|---------|
| 50067 A02 | M-004735- transketola   | 84076 TKTL2     | 4482    | 11.334 | 7.506   |
| 50067 A04 | M-018597- chromoson     | 84075 C14orf155 | 3939    | 16.349 | 2.491   |
| 50067 A05 | M-007322- solute carri  | 83447 SLC25A31  | 4472    | 10.711 | 8.129   |
| 50067 A06 | M-014787- glutamine r   | 84074 QRICH2    | 3341    | 14.098 | 4.742   |
| 50067 A07 | M-014709- pseudouric    | 83448 PUS7L     | 4476    | 12.913 | 5.927   |
| 50067 A08 | M-016346- MYCBP ass     | 84073 MYCBPAP   | 3712    | 15.194 | 3.646   |
| 50067 A09 | M-014710- polyamine     | 83449 PMFBP1    | 4065    | 12.374 | 6.466   |
| 50067 A10 | M-018596- HORMA do      | 84072 HORMAD1   | 3189    | 15.553 | 3.287   |
| 50067 A11 | M-019419- leucine ric   | 83450 LRRC48    | 3585    | 27.364 | 8.524   |
| 50067 A12 | M-018191- armadillo r   | 84071 ARMC2     | 3828    | 22.048 | 3.208   |
| 50067 A13 | M-007082- hypothetic    | 83459 DKFZP761F | 3137    | 19.318 | 0.478   |
| 50067 A14 | M-014786- chromoson     | 84070 C12orf25  | 3433    | 16.633 | 2.207   |
| 50067 A15 | M-014711- transmemk     | 83460 TMEM93    | 3489    | 22.356 | 3.516   |
| 50067 A16 | M-014785- pleckstrin h  | 84069 PLEKHN1   | 4332    | 24.492 | 5.652   |
| 50067 A17 | M-016149- cell divisior | 83461 CDCA3     | 4839    | 14.3   | 4.54    |
| 50067 A18 | M-014784- solute carri  | 84068 SLC10A7   | 3502    | 13.649 | 5.191   |
| 50067 A19 | M-008827- MAX dimer     | 83463 MXD3      | 3058    | 13.734 | 5.106   |
| 50067 A20 | M-014783- chromoson     | 84067 C11orf56  | 4219    | 23.536 | 4.696   |
| 50067 A21 | M-008061- anterior ph   | 83464 APH1B     | 3922    | 18.511 | 0.329   |
| 50067 A23 | M-016679- glycosyltra   | 83468 GLT8D2    | 4763    | 21.163 | 2.323   |
| 50067 B02 | M-009755- coenzyme r    | 84274 COQ5      | 5639    | 24.88  | 6.04    |
| 50067 B04 | M-013518- keratin assi  | 83899 KRTAP9-2  | 5467    | 16.59  | 2.25    |
| 50067 B05 | M-018600- chromoson     | 84077 C3orf20   | 5344    | 11.808 | 7.032   |
| 50067 B06 | M-013500- keratin assi  | 83755 KRTAP4-12 | 5057    | 12.32  | 6.52    |
| 50067 B07 | M-015708- kelch repea   | 84078 KBTBD7    | 3844    | 13.476 | 5.364   |
| 50067 B08 | M-014881- zinc finger,  | 84327 ZBED3     | 3785    | 8.0845 | 10.7555 |
| 50067 B09 | M-014788- ankyrin rep   | 84079 ANKRD27   | 2279    | 9.1707 | 9.6693  |
| 50067 B10 | M-017010- hypothetic    | 84326 MGC13114  | 3784    | 9.8309 | 9.0091  |
| 50067 B11 | M-014789- chromoson     | 84080 C16orf48  | 4061    | 14.627 | 4.213   |
| 50067 B12 | M-008575- componen      | 84342 COG8      | 3930    | 16.718 | 2.122   |
| 50067 B13 | M-014790- coiled-coil   | 84081 CCDC55    | 3978    | 14.706 | 4.134   |
| 50067 B14 | M-017534- G elongatic   | 84340 GFM2      | 3394    | 12.11  | 6.73    |
| 50067 B15 | M-010025- zinc finger,  | 84083 ZRANB3    | 3754    | 22.456 | 3.616   |
| 50067 B16 | M-014888- elongation    | 84337 ELOF1     | 3739    | 23.562 | 4.722   |
| 50067 B17 | M-021407- F-box prote   | 84085 FBXO30    | 3293    | 18.524 | 0.316   |
| 50067 B18 | M-014887- transmemk     | 84336 TMEM101   | 3281    | 13.167 | 5.673   |
| 50067 B19 | M-017298- ADP-ribosy    | 84100 ARL6      | 5270    | 11.575 | 7.265   |
| 50067 B20 | M-014885- chromoson     | 84334 C14orf153 | 4681    | 25.272 | 6.432   |
| 50067 B21 | M-007321- solute carri  | 84102 SLC41A2   | 5609    | 9.8057 | 9.0343  |
| 50067 B23 | M-014791- chromoson     | 84103 C4orf17   | 5713    | 29.914 | 11.074  |
| 50067 C02 | M-014782- chromoson     | 84066 C1orf49   | 3940    | 15.305 | 3.535   |
| 50067 C04 | M-014781- chromoson     | 84065 C1orf160  | 5106    | 18.273 | 0.567   |
| 50067 C05 | M-014712- deoxyhyphu    | 83475 DOHH      | 4789    | 17.979 | 0.861   |
| 50067 C06 | M-018923- kin of IRRE   | 84063 KIRREL2   | 4379    | 18.589 | 0.251   |
| 50067 C07 | M-014713- Rho GTPas     | 83478 ARHGAP24  | 3784    | 18.155 | 0.685   |
| 50067 C08 | M-018190- implantatic   | 84061 RP11-217H | 3508    | 22.577 | 3.737   |

|                  |                            |                      |             |              |              |
|------------------|----------------------------|----------------------|-------------|--------------|--------------|
| 50067 C09        | M-009916- DEAD (Asp-       | 83479 DDX59          | 3130        | 12.78        | 6.06         |
| 50067 C10        | M-014780- hypothetical     | 84060 DKFZP564C      | 3605        | 22.469       | 3.629        |
| 50067 C11        | M-009748- pseudouric       | 83480 PUS3           | 3326        | 31.269       | 12.429       |
| 50067 C12        | M-018961- WD repeat        | 84058 WDR54          | 3034        | 21.358       | 2.518        |
| 50067 C13        | M-013490- scratch hor      | 83482 SCRT1          | 2818        | 33.286       | 14.446       |
| 50067 C14        | M-014779- meiotic nu       | 84057 MND1           | 3181        | 13.329       | 5.511        |
| 50067 C15        | M-014714- plasmalem        | 83483 PLVAP          | 3239        | 21.025       | 2.185        |
| 50067 C16        | M-014778- katanin p6       | 84056 KATNAL1        | 4367        | 25.647       | 6.807        |
| 50067 C17        | M-014719- tetratricop      | 83538 TTC25          | 4004        | 12.188       | 6.652        |
| 50067 C18        | M-014777- elastin mic      | 84034 EMILIN2        | 4026        | 14.655       | 4.185        |
| 50067 C19        | M-008532- carbohydra       | 83539 CHST9          | 4116        | 8.1633       | 10.6767      |
| 50067 C20        | M-008985- UDP-GlcNA        | 84002 B3GNT5         | 5803        | 20.558       | 1.718        |
| 50067 C21        | M-015441- family with      | 83541 FAM110A        | 4825        | 17.637       | 1.203        |
| 50067 C23        | M-014721- chromoson        | 83543 C9orf58        | 4400        | 23.341       | 4.501        |
| 50067 D02        | M-007089- polycomb ξ       | 84333 PCGF5          | 5527        | 18.69        | 0.15         |
| 50067 D04        | M-014884- DPY30 dom        | 84332 DYDC2          | 3294        | 10.413       | 8.427        |
| 50067 D05        | M-009955- pterin-4 alq     | 84105 PCBD2          | 4188        | 10.888       | 7.952        |
| 50067 D06        | M-010968- chromoson        | 84331 C16orf14       | 5209        | 17.124       | 1.716        |
| 50067 D07        | M-018654- PML-RARA         | 84106 PRAM1          | 4099        | 30.105       | 11.265       |
| 50067 D08        | M-014882- zinc finger      | 84330 ZNF414         | 3476        | 19.045       | 0.205        |
| 50067 D09        | M-017509- Zic family n     | 84107 ZIC4           | 4360        | 26.606       | 7.766        |
| 50067 D10        | M-006282- hydrogen v       | 84329 HVCN1          | 4177        | 19.033       | 0.193        |
| 50067 D11        | M-007084- polycomb ξ       | 84108 PCGF6          | 4345        | 21.611       | 2.771        |
| 50067 D12        | M-016918- leucine zip      | 84328 LZIC           | 3630        | 15.041       | 3.799        |
| 50067 D13        | M-010746- G protein-c      | 84109 GPR103         | 4263        | 6.6854       | 12.1546      |
| 50067 D14        | M-015061- cytokine in      | 84324 CIP29          | 3141        | 17.638       | 1.202        |
| 50067 D15        | M-018995- zinc finger      | 84124 ZNF394         | 3391        | 14.686       | 4.154        |
| 50067 D16        | M-014879- THO compl        | 84321 THOC3          | 4188        | 19.628       | 0.788        |
| 50067 D17        | M-014794- RUN doma         | 84127 RUNDC2A        | 3394        | 7.5133       | 11.3267      |
| 50067 D18        | M-014878- chromoson        | 84319 C3orf26        | 4715        | 21.866       | 3.026        |
| 50067 D19        | M-014795- WD repeat        | 84128 WDR75          | 4717        | 10.854       | 7.986        |
| 50067 D20        | M-014877- coiled-coil      | 84318 CCDC77         | 5108        | 8.9272       | 9.9128       |
| 50067 D21        | M-008129- acyl-Coenz'      | 84129 ACAD11         | 5439        | 22.835       | 3.995        |
| 50067 D23        | M-026005- centrosom.       | 84131 CEP78          | 5294        | 17.303       | 1.537        |
| 50067 E02        | M-005973- transmemk        | 84000 TMPRSS13       | 6188        | 12.427       | 6.413        |
| 50067 E04        | M-013538- regeneratir      | 83998 REG4           | 4058        | 14.49        | 4.35         |
| 50067 E05        | M-014722- dynein, axc      | 83544 DNAL1          | 5017        | 26.37        | 7.53         |
| 50067 E06        | M-015103- cortactin b      | 83992 CTTNBP2        | 5010        | 21.178       | 2.338        |
| 50067 E07        | M-014723- retbindin        | 83546 RTBDN          | 4008        | 20.259       | 1.419        |
| <b>50067 E08</b> | <b>M-016828- chromoson</b> | <b>83989 C5orf21</b> | <b>4241</b> | <b>37.02</b> | <b>18.18</b> |
| 50067 E09        | M-008787- Rab interac      | 83547 RILP           | 4359        | 24.18        | 5.34         |
| 50067 E10        | M-014776- neurocalcir      | 83988 NCALD          | 3817        | 22.95        | 4.11         |
| 50067 E11        | M-013499- componen         | 83548 COG3           | 4296        | 29.702       | 10.862       |
| 50067 E12        | M-014775- coiled-coil      | 83987 CCDC8          | 1472        | 27.649       | 8.809        |
| 50067 E13        | M-010745- membrane         | 83552 MFRP           | 2691        | 21.293       | 2.453        |
| 50067 E14        | M-014774- integrin alq     | 83986 ITFG3          | 3942        | 22.019       | 3.179        |
| 50067 E15        | M-018578- transmemk        | 83590 TMUB1          | 3035        | 18.682       | 0.158        |

|                  |                             |                       |             |               |               |
|------------------|-----------------------------|-----------------------|-------------|---------------|---------------|
| 50067 E16        | M-003987- spinster ho       | 83985 SPNS1           | 4032        | 37.326        | 18.486        |
| 50067 E17        | M-014725- THAP doma         | 83591 THAP2           | 4267        | 27.537        | 8.697         |
| 50067 E18        | M-014773- family with       | 83982 FAM14A          | 3772        | 17.63         | 1.21          |
| 50067 E19        | M-021354- nudix (nucl       | 83594 NUDT12          | 4808        | 29.264        | 10.424        |
| 50067 E20        | M-007581- solute carri      | 83959 SLC4A11         | 5472        | 23.41         | 4.57          |
| 50067 E21        | M-019017- SRY (sex de       | 83595 SOX7            | 5358        | 20.605        | 1.765         |
| 50067 E23        | M-017207- BCL2-like 1       | 83596 BCL2L12         | 5523        | 16.386        | 2.454         |
| 50067 F02        | M-017006- coiled-coil       | 84317 CCDC115         | 5667        | 13.182        | 5.658         |
| <b>50067 F04</b> | <b>M-014876- LSM domai</b>  | <b>84316 LSMD1</b>    | <b>5709</b> | <b>32.317</b> | <b>13.477</b> |
| 50067 F05        | M-010747- zinc and rir      | 84133 ZNRF3           | 5730        | 14.066        | 4.774         |
| 50067 F06        | M-014875- MON1 hor          | 84315 MON1A           | 5668        | 27.1          | 8.26          |
| 50067 F07        | M-016907- translocase       | 84134 TOMM40L         | 4672        | 20.655        | 1.815         |
| 50067 F08        | M-010979- transmemk         | 84314 TMEM107         | 3443        | 25.908        | 7.068         |
| 50067 F09        | M-014796- UTP15, U3         | 84135 UTP15           | 3263        | 6.7423        | 12.0977       |
| 50067 F10        | M-004699- vacuolar pr       | 84313 VPS25           | 4082        | 20.725        | 1.885         |
| 50067 F11        | M-014797- likely ortho      | 84137 PHAX            | 5212        | 25.902        | 7.062         |
| 50067 F12        | M-014874- breast canc       | 84312 BRMS1L          | 3048        | 12.762        | 6.078         |
| 50067 F13        | M-014798- solute carri      | 84138 SLC7A6OS        | 3933        | 12.764        | 6.076         |
| 50067 F14        | M-019256- mitochond         | 84311 MRPL45          | 3690        | 16.098        | 2.742         |
| 50067 F15        | M-022697- hypothetic        | 84140 FLJ13305        | 3789        | 14.225        | 4.615         |
| 50067 F16        | M-014873- hypothetic        | 84310 MGC11257        | 3979        | 26.967        | 8.127         |
| 50067 F17        | M-014799- transmemk         | 84141 TMEM166         | 4550        | 14.703        | 4.137         |
| 50067 F18        | M-014872- nudix (nucl       | 84309 NUDT16L1        | 4956        | 14.911        | 3.929         |
| 50067 F19        | M-016775- coiled-coil       | 84142 CCDC98          | 6754        | 32.322        | 13.482        |
| 50067 F20        | M-014871- limitrin          | 84308 MGC3047         | 6551        | 20.119        | 1.279         |
| 50067 F21        | M-021617- synapse de        | 84144 SYDE2           | 5396        | 14.066        | 4.774         |
| 50067 F23        | M-007085- zinc finger       | 84146 ZNF644          | 6086        | 20.358        | 1.518         |
| 50067 G02        | M-014771- FKSG43 ger        | 83957 FKSG43          | 4955        | 5.7921        | 13.0479       |
| 50067 G04        | M-006842- Rac GTPase        | 83956 RACGAP1P        | 4162        | 26.766        | 7.926         |
| 50067 G05        | M-014727- receptor (c       | 83597 RTP3            | 5565        | 31.123        | 12.283        |
| 50067 G06        | M-014770- nascent-po        | 83955 NACAP1          | 4850        | 18.082        | 0.758         |
| 50067 G07        | M-021352- transmemk         | 83604 TMEM47          | 4507        | 14            | 4.84          |
| 50067 G08        | M-014768- Fc receptor       | 83953 FCAMR           | 3736        | 13.33         | 5.51          |
| 50067 G09        | M-014728- cerebral ca       | 83605 CCM2            | 5373        | 15.615        | 3.225         |
| <b>50067 G10</b> | <b>M-005902- IMP2 inner</b> | <b>83943 IMMMP2L</b>  | <b>4845</b> | <b>36.388</b> | <b>17.548</b> |
| 50067 G11        | M-031449- chromoson         | 83606 C22orf13        | 4333        | 20.194        | 1.354         |
| 50067 G12        | M-013536- TM2 doma          | 83941 TM2D1           | 4088        | 19.643        | 0.803         |
| 50067 G13        | M-014729- AMME chro         | 83607 AMMECR1l        | 3389        | 12.6          | 6.24          |
| 50067 G14        | M-014767- TatD DNase        | 83940 TATDN1          | 2623        | 25.658        | 6.818         |
| 50067 G15        | M-016886- chromoson         | 83608 C18orf21        | 4870        | 20.821        | 1.981         |
| 50067 G16        | M-014766- eukaryotic        | 83939 EIF2A           | 4745        | 16.354        | 2.486         |
| 50067 G17        | M-014731- chromoson         | 83636 C19orf12        | 5022        | 27.758        | 8.918         |
| <b>50067 G18</b> | <b>M-014765- chromoson</b>  | <b>83938 C10orf11</b> | <b>5428</b> | <b>47.126</b> | <b>28.286</b> |
| 50067 G19        | M-025325- zinc finger,      | 83637 ZMIZ2           | 4870        | 18.686        | 0.154         |
| 50067 G20        | M-017587- Ras associa       | 83937 RASSF4          | 4562        | 26.282        | 7.442         |
| 50067 G21        | M-016160- testis expre      | 83639 TEX101          | 5009        | 17.728        | 1.112         |
| 50067 G23        | M-021286- family with       | 83640 FAM103A1        | 5697        | 15.552        | 3.288         |

|           |                        |                 |      |        |         |
|-----------|------------------------|-----------------|------|--------|---------|
| 50067 H02 | M-014870- zinc finger  | 84307 ZNF397    | 6179 | 20.489 | 1.649   |
| 50067 H04 | M-014869- programme    | 84306 PDCD2L    | 5168 | 24.787 | 5.947   |
| 50067 H05 | M-014800- MYST histo   | 84148 MYST1     | 4372 | 46.317 | 27.477  |
| 50067 H06 | M-014868- within bgcr  | 84305 WIBG      | 4340 | 14.171 | 4.669   |
| 50067 H07 | M-014801- ribonuclea   | 84153 RNASEH2C  | 5094 | 31.429 | 12.589  |
| 50067 H08 | M-014867- nudix (nucl  | 84304 NUDT22    | 4076 | 8.0716 | 10.7684 |
| 50067 H09 | M-024715- brix domai   | 84154 BXDC1     | 4419 | 20.502 | 1.662   |
| 50067 H10 | M-014866- coiled-coil- | 84303 CHCHD6    | 5222 | 18.211 | 0.629   |
| 50067 H11 | M-028249- KIAA1109     | 84162 KIAA1109  | 5278 | 19.723 | 0.883   |
| 50067 H12 | M-021290- chromoson    | 84300 C6orf125  | 3881 | 22.778 | 3.938   |
| 50067 H13 | M-016458- activating s | 84164 ASCC2     | 3492 | 19.158 | 0.318   |
| 50067 H14 | M-014864- chromoson    | 84299 C17orf37  | 3933 | 19.502 | 0.662   |
| 50067 H15 | M-018267- NLR family,  | 84166 NLRC5     | 4321 | 12.381 | 6.459   |
| 50067 H16 | M-018613- chromoson    | 84298 C12orf31  | 4752 | 35.816 | 16.976  |
| 50067 H17 | M-014802- chromoson    | 84167 C19orf44  | 4057 | 16.564 | 2.276   |
| 50067 H18 | M-014863- GINS comp    | 84296 GINS4     | 4834 | 23.397 | 4.557   |
| 50067 H19 | M-010679- anthrax tox  | 84168 ANTXR1    | 5533 | 25.357 | 6.517   |
| 50067 H20 | M-014861- chromoson    | 84294 C8orf53   | 5687 | 15.966 | 2.874   |
| 50067 H21 | M-008022- lysyl oxidas | 84171 LOXL4     | 6660 | 26.727 | 7.887   |
| 50067 H23 | M-013391- polymerase   | 84172 POLR1B    | 5724 | 20.65  | 1.81    |
| 50067 I02 | M-015442- chromoson    | 83932 C1orf124  | 4862 | 18.326 | 0.514   |
| 50067 I04 | M-018591- STARD3 N-    | 83930 STARD3NL  | 6528 | 13.312 | 5.528   |
| 50067 I05 | M-014732- family with  | 83641 FAM107B   | 4649 | 18.327 | 0.513   |
| 50067 I06 | M-013521- keratin assi | 83902 KRTAP17-1 | 5611 | 9.4101 | 9.4299  |
| 50067 I07 | M-009396- selenoprot   | 83642 RP3-402G1 | 5219 | 10.979 | 7.861   |
| 50067 I08 | M-013519- keratin assi | 83900 KRTAP9-3  | 5838 | 6.0123 | 12.8277 |
| 50067 I09 | M-018943- coiled-coil  | 83643 CCDC3     | 4943 | 17.297 | 1.543   |
| 50067 I10 | M-013517- keratin assi | 83897 KRTAP3-2  | 4887 | 6.9777 | 11.8623 |
| 50067 I11 | M-015197- chromoson    | 83648 C8orf13   | 5066 | 15.101 | 3.739   |
| 50067 I12 | M-013516- keratin assi | 83896 KRTAP3-1  | 3419 | 11.582 | 7.258   |
| 50067 I13 | M-012899- acyl-malon   | 83650 AMAC1L2   | 5118 | 22.118 | 3.278   |
| 50067 I14 | M-013515- keratin assi | 83895 KRTAP1-5  | 5109 | 12.214 | 6.626   |
| 50067 I15 | M-025874- chromoson    | 83652 C8orf7    | 5401 | 20.348 | 1.508   |
| 50067 I16 | M-014763- tetratricop  | 83894 TTC29     | 4459 | 15.699 | 3.141   |
| 50067 I17 | M-015204- chromoson    | 83655 C8orf14   | 5752 | 23.644 | 4.804   |
| 50067 I18 | M-014762- spermatog    | 83893 SPATA16   | 4569 | 10.79  | 8.05    |
| 50067 I19 | M-015198- chromoson    | 83656 C8orf12   | 6572 | 24.422 | 5.582   |
| 50067 I20 | M-018189- potassium    | 83892 KCTD10    | 5286 | 14.321 | 4.519   |
| 50067 I21 | M-012921- tektin 1     | 83659 TEKT1     | 6780 | 18.569 | 0.271   |
| 50067 I23 | M-012909- talin 2      | 83660 TLN2      | 5013 | 18.352 | 0.488   |
| 50067 J02 | M-010680- chromoson    | 84293 C10orf58  | 5119 | 34.265 | 15.425  |
| 50067 J04 | M-014860- mitogen-ac   | 84292 MORG1     | 4357 | 18.981 | 0.141   |
| 50067 J05 | M-019225- Src-like-ada | 84174 SLA2      | 6619 | 26.031 | 7.191   |
| 50067 J06 | M-014859- hypothetic   | 84291 MGC2408   | 6346 | 29.751 | 10.911  |
| 50067 J07 | M-028916- myosin, he   | 84176 MYH16     | 5135 | 19.241 | 0.401   |
| 50067 J08 | M-014858- calpain, sm  | 84290 CAPNS2    | 4271 | 22.735 | 3.895   |
| 50067 J09 | M-018602- major facili | 84179 MFSD7     | 5259 | 26.659 | 7.819   |

|           |                         |                |      |        |        |
|-----------|-------------------------|----------------|------|--------|--------|
| 50067 J10 | M-007088- inhibitor of  | 84289 ING5     | 3933 | 31.808 | 12.968 |
| 50067 J11 | M-017349- chromodor     | 84181 CHD6     | 4610 | 33.297 | 14.457 |
| 50067 J12 | M-014857- EF-hand ca    | 84288 EFCAB2   | 3349 | 28.635 | 9.795  |
| 50067 J13 | M-025310- hypothetic    | 84182 FLJ22374 | 3885 | 20.438 | 1.598  |
| 50067 J14 | M-021403- zinc finger,  | 84287 ZDHHC16  | 4710 | 29.193 | 10.353 |
| 50067 J15 | M-014804- zinc finger,  | 84186 ZCCHC7   | 4083 | 30.345 | 11.505 |
| 50067 J16 | M-014856- transmemk     | 84286 TMEM175  | 4905 | 20.367 | 1.527  |
| 50067 J17 | M-014805- transmemk     | 84187 TMEM164  | 5053 | 28.735 | 9.895  |
| 50067 J18 | M-018192- hypothetic    | 84285 MGC11102 | 5607 | 35.135 | 16.295 |
| 50067 J19 | M-014806- male sterili  | 84188 MLSTD2   | 6865 | 30.022 | 11.182 |
| 50067 J20 | M-006805- chromoson     | 84284 C1orf57  | 4870 | 22.197 | 3.357  |
| 50067 J21 | M-004305- SLIT and N1   | 84189 SLITRK6  | 4899 | 15.717 | 3.123  |
| 50067 J23 | M-026900- chromoson     | 84190 C12orf26 | 5685 | 26.895 | 8.055  |
| 50067 K02 | M-014761- sorting nex   | 83891 SNX25    | 4142 | 27.33  | 8.49   |
| 50067 K04 | M-014760- spermatog     | 83890 SPATA9   | 4222 | 12.577 | 6.263  |
| 50067 K05 | M-014734- poly (ADP-i   | 83666 PARP9    | 4711 | 32.987 | 14.147 |
| 50067 K06 | M-031103- WD repeat     | 83889 WDR87    | 4795 | 21.105 | 2.265  |
| 50067 K07 | M-019134- sestrin 2     | 83667 SESN2    | 5911 | 21.215 | 2.375  |
| 50067 K08 | M-018587- fibroblast g  | 83888 FGFBP2   | 4079 | 17.235 | 1.605  |
| 50067 K09 | M-016681- cysteine-ric  | 83690 CRISPLD1 | 4194 | 21.102 | 2.262  |
| 50067 K10 | M-018585- tubulin tyrc  | 83887 TTL2     | 4440 | 22.297 | 3.457  |
| 50067 K11 | M-014735- CD99 mole     | 83692 CD99L2   | 5306 | 22.654 | 3.814  |
| 50067 K12 | M-005971- protease, s   | 83886 PRSS27   | 4448 | 13.422 | 5.418  |
| 50067 K13 | M-004788- hydroxyste    | 83693 HSDL1    | 4461 | 23.223 | 4.383  |
| 50067 K14 | M-007479- solute carri  | 83884 SLC25A2  | 4381 | 17.051 | 1.789  |
| 50067 K15 | M-014736- chromoson     | 83695 C12orf32 | 4330 | 15.635 | 3.205  |
| 50067 K16 | M-018583- tetraspanir   | 83882 TSPAN10  | 5141 | 32.231 | 13.391 |
| 50067 K17 | M-019414- NIK and IKk   | 83696 NIBP     | 4641 | 20.147 | 1.307  |
| 50067 K18 | M-014758- eukaryotic    | 83880 IFP38    | 5174 | 16.216 | 2.624  |
| 50067 K19 | M-007588- solute carri  | 83697 SLC4A9   | 5405 | 25.18  | 6.34   |
| 50067 K20 | M-018582- Usher synd    | 83878 USHBP1   | 6514 | 31.993 | 13.153 |
| 50067 K21 | M-014737- calneuron :   | 83698 CALN1    | 5331 | 21.534 | 2.694  |
| 50067 K23 | M-014738- SH3 domai     | 83699 SH3BGRL2 | 4681 | 18.586 | 0.254  |
| 50067 L02 | M-014855- transmemk     | 84283 TMEM79   | 3830 | 13.368 | 5.472  |
| 50067 L04 | M-007087- ring finger   | 84282 RNF135   | 5204 | 16.66  | 2.18   |
| 50067 L05 | M-015124- family with   | 84191 FAM96A   | 6325 | 19.636 | 0.796  |
| 50067 L06 | M-014854- hypothetic    | 84281 MGC13057 | 6189 | 12.183 | 6.657  |
| 50067 L07 | M-014808- SET domair    | 84193 SETD3    | 6252 | 16.843 | 1.997  |
| 50067 L08 | M-017963- BTB (POZ) c   | 84280 BTBD10   | 6436 | 21.924 | 3.084  |
| 50067 L09 | M-006079- ubiquitin sp  | 84196 USP48    | 6041 | 27.479 | 8.639  |
| 50067 L10 | M-014853- chromoson     | 84279 C2orf7   | 6244 | 22.982 | 4.142  |
| 50067 L11 | M-018662- thioredoxir   | 84203 TXNDC2   | 4423 | 12.706 | 6.134  |
| 50067 L12 | M-014852- hippocamp     | 84278 HIATL2   | 3689 | 15.641 | 3.199  |
| 50067 L13 | M-022292- ring finger : | 84206 RKHD3    | 3946 | 27.978 | 9.138  |
| 50067 L14 | M-017510- Williams Be   | 84277 WBSCR18  | 5194 | 34.405 | 15.565 |
| 50067 L15 | M-014816- ankyrin rep   | 84210 ANKRD20A | 5309 | 17.725 | 1.115  |
| 50067 L16 | M-018610- nicolin 1     | 84276 NICN1    | 6160 | 30.179 | 11.339 |

|           |                        |                 |      |        |        |
|-----------|------------------------|-----------------|------|--------|--------|
| 50067 L17 | M-014819- zinc finger  | 84215 ZNF541    | 5500 | 19.909 | 1.069  |
| 50067 L18 | M-007366- solute carri | 84275 SLC25A33  | 6978 | 31.155 | 12.315 |
| 50067 L19 | M-014820- transmembr   | 84216 TMEM117   | 6143 | 35.357 | 16.517 |
| 50067 L20 | M-014851- chromosom    | 84273 C4orf14   | 6340 | 26.388 | 7.548  |
| 50067 L21 | M-015735- zinc finger, | 84217 ZMYND12   | 5653 | 20.785 | 1.945  |
| 50067 L23 | M-014821- TBC1 doma    | 84218 TBC1D3    | 6364 | 25.456 | 6.616  |
| 50067 M02 | M-013037- TM2 doma     | 83877 TM2D2     | 4749 | 16.951 | 1.889  |
| 50067 M04 | M-016832- maestro      | 83876 MRO       | 5053 | 25.965 | 7.125  |
| 50067 M05 | M-017350- junctional c | 83700 JAM3      | 4643 | 26.147 | 7.307  |
| 50067 M06 | M-014757- beta-carote  | 83875 BCDO2     | 6488 | 22.842 | 4.002  |
| 50067 M07 | M-010677- UNC-112 re   | 83706 URP2      | 4454 | 20.656 | 1.816  |
| 50067 M08 | M-014756- TBC1 doma    | 83874 TBC1D10A  | 4299 | 18.586 | 0.254  |
| 50067 M09 | M-014739- tRNA phos    | 83707 TRPT1     | 5960 | 24.95  | 6.11   |
| 50067 M10 | M-013514- hemicentin   | 83872 HMCN1     | 5373 | 22.204 | 3.364  |
| 50067 M11 | M-014741- espin        | 83715 ESPN      | 3927 | 25.159 | 6.319  |
| 50067 M12 | M-009735- RAB34, me    | 83871 RAB34     | 3157 | 12.037 | 6.803  |
| 50067 M13 | M-014742- cysteine-ric | 83716 CRISPLD2  | 4104 | 27.68  | 8.84   |
| 50067 M14 | M-014755- testis-speci | 83863 TTTY5     | 4400 | 31.295 | 12.455 |
| 50067 M15 | M-017950- yippee-like  | 83719 YPEL3     | 4652 | 27.064 | 8.224  |
| 50067 M16 | M-014754- transmembr   | 83862 TMPIT     | 4769 | 23.779 | 4.939  |
| 50067 M17 | M-003996- family with  | 83723 FAM57B    | 4845 | 27.307 | 8.467  |
| 50067 M18 | M-018730- radial spok  | 83861 RSHL2     | 4631 | 18.506 | 0.334  |
| 50067 M19 | M-021435- inhibin, bet | 83729 INHBE     | 5143 | 17.15  | 1.69   |
| 50067 M20 | M-026403- TAF3 RNA p   | 83860 TAF3      | 4017 | 11.576 | 7.264  |
| 50067 M21 | M-007477- solute carri | 83733 SLC25A18  | 4170 | 13.094 | 5.746  |
| 50067 M23 | M-019426- ATG10 aut    | 83734 ATG10     | 4106 | 21.676 | 2.836  |
| 50067 N02 | M-014850- Yip1 domai   | 84272 YIPF4     | 5087 | 21.663 | 2.823  |
| 50067 N04 | M-019036- polymerase   | 84271 POLDIP3   | 5976 | 28.464 | 9.624  |
| 50067 N05 | M-014822- WD repeat    | 84219 WDR24     | 6995 | 31.48  | 12.64  |
| 50067 N06 | M-016972- chromosom    | 84270 C9orf89   | 7089 | 17.929 | 0.911  |
| 50067 N07 | M-015458- chromosom    | 84221 C21orf56  | 4541 | 15.019 | 3.821  |
| 50067 N08 | M-014849- coiled-coil  | 84269 CHCHD5    | 5479 | 9.0345 | 9.8055 |
| 50067 N09 | M-014823- hypothetic   | 84222 DKFZp434N | 6851 | 26.565 | 7.725  |
| 50067 N10 | M-014848- RPA interac  | 84268 RPAIN     | 6017 | 27.987 | 9.147  |
| 50067 N11 | M-014824- IQ motif co  | 84223 IQCG      | 5071 | 15.894 | 2.946  |
| 50067 N12 | M-018609- chromosom    | 84267 C9orf64   | 4007 | 25.48  | 6.64   |
| 50067 N13 | M-014826- zinc finger, | 84225 ZMYND15   | 3003 | 9.6237 | 9.2163 |
| 50067 N14 | M-014847- alkB, alkyla | 84266 ALKBH7    | 5115 | 18.123 | 0.717  |
| 50067 N15 | M-014827- chromosom    | 84226 C2orf16   | 4471 | 14.561 | 4.279  |
| 50067 N16 | M-014846- polymerase   | 84265 POLR3GL   | 6918 | 27.956 | 9.116  |
| 50067 N17 | M-014828- regulator o  | 84227 RGSL2     | 6139 | 16.306 | 2.534  |
| 50067 N18 | M-010184- hydroxyste   | 84263 HSDL2     | 5029 | 13.78  | 5.06   |
| 50067 N19 | M-018785- coiled-coil  | 84229 CCDC135   | 6639 | 19.069 | 0.229  |
| 50067 N20 | M-014845- chromosom    | 84262 C7orf48   | 6254 | 17.829 | 1.011  |
| 50067 N21 | M-007086- TNF recept   | 84231 TRAF7     | 5251 | 16.911 | 1.929  |
| 50067 N23 | M-018603- MAF1 hom     | 84232 MAF1      | 4185 | 17.18  | 1.66   |
| 50067 O02 | M-019443- ATPase fan   | 83858 ATAD3B    | 4216 | 9.63   | 9.21   |



|           |                        |                 |         |        |         |
|-----------|------------------------|-----------------|---------|--------|---------|
| 50067 O04 | M-016838- transmemk    | 83857 TMTC1     | 5095    | 18.979 | 0.139   |
| 50067 O05 | M-024979- H2A histon   | 83740 H2AFB3    | 5392    | 22.719 | 3.879   |
| 50067 O06 | M-014752- fibronectin  | 83856 FSD1L     | 5388    | 20.193 | 1.353   |
| 50067 O07 | M-014743- MARVEL dc    | 83742 MARVELD1  | 4974    | 11.661 | 7.179   |
| 50067 O08 | M-007809- angiopoieti  | 83854 ANGPTL6   | 5113    | 20.595 | 1.755   |
| 50067 O09 | M-027146- glutamate-   | 83743 GRWD1     | 6353    | 21.423 | 2.583   |
| 50067 O10 | M-014750- synaptotag   | 83851 SYT16     | 4373    | 27.304 | 8.464   |
| 50067 O11 | M-026258- zinc finger  | 83744 ZNF484    | 4120    | 16.092 | 2.748   |
| 50067 O12 | M-023602- family with  | 83850 FAM62C    | 4812    | 18.703 | 0.137   |
| 50067 O13 | M-007342- solute carri | 81893 SLC7A5P1  | 2387    | 15.165 | 3.675   |
| 50067 O14 | M-013513- synaptotag   | 83849 SYT15     | 4868    | 14.03  | 4.81    |
| 50067 O15 | M-013466- keratin ass  | 81850 KRTAP1-3  | 6107    | 17.521 | 1.319   |
| 50067 O16 | M-006259- potassium    | 83795 KCNK16    | 4253    | 17.635 | 1.205   |
| 50067 O17 | M-005933- lon peptida  | 83752 LONP2     | 4666    | 17.617 | 1.223   |
| 50067 O18 | M-018188- armadillo r  | 83787 ARMC10    | 5391    | 26.322 | 7.482   |
| 50067 O19 | M-022184- taste recep  | 83756 TAS1R3    | 4145    | 24.511 | 5.671   |
| 50067 O20 | M-018955- FKSG44 ger   | 83786 FKSG44    | 5354    | 15.521 | 3.319   |
| 50067 O21 | M-008304- retinol binc | 83758 RBP5      | 4302    | 24.361 | 5.521   |
| 50067 O23 | M-014744- RNA bindin   | 83759 RBM4B     | 3736    | 12.313 | 6.527   |
| 50067 P02 | M-014844- F-box and \  | 84261 FBXW9     | 3015    | 15.224 | 3.616   |
| 50067 P04 | M-014843- trichoplein, | 84260 TCHP      | 4885    | 17.687 | 1.153   |
| 50067 P05 | M-014829- transmemk    | 84233 TMEM126/  | 5859    | 18.416 | 0.424   |
| 50067 P06 | M-014842- DCN1, defe   | 84259 DCUN1D5   | 5678    | 15.358 | 3.482   |
| 50067 P07 | M-014830- hypothetic   | 84234 DKFZp547F | 5755    | 16.56  | 2.28    |
| 50067 P08 | M-014841- synaptotag   | 84258 SYT3      | 5018    | 11.618 | 7.222   |
| 50067 P09 | M-019378- rhomboid c   | 84236 RHBDD1    | 5915    | 23.297 | 4.457   |
| 50067 P10 | M-014839- FLYWCH-ty    | 84256 FLYWCH1   | 5267    | 8.3539 | 10.4861 |
| 50067 P11 | M-023682- ATPase typ   | 84239 ATP13A4   | 4150    | 2.9398 | 15.9002 |
| 50067 P12 | M-007556- solute carri | 84255 SLC37A3   | 4746    | 11.61  | 7.23    |
| 50067 P13 | M-014831- zinc finger, | 84240 ZCCHC9    | 4940    | 9.3522 | 9.4878  |
| 50067 P14 | M-018606- GTPase act   | 84253 GARNL3    | 6163    | 14.603 | 4.237   |
| 50067 P15 | M-021844- zinc finger, | 84243 ZDHHC18   | 1685    | 31.691 | 12.851  |
| 50067 P16 | M-014838- SH3-domai    | 84251 SGIP1     | 6038    | 12.62  | 6.22    |
| 50067 P17 | M-007755- hypothetic   | 84245 MGC3207   | 6068    | 20.353 | 1.513   |
| 50067 P18 | M-014837- ankyrin rep  | 84250 ANKRD32   | 4363    | 8.4116 | 10.4284 |
| 50067 P19 | M-014834- mediator o   | 84246 MED10     | 2931    | 8.7342 | 10.1058 |
| 50067 P20 | M-014836- pleckstrin a | 84249 PSD2      | 5277    | 11.01  | 7.83    |
| 50067 P21 | M-014835- leucine zip  | 84247 LDOC1L    | 5216    | 7.1319 | 11.7081 |
| 50067 P23 | M-018604- forty-two-t  | 84248 FYTDD1    | 4490    | 13.363 | 5.477   |
|           |                        | MAD             | 4713    | 18.841 | 4.709   |
|           |                        | 3MAD            |         |        | 14.127  |
|           |                        | MADc            |         |        | 6.96932 |
| 50067 C22 |                        |                 | 4863    | 60.395 |         |
| 50067 D22 |                        |                 | 4281    | 46.998 |         |
| 50067 E22 |                        |                 | 3672    | 51.471 |         |
| 50067 F22 |                        |                 | 5037    | 48.64  |         |
|           |                        | mn              | 4463.25 | 51.876 |         |

|           |                                   |        |           |          |          |
|-----------|-----------------------------------|--------|-----------|----------|----------|
|           |                                   |        | sd        | 618.6762 | 5.972268 |
| 50067 G22 |                                   |        |           | 1890     | 18.095   |
| 50067 H22 |                                   |        |           | 2915     | 11.046   |
| 50067 I22 |                                   |        |           | 1628     | 6.3882   |
| 50067 J22 | 3352                              | 21.122 |           |          |          |
|           |                                   |        | mn        | 2271.5   | 8.7171   |
|           |                                   |        | sd        | 910.0464 | 3.293562 |
|           |                                   |        | 3psSD     |          | 17.9168  |
|           |                                   |        | 3ngSD     |          | 9.880686 |
|           |                                   |        | SumSD     |          | 27.79749 |
|           |                                   |        | DiffMn    |          | 43.1589  |
|           |                                   |        | SmovrDiff |          | 0.644073 |
|           |                                   |        | 1minus    |          | 0.355927 |
| 50067 G03 | M-003290- polo-like ki            | 5347   | PLK1 SMAR | 986      | 11.968   |
| 50067 H03 | M-003290- polo-like ki            | 5347   | PLK1 SMAR | 960      | 3.6458   |
| 50067 I03 | D-001206- siControl non-targetinç |        |           | 5713     | 10.31    |
| 50067 J03 | D-001206- siControl non-targetinç |        |           | 5615     | 26.572   |
| 50067 K03 | D-001600- ( siGLO RISC-free siRNA |        |           | 5270     | 25.465   |
| 50067 L03 | D-001600- ( siGLO RISC-free siRNA |        |           | 6698     | 29.606   |

| rZ              | cell ct     | % inf         | AD            | rZ              | cell ct     | % inf         | AD            | rZ            |
|-----------------|-------------|---------------|---------------|-----------------|-------------|---------------|---------------|---------------|
| -1.07715        | 3395        | 7.7467        | 7.9333        | -1.21937        | 3013        | 9.5254        | 4.1746        | -0.77951      |
| -0.35757        | 3984        | 22.716        | 7.036         | 1.082757        | 2850        | 17.474        | 3.774         | 0.703285      |
| -1.16654        | 5488        | 16.29         | 0.61          | 0.094504        | 3082        | 13.303        | 0.397         | -0.07481      |
| -0.68055        | 3205        | 11.482        | 4.198         | -0.64492        | 2079        | 12.843        | 0.857         | -0.16062      |
| -0.85059        | 4308        | 11.56         | 4.12          | -0.63292        | 2472        | 8.5761        | 5.1239        | -0.9566       |
| -0.52329        | 4301        | 23.134        | 7.454         | 1.147042        | 1691        | 21.762        | 8.062         | 1.503201      |
| -0.92792        | 5178        | 14.639        | 1.041         | -0.1594         | 2796        | 12.411        | 1.289         | -0.24121      |
| -0.47178        | 5688        | 19.427        | 3.747         | 0.576943        | 2762        | 14.989        | 1.289         | 0.239714      |
| <b>1.222931</b> | <b>4894</b> | <b>29.751</b> | <b>14.071</b> | <b>2.164669</b> | <b>2349</b> | <b>34.994</b> | <b>21.294</b> | <b>3.9716</b> |
| 0.46016         | 3557        | 17.29         | 1.61          | 0.248294        | 2185        | 12.403        | 1.297         | -0.2427       |
| 0.068443        | 2568        | 8.7617        | 6.9183        | -1.06327        | 1777        | 8.6663        | 5.0337        | -0.93977      |
| -0.31682        | 4032        | 14.881        | 0.799         | -0.12219        | 3079        | 13.738        | 0.038         | 0.006343      |
| 0.504353        | 2881        | 20.201        | 4.521         | 0.695976        | 1903        | 16.553        | 2.853         | 0.531474      |
| 0.81084         | 4050        | 20.074        | 4.394         | 0.676445        | 2932        | 21.248        | 7.548         | 1.407316      |
| -0.65157        | 4552        | 15.29         | 0.39          | -0.05929        | 2733        | 13.758        | 0.058         | 0.010074      |
| -0.74498        | 3911        | 14.498        | 1.182         | -0.18109        | 2244        | 11.497        | 2.203         | -0.41171      |
| -0.73278        | 3692        | 13.272        | 2.408         | -0.36963        | 2451        | 14.035        | 0.335         | 0.061747      |
| 0.673667        | 3655        | 24.679        | 8.999         | 1.384647        | 2173        | 13.438        | 0.262         | -0.04962      |
| -0.04735        | 3654        | 15.298        | 0.382         | -0.05806        | 3195        | 13.74         | 0.04          | 0.006716      |
| 0.333175        | 3088        | 11.917        | 3.763         | -0.57802        | 4047        | 13.516        | 0.184         | -0.03507      |
| 0.866512        | 6051        | 17.468        | 1.788         | 0.275668        | 3905        | 24.558        | 10.858        | 2.024788      |
| -0.32299        | 4717        | 11.851        | 3.829         | -0.58817        | 3438        | 19.459        | 5.759         | 1.073582      |
| -1.00914        | 5684        | 10.662        | 5.018         | -0.77103        | 3454        | 9.8437        | 3.8563        | -0.72013      |
| -0.93567        | 6267        | 15.685        | 0.005         | 0.001461        | 3997        | 11.434        | 2.266         | -0.42346      |
| -0.7698         | 5635        | 17.125        | 1.445         | 0.222918        | 2570        | 16.148        | 2.448         | 0.455923      |
| -1.54341        | 4922        | 7.7408        | 7.9392        | -1.22028        | 1993        | 6.7235        | 6.9765        | -1.3022       |
| -1.38755        | 3341        | 7.5726        | 8.1074        | -1.24614        | 2559        | 7.7765        | 5.9235        | -1.10576      |
| -1.29282        | 3469        | 12.28         | 3.4           | -0.52219        | 1136        | 10.739        | 2.961         | -0.55311      |
| -0.60465        | 4912        | 13.721        | 1.959         | -0.30058        | 2322        | 9.1301        | 4.5699        | -0.85325      |
| -0.30462        | 4442        | 12.765        | 2.915         | -0.44761        | 1711        | 8.007         | 5.693         | -1.06276      |
| -0.59331        | 3813        | 16.103        | 0.423         | 0.065745        | 2270        | 12.775        | 0.925         | -0.1733       |
| -0.9658         | 6031        | 22.666        | 6.986         | 1.075068        | 1320        | 10.379        | 3.321         | -0.62027      |
| 0.518702        | 5769        | 22.257        | 6.577         | 1.012168        | 2153        | 8.0353        | 5.6647        | -1.05748      |
| 0.677398        | 4069        | 22.02         | 6.34          | 0.97572         | 1440        | 11.389        | 2.311         | -0.43186      |
| -0.04549        | 4615        | 21.408        | 5.728         | 0.8816          | 1771        | 9.825         | 3.875         | -0.72362      |
| -0.81414        | 4781        | 15.75         | 0.07          | 0.011457        | 1883        | 12.427        | 1.273         | -0.23822      |
| -1.04257        | 4826        | 15.126        | 0.554         | -0.08451        | 3165        | 7.0458        | 6.6542        | -1.24207      |
| 0.922759        | 4447        | 33.191        | 17.511        | 2.693706        | 2862        | 17.121        | 3.421         | 0.637433      |
| -1.29644        | 4390        | 15.353        | 0.327         | -0.0496         | 2704        | 4.3639        | 9.3361        | -1.74237      |
| 1.588821        | 4909        | 36.993        | 21.313        | 3.278415        | 3860        | 17.772        | 4.072         | 0.758876      |
| -0.50737        | 3930        | 10.891        | 4.789         | -0.73581        | 4731        | 10.188        | 3.512         | -0.6559       |
| -0.0815         | 4150        | 12.386        | 3.294         | -0.50589        | 4534        | 14.402        | 0.702         | 0.13021       |
| -0.12368        | 4615        | 15.666        | 0.014         | -0.00146        | 3985        | 10.489        | 3.211         | -0.59975      |
| -0.03616        | 4143        | 20.71         | 5.03          | 0.774255        | 3187        | 14.026        | 0.326         | 0.060068      |
| -0.09843        | 5474        | 17.136        | 1.456         | 0.22461         | 3223        | 21.222        | 7.522         | 1.402465      |
| 0.536064        | 4374        | 18.839        | 3.159         | 0.486514        | 2494        | 17.562        | 3.862         | 0.719701      |

|          |      |        |        |          |      |        |         |          |
|----------|------|--------|--------|----------|------|--------|---------|----------|
| -0.86967 | 4238 | 10.217 | 5.463  | -0.83946 | 1901 | 3.9453 | 9.7547  | -1.82046 |
| 0.520567 | 4485 | 17.235 | 1.555  | 0.239835 | 2647 | 11.145 | 2.555   | -0.47738 |
| 1.783244 | 3931 | 24.345 | 8.665  | 1.333281 | 1756 | 15.148 | 1.448   | 0.269375 |
| 0.361154 | 3255 | 19.601 | 3.921  | 0.603702 | 2013 | 13.91  | 0.21    | 0.038429 |
| 2.072656 | 2576 | 23.059 | 7.379  | 1.135507 | 1253 | 16.76  | 3.06    | 0.57009  |
| -0.79089 | 4277 | 17.302 | 1.622  | 0.250139 | 1961 | 10.964 | 2.736   | -0.51114 |
| 0.313373 | 3666 | 13.557 | 2.123  | -0.3258  | 1281 | 11.163 | 2.537   | -0.47402 |
| 0.976566 | 4997 | 24.855 | 9.175  | 1.411714 | 2600 | 17.154 | 3.454   | 0.643589 |
| -0.95461 | 4184 | 9.608  | 6.072  | -0.93312 | 2077 | 12.229 | 1.471   | -0.27516 |
| -0.60063 | 4898 | 9.8612 | 5.8188 | -0.89418 | 1362 | 3.8179 | 9.8821  | -1.84423 |
| -1.5321  | 4292 | 12.232 | 3.448  | -0.52958 | 1536 | 4.362  | 9.338   | -1.74273 |
| 0.246365 | 4620 | 16.472 | 0.792  | 0.122494 | 2898 | 5.4175 | 8.2825  | -1.54583 |
| -0.17276 | 4294 | 12.017 | 3.663  | -0.56264 | 2743 | 4.3019 | 9.3981  | -1.75394 |
| 0.645687 | 3386 | 19.492 | 3.812  | 0.586939 | 3072 | 7.1615 | 6.5385  | -1.22049 |
| -0.02167 | 5366 | 25.177 | 9.497  | 1.461234 | 5234 | 12.801 | 0.899   | -0.16845 |
| -1.2093  | 2756 | 14.224 | 1.456  | -0.22323 | 2414 | 5.5924 | 8.1076  | -1.5132  |
| -1.14114 | 4060 | 18.941 | 3.261  | 0.502201 | 3772 | 9.7561 | 3.9439  | -0.73647 |
| -0.24637 | 4897 | 15.152 | 0.528  | -0.08051 | 3764 | 2.8959 | 10.8041 | -2.01623 |
| 1.616227 | 5021 | 37.064 | 21.384 | 3.289334 | 3667 | 16.171 | 2.471   | 0.460213 |
| 0.029271 | 4432 | 23.127 | 7.447  | 1.145965 | 1766 | 5.7758 | 7.9242  | -1.47899 |
| 1.114169 | 5388 | 26.151 | 10.471 | 1.611026 | 3491 | 15.726 | 2.026   | 0.377199 |
| 0.027549 | 5404 | 19.689 | 4.009  | 0.617236 | 3195 | 13.865 | 0.165   | 0.030034 |
| 0.397456 | 5497 | 25.523 | 9.843  | 1.514445 | 2809 | 16.625 | 2.925   | 0.544906 |
| -0.54525 | 4102 | 18.625 | 2.945  | 0.453603 | 2662 | 11.796 | 1.904   | -0.35593 |
| -1.74416 | 2414 | 12.262 | 3.418  | -0.52496 | 2004 | 4.8902 | 8.8098  | -1.64419 |
| -0.17261 | 3363 | 13.351 | 2.329  | -0.35748 | 2011 | 8.7021 | 4.9979  | -0.93309 |
| -0.59618 | 3820 | 14.346 | 1.334  | -0.20446 | 1234 | 10.13  | 3.57    | -0.66672 |
| 0.112923 | 4677 | 20.291 | 4.611  | 0.709817 | 3503 | 18.87  | 5.17    | 0.963705 |
| -1.62537 | 4141 | 12.944 | 2.736  | -0.42008 | 2077 | 9.5811 | 4.1189  | -0.76912 |
| 0.434045 | 5431 | 24.121 | 8.441  | 1.298832 | 2796 | 15.093 | 1.393   | 0.259115 |
| -1.14602 | 4340 | 11.359 | 4.321  | -0.66383 | 2204 | 8.2123 | 5.4877  | -1.02446 |
| -1.42249 | 4821 | 18.191 | 2.511  | 0.386858 | 2769 | 8.3424 | 5.3576  | -1.00019 |
| 0.573083 | 4208 | 22.624 | 6.944  | 1.068609 | 1869 | 15.142 | 1.442   | 0.268256 |
| -0.22068 | 4218 | 20.65  | 4.97   | 0.765028 | 2938 | 14.261 | 0.561   | 0.103907 |
| -0.92032 | 5357 | 10.006 | 5.674  | -0.87191 | 5860 | 10.444 | 3.256   | -0.60815 |
| -0.62431 | 3797 | 14.011 | 1.669  | -0.25598 | 3867 | 12.775 | 0.925   | -0.1733  |
| 1.080306 | 6823 | 25.722 | 10.042 | 1.54505  | 3912 | 16.283 | 2.583   | 0.481106 |
| 0.335327 | 5031 | 19.519 | 3.839  | 0.591091 | 3912 | 14.801 | 1.101   | 0.204643 |
| 0.203463 | 4713 | 16.359 | 0.679  | 0.105115 | 2810 | 8.4342 | 5.2658  | -0.98307 |
| 2.608432 | 5815 | 30.576 | 14.896 | 2.291546 | 3062 | 19.366 | 5.666   | 1.056233 |
| 0.766072 | 4626 | 21.509 | 5.829  | 0.897133 | 3454 | 12.884 | 0.816   | -0.15297 |
| 0.589584 | 6082 | 24.975 | 9.295  | 1.430169 | 3628 | 19.763 | 6.063   | 1.130292 |
| 1.558402 | 5953 | 28.406 | 12.726 | 1.957822 | 3321 | 21.168 | 7.468   | 1.392392 |
| 1.263825 | 1702 | 12.808 | 2.872  | -0.44099 | 1621 | 18.692 | 4.992   | 0.9305   |
| 0.351828 | 5082 | 22.609 | 6.929  | 1.066302 | 3401 | 14.849 | 1.149   | 0.213597 |
| 0.455999 | 4787 | 13.662 | 2.018  | -0.30966 | 2642 | 13.285 | 0.415   | -0.07816 |
| -0.02281 | 3212 | 7.1295 | 8.5505 | -1.31429 | 2314 | 11.279 | 2.421   | -0.45238 |

|                 |             |               |               |                 |             |               |               |                 |
|-----------------|-------------|---------------|---------------|-----------------|-------------|---------------|---------------|-----------------|
| 2.652339        | 6228        | 24.663        | 8.983         | 1.382186        | 1922        | 17.43         | 3.73          | 0.695077        |
| 1.247754        | 6749        | 28.019        | 12.339        | 1.898305        | 3670        | 18.747        | 5.047         | 0.94076         |
| -0.17376        | 4117        | 5.708         | 9.972         | -1.5329         | 1393        | 4.0201        | 9.6799        | -1.80651        |
| 1.495555        | 5870        | 24.855        | 9.175         | 1.411714        | 3251        | 14.611        | 0.911         | 0.169199        |
| 0.655588        | 6016        | 13.979        | 1.701         | -0.2609         | 2913        | 8.033         | 5.667         | -1.05791        |
| 0.253109        | 4439        | 11.602        | 4.078         | -0.62646        | 2621        | 10.416        | 3.284         | -0.61337        |
| -0.35226        | 4628        | 9.2913        | 6.3887        | -0.98183        | 2963        | 12.082        | 1.618         | -0.30258        |
| -0.81199        | 5252        | 16.813        | 1.133         | 0.174936        | 4457        | 14.404        | 0.704         | 0.130583        |
| <b>1.933618</b> | <b>6226</b> | <b>31.577</b> | <b>15.897</b> | <b>2.445489</b> | <b>4987</b> | <b>28.153</b> | <b>14.453</b> | <b>2.695427</b> |
| -0.68515        | 5162        | 11.798        | 3.882         | -0.59632        | 4848        | 12.108        | 1.592         | -0.29773        |
| 1.185051        | 4434        | 22.17         | 6.49          | 0.998788        | 3359        | 18.547        | 4.847         | 0.90345         |
| 0.260284        | 3983        | 22.295        | 6.615         | 1.018012        | 2697        | 19.244        | 5.544         | 1.033474        |
| 1.014016        | 3376        | 23.193        | 7.513         | 1.156115        | 2260        | 21.416        | 7.716         | 1.438656        |
| -1.73599        | 3313        | 6.2179        | 9.4621        | -1.45448        | 1788        | 7.774         | 5.926         | -1.10623        |
| 0.270328        | 5042        | 26.735        | 11.055        | 1.700839        | 4225        | 22.343        | 8.643         | 1.611585        |
| 1.013155        | 4340        | 20.507        | 4.827         | 0.743036        | 3524        | 15.494        | 1.794         | 0.33392         |
| -0.87225        | 2402        | 12.032        | 3.648         | -0.56033        | 1839        | 8.211         | 5.489         | -1.02471        |
| -0.87196        | 2723        | 10.723        | 4.957         | -0.76164        | 1820        | 4.2857        | 9.4143        | -1.75696        |
| -0.39358        | 3995        | 16.195        | 0.515         | 0.079894        | 3232        | 7.271         | 6.429         | -1.20006        |
| -0.66233        | 2514        | 11.018        | 4.662         | -0.71628        | 2515        | 9.7018        | 3.9982        | -0.7466         |
| 1.165967        | 4809        | 23.872        | 8.192         | 1.260538        | 2639        | 16.484        | 2.784         | 0.518603        |
| -0.59375        | 3633        | 11.974        | 3.706         | -0.56925        | 2536        | 10.607        | 3.093         | -0.57774        |
| -0.5639         | 5044        | 12.688        | 2.992         | -0.45945        | 3544        | 6.0666        | 7.6334        | -1.42474        |
| 1.934335        | 5772        | 27.841        | 12.161        | 1.87093         | 5314        | 24.84         | 11.14         | 2.077395        |
| 0.183375        | 5458        | 14.841        | 0.839         | -0.12834        | 4985        | 11.314        | 2.386         | -0.44585        |
| -0.68515        | 5428        | 12.012        | 3.668         | -0.56341        | 4228        | 11.755        | 1.945         | -0.36358        |
| 0.217668        | 4292        | 17.847        | 2.167         | 0.333955        | 4253        | 6.1368        | 7.5632        | -1.41164        |
| -1.87233        | 6054        | 13.528        | 2.152         | -0.33026        | 5726        | 12.889        | 0.811         | -0.15204        |
| 1.137127        | 2723        | 26.956        | 11.276        | 1.734826        | 2435        | 22.834        | 9.134         | 1.70318         |
| 1.762295        | 4290        | 29.254        | 13.574        | 2.088235        | 3499        | 21.749        | 8.049         | 1.500776        |
| -0.10891        | 2441        | 10.651        | 5.029         | -0.77272        | 4156        | 10.01         | 3.69          | -0.68911        |
| -0.69462        | 4348        | 13.615        | 2.065         | -0.31688        | 3061        | 14.211        | 0.511         | 0.09458         |
| -0.79075        | 3788        | 9.7413        | 5.9387        | -0.91262        | 3415        | 10.425        | 3.275         | -0.61169        |
| -0.46289        | 5015        | 10.13         | 5.55          | -0.85284        | 4569        | 6.3471        | 7.3529        | -1.37241        |
| <b>2.517749</b> | <b>4793</b> | <b>33.194</b> | <b>17.514</b> | <b>2.694167</b> | <b>3733</b> | <b>20.975</b> | <b>7.275</b>  | <b>1.356388</b> |
| 0.194137        | 3534        | 21.307        | 5.627         | 0.866068        | 2650        | 11.962        | 1.738         | -0.32497        |
| 0.115076        | 3038        | 18.499        | 2.819         | 0.434226        | 2679        | 11.497        | 2.203         | -0.41171        |
| -0.8955         | 3712        | 12.581        | 3.099         | -0.4759         | 2670        | 7.8652        | 5.8348        | -1.08921        |
| 0.978144        | 1618        | 20.89         | 5.21          | 0.801937        | 1178        | 10.102        | 3.598         | -0.67194        |
| 0.284102        | 3976        | 17.631        | 1.951         | 0.300736        | 2941        | 12.173        | 1.527         | -0.2856         |
| -0.35685        | 5083        | 12.493        | 3.187         | -0.48944        | 3540        | 5.9605        | 7.7395        | -1.44453        |
| 1.279465        | 6100        | 20.77         | 5.09          | 0.783482        | 2719        | 9.8566        | 3.8434        | -0.71772        |
| <b>4.058502</b> | <b>5398</b> | <b>37.921</b> | <b>22.241</b> | <b>3.421132</b> | <b>3696</b> | <b>20.373</b> | <b>6.673</b>  | <b>1.244086</b> |
| -0.02224        | 3349        | 11.287        | 4.393         | -0.67491        | 2723        | 3.8193        | 9.8807        | -1.84397        |
| 1.067679        | 3922        | 22.642        | 6.962         | 1.071377        | 2983        | 10.929        | 2.771         | -0.51767        |
| -0.1597         | 4410        | 20.68         | 5             | 0.769641        | 3526        | 8.962         | 4.738         | -0.88461        |
| -0.47193        | 5705        | 12.761        | 2.919         | -0.44822        | 3600        | 6.1667        | 7.5333        | -1.40607        |

|          |      |        |        |          |      |        |        |          |
|----------|------|--------|--------|----------|------|--------|--------|----------|
| 0.236465 | 5531 | 14.446 | 1.234  | -0.18908 | 4975 | 15.276 | 1.576  | 0.293253 |
| 0.853168 | 5946 | 29.331 | 13.651 | 2.100077 | 5598 | 24.116 | 10.416 | 1.942334 |
| 3.942422 | 4052 | 39.931 | 24.251 | 3.73025  | 3757 | 47.99  | 34.29  | 6.395974 |
| -0.67008 | 4748 | 13.079 | 2.601  | -0.39932 | 3322 | 14.389 | 0.689  | 0.127785 |
| 1.806202 | 5166 | 29.907 | 14.227 | 2.18866  | 4278 | 32.445 | 18.745 | 3.49609  |
| -1.54526 | 4926 | 13.54  | 2.14   | -0.32842 | 3082 | 11.486 | 2.214  | -0.41376 |
| 0.23833  | 4876 | 22.416 | 6.736  | 1.03662  | 3643 | 19.407 | 5.707  | 1.063881 |
| -0.0904  | 4394 | 13.564 | 2.116  | -0.32473 | 3628 | 11.825 | 1.875  | -0.35052 |
| 0.126555 | 4521 | 19.443 | 3.763  | 0.579403 | 2910 | 16.254 | 2.554  | 0.475697 |
| 0.564904 | 4020 | 19.055 | 3.375  | 0.519733 | 2412 | 12.604 | 1.096  | -0.2052  |
| 0.045485 | 2991 | 13.173 | 2.507  | -0.38486 | 3194 | 14.621 | 0.921  | 0.171064 |
| 0.094844 | 3828 | 20.324 | 4.644  | 0.714892 | 2300 | 15.087 | 1.387  | 0.257995 |
| -0.92692 | 2658 | 8.8789 | 6.8011 | -1.04525 | 2446 | 5.1513 | 8.5487 | -1.59549 |
| 2.435675 | 4242 | 30.174 | 14.494 | 2.229722 | 2861 | 23.558 | 9.858  | 1.838241 |
| -0.32672 | 2929 | 12.632 | 3.048  | -0.46806 | 1843 | 8.3559 | 5.3441 | -0.99768 |
| 0.653722 | 4254 | 26.046 | 10.366 | 1.594878 | 1881 | 11.43  | 2.27   | -0.42421 |
| 0.934955 | 5106 | 23.619 | 7.939  | 1.22163  | 3884 | 16.813 | 3.113  | 0.579977 |
| -0.41252 | 4490 | 10.869 | 4.811  | -0.73919 | 3302 | 4.3307 | 9.3693 | -1.74857 |
| 1.131531 | 5028 | 26.85  | 11.17  | 1.718525 | 4655 | 21.375 | 7.675  | 1.431007 |
| 0.259566 | 3807 | 18.492 | 2.812  | 0.433149 | 4455 | 8.5073 | 5.1927 | -0.96943 |
| -0.0739  | 3745 | 28.144 | 12.464 | 1.917529 | 4670 | 27.709 | 14.009 | 2.6126   |
| -0.79333 | 4617 | 20.468 | 4.788  | 0.737038 | 4022 | 12.904 | 0.796  | -0.14924 |
| -0.07375 | 2958 | 22.887 | 7.207  | 1.109055 | 3233 | 20.384 | 6.684  | 1.246138 |
| -1.3532  | 4247 | 18.696 | 3.016  | 0.464522 | 4430 | 12.348 | 1.352  | -0.25296 |
| -1.12809 | 3960 | 16.768 | 1.088  | 0.168015 | 3787 | 11.83  | 1.87   | -0.34959 |
| -1.84074 | 2948 | 11.737 | 3.943  | -0.6057  | 3910 | 7.3913 | 6.3087 | -1.17762 |
| -0.22154 | 3583 | 18.811 | 3.131  | 0.482208 | 4413 | 12.441 | 1.259  | -0.23561 |
| -1.70222 | 2900 | 10.379 | 5.301  | -0.81455 | 4022 | 8.2297 | 5.4703 | -1.02122 |
| -0.53664 | 3414 | 16.755 | 1.075  | 0.166016 | 4280 | 9.5561 | 4.1439 | -0.77378 |
| -1.04157 | 3470 | 15.764 | 0.084  | 0.01361  | 3312 | 14.13  | 0.43   | 0.079469 |
| 0.470204 | 2981 | 22.409 | 6.729  | 1.035544 | 3446 | 19.791 | 6.091  | 1.135516 |
| -0.95088 | 3274 | 11.393 | 4.287  | -0.65861 | 3473 | 8.3501 | 5.3499 | -0.99876 |
| 0.216233 | 2829 | 16.26  | 0.58   | 0.08989  | 4309 | 16.988 | 3.288  | 0.612623 |
| -0.45083 | 3173 | 15.254 | 0.426  | -0.06482 | 3056 | 11.78  | 1.92   | -0.35892 |
| 0.689163 | 3541 | 17.622 | 1.942  | 0.299352 | 3745 | 18.932 | 5.232  | 0.975271 |
| -1.15521 | 2507 | 11.488 | 4.192  | -0.64399 | 2842 | 12.597 | 1.103  | -0.20651 |
| 0.800795 | 5382 | 20.996 | 5.316  | 0.818239 | 2952 | 23.34  | 9.64   | 1.797573 |
| -0.64856 | 4927 | 17.191 | 1.511  | 0.233069 | 4600 | 12.913 | 0.787  | -0.14756 |
| -0.03903 | 4959 | 14.459 | 1.221  | -0.18709 | 4699 | 11.641 | 2.059  | -0.38485 |
| -0.07016 | 3441 | 10.433 | 5.247  | -0.80624 | 3927 | 13.038 | 0.662  | -0.12424 |
| 2.213128 | 4522 | 21.207 | 5.527  | 0.850689 | 3958 | 21.728 | 8.028  | 1.496859 |
| 0.020088 | 3784 | 17.151 | 1.471  | 0.226917 | 3305 | 17.64  | 3.94   | 0.734252 |
| 1.031664 | 4837 | 10.75  | 4.93   | -0.75749 | 5406 | 16.963 | 3.263  | 0.607959 |
| 1.565432 | 4462 | 20.574 | 4.894  | 0.75334  | 5408 | 21.616 | 7.916  | 1.475965 |
| 0.057394 | 3513 | 11.358 | 4.322  | -0.66399 | 4639 | 14.809 | 1.109  | 0.206135 |
| 0.558735 | 3635 | 11.197 | 4.483  | -0.68875 | 4232 | 10.232 | 3.468  | -0.64769 |
| 1.121774 | 4120 | 17.767 | 2.087  | 0.321651 | 5455 | 18.772 | 5.072  | 0.945424 |

|          |      |        |        |          |      |        |        |          |
|----------|------|--------|--------|----------|------|--------|--------|----------|
| 1.860583 | 2353 | 17.637 | 1.957  | 0.301659 | 4352 | 23.46  | 9.76   | 1.819959 |
| 2.074234 | 4196 | 16.969 | 1.289  | 0.198927 | 4371 | 20.339 | 6.639  | 1.237744 |
| 1.405302 | 2858 | 12.141 | 3.539  | -0.54357 | 3623 | 13.442 | 0.258  | -0.04888 |
| 0.229147 | 3211 | 9.4986 | 6.1814 | -0.94994 | 4119 | 11.92  | 1.78   | -0.3328  |
| 1.485367 | 2888 | 15.166 | 0.514  | -0.07836 | 3969 | 20.005 | 6.305  | 1.175437 |
| 1.650663 | 4272 | 23.596 | 7.916  | 1.218092 | 4034 | 19.683 | 5.983  | 1.115369 |
| 0.21896  | 4077 | 10.081 | 5.599  | -0.86038 | 5026 | 16.037 | 2.337  | 0.435216 |
| 1.419651 | 2495 | 17.475 | 1.795  | 0.276745 | 3312 | 13.979 | 0.279  | 0.051301 |
| 2.337961 | 4455 | 18.945 | 3.265  | 0.502816 | 4796 | 23.332 | 9.632  | 1.796081 |
| 1.604317 | 4300 | 12.488 | 3.192  | -0.49021 | 4888 | 15.732 | 2.032  | 0.378319 |
| 0.481539 | 3939 | 15.232 | 0.448  | -0.06821 | 4985 | 16.349 | 2.649  | 0.493419 |
| -0.44825 | 4536 | 9.3915 | 6.2885 | -0.96642 | 5951 | 13.594 | 0.106  | -0.02052 |
| 1.155636 | 4026 | 10.432 | 5.248  | -0.8064  | 5652 | 17.268 | 3.568  | 0.664856 |
| 1.218053 | 4237 | 19.802 | 4.122  | 0.634614 | 4879 | 23.058 | 9.358  | 1.744967 |
| -0.8988  | 3738 | 11.932 | 3.748  | -0.57571 | 4294 | 13.67  | 0.03   | -0.00634 |
| 2.029753 | 4684 | 22.011 | 6.331  | 0.974336 | 5975 | 21.975 | 8.275  | 1.542936 |
| 0.324852 | 3725 | 11.946 | 3.734  | -0.57356 | 5384 | 15.119 | 1.419  | 0.263965 |
| 0.340636 | 4159 | 17.721 | 2.041  | 0.314577 | 6551 | 15.585 | 1.885  | 0.350896 |
| -0.23044 | 2591 | 7.4875 | 8.1925 | -1.25923 | 3472 | 11.175 | 2.525  | -0.47178 |
| 0.324422 | 4126 | 13.888 | 1.792  | -0.2749  | 4628 | 22.926 | 9.226  | 1.720343 |
| 0.495888 | 4153 | 15.555 | 0.125  | -0.01853 | 4587 | 13.298 | 0.402  | -0.07574 |
| 0.547112 | 3875 | 21.006 | 5.326  | 0.819777 | 5238 | 22.184 | 8.484  | 1.581924 |
| -0.77755 | 3360 | 6.0417 | 9.6383 | -1.48158 | 3795 | 6.0343 | 7.6657 | -1.43076 |
| 0.628756 | 3903 | 17.935 | 2.255  | 0.347488 | 3818 | 25.065 | 11.365 | 2.119368 |
| -0.25684 | 1168 | 6.3356 | 9.3444 | -1.43638 | 2972 | 4.677  | 9.023  | -1.68397 |
| -0.46002 | 3915 | 16.986 | 1.306  | 0.201542 | 5135 | 20.779 | 7.079  | 1.319825 |
| 1.921278 | 4083 | 28.68  | 13     | 1.99996  | 3269 | 26.981 | 13.281 | 2.476793 |
| 0.187393 | 2958 | 12.711 | 2.969  | -0.45591 | 3093 | 9.57   | 4.13   | -0.77119 |
| -0.37665 | 3869 | 10.804 | 4.876  | -0.74919 | 5173 | 6.1473 | 7.5527 | -1.40968 |
| 0.909558 | 5545 | 25.951 | 10.271 | 1.580268 | 5999 | 16.236 | 2.536  | 0.472339 |
| 1.887128 | 7236 | 27.004 | 11.324 | 1.742208 | 6783 | 20.271 | 6.571  | 1.225059 |
| 0.386408 | 5720 | 12.15  | 3.53   | -0.54219 | 6348 | 8.7272 | 4.9728 | -0.92841 |
| -0.03659 | 4318 | 10.259 | 5.421  | -0.833   | 4985 | 5.998  | 7.702  | -1.43754 |
| -0.7853  | 3957 | 11.17  | 4.51   | -0.6929  | 4223 | 9.6614 | 4.0386 | -0.75414 |
| -0.31294 | 4099 | 10.49  | 5.19   | -0.79748 | 4534 | 11.976 | 1.724  | -0.32235 |
| 0.114071 | 3712 | 9.2942 | 6.3858 | -0.98138 | 4247 | 19.331 | 5.631  | 1.049704 |
| -0.95533 | 3489 | 7.6813 | 7.9987 | -1.22943 | 5248 | 6.955  | 6.745  | -1.25901 |
| -0.28669 | 3223 | 12.876 | 2.804  | -0.43053 | 5021 | 11.153 | 2.547  | -0.47588 |
| 0.442367 | 3192 | 9.1479 | 6.5321 | -1.00388 | 3742 | 8.9524 | 4.7476 | -0.8864  |
| 1.239432 | 3300 | 18.818 | 3.138  | 0.483285 | 6465 | 27.873 | 14.173 | 2.643194 |
| 0.594176 | 3713 | 12.389 | 3.291  | -0.50543 | 5633 | 13.51  | 0.19   | -0.03619 |
| -0.88029 | 2467 | 9.6473 | 6.0327 | -0.92708 | 3870 | 14.444 | 0.744  | 0.138045 |
| -0.45916 | 2317 | 8.4161 | 7.2639 | -1.11642 | 2920 | 9.1096 | 4.5904 | -0.85707 |
| 1.311032 | 3337 | 13.126 | 2.554  | -0.39209 | 3779 | 17.306 | 3.606  | 0.671945 |
| 2.233216 | 3327 | 21.821 | 6.141  | 0.945115 | 4492 | 20.058 | 6.358  | 1.185324 |
| -0.16013 | 2007 | 15.047 | 0.633  | -0.09666 | 4368 | 17.193 | 3.493  | 0.650865 |
| 1.626845 | 4534 | 28.606 | 12.926 | 1.98858  | 4955 | 14.733 | 1.033  | 0.191958 |

|          |      |        |         |          |      |        |        |          |
|----------|------|--------|---------|----------|------|--------|--------|----------|
| 0.153243 | 2683 | 15.654 | 0.026   | -0.00331 | 2963 | 9.2811 | 4.4189 | -0.82508 |
| 1.766887 | 3869 | 19.437 | 3.757   | 0.57848  | 6939 | 22.035 | 8.335  | 1.554129 |
| 2.369815 | 4632 | 28.282 | 12.602  | 1.938752 | 5809 | 21.725 | 8.025  | 1.496299 |
| 1.082889 | 3483 | 21.131 | 5.451   | 0.839    | 4998 | 14.086 | 0.386  | 0.071261 |
| 0.278937 | 2538 | 10.599 | 5.081   | -0.78071 | 5404 | 10.77  | 2.93   | -0.54733 |
| 0.94916  | 4761 | 22.117 | 6.437   | 0.990637 | 5492 | 9.614  | 4.086  | -0.76298 |
| -0.27119 | 4242 | 8.5101 | 7.1699  | -1.10197 | 4044 | 10.93  | 2.77   | -0.51748 |
| 1.022194 | 4181 | 17.46  | 1.78    | 0.274438 | 4680 | 16.004 | 2.304  | 0.42906  |
| 1.048309 | 3920 | 20.944 | 5.264   | 0.810242 | 5500 | 28.018 | 14.318 | 2.670243 |
| 0.574088 | 4790 | 14.614 | 1.066   | -0.16325 | 5769 | 19.015 | 5.315  | 0.990755 |
| 0.260427 | 4438 | 20.46  | 4.78    | 0.735808 | 5900 | 21.847 | 8.147  | 1.519058 |
| -0.03659 | 3839 | 12.868 | 2.812   | -0.43176 | 5732 | 20.586 | 6.886  | 1.283821 |
| 0.876556 | 3232 | 17.358 | 1.678   | 0.258751 | 5782 | 30.249 | 16.549 | 3.086431 |
| 0.482543 | 3064 | 14.752 | 0.928   | -0.14202 | 5132 | 19.934 | 6.234  | 1.162192 |
| 0.906545 | 3861 | 16.887 | 1.207   | 0.186316 | 5247 | 24.814 | 11.114 | 2.072545 |
| -0.97628 | 2575 | 11.767 | 3.913   | -0.60109 | 3477 | 11.418 | 2.282  | -0.42645 |
| 1.268273 | 3491 | 21.054 | 5.374   | 0.827159 | 3851 | 27.032 | 13.332 | 2.486307 |
| 1.786975 | 3276 | 20.452 | 4.772   | 0.734577 | 3976 | 27.716 | 14.016 | 2.613906 |
| 1.179886 | 3565 | 30.21  | 14.53   | 2.235258 | 5321 | 29.337 | 15.637 | 2.9163   |
| 0.708534 | 4478 | 18.736 | 3.056   | 0.470674 | 4249 | 17.369 | 3.669  | 0.683697 |
| 1.214753 | 4323 | 18.876 | 3.196   | 0.492204 | 4976 | 20.86  | 7.16   | 1.334935 |
| -0.04807 | 3534 | 19.44  | 3.76    | 0.578942 | 4280 | 11.893 | 1.807  | -0.33784 |
| -0.24263 | 3361 | 10.8   | 4.88    | -0.7498  | 4114 | 12.883 | 0.817  | -0.15316 |
| -1.04243 | 3549 | 11.496 | 4.184   | -0.64276 | 3840 | 11.276 | 2.424  | -0.45294 |
| -0.82461 | 2959 | 10.443 | 5.237   | -0.80471 | 4372 | 17.338 | 3.638  | 0.677914 |
| 0.406783 | 4710 | 21.423 | 5.743   | 0.883907 | 4020 | 21.219 | 7.519  | 1.401906 |
| 0.404918 | 5060 | 17.767 | 2.087   | 0.321651 | 4661 | 22.806 | 9.106  | 1.697957 |
| 1.380766 | 3963 | 13.02  | 2.66    | -0.40839 | 4030 | 15.881 | 2.181  | 0.406114 |
| 1.81352  | 5268 | 14.749 | 0.931   | -0.14249 | 5902 | 20.112 | 6.412  | 1.195397 |
| -0.13086 | 4337 | 7.9548 | 7.7252  | -1.18737 | 7051 | 18.04  | 4.34   | 0.808871 |
| -0.5484  | 2763 | 7.1299 | 8.5501  | -1.31423 | 4017 | 8.7628 | 4.9372 | -0.92177 |
| -1.4071  | 2949 | 6.1716 | 9.5084  | -1.4616  | 3857 | 10.526 | 3.174  | -0.59285 |
| 1.108286 | 3616 | 15.487 | 0.193   | -0.02899 | 4367 | 12.663 | 1.037  | -0.1942  |
| 1.312323 | 3242 | 16.687 | 1.007   | 0.155558 | 4792 | 30.822 | 17.122 | 3.193323 |
| -0.42285 | 3610 | 7.6731 | 8.0069  | -1.23069 | 5012 | 14.385 | 0.685  | 0.127039 |
| 0.952604 | 3150 | 16.381 | 0.701   | 0.108499 | 3224 | 22.084 | 8.384  | 1.56327  |
| -1.32255 | 2025 | 3.358  | 12.322  | -1.89431 | 2465 | 6.2069 | 7.4931 | -1.39857 |
| -0.10302 | 2747 | 15.326 | 0.354   | -0.05375 | 3655 | 21.505 | 7.805  | 1.455258 |
| -0.61412 | 2990 | 7.7258 | 7.9542  | -1.22258 | 2735 | 11.408 | 2.292  | -0.42831 |
| 1.307875 | 4478 | 12.93  | 2.75    | -0.42223 | 4519 | 15.003 | 1.303  | 0.242325 |
| -0.36374 | 4201 | 11.616 | 4.064   | -0.62431 | 4716 | 12.15  | 1.55   | -0.2899  |
| -0.72618 | 3247 | 5.0508 | 10.6292 | -1.63397 | 3352 | 8.0549 | 5.6451 | -1.05383 |
| 0.032715 | 6104 | 17.398 | 1.718   | 0.264903 | 5596 | 16.119 | 2.419  | 0.450513 |
| -0.14521 | 5236 | 14.572 | 1.108   | -0.16971 | 4245 | 13.946 | 0.246  | 0.045145 |
| -0.27693 | 4074 | 9.1311 | 6.5489  | -1.00646 | 3448 | 7.1056 | 6.5944 | -1.23092 |
| -0.23833 | 5135 | 12.522 | 3.158   | -0.48498 | 3815 | 11.769 | 1.931  | -0.36097 |
| -1.32165 | 4805 | 16.483 | 0.803   | 0.124185 | 3019 | 10.732 | 2.968  | -0.55442 |



|          |          |         |         |          |      |        |         |          |
|----------|----------|---------|---------|----------|------|--------|---------|----------|
| 0.019801 | 3143     | 18.549  | 2.869   | 0.441915 | 3705 | 15.304 | 1.604   | 0.298476 |
| 0.556439 | 2554     | 19.303  | 3.623   | 0.557873 | 2985 | 17.521 | 3.821   | 0.712052 |
| 0.193993 | 3395     | 18.085  | 2.405   | 0.370557 | 3580 | 11.788 | 1.912   | -0.35743 |
| -1.03023 | 2378     | 11.648  | 4.032   | -0.61939 | 4515 | 10.698 | 3.002   | -0.56076 |
| 0.251674 | 3049     | 13.873  | 1.807   | -0.27721 | 6232 | 14.409 | 0.709   | 0.131516 |
| 0.370481 | 2872     | 20.299  | 4.619   | 0.711047 | 4161 | 9.0363 | 4.6637  | -0.87075 |
| 1.214322 | 2604     | 22.273  | 6.593   | 1.014628 | 3922 | 16.548 | 2.848   | 0.530542 |
| -0.39444 | 2225     | 12.764  | 2.916   | -0.44776 | 3131 | 13.286 | 0.414   | -0.07798 |
| -0.0198  | 2574     | 20.085  | 4.405   | 0.678136 | 3298 | 18.648 | 4.948   | 0.922292 |
| -0.52745 | 1034     | 14.603  | 1.077   | -0.16494 | 1835 | 15.695 | 1.995   | 0.371416 |
| -0.69031 | 2160     | 12.778  | 2.902   | -0.44561 | 4250 | 11.035 | 2.665   | -0.4979  |
| -0.1894  | 3558     | 20.573  | 4.893   | 0.753186 | 5644 | 16.088 | 2.388   | 0.44473  |
| -0.17304 | 2350     | 21.957  | 6.277   | 0.966031 | 4168 | 16.339 | 2.639   | 0.491553 |
| -0.17563 | 1892     | 21.036  | 5.356   | 0.82439  | 3245 | 18.274 | 4.574   | 0.852523 |
| 1.073419 | 3021     | 21.251  | 5.571   | 0.857455 | 4808 | 19.738 | 6.038   | 1.125629 |
| 0.813566 | 1640     | 28.78   | 13.1    | 2.015339 | 2643 | 21.945 | 8.245   | 1.537339 |
| -0.47637 | 2730     | 16.996  | 1.316   | 0.203079 | 4615 | 14.995 | 1.295   | 0.240833 |
| 0.792043 | 3238     | 23.317  | 7.637   | 1.175185 | 4022 | 19.766 | 6.066   | 1.130852 |
| -0.93668 | 2395     | 10.647  | 5.033   | -0.77333 | 1993 | 11.44  | 2.26    | -0.42234 |
| -0.51899 | 3119     | 16.961  | 1.281   | 0.197697 | 2736 | 15.863 | 2.163   | 0.402756 |
| -0.16558 | 4267     | 8.0384  | 7.6416  | -1.17451 | 3214 | 12.788 | 0.912   | -0.17088 |
| -0.06098 | 4406     | 15.388  | 0.292   | -0.04421 | 4207 | 18.588 | 4.888   | 0.911099 |
| -0.49976 | 3524     | 12.174  | 3.506   | -0.5385  | 5132 | 12.276 | 1.424   | -0.26639 |
| -0.32729 | 3369     | 9.0531  | 6.6269  | -1.01846 | 4135 | 14.51  | 0.81    | 0.150357 |
| -1.0364  | 3378     | 6.6903  | 8.9897  | -1.38183 | 4305 | 10.105 | 3.595   | -0.67139 |
| 0.639374 | 3018     | 16.468  | 0.788   | 0.121878 | 4279 | 19.397 | 5.697   | 1.062016 |
| -1.50475 | 3404     | 10.311  | 5.369   | -0.82501 | 4665 | 14.469 | 0.769   | 0.142709 |
| -2.2816  | 2038     | 4.8577  | 10.8223 | -1.66367 | 3101 | 7.9652 | 5.7348  | -1.07056 |
| -1.03755 | 2487     | 15.239  | 0.441   | -0.06713 | 3495 | 13.619 | 0.081   | -0.01586 |
| -1.36151 | 2601     | 9.6117  | 6.0683  | -0.93255 | 3574 | 9.9888 | 3.7112  | -0.69306 |
| -0.60809 | 3649     | 10.003  | 5.677   | -0.87237 | 4516 | 14.128 | 0.428   | 0.079096 |
| 1.843795 | 2758     | 16.28   | 0.6     | 0.092966 | 4119 | 24.035 | 10.335  | 1.927224 |
| -0.89263 | 4723     | 10.481  | 5.199   | -0.79886 | 4137 | 16.606 | 2.906   | 0.541361 |
| 0.216951 | 4055     | 11.171  | 4.509   | -0.69275 | 3492 | 12.543 | 1.157   | -0.21658 |
| -1.49647 | 3345     | 9.2078  | 6.4722  | -0.99467 | 4120 | 11.068 | 2.632   | -0.49174 |
| -1.45018 | 2431     | 6.088   | 9.592   | -1.47446 | 2331 | 14.286 | 0.586   | 0.108571 |
| -1.12364 | 4330     | 8.776   | 6.904   | -1.06107 | 4588 | 10.615 | 3.085   | -0.57625 |
| -1.68009 | 5107     | 7.1275  | 8.5525  | -1.3146  | 4087 | 10.717 | 2.983   | -0.55722 |
| -0.78602 | 5158     | 12.233  | 3.447   | -0.52942 | 4158 | 16.354 | 2.654   | 0.494351 |
|          | 4051     | 15.6755 | 4.3935  |          | 3628 | 13.704 | 3.622   |          |
|          |          |         | 13.1805 |          |      |        | 10.866  |          |
|          |          |         | 6.50238 |          |      |        | 5.36056 |          |
| 5192     | 61.267   |         | 4438    | 40.514   |      |        |         |          |
| 4320     | 57.361   |         | 3287    | 52.997   |      |        |         |          |
| 4181     | 46.616   |         | 3300    | 52.091   |      |        |         |          |
| 4071     | 52.321   |         | 4617    | 45.094   |      |        |         |          |
| 4441     | 54.39125 |         | 3910.5  | 47.674   |      |        |         |          |

|          |          |          |          |
|----------|----------|----------|----------|
| 510.9279 | 6.346542 | 716.2078 | 5.937626 |
| 1895     | 19.103   | 1972     | 3.9554   |
| 2025     | 18.765   | 1251     | 9.9121   |
| 1821     | 13.729   | 2072     | 14.189   |
| 1754     | 9.8632   | 3084     | 11.349   |
| 1866.667 | 14.11907 | 2135.667 | 11.8167  |
| 141.1536 | 4.463701 | 918.157  | 2.176471 |
|          | 0        |          | 17.81288 |
|          | 13.3911  |          | 6.529413 |
|          | 13.3911  |          | 24.34229 |
|          | 40.27218 |          | 35.8573  |
|          | 0.332515 |          | 0.678866 |
|          | 0.667485 |          | 0.321134 |
| 816      | 25.735   | 880      | 21.591   |
| 757      | 13.474   | 425      | 30.118   |
| 3596     | 18.215   | 3438     | 14.02    |
| 3833     | 12.81    | 3805     | 10.145   |
| 5378     | 27.241   | 7740     | 30.491   |
| 6269     | 27.389   | 5206     | 16.116   |

y

y

y

y

y

y

y

x

debris a,b



x      debris b



|           |                        |                 | cell ct | % inf  | AD      |
|-----------|------------------------|-----------------|---------|--------|---------|
| 50068 A02 | M-007095- tripartite r | 84851 TRIM52    | 3884    | 11.432 | 6.408   |
| 50068 A04 | M-014989- hypothetic   | 84848 MGC16121  | 4315    | 17.312 | 0.528   |
| 50068 A05 | M-018614- zinc finger  | 84364 ZNF289    | 4116    | 20.627 | 2.787   |
| 50068 A06 | M-014988- hypothetic   | 84847 MGC16075  | 3759    | 12.264 | 5.576   |
| 50068 A07 | M-014889- small nucle  | 84366 PRAC      | 3980    | 12.06  | 5.78    |
| 50068 A08 | M-014987- PHD finger   | 84844 PHF5A     | 1907    | 24.489 | 6.649   |
| 50068 A09 | M-013558- hook homc    | 84376 HOOK3     | 3879    | 25.625 | 7.785   |
| 50068 A10 | M-014986- hypothetic   | 84843 MGC15705  | 3323    | 18.026 | 0.186   |
| 50068 A11 | M-003653- chromoson    | 84417 C2orf40   | 2935    | 11.789 | 6.051   |
| 50068 A12 | M-014985- 4-hydroxyp   | 84842 HPDL      | 2627    | 12.219 | 5.621   |
| 50068 A13 | M-018616- chromoson    | 84418 C5orf32   | 2537    | 8.8687 | 8.9713  |
| 50068 A14 | M-014984- hypothetic   | 84841 MGC15634  | 2487    | 19.582 | 1.742   |
| 50068 A15 | M-021496- chromoson    | 84419 C15orf48  | 2826    | 31.953 | 14.113  |
| 50068 A16 | M-016157- retina and   | 84839 RAXL1     | 2626    | 18.203 | 0.363   |
| 50068 A17 | M-004219- caspase rec  | 84433 CARD11    | 3394    | 18.739 | 0.899   |
| 50068 A18 | M-014983- zinc finger  | 84838 ZNF496    | 2483    | 11.639 | 6.201   |
| 50068 A19 | M-014891- zinc finger  | 84436 ZNF528    | 3102    | 13.314 | 4.526   |
| 50068 A20 | M-009831- abhydrolas   | 84836 ABHD14B   | 4510    | 26.497 | 8.657   |
| 50068 A21 | M-026510- KIAA1826     | 84437 KIAA1826  | 3317    | 9.5267 | 8.3133  |
| 50068 A23 | M-022058- KIAA1822     | 84439 KIAA1822  | 3418    | 15.828 | 2.012   |
| 50068 B02 | M-019119- KIAA1737     | 85457 KIAA1737  | 2687    | 5.7313 | 12.1087 |
| 50068 B04 | M-015106- tankyrase 1  | 85456 TNKS1BP1  | 3000    | 15.1   | 2.74    |
| 50068 B05 | M-018181- hypothetic   | 84856 MGC16291  | 2750    | 9.0182 | 8.8218  |
| 50068 B06 | M-013729- dispatched   | 85455 DISP2     | 4409    | 14.947 | 2.893   |
| 50068 B07 | M-015846- zinc finger  | 84858 ZNF503    | 3334    | 11.428 | 6.412   |
| 50068 B08 | M-025222- KIAA1751     | 85452 KIAA1751  | 3413    | 8.9364 | 8.9036  |
| 50068 B09 | M-014993- leucine-rich | 84859 LRCH3     | 3003    | 10.856 | 6.984   |
| 50068 B10 | M-022950- unkempt h    | 85451 UNK       | 2479    | 18.959 | 1.119   |
| 50068 B11 | M-015847- kelch-like 2 | 84861 KLHL22    | 2762    | 8.4359 | 9.4041  |
| 50068 B12 | M-015104- KIAA1754     | 85450 KIAA1754  | 2187    | 9.1449 | 8.6951  |
| 50068 B13 | M-016031- MYC induc    | 84864 MINA      | 3240    | 13.395 | 4.445   |
| 50068 B14 | M-024163- KIAA1755 p   | 85449 RP5-1054A | 3112    | 7.6478 | 10.1922 |
| 50068 B15 | M-018182- hypothetic   | 84865 FLJ14397  | 2179    | 7.6641 | 10.1759 |
| 50068 B16 | M-021916- zinc finger  | 85446 ZFHX2     | 2806    | 16.964 | 0.876   |
| 50068 B17 | M-008420- carbonyl re  | 84869 CBR4      | 2541    | 25.58  | 7.74    |
| 50068 B18 | M-013728- contactin a  | 85445 CNTNAP4   | 3169    | 13.443 | 4.397   |
| 50068 B19 | M-012849- R-spondin    | 84870 RSPO3     | 2524    | 14.937 | 2.903   |
| 50068 B20 | M-025887- leucine rich | 85444 LRRCC1    | 2493    | 15.564 | 2.276   |
| 50068 B21 | M-014994- ATP/GTP bi   | 84871 AGBL4     | 4152    | 15.125 | 2.715   |
| 50068 B23 | M-014995- zinc finger  | 84872 ZC3H10    | 3732    | 17.658 | 0.182   |
| 50068 C02 | M-014982- upregulate   | 84833 USMG5     | 6399    | 25.426 | 7.586   |
| 50068 C04 | M-014980- chromoson    | 84830 C6orf105  | 4992    | 21.374 | 3.534   |
| 50068 C05 | M-018023- RAB11 fam    | 84440 RAB11FIP4 | 3109    | 16.79  | 1.05    |
| 50068 C06 | M-018317- SFT2 doma    | 84826 SFT2D3    | 4861    | 29.521 | 11.681  |
| 50068 C07 | M-024802- FERM and l   | 84443 FRMPD3    | 3003    | 18.914 | 1.074   |
| 50068 C08 | M-014977- hypothetic   | 84821 MGC13168  | 4457    | 21.158 | 3.318   |

|           |                        |                |      |        |        |
|-----------|------------------------|----------------|------|--------|--------|
| 50068 C09 | M-014900- DOT1-like,   | 84444 DOT1L    | 2742 | 25.237 | 7.397  |
| 50068 C10 | M-007945- interleukin  | 84818 IL17RC   | 3943 | 28.405 | 10.565 |
| 50068 C11 | M-026306- leucine zip  | 84445 LZTS2    | 2857 | 17.396 | 0.444  |
| 50068 C12 | M-015928- thioredoxir  | 84817 TXNL5    | 2368 | 23.775 | 5.935  |
| 50068 C13 | M-007090- synovial ap  | 84447 SYVN1    | 1901 | 14.571 | 3.269  |
| 50068 C14 | M-010131- reticulon 4  | 84816 RTN4IP1  | 1858 | 24.058 | 6.218  |
| 50068 C15 | M-014893- zinc finger  | 84449 ZNF333   | 3475 | 19.885 | 2.045  |
| 50068 C16 | M-014976- phosphatid   | 84814 PPAPDC3  | 4178 | 27.382 | 9.542  |
| 50068 C17 | M-007091- zinc finger  | 84450 ZNF512   | 2982 | 24.95  | 7.11   |
| 50068 C18 | M-005065- phospholip   | 84812 PLCD4    | 3308 | 26.421 | 8.581  |
| 50068 C19 | M-021807- KIAA1799 p   | 84455 KIAA1799 | 2737 | 12.751 | 5.089  |
| 50068 C20 | M-014974- BUD13 hor    | 84811 BUD13    | 4101 | 28.773 | 10.933 |
| 50068 C21 | M-024729- l(3)mbt-like | 84456 L3MBTL3  | 4970 | 19.678 | 1.838  |
| 50068 C23 | M-014894- phytanoyl-l  | 84457 PHYHIPL  | 7158 | 19.307 | 1.467  |
| 50068 D02 | M-026275- kinase non-  | 85442 KNDC1    | 4777 | 11.304 | 6.536  |
| 50068 D04 | M-031725- dedicator c  | 85440 DOCK7    | 5243 | 19.168 | 1.328  |
| 50068 D05 | M-014996- zinc finger  | 84874 ZNF514   | 4935 | 18.257 | 0.417  |
| 50068 D06 | M-016182- stonin 2     | 85439 STON2    | 3783 | 17.843 | 0.003  |
| 50068 D07 | M-014997- poly (ADP-r  | 84875 PARP10   | 4196 | 25.882 | 8.042  |
| 50068 D08 | M-018644- chromoson    | 85438 C4orf35  | 5109 | 13.369 | 4.471  |
| 50068 D09 | M-014998- transmemk    | 84876 TMEM142/ | 3838 | 18.343 | 0.503  |
| 50068 D10 | M-016700- zinc finger  | 85437 ZCRB1    | 4187 | 21.4   | 3.56   |
| 50068 D11 | M-016698- zinc finger  | 84878 ZBTB45   | 3879 | 14.23  | 3.61   |
| 50068 D12 | M-013668- Zic family n | 85416 ZIC5     | 3338 | 16.687 | 1.153  |
| 50068 D13 | M-014999- major facili | 84879 MFSD2    | 4197 | 17.846 | 0.006  |
| 50068 D14 | M-016798- rhophilin, F | 85415 RHPN2    | 3956 | 8.822  | 9.018  |
| 50068 D15 | M-015000- RNA pseud    | 84881 RPUSD4   | 2242 | 18.064 | 0.224  |
| 50068 D16 | M-004231- solute carri | 85414 SLC45A3  | 2963 | 8.9436 | 8.8964 |
| 50068 D17 | M-016296- zinc finger, | 84885 ZDHHC12  | 3318 | 15.793 | 2.047  |
| 50068 D18 | M-007450- solute carri | 85413 SLC22A16 | 4800 | 16.812 | 1.028  |
| 50068 D19 | M-015001- chromoson    | 84886 C1orf198 | 4142 | 17.335 | 0.505  |
| 50068 D20 | M-021297- chromoson    | 85411 C6orf114 | 3797 | 17.303 | 0.537  |
| 50068 D21 | M-006040- signal pept  | 84888 SPPL2A   | 5919 | 21.524 | 3.684  |
| 50068 D23 | M-007614- solute carri | 84889 SLC7A3   | 4295 | 13.062 | 4.778  |
| 50068 E02 | M-031715- chromoson    | 84808 C1orf170 | 6064 | 14.726 | 3.114  |
| 50068 E04 | M-004227- T-cell activ | 84807 TA-NFKBH | 3917 | 10.85  | 6.99   |
| 50068 E05 | M-026303- ligand depe  | 84458 LCOR     | 4265 | 19.742 | 1.902  |
| 50068 E06 | M-007357- major facili | 84804 MFSD9    | 4906 | 14.798 | 3.042  |
| 50068 E07 | M-024776- zinc finger, | 84460 ZMAT1    | 4662 | 13.213 | 4.627  |
| 50068 E08 | M-010291- lung cancer  | 84803 MAG1     | 3393 | 11.612 | 6.228  |
| 50068 E09 | M-027096- KIAA1786 p   | 84462 KIAA1786 | 3825 | 17.307 | 0.533  |
| 50068 E10 | M-014971- chromoson    | 84798 C19orf48 | 4068 | 20.723 | 2.883  |
| 50068 E11 | M-014895- BTB (POZ) c  | 84464 BTBD12   | 3197 | 15.734 | 2.106  |
| 50068 E12 | M-014970- hypothetic   | 84797 MGC13090 | 2763 | 15.889 | 1.951  |
| 50068 E13 | M-014896- multiple EC  | 84465 MEGF11   | 3773 | 18.659 | 0.819  |
| 50068 E14 | M-014969- hypothetic   | 84796 MGC13053 | 2841 | 11.052 | 6.788  |
| 50068 E15 | M-014897- multiple EC  | 84466 MEGF10   | 3987 | 17.532 | 0.308  |

|           |                        |                 |      |        |         |
|-----------|------------------------|-----------------|------|--------|---------|
| 50068 E16 | M-010185- chromosom    | 84795 C10orf33  | 3495 | 20     | 2.16    |
| 50068 E17 | M-018619- fibrillin 3  | 84467 FBN3      | 3886 | 7.4112 | 10.4288 |
| 50068 E18 | M-014968- hypothetic   | 84792 MGC12966  | 5459 | 22.074 | 4.234   |
| 50068 E19 | M-014898- family with  | 84498 FAM120B   | 3410 | 15.572 | 2.268   |
| 50068 E20 | M-014967- chromosom    | 84791 C1orf97   | 3938 | 16.023 | 1.817   |
| 50068 E21 | M-022605- spire homc   | 84501 SPIRE2    | 3611 | 12.407 | 5.433   |
| 50068 E23 | M-014899- junctophilin | 84502 JPH4      | 6112 | 14.791 | 3.049   |
| 50068 F02 | M-018641- naked cutic  | 85409 NKD2      | 6386 | 17.632 | 0.208   |
| 50068 F04 | M-018984- naked cutic  | 85407 NKD1      | 5084 | 14.26  | 3.58    |
| 50068 F05 | M-015855- chromosom    | 84890 C10orf22  | 5378 | 13.109 | 4.731   |
| 50068 F06 | M-019284- ELL associa  | 85403 EAF1      | 3978 | 14.756 | 3.084   |
| 50068 F07 | M-015002- zinc finger  | 84891 ZSCAN10   | 3525 | 11.433 | 6.407   |
| 50068 F08 | M-008229- regulator o  | 85397 RGS8      | 2931 | 7.7107 | 10.1293 |
| 50068 F09 | M-018718- chromosom    | 84892 C3orf39   | 3532 | 10.306 | 7.534   |
| 50068 F10 | M-015221- chromosom    | 85395 C21orf70  | 3983 | 18.529 | 0.689   |
| 50068 F11 | M-017404- F-box prote  | 84893 FBXO18    | 4397 | 18.558 | 0.718   |
| 50068 F12 | M-024559- KIAA1671 p   | 85379 CTA-221G9 | 2995 | 13.189 | 4.651   |
| 50068 F13 | M-018624- leucine rich | 84894 LINGO1    | 3599 | 14.198 | 3.642   |
| 50068 F14 | M-010118- tubulin, gai | 85378 TUBGCP6   | 2996 | 10.414 | 7.426   |
| 50068 F15 | M-017149- family with  | 84895 FAM73B    | 3396 | 13.84  | 4       |
| 50068 F16 | M-015102- MICAL-like   | 85377 MICALL1   | 2864 | 17.772 | 0.068   |
| 50068 F17 | M-018184- ATPase fan   | 84896 ATAD1     | 3847 | 20.328 | 2.488   |
| 50068 F18 | M-024445- KIAA1666 p   | 85376 KIAA1666  | 3939 | 17.669 | 0.171   |
| 50068 F19 | M-015003- transformin  | 84897 TBRG1     | 3602 | 12.021 | 5.819   |
| 50068 F20 | M-021516- family with  | 85369 FAM40A    | 3735 | 15.77  | 2.07    |
| 50068 F21 | M-015203- plexin dom   | 84898 PLXDC2    | 4109 | 13.921 | 3.919   |
| 50068 F23 | M-015004- transmembr   | 84899 TMTC4     | 2820 | 10.177 | 7.663   |
| 50068 G02 | M-014966- tubulin, alp | 84790 TUBA1C    | 1643 | 8.947  | 8.893   |
| 50068 G04 | M-017148- zinc finger  | 84775 ZNF607    | 4778 | 11.239 | 6.601   |
| 50068 G05 | M-023663- zinc finger  | 84503 ZNF527    | 4478 | 11.791 | 6.049   |
| 50068 G06 | M-014961- hypothetic   | 84773 MGC13010  | 3990 | 16.266 | 1.574   |
| 50068 G07 | M-010588- GH3 domai    | 84514 GHDC      | 3726 | 20.934 | 3.094   |
| 50068 G08 | M-014959- hypothetic   | 84769 FKSG24    | 5457 | 13.304 | 4.536   |
| 50068 G09 | M-017291- minichrom    | 84515 MCM8      | 4645 | 23.574 | 5.734   |
| 50068 G10 | M-010079- SPRY doma    | 84767 SPRYD5    | 4281 | 12.894 | 4.946   |
| 50068 G11 | M-014901- dynactin 5   | 84516 DCTN5     | 3394 | 12.994 | 4.846   |
| 50068 G12 | M-014958- EF-hand ca   | 84766 EFCAB4B   | 3732 | 28.778 | 10.938  |
| 50068 G13 | M-015387- actin relate | 84517 ARPM1     | 4110 | 36.131 | 18.291  |
| 50068 G14 | M-014957- zinc finger  | 84765 ZNF577    | 2557 | 42.511 | 24.671  |
| 50068 G15 | M-014902- cornifelin   | 84518 CNFN      | 3098 | 40.93  | 23.09   |
| 50068 G16 | M-015099- hypothetic   | 84752 MGC4655   | 4881 | 18.336 | 0.496   |
| 50068 G17 | M-019003- jagunal hor  | 84522 JAGN1     | 5054 | 20.578 | 2.738   |
| 50068 G18 | M-008931- fucosyltran  | 84750 FUT10     | 2407 | 15.123 | 2.717   |
| 50068 G19 | M-014903- zinc finger  | 84524 ZC3H8     | 5940 | 26.953 | 9.113   |
| 50068 G20 | M-014950- hypothetic   | 84740 MGC10981  | 5225 | 29.301 | 11.461  |
| 50068 G21 | M-013413- homeodor     | 84525 HOP       | 6473 | 25.29  | 7.45    |
| 50068 G23 | M-014904- zinc finger  | 84527 ZNF559    | 5858 | 31.922 | 14.082  |

|                  |                              |                      |             |               |               |
|------------------|------------------------------|----------------------|-------------|---------------|---------------|
| 50068 H02        | M-017978- zinc finger,       | 85364 ZCCHC3         | 4316        | 30.885        | 13.045        |
| 50068 H04        | M-007100- tripartite r       | 85363 TRIM5          | 4998        | 22.909        | 5.069         |
| 50068 H05        | M-007097- transmemk          | 84900 TMEM118        | 3919        | 10.487        | 7.353         |
| 50068 H06        | M-016827- chromoson          | 85362 C20orf158      | 5603        | 22.702        | 4.862         |
| 50068 H07        | M-018625- nuclear fac        | 84901 NFATC2IP       | 3648        | 22.999        | 5.159         |
| <b>50068 H08</b> | <b>M-013705- DiGeorge s</b>  | <b>85359 DGCR6L</b>  | <b>4798</b> | <b>40.496</b> | <b>22.656</b> |
| 50068 H09        | M-021334- coiled-coil        | 84902 CCDC123        | 3738        | 28.117        | 10.277        |
| 50068 H10        | M-031491- KIAA1644 p         | 85352 KIAA1644       | 3852        | 16.822        | 1.018         |
| 50068 H11        | M-015005- hypothetic         | 84903 FLJ14641       | 3445        | 17.997        | 0.157         |
| 50068 H12        | M-018890- B melanom          | 85319 BAGE2          | 3168        | 11.458        | 6.382         |
| 50068 H13        | M-015264- zinc finger        | 84905 ZNF341         | 2892        | 20.678        | 2.838         |
| 50068 H14        | M-018894- B melanom          | 85318 BAGE3          | 3437        | 19.319        | 1.479         |
| 50068 H15        | M-015007- hypothetic         | 84908 FLJ14668       | 3466        | 13.993        | 3.847         |
| 50068 H16        | M-007820- progestin a        | 85315 PAQR8          | 4386        | 22.481        | 4.641         |
| <b>50068 H17</b> | <b>M-015008- transmemk</b>   | <b>84910 TMEM87B</b> | <b>4367</b> | <b>39.707</b> | <b>21.867</b> |
| 50068 H18        | M-010401- peptidylprc        | 85313 PPIL4          | 3595        | 20.473        | 2.633         |
| 50068 H19        | M-018627- zinc finger        | 84911 ZNF382         | 3963        | 19.404        | 1.564         |
| 50068 H20        | M-030807- Fas (TNFRS         | 85302 FBF1           | 3771        | 19.226        | 1.386         |
| 50068 H21        | M-007545- solute carri       | 84912 SLC35B4        | 6542        | 34.668        | 16.828        |
| 50068 H23        | M-015010- chromoson          | 84915 C12orf34       | 4116        | 11.832        | 6.008         |
| 50068 I02        | M-005824- carnosine c        | 84735 CNDP1          | 4320        | 14.398        | 3.442         |
| 50068 I04        | M-008357- chromobo>          | 84733 CBX2           | 5010        | 24.511        | 6.671         |
| 50068 I05        | M-014905- PEPP subfa         | 84528 PEPP-2         | 5233        | 20.485        | 2.645         |
| 50068 I06        | M-014948- hypothetic         | 84730 MGC2452        | 3442        | 22.777        | 4.937         |
| 50068 I07        | M-014906- chromoson          | 84529 C15orf41       | 3586        | 33.993        | 16.153        |
| 50068 I08        | M-014947- splA/ryano         | 84727 SPSB2          | 4634        | 21.515        | 3.675         |
| 50068 I09        | M-030175- KIAA1853           | 84530 KIAA1853       | 3776        | 15.89         | 1.95          |
| 50068 I10        | M-004320- pleckstrin f       | 84725 PLEKHA8        | 4268        | 18.51         | 0.67          |
| 50068 I11        | M-015219- chromoson          | 84536 C21orf67       | 4192        | 27.6          | 9.76          |
| 50068 I12        | M-008728- phosphatid         | 84720 PIGO           | 4832        | 27.276        | 9.436         |
| 50068 I13        | M-015220- chromoson          | 84537 C21orf69       | 4329        | 26.912        | 9.072         |
| 50068 I14        | M-014945- hypothetic         | 84719 MGC5457        | 3387        | 16.74         | 1.1           |
| 50068 I15        | M-028015- KIAA1843 p         | 84540 KIAA1843       | 4630        | 33.218        | 15.378        |
| <b>50068 I16</b> | <b>M-014944- hepatoma-</b>   | <b>84717 HDGF2</b>   | <b>4864</b> | <b>33.326</b> | <b>15.486</b> |
| 50068 I17        | M-014907- kelch repea        | 84541 KBTBD8         | 5564        | 15.421        | 2.419         |
| 50068 I18        | M-010682- ovary-spec         | 84709 OSAP           | 4438        | 20.82         | 2.98          |
| 50068 I19        | M-022692- KIAA1841           | 84542 KIAA1841       | 7098        | 37.532        | 19.692        |
| <b>50068 I20</b> | <b>M-014939- brain expre</b> | <b>84707 BEX2</b>    | <b>4927</b> | <b>36.432</b> | <b>18.592</b> |
| 50068 I21        | M-019126- mitochond          | 84545 MRPL43         | 6817        | 19.818        | 1.978         |
| 50068 I23        | M-013578- piggyBac tr        | 84547 PGBD1          | 5425        | 24.848        | 7.008         |
| 50068 J02        | M-018800- collagen, ty       | 85301 COL27A1        | 6452        | 17.855        | 0.015         |
| 50068 J04        | M-027139- ataxia, cere       | 85300 ATCAY          | 5876        | 24.115        | 6.275         |
| 50068 J05        | M-015014- FLT3-intera        | 84922 FIZ1           | 5786        | 12.703        | 5.137         |
| 50068 J06        | M-013663- keratin ass        | 85293 KRTAP3-3       | 5195        | 21.713        | 3.873         |
| 50068 J07        | M-015015- family with        | 84923 FAM104A        | 5742        | 17.99         | 0.15          |
| 50068 J08        | M-030880- keratin ass        | 85286 KRTAP4-9       | 4661        | 21.583        | 3.743         |
| 50068 J09        | M-015016- zinc finger        | 84924 ZNF566         | 5159        | 30.781        | 12.941        |

|           |                        |                 |      |        |        |
|-----------|------------------------|-----------------|------|--------|--------|
| 50068 J10 | M-013656- keratin assi | 85285 KRTAP4-10 | 4403 | 18.26  | 0.42   |
| 50068 J11 | M-015017- SPRY doma    | 84926 SPRYD3    | 4095 | 17.631 | 0.209  |
| 50068 J12 | M-013323- histone clu  | 85236 HIST1H2BK | 3628 | 26.571 | 8.731  |
| 50068 J13 | M-015018- hypothetic   | 84928 FLJ14803  | 4391 | 20.314 | 2.474  |
| 50068 J14 | M-013324- histone clu  | 85235 HIST1H2AF | 4654 | 21.659 | 3.819  |
| 50068 J15 | M-007908- fibrinogen   | 84929 FIBCD1    | 3545 | 16.812 | 1.028  |
| 50068 J16 | M-027562- chromoson    | 85028 C1orf79   | 5913 | 21.191 | 3.351  |
| 50068 J17 | M-015019- hypothetic   | 84931 FLJ14816  | 4366 | 18.346 | 0.506  |
| 50068 J18 | M-007099- chromoson    | 85026 C9orf37   | 5220 | 23.065 | 5.225  |
| 50068 J19 | M-010370- RAB2B, me    | 84932 RAB2B     | 5249 | 27.262 | 9.422  |
| 50068 J20 | M-015052- transmemk    | 85025 TMEM60    | 4809 | 18.715 | 0.875  |
| 50068 J21 | M-015020- chromoson    | 84933 C8orf76   | 4182 | 16.571 | 1.269  |
| 50068 J23 | M-015021- chromoson    | 84934 C12orf52  | 4011 | 18.724 | 0.884  |
| 50068 K02 | M-004173- glutamic py  | 84706 GPT2      | 5480 | 11.679 | 6.161  |
| 50068 K04 | M-014938- GTP bindin   | 84705 GTPBP3    | 6217 | 12.611 | 5.229  |
| 50068 K05 | M-014908- transmemk    | 84548 TMEM185   | 5654 | 14.096 | 3.744  |
| 50068 K06 | M-013590- cytochrom    | 84701 COX4I2    | 6422 | 21.52  | 3.68   |
| 50068 K07 | M-018620- RNA bindin   | 84549 RBM13     | 5223 | 17.787 | 0.053  |
| 50068 K08 | M-015302- myosin XVI   | 84700 MYO18B    | 6734 | 20.775 | 2.935  |
| 50068 K09 | M-014909- par-6 partit | 84552 PARD6G    | 4393 | 17.778 | 0.062  |
| 50068 K10 | M-014937- cAMP respo   | 84699 CREB3L3   | 5723 | 20.129 | 2.289  |
| 50068 K11 | M-014910- chromoson    | 84553 C6orf168  | 5009 | 17.449 | 0.391  |
| 50068 K12 | M-014936- calcyphosir  | 84698 CAPS2     | 4120 | 18.859 | 1.019  |
| 50068 K13 | M-013579- microtubul   | 84557 MAP1LC3A  | 4726 | 22.852 | 5.012  |
| 50068 K14 | M-014935- connexin 6   | 84694 CX62      | 5232 | 20.814 | 2.974  |
| 50068 K15 | M-014890- metallothic  | 84560 MT4       | 5064 | 16.785 | 1.055  |
| 50068 K16 | M-016691- methylmal    | 84693 MCEE      | 6878 | 31.419 | 13.579 |
| 50068 K17 | M-007389- solute carri | 84561 SLC12A8   | 4263 | 22.191 | 4.351  |
| 50068 K18 | M-018621- coiled-coil  | 84692 CCDC54    | 5072 | 17.764 | 0.076  |
| 50068 K19 | M-015672- lysozyme-li  | 84569 LYZL1     | 4668 | 18.445 | 0.605  |
| 50068 K20 | M-014934- testes deve  | 84691 NYD-SP18  | 4674 | 18.271 | 0.431  |
| 50068 K21 | M-014912- collagen, ty | 84570 COL25A1   | 4744 | 16.02  | 1.82   |
| 50068 K23 | M-014913- N-acetylglu  | 84572 GNPTG     | 5256 | 16.762 | 1.078  |
| 50068 L02 | M-014753- RALBP1 ass   | 85021 REPS1     | 6384 | 23.606 | 5.766  |
| 50068 L04 | M-015051- chromoson    | 85019 C18orf45  | 6009 | 17.441 | 0.399  |
| 50068 L05 | M-016348- chromoson    | 84935 C13orf33  | 5703 | 19.499 | 1.659  |
| 50068 L06 | M-015050- chromoson    | 85016 C11orf70  | 5952 | 23.068 | 5.228  |
| 50068 L07 | M-017961- zinc finger, | 84936 ZFYVE19   | 5608 | 16.78  | 1.06   |
| 50068 L08 | M-010054- ubiquitin sp | 85015 USP45     | 5751 | 13.737 | 4.103  |
| 50068 L09 | M-007098- zinc and rir | 84937 ZNRF1     | 6586 | 21.546 | 3.706  |
| 50068 L10 | M-015049- transmemk    | 85014 TMEM141   | 6808 | 22.929 | 5.089  |
| 50068 L11 | M-005788- ATG4 autoj   | 84938 ATG4C     | 5356 | 19.529 | 1.689  |
| 50068 L12 | M-015048- transmemk    | 85013 TMEM128   | 4198 | 19.295 | 1.455  |
| 50068 L13 | M-019083- melanoma     | 84939 MUM1      | 4275 | 10.713 | 7.127  |
| 50068 L14 | M-018635- transcriptic | 85012 TCEAL3    | 5015 | 12.203 | 5.637  |
| 50068 L15 | M-015022- coronin 6    | 84940 CORO6     | 5935 | 10.059 | 7.781  |
| 50068 L16 | M-008968- alanine-gly  | 85007 AGXT2L2   | 6678 | 21.114 | 3.274  |

|           |                        |                 |      |        |        |
|-----------|------------------------|-----------------|------|--------|--------|
| 50068 L17 | M-015023- hematopoi    | 84941 HSH2D     | 6846 | 19.793 | 1.953  |
| 50068 L18 | M-021293- chromoson    | 85006 C21orf124 | 7225 | 36.028 | 18.188 |
| 50068 L19 | M-015024- WD repeat    | 84942 WDR73     | 6738 | 30.84  | 13     |
| 50068 L20 | M-008204- RAS-like, es | 85004 RERG      | 5839 | 18.702 | 0.862  |
| 50068 L21 | M-015025- maelstrom    | 84944 MAEL      | 5871 | 28.496 | 10.656 |
| 50068 L23 | M-005874- abhydrolas   | 84945 ABHD13    | 4880 | 16.209 | 1.631  |
| 50068 M02 | M-016751- spermatog    | 84690 SPATA22   | 6534 | 22.391 | 4.551  |
| 50068 M04 | M-017476- chromoson    | 84688 C9orf24   | 6993 | 24.124 | 6.284  |
| 50068 M05 | M-010681- par-6 partit | 84612 PARD6B    | 5728 | 26.816 | 8.976  |
| 50068 M06 | M-014931- histidine tr | 84681 HINT2     | 6759 | 18.923 | 1.083  |
| 50068 M07 | M-014914- zinc finger  | 84614 ZBTB37    | 7461 | 27.409 | 9.569  |
| 50068 M08 | M-009753- 1-aminocyc   | 84680 PHACS     | 5365 | 29.152 | 11.312 |
| 50068 M09 | M-009895- 5'-nucleoti  | 84618 NT5C1A    | 7148 | 22.552 | 4.712  |
| 50068 M10 | M-007627- solute carri | 84679 SLC9A7    | 5712 | 22.689 | 4.849  |
| 50068 M11 | M-019064- zinc finger, | 84619 ZGPAT     | 5628 | 25.675 | 7.835  |
| 50068 M12 | M-014930- F-box and I  | 84678 FBXL10    | 5006 | 16.6   | 1.24   |
| 50068 M13 | M-008402- ST6 beta-ga  | 84620 ST6GAL2   | 4371 | 33.608 | 15.768 |
| 50068 M14 | M-014929- Down synd    | 84677 DSCR8     | 5387 | 15.797 | 2.043  |
| 50068 M15 | M-023003- zinc finger  | 84622 ZNF594    | 6064 | 15.765 | 2.075  |
| 50068 M16 | M-007093- tripartite r | 84676 TRIM63    | 6570 | 27.656 | 9.816  |
| 50068 M17 | M-021455- kin of IRRE  | 84623 KIRREL3   | 6445 | 29.682 | 11.842 |
| 50068 M18 | M-007092- tripartite r | 84675 TRIM55    | 5931 | 22.189 | 4.349  |
| 50068 M19 | M-024901- fibronectin  | 84624 FNDC1     | 6700 | 16.104 | 1.736  |
| 50068 M20 | M-006080- ubiquitin s  | 84669 USP32     | 7550 | 24.49  | 6.65   |
| 50068 M21 | M-025366- KRAB-A do    | 84626 KRBA1     | 5935 | 17.27  | 0.57   |
| 50068 M23 | M-022608- zinc finger  | 84627 ZNF469    | 4347 | 29.377 | 11.537 |
| 50068 N02 | M-015044- ubiquitin-li | 84993 UBL7      | 3635 | 8.5282 | 9.3118 |
| 50068 N04 | M-015043- phosphatid   | 84992 PIGY      | 5080 | 17.598 | 0.242  |
| 50068 N05 | M-016354- LTV1 homc    | 84946 LTV1      | 5216 | 10.429 | 7.411  |
| 50068 N06 | M-005158- RNA bindin   | 84991 RBM17     | 6231 | 23.11  | 5.27   |
| 50068 N07 | M-015026- serine activ | 84947 SERAC1    | 5564 | 14.252 | 3.588  |
| 50068 N08 | M-015041- chromoson    | 84987 C12orf62  | 4566 | 15.506 | 2.334  |
| 50068 N09 | M-013595- tigger trans | 84948 TIGD5     | 5705 | 10.552 | 7.288  |
| 50068 N10 | M-018322- Rho GTPas    | 84986 ARHGAP19  | 4210 | 15.891 | 1.949  |
| 50068 N11 | M-014833- PRP38 pre-   | 84950 PRPF38A   | 3295 | 13.536 | 4.304  |
| 50068 N12 | M-015040- family with  | 84985 FAM83A    | 2807 | 13.894 | 3.946  |
| 50068 N13 | M-010589- tensin 4     | 84951 TNS4      | 3607 | 21.431 | 3.591  |
| 50068 N14 | M-015039- chromoson    | 84984 C3orf34   | 4021 | 20.095 | 2.255  |
| 50068 N15 | M-019002- cingulin-lik | 84952 CGNL1     | 4348 | 13.408 | 4.432  |
| 50068 N16 | M-015036- FERM dom     | 84978 FRMD5     | 4808 | 15.807 | 2.033  |
| 50068 N17 | M-015027- MICAL C-te   | 84953 MICALCL   | 4808 | 14.621 | 3.219  |
| 50068 N18 | M-013596- dispatched   | 84976 DISP1     | 4597 | 18.73  | 0.89   |
| 50068 N19 | M-018630- MPN doma     | 84954 MPND      | 3763 | 12.463 | 5.377  |
| 50068 N20 | M-018634- major facili | 84975 MFSD5     | 4286 | 16.356 | 1.484  |
| 50068 N21 | M-018185- NudC dom     | 84955 NUDCD1    | 4740 | 10.401 | 7.439  |
| 50068 N23 | M-010429- synaptotag   | 84958 SYTL1     | 4074 | 16.2   | 1.64   |
| 50068 O02 | M-017147- family with  | 84668 FAM126A   | 6487 | 19.3   | 1.46   |

|           |                         |                 |        |          |         |
|-----------|-------------------------|-----------------|--------|----------|---------|
| 50068 O04 | M-014927- resistin like | 84666 RETNLB    | 4448   | 19.852   | 2.012   |
| 50068 O05 | M-021292- netrin G2     | 84628 NTNG2     | 5446   | 32.372   | 14.532  |
| 50068 O06 | M-010902- myopalladi    | 84665 MYPN      | 4230   | 13.877   | 3.963   |
| 50068 O07 | M-014915- SLIT and N1   | 84631 SLITRK2   | 5579   | 16.257   | 1.583   |
| 50068 O08 | M-014926- chondroitin   | 84664 CSPG4LYP2 | 5318   | 17.356   | 0.484   |
| 50068 O09 | M-014917- actin filame  | 84632 AFAP1L2   | 4501   | 19.951   | 2.111   |
| 50068 O10 | M-014925- chromosom     | 84663 CYorf15B  | 4747   | 29.492   | 11.652  |
| 50068 O11 | M-007954- interleukin   | 84639 IL1F10    | 4070   | 12.26    | 5.58    |
| 50068 O12 | M-014923- dpy-30-like   | 84661 HDPY-30   | 2691   | 11.334   | 6.506   |
| 50068 O13 | M-014918- hippocamp     | 84641 HIATL1    | 4280   | 17.967   | 0.127   |
| 50068 O14 | M-018085- coiled-coil   | 84660 CCDC62    | 4506   | 26.254   | 8.414   |
| 50068 O15 | M-016823- chromosom     | 84645 C22orf23  | 2679   | 15.416   | 2.424   |
| 50068 O16 | M-018193- ribonuclea    | 84659 RNASE7    | 4789   | 20.422   | 2.582   |
| 50068 O17 | M-010290- phospholip    | 84647 PLA2G12B  | 4562   | 16.616   | 1.224   |
| 50068 O18 | M-008332- cytokine-li   | 84656 N-PAC     | 4559   | 23.448   | 5.608   |
| 50068 O19 | M-009333- diacylglyce   | 84649 DGAT2     | 4798   | 22.072   | 4.232   |
| 50068 O20 | M-015845- spermatog     | 84654 SPZ1      | 5248   | 22.999   | 5.159   |
| 50068 O21 | M-014920- emopamil l    | 84650 EBPL      | 5787   | 29.031   | 11.191  |
| 50068 O23 | M-014921- serine pept   | 84651 SPINK7    | 4112   | 10.263   | 7.577   |
| 50068 P02 | M-015034- transmemk     | 84972 TMEM137   | 3997   | 15.387   | 2.453   |
| 50068 P04 | M-005790- ATG4 auto     | 84971 ATG4D     | 3096   | 15.536   | 2.304   |
| 50068 P05 | M-008533- Cbl-interac   | 84959 STS-1     | 5199   | 25.851   | 8.011   |
| 50068 P06 | M-015033- chromosom     | 84970 C1orf94   | 4233   | 6.7801   | 11.0599 |
| 50068 P07 | M-014951- hypothetic    | 84744 MGC10701  | 4802   | 21.095   | 3.255   |
| 50068 P08 | M-015032- TOX high r    | 84969 TOX2      | 4918   | 20.13    | 2.29    |
| 50068 P09 | M-014949- chromosom     | 84734 C1orf90   | 4669   | 9.9807   | 7.8593  |
| 50068 P10 | M-018632- paraneopla    | 84968 PNMA6A    | 4735   | 15.692   | 2.148   |
| 50068 P11 | M-014972- chromosom     | 84800 C14orf151 | 4206   | 16.548   | 1.292   |
| 50068 P12 | M-015031- LSM10, U7     | 84967 LSM10     | 2565   | 14.035   | 3.805   |
| 50068 P13 | M-014933- MS4A13 pr     | 84689 NYD-SP21  | 3002   | 14.091   | 3.749   |
| 50068 P14 | M-018631- immunogl      | 84966 IGSF21    | 4884   | 15.766   | 2.074   |
| 50068 P15 | M-013582- keratin ass   | 84616 KRTAP4-4  | 5657   | 17.147   | 0.693   |
| 50068 P16 | M-015030- alkB, alkyla  | 84964 ALKBH6    | 3331   | 13.029   | 4.811   |
| 50068 P17 | M-008567- ARD1 hom      | 84779 ARD1B     | 4601   | 13.932   | 3.908   |
| 50068 P18 | M-021473- jub, ajuba f  | 84962 JUB       | 4998   | 18.988   | 1.148   |
| 50068 P19 | M-014919- late cornifi  | 84648 LCE3D     | 3799   | 10.74    | 7.1     |
| 50068 P20 | M-018319- KIAA1984      | 84960 KIAA1984  | 5018   | 10.701   | 7.139   |
| 50068 P21 | M-021300- hematolog     | 90861 HN1L      | 3348   | 7.4074   | 10.4326 |
| 50068 P23 | M-017713- splA/ryano    | 90864 SPSB3     | 3401   | 7.1744   | 10.6656 |
|           |                         | MAD             | 4315.5 | 17.8445  | 3.9135  |
|           |                         | 3MAD            |        |          | 11.7405 |
|           |                         | MADc            |        |          | 5.79198 |
| 50068 C22 |                         |                 | 3795   | 57.444   |         |
| 50068 D22 |                         |                 | 5112   | 49.237   |         |
| 50068 E22 |                         |                 | 3110   | 45.691   |         |
| 50068 F22 |                         |                 | 4071   | 52.395   |         |
|           |                         | mn              | 4022   | 51.19175 |         |



|           |  |           |          |          |
|-----------|--|-----------|----------|----------|
|           |  | sd        | 831.4193 | 4.987242 |
| 50068 G22 |  |           | 2552     | 17.712   |
| 50068 H22 |  |           | 2814     | 13.504   |
| 50068 I22 |  |           | 2795     | 15.349   |
| 50068 J22 |  |           | 3063     | 15.051   |
|           |  | mn        | 2890.667 | 14.63467 |
|           |  | sd        | 149.5471 | 0.990458 |
|           |  | 3psSD     |          | 14.96173 |
|           |  | 3ngSD     |          | 2.971373 |
|           |  | SumSD     |          | 17.9331  |
|           |  | DiffMn    |          | 36.55708 |
|           |  | SmovrDiff |          | 0.490551 |
|           |  | 1minus    |          | 0.509449 |

|           |                                   |                |      |        |
|-----------|-----------------------------------|----------------|------|--------|
| 50068 G03 | M-003290- polo-like ki            | 5347 PLK1 SMAR | 1865 | 11.153 |
| 50068 H03 | M-003290- polo-like ki            | 5347 PLK1 SMAR | 1116 | 16.577 |
| 50068 I03 | D-001206- siControl non-targeting |                | 5216 | 29.812 |
| 50068 J03 | D-001206- siControl non-targeting |                | 4799 | 21.275 |
| 50068 K03 | D-001600- (siGLO RISC-free siRNA  |                | 7825 | 31.642 |
| 50068 L03 | D-001600- (siGLO RISC-free siRNA  |                | 7160 | 27.486 |



| rZ              | cell ct     | % inf         | AD            | rZ              | cell ct     | % inf         | AD            | rZ             |
|-----------------|-------------|---------------|---------------|-----------------|-------------|---------------|---------------|----------------|
| -1.10713        | 2791        | 9.4231        | 11.7269       | -1.53251        | 2379        | 10.593        | 5.057         | -0.72597       |
| -0.09194        | 3588        | 15.608        | 5.542         | -0.72404        | 3333        | 15.332        | 0.318         | -0.04498       |
| 0.480406        | 4267        | 29.201        | 8.051         | 1.052794        | 2773        | 22.07         | 6.42          | 0.92327        |
| -0.96349        | 2291        | 16.019        | 5.131         | -0.67032        | 2044        | 12.867        | 2.783         | -0.3992        |
| -0.99871        | 3721        | 13.41         | 7.74          | -1.01136        | 2622        | 11.67         | 3.98          | -0.57121       |
| 1.14719         | 1659        | 28.149        | 6.999         | 0.91528         | 1206        | 18.905        | 3.255         | 0.468461       |
| 1.343323        | 3373        | 27.127        | 5.977         | 0.781687        | 2216        | 20.758        | 5.108         | 0.734736       |
| 0.031336        | 3763        | 31.331        | 10.181        | 1.331221        | 2095        | 15.179        | 0.471         | -0.06696       |
| -1.0455         | 3540        | 17.768        | 3.382         | -0.44169        | 2514        | 11.814        | 3.836         | -0.55051       |
| -0.97126        | 2564        | 17.551        | 3.599         | -0.47006        | 1307        | 5.7383        | 9.9117        | -1.42359       |
| -1.54969        | 2675        | 10.579        | 10.571        | -1.38142        | 2108        | 7.0209        | 8.6291        | -1.23928       |
| 0.299984        | 2845        | 22.988        | 1.838         | 0.24065         | 1367        | 17.922        | 2.272         | 0.327204       |
| <b>2.435868</b> | <b>1727</b> | <b>37.695</b> | <b>16.545</b> | <b>2.163103</b> | <b>1740</b> | <b>32.644</b> | <b>16.994</b> | <b>2.44275</b> |
| 0.061896        | 1666        | 22.689        | 1.539         | 0.201565        | 1047        | 15.855        | 0.205         | 0.030177       |
| 0.154438        | 1770        | 16.949        | 4.201         | -0.54875        | 2396        | 15.359        | 0.291         | -0.0411        |
| -1.0714         | 3170        | 19.842        | 1.308         | -0.17059        | 1854        | 18.608        | 2.958         | 0.425782       |
| -0.7822         | 2363        | 8.7177        | 12.4323       | -1.62472        | 2364        | 18.486        | 2.836         | 0.408251       |
| 1.493876        | 4622        | 31.415        | 10.265        | 1.342201        | 3145        | 30.525        | 14.875        | 2.138251       |
| -1.43609        | 2279        | 16.323        | 4.827         | -0.63058        | 1746        | 7.1019        | 8.5481        | -1.22764       |
| -0.34815        | 1765        | 21.643        | 0.493         | 0.064836        | 1217        | 14.462        | 1.188         | -0.17          |
| -2.09137        | 3527        | 7.4001        | 13.7499       | -1.79695        | 1645        | 4.2553        | 11.3947       | -1.6367        |
| -0.47384        | 3363        | 11.329        | 9.821         | -1.28338        | 2592        | 7.4074        | 8.2426        | -1.18374       |
| -1.52388        | 4825        | 18.487        | 2.663         | -0.34771        | 2953        | 5.4182        | 10.2318       | -1.46959       |
| -0.50026        | 5042        | 26.874        | 5.724         | 0.748616        | 2979        | 13.159        | 2.491         | -0.35724       |
| -1.10782        | 4792        | 11.415        | 9.735         | -1.27214        | 3492        | 5.7847        | 9.8653        | -1.41692       |
| -1.53801        | 4808        | 14.372        | 6.778         | -0.88561        | 3003        | 4.0626        | 11.5874       | -1.66439       |
| -1.20658        | 4040        | 10.842        | 10.308        | -1.34704        | 2426        | 4.5342        | 11.1158       | -1.59662       |
| 0.192421        | 5143        | 19.561        | 1.589         | -0.20732        | 2509        | 15.823        | 0.173         | 0.025579       |
| -1.62442        | 5559        | 11.333        | 9.817         | -1.28286        | 2440        | 8.5246        | 7.1254        | -1.0232        |
| -1.50201        | 4038        | 17.112        | 4.038         | -0.52744        | 1604        | 4.6135        | 11.0365       | -1.58522       |
| -0.76822        | 3294        | 18.124        | 3.026         | -0.39516        | 2705        | 9.0943        | 6.5557        | -0.94133       |
| -1.76049        | 5272        | 8.5357        | 12.6143       | -1.64851        | 2645        | 9.3006        | 6.3494        | -0.91169       |
| -1.75767        | 4768        | 12.605        | 8.545         | -1.11658        | 1998        | 4.8549        | 10.7951       | -1.55053       |
| -0.15202        | 5602        | 19.797        | 1.353         | -0.17647        | 2434        | 8.8332        | 6.8168        | -0.97885       |
| 1.335554        | 3855        | 31.518        | 10.368        | 1.355665        | 2254        | 15.484        | 0.166         | -0.02314       |
| -0.75993        | 4965        | 11.098        | 10.052        | -1.31357        | 3458        | 12.637        | 3.013         | -0.43225       |
| -0.50199        | 3751        | 18.022        | 3.128         | -0.40849        | 3150        | 13.397        | 2.253         | -0.32304       |
| -0.39373        | 4224        | 15.625        | 5.525         | -0.72182        | 2749        | 18.116        | 2.466         | 0.355082       |
| -0.46953        | 3999        | 14.229        | 6.921         | -0.9043         | 3222        | 7.2315        | 8.4185        | -1.20902       |
| -0.0322         | 3458        | 11.828        | 9.322         | -1.21815        | 2898        | 12.146        | 3.504         | -0.50281       |
| 1.308965        | 6339        | 27.386        | 6.236         | 0.815543        | 6651        | 18.478        | 2.828         | 0.407101       |
| 0.609377        | 5834        | 26.226        | 5.076         | 0.663911        | 4315        | 12.19         | 3.46          | -0.49648       |
| -0.18206        | 4411        | 7.436         | 13.714        | -1.79226        | 4185        | 7.0729        | 8.5771        | -1.23181       |
| 2.015977        | 6530        | 28.959        | 7.809         | 1.02116         | 5006        | 17.799        | 2.149         | 0.309529       |
| 0.184652        | 5413        | 15.592        | 5.558         | -0.72613        | 3826        | 7.9456        | 7.7044        | -1.1064        |
| 0.572084        | 5644        | 16.867        | 4.283         | -0.55947        | 2860        | 8.8112        | 6.8388        | -0.98201       |

|          |      |        |         |          |      |        |        |          |
|----------|------|--------|---------|----------|------|--------|--------|----------|
| 1.276334 | 4855 | 28.404 | 7.254   | 0.948613 | 3236 | 12.824 | 2.826  | -0.40538 |
| 1.823297 | 6276 | 32.33  | 11.18   | 1.461807 | 2846 | 19.079 | 3.429  | 0.493465 |
| -0.07743 | 4491 | 18.637 | 2.513   | -0.3281  | 2391 | 7.5282 | 8.1218 | -1.16638 |
| 1.023916 | 4378 | 16.766 | 4.384   | -0.57267 | 1965 | 7.5318 | 8.1182 | -1.16586 |
| -0.56518 | 2636 | 11.039 | 10.111  | -1.32129 | 2057 | 3.403  | 12.247 | -1.75917 |
| 1.072776 | 2961 | 25.16  | 4.01    | 0.524567 | 2453 | 15.369 | 0.281  | -0.03966 |
| 0.352297 | 6284 | 25.095 | 3.945   | 0.51607  | 3195 | 11.017 | 4.633  | -0.66504 |
| 1.646674 | 6242 | 26.29  | 5.14    | 0.672277 | 3368 | 18.527 | 2.877  | 0.414142 |
| 1.226783 | 5384 | 28.975 | 7.825   | 1.023252 | 2545 | 10.963 | 4.687  | -0.6728  |
| 1.480754 | 4873 | 29.633 | 8.483   | 1.109264 | 2151 | 8.8796 | 6.7704 | -0.97219 |
| -0.87941 | 3928 | 18.203 | 2.947   | -0.38483 | 1846 | 9.9133 | 5.7367 | -0.82364 |
| 1.886833 | 4892 | 35.998 | 14.848  | 1.941277 | 3321 | 21.53  | 5.88   | 0.845672 |
| 0.316558 | 6167 | 30.89  | 9.74    | 1.273575 | 4416 | 13.859 | 1.791  | -0.25665 |
| 0.252504 | 6391 | 21.468 | 0.318   | 0.04196  | 4815 | 7.3936 | 8.2564 | -1.18572 |
| -1.12923 | 4241 | 11.884 | 9.266   | -1.21083 | 3995 | 13.016 | 2.634  | -0.37779 |
| 0.228506 | 5340 | 17.397 | 3.753   | -0.49019 | 4233 | 14.836 | 0.814  | -0.11625 |
| 0.071219 | 6150 | 19.22  | 1.93    | -0.25189 | 4915 | 18.311 | 2.661  | 0.383103 |
| -0.00026 | 3972 | 24.119 | 2.969   | 0.388491 | 2532 | 16.351 | 0.701  | 0.101452 |
| 1.387695 | 5603 | 25.736 | 4.586   | 0.59986  | 3517 | 17.6   | 1.95   | 0.280933 |
| -0.77271 | 5184 | 14.969 | 6.181   | -0.80757 | 3786 | 9.6144 | 6.0356 | -0.8666  |
| 0.086067 | 5343 | 22.31  | 1.16    | 0.152024 | 3446 | 14.364 | 1.286  | -0.18408 |
| 0.613866 | 5464 | 25.055 | 3.905   | 0.510842 | 3800 | 18.237 | 2.587  | 0.372469 |
| -0.62405 | 4423 | 11.282 | 9.868   | -1.28952 | 2886 | 9.6327 | 6.0173 | -0.86397 |
| -0.19985 | 3782 | 10.656 | 10.494  | -1.37135 | 2298 | 13.446 | 2.204  | -0.316   |
| 0.000259 | 5351 | 19.697 | 1.453   | -0.18954 | 3271 | 10.364 | 5.286  | -0.75888 |
| -1.55776 | 4231 | 10.778 | 10.372  | -1.3554  | 2113 | 4.07   | 11.58  | -1.66332 |
| 0.037897 | 5263 | 28.102 | 6.952   | 0.909136 | 2903 | 28.384 | 12.734 | 1.83059  |
| -1.53676 | 5025 | 8.4179 | 12.7321 | -1.66391 | 2775 | 16.072 | 0.422  | 0.06136  |
| -0.3542  | 4612 | 18.387 | 2.763   | -0.36078 | 1871 | 12.026 | 3.624  | -0.52005 |
| -0.17826 | 6118 | 17.751 | 3.399   | -0.44391 | 4325 | 10.312 | 5.338  | -0.76635 |
| -0.08797 | 5734 | 16.097 | 5.053   | -0.66012 | 3581 | 10.276 | 5.374  | -0.77152 |
| -0.09349 | 4988 | 17.281 | 3.869   | -0.50535 | 3242 | 11.258 | 4.392  | -0.63041 |
| 0.635275 | 6158 | 16.125 | 5.025   | -0.65646 | 4235 | 9.1617 | 6.4883 | -0.93165 |
| -0.82571 | 3562 | 19.68  | 1.47    | -0.19176 | 3739 | 11.688 | 3.962  | -0.56862 |
| -0.53842 | 5532 | 15.13  | 6.02    | -0.78652 | 5768 | 15.777 | 0.127  | 0.018968 |
| -1.20762 | 5883 | 18.664 | 2.486   | -0.32457 | 3900 | 13.282 | 2.368  | -0.33956 |
| 0.327608 | 4507 | 26.026 | 4.876   | 0.637768 | 2111 | 9.0005 | 6.6495 | -0.95481 |
| -0.52599 | 5294 | 21.156 | 0.006   | 0.001176 | 4610 | 10.607 | 5.043  | -0.72396 |
| -0.79964 | 5524 | 17.361 | 3.789   | -0.49489 | 2952 | 5.7249 | 9.9251 | -1.42551 |
| -1.07606 | 4947 | 26.319 | 5.169   | 0.676068 | 2588 | 13.524 | 2.126  | -0.30479 |
| -0.0928  | 4348 | 19.457 | 1.693   | -0.22091 | 2202 | 5.8583 | 9.7917 | -1.40635 |
| 0.49698  | 5817 | 26.319 | 5.169   | 0.676068 | 3733 | 15.859 | 0.209  | 0.030752 |
| -0.36438 | 4090 | 17.726 | 3.424   | -0.44718 | 1165 | 6.0944 | 9.5556 | -1.37242 |
| -0.33762 | 4411 | 18.998 | 2.152   | -0.28091 | 2739 | 13.582 | 2.068  | -0.29645 |
| 0.140625 | 4085 | 17.674 | 3.476   | -0.45398 | 2536 | 14.826 | 0.824  | -0.11769 |
| -1.17274 | 4900 | 25.918 | 4.768   | 0.62365  | 2484 | 9.3398 | 6.3102 | -0.90605 |
| -0.05395 | 5872 | 30.381 | 9.231   | 1.20704  | 2977 | 12.832 | 2.818  | -0.40423 |

|          |      |        |         |          |      |        |        |          |
|----------|------|--------|---------|----------|------|--------|--------|----------|
| 0.372153 | 5653 | 26.181 | 5.031   | 0.658029 | 3545 | 14.104 | 1.546  | -0.22144 |
| -1.80134 | 6017 | 12.116 | 9.034   | -1.1805  | 3624 | 6.181  | 9.469  | -1.35997 |
| 0.730234 | 7247 | 42.873 | 21.723  | 2.839955 | 3884 | 21.421 | 5.771  | 0.830009 |
| -0.39235 | 5022 | 30.307 | 9.157   | 1.197367 | 2485 | 11.469 | 4.181  | -0.60009 |
| -0.31449 | 5008 | 15.495 | 5.655   | -0.73881 | 3168 | 7.3232 | 8.3268 | -1.19584 |
| -0.9388  | 4653 | 11.799 | 9.351   | -1.22194 | 3166 | 9.3809 | 6.2691 | -0.90015 |
| -0.52719 | 5225 | 18.316 | 2.834   | -0.37006 | 4993 | 11.937 | 3.713  | -0.53284 |
| -0.03669 | 6112 | 14.545 | 6.605   | -0.86299 | 5269 | 14.557 | 1.093  | -0.15635 |
| -0.61887 | 3649 | 8.4681 | 12.6819 | -1.65735 | 3555 | 10.352 | 5.298  | -0.7606  |
| -0.8176  | 5593 | 16.109 | 5.041   | -0.65855 | 3895 | 12.632 | 3.018  | -0.43297 |
| -0.53324 | 3879 | 15.88  | 5.27    | -0.68849 | 3762 | 19.298 | 3.648  | 0.524935 |
| -1.10696 | 4795 | 11.366 | 9.784   | -1.27854 | 3434 | 10.513 | 5.137  | -0.73747 |
| -1.74963 | 4267 | 7.9681 | 13.1819 | -1.72271 | 2749 | 33.212 | 17.562 | 2.524371 |
| -1.30154 | 5666 | 14.137 | 7.013   | -0.91633 | 2659 | 12.335 | 3.315  | -0.47565 |
| 0.118181 | 5120 | 21.133 | 0.017   | -0.00183 | 3450 | 24.232 | 8.582  | 1.233949 |
| 0.123188 | 4462 | 15.374 | 5.776   | -0.75463 | 3210 | 21.433 | 5.783  | 0.831733 |
| -0.80378 | 3768 | 20.435 | 0.715   | -0.09307 | 2619 | 16.571 | 0.921  | 0.133066 |
| -0.62958 | 4712 | 26.273 | 5.123   | 0.670055 | 3005 | 19.834 | 4.184  | 0.601958 |
| -1.28289 | 4472 | 14.781 | 6.369   | -0.83214 | 2762 | 12.925 | 2.725  | -0.39086 |
| -0.69139 | 5180 | 16.004 | 5.146   | -0.67228 | 2856 | 15.966 | 0.316  | 0.046128 |
| -0.01252 | 5509 | 32.656 | 11.506  | 1.504421 | 2415 | 28.033 | 12.383 | 1.780151 |
| 0.428783 | 5325 | 31.174 | 10.024  | 1.310698 | 2203 | 27.463 | 11.813 | 1.698242 |
| -0.0303  | 5756 | 37.144 | 15.994  | 2.091078 | 3659 | 23.23  | 7.58   | 1.089962 |
| -1.00544 | 6548 | 34.407 | 13.257  | 1.733306 | 3933 | 26.112 | 10.462 | 1.504104 |
| -0.35817 | 5030 | 24.453 | 3.303   | 0.43215  | 4220 | 22.18  | 6.53   | 0.939077 |
| -0.6774  | 4780 | 18.912 | 2.238   | -0.29215 | 3488 | 13.819 | 1.831  | -0.2624  |
| -1.32381 | 4334 | 18.182 | 2.968   | -0.38758 | 2769 | 14.879 | 0.771  | -0.11007 |
| -1.53618 | 1799 | 15.231 | 5.919   | -0.77332 | 1737 | 13.644 | 2.006  | -0.28754 |
| -1.14046 | 4994 | 24.549 | 3.399   | 0.444699 | 4406 | 18.112 | 2.462  | 0.354507 |
| -1.04515 | 4222 | 16.888 | 4.262   | -0.55672 | 2931 | 10.577 | 5.073  | -0.72827 |
| -0.27253 | 3996 | 22.973 | 1.823   | 0.238689 | 3901 | 17.355 | 1.705  | 0.245726 |
| 0.53341  | 5003 | 26.484 | 5.334   | 0.697636 | 4246 | 24.235 | 8.585  | 1.23438  |
| -0.78393 | 5537 | 15.008 | 6.142   | -0.80247 | 4281 | 9.5538 | 6.0962 | -0.8753  |
| 0.989213 | 5254 | 28.512 | 7.362   | 0.96273  | 4425 | 28.362 | 12.712 | 1.827428 |
| -0.85472 | 4324 | 20.999 | 0.151   | -0.01935 | 3796 | 10.933 | 4.717  | -0.67711 |
| -0.83745 | 4415 | 17.939 | 3.211   | -0.41934 | 3124 | 17.19  | 1.54   | 0.222016 |
| 1.887696 | 3594 | 32.053 | 10.903  | 1.425599 | 2365 | 19.746 | 4.096  | 0.589312 |
| 3.15721  | 3851 | 30.771 | 9.621   | 1.258019 | 4002 | 42.829 | 27.179 | 3.906331 |
| 4.258734 | 3855 | 42.516 | 21.366  | 2.79329  | 3516 | 39.59  | 23.94  | 3.440888 |
| 3.98577  | 3580 | 36.089 | 14.939  | 1.953172 | 2757 | 29.924 | 14.274 | 2.051887 |
| 0.084859 | 4637 | 13.155 | 7.995   | -1.04469 | 2701 | 12.255 | 3.395  | -0.48714 |
| 0.471946 | 4863 | 12.832 | 8.318   | -1.08691 | 3175 | 9.1339 | 6.5161 | -0.93564 |
| -0.46987 | 2794 | 12.527 | 8.623   | -1.12678 | 1763 | 12.762 | 2.888  | -0.41429 |
| 1.572606 | 5911 | 24.784 | 3.634   | 0.475417 | 4577 | 25.497 | 9.847  | 1.415729 |
| 1.977994 | 5433 | 27.259 | 6.109   | 0.798942 | 4652 | 25.494 | 9.844  | 1.415298 |
| 1.285484 | 5787 | 21.773 | 0.623   | 0.081829 | 4765 | 13.473 | 2.177  | -0.31212 |
| 2.430516 | 5355 | 23.66  | 2.51    | 0.328492 | 5021 | 18.642 | 2.992  | 0.430668 |

|                 |             |               |               |                 |             |               |               |                 |
|-----------------|-------------|---------------|---------------|-----------------|-------------|---------------|---------------|-----------------|
| 2.251475        | 4353        | 26.487        | 5.337         | 0.698028        | 4108        | 23.856        | 8.206         | 1.179918        |
| 0.874399        | 5282        | 19.084        | 2.066         | -0.26967        | 4139        | 11.863        | 3.787         | -0.54347        |
| -1.27029        | 4450        | 11.82         | 9.33          | -1.2192         | 3412        | 6.5651        | 9.0849        | -1.30478        |
| 0.83866         | 5690        | 21.933        | 0.783         | 0.102743        | 3386        | 12.552        | 3.098         | -0.44446        |
| 0.889937        | 4608        | 26.085        | 4.935         | 0.64548         | 3376        | 19.668        | 4.018         | 0.578104        |
| <b>3.910839</b> | <b>4915</b> | <b>37.396</b> | <b>16.246</b> | <b>2.124019</b> | <b>2936</b> | <b>21.969</b> | <b>6.319</b>  | <b>0.908756</b> |
| 1.773573        | 4658        | 32.675        | 11.525        | 1.506904        | 3399        | 18.123        | 2.473         | 0.356088        |
| -0.17654        | 4802        | 22.074        | 0.924         | 0.121175        | 2922        | 12.628        | 3.022         | -0.43354        |
| 0.02633         | 3700        | 28.892        | 7.742         | 1.012402        | 2866        | 13.608        | 2.042         | -0.29272        |
| -1.10265        | 2425        | 9.6907        | 11.4593       | -1.49753        | 1966        | 13.123        | 2.527         | -0.36241        |
| 0.489211        | 3509        | 21.317        | 0.167         | 0.022222        | 2575        | 14.019        | 1.631         | -0.23366        |
| 0.254576        | 3273        | 16.926        | 4.224         | -0.55176        | 2552        | 17.751        | 2.101         | 0.302631        |
| -0.66497        | 4903        | 18.621        | 2.529         | -0.33019        | 2750        | 6.7636        | 8.8864        | -1.27625        |
| 0.800503        | 4537        | 20.013        | 1.137         | -0.14823        | 4381        | 23.944        | 8.294         | 1.192563        |
| <b>3.774616</b> | <b>4028</b> | <b>36.346</b> | <b>15.196</b> | <b>1.986766</b> | <b>3344</b> | <b>34.898</b> | <b>19.248</b> | <b>2.766649</b> |
| 0.453817        | 4202        | 22.323        | 1.173         | 0.153723        | 3445        | 16.633        | 0.983         | 0.141975        |
| 0.269252        | 4266        | 24.191        | 3.041         | 0.397902        | 3209        | 16.204        | 0.554         | 0.080328        |
| 0.238519        | 3352        | 19.391        | 1.759         | -0.22954        | 3286        | 16.677        | 1.027         | 0.148298        |
| 2.90462         | 6422        | 35.939        | 14.789        | 1.933564        | 5075        | 27.764        | 12.114        | 1.741496        |
| -1.03807        | 4278        | 21.996        | 0.846         | 0.110979        | 3550        | 10.366        | 5.284         | -0.75859        |
| -0.59505        | 4135        | 8.2709        | 12.8791       | -1.68312        | 5032        | 11.208        | 4.442         | -0.6376         |
| 1.150988        | 4168        | 11.132        | 10.018        | -1.30913        | 4215        | 12.052        | 3.598         | -0.51631        |
| 0.455889        | 5090        | 23.438        | 2.288         | 0.299472        | 4341        | 21.308        | 5.658         | 0.813771        |
| 0.851609        | 2949        | 18.481        | 2.669         | -0.34849        | 2820        | 16.064        | 0.414         | 0.06021         |
| 2.788079        | 3636        | 33.196        | 12.046        | 1.575008        | 2990        | 24.615        | 8.965         | 1.288986        |
| 0.633721        | 4110        | 15.669        | 5.481         | -0.71607        | 4112        | 15.856        | 0.206         | 0.030321        |
| -0.33745        | 2277        | 11.638        | 9.512         | -1.24299        | 2560        | 12.031        | 3.619         | -0.51933        |
| 0.1149          | 3371        | 11.718        | 9.432         | -1.23253        | 3459        | 11.593        | 4.057         | -0.58227        |
| 1.684312        | 3810        | 20.709        | 0.441         | -0.05725        | 3257        | 16.181        | 0.531         | 0.077023        |
| 1.628372        | 4317        | 20.778        | 0.372         | -0.04823        | 3080        | 10.325        | 5.325         | -0.76448        |
| 1.565527        | 4024        | 25.298        | 4.148         | 0.542606        | 3046        | 14.741        | 0.909         | -0.1299         |
| -0.19069        | 3572        | 17.777        | 3.373         | -0.44052        | 2521        | 11.027        | 4.623         | -0.6636         |
| 2.654274        | 4346        | 23.608        | 2.458         | 0.321694        | 4337        | 18.285        | 2.635         | 0.379367        |
| <b>2.67292</b>  | <b>4615</b> | <b>37.27</b>  | <b>16.12</b>  | <b>2.107549</b> | <b>4042</b> | <b>25.383</b> | <b>9.733</b>  | <b>1.399347</b> |
| -0.41842        | 3868        | 10.367        | 10.783        | -1.40913        | 4619        | 13.877        | 1.773         | -0.25406        |
| 0.513728        | 3646        | 20.269        | 0.881         | -0.11477        | 3324        | 11.221        | 4.429         | -0.63573        |
| 3.399097        | 5339        | 35.4          | 14.25         | 1.863108        | 5363        | 24.688        | 9.038         | 1.299476        |
| <b>3.209179</b> | <b>3837</b> | <b>41.621</b> | <b>20.471</b> | <b>2.676298</b> | <b>3320</b> | <b>33.404</b> | <b>17.754</b> | <b>2.551962</b> |
| 0.34073         | 5886        | 20.557        | 0.593         | -0.07712        | 5575        | 16.52         | 0.87          | 0.125737        |
| 1.209172        | 5662        | 31.349        | 10.199        | 1.333574        | 4611        | 13.121        | 2.529         | -0.3627         |
| 0.001813        | 5596        | 16.994        | 4.156         | -0.54287        | 5994        | 12.045        | 3.605         | -0.51732        |
| 1.082618        | 5297        | 20.313        | 0.837         | -0.10902        | 5152        | 20.613        | 4.963         | 0.7139          |
| -0.88769        | 4889        | 10.697        | 10.453        | -1.36599        | 5850        | 7.7607        | 7.8893        | -1.13297        |
| 0.667906        | 5043        | 21.138        | 0.012         | -0.00118        | 5633        | 12.604        | 3.046         | -0.43699        |
| 0.025121        | 3817        | 15.562        | 5.588         | -0.73005        | 4029        | 15.115        | 0.535         | -0.07616        |
| 0.645461        | 2914        | 18.257        | 2.893         | -0.37777        | 4154        | 14.54         | 1.11          | -0.15879        |
| 2.233519        | 5002        | 31.847        | 10.697        | 1.398671        | 5236        | 25.497        | 9.847         | 1.415729        |

|          |      |        |        |          |      |        |        |          |
|----------|------|--------|--------|----------|------|--------|--------|----------|
| 0.071737 | 5111 | 22.031 | 0.881  | 0.115554 | 4085 | 12.95  | 2.7    | -0.38727 |
| -0.03686 | 3865 | 28.176 | 7.026  | 0.918809 | 4230 | 15.626 | 0.024  | -0.00273 |
| 1.506652 | 4261 | 27.224 | 6.074  | 0.794367 | 3009 | 17.381 | 1.731  | 0.249463 |
| 0.426365 | 2687 | 14.738 | 6.412  | -0.83776 | 3010 | 15.814 | 0.164  | 0.024285 |
| 0.658583 | 3949 | 20.815 | 0.335  | -0.0434  | 3089 | 16.057 | 0.407  | 0.059204 |
| -0.17826 | 3637 | 21.941 | 0.791  | 0.103789 | 2768 | 8.9234 | 6.7266 | -0.96589 |
| 0.577782 | 4970 | 26.439 | 5.289  | 0.691754 | 4438 | 13.384 | 2.266  | -0.3249  |
| 0.086585 | 2677 | 17.706 | 3.444  | -0.4498  | 2216 | 9.6119 | 6.0381 | -0.86695 |
| 0.901333 | 5440 | 25.018 | 3.868  | 0.506005 | 4283 | 15.293 | 0.357  | -0.05058 |
| 1.625955 | 5512 | 34.888 | 13.738 | 1.796181 | 4306 | 17.812 | 2.162  | 0.311397 |
| 0.150294 | 4756 | 21.573 | 0.423  | 0.055685 | 4638 | 13.583 | 2.067  | -0.29631 |
| -0.21987 | 5033 | 19.571 | 1.579  | -0.20601 | 4688 | 17.129 | 1.479  | 0.21325  |
| 0.151848 | 4570 | 21.532 | 0.382  | 0.050326 | 4677 | 14.304 | 1.346  | -0.1927  |
| -1.06449 | 5971 | 13.7   | 7.45   | -0.97345 | 5365 | 15.676 | 0.026  | 0.004455 |
| -0.90358 | 5541 | 23.678 | 2.528  | 0.330844 | 4807 | 15.061 | 0.589  | -0.08392 |
| -0.64719 | 4583 | 11.804 | 9.346  | -1.22129 | 4485 | 13.579 | 2.071  | -0.29688 |
| 0.634584 | 5620 | 23.185 | 2.035  | 0.266401 | 5402 | 21.177 | 5.527  | 0.794946 |
| -0.00993 | 4334 | 23.719 | 2.569  | 0.336204 | 4991 | 26.107 | 10.457 | 1.503386 |
| 0.505958 | 4374 | 22.908 | 1.758  | 0.230192 | 4197 | 29.14  | 13.49  | 1.939227 |
| -0.01148 | 3081 | 20.513 | 0.637  | -0.08287 | 4133 | 23.179 | 7.529  | 1.082633 |
| 0.394425 | 4034 | 17.179 | 3.971  | -0.51868 | 3422 | 14.319 | 1.331  | -0.19055 |
| -0.06828 | 3676 | 14.771 | 6.379  | -0.83345 | 2892 | 12.31  | 3.34   | -0.47924 |
| 0.175156 | 3347 | 13.027 | 8.123  | -1.06142 | 3291 | 18.961 | 3.311  | 0.476508 |
| 0.864558 | 4308 | 21.936 | 0.786  | 0.103136 | 4160 | 20.793 | 5.143  | 0.739766 |
| 0.512692 | 4145 | 23.498 | 2.348  | 0.307315 | 3826 | 25.536 | 9.886  | 1.421333 |
| -0.18293 | 5044 | 14.433 | 6.717  | -0.87763 | 4380 | 13.516 | 2.134  | -0.30594 |
| 2.343672 | 4713 | 24.592 | 3.442  | 0.45032  | 4900 | 24.306 | 8.656  | 1.244583 |
| 0.750434 | 4400 | 23.409 | 2.259  | 0.295682 | 4066 | 29.267 | 13.617 | 1.957476 |
| -0.0139  | 5983 | 18.185 | 2.965  | -0.38718 | 4662 | 20.957 | 5.307  | 0.763332 |
| 0.103678 | 5694 | 25.501 | 4.351  | 0.569141 | 4227 | 22.167 | 6.517  | 0.937209 |
| 0.073636 | 5700 | 25.386 | 4.236  | 0.554109 | 6010 | 30.083 | 14.433 | 2.074735 |
| -0.315   | 6683 | 31.767 | 10.617 | 1.388214 | 5476 | 27.52  | 11.87  | 1.706433 |
| -0.1869  | 6627 | 25.502 | 4.352  | 0.569272 | 5693 | 33.462 | 17.812 | 2.560296 |
| 0.994738 | 5287 | 16.89  | 4.26   | -0.55646 | 3741 | 15.664 | 0.014  | 0.00273  |
| -0.06967 | 5006 | 31.662 | 10.512 | 1.374488 | 4331 | 15.008 | 0.642  | -0.09154 |
| 0.285654 | 5387 | 26.62  | 5.47   | 0.715414 | 5328 | 23.236 | 7.586  | 1.090824 |
| 0.90185  | 7586 | 39.388 | 18.238 | 2.384407 | 5672 | 23.431 | 7.781  | 1.118845 |
| -0.18379 | 5736 | 29.027 | 7.877  | 1.030049 | 5507 | 17.941 | 2.291  | 0.329934 |
| -0.70917 | 4075 | 21.89  | 0.74   | 0.097123 | 4104 | 19.274 | 3.624  | 0.521486 |
| 0.639073 | 5768 | 26.907 | 5.757  | 0.752929 | 6100 | 26.18  | 10.53  | 1.513876 |
| 0.877852 | 4429 | 30.413 | 9.263  | 1.211223 | 4176 | 20.761 | 5.111  | 0.735167 |
| 0.290833 | 3694 | 28.018 | 6.868  | 0.898156 | 3037 | 26.605 | 10.955 | 1.574948 |
| 0.250432 | 3193 | 32.289 | 11.139 | 1.456448 | 2346 | 22.762 | 7.112  | 1.02271  |
| -1.23127 | 3507 | 17.308 | 3.842  | -0.50182 | 3127 | 13.751 | 1.899  | -0.27217 |
| -0.97402 | 4842 | 25.671 | 4.521  | 0.591363 | 3334 | 18.836 | 3.186  | 0.458546 |
| -1.34419 | 3519 | 18.272 | 2.878  | -0.37581 | 3403 | 9.4916 | 6.1584 | -0.88424 |
| 0.564487 | 4186 | 26.015 | 4.865  | 0.63633  | 2899 | 19.041 | 3.391  | 0.488004 |

|          |      |        |        |          |      |        |        |          |
|----------|------|--------|--------|----------|------|--------|--------|----------|
| 0.336413 | 4885 | 23.378 | 2.228  | 0.291629 | 4265 | 13.669 | 1.981  | -0.28395 |
| 3.139427 | 5311 | 38.223 | 17.073 | 2.232122 | 5480 | 25.42  | 9.77   | 1.404664 |
| 2.243706 | 5907 | 46.927 | 25.777 | 3.369882 | 4609 | 28.358 | 12.708 | 1.826853 |
| 0.14805  | 4794 | 20.588 | 0.562  | -0.07307 | 4799 | 20.525 | 4.875  | 0.701254 |
| 1.839008 | 4761 | 39.719 | 18.569 | 2.427674 | 3973 | 31.311 | 15.661 | 2.251198 |
| -0.28237 | 5820 | 28.557 | 7.407  | 0.968612 | 4099 | 22.835 | 7.185  | 1.0332   |
| 0.784965 | 6747 | 16.318 | 4.832  | -0.63123 | 5480 | 20.693 | 5.043  | 0.725396 |
| 1.084172 | 5872 | 13.692 | 7.458  | -0.97449 | 5662 | 18.792 | 3.142  | 0.452223 |
| 1.548952 | 4669 | 26.023 | 4.873  | 0.637376 | 5517 | 26.518 | 10.868 | 1.562446 |
| 0.186206 | 5382 | 14.363 | 6.787  | -0.88678 | 6505 | 22.183 | 6.533  | 0.939508 |
| 1.651335 | 5322 | 28.504 | 7.354  | 0.961684 | 6759 | 28.037 | 12.387 | 1.780726 |
| 1.952268 | 3651 | 28.129 | 6.979  | 0.912665 | 4032 | 21.131 | 5.481  | 0.788336 |
| 0.812762 | 4372 | 23.102 | 1.952  | 0.255552 | 7181 | 23.2   | 7.55   | 1.085651 |
| 0.836415 | 4267 | 26.107 | 4.957  | 0.648356 | 5070 | 17.692 | 2.042  | 0.294153 |
| 1.351956 | 3387 | 25.391 | 4.241  | 0.554763 | 3940 | 26.218 | 10.568 | 1.519336 |
| -0.21487 | 3622 | 17.145 | 4.005  | -0.52313 | 4424 | 11.641 | 4.009  | -0.57537 |
| 2.721608 | 4984 | 35.152 | 14.002 | 1.83069  | 3936 | 34.223 | 18.573 | 2.669652 |
| -0.35351 | 3659 | 12.189 | 8.961  | -1.17096 | 5332 | 21.099 | 5.449  | 0.783738 |
| -0.35903 | 4804 | 24.063 | 2.913  | 0.38117  | 5815 | 22.442 | 6.792  | 0.976726 |
| 1.69398  | 5334 | 36.314 | 15.164 | 1.982583 | 5581 | 34.653 | 19.003 | 2.731443 |
| 2.043774 | 4213 | 37.171 | 16.021 | 2.094608 | 3842 | 25.95  | 10.3   | 1.480825 |
| 0.750089 | 4601 | 27.255 | 6.105  | 0.798419 | 5853 | 29.421 | 13.771 | 1.979606 |
| -0.3005  | 5599 | 24.683 | 3.533  | 0.462215 | 5900 | 20.898 | 5.248  | 0.754854 |
| 1.147362 | 6557 | 22.236 | 1.086  | 0.142351 | 5351 | 18.875 | 3.225  | 0.46415  |
| -0.09919 | 4505 | 22.486 | 1.336  | 0.17503  | 4732 | 27.663 | 12.013 | 1.726982 |
| 1.991115 | 5500 | 47.891 | 26.741 | 3.495893 | 3341 | 36.636 | 20.986 | 3.016399 |
| -1.60848 | 2689 | 13.871 | 7.279  | -0.9511  | 2747 | 11.722 | 3.928  | -0.56373 |
| -0.04256 | 4102 | 23.745 | 2.595  | 0.339603 | 4036 | 20.738 | 5.088  | 0.731862 |
| -1.2803  | 3906 | 15.643 | 5.507  | -0.71947 | 3679 | 15.901 | 0.251  | 0.036787 |
| 0.909102 | 3838 | 24.831 | 3.681  | 0.481561 | 4271 | 25.661 | 10.011 | 1.439296 |
| -0.62025 | 4091 | 18.04  | 3.11   | -0.40614 | 5185 | 16.066 | 0.416  | 0.060498 |
| -0.40375 | 2918 | 15.113 | 6.037  | -0.78875 | 4208 | 18.227 | 2.577  | 0.371032 |
| -1.25907 | 2843 | 15.406 | 5.744  | -0.75045 | 3142 | 7.9885 | 7.6615 | -1.10024 |
| -0.33728 | 2857 | 16.556 | 4.594  | -0.60012 | 3466 | 21.091 | 5.441  | 0.782588 |
| -0.74387 | 2741 | 25.392 | 4.242  | 0.554893 | 3291 | 22.03  | 6.38   | 0.917522 |
| -0.68206 | 3324 | 24.699 | 3.549  | 0.464306 | 2832 | 16.102 | 0.452  | 0.065671 |
| 0.619218 | 2974 | 18.931 | 2.219  | -0.28967 | 2599 | 20.777 | 5.127  | 0.737467 |
| 0.388555 | 2922 | 24.333 | 3.183  | 0.416464 | 3845 | 26.606 | 10.956 | 1.575092 |
| -0.76597 | 2886 | 12.301 | 8.849  | -1.15632 | 3753 | 14.762 | 0.888  | -0.12689 |
| -0.35178 | 3576 | 19.855 | 1.295  | -0.16889 | 4808 | 12.646 | 3.004  | -0.43096 |
| -0.55655 | 3177 | 17.343 | 3.807  | -0.49725 | 4255 | 15.182 | 0.468  | -0.06653 |
| 0.152884 | 4547 | 25.005 | 3.855  | 0.504306 | 5862 | 20.914 | 5.264  | 0.757153 |
| -0.92913 | 3501 | 23.308 | 2.158  | 0.282479 | 4330 | 17.136 | 1.486  | 0.214256 |
| -0.25699 | 4434 | 29.883 | 8.733  | 1.141943 | 5474 | 23.073 | 7.423  | 1.067401 |
| -1.28514 | 5858 | 20.314 | 0.836  | -0.10889 | 5484 | 11.834 | 3.816  | -0.54764 |
| -0.28393 | 4956 | 20.682 | 0.468  | -0.06078 | 3543 | 8.3545 | 7.2955 | -1.04764 |
| 0.251296 | 6019 | 26.499 | 5.349  | 0.699597 | 5130 | 16.043 | 0.393  | 0.057192 |

|          |          |        |         |          |        |        |         |          |
|----------|----------|--------|---------|----------|--------|--------|---------|----------|
| 0.3466   | 3888     | 23.148 | 1.998   | 0.261565 | 3876   | 18.395 | 2.745   | 0.395174 |
| 2.50821  | 5286     | 41.6   | 20.45   | 2.673553 | 5620   | 36.335 | 20.685  | 2.973145 |
| -0.685   | 4319     | 19.31  | 1.84    | -0.24013 | 5223   | 14.742 | 0.908   | -0.12976 |
| -0.27409 | 4004     | 24.351 | 3.201   | 0.418817 | 5683   | 19.338 | 3.688   | 0.530683 |
| -0.08434 | 6002     | 25.392 | 4.242   | 0.554893 | 6755   | 23.849 | 8.199   | 1.178912 |
| 0.363693 | 3957     | 27.496 | 6.346   | 0.829922 | 5403   | 22.932 | 7.282   | 1.047139 |
| 2.01097  | 4039     | 36.692 | 15.542  | 2.031994 | 5107   | 31.095 | 15.445  | 2.220159 |
| -0.96418 | 4608     | 13.607 | 7.543   | -0.98561 | 3873   | 15.931 | 0.281   | 0.041098 |
| -1.12405 | 4543     | 21.352 | 0.202   | 0.026797 | 3267   | 10.162 | 5.488   | -0.78791 |
| 0.02115  | 3512     | 23.121 | 1.971   | 0.258035 | 4438   | 23.051 | 7.401   | 1.064239 |
| 1.451921 | 4764     | 28.401 | 7.251   | 0.94822  | 5838   | 26.122 | 10.472  | 1.505541 |
| -0.41929 | 2462     | 15.881 | 5.269   | -0.68836 | 3848   | 17.646 | 1.996   | 0.287543 |
| 0.445012 | 2635     | 11.917 | 9.233   | -1.20652 | 4448   | 12.028 | 3.622   | -0.51976 |
| -0.2121  | 2951     | 7.5568 | 13.5932 | -1.77647 | 3893   | 10.917 | 4.733   | -0.67941 |
| 0.967458 | 5095     | 28.479 | 7.329   | 0.958416 | 5661   | 22.24  | 6.59    | 0.947699 |
| 0.729889 | 6265     | 34.222 | 13.072  | 1.709124 | 6139   | 28.914 | 13.264  | 1.90675  |
| 0.889937 | 5220     | 16.82  | 4.33    | -0.56561 | 5571   | 16.765 | 1.115   | 0.160944 |
| 1.931378 | 5836     | 24.829 | 3.679   | 0.4813   | 6523   | 28.821 | 13.171  | 1.893386 |
| -1.30897 | 2778     | 9.1073 | 12.0427 | -1.57379 | 2496   | 8.8942 | 6.7558  | -0.97009 |
| -0.42429 | 4089     | 21.668 | 0.518   | 0.068104 | 3399   | 11.68  | 3.97    | -0.56977 |
| -0.39857 | 2677     | 15.951 | 5.199   | -0.67921 | 1982   | 9.7376 | 5.9124  | -0.84889 |
| 1.382342 | 3141     | 21.426 | 0.276   | 0.03647  | 3465   | 14.949 | 0.701   | -0.10001 |
| -1.9103  | 2487     | 25.613 | 4.463   | 0.583782 | 2569   | 8.4469 | 7.2031  | -1.03436 |
| 0.561207 | 3531     | 32.767 | 11.617  | 1.51893  | 4676   | 17.151 | 1.501   | 0.216412 |
| 0.394597 | 1781     | 30.657 | 9.507   | 1.243118 | 2454   | 17.441 | 1.791   | 0.258085 |
| -1.3577  | 2920     | 18.288 | 2.862   | -0.37372 | 4198   | 14.293 | 1.357   | -0.19428 |
| -0.37163 | 2929     | 22.636 | 1.486   | 0.194637 | 4090   | 13.056 | 2.594   | -0.37204 |
| -0.22384 | 3258     | 23.91  | 2.76    | 0.361171 | 3762   | 8.6922 | 6.9578  | -0.99911 |
| -0.65772 | 2202     | 17.666 | 3.484   | -0.45503 | 2386   | 14.669 | 0.981   | -0.14025 |
| -0.64805 | 1633     | 15.309 | 5.841   | -0.76313 | 2377   | 7.825  | 7.825   | -1.12373 |
| -0.35886 | 2689     | 22.797 | 1.647   | 0.215683 | 4270   | 15.691 | 0.041   | 0.00661  |
| -0.12043 | 2506     | 31.524 | 10.374  | 1.356449 | 4103   | 18.157 | 2.507   | 0.360973 |
| -0.83141 | 2234     | 15.712 | 5.438   | -0.71045 | 4299   | 17.283 | 1.633   | 0.23538  |
| -0.6755  | 2743     | 13.38  | 7.77    | -1.01528 | 3406   | 9.7181 | 5.9319  | -0.85169 |
| 0.197428 | 2175     | 10.529 | 10.621  | -1.38795 | 4172   | 12.224 | 3.426   | -0.4916  |
| -1.22661 | 1717     | 11.415 | 9.735   | -1.27214 | 2578   | 7.8743 | 7.7757  | -1.11665 |
| -1.23334 | 2861     | 15.904 | 5.246   | -0.68535 | 4293   | 9.4107 | 6.2393  | -0.89587 |
| -1.80199 | 2421     | 13.383 | 7.767   | -1.01489 | 2333   | 11.316 | 4.334   | -0.62208 |
| -1.84222 | 2727     | 14.925 | 6.225   | -0.81332 | 1810   | 5.3591 | 10.2909 | -1.47808 |
|          | 4426     | 21.147 | 5.169   |          | 3552.5 | 15.645 | 4.702   |          |
|          |          |        | 15.507  |          |        |        | 14.106  |          |
|          |          |        | 7.65012 |          |        |        | 6.95896 |          |
| 4857     | 67.49    |        | 5197    | 52.492   |        |        |         |          |
| 6058     | 60.961   |        | 6295    | 54.678   |        |        |         |          |
| 5043     | 55.027   |        | 4878    | 47.294   |        |        |         |          |
| 6133     | 62.791   |        | 4002    | 52.774   |        |        |         |          |
| 5522.75  | 61.56725 |        | 5093    | 51.8095  |        |        |         |          |

|          |          |          |          |
|----------|----------|----------|----------|
| 666.4035 | 5.154899 | 947.299  | 3.163021 |
| 2872     | 11.281   | 2779     | 14.969   |
| 3044     | 19.941   | 2589     | 16.222   |
| 2230     | 19.91    | 2379     | 9.3317   |
| 3021     | 22.509   | 3113     | 8.9303   |
| 2765     | 20.78667 | 2693.667 | 11.49467 |
| 463.4663 | 1.491665 | 378.0282 | 4.098907 |
|          | 0        |          | 9.489062 |
|          | 4.474995 |          | 12.29672 |
|          | 4.474995 |          | 21.78578 |
|          | 40.78058 |          | 40.31483 |
|          | 0.109733 |          | 0.540391 |
|          | 0.890267 |          | 0.459609 |

|      |        |      |        |
|------|--------|------|--------|
| 1211 | 18.91  | 971  | 19.67  |
| 582  | 18.213 | 365  | 20.822 |
| 4062 | 20.162 | 5180 | 21.448 |
| 4621 | 18.026 | 5677 | 17.685 |
| 6972 | 31.297 | 5879 | 32.829 |
| 6728 | 31.436 | 5642 | 29.599 |



y



y  
y  
y

y

y

y

y



y  
y  
y

y

y

y

y

y

|                  |                             |                   | cell ct     | % inf         | AD            |
|------------------|-----------------------------|-------------------|-------------|---------------|---------------|
| 50069 A02        | M-013676- keratin assi      | 85280 KRTAP9-4    | 3994        | 14.747        | 3.463         |
| 50069 A04        | M-013657- keratin assi      | 85287 KRTAP4-7    | 4567        | 21.524        | 3.314         |
| 50069 A05        | M-007758- DIX domair        | 85458 DIXDC1      | 2555        | 14.325        | 3.885         |
| 50069 A06        | M-013660- keratin assi      | 85289 KRTAP4-5    | 2843        | 19.522        | 1.312         |
| 50069 A07        | M-029941- KIAA1731          | 85459 KIAA1731    | 3182        | 14.142        | 4.068         |
| 50069 A08        | M-013661- keratin assi      | 85291 KRTAP4-2    | 4038        | 15.602        | 2.608         |
| 50069 A09        | M-024214- KIAA1729 p        | 85460 KIAA1729    | 2735        | 22.413        | 4.203         |
| 50069 A10        | M-013655- keratin assi      | 85282 KRTAP4-14   | 3910        | 11.816        | 6.394         |
| 50069 A11        | M-023088- tetratricop       | 85461 TANC1       | 4533        | 21.112        | 2.902         |
| 50069 A12        | M-013686- keratin assi      | 85294 KRTAP2-4    | 3207        | 14.157        | 4.053         |
| 50069 A13        | M-024060- KIAA1727 p        | 85462 KIAA1727    | 3171        | 13.718        | 4.492         |
| 50069 A14        | M-021300- hematolog         | 90861 HN1L        | 3413        | 9.4931        | 8.7169        |
| 50069 A15        | M-026513- zinc finger       | 85463 ZC3H12C     | 4528        | 15.57         | 2.64          |
| 50069 A16        | M-015053- MSTP150           | 85027 MST150      | 4132        | 22.798        | 4.588         |
| <b>50069 A17</b> | <b>M-027817- selenoprot</b> | <b>85465 SELI</b> | <b>6783</b> | <b>29.191</b> | <b>10.981</b> |
| 50069 A18        | M-015046- family with       | 85002 FAM86B1     | 2519        | 16.038        | 2.172         |
| 50069 A19        | M-013685- G elongatic       | 85476 GFM1        | 3988        | 9.4534        | 8.7566        |
| 50069 A20        | M-015115- similar to Z      | 90816 MGC12518    | 4925        | 23.005        | 4.795         |
| 50069 A21        | M-015062- scinderin         | 85477 SCIN        | 4064        | 15.723        | 2.487         |
| 50069 A23        | M-015072- coiled-coil       | 85478 CCDC65      | 5299        | 17.324        | 0.886         |
| 50069 B02        | M-005789- ATG4 auto         | 115201 ATG4A      | 5371        | 18.47         | 0.26          |
| 50069 B04        | M-016682- zinc finger       | 115196 ZNF554     | 5375        | 14.195        | 4.015         |
| 50069 B05        | M-007111- synaptotag        | 94121 SYTL4       | 5857        | 11.525        | 6.685         |
| 50069 B06        | M-007116- membrane          | 115123 MARCH3     | 5223        | 13.67         | 4.54          |
| 50069 B07        | M-016567- synaptotag        | 94122 SYTL5       | 4239        | 9.5777        | 8.6323        |
| 50069 B08        | M-007495- solute carri      | 115111 SLC26A7    | 5972        | 24.246        | 6.036         |
| 50069 B09        | M-008729- Rho GTPasi        | 94134 ARHGAP12    | 5467        | 13.261        | 4.949         |
| 50069 B10        | M-027531- hypothetic        | 115110 LOC115110  | 5666        | 12.248        | 5.962         |
| 50069 B11        | M-018543- retinitis pig     | 94137 RP1L1       | 6882        | 21.011        | 2.801         |
| 50069 B12        | M-015608- coiled-coil       | 115098 CCDC124    | 3840        | 11.094        | 7.116         |
| 50069 B13        | M-008705- forkhead b        | 94234 FOXQ1       | 4716        | 14.97         | 3.24          |
| 50069 B14        | M-015167- 5'-nucleoti       | 115024 NT5C3L     | 4667        | 14.42         | 3.79          |
| 50069 B15        | M-031976- guanine nu        | 94235 GNG8        | 5303        | 8.7309        | 9.4791        |
| 50069 B16        | M-007497- solute carri      | 115019 SLC26A9    | 6169        | 25.677        | 7.467         |
| 50069 B17        | M-012473- H2A histon        | 94239 H2AFV       | 6004        | 31.446        | 13.236        |
| 50069 B18        | M-015607- chromosom         | 115004 C6orf150   | 5440        | 19.485        | 1.275         |
| 50069 B19        | M-015094- epithelial s      | 94240 EPSTI1      | 5239        | 21.378        | 3.168         |
| 50069 B20        | M-026194- zinc finger       | 114991 ZNF618     | 5953        | 27.768        | 9.558         |
| 50069 B21        | M-009689- testis speci      | 95681 TSGA14      | 4159        | 23.299        | 5.089         |
| 50069 B23        | M-023053- hypothetic        | 96597 LOC96597    | 6543        | 18.6          | 0.39          |
| 50069 C02        | M-018599- B melanom         | 85317 BAGE4       | 5079        | 16.992        | 1.218         |
| 50069 C04        | M-015975- SPOC doma         | 90853 SPOCD1      | 4316        | 14.62         | 3.59          |
| 50069 C05        | M-018419- DnaJ (Hsp4        | 85479 DNAJC5B     | 4778        | 22.771        | 4.561         |
| 50069 C06        | M-007104- zinc finger       | 90850 ZNF598      | 4441        | 12.385        | 5.825         |
| 50069 C07        | M-013671- thymic strc       | 85480 TSLP        | 5920        | 12.111        | 6.099         |
| 50069 C08        | M-016510- transcriptic      | 90843 TCEAL8      | 5708        | 16.538        | 1.672         |



|           |                         |                  |      |        |         |
|-----------|-------------------------|------------------|------|--------|---------|
| 50069 C09 | M-032199- scratch hor   | 85508 SCRT2      | 6074 | 15.147 | 3.063   |
| 50069 C10 | M-030737- hypothetical  | 90835 LOC90835   | 5109 | 18.497 | 0.287   |
| 50069 C11 | M-015063- galanin-like  | 85569 GALP       | 4419 | 9.1423 | 9.0677  |
| 50069 C12 | M-025188- zinc finger   | 90827 ZNF479     | 2734 | 6.9861 | 11.2239 |
| 50069 C13 | M-015064- GTP-bindin    | 85865 GTPBP10    | 4148 | 14.007 | 4.203   |
| 50069 C14 | M-024046- hypothetical  | 90826 LOC90826   | 5573 | 9.4384 | 8.7716  |
| 50069 C15 | M-019454- polyribonu    | 87178 PNPT1      | 5065 | 10.563 | 7.647   |
| 50069 C16 | M-016425- transmembr    | 90809 TMEM55B    | 6095 | 15.422 | 2.788   |
| 50069 C17 | M-030187- hypothetical  | 87769 RP11-151A  | 4518 | 15.516 | 2.694   |
| 50069 C18 | M-019132- angel hom     | 90806 ANGEL2     | 6216 | 18.356 | 0.146   |
| 50069 C19 | M-027120- ankyrin rep   | 88455 ANKRD13A   | 4981 | 14.475 | 3.735   |
| 50069 C20 | M-015529- coiled-coil   | 90799 CCDC45     | 7684 | 23.217 | 5.007   |
| 50069 C21 | M-015066- CG016         | 88523 RP11-298P  | 4609 | 19.787 | 1.577   |
| 50069 C23 | M-015067- chromosom     | 88745 C6orf153   | 4185 | 7.3596 | 10.8504 |
| 50069 D02 | M-031729- vasorin       | 114990 VASN      | 5072 | 11.08  | 7.13    |
| 50069 D04 | M-008459- WD repeat     | 114987 WDR31     | 5926 | 23.912 | 5.702   |
| 50069 D05 | M-013363- hypothetical  | 96610 LOC96610   | 4212 | 13.841 | 4.369   |
| 50069 D06 | M-015605- hypothetical  | 114984 LOC114984 | 4499 | 8.9353 | 9.2747  |
| 50069 D07 | M-015126- LIM and se    | 96626 LIMS3      | 6122 | 30.154 | 11.944  |
| 50069 D08 | M-018176- testis speci  | 114960 TSGA13    | 4650 | 14.538 | 3.672   |
| 50069 D09 | M-018116- myosin reg    | 103910 MRLC2     | 5112 | 20.872 | 2.662   |
| 50069 D10 | M-016004- Morf4 fami    | 114932 MRFAP1L1  | 4882 | 16.673 | 1.537   |
| 50069 D11 | M-004277- egl nine ho   | 112398 EGLN2     | 4352 | 11.673 | 6.537   |
| 50069 D12 | M-015604- G protein-c   | 114928 GPRASP2   | 4818 | 25.612 | 7.402   |
| 50069 D13 | M-004274- egl nine ho   | 112399 EGLN3     | 4465 | 19.754 | 1.544   |
| 50069 D14 | M-015490- chromosom     | 114926 C8orf40   | 4319 | 17.11  | 1.1     |
| 50069 D15 | M-015859- proline-rich  | 112476 PRRT2     | 5892 | 21.385 | 3.175   |
| 50069 D16 | M-015182- chromosom     | 114915 C5orf26   | 6369 | 34.652 | 16.442  |
| 50069 D17 | M-015252- exonucleas    | 112479 EXOD1     | 6543 | 28.962 | 10.752  |
| 50069 D18 | M-016683- C1q and tu    | 114905 C1QTNF7   | 5683 | 26.746 | 8.536   |
| 50069 D19 | M-008352- spermidine    | 112483 SAT2      | 5909 | 27.467 | 9.257   |
| 50069 D20 | M-019178- C1q and tu    | 114904 C1QTNF6   | 3789 | 19.161 | 0.951   |
| 50069 D21 | M-021299- chromosom     | 112487 C14orf126 | 4222 | 10.043 | 8.167   |
| 50069 D23 | M-015508- chromosom     | 112495 C6orf51   | 3706 | 9.7949 | 8.4151  |
| 50069 E02 | M-017154- pygopus hc    | 90780 PYGO2      | 6125 | 11.641 | 6.569   |
| 50069 E04 | M-018525- hypothetical  | 90768 MGC45800   | 6249 | 17.459 | 0.751   |
| 50069 E05 | M-007101- tripartite r  | 89122 TRIM4      | 6681 | 13.606 | 4.604   |
| 50069 E06 | M-017468- P antigen fi  | 90737 PAGE5      | 4627 | 20.705 | 2.495   |
| 50069 E07 | M-025312- dpy-19-like   | 89231 DPY19L1P1  | 6854 | 26.218 | 8.008   |
| 50069 E08 | M-015525- family with   | 90736 FAM104B    | 5516 | 20.123 | 1.913   |
| 50069 E09 | M-015282- testis speci  | 89765 TSGA2      | 5257 | 17.577 | 0.633   |
| 50069 E10 | M-005932- SEC11 hom     | 90701 SEC11C     | 5396 | 15.289 | 2.921   |
| 50069 E11 | M-008758- serpin pept   | 89777 SERPINB12  | 4799 | 13.315 | 4.895   |
| 50069 E12 | M-016556- coiled-coil   | 90693 CCDC126    | 3933 | 17.544 | 0.666   |
| 50069 E13 | M-015231- serpin pept   | 89778 SERPINB11  | 4062 | 13.22  | 4.99    |
| 50069 E14 | M-007103- leucine rich  | 90678 LRSAM1     | 3184 | 10.867 | 7.343   |
| 50069 E15 | M-018172- sialic acid b | 89790 SIGLEC10   | 4417 | 15.033 | 3.177   |

|           |                        |                  |      |        |         |
|-----------|------------------------|------------------|------|--------|---------|
| 50069 E16 | M-015521- chromoson    | 90668 C14orf121  | 6553 | 16.069 | 2.141   |
| 50069 E17 | M-015069- galactose-3  | 89792 GAL3ST3    | 5484 | 9.6098 | 8.6002  |
| 50069 E18 | M-013720- transducin   | 90665 TBL1Y      | 6233 | 18.193 | 0.017   |
| 50069 E19 | M-018348- neuron nav   | 89795 NAV3       | 5925 | 12.338 | 5.872   |
| 50069 E20 | M-031256- zinc finger  | 90649 ZNF486     | 5555 | 17.642 | 0.568   |
| 50069 E21 | M-017554- neuron nav   | 89796 NAV1       | 4479 | 11.855 | 6.355   |
| 50069 E23 | M-006370- neuron nav   | 89797 NAV2       | 5296 | 8.4592 | 9.7508  |
| 50069 F02 | M-013893- C1q and tu   | 114902 C1QTNF5   | 315  | 21.587 | 3.377   |
| 50069 F04 | M-014749- C1q and tu   | 114900 C1QTNF4   | 5505 | 12.407 | 5.803   |
| 50069 F05 | M-013438- sorting nex  | 112574 SNAG1     | 3774 | 11.288 | 6.922   |
| 50069 F06 | M-014681- C1q and tu   | 114899 C1QTNF3   | 4989 | 18.541 | 0.331   |
| 50069 F07 | M-015566- chromoson    | 112609 C6orf117  | 5972 | 22.019 | 3.809   |
| 50069 F08 | M-017146- C1q and tu   | 114898 C1QTNF2   | 4923 | 21.227 | 3.017   |
| 50069 F09 | M-015117- RWD doma     | 112611 RWDD2     | 4678 | 16.781 | 1.429   |
| 50069 F10 | M-014686- C1q and tu   | 114897 C1QTNF1   | 4745 | 14.9   | 3.31    |
| 50069 F11 | M-022934- tubulin, alp | 112714 TUBA3E    | 3556 | 18.813 | 0.603   |
| 50069 F12 | M-008415- oxysterol b  | 114885 OSBPL11   | 4675 | 16.941 | 1.269   |
| 50069 F13 | M-008628- retinol deh  | 112724 RDH13     | 4432 | 17.577 | 0.633   |
| 50069 F14 | M-009912- oxysterol b  | 114883 OSBPL9    | 5323 | 16.363 | 1.847   |
| 50069 F15 | M-007942- interleukin  | 112744 IL17F     | 5081 | 14.682 | 3.528   |
| 50069 F16 | M-009508- oxysterol b  | 114882 OSBPL8    | 5471 | 15.281 | 2.929   |
| 50069 F17 | M-015150- chromoson    | 112752 C14orf179 | 4804 | 12.261 | 5.949   |
| 50069 F18 | M-009234- oxysterol b  | 114881 OSBPL7    | 6072 | 12.368 | 5.842   |
| 50069 F19 | M-015151- syntaxin 1E  | 112755 STX1B2    | 6989 | 11.518 | 6.692   |
| 50069 F20 | M-009437- oxysterol b  | 114880 OSBPL6    | 7304 | 18.113 | 0.097   |
| 50069 F21 | M-016364- chromoson    | 112770 C1orf85   | 5896 | 17.368 | 0.842   |
| 50069 F23 | M-015118- keratin 71   | 112802 KRT71     | 4372 | 11.436 | 6.774   |
| 50069 G02 | M-019000- zinc finger, | 90637 ZFAND2A    | 217  | 6.4516 | 11.7584 |
| 50069 G04 | M-010256- START dom    | 90627 STARD13    | 5216 | 26.361 | 8.151   |
| 50069 G05 | M-024661- protein pho  | 89801 PPP1R3F    | 4120 | 12.354 | 5.856   |
| 50069 G06 | M-018887- Lyrn7 hom    | 90624 LYRM7      | 4920 | 6.8293 | 11.3807 |
| 50069 G07 | M-006260- potassium    | 89822 KCNK17     | 5208 | 14.689 | 3.521   |
| 50069 G08 | M-015506- zinc finger  | 90594 ZNF439     | 4013 | 12.011 | 6.199   |
| 50069 G09 | M-010371- FYVE, RhoC   | 89846 FGD3       | 4952 | 14.762 | 3.448   |
| 50069 G10 | M-031228- zinc finger  | 90592 ZNF700     | 3544 | 19.47  | 1.26    |
| 50069 G11 | M-015107- FCH and dc   | 89848 FCHSD1     | 3803 | 25.585 | 7.375   |
| 50069 G12 | M-015824- zinc finger  | 90589 ZNF625     | 3227 | 25.875 | 7.665   |
| 50069 G13 | M-026687- ATG16 aut    | 89849 ATG16L2    | 4195 | 22.122 | 3.912   |
| 50069 G14 | M-015520- chromoson    | 90580 C19orf52   | 4251 | 12.35  | 5.86    |
| 50069 G15 | M-026207- family with  | 89853 FAM125B    | 4307 | 13.838 | 4.372   |
| 50069 G16 | M-031235- zinc finger  | 90576 ZNF799     | 6619 | 25.835 | 7.625   |
| 50069 G17 | M-015291- kelch-like 6 | 89857 KLHL6      | 4122 | 10.553 | 7.657   |
| 50069 G18 | M-015519- coiled-coil  | 90550 CCDC109A   | 5314 | 14.791 | 3.419   |
| 50069 G19 | M-015073- leucine zip  | 89866 LZTR2      | 4763 | 15.893 | 2.317   |
| 50069 G20 | M-018310- chromoson    | 90529 C1orf201   | 4264 | 8.0441 | 10.1659 |
| 50069 G21 | M-008303- phospholip   | 89869 PLCZ1      | 5670 | 16.049 | 2.161   |
| 50069 G23 | M-007102- tripartite r | 89870 TRIM15     | 6103 | 13.944 | 4.266   |

|                  |                            |                       |             |               |              |
|------------------|----------------------------|-----------------------|-------------|---------------|--------------|
| 50069 H02        | M-009274- oxysterol b      | 114879 OSBPL5         | 6557        | 18.225        | 0.015        |
| 50069 H04        | M-022161- forkhead-a       | 114827 FHAD1          | 4925        | 26.985        | 8.775        |
| 50069 H05        | M-015253- similar to R     | 112812 MGC19604       | 4662        | 17.503        | 0.707        |
| 50069 H06        | M-022995- SET and M        | 114826 SMYD4          | 5334        | 22.235        | 4.025        |
| 50069 H07        | M-018686- chromosom        | 112817 C10orf65       | 3380        | 14.675        | 3.535        |
| 50069 H08        | M-024302- MSTP101          | 114825 MST101         | 5070        | 22.11         | 3.9          |
| 50069 H09        | M-015254- WD repeat        | 112840 WDR89          | 4158        | 20.924        | 2.714        |
| 50069 H10        | M-015165- paraneopla       | 114824 PNMA5          | 5165        | 28.771        | 10.561       |
| 50069 H11        | M-010373- chromosom        | 112849 C14orf149      | 4606        | 19.062        | 0.852        |
| 50069 H12        | M-015163- rhophilin, F     | 114822 RHPN1          | 3822        | 19.754        | 1.544        |
| 50069 H13        | M-003986- coiled-coil      | 112869 CCDC101        | 4744        | 21.058        | 2.848        |
| 50069 H14        | M-025127- zinc finger      | 114821 ZNF452         | 4234        | 28.909        | 10.699       |
| 50069 H15        | M-007113- PHD finger       | 112885 PHF21B         | 4302        | 14.179        | 4.031        |
| 50069 H16        | M-022194- KIAA1922 p       | 114819 KIAA1922       | 5239        | 28.288        | 10.078       |
| 50069 H17        | M-015152- vacuolar pr      | 112936 VPS26B         | 4858        | 22.417        | 4.207        |
| 50069 H18        | M-030564- KIAA1920 p       | 114817 KIAA1920       | 4110        | 9.1727        | 9.0373       |
| 50069 H19        | M-015575- galactosida      | 112937 GLB1L3         | 4432        | 16.855        | 1.355        |
| 50069 H20        | M-023084- UDP-N-ace        | 114805 GALNT13        | 3936        | 14.914        | 3.296        |
| 50069 H21        | M-015255- coiled-coil      | 112942 CCDC104        | 4953        | 37.876        | 19.666       |
| 50069 H23        | M-015576- KTI12 hom        | 112970 KTI12          | 4507        | 14.045        | 4.165        |
| 50069 I02        | M-016396- dual oxidas      | 90527 DUOXA1          | 4517        | 13.682        | 4.528        |
| 50069 I04        | M-022237- Src homolc       | 90525 SHF             | 3641        | 15.737        | 2.473        |
| 50069 I05        | M-017487- aquaporin        | 89872 AQP10           | 4749        | 21.331        | 3.121        |
| 50069 I06        | M-015915- chromosom        | 90523 C6orf142        | 4749        | 24.847        | 6.637        |
| 50069 I07        | M-007481- solute carri     | 89874 SLC25A21        | 4748        | 30.455        | 12.245       |
| 50069 I08        | M-015128- Yip1 intera      | 90522 YIF1B           | 3840        | 23.984        | 5.774        |
| 50069 I09        | M-015068- fetal and ac     | 89885 FATE1           | 2223        | 10.616        | 7.594        |
| 50069 I10        | M-028873- hypothetic       | 90520 LOC90520        | 3763        | 21.1          | 2.89         |
| 50069 I11        | M-015109- SLAM famil       | 89886 SLAMF9          | 3581        | 11.589        | 6.621        |
| 50069 I12        | M-015516- secernin 2       | 90507 SCRIN2          | 2515        | 26.203        | 7.993        |
| 50069 I13        | M-023876- zinc finger      | 89887 ZNF628          | 2662        | 12.81         | 5.4          |
| 50069 I14        | M-015114- leucine rich     | 90506 LRRC46          | 3213        | 9.4927        | 8.7173       |
| 50069 I15        | M-015802- kelch repea      | 89890 KBTBD6          | 4440        | 14.662        | 3.548        |
| 50069 I16        | M-027894- hypothetic       | 90499 LOC90499        | 4832        | 14.694        | 3.516        |
| 50069 I17        | M-015136- WD repeat        | 89891 WDR34           | 3828        | 17.45         | 0.76         |
| 50069 I18        | M-015480- chromosom        | 90488 C12orf23        | 5490        | 16.393        | 1.817        |
| 50069 I19        | M-015507- transmemk        | 89894 TMEM116         | 3471        | 17.862        | 0.348        |
| 50069 I20        | M-019412- zinc finger      | 90462 ZNF605          | 6295        | 24.527        | 6.317        |
| <b>50069 I21</b> | <b>M-015078- chromosom</b> | <b>89927 C16orf45</b> | <b>4801</b> | <b>26.453</b> | <b>8.243</b> |
| 50069 I23        | M-030307- papilin, prc     | 89932 PAPLN           | 5044        | 17.843        | 0.367        |
| 50069 J02        | M-022965- ring finger      | 114804 RNF157         | 3977        | 15.615        | 2.595        |
| 50069 J04        | M-005905- myb-like, S      | 114803 MYSM1          | 4895        | 16.65         | 1.56         |
| 50069 J05        | M-015222- RNA pseud        | 113000 RPU5D1         | 4238        | 23.313        | 5.103        |
| 50069 J06        | M-015162- KIAA1913         | 114801 KIAA1913       | 4896        | 17.096        | 1.114        |
| 50069 J07        | M-008649- phospholip       | 113026 PLCD3          | 3035        | 16.639        | 1.571        |
| 50069 J08        | M-022684- coiled-coil      | 114800 CCDC85A        | 3812        | 18.73         | 0.52         |
| 50069 J09        | M-015495- family with      | 113115 FAM54A         | 2817        | 13.028        | 5.182        |

|                  |                               |                       |             |               |               |
|------------------|-------------------------------|-----------------------|-------------|---------------|---------------|
| 50069 J10        | M-023413- establishm          | 114799 ESCO1          | 4184        | 29.039        | 10.829        |
| 50069 J11        | M-015256- cell divisio        | 113130 CDCA5          | 3754        | 20.325        | 2.115         |
| 50069 J12        | M-021768- SLIT and N          | 114798 SLITRK1        | 3347        | 22.289        | 4.079         |
| 50069 J13        | M-022014- AHNAK nuc           | 113146 AHNAK2         | 3213        | 17.647        | 0.563         |
| 50069 J14        | M-027097- transmemk           | 114795 TMEM132E       | 2736        | 13.596        | 4.614         |
| 50069 J15        | M-015583- serum amy           | 113174 SAAL1          | 4194        | 17            | 1.21          |
| 50069 J16        | M-024572- leucine ric         | 114794 LRRC62         | 4001        | 16.371        | 1.839         |
| 50069 J17        | M-023899- chromoson           | 113177 C19orf36       | 3716        | 13.025        | 5.185         |
| 50069 J18        | M-031993- formin-like         | 114793 FMNL2          | 3964        | 11.251        | 6.959         |
| 50069 J19        | M-015226- secretory c         | 113178 SCAMP4         | 5577        | 29.155        | 10.945        |
| 50069 J20        | M-015161- kelch-like 3        | 114792 KLHL32         | 4891        | 18.81         | 0.6           |
| 50069 J21        | M-015584- hypothetic          | 113179 LOC113179      | 6191        | 21.58         | 3.37          |
| 50069 J23        | M-008821- carbohydra          | 113189 CHST14         | 3516        | 12.059        | 6.151         |
| 50069 K02        | M-015113- zinc finger         | 90441 ZNF622          | 5665        | 29.214        | 11.004        |
| 50069 K04        | M-004393- Bcl2 modif          | 90427 BMF             | 3731        | 26.534        | 8.324         |
| 50069 K05        | M-008340- ras homolo          | 89941 RHOT2           | 6120        | 32.565        | 14.355        |
| 50069 K06        | M-019427- ATPase, H+          | 90423 ATP6V1E2        | 5409        | 27.066        | 8.856         |
| <b>50069 K07</b> | <b>M-018681- hypothetic</b>   | <b>89944 LOC89944</b> | <b>3893</b> | <b>32.802</b> | <b>14.592</b> |
| 50069 K08        | M-022219- chromoson           | 90417 C15orf23        | 4449        | 31.31         | 13.1          |
| 50069 K09        | M-015510- kinesin ligh        | 89953 KLC4            | 1341        | 57.494        | 39.284        |
| 50069 K10        | M-019187- coiled-coil         | 90416 CCDC32          | 2801        | 26.562        | 8.352         |
| 50069 K11        | M-017787- chromoson           | 89958 C9orf140        | 3980        | 25.276        | 7.066         |
| 50069 K12        | M-003707- multiple co         | 90411 MCFD2           | 3439        | 28.758        | 10.548        |
| 50069 K13        | M-031880- ATP bindin          | 89978 ATPBD4          | 2145        | 26.713        | 8.503         |
| <b>50069 K14</b> | <b>M-017747- intraflagell</b> | <b>90410 IFT20</b>    | <b>3354</b> | <b>32.528</b> | <b>14.318</b> |
| 50069 K15        | M-023894- midnolin            | 90007 MIDN            | 4246        | 14.908        | 3.302         |
| 50069 K16        | M-015245- transmemk           | 90407 TMEM41A         | 4151        | 20.381        | 2.171         |
| 50069 K17        | M-031877- killer cell in      | 90011 KIR3DX1         | 3225        | 16.372        | 1.838         |
| 50069 K18        | M-015244- thyroid hor         | 90390 THRAP6          | 4573        | 19.375        | 1.165         |
| 50069 K19        | M-019166- synaptotag          | 90019 SYT8            | 5248        | 24.314        | 6.104         |
| 50069 K20        | M-018755- chromoson           | 90381 C15orf42        | 5018        | 28.956        | 10.746        |
| <b>50069 K21</b> | <b>M-024870- chromoson</b>    | <b>90025 C6orf157</b> | <b>5805</b> | <b>24.72</b>  | <b>6.51</b>   |
| 50069 K23        | M-018683- chromoson           | 90050 C14orf152       | 5740        | 19.895        | 1.685         |
| 50069 L02        | M-015160- tubulin, ga         | 114791 TUBGCP5        | 4244        | 24.175        | 5.965         |
| 50069 L04        | M-007355- solute carri        | 114789 SLC25A25       | 3680        | 24.484        | 6.274         |
| 50069 L05        | M-019048- cancer susc         | 113201 CASC4          | 3628        | 24.063        | 5.853         |
| 50069 L06        | M-007869- CUB and Sc          | 114788 CSMD3          | 3769        | 22.818        | 4.608         |
| 50069 L07        | M-031238- hypothetic          | 113230 LOC113230      | 3278        | 25.351        | 7.141         |
| 50069 L08        | M-015158- G protein r         | 114787 GPRIN1         | 3078        | 30.507        | 12.297        |
| 50069 L09        | M-018653- solute carri        | 113235 SLC46A1        | 2504        | 31.03         | 12.82         |
| 50069 L10        | M-025942- XK, Kell blo        | 114786 XKR4           | 3792        | 30.301        | 12.091        |
| 50069 L11        | M-015586- chromoson           | 113246 C12orf57       | 4111        | 33.155        | 14.945        |
| 50069 L12        | M-015157- methyl-CpG          | 114785 MBD6           | 3193        | 29.533        | 11.323        |
| 50069 L13        | M-016523- La ribonucl         | 113251 LARP4          | 2846        | 24.596        | 6.386         |
| <b>50069 L14</b> | <b>M-007868- CUB and Sc</b>   | <b>114784 CSMD2</b>   | <b>4057</b> | <b>39.537</b> | <b>21.327</b> |
| 50069 L15        | M-025295- glucocortic         | 113263 GLCC1          | 3330        | 26.547        | 8.337         |
| 50069 L16        | M-023922- KIAA1881            | 114782 KIAA1881       | 2119        | 26.239        | 8.029         |

|                  |                              |                        |             |               |               |
|------------------|------------------------------|------------------------|-------------|---------------|---------------|
| 50069 L17        | M-016385- transmembr         | 113277 TMEM106A        | 4797        | 33.646        | 15.436        |
| 50069 L18        | M-016128- BTB (POZ) c        | 114781 BTBD9           | 5008        | 30.671        | 12.461        |
| <b>50069 L19</b> | <b>M-015119- chromosom</b>   | <b>113278 C20orf54</b> | <b>6307</b> | <b>42.302</b> | <b>24.092</b> |
| 50069 L20        | M-013421- polycystic k       | 114780 PKD1L2          | 6574        | 32.705        | 14.495        |
| 50069 L21        | M-016568- similar to e       | 113386 LOC113386       | 6264        | 30.556        | 12.346        |
| 50069 L23        | M-016199- SFT2 doma          | 113402 SFT2D1          | 5977        | 29.245        | 11.035        |
| 50069 M02        | M-031237- hypothetic         | 90379 LOC90379         | 5973        | 25.264        | 7.054         |
| 50069 M04        | M-028185- sterile alph       | 90378 SAMD1            | 5855        | 24.475        | 6.265         |
| 50069 M05        | M-015130- coiled-coil        | 90060 CCDC120          | 5153        | 16.845        | 1.365         |
| 50069 M06        | M-016393- family with        | 90362 FAM110B          | 5371        | 20.387        | 2.177         |
| 50069 M07        | M-013719- lacritin           | 90070 LACRT            | 5313        | 27.649        | 9.439         |
| 50069 M08        | M-015082- chromosom          | 90355 C5orf30          | 3795        | 32.358        | 14.148        |
| 50069 M09        | M-019334- zinc finger        | 90075 ZNF30            | 3932        | 29.196        | 10.986        |
| 50069 M10        | M-015790- ATP bindin         | 90353 ATPBD3           | 4348        | 25.483        | 7.273         |
| 50069 M11        | M-016702- pleckstrin k       | 90102 PHLDB2           | 4286        | 20.135        | 1.925         |
| 50069 M12        | M-022844- fer-1-like 5       | 90342 FER1L5           | 3226        | 23.218        | 5.008         |
| 50069 M13        | M-023782- hypothetic         | 90113 LOC90113         | 3552        | 17.23         | 0.98          |
| 50069 M14        | M-023812- zinc finger        | 90333 ZNF468           | 2988        | 19.277        | 1.067         |
| <b>50069 M15</b> | <b>M-029408- hypothetic</b>  | <b>90120 LOC90120</b>  | <b>3812</b> | <b>34.706</b> | <b>16.496</b> |
| 50069 M16        | M-017806- exocyst cor        | 90332 EXOC3L2          | 4494        | 29.239        | 11.029        |
| <b>50069 M17</b> | <b>M-015211- TSR2, 20S r</b> | <b>90121 TSR2</b>      | <b>5060</b> | <b>32.688</b> | <b>14.478</b> |
| 50069 M18        | M-031883- THAP doma          | 90326 THAP3            | 4249        | 19.04         | 0.83          |
| 50069 M19        | M-023760- keratin 8 p        | 90133 KRT8P12          | 5929        | 24.287        | 6.077         |
| <b>50069 M20</b> | <b>M-015139- coiled-coil</b> | <b>90324 CCDC97</b>    | <b>6708</b> | <b>38.283</b> | <b>20.073</b> |
| 50069 M21        | M-015097- BTB (POZ) c        | 90135 BTBD6            | 4336        | 15.383        | 2.827         |
| 50069 M23        | M-015297- tetraspanin        | 90139 TSPAN18          | 5792        | 27.762        | 9.552         |
| 50069 N02        | M-008608- peptidogly         | 114771 PGLYRP3         | 5815        | 16.836        | 1.374         |
| 50069 N04        | M-008638- peptidogly         | 114770 PGLYRP2         | 3945        | 21.47         | 3.26          |
| 50069 N05        | M-016193- testis expre       | 113419 TEX261          | 4938        | 16.646        | 1.564         |
| 50069 N06        | M-004411- caspase-1 c        | 114769 COP1            | 4807        | 14.416        | 3.794         |
| <b>50069 N07</b> | <b>M-018278- chromosom</b>   | <b>113444 C1orf212</b> | <b>4478</b> | <b>33.318</b> | <b>15.108</b> |
| 50069 N08        | M-016960- cytoglobin         | 114757 CYGB            | 3778        | 13.446        | 4.764         |
| 50069 N09        | M-008374- arginine de        | 113451 ADC             | 4616        | 26.083        | 7.873         |
| 50069 N10        | M-015156- leucine rich       | 114659 LRRC37B         | 3678        | 16.694        | 1.516         |
| 50069 N11        | M-015127- transmembr         | 113452 TMEM54          | 3848        | 18.997        | 0.787         |
| 50069 N12        | M-017103- erythroblas        | 114625 ERMAP           | 3929        | 17.943        | 0.267         |
| 50069 N13        | M-022902- tubulin, alp       | 113457 TUBA3D          | 3318        | 29.928        | 11.718        |
| 50069 N14        | M-007460- solute carri       | 114571 SLC22A9         | 3505        | 15.578        | 2.632         |
| 50069 N15        | M-015379- DNA helica         | 113510 HEL308          | 3992        | 26.478        | 8.268         |
| 50069 N16        | M-015155- mal, T-cell        | 114569 MAL2            | 3846        | 18.435        | 0.225         |
| 50069 N17        | M-010750- CKLF-like N        | 113540 CMTM1           | 4301        | 18.159        | 0.051         |
| 50069 N18        | M-020285- EF-hand do         | 114327 EFHC1           | 4349        | 30.306        | 12.096        |
| 50069 N19        | M-019422- cytochrom          | 113612 CYP2U1          | 4595        | 28.118        | 9.908         |
| 50069 N20        | M-015186- paralemmi          | 114299 PALM2           | 4997        | 17.05         | 1.16          |
| 50069 N21        | M-015597- major facili       | 113655 MFSD3           | 5610        | 11.979        | 6.231         |
| 50069 N23        | M-008640- alpha tubul        | 113691 MGC16703        | 5283        | 20.803        | 2.593         |
| 50069 O02        | M-023807- zinc finger        | 90321 ZNF766           | 3606        | 12.451        | 5.759         |

|                  |                           |                    |             |               |               |
|------------------|---------------------------|--------------------|-------------|---------------|---------------|
| 50069 O04        | M-023805- zinc finger     | 90317 ZNF616       | 4841        | 13.344        | 4.866         |
| 50069 O05        | M-015819- chromosom       | 90141 C14orf143    | 3620        | 9.1436        | 9.0664        |
| 50069 O06        | M-015518- tumor prot      | 90313 TP53I13      | 4960        | 8.5484        | 9.6616        |
| 50069 O07        | M-015558- heparan su      | 90161 HS6ST2       | 3778        | 15.061        | 3.149         |
| 50069 O08        | M-015125- kelch-like 1    | 90293 KLHL13       | 4375        | 19.68         | 1.47          |
| <b>50069 O09</b> | <b>M-019331- FERM dom</b> | <b>90167 FRMD7</b> | <b>4166</b> | <b>33.581</b> | <b>15.371</b> |
| 50069 O10        | M-023593- chromosom       | 90288 C3orf25      | 3899        | 14.773        | 3.437         |
| 50069 O11        | M-024190- elastin mic     | 90187 EMILIN3      | 3312        | 17.935        | 0.275         |
| 50069 O12        | M-015081- carcinoeml      | 90273 CEACAM21     | 2975        | 12.269        | 5.941         |
| 50069 O13        | M-018309- chromosom       | 90198 C19orf49     | 2830        | 13.074        | 5.136         |
| 50069 O14        | M-026305- chromosom       | 90271 C10orf75     | 2784        | 20.941        | 2.731         |
| 50069 O15        | M-017629- WAP four-c      | 90199 WFDC8        | 2795        | 11.628        | 6.582         |
| 50069 O16        | M-018991- family with     | 90268 FAM105B      | 3890        | 12.185        | 6.025         |
| 50069 O17        | M-013643- sorting nex     | 90203 SNX21        | 3910        | 25.601        | 7.391         |
| 50069 O18        | M-024315- unc-5 homi      | 90249 UNC5A        | 4169        | 26.913        | 8.703         |
| 50069 O19        | M-018444- zinc finger,    | 90204 ZSWIM1       | 4441        | 26.12         | 7.91          |
| 50069 O20        | M-015515- zinc finger     | 90233 ZNF551       | 3648        | 18.914        | 0.704         |
| 50069 O21        | M-018173- urocortin 2     | 90226 UCN2         | 3739        | 16.315        | 1.895         |
| 50069 O23        | M-015511- KIAA2013        | 90231 KIAA2013     | 3946        | 21.262        | 3.052         |
| 50069 P02        | M-005922- lactamase,      | 114294 LACTB       | 3207        | 17.431        | 0.779         |
| 50069 P04        | M-007513- solute carri    | 114134 SLC2A13     | 3449        | 21.398        | 3.188         |
| 50069 P05        | M-015600- kelch doma      | 113730 KLHDC7B     | 3697        | 11.388        | 6.822         |
| 50069 P06        | M-015190- urocortin 3     | 114131 UCN3        | 2388        | 14.992        | 3.218         |
| 50069 P07        | M-015199- outer dens      | 113746 ODF3        | 2607        | 16.532        | 1.678         |
| 50069 P08        | M-012974- tripartite r    | 114088 TRIM9       | 2153        | 9.9861        | 8.2239        |
| 50069 P09        | M-015601- chromosom       | 113763 C7orf29     | 2059        | 24.575        | 6.365         |
| 50069 P10        | M-009383- Williams Be     | 114049 WBSCR22     | 1782        | 14.759        | 3.451         |
| 50069 P11        | M-021298- phosphoin       | 113791 PIK3IP1     | 1788        | 17.841        | 0.369         |
| 50069 P12        | M-016405- chromosom       | 114043 C21orf90    | 1554        | 20.399        | 2.189         |
| 50069 P13        | M-016309- chromosom       | 113802 C1orf59     | 2092        | 28.967        | 10.757        |
| 50069 P14        | M-016163- chromosom       | 114041 C21orf88    | 2552        | 18.339        | 0.129         |
| 50069 P15        | M-015492- family with     | 113828 FAM83F      | 2617        | 21.207        | 2.997         |
| 50069 P16        | M-016161- chromosom       | 114038 C21orf84    | 2655        | 14.237        | 3.973         |
| 50069 P17        | M-007540- solute carri    | 113829 SLC35A4     | 3179        | 12.677        | 5.533         |
| 50069 P18        | M-016652- chromosom       | 114036 C21orf82    | 3303        | 21.375        | 3.165         |
| 50069 P19        | M-015111- zinc finger     | 113835 ZNF257      | 3647        | 28.27         | 10.06         |
| 50069 P20        | M-016651- chromosom       | 114035 C21orf81    | 3202        | 18.676        | 0.466         |
| 50069 P21        | M-007115- zinc finger,    | 114026 ZIM3        | 3689        | 19.789        | 1.579         |
| 50069 P23        | M-018386- target of E     | 114034 TOE1        | 4067        | 26.063        | 7.853         |
|                  |                           | mdmdMAC            | 4396        | 18.209        | 4.611         |
|                  |                           | 2MAD               |             |               | 9.222         |
|                  |                           | 3MAD               |             |               | 13.833        |
|                  |                           | MADc               |             |               | 6.82428       |
| 50069 C22        |                           |                    | 5606        | 54.299        |               |
| 50069 D22        |                           |                    | 5287        | 53.622        |               |
| 50069 E22        |                           |                    | 4391        | 51.56         |               |
| 50069 F22        |                           |                    | 5927        | 48.541        |               |

|           |                                   |      |           |          |          |
|-----------|-----------------------------------|------|-----------|----------|----------|
|           |                                   |      | mn        | 5302.75  | 52.0055  |
|           |                                   |      | sd        | 661.6103 | 2.58679  |
| 50069 G22 |                                   |      |           | 2868     | 9.4142   |
| 50069 H22 |                                   |      |           | 2646     | 23.583   |
| 50069 I22 |                                   |      |           | 2054     | 14.849   |
| 50069 J22 |                                   |      |           | 3468     | 19.377   |
|           |                                   |      | mn        | 2722.667 | 19.26967 |
|           |                                   |      | sd        | 710.1108 | 4.367989 |
|           |                                   |      | 3psSD     |          | 7.76037  |
|           |                                   |      | 3ngSD     |          | 13.10397 |
|           |                                   |      | SumSD     |          | 20.86434 |
|           |                                   |      | DiffMn    |          | 32.73583 |
|           |                                   |      | SmovrDiff |          | 0.637355 |
|           |                                   |      | 1minus    |          | 0.362645 |
| 50069 G03 | M-003290- polo-like ki            | 5347 | PLK1 SMAR | 674      | 15.282   |
| 50069 H03 | M-003290- polo-like ki            | 5347 | PLK1 SMAR | 1244     | 18.971   |
| 50069 I03 | D-001206- siControl non-targeting |      |           | 3465     | 22.54    |
| 50069 J03 | D-001206- siControl non-targeting |      |           | 4061     | 20.734   |
| 50069 K03 | D-001600- (siGLO RISC-free siRNA  |      |           | 6293     | 40.775   |
| 50069 L03 | D-001600- (siGLO RISC-free siRNA  |      |           | 4459     | 28.773   |

| rZ              | cell ct     | % inf         | AD            | rZ              | cell ct     | % inf         | AD            | rZ              |
|-----------------|-------------|---------------|---------------|-----------------|-------------|---------------|---------------|-----------------|
| -0.50731        | 3531        | 12.659        | 1.531         | -0.21269        | 3769        | 12.337        | 1.783         | -0.26976        |
| 0.485766        | 3532        | 19.394        | 5.204         | 0.720805        | 3834        | 17.058        | 2.938         | 0.4449          |
| -0.56914        | 2587        | 14.65         | 0.46          | 0.063272        | 3575        | 14.434        | 0.314         | 0.047684        |
| 0.192401        | 2015        | 21.836        | 7.646         | 1.059273        | 2664        | 14.827        | 0.707         | 0.107176        |
| -0.59596        | 2149        | 11.354        | 2.836         | -0.39356        | 4050        | 16.025        | 1.905         | 0.288526        |
| -0.38202        | 4443        | 13.842        | 0.348         | -0.04872        | 5680        | 14.806        | 0.686         | 0.103997        |
| 0.616036        | 2042        | 22.674        | 8.484         | 1.175423        | 3326        | 24.654        | 10.534        | 1.594767        |
| -0.9368         | 2809        | 19.9          | 5.71          | 0.790938        | 3651        | 15.941        | 1.821         | 0.275811        |
| 0.425393        | 2529        | 13.365        | 0.825         | -0.11483        | 3982        | 15.218        | 1.098         | 0.166364        |
| -0.59376        | 1306        | 10.873        | 3.317         | -0.46023        | 2572        | 13.142        | 0.978         | -0.1479         |
| -0.65809        | 2135        | 16.066        | 1.876         | 0.259534        | 1916        | 10.177        | 3.943         | -0.59673        |
| -1.27719        | 2524        | 12.48         | 1.71          | -0.2375         | 3301        | 11.815        | 2.305         | -0.34877        |
| -0.38671        | 2614        | 14.04         | 0.15          | -0.02128        | 3088        | 13.925        | 0.195         | -0.02937        |
| 0.672452        | 3094        | 24.661        | 10.471        | 1.450827        | 4739        | 20.743        | 6.623         | 1.002728        |
| <b>1.609254</b> | <b>4146</b> | <b>33.237</b> | <b>19.047</b> | <b>2.639486</b> | <b>4044</b> | <b>35.163</b> | <b>21.043</b> | <b>3.185599</b> |
| -0.31813        | 642         | 19.315        | 5.125         | 0.709855        | 1517        | 15.359        | 1.239         | 0.187709        |
| -1.28301        | 1291        | 16.499        | 2.309         | 0.319549        | 2668        | 9.2204        | 4.8996        | -0.74154        |
| 0.702785        | 3802        | 26.854        | 12.664        | 1.754783        | 3381        | 18.87         | 4.75          | 0.719197        |
| -0.36429        | 3493        | 13.37         | 0.82          | -0.11414        | 2398        | 14.345        | 0.225         | 0.034211        |
| -0.12968        | 3393        | 16.475        | 2.285         | 0.316223        | 3708        | 19.714        | 5.594         | 0.84696         |
| 0.038246        | 4520        | 7.7655        | 6.4245        | -0.89094        | 4314        | 8.5999        | 5.5201        | -0.83547        |
| -0.58819        | 3976        | 6.4889        | 7.7011        | -1.06788        | 4548        | 10.884        | 3.236         | -0.48971        |
| -0.97944        | 4665        | 7.8242        | 6.3658        | -0.8828         | 4935        | 9.1388        | 4.9812        | -0.75389        |
| -0.66513        | 2811        | 5.1939        | 8.9961        | -1.24737        | 4584        | 14.791        | 0.671         | 0.101726        |
| -1.26479        | 2563        | 3.3945        | 10.7955       | -1.49677        | 4524        | 9.107         | 5.013         | -0.75871        |
| 0.884635        | 3147        | 10.709        | 3.481         | -0.48296        | 5170        | 18.066        | 3.946         | 0.597489        |
| -0.72506        | 2633        | 8.0137        | 6.1763        | -0.85654        | 4667        | 16.456        | 2.336         | 0.35377         |
| -0.8735         | 2831        | 8.6542        | 5.5358        | -0.76776        | 4239        | 6.8648        | 7.2552        | -1.09813        |
| 0.410593        | 3018        | 10.57         | 3.62          | -0.50223        | 5216        | 9.2408        | 4.8792        | -0.73845        |
| -1.0426         | 2078        | 4.3792        | 9.8108        | -1.36029        | 3303        | 8.4771        | 5.6429        | -0.85406        |
| -0.47463        | 2152        | 9.2937        | 4.8963        | -0.67913        | 4362        | 12.173        | 1.947         | -0.29458        |
| -0.55522        | 2257        | 6.1143        | 8.0757        | -1.1198         | 4688        | 8.2978        | 5.8222        | -0.8812         |
| -1.38888        | 2826        | 5.5202        | 8.6698        | -1.20215        | 4919        | 8.6196        | 5.5004        | -0.83249        |
| 1.094328        | 2683        | 15.095        | 0.905         | 0.124951        | 6022        | 21.886        | 7.766         | 1.175753        |
| 1.939692        | 3251        | 18.025        | 3.835         | 0.531057        | 6236        | 27.037        | 12.917        | 1.955501        |
| 0.186979        | 3943        | 8.8765        | 5.3135        | -0.73695        | 5767        | 21.172        | 7.052         | 1.067669        |
| 0.464371        | 2757        | 7.8709        | 6.3191        | -0.87633        | 4617        | 13.039        | 1.081         | -0.16349        |
| 1.400734        | 3206        | 16.687        | 2.497         | 0.345607        | 5438        | 26.683        | 12.563        | 1.901913        |
| 0.745866        | 2305        | 9.5011        | 4.6889        | -0.65038        | 4775        | 22.45         | 8.33          | 1.26113         |
| 0.057295        | 3088        | 4.4689        | 9.7211        | -1.34786        | 4087        | 15.317        | 1.197         | 0.181351        |
| -0.17833        | 4350        | 6.9195        | 7.2705        | -1.0082         | 5387        | 12.66         | 1.46          | -0.22086        |
| -0.52592        | 4187        | 10.843        | 3.347         | -0.46439        | 5899        | 12.731        | 1.389         | -0.21011        |
| 0.668495        | 3847        | 17.052        | 2.862         | 0.396197        | 5338        | 18.809        | 4.689         | 0.709963        |
| -0.85342        | 3649        | 8.4133        | 5.7767        | -0.80115        | 4438        | 11.469        | 2.651         | -0.40115        |
| -0.89357        | 3925        | 9.4777        | 4.7123        | -0.65362        | 6137        | 13.15         | 0.97          | -0.14669        |
| -0.24486        | 3306        | 7.4713        | 6.7187        | -0.93172        | 6370        | 17.755        | 3.635         | 0.55041         |



|          |      |        |         |          |      |        |         |          |
|----------|------|--------|---------|----------|------|--------|---------|----------|
| -0.44869 | 3740 | 10.642 | 3.548   | -0.49225 | 4958 | 6.5752 | 7.5448  | -1.14197 |
| 0.042202 | 2918 | 14.496 | 0.306   | 0.041927 | 4277 | 12.626 | 1.494   | -0.22601 |
| -1.32859 | 2218 | 9.2426 | 4.9474  | -0.68621 | 4901 | 8.4269 | 5.6931  | -0.86166 |
| -1.64455 | 1700 | 5.6471 | 8.5429  | -1.18456 | 2237 | 3.755  | 10.365  | -1.56888 |
| -0.61574 | 3291 | 10.665 | 3.525   | -0.48906 | 3561 | 5.9253 | 8.1947  | -1.24035 |
| -1.28521 | 3458 | 7.9237 | 6.2663  | -0.86901 | 5499 | 4.0735 | 10.0465 | -1.52067 |
| -1.12041 | 3917 | 14.526 | 0.336   | 0.046085 | 5046 | 10.186 | 3.934   | -0.59537 |
| -0.40839 | 3483 | 9.9627 | 4.2273  | -0.5864  | 4727 | 7.8062 | 6.3138  | -0.95562 |
| -0.39462 | 2816 | 17.152 | 2.962   | 0.410057 | 3360 | 9.4643 | 4.6557  | -0.70462 |
| 0.021541 | 2740 | 22.372 | 8.182   | 1.133564 | 5107 | 19.561 | 5.441   | 0.823799 |
| -0.54716 | 3171 | 12.804 | 1.386   | -0.19259 | 4913 | 4.193  | 9.927   | -1.50258 |
| 0.73385  | 5014 | 17.511 | 3.321   | 0.459815 | 5645 | 11.408 | 2.712   | -0.41039 |
| 0.231233 | 3260 | 15.583 | 1.393   | 0.192589 | 4346 | 12.172 | 1.948   | -0.29473 |
| -1.58982 | 3341 | 9.4882 | 4.7018  | -0.65217 | 4092 | 9.3842 | 4.7358  | -0.71674 |
| -1.04465 | 3285 | 2.344  | 11.846  | -1.64238 | 3410 | 6.0704 | 8.0496  | -1.21838 |
| 0.835693 | 4131 | 6.4875 | 7.7025  | -1.06807 | 3971 | 13.498 | 0.622   | -0.09401 |
| -0.64007 | 2766 | 1.9884 | 12.2016 | -1.69166 | 3467 | 8.0185 | 6.1015  | -0.92348 |
| -1.35893 | 2389 | 1.9674 | 12.2226 | -1.69457 | 2689 | 5.3923 | 8.7277  | -1.32103 |
| 1.750368 | 2695 | 8.3488 | 5.8412  | -0.81009 | 4892 | 16.128 | 2.008   | 0.304118 |
| -0.53793 | 2413 | 4.2271 | 9.9629  | -1.38137 | 3940 | 9.4924 | 4.6276  | -0.70037 |
| 0.390224 | 2596 | 7.4345 | 6.7555  | -0.93682 | 3517 | 12.283 | 1.837   | -0.27793 |
| -0.22508 | 2748 | 8.5153 | 5.6747  | -0.78702 | 3493 | 13.112 | 1.008   | -0.15244 |
| -0.95776 | 2197 | 7.3737 | 6.8163  | -0.94524 | 2571 | 5.2898 | 8.8302  | -1.33655 |
| 1.084803 | 2527 | 13.732 | 0.458   | -0.06397 | 2802 | 10.992 | 3.128   | -0.47336 |
| 0.226398 | 2632 | 12.31  | 1.88    | -0.26106 | 2513 | 8.5953 | 5.5247  | -0.83617 |
| -0.16104 | 2365 | 8.6258 | 5.5642  | -0.7717  | 2796 | 9.9428 | 4.1772  | -0.63218 |
| 0.465397 | 2927 | 12.231 | 1.959   | -0.27201 | 3390 | 9.2625 | 4.8575  | -0.73517 |
| 2.409485 | 3371 | 21.27  | 7.08    | 0.980824 | 4633 | 21.304 | 7.184   | 1.087651 |
| 1.575697 | 2443 | 17.806 | 3.616   | 0.500703 | 5597 | 14.401 | 0.281   | 0.042689 |
| 1.250974 | 3625 | 17.462 | 3.272   | 0.453024 | 4968 | 19.122 | 5.002   | 0.757344 |
| 1.356627 | 3776 | 21.504 | 7.314   | 1.013257 | 4613 | 17.126 | 3.006   | 0.455194 |
| 0.139502 | 2871 | 16.998 | 2.808   | 0.388712 | 2241 | 13.342 | 0.778   | -0.11762 |
| -1.19661 | 2621 | 8.1267 | 6.0633  | -0.84088 | 2396 | 5.0918 | 9.0282  | -1.36652 |
| -1.23297 | 2276 | 7.2496 | 6.9404  | -0.96245 | 2931 | 9.9625 | 4.1575  | -0.6292  |
| -0.96245 | 6596 | 8.6416 | 5.5484  | -0.76951 | 6669 | 14.515 | 0.395   | 0.059946 |
| -0.1099  | 4336 | 12.2   | 1.99    | -0.27631 | 5338 | 18.247 | 4.127   | 0.624888 |
| -0.6745  | 3785 | 7.9789 | 6.2111  | -0.86136 | 4960 | 12.319 | 1.801   | -0.27248 |
| 0.365753 | 2924 | 9.3365 | 4.8535  | -0.67319 | 3519 | 16.397 | 2.277   | 0.344839 |
| 1.173604 | 3922 | 7.3177 | 6.8723  | -0.95301 | 5226 | 11.806 | 2.314   | -0.35014 |
| 0.280469 | 2654 | 8.3271 | 5.8629  | -0.8131  | 3718 | 15.573 | 1.453   | 0.220104 |
| -0.09261 | 2808 | 5.4131 | 8.7769  | -1.21699 | 5501 | 11.543 | 2.577   | -0.38995 |
| -0.42788 | 2879 | 3.7166 | 10.4734 | -1.45213 | 5010 | 9.5409 | 4.5791  | -0.69302 |
| -0.71715 | 3698 | 8.3288 | 5.8612  | -0.81286 | 4365 | 12.623 | 1.497   | -0.22646 |
| -0.09745 | 2678 | 8.8125 | 5.3775  | -0.74582 | 3858 | 14.438 | 0.318   | 0.04829  |
| -0.73107 | 2907 | 6.5015 | 7.6885  | -1.06613 | 3254 | 5.8082 | 8.3118  | -1.25807 |
| -1.07586 | 2379 | 7.356  | 6.834   | -0.9477  | 2190 | 7.9452 | 6.1748  | -0.93458 |
| -0.4654  | 1838 | 12.514 | 1.676   | -0.23278 | 2114 | 10.88  | 3.24    | -0.49031 |

|          |      |        |        |          |      |        |        |          |
|----------|------|--------|--------|----------|------|--------|--------|----------|
| -0.31359 | 2886 | 8.3853 | 5.8047 | -0.80503 | 2978 | 5.7085 | 8.4115 | -1.27316 |
| -1.26009 | 2678 | 5.6385 | 8.5515 | -1.18575 | 3527 | 6.1242 | 7.9958 | -1.21024 |
| -0.00234 | 2287 | 10.057 | 4.133  | -0.57333 | 3849 | 9.1712 | 4.9488 | -0.74899 |
| -0.86031 | 4313 | 5.0777 | 9.1123 | -1.26348 | 5606 | 6.279  | 7.841  | -1.1868  |
| -0.08309 | 3386 | 6.4973 | 7.6927 | -1.06672 | 3625 | 6.9241 | 7.1959 | -1.08915 |
| -0.93109 | 3219 | 7.8906 | 6.2994 | -0.8736  | 3633 | 4.4041 | 9.7159 | -1.47062 |
| -1.42869 | 4857 | 7.8649 | 6.3251 | -0.87716 | 3919 | 5.4606 | 8.6594 | -1.31069 |
| 0.494997 | 4515 | 5.9801 | 8.2099 | -1.1384  | 5250 | 13.905 | 0.215  | -0.03239 |
| -0.8502  | 4427 | 6.8218 | 7.3682 | -1.02174 | 5364 | 12.136 | 1.984  | -0.30018 |
| -1.01417 | 2986 | 3.148  | 11.042 | -1.53094 | 3969 | 9.0451 | 5.0749 | -0.76808 |
| 0.04865  | 3711 | 10.698 | 3.492  | -0.48449 | 4764 | 17.38  | 3.26   | 0.493644 |
| 0.558301 | 4042 | 10.762 | 3.428  | -0.47562 | 5774 | 20.038 | 5.918  | 0.896006 |
| 0.442244 | 2361 | 15.036 | 0.846  | 0.116773 | 4002 | 13.643 | 0.477  | -0.07206 |
| -0.20925 | 3481 | 10.629 | 3.561  | -0.49405 | 5308 | 15.637 | 1.517  | 0.229792 |
| -0.48489 | 2781 | 12.585 | 1.605  | -0.22294 | 4877 | 15.542 | 1.422  | 0.215411 |
| 0.088508 | 1840 | 8.75   | 5.44   | -0.75449 | 3883 | 17.615 | 3.495  | 0.529217 |
| -0.18581 | 2819 | 26.712 | 12.522 | 1.735101 | 3799 | 21.927 | 7.807  | 1.181959 |
| -0.09261 | 3349 | 13.138 | 1.052  | -0.1463  | 4668 | 18.723 | 4.603  | 0.696944 |
| -0.2705  | 3597 | 23.964 | 9.774  | 1.35422  | 4508 | 23.669 | 9.549  | 1.44566  |
| -0.51683 | 3811 | 20.467 | 6.277  | 0.869526 | 3961 | 16.259 | 2.139  | 0.323949 |
| -0.42906 | 2376 | 11.406 | 2.784  | -0.38636 | 4926 | 12.87  | 1.25   | -0.18907 |
| -0.87159 | 2876 | 9.0403 | 5.1497 | -0.71425 | 3707 | 6.2315 | 7.8885 | -1.19399 |
| -0.85591 | 4082 | 7.9618 | 6.2282 | -0.86373 | 6199 | 12.115 | 2.005  | -0.30336 |
| -0.98047 | 4773 | 14.854 | 0.664  | 0.091547 | 6842 | 13.607 | 0.513  | -0.07751 |
| -0.01407 | 4874 | 18.281 | 4.091  | 0.56654  | 6565 | 18.187 | 4.067  | 0.615806 |
| -0.12324 | 3650 | 15.205 | 1.015  | 0.140197 | 5168 | 10.971 | 3.149  | -0.47654 |
| -0.99249 | 3305 | 15.976 | 1.786  | 0.24706  | 4900 | 11.122 | 2.998  | -0.45368 |
| -1.72288 | 5159 | 8.8777 | 5.3123 | -0.73679 | 6159 | 19.597 | 5.477  | 0.829249 |
| 1.194558 | 5045 | 14.351 | 0.161  | 0.02183  | 5844 | 24.538 | 10.418 | 1.577207 |
| -0.85797 | 5735 | 8.5963 | 5.5937 | -0.77579 | 4829 | 13.17  | 0.95   | -0.14366 |
| -1.66753 | 3775 | 4.4768 | 9.7132 | -1.34676 | 4217 | 7.4223 | 6.6977 | -1.01373 |
| -0.51581 | 3382 | 7.9834 | 6.2066 | -0.86074 | 5509 | 17.553 | 3.433  | 0.519832 |
| -0.90823 | 2678 | 5.6759 | 8.5141 | -1.18056 | 3306 | 8.0157 | 6.1043 | -0.92391 |
| -0.50511 | 3605 | 10.485 | 3.705  | -0.51401 | 5457 | 16.584 | 2.464  | 0.373147 |
| 0.184781 | 3192 | 11.028 | 3.162  | -0.43875 | 4510 | 21.153 | 7.033  | 1.064793 |
| 1.080847 | 2937 | 16.99  | 2.8    | 0.387603 | 4399 | 24.596 | 10.476 | 1.585987 |
| 1.123342 | 3609 | 17.678 | 3.488  | 0.482962 | 3231 | 12.69  | 1.43   | -0.21632 |
| 0.573394 | 3641 | 17.111 | 2.921  | 0.404374 | 4205 | 26.754 | 12.634 | 1.912661 |
| -0.85855 | 1826 | 10.843 | 3.347  | -0.46439 | 2667 | 10.874 | 3.246  | -0.49122 |
| -0.64051 | 4045 | 12.237 | 1.953  | -0.27118 | 5484 | 20.04  | 5.92   | 0.896309 |
| 1.117481 | 3299 | 20.37  | 6.18   | 0.856081 | 4587 | 23.654 | 9.534  | 1.443389 |
| -1.12188 | 3174 | 17.486 | 3.296  | 0.45635  | 4052 | 12.858 | 1.262  | -0.19089 |
| -0.50086 | 2891 | 13.49  | 0.7    | -0.09751 | 5110 | 21.507 | 7.387  | 1.118381 |
| -0.33938 | 3934 | 20.412 | 6.222  | 0.861903 | 5166 | 21.796 | 7.676  | 1.162129 |
| -1.48952 | 3048 | 8.4318 | 5.7582 | -0.79859 | 4372 | 6.8847 | 7.2353 | -1.09511 |
| -0.31652 | 3612 | 10.05  | 4.14   | -0.5743  | 5487 | 16.986 | 2.866  | 0.434001 |
| -0.62497 | 3745 | 12.31  | 1.88   | -0.26106 | 4829 | 13.419 | 0.701  | -0.10596 |

|          |      |        |        |          |      |        |        |          |
|----------|------|--------|--------|----------|------|--------|--------|----------|
| 0.002345 | 4706 | 9.7535 | 4.4365 | -0.6154  | 5512 | 10.559 | 3.561  | -0.53891 |
| 1.285996 | 4187 | 22.235 | 8.045  | 1.114576 | 4058 | 21.168 | 7.048  | 1.067063 |
| -0.10345 | 3969 | 12.346 | 1.844  | -0.25607 | 3795 | 11.542 | 2.578  | -0.3901  |
| 0.589952 | 5290 | 21.682 | 7.492  | 1.037928 | 5001 | 16.637 | 2.517  | 0.38117  |
| -0.51786 | 2790 | 14.91  | 0.72   | 0.099309 | 3087 | 11.014 | 3.106  | -0.47003 |
| 0.571635 | 4097 | 18.379 | 4.189  | 0.580123 | 4356 | 19.467 | 5.347  | 0.80957  |
| 0.397844 | 3384 | 19.09  | 4.9    | 0.67867  | 2707 | 18.36  | 4.24   | 0.641994 |
| 1.547709 | 3825 | 27.634 | 13.444 | 1.862893 | 3818 | 29.387 | 15.267 | 2.311239 |
| 0.124995 | 3374 | 13.485 | 0.705  | -0.0982  | 3550 | 16.479 | 2.359  | 0.357252 |
| 0.226398 | 3497 | 16.242 | 2.052  | 0.283928 | 2925 | 13.231 | 0.889  | -0.13442 |
| 0.41748  | 4141 | 18.305 | 4.115  | 0.569866 | 3058 | 13.767 | 0.353  | -0.05329 |
| 1.567931 | 3508 | 21.009 | 6.819  | 0.944649 | 3902 | 20.964 | 6.844  | 1.036182 |
| -0.59054 | 3543 | 9.7093 | 4.4807 | -0.62152 | 2514 | 8.1941 | 5.9259 | -0.8969  |
| 1.476932 | 3548 | 22.632 | 8.442  | 1.169601 | 3213 | 20.728 | 6.608  | 1.000457 |
| 0.616622 | 4292 | 18.756 | 4.566  | 0.632376 | 5185 | 20.212 | 6.092  | 0.922346 |
| -1.32414 | 4614 | 6.8054 | 7.3846 | -1.02401 | 4267 | 8.2494 | 5.8706 | -0.88853 |
| -0.19841 | 5081 | 19.445 | 5.255  | 0.727874 | 4460 | 13.52  | 0.6    | -0.09068 |
| -0.48283 | 4674 | 14.163 | 0.027  | -0.00423 | 4142 | 13.496 | 0.624  | -0.09431 |
| 2.881916 | 4108 | 18.33  | 4.14   | 0.573331 | 3891 | 20.175 | 6.055  | 0.916745 |
| -0.61017 | 4752 | 11.174 | 3.016  | -0.41851 | 4468 | 7.0949 | 7.0251 | -1.06329 |
| -0.66337 | 3966 | 8.825  | 5.365  | -0.74409 | 3727 | 11.296 | 2.824  | -0.42734 |
| -0.36224 | 4127 | 8.0204 | 6.1696 | -0.85561 | 2496 | 9.8157 | 4.3043 | -0.65142 |
| 0.457484 | 5117 | 13.094 | 1.096  | -0.15239 | 3946 | 14.749 | 0.629  | 0.095368 |
| 0.972703 | 3160 | 11.614 | 2.576  | -0.35753 | 3273 | 14.36  | 0.24   | 0.036482 |
| 1.794475 | 6030 | 26.75  | 12.56  | 1.740368 | 5767 | 26.756 | 12.636 | 1.912964 |
| 0.846243 | 3529 | 15.557 | 1.367  | 0.188985 | 2508 | 19.896 | 5.776  | 0.874511 |
| -1.11264 | 2252 | 10.036 | 4.154  | -0.57624 | 1781 | 7.9169 | 6.2031 | -0.93886 |
| 0.423634 | 3804 | 17.087 | 2.897  | 0.401048 | 3874 | 11.9   | 2.22   | -0.33591 |
| -0.97007 | 3122 | 15.983 | 1.793  | 0.24803  | 4013 | 9.7433 | 4.3767 | -0.66238 |
| 1.171406 | 4315 | 35.782 | 21.592 | 2.99223  | 3512 | 25.513 | 11.393 | 1.724801 |
| -0.79115 | 3780 | 14.894 | 0.704  | 0.097091 | 2838 | 9.0557 | 5.0643 | -0.76647 |
| -1.27725 | 2794 | 9.6278 | 4.5622 | -0.63282 | 2183 | 7.4668 | 6.6532 | -1.007   |
| -0.51976 | 3989 | 22.336 | 8.146  | 1.128575 | 4263 | 17.429 | 3.309  | 0.501061 |
| -0.51507 | 4125 | 19.152 | 4.962  | 0.687263 | 3610 | 9.0582 | 5.0618 | -0.76609 |
| -0.11122 | 3850 | 25.143 | 10.953 | 1.517633 | 3727 | 20.982 | 6.862  | 1.038907 |
| -0.26611 | 4221 | 16.134 | 1.944  | 0.268959 | 4531 | 11.653 | 2.467  | -0.3733  |
| -0.05085 | 3839 | 23.365 | 9.175  | 1.271197 | 4516 | 17.139 | 3.019  | 0.457162 |
| 0.925812 | 3942 | 17.047 | 2.857  | 0.395504 | 5591 | 23.788 | 9.668  | 1.463674 |
| 1.20804  | 5159 | 31.014 | 16.824 | 2.331371 | 5506 | 31.202 | 17.082 | 2.58599  |
| -0.05363 | 5054 | 19.509 | 5.319  | 0.736744 | 5589 | 13.401 | 0.719  | -0.10869 |
| -0.38011 | 4070 | 11.966 | 2.224  | -0.30874 | 5232 | 12.424 | 1.696  | -0.25659 |
| -0.22845 | 4125 | 14.691 | 0.501  | 0.068955 | 5860 | 14.42  | 0.3    | 0.045565 |
| 0.747918 | 4394 | 19.549 | 5.359  | 0.742288 | 4473 | 21.999 | 7.879  | 1.192859 |
| -0.16309 | 4995 | 19.88  | 5.69   | 0.788166 | 5199 | 12.579 | 1.541  | -0.23312 |
| -0.23006 | 4398 | 16.007 | 1.817  | 0.251357 | 3596 | 11.958 | 2.162  | -0.32713 |
| 0.076345 | 4325 | 23.052 | 8.862  | 1.227815 | 4159 | 26.425 | 12.305 | 1.862858 |
| -0.7592  | 2385 | 13.208 | 0.982  | -0.13659 | 2256 | 8.422  | 5.698  | -0.8624  |

|                 |             |               |               |                 |             |               |               |                 |
|-----------------|-------------|---------------|---------------|-----------------|-------------|---------------|---------------|-----------------|
| 1.586981        | 3932        | 28.077        | 13.887        | 1.924294        | 4317        | 24.183        | 10.063        | 1.523468        |
| 0.310069        | 3898        | 18.368        | 4.178         | 0.578598        | 3972        | 14.98         | 0.86          | 0.130336        |
| 0.597865        | 3697        | 24.506        | 10.316        | 1.429343        | 4090        | 16.601        | 2.481         | 0.37572         |
| -0.08235        | 3521        | 18.83         | 4.64          | 0.642633        | 3283        | 9.8995        | 4.2205        | -0.63874        |
| -0.67597        | 3271        | 12.106        | 2.084         | -0.28933        | 3295        | 9.651         | 4.469         | -0.67636        |
| -0.17716        | 3398        | 16.745        | 2.555         | 0.353646        | 4977        | 12.317        | 1.803         | -0.27278        |
| -0.26933        | 4873        | 17.279        | 3.089         | 0.42766         | 3927        | 8.9127        | 5.2073        | -0.78812        |
| -0.75964        | 4467        | 20.215        | 6.025         | 0.834598        | 3651        | 11.531        | 2.589         | -0.39177        |
| -1.01959        | 4694        | 11.951        | 2.239         | -0.31082        | 4622        | 12.008        | 2.112         | -0.31956        |
| 1.603979        | 5167        | 25.431        | 11.241        | 1.557551        | 5418        | 25.083        | 10.963        | 1.659708        |
| 0.088068        | 4807        | 15.394        | 1.204         | 0.166393        | 5433        | 8.9085        | 5.2115        | -0.78876        |
| 0.493972        | 6546        | 20.914        | 6.724         | 0.931481        | 6408        | 26.561        | 12.441        | 1.883445        |
| -0.90119        | 3997        | 14.086        | 0.104         | -0.0149         | 4275        | 7.9298        | 6.1902        | -0.93691        |
| 1.612624        | 6062        | 16.711        | 2.521         | 0.348933        | 6957        | 24.594        | 10.474        | 1.585684        |
| 1.219909        | 4107        | 16.265        | 2.075         | 0.287116        | 3858        | 17.911        | 3.791         | 0.574025        |
| 2.103665        | 5468        | 22.257        | 8.067         | 1.117625        | 6609        | 25.995        | 11.875        | 1.797765        |
| 1.297866        | 7000        | 19.329        | 5.139         | 0.711796        | 6655        | 30.098        | 15.978        | 2.418869        |
| <b>2.138394</b> | <b>4353</b> | <b>22.49</b>  | <b>8.3</b>    | <b>1.14992</b>  | <b>3924</b> | <b>32.441</b> | <b>18.321</b> | <b>2.773548</b> |
| 1.919763        | 5401        | 18.182        | 3.992         | 0.552818        | 4745        | 23.477        | 9.357         | 1.416595        |
| 5.756651        | 4237        | 14.444        | 0.254         | 0.03472         | 4518        | 19.699        | 5.579         | 0.844689        |
| 1.224012        | 2993        | 17.374        | 3.184         | 0.440827        | 2611        | 21.639        | 7.519         | 1.138363        |
| 1.035567        | 3823        | 24.614        | 10.424        | 1.444312        | 4737        | 26.451        | 12.331        | 1.866793        |
| 1.545804        | 3929        | 11.962        | 2.228         | -0.30929        | 3505        | 16.491        | 2.371         | 0.359069        |
| 1.246139        | 3302        | 21.744        | 7.554         | 1.046522        | 2992        | 22.326        | 8.206         | 1.242359        |
| <b>2.098243</b> | <b>4314</b> | <b>29.346</b> | <b>15.156</b> | <b>2.100182</b> | <b>3591</b> | <b>28.209</b> | <b>14.089</b> | <b>2.132916</b> |
| -0.48371        | 5357        | 11.387        | 2.803         | -0.38899        | 4584        | 11.933        | 2.187         | -0.33091        |
| 0.318275        | 4837        | 17.304        | 3.114         | 0.431125        | 5289        | 14.672        | 0.552         | 0.083712        |
| -0.26919        | 4525        | 16.331        | 2.141         | 0.296264        | 4108        | 21.495        | 7.375         | 1.116564        |
| 0.170861        | 4499        | 15.203        | 1.013         | 0.13992         | 4587        | 16.852        | 2.732         | 0.413716        |
| 0.8946          | 5393        | 21.75         | 7.56          | 1.047353        | 6393        | 25.387        | 11.267        | 1.705727        |
| 1.574818        | 6290        | 27.727        | 13.537        | 1.875783        | 4443        | 21.54         | 7.42          | 1.123376        |
| <b>0.954093</b> | <b>6211</b> | <b>29.303</b> | <b>15.113</b> | <b>2.094222</b> | <b>5261</b> | <b>28.265</b> | <b>14.145</b> | <b>2.141393</b> |
| 0.247059        | 3374        | 10.759        | 3.431         | -0.47603        | 4730        | 16.702        | 2.582         | 0.391009        |
| 0.874231        | 6128        | 13.659        | 0.531         | -0.07408        | 4429        | 20.095        | 5.975         | 0.904635        |
| 0.919511        | 4746        | 15.908        | 1.718         | 0.237635        | 5482        | 18.387        | 4.267         | 0.646081        |
| 0.857819        | 4411        | 16.822        | 2.632         | 0.364318        | 4118        | 16.44         | 2.32          | 0.351348        |
| 0.675383        | 5236        | 15.202        | 1.012         | 0.139781        | 5009        | 14.554        | 0.434         | 0.065849        |
| 1.046557        | 3885        | 14.646        | 0.456         | 0.062718        | 3894        | 16.076        | 1.956         | 0.296247        |
| 1.802095        | 3481        | 17.725        | 3.535         | 0.489476        | 3333        | 18.842        | 4.722         | 0.714958        |
| 1.878733        | 4417        | 20.67         | 6.48          | 0.897662        | 3360        | 23.601        | 9.481         | 1.435366        |
| 1.771909        | 4139        | 21.261        | 7.071         | 0.979577        | 2869        | 18.578        | 4.458         | 0.674994        |
| 2.190121        | 5334        | 19.948        | 5.758         | 0.797591        | 3647        | 13.957        | 0.163         | -0.02452        |
| 1.659369        | 4114        | 21.609        | 7.419         | 1.02781         | 3217        | 16.257        | 2.137         | 0.323646        |
| 0.935923        | 3545        | 17.066        | 2.876         | 0.398137        | 3575        | 24.336        | 10.216        | 1.546629        |
| <b>3.125311</b> | <b>4249</b> | <b>29.701</b> | <b>15.511</b> | <b>2.149386</b> | <b>3427</b> | <b>25.328</b> | <b>11.208</b> | <b>1.696796</b> |
| 1.221814        | 5165        | 23.621        | 9.431         | 1.30668         | 2994        | 23.848        | 9.728         | 1.472757        |
| 1.176681        | 4541        | 14.16         | 0.03          | -0.00464        | 2468        | 12.196        | 1.924         | -0.2911         |

|                 |             |               |               |                 |             |               |               |                 |
|-----------------|-------------|---------------|---------------|-----------------|-------------|---------------|---------------|-----------------|
| 2.26207         | 5343        | 19.427        | 5.237         | 0.725379        | 4057        | 16.342        | 2.222         | 0.336513        |
| 1.826127        | 5903        | 25.563        | 11.373        | 1.575847        | 5016        | 25.299        | 11.179        | 1.692406        |
| <b>3.530482</b> | <b>6755</b> | <b>29.474</b> | <b>15.284</b> | <b>2.117923</b> | <b>6586</b> | <b>22.745</b> | <b>8.625</b>  | <b>1.305787</b> |
| 2.12418         | 6403        | 27.503        | 13.313        | 1.844736        | 4208        | 8.3413        | 5.7787        | -0.87462        |
| 1.809275        | 4596        | 17.211        | 3.021         | 0.418234        | 5550        | 20.018        | 5.898         | 0.892979        |
| 1.617167        | 4794        | 20.129        | 5.939         | 0.822678        | 5200        | 14.635        | 0.515         | 0.078111        |
| 1.033809        | 4587        | 16.961        | 2.771         | 0.383584        | 6094        | 20.217        | 6.097         | 0.923103        |
| 0.918192        | 4380        | 26.689        | 12.499        | 1.731914        | 4853        | 14.733        | 0.613         | 0.092946        |
| -0.19987        | 5306        | 13.664        | 0.526         | -0.07339        | 4066        | 8.0177        | 6.1023        | -0.9236         |
| 0.319155        | 5492        | 17.298        | 3.108         | 0.430293        | 4612        | 7.6323        | 6.4877        | -0.98194        |
| 1.383296        | 4794        | 20.505        | 6.315         | 0.874793        | 4287        | 7.9776        | 6.1424        | -0.92967        |
| 2.073332        | 3757        | 17.567        | 3.377         | 0.467577        | 3138        | 13.512        | 0.608         | -0.09189        |
| 1.609987        | 4736        | 19.51         | 5.32          | 0.736883        | 3723        | 10.449        | 3.671         | -0.55556        |
| 1.0659          | 5954        | 14.075        | 0.115         | -0.01642        | 3166        | 14.498        | 0.378         | 0.057372        |
| 0.282228        | 4664        | 22.041        | 7.851         | 1.087687        | 2911        | 15.802        | 1.682         | 0.254769        |
| 0.733997        | 3127        | 13.24         | 0.95          | -0.13216        | 2351        | 9.9532        | 4.1668        | -0.63061        |
| -0.14346        | 4181        | 24.731        | 10.541        | 1.460529        | 3876        | 19.298        | 5.178         | 0.783987        |
| 0.1565          | 4139        | 20.947        | 6.757         | 0.936055        | 2529        | 11.032        | 3.088         | -0.4673         |
| <b>2.417398</b> | <b>6290</b> | <b>36.105</b> | <b>21.915</b> | <b>3.036999</b> | <b>3865</b> | <b>24.373</b> | <b>10.253</b> | <b>1.55223</b>  |
| 1.616288        | 5469        | 22.966        | 8.776         | 1.215895        | 4123        | 19.961        | 5.841         | 0.88435         |
| <b>2.121689</b> | <b>7110</b> | <b>38.847</b> | <b>24.657</b> | <b>3.417049</b> | <b>3658</b> | <b>23.018</b> | <b>8.898</b>  | <b>1.347113</b> |
| 0.121771        | 5259        | 9.5075        | 4.6825        | -0.64949        | 3113        | 4.69          | 9.43          | -1.42734        |
| 0.890643        | 6507        | 28.508        | 14.318        | 1.984032        | 4054        | 11.569        | 2.551         | -0.38601        |
| <b>2.941556</b> | <b>6229</b> | <b>32.156</b> | <b>17.966</b> | <b>2.489656</b> | <b>5716</b> | <b>26.067</b> | <b>11.947</b> | <b>1.808664</b> |
| -0.41411        | 4314        | 11.59         | 2.6           | -0.36085        | 2477        | 9.891         | 4.229         | -0.64003        |
| 1.399855        | 5285        | 18.127        | 3.937         | 0.545195        | 4363        | 12.148        | 1.972         | -0.29837        |
| -0.20119        | 5840        | 7.7568        | 6.4332        | -0.89215        | 3674        | 10.996        | 3.124         | -0.47275        |
| 0.477853        | 3391        | 9.6432        | 4.5468        | -0.63069        | 3181        | 12.575        | 1.545         | -0.23373        |
| -0.22904        | 3145        | 10.079        | 4.111         | -0.57028        | 3100        | 11.839        | 2.281         | -0.34514        |
| -0.55581        | 4949        | 12.346        | 1.844         | -0.25607        | 3842        | 17.126        | 3.006         | 0.455194        |
| <b>2.214006</b> | <b>6649</b> | <b>36.336</b> | <b>22.146</b> | <b>3.069017</b> | <b>3449</b> | <b>44.042</b> | <b>29.922</b> | <b>4.529684</b> |
| -0.69795        | 6983        | 18.302        | 4.112         | 0.56945         | 3380        | 21.834        | 7.714         | 1.167881        |
| 1.153821        | 5139        | 12.96         | 1.23          | -0.17097        | 2744        | 23.652        | 9.532         | 1.443086        |
| -0.222          | 5186        | 15.156        | 0.966         | 0.133405        | 3311        | 17.94         | 3.82          | 0.578415        |
| 0.11547         | 3477        | 11.475        | 2.715         | -0.37679        | 3297        | 25.296        | 11.176        | 1.691952        |
| -0.03898        | 4047        | 9.6615        | 4.5285        | -0.62815        | 2886        | 13.652        | 0.468         | -0.07069        |
| 1.717251        | 3799        | 25.48         | 11.29         | 1.564343        | 2873        | 28.542        | 14.422        | 2.183325        |
| -0.38554        | 4477        | 12.598        | 1.592         | -0.22114        | 2799        | 21.365        | 7.245         | 1.096885        |
| 1.211703        | 5188        | 25.944        | 11.754        | 1.628654        | 2811        | 18.179        | 4.059         | 0.614595        |
| 0.033117        | 5853        | 16.385        | 2.195         | 0.303748        | 2684        | 10.469        | 3.651         | -0.55253        |
| -0.00733        | 5730        | 21.675        | 7.485         | 1.036958        | 3853        | 12.614        | 1.506         | -0.22782        |
| 1.772641        | 5605        | 28.689        | 14.499        | 2.00912         | 4075        | 22.994        | 8.874         | 1.34348         |
| 1.452021        | 5152        | 20.031        | 5.841         | 0.809095        | 3771        | 17.714        | 3.594         | 0.544204        |
| -0.16983        | 6204        | 19.036        | 4.846         | 0.671185        | 3545        | 10.437        | 3.683         | -0.55737        |
| -0.91292        | 5347        | 8.8274        | 5.3626        | -0.74376        | 4388        | 8.9562        | 5.1638        | -0.78153        |
| 0.380113        | 6699        | 18.809        | 4.619         | 0.639722        | 4424        | 13.156        | 0.964         | -0.14578        |
| -0.84375        | 4609        | 6.5524        | 7.6376        | -1.05908        | 3766        | 7.6474        | 6.4726        | -0.97966        |

|                 |             |               |               |                 |             |               |               |                 |
|-----------------|-------------|---------------|---------------|-----------------|-------------|---------------|---------------|-----------------|
| -0.7129         | 4403        | 18.873        | 4.683         | 0.648593        | 3934        | 14.743        | 0.623         | 0.09446         |
| -1.3284         | 4081        | 7.6207        | 6.5693        | -0.91101        | 3074        | 7.0592        | 7.0608        | -1.0687         |
| -1.41562        | 4608        | 7.5521        | 6.6379        | -0.92052        | 3002        | 9.1939        | 4.9261        | -0.74555        |
| -0.46129        | 3923        | 10.502        | 3.688         | -0.51165        | 2760        | 14.855        | 0.735         | 0.111414        |
| 0.215554        | 4844        | 21.305        | 7.115         | 0.985675        | 3138        | 18.642        | 4.522         | 0.684683        |
| <b>2.252545</b> | <b>5953</b> | <b>35.679</b> | <b>21.489</b> | <b>2.977954</b> | <b>3522</b> | <b>29.302</b> | <b>15.182</b> | <b>2.298372</b> |
| -0.5035         | 4795        | 11.512        | 2.678         | -0.37166        | 2594        | 9.4449        | 4.6751        | -0.70756        |
| -0.04015        | 4435        | 13.596        | 0.594         | -0.08282        | 2912        | 14.08         | 0.04          | -0.0059         |
| -0.87042        | 3249        | 9.7876        | 4.4024        | -0.61067        | 2605        | 6.9482        | 7.1718        | -1.0855         |
| -0.75246        | 2410        | 6.3071        | 7.8829        | -1.09308        | 1749        | 9.4911        | 4.6289        | -0.70056        |
| 0.400335        | 3861        | 21.601        | 7.411         | 1.026702        | 2545        | 16.267        | 2.147         | 0.32516         |
| -0.96435        | 5196        | 10.354        | 3.836         | -0.53217        | 3497        | 10.695        | 3.425         | -0.51832        |
| -0.88273        | 5555        | 11.611        | 2.579         | -0.35794        | 2559        | 10.16         | 3.96          | -0.59931        |
| 1.083191        | 4661        | 16.649        | 2.459         | 0.34034         | 3125        | 20.448        | 6.328         | 0.958071        |
| 1.275446        | 6300        | 25.222        | 11.032        | 1.528583        | 5390        | 22.412        | 8.292         | 1.255378        |
| 1.159243        | 4289        | 17.463        | 3.273         | 0.453162        | 4062        | 9.2073        | 4.9127        | -0.74352        |
| 0.103308        | 4821        | 14.644        | 0.454         | 0.062441        | 3063        | 8.0966        | 6.0234        | -0.91166        |
| -0.27754        | 4065        | 11.734        | 2.456         | -0.34089        | 4499        | 6.7571        | 7.3629        | -1.11443        |
| 0.447373        | 4559        | 11.735        | 2.455         | -0.34076        | 3976        | 12.123        | 1.997         | -0.30215        |
| -0.114          | 3421        | 9.734         | 4.456         | -0.6181         | 5143        | 13.125        | 0.995         | -0.15047        |
| 0.467302        | 4914        | 24.522        | 10.332        | 1.431561        | 4421        | 19.52         | 5.4           | 0.817593        |
| -0.99952        | 4730        | 5.1797        | 9.0103        | -1.24934        | 4290        | 10.816        | 3.304         | -0.5            |
| -0.47141        | 3749        | 10.456        | 3.734         | -0.51803        | 2313        | 12.668        | 1.452         | -0.21965        |
| -0.24574        | 3839        | 12.425        | 1.765         | -0.24512        | 2180        | 17.661        | 3.541         | 0.536181        |
| -1.20495        | 3951        | 14.224        | 0.034         | 0.004227        | 1968        | 14.787        | 0.667         | 0.10112         |
| 0.932846        | 3235        | 17.434        | 3.244         | 0.449143        | 2313        | 19.498        | 5.378         | 0.814262        |
| -0.50555        | 2115        | 7.565         | 6.625         | -0.91873        | 1796        | 5.6236        | 8.4964        | -1.28602        |
| -0.05393        | 3044        | 7.1616        | 7.0284        | -0.97464        | 1589        | 10.006        | 4.114         | -0.62262        |
| 0.320913        | 2699        | 12.486        | 1.704         | -0.23666        | 2555        | 16.751        | 2.631         | 0.398427        |
| 1.57643         | 2881        | 20.514        | 6.324         | 0.87604         | 2032        | 31.693        | 17.573        | 2.660317        |
| 0.01905         | 4240        | 21.203        | 7.013         | 0.971538        | 2508        | 19.099        | 4.979         | 0.753862        |
| 0.439314        | 3921        | 10.814        | 3.376         | -0.46841        | 3353        | 22.577        | 8.457         | 1.280355        |
| -0.58204        | 3596        | 11.652        | 2.538         | -0.35226        | 2781        | 7.5872        | 6.5328        | -0.98877        |
| -0.81063        | 4647        | 8.9735        | 5.2165        | -0.72351        | 2739        | 13.91         | 0.21          | -0.03164        |
| 0.463932        | 2723        | 9.1443        | 5.0457        | -0.69983        | 2350        | 17.021        | 2.901         | 0.439299        |
| 1.474295        | 4169        | 30.631        | 16.441        | 2.278287        | 2222        | 15.887        | 1.767         | 0.267636        |
| 0.068432        | 2731        | 8.312         | 5.878         | -0.81519        | 2260        | 10.708        | 3.412         | -0.51635        |
| 0.231526        | 2217        | 7.7582        | 6.4318        | -0.89195        | 2390        | 12.887        | 1.233         | -0.1865         |
| 1.150891        | 2643        | 15.702        | 1.512         | 0.209083        | 2677        | 14.158        | 0.038         | 0.005904        |
|                 | 3848.5      | 14.1935       | 4.8749        |                 | 3971.5      | 14.119        | 4.4635        |                 |
|                 |             |               | 9.7498        |                 |             |               | 8.927         |                 |
|                 |             |               | 14.6247       |                 |             |               | 13.3905       |                 |
|                 |             |               | 7.214852      |                 |             |               | 6.60598       |                 |
| 4755            | 58.17       |               | 5459          | 55.523          |             |               |               |                 |
| 3679            | 50.122      |               | 3898          | 37.712          |             |               |               |                 |
| 2800            | 37.143      |               | 4117          | 41.827          |             |               |               |                 |
| 4459            | 50.819      |               | 4736          | 44.954          |             |               |               |                 |

|          |          |          |          |
|----------|----------|----------|----------|
| 3923.25  | 49.0635  | 4552.5   | 45.004   |
| 875.6302 | 8.74126  | 700.8198 | 7.613988 |
| 2372     | 16.484   | 3621     | 11.102   |
| 2128     | 9.1635   | 2865     | 11.902   |
| 2417     | 15.143   | 2800     | 13.5     |
| 2766     | 12.581   | 3087     | 10.528   |
| 2437     | 12.29583 | 2917.333 | 11.97667 |
| 319.4699 | 2.999933 | 150.487  | 1.487406 |
|          | 0        |          | 22.84196 |
|          | 8.999798 |          | 4.462219 |
|          | 8.999798 |          | 27.30418 |
|          | 36.76767 |          | 33.02733 |
|          | 0.244775 |          | 0.826715 |
|          | 0.755225 |          | 0.173285 |

|      |        |      |        |
|------|--------|------|--------|
| 828  | 3.1401 | 793  | 12.358 |
| 704  | 16.051 | 510  | 18.627 |
| 5870 | 20.102 | 4558 | 23.322 |
| 3834 | 21.127 | 5236 | 13.999 |
| 7130 | 20.491 | 7047 | 33.603 |
| 5486 | 19.96  | 6458 | 32.332 |

y







y

y

y

y

y

y

y

y

y

y

y

|                  |                              |                       | cell ct     | % inf         | AD            |
|------------------|------------------------------|-----------------------|-------------|---------------|---------------|
| 50070 A02        | M-008202- Cdk5 and A         | 91768 CABLES1         | 3088        | 10.848        | 5.732         |
| 50070 A04        | M-019346- zinc finger        | 91752 ZNF804A         | 3887        | 16.285        | 0.295         |
| 50070 A05        | M-015610- potassium          | 115207 KCTD12         | 3000        | 15.933        | 0.647         |
| 50070 A06        | M-030308- lin-52 hom         | 91750 LIN52           | 3315        | 11.192        | 5.388         |
| 50070 A07        | M-008662- OMA1 hor           | 115209 OMA1           | 2102        | 18.316        | 1.736         |
| <b>50070 A08</b> | <b>M-010748- KIAA1919</b>    | <b>91749 KIAA1919</b> | <b>3631</b> | <b>30.102</b> | <b>13.522</b> |
| 50070 A09        | M-015715- DNA-dama           | 115265 DDIT4L         | 2915        | 14.237        | 2.343         |
| 50070 A10        | M-031938- chromoson          | 91748 C14orf43        | 2616        | 15.558        | 1.022         |
| 50070 A11        | M-009144- RAB42, me          | 115273 RAB42          | 2773        | 14.497        | 2.083         |
| 50070 A12        | M-015332- YTH domai          | 91746 YTHDC1          | 1880        | 20.691        | 4.111         |
| 50070 A13        | M-007343- solute carri       | 115286 SLC25A26       | 2350        | 8.8511        | 7.7289        |
| 50070 A14        | M-008463- isopenty           | 91734 IDI2            | 3431        | 8.8021        | 7.7779        |
| 50070 A15        | M-013128- F-box prote        | 115290 FBXO17         | 2372        | 18.002        | 1.422         |
| 50070 A16        | M-016847- similar to C       | 91695 dJ222E13.2      | 2938        | 9.5303        | 7.0497        |
| 50070 A17        | M-015168- protein-L-is       | 115294 PCMTD1         | 3258        | 16.697        | 0.117         |
| 50070 A18        | M-007108- LON peptid         | 91694 LONRF1          | 3003        | 16.284        | 0.296         |
| 50070 A19        | M-018700- leucine rich       | 115353 LRRC42         | 2865        | 13.333        | 3.247         |
| 50070 A20        | M-016704- chromoson          | 91689 C22orf32        | 3535        | 12.277        | 4.303         |
| 50070 A21        | M-018177- guanylate k        | 115361 GBP4           | 3993        | 21.563        | 4.983         |
| 50070 A23        | M-018178- guanylate k        | 115362 GBP5           | 4507        | 18.749        | 2.169         |
| 50070 B02        | M-006319- chromoson          | 133686 C5orf33        | 3938        | 11.757        | 4.823         |
| 50070 B04        | M-018199- proline-rich       | 133619 PRRC1          | 3855        | 28.742        | 12.162        |
| 50070 B05        | M-016564- family with        | 91775 FAM55C          | 4193        | 10.971        | 5.609         |
| 50070 B06        | M-015146- secretoglo         | 92304 SCGB3A1         | 4184        | 20.22         | 3.64          |
| 50070 B07        | M-015514- CHMP fami          | 91782 CHMP7           | 2639        | 15.764        | 0.816         |
| 50070 B08        | M-015112- integrator         | 92105 INTS4           | 2601        | 11.572        | 5.008         |
| 50070 B09        | M-016544- alkB, alkyla       | 91801 ALKBH8          | 4092        | 18.426        | 1.846         |
| 50070 B10        | M-022081- dual specifi       | 92235 DUSP27          | 4008        | 21.507        | 4.927         |
| 50070 B11        | M-022006- chromoson          | 91828 C14orf73        | 2877        | 12.826        | 3.754         |
| 50070 B12        | M-004544- synaptotag         | 94120 SYTL3           | 3098        | 20.239        | 3.659         |
| 50070 B13        | M-021318- WD repeat          | 91833 WDR20           | 3514        | 12.123        | 4.457         |
| 50070 B14        | M-015191- hypothetic         | 94107 MGC14327        | 2561        | 8.7075        | 7.8725        |
| 50070 B15        | M-015779- chordin-like       | 91851 CHRDL1          | 2997        | 17.851        | 1.271         |
| 50070 B16        | M-015090- Thy-1 co-tr        | 94105 LOC94105        | 3549        | 22.147        | 5.567         |
| 50070 B17        | M-031986- calmodulin         | 91860 CALML4          | 5227        | 21.599        | 5.019         |
| 50070 B18        | M-012984- chromoson          | 94104 C21orf66        | 6333        | 34.423        | 17.843        |
| 50070 B19        | M-015143- MARVEL dc          | 91862 MARVELD3        | 5387        | 27.269        | 10.689        |
| 50070 B20        | M-017002- ORM1-like          | 94103 ORMDL3          | 5503        | 13.847        | 2.733         |
| <b>50070 B21</b> | <b>M-018174- RFT1 homc</b>   | <b>91869 RFT1</b>     | <b>5012</b> | <b>40.882</b> | <b>24.302</b> |
| <b>50070 B23</b> | <b>M-015535- tetratricop</b> | <b>91875 TTC5</b>     | <b>5443</b> | <b>38.288</b> | <b>21.708</b> |
| 50070 C02        | M-027536- centromeri         | 91687 CENPL           | 3229        | 6.4416        | 10.1384       |
| 50070 C04        | M-018482- synaptotag         | 91683 SYT12           | 2631        | 9.008         | 7.572         |
| 50070 C05        | M-026730- leucine rich       | 115399 LRRC56         | 4223        | 18.968        | 2.388         |
| 50070 C06        | M-023874- hypothetic         | 91664 LOC91664        | 3971        | 9.8968        | 6.6832        |
| 50070 C07        | M-015612- chromoson          | 115416 C7orf30        | 3750        | 16.24         | 0.34          |
| 50070 C08        | M-018277- myeloid-as         | 91663 MYADM           | 3514        | 19.294        | 2.714         |

|                  |                            |                     |             |               |               |
|------------------|----------------------------|---------------------|-------------|---------------|---------------|
| 50070 C09        | M-015613- zinc finger      | 115509 ZNF689       | 4111        | 18.876        | 2.296         |
| 50070 C10        | M-008413- Boc homolo       | 91653 BOC           | 4056        | 16.297        | 0.283         |
| <b>50070 C11</b> | <b>M-024508- FCH domai</b> | <b>115548 FCHO2</b> | <b>4869</b> | <b>29.883</b> | <b>13.303</b> |
| 50070 C12        | M-017426- ATP syntha       | 91647 ATPAF2        | 3669        | 17.443        | 0.863         |
| 50070 C13        | M-004121- RAC/CDC42        | 115557 GEFT         | 3194        | 13.431        | 3.149         |
| 50070 C14        | M-023635- ES cell asso     | 91646 ECAT8         | 2962        | 24.173        | 7.593         |
| 50070 C15        | M-007118- zinc finger      | 115560 ZNF501       | 3405        | 11.747        | 4.833         |
| 50070 C16        | M-016402- nexilin (F a     | 91624 NEXN          | 3859        | 17.854        | 1.274         |
| 50070 C17        | M-015169- family with      | 115572 FAM46B       | 3365        | 32.214        | 15.634        |
| 50070 C18        | M-016878- DEP domai        | 91614 DEPDC7        | 4851        | 34.343        | 17.763        |
| 50070 C19        | M-007341- solute carri     | 115584 SLC5A11      | 3739        | 13.319        | 3.261         |
| 50070 C20        | M-015463- churchill dc     | 91612 CHURC1        | 5465        | 19.195        | 2.615         |
| 50070 C21        | M-013424- tumor necr       | 115650 TNFRSF13C    | 4407        | 13.342        | 3.238         |
| 50070 C23        | M-021944- tetratricop      | 115669 TTC6         | 5309        | 23.357        | 6.777         |
| 50070 D02        | M-016367- sideroflexir     | 94097 SFXN5         | 4305        | 12.102        | 4.478         |
| 50070 D04        | M-009005- heat shock       | 94086 HSPB9         | 6365        | 19.152        | 2.572         |
| 50070 D05        | M-015249- chromoson        | 91894 C11orf52      | 5626        | 24.369        | 7.789         |
| 50070 D06        | M-010686- sideroflexir     | 94081 SFXN1         | 4860        | 32.778        | 16.198        |
| 50070 D07        | M-015537- T-cell immu      | 91937 TIMD4         | 4785        | 26.228        | 9.648         |
| 50070 D08        | M-027335- leukocyte r      | 94059 LENG9         | 3632        | 18.943        | 2.363         |
| 50070 D09        | M-017758- NDUFA12-l        | 91942 NDUFA12L      | 4007        | 25.206        | 8.626         |
| 50070 D10        | M-017180- synapse as:      | 94056 SYAP1         | 4199        | 22.72         | 6.14          |
| 50070 D11        | M-019366- arrestin do      | 91947 ARRDC4        | 2484        | 7.4879        | 9.0921        |
| 50070 D12        | M-016903- zinc finger      | 94039 ZNF101        | 4413        | 26.558        | 9.978         |
| 50070 D13        | M-030501- hypothetic       | 91948 LOC91948      | 3929        | 23.517        | 6.937         |
| 50070 D14        | M-018442- ferritin mit     | 94033 FTMT          | 2980        | 12.315        | 4.265         |
| 50070 D15        | M-015904- componen         | 91949 COG7          | 3356        | 15.673        | 0.907         |
| 50070 D16        | M-013687- calcium/ca       | 94032 CAMK2N2       | 4767        | 12.482        | 4.098         |
| 50070 D17        | M-018483- chromoson        | 91966 CXorf40A      | 4283        | 8.8022        | 7.7778        |
| 50070 D18        | M-005897- HtrA serine      | 94031 HTRA3         | 4347        | 5.7971        | 10.7829       |
| 50070 D19        | M-015144- zinc finger      | 91975 ZNF300        | 3614        | 9.2418        | 7.3382        |
| 50070 D20        | M-023786- leucine rich     | 94030 LRRC4B        | 5131        | 11.674        | 4.906         |
| 50070 D21        | M-018208- myozenin 3       | 91977 MYOZ3         | 3779        | 10.347        | 6.233         |
| 50070 D23        | M-023892- chromoson        | 91978 C19orf20      | 4282        | 6.5624        | 10.0176       |
| 50070 E02        | M-008344- RAS-like, fa     | 91608 RASL10B       | 3990        | 10.476        | 6.104         |
| 50070 E04        | M-016764- schlafen fa      | 91607 SLFN11        | 4017        | 18.82         | 2.24          |
| 50070 E05        | M-015170- nitric oxide     | 115677 NOSTRIN      | 4020        | 28.234        | 11.654        |
| 50070 E06        | M-015142- coiled-coil      | 91603 CCDC16        | 4276        | 21.749        | 5.169         |
| 50070 E07        | M-009225- sorting nex      | 115703 SNX26        | 3307        | 9.3741        | 7.2059        |
| 50070 E08        | M-018881- plexin A4, E     | 91584 PLXNA4B       | 3851        | 16.022        | 0.558         |
| 50070 E09        | M-015870- chromoson        | 115708 C14orf172    | 3546        | 21.404        | 4.824         |
| 50070 E10        | M-019332- ribosomal        | 91582 RPS19BP1      | 3679        | 15.955        | 0.625         |
| 50070 E11        | M-026975- chromoson        | 115749 C12orf56     | 3952        | 17.738        | 1.158         |
| 50070 E12        | M-016859- chromoson        | 91574 C12orf65      | 3879        | 20.263        | 3.683         |
| 50070 E13        | M-015333- DIS3 mitoti      | 115752 DIS3L        | 2720        | 15.735        | 0.845         |
| 50070 E14        | M-016403- UBX domai        | 91544 UBXD5         | 2445        | 11.411        | 5.169         |
| 50070 E15        | M-018083- ADP-ribosy       | 115761 ARL11        | 3588        | 14.381        | 2.199         |



|           |                        |                 |      |        |         |
|-----------|------------------------|-----------------|------|--------|---------|
| 50070 E16 | M-018357- hypothetical | 91531 DKFZp434F | 2746 | 11.799 | 4.781   |
| 50070 E17 | M-018367- chromosom    | 115795 C3orf24  | 3019 | 13.647 | 2.933   |
| 50070 E18 | M-015710- ankyrin rep  | 91526 ANKRD44   | 3918 | 14.395 | 2.185   |
| 50070 E19 | M-015615- IQ motif co  | 115811 IQCD     | 4933 | 17.819 | 1.239   |
| 50070 E20 | M-015532- family with  | 91523 FAM113B   | 3790 | 7.3087 | 9.2713  |
| 50070 E21 | M-008577- dehydroge    | 115817 DHRS1    | 2416 | 3.0215 | 13.5585 |
| 50070 E23 | M-006860- WD repeat    | 115825 WDFY2    | 5600 | 17.571 | 0.991   |
| 50070 F02 | M-010685- tweety hor   | 94015 TTYH2     | 4674 | 7.9589 | 8.6211  |
| 50070 F04 | M-016780- serine hydr  | 94009 SERHL     | 4902 | 29.886 | 13.306  |
| 50070 F05 | M-017087- family with  | 92002 FAM58A    | 5069 | 14.263 | 2.317   |
| 50070 F06 | M-013702- phosphatid   | 94005 PIGS      | 4703 | 13.289 | 3.291   |
| 50070 F07 | M-007358- mitochond    | 92014 MCART1    | 5045 | 19.722 | 3.142   |
| 50070 F08 | M-017220- ATPase inh   | 93974 ATPIF1    | 3036 | 17.194 | 0.614   |
| 50070 F09 | M-030590- similar to R | 92017 LOC92017  | 4617 | 26.099 | 9.519   |
| 50070 F10 | M-018078- Ca2+-depe    | 93664 CADPS2    | 3361 | 10.622 | 5.958   |
| 50070 F11 | M-015145- hypothetical | 92070 MGC21675  | 4398 | 16.712 | 0.132   |
| 50070 F12 | M-015110- Rho GTPas    | 93663 ARHGAP18  | 3209 | 12.808 | 3.772   |
| 50070 F13 | M-005887- gamma-glu    | 92086 GGTLA4    | 4021 | 18.677 | 2.097   |
| 50070 F14 | M-013732- capping pr   | 93661 CAPZA3    | 3461 | 28.633 | 12.053  |
| 50070 F15 | M-015250- zinc finger  | 92092 ZC3HAV1L  | 3889 | 28.079 | 11.499  |
| 50070 F16 | M-015236- tight juncti | 93643 TJAP1     | 2753 | 14.384 | 2.196   |
| 50070 F17 | M-016833- tetratricop  | 92104 TTC30A    | 3529 | 13.347 | 3.233   |
| 50070 F18 | M-024154- transcrip    | 93624 MGC21874  | 3887 | 10.188 | 6.392   |
| 50070 F19 | M-010186- oxidoreduc   | 92106 OXNAD1    | 4931 | 24.092 | 7.512   |
| 50070 F20 | M-015093- Mof4 famil   | 93621 MRFAP1    | 5291 | 28.067 | 11.487  |
| 50070 F21 | M-008886- dermatan s   | 92126 DSEL      | 4603 | 13.122 | 3.458   |
| 50070 F23 | M-024787- hypothetical | 92129 RP11-321G | 3209 | 14.927 | 1.653   |
| 50070 G02 | M-010684- collagen, ty | 91522 COL23A1   | 6606 | 14.033 | 2.547   |
| 50070 G04 | M-031465- intestine-s  | 91464 ISX       | 4215 | 14.069 | 2.511   |
| 50070 G05 | M-008520- RAB3C, me    | 115827 RAB3C    | 4577 | 14.027 | 2.553   |
| 50070 G06 | M-005341- hypothetical | 91461 LOC91461  | 4098 | 25.842 | 9.262   |
| 50070 G07 | M-015489- thioredoxir  | 115861 TXNL6    | 2779 | 8.1684 | 8.4116  |
| 50070 G08 | M-007107- ring finger  | 91445 RNF185    | 4873 | 14.262 | 2.318   |
| 50070 G09 | M-015487- collagen tri | 115908 CTHRC1   | 3781 | 13.859 | 2.721   |
| 50070 G10 | M-016958- chromosom    | 91442 C19orf40  | 4289 | 32.618 | 16.038  |
| 50070 G11 | M-030773- chromosom    | 115939 C16orf42 | 4626 | 25.984 | 9.404   |
| 50070 G12 | M-016382- prematurel   | 91431 LOC91431  | 4111 | 22.403 | 5.823   |
| 50070 G13 | M-016210- hypothetical | 115948 MGC20983 | 3143 | 15.017 | 1.563   |
| 50070 G14 | M-015098- XRCC6 binc   | 91419 XRCC6BP1  | 3034 | 11.668 | 4.912   |
| 50070 G15 | M-016539- zinc finger  | 115950 ZNF653   | 2692 | 25.111 | 8.531   |
| 50070 G16 | M-022933- coiled-coil  | 91409 CCDC74B   | 3635 | 10.316 | 6.264   |
| 50070 G17 | M-007119- ring finger  | 115992 RNF166   | 3182 | 11.565 | 5.015   |
| 50070 G18 | M-027988- basic trans  | 91408 BTF3L4    | 3847 | 15.025 | 1.555   |
| 50070 G19 | M-015684- chromosom    | 116028 C16orf75 | 4756 | 21.068 | 4.488   |
| 50070 G20 | M-018379- SEC14 and    | 91404 SESTD1    | 4570 | 21.685 | 5.105   |
| 50070 G21 | M-015183- odd-skippe   | 116039 OSR2     | 3769 | 15.15  | 1.43    |
| 50070 G23 | M-023580- leucine ric  | 116064 LRRC58   | 3280 | 10.945 | 5.635   |

|                  |                             |                       |             |               |               |
|------------------|-----------------------------|-----------------------|-------------|---------------|---------------|
| 50070 H02        | M-019201- F-box prote       | 93611 FBXO44          | 3945        | 7.3764        | 9.2036        |
| 50070 H04        | M-015606- WD repeat         | 93594 WDR67           | 3093        | 20.757        | 4.177         |
| <b>50070 H05</b> | <b>M-018531- metadherin</b> | <b>92140 MTDH</b>     | <b>3245</b> | <b>33.867</b> | <b>17.287</b> |
| 50070 H06        | M-021481- calcium cha       | 93589 CACNA2D4        | 3973        | 13.466        | 3.114         |
| 50070 H07        | M-022582- actin-bundl       | 92154 ABBA-1          | 3964        | 25.732        | 9.152         |
| 50070 H08        | M-015453- RNA (guani        | 93587 RG9MTD2         | 3385        | 10.812        | 5.768         |
| 50070 H09        | M-031924- transmembr        | 92162 TMEM88          | 2899        | 13.211        | 3.369         |
| 50070 H10        | M-028197- chromosom         | 93556 C3orf50         | 3224        | 18.734        | 2.154         |
| 50070 H11        | M-015522- mitochond         | 92170 MTG1            | 2976        | 10.988        | 5.592         |
| 50070 H12        | M-017760- AN1, ubiqu        | 93550 ANUBL1          | 2633        | 17.812        | 1.232         |
| 50070 H13        | M-013677- protocadhe        | 92211 PCDH21          | 2839        | 21.839        | 5.259         |
| 50070 H14        | M-009097- NAD(P) dep        | 93517 HSPC105         | 3170        | 18.36         | 1.78          |
| 50070 H15        | M-023470- hypothetic        | 92216 DKFZp434E       | 4021        | 18.105        | 1.525         |
| 50070 H16        | M-016369- chromosom         | 93487 C14orf32        | 4192        | 16.412        | 0.168         |
| 50070 H17        | M-018175- RCSD doma         | 92241 RCSD1           | 3833        | 23.663        | 7.083         |
| 50070 H18        | M-015089- zinc finger       | 93474 ZNF670          | 3573        | 21.411        | 4.831         |
| 50070 H19        | M-024491- LMBR1 dor         | 92255 LMBRD2          | 4392        | 24.636        | 8.056         |
| 50070 H20        | M-027963- hypothetic        | 93463 LOC93463        | 4772        | 33.759        | 17.179        |
| 50070 H21        | M-019052- mitochond         | 92259 MRPS36          | 3724        | 20.784        | 4.204         |
| 50070 H23        | M-024517- hypothetic        | 92270 LOC92270        | 3858        | 8.2167        | 8.3633        |
| 50070 I02        | M-016515- zinc finger       | 91392 ZNF502          | 3249        | 14.281        | 2.299         |
| 50070 I04        | M-026040- UDP-N-act         | 91373 UAP1L1          | 3855        | 16.576        | 0.004         |
| 50070 I05        | M-024521- LysM, puta        | 116068 LYSMD3         | 2805        | 26.845        | 10.265        |
| 50070 I06        | M-015141- ankyrin rep       | 91369 ANKRD40         | 4361        | 24.123        | 7.543         |
| 50070 I07        | M-016830- basic leucir      | 116071 BATF2          | 3070        | 10.358        | 6.222         |
| 50070 I08        | M-015248- similar to R      | 91368 MGC13017        | 2223        | 20.738        | 4.158         |
| 50070 I09        | M-015172- disrupted in      | 116093 DIRC1          | 2716        | 15.059        | 1.521         |
| 50070 I10        | M-019004- low density       | 91355 LRP5L           | 2970        | 11.616        | 4.964         |
| 50070 I11        | M-008255- forkhead b        | 116113 FOXP4          | 2112        | 10.275        | 6.305         |
| <b>50070 I12</b> | <b>M-024102- hypothetic</b> | <b>91351 FLJ31033</b> | <b>2619</b> | <b>32.073</b> | <b>15.493</b> |
| 50070 I13        | M-023716- zinc finger       | 116115 ZNF526         | 2666        | 22.693        | 6.113         |
| 50070 I14        | M-032237- Der1-like d       | 91319 DERL3           | 3972        | 19.587        | 3.007         |
| 50070 I15        | M-008380- flavin-cont       | 116123 RP11-45J1f     | 3067        | 13.89         | 2.69          |
| 50070 I16        | M-015077- chromosom         | 91304 C19orf6         | 3478        | 17.108        | 0.528         |
| 50070 I17        | M-015173- leucine rich      | 116135 LRRC3B         | 2982        | 21.932        | 5.352         |
| 50070 I18        | M-016549- chromosom         | 91300 C19orf22        | 2707        | 14.777        | 1.803         |
| 50070 I19        | M-012978- kelch doma        | 116138 KLHDC3         | 4096        | 33.13         | 16.55         |
| 50070 I20        | M-015085- transmembr        | 91289 TMEM112f        | 3555        | 22.982        | 6.402         |
| 50070 I21        | M-008669- monad             | 116143 LOC116143      | 4165        | 29.892        | 13.312        |
| 50070 I23        | M-015622- nuclear unc       | 116150 NUS1           | 2923        | 19.535        | 2.955         |
| 50070 J02        | M-028862- maltase-glu       | 93432 LOC93432        | 4083        | 27.945        | 11.365        |
| 50070 J04        | M-031128- hypothetic        | 93429 DKFZp434J       | 3491        | 16.213        | 0.367         |
| 50070 J05        | M-016843- zinc finger       | 92285 ZNF585B         | 4014        | 25.561        | 8.981         |
| 50070 J06        | M-015298- synaptoner        | 93426 SYCE1           | 3815        | 15.99         | 0.59          |
| 50070 J07        | M-005803- calpain 13        | 92291 CAPN13          | 4735        | 23.21         | 6.63          |
| 50070 J08        | M-015564- myosin ligh       | 93408 MYLC2PL         | 4511        | 13.146        | 3.434         |
| 50070 J09        | M-010292- glycine-N-a       | 92292 GLYATL1         | 3664        | 31.386        | 14.806        |

|           |                        |                  |      |        |        |
|-----------|------------------------|------------------|------|--------|--------|
| 50070 J10 | M-015075- transmemk    | 93377 TMEM10     | 3947 | 12.567 | 4.013  |
| 50070 J11 | M-027086- transmemk    | 92293 TMEM132C   | 4775 | 26.283 | 9.703  |
| 50070 J12 | M-016195- hypothetic   | 93349 LOC93349   | 2912 | 12.946 | 3.634  |
| 50070 J13 | M-015539- transmemk    | 92305 TMEM129    | 4248 | 20.88  | 4.3    |
| 50070 J14 | M-015563- family with  | 93343 FAM125A    | 3680 | 8.4239 | 8.1561 |
| 50070 J15 | M-022355- MEX3A pro    | 92312 MEX3A      | 6011 | 33.239 | 16.659 |
| 50070 J16 | M-031247- sarcoma ar   | 93323 NY-SAR-48  | 3695 | 15.101 | 1.479  |
| 50070 J17 | M-015087- chromoson    | 92342 C1orf156   | 4749 | 11.96  | 4.62   |
| 50070 J18 | M-021840- LEM domai    | 93273 LEMD1      | 5296 | 24.094 | 7.514  |
| 50070 J19 | M-016142- SCY1-like 1  | 92344 SCYL1BP1   | 5273 | 24.844 | 8.264  |
| 50070 J20 | M-016370- coiled-coil  | 93233 CCDC114    | 4940 | 17.146 | 0.566  |
| 50070 J21 | M-015540- hypothetic   | 92345 LOC92345   | 4253 | 8.6527 | 7.9273 |
| 50070 J23 | M-018714- chromoson    | 92346 C1orf105   | 3335 | 16.312 | 0.268  |
| 50070 K02 | M-015247- chromoson    | 91283 C9orf30    | 4898 | 14.598 | 1.982  |
| 50070 K04 | M-015526- family with  | 91272 FAM44B     | 4216 | 14.16  | 2.42   |
| 50070 K05 | M-015272- chromoson    | 116151 C20orf108 | 5350 | 14.935 | 1.645  |
| 50070 K06 | M-007568- solute carri | 91252 SLC39A13   | 5887 | 16.12  | 0.46   |
| 50070 K07 | M-019242- phosphata:   | 116154 PHACTR3   | 5088 | 21.403 | 4.823  |
| 50070 K08 | M-018475- gamma-glu    | 91227 GGTL4      | 4749 | 11.687 | 4.893  |
| 50070 K09 | M-015174- cysteine/ty  | 116159 CYR1      | 4315 | 16.593 | 0.013  |
| 50070 K10 | M-013362- hypothetic   | 91219 LOC91219   | 4022 | 22.974 | 6.394  |
| 50070 K11 | M-010751- CKLF-like N  | 116173 CMTM5     | 3153 | 21.059 | 4.479  |
| 50070 K12 | M-022339- nucleopori   | 91181 NUP210L    | 4153 | 25.957 | 9.377  |
| 50070 K13 | M-008606- transglutar  | 116179 TGM7      | 2979 | 9.6677 | 6.9123 |
| 50070 K14 | M-018250- eEF1A2 bin   | 91156 DKFZp434E  | 4621 | 16.966 | 0.386  |
| 50070 K15 | M-015623- transmemk    | 116211 TM4SF19   | 3753 | 25.793 | 9.213  |
| 50070 K16 | M-017443- tigger trans | 91151 TIGD7      | 4807 | 23.32  | 6.74   |
| 50070 K17 | M-015499- family with  | 116224 FAM122A   | 3648 | 10.389 | 6.191  |
| 50070 K18 | M-016511- transmemk    | 91147 TMEM67     | 3616 | 16.565 | 0.015  |
| 50070 K19 | M-021402- zinc finger, | 116225 ZMYND19   | 4637 | 17.102 | 0.522  |
| 50070 K20 | M-007353- solute carri | 91137 SLC25A46   | 5328 | 25.113 | 8.533  |
| 50070 K21 | M-021429- family with  | 116228 FAM36A    | 3330 | 15.015 | 1.565  |
| 50070 K23 | M-023290- hypothetic   | 116236 LOC116236 | 3775 | 10.808 | 5.772  |
| 50070 L02 | M-017912- per1-like d  | 93210 PERLD1     | 6159 | 33.236 | 16.656 |
| 50070 L04 | M-016852- chromoson    | 93190 C1orf158   | 4756 | 13.373 | 3.207  |
| 50070 L05 | M-017271- crumbs ho    | 92359 CRB3       | 5413 | 11.454 | 5.126  |
| 50070 L06 | M-015148- immunoglc    | 93185 IGSF8      | 5125 | 15.278 | 1.302  |
| 50070 L07 | M-015283- splA/ryano   | 92369 SPSB4      | 5213 | 11.855 | 4.725  |
| 50070 L08 | M-017388- phosphatid   | 93183 PIGM       | 4369 | 17.601 | 1.021  |
| 50070 L09 | M-008557- acid phospl  | 92370 ACPL2      | 6788 | 30.701 | 14.121 |
| 50070 L10 | M-015212- olfactomec   | 93145 OLFM2      | 4698 | 15.858 | 0.722  |
| 50070 L11 | M-015691- zinc finger  | 92379 ZFP62      | 6120 | 25.114 | 8.534  |
| 50070 L12 | M-015888- zinc finger  | 93134 ZNF561     | 5232 | 34.518 | 17.938 |
| 50070 L13 | M-016545- mitochond    | 92399 MRRF       | 4602 | 22.599 | 6.019  |
| 50070 L14 | M-015896- transmemk    | 93129 TMEM142C   | 4706 | 24.139 | 7.559  |
| 50070 L15 | M-015074- RNA bindin   | 92400 RBM18      | 5681 | 28.182 | 11.602 |
| 50070 L16 | M-015550- transmemk    | 93109 TMEM44     | 6597 | 22.237 | 5.657  |

|                  |                              |                      |             |               |               |
|------------------|------------------------------|----------------------|-------------|---------------|---------------|
| 50070 L17        | M-015932- chromatin          | 92421 CHMP4C         | 5501        | 19.687        | 3.107         |
| 50070 L18        | M-006231- potassium          | 93107 KCNG4          | 6073        | 27.499        | 10.919        |
| 50070 L19        | M-015189- proline rich       | 92454 PRR8           | 5797        | 17.561        | 0.981         |
| 50070 L20        | M-016912- nicotinate         | 93100 NAPRT1         | 4187        | 20.97         | 4.39          |
| 50070 L21        | M-029657- hypothetic         | 92482 LOC92482       | 5022        | 17.583        | 1.003         |
| 50070 L23        | M-008908- lactate deh        | 92483 LDHAL6B        | 5846        | 24.803        | 8.223         |
| 50070 M02        | M-008540- l(3)mbt-like       | 91133 L3MBTL4        | 6561        | 26.658        | 10.078        |
| 50070 M04        | M-023998- zinc finger        | 91115 ZNF506         | 5386        | 26.457        | 9.877         |
| 50070 M05        | M-015483- TLC domair         | 116238 TLC1          | 5478        | 17.233        | 0.653         |
| 50070 M06        | M-007106- tripartite r       | 91107 TRIM47         | 5829        | 13.965        | 2.615         |
| 50070 M07        | M-016569- chromoson          | 116254 C6orf72       | 5859        | 28.52         | 11.94         |
| 50070 M08        | M-008466- ankyrin rep        | 91074 ANKRD30A       | 4579        | 26.294        | 9.714         |
| 50070 M09        | M-010062- monoacylg          | 116255 MOGAT1        | 5190        | 10.154        | 6.426         |
| 50070 M10        | M-015246- coiled-coil        | 91057 CCDC34         | 4984        | 20.104        | 3.524         |
| <b>50070 M11</b> | <b>M-004896- acyl-CoA sy</b> | <b>116285 ACSM1</b>  | <b>3715</b> | <b>26.729</b> | <b>10.149</b> |
| 50070 M12        | M-015530- DKFZp761E          | 91056 DKFZp761E      | 3242        | 12.523        | 4.057         |
| 50070 M13        | M-015175- chromoson          | 116328 C8orf34       | 4476        | 16.309        | 0.271         |
| 50070 M14        | M-018356- hypothetic         | 91050 DKFZp761E      | 4266        | 21.753        | 5.173         |
| 50070 M15        | M-015176- pannexin 3         | 116337 PANX3         | 5166        | 9.4077        | 7.1723        |
| 50070 M16        | M-005856- dipeptidyl-        | 91039 DPP9           | 5957        | 18.751        | 2.171         |
| 50070 M17        | M-028370- hypothetic         | 116349 LOC116349     | 4121        | 19.801        | 3.221         |
| 50070 M18        | M-016077- LAG1 homc          | 91012 LASS5          | 4867        | 14.732        | 1.848         |
| 50070 M19        | M-008654- retinol binc       | 116362 RBP7          | 5350        | 11.869        | 4.711         |
| 50070 M20        | M-019007- formin-like        | 91010 FMNL3          | 4700        | 14.851        | 1.729         |
| 50070 M21        | M-007496- solute carri       | 116369 SLC26A8       | 3600        | 12.194        | 4.386         |
| 50070 M23        | M-016303- LY6/PLAUR          | 116372 LYPD1         | 5992        | 19.009        | 2.429         |
| 50070 N02        | M-019416- dermokine          | 93099 DMKN           | 4697        | 13.498        | 3.082         |
| 50070 N04        | M-016562- chromoson          | 93081 C13orf27       | 3170        | 17.35         | 0.77          |
| 50070 N05        | M-015803- sperm anti         | 92521 SPECC1         | 5448        | 21.366        | 4.786         |
| 50070 N06        | M-018734- coenzyme           | 93058 COQ10A         | 5202        | 16.763        | 0.183         |
| 50070 N07        | M-027129- coiled-coil        | 92558 CCDC64         | 4758        | 12.085        | 4.495         |
| 50070 N08        | M-018509- polycystic k       | 93035 PKHD1L1        | 4174        | 9.7748        | 6.8052        |
| 50070 N09        | M-015776- fibronectin        | 92565 FANK1          | 3549        | 5.41          | 11.17         |
| 50070 N10        | M-009865- 5'-nucleoti        | 93034 NT5C1B         | 5194        | 11.417        | 5.163         |
| 50070 N11        | M-013061- ankyrin rep        | 92591 ASB16          | 3728        | 11.803        | 4.777         |
| 50070 N12        | M-015841- UDP-GlcNA          | 93010 B3GNT7         | 4761        | 18.925        | 2.345         |
| 50070 N13        | M-007109- zinc finger        | 92595 ZNF764         | 3267        | 16.253        | 0.327         |
| 50070 N14        | M-016531- zinc finger        | 92999 ZBTB47         | 3858        | 7.5428        | 9.0372        |
| <b>50070 N15</b> | <b>M-018359- MOB1, Mp</b>    | <b>92597 MOBKL1A</b> | <b>4477</b> | <b>29.663</b> | <b>13.083</b> |
| 50070 N16        | M-015561- membrane           | 92979 MARCH9         | 3761        | 20.5          | 3.92          |
| 50070 N17        | M-015147- TRAF-inter         | 92610 TIFA           | 3730        | 21.448        | 4.868         |
| 50070 N18        | M-015251- peroxisoma         | 92960 PEX11G         | 2865        | 21.745        | 5.165         |
| 50070 N19        | M-030821- hypothetic         | 92659 LOC92659       | 4397        | 14.146        | 2.434         |
| 50070 N20        | M-015560- methionyl-         | 92935 MARS2          | 3359        | 10.182        | 6.398         |
| 50070 N21        | M-017150- chromoson          | 92667 C20orf72       | 4542        | 18.098        | 1.518         |
| 50070 N23        | M-019009- D-tyrosyl-tl       | 92675 DTD1           | 4206        | 15.359        | 1.221         |
| 50070 O02        | M-008579- cAMP respo         | 90993 CREB3L1        | 3682        | 6.5182        | 10.0618       |

|           |                        |                  |        |          |         |
|-----------|------------------------|------------------|--------|----------|---------|
| 50070 O04 | M-025858- zinc finger  | 90987 ZNF251     | 4837   | 18.131   | 1.551   |
| 50070 O05 | M-023837- hypothetical | 116412 LOC116412 | 2989   | 15.657   | 0.923   |
| 50070 O06 | M-015603- DEAH (Asp-   | 90957 DHX57      | 4059   | 25.696   | 9.116   |
| 50070 O07 | M-016540- transmembr   | 116441 TM4SF18   | 4075   | 17.055   | 0.475   |
| 50070 O08 | M-016663- endothelial  | 90952 ESAM       | 4609   | 24.083   | 7.503   |
| 50070 O09 | M-008558- RAB39B, m    | 116442 RAB39B    | 4990   | 19.639   | 3.059   |
| 50070 O10 | M-007105- tripartite m | 90933 TRIM41     | 3547   | 18.664   | 2.084   |
| 50070 O11 | M-007918- glutamate    | 116444 GRIN3B    | 3411   | 24.186   | 7.606   |
| 50070 O12 | M-027619- zinc finger  | 90874 ZNF697     | 2765   | 7.4503   | 9.1297  |
| 50070 O13 | M-031788- oligodendr   | 116448 OLIG1     | 2861   | 10.94    | 5.64    |
| 50070 O14 | M-029533- chromosom    | 90871 C9orf123   | 2199   | 7.7763   | 8.8037  |
| 50070 O15 | M-015193- hypothetical | 114130 MGC16384  | 4406   | 20.132   | 3.552   |
| 50070 O16 | M-029232- similar to T | 90868 COE2       | 5842   | 24.101   | 7.521   |
| 50070 O17 | M-015149- hypothetical | 112597 MGC4677   | 3172   | 14.912   | 1.668   |
| 50070 O18 | M-015122- interleukin  | 90865 IL33       | 2944   | 20.686   | 4.106   |
| 50070 O19 | M-017735- tuberoinfu   | 113091 TIP39     | 3155   | 8.5261   | 8.0539  |
| 50070 O20 | M-017713- splA/ryano   | 90864 SPSB3      | 3393   | 13.911   | 2.669   |
| 50070 O21 | M-008421- UDP glycos   | 133688 UGT3A1    | 4196   | 9.5567   | 7.0233  |
| 50070 O23 | M-016007- calcyphosir  | 133690 CAPSL     | 2564   | 11.193   | 5.387   |
| 50070 P02 | M-015088- coiled-coil  | 92922 CCDC102A   | 2831   | 9.6079   | 6.9721  |
| 50070 P04 | M-008326- ubiquitin-ci | 92912 UBE2Q2     | 3579   | 12.35    | 4.23    |
| 50070 P05 | M-015552- family with  | 92689 FAM114A1   | 3848   | 10.785   | 5.795   |
| 50070 P06 | M-016347- heterogene   | 92906 HNRPLL     | 4248   | 18.079   | 1.499   |
| 50070 P07 | M-018989- transmembr   | 92691 TMEM169    | 3753   | 15.055   | 1.525   |
| 50070 P08 | M-015116- IMP4, U3 s   | 92856 IMP4       | 3824   | 9.3619   | 7.2181  |
| 50070 P09 | M-018685- transmembr   | 92703 TMEM183/   | 3035   | 15.453   | 1.127   |
| 50070 P10 | M-015555- receptor ac  | 92840 REEP6      | 3576   | 18.96    | 2.38    |
| 50070 P11 | M-015918- arrestin do  | 92714 ARRDC1     | 2350   | 21.362   | 4.782   |
| 50070 P12 | M-015702- zinc finger  | 92822 ZNF276     | 3548   | 13.698   | 2.882   |
| 50070 P13 | M-016561- WD repeat    | 92715 WDR85      | 3956   | 14.737   | 1.843   |
| 50070 P14 | M-019163- histone clu  | 92815 HIST3H2A   | 4432   | 19.63    | 3.05    |
| 50070 P15 | M-018429- otopetrin 2  | 92736 OTOP2      | 3851   | 11.192   | 5.388   |
| 50070 P16 | M-016551- hypothetical | 92806 MGC16385   | 3863   | 15.506   | 1.074   |
| 50070 P17 | M-018708- delta/notch  | 92737 DNER       | 3968   | 10.837   | 5.743   |
| 50070 P18 | M-015553- SH3KBP1 b    | 92799 SHKBP1     | 4044   | 19.585   | 3.005   |
| 50070 P19 | M-007562- solute carri | 92745 SLC38A5    | 3738   | 7.6779   | 8.9021  |
| 50070 P20 | M-013541- helicase (D  | 92797 HELB       | 5279   | 21.86    | 5.28    |
| 50070 P21 | M-010095- chromosom    | 92747 C20orf114  | 3739   | 9.4678   | 7.1122  |
| 50070 P23 | M-016558- chromosom    | 92749 C2orf39    | 3499   | 15.519   | 1.061   |
|           |                        | MAD              | 3946   | 16.5845  | 4.7815  |
|           |                        | MAD3             |        |          | 14.3445 |
|           |                        | MADc             |        |          | 7.07662 |
| 50070 C22 |                        |                  | 4701   | 53.967   |         |
| 50070 D22 |                        |                  | 4654   | 51.955   |         |
| 50070 E22 |                        |                  | 2667   | 34.346   |         |
| 50070 F22 |                        |                  | 3328   | 54.387   |         |
|           |                        | mn               | 3837.5 | 48.66375 |         |

|           |  |           |          |          |
|-----------|--|-----------|----------|----------|
|           |  | sd        | 1006.97  | 9.603998 |
| 50070 G22 |  |           | 1196     | 12.207   |
| 50070 H22 |  |           | 1664     | 10.938   |
| 50070 I22 |  |           | 1121     | 12.578   |
| 50070 J22 |  |           | 2218     | 11.587   |
|           |  | mn        | 1667.667 | 11.701   |
|           |  | sd        | 548.5092 | 0.825922 |
|           |  | 3psSD     |          | 28.81199 |
|           |  | 3ngSD     |          | 2.477766 |
|           |  | SumSD     |          | 31.28976 |
|           |  | DiffMn    |          | 36.96275 |
|           |  | SmovrDiff |          | 0.846521 |
|           |  | 1minus    |          | 0.153479 |

|           |                                   |                |      |        |
|-----------|-----------------------------------|----------------|------|--------|
| 50070 G03 | M-003290- polo-like ki            | 5347 PLK1 SMAR | 688  | 10.029 |
| 50070 H03 | M-003290- polo-like ki            | 5347 PLK1 SMAR | 415  | 9.1566 |
| 50070 I03 | D-001206- siControl non-targeting |                | 3717 | 20.285 |
| 50070 J03 | D-001206- siControl non-targeting |                | 3787 | 19.039 |
| 50070 K03 | D-001600- (siGLO RISC-free siRNA  |                | 6110 | 26.727 |
| 50070 L03 | D-001600- (siGLO RISC-free siRNA  |                | 6344 | 28.121 |

| rZ              | cell ct     | % inf         | AD            | rZ              | cell ct     | % inf         | AD            | rZ              |
|-----------------|-------------|---------------|---------------|-----------------|-------------|---------------|---------------|-----------------|
| -0.81063        | 1696        | 8.3726        | 2.6974        | -0.55951        | 3167        | 7.0098        | 5.1802        | -0.97459        |
| -0.04232        | 2766        | 14.317        | 3.247         | 0.67443         | 4343        | 10.937        | 1.253         | -0.23638        |
| -0.09206        | 2113        | 12.873        | 1.803         | 0.374683        | 2708        | 11.004        | 1.186         | -0.22378        |
| -0.76202        | 2445        | 5.0307        | 6.0393        | -1.25323        | 3305        | 3.0257        | 9.1643        | -1.7235         |
| 0.244679        | 2332        | 11.792        | 0.722         | 0.150289        | 2659        | 14.442        | 2.252         | 0.422474        |
| <b>1.910163</b> | <b>3063</b> | <b>26.216</b> | <b>15.146</b> | <b>3.144435</b> | <b>3964</b> | <b>29.818</b> | <b>17.628</b> | <b>3.312775</b> |
| -0.33173        | 1794        | 9.1416        | 1.9284        | -0.39988        | 2196        | 6.7395        | 5.4505        | -1.0254         |
| -0.14506        | 2501        | 9.876         | 1.194         | -0.24744        | 1871        | 6.1464        | 6.0436        | -1.13689        |
| -0.29499        | 2324        | 15.62         | 4.55          | 0.944908        | 2100        | 11.952        | 0.238         | -0.04558        |
| 0.580291        | 1226        | 10.522        | 0.548         | -0.11334        | 1667        | 9.838         | 2.352         | -0.44296        |
| -1.09281        | 1036        | 3.4749        | 7.5951        | -1.57618        | 1295        | 10.502        | 1.688         | -0.31815        |
| -1.09973        | 3340        | 9.5808        | 1.4892        | -0.30871        | 3351        | 8.7138        | 3.4762        | -0.65428        |
| 0.200307        | 1918        | 6.7779        | 4.2921        | -0.89054        | 2642        | 17.298        | 5.108         | 0.95933         |
| -0.99683        | 2148        | 13.92         | 2.85          | 0.592021        | 2351        | 5.5296        | 6.6604        | -1.25283        |
| 0.015897        | 1858        | 12.594        | 1.524         | 0.316768        | 2549        | 13.731        | 1.541         | 0.288823        |
| -0.04246        | 2211        | 21.122        | 10.052        | 2.087018        | 2985        | 17.655        | 5.465         | 1.026437        |
| -0.45947        | 1489        | 9.9396        | 1.1304        | -0.23423        | 2696        | 16.988        | 4.798         | 0.901058        |
| -0.60869        | 2341        | 16.916        | 5.846         | 1.213933        | 3305        | 16.036        | 3.846         | 0.722105        |
| 0.703514        | 2221        | 18.595        | 7.525         | 1.562461        | 2905        | 14.94         | 2.75          | 0.516085        |
| 0.305866        | 2728        | 15.982        | 4.912         | 1.020052        | 4151        | 19.104        | 6.914         | 1.298812        |
| -0.68218        | 4514        | 12.605        | 1.535         | 0.319052        | 4479        | 11.721        | 0.469         | -0.08901        |
| 1.717981        | 5107        | 28.118        | 17.048        | 3.539254        | 5562        | 19.885        | 7.695         | 1.445621        |
| -0.79325        | 4633        | 12.67         | 1.6           | 0.332545        | 3723        | 3.6261        | 8.5639        | -1.61064        |
| 0.513734        | 3158        | 8.3914        | 2.6786        | -0.55561        | 2562        | 10.226        | 1.964         | -0.37003        |
| -0.11595        | 3645        | 12.373        | 1.303         | 0.270893        | 3320        | 7.4699        | 4.7201        | -0.88811        |
| -0.70832        | 2136        | 2.8558        | 8.2142        | -1.7047         | 2432        | 5.5099        | 6.6801        | -1.25654        |
| 0.260223        | 4923        | 12.696        | 1.626         | 0.337942        | 3284        | 5.877         | 6.313         | -1.18753        |
| 0.6956          | 4151        | 14.888        | 3.818         | 0.792959        | 4039        | 19.683        | 7.493         | 1.40765         |
| -0.53112        | 3625        | 11.09         | 0.02          | 0.004567        | 2479        | 3.9935        | 8.1965        | -1.54158        |
| 0.516419        | 2345        | 8.5288        | 2.5412        | -0.52709        | 2180        | 8.8991        | 3.2909        | -0.61945        |
| -0.63046        | 4060        | 13.596        | 2.526         | 0.524764        | 1695        | 4.8968        | 7.2932        | -1.37178        |
| -1.1131         | 1757        | 7.9681        | 3.1019        | -0.64348        | 2101        | 4.0457        | 8.1443        | -1.53177        |
| 0.17897         | 2103        | 10.128        | 0.942         | -0.19513        | 2372        | 9.4857        | 2.7043        | -0.50919        |
| 0.786039        | 3546        | 15.116        | 4.046         | 0.840287        | 3116        | 12.516        | 0.326         | 0.060434        |
| 0.708601        | 3814        | 8.731         | 2.339         | -0.48512        | 3296        | 7.6153        | 4.5747        | -0.86077        |
| 2.520766        | 5425        | 18.765        | 7.695         | 1.59775         | 4086        | 12.139        | 0.051         | -0.01043        |
| 1.509831        | 5558        | 21.141        | 10.071        | 2.090962        | 4987        | 7.9807        | 4.2093        | -0.79209        |
| -0.38684        | 4206        | 15.24         | 4.17          | 0.866027        | 5175        | 10.957        | 1.233         | -0.23262        |
| <b>3.433489</b> | <b>2923</b> | <b>29.969</b> | <b>18.899</b> | <b>3.923486</b> | <b>3615</b> | <b>22.296</b> | <b>10.106</b> | <b>1.898828</b> |
| <b>3.06693</b>  | <b>3972</b> | <b>29.079</b> | <b>18.009</b> | <b>3.738739</b> | <b>5242</b> | <b>18.504</b> | <b>6.314</b>  | <b>1.186027</b> |
| -1.4333         | 4651        | 8.5788        | 2.4912        | -0.51671        | 3112        | 9.608         | 2.582         | -0.4862         |
| -1.07064        | 2813        | 5.2968        | 5.7732        | -1.19799        | 3612        | 6.3123        | 5.8777        | -1.10571        |
| 0.336813        | 3867        | 7.3183        | 3.7517        | -0.77837        | 4860        | 12.263        | 0.073         | 0.012876        |
| -0.94504        | 3158        | 9.658         | 1.412         | -0.29269        | 3405        | 5.2863        | 6.9037        | -1.29857        |
| -0.04868        | 4464        | 8.3109        | 2.7591        | -0.57232        | 3258        | 10.712        | 1.478         | -0.27867        |
| 0.382881        | 3270        | 6.1468        | 4.9232        | -1.02155        | 2357        | 12.728        | 0.538         | 0.100285        |



|                 |             |               |              |                 |             |               |               |                 |
|-----------------|-------------|---------------|--------------|-----------------|-------------|---------------|---------------|-----------------|
| 0.323813        | 4561        | 12.804        | 1.734        | 0.36036         | 2776        | 16.354        | 4.164         | 0.781881        |
| -0.04063        | 3737        | 7.9476        | 3.1224       | -0.64774        | 2522        | 8.2078        | 3.9822        | -0.7494         |
| <b>1.879216</b> | <b>4085</b> | <b>21.028</b> | <b>9.958</b> | <b>2.067505</b> | <b>2856</b> | <b>25.805</b> | <b>13.615</b> | <b>2.558432</b> |
| 0.121315        | 2400        | 6.7917        | 4.2783       | -0.88768        | 2070        | 8.599         | 3.591         | -0.67586        |
| -0.44562        | 2364        | 10.829        | 0.241        | -0.04961        | 2773        | 5.9142        | 6.2758        | -1.18054        |
| 1.072334        | 1988        | 13.028        | 1.958        | 0.406858        | 1910        | 15.131        | 2.941         | 0.551988        |
| -0.68359        | 2376        | 8.4175        | 2.6525       | -0.55019        | 1837        | 12.194        | 0.004         | -9.4E-05        |
| 0.179394        | 2881        | 9.7883        | 1.2817       | -0.26564        | 3319        | 14.402        | 2.212         | 0.414955        |
| 2.208611        | 2607        | 9.8581        | 1.2119       | -0.25115        | 2867        | 10.708        | 1.482         | -0.27942        |
| 2.509461        | 4329        | 19.727        | 8.657        | 1.797443        | 3547        | 19.594        | 7.404         | 1.39092         |
| -0.46145        | 1675        | 7.1045        | 3.9655       | -0.82275        | 2003        | 5.8412        | 6.3488        | -1.19426        |
| 0.368891        | 2590        | 9.4208        | 1.6492       | -0.34193        | 4018        | 11.498        | 0.692         | -0.13092        |
| -0.4582         | 980         | 10.306        | 0.764        | -0.15818        | 2230        | 6.5919        | 5.5981        | -1.05315        |
| 0.957025        | 3400        | 21            | 9.93         | 2.061693        | 3801        | 9.2607        | 2.9293        | -0.55148        |
| -0.63342        | 2101        | 6.8539        | 4.2161       | -0.87477        | 2970        | 12.121        | 0.069         | -0.01382        |
| 0.362814        | 3588        | 16.276        | 5.206        | 1.081081        | 3612        | 11.794        | 0.396         | -0.07528        |
| 1.100031        | 3033        | 15.134        | 4.064        | 0.844024        | 2765        | 18.987        | 6.797         | 1.276819        |
| 2.28831         | 2538        | 4.2947        | 6.7753       | -1.40601        | 2657        | 14.49         | 2.3           | 0.431496        |
| 1.362727        | 3715        | 18.466        | 7.396        | 1.535683        | 2717        | 12.44         | 0.25          | 0.046148        |
| 0.333281        | 2237        | 10.907        | 0.163        | -0.03342        | 2153        | 11.983        | 0.207         | -0.03976        |
| 1.218308        | 3276        | 19.475        | 8.405        | 1.745132        | 2144        | 14.972        | 2.782         | 0.5221          |
| 0.86701         | 2562        | 10.265        | 0.805        | -0.16669        | 2451        | 15.871        | 3.681         | 0.69109         |
| -1.28544        | 2385        | 10.901        | 0.169        | -0.03467        | 1604        | 7.1696        | 5.0204        | -0.94455        |
| 1.409359        | 1929        | 18.248        | 7.178        | 1.490431        | 2927        | 30.851        | 18.661        | 3.506953        |
| 0.979634        | 2135        | 15.972        | 4.902        | 1.017977        | 2038        | 17.566        | 5.376         | 1.009707        |
| -0.60332        | 1831        | 10.268        | 0.802        | -0.16606        | 1905        | 16.85         | 4.66          | 0.875117        |
| -0.1288         | 3431        | 21.277        | 10.207       | 2.119193        | 1752        | 15.811        | 3.621         | 0.679811        |
| -0.57973        | 3465        | 8.9466        | 2.1234       | -0.44036        | 3014        | 12.376        | 0.186         | 0.034117        |
| -1.09972        | 4005        | 10.662        | 0.408        | -0.08428        | 3809        | 13.888        | 1.698         | 0.318335        |
| -1.52437        | 2747        | 6.225         | 4.845        | -1.00531        | 2255        | 2.5277        | 9.6623        | -1.81712        |
| -1.0376         | 1766        | 10.079        | 0.991        | -0.2053         | 961         | 10.822        | 1.368         | -0.258          |
| -0.6939         | 2360        | 2.7966        | 8.2734       | -1.71698        | 1571        | 12.222        | 0.032         | 0.005169        |
| -0.88142        | 2564        | 10.998        | 0.072        | -0.01453        | 1728        | 8.4491        | 3.7409        | -0.70404        |
| -1.41623        | 2840        | 6.2324        | 4.8376       | -1.00378        | 2964        | 1.9231        | 10.2669       | -1.93077        |
| -0.86319        | 3677        | 9.4098        | 1.6602       | -0.34421        | 4361        | 9.7455        | 2.4445        | -0.46035        |
| 0.315899        | 3767        | 11.627        | 0.557        | 0.116038        | 2450        | 13.551        | 1.361         | 0.254988        |
| 1.646196        | 2656        | 15.324        | 4.254        | 0.883464        | 3605        | 19.029        | 6.839         | 1.284714        |
| 0.729798        | 3460        | 16.156        | 5.086        | 1.056171        | 4225        | 13.846        | 1.656         | 0.310441        |
| -1.0189         | 2330        | 6.4378        | 4.6322       | -0.96114        | 2136        | 5.9457        | 6.2443        | -1.17462        |
| -0.07949        | 4229        | 12.06         | 0.99         | 0.20592         | 3528        | 16.412        | 4.222         | 0.792784        |
| 0.681045        | 3382        | 15.169        | 4.099        | 0.851289        | 3480        | 13.879        | 1.689         | 0.316644        |
| -0.08895        | 4518        | 11.554        | 0.484        | 0.100884        | 2654        | 11.492        | 0.698         | -0.13205        |
| 0.163002        | 4142        | 16.248        | 5.178        | 1.075269        | 2405        | 12.848        | 0.658         | 0.122842        |
| 0.51981         | 2865        | 10.611        | 0.459        | -0.09486        | 2380        | 12.689        | 0.499         | 0.092954        |
| -0.12004        | 3374        | 13.189        | 2.119        | 0.440279        | 2338        | 13.259        | 1.069         | 0.200099        |
| -0.73107        | 2187        | 16.232        | 5.162        | 1.071948        | 1831        | 22.774        | 10.584        | 1.98868         |
| -0.31138        | 4436        | 20.018        | 8.948        | 1.857849        | 2672        | 17.066        | 4.876         | 0.91572         |



|               |             |               |              |                 |             |               |               |                 |
|---------------|-------------|---------------|--------------|-----------------|-------------|---------------|---------------|-----------------|
| -0.67624      | 4357        | 12.073        | 1.003        | 0.208619        | 1858        | 13.778        | 1.588         | 0.297658        |
| -0.4151       | 3505        | 26.79         | 15.72        | 3.263586        | 2340        | 18.889        | 6.699         | 1.258398        |
| -0.3094       | 4734        | 19.983        | 8.913        | 1.850583        | 3453        | 22.415        | 10.225        | 1.921197        |
| 0.174448      | 3391        | 16.455        | 5.385        | 1.118238        | 3316        | 20.326        | 8.136         | 1.528518        |
| -1.31077      | 3424        | 13.989        | 2.919        | 0.606344        | 2748        | 14.956        | 2.766         | 0.519093        |
| -1.91659      | 1424        | 5.8989        | 5.1711       | -1.07301        | 1850        | 8.1622        | 4.0278        | -0.75797        |
| 0.139403      | 4458        | 27.658        | 16.588       | 3.443766        | 4884        | 19.82         | 7.63          | 1.433402        |
| -1.21889      | 3381        | 5.8267        | 5.2433       | -1.08799        | 3142        | 5.697         | 6.493         | -1.22137        |
| 1.87964       | 5722        | 22.003        | 10.933       | 2.269897        | 4757        | 22.598        | 10.408        | 1.955597        |
| -0.32805      | 4265        | 11.841        | 0.771        | 0.16046         | 3226        | 8.4625        | 3.7275        | -0.70152        |
| -0.46569      | 5521        | 13.349        | 2.279        | 0.473492        | 4432        | 11.191        | 0.999         | -0.18863        |
| 0.443361      | 5360        | 18.153        | 7.083        | 1.47071         | 3276        | 16.026        | 3.836         | 0.720226        |
| 0.086129      | 4166        | 13.346        | 2.276        | 0.472869        | 1803        | 8.7077        | 3.4823        | -0.65543        |
| 1.344498      | 5673        | 22.563        | 11.493       | 2.386142        | 2768        | 15.788        | 3.598         | 0.675488        |
| -0.84256      | 3917        | 6.5101        | 4.5599       | -0.94613        | 1845        | 9.5935        | 2.5965        | -0.48892        |
| 0.018017      | 3045        | 9.0312        | 2.0388       | -0.4228         | 2910        | 12.062        | 0.128         | -0.02491        |
| -0.53366      | 3470        | 9.683         | 1.387        | -0.2875         | 1943        | 7.5142        | 4.6758        | -0.87978        |
| 0.295692      | 3730        | 12.359        | 1.289        | 0.267987        | 2842        | 9.5004        | 2.6896        | -0.50642        |
| 1.702578      | 3188        | 18.256        | 7.186        | 1.492091        | 2148        | 16.527        | 4.337         | 0.814401        |
| 1.624292      | 4578        | 22.368        | 11.298       | 2.345664        | 2527        | 16.502        | 4.312         | 0.809702        |
| -0.31095      | 3404        | 10.165        | 0.905        | -0.18745        | 2667        | 10.461        | 1.729         | -0.32585        |
| -0.45749      | 3078        | 9.974         | 1.096        | -0.22709        | 1961        | 7.2922        | 4.8978        | -0.92151        |
| -0.90389      | 4615        | 6.5655        | 4.5045       | -0.93463        | 2790        | 12.222        | 0.032         | 0.005169        |
| 1.060888      | 4473        | 16.968        | 5.898        | 1.224727        | 3463        | 16.806        | 4.616         | 0.866846        |
| 1.622597      | 5167        | 16.741        | 5.671        | 1.177606        | 3788        | 9.1341        | 3.0559        | -0.57528        |
| -0.48929      | 4639        | 15.413        | 4.343        | 0.901939        | 3471        | 10.545        | 1.645         | -0.31006        |
| -0.23422      | 3030        | 11.716        | 0.646        | 0.134512        | 1775        | 5.6338        | 6.5562        | -1.23325        |
| -0.36055      | 5285        | 13.321        | 2.251        | 0.46768         | 5245        | 10.105        | 2.085         | -0.39277        |
| -0.35547      | 4863        | 10.343        | 0.727        | -0.1505         | 2629        | 10.65         | 1.54          | -0.29033        |
| -0.3614       | 4059        | 14.043        | 2.973        | 0.617553        | 3476        | 12.86         | 0.67          | 0.125097        |
| 1.308181      | 4568        | 18.695        | 7.625        | 1.583219        | 2536        | 20.071        | 7.881         | 1.480584        |
| -1.18928      | 2941        | 9.5546        | 1.5154       | -0.31415        | 2288        | 10.795        | 1.395         | -0.26307        |
| -0.32819      | 5280        | 12.008        | 0.938        | 0.195126        | 3699        | 13.923        | 1.733         | 0.324915        |
| -0.38514      | 3751        | 7.9712        | 3.0988       | -0.64284        | 2204        | 11.025        | 1.165         | -0.21984        |
| <b>2.2657</b> | <b>4142</b> | <b>20.521</b> | <b>9.451</b> | <b>1.962262</b> | <b>2766</b> | <b>31.634</b> | <b>19.444</b> | <b>3.654138</b> |
| 1.328247      | 5450        | 17.67         | 6.6          | 1.370449        | 2482        | 24.819        | 12.629        | 2.373089        |
| 0.822215      | 3290        | 14.286        | 3.216        | 0.667995        | 2046        | 18.671        | 6.481         | 1.217419        |
| -0.2215       | 2969        | 11.317        | 0.247        | 0.051688        | 2296        | 15.418        | 3.228         | 0.605937        |
| -0.69475      | 3020        | 8.9073        | 2.1627       | -0.44852        | 2234        | 12.668        | 0.478         | 0.089006        |
| 1.204883      | 3794        | 23.01         | 11.94        | 2.478931        | 2381        | 21.756        | 9.566         | 1.797322        |
| -0.8858       | 3076        | 6.567         | 4.503        | -0.93432        | 1650        | 5.697         | 6.493         | -1.22137        |
| -0.70931      | 2703        | 7.0292        | 4.0408       | -0.83838        | 1969        | 5.6374        | 6.5526        | -1.23257        |
| -0.22037      | 4510        | 13.193        | 2.123        | 0.441109        | 3948        | 14.564        | 2.374         | 0.445406        |
| 0.633565      | 4775        | 13.55         | 2.48         | 0.515216        | 3486        | 6.5978        | 5.5922        | -1.05204        |
| 0.720754      | 5491        | 17.92         | 6.85         | 1.422344        | 3762        | 12.892        | 0.702         | 0.131112        |
| -0.20271      | 4525        | 9.6354        | 1.4346       | -0.29738        | 5001        | 6.7786        | 5.4114        | -1.01805        |
| -0.79692      | 2791        | 8.4558        | 2.6142       | -0.54224        | 3406        | 3.7874        | 8.4026        | -1.58032        |

|                 |             |               |              |                 |             |               |               |                 |
|-----------------|-------------|---------------|--------------|-----------------|-------------|---------------|---------------|-----------------|
| -1.3012         | 3453        | 4.8074        | 6.2626       | -1.29958        | 3138        | 7.9987        | 4.1913        | -0.7887         |
| 0.589618        | 4356        | 14.899        | 3.829        | 0.795242        | 3140        | 12.675        | 0.485         | 0.090322        |
| <b>2.442197</b> | <b>4290</b> | <b>20.513</b> | <b>9.443</b> | <b>1.960601</b> | <b>3795</b> | <b>29.908</b> | <b>17.718</b> | <b>3.329693</b> |
| -0.44068        | 3928        | 4.6843        | 6.3857       | -1.32513        | 3533        | 6.9063        | 5.2837        | -0.99405        |
| 1.292637        | 4701        | 17.124        | 6.054        | 1.25711         | 3162        | 17.932        | 5.742         | 1.078506        |
| -0.81571        | 4119        | 12.115        | 1.045        | 0.217337        | 3246        | 9.1189        | 3.0711        | -0.57814        |
| -0.47671        | 3309        | 12.451        | 1.381        | 0.287084        | 2358        | 9.542         | 2.648         | -0.4986         |
| 0.303747        | 5580        | 17.24         | 6.17         | 1.281189        | 3339        | 13.267        | 1.077         | 0.201603        |
| -0.79084        | 3729        | 6.6506        | 4.4194       | -0.91697        | 2506        | 10.255        | 1.935         | -0.36458        |
| 0.173459        | 3343        | 10.081        | 0.989        | -0.20488        | 2315        | 11.793        | 0.397         | -0.07547        |
| 0.742515        | 3542        | 8.9497        | 2.1203       | -0.43972        | 3150        | 16.857        | 4.667         | 0.876433        |
| 0.250897        | 4394        | 12.016        | 0.946        | 0.196787        | 2343        | 16.133        | 3.943         | 0.740339        |
| 0.214862        | 2709        | 11            | 0.07         | -0.01412        | 2452        | 12.072        | 0.118         | -0.02303        |
| -0.02438        | 4273        | 13.457        | 2.387        | 0.495911        | 2638        | 13.04         | 0.85          | 0.158933        |
| 1.000266        | 3783        | 14.592        | 3.522        | 0.731515        | 1758        | 13.424        | 1.234         | 0.231115        |
| 0.682035        | 3396        | 12.603        | 1.533        | 0.318637        | 2758        | 5.7288        | 6.4612        | -1.21539        |
| 1.137761        | 3869        | 11.347        | 0.277        | 0.057915        | 2242        | 14.451        | 2.261         | 0.424165        |
| 2.426935        | 3403        | 19.424        | 8.354        | 1.734546        | 3103        | 20.432        | 8.242         | 1.548443        |
| 0.593433        | 4654        | 11.667        | 0.597        | 0.124341        | 1872        | 5.8226        | 6.3674        | -1.19776        |
| -1.18246        | 3523        | 4.5416        | 6.5284       | -1.35476        | 2971        | 8.9869        | 3.2031        | -0.60295        |
| -0.32551        | 3111        | 9.5468        | 1.5232       | -0.31577        | 2988        | 11.178        | 1.012         | -0.19108        |
| -0.0012         | 4875        | 10.482        | 0.588        | -0.12164        | 4330        | 9.6767        | 2.5133        | -0.47328        |
| 1.449915        | 2865        | 14.38         | 3.31         | 0.687508        | 2442        | 17.731        | 5.541         | 1.040723        |
| 1.065268        | 4485        | 19.331        | 8.261        | 1.715241        | 4310        | 14.037        | 1.847         | 0.346344        |
| -0.87987        | 4067        | 7.942         | 3.128        | -0.6489         | 3687        | 8.652         | 3.538         | -0.6659         |
| 0.586933        | 2375        | 13.853        | 2.783        | 0.578113        | 2297        | 10.535        | 1.655         | -0.31194        |
| -0.21557        | 2328        | 4.854         | 6.216        | -1.28991        | 2853        | 8.4823        | 3.7077        | -0.6978         |
| -0.7021         | 3955        | 9.7345        | 1.3355       | -0.27681        | 3389        | 12.216        | 0.026         | 0.004041        |
| -0.8916         | 2293        | 7.1958        | 3.8742       | -0.80379        | 1747        | 6.411         | 5.779         | -1.08715        |
| <b>2.188686</b> | <b>2382</b> | <b>18.22</b>  | <b>7.15</b>  | <b>1.484618</b> | <b>2863</b> | <b>24.625</b> | <b>12.435</b> | <b>2.336622</b> |
| 0.863195        | 3562        | 10.303        | 0.767        | -0.1588         | 3613        | 17.271        | 5.081         | 0.954254        |
| 0.424284        | 4502        | 16.948        | 5.878        | 1.220575        | 4035        | 18.959        | 6.769         | 1.271556        |
| -0.38076        | 3367        | 11.642        | 0.572        | 0.119151        | 3093        | 13.256        | 1.066         | 0.199535        |
| 0.073976        | 3513        | 14.831        | 3.761        | 0.781127        | 3947        | 14.644        | 2.454         | 0.460444        |
| 0.755657        | 3089        | 10.91         | 0.16         | -0.0328         | 3546        | 13.818        | 1.628         | 0.305177        |
| -0.25542        | 3785        | 18.653        | 7.583        | 1.574501        | 3362        | 7.3766        | 4.8134        | -0.90564        |
| 2.338051        | 3407        | 18.609        | 7.539        | 1.565367        | 3523        | 16.435        | 4.245         | 0.797107        |
| 0.904033        | 5499        | 22.677        | 11.607       | 2.409806        | 4358        | 18.311        | 6.121         | 1.149748        |
| 1.880488        | 4253        | 16.412        | 5.342        | 1.109312        | 6050        | 17.14         | 4.95          | 0.92963         |
| 0.416936        | 3611        | 9.028         | 2.042        | -0.42346        | 3327        | 9.5582        | 2.6318        | -0.49556        |
| 1.605357        | 5646        | 13.673        | 2.603        | 0.540748        | 3824        | 23.3          | 11.11         | 2.087555        |
| -0.0525         | 3957        | 7.7837        | 3.2863       | -0.68176        | 3750        | 10.827        | 1.363         | -0.25706        |
| 1.268473        | 4221        | 11.158        | 0.088        | 0.018682        | 5405        | 15.19         | 3             | 0.563079        |
| -0.08401        | 4271        | 8.6631        | 2.4069       | -0.49921        | 4115        | 10.96         | 1.23          | -0.23205        |
| 0.936252        | 4308        | 11.328        | 0.258        | 0.053971        | 5630        | 16.075        | 3.885         | 0.729436        |
| -0.4859         | 3717        | 8.5015        | 2.5685       | -0.53276        | 4268        | 10.989        | 1.201         | -0.2266         |
| 2.091606        | 2832        | 11.441        | 0.371        | 0.077428        | 3878        | 18.592        | 6.402         | 1.202569        |

|          |      |        |        |          |      |        |        |          |
|----------|------|--------|--------|----------|------|--------|--------|----------|
| -0.56771 | 4021 | 8.0826 | 2.9874 | -0.61971 | 4663 | 8.8784 | 3.3116 | -0.62334 |
| 1.370499 | 3354 | 16.13  | 5.06   | 1.050774 | 3850 | 16.312 | 4.122  | 0.773987 |
| -0.51416 | 2673 | 6.9211 | 4.1489 | -0.86082 | 2296 | 10.801 | 1.389  | -0.26194 |
| 0.606999 | 3400 | 8.7353 | 2.3347 | -0.48422 | 3366 | 10.22  | 1.97   | -0.37116 |
| -1.15318 | 3892 | 8.6331 | 2.4369 | -0.50544 | 3058 | 5.8535 | 6.3365 | -1.19195 |
| 2.353454 | 3110 | 16.752 | 5.682  | 1.17989  | 4187 | 20.444 | 8.254  | 1.550699 |
| -0.20963 | 3666 | 7.9651 | 3.1049 | -0.6441  | 4632 | 6.5846 | 5.6054 | -1.05452 |
| -0.65349 | 3634 | 10.402 | 0.668  | -0.13825 | 4636 | 6.8809 | 5.3091 | -0.99882 |
| 1.06117  | 6215 | 17.233 | 6.163  | 1.279736 | 5445 | 14.766 | 2.576  | 0.483377 |
| 1.167153 | 4505 | 20.91  | 9.84   | 2.043011 | 4844 | 13.398 | 1.208  | 0.226228 |
| 0.079346 | 4567 | 15.349 | 4.279  | 0.888654 | 4001 | 8.4729 | 3.7171 | -0.69957 |
| -1.12085 | 4297 | 6.586  | 4.484  | -0.93038 | 4598 | 3.719  | 8.471  | -1.59318 |
| -0.03851 | 2310 | 10.563 | 0.507  | -0.10483 | 3140 | 8.535  | 3.655  | -0.68789 |
| -0.28071 | 4158 | 9.3795 | 1.6905 | -0.3505  | 6287 | 14.729 | 2.539  | 0.476422 |
| -0.34261 | 2569 | 8.4079 | 2.6621 | -0.55219 | 4478 | 9.3345 | 2.8555 | -0.53761 |
| -0.23309 | 2552 | 4.1928 | 6.8772 | -1.42716 | 5118 | 10.531 | 1.659  | -0.3127  |
| -0.06564 | 3900 | 14.333 | 3.263  | 0.677751 | 4909 | 18.517 | 6.327  | 1.188471 |
| 0.680904 | 4244 | 18.332 | 7.262  | 1.507867 | 5879 | 16.244 | 4.054  | 0.761204 |
| -0.69207 | 2946 | 8.3503 | 2.7197 | -0.56414 | 4371 | 8.0988 | 4.0912 | -0.76989 |
| 0.001201 | 2484 | 5.6361 | 5.4339 | -1.12756 | 5348 | 10.527 | 1.663  | -0.31345 |
| 0.902903 | 2210 | 19.095 | 8.025  | 1.666252 | 3338 | 22.259 | 10.069 | 1.891873 |
| 0.632293 | 2745 | 7.4681 | 3.6019 | -0.74727 | 3178 | 17.464 | 5.274  | 0.990534 |
| 1.324432 | 3371 | 12.519 | 1.449  | 0.3012   | 3803 | 22.403 | 10.213 | 1.918941 |
| -0.97742 | 3332 | 7.6531 | 3.4169 | -0.70887 | 3301 | 10.936 | 1.254  | -0.23657 |
| 0.05391  | 3427 | 7.5576 | 3.5124 | -0.72869 | 3985 | 10.013 | 2.177  | -0.41007 |
| 1.301257 | 3405 | 13.363 | 2.293  | 0.476398 | 4254 | 25.505 | 13.315 | 2.50204  |
| 0.951796 | 3982 | 13.184 | 2.114  | 0.439241 | 3800 | 19.842 | 7.652  | 1.437538 |
| -0.87549 | 3425 | 4.4964 | 6.5736 | -1.36414 | 4690 | 7.8465 | 4.3435 | -0.81731 |
| -0.00276 | 4422 | 8.0959 | 2.9741 | -0.61695 | 4848 | 19.884 | 7.694  | 1.445433 |
| 0.073128 | 2540 | 6.4173 | 4.6527 | -0.9654  | 4188 | 14.422 | 2.232  | 0.418714 |
| 1.205166 | 4140 | 11.932 | 0.862  | 0.17935  | 5540 | 21.444 | 9.254  | 1.738674 |
| -0.22179 | 3561 | 10.643 | 0.427  | -0.08822 | 5041 | 12.557 | 0.367  | 0.068141 |
| -0.81628 | 3791 | 7.5442 | 3.5258 | -0.73147 | 2555 | 8.9237 | 3.2663 | -0.61483 |
| 2.35303  | 4221 | 16.986 | 5.916  | 1.228463 | 4046 | 16.881 | 4.691  | 0.880944 |
| -0.45382 | 3021 | 9.8312 | 1.2388 | -0.25674 | 4493 | 18.184 | 5.994  | 1.125875 |
| -0.72499 | 2606 | 5.9862 | 5.0838 | -1.05488 | 5014 | 10.311 | 1.879  | -0.35405 |
| -0.18462 | 3090 | 5.5663 | 5.5037 | -1.14205 | 5518 | 16.636 | 4.446  | 0.83489  |
| -0.66833 | 2663 | 7.8858 | 3.1842 | -0.66056 | 4358 | 7.0445 | 5.1455 | -0.96807 |
| 0.143642 | 2395 | 4.3006 | 6.7694 | -1.40478 | 4834 | 15.391 | 3.201  | 0.600862 |
| 1.994808 | 2733 | 4.4274 | 6.6426 | -1.37846 | 4702 | 19.46  | 7.27   | 1.365731 |
| -0.10266 | 2524 | 4.0016 | 7.0684 | -1.46685 | 4438 | 15.412 | 3.222  | 0.604809 |
| 1.205307 | 2906 | 11.046 | 0.024  | -0.00457 | 4432 | 21.39  | 9.2    | 1.728523 |
| 2.53419  | 2678 | 12.92  | 1.85   | 0.38444  | 4493 | 25.351 | 13.161 | 2.473091 |
| 0.849911 | 2482 | 6.5673 | 4.5027 | -0.93426 | 3722 | 18.861 | 6.671  | 1.253134 |
| 1.067529 | 2413 | 7.1695 | 3.9005 | -0.80925 | 2609 | 14.488 | 2.298  | 0.43112  |
| 1.638847 | 2597 | 11.205 | 0.135  | 0.028439 | 4681 | 20.722 | 8.532  | 1.602956 |
| 0.798757 | 2388 | 6.4489 | 4.6211 | -0.95884 | 3280 | 10.701 | 1.489  | -0.28074 |

|                 |             |               |               |                 |             |               |               |                 |
|-----------------|-------------|---------------|---------------|-----------------|-------------|---------------|---------------|-----------------|
| 0.438416        | 2148        | 7.635         | 3.435         | -0.71263        | 2954        | 13.304        | 1.114         | 0.208558        |
| 1.542332        | 3793        | 14.316        | 3.246         | 0.674223        | 4239        | 16.749        | 4.559         | 0.856132        |
| 0.13799         | 3524        | 7.8604        | 3.2096        | -0.66584        | 3011        | 10.594        | 1.596         | -0.30085        |
| 0.619717        | 3937        | 9.9568        | 1.1132        | -0.23066        | 3395        | 14.786        | 2.596         | 0.487137        |
| 0.141098        | 4049        | 13.46         | 2.39          | 0.496533        | 2659        | 11.358        | 0.832         | -0.15724        |
| 1.16136         | 3176        | 14.767        | 3.697         | 0.767842        | 1981        | 14.841        | 2.651         | 0.497475        |
| 1.42349         | 6344        | 19.404        | 8.334         | 1.730394        | 4274        | 14.904        | 2.714         | 0.509318        |
| 1.395087        | 5056        | 14.043        | 2.973         | 0.617553        | 4810        | 17.672        | 5.482         | 1.029632        |
| 0.09164         | 5023        | 12.522        | 1.452         | 0.301823        | 4453        | 8.8929        | 3.2971        | -0.62062        |
| -0.37016        | 4418        | 11.634        | 0.564         | 0.117491        | 5228        | 9.5065        | 2.6835        | -0.50528        |
| 1.68661         | 3262        | 20.233        | 9.163         | 1.902479        | 3761        | 14.597        | 2.407         | 0.45161         |
| 1.372053        | 2644        | 28.328        | 17.258        | 3.582846        | 2398        | 14.762        | 2.572         | 0.482625        |
| -0.9087         | 3433        | 10.108        | 0.962         | -0.19928        | 4394        | 10.173        | 2.017         | -0.37999        |
| 0.497342        | 3224        | 14.051        | 2.981         | 0.619214        | 4174        | 12.195        | 0.005         | 9.4E-05         |
| <b>1.433523</b> | <b>1940</b> | <b>23.402</b> | <b>12.332</b> | <b>2.560302</b> | <b>4283</b> | <b>32.08</b>  | <b>19.89</b>  | <b>3.737974</b> |
| -0.57393        | 2419        | 9.7561        | 1.3139        | -0.27233        | 2796        | 7.01          | 5.18          | -0.97456        |
| -0.03893        | 2472        | 13.552        | 2.482         | 0.515631        | 3470        | 11.383        | 0.807         | -0.15254        |
| 0.730363        | 3120        | 16.154        | 5.084         | 1.055756        | 4150        | 11.518        | 0.672         | -0.12717        |
| -1.01416        | 2462        | 5.6052        | 5.4648        | -1.13397        | 4134        | 7.015         | 5.175         | -0.97362        |
| 0.306149        | 3348        | 14.456        | 3.386         | 0.703284        | 5814        | 10.01         | 2.18          | -0.41063        |
| 0.454525        | 2884        | 16.436        | 5.366         | 1.114294        | 4344        | 11.948        | 0.242         | -0.04634        |
| -0.26178        | 3016        | 12.5          | 1.43          | 0.297256        | 5056        | 8.1883        | 4.0017        | -0.75306        |
| -0.66635        | 4022        | 12.108        | 1.038         | 0.215884        | 4858        | 6.6694        | 5.5206        | -1.03858        |
| -0.24496        | 3566        | 25.014        | 13.944        | 2.894923        | 4841        | 9.9566        | 2.2334        | -0.42067        |
| -0.62042        | 2936        | 15.327        | 4.257         | 0.884087        | 4597        | 9.8978        | 2.2922        | -0.43172        |
| 0.342607        | 5253        | 19.17         | 8.1           | 1.68182         | 3789        | 5.8327        | 6.3573        | -1.19586        |
| -0.43615        | 4720        | 10.72         | 0.35          | -0.07224        | 5432        | 8.7629        | 3.4271        | -0.64505        |
| 0.108173        | 3540        | 13.305        | 2.235         | 0.464358        | 3698        | 16.549        | 4.359         | 0.818537        |
| 0.675676        | 5274        | 18.733        | 7.663         | 1.591107        | 5653        | 15.019        | 2.829         | 0.530935        |
| 0.025224        | 4503        | 10.326        | 0.744         | -0.15402        | 4827        | 9.7576        | 2.4324        | -0.45808        |
| -0.63583        | 4229        | 13.975        | 2.905         | 0.603438        | 5192        | 10.921        | 1.269         | -0.23939        |
| -0.96228        | 3055        | 4.9427        | 6.1273        | -1.27149        | 4074        | 3.8537        | 8.3363        | -1.56786        |
| -1.57907        | 4083        | 8.3762        | 2.6938        | -0.55877        | 2916        | 4.0809        | 8.1091        | -1.52515        |
| -0.73022        | 3462        | 7.0191        | 4.0509        | -0.84047        | 3958        | 10.46         | 1.73          | -0.32604        |
| -0.67568        | 2957        | 12.445        | 1.375         | 0.285839        | 2587        | 13.22         | 1.03          | 0.192768        |
| 0.330737        | 3451        | 10.519        | 0.551         | -0.11396        | 3745        | 17.33         | 5.14          | 0.965345        |
| -0.04684        | 3541        | 14.092        | 3.022         | 0.627724        | 2853        | 22.047        | 9.857         | 1.852022        |
| -1.27769        | 2951        | 9.7933        | 1.2767        | -0.2646         | 3010        | 9.0365        | 3.1535        | -0.59362        |
| <b>1.848128</b> | <b>4064</b> | <b>21.998</b> | <b>10.928</b> | <b>2.268859</b> | <b>4190</b> | <b>23.532</b> | <b>11.342</b> | <b>2.131165</b> |
| 0.553301        | 3236        | 17.862        | 6.792         | 1.410304        | 3509        | 21.317        | 9.127         | 1.714801        |
| 0.687263        | 3617        | 19.519        | 8.449         | 1.754266        | 2431        | 17.195        | 5.005         | 0.939968        |
| 0.729232        | 2134        | 15.323        | 4.253         | 0.883257        | 2030        | 14.335        | 2.145         | 0.40236         |
| -0.34459        | 4389        | 15.562        | 4.492         | 0.932868        | 4802        | 14.952        | 2.762         | 0.518341        |
| -0.90474        | 3897        | 13.754        | 2.684         | 0.557562        | 3250        | 15.2          | 3.01          | 0.564958        |
| 0.213873        | 3811        | 12.91         | 1.84          | 0.382364        | 2943        | 12.504        | 0.314         | 0.058178        |
| -0.17318        | 4785        | 8.255         | 2.815         | -0.58392        | 3350        | 9.9104        | 2.2796        | -0.42935        |
| -1.42247        | 3131        | 5.5893        | 5.4807        | -1.13727        | 2692        | 6.8351        | 5.3549        | -1.00743        |

|          |         |        |         |          |        |         |         |          |
|----------|---------|--------|---------|----------|--------|---------|---------|----------|
| 0.218537 | 4196    | 8.7703 | 2.2997  | -0.47696 | 3498   | 15.466  | 3.276   | 0.61496  |
| -0.13107 | 3095    | 8.8853 | 2.1847  | -0.45309 | 2230   | 14.439  | 2.249   | 0.42191  |
| 1.28755  | 2981    | 13.385 | 2.315   | 0.480965 | 3597   | 17.737  | 5.547   | 1.041851 |
| 0.066487 | 2749    | 6.1477 | 4.9223  | -1.02136 | 4089   | 12.301  | 0.111   | 0.020019 |
| 1.059616 | 2054    | 9.445  | 1.625   | -0.3369  | 3882   | 22.798  | 10.608  | 1.993192 |
| 0.431633 | 4010    | 10.599 | 0.471   | -0.09736 | 3533   | 10.558  | 1.632   | -0.30762 |
| 0.293855 | 2404    | 9.4842 | 1.5858  | -0.32877 | 3127   | 21.554  | 9.364   | 1.759351 |
| 1.074171 | 2367    | 7.6468 | 3.4232  | -0.71018 | 2676   | 20.516  | 8.326   | 1.564233 |
| -1.29076 | 3106    | 6.4392 | 4.6308  | -0.96085 | 2966   | 10.823  | 1.367   | -0.25781 |
| -0.79763 | 1492    | 10.523 | 0.547   | -0.11313 | 2706   | 15.484  | 3.294   | 0.618343 |
| -1.24469 | 1156    | 6.3149 | 4.7551  | -0.98665 | 2192   | 7.3905  | 4.7995  | -0.90303 |
| 0.501299 | 2981    | 14.626 | 3.556   | 0.738573 | 5559   | 25.256  | 13.066  | 2.455234 |
| 1.06216  | 4088    | 14.946 | 3.876   | 0.804999 | 4355   | 39.013  | 26.823  | 5.041204 |
| -0.23634 | 2612    | 8.3461 | 2.7239  | -0.56501 | 3880   | 14.33   | 2.14    | 0.40142  |
| 0.579585 | 2971    | 8.8522 | 2.2178  | -0.45996 | 2981   | 23.314  | 11.124  | 2.090187 |
| -1.13874 | 3273    | 4.8274 | 6.2426  | -1.29543 | 4146   | 15.002  | 2.812   | 0.527739 |
| -0.37779 | 2979    | 3.4575 | 7.6125  | -1.57979 | 4056   | 8.925   | 3.265   | -0.61458 |
| -0.9931  | 5056    | 6.3093 | 4.7607  | -0.98782 | 3965   | 8.3733  | 3.8167  | -0.71829 |
| -0.76188 | 3349    | 2.986  | 8.084   | -1.67767 | 3281   | 11.612  | 0.578   | -0.1095  |
| -0.98587 | 3182    | 14.205 | 3.135   | 0.651181 | 4472   | 10.219  | 1.971   | -0.37134 |
| -0.59838 | 1686    | 11.981 | 0.911   | 0.189521 | 3813   | 9.861   | 2.329   | -0.43864 |
| -0.81953 | 3725    | 10.47  | 0.6     | -0.12413 | 4495   | 6.8743  | 5.3157  | -1.00006 |
| 0.211188 | 1929    | 6.7392 | 4.3308  | -0.89858 | 3595   | 9.3185  | 2.8715  | -0.54062 |
| -0.21613 | 2063    | 9.5977 | 1.4723  | -0.30521 | 4090   | 8.6308  | 3.5592  | -0.66989 |
| -1.02063 | 2249    | 5.3802 | 5.6898  | -1.18068 | 3613   | 2.8508  | 9.3392  | -1.75638 |
| -0.15989 | 1492    | 9.6515 | 1.4185  | -0.29404 | 2384   | 9.4379  | 2.7521  | -0.51817 |
| 0.335683 | 1483    | 4.1807 | 6.8893  | -1.42967 | 5493   | 12.689  | 0.499   | 0.092954 |
| 0.67511  | 1315    | 16.046 | 4.976   | 1.033337 | 2785   | 14.111  | 1.921   | 0.360254 |
| -0.40789 | 1763    | 8.7351 | 2.3349  | -0.48427 | 3286   | 12.112  | 0.078   | -0.01551 |
| -0.26107 | 1610    | 8.1988 | 2.8712  | -0.59559 | 3499   | 12.632  | 0.442   | 0.082239 |
| 0.430361 | 1863    | 12.024 | 0.954   | 0.198447 | 4838   | 20.463  | 8.273   | 1.55427  |
| -0.76202 | 1009    | 6.5411 | 4.5289  | -0.9397  | 4359   | 7.5705  | 4.6195  | -0.8692  |
| -0.1524  | 1262    | 5.7845 | 5.2855  | -1.09675 | 4027   | 8.9397  | 3.2503  | -0.61182 |
| -0.81218 | 1970    | 9.9492 | 1.1208  | -0.23224 | 4340   | 8.4562  | 3.7338  | -0.70271 |
| 0.424002 | 2114    | 5.3926 | 5.6774  | -1.1781  | 3564   | 8.3895  | 3.8005  | -0.71524 |
| -1.2586  | 1590    | 3.7107 | 7.3593  | -1.52723 | 3084   | 3.1128  | 9.0772  | -1.70713 |
| 0.745483 | 2196    | 3.2787 | 7.7913  | -1.61691 | 4858   | 18.979  | 6.789   | 1.275316 |
| -1.00566 | 2004    | 5.1397 | 5.9303  | -1.2306  | 3322   | 3.1306  | 9.0594  | -1.70379 |
| -0.15057 | 2382    | 5.4996 | 5.5704  | -1.15589 | 2324   | 8.3907  | 3.7993  | -0.71502 |
|          | 3369    | 11.068 | 3.255   |          | 3324.5 | 12.1945 | 3.5945  |          |
|          |         |        | 9.765   |          |        |         | 10.7835 |          |
|          |         |        | 4.8174  |          |        |         | 5.31986 |          |
| 2258     | 47.653  |        | 3380    | 39.231   |        |         |         |          |
| 2295     | 45.795  |        | 2469    | 37.303   |        |         |         |          |
| 2894     | 51.9    |        | 1404    | 40.1     |        |         |         |          |
| 5618     | 58.366  |        | 3156    | 43.504   |        |         |         |          |
| 3266.25  | 50.9285 |        | 2602.25 | 40.0345  |        |         |         |          |

|          |          |          |          |
|----------|----------|----------|----------|
| 1594.699 | 5.577991 | 887.8988 | 2.591552 |
| 2702     | 12.361   | 899      | 6.4516   |
| 2022     | 5.8853   | 781      | 6.9142   |
| 1104     | 11.051   | 1190     | 7.395    |
| 1924     | 12.11    | 1141     | 4.645    |
| 1683.333 | 9.6821   | 1037.333 | 6.318067 |
| 504.1045 | 3.330486 | 223.3391 | 1.468726 |
|          | 0        |          | 7.774656 |
|          | 9.991458 |          | 4.406178 |
|          | 9.991458 |          | 12.18083 |
|          | 41.2464  |          | 33.71643 |
|          | 0.242238 |          | 0.361273 |
|          | 0.757762 |          | 0.638727 |

|      |        |      |        |
|------|--------|------|--------|
| 399  | 14.536 | 308  | 16.234 |
| 408  | 3.9216 | 308  | 16.558 |
| 4219 | 13.961 | 3303 | 13.685 |
| 4240 | 7.5708 | 3981 | 10.55  |
| 5026 | 24.831 | 7454 | 22.887 |
| 4439 | 9.0336 | 6963 | 31.725 |

y

y  
y

y



y

y

y



y

y

|           |                         |                  | cell ct | % inf  | AD      |
|-----------|-------------------------|------------------|---------|--------|---------|
| 50071 A02 | M-010297- phospholip    | 123745 PLA2G4E   | 4437    | 21.14  | 3.57    |
| 50071 A04 | M-022414- fibronectin   | 123722 FSD2      | 4040    | 14.356 | 3.214   |
| 50071 A05 | M-031876- mast cell in  | 116449 MIST      | 4583    | 28.322 | 10.752  |
| 50071 A06 | M-022415- WAS prote     | 123720 WHDC1     | 3676    | 7.9978 | 9.5722  |
| 50071 A07 | M-015177- chromoson     | 116461 C1orf19   | 2889    | 11.7   | 5.87    |
| 50071 A08 | M-017061- ATP/GTP bi    | 123624 AGBL1     | 3759    | 20.724 | 3.154   |
| 50071 A09 | M-013928- family with   | 116496 FAM129A   | 2869    | 10.526 | 7.044   |
| 50071 A10 | M-016270- non imprin    | 123606 NIPA1     | 2451    | 9.0983 | 8.4717  |
| 50071 A11 | M-005663- MAS-relate    | 116512 MRGPRD    | 3462    | 17.62  | 0.05    |
| 50071 A12 | M-015473- chromoson     | 123591 C15orf27  | 2253    | 16.822 | 0.748   |
| 50071 A13 | M-012970- apolipopro    | 116519 APOA5     | 3062    | 12.998 | 4.572   |
| 50071 A14 | M-019368- leucine rich  | 123355 LRRC28    | 2548    | 9.3014 | 8.2686  |
| 50071 A15 | M-005664- MAS-relate    | 116534 MRGPPE    | 3664    | 11.245 | 6.325   |
| 50071 A16 | M-030423- HIG1 doma     | 123346 HIGD2BP   | 4154    | 7.8479 | 9.7221  |
| 50071 A17 | M-012941- mitochond     | 116540 MRPL53    | 3627    | 11.856 | 5.714   |
| 50071 A18 | M-015734- threonyl-tR   | 123283 TARSL2    | 1818    | 12.651 | 4.919   |
| 50071 A19 | M-017497- mitochond     | 116541 MRPL54    | 2584    | 9.017  | 8.553   |
| 50071 A20 | M-018553- organic sol   | 123264 OSTbeta   | 2916    | 9.1907 | 8.3793  |
| 50071 A21 | M-017539- heat shock    | 116835 HSPA12B   | 3331    | 11.048 | 6.522   |
| 50071 A23 | M-015194- centrobin, i  | 116840 CNTROB    | 2155    | 14.617 | 2.953   |
| 50071 B02 | M-015950- DC-STAMP      | 127579 DCST2     | 4753    | 10.057 | 7.513   |
| 50071 B04 | M-007126- zinc finger i | 127557 ZBTB8     | 5212    | 16.309 | 1.261   |
| 50071 B05 | M-015689- chromoson     | 123775 C16orf46  | 5696    | 14.203 | 3.367   |
| 50071 B06 | M-010203- IBR domair    | 127544 IBRDC3    | 5471    | 15.08  | 2.49    |
| 50071 B07 | M-018383- N-terminal    | 123803 NTAN1     | 4574    | 19.808 | 2.238   |
| 50071 B08 | M-016743- high-mobili   | 127540 HMGB4     | 2857    | 7.2104 | 10.3596 |
| 50071 B09 | M-016243- chromoson     | 123811 C16orf63  | 3073    | 20.404 | 2.834   |
| 50071 B10 | M-016072- leucine rich  | 127495 LRRC39    | 2736    | 23.026 | 5.456   |
| 50071 B11 | M-018358- leucine rich  | 123872 LRRC50    | 3002    | 15.09  | 2.48    |
| 50071 B12 | M-027457- S100 calciu   | 127482 S100A7L2  | 2798    | 15.082 | 2.488   |
| 50071 B13 | M-022500- hypothetic    | 123876 LOC123876 | 3142    | 30.172 | 12.602  |
| 50071 B14 | M-027142- podocan       | 127435 PODN      | 2431    | 19.457 | 1.887   |
| 50071 B15 | M-018390- DCN1, defe    | 123879 DCUN1D3   | 3408    | 17.371 | 0.199   |
| 50071 B16 | M-015486- chromoson     | 127428 C1orf83   | 2316    | 9.3264 | 8.2436  |
| 50071 B17 | M-015694- zymogen g     | 123887 ZG16      | 2966    | 9.0695 | 8.5005  |
| 50071 B18 | M-016658- zinc finger   | 127396 ZNF684    | 3043    | 8.9057 | 8.6643  |
| 50071 B19 | M-027207- neuritin 1-l  | 123904 NRN1L     | 3823    | 16.008 | 1.562   |
| 50071 B20 | M-017479- diencephal    | 127343 DMBX1     | 5103    | 17.558 | 0.012   |
| 50071 B21 | M-010752- CKLF-like IV  | 123920 CMTM3     | 3996    | 9.7598 | 7.8102  |
| 50071 B23 | M-016247- chromoson     | 123970 C16orf78  | 3779    | 5.9804 | 11.5896 |
| 50071 C02 | M-009633- mitochond     | 123263 MTFMT     | 6291    | 16.309 | 1.261   |
| 50071 C04 | M-004071- SUMO/sen      | 123228 SENP8     | 5242    | 26.555 | 8.985   |
| 50071 C05 | M-015195- chromoson     | 116841 C1orf142  | 6512    | 19.103 | 1.533   |
| 50071 C06 | M-016276- chromoson     | 123207 C15orf40  | 4854    | 15.595 | 1.975   |
| 50071 C07 | M-015178- liver expre   | 116842 LEAP2     | 3824    | 17.939 | 0.369   |
| 50071 C08 | M-016579- Leo1, Paf1,   | 123169 LEO1      | 3122    | 14.061 | 3.509   |

|                  |                               |                       |             |               |               |
|------------------|-------------------------------|-----------------------|-------------|---------------|---------------|
| 50071 C09        | M-013459- chromosom           | 116843 C6orf192       | 3537        | 24.936        | 7.366         |
| <b>50071 C10</b> | <b>M-010296- degenerati</b>   | <b>123099 DEGS2</b>   | <b>3659</b> | <b>32.905</b> | <b>15.335</b> |
| 50071 C11        | M-015179- leucine-rich        | 116844 LRG1           | 2960        | 14.865        | 2.705         |
| 50071 C12        | M-007318- solute carri        | 123096 SLC25A29       | 2917        | 22.969        | 5.399         |
| 50071 C13        | M-017917- mediator o          | 116931 MED12L         | 2579        | 25.94         | 8.37          |
| 50071 C14        | M-007467- solute carri        | 123041 SLC24A4        | 2932        | 14.393        | 3.177         |
| 50071 C15        | M-017538- WD repeat           | 116966 WDR17          | 2656        | 23.532        | 5.962         |
| 50071 C16        | M-018293- membrane            | 123036 MTAC2D1        | 2759        | 14.172        | 3.398         |
| <b>50071 C17</b> | <b>M-008772- ADP-ribosy</b>   | <b>116969 ART5</b>    | <b>3650</b> | <b>39.452</b> | <b>21.882</b> |
| 50071 C18        | M-021417- tetratricop         | 123016 TTC8           | 5006        | 36.656        | 19.086        |
| 50071 C19        | M-014644- centaurin, l        | 116983 CENTB5         | 4285        | 20.747        | 3.177         |
| 50071 C20        | M-008999- acyl-CoA th         | 122970 ACOT4          | 4858        | 14.903        | 2.667         |
| 50071 C21        | M-009302- centaurin, c        | 116984 CENTD1         | 6288        | 29.628        | 12.058        |
| 50071 C23        | M-009136- centaurin, c        | 116985 CENTD2         | 2915        | 9.2624        | 8.3076        |
| 50071 D02        | M-017014- myomesin            | 127294 MYOM3          | 5860        | 9.6587        | 7.9113        |
| 50071 D04        | M-015867- chromosom           | 127281 C1orf93        | 5359        | 13.006        | 4.564         |
| 50071 D05        | M-018294- spermatog           | 124044 SPATA2L        | 4808        | 16.057        | 1.513         |
| 50071 D06        | M-019381- family with         | 127262 FAM79A         | 5262        | 13.417        | 4.153         |
| 50071 D07        | M-016431- chromosom           | 124045 C16orf55       | 4451        | 15.794        | 1.776         |
| 50071 D08        | M-016012- leucine rich        | 127255 LRRC44         | 4491        | 9.6192        | 7.9508        |
| 50071 D09        | M-016237- NADPH oxi           | 124056 NOXO1          | 3633        | 13.185        | 4.385         |
| 50071 D10        | M-021809- chromosom           | 127254 C1orf173       | 3291        | 26.77         | 9.2           |
| 50071 D11        | M-018400- coiled-coil         | 124093 CCDC78         | 3362        | 22.606        | 5.036         |
| 50071 D12        | M-021604- tRNA- $\gamma$ W s  | 127253 TYW3           | 2928        | 24.966        | 7.396         |
| 50071 D13        | M-016410- IQ motif co         | 124152 IQCK           | 2966        | 22.994        | 5.424         |
| 50071 D14        | M-015284- ankyrin rep         | 127247 ASB17          | 4157        | 20.399        | 2.829         |
| 50071 D15        | M-016197- hypothetic          | 124216 LOC124216      | 3558        | 19.562        | 1.992         |
| 50071 D16        | M-017569- ATPase, H+          | 127124 ATP6V1G3       | 2731        | 30.135        | 12.565        |
| 50071 D17        | M-008923- hypothetic          | 124221 MGC52282       | 4146        | 15.292        | 2.278         |
| 50071 D18        | M-008388- lysophosph          | 127018 LYPLAL1        | 4807        | 25.4          | 7.83          |
| 50071 D19        | M-007910- progestin a         | 124222 PAQR4          | 4572        | 28.346        | 10.776        |
| <b>50071 D20</b> | <b>M-018376- ataxin 7-lik</b> | <b>127002 ATXN7L2</b> | <b>6795</b> | <b>35.305</b> | <b>17.735</b> |
| 50071 D21        | M-018285- conserved           | 124245 NHN1           | 4842        | 12.144        | 5.426         |
| 50071 D23        | M-008755- chromodor           | 124359 CDYL2          | 6417        | 21.879        | 4.309         |
| 50071 E02        | M-019329- iron-sulfur         | 122961 ISCA2          | 6775        | 17.476        | 0.094         |
| 50071 E04        | M-008321- jun dimeriz         | 122953 JDP2           | 4015        | 14.545        | 3.025         |
| 50071 E05        | M-021010- centaurin, j        | 116986 CENTG1         | 5110        | 18.16         | 0.59          |
| 50071 E06        | M-016576- chromosom           | 122945 C14orf148      | 6841        | 27.525        | 9.955         |
| 50071 E07        | M-020452- centaurin, j        | 116987 CENTG2         | 5795        | 24.884        | 7.314         |
| 50071 E08        | M-009027- glycoprotei         | 122876 GPHB5          | 4467        | 21.379        | 3.809         |
| 50071 E09        | M-019127- centaurin, j        | 116988 CENTG3         | 4309        | 22.627        | 5.057         |
| 50071 E10        | M-009961- N-acetyltra         | 122830 NAT12          | 3745        | 20.134        | 2.564         |
| 50071 E11        | M-026274- paired rela         | 117065 PRRXL1         | 2643        | 22.247        | 4.677         |
| 50071 E12        | M-016437- FERM dom            | 122786 FRMD6          | 3088        | 14.67         | 2.9           |
| 50071 E13        | M-015196- transcriptic        | 117143 TADA1L         | 3127        | 31.148        | 13.578        |
| 50071 E14        | M-016665- kelch doma          | 122773 KLHDC1         | 2817        | 21.157        | 3.587         |
| 50071 E15        | M-008604- thioesteras         | 117145 THEM4          | 3858        | 26.672        | 9.102         |

|                  |                              |                       |             |               |               |
|------------------|------------------------------|-----------------------|-------------|---------------|---------------|
| 50071 E16        | M-016820- peptidylprc        | 122769 PPIL5          | 4404        | 28.906        | 11.336        |
| 50071 E17        | M-021296- melanoma           | 117153 MIA2           | 3956        | 17.341        | 0.229         |
| 50071 E18        | M-019012- mitochond          | 122704 MRPL52         | 3697        | 26.751        | 9.181         |
| 50071 E19        | M-015201- SH2 domai          | 117157 SH2D1B         | 4635        | 28.328        | 10.758        |
| 50071 E20        | M-017155- ribonuclea         | 122665 RNASE8         | 3610        | 27.784        | 10.214        |
| 50071 E21        | M-015202- dermcidin          | 117159 DCD            | 3247        | 23.221        | 5.651         |
| 50071 E23        | M-012920- WAP, follis        | 117166 WFIKKN1        | 5261        | 26.136        | 8.566         |
| 50071 F02        | M-015949- solute carri       | 126969 SLC44A3        | 6760        | 19.822        | 2.252         |
| 50071 F04        | M-019097- histone clu        | 126961 HIST2H3C       | 5266        | 22.826        | 5.256         |
| 50071 F05        | M-022621- ankyrin rep        | 124401 ANKS3          | 5193        | 12.382        | 5.188         |
| 50071 F06        | M-022072- hypothetic         | 126917 LOC126917      | 5527        | 19.794        | 2.224         |
| 50071 F07        | M-015987- family with        | 124402 FAM100A        | 2463        | 12.992        | 4.578         |
| 50071 F08        | M-016839- chromoson          | 126868 C1orf161       | 3774        | 17.276        | 0.294         |
| 50071 F09        | M-016227- septin 12          | 124404 SEPT12         | 4342        | 13.058        | 4.512         |
| 50071 F10        | M-019223- chromoson          | 126859 C1orf125       | 4758        | 15.027        | 2.543         |
| 50071 F11        | M-022814- zinc finger        | 124411 ZNF720         | 3812        | 14.166        | 3.404         |
| 50071 F12        | M-016017- kelch/anky         | 126823 KARCA1         | 3176        | 16.782        | 0.788         |
| 50071 F13        | M-003993- hypothetic         | 124446 LOC124446      | 2671        | 28.866        | 11.296        |
| 50071 F14        | M-016848- WD repeat          | 126820 WDR63          | 3475        | 21.842        | 4.272         |
| 50071 F15        | M-016514- selectin lig       | 124460 SLIC1          | 4198        | 20.01         | 2.44          |
| 50071 F16        | M-021340- UDP-Gal:be         | 126792 B3GALT6        | 2803        | 18.195        | 0.625         |
| 50071 F17        | M-015996- transmemk          | 124491 TMEM170        | 3945        | 16.705        | 0.865         |
| 50071 F18        | M-016667- pseudouric         | 126789 PUSL1          | 5227        | 26.344        | 8.774         |
| 50071 F19        | M-023220- heat shock         | 124535 HSF5           | 5512        | 26.379        | 8.809         |
| 50071 F20        | M-022158- leucine rich       | 126755 LRRC38         | 5477        | 27.186        | 9.616         |
| 50071 F21        | M-017248- musashi hc         | 124540 MSI2           | 6325        | 26.719        | 9.149         |
| 50071 F23        | M-007359- hypothetic         | 124565 MGC15523       | 5220        | 28.831        | 11.261        |
| 50071 G02        | M-017754- tubulin pol        | 122664 TPPP2          | 6438        | 14.647        | 2.923         |
| 50071 G04        | M-015958- ribonuclea         | 122651 RNASE11        | 6335        | 22.194        | 4.624         |
| 50071 G05        | M-018265- RAB3A inte         | 117177 RAB3IP         | 6436        | 11.498        | 6.072         |
| 50071 G06        | M-010295- phospholip         | 122618 PLD4           | 4793        | 21.823        | 4.253         |
| <b>50071 G07</b> | <b>M-020361- synovial sa</b> | <b>117178 SSX2IP</b>  | <b>6039</b> | <b>29.326</b> | <b>11.756</b> |
| 50071 G08        | M-017761- chromoson          | 122616 C14orf79       | 4562        | 22.753        | 5.183         |
| 50071 G09        | M-010293- HRAS-like s        | 117245 HRASLS5        | 3475        | 13.957        | 3.613         |
| 50071 G10        | M-018297- trafficking        | 122553 TRAPPC6B       | 4235        | 28.689        | 11.119        |
| 50071 G11        | M-013367- FtsJ homol         | 117246 FTSJ3          | 3889        | 27.256        | 9.686         |
| 50071 G12        | M-021950- chromoson          | 122525 C14orf28       | 3163        | 15.302        | 2.268         |
| 50071 G13        | M-007403- solute carri       | 117247 SLC16A10       | 2629        | 18.79         | 1.22          |
| 50071 G14        | M-015934- family with        | 122509 FAM14B         | 3666        | 16.858        | 0.712         |
| <b>50071 G15</b> | <b>M-018649- UDP-N-ace</b>   | <b>117248 GALNTL2</b> | <b>4145</b> | <b>34.596</b> | <b>17.026</b> |
| 50071 G16        | M-015551- ankyrin rep        | 122416 ANKRD9         | 4114        | 19.908        | 2.338         |
| 50071 G17        | M-015208- defensin, b        | 117285 DEFB118        | 4403        | 17.965        | 0.395         |
| 50071 G18        | M-022008- tudor domi         | 122402 TDRD9          | 5293        | 19.686        | 2.116         |
| 50071 G19        | M-008711- T-cell activi      | 117289 TAGAP          | 4656        | 28.651        | 11.081        |
| 50071 G20        | M-015914- chromoson          | 122258 C13orf28       | 6259        | 17.591        | 0.021         |
| 50071 G21        | M-013265- transmemk          | 117532 TMC2           | 3826        | 6.7695        | 10.8005       |
| 50071 G23        | M-010863- relaxin 3          | 117579 RLN3           | 4337        | 15.725        | 1.845         |

|                  |                               |                      |             |               |               |
|------------------|-------------------------------|----------------------|-------------|---------------|---------------|
| 50071 H02        | M-016008- chromoson           | 126731 C1orf96       | 4035        | 13.953        | 3.617         |
| 50071 H04        | M-015599- chromoson           | 126695 C1orf172      | 5275        | 21.043        | 3.473         |
| 50071 H05        | M-019272- Usher synd          | 124590 USH1G         | 4410        | 25.306        | 7.736         |
| 50071 H06        | M-027713- Src homolc          | 126669 SHE           | 4272        | 12.687        | 4.883         |
| 50071 H07        | M-004966- kinesin farr        | 124602 KIF19         | 3715        | 12.948        | 4.622         |
| 50071 H08        | M-018657- tudor domi          | 126668 TDRD10        | 4970        | 17.586        | 0.016         |
| 50071 H09        | M-010687- zona pelluc         | 124626 ZPBP2         | 3666        | 22.586        | 5.016         |
| 50071 H10        | M-021788- hypothetic          | 126661 LOC126661     | 3611        | 30.684        | 13.114        |
| 50071 H11        | M-016224- cytochrom           | 124637 CYB5D1        | 3707        | 13.515        | 4.055         |
| 50071 H12        | M-027449- repetin             | 126638 RPTN          | 3046        | 22.029        | 4.459         |
| <b>50071 H13</b> | <b>M-023019- ubiquitin sp</b> | <b>124739 USP43</b>  | <b>3221</b> | <b>32.971</b> | <b>15.401</b> |
| 50071 H14        | M-016074- hypothetic          | 126626 MGC29891      | 3495        | 26.609        | 9.039         |
| 50071 H15        | M-023016- KRAB-A do           | 124751 KRBA2         | 3207        | 22.95         | 5.38          |
| 50071 H16        | M-023891- KIAA1957            | 126567 KIAA1957      | 4180        | 21.005        | 3.435         |
| 50071 H17        | M-018784- chromoson           | 124773 C17orf64      | 4236        | 21.506        | 3.936         |
| 50071 H18        | M-016461- ankyrin rep         | 126549 ANKRD41       | 4929        | 23.92         | 6.35          |
| 50071 H19        | M-015837- chromoson           | 124783 C17orf46      | 6246        | 33.381        | 15.811        |
| 50071 H20        | M-031244- hypothetic          | 126536 LOC126536     | 4918        | 26.698        | 9.128         |
| 50071 H21        | M-016213- hexamthyl           | 124790 HEXIM2        | 5644        | 29.536        | 11.966        |
| 50071 H23        | M-015641- LSM12 hon           | 124801 LSM12         | 4937        | 18.29         | 0.72          |
| 50071 I02        | M-027206- FLJ40296 p          | 122183 FLJ40296      | 7026        | 15.3          | 2.27          |
| <b>50071 I04</b> | <b>M-018736- SLAIN moti</b>   | <b>122060 SLAIN1</b> | <b>6161</b> | <b>18.731</b> | <b>1.161</b>  |
| 50071 I05        | M-015224- zinc finger         | 117608 ZNF354B       | 5094        | 23.263        | 5.693         |
| 50071 I06        | M-016750- chromoson           | 122046 C13orf26      | 5748        | 13.97         | 3.6           |
| 50071 I07        | M-007121- tripartite r        | 117854 TRIM6         | 5630        | 15.471        | 2.099         |
| 50071 I08        | M-021595- hypothetic          | 121952 LOC121952     | 4414        | 11.192        | 6.378         |
| 50071 I09        | M-015505- chromoson           | 118421 C21orf100     | 6551        | 14.12         | 3.45          |
| 50071 I10        | M-021583- hypothetic          | 121951 FLJ40176      | 5828        | 21.071        | 3.501         |
| 50071 I11        | M-018197- loss of hete        | 118426 LOH12CR1      | 4239        | 7.7377        | 9.8323        |
| 50071 I12        | M-016184- chromoson           | 121793 C13orf16      | 3726        | 10.064        | 7.506         |
| 50071 I13        | M-021637- olfactomec          | 118427 OLFM3         | 3059        | 12.292        | 5.278         |
| 50071 I14        | M-006042- signal pept         | 121665 UNQ1887       | 3287        | 27.746        | 10.176        |
| 50071 I15        | M-015215- anthrax tox         | 118429 ANTXR2        | 4756        | 18.398        | 0.828         |
| 50071 I16        | M-027118- forkhead b          | 121643 FOXN4         | 5258        | 18.334        | 0.764         |
| 50071 I17        | M-003683- small breas         | 118430 SBEM          | 5267        | 19.499        | 1.929         |
| 50071 I18        | M-018551- transmemk           | 121601 TMEM16D       | 5606        | 16.179        | 1.391         |
| 50071 I19        | M-026273- chromoson           | 118461 C10orf71      | 5235        | 14.288        | 3.282         |
| 50071 I20        | M-015774- BTB (POZ) c         | 121551 BTBD11        | 5042        | 10.432        | 7.138         |
| 50071 I21        | M-027286- proline-rich        | 118471 PRAP1         | 5271        | 14.437        | 3.133         |
| 50071 I23        | M-018086- zinc finger         | 118472 ZNF511        | 6716        | 13.386        | 4.184         |
| 50071 J02        | M-018555- chromoson           | 126526 C19orf47      | 3705        | 16.977        | 0.593         |
| 50071 J04        | M-023896- hypothetic          | 126520 LOC126520     | 3067        | 11.933        | 5.637         |
| 50071 J05        | M-016216- coiled-coil         | 124808 CCDC43        | 5702        | 26.64         | 9.07          |
| 50071 J06        | M-018558- F-box prote         | 126433 FBXO27        | 5432        | 16.09         | 1.48          |
| 50071 J07        | M-018405- cyclin N-ter        | 124817 CNTD1         | 2781        | 18.339        | 0.769         |
| 50071 J08        | M-027209- FLJ45909 p          | 126432 FLJ45909      | 3615        | 16.155        | 1.415         |
| 50071 J09        | M-023299- transmemk           | 124842 TMEM132E      | 4839        | 19.591        | 2.021         |



|           |                        |                  |      |        |         |
|-----------|------------------------|------------------|------|--------|---------|
| 50071 J10 | M-008905- cytochrom    | 126410 CYP4F22   | 4301 | 27.482 | 9.912   |
| 50071 J11 | M-019227- WAP, follis  | 124857 WFIKKN2   | 3823 | 22.495 | 4.925   |
| 50071 J12 | M-018427- coiled-coil  | 126402 CCDC105   | 4217 | 24.069 | 6.499   |
| 50071 J13 | M-016054- beta-1,4-N   | 124872 B4GALNT2  | 3775 | 11.841 | 5.729   |
| 50071 J14 | M-009224- heat shock   | 126393 HSPB6     | 3673 | 24.694 | 7.124   |
| 50071 J15 | M-017764- sperm acro   | 124912 SPACA3    | 4873 | 22.963 | 5.393   |
| 50071 J16 | M-017942- zinc finger  | 126375 ZNF792    | 5262 | 16.724 | 0.846   |
| 50071 J17 | M-008080- seizure rela | 124925 SEZ6      | 4979 | 19.482 | 1.912   |
| 50071 J18 | M-015998- leucine rich | 126364 LRRC25    | 4485 | 15.719 | 1.851   |
| 50071 J19 | M-018787- ankyrin rep  | 124930 ANKRD13B  | 6599 | 15.199 | 2.371   |
| 50071 J20 | M-018420- chromoson    | 126353 C19orf21  | 5596 | 19.425 | 1.855   |
| 50071 J21 | M-016443- solute carri | 124935 SLC43A2   | 5407 | 14.888 | 2.682   |
| 50071 J23 | M-004706- cytochrom    | 124936 CYB5D2    | 5971 | 12.376 | 5.194   |
| 50071 K02 | M-026940- achaete-sci  | 121549 ASCL4     | 5531 | 14.482 | 3.088   |
| 50071 K04 | M-007123- FYVE, RhoG   | 121512 FGD4      | 5754 | 11.436 | 6.134   |
| 50071 K05 | M-027351- coiled-coil- | 118487 CHCHD1    | 5875 | 15.132 | 2.438   |
| 50071 K06 | M-015698- endoplasm    | 121506 ERP27     | 6364 | 13.891 | 3.679   |
| 50071 K07 | M-018243- zinc finger, | 118490 ZMYND17   | 5792 | 16.575 | 0.995   |
| 50071 K08 | M-019233- histone clu  | 121504 HIST4H4   | 4464 | 13.284 | 4.286   |
| 50071 K09 | M-016390- tetratricop  | 118491 TTC18     | 6095 | 16.768 | 0.802   |
| 50071 K10 | M-008306- neural prec  | 121441 NEDD1     | 2743 | 18.666 | 1.096   |
| 50071 K11 | M-026375- chromoson    | 118611 C10orf90  | 3918 | 11.409 | 6.161   |
| 50071 K12 | M-017998- keratin 74   | 121391 KRT74     | 3792 | 24.736 | 7.166   |
| 50071 K13 | M-016301- BTB (POZ) c  | 118663 BTBD16    | 2512 | 14.57  | 3       |
| 50071 K14 | M-016283- family with  | 121355 FAM112B   | 4420 | 11.29  | 6.28    |
| 50071 K15 | M-016512- phosphose    | 118672 PSTK      | 3780 | 14.921 | 2.649   |
| 50071 K16 | M-008305- tryptophan   | 121278 TPH2      | 5318 | 20.666 | 3.096   |
| 50071 K17 | M-016290- zinc finger  | 118738 ZNF488    | 5169 | 17.392 | 0.178   |
| 50071 K18 | M-007122- zinc finger  | 121274 ZNF641    | 3947 | 10.084 | 7.486   |
| 50071 K19 | M-018541- chromoson    | 118812 C10orf83  | 5506 | 17.508 | 0.062   |
| 50071 K20 | M-015959- chromoson    | 121273 C12orf54  | 5689 | 22.06  | 4.49    |
| 50071 K21 | M-016349- zinc finger, | 118813 ZFYVE27   | 5682 | 6.9342 | 10.6358 |
| 50071 K23 | M-018735- catechol-O   | 118881 COMTD1    | 6431 | 6.4998 | 11.0702 |
| 50071 L02 | M-018508- NADH dehy    | 126328 NDUFA11   | 6592 | 19.463 | 1.893   |
| 50071 L04 | M-015416- GIPC PDZ d   | 126326 GIPC3     | 6750 | 21.822 | 4.252   |
| 50071 L05 | M-023008- chromoson    | 124944 C17orf49  | 6641 | 30.854 | 13.284  |
| 50071 L06 | M-018417- chromoson    | 126321 C19orf28  | 7422 | 31.393 | 13.823  |
| 50071 L07 | M-016831- zinc finger  | 124961 ZFP3      | 5891 | 18.723 | 1.153   |
| 50071 L08 | M-015299- MOB1, Mp     | 126308 MOBKL2A   | 2661 | 25.554 | 7.984   |
| 50071 L09 | M-016666- gamma-glu    | 124975 GGT6      | 5902 | 34.141 | 16.571  |
| 50071 L10 | M-021303- junctional s | 126306 JSRP1     | 5573 | 48.143 | 30.573  |
| 50071 L11 | M-007344- spinster ho  | 124976 SPNS2     | 4407 | 16.928 | 0.642   |
| 50071 L12 | M-018656- zinc finger  | 126299 ZNF428    | 4147 | 9.4044 | 8.1656  |
| 50071 L13 | M-018295- chromoson    | 124989 C17orf57  | 3371 | 22.872 | 5.302   |
| 50071 L14 | M-007125- zinc finger  | 126295 ZNF57     | 4803 | 17.635 | 0.065   |
| 50071 L15 | M-017394- mitochond    | 124995 MRPL10    | 5130 | 28.304 | 10.734  |
| 50071 L16 | M-016446- tumor necr   | 126282 TNFAIP8L1 | 5640 | 17.128 | 0.442   |

|           |                        |                  |      |        |         |
|-----------|------------------------|------------------|------|--------|---------|
| 50071 L17 | M-016825- WD repeat    | 124997 WDR81     | 5600 | 21.214 | 3.644   |
| 50071 L18 | M-016537- EP300 inter  | 126272 EID2B     | 5774 | 15.778 | 1.792   |
| 50071 L19 | M-019420- TBC1 doma    | 125058 TBC1D16   | 6324 | 19.133 | 1.563   |
| 50071 L20 | M-016089- transmembr   | 126259 TMIGD2    | 5524 | 20.293 | 2.723   |
| 50071 L21 | M-016720- gap junctio  | 125111 GJC1      | 7242 | 12.842 | 4.728   |
| 50071 L23 | M-016589- keratin 222  | 125113 KRT222P   | 5713 | 6.9666 | 10.6034 |
| 50071 M02 | M-008778- Ras homolo   | 121268 RHEBL1    | 6139 | 11.81  | 5.76    |
| 50071 M04 | M-007401- solute carri | 121260 SLC15A4   | 5762 | 27.317 | 9.747   |
| 50071 M05 | M-016293- ankyrin rep  | 118932 ANKRD22   | 7339 | 26.202 | 8.632   |
| 50071 M06 | M-027087- transmembr   | 121256 TMEM132I  | 7000 | 30.414 | 12.844  |
| 50071 M07 | M-018547- sideroflexin | 118980 SFXN2     | 6730 | 20.312 | 2.742   |
| 50071 M08 | M-016513- leucine-rich | 121227 LRIG3     | 6839 | 29.727 | 12.157  |
| 50071 M09 | M-018369- PDZ domain   | 118987 PDZD8     | 5716 | 26.382 | 8.812   |
| 50071 M10 | M-008855- orphan shc   | 121214 SDR-O     | 6093 | 24.175 | 6.605   |
| 50071 M11 | M-015345- centaurin, p | 119016 CTGLF1    | 5929 | 28.15  | 10.58   |
| 50071 M12 | M-016009- chromosom    | 121053 C12orf45  | 5285 | 29.063 | 11.493  |
| 50071 M13 | M-016288- chromosom    | 119032 C10orf32  | 4127 | 20.257 | 2.687   |
| 50071 M14 | M-026954- hypothetic   | 121006 LOC121006 | 4140 | 26.208 | 8.638   |
| 50071 M15 | M-019380- lysozyme-li  | 119180 LYZL2     | 5918 | 17.945 | 0.375   |
| 50071 M16 | M-016013- chromosom    | 120939 C12orf59  | 6332 | 17.925 | 0.355   |
| 50071 M17 | M-026289- KIAA1975 p   | 119385 KIAA1975  | 6583 | 23.333 | 5.763   |
| 50071 M18 | M-018642- coiled-coil  | 120935 CCDC38    | 6310 | 17.195 | 0.375   |
| 50071 M19 | M-026311- glutathione  | 119391 GSTO2     | 5978 | 20.91  | 3.34    |
| 50071 M20 | M-006323- leucine-rich | 120892 LRRK2     | 6018 | 22.35  | 4.78    |
| 50071 M21 | M-015697- chromosom    | 119392 C10orf78  | 6458 | 20.316 | 2.746   |
| 50071 M23 | M-018828- family with  | 119395 FAM26A    | 5899 | 19.715 | 2.145   |
| 50071 N02 | M-018414- WD repeat    | 126248 WDR88     | 5024 | 12.5   | 5.07    |
| 50071 N04 | M-016620- zinc finger  | 126231 ZNF573    | 5134 | 11.94  | 5.63    |
| 50071 N05 | M-018643- keratin 40   | 125115 KRT40     | 6133 | 15.033 | 2.537   |
| 50071 N06 | M-023823- zinc finger  | 126208 ZNF787    | 6508 | 16.334 | 1.236   |
| 50071 N07 | M-016543- chromosom    | 125144 C17orf45  | 6501 | 18.274 | 0.704   |
| 50071 N08 | M-019146- NLR family,  | 126206 NLRP5     | 6416 | 19.031 | 1.461   |
| 50071 N09 | M-017272- Smith-Mag    | 125170 SMCR7     | 6420 | 16.573 | 0.997   |
| 50071 N10 | M-023659- hypothetic   | 126167 LOC126167 | 5563 | 11.541 | 6.029   |
| 50071 N11 | M-007333- solute carri | 125206 SLC5A10   | 5307 | 19.823 | 2.253   |
| 50071 N12 | M-016814- hypothetic   | 126147 LOC126147 | 4150 | 14.289 | 3.281   |
| 50071 N13 | M-015626- chromosom    | 125228 C18orf19  | 5470 | 22.431 | 4.861   |
| 50071 N14 | M-008646- aldehyde d   | 126133 ALDH16A1  | 6077 | 22.429 | 4.859   |
| 50071 N15 | M-007124- lipoxygena   | 125336 LOXHD1    | 5734 | 6.9759 | 10.5941 |
| 50071 N16 | M-008824- carnitine p  | 126129 CPT1C     | 4954 | 8.3569 | 9.2131  |
| 50071 N17 | M-019327- chromosom    | 125476 C18orf37  | 5221 | 8.9063 | 8.6637  |
| 50071 N18 | M-016815- chromosom    | 126123 C19orf41  | 5166 | 14.131 | 3.439   |
| 50071 N19 | M-016915- chromosom    | 125488 C18orf17  | 6240 | 19.423 | 1.853   |
| 50071 N20 | M-015500- Josephin d   | 126119 JOSD2     | 5931 | 16.911 | 0.659   |
| 50071 N21 | M-015524- claudin dor  | 125875 CLDND2    | 4429 | 10.07  | 7.5     |
| 50071 N23 | M-023813- zinc finger  | 125893 ZNF816A   | 4876 | 11.792 | 5.778   |
| 50071 O02 | M-016039- DEP domain   | 120863 DEPDC4    | 6003 | 18.407 | 0.837   |

|           |                        |                  |      |        |         |
|-----------|------------------------|------------------|------|--------|---------|
| 50071 O04 | M-015992- chromoson    | 120534 C11orf46  | 5634 | 21.246 | 3.676   |
| 50071 O05 | M-016086- clarin 3     | 119467 CLRN3     | 5560 | 19.209 | 1.639   |
| 50071 O06 | M-008875- DPH4, JJJ3   | 120526 DPH4      | 5197 | 14.835 | 2.735   |
| 50071 O07 | M-018378- chromoson    | 119504 C10orf104 | 5305 | 15.834 | 1.736   |
| 50071 O08 | M-016407- adhesion r   | 120425 AMICA1    | 4925 | 12.995 | 4.575   |
| 50071 O09 | M-010294- pancreatic   | 119548 PNLIPRP3  | 5236 | 13.541 | 4.029   |
| 50071 O10 | M-018588- family with  | 120406 FAM55B    | 4978 | 27.802 | 10.232  |
| 50071 O11 | M-018237- sideroflexir | 119559 SFXN4     | 4030 | 18.362 | 0.792   |
| 50071 O12 | M-015986- family with  | 120400 FAM55A    | 3440 | 8.8081 | 8.7619  |
| 50071 O13 | M-005927- carboxypep   | 119587 CPXM2     | 3664 | 12.364 | 5.206   |
| 50071 O14 | M-016573- PIH1 doma    | 120379 PIH1D2    | 4352 | 20.404 | 2.834   |
| 50071 O15 | M-016572- chromoson    | 119710 C11orf74  | 4287 | 10.054 | 7.516   |
| 50071 O16 | M-026516- hypothetic   | 120376 LOC120376 | 4457 | 15.033 | 2.537   |
| 50071 O17 | M-019367- glycosyltra  | 120071 GYLTL1B   | 5486 | 12.742 | 4.828   |
| 50071 O18 | M-014351- cytochrom    | 120227 CYP2R1    | 4451 | 10.47  | 7.1     |
| 50071 O19 | M-007553- solute carri | 120103 SLC36A4   | 5656 | 12.801 | 4.769   |
| 50071 O20 | M-018706- transmemk    | 120224 TMEM45B   | 5425 | 10.286 | 7.284   |
| 50071 O21 | M-026743- FAT tumor    | 120114 FAT3      | 5188 | 13.763 | 3.807   |
| 50071 O23 | M-015982- chromoson    | 120196 C11orf69  | 4851 | 5.5452 | 12.0248 |
| 50071 P02 | M-017913- chromoson    | 126074 C19orf39  | 3528 | 11.933 | 5.637   |
| 50071 P04 | M-016889- zinc finger  | 126070 ZNF440    | 3689 | 14.367 | 3.203   |
| 50071 P05 | M-023828- zinc finger  | 125919 ZNF543    | 2770 | 19.783 | 2.213   |
| 50071 P06 | M-018758- zinc finger  | 126069 ZNF491    | 5449 | 24.225 | 6.655   |
| 50071 P07 | M-027208- carcinoeml   | 125931 CEACAM20  | 2351 | 12.42  | 5.15    |
| 50071 P08 | M-016909- zinc finger  | 126068 ZNF441    | 4779 | 15.589 | 1.981   |
| 50071 P09 | M-015346- ribonucleo   | 125950 RAVR1     | 3964 | 17.255 | 0.315   |
| 50071 P10 | M-024078- Purkinje ce  | 126006 PCP2      | 4342 | 8.5675 | 9.0025  |
| 50071 P11 | M-019413- cytochrom    | 125965 COX6B2    | 4930 | 16.471 | 1.099   |
| 50071 P12 | M-024079- trafficking  | 126003 TRAPPC5   | 4577 | 11.427 | 6.143   |
| 50071 P13 | M-013004- exosome c    | 118460 EXOSC6    | 3103 | 17.241 | 0.329   |
| 50071 P14 | M-017360- methyl-CpC   | 125997 MBD3L2    | 3944 | 15.847 | 1.723   |
| 50071 P15 | M-015213- gene differ  | 118425 GDEP      | 5113 | 17.759 | 0.189   |
| 50071 P16 | M-031920- hypothetic   | 125988 P117      | 4704 | 15.115 | 2.455   |
| 50071 P17 | M-016408- IKK interac  | 121457 IKIP      | 4935 | 22.796 | 5.226   |
| 50071 P18 | M-010298- N-acylsphir  | 125981 ASAH3     | 5353 | 11.732 | 5.838   |
| 50071 P19 | M-012971- ribosomal    | 116832 RPL39L    | 3494 | 12.936 | 4.634   |
| 50071 P20 | M-016230- calreticulin | 125972 CALR3     | 4882 | 25.317 | 7.747   |
| 50071 P21 | M-016922- junction-m   | 133746 JMY       | 4668 | 19.537 | 1.967   |
| 50071 P23 | M-032031- zinc finger  | 133923 ZNF474    | 3514 | 14.798 | 2.772   |
|           |                        | mdn              | 4662 | 17.572 | 4.568   |
|           |                        | 3MAD             |      |        | 13.704  |
|           |                        | MADc             |      |        | 6.76064 |
| 50071 C22 |                        |                  | 2681 | 16.039 |         |
| 50071 D22 |                        |                  | 2817 | 10.082 |         |
| 50071 E22 |                        |                  | 1680 | 15.595 |         |

|           |  |           |          |          |
|-----------|--|-----------|----------|----------|
| 50071 F22 |  |           | 3227     | 9.3275   |
|           |  | mn        | 2601.25  | 12.76088 |
|           |  | sd        | 656.5498 | 3.546961 |
| 50071 G22 |  |           | 4125     | 47.345   |
| 50071 I22 |  |           | 5019     | 49.173   |
| 50071 H22 |  |           | 6714     | 56.315   |
| 50071 J22 |  |           | 6516     | 50.89    |
|           |  | mn        | 5593.5   | 50.93075 |
|           |  | sd        | 1237.345 | 3.870362 |
|           |  | 3psSD     |          | 11.61108 |
|           |  | 3ngSD     |          | 10.64088 |
|           |  | SumSD     |          | 22.25197 |
|           |  | DiffMn    |          | 38.16988 |
|           |  | SmovrDiff |          | 0.582972 |
|           |  | 1minus    |          | 0.417028 |

|           |                        |                |      |        |
|-----------|------------------------|----------------|------|--------|
| 50071 G03 | M-003290- polo-like ki | 5347 PLK1 SMAR | 1482 | 40.013 |
| 50071 H03 | M-003290- polo-like ki | 5347 PLK1 SMAR | 1120 | 41.518 |

|           |                                     |  |      |        |
|-----------|-------------------------------------|--|------|--------|
| 50071 J03 | D-001206- : siControl non-targetinç |  | 3438 | 39.122 |
| 50071 I03 | D-001206- : siControl non-targetinç |  | 6104 | 45.724 |

|           |                                  |  |      |        |
|-----------|----------------------------------|--|------|--------|
| 50071 K03 | D-001600-( siGLO RISC-free siRNA |  | 7540 | 46.22  |
| 50071 L03 | D-001600-( siGLO RISC-free siRNA |  | 6864 | 49.985 |

| rZ       | cell ct | % inf  | AD     | rZ       | cell ct | % inf  | AD     | rZ       |
|----------|---------|--------|--------|----------|---------|--------|--------|----------|
| 0.527761 | 2435    | 4.4764 | 6.4736 | -1.2999  | 3561    | 14.575 | 5.035  | 1.185287 |
| -0.47569 | 2826    | 11.359 | 0.409  | 0.081274 | 2908    | 8.4594 | 1.0806 | -0.25474 |
| 1.590086 | 3635    | 19.037 | 8.087  | 1.622063 | 3560    | 18.511 | 8.971  | 2.11209  |
| -1.41617 | 2147    | 9.9674 | 0.9826 | -0.19799 | 2261    | 6.7669 | 2.7731 | -0.65327 |
| -0.86856 | 2867    | 6.0342 | 4.9158 | -0.98729 | 2219    | 10.41  | 0.87   | 0.204563 |
| 0.466228 | 3534    | 13.016 | 2.066  | 0.413794 | 4068    | 15.069 | 5.529  | 1.301609 |
| -1.04221 | 2369    | 3.588  | 7.362  | -1.47818 | 1949    | 7.3884 | 2.1516 | -0.50693 |
| -1.25339 | 1971    | 3.9574 | 6.9926 | -1.40405 | 2556    | 8.6463 | 0.8937 | -0.21073 |
| 0.0071   | 2745    | 9.5811 | 1.3689 | -0.27551 | 2207    | 15.134 | 5.594  | 1.316914 |
| -0.11094 | 2875    | 9.6    | 1.35   | -0.27172 | 2104    | 9.981  | 0.441  | 0.103547 |
| -0.67656 | 2284    | 9.1506 | 1.7994 | -0.3619  | 2474    | 10.348 | 0.808  | 0.189964 |
| -1.22335 | 2948    | 9.498  | 1.452  | -0.29218 | 3732    | 15.648 | 6.108  | 1.437945 |
| -0.93586 | 3507    | 8.982  | 1.968  | -0.39573 | 3229    | 8.7953 | 0.7447 | -0.17565 |
| -1.43834 | 2900    | 5.3793 | 5.5707 | -1.11871 | 3920    | 5.2551 | 4.2849 | -1.00925 |
| -0.84548 | 2913    | 8.5136 | 2.4364 | -0.48973 | 4553    | 12.937 | 3.397  | 0.799591 |
| -0.72789 | 2796    | 16.953 | 6.003  | 1.203855 | 2337    | 9.5421 | 0.0021 | 0.0002   |
| -1.26541 | 2727    | 17.565 | 6.615  | 1.326668 | 4191    | 13.648 | 4.108  | 0.967009 |
| -1.23972 | 2665    | 11.107 | 0.157  | 0.030703 | 4181    | 7.1992 | 2.3408 | -0.55148 |
| -0.965   | 3355    | 21.252 | 10.302 | 2.06656  | 3863    | 11.157 | 1.617  | 0.380458 |
| -0.43709 | 2928    | 12.568 | 1.618  | 0.323891 | 4502    | 9.0849 | 0.4551 | -0.10746 |
| -1.11158 | 5200    | 2.9808 | 7.9692 | -1.60003 | 4003    | 9.5678 | 0.0278 | 0.006252 |
| -0.18682 | 4317    | 4.2622 | 6.6878 | -1.34288 | 3757    | 7.0535 | 2.4865 | -0.58579 |
| -0.49833 | 5134    | 5.0838 | 5.8662 | -1.17801 | 3606    | 8.7909 | 0.7491 | -0.17668 |
| -0.3686  | 5939    | 6.4826 | 4.4674 | -0.8973  | 4536    | 10.538 | 0.998  | 0.234703 |
| 0.330738 | 5418    | 5.3525 | 5.5975 | -1.12409 | 4303    | 8.7613 | 0.7787 | -0.18365 |
| -1.53264 | 3976    | 2.6157 | 8.3343 | -1.6733  | 2257    | 2.7913 | 6.7487 | -1.5894  |
| 0.418895 | 4616    | 6.4341 | 4.5159 | -0.90703 | 2904    | 7.6791 | 1.8609 | -0.43848 |
| 0.806728 | 6634    | 9.0292 | 1.9208 | -0.38626 | 2875    | 7.7565 | 1.7835 | -0.42025 |
| -0.36713 | 5371    | 4.7105 | 6.2395 | -1.25292 | 2423    | 6.8923 | 2.6477 | -0.62374 |
| -0.36831 | 4332    | 3.8089 | 7.1411 | -1.43385 | 2299    | 8.047  | 1.493  | -0.35185 |
| 1.863729 | 4674    | 13.543 | 2.593  | 0.51955  | 3295    | 13.414 | 3.874  | 0.911909 |
| 0.27882  | 5204    | 9.435  | 1.515  | -0.30483 | 2438    | 8.3675 | 1.1725 | -0.27638 |
| -0.02973 | 3875    | 4.6452 | 6.3048 | -1.26602 | 3310    | 11.511 | 1.971  | 0.463813 |
| -1.21965 | 3249    | 4.7707 | 6.1793 | -1.24084 | 1199    | 12.177 | 2.637  | 0.620635 |
| -1.25765 | 4532    | 3.9276 | 7.0224 | -1.41003 | 2593    | 6.7875 | 2.7525 | -0.64842 |
| -1.28188 | 4399    | 4.9329 | 6.0171 | -1.20829 | 2960    | 6.2838 | 3.2562 | -0.76703 |
| -0.23134 | 4519    | 6.0854 | 4.8646 | -0.97701 | 3386    | 9.1553 | 0.3847 | -0.09088 |
| -0.00207 | 6068    | 12.459 | 1.509  | 0.302017 | 5504    | 13.826 | 4.286  | 1.008922 |
| -1.15554 | 6888    | 12.035 | 1.085  | 0.216931 | 5087    | 11.598 | 2.058  | 0.484299 |
| -1.71457 | 6345    | 11.6   | 0.65   | 0.129637 | 5532    | 11.153 | 1.613  | 0.379516 |
| -0.18682 | 4908    | 11.084 | 0.134  | 0.026088 | 5171    | 9.5146 | 0.0254 | -0.00628 |
| 1.32872  | 4091    | 17.575 | 6.625  | 1.328675 | 4659    | 17.879 | 8.339  | 1.963274 |
| 0.226458 | 5198    | 10.389 | 0.561  | -0.11338 | 4889    | 16.568 | 7.028  | 1.654575 |
| -0.29243 | 4318    | 7.1561 | 3.7939 | -0.76215 | 3048    | 8.727  | 0.813  | -0.19173 |
| 0.054285 | 4134    | 7.2085 | 3.7415 | -0.75163 | 2655    | 6.4407 | 3.0993 | -0.73008 |
| -0.51933 | 4549    | 10.156 | 0.794  | -0.16014 | 2775    | 5.5495 | 3.9905 | -0.93993 |

|                 |             |               |               |                 |             |               |               |                 |
|-----------------|-------------|---------------|---------------|-----------------|-------------|---------------|---------------|-----------------|
| 1.089246        | 3672        | 9.7222        | 1.2278        | -0.24719        | 3359        | 15.927        | 6.387         | 1.50364         |
| <b>2.267981</b> | <b>3937</b> | <b>17.704</b> | <b>6.754</b>  | <b>1.354562</b> | <b>3089</b> | <b>19.845</b> | <b>10.305</b> | <b>2.426204</b> |
| -0.40041        | 4928        | 11.871        | 0.921         | 0.18402         | 2652        | 8.2579        | 1.2821        | -0.30219        |
| 0.798297        | 3419        | 8.1603        | 2.7897        | -0.56063        | 1904        | 10.819        | 1.279         | 0.300869        |
| 1.237753        | 2534        | 11.8          | 0.85          | 0.169772        | 2561        | 11.714        | 2.174         | 0.511613        |
| -0.47022        | 3022        | 7.2138        | 3.7362        | -0.75057        | 2424        | 8.5396        | 1.0004        | -0.23586        |
| 0.881573        | 4216        | 14.303        | 3.353         | 0.672064        | 2802        | 11.813        | 2.273         | 0.534925        |
| -0.50291        | 3604        | 11.099        | 0.149         | 0.029098        | 2551        | 8.9769        | 0.5631        | -0.13289        |
| <b>3.23638</b>  | <b>3322</b> | <b>21.884</b> | <b>10.934</b> | <b>2.193387</b> | <b>2867</b> | <b>22.672</b> | <b>13.132</b> | <b>3.091873</b> |
| 2.82281         | 5821        | 18.124        | 7.174         | 1.438846        | 4176        | 12.955        | 3.415         | 0.803829        |
| 0.46963         | 4376        | 14.374        | 3.424         | 0.686311        | 3897        | 15.704        | 6.164         | 1.451131        |
| -0.39479        | 4441        | 10.065        | 0.885         | -0.1784         | 4034        | 9.3456        | 0.1944        | -0.04607        |
| 1.783263        | 5451        | 16.896        | 5.946         | 1.192416        | 5821        | 13.64         | 4.1           | 0.965125        |
| -1.22911        | 2950        | 4.8136        | 6.1364        | -1.23223        | 1823        | 5.4306        | 4.1094        | -0.96793        |
| -1.1705         | 4449        | 5.3945        | 5.5555        | -1.11566        | 3509        | 7.8085        | 1.7315        | -0.40801        |
| -0.67538        | 4559        | 6.4268        | 4.5232        | -0.9085         | 3427        | 9.075         | 0.465         | -0.10979        |
| -0.22409        | 4223        | 5.1859        | 5.7641        | -1.15752        | 3332        | 5.4922        | 4.0478        | -0.95342        |
| -0.61459        | 4416        | 5.865         | 5.085         | -1.02124        | 3460        | 8.7572        | 0.7828        | -0.18462        |
| -0.26299        | 3907        | 8.8815        | 2.0685        | -0.4159         | 2711        | 7.2667        | 2.2733        | -0.53558        |
| -1.17634        | 5197        | 9.3708        | 1.5792        | -0.31771        | 3547        | 5.7231        | 3.8169        | -0.89905        |
| -0.6489         | 4307        | 9.4033        | 1.5467        | -0.31119        | 2769        | 3.6114        | 5.9286        | -1.39629        |
| 1.360522        | 4038        | 14.785        | 3.835         | 0.768789        | 2284        | 10.902        | 1.362         | 0.320413        |
| 0.744604        | 3400        | 16.235        | 5.285         | 1.059769        | 2230        | 8.6099        | 0.9301        | -0.2193         |
| 1.093683        | 3502        | 15.277        | 4.327         | 0.867522        | 2490        | 14.699        | 5.159         | 1.214486        |
| 0.801995        | 3117        | 13.699        | 2.749         | 0.550855        | 2457        | 11.437        | 1.897         | 0.446389        |
| 0.418156        | 4689        | 15.803        | 4.853         | 0.973077        | 2308        | 13.518        | 3.978         | 0.936398        |
| 0.294351        | 4295        | 18.929        | 7.979         | 1.60039         | 3078        | 11.339        | 1.799         | 0.423313        |
| 1.858256        | 3902        | 15.505        | 4.555         | 0.913276        | 3315        | 10.528        | 0.988         | 0.232348        |
| -0.33725        | 4120        | 8.8107        | 2.1393        | -0.43011        | 3103        | 7.1866        | 2.3534        | -0.55444        |
| 1.157879        | 4912        | 18.689        | 7.739         | 1.552228        | 4217        | 16.41         | 6.87          | 1.617371        |
| 1.593636        | 5441        | 15.99         | 5.04          | 1.010604        | 4213        | 10.99         | 1.45          | 0.341134        |
| <b>2.622977</b> | <b>6421</b> | <b>23.299</b> | <b>12.349</b> | <b>2.477344</b> | <b>5715</b> | <b>12.686</b> | <b>3.146</b>  | <b>0.740488</b> |
| -0.80288        | 3961        | 10.906        | 0.044         | -0.00963        | 4485        | 9.0078        | 0.5322        | -0.12561        |
| 0.63707         | 3801        | 11.181        | 0.231         | 0.045553        | 5120        | 9.4922        | 0.0478        | -0.01155        |
| -0.0142         | 3406        | 10.217        | 0.733         | -0.1479         | 4703        | 10.1          | 0.56          | 0.131568        |
| -0.44774        | 2183        | 8.5204        | 2.4296        | -0.48836        | 2345        | 7.6333        | 1.9067        | -0.44926        |
| 0.086974        | 3502        | 13.649        | 2.699         | 0.540821        | 3031        | 12.372        | 2.832         | 0.666551        |
| 1.472198        | 4697        | 20.439        | 9.489         | 1.903411        | 4837        | 19.661        | 10.121        | 2.382878        |
| 1.081554        | 4843        | 20.69         | 9.74          | 1.95378         | 4614        | 19.788        | 10.248        | 2.412783        |
| 0.563112        | 4669        | 15.721        | 4.771         | 0.956622        | 3867        | 13.059        | 3.519         | 0.828318        |
| 0.74771         | 5068        | 19.89         | 8.94          | 1.79324         | 4228        | 13.198        | 3.658         | 0.861048        |
| 0.378958        | 4480        | 11.317        | 0.367         | 0.072845        | 4526        | 9.5007        | 0.0393        | -0.00955        |
| 0.691503        | 4192        | 14.456        | 3.506         | 0.702767        | 3248        | 8.9901        | 0.5499        | -0.12978        |
| -0.42925        | 3185        | 9.2936        | 1.6564        | -0.3332         | 2593        | 4.7821        | 4.7579        | -1.12063        |
| 2.008094        | 3431        | 6.6744        | 4.2756        | -0.85881        | 2062        | 9.2144        | 0.3256        | -0.07696        |
| 0.530275        | 3634        | 8.1728        | 2.7772        | -0.55812        | 3192        | 8.396         | 1.144         | -0.26967        |
| 1.346026        | 4328        | 11.114        | 0.164         | 0.032108        | 2921        | 9.6542        | 0.1142        | 0.026596        |

|          |      |        |        |          |      |        |        |          |
|----------|------|--------|--------|----------|------|--------|--------|----------|
| 1.676469 | 4762 | 13.251 | 2.301  | 0.460952 | 3926 | 10.647 | 1.107  | 0.260369 |
| -0.03417 | 4102 | 5.9971 | 4.9529 | -0.99473 | 4015 | 5.1308 | 4.4092 | -1.03852 |
| 1.357712 | 4148 | 10.824 | 0.126  | -0.02609 | 3484 | 9.4145 | 0.1255 | -0.02985 |
| 1.590974 | 5477 | 16.925 | 5.975  | 1.198236 | 4641 | 15.385 | 5.845  | 1.376017 |
| 1.510508 | 4511 | 14.077 | 3.127  | 0.626711 | 5425 | 9.3456 | 0.1944 | -0.04607 |
| 0.835572 | 4227 | 13.769 | 2.819  | 0.564903 | 3035 | 9.4234 | 0.1166 | -0.02775 |
| 1.266744 | 5110 | 12.642 | 1.692  | 0.338741 | 4497 | 9.3173 | 0.2227 | -0.05273 |
| 0.332809 | 5868 | 19.888 | 8.938  | 1.792838 | 5650 | 10.867 | 1.327  | 0.312172 |
| 0.777145 | 4265 | 10.012 | 0.938  | -0.18904 | 4840 | 13.967 | 4.427  | 1.042123 |
| -0.76768 | 3584 | 7.2545 | 3.6955 | -0.7424  | 3927 | 2.9539 | 6.5861 | -1.55111 |
| 0.328667 | 4975 | 15.839 | 4.889  | 0.980302 | 4926 | 13.276 | 3.736  | 0.879414 |
| -0.67745 | 1716 | 6.5268 | 4.4232 | -0.88843 | 1178 | 3.3956 | 6.1444 | -1.4471  |
| -0.04378 | 4455 | 9.4276 | 1.5224 | -0.30631 | 4574 | 7.7394 | 1.8006 | -0.42428 |
| -0.66769 | 4978 | 7.8947 | 3.0553 | -0.61393 | 5861 | 6.6371 | 2.9029 | -0.68383 |
| -0.37644 | 3323 | 8.5766 | 2.3734 | -0.47709 | 5150 | 11.243 | 1.703  | 0.400708 |
| -0.5038  | 3613 | 7.39   | 3.56   | -0.71521 | 3089 | 2.1366 | 7.4034 | -1.74356 |
| -0.11685 | 2851 | 13.855 | 2.905  | 0.582161 | 2864 | 7.4721 | 2.0679 | -0.48722 |
| 1.670552 | 2893 | 11.407 | 0.457  | 0.090906 | 3270 | 9.6942 | 0.1542 | 0.036015 |
| 0.631597 | 3199 | 8.3464 | 2.6036 | -0.52328 | 4007 | 3.419  | 6.121  | -1.44159 |
| 0.360617 | 3642 | 5.2718 | 5.6782 | -1.14028 | 2695 | 3.7848 | 5.7552 | -1.35546 |
| 0.092151 | 3866 | 10.916 | 0.034  | -0.00763 | 2929 | 4.6774 | 4.8626 | -1.14528 |
| -0.12824 | 3861 | 7.2779 | 3.6721 | -0.7377  | 4254 | 4.913  | 4.627  | -1.08981 |
| 1.29751  | 6558 | 12.489 | 1.539  | 0.308037 | 4510 | 10.51  | 0.97   | 0.22811  |
| 1.302687 | 5159 | 10.215 | 0.735  | -0.1483  | 3700 | 7.9459 | 1.5941 | -0.37565 |
| 1.422055 | 5390 | 9.1651 | 1.7849 | -0.35899 | 6013 | 9.4628 | 0.0772 | -0.01847 |
| 1.352978 | 5657 | 15.821 | 4.871  | 0.976689 | 6748 | 10.388 | 0.848  | 0.199383 |
| 1.665375 | 5123 | 10.346 | 0.604  | -0.12201 | 6372 | 12.006 | 2.466  | 0.58037  |
| -0.43265 | 5086 | 11.738 | 0.788  | 0.15733  | 5611 | 11.905 | 2.365  | 0.556588 |
| 0.683663 | 3698 | 12.574 | 1.624  | 0.325095 | 4248 | 15.443 | 5.903  | 1.389674 |
| -0.89844 | 4099 | 13.076 | 2.126  | 0.425834 | 3934 | 4.8551 | 4.6849 | -1.10344 |
| 0.628787 | 5049 | 21.727 | 10.777 | 2.161881 | 4643 | 14.538 | 4.998  | 1.176575 |
| 1.738593 | 4472 | 26.319 | 15.369 | 3.083385 | 5378 | 27.705 | 18.165 | 4.276983 |
| 0.766348 | 4339 | 17.124 | 6.174  | 1.23817  | 4141 | 17.532 | 7.992  | 1.881567 |
| -0.53471 | 3542 | 8.6392 | 2.3108 | -0.46452 | 3103 | 6.671  | 2.869  | -0.67585 |
| 1.644371 | 3813 | 16.391 | 5.441  | 1.091075 | 5518 | 15.295 | 5.755  | 1.354825 |
| 1.432409 | 3505 | 20.2   | 9.25   | 1.855449 | 2829 | 9.1198 | 0.4202 | -0.09924 |
| -0.33577 | 3311 | 3.7451 | 7.2049 | -1.44665 | 3195 | 3.975  | 5.565  | -1.31067 |
| 0.18016  | 2033 | 6.3453 | 4.6047 | -0.92485 | 1556 | 3.7275 | 5.8125 | -1.36895 |
| -0.10561 | 3764 | 9.0861 | 1.8639 | -0.37484 | 3043 | 6.2438 | 3.2962 | -0.77644 |
| 2.518105 | 5031 | 26.198 | 15.248 | 3.059103 | 4613 | 19.684 | 10.144 | 2.388294 |
| 0.345529 | 3846 | 10.348 | 0.602  | -0.12161 | 3694 | 9.3395 | 0.2005 | -0.04751 |
| 0.058131 | 4692 | 13.662 | 2.712  | 0.54343  | 3394 | 5.0972 | 4.4428 | -1.04643 |
| 0.312692 | 3907 | 9.7517 | 1.1983 | -0.24127 | 4169 | 12.329 | 2.789  | 0.656426 |
| 1.63875  | 6078 | 13.047 | 2.097  | 0.420015 | 4393 | 8.2859 | 1.2541 | -0.29559 |
| 0.00281  | 4108 | 6.962  | 3.988  | -0.8011  | 4996 | 4.5036 | 5.0364 | -1.18621 |
| -1.59785 | 3015 | 3.0514 | 7.8986 | -1.58586 | 4529 | 6.4032 | 3.1368 | -0.73891 |
| -0.2732  | 3697 | 10.982 | 0.032  | 0.005619 | 4533 | 5.3827 | 4.1573 | -0.97921 |

|                 |             |               |               |                 |             |               |               |                 |
|-----------------|-------------|---------------|---------------|-----------------|-------------|---------------|---------------|-----------------|
| -0.5353         | 3742        | 11.678        | 0.728         | 0.145289        | 4276        | 19.645        | 10.105        | 2.379111        |
| 0.513413        | 3484        | 15.786        | 4.836         | 0.969666        | 4608        | 24.457        | 14.917        | 3.512183        |
| 1.143975        | 3060        | 12.81         | 1.86          | 0.372454        | 3756        | 16.986        | 7.446         | 1.753001        |
| -0.72256        | 3843        | 8.3789        | 2.5711        | -0.51676        | 4524        | 19.12         | 9.58          | 2.25549         |
| -0.68396        | 4118        | 12.725        | 1.775         | 0.355397        | 4505        | 10.855        | 1.315         | 0.309346        |
| 0.002071        | 4676        | 8.8751        | 2.0749        | -0.41719        | 4341        | 14.974        | 5.434         | 1.279239        |
| 0.741646        | 3086        | 9.5593        | 1.3907        | -0.27988        | 3808        | 15.94         | 6.4           | 1.506701        |
| 1.939461        | 5097        | 12.164        | 1.214         | 0.242818        | 4597        | 15.38         | 5.84          | 1.374839        |
| -0.60009        | 3766        | 11.976        | 1.026         | 0.205091        | 2794        | 14.996        | 5.456         | 1.28442         |
| 0.659257        | 3984        | 5.7731        | 5.1769        | -1.03968        | 3529        | 9.1527        | 0.3873        | -0.09149        |
| <b>2.277743</b> | <b>2202</b> | <b>10.854</b> | <b>0.096</b>  | <b>-0.02007</b> | <b>2121</b> | <b>21.216</b> | <b>11.676</b> | <b>2.749031</b> |
| 1.336708        | 3676        | 9.7661        | 1.1839        | -0.23838        | 3114        | 23.764        | 14.224        | 3.349004        |
| 0.795487        | 3404        | 8.8132        | 2.1368        | -0.42961        | 3256        | 14.22         | 4.68          | 1.101696        |
| 0.507792        | 3946        | 10.821        | 0.129         | -0.02669        | 2832        | 11.017        | 1.477         | 0.347492        |
| 0.581898        | 4739        | 8.3351        | 2.6149        | -0.52555        | 2712        | 11.431        | 1.891         | 0.444976        |
| 0.938964        | 5449        | 10.699        | 0.251         | -0.05117        | 3610        | 14.848        | 5.308         | 1.24957         |
| 2.338388        | 5119        | 13.03         | 2.08          | 0.416603        | 4682        | 17.343        | 7.803         | 1.837063        |
| 1.349872        | 5154        | 9.9922        | 0.9578        | -0.19301        | 4305        | 16.376        | 6.836         | 1.609366        |
| 1.769655        | 3576        | 10.766        | 0.184         | -0.03773        | 3626        | 16.823        | 7.283         | 1.71462         |
| 0.106203        | 3953        | 5.2365        | 5.7135        | -1.14736        | 2349        | 5.8748        | 3.6652        | -0.86333        |
| -0.33606        | 3838        | 10.526        | 0.424         | -0.08589        | 5988        | 16.667        | 7.127         | 1.677887        |
| <b>0.171433</b> | <b>2622</b> | <b>23.684</b> | <b>12.734</b> | <b>2.554604</b> | <b>3200</b> | <b>23.031</b> | <b>13.491</b> | <b>3.176406</b> |
| 0.841784        | 3668        | 14.995        | 4.045         | 0.810931        | 3305        | 22.118        | 12.578        | 2.961423        |
| -0.53279        | 2342        | 8.6678        | 2.2822        | -0.45879        | 3315        | 7.9336        | 1.6064        | -0.37855        |
| -0.31077        | 2998        | 15.177        | 4.227         | 0.847454        | 3545        | 16.107        | 6.567         | 1.546025        |
| -0.9437         | 2995        | 14.758        | 3.808         | 0.763371        | 2014        | 10.377        | 0.837         | 0.196792        |
| -0.5106         | 4691        | 19.527        | 8.577         | 1.720394        | 4431        | 13.36         | 3.82          | 0.899194        |
| 0.517555        | 4852        | 21.063        | 10.113        | 2.028632        | 2898        | 16.322        | 6.782         | 1.59665         |
| -1.45464        | 3934        | 7.4733        | 3.4767        | -0.69849        | 2611        | 9.4983        | 0.0417        | -0.01011        |
| -1.11055        | 3147        | 10.359        | 0.591         | -0.1194         | 2940        | 10.034        | 0.494         | 0.116027        |
| -0.78099        | 2067        | 8.7567        | 2.1933        | -0.44095        | 1726        | 8.1692        | 1.3708        | -0.32307        |
| 1.504887        | 2623        | 12.581        | 1.631         | 0.3265          | 2087        | 13.321        | 3.781         | 0.890011        |
| 0.122178        | 3132        | 13.793        | 2.843         | 0.569719        | 2532        | 12.559        | 3.019         | 0.710584        |
| 0.112711        | 3867        | 7.2666        | 3.6834        | -0.73997        | 2614        | 10.138        | 0.598         | 0.140516        |
| 0.285032        | 4496        | 9.2082        | 1.7418        | -0.35034        | 3147        | 9.6282        | 0.0882        | 0.020474        |
| -0.20605        | 3722        | 11.311        | 0.361         | 0.071641        | 3039        | 9.6413        | 0.1013        | 0.023559        |
| -0.48575        | 2581        | 3.8357        | 7.1143        | -1.42847        | 3601        | 6.0816        | 3.4584        | -0.81464        |
| -1.05611        | 4475        | 8.9832        | 1.9668        | -0.39549        | 3650        | 4.0274        | 5.5126        | -1.29834        |
| -0.46371        | 3727        | 7.2713        | 3.6787        | -0.73903        | 3578        | 7.5182        | 2.0218        | -0.47636        |
| -0.61917        | 3672        | 5.3649        | 5.5851        | -1.1216         | 3742        | 6.5473        | 2.9927        | -0.70498        |
| -0.08801        | 3935        | 16.417        | 5.467         | 1.096292        | 4816        | 2.4709        | 7.0691        | -1.66484        |
| -0.83409        | 2119        | 14.11         | 3.16          | 0.633333        | 3582        | 3.1826        | 6.3574        | -1.49726        |
| 1.341293        | 3961        | 19.212        | 8.262         | 1.657181        | 5647        | 9.2438        | 0.2962        | -0.07004        |
| -0.21921        | 3977        | 17.425        | 6.475         | 1.298574        | 4724        | 4.8264        | 4.7136        | -1.1102         |
| 0.113451        | 2906        | 19.374        | 8.424         | 1.689691        | 4369        | 6.9352        | 2.6048        | -0.61364        |
| -0.2096         | 2743        | 13.416        | 2.466         | 0.494064        | 4840        | 5.7025        | 3.8375        | -0.9039         |
| 0.29864         | 4160        | 20.913        | 9.963         | 1.998531        | 4988        | 7.2374        | 2.3026        | -0.54248        |



|                 |             |               |               |                 |             |               |               |                |
|-----------------|-------------|---------------|---------------|-----------------|-------------|---------------|---------------|----------------|
| 1.465838        | 3615        | 22.075        | 11.125        | 2.231716        | 4804        | 13.301        | 3.761         | 0.885301       |
| 0.728185        | 3361        | 17.941        | 6.991         | 1.402122        | 4234        | 10.723        | 1.183         | 0.278264       |
| 0.961004        | 2800        | 16.679        | 5.729         | 1.148869        | 4082        | 6.9084        | 2.6316        | -0.61995       |
| -0.8477         | 2702        | 12.028        | 1.078         | 0.215526        | 3235        | 3.493         | 6.047         | -1.42417       |
| 1.053451        | 3116        | 11.842        | 0.892         | 0.1782          | 3291        | 5.4695        | 4.0705        | -0.95877       |
| 0.79741         | 2002        | 17.283        | 6.333         | 1.270078        | 3716        | 7.1313        | 2.4087        | -0.56747       |
| -0.12543        | 3118        | 13.855        | 2.905         | 0.582161        | 4934        | 6.6072        | 2.9328        | -0.69088       |
| 0.282518        | 3165        | 20.158        | 9.208         | 1.847021        | 3965        | 8.2472        | 1.2928        | -0.30471       |
| -0.27409        | 2848        | 13.097        | 2.147         | 0.430048        | 4171        | 6.9288        | 2.6112        | -0.61515       |
| -0.351          | 5544        | 17.929        | 6.979         | 1.399714        | 6656        | 12.41         | 2.87          | 0.675499       |
| 0.274086        | 3811        | 23.38         | 12.43         | 2.493598        | 3996        | 5.6056        | 3.9344        | -0.92672       |
| -0.397          | 4490        | 16.481        | 5.531         | 1.109136        | 4717        | 8.0984        | 1.4416        | -0.33975       |
| -0.76857        | 4161        | 14.372        | 3.422         | 0.68591         | 4428        | 8.3559        | 1.1841        | -0.27911       |
| -0.45706        | 3839        | 14.118        | 3.168         | 0.634938        | 4436        | 9.6032        | 0.0632        | 0.014587       |
| -0.90761        | 3177        | 15.392        | 4.442         | 0.8906          | 4186        | 7.8356        | 1.7044        | -0.40163       |
| -0.36091        | 3686        | 19.886        | 8.936         | 1.792437        | 4371        | 10.043        | 0.503         | 0.118146       |
| -0.54448        | 3293        | 14.425        | 3.475         | 0.696546        | 4135        | 11.391        | 1.851         | 0.435557       |
| -0.14747        | 4135        | 19.758        | 8.808         | 1.76675         | 4658        | 11.013        | 1.473         | 0.34655        |
| -0.63426        | 2608        | 18.597        | 7.647         | 1.533766        | 3841        | 8.2531        | 1.2869        | -0.30332       |
| -0.11892        | 3155        | 8.5895        | 2.3605        | -0.4745         | 3438        | 9.5404        | 0.0004        | -0.0002        |
| 0.161819        | 1078        | 24.861        | 13.911        | 2.790799        | 1807        | 11.566        | 2.026         | 0.476764       |
| -0.9116         | 3884        | 12.024        | 1.074         | 0.214723        | 4593        | 10.102        | 0.562         | 0.132039       |
| 1.059663        | 2948        | 20.149        | 9.199         | 1.845215        | 3627        | 17.811        | 8.271         | 1.947262       |
| -0.44404        | 2286        | 10.455        | 0.495         | -0.10014        | 3364        | 8.1748        | 1.3652        | -0.32176       |
| -0.9292         | 2677        | 14.158        | 3.208         | 0.642966        | 4102        | 8.3374        | 1.2026        | -0.28347       |
| -0.39212        | 2175        | 10.805        | 0.145         | -0.0299         | 3761        | 13.932        | 4.392         | 1.033882       |
| 0.457649        | 2687        | 10.495        | 0.455         | -0.09211        | 4742        | 15.183        | 5.643         | 1.328452       |
| -0.02662        | 2782        | 12.797        | 1.847         | 0.369846        | 4847        | 16.959        | 7.419         | 1.746643       |
| -1.10759        | 2347        | 7.0729        | 3.8771        | -0.77884        | 3672        | 4.0577        | 5.4823        | -1.2912        |
| -0.00947        | 3331        | 12.579        | 1.629         | 0.326098        | 4794        | 7.6345        | 1.9055        | -0.44898       |
| 0.663842        | 3110        | 15.016        | 4.066         | 0.815145        | 5508        | 15.142        | 5.602         | 1.318798       |
| -1.57349        | 2691        | 9.4017        | 1.5483        | -0.31151        | 4889        | 8.243         | 1.297         | -0.3057        |
| -1.63774        | 3238        | 3.5516        | 7.3984        | -1.48548        | 4298        | 6.4216        | 3.1184        | -0.73458       |
| 0.279707        | 4204        | 14.772        | 3.822         | 0.76618         | 5825        | 8.9614        | 0.5786        | -0.13654       |
| 0.628639        | 2965        | 9.2074        | 1.7426        | -0.3505         | 3939        | 4.5443        | 4.9957        | -1.17662       |
| 1.964607        | 2687        | 11.202        | 0.252         | 0.049768        | 4653        | 9.0264        | 0.5136        | -0.12123       |
| 2.044333        | 2497        | 15.419        | 4.469         | 0.896018        | 5460        | 10.421        | 0.881         | 0.207153       |
| 0.17025         | 2159        | 10.283        | 0.667         | -0.13465        | 5670        | 8.0071        | 1.5329        | -0.36124       |
| 1.180657        | 1471        | 22.366        | 11.416        | 2.290113        | 3020        | 13.179        | 3.639         | 0.856574       |
| 2.450803        | 1506        | 15.206        | 4.256         | 0.853274        | 5155        | 17.051        | 7.511         | 1.768306       |
| <b>4.521909</b> | <b>2816</b> | <b>35.227</b> | <b>24.277</b> | <b>4.871006</b> | <b>4612</b> | <b>33.348</b> | <b>23.808</b> | <b>5.60573</b> |
| -0.09526        | 1930        | 7.8756        | 3.0744        | -0.61776        | 3810        | 8.2677        | 1.2723        | -0.29988       |
| -1.20811        | 1835        | 6.267         | 4.683         | -0.94057        | 3815        | 4.7182        | 4.8218        | -1.13567       |
| 0.783949        | 2121        | 8.3451        | 2.6049        | -0.52354        | 3520        | 7.2727        | 2.2673        | -0.53417       |
| 0.009319        | 3210        | 10.654        | 0.296         | -0.0602         | 4406        | 8.6927        | 0.8473        | -0.19981       |
| 1.587424        | 2337        | 12.366        | 1.416         | 0.283354        | 4307        | 10.959        | 1.419         | 0.333835       |
| -0.06567        | 2661        | 11.875        | 0.925         | 0.184822        | 3145        | 9.0938        | 0.4462        | -0.10536       |

|          |      |        |        |          |      |        |        |          |
|----------|------|--------|--------|----------|------|--------|--------|----------|
| 0.538706 | 2887 | 20.506 | 9.556  | 1.916856 | 4335 | 19.054 | 9.514  | 2.239949 |
| -0.26536 | 2432 | 8.347  | 2.603  | -0.52316 | 4058 | 8.9946 | 0.5454 | -0.12872 |
| 0.230895 | 3659 | 11.151 | 0.201  | 0.039533 | 5417 | 16.264 | 6.724  | 1.582993 |
| 0.402477 | 3148 | 11.817 | 0.867  | 0.173183 | 4538 | 7.9771 | 1.5629 | -0.36831 |
| -0.69964 | 4298 | 9.3299 | 1.6201 | -0.32592 | 6166 | 9.8605 | 0.3205 | 0.075173 |
| -1.5687  | 4395 | 7.3493 | 3.6007 | -0.72338 | 4226 | 3.3365 | 6.2035 | -1.46102 |
| -0.85229 | 4445 | 11.856 | 0.906  | 0.18101  | 5150 | 13.65  | 4.11   | 0.96748  |
| 1.441432 | 3299 | 21.128 | 10.178 | 2.041676 | 4571 | 29.381 | 19.841 | 4.671628 |
| 1.276506 | 3256 | 13.698 | 2.748  | 0.550655 | 5966 | 21.187 | 11.647 | 2.742202 |
| 1.899524 | 5053 | 25.727 | 14.777 | 2.964585 | 5637 | 30.247 | 20.707 | 4.875543 |
| 0.405287 | 3174 | 3.7177 | 7.2323 | -1.45215 | 5015 | 13.918 | 4.378  | 1.030585 |
| 1.797907 | 3234 | 9.9876 | 0.9624 | -0.19393 | 4768 | 17.722 | 8.182  | 1.926306 |
| 1.303131 | 2579 | 25.359 | 14.409 | 2.890736 | 5167 | 22.257 | 12.717 | 2.994153 |
| 0.976683 | 3282 | 12.249 | 1.299  | 0.259875 | 6902 | 17.676 | 8.136  | 1.915474 |
| 1.564645 | 2571 | 9.9961 | 0.9539 | -0.19223 | 4522 | 20.168 | 10.628 | 2.50226  |
| 1.699691 | 3122 | 12.332 | 1.382  | 0.276531 | 3768 | 13.907 | 4.367  | 1.027995 |
| 0.397152 | 1621 | 7.7113 | 3.2387 | -0.65073 | 3509 | 10.972 | 1.432  | 0.336896 |
| 1.277394 | 1996 | 10.02  | 0.93   | -0.18743 | 3165 | 13.207 | 3.667  | 0.863167 |
| 0.055172 | 2443 | 6.9996 | 3.9504 | -0.79355 | 4294 | 11.504 | 1.964  | 0.462165 |
| 0.052214 | 2417 | 9.4332 | 1.5168 | -0.30519 | 5346 | 13.468 | 3.928  | 0.924624 |
| 0.852138 | 2416 | 8.6507 | 2.2993 | -0.46222 | 4447 | 9.9843 | 0.4443 | 0.104324 |
| -0.05576 | 3633 | 8.5604 | 2.3896 | -0.48034 | 4990 | 9.8998 | 0.3598 | 0.084427 |
| 0.49374  | 3433 | 5.2432 | 5.7068 | -1.14602 | 4600 | 9.8043 | 0.2643 | 0.06194  |
| 0.706738 | 3289 | 8.1788 | 2.7712 | -0.55692 | 5539 | 13.992 | 4.452  | 1.04801  |
| 0.405879 | 3178 | 7.5205 | 3.4295 | -0.68902 | 4257 | 11.534 | 1.994  | 0.469229 |
| 0.316982 | 3191 | 7.1451 | 3.8049 | -0.76435 | 2907 | 5.9856 | 3.5544 | -0.83724 |
| -0.75022 | 4768 | 20.826 | 9.876  | 1.981072 | 5377 | 5.1888 | 4.3512 | -1.02486 |
| -0.83306 | 5448 | 22.394 | 11.444 | 2.295732 | 4634 | 5.8049 | 3.7351 | -0.87979 |
| -0.37556 | 4791 | 15.55  | 4.6    | 0.922306 | 5484 | 8.4792 | 1.0608 | -0.25008 |
| -0.18312 | 4613 | 10.926 | 0.024  | -0.00562 | 4583 | 6.3496 | 3.1904 | -0.75153 |
| 0.103836 | 4123 | 13.752 | 2.802  | 0.561491 | 6245 | 8.695  | 0.845  | -0.19926 |
| 0.215808 | 3259 | 17.674 | 6.724  | 1.348542 | 3690 | 5.4743 | 4.0657 | -0.95764 |
| -0.14777 | 2530 | 11.858 | 0.908  | 0.181411 | 6465 | 12.049 | 2.509  | 0.590495 |
| -0.89208 | 3261 | 8.893  | 2.057  | -0.41359 | 5624 | 11.807 | 2.267  | 0.533512 |
| 0.332957 | 2573 | 11.97  | 1.02   | 0.203887 | 4175 | 8.6467 | 0.8933 | -0.21064 |
| -0.4856  | 2704 | 5.6583 | 5.2917 | -1.06272 | 4404 | 10.876 | 1.336  | 0.314291 |
| 0.718719 | 3268 | 15.116 | 4.166  | 0.835213 | 3623 | 9.6881 | 0.1481 | 0.034578 |
| 0.718423 | 3195 | 12.05  | 1.1    | 0.219941 | 4043 | 10.908 | 1.368  | 0.321826 |
| -1.56732 | 3074 | 3.4157 | 7.5343 | -1.51275 | 4511 | 6.0297 | 3.5103 | -0.82686 |
| -1.36305 | 2141 | 3.6899 | 7.2601 | -1.45773 | 3696 | 6.71   | 2.83   | -0.66667 |
| -1.28179 | 3216 | 13.277 | 2.327  | 0.46617  | 5275 | 10.427 | 0.887  | 0.208566 |
| -0.50898 | 3070 | 17.036 | 6.086  | 1.220511 | 4653 | 14.206 | 4.666  | 1.0984   |
| 0.273791 | 3390 | 10.472 | 0.478  | -0.09673 | 5480 | 10.201 | 0.661  | 0.15535  |
| -0.09777 | 3927 | 14.948 | 3.998  | 0.801499 | 3791 | 9.9446 | 0.4046 | 0.094976 |
| -1.10966 | 4463 | 14.788 | 3.838  | 0.769391 | 4038 | 13.323 | 3.783  | 0.890481 |
| -0.85495 | 3728 | 9.5225 | 1.4275 | -0.28727 | 3793 | 10.308 | 0.768  | 0.180545 |
| 0.123509 | 5638 | 14.331 | 3.381  | 0.677682 | 4677 | 3.9769 | 5.5631 | -1.31023 |

|          |      |        |         |          |        |         |         |          |
|----------|------|--------|---------|----------|--------|---------|---------|----------|
| 0.54344  | 3952 | 10.071 | 0.879   | -0.1772  | 5029   | 6.6614  | 2.8786  | -0.67811 |
| 0.242137 | 5305 | 15.231 | 4.281   | 0.858291 | 4776   | 4.7948  | 4.7452  | -1.11764 |
| -0.40484 | 2766 | 6.3991 | 4.5509  | -0.91406 | 5758   | 8.6315  | 0.9085  | -0.21422 |
| -0.25708 | 4170 | 5.012  | 5.938   | -1.19242 | 5519   | 4.7472  | 4.7928  | -1.12885 |
| -0.67701 | 3752 | 6.7964 | 4.1536  | -0.83433 | 6253   | 6.4929  | 3.0471  | -0.71779 |
| -0.59625 | 4362 | 11.967 | 1.017   | 0.203285 | 6624   | 12.077  | 2.537   | 0.597088 |
| 1.51317  | 3117 | 16.683 | 5.733   | 1.149672 | 6273   | 14.204  | 4.664   | 1.097929 |
| 0.116853 | 3686 | 10.635 | 0.315   | -0.06402 | 5088   | 11.95   | 2.41    | 0.567184 |
| -1.29631 | 2304 | 6.033  | 4.917   | -0.98753 | 4757   | 6.769   | 2.771   | -0.65278 |
| -0.77034 | 3017 | 7.4909 | 3.4591  | -0.69496 | 4143   | 7.217   | 2.323   | -0.54729 |
| 0.418895 | 2504 | 10.383 | 0.567   | -0.11459 | 4325   | 11.052  | 1.512   | 0.355733 |
| -1.11202 | 3078 | 6.5302 | 4.4198  | -0.88775 | 6377   | 13.141  | 3.601   | 0.847626 |
| -0.37556 | 2570 | 5.4475 | 5.5025  | -1.10502 | 4570   | 14.551  | 5.011   | 1.179636 |
| -0.71443 | 4893 | 8.0114 | 2.9386  | -0.59051 | 4973   | 11.1    | 1.56    | 0.367036 |
| -1.05049 | 5407 | 6.3436 | 4.6064  | -0.9252  | 5597   | 10.398  | 0.858   | 0.201737 |
| -0.7057  | 6132 | 9.0346 | 1.9154  | -0.38518 | 6255   | 14.181  | 4.641   | 1.092513 |
| -1.07771 | 5392 | 5.8791 | 5.0709  | -1.01841 | 4199   | 9.669   | 0.129   | 0.030081 |
| -0.56341 | 5208 | 8.0453 | 2.9047  | -0.58371 | 4140   | 14.227  | 4.687   | 1.103345 |
| -1.77894 | 3934 | 2.9995 | 7.9505  | -1.59628 | 2767   | 11.312  | 1.772   | 0.416955 |
| -0.83409 | 3864 | 13.251 | 2.301   | 0.460952 | 3994   | 3.3801  | 6.1599  | -1.45075 |
| -0.47407 | 4083 | 15.111 | 4.161   | 0.83421  | 2937   | 5.1413  | 4.3987  | -1.03605 |
| 0.32704  | 4694 | 20.111 | 9.161   | 1.837589 | 3146   | 7.2155  | 2.3245  | -0.54764 |
| 0.984078 | 4443 | 13.077 | 2.127   | 0.426035 | 5456   | 7.368   | 2.172   | -0.51173 |
| -0.76206 | 1532 | 9.0078 | 1.9422  | -0.39056 | 2505   | 1.8363  | 7.7037  | -1.81427 |
| -0.29332 | 3706 | 14.49  | 3.54    | 0.70959  | 3651   | 4.6836  | 4.8564  | -1.14382 |
| -0.04689 | 3124 | 14.853 | 3.903   | 0.782435 | 3486   | 4.0161  | 5.5239  | -1.301   |
| -1.3319  | 2430 | 8.1481 | 2.8019  | -0.56308 | 2176   | 2.9871  | 6.5529  | -1.54329 |
| -0.16285 | 3274 | 16.768 | 5.818   | 1.16673  | 3504   | 5.6507  | 3.8893  | -0.9161  |
| -0.90894 | 2808 | 9.188  | 1.762   | -0.35439 | 3052   | 2.9161  | 6.6239  | -1.56001 |
| -0.04896 | 2517 | 11.561 | 0.611   | 0.12181  | 3587   | 4.1539  | 5.3861  | -1.26855 |
| -0.25515 | 1810 | 5.0276 | 5.9224  | -1.18929 | 3993   | 4.007   | 5.533   | -1.30314 |
| 0.02766  | 3483 | 17.858 | 6.908   | 1.385466 | 4115   | 6.4885  | 3.0515  | -0.71883 |
| -0.36343 | 2844 | 7.1027 | 3.8473  | -0.77286 | 2943   | 4.2474  | 5.2926  | -1.24653 |
| 0.772708 | 3845 | 13.914 | 2.964   | 0.594001 | 3529   | 5.0723  | 4.4677  | -1.0523  |
| -0.86382 | 1849 | 2.8123 | 8.1377  | -1.63384 | 3290   | 2.7356  | 6.8044  | -1.60251 |
| -0.68573 | 3338 | 10.725 | 0.225   | -0.04595 | 3667   | 8.8901  | 0.6499  | -0.15333 |
| 1.145602 | 4800 | 19.917 | 8.967   | 1.798658 | 3373   | 6.2556  | 3.2844  | -0.77367 |
| 0.290653 | 3517 | 9.6389 | 1.3111  | -0.26391 | 3093   | 6.9835  | 2.5565  | -0.60227 |
| -0.41032 | 4115 | 9.6719 | 1.2781  | -0.25729 | 3678   | 4.6493  | 4.8907  | -1.1519  |
|          | 3672 | 10.954 | 3.367   |          | 3993.5 | 9.54125 | 2.8695  |          |
|          |      |        | 10.101  |          |        |         | 8.6085  |          |
|          |      |        | 4.98316 |          |        |         | 4.24686 |          |

|      |        |      |        |
|------|--------|------|--------|
| 2083 | 12.578 | 2144 | 8.9086 |
| 1908 | 10.063 | 2166 | 10.434 |
| 1501 | 4.4637 | 1007 | 6.0576 |

|          |          |          |          |
|----------|----------|----------|----------|
| 1986     | 2.2155   | 1695     | 2.0649   |
| 1869.5   | 7.33005  | 1753     | 6.866275 |
| 255.8834 | 4.809178 | 542.6263 | 3.679081 |
| 3992     | 55.411   | 4086     | 27.288   |
| 3084     | 44.812   | 2676     | 31.39    |
| 5291     | 38.216   | 3690     | 38.618   |
| 4583     | 59.503   | 6419     | 35.784   |
| 4237.5   | 49.4855  | 4217.75  | 33.27    |
|          | 9.734904 |          | 4.974603 |
|          | 29.20471 |          | 14.92381 |
|          | 14.42753 |          | 11.03724 |
|          | 43.63225 |          | 25.96105 |
|          | 42.15545 |          | 26.40373 |
|          | 1.035032 |          | 0.983234 |
|          | -0.03503 |          | 0.016766 |

|     |        |      |        |
|-----|--------|------|--------|
| 906 | 27.373 | 1180 | 19.915 |
| 620 | 19.032 | 818  | 17.359 |

|      |        |      |        |
|------|--------|------|--------|
| 3694 | 48.674 | 5750 | 8.2435 |
| 3613 | 33.49  | 3998 | 19.535 |

|      |        |      |        |
|------|--------|------|--------|
| 5693 | 41.015 | 5766 | 19.337 |
| 4074 | 37.923 | 6441 | 18.864 |



y

y

y

y

y

y

y



y

y

y

y

|                  |                               |               |                  | cell ct     | % inf         | AD            |
|------------------|-------------------------------|---------------|------------------|-------------|---------------|---------------|
| 50072 A02        | M-015991- coiled-coil         | 133957        | CCDC127          | 4749        | 5.3274        | 6.2826        |
| 50072 A04        | M-019235- EGF-like, fil       | 133584        | EGFLAM           | 4794        | 13.767        | 2.157         |
| 50072 A05        | M-032029- VNFT9373            | 127614        | UNQ9373          | 3651        | 14.024        | 2.414         |
| 50072 A06        | M-018452- hypothetical        | 133558        | FLJ40243         | 3905        | 10.986        | 0.624         |
| 50072 A07        | M-016623- transmemk           | 127670        | TEDDM1           | 2771        | 11.729        | 0.119         |
| <b>50072 A08</b> | <b>M-028413- hypothetical</b> | <b>133491</b> | <b>LOC133491</b> | <b>4692</b> | <b>26.79</b>  | <b>15.18</b>  |
| 50072 A09        | M-027210- chromoson           | 127687        | C1orf122         | 4164        | 9.1979        | 2.4121        |
| 50072 A10        | M-007375- solute carri        | 133482        | SLCO6A1          | 3025        | 15.835        | 4.225         |
| 50072 A11        | M-016554- chromoson           | 127700        | C1orf102         | 1826        | 13.089        | 1.479         |
| 50072 A12        | M-027213- embigin ho          | 133418        | EMB              | 2440        | 10.615        | 0.995         |
| 50072 A13        | M-016893- hypothetical        | 127703        | FLJ38984         | 2174        | 14.397        | 2.787         |
| 50072 A14        | M-016729- chromoson           | 133383        | C5orf35          | 3687        | 20.966        | 9.356         |
| 50072 A15        | M-016598- kelch doma          | 127707        | KLHDC7A          | 2947        | 14.489        | 2.879         |
| 50072 A16        | M-007345- Na+/H+ exc          | 133308        | NHEDC2           | 1307        | 10.635        | 0.975         |
| 50072 A17        | M-015953- hypothetical        | 127731        | FLJ32784         | 3017        | 8.1869        | 3.4231        |
| 50072 A18        | M-008704- ectonucleo          | 133121        | ENPP6            | 2769        | 13.218        | 1.608         |
| 50072 A19        | M-008657- UBX domai           | 127733        | UBXD3            | 1777        | 11.818        | 0.208         |
| <b>50072 A20</b> | <b>M-017748- otopetrin 1</b>  | <b>133060</b> | <b>OTOP1</b>     | <b>2574</b> | <b>28.322</b> | <b>16.712</b> |
| 50072 A21        | M-016507- chromoson           | 127795        | C1orf87          | 3572        | 14.726        | 3.116         |
| 50072 A23        | M-016577- ADP-ribosy          | 127829        | ARL8A            | 3576        | 17.31         | 5.7           |
| 50072 B02        | M-003819- CCCTC-binc          | 140690        | CTCFL            | 4665        | 5.6806        | 5.9294        |
| 50072 B04        | M-013335- cerebellin 4        | 140689        | CBLN4            | 3757        | 8.8635        | 2.7465        |
| 50072 B05        | M-007272- chromoson           | 387357        | C6orf190         | 3785        | 5.6803        | 5.9297        |
| 50072 B06        | M-015240- chromoson           | 140688        | C20orf112        | 3142        | 5.9835        | 5.6265        |
| 50072 B07        | M-032019- Notch hom           | 388677        | NOTCH2NL         | 1678        | 3.8737        | 7.7363        |
| 50072 B08        | M-013334- WAP four-c          | 140686        | WFDC3            | 2913        | 4.8404        | 6.7696        |
| 50072 B09        | M-028389- hypothetical        | 134121        | LOC134121        | 3520        | 6.9886        | 4.6214        |
| 50072 B10        | M-024291- chromoson           | 140683        | C20orf70         | 2692        | 5.3492        | 6.2608        |
| 50072 B11        | M-024274- hypothetical        | 134145        | LOC134145        | 2768        | 2.8902        | 8.7198        |
| 50072 B12        | M-015769- chromoson           | 140680        | C20orf96         | 2297        | 6.5303        | 5.0797        |
| 50072 B13        | M-016730- hypothetical        | 134187        | FLJ25680         | 2752        | 2.4346        | 9.1754        |
| 50072 B14        | M-007639- solute carri        | 140679        | SLC32A1          | 2571        | 5.2898        | 6.3202        |
| 50072 B15        | M-019326- DnaJ homo           | 134218        | DNAJA5           | 3997        | 10.458        | 1.152         |
| 50072 B16        | M-019043- actin-relate        | 140625        | ACTRT2           | 3162        | 3.0361        | 8.5739        |
| 50072 B17        | M-024339- actin filame        | 134265        | AFAP1L1          | 2991        | 6.8873        | 4.7227        |
| 50072 B18        | M-014089- zinc finger         | 140612        | ZFP28            | 3355        | 2.623         | 8.987         |
| 50072 B19        | M-016191- GrpE-like 2         | 134266        | GRPEL2           | 5466        | 13.026        | 1.416         |
| 50072 B20        | M-015230- selenoprot          | 140606        | SELM             | 5337        | 10.418        | 1.192         |
| 50072 B21        | M-018796- transmemk           | 134285        | TMEM171          | 2838        | 6.413         | 5.197         |
| 50072 B23        | M-016731- transmemk           | 134288        | TMEM174          | 3044        | 4.1064        | 7.5036        |
| 50072 C02        | M-016877- translocati         | 133022        | TRAM1L1          | 3127        | 6.5878        | 5.0222        |
| 50072 C04        | M-016333- chromoson           | 133015        | C4orf28          | 5588        | 10.039        | 1.571         |
| 50072 C05        | M-018809- synaptotag          | 127833        | SYT2             | 4417        | 10.799        | 0.811         |
| 50072 C06        | M-016011- chromoson           | 132989        | C4orf36          | 3980        | 10.704        | 0.906         |
| 50072 C07        | M-027211- golgi transp        | 127845        | GOLT1A           | 3501        | 10.111        | 1.499         |
| 50072 C08        | M-016532- phosducin-          | 132954        | PDCL2            | 3075        | 10.829        | 0.781         |

|                  |                            |                        |             |               |               |
|------------------|----------------------------|------------------------|-------------|---------------|---------------|
| 50072 C09        | M-016275- Fc receptor      | 127943 FCRLB           | 3960        | 12.247        | 0.637         |
| 50072 C10        | M-018650- 2-aminoadi       | 132949 AASDH           | 2865        | 20.489        | 8.879         |
| 50072 C11        | M-015961- WD repeat        | 128025 WDR64           | 2489        | 10.566        | 1.044         |
| 50072 C12        | M-019170- cytoplasmic      | 132864 CPEB2           | 2489        | 7.3925        | 4.2175        |
| 50072 C13        | M-016069- chromosom        | 128061 C1orf131        | 2510        | 9.9203        | 1.6897        |
| 50072 C14        | M-018741- spermatog        | 132851 SPATA4          | 1955        | 13.708        | 2.098         |
| 50072 C15        | M-016668- Lix1 homol       | 128077 LIX1L           | 2789        | 13.302        | 1.692         |
| 50072 C16        | M-008672- glucosamin       | 132789 GNPDA2          | 2638        | 5.7998        | 5.8102        |
| 50072 C17        | M-027618- 3-beta-hyd       | 128102 LOC128102       | 3169        | 12.307        | 0.697         |
| <b>50072 C18</b> | <b>M-009116- transmemk</b> | <b>132724 TMPRSS11</b> | <b>3291</b> | <b>23.519</b> | <b>11.909</b> |
| 50072 C19        | M-016538- spermatog        | 128153 SPATA17         | 3917        | 14.399        | 2.789         |
| 50072 C20        | M-015464- chromosom        | 132720 C4orf32         | 3258        | 11.51         | 0.1           |
| 50072 C21        | M-018431- Kruppel-lik      | 128209 KLF17           | 3978        | 20.387        | 8.777         |
| 50072 C23        | M-016058- transmemk        | 128218 TMEM125         | 3255        | 5.2535        | 6.3565        |
| 50072 D02        | M-015344- transcriptic     | 140597 TCEAL2          | 3233        | 2.7529        | 8.8571        |
| 50072 D04        | M-015229- defensin, b      | 140596 DEFB104A        | 5367        | 7.9188        | 3.6912        |
| 50072 D05        | M-018455- LSM11, U7        | 134353 LSM11           | 3754        | 8.6574        | 2.9526        |
| 50072 D06        | M-017198- chondrolec       | 140578 CHODL           | 2919        | 1.5074        | 10.1026       |
| 50072 D07        | M-016919- chromosom        | 134359 C5orf37         | 4287        | 2.7525        | 8.8575        |
| 50072 D08        | M-015228- S100 calciu      | 140576 S100A16         | 4245        | 4.2167        | 7.3933        |
| 50072 D09        | M-005705- G protein-c      | 134391 GPR151          | 3237        | 10.998        | 0.612         |
| 50072 D10        | M-021149- zinc finger      | 140467 ZNF358          | 3735        | 6.3989        | 5.2111        |
| 50072 D11        | M-003315- START dom        | 134429 STARD4          | 2655        | 8.3616        | 3.2484        |
| 50072 D12        | M-013090- myosin, ligl     | 140465 MYL6B           | 2413        | 7.1695        | 4.4405        |
| 50072 D13        | M-017004- WD repeat        | 134430 WDR36           | 2144        | 6.2034        | 5.4066        |
| 50072 D14        | M-014295- ankyrin rep      | 140462 ASB9            | 2557        | 8.3692        | 3.2408        |
| 50072 D15        | M-028442- hypothetic       | 134466 LOC134466       | 2180        | 2.7064        | 8.9036        |
| 50072 D16        | M-014301- ankyrin rep      | 140461 ASB8            | 3341        | 5.1482        | 6.4618        |
| 50072 D17        | M-016043- NudC dom         | 134492 NUDCD2          | 3444        | 13.415        | 1.805         |
| 50072 D18        | M-012930- ankyrin rep      | 140460 ASB7            | 3894        | 14.099        | 2.489         |
| 50072 D19        | M-016328- ubiquitin-li     | 134510 UBLCP1          | 4406        | 10.35         | 1.26          |
| 50072 D20        | M-013355- ankyrin rep      | 140459 ASB6            | 4121        | 8.3475        | 3.2625        |
| 50072 D21        | M-017945- ankyrin rep      | 134548 ANKRD43         | 5671        | 9.2929        | 2.3171        |
| 50072 D23        | M-015348- shroom far       | 134549 SHROOM1         | 3923        | 8.4629        | 3.1471        |
| 50072 E02        | M-016038- spermatog        | 132671 SPATA18         | 4939        | 12.432        | 0.822         |
| 50072 E04        | M-019325- lin-54 hom       | 132660 LIN54           | 2650        | 14.151        | 2.541         |
| 50072 E05        | M-016052- chromosom        | 128229 C1orf182        | 3280        | 10.213        | 1.397         |
| 50072 E06        | M-017752- zinc finger      | 132625 ZFP42           | 5364        | 13.386        | 1.776         |
| 50072 E07        | M-009077- IQ motif co      | 128239 IQGAP3          | 3501        | 16.595        | 4.985         |
| 50072 E08        | M-008699- adenosine        | 132612 ADAD1           | 4093        | 8.8688        | 2.7412        |
| 50072 E09        | M-016460- apolipopro       | 128240 APOA1BP         | 2158        | 17.98         | 6.37          |
| 50072 E10        | M-015609- transmemk        | 132332 TMEM155         | 3092        | 15.718        | 4.108         |
| 50072 E11        | M-008370- Rho guanin       | 128272 ARHGEF19        | 3246        | 15.804        | 4.194         |
| 50072 E12        | M-018450- chromosom        | 132321 C4orf33         | 1848        | 11.039        | 0.571         |
| 50072 E13        | M-019054- mitochond        | 128308 MRPL55          | 2476        | 13.045        | 1.435         |
| 50072 E14        | M-016016- sodium cha       | 132320 SCLT1           | 3477        | 20.851        | 9.241         |
| 50072 E15        | M-017836- transmemk        | 128338 TMEM77          | 2589        | 9.1927        | 2.4173        |

|                  |                              |                      |             |               |               |
|------------------|------------------------------|----------------------|-------------|---------------|---------------|
| 50072 E16        | M-015633- OCIA doma          | 132299 OCIAD2        | 3377        | 13.118        | 1.508         |
| 50072 E17        | M-018821- chromoson          | 128344 C1orf88       | 3616        | 14.546        | 2.936         |
| 50072 E18        | M-017501- H1 histone         | 132243 H1FOO         | 2816        | 21.982        | 10.372        |
| 50072 E19        | M-017770- chromoson          | 128346 C1orf162      | 3352        | 4.3854        | 7.2246        |
| 50072 E20        | M-028163- ribosomal j        | 132241 RPL32P3       | 3280        | 9.2378        | 2.3722        |
| 50072 E21        | M-027376- TatD DNase         | 128387 TATDN3        | 4008        | 17.29         | 5.68          |
| 50072 E23        | M-015430- chromoson          | 128414 C20orf58      | 4260        | 12.183        | 0.573         |
| 50072 F02        | M-017458- ankyrin rep        | 140458 ASB5          | 3187        | 8.5033        | 3.1067        |
| 50072 F04        | M-013267- ankyrin rep        | 140456 ASB11         | 3387        | 6.7316        | 4.8784        |
| 50072 F05        | M-015517- chromoson          | 134553 C5orf24       | 5149        | 9.1862        | 2.4238        |
| 50072 F06        | M-025429- mucin 17, c        | 140453 MUC17         | 5043        | 16.042        | 4.432         |
| 50072 F07        | M-018920- deaminase          | 134637 DEADC1        | 3461        | 16.816        | 5.206         |
| 50072 F08        | M-007135- ring finger j      | 140432 RNF113B       | 3284        | 3.5932        | 8.0168        |
| 50072 F09        | M-028645- chromoson          | 134701 C6orf159      | 3390        | 5.3982        | 6.2118        |
| 50072 F10        | M-015903- t-complex :        | 140290 TCP10L        | 3408        | 12.5          | 0.89          |
| 50072 F11        | M-024865- interleukin-       | 134728 IRAK1BP1      | 3161        | 7.2762        | 4.3338        |
| 50072 F12        | M-018675- keratin assi       | 140258 KRTAP13-1     | 3117        | 11.036        | 0.574         |
| 50072 F13        | M-024722- chromoson          | 134829 C6orf213      | 3514        | 10.131        | 1.479         |
| 50072 F14        | M-016659- ribosomal j        | 140032 RPS4Y2        | 3947        | 18.216        | 6.606         |
| 50072 F15        | M-017286- syntaxin bli       | 134957 STXBP5        | 4156        | 9.4562        | 2.1538        |
| 50072 F16        | M-024825- hypothetic:        | 139886 RP11-93B1     | 3444        | 16.696        | 5.086         |
| 50072 F17        | M-015800- histidine tr       | 135114 HINT3         | 4086        | 8.2477        | 3.3623        |
| <b>50072 F18</b> | <b>M-015696- dedicator c</b> | <b>139818 DOCK11</b> | <b>3304</b> | <b>33.596</b> | <b>21.986</b> |
| 50072 F19        | M-016948- PARK2 co-r         | 135138 PACRG         | 3551        | 6.6742        | 4.9358        |
| 50072 F20        | M-017003- chromoson          | 139804 CXorf55       | 4783        | 8.5511        | 3.0589        |
| 50072 F21        | M-015266- beta-1,3-gl        | 135152 B3GAT2        | 6133        | 15.066        | 3.456         |
| 50072 F23        | M-015985- chromoson          | 135154 C6orf57       | 5165        | 12.004        | 0.394         |
| 50072 G02        | M-016728- chromoson          | 132228 C3orf45       | 5280        | 11.78         | 0.17          |
| 50072 G04        | M-018739- synaptopor         | 132204 SYNPR         | 4075        | 12.54         | 0.93          |
| 50072 G05        | M-015237- chromoson          | 128434 C20orf102     | 4133        | 19.526        | 7.916         |
| 50072 G06        | M-016590- chromoson          | 132200 C3orf49       | 4372        | 7.731         | 3.879         |
| 50072 G07        | M-024166- chromoson          | 128486 C20orf142     | 3415        | 8.3163        | 3.2937        |
| 50072 G08        | M-016028- protein phc        | 132160 PPM1M         | 3830        | 3.577         | 8.033         |
| 50072 G09        | M-010915- WAP four-c         | 128488 WFDC12        | 3022        | 6.2872        | 5.3228        |
| 50072 G10        | M-006728- glycerate k        | 132158 GLYCTK        | 3339        | 12.489        | 0.879         |
| 50072 G11        | M-015238- chromoson          | 128497 C20orf165     | 1939        | 4.1774        | 7.4326        |
| 50072 G12        | M-016325- IQ motif co        | 132141 IQCF1         | 2778        | 5.5076        | 6.1024        |
| 50072 G13        | M-018447- teashirt far       | 128553 TSHZ2         | 2868        | 5.5439        | 6.0661        |
| 50072 G14        | M-016727- receptor (c        | 132112 RTP1          | 2963        | 4.8262        | 6.7838        |
| 50072 G15        | M-017835- chromoson          | 128602 C20orf85      | 3630        | 3.0028        | 8.6072        |
| 50072 G16        | M-007947- interleukin        | 132014 IL17RE        | 3807        | 12.398        | 0.788         |
| 50072 G17        | M-024186- chromoson          | 128611 C20orf174     | 3706        | 16.217        | 4.607         |
| 50072 G18        | M-016534- chromoson          | 132001 C3orf31       | 4768        | 14.66         | 3.05          |
| 50072 G19        | M-015981- TBC1 doma          | 128637 TBC1D20       | 5938        | 5.9784        | 5.6316        |
| 50072 G20        | M-016329- methyltran         | 131965 METTL6        | 5290        | 13.554        | 1.944         |
| 50072 G21        | M-015265- chromoson          | 128653 C20orf141     | 4556        | 16.045        | 4.435         |
| 50072 G23        | M-017306- cystatin-lik       | 128817 CSTL1         | 5994        | 15.682        | 4.072         |

|           |                        |                  |      |        |        |
|-----------|------------------------|------------------|------|--------|--------|
| 50072 H02 | M-027176- pregnancy    | 139728 PNCK      | 3416 | 16.511 | 4.901  |
| 50072 H04 | M-027215- forkhead b   | 139628 FOXR2     | 3445 | 18.491 | 6.881  |
| 50072 H05 | M-015378- CD109 mol    | 135228 CD109     | 4349 | 10.117 | 1.493  |
| 50072 H06 | M-015813- melanoma     | 139599 MAGEE2    | 3695 | 17.997 | 6.387  |
| 50072 H07 | M-016880- retinoic aci | 135250 RAET1E    | 3758 | 19.053 | 7.443  |
| 50072 H08 | M-016141- uracil phos  | 139596 UPRT      | 3824 | 19.456 | 7.846  |
| 50072 H09 | M-016381- serine-argi  | 135295 SRrp35    | 3630 | 15.234 | 3.624  |
| 50072 H10 | M-032033- OTU domai    | 139562 OTUD6A    | 3917 | 23.411 | 11.801 |
| 50072 H11 | M-016793- chromoson    | 135398 C6orf141  | 3904 | 23.028 | 11.418 |
| 50072 H12 | M-018932- melanoma     | 139422 MAGEB10   | 2807 | 23.299 | 11.689 |
| 50072 H13 | M-028635- FK506 bind   | 135521 FKBP1C    | 3523 | 6.7556 | 4.8544 |
| 50072 H14 | M-032032- SMEK hom     | 139420 SMEK3P    | 3726 | 15.003 | 3.393  |
| 50072 H15 | M-007129- tripartite r | 135644 TRIM40    | 3671 | 17.107 | 5.497  |
| 50072 H16 | M-007911- patched dc   | 139411 PTCHD1    | 4049 | 14.226 | 2.616  |
| 50072 H17 | M-015285- diffuse pan  | 135656 DPCR1     | 3599 | 17.088 | 5.478  |
| 50072 H18 | M-018480- FUN14 don    | 139341 FUNDC1    | 3532 | 5.1529 | 6.4571 |
| 50072 H19 | M-018926- Williams-Bi  | 135886 WBSCR28   | 3722 | 10.613 | 0.997  |
| 50072 H20 | M-015913- chromoson    | 139324 CXorf43   | 3159 | 15.163 | 3.553  |
| 50072 H21 | M-007130- tripartite r | 135892 TRIM50    | 3504 | 12.414 | 0.804  |
| 50072 H23 | M-018513- chromoson    | 135927 C7orf34   | 3263 | 6.7729 | 4.8371 |
| 50072 I02 | M-032030- SRSR846      | 131920 UNQ846    | 4445 | 9.3813 | 2.2287 |
| 50072 I04 | M-023732- hypothetic   | 131873 LOC131873 | 3073 | 11.878 | 0.268  |
| 50072 I05 | M-013333- cystatin 9-l | 128821 CST9L     | 4847 | 20.961 | 9.351  |
| 50072 I06 | M-016334- nudix (nucl  | 131870 NUDT16    | 4435 | 14.408 | 2.798  |
| 50072 I07 | M-017728- chromoson    | 128826 C20orf166 | 4269 | 10.611 | 0.999  |
| 50072 I08 | M-018760- chromoson    | 131831 C3orf44   | 4549 | 21.895 | 10.285 |
| 50072 I09 | M-017908- TSPY-like 3  | 128854 TSPYL3    | 3649 | 10.989 | 0.621  |
| 50072 I10 | M-016023- urocanase    | 131669 UROC1     | 3021 | 18.239 | 6.629  |
| 50072 I11 | M-008771- bactericida  | 128859 BPIL3     | 2437 | 9.7251 | 1.8849 |
| 50072 I12 | M-016037- transmemk    | 131616 TMEM42    | 3019 | 10.831 | 0.779  |
| 50072 I13 | M-010140- chromoson    | 128861 C20orf71  | 3715 | 14.697 | 3.087  |
| 50072 I14 | M-018377- family with  | 131583 FAM43A    | 3158 | 10.925 | 0.685  |
| 50072 I15 | M-015274- chromoson    | 128864 C20orf144 | 3994 | 7.7116 | 3.8984 |
| 50072 I16 | M-015301- leucine ric  | 131578 LRRC15    | 3881 | 5.1018 | 6.5082 |
| 50072 I17 | M-018075- chromatin    | 128866 CHMP4B    | 3517 | 12.226 | 0.616  |
| 50072 I18 | M-016714- discoidin, C | 131566 DCBLD2    | 3946 | 11.379 | 0.231  |
| 50072 I19 | M-017679- high-mobili  | 128872 HMG4L     | 3471 | 12.1   | 0.49   |
| 50072 I20 | M-028137- hypothetic   | 131544 DKFZp667C | 6402 | 20.072 | 8.462  |
| 50072 I21 | M-017694- family with  | 128876 FAM83C    | 5204 | 24.731 | 13.121 |
| 50072 I23 | M-031414- GRB2-assor   | 128954 GAB4      | 4208 | 16.16  | 4.55   |
| 50072 J02 | M-027214- apolipopro   | 139322 APOOL     | 5128 | 14.392 | 2.782  |
| 50072 J04 | M-016075- family with  | 139285 FAM123B   | 4421 | 18.842 | 7.232  |
| 50072 J05 | M-016794- transmemk    | 135932 TMEM139   | 3688 | 11.253 | 0.357  |
| 50072 J06 | M-024785- chromoson    | 139231 CXorf39   | 4364 | 11.366 | 0.244  |
| 50072 J07 | M-007131- zinc finger  | 136051 ZNF786    | 4008 | 9.6557 | 1.9543 |
| 50072 J08 | M-016018- melanoma     | 139221 MUM1L1    | 2828 | 6.7539 | 4.8561 |
| 50072 J09 | M-015349- EMI domai    | 136227 EMID2     | 3504 | 21.005 | 9.395  |

|                  |                              |                     |             |               |              |
|------------------|------------------------------|---------------------|-------------|---------------|--------------|
| 50072 J10        | M-018476- chromoson          | 139212 CXorf41      | 4717        | 15.603        | 3.993        |
| 50072 J11        | M-016003- chromoson          | 136263 C7orf45      | 4328        | 19.524        | 7.914        |
| 50072 J12        | M-017873- WD repeat          | 139170 WDR40B       | 2508        | 7.0973        | 4.5127       |
| 50072 J13        | M-025330- hypothetic         | 136288 LOC136288    | 2706        | 9.5713        | 2.0387       |
| 50072 J14        | M-018473- PAS domain         | 139135 PASD1        | 3740        | 8.9572        | 2.6528       |
| 50072 J15        | M-007346- SVOP-like          | 136306 SVOPL        | 3427        | 9.8629        | 1.7471       |
| 50072 J16        | M-016795- chromoson          | 139105 CXorf20      | 4004        | 7.6673        | 3.9427       |
| 50072 J17        | M-016817- myotrophin         | 136319 MTPN         | 3609        | 5.9573        | 5.6527       |
| 50072 J18        | M-017734- SLIT and NRP1      | 139065 SLITRK4      | 5114        | 5.4556        | 6.1544       |
| 50072 J19        | M-015997- leucine-rich       | 136332 LRGUK        | 5446        | 11.733        | 0.123        |
| 50072 J20        | M-031963- olfactory receptor | 138883 OR1N1        | 4167        | 9.5752        | 2.0348       |
| 50072 J21        | M-007725- ankyrin repeat     | 136371 ASB10        | 3805        | 13.246        | 1.636        |
| 50072 J23        | M-016379- chromoson          | 136647 C7orf11      | 2622        | 10.336        | 1.274        |
| 50072 K02        | M-015990- zinc finger,       | 131540 ZDHHC19      | 3279        | 4.5441        | 7.0659       |
| 50072 K04        | M-016042- coiled-coil        | 131474 CHCHD4       | 3788        | 10.929        | 0.681        |
| 50072 K05        | M-016397- chromoson          | 128989 C22orf25     | 1765        | 12.295        | 0.685        |
| 50072 K06        | M-018738- family with        | 131408 FAM131A      | 3990        | 11.579        | 0.031        |
| 50072 K07        | M-010919- suppressor         | 129025 SUHW1        | 4116        | 14.772        | 3.162        |
| 50072 K08        | M-016211- kelch repeat       | 131377 KBTBD5       | 4492        | 8.6598        | 2.9502       |
| 50072 K09        | M-010918- hypothetic         | 129026 LOC129026    | 4406        | 8.2615        | 3.3485       |
| 50072 K10        | M-015984- lysozyme-like      | 131375 LYZL4        | 2413        | 3.6884        | 7.9216       |
| 50072 K11        | M-024557- RUN and TFI        | 129049 RUTBC2       | 3176        | 4.534         | 7.076        |
| 50072 K12        | M-018006- zona pellucida     | 131368 ZPLD1        | 3776        | 12.474        | 0.864        |
| 50072 K13        | M-015347- EMI domain         | 129080 EMID1        | 2483        | 3.0608        | 8.5492       |
| <b>50072 K14</b> | <b>M-016533- family with</b> | <b>131177 FAM3D</b> | <b>3952</b> | <b>14.853</b> | <b>3.243</b> |
| 50072 K15        | M-016583- ankyrin repeat     | 129138 ANKRD54      | 2822        | 11.942        | 0.332        |
| 50072 K16        | M-016024- DnaJ (Hsp40)       | 131118 DNAJC19      | 3845        | 5.9558        | 5.6542       |
| 50072 K17        | M-017065- coiled-coil        | 129285 CCDC128      | 4876        | 11.998        | 0.388        |
| 50072 K18        | M-008546- copine IV          | 131034 CPNE4        | 3295        | 4.0061        | 7.6039       |
| 50072 K19        | M-022729- hypothetic         | 129293 LOC129293    | 4146        | 4.9204        | 6.6896       |
| 50072 K20        | M-016733- hypothetic         | 130951 LOC130951    | 4676        | 7.7203        | 3.8897       |
| 50072 K21        | M-016669- transmembrane      | 129303 TMEM150      | 3575        | 15.021        | 3.411        |
| 50072 K23        | M-018998- nucleoporin        | 129401 NUP35        | 3983        | 10.846        | 0.764        |
| 50072 L02        | M-031891- chromoson          | 138724 C9orf131     | 5031        | 13.238        | 1.628        |
| 50072 L04        | M-017493- chromoson          | 138716 C9orf23      | 3860        | 11.995        | 0.385        |
| 50072 L05        | M-015935- chromoson          | 136895 C7orf31      | 3384        | 9.3085        | 2.3015       |
| 50072 L06        | M-029567- AT rich inter      | 138715 ARID3C       | 4365        | 11.638        | 0.028        |
| 50072 L07        | M-015293- ankyrin repeat     | 136991 ASZ1         | 5547        | 15.54         | 3.93         |
| 50072 L08        | M-026263- ankyrin repeat     | 138649 ANKRD19      | 5617        | 13.797        | 2.187        |
| 50072 L09        | M-019324- claudin 23         | 137075 CLDN23       | 3620        | 13.011        | 1.401        |
| 50072 L10        | M-026208- peptidyl-tRNA      | 138428 PTRH1        | 2734        | 9.4001        | 2.2099       |
| 50072 L11        | M-016324- coiled-coil        | 137196 CCDC26       | 4255        | 19.412        | 7.802        |
| 50072 L12        | M-016278- family with        | 138311 FAM69B       | 2523        | 8.5216        | 3.0884       |
| 50072 L13        | M-029365- otoconin 9b        | 137202 OC90         | 3012        | 8.7649        | 2.8451       |
| 50072 L14        | M-019397- chromoson          | 138241 C9orf85      | 2659        | 11.282        | 0.328        |
| 50072 L15        | M-007133- zinc finger        | 137209 ZNF572       | 4285        | 13.722        | 2.112        |
| 50072 L16        | M-026002- chromoson          | 138240 C9orf57      | 4657        | 15.589        | 3.979        |

|           |                        |                  |      |        |        |
|-----------|------------------------|------------------|------|--------|--------|
| 50072 L17 | M-016864- glutamic-o:  | 137362 GOT1L1    | 4695 | 22.322 | 10.712 |
| 50072 L18 | M-016365- chromoson    | 138199 C9orf41   | 4213 | 13.672 | 2.062  |
| 50072 L19 | M-016046- family with  | 137392 FAM92A1   | 4703 | 10.057 | 1.553  |
| 50072 L20 | M-015933- chromoson    | 138162 C9orf116  | 4634 | 16.854 | 5.244  |
| 50072 L21 | M-026897- E2F transcr  | 144455 E2F7      | 3320 | 12.47  | 0.86   |
| 50072 L23 | M-018941- keratin 80   | 144501 KRT80     | 4147 | 13.238 | 1.628  |
| 50072 M02 | M-018279- hypothetic:  | 130940 LOC130940 | 5538 | 7.8187 | 3.7913 |
| 50072 M04 | M-018834- MTERF dor    | 130916 MTERFD2   | 2160 | 12.315 | 0.705  |
| 50072 M05 | M-016468- hypothetic:  | 129450 FLJ37953  | 3011 | 11.192 | 0.418  |
| 50072 M06 | M-018460- F-box prote  | 130888 FBXO36    | 4805 | 19.334 | 7.724  |
| 50072 M07 | M-017774- hypothetic:  | 129530 LOC129530 | 4644 | 11.154 | 0.456  |
| 50072 M08 | M-016045- transmemk    | 130827 TMEM182   | 5821 | 10.6   | 1.01   |
| 50072 M09 | M-016584- MIT, micro   | 129531 MITD1     | 6208 | 22.552 | 10.942 |
| 50072 M10 | M-016552- PQ loop rej  | 130814 PQLC3     | 4269 | 13.118 | 1.508  |
| 50072 M11 | M-018715- DIS3 mitoti  | 129563 DIS3L2    | 5535 | 11.906 | 0.296  |
| 50072 M12 | M-018692- chromoson    | 130813 C2orf50   | 2980 | 11.946 | 0.336  |
| 50072 M13 | M-006746- hypothetic:  | 129607 LOC129607 | 2846 | 15.706 | 4.096  |
| 50072 M14 | M-023122- malate deh   | 130752 MDH1B     | 3906 | 9.447  | 2.163  |
| 50072 M15 | M-010299- membrane     | 129642 MBOAT2    | 5428 | 17.502 | 5.892  |
| 50072 M16 | M-016560- transmemk    | 130733 TMEM178   | 5232 | 12.347 | 0.737  |
| 50072 M17 | M-010914- contactin a  | 129684 CNTNAP5   | 3824 | 9.1527 | 2.4573 |
| 50072 M18 | M-016566- hypothetic:  | 130619 MGC35338  | 5112 | 9.7222 | 1.8878 |
| 50072 M19 | M-015912- taube nuss   | 129685 TBN       | 4368 | 5.8608 | 5.7492 |
| 50072 M20 | M-016586- zinc finger, | 130617 ZFAND2B   | 5603 | 21.578 | 9.968  |
| 50072 M21 | M-016932- transmemk    | 129787 TMEM18    | 4482 | 16.756 | 5.146  |
| 50072 M23 | M-014942- chromoson    | 129790 C7orf13   | 3187 | 7.813  | 3.797  |
| 50072 N02 | M-015957- BTB (POZ) c  | 138151 BTBD14A   | 5716 | 15.238 | 3.628  |
| 50072 N04 | M-007134- ring finger  | 138065 RNF183    | 2834 | 12.915 | 1.305  |
| 50072 N05 | M-016506- amidohydr    | 144193 AMDHD1    | 3770 | 14.43  | 2.82   |
| 50072 N06 | M-025981- heparan-al   | 138050 HGSNAT    | 4390 | 12.688 | 1.078  |
| 50072 N07 | M-007514- solute carri | 144195 SLC2A14   | 3414 | 6.1511 | 5.4589 |
| 50072 N08 | M-017769- hypothetic:  | 138046 LOC138046 | 6462 | 11.962 | 0.352  |
| 50072 N09 | M-018768- BCDIN3 do    | 144233 BCDIN3D   | 4943 | 22.719 | 11.109 |
| 50072 N10 | M-016929- WD repeat    | 138009 WDR21C    | 3634 | 16.07  | 4.46   |
| 50072 N11 | M-016617- GLI pathog   | 144321 GLIPR1L2  | 5269 | 16.815 | 5.205  |
| 50072 N12 | M-015974- leucine zip  | 137994 LETM2     | 2638 | 33.397 | 21.787 |
| 50072 N13 | M-018737- family with  | 144347 FAM101A   | 3490 | 18.739 | 7.129  |
| 50072 N14 | M-015286- unc-5 hom    | 137970 UNC5D     | 2945 | 21.392 | 9.782  |
| 50072 N15 | M-016535- zinc finger  | 144348 ZNF664    | 4114 | 17.307 | 5.697  |
| 50072 N16 | M-010300- 1-acylglyce  | 137964 AGPAT6    | 3538 | 17.411 | 5.801  |
| 50072 N17 | M-015852- hypothetic:  | 144360 FLJ32894  | 5483 | 11.964 | 0.354  |
| 50072 N18 | M-008450- peroxidasir  | 137902 PXDNL     | 3549 | 15.356 | 3.746  |
| 50072 N19 | M-030130- LYR motif c  | 144363 LYRM5     | 5676 | 14.693 | 3.083  |
| 50072 N20 | M-025945- hypothetic:  | 137886 LOC137886 | 3961 | 14.592 | 2.982  |
| 50072 N21 | M-017584- copine VIII  | 144402 CPNE8     | 5682 | 13.745 | 2.135  |
| 50072 N23 | M-015772- WD repeat    | 144406 WDR66     | 5478 | 22.015 | 10.405 |
| 50072 O02 | M-008396- galactose n  | 130589 GALM      | 4963 | 19.222 | 7.612  |



|           |                        |                  |         |         |          |
|-----------|------------------------|------------------|---------|---------|----------|
| 50072 O04 | M-017984- hypothetical | 130576 LOC130576 | 3457    | 11.224  | 0.386    |
| 50072 O05 | M-016726- hypothetical | 129804 FLJ37440  | 4496    | 10.609  | 1.001    |
| 50072 O06 | M-019328- LY6/PLAUR    | 130574 LYPD6     | 3765    | 14.555  | 2.945    |
| 50072 O07 | M-013263- sialidase 4  | 129807 NEU4      | 4303    | 4.3923  | 7.2177   |
| 50072 O08 | M-007128- zinc finger  | 130557 ZNF513    | 3676    | 9.7661  | 1.8439   |
| 50072 O09 | M-022681- hypothetical | 129852 FLJ40298  | 4954    | 17.44   | 5.83     |
| 50072 O10 | M-016962- potassium    | 130535 KCTD18    | 5054    | 25.03   | 13.42    |
| 50072 O11 | M-007127- tripartite r | 129868 TRIM43    | 4421    | 12.373  | 0.763    |
| 50072 O12 | M-016653- zinc finger  | 130507 ZNF650    | 4640    | 22.802  | 11.192   |
| 50072 O13 | M-016478- Bardet-Bier  | 129880 BBS5      | 3326    | 16.386  | 4.776    |
| 50072 O14 | M-016029- odd-skippe   | 130497 OSR1      | 3640    | 15.275  | 3.665    |
| 50072 O15 | M-027990- hypothetical | 129881 LOC129881 | 4895    | 22.308  | 10.698   |
| 50072 O16 | M-015727- sphingosin   | 130367 SGPP2     | 4502    | 7.53    | 4.08     |
| 50072 O17 | M-031904- amyotroph    | 130029 ALS2CR16  | 3580    | 12.291  | 0.681    |
| 50072 O18 | M-018537- adaptor-rel  | 130340 AP1S3     | 3736    | 10.278  | 1.332    |
| 50072 O19 | M-027212- regeneratir  | 130120 REG3G     | 5534    | 13.625  | 2.015    |
| 50072 O20 | M-022669- pleckstrin f | 130271 PLEKHH2   | 5730    | 14.031  | 2.421    |
| 50072 O21 | M-016049- raftlin fami | 130132 RFTN2     | 5681    | 21.141  | 9.531    |
| 50072 O23 | M-016356- hypothetical | 130162 FLJ31438  | 4107    | 8.5707  | 3.0393   |
| 50072 P02 | M-010970- sarcoglycar  | 137868 SGCZ      | 2974    | 5.8171  | 5.7929   |
| 50072 P04 | M-015995- transmemk    | 137835 TMEM71    | 2710    | 10.923  | 0.687    |
| 50072 P05 | M-015840- glycosyltra  | 144423 GLT1D1    | 2320    | 6.3793  | 5.2307   |
| 50072 P06 | M-031903- LY6/PLAUR    | 137797 LYPD2     | 2603    | 4.3796  | 7.2304   |
| 50072 P07 | M-016337- bestrophin   | 144453 BEST3     | 4438    | 13.249  | 1.639    |
| 50072 P08 | M-015426- transmemk    | 137695 TMEM68    | 1625    | 7.5077  | 4.1023   |
| 50072 P09 | M-015775- alpha-2-ma   | 144568 A2ML1     | 3416    | 9.8068  | 1.8032   |
| 50072 P10 | M-016179- chromoson    | 137682 C8orf38   | 4478    | 16.972  | 5.362    |
| 50072 P11 | M-016222- hypothetical | 144577 FLJ32549  | 2142    | 7.423   | 4.187    |
| 50072 P12 | M-016816- vacuolar pr  | 137492 VPS37A    | 3425    | 11.883  | 0.273    |
| 50072 P13 | M-017966- chromoson    | 144608 C12orf60  | 3062    | 16.264  | 4.654    |
| 50072 P14 | M-018491- ovostatin 2  | 144203 OVOS2     | 2991    | 11.568  | 0.042    |
| 50072 P15 | M-022992- family with  | 144638 FAM10A3   | 2743    | 7.109   | 4.501    |
| 50072 P16 | M-030232- hypothetical | 144766 LOC144766 | 2761    | 9.8515  | 1.7585   |
| 50072 P17 | M-030145- hypothetical | 144678 LOC144678 | 4004    | 10.714  | 0.896    |
| 50072 P18 | M-019322- hypothetical | 144747 LOC144747 | 1833    | 9.9291  | 1.6809   |
| 50072 P19 | M-015718- F-box and l  | 144699 FBXL14    | 3298    | 11.552  | 0.058    |
| 50072 P20 | M-030176- hypothetical | 144742 LOC144742 | 2594    | 20.162  | 8.552    |
| 50072 P21 | M-016177- RAD9 hom     | 144715 RAD9B     | 2126    | 13.735  | 2.125    |
| 50072 P23 | M-015976- family with  | 144717 FAM109A   | 1980    | 8.0303  | 3.5797   |
|           |                        | MAD              | 3650    | 11.6085 | 3.37765  |
|           |                        | MAD3             |         |         | 10.13295 |
|           |                        | MADc             |         |         | 4.998922 |
| 50072 C22 |                        |                  | 1062    | 8.4746  |          |
| 50072 D22 |                        |                  | 1588    | 3.5894  |          |
| 50072 E22 |                        |                  | 1489    | 12.424  |          |
| 50072 F22 |                        |                  | 3014    | 11.513  |          |
|           |                        | mn               | 1788.25 | 9.00025 |          |

|           |  |           |          |          |
|-----------|--|-----------|----------|----------|
|           |  | sd        | 848.4403 | 3.982863 |
| 50072 G22 |  |           | 4217     | 41.807   |
| 50072 H22 |  |           | 3689     | 53.212   |
| 50072 I22 |  |           | 4823     | 57.91    |
| 50072 J22 |  |           | 4101     | 46.135   |
|           |  | mn        | 4207.5   | 49.766   |
|           |  | sd        | 468.727  | 7.181678 |
|           |  | 3psSD     |          | 21.54503 |
|           |  | 3ngSD     |          | 11.94859 |
|           |  | SumSD     |          | 33.49362 |
|           |  | DiffMn    |          | 40.76575 |
|           |  | SmovrDiff |          | 0.821612 |
|           |  | 1minus    |          | 0.178388 |

|           |                                   |                |      |        |
|-----------|-----------------------------------|----------------|------|--------|
| 50072 G03 | M-003290- polo-like ki            | 5347 PLK1 SMAR | 558  | 6.9892 |
| 50072 H03 | M-003290- polo-like ki            | 5347 PLK1 SMAR | 601  | 26.789 |
| 50072 I03 | D-001206- siControl non-targeting |                | 4035 | 11.673 |
| 50072 J03 | D-001206- siControl non-targeting |                | 4047 | 16.728 |
| 50072 K03 | D-001600- (siGLO RISC-free siRNA  |                | 4145 | 19.469 |
| 50072 L03 | D-001600- (siGLO RISC-free siRNA  |                | 5731 | 19.682 |

| rZ              | cell ct     | % inf         | AD            | rZ              | cell ct     | % inf         | AD           | rZ              |
|-----------------|-------------|---------------|---------------|-----------------|-------------|---------------|--------------|-----------------|
| -1.25649        | 3721        | 6.9874        | 2.8226        | -0.59674        | 3014        | 7.5315        | 5.7985       | -0.96532        |
| 0.431793        | 3101        | 13.995        | 4.185         | 0.883276        | 3639        | 18.274        | 4.944        | 0.824456        |
| 0.483204        | 3530        | 9.5751        | 0.2349        | -0.05021        | 3123        | 19.18         | 5.85         | 0.975402        |
| -0.12453        | 2984        | 11.83         | 2.02          | 0.426025        | 2976        | 16.331        | 3.001        | 0.500738        |
| 0.024105        | 4104        | 5.4825        | 4.3275        | -0.91458        | 2930        | 10.648        | 2.682        | -0.44609        |
| <b>3.036955</b> | <b>3418</b> | <b>23.61</b>  | <b>13.8</b>   | <b>2.913978</b> | <b>3575</b> | <b>21.846</b> | <b>8.516</b> | <b>1.419577</b> |
| -0.48222        | 2868        | 3.8354        | 5.9746        | -1.26245        | 3500        | 14.229        | 0.899        | 0.15053         |
| 0.845482        | 2820        | 7.1277        | 2.6823        | -0.56711        | 3675        | 17.469        | 4.139        | 0.690337        |
| 0.296164        | 2841        | 12.144        | 2.334         | 0.492342        | 3188        | 21.55         | 8.22         | 1.370261        |
| -0.19874        | 2091        | 8.1301        | 1.6799        | -0.3554         | 2198        | 7.9618        | 5.3682       | -0.89363        |
| 0.55782         | 1900        | 6.2632        | 3.5468        | -0.74969        | 3007        | 11.872        | 1.458        | -0.24216        |
| 1.871904        | 3165        | 13.997        | 4.187         | 0.883699        | 3958        | 21.147        | 7.817        | 1.303119        |
| 0.576224        | 2669        | 9.2544        | 0.5556        | -0.11795        | 3288        | 10.036        | 3.294        | -0.54805        |
| -0.19474        | 1994        | 9.5286        | 0.2814        | -0.06003        | 2020        | 7.6733        | 5.6567       | -0.9417         |
| -0.68447        | 2786        | 6.7121        | 3.0979        | -0.65488        | 3269        | 8.6877        | 4.6423       | -0.77269        |
| 0.321969        | 3745        | 9.3191        | 0.4909        | -0.10428        | 3165        | 14.06         | 0.73         | 0.122373        |
| 0.041909        | 2015        | 7.9404        | 1.8696        | -0.39546        | 2652        | 13.462        | 0.132        | 0.022742        |
| <b>3.343421</b> | <b>2012</b> | <b>27.535</b> | <b>17.725</b> | <b>3.742944</b> | <b>4363</b> | <b>30.85</b>  | <b>17.52</b> | <b>2.919709</b> |
| 0.623634        | 3659        | 11.233        | 1.423         | 0.299938        | 4659        | 9.8948        | 3.4352       | -0.57158        |
| 1.140546        | 2543        | 16.595        | 6.785         | 1.4324          | 4030        | 13.846        | 0.516        | 0.086719        |
| -1.18584        | 3977        | 6.1856        | 3.6244        | -0.76608        | 4624        | 7.7638        | 5.5662       | -0.92662        |
| -0.54912        | 3833        | 7.0702        | 2.7398        | -0.57925        | 4218        | 15.742        | 2.412        | 0.402606        |
| -1.1859         | 4118        | 6.508         | 3.302         | -0.69799        | 3803        | 9.6766        | 3.6534       | -0.60793        |
| -1.12524        | 2445        | 7.1166        | 2.6934        | -0.56945        | 4518        | 8.9641        | 4.3659       | -0.72664        |
| -1.54729        | 2808        | 6.5171        | 3.2929        | -0.69607        | 2472        | 4.8544        | 8.4756       | -1.41135        |
| -1.35391        | 4325        | 9.9653        | 0.1553        | 0.032198        | 3804        | 12.224        | 1.106        | -0.18352        |
| -0.92418        | 4239        | 8.7992        | 1.0108        | -0.21408        | 4155        | 10.782        | 2.548        | -0.42377        |
| -1.25213        | 4105        | 3.4105        | 6.3995        | -1.35219        | 4117        | 10.444        | 2.886        | -0.48008        |
| -1.74404        | 4323        | 8.7671        | 1.0429        | -0.22086        | 3376        | 11.789        | 1.541        | -0.25599        |
| -1.01586        | 3547        | 6.5689        | 3.2411        | -0.68513        | 3365        | 10.045        | 3.285        | -0.54656        |
| -1.83518        | 3653        | 4.5168        | 5.2932        | -1.11853        | 2773        | 9.304         | 4.026        | -0.67001        |
| -1.26401        | 3087        | 10.301        | 0.491         | 0.103098        | 3230        | 15.789        | 2.459        | 0.410437        |
| -0.23015        | 5160        | 10.116        | 0.306         | 0.064026        | 4003        | 23.832        | 10.502       | 1.750459        |
| -1.71485        | 4566        | 8.3224        | 1.4876        | -0.31479        | 3730        | 15.684        | 2.354        | 0.392943        |
| -0.94444        | 4188        | 10.196        | 0.386         | 0.080922        | 2733        | 13.721        | 0.391        | 0.065893        |
| -1.79749        | 5328        | 7.958         | 1.852         | -0.39175        | 3517        | 10.037        | 3.293        | -0.54789        |
| 0.283561        | 6904        | 20.032        | 10.222        | 2.158299        | 6461        | 19.656        | 6.326        | 1.054707        |
| -0.23815        | 6431        | 20.51         | 10.7          | 2.259254        | 6139        | 23.88         | 10.55        | 1.758456        |
| -1.03932        | 3855        | 5.0584        | 4.7516        | -1.00415        | 3511        | 12.589        | 0.741        | -0.12271        |
| -1.50074        | 4476        | 8.6908        | 1.1192        | -0.23698        | 4124        | 8.8991        | 4.4309       | -0.73747        |
| -1.00436        | 4040        | 7.698         | 2.112         | -0.44666        | 5263        | 17.386        | 4.056        | 0.676509        |
| -0.31397        | 4316        | 7.1131        | 2.6969        | -0.57019        | 6244        | 15.999        | 2.669        | 0.445424        |
| -0.16193        | 4141        | 10.843        | 1.033         | 0.217569        | 4645        | 16.835        | 3.505        | 0.584708        |
| -0.18094        | 5126        | 11.959        | 2.149         | 0.45327         | 5122        | 19.309        | 5.979        | 0.996894        |
| -0.29956        | 5082        | 9.819         | 0.009         | 0.001299        | 4795        | 18.811        | 5.481        | 0.913924        |
| -0.15593        | 3647        | 9.8437        | 0.0337        | 0.006516        | 3289        | 17.604        | 4.274        | 0.712829        |

|                 |             |               |               |                 |             |               |               |                 |
|-----------------|-------------|---------------|---------------|-----------------|-------------|---------------|---------------|-----------------|
| 0.127728        | 4763        | 10.603        | 0.793         | 0.166881        | 3969        | 22.701        | 9.371         | 1.562026        |
| 1.776483        | 4100        | 6.8049        | 3.0051        | -0.63528        | 3323        | 18.688        | 5.358         | 0.893431        |
| -0.20854        | 4187        | 9.6967        | 0.1133        | -0.02453        | 3581        | 21.726        | 8.396         | 1.399584        |
| -0.84338        | 3717        | 7.2908        | 2.5192        | -0.53266        | 3123        | 11.687        | 1.643         | -0.27299        |
| -0.33771        | 3354        | 10.078        | 0.268         | 0.056           | 3125        | 24.384        | 11.054        | 1.842426        |
| 0.419991        | 4104        | 15.01         | 5.2           | 1.097646        | 3621        | 29.274        | 15.944        | 2.657136        |
| 0.338773        | 4013        | 5.7563        | 4.0537        | -0.85675        | 2962        | 16.914        | 3.584         | 0.59787         |
| -1.16199        | 4421        | 9.4323        | 0.3777        | -0.08037        | 2960        | 17.905        | 4.575         | 0.762978        |
| 0.13973         | 5167        | 9.1542        | 0.6558        | -0.13911        | 2958        | 24.104        | 10.774        | 1.795776        |
| <b>2.382614</b> | <b>6237</b> | <b>19.929</b> | <b>10.119</b> | <b>2.136546</b> | <b>3851</b> | <b>31.161</b> | <b>17.831</b> | <b>2.971523</b> |
| 0.55822         | 4434        | 18.245        | 8.435         | 1.780882        | 5052        | 30.998        | 17.668        | 2.944367        |
| -0.0197         | 5056        | 11.669        | 1.859         | 0.392022        | 4614        | 27.958        | 14.628        | 2.43788         |
| 1.756079        | 4536        | 14.815        | 5.005         | 1.056461        | 5044        | 26.983        | 13.653        | 2.275438        |
| -1.27127        | 3855        | 7.4968        | 2.3132        | -0.48915        | 4440        | 11.036        | 2.294         | -0.38145        |
| -1.7715         | 4835        | 6.5357        | 3.2743        | -0.69214        | 5176        | 12.519        | 0.811         | -0.13437        |
| -0.7381         | 4668        | 19.152        | 9.342         | 1.972442        | 4736        | 21.305        | 7.975         | 1.329442        |
| -0.59035        | 3913        | 10.018        | 0.208         | 0.043328        | 2814        | 12.189        | 1.141         | -0.18935        |
| -2.02066        | 3311        | 4.4397        | 5.3703        | -1.13482        | 2641        | 8.3302        | 4.9998        | -0.83225        |
| -1.77158        | 4490        | 6.9933        | 2.8167        | -0.59549        | 1845        | 7.5339        | 5.7961        | -0.96492        |
| -1.47868        | 5138        | 11.97         | 2.16          | 0.455593        | 3633        | 20.451        | 7.121         | 1.18716         |
| -0.12213        | 5565        | 18.005        | 8.195         | 1.730194        | 2888        | 15.132        | 1.802         | 0.300976        |
| -1.04214        | 4396        | 14.126        | 4.316         | 0.910944        | 1927        | 17.385        | 4.055         | 0.676342        |
| -0.64952        | 4135        | 10.931        | 1.121         | 0.236155        | 2218        | 23.084        | 9.754         | 1.625837        |
| -0.88799        | 4329        | 15.292        | 5.482         | 1.157204        | 2632        | 19.453        | 6.123         | 1.020886        |
| -1.08125        | 3136        | 11.639        | 1.829         | 0.385686        | 1920        | 21.354        | 8.024         | 1.337606        |
| -0.648          | 3798        | 12.138        | 2.328         | 0.491075        | 3493        | 15.918        | 2.588         | 0.431929        |
| -1.7808         | 3625        | 4.9931        | 4.8169        | -1.01794        | 1540        | 9.7403        | 3.5897        | -0.59732        |
| -1.29234        | 4541        | 8.214         | 1.596         | -0.33768        | 4333        | 16.963        | 3.633         | 0.606034        |
| 0.361378        | 5350        | 21.421        | 11.611        | 2.451658        | 2325        | 24.387        | 11.057        | 1.842926        |
| 0.498207        | 6020        | 21.595        | 11.785        | 2.488407        | 3582        | 23.311        | 9.981         | 1.663657        |
| -0.25175        | 4611        | 10.128        | 0.318         | 0.06656         | 2632        | 13.336        | 0.006         | 0.001749        |
| -0.65234        | 4025        | 15.106        | 5.296         | 1.117921        | 3378        | 11.308        | 2.022         | -0.33613        |
| -0.46322        | 5150        | 6.9709        | 2.8391        | -0.60022        | 5357        | 11.424        | 1.906         | -0.3168         |
| -0.62926        | 2645        | 14.896        | 5.086         | 1.073569        | 2458        | 14.361        | 1.031         | 0.172522        |
| 0.164736        | 4963        | 2.4783        | 7.3317        | -1.54907        | 4169        | 3.55          | 9.78          | -1.62867        |
| 0.50861         | 3259        | 5.8607        | 3.9493        | -0.8347         | 2384        | 9.5218        | 3.8082        | -0.63372        |
| -0.27916        | 5411        | 7.1706        | 2.6394        | -0.55805        | 3990        | 6.7419        | 6.5881        | -1.09688        |
| 0.355577        | 5290        | 7.7316        | 2.0784        | -0.43956        | 4893        | 6.7648        | 6.5652        | -1.09306        |
| 0.997515        | 3637        | 7.7261        | 2.0839        | -0.44072        | 3369        | 4.8085        | 8.5215        | -1.41899        |
| -0.54806        | 4954        | 4.6629        | 5.1471        | -1.08768        | 4187        | 7.7621        | 5.5679        | -0.9269         |
| 1.274575        | 3461        | 3.2072        | 6.6028        | -1.39512        | 3498        | 4.3168        | 9.0132        | -1.50091        |
| 0.822077        | 4331        | 6.6036        | 3.2064        | -0.6778         | 3483        | 9.532         | 3.798         | -0.63202        |
| 0.839281        | 3495        | 4.8069        | 5.0031        | -1.05726        | 3346        | 6.7244        | 6.6056        | -1.09979        |
| -0.11392        | 3293        | 15.062        | 5.252         | 1.108628        | 3346        | 6.7543        | 6.5757        | -1.09481        |
| 0.287362        | 1868        | 3.8009        | 6.0091        | -1.26973        | 2799        | 7.4312        | 5.8988        | -0.98203        |
| 1.848899        | 3849        | 7.8722        | 1.9378        | -0.40987        | 4358        | 11.634        | 1.696         | -0.28182        |
| -0.48326        | 3121        | 9.1317        | 0.6783        | -0.14386        | 3750        | 8.0533        | 5.2767        | -0.87839        |

|                 |             |               |               |                 |             |              |              |                 |
|-----------------|-------------|---------------|---------------|-----------------|-------------|--------------|--------------|-----------------|
| 0.301965        | 3718        | 10.059        | 0.249         | 0.051987        | 3814        | 12.48        | 0.85         | -0.14087        |
| 0.587627        | 3113        | 8.0951        | 1.7149        | -0.36279        | 3842        | 14.003       | 0.673        | 0.112876        |
| 2.075147        | 3923        | 10.324        | 0.514         | 0.107956        | 3837        | 13.683       | 0.353        | 0.059562        |
| -1.44493        | 3576        | 5.8725        | 3.9375        | -0.83221        | 5303        | 6.4115       | 6.9185       | -1.15192        |
| -0.47424        | 3249        | 4.8323        | 4.9777        | -1.0519         | 4782        | 9.724        | 3.606        | -0.60004        |
| 1.136545        | 2639        | 8.526         | 1.284         | -0.27178        | 4383        | 13.895       | 0.565        | 0.094883        |
| 0.114925        | 3015        | 8.1592        | 1.6508        | -0.34925        | 5467        | 15.054       | 1.724        | 0.287981        |
| -0.62117        | 5506        | 5.9208        | 3.8892        | -0.82201        | 5161        | 6.2197       | 7.1103       | -1.18388        |
| -0.97559        | 5697        | 6.8808        | 2.9292        | -0.61925        | 4314        | 9.2258       | 4.1042       | -0.68304        |
| -0.48456        | 5867        | 4.9599        | 4.8501        | -1.02495        | 5314        | 7.4332       | 5.8968       | -0.9817         |
| 0.886891        | 5799        | 11.812        | 2.002         | 0.422223        | 5386        | 11.53        | 1.8          | -0.29914        |
| 1.041725        | 5057        | 11.588        | 1.778         | 0.374914        | 3344        | 12.978       | 0.352        | -0.0579         |
| -1.60341        | 5462        | 5.639         | 4.171         | -0.88152        | 3912        | 8.7423       | 4.5877       | -0.76359        |
| -1.24233        | 5043        | 3.9857        | 5.8243        | -1.2307         | 4009        | 12.023       | 1.307        | -0.21701        |
| 0.178338        | 5368        | 6.3338        | 3.4762        | -0.73478        | 3367        | 13.959       | 0.629        | 0.105546        |
| -0.86665        | 3350        | 9.7612        | 0.0488        | -0.01091        | 2856        | 7.2129       | 6.1171       | -1.0184         |
| -0.11452        | 4891        | 5.3159        | 4.4941        | -0.94976        | 3831        | 7.8309       | 5.4991       | -0.91544        |
| -0.29556        | 4416        | 6.9746        | 2.8354        | -0.59944        | 3473        | 11.229       | 2.101        | -0.34929        |
| 1.321785        | 3339        | 12.099        | 2.289         | 0.482838        | 3265        | 14.487       | 1.157        | 0.193514        |
| -0.43055        | 3267        | 4.8056        | 5.0044        | -1.05754        | 3206        | 11.135       | 2.195        | -0.36495        |
| 1.017719        | 4425        | 12.859        | 3.049         | 0.643351        | 2880        | 19.479       | 6.149        | 1.025218        |
| -0.6723         | 4382        | 6.7549        | 3.0551        | -0.64584        | 4605        | 11.379       | 1.951        | -0.3243         |
| <b>4.398448</b> | <b>3977</b> | <b>29.872</b> | <b>20.062</b> | <b>4.236522</b> | <b>3882</b> | <b>27.28</b> | <b>13.95</b> | <b>2.324921</b> |
| -0.98707        | 4060        | 5.0246        | 4.7854        | -1.01129        | 4071        | 8.1552       | 5.1748       | -0.86141        |
| -0.61161        | 4213        | 3.2281        | 6.5819        | -1.39071        | 5210        | 12.265       | 1.065        | -0.17669        |
| 0.691649        | 5233        | 6.9941        | 2.8159        | -0.59532        | 5518        | 13.701       | 0.371        | 0.062561        |
| 0.079117        | 3470        | 4.0922        | 5.7178        | -1.20821        | 5900        | 9.9661       | 3.3639       | -0.5597         |
| 0.034307        | 4893        | 19.027        | 9.217         | 1.946042        | 3918        | 8.6524       | 4.6776       | -0.77857        |
| 0.18634         | 2909        | 18.529        | 8.719         | 1.840864        | 4685        | 19.637       | 6.307        | 1.051542        |
| 1.583841        | 2861        | 30.129        | 20.319        | 4.2908          | 3499        | 15.547       | 2.217        | 0.370118        |
| -0.77567        | 3592        | 10.245        | 0.435         | 0.091271        | 4845        | 14.448       | 1.118        | 0.187017        |
| -0.65858        | 2287        | 8.6139        | 1.1961        | -0.25322        | 2899        | 7.4508       | 5.8792       | -0.97877        |
| -1.60665        | 3488        | 4.7592        | 5.0508        | -1.06734        | 3237        | 13.315       | 0.015        | -0.00175        |
| -1.06449        | 2619        | 8.9729        | 0.8371        | -0.1774         | 3398        | 12.36        | 0.97         | -0.16086        |
| 0.176138        | 2791        | 14.368        | 4.558         | 0.962054        | 3976        | 25.327       | 11.997       | 1.999537        |
| -1.48654        | 2452        | 6.8515        | 2.9585        | -0.62544        | 2974        | 10.188       | 3.142        | -0.52273        |
| -1.22044        | 2091        | 8.8953        | 0.9147        | -0.19379        | 2836        | 14.774       | 1.444        | 0.241331        |
| -1.21318        | 2243        | 14.712        | 4.902         | 1.034708        | 2819        | 13.019       | 0.311        | -0.05107        |
| -1.35675        | 2799        | 11.29         | 1.48          | 0.311976        | 3159        | 16.398       | 3.068        | 0.511901        |
| -1.72151        | 3210        | 6.8536        | 2.9564        | -0.625          | 4157        | 11.21        | 2.12         | -0.35246        |
| 0.157934        | 3641        | 19.72         | 9.91          | 2.092404        | 3518        | 16.856       | 3.526        | 0.588207        |
| 0.921899        | 1859        | 15.976        | 6.166         | 1.301666        | 3325        | 28.541       | 15.211       | 2.535013        |
| 0.610432        | 2953        | 17.982        | 8.172         | 1.725336        | 3578        | 16.294       | 2.964        | 0.494574        |
| -1.12626        | 3370        | 8.9021        | 0.9079        | -0.19235        | 3924        | 12.538       | 0.792        | -0.1312         |
| 0.389184        | 2297        | 13.017        | 3.207         | 0.676721        | 3848        | 21.57        | 8.24         | 1.373593        |
| 0.887491        | 2245        | 15.947        | 6.137         | 1.295541        | 3684        | 19.435       | 6.105        | 1.017887        |
| 0.814876        | 3328        | 15.835        | 6.025         | 1.271887        | 4751        | 21.069       | 7.739        | 1.290123        |

|                 |             |               |               |                 |             |               |               |                 |
|-----------------|-------------|---------------|---------------|-----------------|-------------|---------------|---------------|-----------------|
| 0.980711        | 4130        | 4.3099        | 5.5001        | -1.16223        | 4058        | 16.634        | 3.304         | 0.55122         |
| 1.376797        | 5375        | 15.647        | 5.837         | 1.232181        | 3888        | 25.643        | 12.313        | 2.052185        |
| -0.29836        | 5015        | 7.3579        | 2.4521        | -0.51849        | 3664        | 8.3788        | 4.9512        | -0.82416        |
| 1.277976        | 4514        | 7.9087        | 1.9013        | -0.40216        | 4044        | 20.302        | 6.972         | 1.162335        |
| 1.489221        | 4330        | 11.986        | 2.176         | 0.458972        | 4711        | 15.39         | 2.06          | 0.343961        |
| 1.569838        | 4540        | 13.128        | 3.318         | 0.700164        | 2821        | 19.355        | 6.025         | 1.004558        |
| 0.725256        | 3156        | 7.9214        | 1.8886        | -0.39948        | 3166        | 15.003        | 1.673         | 0.279484        |
| 2.361009        | 4725        | 11.704        | 1.894         | 0.399414        | 3300        | 22.97         | 9.64          | 1.606844        |
| 2.284393        | 3734        | 14.247        | 4.437         | 0.936499        | 3102        | 25.371        | 12.041        | 2.006868        |
| 2.338604        | 2768        | 14.668        | 4.858         | 1.025415        | 2931        | 22.279        | 8.949         | 1.491718        |
| -0.97079        | 3488        | 4.3578        | 5.4522        | -1.15211        | 3647        | 7.2114        | 6.1186        | -1.01865        |
| 0.679046        | 3108        | 14.06         | 4.25          | 0.897004        | 3871        | 20.847        | 7.517         | 1.253136        |
| 1.099937        | 2546        | 11.115        | 1.305         | 0.275016        | 3417        | 23.881        | 10.551        | 1.758623        |
| 0.523613        | 4487        | 12.525        | 2.715         | 0.57281         | 3743        | 22.816        | 9.486         | 1.581186        |
| 1.096136        | 3057        | 10.37         | 0.56          | 0.117671        | 3746        | 19.621        | 6.291         | 1.048876        |
| -1.2914         | 2911        | 9.1721        | 0.6379        | -0.13533        | 3082        | 12.589        | 0.741         | -0.12271        |
| -0.19914        | 3158        | 12.571        | 2.761         | 0.582525        | 3336        | 25            | 11.67         | 1.945056        |
| 0.711053        | 2183        | 9.7114        | 0.0986        | -0.02143        | 2383        | 15.946        | 2.616         | 0.436594        |
| 0.161135        | 2854        | 11.037        | 1.227         | 0.258542        | 3883        | 21.478        | 8.148         | 1.358266        |
| -0.96733        | 2946        | 6.3815        | 3.4285        | -0.72471        | 4257        | 10.218        | 3.112         | -0.51773        |
| -0.44554        | 3983        | 21.341        | 11.531        | 2.434762        | 5499        | 12.584        | 0.746         | -0.12354        |
| 0.053912        | 2570        | 11.556        | 1.746         | 0.368156        | 5484        | 18.928        | 5.598         | 0.933417        |
| 1.870903        | 2602        | 11.261        | 1.451         | 0.305851        | 4164        | 18.396        | 5.066         | 0.844782        |
| 0.560021        | 3533        | 20.521        | 10.711        | 2.261577        | 4827        | 14.999        | 1.669         | 0.278817        |
| -0.19954        | 3336        | 8.0336        | 1.7764        | -0.37578        | 5201        | 10.575        | 2.755         | -0.45825        |
| <b>2.057744</b> | <b>2527</b> | <b>14.721</b> | <b>4.911</b>  | <b>1.036608</b> | <b>5368</b> | <b>27.18</b>  | <b>13.85</b>  | <b>2.30826</b>  |
| -0.12393        | 1873        | 5.9263        | 3.8837        | -0.82084        | 4115        | 6.4642        | 6.8658        | -1.14314        |
| 1.326386        | 2067        | 8.7567        | 1.0533        | -0.22306        | 3274        | 14.722        | 1.392         | 0.232667        |
| -0.37676        | 1960        | 8.0102        | 1.7998        | -0.38072        | 3503        | 12.075        | 1.255         | -0.20834        |
| -0.15553        | 2654        | 16.202        | 6.392         | 1.349398        | 3485        | 15.868        | 2.538         | 0.423599        |
| 0.617833        | 2831        | 10.632        | 0.822         | 0.173006        | 3051        | 15.536        | 2.206         | 0.368285        |
| -0.13673        | 3728        | 13.68         | 3.87          | 0.816748        | 4291        | 15.754        | 2.424         | 0.404606        |
| -0.77955        | 3574        | 3.8612        | 5.9488        | -1.257          | 3170        | 8.4858        | 4.8442        | -0.80633        |
| -1.30162        | 3316        | 5.4885        | 4.3215        | -0.91331        | 4588        | 8.5004        | 4.8296        | -0.8039         |
| 0.123527        | 3034        | 10.613        | 0.803         | 0.168993        | 3969        | 16.251        | 2.921         | 0.487409        |
| -0.04591        | 3734        | 12.721        | 2.911         | 0.614205        | 5227        | 13.143        | 0.187         | -0.03041        |
| 0.098321        | 2592        | 13.002        | 3.192         | 0.673553        | 4697        | 20.502        | 7.172         | 1.195657        |
| 1.693065        | 3938        | 11.605        | 1.795         | 0.378505        | 5444        | 13.666        | 0.336         | 0.05673         |
| <b>2.625066</b> | <b>3034</b> | <b>20.567</b> | <b>10.757</b> | <b>2.271292</b> | <b>5401</b> | <b>28.865</b> | <b>15.535</b> | <b>2.588993</b> |
| 0.910496        | 2788        | 16.033        | 6.223         | 1.313705        | 4881        | 18.111        | 4.781         | 0.797299        |
| 0.55682         | 3973        | 9.7408        | 0.0692        | -0.01522        | 5643        | 9.4808        | 3.8492        | -0.64055        |
| 1.447012        | 3518        | 9.8067        | 0.0033        | -0.0013         | 4942        | 12.626        | 0.704         | -0.11654        |
| -0.07112        | 3253        | 4.6726        | 5.1374        | -1.08563        | 5028        | 4.6937        | 8.6363        | -1.43812        |
| -0.04851        | 3608        | 6.8182        | 2.9918        | -0.63247        | 7111        | 14.513        | 1.183         | 0.197846        |
| -0.39064        | 3263        | 7.2326        | 2.5774        | -0.54495        | 4821        | 7.4051        | 5.9249        | -0.98638        |
| -0.97113        | 3777        | 7.6516        | 2.1584        | -0.45646        | 5026        | 8.9534        | 4.3766        | -0.72842        |
| 1.879705        | 3080        | 11.688        | 1.878         | 0.396034        | 4827        | 11.394        | 1.936         | -0.3218         |

|                |             |               |               |                 |             |               |               |                 |
|----------------|-------------|---------------|---------------|-----------------|-------------|---------------|---------------|-----------------|
| 0.799072       | 3519        | 12.049        | 2.239         | 0.472278        | 4804        | 10.033        | 3.297         | -0.54855        |
| 1.583441       | 4883        | 8.417         | 1.393         | -0.29481        | 6442        | 18.24         | 4.91          | 0.818791        |
| -0.90243       | 3883        | 6.1293        | 3.6807        | -0.77797        | 4829        | 13.46         | 0.13          | 0.022409        |
| -0.40753       | 3314        | 4.4961        | 5.3139        | -1.12291        | 3646        | 10.066        | 3.264         | -0.54306        |
| -0.53037       | 2944        | 7.2011        | 2.6089        | -0.55161        | 4997        | 15.429        | 2.099         | 0.350458        |
| -0.3492        | 2679        | 11.273        | 1.463         | 0.308386        | 4989        | 17.398        | 4.068         | 0.678508        |
| -0.78841       | 4067        | 9.2943        | 0.5157        | -0.10952        | 4579        | 12.841        | 0.489         | -0.08072        |
| -1.13048       | 2226        | 9.1195        | 0.6905        | -0.14644        | 3995        | 9.7121        | 3.6179        | -0.60202        |
| -1.23085       | 3215        | 10.42         | 0.61          | 0.128231        | 5831        | 11.405        | 1.925         | -0.31997        |
| 0.024905       | 4483        | 9.2572        | 0.5528        | -0.11735        | 7243        | 18.956        | 5.626         | 0.938082        |
| -0.40675       | 3638        | 12.012        | 2.202         | 0.464464        | 5224        | 17.075        | 3.745         | 0.624694        |
| 0.327571       | 3436        | 10.332        | 0.522         | 0.109645        | 5534        | 22.804        | 9.474         | 1.579187        |
| -0.25455       | 2334        | 4.9272        | 4.8828        | -1.03186        | 4024        | 12.972        | 0.358         | -0.0589         |
| -1.41318       | 4080        | 2.3284        | 7.4816        | -1.58073        | 3851        | 2.3111        | 11.0189       | -1.83508        |
| -0.13593       | 3604        | 1.6926        | 8.1174        | -1.71501        | 4816        | 11.441        | 1.889         | -0.31397        |
| 0.13733        | 2689        | 8.7021        | 1.1079        | -0.23459        | 3941        | 13.118        | 0.212         | -0.03457        |
| -0.0059        | 5316        | 9.8006        | 0.0094        | -0.00259        | 5356        | 11.837        | 1.493         | -0.24799        |
| 0.632836       | 3102        | 18.246        | 8.436         | 1.781093        | 5179        | 19.637        | 6.307         | 1.051542        |
| -0.58987       | 3580        | 13.715        | 3.905         | 0.82414         | 5736        | 21.513        | 8.183         | 1.364097        |
| -0.66954       | 3799        | 9.1077        | 0.7023        | -0.14893        | 4766        | 11.687        | 1.643         | -0.27299        |
| -1.58436       | 2103        | 7.6082        | 2.2018        | -0.46563        | 3872        | 10.124        | 3.206         | -0.53339        |
| -1.41521       | 3885        | 8.2883        | 1.5217        | -0.32199        | 3852        | 8.5151        | 4.8149        | -0.80145        |
| 0.173137       | 4334        | 17.028        | 7.218         | 1.52385         | 5021        | 16.65         | 3.32          | 0.553886        |
| -1.70991       | 3156        | 6.0203        | 3.7897        | -0.80099        | 3917        | 8.0419        | 5.2881        | -0.88029        |
| <b>0.64904</b> | <b>3746</b> | <b>28.644</b> | <b>18.834</b> | <b>3.977166</b> | <b>5299</b> | <b>30.553</b> | <b>17.223</b> | <b>2.870226</b> |
| 0.066714       | 3476        | 18.383        | 8.573         | 1.810028        | 4716        | 17.875        | 4.545         | 0.75798         |
| -1.13078       | 3819        | 14.768        | 4.958         | 1.046535        | 6000        | 15.05         | 1.72          | 0.287314        |
| 0.077917       | 2755        | 12.232        | 2.422         | 0.510928        | 5525        | 13.538        | 0.208         | 0.035404        |
| -1.52081       | 3507        | 7.3282        | 2.4818        | -0.52476        | 6621        | 12.007        | 1.323         | -0.21967        |
| -1.33791       | 2529        | 27.956        | 18.146        | 3.83186         | 6666        | 14.101        | 0.771         | 0.129204        |
| -0.77781       | 3232        | 6.3428        | 3.4672        | -0.73288        | 5277        | 7.1821        | 6.1479        | -1.02353        |
| 0.682647       | 3180        | 13.774        | 3.964         | 0.836601        | 5411        | 15.746        | 2.416         | 0.403273        |
| -0.15253       | 3397        | 13.541        | 3.731         | 0.787391        | 6276        | 17.065        | 3.735         | 0.623028        |
| 0.32597        | 4232        | 2.2448        | 7.5652        | -1.59838        | 5014        | 7.7184        | 5.6116        | -0.93418        |
| 0.077317       | 3948        | 2.9889        | 6.8211        | -1.44123        | 4543        | 7.2199        | 6.1101        | -1.01724        |
| -0.4601        | 2794        | 2.2906        | 7.5194        | -1.58871        | 5077        | 9.0014        | 4.3286        | -0.72043        |
| 0.005901       | 3830        | 1.7232        | 8.0868        | -1.70855        | 4695        | 7.5825        | 5.7475        | -0.95683        |
| 0.78647        | 4475        | 4.3352        | 5.4748        | -1.15689        | 5350        | 13.514        | 0.184         | 0.031405        |
| 0.437794       | 4382        | 2.7157        | 7.0943        | -1.49893        | 6451        | 12.2          | 1.13          | -0.18752        |
| 0.28056        | 2436        | 3.4483        | 6.3617        | -1.3442         | 3787        | 4.0401        | 9.2899        | -1.54701        |
| -0.44178       | 3146        | 2.2568        | 7.5532        | -1.59585        | 5056        | 7.5752        | 5.7548        | -0.95804        |
| 1.561037       | 3910        | 6.0102        | 3.7998        | -0.80313        | 4759        | 12.671        | 0.659         | -0.10904        |
| -0.61751       | 3063        | 0.78355       | 9.02645       | -1.907          | 4018        | 5.7491        | 7.5809        | -1.26228        |
| -0.56884       | 4027        | 3.1785        | 6.6315        | -1.40118        | 4944        | 11.044        | 2.286         | -0.38011        |
| -0.06531       | 3296        | 4.7633        | 5.0467        | -1.06647        | 4879        | 12.257        | 1.073         | -0.17802        |
| 0.422791       | 2812        | 5.0498        | 4.7602        | -1.00596        | 5513        | 18.828        | 5.498         | 0.916756        |
| 0.796272       | 4418        | 4.6401        | 5.1699        | -1.09249        | 6396        | 8.9744        | 4.3556        | -0.72492        |

|          |      |        |        |          |      |        |        |          |
|----------|------|--------|--------|----------|------|--------|--------|----------|
| 2.143162 | 3619 | 6.7146 | 3.0954 | -0.65435 | 5560 | 11.906 | 1.424  | -0.2365  |
| 0.412789 | 4088 | 2.9599 | 6.8501 | -1.44735 | 6361 | 14.605 | 1.275  | 0.213174 |
| -0.31037 | 4747 | 4.9505 | 4.8595 | -1.02694 | 6880 | 11.032 | 2.298  | -0.38211 |
| 1.049326 | 3353 | 1.9684 | 7.8416 | -1.65676 | 6776 | 11.924 | 1.406  | -0.2335  |
| 0.172337 | 3090 | 5.0162 | 4.7938 | -1.01306 | 5789 | 14.994 | 1.664  | 0.277984 |
| 0.32597  | 3801 | 4.262  | 5.548  | -1.17235 | 5843 | 11.022 | 2.308  | -0.38378 |
| -0.75812 | 6366 | 6.8018 | 3.0082 | -0.63594 | 7636 | 7.6349 | 5.6951 | -0.9481  |
| 0.14133  | 3010 | 14.551 | 4.741  | 1.000704 | 5748 | 17.31  | 3.98   | 0.663847 |
| -0.08332 | 3425 | 7.7372 | 2.0728 | -0.43838 | 5473 | 13.009 | 0.321  | -0.05273 |
| 1.545433 | 4545 | 17.162 | 7.352  | 1.552151 | 6992 | 26.402 | 13.072 | 2.17864  |
| -0.09092 | 4183 | 11.977 | 2.167  | 0.457072 | 6198 | 13.02  | 0.31   | -0.0509  |
| -0.20174 | 4201 | 8.3313 | 1.4787 | -0.31291 | 6540 | 9.3884 | 3.9416 | -0.65595 |
| 2.189172 | 3174 | 18.557 | 8.747  | 1.846777 | 6498 | 15.99  | 2.66   | 0.443925 |
| 0.301965 | 3447 | 18.306 | 8.496  | 1.793766 | 4660 | 13.884 | 0.554  | 0.09305  |
| 0.059513 | 3471 | 15.356 | 5.546  | 1.170721 | 3700 | 8.7027 | 4.6273 | -0.77019 |
| 0.067515 | 4176 | 10.081 | 0.271  | 0.056634 | 4056 | 6.1391 | 7.1909 | -1.19731 |
| 0.819677 | 2274 | 13.632 | 3.822  | 0.80661  | 3716 | 13.186 | 0.144  | -0.02324 |
| -0.43239 | 3336 | 12.8   | 2.99   | 0.63089  | 4760 | 19.475 | 6.145  | 1.024551 |
| 1.178954 | 3581 | 15.945 | 6.135  | 1.295119 | 6425 | 20.28  | 6.95   | 1.15867  |
| 0.147732 | 3238 | 7.7517 | 2.0583 | -0.43532 | 5137 | 9.5386 | 3.7914 | -0.63092 |
| -0.49127 | 3118 | 9.2688 | 0.5412 | -0.1149  | 5664 | 6.7797 | 6.5503 | -1.09058 |
| -0.37734 | 3538 | 8.1402 | 1.6698 | -0.35327 | 5907 | 9.6157 | 3.7143 | -0.61808 |
| -1.14979 | 2569 | 8.0965 | 1.7135 | -0.3625  | 5488 | 9.2566 | 4.0734 | -0.67791 |
| 1.99433  | 5273 | 15.229 | 5.419  | 1.143899 | 7586 | 20.327 | 6.997  | 1.166501 |
| 1.029722 | 5037 | 16.855 | 7.045  | 1.487312 | 6886 | 25.632 | 12.302 | 2.050352 |
| -0.75926 | 3801 | 5.5775 | 4.2325 | -0.89451 | 4469 | 6.2878 | 7.0422 | -1.17253 |
| 0.726057 | 5353 | 9.434  | 0.376  | -0.08001 | 6080 | 18.783 | 5.453  | 0.909259 |
| 0.261356 | 2598 | 10.393 | 0.583  | 0.122529 | 4840 | 17.397 | 4.067  | 0.678341 |
| 0.564422 | 3659 | 13.501 | 3.691  | 0.778943 | 4530 | 16.093 | 2.763  | 0.461086 |
| 0.215947 | 4096 | 12.036 | 2.226  | 0.469533 | 5231 | 15.618 | 2.288  | 0.381947 |
| -1.09172 | 2696 | 6.8249 | 2.9851 | -0.63106 | 4035 | 6.6667 | 6.6633 | -1.1094  |
| 0.070715 | 3666 | 6.874  | 2.936  | -0.62069 | 6866 | 15.234 | 1.904  | 0.31797  |
| 2.222579 | 2846 | 15.601 | 5.791  | 1.222466 | 5108 | 22.475 | 9.145  | 1.524373 |
| 0.892492 | 2860 | 15.14  | 5.33   | 1.125102 | 3679 | 17.206 | 3.876  | 0.646519 |
| 1.041525 | 3527 | 10.462 | 0.652  | 0.137101 | 6715 | 20.447 | 7.117  | 1.186493 |
| 4.35864  | 2530 | 14.585 | 4.775  | 1.007885 | 4375 | 24.617 | 11.287 | 1.881246 |
| 1.426408 | 3652 | 11.473 | 1.663  | 0.350626 | 5272 | 21.491 | 8.161  | 1.360431 |
| 1.957122 | 2278 | 12.423 | 2.613  | 0.551267 | 6318 | 23.773 | 10.443 | 1.740629 |
| 1.139946 | 2202 | 5.2225 | 4.5875 | -0.96949 | 4487 | 16.849 | 3.519  | 0.587041 |
| 1.16075  | 2125 | 7.9059 | 1.9041 | -0.40275 | 4581 | 13.425 | 0.095  | 0.016577 |
| 0.071115 | 2311 | 8.7408 | 1.0692 | -0.22642 | 5955 | 11.335 | 1.995  | -0.33163 |
| 0.749662 | 3038 | 12.673 | 2.863  | 0.604068 | 6887 | 19.573 | 6.243  | 1.040879 |
| 0.617033 | 3456 | 16.175 | 6.365  | 1.343695 | 6565 | 18.096 | 4.766  | 0.7948   |
| 0.596829 | 2662 | 10.856 | 1.046  | 0.220315 | 6841 | 10.306 | 3.024  | -0.50307 |
| 0.427392 | 2353 | 6.5873 | 3.2227 | -0.68124 | 4834 | 9.4125 | 3.9175 | -0.65193 |
| 2.081749 | 3670 | 16.267 | 6.457  | 1.363126 | 5477 | 14.807 | 1.477  | 0.246829 |
| 1.523028 | 4863 | 20.543 | 10.733 | 2.266223 | 4932 | 12.53  | 0.8    | -0.13254 |



|                 |             |               |               |                 |             |               |               |                 |
|-----------------|-------------|---------------|---------------|-----------------|-------------|---------------|---------------|-----------------|
| -0.07692        | 3406        | 8.1033        | 1.7067        | -0.36106        | 5079        | 14.294        | 0.964         | 0.161359        |
| -0.19994        | 2770        | 4.4765        | 5.3335        | -1.12704        | 3721        | 6.853         | 6.477         | -1.07837        |
| 0.589427        | 4421        | 19.498        | 9.688         | 2.045518        | 6110        | 17.021        | 3.691         | 0.615697        |
| -1.44355        | 3610        | 12.216        | 2.406         | 0.507549        | 4986        | 9.627         | 3.703         | -0.6162         |
| -0.36856        | 3171        | 13.75         | 3.94          | 0.831532        | 5812        | 10.857        | 2.473         | -0.41127        |
| 1.166552        | 2848        | 14.888        | 5.078         | 1.071879        | 5862        | 9.1607        | 4.1693        | -0.69389        |
| <b>2.684879</b> | <b>3837</b> | <b>21.658</b> | <b>11.848</b> | <b>2.501713</b> | <b>5818</b> | <b>17.515</b> | <b>4.185</b>  | <b>0.698001</b> |
| 0.152933        | 2716        | 8.3211        | 1.4889        | -0.31506        | 5058        | 7.0384        | 6.2916        | -1.04748        |
| 2.239183        | 3124        | 12.612        | 2.802         | 0.591185        | 4843        | 20.979        | 7.649         | 1.275129        |
| 0.955706        | 3006        | 14.305        | 4.495         | 0.948749        | 4655        | 14.307        | 0.977         | 0.163525        |
| 0.733458        | 3000        | 15.2          | 5.39          | 1.137774        | 6162        | 24.197        | 10.867        | 1.811271        |
| <b>2.140361</b> | <b>3237</b> | <b>19.802</b> | <b>9.992</b>  | <b>2.109723</b> | <b>6670</b> | <b>31.409</b> | <b>18.079</b> | <b>3.012842</b> |
| -0.81588        | 2431        | 7.8157        | 1.9943        | -0.4218         | 6155        | 7.7335        | 5.5965        | -0.93167        |
| 0.136529        | 2902        | 11.061        | 1.251         | 0.263611        | 5101        | 11.253        | 2.077         | -0.34529        |
| -0.26616        | 2574        | 10.14         | 0.33          | 0.069095        | 5639        | 14.843        | 1.513         | 0.252826        |
| 0.403387        | 4171        | 15.008        | 5.198         | 1.097223        | 5714        | 15.453        | 2.123         | 0.354457        |
| 0.484604        | 3540        | 16.441        | 6.631         | 1.399875        | 6743        | 18.182        | 4.852         | 0.809128        |
| 1.906911        | 3303        | 16.561        | 6.751         | 1.425219        | 5346        | 15.32         | 1.99          | 0.332298        |
| -0.60769        | 3208        | 10.661        | 0.851         | 0.179131        | 5573        | 9.7075        | 3.6225        | -0.60279        |
| -1.15853        | 3468        | 15.946        | 6.136         | 1.29533         | 4888        | 5.8715        | 7.4585        | -1.24189        |
| -0.13713        | 3087        | 9.3618        | 0.4482        | -0.09526        | 3520        | 4.0341        | 9.2959        | -1.54801        |
| -1.04607        | 3532        | 16.195        | 6.385         | 1.347919        | 3839        | 4.4803        | 8.8497        | -1.47367        |
| -1.44609        | 1909        | 10.739        | 0.929         | 0.195604        | 4751        | 6.0408        | 7.2892        | -1.21368        |
| 0.328171        | 2303        | 15.979        | 6.169         | 1.3023          | 5089        | 10.886        | 2.444         | -0.40644        |
| -0.82034        | 1980        | 12.929        | 3.119         | 0.658135        | 2793        | 6.8385        | 6.4915        | -1.08078        |
| -0.36042        | 3453        | 8.1958        | 1.6142        | -0.34152        | 4443        | 6.257         | 7.073         | -1.17766        |
| 1.072931        | 2528        | 16.416        | 6.606         | 1.394595        | 5741        | 19.091        | 5.761         | 0.960574        |
| -0.83728        | 2774        | 14.78         | 4.97          | 1.049069        | 3940        | 6.802         | 6.528         | -1.08686        |
| 0.054912        | 2684        | 10.395        | 0.585         | 0.122951        | 3677        | 6.0919        | 7.2381        | -1.20517        |
| 0.931301        | 2535        | 22.288        | 12.478        | 2.63477         | 4727        | 23.588        | 10.258        | 1.709807        |
| -0.0081         | 2657        | 21.867        | 12.057        | 2.545854        | 5565        | 11.95         | 1.38          | -0.22917        |
| -0.90009        | 3367        | 11.494        | 1.684         | 0.355061        | 4619        | 16.172        | 2.842         | 0.474248        |
| -0.35148        | 3585        | 10.265        | 0.455         | 0.095495        | 5721        | 10.767        | 2.563         | -0.42626        |
| -0.17894        | 2951        | 12.911        | 3.101         | 0.654334        | 5459        | 6.3382        | 6.9918        | -1.16413        |
| -0.33595        | 2450        | 15.224        | 5.414         | 1.142843        | 5408        | 10.688        | 2.642         | -0.43943        |
| -0.0113         | 3089        | 19.1          | 9.29          | 1.96146         | 6177        | 12.239        | 1.091         | -0.18102        |
| 1.711069        | 2896        | 20.511        | 10.701        | 2.259465        | 5318        | 13.125        | 0.205         | -0.0334         |
| 0.425392        | 2240        | 9.9554        | 0.1454        | 0.030107        | 4126        | 5.6714        | 7.6586        | -1.27523        |
| -0.71579        | 3298        | 8.5506        | 1.2594        | -0.26659        | 4281        | 7.4982        | 5.8318        | -0.97087        |
|                 | 3491.5      | 9.81285       | 3.1992        |                 | 4379        | 13.3255       | 4.0555        |                 |
|                 |             |               | 9.5976        |                 |             |               | 12.1665       |                 |
|                 |             |               | 4.734816      |                 |             |               | 6.00214       |                 |
| 806             | 12.655      |               | 3453          | 21.952          |             |               |               |                 |
| 1606            | 10.834      |               | 1741          | 7.8116          |             |               |               |                 |
| 1293            | 2.5522      |               | 2828          | 7.9208          |             |               |               |                 |
| 1129            | 4.3401      |               | 1896          | 5.9072          |             |               |               |                 |
| 1208.5          | 7.595325    |               | 2479.5        | 10.8979         |             |               |               |                 |

|          |          |          |          |
|----------|----------|----------|----------|
| 333.4032 | 4.903024 | 807.2606 | 7.427171 |
| 2239     | 49.71    | 4348     | 50.851   |
| 3180     | 41.855   | 6411     | 61.816   |
| 3265     | 48.055   | 4353     | 47.232   |
| 2654     | 42.615   | 5596     | 59.936   |
| 2834.5   | 45.55875 | 5177     | 54.95875 |
|          | 3.909287 |          | 7.032571 |
|          | 11.72786 |          | 21.09771 |
|          | 14.70907 |          | 22.28151 |
|          | 26.43693 |          | 43.37922 |
|          | 37.96343 |          | 44.06085 |
|          | 0.696379 |          | 0.98453  |
|          | 0.303621 |          | 0.01547  |

|      |        |      |        |
|------|--------|------|--------|
| 515  | 14.175 | 733  | 7.5034 |
| 584  | 7.363  | 527  | 20.873 |
| 2308 | 12.348 | 5571 | 18.094 |
| 3090 | 8.0583 | 4734 | 7.7102 |
| 5893 | 13.117 | 5679 | 21.078 |
| 6704 | 6.071  | 5460 | 17.399 |

y

y

y

y

x      debris a

y

y

y





y

y

|                  |                               |                       | cell ct     | % inf         | AD            |
|------------------|-------------------------------|-----------------------|-------------|---------------|---------------|
| 50073 A02        | M-018749- WD repeat           | 146845 WDR16          | 3294        | 10.929        | 1.519         |
| <b>50073 A04</b> | <b>M-010964- solute carri</b> | <b>146802 SLC47A2</b> | <b>3993</b> | <b>32.206</b> | <b>22.796</b> |
| 50073 A05        | M-007137- tripartite r        | 140691 TRIM69         | 3866        | 7.2944        | 2.1156        |
| 50073 A06        | M-030801- hypothetic          | 146795 LOC146795      | 4448        | 6.9469        | 2.4631        |
| 50073 A07        | M-016526- chromosom           | 140699 C20orf132      | 4048        | 7.831         | 1.579         |
| 50073 A08        | M-018511- EF-hand ca          | 146779 EFCAB3         | 5080        | 5.1181        | 4.2919        |
| 50073 A09        | M-015241- sterile alph        | 140700 SAMD10         | 3921        | 5.8914        | 3.5186        |
| 50073 A10        | M-030838- dynein, axc         | 146754 DNAH2          | 4771        | 6.3718        | 3.0382        |
| 50073 A11        | M-015242- chromosom           | 140701 C20orf135      | 4401        | 13.156        | 3.746         |
| 50073 A12        | M-016417- chromosom           | 146723 C17orf77       | 4262        | 10.465        | 1.055         |
| 50073 A13        | M-018652- chromosom           | 140706 C20orf160      | 4200        | 10.81         | 1.4           |
| 50073 A14        | M-030816- hypothetic          | 146713 HRNBP3         | 3799        | 11.714        | 2.304         |
| 50073 A15        | M-021322- regulating :        | 140730 RIMS4          | 3918        | 3.9816        | 5.4284        |
| 50073 A16        | M-019318- UDP-GlcNA           | 146712 B3GNTL1        | 4938        | 12.13         | 2.72          |
| 50073 A17        | M-015257- chromosom           | 140731 C20orf86       | 4232        | 7.0888        | 2.3212        |
| 50073 A18        | M-015821- chromosom           | 146705 C17orf56       | 5437        | 15.431        | 6.021         |
| 50073 A19        | M-016807- sperm asso          | 140732 SPAG4L         | 2217        | 12.539        | 3.129         |
| 50073 A20        | M-018810- target of m         | 146691 TOM1L2         | 4942        | 13.638        | 4.228         |
| 50073 A21        | M-015258- chromosom           | 140733 C20orf133      | 5032        | 6.6574        | 2.7526        |
| 50073 A23        | M-019410- transmembr          | 140738 TMEM37         | 3534        | 4.2445        | 5.1655        |
| 50073 B02        | M-032206- HERV-FRD            | 405754 HERV-FRD       | 5575        | 8.7892        | 0.6208        |
| 50073 B04        | M-016525- hypothetic          | 149650 RP11-93B1      | 4543        | 4.7766        | 4.6334        |
| 50073 B05        | M-015818- coiled-coil         | 146849 CCDC42         | 5335        | 4.5361        | 4.8739        |
| 50073 B06        | M-016392- hypothetic          | 146268 FLJ31821       | 5664        | 12.112        | 2.702         |
| 50073 B07        | M-030841- chromosom           | 146850 C17orf38       | 5250        | 6.0571        | 3.3529        |
| 50073 B08        | M-016735- hypothetic          | 148697 FLJ30634       | 5004        | 4.6763        | 4.7337        |
| 50073 B09        | M-016398- outer dens          | 146852 ODF4           | 5731        | 9.9459        | 0.5359        |
| 50073 B10        | M-017378- CDC42 effe          | 148170 CDC42EP5       | 5388        | 8.1477        | 1.2623        |
| 50073 B11        | M-016053- chromosom           | 146853 C17orf50       | 5752        | 10.57         | 1.16          |
| 50073 B12        | M-024368- hypothetic          | 150084 LOC150084      | 5556        | 11.015        | 1.605         |
| 50073 B13        | M-015815- schlafen fa         | 146857 SLFN13         | 4685        | 9.5624        | 0.1524        |
| 50073 B14        | M-016527- chromosom           | 150082 C21orf13       | 5694        | 16.298        | 6.888         |
| 50073 B15        | M-016419- acyl-malon          | 146861 AMAC1          | 3848        | 7.9262        | 1.4838        |
| 50073 B16        | M-016165- chromosom           | 149992 C21orf99       | 5979        | 13.949        | 4.539         |
| 50073 B17        | M-017877- unc-45 hon          | 146862 UNC45B         | 5773        | 17.565        | 8.155         |
| 50073 B18        | M-015675- LSM14B, S           | 149986 LSM14B         | 6257        | 13.872        | 4.462         |
| 50073 B19        | M-030925- hypothetic          | 146880 MGC40489       | 6088        | 17.428        | 8.018         |
| 50073 B20        | M-009125- chromosom           | 149954 C20orf186      | 5161        | 16.063        | 6.653         |
| 50073 B21        | M-016059- CD300 mol           | 146894 CD300LG        | 5743        | 26.223        | 16.813        |
| 50073 B23        | M-010460- hypothetic          | 146909 LOC146909      | 6295        | 17.299        | 7.889         |
| 50073 C02        | M-015789- mannosyl (          | 146664 MGAT5B         | 5581        | 14.334        | 4.924         |
| 50073 C04        | M-016884- chromosom           | 146562 C16orf71       | 4342        | 11.515        | 2.105         |
| 50073 C05        | M-009081- ubiquitin-c         | 140739 UBE2F          | 4125        | 4.9697        | 4.4403        |
| 50073 C06        | M-018764- hypothetic          | 146556 MGC45438       | 6236        | 15.763        | 6.353         |
| 50073 C07        | M-018655- neurensin :         | 140767 NRSN1          | 4382        | 6.1844        | 3.2256        |
| 50073 C08        | M-005879- protease, s         | 146547 PRSS36         | 5774        | 9.0578        | 0.3522        |

|           |                         |                  |      |        |        |
|-----------|-------------------------|------------------|------|--------|--------|
| 50073 C09 | M-016465- Smith-Mag     | 140771 SMCR5     | 4969 | 9.8611 | 0.4511 |
| 50073 C10 | M-007139- zinc finger   | 146542 ZNF688    | 4859 | 6.9356 | 2.4744 |
| 50073 C11 | M-017373- Smith-Mag     | 140775 SMCR8     | 3984 | 8.3584 | 1.0516 |
| 50073 C12 | M-018331- zinc finger   | 146540 ZNF785    | 3627 | 13.758 | 4.348  |
| 50073 C13 | M-013264- ribosomal     | 140801 RPL10L    | 3786 | 20.919 | 11.509 |
| 50073 C14 | M-022800- similar to h  | 146489 LOC146489 | 6269 | 18.089 | 8.679  |
| 50073 C15 | M-015267- keratin 72    | 140807 KRT72     | 3504 | 14.526 | 5.116  |
| 50073 C16 | M-030697- hypothetic    | 146481 LOC146481 | 3691 | 22.108 | 12.698 |
| 50073 C17 | M-015263- sulfiredoxin  | 140809 SRXN1     | 3236 | 5.8096 | 3.6004 |
| 50073 C18 | M-008029- transmembrane | 146456 TMED6     | 4938 | 14.905 | 5.495  |
| 50073 C19 | M-015268- chromosom     | 140823 C20orf52  | 4265 | 13.411 | 4.001  |
| 50073 C20 | M-030676- hypothetic    | 146443 LOC146443 | 4627 | 10.979 | 1.569  |
| 50073 C21 | M-015269- neuralized    | 140825 NEURL2    | 3949 | 15.447 | 6.037  |
| 50073 C23 | M-018137- brix domain   | 140826 BXDC1P    | 4622 | 22.22  | 12.81  |
| 50073 D02 | M-015188- COMM domain   | 149951 COMMD7    | 3551 | 9.434  | 0.024  |
| 50073 D04 | M-018767- chromosom     | 149840 C20orf196 | 4216 | 10.223 | 0.813  |
| 50073 D05 | M-017736- RUN domain    | 146923 RUNDC1    | 3483 | 6.7758 | 2.6342 |
| 50073 D06 | M-018042- hypothetic    | 149836 MGC35023  | 3357 | 3.2767 | 6.1333 |
| 50073 D07 | M-016420- essential m   | 146956 EME1      | 5297 | 3.4925 | 5.9175 |
| 50073 D08 | M-018306- prion prote   | 149830 PRNT      | 4169 | 8.5392 | 0.8708 |
| 50073 D09 | M-030945- hypothetic    | 147004 LOC147004 | 4346 | 5.0391 | 4.3709 |
| 50073 D10 | M-017408- WAP four-c    | 149708 WFDC5     | 5303 | 9.3155 | 0.0945 |
| 50073 D11 | M-016421- chromosom     | 147007 C17orf32  | 3124 | 7.8425 | 1.5675 |
| 50073 D12 | M-018028- family with   | 149699 FAM112A   | 3202 | 5.4341 | 3.9759 |
| 50073 D13 | M-016422- proline-rich  | 147011 PROCA1    | 3497 | 11.925 | 2.515  |
| 50073 D14 | M-031303- hypothetic    | 149692 LOC149692 | 4018 | 10.229 | 0.819  |
| 50073 D15 | M-008777- dehydroge     | 147015 DHRS13    | 5210 | 8.5797 | 0.8303 |
| 50073 D16 | M-017780- adipogenin    | 149685 ADIG      | 2841 | 7.5326 | 1.8774 |
| 50073 D17 | M-023046- potassium     | 147040 KCTD11    | 3322 | 4.2745 | 5.1355 |
| 50073 D18 | M-015906- family with   | 149647 FAM71A    | 5989 | 12.389 | 2.979  |
| 50073 D19 | M-030899- hypothetic    | 147080 LOC147080 | 5147 | 7.2081 | 2.2019 |
| 50073 D20 | M-016524- pyrin and F   | 149628 PYHIN1    | 3087 | 13.022 | 3.612  |
| 50073 D21 | M-016423- chromosom     | 147081 C17orf69  | 6396 | 20.169 | 10.759 |
| 50073 D23 | M-030882- hypothetic    | 147093 LOC147093 | 2861 | 13.072 | 3.662  |
| 50073 E02 | M-016761- zinc finger   | 146434 ZNF597    | 6227 | 22.981 | 13.571 |
| 50073 E04 | M-016777- chromosom     | 146433 C16orf77  | 5649 | 16.268 | 6.858  |
| 50073 E05 | M-015271- zinc finger,  | 140831 ZSWIM3    | 4796 | 10.53  | 1.12   |
| 50073 E06 | M-003985- GSG1-like     | 146395 GSG1L     | 5807 | 19.649 | 10.239 |
| 50073 E07 | M-013266- WAP four-c    | 140832 WFDC10A   | 5457 | 7.495  | 1.915  |
| 50073 E08 | M-003995- hypothetic    | 146378 FLJ25404  | 4312 | 12.43  | 3.02   |
| 50073 E09 | M-018231- chromosom     | 140836 C20orf179 | 4390 | 11.002 | 1.592  |
| 50073 E10 | M-018990- hypothetic    | 146336 FLJ32252  | 4875 | 13.415 | 4.005  |
| 50073 E11 | M-017258- defensin, b   | 140850 DEFB127   | 4147 | 8.7051 | 0.7049 |
| 50073 E12 | M-016797- F-box and l   | 146330 FBXL16    | 3908 | 10.415 | 1.005  |
| 50073 E13 | M-010375- chromosom     | 140856 C20orf79  | 3529 | 13.262 | 3.852  |
| 50073 E14 | M-016050- similar to h  | 146325 LOC146325 | 4085 | 8.2252 | 1.1848 |
| 50073 E15 | M-024255- chromosom     | 140862 C20orf82  | 4830 | 12.712 | 3.302  |

|                  |                              |                    |             |               |               |
|------------------|------------------------------|--------------------|-------------|---------------|---------------|
| 50073 E16        | M-030777- ring finger        | 146310 RNF151      | 3684        | 12.025        | 2.615         |
| 50073 E17        | M-013695- WAP four-c         | 140870 WFDC6       | 2980        | 5.2013        | 4.2087        |
| <b>50073 E18</b> | <b>M-015833- tektin 5</b>    | <b>146279 TEK5</b> | <b>5383</b> | <b>22.608</b> | <b>13.198</b> |
| 50073 E19        | M-015275- chromoson          | 140873 C20orf173   | 4810        | 8.316         | 1.094         |
| <b>50073 E20</b> | <b>M-022571- brain expre</b> | <b>146227 BEAN</b> | <b>4185</b> | <b>23.441</b> | <b>14.031</b> |
| 50073 E21        | M-015276- chromoson          | 140876 C20orf175   | 3907        | 4.5047        | 4.9053        |
| 50073 E23        | M-017530- cystatin 11        | 140880 CST11       | 5543        | 10.554        | 1.144         |
| 50073 F02        | M-021939- ring finger        | 149603 RNF187      | 4474        | 5.7443        | 3.6657        |
| 50073 F04        | M-018368- chromoson          | 149563 C1orf64     | 5145        | 7.1914        | 2.2186        |
| 50073 F05        | M-018341- notum pec          | 147111 NOTUM       | 4451        | 5.2797        | 4.1303        |
| 50073 F06        | M-015707- chromoson          | 149499 C1orf92     | 2980        | 1.2752        | 8.1348        |
| 50073 F07        | M-023295- hypothetic         | 147172 DKFZp667M   | 4116        | 2.551         | 6.859         |
| 50073 F08        | M-016956- coiled-coil        | 149483 CCDC17      | 4774        | 9.0071        | 0.4029        |
| 50073 F09        | M-017591- WAS/WASL           | 147179 WIPF2       | 3410        | 3.4604        | 5.9496        |
| 50073 F10        | M-027467- hypothetic         | 149478 LOC149478   | 4599        | 6.3275        | 3.0825        |
| 50073 F11        | M-018766- keratin 25         | 147183 KRT25       | 4986        | 11.051        | 1.641         |
| 50073 F12        | M-016955- coiled-coil        | 149473 CCDC24      | 3465        | 9.6104        | 0.2004        |
| 50073 F13        | M-015962- transmemk          | 147184 TMEM99      | 3650        | 3.7808        | 5.6292        |
| 50073 F14        | M-018666- chromoson          | 149469 C1orf84     | 4005        | 5.6429        | 3.7671        |
| 50073 F15        | M-015629- secretoglo         | 147199 SCGB1C1     | 4067        | 4.3521        | 5.0579        |
| 50073 F16        | M-018640- chromoson          | 149466 C1orf210    | 3376        | 7.8495        | 1.5605        |
| 50073 F17        | M-016885- START dom          | 147323 STARD6      | 3179        | 4.2152        | 5.1948        |
| 50073 F18        | M-016954- WD repeat          | 149465 WDR65       | 5029        | 12.965        | 3.555         |
| 50073 F19        | M-015948- chromoson          | 147339 C18orf25    | 5070        | 9.5069        | 0.0969        |
| 50073 F20        | M-016233- claudin 19         | 149461 CLDN19      | 4992        | 7.3117        | 2.0983        |
| 50073 F21        | M-015579- chromoson          | 147341 C18orf23    | 5609        | 12.319        | 2.909         |
| 50073 F23        | M-023544- collagen ar        | 147372 CCBE1       | 2233        | 5.1948        | 4.2152        |
| 50073 G02        | M-010754- CKLF-like IV       | 146225 CMTM2       | 6017        | 6.5481        | 2.8619        |
| 50073 G04        | M-010753- CKLF-like IV       | 146223 CMTM4       | 6462        | 10.09         | 0.68          |
| 50073 G05        | M-013461- defensin, b        | 140881 DEFB129     | 5187        | 7.3646        | 2.0454        |
| 50073 G06        | M-030635- potassium          | 146212 KCTD19      | 5653        | 4.9354        | 4.4746        |
| 50073 G07        | M-007138- suppressor         | 140883 SUHW2       | 5178        | 6.9911        | 2.4189        |
| 50073 G08        | M-022592- RGD, leucir        | 146206 RLTPR       | 5870        | 9.029         | 0.381         |
| 50073 G09        | M-015277- poly(A) bin        | 140886 PABPC5      | 4101        | 14.24         | 4.83          |
| 50073 G10        | M-022578- zinc finger        | 146198 ZFP90       | 5222        | 5.8407        | 3.5693        |
| 50073 G11        | M-016865- splicing fac       | 140890 SFRS12      | 3904        | 9.4006        | 0.0094        |
| 50073 G12        | M-030605- hypothetic         | 146177 LOC146177   | 4180        | 10.622        | 1.212         |
| 50073 G13        | M-015278- chromoson          | 140893 C20orf151   | 3528        | 6.4909        | 2.9191        |
| 50073 G14        | M-018502- chromoson          | 146174 C16orf52    | 4477        | 12.799        | 3.389         |
| 50073 G15        | M-015279- chromoson          | 140894 C20orf152   | 4536        | 7.7822        | 1.6278        |
| 50073 G16        | M-018763- zinc finger        | 146050 ZSCAN29     | 4378        | 6.7839        | 2.6261        |
| 50073 G17        | M-018256- R3H domai          | 140902 R3HDML      | 3340        | 3.6527        | 5.7573        |
| 50073 G18        | M-016754- transmemk          | 145978 TMEM83      | 4502        | 5.3754        | 4.0346        |
| 50073 G19        | M-017598- chromoson          | 140947 C5orf20     | 4257        | 4.7921        | 4.6179        |
| 50073 G20        | M-015692- neuregulin         | 145957 NRG4        | 5292        | 5.0454        | 4.3646        |
| 50073 G21        | M-015287- mindbomb           | 142678 MIB2        | 5171        | 8.7024        | 0.7076        |
| 50073 G23        | M-007536- solute carri       | 142680 SLC34A3     | 5227        | 5.6629        | 3.7471        |

|           |                        |                  |      |        |        |
|-----------|------------------------|------------------|------|--------|--------|
| 50073 H02 | M-015353- BCL2/aden    | 149428 BNIPL     | 5231 | 2.2175 | 7.1925 |
| 50073 H04 | M-016953- chromoson    | 149421 C1orf215  | 5618 | 6.3546 | 3.0554 |
| 50073 H05 | M-018996- cerebellin 2 | 147381 CBLN2     | 4990 | 14.729 | 5.319  |
| 50073 H06 | M-018001- exocyst cor  | 149371 EXOC8     | 4246 | 3.7683 | 5.6417 |
| 50073 H07 | M-031039- mitochond    | 147407 MCART2    | 3054 | 7.9895 | 1.4205 |
| 50073 H08 | M-027614- hypothetic   | 149351 LOC149351 | 4420 | 4.4118 | 4.9982 |
| 50073 H09 | M-017803- desmogleir   | 147409 DSG4      | 4200 | 6.1905 | 3.2195 |
| 50073 H10 | M-022094- transmemk    | 149345 TMEM58    | 4816 | 13.642 | 4.232  |
| 50073 H11 | M-015580- chromoson    | 147429 C18orf16  | 3193 | 4.5412 | 4.8688 |
| 50073 H12 | M-016951- mannosida    | 149175 MANEAL    | 3679 | 3.0987 | 6.3113 |
| 50073 H13 | M-018512- ankyrin rep  | 147463 ANKRD29   | 2623 | 2.9356 | 6.4744 |
| 50073 H14 | M-027627- hypothetic   | 149134 LOC149134 | 2831 | 7.8064 | 1.6036 |
| 50073 H15 | M-016399- adenomatc    | 147495 APCDD1    | 2994 | 4.1082 | 5.3018 |
| 50073 H16 | M-016950- cornichon l  | 149111 CNIH3     | 4396 | 7.2111 | 2.1989 |
| 50073 H17 | M-023794- hypothetic   | 147645 LOC147645 | 3962 | 15.598 | 6.188  |
| 50073 H18 | M-016740- DC-STAMP     | 149095 DCST1     | 5373 | 10.702 | 1.292  |
| 50073 H19 | M-023796- hypothetic   | 147646 LOC147646 | 3532 | 15.657 | 6.247  |
| 50073 H20 | M-021899- hypothetic   | 149086 LOC149086 | 4833 | 6.1039 | 3.3061 |
| 50073 H21 | M-023802- hypothetic   | 147650 LOC147650 | 4577 | 5.9646 | 3.4454 |
| 50073 H23 | M-015806- zinc finger  | 147657 ZNF480    | 4565 | 11.961 | 2.551  |
| 50073 I02 | M-018499- spermatog    | 145946 SPATA8    | 4591 | 6.9266 | 2.4834 |
| 50073 I04 | M-016378- transmemk    | 145942 TMC05     | 3741 | 8.0727 | 1.3373 |
| 50073 I05 | M-008590- intelectin 2 | 142683 ITLN2     | 5035 | 10.884 | 1.474  |
| 50073 I06 | M-022324- mesoderm     | 145873 MESP2     | 6326 | 15.729 | 6.319  |
| 50073 I07 | M-031158- ankyrin rep  | 142685 ASB15     | 3835 | 9.5176 | 0.1076 |
| 50073 I08 | M-019125- hyaluronar   | 145864 HAPLN3    | 4166 | 5.8809 | 3.5291 |
| 50073 I09 | M-013205- ankyrin rep  | 142686 ASB14     | 4921 | 11.38  | 1.97   |
| 50073 I10 | M-015930- chromoson    | 145858 C15orf32  | 4121 | 7.5952 | 1.8148 |
| 50073 I11 | M-013180- ankyrin rep  | 142689 ASB12     | 4566 | 13.382 | 3.972  |
| 50073 I12 | M-030388- hypothetic   | 145845 LOC145845 | 4906 | 15.226 | 5.816  |
| 50073 I13 | M-029647- chromoson    | 142827 C10orf129 | 3461 | 8.4658 | 0.9442 |
| 50073 I14 | M-030417- hypothetic   | 145837 LOC145837 | 4179 | 13.544 | 4.134  |
| 50073 I15 | M-015900- sterile alph | 142891 SAMD8     | 3515 | 4.5804 | 4.8296 |
| 50073 I16 | M-030497- hypothetic   | 145820 LOC145820 | 4580 | 9.5633 | 0.1533 |
| 50073 I17 | M-015476- cofilin pseu | 142913 CFLP1     | 3383 | 10.73  | 1.32   |
| 50073 I18 | M-030513- hypothetic   | 145814 LOC145814 | 4584 | 8.7696 | 0.6404 |
| 50073 I19 | M-016391- TruB pseud   | 142940 TRUB1     | 4057 | 14.814 | 5.404  |
| 50073 I20 | M-022244- unc-13 hon   | 145790 UNC13C    | 4054 | 9.7928 | 0.3828 |
| 50073 I21 | M-008487- membrane     | 143098 MPP7      | 4675 | 9.0481 | 0.3619 |
| 50073 I23 | M-015451- hypothetic   | 143153 FLJ31958  | 4287 | 8.5374 | 0.8726 |
| 50073 J02 | M-016739- FLJ25476 p   | 149076 FLJ25476  | 6520 | 12.239 | 2.829  |
| 50073 J04 | M-021878- ring finger  | 149041 RC3H1     | 6888 | 8.2172 | 1.1928 |
| 50073 J05 | M-015581- zinc finger  | 147660 ZNF578    | 6278 | 12.01  | 2.6    |
| 50073 J06 | M-027496- KIAA1245     | 149013 KIAA1245  | 5512 | 9.0167 | 0.3933 |
| 50073 J07 | M-015582- FLJ32214 p   | 147664 FLJ32214  | 4815 | 15.223 | 5.813  |
| 50073 J08 | M-016995- GLIS family  | 148979 GLIS1     | 4345 | 9.4822 | 0.0722 |
| 50073 J09 | M-023826- hypothetic   | 147670 LOC147670 | 3632 | 9.4163 | 0.0063 |

|           |                        |                  |      |        |        |
|-----------|------------------------|------------------|------|--------|--------|
| 50073 J10 | M-016073- MOB1, Mp     | 148932 MOBKL2C   | 4105 | 11.352 | 1.942  |
| 50073 J11 | M-016200- chromosom    | 147685 C1orf18   | 3413 | 9.8447 | 0.4347 |
| 50073 J12 | M-018573- kinocilin    | 148930 L5        | 4049 | 12.176 | 2.766  |
| 50073 J13 | M-023835- zinc finger  | 147686 ZNF418    | 3370 | 10.059 | 0.649  |
| 50073 J14 | M-031726- chromosom    | 148898 C1orf213  | 4107 | 5.6245 | 3.7855 |
| 50073 J15 | M-016201- zinc finger  | 147687 ZNF417    | 3926 | 8.4819 | 0.9281 |
| 50073 J16 | M-016738- coiled-coil  | 148870 CCDC27    | 4428 | 9.9593 | 0.5493 |
| 50073 J17 | M-016400- zinc finger  | 147694 ZNF548    | 3251 | 6.4596 | 2.9504 |
| 50073 J18 | M-007528- solute carri | 148867 SLC30A7   | 5036 | 17.752 | 8.342  |
| 50073 J19 | M-009006- hypothetic   | 147699 FLJ40125  | 4085 | 8.8862 | 0.5238 |
| 50073 J20 | M-005106- chromosom    | 148823 C1orf150  | 4226 | 8.6133 | 0.7967 |
| 50073 J21 | M-018514- LY6/PLAUR    | 147719 LYPD4     | 4696 | 6.8569 | 2.5531 |
| 50073 J23 | M-027352- hypothetic   | 147727 LOC147727 | 4586 | 8.3515 | 1.0585 |
| 50073 K02 | M-022251- hypothetic   | 145783 LOC145783 | 5569 | 4.4532 | 4.9568 |
| 50073 K04 | M-016361- GRINL1A cc   | 145781 Gcom1     | 5035 | 6.1569 | 3.2531 |
| 50073 K05 | M-008854- FERM and I   | 143162 FRMPD2    | 5963 | 9.8105 | 0.4005 |
| 50073 K06 | M-016386- family with  | 145773 FAM81A    | 5283 | 6.2465 | 3.1635 |
| 50073 K07 | M-016716- vesicle trar | 143187 VT11A     | 4465 | 2.6204 | 6.7896 |
| 50073 K08 | M-030516- hypothetic   | 145757 LOC145757 | 3466 | 5.049  | 4.361  |
| 50073 K09 | M-029659- hypothetic   | 143188 LOC143188 | 4808 | 9.505  | 0.095  |
| 50073 K10 | M-016597- LysM, puta   | 145748 LYSMD4    | 3458 | 5.8415 | 3.5685 |
| 50073 K11 | M-016591- DPY30 dom    | 143241 DYDC1     | 3906 | 9.319  | 0.091  |
| 50073 K12 | M-032034- nuclear loc  | 145741 NLF1      | 2933 | 7.3304 | 2.0796 |
| 50073 K13 | M-007198- HECT doma    | 143279 HECTD2    | 3376 | 5.8649 | 3.5451 |
| 50073 K14 | M-016753- chromosom    | 145645 C15orf43  | 2934 | 6.2713 | 3.1387 |
| 50073 K15 | M-018330- fibroblast g | 143282 FGFBP3    | 3649 | 3.3434 | 6.0666 |
| 50073 K16 | M-018762- leucine rich | 145581 LRFN5     | 4404 | 10.672 | 1.262  |
| 50073 K17 | M-015704- chromosom    | 143379 C10orf82  | 2927 | 4.8172 | 4.5928 |
| 50073 K18 | M-021990- tetratricop  | 145567 TTC7B     | 3295 | 5.0379 | 4.3721 |
| 50073 K19 | M-016305- chromosom    | 143384 C10orf46  | 4563 | 14.07  | 4.66   |
| 50073 K20 | M-019407- magnesiurr   | 145553 MDP-1     | 4943 | 8.1934 | 1.2166 |
| 50073 K21 | M-018003- synaptotag   | 143425 SYT9      | 4121 | 6.843  | 2.567  |
| 50073 K23 | M-017778- low density  | 143458 LDLRAD3   | 3340 | 4.2216 | 5.1884 |
| 50073 L02 | M-016737- hypothetic   | 148811 FLJ32569  | 6240 | 7.9167 | 1.4933 |
| 50073 L04 | M-018560- major facili | 148808 MFSD4     | 5328 | 6.3626 | 3.0474 |
| 50073 L05 | M-016202- zinc finger  | 147741 ZNF560    | 5385 | 11.978 | 2.568  |
| 50073 L06 | M-027544- hypothetic   | 148756 LOC148756 | 3490 | 5.8453 | 3.5647 |
| 50073 L07 | M-016866- MDAC1        | 147744 MDAC1     | 5464 | 8.071  | 1.339  |
| 50073 L08 | M-018554- chromosom    | 148753 C1orf76   | 4288 | 6.0634 | 3.3466 |
| 50073 L09 | M-015801- transmemk    | 147798 TMC4      | 4649 | 10.368 | 0.958  |
| 50073 L10 | M-015977- ankyrin rep  | 148741 ANKRD35   | 5751 | 9.6853 | 0.2753 |
| 50073 L11 | M-007140- zinc finger  | 147807 ZNF524    | 3294 | 7.6199 | 1.7901 |
| 50073 L12 | M-018751- hemochror    | 148738 HFE2      | 3930 | 17.761 | 8.351  |
| 50073 L13 | M-031933- zinc finger  | 147808 ZNF784    | 3398 | 10.653 | 1.243  |
| 50073 L14 | M-018535- chromosom    | 148646 C1orf188  | 3561 | 4.9424 | 4.4676 |
| 50073 L15 | M-015954- zinc finger  | 147837 ZNF563    | 2535 | 3.0375 | 6.3725 |
| 50073 L16 | M-015655- chromosom    | 148645 C1orf211  | 4192 | 16.913 | 7.503  |

|                  |                               |                         |             |               |               |
|------------------|-------------------------------|-------------------------|-------------|---------------|---------------|
| 50073 L17        | M-018711- SPC24, ND           | 147841 SPC24            | 3466        | 14.974        | 5.564         |
| 50073 L18        | M-018534- solute carri        | 148641 SLC35F3          | 4047        | 10.378        | 0.968         |
| 50073 L19        | M-015777- hypothetic          | 147872 FLJ32658         | 4922        | 20.093        | 10.683        |
| 50073 L20        | M-008998- ubiquitin-c         | 148581 UBE2U            | 4553        | 16.824        | 7.414         |
| 50073 L21        | M-015690- dapper, an          | 147906 DACT3            | 5095        | 8.106         | 1.304         |
| 50073 L23        | M-017983- sine oculis         | 147912 SIX5             | 5288        | 11.517        | 2.107         |
| 50073 M02        | M-018971- thrombosp           | 145501 THSD3            | 4532        | 6.09          | 3.32          |
| 50073 M04        | M-019320- chromoson           | 145497 C14orf166t       | 5491        | 6.4287        | 2.9813        |
| 50073 M05        | M-015714- proteasom           | 143471 PSMA8            | 5172        | 12.336        | 2.926         |
| 50073 M06        | M-016298- chromoson           | 145483 C14orf44         | 5715        | 15.958        | 6.548         |
| 50073 M07        | M-015874- chromoson           | 143501 C11orf40         | 5565        | 13.729        | 4.319         |
| 50073 M08        | M-008320- zinc bindin         | 145482 ZADH1            | 4239        | 15.9          | 6.49          |
| 50073 M09        | M-029916- X-ray radia         | 143570 XRRA1            | 5020        | 8.1673        | 1.2427        |
| 50073 M10        | M-019149- abhydrolas          | 145447 ABHD12B          | 4251        | 16.208        | 6.798         |
| 50073 M11        | M-016109- ubiquilin-lil       | 143630 UBQLNL           | 4449        | 10.811        | 1.401         |
| 50073 M12        | M-007563- solute carri        | 145389 SLC38A6          | 3337        | 16.332        | 6.922         |
| 50073 M13        | M-015614- mucin 15, c         | 143662 MUC15            | 3436        | 7.6542        | 1.7558        |
| 50073 M14        | M-016882- chromoson           | 145376 C14orf50         | 3256        | 12.009        | 2.599         |
| 50073 M15        | M-015721- family with         | 143684 FAM76B           | 3905        | 18.592        | 9.182         |
| 50073 M16        | M-017631- proline rich        | 145270 PRIMA1           | 3927        | 14.77         | 5.36          |
| 50073 M17        | M-018289- sestrin 3           | 143686 SESN3            | 3444        | 8.5656        | 0.8444        |
| <b>50073 M18</b> | <b>M-008739- serpin pept</b>  | <b>145264 SERPINA12</b> | <b>4474</b> | <b>22.776</b> | <b>13.366</b> |
| 50073 M19        | M-004644- piwi-like 4         | 143689 PIWIL4           | 4158        | 15.801        | 6.391         |
| 50073 M20        | M-019261- goosecoid           | 145258 GSC              | 4807        | 10.838        | 1.428         |
| 50073 M21        | M-026507- hypothetic          | 143872 FLJ32810         | 4580        | 10.284        | 0.874         |
| 50073 M23        | M-016974- kelch repea         | 143879 KBTBD3           | 5323        | 11.215        | 1.805         |
| 50073 N02        | M-016713- neuroblast          | 148545 NBPF4            | 2452        | 1.6313        | 7.7787        |
| 50073 N04        | M-016712- transmemk           | 148534 TMEM56           | 5385        | 9.7493        | 0.3393        |
| 50073 N05        | M-016766- zinc finger         | 147923 ZNF420           | 6233        | 12.354        | 2.944         |
| 50073 N06        | M-018742- chromoson           | 148523 C1orf51          | 5810        | 15.06         | 5.65          |
| 50073 N07        | M-016203- zinc finger         | 147929 ZNF565           | 6148        | 9.5316        | 0.1216        |
| 50073 N08        | M-016306- PHD finger          | 148479 PHF13            | 3833        | 5.844         | 3.566         |
| 50073 N09        | M-015351- NLR family,         | 147945 NLRP4            | 3895        | 5.3402        | 4.0698        |
| 50073 N10        | M-021428- chromoson           | 148423 C1orf52          | 4678        | 9.4271        | 0.0171        |
| 50073 N11        | M-019316- zinc finger         | 147947 ZNF542           | 3951        | 7.8714        | 1.5386        |
| <b>50073 N12</b> | <b>M-021615- sterile alph</b> | <b>148418 SAMD13</b>    | <b>4152</b> | <b>29.552</b> | <b>20.142</b> |
| 50073 N13        | M-015751- zinc finger         | 147948 ZNF582           | 3775        | 10.967        | 1.557         |
| 50073 N14        | M-027670- hypothetic          | 148413 LOC148413        | 4621        | 10.604        | 1.194         |
| 50073 N15        | M-016204- zinc finger         | 147949 ZNF583           | 3029        | 12.446        | 3.036         |
| 50073 N16        | M-016711- sterile alph        | 148398 SAMD11           | 4494        | 11.682        | 2.272         |
| 50073 N17        | M-021329- family with         | 147965 FAM98C           | 2449        | 19.232        | 9.822         |
| 50073 N18        | M-015709- chromoson           | 148362 C1orf58          | 4580        | 16.07         | 6.66          |
| 50073 N19        | M-005802- calpain 12          | 147968 CAPN12           | 3403        | 19.835        | 10.425        |
| 50073 N20        | M-018529- chromoson           | 148345 C1orf127         | 4742        | 13.686        | 4.276         |
| 50073 N21        | M-031082- dpy-19-like         | 147991 DPY19L3          | 4288        | 9.5616        | 0.1516        |
| 50073 N23        | M-016205- tetratricop         | 148014 TTC9B            | 3231        | 6.9328        | 2.4772        |
| 50073 O02        | M-008319- retinol deh         | 145226 RDH12            | 3951        | 9.3141        | 0.0959        |



|           |                               |        |            |        |          |          |
|-----------|-------------------------------|--------|------------|--------|----------|----------|
| 50073 O04 | M-030335- hypothetical        | 145216 | LOC145216  | 3211   | 17.533   | 8.123    |
| 50073 O05 | M-016672- CWF19-like          | 143884 | CWF19L2    | 3514   | 13.005   | 3.595    |
| 50073 O06 | M-022004- chromosom           | 145200 | C14orf72   | 3265   | 9.0352   | 0.3748   |
| 50073 O07 | M-015652- KDEL (Lys- <i>f</i> | 143888 | KDELC2     | 3721   | 11.045   | 1.635    |
| 50073 O08 | M-019319- beta 1,3-ga         | 145173 | B3GALTL    | 4053   | 11.103   | 1.693    |
| 50073 O09 | M-018470- layilin             | 143903 | LAYN       | 3056   | 12.467   | 3.057    |
| 50073 O10 | M-016033- family with         | 145165 | FAM10A4    | 3685   | 5.2917   | 4.1183   |
| 50073 O11 | M-026589- hypothetical        | 144097 | LOC144097  | 3248   | 16.502   | 7.092    |
| 50073 O12 | M-021705- heterogene          | 144983 | RP11-78J21 | 3934   | 13.447   | 4.037    |
| 50073 O13 | M-018008- pleckstrin f        | 144100 | PLEKHA7    | 3023   | 8.0715   | 1.3385   |
| 50073 O14 | M-021584- hypothetical        | 144920 | LOC144920  | 2449   | 20.008   | 10.598   |
| 50073 O15 | M-016032- family with         | 144106 | FAM10A5    | 4613   | 19.033   | 9.623    |
| 50073 O16 | M-015653- chromosom           | 144811 | C13orf31   | 3538   | 17.467   | 8.057    |
| 50073 O17 | M-026785- SPT2, Supp          | 144108 | SPTY2D1    | 4990   | 14.469   | 5.059    |
| 50073 O18 | M-018966- chromosom           | 144809 | C13orf30   | 4587   | 14.912   | 5.502    |
| 50073 O19 | M-016796- transmembr          | 144110 | TMEM86A    | 5786   | 8.3477   | 1.0623   |
| 50073 O20 | M-030181- hypothetical        | 144776 | LOC144776  | 3142   | 5.2514   | 4.1586   |
| 50073 O21 | M-015858- dynein hea          | 144132 | DNHD1      | 5707   | 14.876   | 5.466    |
| 50073 O23 | M-016677- prickly hon         | 144165 | PRICKLE1   | 4293   | 11.857   | 2.447    |
| 50073 P02 | M-010738- cAMP resp           | 148327 | CREB3L4    | 3962   | 9.4902   | 0.0802   |
| 50073 P04 | M-018765- chromosom           | 148304 | C1orf74    | 4124   | 9.1416   | 0.2684   |
| 50073 P05 | M-012833- toll-like rec       | 148022 | TICAM1     | 2411   | 3.567    | 5.843    |
| 50073 P06 | M-021522- synaptotag          | 148281 | SYT6       | 2804   | 9.0585   | 0.3515   |
| 50073 P07 | M-016206- chromosom           | 148046 | C19orf23   | 3775   | 7.6291   | 1.7809   |
| 50073 P08 | M-015736- zinc finger         | 148268 | ZNF570     | 2984   | 8.7131   | 0.6969   |
| 50073 P09 | M-007141- zinc and rir        | 148066 | ZNRF4      | 3156   | 7.1926   | 2.2174   |
| 50073 P10 | M-016710- zinc finger         | 148266 | ZNF569     | 3727   | 5.1248   | 4.2852   |
| 50073 P11 | M-023643- zinc finger         | 148103 | ZNF599     | 4136   | 4.7389   | 4.6711   |
| 50073 P12 | M-016019- zinc finger         | 148254 | ZNF555     | 2831   | 3.8856   | 5.5244   |
| 50073 P13 | M-016707- transmembr          | 148109 | TMEM162    | 4086   | 7.9785   | 1.4315   |
| 50073 P14 | M-016709- hypothetical        | 148231 | FLJ25328   | 3770   | 4.6419   | 4.7681   |
| 50073 P15 | M-015654- cartilage in        | 148113 | CILP2      | 4606   | 9.1403   | 0.2697   |
| 50073 P16 | M-023898- ATPase, Cla         | 148229 | ATP8B3     | 4478   | 3.5507   | 5.8593   |
| 50073 P17 | M-015733- chromosom           | 148137 | C19orf55   | 2813   | 8.1052   | 1.3048   |
| 50073 P18 | M-016708- chromosom           | 148223 | C19orf25   | 3256   | 4.7297   | 4.6803   |
| 50073 P19 | M-031073- hypothetical        | 148145 | LOC148145  | 3616   | 10.73    | 1.32     |
| 50073 P20 | M-015352- zinc finger         | 148213 | ZNF681     | 2455   | 11.65    | 2.24     |
| 50073 P21 | M-015741- zinc finger         | 148156 | ZNF558     | 4585   | 9.4656   | 0.0556   |
| 50073 P23 | M-024001- zinc finger         | 148203 | ZNF738     | 4904   | 16.945   | 7.535    |
|           |                               |        | MAD        | 4288   | 9.40845  | 3.0562   |
|           |                               |        | MAD3       |        |          | 9.1686   |
|           |                               |        | MADc       |        |          | 4.523176 |
| 50073 C22 |                               |        |            | 1983   | 9.3797   |          |
| 50073 D22 |                               |        |            | 1621   | 5.4904   |          |
| 50073 E22 |                               |        |            | 2782   | 5.9669   |          |
| 50073 F22 |                               |        |            | 2064   | 2.6647   |          |
|           |                               | mn     |            | 2112.5 | 5.875425 |          |



|           |  |           |          |          |
|-----------|--|-----------|----------|----------|
|           |  | sd        | 486.1156 | 2.753501 |
| 50073 G22 |  |           | 4267     | 38.481   |
| 50073 H22 |  |           | 5158     | 44.416   |
| 50073 I22 |  |           | 3509     | 35.281   |
| 50073 J22 |  |           | 4165     | 39.64    |
|           |  | mn        | 4274.75  | 39.4545  |
|           |  | sd        | 677.891  | 3.786674 |
|           |  | 3psSD     |          | 11.36002 |
|           |  | 3ngSD     |          | 8.260504 |
|           |  | SumSD     |          | 19.62053 |
|           |  | DiffMn    |          | 33.57908 |
|           |  | SmovrDiff |          | 0.584308 |
|           |  | 1minus    |          | 0.415692 |

|           |                                   |                |      |        |
|-----------|-----------------------------------|----------------|------|--------|
| 50073 G03 | M-003290- polo-like ki            | 5347 PLK1 SMAR | 1054 | 1.9924 |
| 50073 H03 | M-003290- polo-like ki            | 5347 PLK1 SMAR | 1227 | 1.304  |
| 50073 I03 | D-001206- siControl non-targeting |                | 4363 | 7.4948 |
| 50073 J03 | D-001206- siControl non-targeting |                | 4979 | 9.8012 |
| 50073 K03 | D-001600- (siGLO RISC-free siRNA  |                | 7689 | 11.419 |
| 50073 L03 | D-001600- (siGLO RISC-free siRNA  |                | 7205 | 12.491 |

| rZ              | cell ct     | % inf         | AD            | rZ             | cell ct     | % inf         | AD            | rZ             |
|-----------------|-------------|---------------|---------------|----------------|-------------|---------------|---------------|----------------|
| 0.336169        | 2430        | 8.2305        | 1.0795        | -0.25646       | 2827        | 7.959         | 3.781         | -0.85555       |
| <b>5.040164</b> | <b>2182</b> | <b>33.914</b> | <b>24.604</b> | <b>5.82925</b> | <b>1852</b> | <b>28.132</b> | <b>16.392</b> | <b>3.71274</b> |
| -0.46738        | 3211        | 12.146        | 2.836         | 0.671316       | 3303        | 13.896        | 2.156         | 0.488918       |
| -0.54421        | 3206        | 6.9245        | 2.3855        | -0.56592       | 2234        | 6.4011        | 5.3389        | -1.20834       |
| -0.34875        | 1827        | 9.4143        | 0.1043        | 0.024039       | 1865        | 7.9357        | 3.8043        | -0.86083       |
| -0.94853        | 3413        | 11.075        | 1.765         | 0.417542       | 2597        | 15.364        | 3.624         | 0.821355       |
| -0.77756        | 3097        | 5.5538        | 3.7562        | -0.89071       | 2378        | 4.2473        | 7.4927        | -1.69608       |
| -0.67135        | 2985        | 7.5712        | 1.7388        | -0.41268       | 2490        | 12.048        | 0.308         | 0.070428       |
| 0.828522        | 3068        | 12.777        | 3.467         | 0.820831       | 2344        | 12.969        | 1.229         | 0.278993       |
| 0.233586        | 2743        | 10.427        | 1.117         | 0.263998       | 2084        | 8.7332        | 3.0068        | -0.68023       |
| 0.30986         | 3485        | 14.634        | 5.324         | 1.260848       | 2461        | 17.432        | 5.692         | 1.289665       |
| 0.509719        | 2446        | 17.048        | 7.738         | 1.832846       | 1802        | 19.478        | 7.738         | 1.752993       |
| -1.19979        | 3264        | 6.9547        | 2.3553        | -0.55876       | 2893        | 10.508        | 1.232         | -0.27831       |
| 0.60169         | 3082        | 13.692        | 4.382         | 1.037641       | 2149        | 13.96         | 2.22          | 0.503411       |
| -0.51284        | 2143        | 5.8796        | 3.4304        | -0.81351       | 2221        | 9.05          | 2.69          | -0.60849       |
| 1.331487        | 2476        | 17.569        | 8.259         | 1.956297       | 1916        | 15.136        | 3.396         | 0.769723       |
| 0.692113        | 1641        | 16.027        | 6.717         | 1.59092        | 1696        | 11.439        | 0.301         | -0.06748       |
| 0.935084        | 2515        | 13.439        | 4.129         | 0.977693       | 3709        | 18.118        | 6.378         | 1.445013       |
| -0.60821        | 4125        | 13.842        | 4.532         | 1.073184       | 4161        | 5.5516        | 6.1884        | -1.40072       |
| -1.14166        | 2624        | 4.7256        | 4.5844        | -1.08695       | 4021        | 5.2475        | 6.4925        | -1.46958       |
| -0.13691        | 6170        | 9.6596        | 0.3496        | 0.082163       | 5498        | 16.479        | 4.739         | 1.073853       |
| -1.02403        | 4383        | 9.6053        | 0.2953        | 0.069296       | 3788        | 13.015        | 1.275         | 0.28941        |
| -1.0772         | 4475        | 4.514         | 4.796         | -1.13709       | 4260        | 9.3897        | 2.3503        | -0.53156       |
| 0.597711        | 4186        | 15.432        | 6.122         | 1.449935       | 4409        | 17.646        | 5.906         | 1.338126       |
| -0.74093        | 2433        | 6.4529        | 2.8571        | -0.67767       | 3057        | 6.9349        | 4.8051        | -1.08746       |
| -1.0462         | 3018        | 4.3738        | 4.9362        | -1.17031       | 2596        | 6.8182        | 4.9218        | -1.11389       |
| 0.118821        | 3124        | 5.8259        | 3.4841        | -0.82623       | 3395        | 10.545        | 1.195         | -0.26994       |
| -0.27873        | 2161        | 6.4785        | 2.8315        | -0.6716        | 2926        | 13.602        | 1.862         | 0.42234        |
| 0.2568          | 2403        | 7.6571        | 1.6529        | -0.39233       | 2703        | 15.427        | 3.687         | 0.835621       |
| 0.355182        | 3173        | 10.715        | 1.405         | 0.33224        | 3209        | 14.117        | 2.377         | 0.538964       |
| 0.034036        | 2429        | 6.0107        | 3.2993        | -0.78245       | 2490        | 13.133        | 1.393         | 0.316132       |
| 1.523166        | 2868        | 10.495        | 1.185         | 0.280111       | 3166        | 14.593        | 2.853         | 0.646757       |
| -0.3277         | 1533        | 9.85          | 0.54          | 0.127278       | 2112        | 11.79         | 0.05          | 0.012002       |
| 1.003841        | 2707        | 10.417        | 1.107         | 0.261629       | 2818        | 12.065        | 0.325         | 0.074277       |
| 1.803279        | 1927        | 7.836         | 1.474         | -0.34994       | 2394        | 10.401        | 1.339         | -0.30254       |
| 0.986818        | 2719        | 9.4888        | 0.1788        | 0.041691       | 2343        | 7.4691        | 4.2709        | -0.96649       |
| 1.772991        | 2966        | 15.88         | 6.57          | 1.556088       | 3741        | 12.163        | 0.423         | 0.09647        |
| 1.471212        | 3049        | 11.709        | 2.399         | 0.567769       | 3316        | 11.882        | 0.142         | 0.032836       |
| 3.717421        | 4015        | 17.21         | 7.9           | 1.871232       | 4732        | 18.111        | 6.371         | 1.443428       |
| 1.744471        | 3698        | 8.1395        | 1.1705        | -0.27803       | 4545        | 9.659         | 2.081         | -0.47057       |
| 1.088958        | 4841        | 8.49          | 0.82          | -0.19497       | 5684        | 22.854        | 11.114        | 2.517507       |
| 0.465724        | 2359        | 4.8749        | 4.4351        | -1.05157       | 2379        | 11.517        | 0.223         | -0.04982       |
| -0.98133        | 3617        | 1.6588        | 7.6512        | -1.81363       | 4293        | 6.6853        | 5.0547        | -1.14399       |
| 1.404887        | 4526        | 6.9377        | 2.3723        | -0.56279       | 4680        | 18.504        | 6.764         | 1.532425       |
| -0.71278        | 2409        | 5.2719        | 4.0381        | -0.9575        | 2309        | 10.351        | 1.389         | -0.31387       |
| -0.07752        | 2450        | 4.0816        | 5.2284        | -1.23955       | 2375        | 8.8421        | 2.8979        | -0.65557       |

|                 |             |               |               |                 |             |               |               |                 |
|-----------------|-------------|---------------|---------------|-----------------|-------------|---------------|---------------|-----------------|
| 0.100073        | 2695        | 6.4564        | 2.8536        | -0.67684        | 4228        | 19.371        | 7.631         | 1.728762        |
| -0.54671        | 1908        | 7.5472        | 1.7628        | -0.41837        | 3040        | 9.5724        | 2.1676        | -0.49019        |
| -0.23215        | 1917        | 6.4684        | 2.8416        | -0.67399        | 3287        | 9.3398        | 2.4002        | -0.54286        |
| 0.961614        | 2695        | 8.7941        | 0.5159        | -0.12292        | 3273        | 16.59         | 4.85          | 1.098989        |
| <b>2.544794</b> | <b>2858</b> | <b>15.92</b>  | <b>6.61</b>   | <b>1.565566</b> | <b>3006</b> | <b>25.848</b> | <b>14.108</b> | <b>3.195515</b> |
| 1.919127        | 3188        | 8.5006        | 0.8094        | -0.19246        | 4347        | 16.586        | 4.846         | 1.098083        |
| 1.131406        | 2677        | 19.014        | 9.704         | 2.298691        | 2820        | 19.929        | 8.189         | 1.855125        |
| <b>2.807662</b> | <b>2615</b> | <b>22.103</b> | <b>12.793</b> | <b>3.03063</b>  | <b>3244</b> | <b>27.004</b> | <b>15.264</b> | <b>3.457298</b> |
| -0.79565        | 2824        | 2.6912        | 6.6188        | -1.569          | 4250        | 8.5176        | 3.2224        | -0.72905        |
| 1.215197        | 2403        | 10.32         | 1.01          | 0.238645        | 3849        | 12.783        | 1.043         | 0.236873        |
| 0.884898        | 3718        | 10.57         | 1.26          | 0.297882        | 4516        | 10.452        | 1.288         | -0.291          |
| 0.347223        | 3025        | 6.1818        | 3.1282        | -0.7419         | 4693        | 8.3316        | 3.4084        | -0.77117        |
| 1.335024        | 3754        | 6.4198        | 2.8902        | -0.68551        | 4515        | 8.2614        | 3.4786        | -0.78707        |
| 2.832424        | 3791        | 15.642        | 6.332         | 1.499694        | 5162        | 15.246        | 3.506         | 0.794633        |
| 0.005649        | 3583        | 8.3171        | 0.9929        | -0.23594        | 3888        | 10.159        | 1.581         | -0.35735        |
| 0.180084        | 4305        | 13.101        | 3.791         | 0.897603        | 4265        | 12.286        | 0.546         | 0.124324        |
| -0.58204        | 4160        | 5.6731        | 3.6369        | -0.86244        | 4840        | 9.0909        | 2.6491        | -0.59922        |
| -1.35563        | 3399        | 10.121        | 0.811         | 0.191491        | 3762        | 3.6151        | 8.1249        | -1.83925        |
| -1.30792        | 2878        | 8.3739        | 0.9361        | -0.22248        | 3794        | 5.8513        | 5.8887        | -1.33285        |
| -0.19218        | 3396        | 10.718        | 1.408         | 0.332951        | 3964        | 12.008        | 0.268         | 0.061369        |
| -0.96599        | 3010        | 9.6678        | 0.3578        | 0.084106        | 4327        | 10.238        | 1.502         | -0.33946        |
| -0.02055        | 3308        | 14.299        | 4.989         | 1.18147         | 3812        | 19.019        | 7.279         | 1.64905         |
| -0.34621        | 2811        | 8.0754        | 1.2346        | -0.29321        | 2776        | 11.635        | 0.105         | -0.0231         |
| -0.87866        | 3089        | 6.1832        | 3.1268        | -0.74157        | 2922        | 8.5558        | 3.1842        | -0.7204         |
| 0.556368        | 3132        | 8.3972        | 0.9128        | -0.21696        | 3172        | 11.759        | 0.019         | 0.004982        |
| 0.18141         | 3185        | 16.295        | 6.985         | 1.654423        | 3686        | 18.014        | 6.274         | 1.421462        |
| -0.18322        | 3889        | 10.954        | 1.644         | 0.388871        | 3513        | 8.0273        | 3.7127        | -0.84008        |
| -0.41472        | 2473        | 10.109        | 0.799         | 0.188648        | 2899        | 12.177        | 0.437         | 0.09964         |
| -1.13503        | 2472        | 8.5761        | 0.7339        | -0.17457        | 3177        | 2.9588        | 8.7812        | -1.98787        |
| 0.658951        | 3981        | 13.941        | 4.631         | 1.096642        | 3643        | 18.364        | 6.624         | 1.500721        |
| -0.48646        | 4439        | 10.002        | 0.692         | 0.163294        | 6544        | 13.432        | 1.692         | 0.383842        |
| <b>0.798897</b> | <b>4581</b> | <b>24.056</b> | <b>14.746</b> | <b>3.493394</b> | <b>5405</b> | <b>21.776</b> | <b>10.036</b> | <b>2.273388</b> |
| <b>2.378981</b> | <b>5985</b> | <b>28.822</b> | <b>19.512</b> | <b>4.622699</b> | <b>4358</b> | <b>11.886</b> | <b>0.146</b>  | <b>0.033742</b> |
| 0.809951        | 2809        | 11.962        | 2.652         | 0.627717        | 3860        | 16.114        | 4.374         | 0.991196        |
| <b>3.000668</b> | <b>6570</b> | <b>24.764</b> | <b>15.454</b> | <b>3.661155</b> | <b>5851</b> | <b>18.869</b> | <b>7.129</b>  | <b>1.615082</b> |
| 1.516534        | 5440        | 16.232        | 6.922         | 1.639495        | 6237        | 20.891        | 9.151         | 2.072975        |
| 0.247956        | 5308        | 14.732        | 5.422         | 1.284069        | 4153        | 15.916        | 4.176         | 0.946358        |
| 2.264018        | 4915        | 14.791        | 5.481         | 1.298049        | 4649        | 18.907        | 7.167         | 1.623687        |
| -0.42303        | 4990        | 5.2305        | 4.0795        | -0.96731        | 4993        | 11.416        | 0.324         | -0.07269        |
| 0.668015        | 2653        | 9.8756        | 0.5656        | 0.133344        | 3580        | 14.302        | 2.562         | 0.580859        |
| 0.352308        | 2264        | 14.576        | 5.266         | 1.247105        | 2890        | 15.052        | 3.312         | 0.7507          |
| 0.885782        | 3369        | 12.467        | 3.157         | 0.747377        | 3493        | 19.697        | 7.957         | 1.802587        |
| -0.1555         | 3168        | 11.995        | 2.685         | 0.635536        | 2715        | 10.866        | 0.874         | -0.19724        |
| 0.222532        | 3051        | 8.3251        | 0.9849        | -0.23405        | 2982        | 13.146        | 1.406         | 0.319076        |
| 0.851957        | 2764        | 7.8509        | 1.4591        | -0.34641        | 2890        | 11.557        | 0.183         | -0.04076        |
| -0.2616         | 2816        | 6.6051        | 2.7049        | -0.6416         | 4084        | 18.707        | 6.967         | 1.578396        |
| <b>0.730361</b> | <b>2109</b> | <b>17.876</b> | <b>8.566</b>  | <b>2.029041</b> | <b>3198</b> | <b>25.078</b> | <b>13.338</b> | <b>3.021145</b> |

|                 |             |               |               |                 |             |               |               |                 |
|-----------------|-------------|---------------|---------------|-----------------|-------------|---------------|---------------|-----------------|
| 0.578476        | 3952        | 9.1346        | 0.1754        | -0.04224        | 4148        | 22.372        | 10.632        | 2.408356        |
| -0.93013        | 2392        | 3.0518        | 6.2582        | -1.48356        | 2852        | 13.359        | 1.619         | 0.367311        |
| <b>2.918204</b> | <b>3579</b> | <b>12.601</b> | <b>3.291</b>  | <b>0.779128</b> | <b>3852</b> | <b>24.688</b> | <b>12.948</b> | <b>2.932827</b> |
| -0.24152        | 3166        | 3.1586        | 6.1514        | -1.45825        | 4128        | 11.652        | 0.088         | -0.01925        |
| <b>3.102367</b> | <b>3396</b> | <b>7.9505</b> | <b>1.3595</b> | <b>-0.32281</b> | <b>3819</b> | <b>34.119</b> | <b>22.379</b> | <b>5.06853</b>  |
| -1.08414        | 2868        | 3.2427        | 6.0673        | -1.43832        | 4873        | 11.164        | 0.576         | -0.12976        |
| 0.253262        | 5415        | 3.3426        | 5.9674        | -1.41465        | 6979        | 15.575        | 3.835         | 0.869137        |
| -0.81008        | 3156        | 15.304        | 5.994         | 1.419605        | 5509        | 6.8615        | 4.8785        | -1.10408        |
| -0.49015        | 3889        | 14.425        | 5.115         | 1.211326        | 5608        | 13.32         | 1.58          | 0.358479        |
| -0.9128         | 3076        | 15.54         | 6.23          | 1.475525        | 5268        | 9.6621        | 2.0779        | -0.46987        |
| -1.79813        | 2870        | 7.9443        | 1.3657        | -0.32428        | 3758        | 2.6344        | 9.1056        | -2.06134        |
| -1.51607        | 2928        | 14.344        | 5.034         | 1.192133        | 3449        | 6.0597        | 5.6803        | -1.28566        |
| -0.08873        | 3528        | 16.695        | 7.385         | 1.749203        | 2939        | 10.888        | 0.852         | -0.19226        |
| -1.31502        | 1897        | 9.5414        | 0.2314        | 0.054155        | 3354        | 8.6762        | 3.0638        | -0.69314        |
| -0.68115        | 3335        | 22.039        | 12.729        | 3.015465        | 3229        | 16.414        | 4.674         | 1.059133        |
| 0.363141        | 2753        | 23.538        | 14.228        | 3.370654        | 3933        | 12.942        | 1.202         | 0.272879        |
| 0.044648        | 2671        | 30.176        | 20.866        | 4.94353         | 3175        | 16.189        | 4.449         | 1.00818         |
| -1.24418        | 2544        | 12.107        | 2.797         | 0.662075        | 2532        | 10.032        | 1.708         | -0.38611        |
| -0.8325         | 3801        | 18.206        | 8.896         | 2.107235        | 3310        | 11.269        | 0.471         | -0.10598        |
| -1.11788        | 2743        | 6.7444        | 2.5656        | -0.6086         | 3537        | 7.5205        | 4.2195        | -0.95485        |
| -0.34466        | 2527        | 16.898        | 7.588         | 1.797304        | 2918        | 11.857        | 0.117         | 0.027175        |
| -1.14814        | 2788        | 14.347        | 5.037         | 1.192843        | 3147        | 9.7871        | 1.9529        | -0.44157        |
| 0.786295        | 3529        | 14.423        | 5.113         | 1.210852        | 3987        | 12.566        | 0.826         | 0.187732        |
| 0.021766        | 4707        | 15.764        | 6.454         | 1.528602        | 4497        | 14.632        | 2.892         | 0.655589        |
| -0.46356        | 5027        | 14.223        | 4.913         | 1.163462        | 5847        | 11.493        | 0.247         | -0.05526        |
| 0.643475        | 5737        | 21.335        | 12.025        | 2.848652        | 4991        | 19.195        | 7.455         | 1.688906        |
| -0.93157        | 2070        | 7.0531        | 2.2569        | -0.53545        | 2128        | 7.8477        | 3.8923        | -0.88075        |
| -0.63238        | 4472        | 7.0886        | 2.2214        | -0.52704        | 5267        | 4.3099        | 7.4301        | -1.68191        |
| 0.15068         | 4961        | 12.155        | 2.845         | 0.673448        | 5092        | 5.597         | 6.143         | -1.39044        |
| -0.45186        | 3938        | 4.1646        | 5.1454        | -1.21988        | 4767        | 7.5729        | 4.1671        | -0.94298        |
| -0.98892        | 4063        | 6.0546        | 3.2554        | -0.77204        | 5189        | 5.4153        | 6.3247        | -1.43158        |
| -0.53444        | 4570        | 8.7309        | 0.5791        | -0.13789        | 3695        | 8.6604        | 3.0796        | -0.69671        |
| -0.08389        | 3672        | 15.033        | 5.723         | 1.355391        | 4806        | 12.027        | 0.287         | 0.065672        |
| 1.068176        | 2741        | 13.791        | 4.481         | 1.061099        | 3217        | 10.009        | 1.731         | -0.39132        |
| -0.78877        | 3155        | 5.4834        | 3.8266        | -0.90739        | 3374        | 9.4843        | 2.2557        | -0.51014        |
| -0.00174        | 2766        | 6.6522        | 2.6578        | -0.63044        | 3092        | 7.3739        | 4.3661        | -0.98805        |
| 0.268296        | 2681        | 5.4084        | 3.9016        | -0.92516        | 2531        | 16.199        | 4.459         | 1.010445        |
| -0.64502        | 1777        | 4.2206        | 5.0894        | -1.20661        | 2084        | 3.3589        | 8.3811        | -1.89727        |
| 0.749595        | 3761        | 15.209        | 5.899         | 1.397095        | 3742        | 15.794        | 4.054         | 0.918731        |
| -0.35954        | 3131        | 6.1642        | 3.1458        | -0.74607        | 4517        | 10.516        | 1.224         | -0.2765         |
| -0.58024        | 3683        | 10.698        | 1.388         | 0.328212        | 4457        | 9.1317        | 2.6083        | -0.58998        |
| -1.2725         | 2700        | 8.8889        | 0.4211        | -0.10046        | 3254        | 11.033        | 0.707         | -0.15942        |
| -0.89164        | 3249        | 3.7858        | 5.5242        | -1.30964        | 3097        | 8.04          | 3.7           | -0.83721        |
| -1.0206         | 3351        | 4.8045        | 4.5055        | -1.06825        | 4110        | 9.0998        | 2.6402        | -0.59721        |
| -0.9646         | 4193        | 3.8397        | 5.4703        | -1.29686        | 5043        | 5.4928        | 6.2472        | -1.41403        |
| -0.1561         | 4009        | 6.8346        | 2.4754        | -0.58722        | 6766        | 14.366        | 2.626         | 0.595352        |
| -0.82808        | 4100        | 2.9512        | 6.3588        | -1.50739        | 5871        | 9.317         | 2.423         | -0.54802        |

|          |      |        |        |          |      |        |        |          |
|----------|------|--------|--------|----------|------|--------|--------|----------|
| -1.5898  | 5029 | 10.002 | 0.692  | 0.163294 | 5313 | 6.6817 | 5.0583 | -1.1448  |
| -0.67516 | 3882 | 5.0489 | 4.2611 | -1.01034 | 4669 | 9.1026 | 2.6374 | -0.59657 |
| 1.176286 | 4227 | 25.952 | 16.642 | 3.942652 | 4187 | 18.82  | 7.08   | 1.603985 |
| -1.24694 | 4224 | 9.4697 | 0.1597 | 0.037166 | 4759 | 11.809 | 0.069  | 0.016305 |
| -0.31371 | 3102 | 14.894 | 5.584  | 1.322455 | 2771 | 13.533 | 1.793  | 0.406714 |
| -1.10468 | 3615 | 5.9474 | 3.3626 | -0.79744 | 4883 | 12.554 | 0.814  | 0.185014 |
| -0.71144 | 3126 | 8.9891 | 0.3209 | -0.07671 | 3506 | 18.739 | 6.999  | 1.585642 |
| 0.935968 | 4015 | 19.776 | 10.466 | 2.479247 | 3772 | 18.399 | 6.659  | 1.508647 |
| -1.07607 | 3244 | 10.018 | 0.708  | 0.167086 | 2811 | 10.779 | 0.961  | -0.21694 |
| -1.39498 | 2591 | 6.5612 | 2.7488 | -0.652   | 2668 | 10.457 | 1.283  | -0.28986 |
| -1.43104 | 2860 | 6.049  | 3.261  | -0.77337 | 2605 | 8.9443 | 2.7957 | -0.63242 |
| -0.35419 | 2802 | 8.6724 | 0.6376 | -0.15175 | 2340 | 8.0769 | 3.6631 | -0.82885 |
| -1.1718  | 3242 | 3.2387 | 6.0713 | -1.43927 | 2351 | 9.9107 | 1.8293 | -0.41358 |
| -0.4858  | 3454 | 7.8749 | 1.4351 | -0.34072 | 3478 | 9.747  | 1.993  | -0.45065 |
| 1.368408 | 5142 | 17.289 | 7.979  | 1.889951 | 4002 | 16.017 | 4.277  | 0.96923  |
| 0.285983 | 4237 | 12.485 | 3.175  | 0.751642 | 4628 | 13.872 | 2.132  | 0.483483 |
| 1.381452 | 3560 | 19.579 | 10.269 | 2.432567 | 2155 | 19.35  | 7.61   | 1.724007 |
| -0.73058 | 5793 | 9.3043 | 0.0057 | -0.00203 | 4568 | 12.172 | 0.432  | 0.098508 |
| -0.76138 | 5036 | 11.577 | 2.267  | 0.536491 | 4613 | 12.703 | 0.963  | 0.218756 |
| 0.564327 | 5312 | 13.197 | 3.887  | 0.920351 | 3794 | 11.993 | 0.253  | 0.057973 |
| -0.5487  | 3249 | 2.8009 | 6.5091 | -1.54301 | 4597 | 5.6341 | 6.1059 | -1.38204 |
| -0.29531 | 3187 | 7.7189 | 1.5911 | -0.37769 | 3053 | 8.7127 | 3.0273 | -0.68487 |
| 0.32622  | 2924 | 9.9863 | 0.6763 | 0.159574 | 3424 | 11.332 | 0.408  | -0.09171 |
| 1.39737  | 4377 | 14.188 | 4.878  | 1.155168 | 3890 | 12.596 | 0.856  | 0.194525 |
| 0.024131 | 3473 | 11.517 | 2.207  | 0.522274 | 3243 | 8.3256 | 3.4144 | -0.77253 |
| -0.77988 | 3164 | 6.4159 | 2.8941 | -0.68643 | 3227 | 7.995  | 3.745  | -0.8474  |
| 0.435877 | 4514 | 6.5352 | 2.7748 | -0.65817 | 3800 | 6.5526 | 5.1874 | -1.17404 |
| -0.40088 | 4064 | 16.043 | 6.733  | 1.594711 | 3048 | 10.302 | 1.438  | -0.32496 |
| 0.878487 | 4303 | 13.711 | 4.401  | 1.042143 | 2815 | 13.748 | 2.008  | 0.455402 |
| 1.286165 | 4669 | 17.841 | 8.531  | 2.020748 | 3319 | 12.504 | 0.764  | 0.173691 |
| -0.2084  | 2982 | 12.173 | 2.863  | 0.677713 | 2713 | 8.8463 | 2.8937 | -0.65462 |
| 0.914302 | 3740 | 7.6471 | 1.6629 | -0.3947  | 3020 | 8.245  | 3.495  | -0.79078 |
| -1.0674  | 3159 | 6.9959 | 2.3141 | -0.549   | 2455 | 6.1507 | 5.5893 | -1.26505 |
| 0.034235 | 4510 | 11.796 | 2.486  | 0.588383 | 4264 | 12.219 | 0.479  | 0.109152 |
| 0.292173 | 3768 | 13.27  | 3.96   | 0.937648 | 3724 | 11.01  | 0.73   | -0.16463 |
| -0.14124 | 4678 | 12.27  | 2.96   | 0.700698 | 4301 | 12.09  | 0.35   | 0.079939 |
| 1.195078 | 5137 | 25.715 | 16.405 | 3.886495 | 3855 | 16.939 | 5.199  | 1.178022 |
| 0.084973 | 5118 | 8.0305 | 1.2795 | -0.30385 | 4288 | 11.124 | 0.616  | -0.13882 |
| -0.07967 | 5625 | 13.831 | 4.521  | 1.070577 | 4701 | 9.6575 | 2.0825 | -0.47091 |
| -0.19257 | 5724 | 10.203 | 0.893  | 0.210921 | 5122 | 10.445 | 1.295  | -0.29258 |
| 0.625788 | 5094 | 8.0094 | 1.3006 | -0.30885 | 5525 | 9.991  | 1.749  | -0.39539 |
| -0.26337 | 4210 | 9.5724 | 0.2624 | 0.0615   | 5216 | 9.3942 | 2.3458 | -0.53054 |
| 0.57516  | 4455 | 13.872 | 4.562  | 1.080292 | 5374 | 15.091 | 3.351  | 0.759532 |
| -0.08661 | 4598 | 10.265 | 0.955  | 0.225612 | 4091 | 7.9198 | 3.8202 | -0.86443 |
| 1.285502 | 4059 | 18.872 | 9.562  | 2.265044 | 5163 | 28.782 | 17.042 | 3.859936 |
| 0.016305 | 4052 | 9.0326 | 0.2774 | -0.06641 | 6248 | 11.796 | 0.056  | 0.013361 |
| 0.001736 | 2565 | 9.7466 | 0.4366 | 0.102777 | 4264 | 10.999 | 0.741  | -0.16712 |

|          |      |        |        |          |      |        |        |          |
|----------|------|--------|--------|----------|------|--------|--------|----------|
| 0.429687 | 3065 | 19.837 | 10.527 | 2.493701 | 4222 | 15.846 | 4.106  | 0.930506 |
| 0.096448 | 3039 | 4.87   | 4.44   | -1.05273 | 4417 | 8.3541 | 3.3859 | -0.76608 |
| 0.61186  | 3058 | 14.814 | 5.504  | 1.303499 | 3758 | 20.144 | 8.404  | 1.903813 |
| 0.143826 | 2619 | 7.9038 | 1.4062 | -0.33387 | 3537 | 19.112 | 7.372  | 1.67011  |
| -0.83657 | 3330 | 11.051 | 1.741  | 0.411855 | 3841 | 15.152 | 3.412  | 0.773346 |
| -0.20485 | 3564 | 9.3154 | 0.0054 | 0.000604 | 4674 | 16.003 | 4.263  | 0.96606  |
| 0.121784 | 4134 | 12.724 | 3.414  | 0.808273 | 4941 | 15.301 | 3.561  | 0.807088 |
| -0.65194 | 2960 | 6.0135 | 3.2965 | -0.78178 | 3548 | 14.91  | 3.17   | 0.718544 |
| 1.844622 | 5039 | 15.023 | 5.713  | 1.353022 | 6033 | 25.675 | 13.935 | 3.156339 |
| -0.11546 | 3109 | 10.839 | 1.529  | 0.361622 | 4248 | 17.137 | 5.397  | 1.22286  |
| -0.17579 | 4094 | 7.1324 | 2.1776 | -0.51666 | 4890 | 11.431 | 0.309  | -0.0693  |
| -0.56411 | 4365 | 8.1558 | 1.1542 | -0.27416 | 5381 | 15.796 | 4.056  | 0.919183 |
| -0.23367 | 4119 | 6.6278 | 2.6822 | -0.63622 | 5057 | 6.4465 | 5.2935 | -1.19806 |
| -1.09552 | 5091 | 9.6248 | 0.3148 | 0.073917 | 5759 | 6.9109 | 4.8291 | -1.0929  |
| -0.71886 | 4309 | 8.401  | 0.909  | -0.21606 | 4396 | 12.534 | 0.794  | 0.180485 |
| 0.088887 | 4902 | 9.6083 | 0.2983 | 0.070007 | 3814 | 13.424 | 1.684  | 0.382031 |
| -0.69906 | 4849 | 7.218  | 2.092  | -0.49638 | 4503 | 10.437 | 1.303  | -0.29439 |
| -1.50073 | 4955 | 4.2583 | 5.0517 | -1.19768 | 5137 | 8.7794 | 2.9606 | -0.66977 |
| -0.9638  | 3356 | 9.3564 | 0.0464 | 0.010319 | 4753 | 9.1732 | 2.5668 | -0.58059 |
| 0.021346 | 4729 | 12.645 | 3.335  | 0.789554 | 4851 | 11.812 | 0.072  | 0.016984 |
| -0.78859 | 4153 | 10.956 | 1.646  | 0.389345 | 4606 | 12.006 | 0.266  | 0.060917 |
| -0.01978 | 4231 | 11.085 | 1.775  | 0.419912 | 4894 | 9.9714 | 1.7686 | -0.39983 |
| -0.45942 | 2817 | 6.8868 | 2.4232 | -0.57485 | 3463 | 7.4791 | 4.2609 | -0.96423 |
| -0.78342 | 2606 | 11.589 | 2.279  | 0.539334 | 3363 | 10.021 | 1.719  | -0.3886  |
| -0.69357 | 2910 | 6.4605 | 2.8495 | -0.67587 | 3334 | 11.428 | 0.312  | -0.06997 |
| -1.34088 | 4018 | 7.3171 | 1.9929 | -0.47289 | 4191 | 6.2754 | 5.4646 | -1.23681 |
| 0.27935  | 4948 | 12.631 | 3.321  | 0.786237 | 5578 | 15.669 | 3.929  | 0.890424 |
| -1.01505 | 4152 | 7.0087 | 2.3013 | -0.54597 | 5526 | 9.7358 | 2.0042 | -0.45318 |
| -0.96626 | 3401 | 5.4984 | 3.8116 | -0.90384 | 4588 | 10.31  | 1.43   | -0.32315 |
| 1.030592 | 5394 | 16.518 | 7.208  | 1.707263 | 5759 | 16.565 | 4.825  | 1.093328 |
| -0.26863 | 4262 | 10.371 | 1.061  | 0.250729 | 5268 | 7.6879 | 4.0521 | -0.91694 |
| -0.56718 | 4779 | 8.5164 | 0.7936 | -0.18872 | 4425 | 11.864 | 0.124  | 0.02876  |
| -1.14673 | 3973 | 5.8142 | 3.4958 | -0.82901 | 3670 | 2.4251 | 9.3149 | -2.10873 |
| -0.3298  | 5635 | 9.0683 | 0.2417 | -0.05795 | 4595 | 12.492 | 0.752  | 0.170974 |
| -0.67339 | 4653 | 5.9961 | 3.3139 | -0.7859  | 4146 | 10.902 | 0.838  | -0.18909 |
| 0.568085 | 5774 | 12.383 | 3.073  | 0.727473 | 5362 | 15.927 | 4.187  | 0.948849 |
| -0.78775 | 3942 | 8.2953 | 1.0147 | -0.24111 | 2980 | 11.007 | 0.733  | -0.16531 |
| -0.29569 | 5152 | 3.222  | 6.088  | -1.44323 | 4514 | 10.722 | 1.018  | -0.22985 |
| -0.73954 | 5059 | 7.5904 | 1.7196 | -0.40814 | 4174 | 12.698 | 0.958  | 0.217624 |
| 0.212141 | 4831 | 9.1906 | 0.1194 | -0.02897 | 3917 | 14.067 | 2.327  | 0.527642 |
| 0.061207 | 5152 | 9.1615 | 0.1485 | -0.03586 | 4546 | 13.792 | 2.052  | 0.465366 |
| -0.39542 | 2714 | 8.9536 | 0.3564 | -0.08512 | 3082 | 10.772 | 0.968  | -0.21853 |
| 1.846612 | 2829 | 19.689 | 10.379 | 2.458632 | 2687 | 18.72  | 6.98   | 1.58134  |
| 0.27515  | 2786 | 7.3941 | 1.9159 | -0.45465 | 2853 | 11.742 | 0.002  | 0.001132 |
| -0.98737 | 3406 | 4.1691 | 5.1409 | -1.21881 | 2935 | 8.075  | 3.665  | -0.82928 |
| -1.40851 | 3677 | 7.5061 | 1.8039 | -0.42811 | 3360 | 6.4881 | 5.2519 | -1.18864 |
| 1.659133 | 5185 | 8.4089 | 0.9011 | -0.21419 | 5450 | 8.3486 | 3.3914 | -0.76732 |

|                 |             |               |               |                 |             |               |               |                 |
|-----------------|-------------|---------------|---------------|-----------------|-------------|---------------|---------------|-----------------|
| 1.230452        | 2997        | 14.448        | 5.138         | 1.216775        | 3643        | 10.321        | 1.419         | -0.32066        |
| 0.214352        | 5226        | 5.5874        | 3.7226        | -0.88275        | 4665        | 11.447        | 0.293         | -0.06567        |
| 2.362179        | 4951        | 13.209        | 3.899         | 0.923194        | 5311        | 13.99         | 2.25          | 0.510205        |
| 1.639456        | 5254        | 15.874        | 6.564         | 1.554667        | 6252        | 12.028        | 0.288         | 0.065899        |
| -0.28795        | 4577        | 8.4335        | 0.8765        | -0.20836        | 5704        | 12.482        | 0.742         | 0.168709        |
| 0.466166        | 3886        | 5.9701        | 3.3399        | -0.79207        | 5213        | 6.292         | 5.448         | -1.23305        |
| -0.73365        | 3503        | 7.622         | 1.688         | -0.40065        | 4802        | 7.7051        | 4.0349        | -0.91305        |
| -0.65877        | 2682        | 4.959         | 4.351         | -1.03165        | 5611        | 4.705         | 7.035         | -1.59244        |
| 0.647233        | 3716        | 11.598        | 2.288         | 0.541467        | 3589        | 9.8913        | 1.8487        | -0.41797        |
| 1.447998        | 4560        | 10.57         | 1.26          | 0.297882        | 5609        | 11.268        | 0.472         | -0.10621        |
| 0.955203        | 5109        | 8.9646        | 0.3454        | -0.08252        | 5242        | 9.9962        | 1.7438        | -0.39421        |
| 1.435175        | 3591        | 12.141        | 2.831         | 0.670131        | 3742        | 11.732        | 0.008         | -0.00113        |
| -0.2744         | 4865        | 9.1059        | 0.2041        | -0.04904        | 5410        | 10.148        | 1.592         | -0.35984        |
| 1.503269        | 4061        | 13.593        | 4.283         | 1.014183        | 4886        | 13.795        | 2.055         | 0.466046        |
| 0.310081        | 4768        | 7.4245        | 1.8855        | -0.44745        | 5249        | 7.5443        | 4.1957        | -0.94946        |
| 1.530683        | 2273        | 8.491         | 0.819         | -0.19474        | 3059        | 11.769        | 0.029         | 0.007247        |
| -0.38784        | 3302        | 6.9958        | 2.3142        | -0.54903        | 2163        | 6.4263        | 5.3137        | -1.20264        |
| 0.574939        | 2579        | 6.3591        | 2.9509        | -0.69989        | 2808        | 11.004        | 0.736         | -0.16599        |
| 2.030332        | 3807        | 10.848        | 1.538         | 0.363754        | 3304        | 8.5351        | 3.2049        | -0.72509        |
| 1.185351        | 4062        | 12.777        | 3.467         | 0.820831        | 4097        | 12.033        | 0.293         | 0.067031        |
| -0.18634        | 4233        | 8.7645        | 0.5455        | -0.12993        | 3302        | 9.8728        | 1.8672        | -0.42216        |
| <b>2.955346</b> | <b>6585</b> | <b>24.784</b> | <b>15.474</b> | <b>3.665894</b> | <b>5165</b> | <b>22.439</b> | <b>10.699</b> | <b>2.423528</b> |
| 1.413288        | 5606        | 11.452        | 2.142         | 0.506872        | 4752        | 15.025        | 3.285         | 0.744586        |
| 0.31605         | 3926        | 4.8905        | 4.4195        | -1.04788        | 4416        | 7.7219        | 4.0181        | -0.90924        |
| 0.19357         | 4084        | 6.7581        | 2.5519        | -0.60535        | 4026        | 11.078        | 0.662         | -0.14923        |
| 0.399399        | 3506        | 6.8169        | 2.4931        | -0.59142        | 3301        | 9.3002        | 2.4398        | -0.55183        |
| -1.7194         | 2463        | 2.8015        | 6.5085        | -1.54287        | 2099        | 5.2406        | 6.4994        | -1.47115        |
| 0.075356        | 4511        | 11.439        | 2.129         | 0.503792        | 6315        | 20.317        | 8.577         | 1.942989        |
| 0.651213        | 4396        | 10.1          | 0.79          | 0.186515        | 6288        | 13.979        | 2.239         | 0.507714        |
| 1.249465        | 4612        | 7.4371        | 1.8729        | -0.44446        | 5397        | 17.009        | 5.269         | 1.193874        |
| 0.027226        | 5172        | 7.4633        | 1.8467        | -0.43825        | 6442        | 8.3204        | 3.4196        | -0.77371        |
| -0.78804        | 2810        | 3.1317        | 6.1783        | -1.46463        | 3859        | 2.8505        | 8.8895        | -2.0124         |
| -0.89942        | 3374        | 7.2614        | 2.0486        | -0.48609        | 5727        | 13.253        | 1.513         | 0.343307        |
| 0.004123        | 5190        | 9.3449        | 0.0349        | 0.007594        | 5954        | 13.168        | 1.428         | 0.324058        |
| -0.33982        | 3300        | 6.0303        | 3.2797        | -0.7778         | 5681        | 11.142        | 0.598         | -0.13474        |
| <b>4.453408</b> | <b>3092</b> | <b>19.373</b> | <b>10.063</b> | <b>2.383756</b> | <b>5497</b> | <b>28.597</b> | <b>16.857</b> | <b>3.818042</b> |
| 0.34457         | 3322        | 8.4287        | 0.8813        | -0.2095         | 4400        | 13.705        | 1.965         | 0.445665        |
| 0.264316        | 4725        | 12.571        | 3.261         | 0.77202         | 4769        | 12.12         | 0.38          | 0.086733        |
| 0.671552        | 4249        | 7.9313        | 1.3787        | -0.32736        | 5642        | 9.252         | 2.488         | -0.56274        |
| 0.502645        | 5125        | 4.3317        | 4.9783        | -1.18029        | 6495        | 9.746         | 1.994         | -0.45087        |
| 2.171826        | 3833        | 16.775        | 7.465         | 1.768159        | 3850        | 20.416        | 8.676         | 1.965408        |
| 1.472759        | 5182        | 15.477        | 6.167         | 1.460597        | 5664        | 18.291        | 6.551         | 1.48419         |
| 2.305139        | 4919        | 15.349        | 6.039         | 1.430268        | 3795        | 18.656        | 6.916         | 1.566847        |
| 0.945696        | 5957        | 8.7124        | 0.5976        | -0.14228        | 5242        | 8.47          | 3.27          | -0.73983        |
| 0.033859        | 5313        | 7.8675        | 1.4425        | -0.34248        | 4307        | 12.422        | 0.682         | 0.155122        |
| -0.54733        | 3853        | 7.1113        | 2.1987        | -0.52166        | 3157        | 8.5207        | 3.2193        | -0.72835        |
| -0.02086        | 3915        | 6.1047        | 3.2053        | -0.76017        | 4833        | 11.649        | 0.091         | -0.01993        |

|                 |             |               |               |                 |             |               |               |                 |
|-----------------|-------------|---------------|---------------|-----------------|-------------|---------------|---------------|-----------------|
| 1.796205        | 4273        | 18.441        | 9.131         | 2.162918        | 4130        | 17.409        | 5.669         | 1.284456        |
| 0.795138        | 4206        | 17.808        | 8.498         | 2.012928        | 4590        | 15.882        | 4.142         | 0.938659        |
| -0.08252        | 3593        | 7.292         | 2.018         | -0.47884        | 4825        | 11.233        | 0.507         | -0.11413        |
| 0.361814        | 4789        | 7.2458        | 2.0642        | -0.48979        | 4744        | 15.831        | 4.091         | 0.927109        |
| 0.374637        | 4032        | 7.8373        | 1.4727        | -0.34963        | 3964        | 7.3915        | 4.3485        | -0.98406        |
| 0.676195        | 3119        | 8.8169        | 0.4931        | -0.11752        | 4710        | 17.707        | 5.967         | 1.35194         |
| -0.91015        | 2787        | 5.0592        | 4.2508        | -1.0079         | 3156        | 8.7136        | 3.0264        | -0.68467        |
| 1.568268        | 3816        | 11.137        | 1.827         | 0.432233        | 4322        | 11.199        | 0.541         | -0.12183        |
| 0.892857        | 3069        | 12.773        | 3.463         | 0.819884        | 3696        | 21.834        | 10.094        | 2.286523        |
| -0.29558        | 2536        | 10.213        | 0.903         | 0.213291        | 2612        | 12.289        | 0.549         | 0.125004        |
| <b>2.343387</b> | <b>4832</b> | <b>20.137</b> | <b>10.827</b> | <b>2.564786</b> | <b>4759</b> | <b>30.952</b> | <b>19.212</b> | <b>4.351345</b> |
| 2.12783         | 4100        | 13.707        | 4.397         | 1.041195        | 4677        | 14.881        | 3.141         | 0.711977        |
| 1.781613        | 4250        | 13.929        | 4.619         | 1.093798        | 4492        | 14.337        | 2.597         | 0.588785        |
| 1.118805        | 4476        | 11.148        | 1.838         | 0.434839        | 5131        | 12.882        | 1.142         | 0.259292        |
| 1.216745        | 4446        | 12.146        | 2.836         | 0.671316        | 4652        | 12.855        | 1.115         | 0.253177        |
| -0.23451        | 5361        | 6.2302        | 3.0798        | -0.73043        | 6086        | 6.3753        | 5.3647        | -1.21419        |
| -0.91906        | 3771        | 4.0573        | 5.2527        | -1.2453         | 3759        | 7.0764        | 4.6636        | -1.05542        |
| 1.208786        | 4403        | 15.853        | 6.543         | 1.549691        | 4987        | 16.603        | 4.863         | 1.101933        |
| 0.541334        | 3763        | 7.3877        | 1.9223        | -0.45616        | 3465        | 6.6378        | 5.1022        | -1.15474        |
| 0.018074        | 3694        | 3.059         | 6.251         | -1.48185        | 2823        | 6.8367        | 4.9033        | -1.1097         |
| -0.059          | 4312        | 8.6039        | 0.7061        | -0.16799        | 4745        | 6.8493        | 4.8907        | -1.10685        |
| -1.29145        | 2918        | 8.3276        | 0.9824        | -0.23346        | 2813        | 12.798        | 1.058         | 0.240269        |
| -0.07737        | 4641        | 8.3818        | 0.9282        | -0.22061        | 4253        | 6.1839        | 5.5561        | -1.25753        |
| -0.39339        | 5094        | 11.602        | 2.292         | 0.542415        | 4972        | 10.177        | 1.563         | -0.35327        |
| -0.15373        | 2900        | 9.3103        | 0.0003        | -0.0006         | 2907        | 16.546        | 4.806         | 1.089025        |
| -0.48989        | 4716        | 13.147        | 3.837         | 0.908503        | 3291        | 12.914        | 1.174         | 0.266538        |
| -0.94704        | 5141        | 15.367        | 6.057         | 1.434533        | 3821        | 14.342        | 2.602         | 0.589917        |
| -1.03236        | 3107        | 7.8854        | 1.4246        | -0.33823        | 3247        | 6.9911        | 4.7489        | -1.07474        |
| -1.22101        | 3215        | 7.465         | 1.845         | -0.43785        | 2632        | 13.45         | 1.71          | 0.387919        |
| -0.31614        | 3827        | 12.569        | 3.259         | 0.771546        | 2225        | 18.202        | 6.462         | 1.464036        |
| -1.05381        | 4709        | 13.379        | 4.069         | 0.963476        | 2895        | 16.304        | 4.564         | 1.034223        |
| -0.05928        | 4124        | 8.5839        | 0.7261        | -0.17272        | 2349        | 11.707        | 0.033         | -0.00679        |
| -1.29505        | 3471        | 3.1691        | 6.1409        | -1.45576        | 1966        | 9.9186        | 1.8214        | -0.41179        |
| -0.28813        | 3761        | 7.0726        | 2.2374        | -0.53083        | 1944        | 16.872        | 5.132         | 1.16285         |
| -1.03439        | 5135        | 7.2833        | 2.0267        | -0.4809         | 3499        | 13.432        | 1.692         | 0.383842        |
| 0.292173        | 4234        | 11.266        | 1.956         | 0.4628          | 2395        | 17.035        | 5.295         | 1.199762        |
| 0.49557         | 4126        | 7.9254        | 1.3846        | -0.32876        | 2196        | 23.953        | 12.213        | 2.766382        |
| 0.012635        | 3480        | 5.0862        | 4.2238        | -1.00151        | 2766        | 10.774        | 0.966         | -0.21808        |
| 1.666208        | 4679        | 9.6388        | 0.3288        | 0.077234        | 2995        | 13.289        | 1.549         | 0.351459        |
|                 | 3680        | 9.31285       | 2.85155       |                 | 3859.5      | 11.737        | 2.9837        |                 |
|                 |             |               | 8.55465       |                 |             |               | 8.9511        |                 |
|                 |             |               | 4.220294      |                 |             |               | 4.415876      |                 |
| 2321            | 5.4287      |               | 2925          | 8.1026          |             |               |               |                 |
| 2893            | 13.93       |               | 3663          | 8.9817          |             |               |               |                 |
| 1423            | 4.6381      |               | 2755          | 10.744          |             |               |               |                 |
| 2222            | 11.521      |               | 2929          | 8.6036          |             |               |               |                 |
| 2214.75         | 8.87945     |               | 3068          | 9.107975        |             |               |               |                 |



|          |          |          |          |      |        |
|----------|----------|----------|----------|------|--------|
| 605.0435 | 4.560065 | 404.872  | 1.148578 |      |        |
|          |          | 4507     | 44.753   | 3010 | 25.415 |
| 5074     | 44.974   | 4044     | 49.085   |      |        |
| 5278     | 35.108   | 4458     | 36.294   |      |        |
| 4956     | 44.431   | 4596     | 43.168   |      |        |
| 5102.667 | 41.50433 | 4401.25  | 43.325   |      |        |
| 162.9028 | 5.546037 | 244.9209 | 5.312764 |      |        |
|          | 16.63811 |          | 15.93829 |      |        |
|          | 13.68019 |          | 3.445735 |      |        |
|          | 30.3183  |          | 19.38403 |      |        |
|          | 32.62488 |          | 34.21703 |      |        |
|          | 0.9293   |          | 0.566502 |      |        |
|          | 0.0707   |          | 0.433498 |      |        |

|      |        |      |        |  |  |
|------|--------|------|--------|--|--|
| 345  | 4.3478 | 951  | 2.2082 |  |  |
| 771  | 13.489 | 686  | 6.8513 |  |  |
| 2288 | 9.0035 | 4386 | 7.1135 |  |  |
| 3306 | 10.284 | 5626 | 15.286 |  |  |
| 6791 | 19.541 | 6410 | 16.771 |  |  |
| 6815 | 15.554 | 6511 | 19.121 |  |  |

y

y

y

y

y

y

y

y

y





y

y

y



|                  |                               |                      | cell ct     | % inf         | AD           |
|------------------|-------------------------------|----------------------|-------------|---------------|--------------|
| 50074 A02        | M-007146- ring finger         | 153830 RNF145        | 4303        | 14.478        | 0.122        |
| 50074 A04        | M-007145- SH3 domai           | 153769 SH3RF2        | 2615        | 16.023        | 1.423        |
| 50074 A05        | M-016528- chromoson           | 150135 C21orf129     | 3111        | 13.533        | 1.067        |
| 50074 A06        | M-019471- PRELI domi          | 153768 PRELID2       | 4289        | 12.45         | 2.15         |
| 50074 A07        | M-021431- chromoson           | 150142 C21orf121     | 4279        | 26.198        | 11.598       |
| 50074 A08        | M-015305- family with         | 153745 FAM71B        | 2484        | 11.192        | 3.408        |
| 50074 A09        | M-016529- chromoson           | 150147 C21orf128     | 3293        | 14.121        | 0.479        |
| 50074 A10        | M-031957- protein pho         | 153743 PPP1R2P3      | 4598        | 13.636        | 0.964        |
| 50074 A11        | M-016836- Na+/H+ exc          | 150159 NHEDC1        | 4201        | 15.211        | 0.611        |
| 50074 A12        | M-015448- coiled-coil         | 153733 CCDC112       | 3343        | 9.0039        | 5.5961       |
| <b>50074 A13</b> | <b>M-017648- T-complex</b>    | <b>150160 CESK1</b>  | <b>4295</b> | <b>22.98</b>  | <b>8.38</b>  |
| 50074 A14        | M-019313- hypothetic          | 153684 LOC153684     | 3569        | 17.12         | 2.52         |
| 50074 A15        | M-018044- XK, Kell blo        | 150165 XKR3          | 2745        | 8.8889        | 5.7111       |
| 50074 A16        | M-017051- hypothetic          | 153657 FLJ25439      | 4114        | 8.9451        | 5.6549       |
| 50074 A17        | M-008134- apoptosis-i         | 150209 AIFM3         | 3626        | 15.361        | 0.761        |
| 50074 A18        | M-015447- family with         | 153643 FAM81B        | 2644        | 10.401        | 4.199        |
| 50074 A19        | M-024547- LOC150223           | 150223 LOC150223     | 3203        | 11.083        | 3.517        |
| 50074 A20        | M-024328- arylsulfatas        | 153642 ARSK          | 3486        | 17.785        | 3.185        |
| 50074 A21        | M-017628- similar to h        | 150236 LOC150236     | 3988        | 15.12         | 0.52         |
| 50074 A23        | M-016350- FLJ31568 p          | 150244 FLJ31568      | 2963        | 6.4124        | 8.1876       |
| 50074 B02        | M-018038- outer dens          | 161753 ODF3L1        | 3965        | 10.618        | 3.982        |
| 50074 B04        | M-016638- sprouty-rel         | 161742 SPRED1        | 4494        | 15.576        | 0.976        |
| 50074 B05        | M-028608- hypothetic          | 153910 LOC153910     | 4378        | 14.344        | 0.256        |
| 50074 B06        | M-008841- OTU domai           | 161725 OTUD7A        | 4114        | 9.3583        | 5.2417       |
| 50074 B07        | M-018855- chromoson           | 154007 C6orf151      | 3805        | 12.431        | 2.169        |
| 50074 B08        | M-015300- dyslexia su         | 161582 DYX1C1        | 4039        | 14.731        | 0.131        |
| 50074 B09        | M-018546- CNKSR fam           | 154043 CNKSR3        | 6019        | 16.448        | 1.848        |
| 50074 B10        | M-016748- TBC1 doma           | 161514 TBC1D21       | 4181        | 7.558         | 7.042        |
| <b>50074 B11</b> | <b>M-017094- retinoic aci</b> | <b>154064 RAET1L</b> | <b>5383</b> | <b>24.317</b> | <b>9.717</b> |
| 50074 B12        | M-018516- chromoson           | 161502 C15orf26      | 4327        | 10.608        | 3.992        |
| 50074 B13        | M-015449- sterile alph        | 154075 SAMD3         | 5213        | 10.551        | 4.049        |
| 50074 B14        | M-019224- echinoderr          | 161436 EML5          | 4858        | 13.956        | 0.644        |
| 50074 B15        | M-016494- hypothetic          | 154089 RP4-662A9     | 4826        | 9.1794        | 5.4206       |
| 50074 B16        | M-017798- chromoson           | 161424 C14orf21      | 5778        | 9.6227        | 4.9773       |
| 50074 B17        | M-007512- solute carri        | 154091 SLC2A12       | 4687        | 9.8784        | 4.7216       |
| 50074 B18        | M-030311- chromoson           | 161394 C14orf174     | 6608        | 9.201         | 5.399        |
| 50074 B19        | M-028605- hypothetic          | 154092 LOC154092     | 6547        | 8.7521        | 5.8479       |
| 50074 B20        | M-021977- chromoson           | 161380 C14orf42      | 6084        | 13.494        | 1.106        |
| 50074 B21        | M-010303- membrane            | 154141 MBOAT1        | 6091        | 14.349        | 0.251        |
| 50074 B23        | M-015693- hepatoma            | 154150 HDGFL1        | 6082        | 16.458        | 1.858        |
| 50074 C02        | M-015446- butyrophili         | 153579 BTNL9         | 6231        | 12.887        | 1.713        |
| 50074 C04        | M-032005- iroquois hc         | 153572 IRX2          | 5193        | 16.773        | 2.173        |
| 50074 C05        | M-018678- chromoson           | 150248 C22orf15      | 4984        | 15.55         | 0.95         |
| 50074 C06        | M-017934- chromoson           | 153571 C5orf38       | 5725        | 11.389        | 3.211        |
| 50074 C07        | M-017718- HscB iron-s         | 150274 HSCB          | 5121        | 10.291        | 4.309        |
| 50074 C08        | M-017054- MARVEL dc           | 153562 MARVELD2      | 3838        | 7.999         | 6.601        |

|                  |                               |               |                  |             |               |               |
|------------------|-------------------------------|---------------|------------------|-------------|---------------|---------------|
| 50074 C09        | M-018556- coiled-coil         | 150275        | CCDC117          | 4801        | 6.9152        | 7.6848        |
| 50074 C10        | M-024458- glucuronid          | 153561        | GUSBP1           | 4264        | 9.0994        | 5.5006        |
| 50074 C11        | M-016850- HORMA do            | 150280        | HORMAD2          | 4737        | 5.1932        | 9.4068        |
| 50074 C12        | M-017090- zinc finger,        | 153527        | ZMAT2            | 2237        | 11.757        | 2.843         |
| 50074 C13        | M-016517- chromoson           | 150291        | C22orf27         | 3497        | 3.7461        | 10.8539       |
| 50074 C14        | M-030346- chromoson           | 153514        | C14orf81         | 5315        | 9.031         | 5.569         |
| 50074 C15        | M-024568- hypothetic          | 150297        | RP1-127L4.       | 3507        | 13.345        | 1.255         |
| 50074 C16        | M-031878- KIAA1909 p          | 153478        | KIAA1909         | 4655        | 7.9699        | 6.6301        |
| 50074 C17        | M-018332- ENTH dom            | 150350        | ENTHD1           | 5282        | 5.4714        | 9.1286        |
| 50074 C18        | M-015445- serum resp          | 153443        | SRFBP1           | 4744        | 4.0683        | 10.5317       |
| 50074 C19        | M-008922- DnaJ (Hsp4          | 150353        | DNAJB7           | 5768        | 14.199        | 0.401         |
| 50074 C20        | M-016745- transmemk           | 153396        | TMEM161f         | 5302        | 8.9589        | 5.6411        |
| 50074 C21        | M-031490- hypothetic          | 150356        | RP4-756G2        | 6097        | 10.645        | 3.955         |
| 50074 C23        | M-024578- meiosis del         | 150365        | RP5-821D1        | 4237        | 4.1775        | 10.4225       |
| 50074 D02        | M-019402- MAM dom             | 161357        | MDGA2            | 5193        | 4.0632        | 10.5368       |
| 50074 D04        | M-021969- transmemk           | 161291        | TMEM30B          | 4970        | 15.151        | 0.551         |
| 50074 D05        | M-018545- poly(A)-spe         | 154197        | PNLDC1           | 4483        | 10.306        | 4.294         |
| 50074 D06        | M-008318- RAS (RAD a          | 161253        | REM2             | 3446        | 3.4533        | 11.1467       |
| 50074 D07        | M-007147- IBR domair          | 154214        | IBRDC1           | 5930        | 11.231        | 3.369         |
| <b>50074 D08</b> | <b>M-031931- similar to C</b> | <b>161247</b> | <b>LOC161247</b> | <b>4423</b> | <b>28.917</b> | <b>14.317</b> |
| 50074 D09        | M-016746- T-cell lym          | 154215        | TCBA1            | 6126        | 12.569        | 2.031         |
| 50074 D10        | M-018015- C-type lecti        | 161198        | CLEC14A          | 6386        | 15.612        | 1.012         |
| 50074 D11        | M-028649- hypothetic          | 154222        | LOC154222        | 5059        | 8.8753        | 5.7247        |
| 50074 D12        | M-016637- chromoson           | 161176        | C14orf49         | 4270        | 5.9719        | 8.6281        |
| <b>50074 D13</b> | <b>M-018380- chromoson</b>    | <b>154313</b> | <b>C6orf165</b>  | <b>4884</b> | <b>29.648</b> | <b>15.048</b> |
| 50074 D14        | M-018974- chromoson           | 161145        | C14orf83         | 5913        | 19.28         | 4.68          |
| 50074 D15        | M-016989- chromoson           | 154386        | C6orf195         | 5868        | 15.133        | 0.533         |
| 50074 D16        | M-018521- chromoson           | 161142        | C14orf54         | 6500        | 14.677        | 0.077         |
| 50074 D17        | M-024909- hypothetic          | 154449        | LOC154449        | 5895        | 17.625        | 3.025         |
| 50074 D18        | M-016122- stomatin (E         | 161003        | STOML3           | 7641        | 19.749        | 5.149         |
| 50074 D19        | M-025090- chromoson           | 154467        | C6orf129         | 6230        | 8.4751        | 6.1249        |
| <b>50074 D20</b> | <b>M-016742- coiled-coil</b>  | <b>160857</b> | <b>CCDC122</b>   | <b>7435</b> | <b>28.46</b>  | <b>13.86</b>  |
| 50074 D21        | M-015403- Rap2-bindi          | 154661        | RPIB9            | 5915        | 14.134        | 0.466         |
| 50074 D23        | M-016990- hypothetic          | 154743        | FLJ31818         | 3811        | 6.56          | 8.04          |
| 50074 E02        | M-031934- similar to n        | 153364        | LOC153364        | 2733        | 11.636        | 2.964         |
| 50074 E04        | M-017783- transmemk           | 153339        | TMEM167          | 4070        | 16.855        | 2.255         |
| 50074 E05        | M-024579- family with         | 150368        | FAM109B          | 4871        | 16.978        | 2.378         |
| 50074 E06        | M-007347- similar to C        | 153328        | LOC153328        | 5379        | 15.282        | 0.682         |
| 50074 E07        | M-018753- NFAT activ          | 150372        | NFAM1            | 5944        | 15.898        | 1.298         |
| 50074 E08        | M-016493- coiled-coil         | 153241        | CCDC100          | 4149        | 12.389        | 2.211         |
| 50074 E09        | M-009563- patatin-like        | 150379        | PNPLA5           | 5037        | 15.823        | 1.223         |
| 50074 E10        | M-015907- adult retina        | 153222        | LOC153222        | 5939        | 17.427        | 2.827         |
| 50074 E11        | M-032224- similar to R        | 150383        | LOC150383        | 6131        | 17.534        | 2.934         |
| <b>50074 E12</b> | <b>M-028439- serine PI K</b>  | <b>153218</b> | <b>SPINK5L3</b>  | <b>5961</b> | <b>26.858</b> | <b>12.258</b> |
| 50074 E13        | M-009837- tubulin tyrc        | 150465        | TTL              | 4793        | 9.8268        | 4.7732        |
| 50074 E14        | M-007551- solute carri        | 153201        | SLC36A2          | 5939        | 18.421        | 3.821         |
| <b>50074 E15</b> | <b>M-018844- cytoskeletc</b>  | <b>150468</b> | <b>CKAP2L</b>    | <b>6735</b> | <b>36.808</b> | <b>22.208</b> |

|                  |                               |                         |             |               |               |
|------------------|-------------------------------|-------------------------|-------------|---------------|---------------|
| 50074 E16        | M-007337- hypothetical        | 153129 FLJ90709         | 6171        | 15.54         | 0.94          |
| 50074 E17        | M-016624- COBW dom            | 150472 CBWD2            | 5157        | 14.505        | 0.095         |
| 50074 E18        | M-008249- DAB2 inter          | 153090 DAB2IP           | 5167        | 11.961        | 2.639         |
| 50074 E19        | M-015660- tektin 4            | 150483 TEK4             | 5976        | 7.2122        | 7.3878        |
| 50074 E20        | M-015444- RasGEF dom          | 153020 RASGEF1B         | 7482        | 20.957        | 6.357         |
| 50074 E21        | M-016518- hypothetical        | 150538 FLJ32063         | 7438        | 21.484        | 6.884         |
| <b>50074 E23</b> | <b>M-027795- hypothetical</b> | <b>150568 LOC150568</b> | <b>5930</b> | <b>36.863</b> | <b>22.263</b> |
| 50074 F02        | M-018416- coiled-coil         | 160777 CCDC60           | 5223        | 16.102        | 1.502         |
| 50074 F04        | M-016858- coiled-coil         | 160762 CCDC63           | 5897        | 20.892        | 6.292         |
| 50074 F05        | M-027202- hypothetical        | 154791 HSPC268          | 3154        | 20.26         | 5.66          |
| 50074 F06        | M-007596- solute carri        | 160728 SLC5A8           | 4746        | 19.258        | 4.658         |
| 50074 F07        | M-015417- angiomotir          | 154796 AMOT             | 4691        | 13.281        | 1.319         |
| 50074 F08        | M-017364- hypothetical        | 160518 MGC24039         | 4419        | 10.704        | 3.896         |
| 50074 F09        | M-018539- vitamin K e         | 154807 VKORC1L1         | 4900        | 16.918        | 2.318         |
| <b>50074 F10</b> | <b>M-016857- intermedia</b>   | <b>160492 IFLTD1</b>    | <b>5739</b> | <b>22.687</b> | <b>8.087</b>  |
| 50074 F11        | M-017595- angiomotir          | 154810 AMOTL1           | 1928        | 11.566        | 3.034         |
| 50074 F12        | M-026918- aldehyde d          | 160428 ALDH1L2          | 3360        | 12.381        | 2.219         |
| 50074 F13        | M-029221- hypothetical        | 154822 LOC154822        | 4106        | 7.9152        | 6.6848        |
| 50074 F14        | M-016856- chromoson           | 160419 C12orf50         | 4202        | 11.756        | 2.844         |
| 50074 F15        | M-018861- IQ motif an         | 154865 IQUB             | 3603        | 13.822        | 0.778         |
| 50074 F16        | M-018618- transmemk           | 160418 TMTC3            | 5217        | 17.961        | 3.361         |
| 50074 F17        | M-016991- potassium           | 154881 KCTD7            | 4396        | 9.8271        | 4.7729        |
| 50074 F18        | M-016625- dendritic c         | 160365 DCAL1            | 4616        | 10.095        | 4.505         |
| 50074 F19        | M-028939- hypothetical        | 155006 LOC155006        | 3930        | 11.374        | 3.226         |
| 50074 F20        | M-021369- C-type lecti        | 160364 CLEC12A          | 5837        | 17.663        | 3.063         |
| 50074 F21        | M-025497- family with         | 155019 FAM10A7          | 4907        | 13.409        | 1.191         |
| 50074 F23        | M-019213- GTPase, IM          | 155038 GIMAP8           | 5545        | 9.3417        | 5.2583        |
| 50074 G02        | M-015548- chromoson           | 152992 C4orf23          | 5016        | 21.99         | 7.39          |
| 50074 G04        | M-015547- hypothetical        | 152940 FLJ25371         | 4703        | 12.737        | 1.863         |
| <b>50074 G05</b> | <b>M-022738- SET and M</b>    | <b>150572 SMYD1</b>     | <b>5165</b> | <b>34.618</b> | <b>20.018</b> |
| 50074 G06        | M-018772- protein ph          | 152926 PPM1K            | 4375        | 12.137        | 2.463         |
| 50074 G07        | M-027789- hypothetical        | 150577 LOC150577        | 5263        | 17.158        | 2.558         |
| 50074 G08        | M-017948- klotho beta         | 152831 KLB              | 3944        | 10.877        | 3.723         |
| 50074 G09        | M-015472- chromoson           | 150590 C2orf15          | 4581        | 18.38         | 3.78          |
| <b>50074 G10</b> | <b>M-018406- chromoson</b>    | <b>152816 C4orf26</b>   | <b>6292</b> | <b>28.067</b> | <b>13.467</b> |
| 50074 G11        | M-016519- hypothetical        | 150596 FLJ32955         | 4645        | 31.367        | 16.767        |
| 50074 G12        | M-021456- THAP doma           | 152815 THAP6            | 4242        | 17.421        | 2.821         |
| 50074 G13        | M-016520- hypothetical        | 150622 FLJ30594         | 4070        | 19.214        | 4.614         |
| 50074 G14        | M-017067- janus kinas         | 152789 JAKMIP1          | 5291        | 24.759        | 10.159        |
| 50074 G15        | M-016473- otospiralin         | 150677 OTOS             | 5234        | 22.965        | 8.365         |
| 50074 G16        | M-018552- hypothetical        | 152766 MGC24125         | 3768        | 21.975        | 7.375         |
| 50074 G17        | M-015502- myeloma o           | 150678 MYEOV2           | 4868        | 16.044        | 1.444         |
| 50074 G18        | M-015545- hypothetical        | 152756 FLJ31659         | 4328        | 12.361        | 2.239         |
| 50074 G19        | M-007264- copper me           | 150684 COMMD1           | 6343        | 19.849        | 5.249         |
| 50074 G20        | M-028346- hypothetical        | 152742 LOC152742        | 5044        | 16.178        | 1.578         |
| 50074 G21        | M-008551- prominin 2          | 150696 PROM2            | 5507        | 25.277        | 10.677        |
| 50074 G23        | M-023108- ankyrin anc         | 150709 ANKAR            | 3995        | 20.551        | 5.951         |

|           |                         |                  |      |        |        |
|-----------|-------------------------|------------------|------|--------|--------|
| 50074 H02 | M-016855- transmemk     | 160335 TMTC2     | 6322 | 15.074 | 0.474  |
| 50074 H04 | M-018523- chromoson     | 160298 C11orf42  | 4778 | 10.109 | 4.491  |
| 50074 H05 | M-017044- crystallin, g | 155051 CRYGN     | 5381 | 15.926 | 1.326  |
| 50074 H06 | M-008760- lactate deh   | 160287 LDHAL6A   | 5088 | 14.328 | 0.272  |
| 50074 H07 | M-025363- zinc finger   | 155054 ZNF425    | 3323 | 15.919 | 1.319  |
| 50074 H08 | M-016854- chromoson     | 160140 C11orf65  | 5046 | 17.36  | 2.76   |
| 50074 H09 | M-016992- zinc finger   | 155061 ZNF746    | 4856 | 20.84  | 6.24   |
| 50074 H10 | M-008877- expressed i   | 160065 PATE      | 5275 | 12.474 | 2.126  |
| 50074 H11 | M-028869- FLJ45737 p    | 155063 FLJ45737  | 4796 | 12.114 | 2.486  |
| 50074 H12 | M-018584- coiled-coil   | 159989 CCDC67    | 4924 | 23.883 | 9.283  |
| 50074 H13 | M-025369- ATPase, H+    | 155066 ATP6V0E2  | 4043 | 11.897 | 2.703  |
| 50074 H14 | M-007367- solute carri  | 159963 SLC5A12   | 3574 | 12.003 | 2.597  |
| 50074 H15 | M-025400- similar to T  | 155100 LOC155100 | 5600 | 25.982 | 11.382 |
| 50074 H16 | M-026312- chromoson     | 159686 C10orf80  | 5379 | 25.284 | 10.684 |
| 50074 H17 | M-025281- archaemet.    | 155185 AMZ1      | 5092 | 19.462 | 4.862  |
| 50074 H18 | M-018526- chromoson     | 159491 C10orf64  | 5722 | 14.925 | 0.325  |
| 50074 H19 | M-021320- Williams Be   | 155368 WBSCR27   | 4594 | 18.415 | 3.815  |
| 50074 H20 | M-016496- transmemk     | 159371 TMEM20    | 6098 | 28.452 | 13.852 |
| 50074 H21 | M-025253- vacuolar pr   | 155382 VPS37D    | 5608 | 17.101 | 2.501  |
| 50074 H23 | M-017409- NOL1/NOP      | 155400 NSUN5B    | 5176 | 10.896 | 3.704  |
| 50074 I02 | M-018879- zinc finger   | 152687 ZNF595    | 5083 | 9.5219 | 5.0781 |
| 50074 I04 | M-015544- hypothetic    | 152641 FLJ30277  | 5792 | 21.202 | 6.602  |
| 50074 I05 | M-022720- F-box prote   | 150726 FBXO41    | 3918 | 17.407 | 2.807  |
| 50074 I06 | M-018771- sec1 family   | 152579 SCFD2     | 4324 | 11.702 | 2.898  |
| 50074 I07 | M-016521- tetratricop   | 150737 TTC30B    | 4746 | 16.351 | 1.751  |
| 50074 I08 | M-024202- NIPA-like d   | 152519 NPAL1     | 3788 | 16.156 | 1.556  |
| 50074 I09 | M-010302- hypothetic    | 150763 LOC150763 | 4623 | 14.341 | 0.259  |
| 50074 I10 | M-021465- nuclear tra   | 152518 NFXL1     | 5310 | 30.527 | 15.927 |
| 50074 I11 | M-018384- KIAA1754-l    | 150771 KIAA1754L | 2471 | 17.523 | 2.923  |
| 50074 I12 | M-024058- SH3 domai     | 152503 SH3D19    | 3616 | 33.379 | 18.779 |
| 50074 I13 | M-027928- FLJ41352 p    | 150776 FLJ41352  | 4161 | 33.309 | 18.709 |
| 50074 I14 | M-018454- hypothetic    | 152485 LOC152485 | 5051 | 25.302 | 10.702 |
| 50074 I15 | M-022647- family with   | 150946 FAM59B    | 4067 | 13.696 | 0.904  |
| 50074 I16 | M-015543- chromoson     | 152405 C3orf30   | 4373 | 27.19  | 12.59  |
| 50074 I17 | M-015635- hypothetic    | 150962 FLJ32312  | 4666 | 31.547 | 16.947 |
| 50074 I18 | M-010688- immunogl      | 152404 IGSF11    | 5631 | 12.698 | 1.902  |
| 50074 I19 | M-016522- hypothetic    | 151009 FLJ38359  | 6457 | 24.609 | 10.009 |
| 50074 I20 | M-019199- contactin 4   | 152330 CNTN4     | 5227 | 18.251 | 3.651  |
| 50074 I21 | M-017363- septin 10     | 151011 SEPT10    | 5479 | 32.342 | 17.742 |
| 50074 I23 | M-016151- hypothetic    | 151050 FLJ23861  | 5324 | 9.5229 | 5.0771 |
| 50074 J02 | M-016853- ubiquitin s   | 159195 USP54     | 4003 | 8.1939 | 6.4061 |
| 50074 J04 | M-021458- RNA bindin    | 159163 RBMY1F    | 6201 | 18.755 | 4.155  |
| 50074 J05 | M-028751- RNA bindin    | 155435 RBM33     | 5052 | 15.697 | 1.097  |
| 50074 J06 | M-016594- family with   | 159091 FAM122C   | 4666 | 11.659 | 2.941  |
| 50074 J07 | M-010689- anterior gr   | 155465 AGR3      | 4879 | 13.609 | 0.991  |
| 50074 J08 | M-016085- family with   | 159090 FAM122B   | 4688 | 12.713 | 1.887  |
| 50074 J09 | M-029312- hypothetic    | 157273 LOC157273 | 3871 | 8.1374 | 6.4626 |

|           |                         |                  |      |        |         |
|-----------|-------------------------|------------------|------|--------|---------|
| 50074 J10 | M-016693- chromoson     | 159013 CXorf38   | 4836 | 10.753 | 3.847   |
| 50074 J11 | M-029292- hypothetic    | 157278 LOC157278 | 3789 | 17.604 | 3.004   |
| 50074 J12 | M-024783- H2B histon    | 158983 H2BFWT    | 4714 | 12.049 | 2.551   |
| 50074 J13 | M-017036- phosphatid    | 157310 PEBP4     | 3269 | 13.888 | 0.712   |
| 50074 J14 | M-017040- armadillo r   | 158947 ARMCX4    | 4600 | 10.326 | 4.274   |
| 50074 J15 | M-025787- cell divisior | 157313 CDCA2     | 5166 | 13.086 | 1.514   |
| 50074 J16 | M-032247- ubiquitin sp  | 158880 USP51     | 3667 | 2.9179 | 11.6821 |
| 50074 J17 | M-018907- chromoson     | 157376 C8orf78   | 4452 | 11.321 | 3.279   |
| 50074 J18 | M-016172- zinc finger,  | 158866 ZDHC15    | 4380 | 19.68  | 5.08    |
| 50074 J19 | M-019155- transmemk     | 157378 TMEM65    | 6473 | 21.489 | 6.889   |
| 50074 J20 | M-021328- cancer/test   | 158852 CT45-2    | 6681 | 14.339 | 0.261   |
| 50074 J21 | M-010008- retinol deh   | 157506 RDH10     | 5415 | 8.7535 | 5.8465  |
| 50074 J23 | M-025934- family with   | 157530 FAM10A6   | 5351 | 7.7742 | 6.8258  |
| 50074 K02 | M-028076- hypothetic    | 152274 LOC152274 | 5494 | 13.797 | 0.803   |
| 50074 K04 | M-028077- FYVE, RhoG    | 152273 FGD5      | 4155 | 18.556 | 3.956   |
| 50074 K05 | M-008684- phospholip    | 151056 PLB1      | 2864 | 19.797 | 5.197   |
| 50074 K06 | M-028143- hypothetic    | 152225 LOC152225 | 4192 | 23.497 | 8.897   |
| 50074 K07 | M-007142- zinc finger,  | 151112 ZSWIM2    | 5439 | 18.165 | 3.565   |
| 50074 K08 | M-017063- coiled-coil   | 152206 CCDC13    | 3713 | 25.236 | 10.636  |
| 50074 K09 | M-027954- hypothetic    | 151121 LOC151121 | 4372 | 20.334 | 5.734   |
| 50074 K10 | M-019317- nudix (nucl   | 152195 NUDT16P   | 3946 | 18.931 | 4.331   |
| 50074 K11 | M-027967- hypothetic    | 151171 LOC151171 | 3732 | 11.254 | 3.346   |
| 50074 K12 | M-010755- CKLF-like N   | 152189 CMTM8     | 3887 | 15.693 | 1.093   |
| 50074 K13 | M-022974- hypothetic    | 151174 LOC151174 | 3536 | 16.431 | 1.831   |
| 50074 K14 | M-017060- coiled-coil   | 152185 CCDC52    | 3286 | 12.203 | 2.397   |
| 50074 K15 | M-022967- family with   | 151176 FAM132B   | 4324 | 13.784 | 0.816   |
| 50074 K16 | M-017781- coiled-coil   | 152137 CCDC50    | 5017 | 20.949 | 6.349   |
| 50074 K17 | M-016152- ADP-ribosy    | 151188 ARL6IP6   | 4439 | 15.431 | 0.831   |
| 50074 K18 | M-018794- hypothetic    | 152100 MGC61571  | 4815 | 10.758 | 3.842   |
| 50074 K19 | M-018481- family with   | 151194 FAM119A   | 6639 | 11.026 | 3.574   |
| 50074 K20 | M-028086- zinc finger,  | 152098 ZCWPW2    | 5926 | 19.102 | 4.502   |
| 50074 K21 | M-016153- cyclin Y-like | 151195 CCNYL1    | 6146 | 7.3706 | 7.2294  |
| 50074 K23 | M-015647- kelch-like 2  | 151230 KLHL23    | 5015 | 8.4546 | 6.1454  |
| 50074 L02 | M-027188- diacylglyce   | 158835 DGAT2L4   | 6314 | 16.693 | 2.093   |
| 50074 L04 | M-010304- diacylglyce   | 158833 DGAT2L3   | 5084 | 14.477 | 0.123   |
| 50074 L05 | M-025925- ankyrin rep   | 157567 ANKRD46   | 3732 | 40.059 | 25.459  |
| 50074 L06 | M-019273- melanoma      | 158809 MAGEB6    | 4048 | 14.6   | 0       |
| 50074 L07 | M-025788- establishm    | 157570 ESCO2     | 4304 | 22.514 | 7.914   |
| 50074 L08 | M-018527- chromoson     | 158801 CXorf42   | 4583 | 21.907 | 7.307   |
| 50074 L09 | M-017447- F-box prote   | 157574 FBXO16    | 3874 | 11.874 | 2.726   |
| 50074 L10 | M-017005- paired-like   | 158800 OTEX      | 4960 | 17.762 | 3.162   |
| 50074 L11 | M-010690- family with   | 157638 FAM84B    | 3435 | 28.093 | 13.493  |
| 50074 L12 | M-017018- RIB43A dor    | 158787 RIBC1     | 3699 | 26.169 | 11.569  |
| 50074 L13 | M-017967- chromoson     | 157657 C8orf37   | 4116 | 35.398 | 20.798  |
| 50074 L14 | M-008446- hypothetic    | 158763 RP13-102H | 4731 | 12.915 | 1.685   |
| 50074 L15 | M-012873- vacuolar pr   | 157680 VPS13B    | 4132 | 24.637 | 10.037  |
| 50074 L16 | M-017039- motile sper   | 158747 MOSPD2    | 4867 | 19.006 | 4.406   |



|                  |                             |                         |             |               |               |
|------------------|-----------------------------|-------------------------|-------------|---------------|---------------|
| 50074 L17        | M-029254- family with       | 157693 FAM87A           | 2605        | 17.927        | 3.327         |
| 50074 L18        | M-031758- family with       | 158724 FAM47A           | 4794        | 21.026        | 6.426         |
| 50074 L19        | M-018027- chromosom         | 157695 C8orf42          | 5613        | 21.824        | 7.224         |
| 50074 L20        | M-017038- hypothetic        | 158722 FLJ32742         | 5748        | 33.751        | 19.151        |
| 50074 L21        | M-025827- glutamate-        | 157697 ERICH1           | 6176        | 19.883        | 5.283         |
| 50074 L23        | M-007613- solute carri      | 157724 SLC7A13          | 4941        | 21.959        | 7.359         |
| 50074 M02        | M-028190- chromosom         | 152078 C3orf55          | 4478        | 8.084         | 6.516         |
| 50074 M04        | M-016066- chromosom         | 152065 C3orf22          | 3053        | 21.389        | 6.789         |
| 50074 M05        | M-023104- protein phc       | 151242 PPP1R1C          | 4548        | 13.171        | 1.429         |
| 50074 M06        | M-015460- fibronectin       | 152028 FNDC6            | 4190        | 17.685        | 3.085         |
| 50074 M07        | M-016154- shugoshin-        | 151246 SGOL2            | 3298        | 17.253        | 2.653         |
| 50074 M08        | M-028084- hypothetic        | 152024 LOC152024        | 4520        | 22.721        | 8.121         |
| 50074 M09        | M-018770- amyotroph         | 151254 ALS2CR11         | 2251        | 16.482        | 1.882         |
| 50074 M10        | M-016824- chromosom         | 152007 C9orf19          | 3943        | 20.314        | 5.714         |
| 50074 M11        | M-007336- hypothetic        | 151258 FLJ39822         | 3227        | 14.379        | 0.221         |
| 50074 M12        | M-018789- chromosom         | 152002 C3orf21          | 2773        | 11.323        | 3.277         |
| 50074 M13        | M-016155- hypothetic        | 151278 FLJ32447         | 3913        | 16.56         | 1.96          |
| 50074 M14        | M-018391- chromosom         | 151963 C3orf59          | 3663        | 9.4458        | 5.1542        |
| 50074 M15        | M-007463- solute carri      | 151295 SLC23A3          | 2825        | 22.053        | 7.453         |
| 50074 M16        | M-015455- coiled-coil       | 151903 CCDC12           | 3722        | 16.228        | 1.628         |
| <b>50074 M17</b> | <b>M-028016- hypothetic</b> | <b>151300 LOC15130C</b> | <b>5663</b> | <b>31.785</b> | <b>17.185</b> |
| 50074 M18        | M-018893- B and T lym       | 151888 BTLA             | 4898        | 21.641        | 7.041         |
| 50074 M19        | M-027825- myeloid-as        | 151325 MYADML           | 6176        | 21.454        | 6.854         |
| 50074 M20        | M-018258- coiled-coil       | 151887 CCDC80           | 5359        | 15.171        | 0.571         |
| 50074 M21        | M-015929- family with       | 151354 FAM84A           | 5363        | 16.782        | 2.182         |
| 50074 M23        | M-015588- family with       | 151393 FAM82A           | 5198        | 9.2536        | 5.3464        |
| 50074 N02        | M-018774- hypothetic        | 158696 FLJ30672         | 3398        | 15.774        | 1.174         |
| 50074 N04        | M-017796- fatty acid a      | 158584 FAAH2            | 2925        | 12.752        | 1.848         |
| 50074 N05        | M-015923- transmemk         | 157753 TMEM74           | 2672        | 10.928        | 3.672         |
| 50074 N06        | M-031531- hypothetic        | 158572 LOC158572        | 3503        | 17.157        | 2.557         |
| 50074 N07        | M-017034- family with       | 157769 FAM91A1          | 3443        | 15.452        | 0.852         |
| 50074 N08        | M-016772- fragile X m       | 158521 FMR1NB           | 4230        | 12.979        | 1.621         |
| 50074 N09        | M-018544- chromosom         | 157777 C8orf45          | 3332        | 9.2137        | 5.3863        |
| 50074 N10        | M-007148- zinc finger       | 158506 ZNF645           | 3308        | 14.601        | 0.001         |
| 50074 N11        | M-018542- hypothetic        | 157807 MGC34646         | 2633        | 9.1531        | 5.4469        |
| 50074 N12        | M-016593- prune hom         | 158471 PRUNE2           | 3822        | 11.224        | 3.376         |
| 50074 N13        | M-015925- NK6 transc        | 157848 NKX6-3           | 3694        | 15.945        | 1.345         |
| 50074 N14        | M-018284- chromosom         | 158427 C9orf97          | 3776        | 10.805        | 3.795         |
| 50074 N15        | M-016495- RPE-spondi        | 157869 RPESP            | 4563        | 14.639        | 0.039         |
| 50074 N16        | M-029606- KIAA1958          | 158405 KIAA1958         | 4146        | 9.3825        | 5.2175        |
| 50074 N17        | M-025989- calmodulin        | 157922 CAMSAP1          | 3898        | 18.881        | 4.281         |
| 50074 N18        | M-018530- chromosom         | 158401 C9orf84          | 4271        | 14.282        | 0.318         |
| 50074 N19        | M-018532- chromosom         | 157927 C9orf62          | 3985        | 21.782        | 7.182         |
| 50074 N20        | M-026189- zinc finger       | 158399 ZNF483           | 5034        | 14.025        | 0.575         |
| 50074 N21        | M-015926- chromosom         | 157983 C9orf66          | 4286        | 9.8227        | 4.7773        |
| 50074 N23        | M-029541- chromosom         | 158035 C9orf14          | 5522        | 12.532        | 2.068         |
| 50074 O02        | M-028116- hypothetic        | 151877 LOC151877        | 3762        | 8.5327        | 6.0673        |

|           |                        |                  |        |         |         |
|-----------|------------------------|------------------|--------|---------|---------|
| 50074 O04 | M-018977- developme    | 151871 DPPA2     | 2852   | 13.78   | 0.82    |
| 50074 O05 | M-019401- growth diff  | 151449 GDF7      | 3919   | 13.243  | 1.357   |
| 50074 O06 | M-017582- copine fam   | 151835 CPNE9     | 4065   | 13.53   | 1.07    |
| 50074 O07 | M-016156- solute carri | 151473 SLC16A14  | 3657   | 14.356  | 0.244   |
| 50074 O08 | M-016744- leucine ric  | 151827 LRRC34    | 3533   | 23.917  | 9.317   |
| 50074 O09 | M-018549- chromoson    | 151477 C2orf52   | 3804   | 21.504  | 6.904   |
| 50074 O10 | M-018465- WD repeat    | 151790 WDR49     | 3611   | 14.567  | 0.033   |
| 50074 O11 | M-028022- hypothetic   | 151484 LOC151484 | 4427   | 14.344  | 0.256   |
| 50074 O12 | M-028144- hypothetic   | 151658 LOC151658 | 3115   | 16.95   | 2.35    |
| 50074 O13 | M-016064- skin aspart  | 151516 SASP      | 3244   | 7.3366  | 7.2634  |
| 50074 O14 | M-018853- EF-hand do   | 151651 EFHB      | 4091   | 12.784  | 1.816   |
| 50074 O15 | M-007203- WD repeat    | 151525 WDSUB1    | 4261   | 28.303  | 13.703  |
| 50074 O16 | M-015501- chromoson    | 151649 C3orf48   | 5268   | 25.494  | 10.894  |
| 50074 O17 | M-006646- uridine phc  | 151531 UPP2      | 4613   | 10.666  | 3.934   |
| 50074 O18 | M-015475- shugoshin-   | 151648 SGOL1     | 3461   | 7.7434  | 6.8566  |
| 50074 O19 | M-015474- hypothetic   | 151534 LOC151534 | 7093   | 34.597  | 19.997  |
| 50074 O20 | M-018777- family with  | 151647 FAM19A4   | 5637   | 15.629  | 1.029   |
| 50074 O21 | M-015350- tetratricop  | 151613 TTC14     | 6744   | 16.34   | 1.74    |
| 50074 O23 | M-007143- deltex 3-lik | 151636 DTX3L     | 5683   | 10.523  | 4.077   |
| 50074 P02 | M-029548- hypothetic   | 158381 LOC158381 | 4343   | 13.723  | 0.877   |
| 50074 P04 | M-029552- hypothetic   | 158376 LOC158376 | 3529   | 12.383  | 2.217   |
| 50074 P05 | M-015927- leucine ric  | 158038 LINGO2    | 2005   | 13.566  | 1.034   |
| 50074 P06 | M-026111- KIAA2026     | 158358 KIAA2026  | 3541   | 12.68   | 1.92    |
| 50074 P07 | M-016081- chromoson    | 158046 C9orf121  | 3087   | 7.5478  | 7.0522  |
| 50074 P08 | M-017026- FRAS1 relai  | 158326 FREM1     | 2260   | 13.894  | 0.706   |
| 50074 P09 | M-016767- chromoson    | 158055 C9orf163  | 2496   | 21.635  | 7.035   |
| 50074 P10 | M-029616- chromoson    | 158314 C9orf44   | 4013   | 15.873  | 1.273   |
| 50074 P11 | M-032232- lipocalin 6  | 158062 LCN6      | 2669   | 15.024  | 0.424   |
| 50074 P12 | M-016747- chromoson    | 158297 C9orf138  | 2769   | 16.071  | 1.471   |
| 50074 P13 | M-026203- olfactory re | 158131 OR1Q1     | 3304   | 15.345  | 0.745   |
| 50074 P14 | M-027289- family with  | 158293 FAM120AC  | 2094   | 6.9723  | 7.6277  |
| 50074 P15 | M-016360- tubulin tyrc | 158135 TTLL11    | 3355   | 11.863  | 2.737   |
| 50074 P16 | M-017031- tetratricop  | 158248 TTC16     | 4558   | 13.142  | 1.458   |
| 50074 P17 | M-016768- RAS and EF   | 158158 RASEF     | 4274   | 15.746  | 1.146   |
| 50074 P18 | M-017032- RNA (guani   | 158234 RG9MTD3   | 2667   | 12.111  | 2.489   |
| 50074 P19 | M-009534- hydroxyste   | 158160 HSD17B7P  | 3948   | 11.93   | 2.67    |
| 50074 P20 | M-029558- chromoson    | 158228 C9orf122  | 3121   | 9.3239  | 5.2761  |
| 50074 P21 | M-016769- chromoson    | 158219 C9orf52   | 3585   | 7.5593  | 7.0407  |
| 50074 P23 | M-017982- hypothetic   | 150759 LOC150759 | 4671   | 22.286  | 7.686   |
|           |                        | MAD              | 4560.5 | 14.6005 | 3.688   |
|           |                        | MAD3             |        |         | 11.064  |
|           |                        | MADc             |        |         | 5.45824 |
| 50074 C22 |                        |                  | 5272   | 38.771  |         |
| 50074 D22 |                        |                  | 6704   | 49.329  |         |
| 50074 E22 |                        |                  | 6129   | 54.936  |         |
| 50074 F22 |                        |                  | 5888   | 50.747  |         |

|           |  |           |          |          |
|-----------|--|-----------|----------|----------|
|           |  | mn        | 5998.25  | 48.44575 |
|           |  | sd        | 592.951  | 6.875076 |
| 50074 G22 |  |           | 2445     | 11.779   |
| 50074 H22 |  |           | 3004     | 12.284   |
| 50074 I22 |  |           | 2722     | 11.866   |
| 50074 J22 |  |           | 3207     | 8.0449   |
|           |  | mn        | 2844.5   | 10.99348 |
|           |  | sd        | 332.3918 | 1.978038 |
|           |  | 3psSD     |          | 5.934113 |
|           |  | 3ngSD     |          | 20.62523 |
|           |  | SumSD     |          | 26.55934 |
|           |  | DiffMn    |          | 37.45228 |
|           |  | SmovrDiff |          | 0.709152 |
|           |  | 1minus    |          | 0.290848 |

|           |                                    |                |      |        |
|-----------|------------------------------------|----------------|------|--------|
| 50074 G03 | M-003290- polo-like ki             | 5347 PLK1 SMAR | 1113 | 22.911 |
| 50074 H03 | M-003290- polo-like ki             | 5347 PLK1 SMAR | 1350 | 10.074 |
| 50074 I03 | D-001206-: siControl non-targetinç |                | 4270 | 18.103 |
| 50074 J03 | D-001206-: siControl non-targetinç |                | 3728 | 10.756 |
| 50074 K03 | D-001600-( siGLO RISC-free siRNA   |                | 6181 | 25.627 |
| 50074 L03 | D-001600-( siGLO RISC-free siRNA   |                | 6591 | 27.31  |



| rZ              | cell ct     | % inf         | AD            | rZ              | cell ct     | % inf         | AD            | rZ              |
|-----------------|-------------|---------------|---------------|-----------------|-------------|---------------|---------------|-----------------|
| -0.02244        | 4576        | 13.265        | 1.545         | 0.29625         | 4193        | 9.2774        | 0.8826        | -0.18716        |
| 0.260615        | 2121        | 7.6851        | 4.0349        | -0.77437        | 1897        | 8.1708        | 1.9892        | -0.42235        |
| -0.19558        | 2369        | 11.186        | 0.534         | -0.10265        | 2896        | 11.464        | 1.304         | 0.277569        |
| -0.39399        | 3536        | 7.9468        | 3.7732        | -0.72416        | 3768        | 14.278        | 4.118         | 0.875638        |
| 2.124769        | 2642        | 18.925        | 7.205         | 1.382243        | 3252        | 14.453        | 4.293         | 0.912831        |
| -0.62447        | 3653        | 16.808        | 5.088         | 0.976051        | 3155        | 14.358        | 4.198         | 0.89264         |
| -0.08785        | 3455        | 14.298        | 2.578         | 0.494453        | 3910        | 13.836        | 3.676         | 0.781698        |
| -0.17671        | 4153        | 17.602        | 5.882         | 1.128397        | 4480        | 18.103        | 7.943         | 1.688578        |
| 0.111849        | 3019        | 13.448        | 1.728         | 0.331362        | 3886        | 15.697        | 5.537         | 1.177223        |
| -1.02535        | 2807        | 16.316        | 4.596         | 0.88165         | 2890        | 6.8858        | 3.2742        | -0.69545        |
| <b>1.535202</b> | <b>3280</b> | <b>28.902</b> | <b>17.182</b> | <b>3.296545</b> | <b>4080</b> | <b>23.039</b> | <b>12.879</b> | <b>2.737643</b> |
| 0.461596        | 2742        | 15.208        | 3.488         | 0.669056        | 2629        | 16.736        | 6.576         | 1.398045        |
| -1.04642        | 3357        | 7.8344        | 3.8856        | -0.74573        | 2379        | 8.1547        | 2.0053        | -0.42577        |
| -1.03612        | 4412        | 8.6582        | 3.0618        | -0.58766        | 3688        | 7.7007        | 2.4593        | -0.52226        |
| 0.139331        | 4188        | 11.772        | 0.052         | 0.009785        | 2797        | 11.369        | 1.209         | 0.257378        |
| -0.76939        | 3154        | 14.933        | 3.213         | 0.616291        | 2406        | 12.095        | 1.935         | 0.411677        |
| -0.64444        | 3951        | 8.8585        | 2.8615        | -0.54923        | 2052        | 13.986        | 3.826         | 0.813578        |
| 0.58343         | 5542        | 15.716        | 3.996         | 0.766527        | 2875        | 13.913        | 3.753         | 0.798063        |
| 0.095177        | 4577        | 7.2537        | 4.4663        | -0.85715        | 2015        | 10.025        | 0.135         | -0.02827        |
| -1.50014        | 3220        | 4.8137        | 6.9063        | -1.32531        | 2742        | 9.7009        | 0.4591        | -0.09715        |
| -0.72963        | 4209        | 10.145        | 1.575         | -0.30239        | 3269        | 3.4261        | 6.7339        | -1.43075        |
| 0.178721        | 4683        | 18.065        | 6.345         | 1.217233        | 4279        | 12.106        | 1.946         | 0.414015        |
| -0.04699        | 5435        | 14.351        | 2.631         | 0.504622        | 4893        | 8.6246        | 1.5354        | -0.3259         |
| -0.96042        | 3315        | 4.6456        | 7.0744        | -1.35757        | 3627        | 4.6044        | 5.5556        | -1.18033        |
| -0.39747        | 2745        | 8.0146        | 3.7054        | -0.71115        | 3650        | 7.0959        | 3.0641        | -0.6508         |
| 0.023909        | 3326        | 10.583        | 1.137         | -0.21835        | 3823        | 8.8412        | 1.3188        | -0.27986        |
| 0.338479        | 4276        | 14.687        | 2.967         | 0.569091        | 3829        | 8.8274        | 1.3326        | -0.2828         |
| -1.29025        | 2621        | 10.263        | 1.457         | -0.27975        | 3706        | 7.7442        | 2.4158        | -0.51301        |
| <b>1.780153</b> | <b>3720</b> | <b>32.097</b> | <b>20.377</b> | <b>3.909575</b> | <b>4027</b> | <b>25.925</b> | <b>15.765</b> | <b>3.351015</b> |
| -0.73146        | 4308        | 13.347        | 1.627         | 0.311983        | 3580        | 8.2123        | 1.9477        | -0.41353        |
| -0.74191        | 3934        | 15.125        | 3.405         | 0.653131        | 2761        | 7.0989        | 3.0611        | -0.65016        |
| -0.11808        | 4542        | 15.808        | 4.088         | 0.784179        | 3635        | 11.829        | 1.669         | 0.355143        |
| -0.9932         | 4103        | 13.649        | 1.929         | 0.369928        | 3558        | 12.844        | 2.684         | 0.570865        |
| -0.91198        | 3649        | 19.211        | 7.491         | 1.437118        | 5915        | 12.883        | 2.723         | 0.579154        |
| -0.86513        | 4308        | 9.6797        | 2.0403        | -0.39167        | 4266        | 8.0403        | 2.1197        | -0.45008        |
| -0.98924        | 4352        | 7.3529        | 4.3671        | -0.83811        | 4469        | 7.1604        | 2.9996        | -0.63709        |
| -1.07148        | 4617        | 2.7724        | 8.9476        | -1.71698        | 4401        | 7.0893        | 3.0707        | -0.6522         |
| -0.20272        | 5232        | 9.6713        | 2.0487        | -0.39328        | 3811        | 8.1606        | 1.9994        | -0.42451        |
| -0.04608        | 5619        | 8.845         | 2.875         | -0.55182        | 3544        | 11.512        | 1.352         | 0.28777         |
| 0.340311        | 5202        | 11.438        | 0.282         | -0.0543         | 3399        | 11.209        | 1.049         | 0.223373        |
| -0.31393        | 5933        | 11.748        | 0.028         | 0.005181        | 5755        | 6.0643        | 4.0957        | -0.87005        |
| 0.398022        | 4866        | 13.152        | 1.432         | 0.274568        | 3222        | 5.3383        | 4.8217        | -1.02435        |
| 0.173957        | 4750        | 15.874        | 4.154         | 0.796843        | 6025        | 8.2656        | 1.8944        | -0.4022         |
| -0.58838        | 4371        | 8.0073        | 3.7127        | -0.71255        | 6166        | 6.2277        | 3.9323        | -0.83532        |
| -0.78954        | 3952        | 11.943        | 0.223         | 0.042595        | 5667        | 8.4877        | 1.6723        | -0.35499        |
| -1.20946        | 3164        | 13.496        | 1.776         | 0.340572        | 4613        | 6.6551        | 3.5049        | -0.74448        |

|                 |             |               |               |                 |             |               |              |                 |
|-----------------|-------------|---------------|---------------|-----------------|-------------|---------------|--------------|-----------------|
| -1.40802        | 3725        | 15.275        | 3.555         | 0.681912        | 5301        | 7.4137        | 2.7463       | -0.58326        |
| -1.00785        | 4350        | 13.287        | 1.567         | 0.300471        | 6229        | 12.233        | 2.073        | 0.441007        |
| -1.7235         | 3647        | 13.957        | 2.237         | 0.429025        | 4920        | 4.5122        | 5.6478       | -1.19992        |
| -0.52096        | 2262        | 14.943        | 3.223         | 0.61821         | 2155        | 4.6404        | 5.5196       | -1.17267        |
| -1.98863        | 2173        | 4.4639        | 7.2561        | -1.39243        | 2285        | 4.1575        | 6.0025       | -1.27531        |
| -1.02038        | 3299        | 10.549        | 1.171         | -0.22487        | 3787        | 4.8323        | 5.3277       | -1.13189        |
| -0.23002        | 3672        | 17.947        | 6.227         | 1.194592        | 4113        | 7.1967        | 2.9633       | -0.62938        |
| -1.21479        | 3660        | 12.869        | 1.149         | 0.220269        | 4753        | 12.687        | 2.527        | 0.537497        |
| -1.67254        | 4735        | 12.313        | 0.593         | 0.113588        | 4382        | 8.8544        | 1.3056       | -0.27706        |
| -1.9296         | 4976        | 7.496         | 4.224         | -0.81066        | 4890        | 8.1391        | 2.0209       | -0.42908        |
| -0.07356        | 5081        | 12.458        | 0.738         | 0.141409        | 5549        | 13.516        | 3.356        | 0.713687        |
| -1.03359        | 4665        | 11.211        | 0.509         | -0.09785        | 6258        | 11.649        | 1.489        | 0.316887        |
| -0.72468        | 5829        | 8.8523        | 2.8677        | -0.55042        | 5147        | 11.172        | 1.012        | 0.215509        |
| -1.90959        | 5558        | 8.3303        | 3.3897        | -0.65058        | 3896        | 6.4682        | 3.6918       | -0.78421        |
| -1.93053        | 5894        | 4.6827        | 7.0373        | -1.35045        | 4588        | 2.354         | 7.806        | -1.65861        |
| 0.100857        | 5522        | 14.524        | 2.804         | 0.537816        | 5208        | 7.0469        | 3.1131       | -0.66121        |
| -0.78679        | 5529        | 5.8419        | 5.8781        | -1.12803        | 4161        | 3.4847        | 6.6753       | -1.4183         |
| -2.04227        | 3303        | 7.2056        | 4.5144        | -0.86638        | 3286        | 1.7346        | 8.4254       | -1.79025        |
| -0.61732        | 4538        | 12.561        | 0.841         | 0.161172        | 4701        | 4.6373        | 5.5227       | -1.17333        |
| <b>2.622915</b> | <b>2984</b> | <b>26.173</b> | <b>14.453</b> | <b>2.772928</b> | <b>3289</b> | <b>18.334</b> | <b>8.174</b> | <b>1.737673</b> |
| -0.37219        | 3497        | 15.642        | 3.922         | 0.752328        | 4877        | 9.268         | 0.892        | -0.18915        |
| 0.185316        | 4591        | 31.932        | 20.212        | 3.877916        | 5302        | 11.411        | 1.251        | 0.266304        |
| -1.04891        | 2122        | 13.713        | 1.993         | 0.382208        | 3306        | 3.6298        | 6.5302       | -1.38746        |
| -1.58084        | 3234        | 7.2356        | 4.4844        | -0.86062        | 3150        | 3.3333        | 6.8267       | -1.45048        |
| <b>2.756841</b> | <b>2999</b> | <b>34.812</b> | <b>23.092</b> | <b>4.430506</b> | <b>3709</b> | <b>10.38</b>  | <b>0.22</b>  | <b>0.047182</b> |
| 0.857328        | 3019        | 15.502        | 3.782         | 0.725466        | 4873        | 9.3987        | 0.7613       | -0.16138        |
| 0.097559        | 2825        | 9.3097        | 2.4103        | -0.46266        | 4121        | 9.6336        | 0.5264       | -0.11145        |
| 0.014016        | 3786        | 14.474        | 2.754         | 0.528222        | 6186        | 9.3598        | 0.8002       | -0.16964        |
| 0.554116        | 3447        | 12.765        | 1.045         | 0.200314        | 4206        | 6.4432        | 3.7168       | -0.78952        |
| 0.943253        | 4435        | 15.829        | 4.109         | 0.788208        | 6022        | 12.803        | 2.643        | 0.562151        |
| -1.12223        | 3418        | 6.5828        | 5.1372        | -0.98587        | 4951        | 4.8071        | 5.3529       | -1.13725        |
| <b>2.539188</b> | <b>4813</b> | <b>23.416</b> | <b>11.696</b> | <b>2.243938</b> | <b>5595</b> | <b>11.367</b> | <b>1.207</b> | <b>0.256953</b> |
| -0.08547        | 4432        | 19.743        | 8.023         | 1.539194        | 3876        | 12.564        | 2.404        | 0.511355        |
| -1.47309        | 4457        | 6.6861        | 5.0339        | -0.96605        | 3288        | 5.292         | 4.868        | -1.03419        |
| -0.54312        | 3463        | 3.5807        | 8.1393        | -1.56189        | 3060        | 3.1046        | 7.0554       | -1.49908        |
| 0.413045        | 3491        | 8.88          | 2.84          | -0.54511        | 2612        | 10.72         | 0.56         | 0.119444        |
| 0.43558         | 5463        | 13.088        | 1.368         | 0.262288        | 4590        | 12.68         | 2.52         | 0.536009        |
| 0.124857        | 4291        | 13.051        | 1.331         | 0.255189        | 4069        | 7.0042        | 3.1558       | -0.67029        |
| 0.237714        | 3537        | 18.858        | 7.138         | 1.369387        | 6260        | 17.396        | 7.236        | 1.538317        |
| -0.40517        | 2831        | 13.387        | 1.667         | 0.319658        | 3323        | 9.5697        | 0.5903       | -0.12503        |
| 0.223973        | 3958        | 15.589        | 3.869         | 0.742159        | 4644        | 11.606        | 1.446        | 0.307748        |
| 0.517841        | 4755        | 17.182        | 5.462         | 1.047811        | 4441        | 10.763        | 0.603        | 0.128583        |
| 0.537444        | 3491        | 15.755        | 4.035         | 0.77401         | 4196        | 8.1268        | 2.0332       | -0.4317         |
| <b>2.245687</b> | <b>3291</b> | <b>28.38</b>  | <b>16.66</b>  | <b>3.196388</b> | <b>4542</b> | <b>19.771</b> | <b>9.611</b> | <b>2.043084</b> |
| -0.87459        | 3615        | 7.6349        | 4.0851        | -0.78401        | 3483        | 7.0055        | 3.1545       | -0.67001        |
| 0.699951        | 3526        | 14.209        | 2.489         | 0.477376        | 5027        | 10.066        | 0.094        | -0.01955        |
| <b>4.068619</b> | <b>4214</b> | <b>24.205</b> | <b>12.485</b> | <b>2.395324</b> | <b>5699</b> | <b>25.18</b>  | <b>15.02</b> | <b>3.192677</b> |

|                 |             |               |               |                 |             |               |               |                 |
|-----------------|-------------|---------------|---------------|-----------------|-------------|---------------|---------------|-----------------|
| 0.172125        | 4583        | 17.412        | 5.692         | 1.091941        | 6151        | 11.071        | 0.911         | 0.194043        |
| -0.0175         | 3826        | 10.063        | 1.657         | -0.31812        | 4704        | 6.7602        | 3.3998        | -0.72215        |
| -0.48358        | 3400        | 8.0294        | 3.6906        | -0.70831        | 4428        | 5.3523        | 4.8077        | -1.02137        |
| -1.3536         | 5245        | 7.6072        | 4.1128        | -0.78932        | 4564        | 2.6731        | 7.4869        | -1.59079        |
| 1.16457         | 5865        | 15.891        | 4.171         | 0.800104        | 5621        | 10.639        | 0.479         | 0.102229        |
| 1.261121        | 6310        | 16.735        | 5.015         | 0.962044        | 5548        | 14.311        | 4.151         | 0.882651        |
| <b>4.078696</b> | <b>3526</b> | <b>26.858</b> | <b>15.138</b> | <b>2.90436</b>  | <b>2920</b> | <b>27.329</b> | <b>17.169</b> | <b>3.649412</b> |
| 0.275089        | 4863        | 12.564        | 0.844         | 0.161748        | 5237        | 12.755        | 2.595         | 0.551949        |
| 1.152661        | 5434        | 19.746        | 8.026         | 1.539769        | 5013        | 17.814        | 7.654         | 1.627156        |
| 1.036873        | 3926        | 11.437        | 0.283         | -0.05449        | 4836        | 17.639        | 7.479         | 1.589963        |
| 0.853297        | 5794        | 14.187        | 2.467         | 0.473155        | 6575        | 14.692        | 4.532         | 0.963627        |
| -0.24174        | 3940        | 5.736         | 5.984         | -1.14835        | 4701        | 7.4665        | 2.6935        | -0.57203        |
| -0.71387        | 3780        | 3.8889        | 7.8311        | -1.50276        | 4599        | 7.98          | 2.18          | -0.4629         |
| 0.424587        | 3224        | 16.222        | 4.502         | 0.863614        | 4471        | 15.366        | 5.206         | 1.106874        |
| <b>1.481522</b> | <b>3924</b> | <b>22.426</b> | <b>10.706</b> | <b>2.053985</b> | <b>4893</b> | <b>22.849</b> | <b>12.689</b> | <b>2.697262</b> |
| -0.55595        | 2955        | 10.491        | 1.229         | -0.236          | 3175        | 10.898        | 0.738         | 0.157275        |
| -0.40663        | 3278        | 9.7926        | 1.9274        | -0.37001        | 4123        | 10.017        | 0.143         | -0.02997        |
| -1.22481        | 3145        | 3.2114        | 8.5086        | -1.63275        | 3266        | 5.1745        | 4.9855        | -1.05916        |
| -0.52114        | 3685        | 13.433        | 1.713         | 0.328484        | 4077        | 12.117        | 1.957         | 0.416353        |
| -0.14263        | 3285        | 10.137        | 1.583         | -0.30392        | 4315        | 13.465        | 3.305         | 0.702848        |
| 0.615675        | 3630        | 16.97         | 5.25          | 1.007134        | 5552        | 17.813        | 7.653         | 1.626943        |
| -0.87453        | 3700        | 8.4324        | 3.2876        | -0.63099        | 5237        | 10.483        | 0.323         | 0.069073        |
| -0.82545        | 3433        | 7.3696        | 4.3504        | -0.83491        | 5912        | 9.5568        | 0.6032        | -0.12778        |
| -0.59112        | 3775        | 6.8079        | 4.9121        | -0.94268        | 4160        | 9.6154        | 0.5446        | -0.11532        |
| 0.561078        | 5323        | 11.929        | 0.209         | 0.039909        | 4712        | 15.004        | 4.844         | 1.029937        |
| -0.21829        | 4456        | 6.1041        | 5.6159        | -1.07772        | 4313        | 9.6684        | 0.4916        | -0.10406        |
| -0.96346        | 4654        | 5.2213        | 6.4987        | -1.24711        | 5571        | 7.3595        | 2.8005        | -0.59477        |
| 1.353825        | 5015        | 17.149        | 5.429         | 1.041479        | 4920        | 11.565        | 1.405         | 0.299035        |
| -0.34141        | 4134        | 12.748        | 1.028         | 0.197052        | 4577        | 9.3948        | 0.7652        | -0.16221        |
| <b>3.667391</b> | <b>4070</b> | <b>25.971</b> | <b>14.251</b> | <b>2.73417</b>  | <b>5220</b> | <b>25.594</b> | <b>15.434</b> | <b>3.280666</b> |
| -0.45134        | 3920        | 15.867        | 4.147         | 0.795499        | 5328        | 10.83         | 0.67          | 0.142822        |
| 0.468558        | 3724        | 14.098        | 2.378         | 0.456079        | 4965        | 11.42         | 1.26          | 0.268217        |
| -0.68218        | 2605        | 10.633        | 1.087         | -0.20876        | 2701        | 4.4798        | 5.6802        | -1.20681        |
| 0.692439        | 3107        | 11.136        | 0.584         | -0.11224        | 4528        | 9.4302        | 0.7298        | -0.15468        |
| <b>2.467187</b> | <b>4110</b> | <b>23.114</b> | <b>11.394</b> | <b>2.185993</b> | <b>5313</b> | <b>25.485</b> | <b>15.325</b> | <b>3.2575</b>   |
| 3.071778        | 3353        | 11.423        | 0.297         | -0.05718        | 4015        | 18.904        | 8.744         | 1.858817        |
| 0.516742        | 3075        | 8.3577        | 3.3623        | -0.64532        | 4177        | 7.1104        | 3.0496        | -0.64772        |
| 0.845236        | 2632        | 13.564        | 1.844         | 0.353619        | 4022        | 15.639        | 5.479         | 1.164896        |
| 1.861131        | 3885        | 17.349        | 5.629         | 1.079853        | 5029        | 21.754        | 11.594        | 2.464538        |
| 1.532454        | 3557        | 8.1529        | 3.5671        | -0.68462        | 4345        | 13.487        | 3.327         | 0.707524        |
| 1.351077        | 2724        | 13.032        | 1.312         | 0.251544        | 3635        | 11.224        | 1.064         | 0.226561        |
| 0.264463        | 3895        | 9.7561        | 1.9639        | -0.37701        | 4147        | 15.288        | 5.128         | 1.090297        |
| -0.4103         | 3693        | 6.8779        | 4.8421        | -0.92925        | 3941        | 8.5765        | 1.5835        | -0.33612        |
| 0.961574        | 4644        | 6.2016        | 5.5184        | -1.05902        | 5262        | 9.5401        | 0.6199        | -0.13132        |
| 0.289013        | 4345        | 6.8124        | 4.9076        | -0.94182        | 4210        | 9.7862        | 0.3738        | -0.07902        |
| 1.956033        | 4816        | 12.189        | 0.469         | 0.089796        | 5913        | 21.935        | 11.775        | 2.503006        |
| 1.090187        | 4645        | 7.4058        | 4.3142        | -0.82796        | 3905        | 15.186        | 5.026         | 1.068618        |

|          |      |        |        |          |      |        |        |          |
|----------|------|--------|--------|----------|------|--------|--------|----------|
| 0.08675  | 4933 | 16.744 | 5.024  | 0.963771 | 5723 | 11.463 | 1.303  | 0.277356 |
| -0.82288 | 3784 | 9.9894 | 1.7306 | -0.33224 | 3881 | 3.8135 | 6.3465 | -1.34842 |
| 0.242844 | 4358 | 19.229 | 7.509  | 1.440572 | 5902 | 10.945 | 0.785  | 0.167264 |
| -0.04992 | 4254 | 13.54  | 1.82   | 0.349014 | 4746 | 7.9435 | 2.2165 | -0.47066 |
| 0.241561 | 2837 | 11.103 | 0.617  | -0.11858 | 2945 | 11.986 | 1.826  | 0.388511 |
| 0.505566 | 4403 | 18.26  | 6.54   | 1.254648 | 3102 | 10.155 | 0.005  | -0.00064 |
| 1.143134 | 3953 | 21.579 | 9.859  | 1.89147  | 3899 | 17.62  | 7.46   | 1.585925 |
| -0.38959 | 4842 | 14.209 | 2.489  | 0.477376 | 4510 | 9.9557 | 0.2043 | -0.043   |
| -0.45555 | 4108 | 11.003 | 0.717  | -0.13776 | 3912 | 8.2311 | 1.9289 | -0.40953 |
| 1.70064  | 3144 | 18.257 | 6.537  | 1.254072 | 2919 | 15.964 | 5.804  | 1.233969 |
| -0.49531 | 3540 | 8.8983 | 2.8217 | -0.5416  | 2864 | 10.161 | 0.001  | 0.000638 |
| -0.47589 | 3372 | 13.642 | 1.922  | 0.368585 | 2907 | 9.2191 | 0.9409 | -0.19955 |
| 2.085196 | 3744 | 23.424 | 11.704 | 2.245473 | 3017 | 19.987 | 9.827  | 2.088991 |
| 1.957316 | 3462 | 25.621 | 13.901 | 2.667015 | 3306 | 27.374 | 17.214 | 3.658976 |
| 0.890672 | 4443 | 13.482 | 1.762  | 0.337886 | 3604 | 16.315 | 6.155  | 1.308568 |
| 0.059451 | 4599 | 6.6754 | 5.0446 | -0.96811 | 4193 | 9.7305 | 0.4295 | -0.09086 |
| 0.698852 | 3667 | 12.817 | 1.097  | 0.210291 | 4102 | 19.625 | 9.465  | 2.012054 |
| 2.537723 | 5067 | 17.9   | 6.18   | 1.185574 | 3600 | 26.056 | 15.896 | 3.378857 |
| 0.458115 | 3630 | 8.3471 | 3.3729 | -0.64736 | 3448 | 10.789 | 0.629  | 0.134109 |
| -0.6787  | 4332 | 5.1939 | 6.5261 | -1.25236 | 3959 | 15.029 | 4.869  | 1.03525  |
| -0.93045 | 4790 | 7.7871 | 3.9329 | -0.7548  | 5350 | 1.6822 | 8.4778 | -1.80139 |
| 1.209456 | 5568 | 19.648 | 7.928  | 1.520966 | 4052 | 5.7502 | 4.4098 | -0.9368  |
| 0.514177 | 3656 | 11.844 | 0.124  | 0.0236   | 3682 | 4.3998 | 5.7602 | -1.22381 |
| -0.53103 | 4270 | 11.663 | 0.057  | -0.01113 | 3711 | 3.1528 | 7.0072 | -1.48884 |
| 0.320708 | 4343 | 10.661 | 1.059  | -0.20338 | 4218 | 4.0778 | 6.0822 | -1.29225 |
| 0.284982 | 3629 | 15.679 | 3.959  | 0.759428 | 3432 | 5.0991 | 5.0609 | -1.07519 |
| -0.04754 | 3864 | 12.785 | 1.065  | 0.204151 | 3072 | 8.3659 | 1.7941 | -0.38088 |
| 2.917882 | 4097 | 34.757 | 23.037 | 4.419953 | 4418 | 10.616 | 0.456  | 0.09734  |
| 0.535429 | 2247 | 22.207 | 10.487 | 2.011965 | 1908 | 2.044  | 8.116  | -1.7245  |
| 3.440395 | 2600 | 29.923 | 18.203 | 3.492446 | 3321 | 11.262 | 1.102  | 0.234637 |
| 3.42757  | 2786 | 33.094 | 21.374 | 4.100871 | 3201 | 13.496 | 3.336  | 0.709437 |
| 1.960614 | 4440 | 24.144 | 12.424 | 2.38362  | 3572 | 8.7346 | 1.4254 | -0.30252 |
| -0.16571 | 4053 | 16.062 | 4.342  | 0.832914 | 3357 | 3.5746 | 6.5854 | -1.39919 |
| 2.306513 | 5142 | 26.293 | 14.573 | 2.795952 | 3298 | 5.852  | 4.308  | -0.91517 |
| 3.104755 | 4806 | 28.672 | 16.952 | 3.252415 | 3312 | 7.7899 | 2.3701 | -0.5033  |
| -0.34856 | 5113 | 15.412 | 3.692  | 0.708198 | 4567 | 4.7077 | 5.4523 | -1.15837 |
| 1.83365  | 5812 | 19.288 | 7.568  | 1.451892 | 4095 | 8.8156 | 1.3444 | -0.2853  |
| 0.668805 | 4489 | 16.908 | 5.188  | 0.995238 | 3654 | 7.2523 | 2.9077 | -0.61756 |
| 3.250407 | 4717 | 27.009 | 15.289 | 2.933332 | 3891 | 13.698 | 3.538  | 0.752368 |
| -0.93026 | 5604 | 9.5824 | 2.1376 | -0.41034 | 4288 | 3.0317 | 7.1283 | -1.51458 |
| -1.17375 | 3524 | 2.8377 | 8.8823 | -1.70445 | 3104 | 7.9897 | 2.1703 | -0.46084 |
| 0.761143 | 4315 | 7.1842 | 4.5358 | -0.87048 | 3974 | 12.783 | 2.623  | 0.5579   |
| 0.200889 | 3409 | 3.3148 | 8.4052 | -1.61291 | 3120 | 10.449 | 0.289  | 0.061847 |
| -0.53891 | 3876 | 8.0753 | 3.6447 | -0.69951 | 3114 | 12.203 | 2.043  | 0.434631 |
| -0.18165 | 3482 | 5.8874 | 5.8326 | -1.1193  | 2992 | 16.243 | 6.083  | 1.293266 |
| -0.34581 | 5901 | 10.659 | 1.061  | -0.20377 | 3346 | 12.403 | 2.243  | 0.477138 |
| -1.1841  | 4935 | 12.462 | 0.742  | 0.142177 | 2447 | 12.955 | 2.795  | 0.594456 |

|                 |             |               |               |               |             |               |              |                 |
|-----------------|-------------|---------------|---------------|---------------|-------------|---------------|--------------|-----------------|
| -0.7049         | 4256        | 9.7039        | 2.0161        | -0.38702      | 3020        | 10.596        | 0.436        | 0.09309         |
| 0.550269        | 2577        | 9.0415        | 2.6785        | -0.51412      | 2456        | 13.599        | 3.439        | 0.731328        |
| -0.46746        | 2787        | 7.1044        | 4.6156        | -0.88579      | 2989        | 11.643        | 1.483        | 0.315612        |
| -0.13054        | 2765        | 3.0741        | 8.6459        | -1.65909      | 2838        | 7.9281        | 2.2319       | -0.47393        |
| -0.78313        | 3245        | 8.7827        | 2.9373        | -0.56378      | 3580        | 10.922        | 0.762        | 0.162376        |
| -0.27747        | 3665        | 5.457         | 6.263         | -1.20188      | 2808        | 13.426        | 3.266        | 0.694559        |
| -2.14036        | 2083        | 1.1042        | 10.6158       | -2.03706      | 2461        | 4.3072        | 5.8528       | -1.24349        |
| -0.60083        | 2411        | 8.9589        | 2.7611        | -0.52997      | 2465        | 9.2495        | 0.9105       | -0.19309        |
| 0.930611        | 4143        | 16.389        | 4.669         | 0.895656      | 2784        | 21.875        | 11.715       | 2.490254        |
| 1.262037        | 4127        | 15.071        | 3.351         | 0.64277       | 3898        | 15.829        | 5.669        | 1.205277        |
| -0.04791        | 4364        | 8.1347        | 3.5853        | -0.68811      | 4100        | 15.732        | 5.572        | 1.184661        |
| -1.07122        | 4450        | 6.9213        | 4.7987        | -0.92093      | 3737        | 6.9575        | 3.2025       | -0.68021        |
| -1.25064        | 4469        | 7.2052        | 4.5148        | -0.86645      | 3759        | 6.4379        | 3.7221       | -0.79065        |
| -0.14721        | 4263        | 10.978        | 0.742         | -0.14256      | 4972        | 11.243        | 1.083        | 0.230599        |
| 0.724684        | 2989        | 12.211        | 0.491         | 0.094017      | 3568        | 8.6883        | 1.4717       | -0.31236        |
| 0.952047        | 2301        | 12.994        | 1.274         | 0.244252      | 2880        | 13.75         | 3.59         | 0.76342         |
| 1.629921        | 4310        | 19.35         | 7.63          | 1.463788      | 4383        | 14.579        | 4.419        | 0.93961         |
| 0.653049        | 4421        | 16.173        | 4.453         | 0.854212      | 3986        | 20.672        | 10.512       | 2.234577        |
| 1.948522        | 3489        | 13.672        | 1.952         | 0.374341      | 4139        | 22.88         | 12.72        | 2.70385         |
| 1.05043         | 3941        | 10.683        | 1.037         | -0.19916      | 4034        | 16.039        | 5.879        | 1.249909        |
| 0.793388        | 4097        | 12.473        | 0.753         | 0.144287      | 3630        | 16.612        | 6.452        | 1.371691        |
| -0.61311        | 4237        | 11.706        | 0.014         | -0.00288      | 3581        | 10.165        | 0.005        | 0.001488        |
| 0.200156        | 3569        | 10.255        | 1.465         | -0.28128      | 3171        | 14.16         | 4            | 0.850559        |
| 0.335365        | 3403        | 8.1105        | 3.6095        | -0.69275      | 2899        | 13.384        | 3.224        | 0.685633        |
| -0.43924        | 3797        | 7.9273        | 3.7927        | -0.7279       | 2781        | 6.6882        | 3.4718       | -0.73745        |
| -0.14959        | 3618        | 10.227        | 1.493         | -0.28666      | 3149        | 11.782        | 1.622        | 0.345154        |
| 1.163104        | 5704        | 17.742        | 6.022         | 1.155259      | 4808        | 18.989        | 8.829        | 1.876883        |
| 0.152155        | 4318        | 9.1478        | 2.5722        | -0.49372      | 3290        | 17.447        | 7.287        | 1.549156        |
| -0.70398        | 3763        | 5.182         | 6.538         | -1.25465      | 2950        | 10.169        | 0.009        | 0.002338        |
| -0.65488        | 6186        | 11.009        | 0.711         | -0.13661      | 6288        | 16.842        | 6.682        | 1.420573        |
| 0.824716        | 5328        | 10.417        | 1.303         | -0.2502       | 5287        | 17.231        | 7.071        | 1.503249        |
| -1.32458        | 4323        | 4.6264        | 7.0936        | -1.36125      | 4475        | 10.391        | 0.231        | 0.04952         |
| -1.12599        | 5879        | 13.285        | 1.565         | 0.300087      | 3722        | 12.144        | 1.984        | 0.422091        |
| 0.383365        | 4891        | 8.7303        | 2.9897        | -0.57383      | 5557        | 3.725         | 6.435        | -1.36723        |
| -0.02263        | 4311        | 7.2605        | 4.4595        | -0.85584      | 5063        | 5.8858        | 4.2742       | -0.90799        |
| <b>4.664232</b> | <b>3954</b> | <b>29.818</b> | <b>18.098</b> | <b>3.4723</b> | <b>2515</b> | <b>12.684</b> | <b>2.524</b> | <b>0.536859</b> |
| -9.2E-05        | 4239        | 11.607        | 0.113         | -0.02187      | 3658        | 5.4675        | 4.6925       | -0.99689        |
| 1.449826        | 3822        | 8.9744        | 2.7456        | -0.52699      | 3489        | 5.5603        | 4.5997       | -0.97716        |
| 1.338618        | 4966        | 11.498        | 0.222         | -0.04279      | 4502        | 7.4411        | 2.7189       | -0.57743        |
| -0.49952        | 4563        | 7.254         | 4.466         | -0.85709      | 3673        | 5.7718        | 4.3882       | -0.93221        |
| 0.579216        | 5388        | 9.0757        | 2.6443        | -0.50756      | 4270        | 3.185         | 6.975        | -1.482          |
| 2.471951        | 3938        | 17.649        | 5.929         | 1.137415      | 2576        | 9.1227        | 1.0373       | -0.22004        |
| 2.119456        | 3996        | 18.969        | 7.249         | 1.390685      | 3733        | 12.483        | 2.323        | 0.49414         |
| 3.810294        | 3573        | 15.701        | 3.981         | 0.763649      | 3163        | 11.793        | 1.633        | 0.347492        |
| -0.3088         | 4068        | 6.1455        | 5.5745        | -1.06978      | 3926        | 3.3367        | 6.8233       | -1.44975        |
| 1.83878         | 4652        | 16.402        | 4.682         | 0.898151      | 3727        | 7.7811        | 2.3789       | -0.50517        |
| 0.807128        | 6127        | 14.036        | 2.316         | 0.444183      | 4917        | 6.7114        | 3.4486       | -0.73252        |

|                 |             |               |               |                 |             |              |           |                |
|-----------------|-------------|---------------|---------------|-----------------|-------------|--------------|-----------|----------------|
| 0.609446        | 2926        | 10.868        | 0.852         | -0.16367        | 2358        | 5.8524       | 4.3076    | -0.91508       |
| 1.177211        | 5472        | 18.476        | 6.756         | 1.296092        | 5218        | 12.764       | 2.604     | 0.553862       |
| 1.323412        | 5283        | 14.424        | 2.704         | 0.518629        | 4788        | 11.404       | 1.244     | 0.264817       |
| 3.508549        | 4956        | 16.606        | 4.886         | 0.937293        | 5455        | 14.372       | 4.212     | 0.895616       |
| 0.967803        | 5416        | 12.592        | 0.872         | 0.16712         | 5450        | 11.67        | 1.51      | 0.321351       |
| 1.348145        | 3700        | 6.7838        | 4.9362        | -0.94731        | 4460        | 8.9013       | 1.2587    | -0.26709       |
| -1.19388        | 4134        | 17.417        | 5.697         | 1.0929          | 5296        | 10.423       | 0.263     | 0.056321       |
| 1.243716        | 3522        | 19.903        | 8.183         | 1.569893        | 3241        | 12.866       | 2.706     | 0.575541       |
| -0.2619         | 4720        | 11.102        | 0.618         | -0.11877        | 5007        | 11.025       | 0.865     | 0.184266       |
| 0.565109        | 5385        | 11.736        | 0.016         | 0.002878        | 4615        | 9.5125       | 0.6475    | -0.13719       |
| 0.485963        | 5653        | 11.799        | 0.079         | 0.014966        | 4625        | 9.9676       | 0.1924    | -0.04047       |
| 1.487751        | 5368        | 17.884        | 6.164         | 1.182504        | 4366        | 15.506       | 5.346     | 1.136629       |
| 0.344708        | 3998        | 15.533        | 3.813         | 0.731414        | 2926        | 10.971       | 0.811     | 0.17279        |
| 1.046766        | 4165        | 10.372        | 1.348         | -0.25883        | 3843        | 12.36        | 2.2       | 0.467999       |
| -0.04058        | 4402        | 9.4502        | 2.2698        | -0.4357         | 3520        | 6.4205       | 3.7395    | -0.79434       |
| -0.60047        | 3626        | 10.039        | 1.681         | -0.32273        | 2954        | 8.0907       | 2.0693    | -0.43937       |
| 0.358999        | 4088        | 22.603        | 10.883        | 2.087946        | 4146        | 15.557       | 5.397     | 1.147468       |
| -0.94439        | 4727        | 10.768        | 0.952         | -0.18285        | 3735        | 9.7456       | 0.4144    | -0.08765       |
| 1.365367        | 5183        | 9.1067        | 2.6133        | -0.50161        | 4601        | 18.04        | 7.88      | 1.675189       |
| 0.298173        | 3794        | 8.6452        | 3.0748        | -0.59016        | 3630        | 4.1322       | 6.0278    | -1.28068       |
| <b>3.148359</b> | <b>5296</b> | <b>22.413</b> | <b>10.693</b> | <b>2.051491</b> | <b>4646</b> | <b>23.16</b> | <b>13</b> | <b>2.76336</b> |
| 1.289885        | 5293        | 14.831        | 3.111         | 0.596721        | 4295        | 15.041       | 4.881     | 1.037801       |
| 1.255625        | 5837        | 9.2685        | 2.4515        | -0.47056        | 5605        | 12.186       | 2.026     | 0.431018       |
| 0.104521        | 6265        | 13.168        | 1.448         | 0.277638        | 6322        | 14.046       | 3.886     | 0.82633        |
| 0.399671        | 6032        | 13.511        | 1.791         | 0.34345         | 5601        | 17.765       | 7.605     | 1.616742       |
| -0.9796         | 3465        | 5.3968        | 6.3232        | -1.21343        | 4456        | 5.7002       | 4.4598    | -0.94743       |
| 0.214996        | 5773        | 13.58         | 1.86          | 0.356689        | 3684        | 12.025       | 1.865     | 0.3968         |
| -0.33866        | 4314        | 11.196        | 0.524         | -0.10073        | 3232        | 8.0755       | 2.0845    | -0.4426        |
| -0.67284        | 5395        | 11.362        | 0.358         | -0.06888        | 4521        | 4.3353       | 5.8247    | -1.23752       |
| 0.468374        | 5931        | 13.269        | 1.549         | 0.297017        | 4042        | 8.2385       | 1.9215    | -0.40796       |
| 0.156003        | 6013        | 13.87         | 2.15          | 0.412332        | 4558        | 9.4998       | 0.6602    | -0.13989       |
| -0.29707        | 6348        | 9.4203        | 2.2997        | -0.44144        | 3517        | 6.4259       | 3.7341    | -0.7932        |
| -0.98691        | 5989        | 13.258        | 1.538         | 0.294907        | 3541        | 7.6532       | 2.5068    | -0.53235       |
| 9.16E-05        | 6231        | 17.525        | 5.805         | 1.113622        | 3934        | 13.218       | 3.058     | 0.650352       |
| -0.99801        | 5433        | 14.909        | 3.189         | 0.611687        | 3286        | 7.0907       | 3.0693    | -0.6519        |
| -0.61861        | 4907        | 10.556        | 1.164         | -0.22353        | 4626        | 10.182       | 0.022     | 0.005101       |
| 0.246325        | 4583        | 13.07         | 1.35          | 0.258835        | 3768        | 11.624       | 1.464     | 0.311574       |
| -0.69537        | 5977        | 11.31         | 0.41          | -0.07886        | 4511        | 10.818       | 0.658     | 0.140272       |
| 0.007054        | 5760        | 10.243        | 1.477         | -0.28359        | 4546        | 15.926       | 5.766     | 1.225893       |
| -0.95599        | 4825        | 10.073        | 1.647         | -0.3162         | 3994        | 8.4877       | 1.6723    | -0.35499       |
| 0.784227        | 5921        | 11.501        | 0.219         | -0.04221        | 5035        | 17.597       | 7.437     | 1.581036       |
| -0.05835        | 4687        | 13.847        | 2.127         | 0.407919        | 4876        | 10.931       | 0.771     | 0.164288       |
| 1.315717        | 5575        | 16.126        | 4.406         | 0.845194        | 4270        | 15.785       | 5.625     | 1.195926       |
| -0.10544        | 4921        | 10.994        | 0.726         | -0.13949        | 4899        | 13.268       | 3.108     | 0.660979       |
| -0.87534        | 3965        | 8.9533        | 2.7667        | -0.53104        | 4365        | 20.871       | 10.711    | 2.276871       |
| -0.37897        | 4248        | 11.276        | 0.444         | -0.08538        | 5041        | 16.485       | 6.325     | 1.344699       |
| -1.11168        | 3777        | 6.0365        | 5.6835        | -1.09069        | 3550        | 1.2958       | 8.8642    | -1.88351       |

|                 |             |               |               |                 |             |               |               |                 |
|-----------------|-------------|---------------|---------------|-----------------|-------------|---------------|---------------|-----------------|
| -0.15032        | 2714        | 8.2903        | 3.4297        | -0.65825        | 3085        | 5.8671        | 4.2929        | -0.91196        |
| -0.24871        | 3433        | 8.4474        | 3.2726        | -0.62811        | 4765        | 7.1144        | 3.0456        | -0.64687        |
| -0.19613        | 3857        | 8.5299        | 3.1901        | -0.61228        | 3580        | 3.6313        | 6.5287        | -1.38714        |
| -0.04479        | 4353        | 5.1459        | 6.5741        | -1.26157        | 4400        | 6.5909        | 3.5691        | -0.75813        |
| 1.706869        | 3341        | 13.14         | 1.42          | 0.272266        | 3144        | 12.595        | 2.435         | 0.517944        |
| 1.264785        | 4008        | 7.1357        | 4.5843        | -0.87979        | 3860        | 5.4145        | 4.7455        | -1.00815        |
| -0.00614        | 3333        | 9.3909        | 2.3291        | -0.44708        | 3090        | 3.9159        | 6.2441        | -1.32665        |
| -0.04699        | 4162        | 6.3191        | 5.4009        | -1.03647        | 2774        | 3.1723        | 6.9877        | -1.48469        |
| 0.43045         | 3096        | 15.278        | 3.558         | 0.682487        | 3061        | 13.623        | 3.463         | 0.736428        |
| -1.33081        | 2674        | 4.0763        | 7.6437        | -1.4668         | 2715        | 7.4033        | 2.7567        | -0.58547        |
| -0.3328         | 4409        | 8.3239        | 3.3961        | -0.65181        | 3503        | 9.0779        | 1.0821        | -0.22956        |
| 2.510425        | 4696        | 19.676        | 7.956         | 1.526338        | 3453        | 16.913        | 6.753         | 1.435663        |
| 1.99579         | 5179        | 16.412        | 4.692         | 0.900069        | 3957        | 18.676        | 8.516         | 1.81036         |
| -0.72084        | 3606        | 9.4287        | 2.2913        | -0.43983        | 2609        | 5.8643        | 4.2957        | -0.91255        |
| -1.25628        | 1425        | 4.3509        | 7.3691        | -1.41411        | 1865        | 4.0214        | 6.1386        | -1.30423        |
| <b>3.663544</b> | <b>5830</b> | <b>24.923</b> | <b>13.203</b> | <b>2.533088</b> | <b>5315</b> | <b>33.302</b> | <b>23.142</b> | <b>4.918874</b> |
| 0.188431        | 4687        | 8.8329        | 2.8871        | -0.55414        | 4534        | 9.3957        | 0.7643        | -0.16201        |
| 0.318692        | 5367        | 12.353        | 0.633         | 0.121263        | 5239        | 14.602        | 4.442         | 0.944499        |
| -0.74704        | 3078        | 7.2125        | 4.5075        | -0.86505        | 2952        | 13.449        | 3.289         | 0.699448        |
| -0.16077        | 2958        | 8.384         | 3.336         | -0.64028        | 3342        | 5.9246        | 4.2354        | -0.89974        |
| -0.40627        | 2651        | 8.0724        | 3.6476        | -0.70006        | 2683        | 5.8517        | 4.3083        | -0.91523        |
| -0.18953        | 3860        | 13.135        | 1.415         | 0.271306        | 2711        | 6.7872        | 3.3728        | -0.71641        |
| -0.35185        | 4037        | 9.8093        | 1.9107        | -0.3668         | 3045        | 8.5386        | 1.6214        | -0.34418        |
| -1.29212        | 4144        | 3.2095        | 8.5105        | -1.63311        | 2125        | 4.4706        | 5.6894        | -1.20876        |
| -0.12944        | 2568        | 5.7243        | 5.9957        | -1.1506         | 1382        | 5.2098        | 4.9502        | -1.05166        |
| 1.288785        | 3972        | 12.462        | 0.742         | 0.142177        | 2561        | 11.011        | 0.851         | 0.181291        |
| 0.233134        | 5698        | 12.548        | 0.828         | 0.158678        | 3102        | 8.7685        | 1.3915        | -0.29532        |
| 0.077589        | 2624        | 8.4985        | 3.2215        | -0.61831        | 1848        | 8.8203        | 1.3397        | -0.28431        |
| 0.269409        | 2929        | 10.106        | 1.614         | -0.30987        | 2315        | 7.6458        | 2.5142        | -0.53393        |
| 0.136399        | 2690        | 6.2825        | 5.4375        | -1.04349        | 1976        | 5.1113        | 5.0487        | -1.07259        |
| -1.39756        | 2160        | 6.1111        | 5.6089        | -1.07638        | 1937        | 4.9045        | 5.2555        | -1.11654        |
| -0.50154        | 4368        | 5.7005        | 6.0195        | -1.15516        | 2919        | 4.3851        | 5.7749        | -1.22693        |
| -0.26721        | 4347        | 7.9825        | 3.7375        | -0.71731        | 4552        | 11.094        | 0.934         | 0.198931        |
| 0.209866        | 2483        | 13.492        | 1.772         | 0.339805        | 3456        | 7.4942        | 2.6658        | -0.56615        |
| -0.4561         | 3096        | 6.7506        | 4.9694        | -0.95368        | 2999        | 14.138        | 3.978         | 0.845883        |
| -0.48926        | 3932        | 14.827        | 3.107         | 0.595953        | 3477        | 15.042        | 4.882         | 1.038013        |
| -0.96672        | 3995        | 4.6558        | 7.0642        | -1.35561        | 3775        | 6.755         | 3.405         | -0.72325        |
| -1.29001        | 2242        | 5.4416        | 6.2784        | -1.20484        | 2986        | 7.6356        | 2.5244        | -0.53609        |
| 1.408055        | 3577        | 10.54         | 1.18          | -0.2266         | 4190        | 13.365        | 3.205         | 0.681595        |
|                 | 4092.5      | 11.721        | 3.5215        |                 | 3911        | 10.158        | 3.17915       |                 |
|                 |             |               | 10.5645       |                 |             |               | 9.53745       |                 |
|                 |             |               | 5.21182       |                 |             |               | 4.705142      |                 |
| 6979            | 54.936      |               | 5703          | 47.361          |             |               |               |                 |
| 5189            | 48.372      |               | 4881          | 40.791          |             |               |               |                 |
| 5126            | 51.385      |               | 4609          | 48.948          |             |               |               |                 |
| 5853            | 45.327      |               | 5754          | 43.865          |             |               |               |                 |

|          |          |          |          |
|----------|----------|----------|----------|
| 5786.75  | 50.005   | 5236.75  | 45.24125 |
| 860.1831 | 4.113779 | 578.9544 | 3.648384 |
| 2127     | 4.2313   | 2936     | 11.989   |
| 2496     | 5.9295   | 1991     | 15.269   |
| 2793     | 10.92    | 1689     | 1.3025   |
| 1975     | 8.1519   | 1989     | 10.86    |
| 2347.75  | 7.308175 | 2151.25  | 9.855125 |
| 368.736  | 2.893962 | 542.0679 | 6.000573 |
|          | 8.681887 |          | 18.00172 |
|          | 12.34134 |          | 10.94515 |
|          | 21.02322 |          | 28.94687 |
| 3439     | 42.69683 | 3085.5   | 35.38613 |
|          | 0.492384 |          | 0.818029 |
|          | 0.507616 |          | 0.181971 |

|      |        |      |        |
|------|--------|------|--------|
| 757  | 13.21  | 1156 | 9.6021 |
| 960  | 19.896 | 743  | 4.8452 |
| 4077 | 17.537 | 3787 | 4.9115 |
| 3625 | 6.9793 | 3198 | 13.977 |
| 5498 | 19.407 | 5856 | 25.82  |
| 6325 | 21.249 | 7198 | 9.7944 |



y

y

y

y

y

y

y

y

y

y

y

y  
y

y

x        debris a

y  
y

x        debris a  
y

y

y

y

y

|           |                        |        |           | cell ct | % inf  | AD     |
|-----------|------------------------|--------|-----------|---------|--------|--------|
| 50075 A02 | M-007258- selenophos   | 168474 | LOC168474 | 2811    | 1.174  | 10.586 |
| 50075 A04 | M-012923- GTPase, IM   | 170575 | GIMAP1    | 3653    | 13.332 | 1.572  |
| 50075 A05 | M-017606- piggyBac tr  | 161779 | PGBD4     | 3743    | 17.66  | 5.9    |
| 50075 A06 | M-013167- DEAH (Asp-   | 170506 | DHX36     | 2565    | 9.3567 | 2.4033 |
| 50075 A07 | M-004787- exonucleas   | 161829 | EXDL1     | 2168    | 8.3487 | 3.4113 |
| 50075 A08 | M-008921- C-type lecti | 170482 | CLEC4C    | 2019    | 6.7855 | 4.9745 |
| 50075 A09 | M-018333- fibrous she  | 161835 | FSIP1     | 2200    | 10.955 | 0.805  |
| 50075 A10 | M-014943- single strar | 170463 | SSBP4     | 1979    | 12.936 | 1.176  |
| 50075 A11 | M-016307- zinc finger  | 161882 | ZFPM1     | 2511    | 9.5978 | 2.1622 |
| 50075 A12 | M-029639- hypothetic:  | 170425 | LOC170425 | 2352    | 8.5884 | 3.1716 |
| 50075 A13 | M-018713- adenosine    | 161931 | ADAD2     | 2541    | 6.4935 | 5.2665 |
| 50075 A14 | M-026282- PWWP dor     | 170394 | PWWP2     | 2530    | 9.3281 | 2.4319 |
| 50075 A15 | M-022498- hypothetic:  | 162073 | LOC162073 | 2857    | 16.906 | 5.146  |
| 50075 A16 | M-018497- chromoson    | 170393 | C10orf91  | 3504    | 17.637 | 5.877  |
| 50075 A17 | M-019403- TNT protei   | 162083 | TNT       | 3196    | 11.702 | 0.058  |
| 50075 A18 | M-016942- oncoprotei   | 170392 | OIT3      | 3185    | 13.155 | 1.395  |
| 50075 A19 | M-007149- zinc finger  | 162239 | ZFP1      | 2723    | 8.6669 | 3.0931 |
| 50075 A20 | M-008993- fucosyltran  | 170384 | FUT11     | 2107    | 9.2074 | 2.5526 |
| 50075 A21 | M-016498- ankyrin-rep  | 162282 | ANKFN1    | 2594    | 8.7124 | 3.0476 |
| 50075 A23 | M-007150- ring finger  | 162333 | RNF190    | 2090    | 4.7368 | 7.0232 |
| 50075 B02 | M-007566- solute carri | 201266 | SLC39A11  | 4938    | 5.5691 | 6.1909 |
| 50075 B04 | M-016887- leucine rich | 201255 | LRRC45    | 5075    | 5.931  | 5.829  |
| 50075 B05 | M-015294- glycoprotei  | 170589 | GPHA2     | 4286    | 7.2329 | 4.5271 |
| 50075 B06 | M-016829- stimulated   | 201254 | STRA13    | 3957    | 16.351 | 4.591  |
| 50075 B07 | M-015295- S100 calciu  | 170591 | S100Z     | 4740    | 9.0717 | 2.6883 |
| 50075 B08 | M-016501- hypothetic:  | 201252 | FLJ23754  | 1575    | 4.254  | 7.506  |
| 50075 B09 | M-021721- COMM dor     | 170622 | COMM6     | 3751    | 15.009 | 3.249  |
| 50075 B10 | M-018020- chromoson    | 201243 | C17orf74  | 2806    | 10.478 | 1.282  |
| 50075 B11 | M-017500- X antigen fi | 170626 | XAGE3     | 2473    | 10.675 | 1.085  |
| 50075 B12 | M-031866- solute carri | 201232 | SLC16A13  | 2733    | 5.7446 | 6.0154 |
| 50075 B13 | M-017499- X antigen fi | 170627 | XAGE5     | 2806    | 17.89  | 6.13   |
| 50075 B14 | M-030940- hypothetic:  | 201229 | LOC201229 | 3078    | 15.01  | 3.25   |
| 50075 B15 | M-020742- psoriasis su | 170679 | PSORS1C1  | 3738    | 22.525 | 10.765 |
| 50075 B16 | M-017804- sterile alph | 201191 | SAMD14    | 3182    | 17.033 | 5.273  |
| 50075 B17 | M-020744- psoriasis su | 170680 | PSORS1C2  | 2297    | 10.71  | 1.05   |
| 50075 B18 | M-027281- Rho GTPasi   | 201176 | ARHGAP27  | 3538    | 11.193 | 0.567  |
| 50075 B19 | M-024693- nudix (nucl  | 170685 | NUDT10    | 2852    | 4.6283 | 7.1317 |
| 50075 B20 | M-030897- hypothetic:  | 201175 | LOC201175 | 3320    | 8.9458 | 2.8142 |
| 50075 B21 | M-015309- cytochrom    | 170712 | COX7B2    | 3976    | 9.9095 | 1.8505 |
| 50075 B23 | M-015418- GS homeok    | 170825 | GSH2      | 4224    | 14.276 | 2.516  |
| 50075 C02 | M-026272- chromoson    | 170371 | C10orf128 | 6167    | 16.264 | 4.504  |
| 50075 C04 | M-029627- chromoson    | 170370 | C10orf73  | 5861    | 10.971 | 0.789  |
| 50075 C05 | M-016639- hypothetic:  | 162387 | FLJ35773  | 5232    | 19.82  | 8.06   |
| 50075 C06 | M-018498- zinc finger, | 170261 | ZCCHC12   | 4894    | 22.742 | 10.982 |
| 50075 C07 | M-027164- schlafen fa  | 162394 | SLFN5     | 4196    | 19.113 | 7.353  |
| 50075 C08 | M-024910- TFS2-M doi   | 170082 | MGC17403  | 3361    | 15.382 | 3.622  |



|                  |                              |                        |             |               |               |
|------------------|------------------------------|------------------------|-------------|---------------|---------------|
| 50075 C09        | M-008648- N-acetylglu        | 162417 NAGS            | 4120        | 18.01         | 6.25          |
| 50075 C10        | M-016941- Fanconi an         | 2187 FANCB             | 2602        | 13.566        | 1.806         |
| 50075 C11        | M-018456- family with        | 162427 FAM134C         | 2415        | 20.041        | 8.281         |
| 50075 C12        | M-016940- chromoson          | 170063 CXorf22         | 3473        | 19.292        | 7.532         |
| 50075 C13        | M-016870- transmemk          | 162461 TMEM92          | 2383        | 18.296        | 6.536         |
| 50075 C14        | M-016939- family with        | 170062 FAM47B          | 3005        | 13.478        | 1.718         |
| 50075 C15        | M-006029- rhomboid,          | 162494 RHBDL3          | 2244        | 12.121        | 0.361         |
| 50075 C16        | M-024685- spindlin far       | 169981 SPIN3           | 3569        | 24.769        | 13.009        |
| 50075 C17        | M-007404- solute carri       | 162515 SLC16A11        | 2743        | 11.083        | 0.677         |
| 50075 C18        | M-016938- family with        | 169966 FAM46D          | 2847        | 15.033        | 3.273         |
| 50075 C19        | M-016871- F-box prote        | 162517 FBXO39          | 4000        | 11.4          | 0.36          |
| 50075 C20        | M-019308- zinc finger        | 169841 ZNF169          | 4143        | 16.462        | 4.702         |
| 50075 C21        | M-005928- intramemb          | 162540 IMP5            | 4287        | 10.404        | 1.356         |
| 50075 C23        | M-018761- keratin 28         | 162605 KRT28           | 5084        | 17.093        | 5.333         |
| 50075 D02        | M-017858- similar to C       | 201164 LOC201164       | 5400        | 2.2963        | 9.4637        |
| 50075 D04        | M-018965- proline rich       | 201161 PRR6            | 4436        | 5.7484        | 6.0116        |
| 50075 D05        | M-030681- KIAA1987 p         | 170951 KIAA1987        | 4718        | 5.2353        | 6.5247        |
| 50075 D06        | M-016281- family with        | 201158 FAM18B2         | 4532        | 15.512        | 3.752         |
| <b>50075 D07</b> | <b>M-025083- KIAA1949</b>    | <b>170954 KIAA1949</b> | <b>4158</b> | <b>22.126</b> | <b>10.366</b> |
| 50075 D08        | M-016483- coiled-coil        | 201134 CCDC46          | 3197        | 3.7222        | 8.0378        |
| 50075 D09        | M-031147- zinc finger        | 170958 ZNF525          | 3319        | 10.093        | 1.667         |
| 50075 D10        | M-016500- mucin 20, c        | 200958 MUC20           | 2777        | 12.495        | 0.735         |
| <b>50075 D11</b> | <b>M-015370- zinc finger</b> | <b>170959 ZNF431</b>   | <b>2324</b> | <b>18.675</b> | <b>6.915</b>  |
| 50075 D12        | M-018492- kelch doma         | 200942 KLHDC8B         | 2630        | 11.597        | 0.163         |
| 50075 D13        | M-023904- ankyrin rep        | 170961 ANKRD24         | 3116        | 13.96         | 2.2           |
| 50075 D14        | M-023542- F-box prote        | 200933 FBXO45          | 1966        | 5.0865        | 6.6735        |
| 50075 D15        | M-012856- additional s       | 171023 ASXL1           | 2422        | 21.429        | 9.669         |
| 50075 D16        | M-017960- organic sol        | 200931 OSTalpha        | 2168        | 11.808        | 0.048         |
| 50075 D17        | M-028243- synaptopo          | 171024 SYNPO2          | 3009        | 14.988        | 3.228         |
| 50075 D18        | M-018951- 5-hydroxyt         | 200909 HTR3D           | 2919        | 9.7636        | 1.9964        |
| 50075 D19        | M-015420- sperm acro         | 171169 SPACA4          | 4177        | 18.171        | 6.411         |
| <b>50075 D20</b> | <b>M-009013- dihydrofol</b>  | <b>200895 DHFRL1</b>   | <b>4535</b> | <b>21.72</b>  | <b>9.96</b>   |
| 50075 D21        | M-015334- NLR family,        | 171389 NLRP6           | 3610        | 15.623        | 3.863         |
| <b>50075 D23</b> | <b>M-015356- zinc finger</b> | <b>171392 ZNF675</b>   | <b>5174</b> | <b>16.796</b> | <b>5.036</b>  |
| 50075 E02        | M-026193- hypothetic         | 169834 LOC169834       | 6671        | 7.4801        | 4.2799        |
| 50075 E04        | M-015621- GLIS family        | 169792 GLIS3           | 4152        | 10.356        | 1.404         |
| 50075 E05        | M-007151- zinc finger        | 162655 ZNF519          | 5136        | 9.1121        | 2.6479        |
| 50075 E06        | M-018803- quiescin Q         | 169714 QSOX2           | 5128        | 18.701        | 6.941         |
| 50075 E07        | M-018519- chromoson          | 162681 C18orf54        | 5363        | 23.121        | 11.361        |
| 50075 E08        | M-016610- chromoson          | 169693 C9orf71         | 2975        | 12.773        | 1.013         |
| 50075 E09        | M-005145- transcriptic       | 162699 TCEB3C          | 2931        | 15.899        | 4.139         |
| 50075 E10        | M-018648- olfactomec         | 169611 OLFML2A         | 2679        | 12.878        | 1.118         |
| 50075 E11        | M-018517- zinc finger        | 162963 ZNF610          | 3554        | 19.865        | 8.105         |
| <b>50075 E12</b> | <b>M-019310- indoleamin</b>  | <b>169355 INDOL1</b>   | <b>3046</b> | <b>26.395</b> | <b>14.635</b> |
| 50075 E13        | M-031845- zinc finger        | 162966 ZNF600          | 2366        | 21.429        | 9.669         |
| 50075 E14        | M-018501- zinc finger        | 169270 ZNF596          | 2371        | 18.22         | 6.46          |
| 50075 E15        | M-031142- zinc finger        | 162967 ZNF320          | 3032        | 10.818        | 0.942         |

|                  |                             |                        |             |               |              |
|------------------|-----------------------------|------------------------|-------------|---------------|--------------|
| 50075 E16        | M-025917- transmemk         | 169200 TMEM64          | 3922        | 10.836        | 0.924        |
| 50075 E17        | M-027216- zinc finger       | 162968 ZNF497          | 3368        | 13.836        | 2.076        |
| <b>50075 E18</b> | <b>M-016021- hypothetic</b> | <b>169166 MGC39715</b> | <b>3622</b> | <b>21.535</b> | <b>9.775</b> |
| 50075 E19        | M-016872- zinc finger       | 162972 ZNF550          | 4919        | 20.817        | 9.057        |
| 50075 E20        | M-025842- collagen, ty      | 169044 COL22A1         | 4277        | 16.203        | 4.443        |
| 50075 E21        | M-016217- zinc finger       | 162979 ZNF342          | 4934        | 12.931        | 1.171        |
| 50075 E23        | M-004422- death effec       | 162989 DEDD2           | 5882        | 12.122        | 0.362        |
| 50075 F02        | M-017365- ADP-ribosy        | 200894 ARL13B          | 5928        | 17.797        | 6.037        |
| 50075 F04        | M-008689- lipase, mer       | 200879 LIPH            | 5244        | 14.359        | 2.599        |
| 50075 F05        | M-018275- citrate lyas      | 171425 CLYBL           | 4881        | 9.5472        | 2.2128       |
| 50075 F06        | M-016612- potassium         | 200845 KCTD6           | 4467        | 15.335        | 3.575        |
| 50075 F07        | M-017931- family with       | 171482 FAM9A           | 3610        | 7.7008        | 4.0592       |
| 50075 F08        | M-027219- FLJ42117 p        | 200844 FLJ42117        | 4067        | 21.957        | 10.197       |
| 50075 F09        | M-031998- family with       | 171483 FAM9B           | 4313        | 11.871        | 0.111        |
| 50075 F10        | M-017436- tigger trans      | 200765 TIGD1           | 3344        | 9.3301        | 2.4299       |
| 50075 F11        | M-017776- family with       | 171484 FAM9C           | 3912        | 10.199        | 1.561        |
| 50075 F12        | M-018590- sprouty-rel       | 200734 SPRED2          | 2929        | 11.779        | 0.019        |
| 50075 F13        | M-017156- chromoson         | 171546 C14orf147       | 2552        | 12.539        | 0.779        |
| 50075 F14        | M-022701- transmemk         | 200728 TMEM17          | 2763        | 11.003        | 0.757        |
| 50075 F15        | M-015503- polymerase        | 171568 POLR3H          | 2664        | 14.264        | 2.504        |
| 50075 F16        | M-017757- keratinocyt       | 200634 KRTCAP3         | 3151        | 7.2675        | 4.4925       |
| 50075 F17        | M-019404- placenta-sp       | 191585 PLAC4           | 2704        | 15.57         | 3.81         |
| 50075 F18        | M-018493- chromoson         | 200558 C2orf13         | 3289        | 14.472        | 2.712        |
| 50075 F19        | M-015919- phosphogly        | 192111 PGAM5           | 3015        | 7.7612        | 3.9988       |
| 50075 F20        | M-017802- ankyrin rep       | 200539 ANKRD23         | 2852        | 16.269        | 4.509        |
| 50075 F21        | M-016388- UDP-GlcNA         | 192134 B3GNT6          | 3314        | 13.096        | 1.336        |
| 50075 F23        | M-016491- HIG1 doma         | 192286 HIGD2A          | 4142        | 9.7537        | 2.0063       |
| 50075 G02        | M-007529- solute carri      | 169026 SLC30A8         | 5470        | 8.0804        | 3.6796       |
| 50075 G04        | M-018503- cyclic nucle      | 168975 CNBD1           | 5392        | 9.069         | 2.691        |
| 50075 G05        | M-031223- hypothetic        | 162993 LOC162993       | 4655        | 13.448        | 1.688        |
| 50075 G06        | M-018115- zinc finger       | 168850 ZNF800          | 4094        | 10.967        | 0.793        |
| 50075 G07        | M-031219- olfactory re      | 162998 OR7D2           | 4625        | 17.276        | 5.516        |
| 50075 G08        | M-021489- BMP bindir        | 168667 BMPER           | 4451        | 12.222        | 0.462        |
| 50075 G09        | M-016640- zinc finger       | 163033 ZNF579          | 3128        | 6.8734        | 4.8866       |
| 50075 G10        | M-009045- basic helix-      | 168620 BHLHB8          | 3196        | 21.777        | 10.017       |
| 50075 G11        | M-015752- zinc finger       | 163049 ZNF791          | 3818        | 7.6742        | 4.0858       |
| 50075 G12        | M-025367- zinc finger       | 168544 ZNF467          | 3887        | 11.86         | 0.1          |
| 50075 G13        | M-016911- zinc finger       | 163050 ZNF564          | 3223        | 17.344        | 5.584        |
| 50075 G14        | M-017612- GTPase, IM        | 168537 GIMAP7          | 2937        | 17.297        | 5.537        |
| 50075 G15        | M-016641- zinc finger       | 163051 ZNF709          | 4360        | 14.151        | 2.391        |
| 50075 G16        | M-017434- polycystic k      | 168507 PKD1L1          | 3781        | 15.234        | 3.474        |
| 50075 G17        | M-017041- zinc finger       | 163059 ZNF433          | 4576        | 18.094        | 6.334        |
| 50075 G18        | M-018049- hypothetic        | 168455 FLJ36031        | 3668        | 10.224        | 1.536        |
| 50075 G19        | M-015908- zinc finger       | 163071 ZNF114          | 5280        | 12.803        | 1.043        |
| 50075 G20        | M-021462- THAP doma         | 168451 THAP5           | 6116        | 12.181        | 0.421        |
| 50075 G21        | M-016451- zinc finger       | 163081 ZNF567          | 4579        | 12.907        | 1.147        |
| 50075 G23        | M-016452- zinc finger       | 163087 ZNF383          | 5159        | 8.6451        | 3.1149       |

|                  |                               |                         |             |               |               |
|------------------|-------------------------------|-------------------------|-------------|---------------|---------------|
| 50075 H02        | M-016189- chromosom           | 200523 C2orf51          | 4474        | 13.098        | 1.338         |
| 50075 H04        | M-018916- gastroke            | 200504 GKN2             | 3969        | 11.262        | 0.498         |
| 50075 H05        | M-021177- keratin 24          | 192666 KRT24            | 5672        | 6.3293        | 5.4307        |
| <b>50075 H06</b> | <b>M-022722- hypothetic</b>   | <b>200424 MGC22014</b>  | <b>4282</b> | <b>37.039</b> | <b>25.279</b> |
| 50075 H07        | M-004640- eukaryotic          | 192669 EIF2C3           | 3581        | 6.8975        | 4.8625        |
| 50075 H08        | M-016277- LOC20042C           | 200420 LOC20042C        | 4644        | 9.087         | 2.673         |
| 50075 H09        | M-004641- eukaryotic          | 192670 EIF2C4           | 4379        | 17.721        | 5.961         |
| 50075 H10        | M-016905- cellular rep        | 200407 CREG2            | 3500        | 10.229        | 1.531         |
| 50075 H11        | M-016650- secretory c         | 192683 SCAMP5           | 2708        | 5.0222        | 6.7378        |
| 50075 H12        | M-015978- hypothetic          | 200403 MGC26733         | 2699        | 16.376        | 4.616         |
| 50075 H13        | M-008869- epidermal i         | 195814 RDHE2            | 2296        | 10.105        | 1.655         |
| 50075 H14        | M-016271- similar to C        | 200383 LOC200383        | 2550        | 9.6863        | 2.0737        |
| 50075 H15        | M-026175- chromosom           | 195827 C9orf21          | 2508        | 15.71         | 3.95          |
| 50075 H16        | M-008849- forkhead b          | 200350 FOXD4L1          | 3105        | 8.5668        | 3.1932        |
| 50075 H17        | M-016034- zinc finger         | 195828 ZNF367           | 3444        | 8.8269        | 2.9331        |
| <b>50075 H18</b> | <b>M-024577- hypothetic</b>   | <b>200321 LOC200321</b> | <b>3774</b> | <b>18.521</b> | <b>6.761</b>  |
| 50075 H19        | M-026409- anthrax tox         | 195977 ANTXRL           | 3511        | 12.105        | 0.345         |
| 50075 H20        | M-016188- hypothetic          | 200317 FLJ23865         | 3737        | 7.8405        | 3.9195        |
| 50075 H21        | M-016943- methyltran          | 196074 METT5D1          | 2826        | 8.351         | 3.409         |
| 50075 H23        | M-026546- hypothetic          | 196264 LOC196264        | 2899        | 3.3115        | 8.4485        |
| 50075 I02        | M-007155- ring finger         | 168433 RNF133           | 4209        | 10.192        | 1.568         |
| 50075 I04        | M-015755- zinc finger         | 168417 ZNF679           | 4327        | 8.2274        | 3.5326        |
| 50075 I05        | M-016453- zinc finger         | 163115 ZNF781           | 5263        | 16.625        | 4.865         |
| 50075 I06        | M-019305- DEAD (Asp-          | 168400 DDX53            | 3812        | 13.694        | 1.934         |
| 50075 I07        | M-016873- EP300 inter         | 163126 EID2             | 5019        | 16.338        | 4.578         |
| 50075 I08        | M-016228- UDP-N-ace           | 168391 GALNTL5          | 3825        | 7.1111        | 4.6489        |
| 50075 I09        | M-015753- hypothetic          | 163154 MGC24975         | 4783        | 14.97         | 3.21          |
| 50075 I10        | M-021315- zinc finger         | 168374 ZNF92            | 4221        | 10.116        | 1.644         |
| 50075 I11        | M-017009- leucine-rich        | 163175 LGI4             | 4483        | 19.853        | 8.093         |
| <b>50075 I12</b> | <b>M-021302- chromosom</b>    | <b>168090 C6orf118</b>  | <b>2677</b> | <b>27.269</b> | <b>15.509</b> |
| 50075 I13        | M-016874- chromosom           | 163183 C19orf46         | 2725        | 7.4862        | 4.2738        |
| 50075 I14        | M-028651- dapper, an          | 168002 DACT2            | 3224        | 14.702        | 2.942         |
| 50075 I15        | M-018515- zinc finger         | 163227 ZNF100           | 3592        | 23.218        | 11.458        |
| <b>50075 I16</b> | <b>M-024703- taxilin beta</b> | <b>167838 TXLNB</b>     | <b>4225</b> | <b>15.408</b> | <b>3.648</b>  |
| 50075 I17        | M-024000- similar to Z        | 163233 LOC163233        | 3454        | 8.8593        | 2.9007        |
| 50075 I18        | M-018595- chromosom           | 167691 C6orf152         | 3653        | 9.2527        | 2.5073        |
| 50075 I19        | M-016454- zinc finger         | 163255 ZNF540           | 5589        | 13.008        | 1.248         |
| 50075 I20        | M-008433- protease, s         | 167681 PRSS35           | 5355        | 14.995        | 3.235         |
| 50075 I21        | M-031846- DENN/MAI            | 163259 DENND2C          | 6025        | 19.054        | 7.294         |
| <b>50075 I23</b> | <b>M-032238- guanylate k</b>  | <b>163351 GBP6</b>      | <b>5428</b> | <b>22.642</b> | <b>10.882</b> |
| 50075 J02        | M-018910- hypothetic          | 200261 LOC200261        | 4002        | 8.6707        | 3.0893        |
| 50075 J04        | M-024178- chromosom           | 200232 C20orf106        | 4299        | 15.097        | 3.337         |
| 50075 J05        | M-005877- IMP1 inner          | 196294 IMM1L            | 3776        | 12.818        | 1.058         |
| 50075 J06        | M-024096- hypothetic          | 200213 LOC200213        | 4369        | 17.35         | 5.59          |
| 50075 J07        | M-031341- doublecort          | 196296 DCDC5            | 3857        | 11.382        | 0.378         |
| 50075 J08        | M-021938- chromosom           | 200205 C1orf69          | 4254        | 13.164        | 1.404         |
| 50075 J09        | M-026768- hypothetic          | 196337 LOC196337        | 4388        | 19.006        | 7.246         |

|           |                         |                  |      |        |        |
|-----------|-------------------------|------------------|------|--------|--------|
| 50075 J10 | M-018885- chromoson     | 200197 C1orf126  | 3382 | 13.276 | 1.516  |
| 50075 J11 | M-017878- keratin 78    | 196374 KRT78     | 3965 | 18.789 | 7.029  |
| 50075 J12 | M-018947- CREB regul    | 200186 CRTC2     | 3540 | 15.254 | 3.494  |
| 50075 J13 | M-027083- dynein, axc   | 196385 DNAH10    | 3305 | 15.34  | 3.58   |
| 50075 J14 | M-017759- keratinocyt   | 200185 KRTCAP2   | 3626 | 10.811 | 0.949  |
| 50075 J15 | M-027056- antagonist    | 196394 AMN1      | 2783 | 11.427 | 0.333  |
| 50075 J16 | M-016973- schlafen-lik  | 200172 SLFNL1    | 3407 | 13.707 | 1.947  |
| 50075 J17 | M-007156- deltex 3 ho   | 196403 DTX3      | 3181 | 10.909 | 0.851  |
| 50075 J18 | M-031973- sperm asso    | 200162 SPAG17    | 4822 | 19.535 | 7.775  |
| 50075 J19 | M-015794- methyltran    | 196410 METTL7B   | 5145 | 10.612 | 1.148  |
| 50075 J20 | M-010305- phospholip    | 200150 PLD5      | 4586 | 9.9433 | 1.8167 |
| 50075 J21 | M-027049- hypothetic    | 196415 LOC196415 | 4275 | 8.8187 | 2.9413 |
| 50075 J23 | M-020839- coiled-coil   | 196441 CCDC131   | 4036 | 4.2864 | 7.4736 |
| 50075 K02 | M-031905- AASA9217      | 167555 UNQ9217   | 3951 | 9.0863 | 2.6737 |
| 50075 K04 | M-015620- zinc finger   | 167465 ZNF366    | 5425 | 9.0138 | 2.7462 |
| 50075 K05 | M-021642- phosphatid    | 163404 PAP2D     | 5834 | 17.415 | 5.655  |
| 50075 K06 | M-018373- Lix1 homol    | 167410 LIX1      | 4819 | 15.626 | 3.866  |
| 50075 K07 | M-018510- fibronectin   | 163479 FNDC7     | 4313 | 12.659 | 0.899  |
| 50075 K08 | M-008425- DCP2 deca     | 167227 DCP2      | 5250 | 14.267 | 2.507  |
| 50075 K09 | M-016923- DENN/MAI      | 163486 DENND1B   | 4912 | 26.608 | 14.848 |
| 50075 K10 | M-018505- PAP associ    | 167153 PAPD4     | 4635 | 18.252 | 6.492  |
| 50075 K11 | M-018507- tudor dom     | 163589 TDRD5     | 3852 | 22.17  | 10.41  |
| 50075 K12 | M-017807- UDP glycos    | 167127 UGT3A2    | 4157 | 17.08  | 5.32   |
| 50075 K13 | M-016470- torsin A int  | 163590 TOR1AIP2  | 3633 | 11.12  | 0.64   |
| 50075 K14 | M-028685- integral me   | 166994 LOC166994 | 4117 | 13.796 | 2.036  |
| 50075 K15 | M-016387- calmodulin    | 163688 CALML6    | 4607 | 15.52  | 3.76   |
| 50075 K16 | M-015619- cell divisior | 166979 CDC20B    | 4386 | 11.696 | 0.064  |
| 50075 K17 | M-016455- chromoson     | 163747 C1orf177  | 4424 | 8.7703 | 2.9897 |
| 50075 K18 | M-018775- sphingomy     | 166929 SGMS2     | 5168 | 11.165 | 0.595  |
| 50075 K19 | M-017737- small prolir  | 163778 SPRR4     | 5225 | 15.12  | 3.36   |
| 50075 K20 | M-016997- hypothetic    | 166863 MGC27016  | 6496 | 21.059 | 9.299  |
| 50075 K21 | M-031887- ankyrin rep   | 163782 ANKRD38   | 5879 | 21.075 | 9.315  |
| 50075 K23 | M-019156- spindle ass   | 163786 SASS6     | 3498 | 8.3476 | 3.4124 |
| 50075 L02 | M-016187- Tctex1 don    | 200132 TCTEX1D1  | 4474 | 9.0076 | 2.7524 |
| 50075 L04 | M-021928- chromoson     | 200095 C1orf67   | 5598 | 11.415 | 0.345  |
| 50075 L05 | M-018829- chromoson     | 196446 C12orf28  | 5282 | 13.044 | 1.284  |
| 50075 L06 | M-016435- hypothetic    | 200058 FLJ23867  | 5384 | 19.781 | 8.021  |
| 50075 L07 | M-018495- hypothetic    | 196463 LOC196463 | 5476 | 8.8386 | 2.9214 |
| 50075 L08 | M-019364- neuroblast    | 200030 NBPF11    | 4870 | 7.0431 | 4.7169 |
| 50075 L09 | M-015825- family with   | 196472 FAM71C    | 6570 | 15.342 | 3.582  |
| 50075 L10 | M-021796- coiled-coil   | 200014 CC2D1B    | 4446 | 11.876 | 0.116  |
| 50075 L11 | M-015795- chromoson     | 196477 C12orf12  | 4364 | 17.851 | 6.091  |
| 50075 L12 | M-007348- solute carri  | 200010 SLC5A9    | 3942 | 16.159 | 4.399  |
| 50075 L13 | M-027344- family with   | 196483 FAM86A    | 3291 | 9.8754 | 1.8846 |
| 50075 L14 | M-021800- CUB domai     | 200008 CDCP2     | 2742 | 10.795 | 0.965  |
| 50075 L15 | M-016372- chromoson     | 196500 C12orf53  | 5191 | 13.215 | 1.455  |
| 50075 L16 | M-018651- chromoson     | 199990 C1orf86   | 4197 | 10.031 | 1.729  |

|                  |                              |                        |             |               |               |
|------------------|------------------------------|------------------------|-------------|---------------|---------------|
| 50075 L17        | M-018776- DCP1 deca          | 196513 DCP1B           | 4451        | 11.256        | 0.504         |
| 50075 L18        | M-009123- cytochrom          | 199974 CYP4Z1          | 4249        | 9.5552        | 2.2048        |
| 50075 L19        | M-027115- AF-1 specif        | 196515 FLJ30092        | 4604        | 9.3397        | 2.4203        |
| 50075 L20        | M-018940- transmemk          | 199964 TMEM61          | 2496        | 9.8558        | 1.9042        |
| 50075 L21        | M-003867- transmemk          | 196527 TMEM16F         | 4972        | 9.7949        | 1.9651        |
| 50075 L23        | M-026945- AT rich inte       | 196528 ARID2           | 5078        | 9.8858        | 1.8742        |
| 50075 M02        | M-018468- Ras associa        | 166824 RASSF6          | 4664        | 5.3816        | 6.3784        |
| 50075 M04        | M-017437- tigger trans       | 166815 TIGD2           | 3524        | 9.336         | 2.424         |
| 50075 M05        | M-016456- chromoson          | 163859 C1orf55         | 2714        | 8.622         | 3.138         |
| <b>50075 M06</b> | <b>M-007154- zinc finger</b> | <b>166793 ZNF509</b>   | <b>4846</b> | <b>22.967</b> | <b>11.207</b> |
| 50075 M07        | M-017181- chromoson          | 163882 C1orf71         | 6604        | 16.172        | 4.412         |
| 50075 M08        | M-007153- tripartite r       | 166655 TRIM60          | 6216        | 8.269         | 3.491         |
| 50075 M09        | M-032035- family with        | 163933 FAM43B          | 6071        | 7.2146        | 4.5454        |
| 50075 M10        | M-024221- G protein-c        | 166647 GPR125          | 5993        | 6.7913        | 4.9687        |
| 50075 M11        | M-009902- peptidylprc        | 164022 PPIAL4          | 6069        | 11.155        | 0.605         |
| 50075 M12        | M-015617- Bardet-Bier        | 166379 BBS12           | 3996        | 19.77         | 8.01          |
| 50075 M13        | M-021627- HFM1, ATP          | 164045 HFM1            | 3117        | 9.5605        | 2.1995        |
| 50075 M14        | M-008418- spermatog          | 166378 SPATA5          | 3069        | 10.231        | 1.529         |
| 50075 M15        | M-017182- chromoson          | 164127 C1orf65         | 5416        | 15.214        | 3.454         |
| 50075 M16        | M-032036- kelch doma         | 166348 KLHDC6          | 4789        | 7.0161        | 4.7439        |
| 50075 M17        | M-017589- WAP four-c         | 164237 WFDC13          | 3597        | 5.9494        | 5.8106        |
| 50075 M18        | M-023495- prickle hon        | 166336 PRICKLE2        | 4517        | 13.017        | 1.257         |
| 50075 M19        | M-015754- adenomatc          | 164284 APCDD1L         | 4606        | 11.572        | 0.188         |
| 50075 M20        | M-009047- carbohydra         | 166012 CHST13          | 4864        | 14.679        | 2.919         |
| 50075 M21        | M-017183- chromoson          | 164312 C20orf75        | 4423        | 11.282        | 0.478         |
| 50075 M23        | M-024287- tubulin tyr        | 164395 TTL9            | 3584        | 3.5993        | 8.1607        |
| 50075 N02        | M-027481- hypothetic         | 199899 LOC199899       | 4032        | 8.4573        | 3.3027        |
| 50075 N04        | M-016433- family with        | 199870 FAM76A          | 4083        | 12.172        | 0.412         |
| 50075 N05        | M-016238- similar to h       | 196549 LOC196549       | 5204        | 5.9185        | 5.8415        |
| 50075 N06        | M-017007- asparagine         | 199857 ALG14           | 4540        | 7.4009        | 4.3591        |
| 50075 N07        | M-016150- chromoson          | 196740 C10orf72        | 4190        | 9.4272        | 2.3328        |
| 50075 N08        | M-010977- late cornifi       | 199834 LCE4A           | 3876        | 10.243        | 1.517         |
| 50075 N09        | M-008470- polyamine          | 196743 PAOX            | 4654        | 14.224        | 2.464         |
| 50075 N10        | M-031132- hypothetic         | 199800 LOC199800       | 5137        | 12.712        | 0.952         |
| 50075 N11        | M-015799- family with        | 196792 FAM24B          | 4823        | 9.2266        | 2.5334        |
| 50075 N12        | M-010692- family with        | 199786 FAM129C         | 4126        | 5.1381        | 6.6219        |
| 50075 N13        | M-021957- hypothetic         | 196913 LOC196913       | 3279        | 11.131        | 0.629         |
| 50075 N14        | M-016244- zinc finger        | 199777 ZNF626          | 5240        | 16.031        | 4.271         |
| 50075 N15        | M-016412- chromoson          | 196951 C15orf33        | 4647        | 5.7241        | 6.0359        |
| 50075 N16        | M-017011- U2 small nu        | 199746 U2AF1L4         | 5529        | 3.9067        | 7.8533        |
| <b>50075 N17</b> | <b>M-019306- chromoson</b>   | <b>196968 C15orf51</b> | <b>3708</b> | <b>13.754</b> | <b>1.994</b>  |
| 50075 N18        | M-021459- THAP doma          | 199745 THAP8           | 3982        | 6.5043        | 5.2557        |
| 50075 N19        | M-022265- hypothetic         | 196993 LOC196993       | 5413        | 12.895        | 1.135         |
| 50075 N20        | M-004302- cell adhesic       | 199731 CADM4           | 4371        | 5.9483        | 5.8117        |
| 50075 N21        | M-022268- GRAM dom           | 196996 GRAMD2          | 4536        | 6.5917        | 5.1683        |
| 50075 N23        | M-030411- hypothetic         | 197003 MGC15885        | 3399        | 6.5313        | 5.2287        |
| 50075 O02        | M-007152- ring finger        | 165918 RNF168          | 5054        | 13.376        | 1.616         |

|           |                        |                  |        |         |         |
|-----------|------------------------|------------------|--------|---------|---------|
| 50075 O04 | M-019311- cardiomyo    | 165904 CMYA1     | 2438   | 12.551  | 0.791   |
| 50075 O05 | M-018314- coiled-coil  | 164592 CCDC116   | 4297   | 10.566  | 1.194   |
| 50075 O06 | M-016875- DnaJ (Hsp4   | 165721 DNAJB8    | 5759   | 16.982  | 5.222   |
| 50075 O07 | M-018982- calcium bir  | 164633 CABP7     | 4472   | 10.756  | 1.004   |
| 50075 O08 | M-017186- poly (ADP-i  | 165631 PARP15    | 3885   | 6.0489  | 5.7111  |
| 50075 O09 | M-006052- transmemk    | 164656 TMPRSS6   | 3009   | 9.0395  | 2.7205  |
| 50075 O10 | M-015380- DEAQ box     | 165545 DQX1      | 4806   | 14.128  | 2.368   |
| 50075 O11 | M-019144- apolipopro   | 164668 APOBEC3H  | 2582   | 9.45    | 2.31    |
| 50075 O12 | M-010967- C-type lecti | 165530 CLEC4F    | 3323   | 16.642  | 4.882   |
| 50075 O13 | M-017184- WBP2 N-te    | 164684 WBP2NL    | 3264   | 11.734  | 0.026   |
| 50075 O14 | M-019140- UBX domai    | 165324 UBXD4     | 3914   | 7.6392  | 4.1208  |
| 50075 O15 | M-017857- WD repeat    | 164781 WDR69     | 4310   | 22.831  | 11.071  |
| 50075 O16 | M-018745- complemei    | 165257 C1QL2     | 4826   | 15.893  | 4.133   |
| 50075 O17 | M-027218- LON peptid   | 164832 LONRF2    | 3178   | 7.5205  | 4.2395  |
| 50075 O18 | M-018304- KIAA1946     | 165215 KIAA1946  | 5365   | 11.892  | 0.132   |
| 50075 O19 | M-016986- coiled-coil  | 165055 CCDC138   | 5812   | 16.655  | 4.895   |
| 50075 O20 | M-027280- similar to R | 165186 LOC165186 | 5132   | 12.763  | 1.003   |
| 50075 O21 | M-023118- hypothetic   | 165057 FLJ39061  | 4560   | 8.0263  | 3.7337  |
| 50075 O23 | M-017185- hypothetic   | 165100 MGC35154  | 3146   | 8.932   | 2.828   |
| 50075 P02 | M-019177- gametogen    | 199720 GGN       | 5      | 40      | 28.24   |
| 50075 P04 | M-023619- hypothetic   | 199714 MGC35045  | 4691   | 8.8894  | 2.8706  |
| 50075 P05 | M-022259- lactase-like | 197021 LCTL      | 2649   | 14.76   | 3       |
| 50075 P06 | M-016890- NLR family,  | 199713 NLRP7     | 2699   | 15.154  | 3.394   |
| 50075 P07 | M-030657- hypothetic   | 197187 MGC23284  | 4535   | 11.621  | 0.139   |
| 50075 P08 | M-016432- zinc finger  | 199704 ZNF585A   | 2848   | 9.691   | 2.069   |
| 50075 P09 | M-016611- transmemk    | 197196 TMEM148   | 4230   | 6.1229  | 5.6371  |
| 50075 P10 | M-016415- DAN doma     | 199699 DAND5     | 3663   | 10.893  | 0.867   |
| 50075 P11 | M-008761- lactate deh  | 197257 LDHD      | 2892   | 9.8893  | 1.8707  |
| 50075 P12 | M-017826- chromoson    | 199675 C19orf59  | 2216   | 13.538  | 1.778   |
| 50075 P13 | M-018832- zinc finger  | 197320 ZNF778    | 2351   | 21.182  | 9.422   |
| 50075 P14 | M-016484- tetratricop  | 199223 TTC21A    | 3315   | 7.632   | 4.128   |
| 50075 P15 | M-017808- hypothetic   | 197322 LOC197322 | 3692   | 6.6631  | 5.0969  |
| 50075 P16 | M-018494- DAZ intera   | 199221 DZIP1L    | 1824   | 6.0307  | 5.7293  |
| 50075 P17 | M-017531- WD repeat    | 197335 WDR90     | 2928   | 9.1872  | 2.5728  |
| 50075 P18 | M-016413- zinc finger  | 197407 ZNF553    | 2719   | 18.205  | 6.445   |
| 50075 P19 | M-021344- similar to R | 197336 LOC197336 | 2822   | 8.6109  | 3.1491  |
| 50075 P20 | M-007157- non-SMC e    | 197370 NSMCE1    | 3981   | 8.8671  | 2.8929  |
| 50075 P21 | M-022614- hypothetic   | 197350 LOC197350 | 2904   | 11.433  | 0.327   |
| 50075 P23 | M-008796- NLR family,  | 197358 NLRC3     | 2047   | 6.8393  | 4.9207  |
|           |                        | MAD              | 3946.5 | 11.7565 | 3.242   |
|           |                        | MAD3             |        |         | 9.726   |
|           |                        | MADc             |        |         | 4.79816 |
| 50075 C22 |                        |                  | 4627   | 47.439  |         |
| 50075 D22 |                        |                  | 3571   | 42.733  |         |
| 50075 E22 |                        |                  | 4167   | 50.204  |         |
| 50075 F22 |                        |                  | 3721   | 45.364  |         |
|           |                        | mn               | 4021.5 | 46.435  |         |

|           |                                    |      |           |          |          |
|-----------|------------------------------------|------|-----------|----------|----------|
|           |                                    |      | sd        | 476.463  | 3.165713 |
| 50075 G22 |                                    |      |           | 2167     | 6.1375   |
| 50075 H22 |                                    |      |           | 1642     | 6.0901   |
| 50075 I22 |                                    |      |           | 2767     | 10.481   |
| 50075 J22 |                                    |      |           | 2196     | 5.4189   |
|           |                                    |      | mn        | 2193     | 7.031875 |
|           |                                    |      | sd        | 459.6238 | 2.322714 |
|           |                                    |      | 3psSD     |          | 6.968141 |
|           |                                    |      | 3ngSD     |          | 9.49714  |
|           |                                    |      | SumSD     |          | 16.46528 |
|           |                                    |      | DiffMn    |          | 39.40313 |
|           |                                    |      | SmovrDiff |          | 0.417867 |
|           |                                    |      | 1minus    |          | 0.582133 |
| 50075 G03 | M-003290- polo-like ki             | 5347 | PLK1 SMAR | 682      | 11.584   |
| 50075 H03 | M-003290- polo-like ki             | 5347 | PLK1 SMAR | 973      | 12.436   |
| 50075 I03 | D-001206-: siControl non-targeting |      |           | 4854     | 17.347   |
| 50075 J03 | D-001206-: siControl non-targeting |      |           | 2622     | 10.984   |
| 50075 K03 | D-001600-( siGLO RISC-free siRNA   |      |           | 6496     | 24.092   |
| 50075 L03 | D-001600-( siGLO RISC-free siRNA   |      |           | 6444     | 22.408   |

| rZ       | cell ct | % inf   | AD      | rZ       | cell ct | % inf  | AD     | rZ       |
|----------|---------|---------|---------|----------|---------|--------|--------|----------|
| -2.20553 | 2093    | 5.8767  | 3.6133  | -0.8577  | 3767    | 7.433  | 3.407  | -0.69304 |
| 0.328355 | 3956    | 12.968  | 3.478   | 0.825393 | 5875    | 22.502 | 11.662 | 2.373151 |
| 1.230367 | 3352    | 15.334  | 5.844   | 1.386953 | 4331    | 18.702 | 7.862  | 1.599939 |
| -0.50015 | 2578    | 7.6416  | 1.8484  | -0.4388  | 2600    | 11.538 | 0.698  | 0.14223  |
| -0.71023 | 2201    | 8.6324  | 0.8576  | -0.20364 | 3024    | 12.136 | 1.296  | 0.26391  |
| -1.03602 | 2481    | 7.6582  | 1.8318  | -0.43486 | 2889    | 11.423 | 0.583  | 0.118831 |
| -0.16704 | 3535    | 11.089  | 1.599   | 0.379421 | 3048    | 18.602 | 7.762  | 1.579591 |
| 0.245823 | 2751    | 13.74   | 4.25    | 1.008624 | 3063    | 25.955 | 15.115 | 3.075757 |
| -0.4499  | 3621    | 11.765  | 2.275   | 0.539866 | 3234    | 17.718 | 6.878  | 1.399718 |
| -0.66027 | 3383    | 3.6063  | 5.8837  | -1.39657 | 2205    | 8.5261 | 2.3139 | -0.47062 |
| -1.09688 | 2645    | 7.9395  | 1.5505  | -0.3681  | 3079    | 8.4768 | 2.3632 | -0.48065 |
| -0.50611 | 3060    | 7.5163  | 1.9737  | -0.46854 | 2495    | 16.834 | 5.994  | 1.219844 |
| 1.073224 | 3700    | 10.297  | 0.807   | 0.191443 | 3322    | 17.971 | 7.131  | 1.451197 |
| 1.225574 | 4393    | 8.2404  | 1.2496  | -0.29668 | 4263    | 9.8288 | 1.0112 | -0.20555 |
| -0.01136 | 2895    | 8.532   | 0.958   | -0.22747 | 3368    | 13.361 | 2.521  | 0.513169 |
| 0.291466 | 4670    | 12.484  | 2.994   | 0.710518 | 3468    | 14.937 | 4.097  | 0.833848 |
| -0.64391 | 3018    | 7.5878  | 1.9022  | -0.45157 | 2754    | 11.765 | 0.925  | 0.18842  |
| -0.53127 | 1478    | 9.8782  | 0.3882  | 0.092043 | 2818    | 13.414 | 2.574  | 0.523953 |
| -0.63443 | 2624    | 17.797  | 8.307   | 1.971536 | 4599    | 19.156 | 8.316  | 1.692318 |
| -1.463   | 2902    | 7.6154  | 1.8746  | -0.44502 | 2050    | 15.561 | 4.721  | 0.960818 |
| -1.28954 | 4607    | 7.0979  | 2.3921  | -0.56785 | 5737    | 10.528 | 0.312  | -0.06328 |
| -1.21411 | 6278    | 6.3555  | 3.1345  | -0.74405 | 3628    | 5.237  | 5.603  | -1.13988 |
| -0.94278 | 4075    | 5.7423  | 3.7477  | -0.8896  | 3568    | 10.006 | 0.834  | -0.1695  |
| 0.957555 | 5299    | 12.399  | 2.909   | 0.690344 | 3785    | 17.384 | 6.544  | 1.331757 |
| -0.55955 | 4515    | 4.4075  | 5.0825  | -1.2064  | 3355    | 5.9911 | 4.8489 | -0.98644 |
| -1.56362 | 3312    | 3.2005  | 6.2895  | -1.49288 | 1664    | 6.6106 | 4.2294 | -0.86038 |
| 0.677864 | 4027    | 12.739  | 3.249   | 0.771041 | 3713    | 18.126 | 7.286  | 1.482736 |
| -0.26646 | 3450    | 4.7826  | 4.7074  | -1.11738 | 2942    | 15.058 | 4.218  | 0.858469 |
| -0.2254  | 2643    | 5.4862  | 4.0038  | -0.95038 | 1255    | 24.143 | 13.303 | 2.707057 |
| -1.25296 | 2455    | 3.8289  | 5.6611  | -1.34373 | 2638    | 8.3397 | 2.5003 | -0.50855 |
| 1.278303 | 5059    | 13.422  | 3.932   | 0.933148 | 3493    | 29.259 | 18.419 | 3.748045 |
| 0.678072 | 4990    | 9.7996  | 0.3096  | 0.073387 | 3613    | 13.784 | 2.944  | 0.59924  |
| 2.244298 | 5523    | 14.919  | 5.429   | 1.288455 | 2882    | 13.602 | 2.762  | 0.562207 |
| 1.099692 | 6026    | 10.969  | 1.479   | 0.350939 | 3560    | 17.051 | 6.211  | 1.263999 |
| -0.2181  | 3122    | 9.1288  | 0.3612  | -0.08582 | 2489    | 13.941 | 3.101  | 0.631185 |
| -0.11744 | 4913    | 9.9125  | 0.4225  | 0.100184 | 4139    | 10.993 | 0.153  | 0.031335 |
| -1.48561 | 4300    | 11.395  | 1.905   | 0.452049 | 2786    | 5.5276 | 5.3124 | -1.08075 |
| -0.58579 | 3668    | 12.459  | 2.969   | 0.704584 | 3799    | 16.504 | 5.664  | 1.152697 |
| -0.38494 | 4406    | 12.506  | 3.016   | 0.71574  | 4926    | 14.84  | 4      | 0.814111 |
| 0.525097 | 4834    | 11.46   | 1.97    | 0.467476 | 5864    | 14.905 | 4.065  | 0.827337 |
| 0.939423 | 4212    | 3.0152  | 6.4748  | -1.53686 | 5642    | 14.286 | 3.446  | 0.701385 |
| -0.16371 | 4333    | 0.90007 | 8.58993 | -2.03888 | 5373    | 10.776 | 0.064  | -0.01282 |
| 1.68054  | 4711    | 4.2242  | 5.2658  | -1.24991 | 3736    | 13.597 | 2.757  | 0.561189 |
| 2.289523 | 5319    | 4.1173  | 5.3727  | -1.27528 | 3946    | 11.759 | 0.919  | 0.187199 |
| 1.533192 | 5114    | 4.9276  | 4.5624  | -1.08296 | 2961    | 9.5238 | 1.3162 | -0.26761 |
| 0.755602 | 4283    | 4.5295  | 4.9605  | -1.17745 | 2636    | 15.099 | 4.259  | 0.866812 |



|                 |             |               |               |                 |             |               |               |                 |
|-----------------|-------------|---------------|---------------|-----------------|-------------|---------------|---------------|-----------------|
| 1.303312        | 4844        | 6.3584        | 3.1316        | -0.74337        | 3428        | 11.464        | 0.624         | 0.127173        |
| 0.377124        | 3613        | 3.1276        | 6.3624        | -1.51018        | 1632        | 6.25          | 4.59          | -0.93376        |
| 1.726599        | 3787        | 5.2284        | 4.2616        | -1.01157        | 2544        | 10.574        | 0.266         | -0.05392        |
| 1.570498        | 3482        | 4.4515        | 5.0385        | -1.19596        | 2986        | 10.851        | 0.011         | 0.002442        |
| 1.362918        | 3295        | 4.4613        | 5.0287        | -1.19364        | 2143        | 9.6127        | 1.2273        | -0.24952        |
| 0.358783        | 4489        | 6.6384        | 2.8516        | -0.67691        | 2803        | 10.275        | 0.565         | -0.11476        |
| 0.075967        | 3277        | 6.5609        | 2.9291        | -0.6953         | 1826        | 9.8576        | 0.9824        | -0.19969        |
| 2.711977        | 3637        | 6.7363        | 2.7537        | -0.65367        | 2094        | 18.529        | 7.689         | 1.564738        |
| -0.14037        | 4262        | 6.2177        | 3.2723        | -0.77676        | 1868        | 9.3148        | 1.5252        | -0.31014        |
| 0.682866        | 3828        | 8.3072        | 1.1828        | -0.28083        | 1795        | 9.805         | 1.035         | -0.2104         |
| -0.0743         | 3812        | 7.1616        | 2.3284        | -0.55273        | 3733        | 6.2952        | 4.5448        | -0.92456        |
| 0.980688        | 5435        | 9.6964        | 0.2064        | 0.048893        | 4961        | 9.1917        | 1.6483        | -0.33519        |
| -0.28188        | 5873        | 9.1946        | 0.2954        | -0.07021        | 3904        | 7.582         | 3.258         | -0.66272        |
| 1.112197        | 4722        | 18.149        | 8.659         | 2.055081        | 4606        | 15.241        | 4.401         | 0.895705        |
| -1.97163        | 5162        | 4.2813        | 5.2087        | -1.23636        | 4565        | 3.7021        | 7.1379        | -1.45219        |
| -1.25217        | 5493        | 7.1546        | 2.3354        | -0.55439        | 5125        | 9.5415        | 1.2985        | -0.26401        |
| -1.3591         | 5958        | 8.006         | 1.484         | -0.35232        | 4351        | 2.9878        | 7.8522        | -1.59754        |
| 0.782696        | 6754        | 21.913        | 12.423        | 2.94845         | 4630        | 13.693        | 2.853         | 0.580723        |
| <b>2.161141</b> | <b>5901</b> | <b>18.387</b> | <b>8.897</b>  | <b>2.11157</b>  | <b>4290</b> | <b>9.627</b>  | <b>1.213</b>  | <b>-0.24661</b> |
| -1.67445        | 4178        | 8.2815        | 1.2085        | -0.28693        | 2772        | 3.5354        | 7.3046        | -1.48611        |
| -0.3467         | 5858        | 8.9109        | 0.5791        | -0.13754        | 4516        | 11.492        | 0.652         | 0.13287         |
| 0.153913        | 6419        | 14.099        | 4.609         | 1.093831        | 4022        | 10.567        | 0.273         | -0.05535        |
| <b>1.441907</b> | <b>4977</b> | <b>18.927</b> | <b>9.437</b>  | <b>2.239736</b> | <b>2742</b> | <b>24.435</b> | <b>13.595</b> | <b>2.766472</b> |
| -0.03324        | 3372        | 6.3167        | 3.1733        | -0.75326        | 1934        | 9.7208        | 1.1192        | -0.22753        |
| 0.459239        | 4932        | 8.1711        | 1.3189        | -0.31313        | 3032        | 9.7625        | 1.0775        | -0.21904        |
| -1.39012        | 4988        | 3.2478        | 6.2422        | -1.48165        | 2282        | 2.2349        | 8.6051        | -1.75074        |
| 2.015877        | 6313        | 16.727        | 7.237         | 1.717576        | 3403        | 23.597        | 12.757        | 2.595959        |
| 0.010733        | 5656        | 11.97         | 2.48          | 0.588522        | 2282        | 12.445        | 1.605         | 0.326784        |
| 0.673487        | 6147        | 10.883        | 1.393         | 0.330528        | 3964        | 16.372        | 5.532         | 1.125838        |
| -0.41535        | 6067        | 8.3402        | 1.1498        | -0.27299        | 2906        | 11.356        | 0.516         | 0.105198        |
| 1.336867        | 6091        | 12.789        | 3.299         | 0.782908        | 4011        | 16.006        | 5.166         | 1.051365        |
| <b>2.076525</b> | <b>7396</b> | <b>24.486</b> | <b>14.996</b> | <b>3.559141</b> | <b>4360</b> | <b>17.087</b> | <b>6.247</b>  | <b>1.271324</b> |
| 0.80583         | 5343        | 17.294        | 7.804         | 1.852151        | 4010        | 20.224        | 9.384         | 1.909631        |
| <b>1.050298</b> | <b>6132</b> | <b>24.119</b> | <b>14.629</b> | <b>3.472035</b> | <b>6177</b> | <b>25.805</b> | <b>14.965</b> | <b>3.045236</b> |
| -0.89126        | 6362        | 5.8315        | 3.6585        | -0.86842        | 6485        | 15.621        | 4.781         | 0.973027        |
| -0.29188        | 4637        | 4.5288        | 4.9612        | -1.17761        | 2891        | 8.1287        | 2.7113        | -0.55148        |
| -0.55113        | 4569        | 3.9177        | 5.5723        | -1.32266        | 4334        | 10.083        | 0.757         | -0.15383        |
| 1.447326        | 5647        | 6.7469        | 2.7431        | -0.65116        | 4326        | 20.989        | 10.149        | 2.065291        |
| 2.368512        | 6079        | 5.7082        | 3.7818        | -0.89769        | 3550        | 20.338        | 9.498         | 1.932827        |
| 0.211852        | 5448        | 7.5808        | 1.9092        | -0.45324        | 2820        | 10.603        | 0.237         | -0.04802        |
| 0.863352        | 5279        | 4.3758        | 5.1142        | -1.21393        | 2750        | 15.527        | 4.687         | 0.9539          |
| 0.233735        | 3376        | 4.1469        | 5.3431        | -1.26826        | 2834        | 21.348        | 10.508        | 2.138339        |
| 1.689919        | 4985        | 5.9579        | 3.5321        | -0.83842        | 3023        | 10.023        | 0.817         | -0.16604        |
| <b>3.050857</b> | <b>4646</b> | <b>12.118</b> | <b>2.628</b>  | <b>0.62365</b>  | <b>2813</b> | <b>29.897</b> | <b>19.057</b> | <b>3.877863</b> |
| 2.015877        | 4699        | 12.088        | 2.598         | 0.616529        | 3187        | 20.835        | 9.995         | 2.033955        |
| 1.347079        | 4925        | 6.0102        | 3.4798        | -0.82601        | 3223        | 11.387        | 0.547         | 0.111505        |
| -0.1956         | 5122        | 5.2714        | 4.2186        | -1.00136        | 2995        | 12.654        | 1.814         | 0.369311        |

|                 |             |               |              |                 |             |               |               |                 |
|-----------------|-------------|---------------|--------------|-----------------|-------------|---------------|---------------|-----------------|
| -0.19184        | 4605        | 5.1683        | 4.3217       | -1.02583        | 2968        | 11.894        | 1.054         | 0.214668        |
| 0.433395        | 3840        | 4.6354        | 4.8546       | -1.15231        | 2511        | 9.4783        | 1.3617        | -0.27687        |
| <b>2.037969</b> | <b>5044</b> | <b>13.224</b> | <b>3.734</b> | <b>0.886154</b> | <b>3590</b> | <b>22.173</b> | <b>11.333</b> | <b>2.306208</b> |
| 1.888328        | 5328        | 11.205        | 1.715        | 0.406953        | 4136        | 19.802        | 8.962         | 1.823764        |
| 0.926709        | 5875        | 11.966        | 2.476        | 0.587573        | 3521        | 18.773        | 7.933         | 1.614386        |
| 0.244781        | 5614        | 7.8019        | 1.6881       | -0.40076        | 3225        | 9.2093        | 1.6307        | -0.33161        |
| 0.076175        | 5813        | 7.036         | 2.454        | -0.58254        | 6469        | 14.608        | 3.768         | 0.766905        |
| 1.25892         | 5856        | 17.657        | 8.167        | 1.938307        | 5666        | 12.46         | 1.62          | 0.329836        |
| 0.542395        | 5439        | 11.951        | 2.461        | 0.584013        | 5169        | 11.008        | 0.168         | 0.034388        |
| -0.46045        | 3630        | 8.0165        | 1.4735       | -0.34982        | 3922        | 5.8899        | 4.9501        | -1.00703        |
| 0.745807        | 5328        | 14.94         | 5.45         | 1.293439        | 4840        | 14.442        | 3.602         | 0.733127        |
| -0.84526        | 4297        | 10.472        | 0.982        | 0.232979        | 3298        | 7.641         | 3.199         | -0.65072        |
| 2.125919        | 5032        | 14.865        | 5.375        | 1.275638        | 4084        | 15.622        | 4.782         | 0.97323         |
| 0.023863        | 5449        | 12.131        | 2.641        | 0.626735        | 4636        | 8.9733        | 1.8667        | -0.37963        |
| -0.50569        | 4561        | 7.1914        | 2.2986       | -0.54566        | 3673        | 23.822        | 12.982        | 2.641741        |
| -0.3246         | 4235        | 9.6576        | 0.1676       | 0.039684        | 3314        | 9.0223        | 1.8177        | -0.36966        |
| 0.004689        | 4379        | 11.076        | 1.586        | 0.376335        | 3234        | 5.3185        | 5.5215        | -1.12329        |
| 0.163083        | 4395        | 12.332        | 2.842        | 0.674441        | 4036        | 9.1675        | 1.6725        | -0.34011        |
| -0.15704        | 4142        | 10.357        | 0.867        | 0.205684        | 2351        | 9.698         | 1.142         | -0.23217        |
| 0.522596        | 4176        | 20.618        | 11.128       | 2.641088        | 2878        | 20.188        | 9.348         | 1.902306        |
| -0.93557        | 6003        | 8.4958        | 0.9942       | -0.23606        | 3343        | 6.6707        | 4.1693        | -0.84815        |
| 0.794784        | 4982        | 16.038        | 6.548        | 1.554045        | 3184        | 13.222        | 2.382         | 0.484886        |
| 0.565946        | 5861        | 13.087        | 3.597        | 0.853637        | 4130        | 11.695        | 0.855         | 0.174176        |
| -0.83267        | 5742        | 8.3595        | 1.1305       | -0.26841        | 4317        | 5.9069        | 4.9331        | -1.00357        |
| 0.940465        | 4033        | 17.307        | 7.817        | 1.855236        | 3224        | 13.555        | 2.715         | 0.552643        |
| 0.27917         | 4876        | 14.848        | 5.358        | 1.271603        | 5027        | 13.825        | 2.985         | 0.607582        |
| -0.41741        | 5937        | 15.766        | 6.276        | 1.489487        | 4885        | 13.327        | 2.487         | 0.506251        |
| -0.76615        | 4725        | 12.127        | 2.637        | 0.625786        | 5740        | 11.063        | 0.223         | 0.045579        |
| -0.56011        | 5288        | 13.294        | 3.804        | 0.902768        | 5916        | 10.311        | 0.529         | -0.10744        |
| 0.352531        | 3701        | 17.914        | 8.424        | 1.999305        | 4543        | 10.302        | 0.538         | -0.10927        |
| -0.16454        | 3766        | 7.3818        | 2.1082       | -0.50047        | 4686        | 6.9996        | 3.8404        | -0.78123        |
| 1.150337        | 4121        | 11.017        | 1.527        | 0.362332        | 5391        | 7.7908        | 3.0492        | -0.62024        |
| 0.097016        | 3782        | 9.4923        | 0.0023       | 0.000451        | 4870        | 7.1253        | 3.7147        | -0.75565        |
| -1.0177         | 4313        | 7.4194        | 2.0706       | -0.49154        | 4070        | 7.8133        | 3.0267        | -0.61566        |
| 2.088405        | 3901        | 15.381        | 5.891        | 1.398108        | 4432        | 10.672        | 0.168         | -0.03398        |
| -0.85081        | 3423        | 10.926        | 1.436        | 0.340733        | 4474        | 13.299        | 2.459         | 0.500553        |
| 0.021571        | 3380        | 5.4142        | 4.0758       | -0.96747        | 2416        | 5.0911        | 5.7489        | -1.16957        |
| 1.164509        | 4385        | 15.507        | 6.017        | 1.428014        | 3667        | 11.699        | 0.859         | 0.17499         |
| 1.154713        | 2987        | 11.65         | 2.16         | 0.512572        | 3708        | 6.5534        | 4.2866        | -0.87202        |
| 0.499045        | 4559        | 6.1198        | 3.3702       | -0.8            | 4123        | 6.9124        | 3.9276        | -0.79897        |
| 0.724757        | 5128        | 12.5          | 3.01         | 0.714316        | 3541        | 13.781        | 2.941         | 0.598629        |
| 1.320819        | 4607        | 9.4422        | 0.0478       | -0.01144        | 4181        | 9.3997        | 1.4403        | -0.29286        |
| -0.31939        | 4797        | 9.7353        | 0.2453       | 0.058126        | 4422        | 5.9023        | 4.9377        | -1.0045         |
| 0.218104        | 4987        | 10.227        | 0.737        | 0.174829        | 5163        | 10.304        | 0.536         | -0.10886        |
| 0.088471        | 5310        | 16.591        | 7.101        | 1.685297        | 5462        | 11.553        | 0.713         | 0.145283        |
| 0.239779        | 3342        | 9.9042        | 0.4142       | 0.098214        | 4297        | 7.5169        | 3.3231        | -0.67597        |
| -0.64846        | 5743        | 11.806        | 2.316        | 0.549598        | 4359        | 6.5382        | 4.3018        | -0.87511        |

|                 |             |               |               |                 |             |               |               |                 |
|-----------------|-------------|---------------|---------------|-----------------|-------------|---------------|---------------|-----------------|
| 0.279586        | 4495        | 6.9855        | 2.5045        | -0.59453        | 4450        | 11.438        | 0.598         | 0.121883        |
| -0.10306        | 3050        | 10.918        | 1.428         | 0.338835        | 3870        | 16.925        | 6.085         | 1.238361        |
| -1.1311         | 3983        | 3.7409        | 5.7491        | -1.36462        | 5431        | 10.992        | 0.152         | 0.031132        |
| <b>5.269207</b> | <b>3336</b> | <b>24.281</b> | <b>14.791</b> | <b>3.510485</b> | <b>3890</b> | <b>40.026</b> | <b>29.186</b> | <b>5.938881</b> |
| -1.01268        | 4233        | 12.733        | 3.243         | 0.769617        | 5176        | 21.522        | 10.682        | 2.173744        |
| -0.55636        | 4675        | 5.1551        | 4.3349        | -1.02896        | 5057        | 17.58         | 6.74          | 1.371638        |
| 1.243081        | 3608        | 9.3404        | 0.1496        | -0.0356         | 3061        | 16.629        | 5.789         | 1.178131        |
| -0.31835        | 3108        | 9.3308        | 0.1592        | -0.03788        | 3370        | 12.7          | 1.86          | 0.378671        |
| -1.40352        | 2507        | 6.5417        | 2.9483        | -0.69986        | 2574        | 15.385        | 4.545         | 0.925006        |
| 0.962765        | 3611        | 16.284        | 6.794         | 1.612432        | 3041        | 21.736        | 10.896        | 2.217288        |
| -0.34419        | 3531        | 8.4962        | 0.9938        | -0.23597        | 3638        | 12.974        | 2.134         | 0.434423        |
| -0.43146        | 3927        | 11.332        | 1.842         | 0.437096        | 3093        | 22.729        | 11.889        | 2.419341        |
| 0.823962        | 3460        | 16.301        | 6.811         | 1.616466        | 3199        | 24.758        | 13.918        | 2.832195        |
| -0.66478        | 2781        | 6.041         | 3.449         | -0.8187         | 2238        | 9.6515        | 1.1885        | -0.24163        |
| -0.61057        | 4211        | 6.673         | 2.817         | -0.6687         | 4091        | 10.144        | 0.696         | -0.14142        |
| <b>1.409811</b> | <b>4844</b> | <b>21.243</b> | <b>11.753</b> | <b>2.789429</b> | <b>4680</b> | <b>30.128</b> | <b>19.288</b> | <b>3.924867</b> |
| 0.072632        | 4178        | 8.808         | 0.682         | -0.16196        | 3581        | 10.332        | 0.508         | -0.10316        |
| -0.81615        | 4132        | 8.4221        | 1.0679        | -0.25356        | 4794        | 13.058        | 2.218         | 0.451515        |
| -0.70975        | 4550        | 8             | 1.49          | -0.35374        | 4064        | 7.6772        | 3.1628        | -0.64335        |
| -1.76005        | 4104        | 9.2349        | 0.2551        | -0.06064        | 3999        | 10.828        | 0.012         | -0.00224        |
| -0.32606        | 5282        | 9.7122        | 0.2222        | 0.052643        | 5452        | 19.699        | 8.859         | 1.802806        |
| -0.73551        | 3877        | 9.8272        | 0.3372        | 0.079938        | 2996        | 14.119        | 3.279         | 0.667404        |
| 1.01466         | 5816        | 15.973        | 6.483         | 1.538617        | 5286        | 25.331        | 14.491        | 2.948788        |
| 0.403801        | 4423        | 8.9306        | 0.5594        | -0.13287        | 4082        | 20.186        | 9.346         | 1.901899        |
| 0.954845        | 5101        | 17.016        | 7.526         | 1.786169        | 4185        | 22.843        | 12.003        | 2.442537        |
| -0.96816        | 2960        | 10.405        | 0.915         | 0.217076        | 3568        | 12.584        | 1.744         | 0.355067        |
| 0.669736        | 4797        | 17.052        | 7.562         | 1.794713        | 3931        | 19.995        | 9.155         | 1.863035        |
| -0.3419         | 4805        | 15.983        | 6.493         | 1.540991        | 4183        | 14.535        | 3.695         | 0.752051        |
| 1.687418        | 3980        | 15.025        | 5.535         | 1.313613        | 2846        | 10.014        | 0.826         | -0.16787        |
| <b>3.23301</b>  | <b>4155</b> | <b>26.835</b> | <b>17.345</b> | <b>4.116666</b> | <b>3507</b> | <b>31.965</b> | <b>21.125</b> | <b>4.298654</b> |
| -0.88999        | 2261        | 9.1552        | 0.3348        | -0.07956        | 2526        | 7.5218        | 3.3182        | -0.67497        |
| 0.613881        | 2765        | 10.38         | 0.89          | 0.211143        | 2393        | 11.868        | 1.028         | 0.209378        |
| 2.388728        | 4205        | 10.654        | 1.164         | 0.276175        | 4043        | 13.653        | 2.813         | 0.572584        |
| <b>0.761021</b> | <b>5124</b> | <b>19.496</b> | <b>10.006</b> | <b>2.374786</b> | <b>4633</b> | <b>23.441</b> | <b>12.601</b> | <b>2.564216</b> |
| -0.60381        | 2856        | 8.6134        | 0.8766        | -0.20815        | 2760        | 6.8478        | 3.9922        | -0.81212        |
| -0.52183        | 3412        | 4.4549        | 5.0351        | -1.19515        | 3057        | 8.8649        | 1.9751        | -0.40168        |
| 0.260829        | 4126        | 12.312        | 2.822         | 0.669695        | 5361        | 7.6665        | 3.1735        | -0.64553        |
| 0.674946        | 5003        | 15.191        | 5.701         | 1.353013        | 5315        | 14.374        | 3.534         | 0.719291        |
| 1.520896        | 4780        | 16.234        | 6.744         | 1.600564        | 5224        | 17.037        | 6.197         | 1.26115         |
| <b>2.268682</b> | <b>3306</b> | <b>18.603</b> | <b>9.113</b>  | <b>2.162836</b> | <b>6341</b> | <b>22.315</b> | <b>11.475</b> | <b>2.335101</b> |
| -0.64312        | 4956        | 7.3043        | 2.1857        | -0.51886        | 4939        | 4.4543        | 6.3857        | -1.29914        |
| 0.696204        | 3339        | 9.5538        | 0.0638        | 0.015048        | 4514        | 11.453        | 0.613         | 0.124935        |
| 0.221231        | 3733        | 11.144        | 1.654         | 0.392475        | 4666        | 11.595        | 0.755         | 0.153829        |
| 1.165759        | 4478        | 11.009        | 1.519         | 0.360433        | 4330        | 9.7921        | 1.0479        | -0.21302        |
| -0.07805        | 3070        | 10.782        | 1.292         | 0.306556        | 5129        | 10.684        | 0.156         | -0.03154        |
| 0.293342        | 2776        | 9.2939        | 0.1961        | -0.04664        | 4043        | 3.0918        | 7.7482        | -1.57638        |
| 1.510892        | 3548        | 16.404        | 6.914         | 1.640913        | 4357        | 7.3445        | 3.4955        | -0.71105        |

|          |      |        |        |          |      |        |        |          |
|----------|------|--------|--------|----------|------|--------|--------|----------|
| 0.316684 | 3534 | 3.4522 | 6.0378 | -1.43314 | 4042 | 3.9584 | 6.8816 | -1.40004 |
| 1.465666 | 3224 | 20.192 | 10.702 | 2.539979 | 3883 | 6.4641 | 4.3759 | -0.89019 |
| 0.728925 | 2557 | 14.314 | 4.824  | 1.144861 | 3068 | 7.0078 | 3.8322 | -0.77956 |
| 0.746849 | 2563 | 11.627 | 2.137  | 0.507113 | 4127 | 11.437 | 0.597  | 0.121679 |
| -0.19705 | 2944 | 11.719 | 2.229  | 0.528949 | 4055 | 8.2367 | 2.6033 | -0.52951 |
| -0.06867 | 2543 | 10.145 | 0.655  | 0.155366 | 3567 | 9.672  | 1.168  | -0.23746 |
| 0.40651  | 3322 | 18.182 | 8.692  | 2.062914 | 3419 | 8.4235 | 2.4165 | -0.4915  |
| -0.17663 | 1763 | 3.7436 | 5.7464 | -1.36398 | 3672 | 6.4815 | 4.3585 | -0.88665 |
| 1.621142 | 4346 | 23.424 | 13.934 | 3.30708  | 4281 | 10.371 | 0.469  | -0.09523 |
| -0.23853 | 3867 | 8.7665 | 0.7235 | -0.17181 | 4753 | 7.0692 | 3.7708 | -0.76707 |
| -0.37789 | 4241 | 12.898 | 3.408  | 0.808779 | 3877 | 2.992  | 7.848  | -1.59668 |
| -0.61228 | 4450 | 5.1685 | 4.3215 | -1.02578 | 3662 | 4.26   | 6.58   | -1.33867 |
| -1.55687 | 5580 | 5.6989 | 3.7911 | -0.8999  | 4444 | 2.2502 | 8.5898 | -1.74762 |
| -0.5565  | 2497 | 3.4842 | 6.0058 | -1.42555 | 5208 | 5.2803 | 5.5597 | -1.13107 |
| -0.57161 | 2597 | 3.5811 | 5.9089 | -1.40255 | 3271 | 3.3017 | 7.5383 | -1.53367 |
| 1.179306 | 3351 | 6.3265 | 3.1635 | -0.75094 | 4194 | 3.958  | 6.882  | -1.40012 |
| 0.806455 | 3078 | 7.18   | 2.31   | -0.54836 | 4965 | 3.1621 | 7.6779 | -1.56207 |
| 0.188093 | 2924 | 2.736  | 6.754  | -1.60313 | 4385 | 3.6488 | 7.1912 | -1.46304 |
| 0.523221 | 2268 | 8.9947 | 0.4953 | -0.11765 | 6139 | 8.9754 | 1.8646 | -0.3792  |
| 3.095249 | 2911 | 14.943 | 5.453  | 1.294151 | 5275 | 13.668 | 2.828  | 0.575636 |
| 1.353748 | 2850 | 11.649 | 2.159  | 0.512334 | 5529 | 8.3198 | 2.5202 | -0.5126  |
| 2.170311 | 3982 | 11.301 | 1.811  | 0.429738 | 4491 | 5.923  | 4.917  | -1.00029 |
| 1.109488 | 2957 | 10.889 | 1.399  | 0.331952 | 4133 | 8.541  | 2.299  | -0.46759 |
| -0.13266 | 2455 | 5.2138 | 4.2762 | -1.01503 | 4264 | 6.2617 | 4.5783 | -0.93137 |
| 0.425059 | 3917 | 6.7399 | 2.7501 | -0.65282 | 3223 | 7.7567 | 3.0833 | -0.62718 |
| 0.784363 | 4303 | 12.619 | 3.129  | 0.74256  | 6053 | 16.075 | 5.235  | 1.065405 |
| -0.01261 | 3700 | 7.9459 | 1.5441 | -0.36658 | 6093 | 8.9283 | 1.9117 | -0.38878 |
| -0.62236 | 1722 | 4.3554 | 5.1346 | -1.21877 | 5005 | 7.7522 | 3.0878 | -0.62809 |
| -0.12328 | 3518 | 10.404 | 0.914  | 0.216839 | 4924 | 7.5345 | 3.3055 | -0.67239 |
| 0.700998 | 4356 | 12.879 | 3.389  | 0.80427  | 5109 | 8.945  | 1.895  | -0.38539 |
| 1.938764 | 3407 | 14.441 | 4.951  | 1.175004 | 6382 | 22.422 | 11.582 | 2.356873 |
| 1.942099 | 2852 | 16.129 | 6.639  | 1.575643 | 5979 | 15.036 | 4.196  | 0.853993 |
| -0.71046 | 1521 | 2.1696 | 7.3204 | -1.73756 | 3464 | 4.2148 | 6.6252 | -1.34787 |
| -0.57291 | 2973 | 3.4645 | 6.0255 | -1.43022 | 6319 | 15.05  | 4.21   | 0.856841 |
| -0.07117 | 3349 | 8.5399 | 0.9501 | -0.2256  | 5463 | 8.7498 | 2.0902 | -0.4251  |
| 0.268332 | 3658 | 11.427 | 1.937  | 0.459644 | 4045 | 9.5674 | 1.2726 | -0.25874 |
| 1.672412 | 4288 | 12.01  | 2.52   | 0.598016 | 5553 | 8.9141 | 1.9259 | -0.39167 |
| -0.60813 | 2496 | 9.4151 | 0.0749 | -0.01787 | 5923 | 8.3573 | 2.4827 | -0.50497 |
| -0.98233 | 2397 | 7.0088 | 2.4812 | -0.589   | 6023 | 7.737  | 3.103  | -0.63119 |
| 0.747266 | 2946 | 10.862 | 1.372  | 0.325543 | 7130 | 15.961 | 5.121  | 1.042209 |
| 0.024905 | 2969 | 13.506 | 4.016  | 0.953085 | 5384 | 16.048 | 5.208  | 1.059911 |
| 1.270174 | 3182 | 14.645 | 5.155  | 1.223422 | 4746 | 12.979 | 2.139  | 0.435441 |
| 0.917539 | 2344 | 12.585 | 3.095  | 0.73449  | 2594 | 7.2089 | 3.6311 | -0.73864 |
| -0.39205 | 2386 | 9.6815 | 0.1915 | 0.045357 | 3363 | 8.1178 | 2.7222 | -0.5537  |
| -0.20039 | 2561 | 9.4885 | 0.0015 | -0.00045 | 3578 | 12.521 | 1.681  | 0.342248 |
| 0.303971 | 3248 | 15.148 | 5.658  | 1.342807 | 6147 | 17.488 | 6.648  | 1.352918 |
| -0.35962 | 3322 | 9.693  | 0.203  | 0.048086 | 3627 | 7.2512 | 3.5888 | -0.73003 |

|                 |             |               |               |                 |             |               |               |                 |
|-----------------|-------------|---------------|---------------|-----------------|-------------|---------------|---------------|-----------------|
| -0.10431        | 3463        | 8.7785        | 0.7115        | -0.16897        | 4952        | 8.441         | 2.399         | -0.48794        |
| -0.45878        | 3798        | 16.403        | 6.913         | 1.640676        | 5552        | 9.0778        | 1.7622        | -0.35836        |
| -0.50369        | 3248        | 15.086        | 5.596         | 1.328091        | 5725        | 11.878        | 1.038         | 0.211413        |
| -0.39613        | 2469        | 20.656        | 11.166        | 2.650107        | 2795        | 12.129        | 1.289         | 0.262485        |
| -0.40882        | 4479        | 11.878        | 2.388         | 0.566687        | 4665        | 11.683        | 0.843         | 0.171735        |
| -0.38988        | 5512        | 10.867        | 1.377         | 0.32673         | 5787        | 11.059        | 0.219         | 0.044765        |
| -1.32861        | 4987        | 11.771        | 2.281         | 0.541291        | 6068        | 12.343        | 1.503         | 0.306029        |
| -0.50446        | 2973        | 10.225        | 0.735         | 0.174354        | 6100        | 12.295        | 1.455         | 0.296262        |
| -0.65327        | 2682        | 15.809        | 6.319         | 1.499692        | 3060        | 10.85         | 0.01          | 0.002238        |
| <b>2.336416</b> | <b>5003</b> | <b>24.265</b> | <b>14.775</b> | <b>3.506687</b> | <b>5398</b> | <b>22.193</b> | <b>11.353</b> | <b>2.310277</b> |
| 0.920249        | 3415        | 17.218        | 7.728         | 1.834112        | 5024        | 16.182        | 5.342         | 1.087177        |
| -0.72684        | 4372        | 11.985        | 2.495         | 0.592083        | 5184        | 12.191        | 1.351         | 0.275101        |
| -0.94659        | 3782        | 10.709        | 1.219         | 0.289229        | 5516        | 9.5178        | 1.3222        | -0.26883        |
| -1.03481        | 4307        | 13.281        | 3.791         | 0.899683        | 4641        | 7.4337        | 3.4063        | -0.6929         |
| -0.12536        | 4098        | 15.642        | 6.152         | 1.460056        | 5721        | 12.882        | 2.042         | 0.415703        |
| 1.670119        | 2740        | 18.577        | 9.087         | 2.156665        | 4203        | 11.754        | 0.914         | 0.186181        |
| -0.45768        | 3257        | 7.6451        | 1.8449        | -0.43797        | 3861        | 9.9197        | 0.9203        | -0.18706        |
| -0.31793        | 3152        | 17.449        | 7.959         | 1.888939        | 3599        | 14.448        | 3.608         | 0.734348        |
| 0.720589        | 3671        | 9.5614        | 0.0714        | 0.016852        | 4987        | 12.873        | 2.033         | 0.413872        |
| -0.98796        | 3571        | 9.7452        | 0.2552        | 0.060476        | 5071        | 14.06         | 3.22          | 0.655399        |
| -1.21028        | 2179        | 8.7655        | 0.7245        | -0.17205        | 3387        | 4.2811        | 6.5589        | -1.33438        |
| 0.262705        | 4880        | 12.234        | 2.744         | 0.651182        | 5696        | 8.8308        | 2.0092        | -0.40862        |
| -0.03845        | 4815        | 6.7913        | 2.6987        | -0.64062        | 5011        | 6.805         | 4.035         | -0.82083        |
| 0.609088        | 4377        | 11.675        | 2.185         | 0.518505        | 5216        | 10.755        | 0.085         | -0.01709        |
| -0.09889        | 4724        | 7.409         | 2.081         | -0.49401        | 4224        | 10.133        | 0.707         | -0.14365        |
| -1.70007        | 3398        | 4.8852        | 4.6048        | -1.09302        | 4881        | 6.1668        | 4.6732        | -0.95068        |
| -0.6876         | 5661        | 7.5782        | 1.9118        | -0.45385        | 4944        | 6.4118        | 4.4282        | -0.90083        |
| 0.086596        | 4538        | 7.4041        | 2.0859        | -0.49517        | 4449        | 5.4169        | 5.4231        | -1.10327        |
| -1.21672        | 4626        | 4.2802        | 5.2098        | -1.23662        | 6019        | 6.9281        | 3.9119        | -0.79578        |
| -0.90776        | 3482        | 7.668         | 1.822         | -0.43254        | 4885        | 8.3316        | 2.5084        | -0.5102         |
| -0.48546        | 3499        | 2.4007        | 7.0893        | -1.68271        | 4885        | 4.0532        | 6.7868        | -1.38075        |
| -0.31543        | 3094        | 11.054        | 1.564         | 0.371114        | 4917        | 12.345        | 1.505         | 0.306436        |
| 0.51426         | 3577        | 13.447        | 3.957         | 0.939082        | 4638        | 16.192        | 5.352         | 1.089212        |
| 0.199139        | 4092        | 11.779        | 2.289         | 0.543189        | 6175        | 12.713        | 1.873         | 0.381316        |
| -0.52726        | 3487        | 11.356        | 1.866         | 0.442792        | 4850        | 15.835        | 4.995         | 1.016571        |
| -1.37936        | 2470        | 1.9028        | 7.5872        | -1.80088        | 3648        | 5.8662        | 4.9738        | -1.01185        |
| -0.13036        | 3193        | 9.5208        | 0.0308        | 0.007215        | 3739        | 18.534        | 7.694         | 1.565755        |
| 0.890862        | 3579        | 9.2763        | 0.2137        | -0.05082        | 5006        | 13.044        | 2.204         | 0.448667        |
| -1.25723        | 2772        | 11.688        | 2.198         | 0.521591        | 5390        | 19.647        | 8.807         | 1.792225        |
| -1.636          | 3127        | 4.1573        | 5.3327        | -1.26579        | 6238        | 12.744        | 1.904         | 0.387624        |
| <b>0.416305</b> | <b>1941</b> | <b>18.187</b> | <b>8.697</b>  | <b>2.0641</b>   | <b>3057</b> | <b>23.585</b> | <b>12.745</b> | <b>2.593517</b> |
| -1.09463        | 2673        | 6.4347        | 3.0553        | -0.72526        | 4414        | 7.5442        | 3.2958        | -0.67042        |
| 0.237278        | 3467        | 12.374        | 2.884         | 0.68441         | 4586        | 22.372        | 11.532        | 2.346699        |
| -1.21051        | 3390        | 5.7817        | 3.7083        | -0.88024        | 3453        | 6.8636        | 3.9764        | -0.8089         |
| -1.07641        | 3262        | 6.5604        | 2.9296        | -0.69542        | 4610        | 8.7636        | 2.0764        | -0.4223         |
| -1.089          | 1709        | 7.6068        | 1.8832        | -0.44706        | 2973        | 9.519         | 1.321         | -0.26859        |
| 0.337525        | 4388        | 9.7311        | 0.2411        | 0.057129        | 3760        | 4.6011        | 6.2389        | -1.26927        |

|          |         |          |          |          |          |        |          |          |
|----------|---------|----------|----------|----------|----------|--------|----------|----------|
| 0.165584 | 2305    | 8.026    | 1.464    | -0.34757 | 3039     | 9.5426 | 1.2974   | -0.26379 |
| -0.24812 | 3358    | 4.6456   | 4.8444   | -1.14989 | 3850     | 4.8571 | 5.9829   | -1.21718 |
| 1.089063 | 4155    | 9.4344   | 0.0556   | -0.01329 | 5781     | 7.9398 | 2.9002   | -0.58992 |
| -0.20852 | 3100    | 6.871    | 2.619    | -0.6217  | 5274     | 4.7023 | 6.1377   | -1.24868 |
| -1.18954 | 3218    | 5.3449   | 4.1451   | -0.98392 | 4165     | 6.1945 | 4.6455   | -0.94505 |
| -0.56626 | 2218    | 5.0947   | 4.3953   | -1.0433  | 3607     | 8.234  | 2.606    | -0.53006 |
| 0.494252 | 3062    | 6.3684   | 3.1216   | -0.74099 | 5783     | 7.9543 | 2.8857   | -0.58697 |
| -0.48071 | 2301    | 3.9983   | 5.4917   | -1.30353 | 3568     | 8.0157 | 2.8243   | -0.57448 |
| 1.018203 | 1722    | 4.82     | 4.67     | -1.1085  | 3092     | 5.4981 | 5.3419   | -1.08675 |
| -0.00469 | 1954    | 8.393    | 1.097    | -0.26046 | 4138     | 5.3407 | 5.4993   | -1.11878 |
| -0.8581  | 3158    | 3.7049   | 5.7851   | -1.37316 | 5560     | 6.9065 | 3.9335   | -0.80017 |
| 2.308072 | 2332    | 11.407   | 1.917    | 0.454897 | 5488     | 19.843 | 9.003    | 1.832106 |
| 0.862101 | 2751    | 6.9429   | 2.5471   | -0.60464 | 6770     | 18.656 | 7.816    | 1.590579 |
| -0.88284 | 2240    | 6.7411   | 2.7489   | -0.65253 | 4521     | 18.668 | 7.828    | 1.593021 |
| 0.02824  | 3402    | 10.729   | 1.239    | 0.293976 | 5685     | 19.402 | 8.562    | 1.742373 |
| 1.020912 | 3627    | 10.422   | 0.932    | 0.221111 | 6268     | 26.308 | 15.468   | 3.147585 |
| 0.209768 | 2496    | 11.058   | 1.568    | 0.372063 | 4166     | 15.963 | 5.123    | 1.042616 |
| -0.77742 | 3966    | 7.9677   | 1.5223   | -0.36141 | 5605     | 11.204 | 0.364    | 0.074269 |
| -0.58866 | 2344    | 4.9488   | 4.5412   | -1.07793 | 3916     | 13.994 | 3.154    | 0.64197  |
| 5.886319 | 2719    | 6.9511   | 2.5389   | -0.60269 | 3723     | 2.0145 | 8.8255   | -1.79558 |
| -0.59754 | 3060    | 9.3137   | 0.1763   | -0.04194 | 4682     | 3.994  | 6.846    | -1.3928  |
| 0.625969 | 2018    | 5.1041   | 4.3859   | -1.04107 | 5269     | 7.6865 | 3.1535   | -0.64146 |
| 0.708084 | 2078    | 12.753   | 3.263    | 0.774364 | 4157     | 6.8078 | 4.0322   | -0.82026 |
| -0.02824 | 1721    | 6.8565   | 2.6335   | -0.62514 | 5172     | 6.3805 | 4.4595   | -0.9072  |
| -0.43048 | 898     | 4.343    | 5.147    | -1.22171 | 4387     | 1.6868 | 9.1532   | -1.86226 |
| -1.17412 | 2303    | 9.0317   | 0.4583   | -0.10887 | 4375     | 1.5314 | 9.3086   | -1.89388 |
| -0.17996 | 1559    | 6.2861   | 3.2039   | -0.76053 | 4056     | 4.8077 | 6.0323   | -1.22723 |
| -0.38915 | 1471    | 8.3617   | 1.1283   | -0.26789 | 3933     | 4.8818 | 5.9582   | -1.21215 |
| 0.371288 | 1578    | 10.963   | 1.473    | 0.349515 | 3906     | 8.8326 | 2.0074   | -0.40826 |
| 1.964399 | 1892    | 15.751   | 6.261    | 1.485926 | 4497     | 13.898 | 3.058    | 0.622436 |
| -0.8596  | 2548    | 7.5746   | 1.9154   | -0.45471 | 5022     | 10.155 | 0.685    | -0.13918 |
| -1.06153 | 2062    | 5.4801   | 4.0099   | -0.95183 | 4019     | 4.9764 | 5.8636   | -1.1929  |
| -1.19333 | 1928    | 4.3568   | 5.1332   | -1.21844 | 2828     | 7.7086 | 3.1314   | -0.63696 |
| -0.53548 | 1241    | 7.6551   | 1.8349   | -0.4356  | 2864     | 13.547 | 2.707    | 0.551016 |
| 1.343953 | 1397    | 6.9435   | 2.5465   | -0.6045  | 2968     | 19.778 | 8.938    | 1.81888  |
| -0.65558 | 2107    | 6.1224   | 3.3676   | -0.79938 | 2371     | 11.135 | 0.295    | 0.060229 |
| -0.60219 | 3420    | 9.269    | 0.221    | -0.05255 | 4132     | 12.343 | 1.503    | 0.306029 |
| -0.06742 | 2809    | 11.036   | 1.546    | 0.366841 | 3993     | 13.849 | 3.009    | 0.612466 |
| -1.02481 | 2807    | 8.0513   | 1.4387   | -0.34156 | 2295     | 9.6732 | 1.1668   | -0.23721 |
|          | 3774    | 9.4904   | 2.8468   |          | 4076     | 10.839 | 3.32065  |          |
|          |         |          | 8.5404   |          |          |        | 9.96195  |          |
|          |         |          | 4.213264 |          |          |        | 4.914562 |          |
|          | 5049    | 50.485   |          | 5585     | 43.474   |        |          |          |
|          | 6435    | 50.334   |          | 5339     | 54.392   |        |          |          |
|          | 4737    | 45.303   |          | 4551     | 53.922   |        |          |          |
|          | 6468    | 53.973   |          | 5863     | 53.045   |        |          |          |
|          | 5672.25 | 50.02375 |          | 5334.5   | 51.20825 |        |          |          |

|          |          |          |          |
|----------|----------|----------|----------|
| 908.8709 | 3.567962 | 564.4924 | 5.186295 |
| 2611     | 4.8257   | 2247     | 3.0263   |
| 3054     | 9.9214   | 2328     | 13.703   |
| 1358     | 8.542    | 2160     | 3.9352   |
| 2405     | 7.6507   | 2354     | 3.356    |
| 2357     | 7.73495  | 2272.25  | 6.005125 |
| 718.9414 | 2.152729 | 87.61421 | 5.14565  |
|          | 6.458187 |          | 15.43695 |
|          | 10.70389 |          | 15.55889 |
|          | 17.16207 |          | 30.99583 |
| 3315.25  | 42.2888  | 3062.25  | 45.20313 |
|          | 0.40583  |          | 0.685701 |
|          | 0.59417  |          | 0.314299 |

|      |        |      |        |
|------|--------|------|--------|
| 699  | 12.876 | 899  | 4.3382 |
| 548  | 6.7518 | 929  | 19.268 |
| 4354 | 11.897 | 4466 | 16.749 |
| 3657 | 12.196 | 4052 | 6.0711 |
| 5301 | 11.47  | 7640 | 14.411 |
| 4453 | 11.812 | 7730 | 18.642 |





y

y

y

y

y

x

debris c

y

y

y

y

y

y



y

y

|           |                        |                  | cell ct | % inf  | AD     |
|-----------|------------------------|------------------|---------|--------|--------|
| 50076 A02 | M-015469- spermatog    | 221178 SPATA13   | 1820    | 6.9231 | 2.3931 |
| 50076 A04 | M-015468- EF-hand do   | 221154 EFHA1     | 1410    | 9.1489 | 4.6189 |
| 50076 A05 | M-016502- hypothetic   | 201283 FLJ32065  | 894     | 5.7047 | 1.1747 |
| 50076 A06 | M-017843- N-6 adenin   | 221143 N6AMT2    | 1308    | 9.1743 | 4.6443 |
| 50076 A07 | M-018490- tripartite r | 201292 TRIM65    | 1274    | 12.323 | 7.793  |
| 50076 A08 | M-031762- similar to h | 221091 LOC221091 | 1380    | 12.029 | 7.499  |
| 50076 A09 | M-022951- unc-13 hon   | 201294 UNC13D    | 1529    | 10.988 | 6.458  |
| 50076 A10 | M-017861- ADP-ribosy   | 221079 ARL5B     | 1552    | 10.309 | 5.779  |
| 50076 A11 | M-017410- RAD52 moi    | 201299 RDM1      | 1847    | 7.7423 | 3.2123 |
| 50076 A12 | M-018822- NOL1/NOP     | 221078 NSUN6     | 1236    | 8.4951 | 3.9651 |
| 50076 A13 | M-018953- spinster ho  | 201305 SPNS3     | 1662    | 7.5812 | 3.0512 |
| 50076 A14 | M-007567- solute carri | 221074 SLC39A12  | 1227    | 12.714 | 8.184  |
| 50076 A15 | M-016503- F-box prote  | 201456 FBXO15    | 1521    | 7.1006 | 2.5706 |
| 50076 A16 | M-026397- chromoson    | 221061 C10orf38  | 2503    | 5.0739 | 0.5439 |
| 50076 A17 | M-018489- zinc finger  | 201514 ZNF584    | 645     | 12.093 | 7.563  |
| 50076 A18 | M-016615- chromoson    | 221060 C10orf111 | 892     | 13.677 | 9.147  |
| 50076 A19 | M-016504- zinc finger  | 201516 ZSCAN4    | 609     | 13.465 | 8.935  |
| 50076 A20 | M-016194- chromoson    | 221044 C10orf49  | 1099    | 6.0965 | 1.5665 |
| 50076 A21 | M-017859- STT3, subu   | 201595 STT3B     | 935     | 7.5936 | 3.0636 |
| 50076 A23 | M-017812- dynein hea   | 201625 DNHD2     | 726     | 9.7796 | 5.2496 |
| 50076 B02 | M-027182- similar to o | 388726 LOC388726 | 899     | 4.2269 | 0.3031 |
| 50076 B04 | M-032074- hypothetic   | 388685 FLJ39739  | 1734    | 9.3426 | 4.8126 |
| 50076 B05 | M-017625- copine II    | 221184 CPNE2     | 925     | 2.8108 | 1.7192 |
| 50076 B06 | M-026285- placenta-sp  | 219348 PLAC9     | 1982    | 1.4632 | 3.0668 |
| 50076 B07 | M-030630- plasma kall  | 221191 Klkbl4    | 2176    | 3.3088 | 1.2212 |
| 50076 B08 | M-016614- centrosom.   | 220766 CEP170L   | 2988    | 4.6854 | 0.1554 |
| 50076 B09 | M-008602- carboxylest  | 221223 CES7      | 1994    | 7.4223 | 2.8923 |
| 50076 B10 | M-018398- hypothetic   | 253815 FLJ36335  | 1429    | 3.9888 | 0.5412 |
| 50076 B11 | M-015470- chromoson    | 221241 C18orf20  | 2463    | 5.1563 | 0.6263 |
| 50076 B12 | M-018973- hypothetic   | 220081 FLJ32682  | 2007    | 8.6697 | 4.1397 |
| 50076 B13 | M-028586- chromoson    | 221261 C6orf184  | 2817    | 5.9638 | 1.4338 |
| 50076 B14 | M-016759- bromodom     | 254065 BRWD3     | 1710    | 5.614  | 1.084  |
| 50076 B15 | M-028587- chromoson    | 221262 C6orf185  | 2935    | 11.823 | 7.293  |
| 50076 B16 | M-017081- leucine rich | 254050 LRRC43    | 3563    | 12.349 | 7.819  |
| 50076 B17 | M-031760- 5'-nucleoti  | 221294 NT5DC1    | 2009    | 5.7242 | 1.1942 |
| 50076 B18 | M-025464- hypothetic   | 254048 FLJ25778  | 1150    | 14.174 | 9.644  |
| 50076 B19 | M-016124- family with  | 221301 FAM26D    | 2847    | 18.932 | 14.402 |
| 50076 B20 | M-032013- methionine   | 254042 MAP1D     | 2872    | 17.827 | 13.297 |
| 50076 B21 | M-015894- chromoson    | 221302 C6orf113  | 2671    | 8.2366 | 3.7066 |
| 50076 B23 | M-016125- chromoson    | 221322 C6orf170  | 1238    | 9.9354 | 5.4054 |
| 50076 C02 | M-018746- coiled-coil  | 221016 CCDC7     | 4995    | 3.4434 | 1.0866 |
| 50076 C04 | M-016264- RasGEF dor   | 221002 RASGEF1A  | 3512    | 12.528 | 7.998  |
| 50076 C05 | M-017946- 2'-phospho   | 201626 2'-PDE    | 3821    | 2.4077 | 2.1223 |
| 50076 C06 | M-016310- zinc finger  | 220992 ZNF485    | 4909    | 6.8649 | 2.3349 |
| 50076 C07 | M-016505- family with  | 201627 FAM116A   | 2472    | 5.2184 | 0.6884 |
| 50076 C08 | M-019347- heterogen    | 220988 HNRPA3    | 2396    | 29.716 | 25.186 |

|           |                        |                  |      |         |         |
|-----------|------------------------|------------------|------|---------|---------|
| 50076 C09 | M-018488- V-set and i  | 201633 VSIG9     | 4335 | 6.3899  | 1.8599  |
| 50076 C10 | M-016622- chromoson    | 220979 C10orf25  | 3592 | 5.6514  | 1.1214  |
| 50076 C11 | M-028275- hypothetic   | 201725 LOC201725 | 2274 | 3.9578  | 0.5722  |
| 50076 C12 | M-026426- family with  | 220965 FAM13C1   | 1686 | 4.4484  | 0.0816  |
| 50076 C13 | M-007379- solute carri | 201780 SLC10A4   | 1735 | 8.5303  | 4.0003  |
| 50076 C14 | M-019303- solute carri | 220963 SLC16A9   | 4251 | 8.5392  | 4.0092  |
| 50076 C15 | M-017441- tigger trans | 201798 TIGD4     | 2316 | 3.2383  | 1.2917  |
| 50076 C16 | M-019384- zinc finger  | 220929 ZNF438    | 4884 | 10.217  | 5.687   |
| 50076 C17 | M-016801- transmemk    | 201799 TMEM154   | 2867 | 8.8594  | 4.3294  |
| 50076 C18 | M-029775- hypothetic   | 220906 LOC220906 | 1394 | 6.241   | 1.711   |
| 50076 C19 | M-016613- hypothetic   | 201824 MGC42157  | 2545 | 7.5049  | 2.9749  |
| 50076 C20 | M-025998- COBW dom     | 220869 CBWD5     | 2269 | 5.2446  | 0.7146  |
| 50076 C21 | M-017827- chromoson    | 201895 C4orf34   | 2288 | 10.49   | 5.96    |
| 50076 C23 | M-016802- hypothetic   | 201931 FLJ38482  | 1797 | 8.9594  | 4.4294  |
| 50076 D02 | M-030268- hypothetic   | 254028 LOC254028 | 3049 | 2.099   | 2.431   |
| 50076 D04 | M-018388- hypothetic   | 254013 MGC50559  | 2055 | 3.2117  | 1.3183  |
| 50076 D05 | M-016126- chromoson    | 221336 C6orf65   | 2830 | 0.91873 | 3.61127 |
| 50076 D06 | M-003992- aspartate b  | 253982 ASPHD1    | 1768 | 0.90498 | 3.62502 |
| 50076 D07 | M-009064- glutathione  | 221357 GSTA5     | 1481 | 2.0257  | 2.5043  |
| 50076 D08 | M-017862- potassium    | 253980 KCTD13    | 2936 | 2.6567  | 1.8733  |
| 50076 D09 | M-025108- tudor domi   | 221400 TDRD6     | 2437 | 4.2265  | 0.3035  |
| 50076 D10 | M-021940- hypothetic   | 253970 LOC253970 | 3517 | 6.7671  | 2.2371  |
| 50076 D11 | M-016547- spermatogi   | 221409 SPATS1    | 2063 | 5.0412  | 0.5112  |
| 50076 D12 | M-023212- hypothetic   | 253962 LOC253962 | 2142 | 2.7544  | 1.7756  |
| 50076 D13 | M-016757- hypothetic   | 221416 MGC45491  | 1145 | 3.4934  | 1.0366  |
| 50076 D14 | M-021937- GTPase act   | 253959 GARNL1    | 1238 | 4.2003  | 0.3297  |
| 50076 D15 | M-018694- chromoson    | 221421 C6orf206  | 3892 | 5.2158  | 0.6858  |
| 50076 D16 | M-017080- YTH domai    | 253943 YTHDF3    | 1716 | 2.0396  | 2.4904  |
| 50076 D17 | M-028716- chromoson    | 221424 C6orf154  | 1722 | 1.1614  | 3.3686  |
| 50076 D18 | M-007808- angiopoieti  | 253935 ANGPTL5   | 2115 | 4.1608  | 0.3692  |
| 50076 D19 | M-025095- hypothetic   | 221442 LOC221442 | 1902 | 5.9411  | 1.4111  |
| 50076 D20 | M-017079- hypothetic   | 253868 FLJ30313  | 1316 | 3.2675  | 1.2625  |
| 50076 D21 | M-015886- chromoson    | 221443 C6orf130  | 2556 | 3.4038  | 1.1262  |
| 50076 D23 | M-016448- kinesin farr | 221458 KIF6      | 2517 | 3.536   | 0.994   |
| 50076 E02 | M-007160- ring finger  | 220441 RNF152    | 4639 | 0.79759 | 3.73241 |
| 50076 E04 | M-015467- coiled-coil  | 220388 CCDC89    | 4004 | 0.37463 | 4.15537 |
| 50076 E05 | M-016803- RWD doma     | 201965 RWDD4A    | 2528 | 4.4304  | 0.0996  |
| 50076 E06 | M-018051- hypothetic   | 220382 MGC33846  | 4598 | 2.3488  | 2.1812  |
| 50076 E07 | M-016804- coiled-coil  | 201973 CCDC111   | 3095 | 1.1309  | 3.3991  |
| 50076 E08 | M-017439- tigger trans | 220359 TIGD3     | 1711 | 2.0456  | 2.4844  |
| 50076 E09 | M-015826- transmemk    | 202018 TAPT1     | 2216 | 2.5722  | 1.9578  |
| 50076 E10 | M-017894- OAF homol    | 220323 OAF       | 3375 | 2.4889  | 2.0411  |
| 50076 E11 | M-016805- hypothetic   | 202020 FLJ39653  | 2277 | 3.3816  | 1.1484  |
| 50076 E12 | M-015466- hepatocyte   | 220296 HEPACAM   | 2242 | 1.1151  | 3.4149  |
| 50076 E13 | M-028343- hypothetic   | 202025 DKFZp667E | 1378 | 4.8621  | 0.3321  |
| 50076 E14 | M-026487- OTU domai    | 220213 OTUD1     | 1276 | 2.8213  | 1.7087  |
| 50076 E15 | M-024410- hypothetic   | 202051 LOC202051 | 3142 | 3.7237  | 0.8063  |

|           |                        |                  |      |         |         |
|-----------|------------------------|------------------|------|---------|---------|
| 50076 E16 | M-009030- atonal hom   | 220202 ATOH7     | 3091 | 2.3617  | 2.1683  |
| 50076 E17 | M-016895- Dnal (Hsp4   | 202052 DNAJC18   | 3615 | 4.343   | 0.187   |
| 50076 E18 | M-015595- docking pro  | 220164 DOK6      | 3366 | 2.0202  | 2.5098  |
| 50076 E19 | M-018290- RAN bindin   | 202151 RANBP3L   | 3575 | 8.1678  | 3.6378  |
| 50076 E20 | M-016630- coiled-coil  | 220136 CCDC11    | 2498 | 4.3235  | 0.2065  |
| 50076 E21 | M-024602- hypothetic   | 202181 LOC202181 | 3756 | 5.0053  | 0.4753  |
| 50076 E23 | M-018477- coiled-coil  | 202243 CCDC125   | 2331 | 8.2797  | 3.7497  |
| 50076 F02 | M-021432- methionine   | 253827 MSRB3     | 1989 | 2.916   | 1.614   |
| 50076 F04 | M-032207- LAG1 homc    | 253782 LASS6     | 5652 | 6.1571  | 1.6271  |
| 50076 F05 | M-018752- chromosom    | 221468 C6orf128  | 1713 | 6.7717  | 2.2417  |
| 50076 F06 | M-019181- WD repeat    | 253769 WDR27     | 2076 | 3.7572  | 0.7728  |
| 50076 F07 | M-008431- FYVE, RhoC   | 221472 FGD2      | 1622 | 1.6646  | 2.8654  |
| 50076 F08 | M-026500- early B-cell | 253738 EBF3      | 1831 | 2.8946  | 1.6354  |
| 50076 F09 | M-015830- peptidase i  | 221476 PI16      | 3135 | 5.1356  | 0.6056  |
| 50076 F10 | M-029678- family with  | 253725 FAM21C    | 3731 | 7.5851  | 3.0551  |
| 50076 F11 | M-016129- chromosom    | 221477 C6orf89   | 3362 | 9.3992  | 4.8692  |
| 50076 F12 | M-027225- chromosom    | 253714 C6orf167  | 1311 | 3.5088  | 1.0212  |
| 50076 F13 | M-018747- chromosom    | 221481 C6orf81   | 1659 | 2.9536  | 1.5764  |
| 50076 F14 | M-016661- ankyrin rep  | 253650 ANKRD18A  | 2782 | 4.2775  | 0.2525  |
| 50076 F15 | M-017897- chromosom    | 221491 C6orf1    | 2815 | 0.42629 | 4.10371 |
| 50076 F16 | M-023468- zinc finger  | 253639 ZNF620    | 2855 | 2.1716  | 2.3584  |
| 50076 F17 | M-017941- LEM domai    | 221496 LEMD2     | 5028 | 7.8162  | 3.2862  |
| 50076 F18 | M-017855- coiled-coil  | 253635 CCDC75    | 4776 | 7.2236  | 2.6936  |
| 50076 F19 | M-016248- zinc finger  | 221504 ZBTB9     | 4055 | 10.234  | 5.704   |
| 50076 F20 | M-028601- chromosom    | 253582 C6orf191  | 4063 | 8.1467  | 3.6167  |
| 50076 F21 | M-018786- zinc finger  | 221527 ZBTB12    | 3022 | 11.35   | 6.82    |
| 50076 F23 | M-016445- chromosom    | 221545 C6orf136  | 3783 | 3.5422  | 0.9878  |
| 50076 G02 | M-015917- chromosom    | 220134 C18orf24  | 4921 | 1.1177  | 3.4123  |
| 50076 G04 | M-018744- family with  | 220108 FAM124A   | 3599 | 4.3345  | 0.1955  |
| 50076 G05 | M-018446- chromosom    | 202299 C5orf27   | 2565 | 1.4425  | 3.0875  |
| 50076 G06 | M-032243- deleted in l | 220107 DLEU7     | 2719 | 2.0964  | 2.4336  |
| 50076 G07 | M-016896- chromosom    | 202309 C5orf29   | 3114 | 1.0918  | 3.4382  |
| 50076 G08 | M-015594- spermatid    | 220082 SPERT     | 2666 | 0.56264 | 3.96736 |
| 50076 G09 | M-016373- cardiomyo    | 202333 CMYA5     | 2949 | 1.3564  | 3.1736  |
| 50076 G10 | M-016302- leucine rich | 220074 LRRC51    | 1878 | 2.2897  | 2.2403  |
| 50076 G11 | M-016284- similar to R | 202459 LOC202459 | 2007 | 0.79721 | 3.73279 |
| 50076 G12 | M-016294- chromosom    | 220070 C11orf76  | 1058 | 0.56711 | 3.96289 |
| 50076 G13 | M-018956- hypothetic   | 202500 RP11-444E | 1771 | 2.3715  | 2.1585  |
| 50076 G14 | M-010374- oral cancer  | 220064 ORAOV1    | 2210 | 0.36199 | 4.16801 |
| 50076 G15 | M-016897- KH domain    | 202559 KHDRBS2   | 3282 | 0.76173 | 3.76827 |
| 50076 G16 | M-018459- coiled-coil  | 220047 CCDC83    | 2944 | 3.3288  | 1.2012  |
| 50076 G17 | M-016273- chromosom    | 202865 C7orf33   | 1670 | 4.5509  | 0.0209  |
| 50076 G18 | M-007159- hypothetic   | 220042 FLJ25416  | 2856 | 2.8361  | 1.6939  |
| 50076 G19 | M-016898- hypothetic   | 202915 MGC9712   | 2198 | 5.0045  | 0.4745  |
| 50076 G20 | M-019405- glyceroph    | 220032 GDPD4     | 3535 | 5.3465  | 0.8165  |
| 50076 G21 | M-016813- t-SNARE dc   | 203062 TSNARE1   | 3424 | 17.231  | 12.701  |
| 50076 G23 | M-025792- R3H domai    | 203069 R3HCC1    | 2524 | 5.2694  | 0.7394  |



|           |                         |                  |      |         |         |
|-----------|-------------------------|------------------|------|---------|---------|
| 50076 H02 | M-016035- cell adhesi   | 253559 CADM2     | 1455 | 1.4433  | 3.0867  |
| 50076 H04 | M-010307- lysocardioli  | 253558 LYCAT     | 1989 | 1.458   | 3.072   |
| 50076 H05 | M-005291- histone clu   | 221613 HIST1H2AA | 2191 | 1.5974  | 2.9326  |
| 50076 H06 | M-007350- solute carri  | 253512 SLC25A30  | 1304 | 0.6135  | 3.9165  |
| 50076 H07 | M-008121- amine oxid    | 221656 AOF1      | 2231 | 0.62752 | 3.90248 |
| 50076 H08 | M-023605- zinc finger   | 253461 ZBTB38    | 2999 | 0.96699 | 3.56301 |
| 50076 H09 | M-009788- RNA bindin    | 221662 RBM24     | 1572 | 0.57252 | 3.95748 |
| 50076 H10 | M-016984- rapamycin-    | 253260 RICTOR    | 3258 | 1.5347  | 2.9953  |
| 50076 H11 | M-007162- ring finger   | 221687 RNF182    | 1471 | 0.47587 | 4.05413 |
| 50076 H12 | M-018374- hypothetic    | 253150 MGC14276  | 1845 | 0.59621 | 3.93379 |
| 50076 H13 | M-025063- phosphata:    | 221692 PHACTR1   | 1695 | 0.35398 | 4.17602 |
| 50076 H14 | M-018415- chromoson     | 253143 C22orf30  | 3017 | 1.1601  | 3.3699  |
| 50076 H15 | M-028677- hypothetic    | 221710 LOC221710 | 1993 | 0.45158 | 4.07842 |
| 50076 H16 | M-018963- HLA compl     | 253018 HCG27     | 1749 | 0.11435 | 4.41565 |
| 50076 H17 | M-019304- 145 kDa nu    | 221711 NO145     | 1539 | 0.32489 | 4.20511 |
| 50076 H18 | M-024084- steroid 5 al  | 253017 SRD5A2L2  | 2841 | 0.24639 | 4.28361 |
| 50076 H19 | M-016250- chromoson     | 221718 C6orf218  | 1907 | 1.4158  | 3.1142  |
| 50076 H20 | M-021499- hypothetic    | 253012 LOC253012 | 2827 | 1.1319  | 3.3981  |
| 50076 H21 | M-019365- chromoson     | 221749 C6orf145  | 3191 | 1.7236  | 2.8064  |
| 50076 H23 | M-028629- hypothetic    | 221756 MGC39372  | 1603 | 0.93575 | 3.59425 |
| 50076 I02 | M-016619- chromoson     | 220004 C11orf66  | 4394 | 2.64    | 1.89    |
| 50076 I04 | M-016374- cytochrom     | 220002 CYBASC3   | 2099 | 0.71463 | 3.81537 |
| 50076 I05 | M-027221- tryptophan    | 203074 UNQ9391   | 3397 | 1.3541  | 3.1759  |
| 50076 I06 | M-015593- von Willebr   | 220001 VWCE      | 5201 | 1.9035  | 2.6265  |
| 50076 I07 | M-005880- HtrA serine   | 203100 HTRA4     | 2062 | 0.33948 | 4.19052 |
| 50076 I08 | M-015592- hypothetic    | 219995 MGC35295  | 2683 | 1.0809  | 3.4491  |
| 50076 I09 | M-018487- chromoson     | 203111 C8orf47   | 2461 | 1.4628  | 3.0672  |
| 50076 I10 | M-018461- placenta-sp   | 219990 PLAC1L    | 2169 | 1.1065  | 3.4235  |
| 50076 I11 | M-016999- leucine-rich  | 203190 LGI3      | 1865 | 2.4129  | 2.1171  |
| 50076 I12 | M-015591- FLJ36874 p    | 219988 FLJ36874  | 1304 | 1.227   | 3.303   |
| 50076 I13 | M-026196- chromoson     | 203197 C9orf91   | 1445 | 1.8685  | 2.6615  |
| 50076 I14 | M-026664- macrophag     | 219972 MPEG1     | 1911 | 1.5175  | 3.0125  |
| 50076 I15 | M-013341- chromoson     | 203228 C9orf72   | 2091 | 2.0564  | 2.4736  |
| 50076 I16 | M-010306- glycine-N-a   | 219970 GLYATL2   | 1670 | 1.7964  | 2.7336  |
| 50076 I17 | M-018478- chromoson     | 203238 C9orf93   | 1627 | 2.5814  | 1.9486  |
| 50076 I18 | M-017842- spermatog     | 219938 SPATA19   | 1743 | 6.0815  | 1.5515  |
| 50076 I19 | M-021314- chromoson     | 203245 C9orf90   | 1479 | 3.5159  | 1.0141  |
| 50076 I20 | M-019072- mitochond     | 219927 MRPL21    | 2291 | 3.2737  | 1.2563  |
| 50076 I21 | M-017484- chromoson     | 203259 C9orf25   | 1429 | 6.508   | 1.978   |
| 50076 I23 | M-017801- coiled-coil   | 203260 CCDC107   | 1663 | 4.0289  | 0.5011  |
| 50076 J02 | M-016166- fibronectin   | 252995 FNDC5     | 2115 | 1.5603  | 2.9697  |
| 50076 J04 | M-017952- syntaxin bi   | 252983 STXBP4    | 1930 | 4.5078  | 0.0222  |
| 50076 J05 | M-017385- zinc finger   | 221785 ZNF498    | 2300 | 3.5217  | 1.0083  |
| 50076 J06 | M-016345- nei like 2 (E | 252969 NEIL2     | 1924 | 0.88358 | 3.64642 |
| 50076 J07 | M-017383- chromoson     | 221786 C7orf38   | 2447 | 5.0674  | 0.5374  |
| 50076 J08 | M-021304- zinc finger   | 252884 ZNF396    | 2053 | 2.8251  | 1.7049  |
| 50076 J09 | M-028811- hypothetic    | 221806 FLJ14712  | 1443 | 0.693   | 3.837   |

|           |                        |                  |      |         |         |
|-----------|------------------------|------------------|------|---------|---------|
| 50076 J10 | M-021131- transmemk    | 252839 TMEM9     | 1012 | 2.668   | 1.862   |
| 50076 J11 | M-025303- TWIST neig   | 221830 TWISTNB   | 2704 | 5.7322  | 1.2022  |
| 50076 J12 | M-007987- interleukin  | 246778 IL27      | 1655 | 1.7523  | 2.7777  |
| 50076 J13 | M-007163- Sp8 transcr  | 221833 SP8       | 1380 | 2.971   | 1.559   |
| 50076 J14 | M-015701- sperm equi   | 246777 SPESP1    | 3558 | 6.127   | 1.597   |
| 50076 J15 | M-018012- JAZF zinc fi | 221895 JAZF1     | 2852 | 4.9088  | 0.3788  |
| 50076 J16 | M-013602- DNA direct   | 246721 POLR2J2   | 1018 | 2.6523  | 1.8777  |
| 50076 J17 | M-016181- chromoson    | 221908 C7orf47   | 1731 | 4.2172  | 0.3128  |
| 50076 J18 | M-015764- chromoson    | 246705 C21orf94  | 1381 | 2.462   | 2.068   |
| 50076 J19 | M-016251- glypican 2   | 221914 GPC2      | 1744 | 3.211   | 1.319   |
| 50076 J20 | M-017000- chromoson    | 246704 C21orf93  | 1904 | 1.9958  | 2.5342  |
| 50076 J21 | M-016785- chromoson    | 221927 C7orf27   | 2932 | 5.9004  | 1.3704  |
| 50076 J23 | M-018964- sidekick ho  | 221935 SDK1      | 1272 | 6.2107  | 1.6807  |
| 50076 K02 | M-017799- transmemk    | 219902 TMEM136   | 3971 | 2.4931  | 2.0369  |
| 50076 K04 | M-015590- tubulin folc | 219899 TBCEL     | 3533 | 5.2363  | 0.7063  |
| 50076 K05 | M-018474- ankyrin rep  | 203286 ANKS6     | 3165 | 2.4645  | 2.0655  |
| 50076 K06 | M-007555- solute carri | 219855 SLC37A2   | 2016 | 2.5794  | 1.9506  |
| 50076 K07 | M-016811- sushi doma   | 203328 SUSD3     | 2799 | 3.3941  | 1.1359  |
| 50076 K08 | M-026532- hypothetic   | 219854 LOC219854 | 1832 | 5.2948  | 0.7648  |
| 50076 K09 | M-007349- solute carri | 203427 SLC25A43  | 1282 | 2.8861  | 1.6439  |
| 50076 K10 | M-016600- hydroletha   | 219844 HYLS1     | 927  | 5.0701  | 0.5401  |
| 50076 K11 | M-018780- chromoson    | 203429 CXorf50   | 2659 | 5.378   | 0.848   |
| 50076 K12 | M-016656- chromoson    | 219833 C11orf45  | 2822 | 12.828  | 8.298   |
| 50076 K13 | M-016899- zinc finger, | 203430 ZCCHC5    | 1197 | 6.4327  | 1.9027  |
| 50076 K14 | M-017071- chromoson    | 219793 C10orf27  | 2084 | 6.142   | 1.612   |
| 50076 K15 | M-024786- Nik related  | 203447 NRK       | 3159 | 2.7224  | 1.8076  |
| 50076 K16 | M-016664- pleckstrin l | 219790 PLEKHK1   | 2424 | 4.8267  | 0.2967  |
| 50076 K17 | M-018958- DEAD/H (A    | 203522 DDX26B    | 1411 | 7.725   | 3.195   |
| 50076 K18 | M-015828- connexin4C   | 219770 CX40.1    | 2392 | 5.8528  | 1.3228  |
| 50076 K19 | M-016030- zinc finger  | 203523 ZNF449    | 2416 | 4.553   | 0.023   |
| 50076 K20 | M-016000- zinc finger  | 219749 ZNF25     | 3086 | 10.175  | 5.645   |
| 50076 K21 | M-031593- hypothetic   | 203547 LOC203547 | 2607 | 8.9375  | 4.4075  |
| 50076 K23 | M-018960- transmemk    | 203562 TMEM31    | 2109 | 6.4011  | 1.8711  |
| 50076 L02 | M-015632- pellino hon  | 246330 PELI3     | 1490 | 0.73826 | 3.79174 |
| 50076 L04 | M-015865- SH3 and cy   | 246329 STAC3     | 2506 | 3.7909  | 0.7391  |
| 50076 L05 | M-008052- monocyte f   | 221938 MMD2      | 1856 | 3.3944  | 1.1356  |
| 50076 L06 | M-008222- lactation el | 246269 LACE1     | 1620 | 2.6543  | 1.8757  |
| 50076 L07 | M-016837- diacylglyce  | 221955 DAGLB     | 1389 | 1.6559  | 2.8741  |
| 50076 L08 | M-012595- ribonuclea   | 246243 RNASEH1   | 1895 | 3.0607  | 1.4693  |
| 50076 L09 | M-021483- chromoson    | 221960 C7orf28B  | 2463 | 4.3443  | 0.1857  |
| 50076 L10 | M-007418- solute carri | 246213 SLC17A8   | 1637 | 1.6494  | 2.8806  |
| 50076 L11 | M-018827- V-set and t  | 222008 VSTM2     | 1731 | 5.7192  | 1.1892  |
| 50076 L12 | M-017012- growth arr   | 246176 GAS2L2    | 1537 | 5.4652  | 0.9352  |
| 50076 L13 | M-007923- transmemk    | 222068 TMED4     | 1228 | 6.759   | 2.229   |
| 50076 L14 | M-025055- chromoson    | 246126 CYorf15A  | 2492 | 8.0257  | 3.4957  |
| 50076 L15 | M-016788- hypothetic   | 222161 DKFZp586I | 2826 | 13.199  | 8.669   |
| 50076 L16 | M-016967- cancer/test  | 246100 CTAG1A    | 4300 | 8.093   | 3.563   |

|                  |                            |                     |             |               |               |
|------------------|----------------------------|---------------------|-------------|---------------|---------------|
| 50076 L17        | M-016789- chromoson        | 222166 C7orf41      | 2917        | 3.4967        | 1.0333        |
| 50076 L18        | M-016263- ATPase, H+       | 245973 ATP6V1C2     | 2371        | 7.8026        | 3.2726        |
| 50076 L19        | M-018053- proline rich     | 222171 PRR15        | 1998        | 3.3534        | 1.1766        |
| 50076 L20        | M-005105- ATPase, H+       | 245972 ATP6V0D2     | 1904        | 11.187        | 6.657         |
| 50076 L21        | M-016790- hypothetical     | 222183 FLJ37078     | 1941        | 8.8614        | 4.3314        |
| 50076 L23        | M-032240- round sper       | 222194 RSBN1L       | 2658        | 9.067         | 4.537         |
| 50076 M02        | M-018463- trypsin don      | 219743 TYSND1       | 3235        | 4.4204        | 0.1096        |
| 50076 M04        | M-016289- chromoson        | 219738 C10orf35     | 3987        | 7.3489        | 2.8189        |
| 50076 M05        | M-032037- P antigen fi     | 203569 PAGE2        | 3902        | 6.4326        | 1.9026        |
| 50076 M06        | M-017070- storkhead l      | 219736 STOX1        | 2508        | 6.2201        | 1.6901        |
| 50076 M07        | M-025053- chromodor        | 203611 CDY2B        | 1404        | 12.749        | 8.219         |
| 50076 M08        | M-029749- hypothetical     | 219690 LOC21969C    | 2751        | 5.8161        | 1.2861        |
| 50076 M09        | M-023566- EPH recept       | 203806 EPHA6        | 1229        | 19.447        | 14.917        |
| 50076 M10        | M-017744- armadillo r      | 219681 ARMC3        | 3073        | 5.7273        | 1.1973        |
| 50076 M11        | M-026787- transmemk        | 203859 TMEM16E      | 2785        | 10.018        | 5.488         |
| 50076 M12        | M-015999- chromoson        | 219670 C10orf63     | 2263        | 8.3959        | 3.8659        |
| <b>50076 M13</b> | <b>M-017860- LAG1 homc</b> | <b>204219 LASS3</b> | <b>1744</b> | <b>20.241</b> | <b>15.711</b> |
| 50076 M14        | M-015827- chromoson        | 219654 C10orf56     | 2614        | 12.089        | 7.559         |
| 50076 M15        | M-017829- protein disl     | 204474 PDILT        | 2342        | 7.2161        | 2.6861        |
| 50076 M16        | M-017890- transmemk        | 219623 TMEM26       | 2887        | 7.9321        | 3.4021        |
| 50076 M17        | M-009033- NLR family,      | 204801 NLRP11       | 2941        | 10.031        | 5.501         |
| 50076 M18        | M-018457- chromoson        | 219621 C10orf107    | 2131        | 9.2914        | 4.7614        |
| 50076 M19        | M-016900- solute carri     | 204962 SLC44A5      | 5101        | 7.9396        | 3.4096        |
| 50076 M20        | M-007158- zinc finger      | 219578 ZNF804B      | 2751        | 11.123        | 6.593         |
| 50076 M21        | M-017019- hypothetical     | 205147 FLJ38377     | 2829        | 6.4687        | 1.9387        |
| 50076 M23        | M-017831- LOC205251        | 205251 LOC205251    | 1821        | 8.2372        | 3.7072        |
| 50076 N02        | M-017614- defensin, b      | 245938 DEFB125      | 2480        | 0.72581       | 3.80419       |
| 50076 N04        | M-017613- defensin, b      | 245936 DEFB123      | 2162        | 1.7114        | 2.8186        |
| 50076 N05        | M-017566- KIAA1324-l       | 222223 KIAA1324L    | 1341        | 0.67114       | 3.85886       |
| 50076 N06        | M-021506- defensin, b      | 245932 DEFB119      | 1833        | 3.928         | 0.602         |
| 50076 N07        | M-016934- hypothetical     | 222229 DKFZp434k    | 2808        | 2.0299        | 2.5001        |
| 50076 N08        | M-016644- defensin, b      | 245909 DEFB106A     | 2837        | 1.5157        | 3.0143        |
| 50076 N09        | M-016147- hypothetical     | 222234 MGC35361     | 2295        | 5.9695        | 1.4395        |
| 50076 N10        | M-016609- defensin, b      | 245908 DEFB105A     | 3466        | 1.1252        | 3.4048        |
| 50076 N11        | M-016001- F-box and l      | 222235 FBXL13       | 2386        | 1.0897        | 3.4403        |
| 50076 N12        | M-016983- PRotein As:      | 245812 MGC40499     | 2763        | 5.1031        | 0.5731        |
| 50076 N13        | M-027347- N-acyl-pho       | 222236 NAPE-PLD     | 3983        | 8.0341        | 3.5041        |
| 50076 N14        | M-015963- vestigial lik    | 245806 VGLL2        | 1577        | 0.50729       | 4.02271       |
| 50076 N15        | M-016979- ataxin 7-lik     | 222255 ATXN7L1      | 3318        | 8.0772        | 3.5472        |
| 50076 N16        | M-017287- membrane         | 245802 MS4A6E       | 2867        | 1.4998        | 3.0302        |
| 50076 N17        | M-016980- hypothetical     | 222256 FLJ23834     | 4028        | 1.0924        | 3.4376        |
| 50076 N18        | M-009141- speedy hor       | 245711 SPDYA        | 2164        | 1.6636        | 2.8664        |
| 50076 N19        | M-016981- chromoson        | 222389 C10orf30     | 2395        | 1.9624        | 2.5676        |
| 50076 N20        | M-016982- sema doma        | 223117 SEMA3D       | 3107        | 2.0921        | 2.4379        |
| 50076 N21        | M-007164- ligand of nu     | 222484 LNX2         | 3266        | 1.4391        | 3.0909        |
| 50076 N23        | M-018443- hypothetical     | 222521 FLJ25791     | 2538        | 0.35461       | 4.17539       |
| 50076 O02        | M-017069- hypothetical     | 219557 MGC26647     | 3545        | 5.4725        | 0.9425        |

|           |                        |                  |        |         |          |
|-----------|------------------------|------------------|--------|---------|----------|
| 50076 O04 | M-016056- mediator o   | 219541 MED19     | 2746   | 5.7174  | 1.1874   |
| 50076 O05 | M-018633- hypothetic   | 205327 FLJ38973  | 2954   | 4.807   | 0.277    |
| 50076 O06 | M-016670- yippee-like  | 219539 YPEL4     | 2092   | 6.6444  | 2.1144   |
| 50076 O07 | M-018471- chromoson    | 205428 C3orf58   | 3306   | 6.8361  | 2.3061   |
| 50076 O08 | M-015895- GS homeok    | 219409 GSH1      | 3679   | 8.9698  | 4.4398   |
| 50076 O09 | M-005946- SUMO1/se     | 205564 SENP5     | 1832   | 6.8231  | 2.2931   |
| 50076 O10 | M-017068- polymerase   | 219404 POLR1C    | 2906   | 13.593  | 9.063    |
| 50076 O11 | M-023709- KIAA2018     | 205717 KIAA2018  | 1841   | 9.3427  | 4.8127   |
| 50076 O12 | M-018895- mitochond    | 219402 MTIF3     | 2732   | 7.5403  | 3.0103   |
| 50076 O13 | M-009017- hypothetic   | 205860 FLJ25801  | 1655   | 6.0423  | 1.5123   |
| 50076 O14 | M-027224- ATPase fan   | 219293 ATAD3C    | 1948   | 6.7248  | 2.1948   |
| 50076 O15 | M-005878- laeverin     | 206338 FLJ90650  | 1621   | 7.773   | 3.243    |
| 50076 O16 | M-017021- family with  | 219287 FAM123A   | 863    | 8.9224  | 4.3924   |
| 50076 O17 | M-007550- solute carri | 206358 SLC36A1   | 867    | 4.4983  | 0.0317   |
| 50076 O18 | M-008124- dehydroge    | 207063 DHRSX     | 2072   | 1.8822  | 2.6478   |
| 50076 O19 | M-024875- chromoson    | 206412 C6orf163  | 2340   | 5.6838  | 1.1538   |
| 50076 O20 | M-017020- chromoson    | 206938 C9orf94   | 2901   | 1.7925  | 2.7375   |
| 50076 O21 | M-024504- KIAA1999 p   | 202149 KIAA1999  | 2489   | 2.0892  | 2.4408   |
| 50076 O23 | M-017421- SPANX fam    | 171489 SPANXE    | 2009   | 3.2354  | 1.2946   |
| 50076 P02 | M-007165- zinc and rir | 223082 ZNRF2     | 1633   | 4.8377  | 0.3077   |
| 50076 P04 | M-019302- coiled-coil  | 223075 CCDC129   | 1402   | 6.4907  | 1.9607   |
| 50076 P05 | M-008978- heparan su   | 222537 HS3ST5    | 2045   | 8.4108  | 3.8808   |
| 50076 P06 | M-018418- hypothetic   | 222967 LOC222967 | 2302   | 6.0382  | 1.5082   |
| 50076 P07 | M-018439- regulatory   | 222546 RFXDC1    | 4442   | 9.5678  | 5.0378   |
| 50076 P08 | M-007508- solute carri | 222962 SLC29A4   | 999    | 8.5085  | 3.9785   |
| 50076 P09 | M-028593- solute carri | 222553 SLC35F1   | 1964   | 2.9532  | 1.5768   |
| 50076 P10 | M-021312- hypothetic   | 222950 FLJ37538  | 2851   | 9.751   | 5.221    |
| 50076 P11 | M-025113- family with  | 222584 FAM83B    | 3934   | 9.4814  | 4.9514   |
| 50076 P12 | M-008437- Fer3-like (C | 222894 FERD3L    | 3999   | 12.528  | 7.998    |
| 50076 P13 | M-028712- benzodiaz    | 222642 BZRPL1    | 2037   | 4.2219  | 0.3081   |
| 50076 P14 | M-016401- transmemk    | 222865 TMEM130   | 2086   | 6.8552  | 2.3252   |
| 50076 P15 | M-018437- unc-5 hom    | 222643 UNC5CL    | 3256   | 5.2211  | 0.6911   |
| 50076 P16 | M-018430- chromoson    | 222826 C6orf146  | 1449   | 4.6929  | 0.1629   |
| 50076 P17 | M-018436- potassium    | 222658 KCTD20    | 1668   | 7.9137  | 3.3837   |
| 50076 P18 | M-025126- chromoson    | 222698 C6orf194  | 3592   | 6.1247  | 1.5947   |
| 50076 P19 | M-016935- peroxisoma   | 222659 PXT1      | 3795   | 6.5349  | 2.0049   |
| 50076 P20 | M-025080- zinc finger  | 222696 ZSCAN23   | 2230   | 5.7399  | 1.2099   |
| 50076 P21 | M-018911- lipoma HM    | 222662 LHFPL5    | 1780   | 6.4607  | 1.9307   |
| 50076 P23 | M-018371- signal pept  | 222663 SCUBE3    | 1999   | 4.002   | 0.528    |
|           |                        | MAD              | 2252.5 | 4.52935 | 2.5022   |
|           |                        | MAD3             |        |         | 7.5066   |
|           |                        | MADc             |        |         | 3.703256 |
| 50076 C22 |                        |                  | 1576   | 35.914  |          |
| 50076 D22 |                        |                  | 2403   | 28.797  |          |
| 50076 E22 |                        |                  | 1651   | 24.349  |          |
| 50076 F22 |                        |                  | 3032   | 36.313  |          |

|           |                                    |      |           |          |          |
|-----------|------------------------------------|------|-----------|----------|----------|
|           |                                    |      | mn        | 2165.5   | 31.34325 |
|           |                                    |      | sd        | 687.8588 | 5.8021   |
| 50076 G22 |                                    |      |           | 722      | 4.1551   |
| 50076 H22 |                                    |      |           | 726      | 0.55096  |
| 50076 I22 |                                    |      |           | 387      | 10.853   |
| 50076 J22 |                                    |      |           | 602      | 6.9767   |
|           |                                    |      | mn        | 609.25   | 5.63394  |
|           |                                    |      | sd        | 158.9452 | 4.361393 |
|           |                                    |      | 3psSD     |          | 17.4063  |
|           |                                    |      | 3ngSD     |          | 13.08418 |
|           |                                    |      | SumSD     |          | 30.49048 |
|           |                                    |      | MeanDf    |          | 25.70931 |
|           |                                    |      | SumovrMn  |          | 1.18597  |
|           |                                    |      | 1minus    |          | -0.18597 |
| 50076 G03 | M-003290- polo-like ki             | 5347 | PLK1 SMAR | 452      | 1.5487   |
| 50076 H03 | M-003290- polo-like ki             | 5347 | PLK1 SMAR | 259      | 3.861    |
| 50076 I03 | D-001206- :siControl non-targetinç |      |           | 3718     | 10.597   |
| 50076 J03 | D-001206- :siControl non-targetinç |      |           | 988      | 7.5911   |
| 50076 K03 | D-001600-( siGLO RISC-free siRNA   |      |           | 4962     | 19.025   |
| 50076 L03 | D-001600-( siGLO RISC-free siRNA   |      |           | 3176     | 23.583   |

| rZ       | cell ct | % inf   | AD      | rZ       | cell ct | % inf  | AD     | rZ       |
|----------|---------|---------|---------|----------|---------|--------|--------|----------|
| 0.646391 | 1374    | 3.9301  | 2.3199  | -0.58668 | 826     | 5.569  | 1.811  | -0.4804  |
| 1.247429 | 544     | 10.662  | 4.412   | 1.113883 | 1100    | 3      | 4.38   | -1.16103 |
| 0.317383 | 427     | 7.0258  | 0.7758  | 0.195333 | 341     | 8.2111 | 0.8311 | 0.219595 |
| 1.254288 | 718     | 7.2423  | 0.9923  | 0.250023 | 938     | 3.838  | 3.542  | -0.93901 |
| 2.10454  | 394     | 11.929  | 5.679   | 1.433943 | 1300    | 8      | 0.62   | 0.163666 |
| 2.02515  | 651     | 11.982  | 5.732   | 1.447332 | 864     | 13.079 | 5.699  | 1.509295 |
| 1.744046 | 428     | 8.1776  | 1.9276  | 0.486292 | 723     | 3.5961 | 3.7839 | -1.0031  |
| 1.560694 | 453     | 9.0508  | 2.8008  | 0.706873 | 853     | 11.137 | 3.757  | 0.994782 |
| 0.867601 | 558     | 11.649  | 5.399   | 1.363212 | 797     | 6.7754 | 0.6046 | -0.16078 |
| 1.070882 | 538     | 14.684  | 8.434   | 2.129891 | 1157    | 4.8401 | 2.5399 | -0.67352 |
| 0.824099 | 721     | 9.8474  | 3.5974  | 0.908105 | 1205    | 7.2199 | 0.1601 | -0.04301 |
| 2.210123 | 795     | 25.409  | 19.159  | 4.839162 | 1214    | 6.7545 | 0.6255 | -0.16632 |
| 0.694321 | 900     | 12.222  | 5.972   | 1.507959 | 1597    | 8.2655 | 0.8855 | 0.234008 |
| 0.147046 | 731     | 10.123  | 3.873   | 0.977725 | 1438    | 2.0862 | 5.2938 | -1.40313 |
| 2.042432 | 453     | 20.751  | 14.501  | 3.662492 | 729     | 13.855 | 6.475  | 1.714888 |
| 2.470164 | 286     | 24.126  | 17.876  | 4.51506  | 655     | 6.2595 | 1.1205 | -0.29746 |
| 2.412917 | 566     | 20.848  | 14.598  | 3.686995 | 711     | 11.111 | 3.731  | 0.987894 |
| 0.423182 | 1346    | 20.728  | 14.478  | 3.656682 | 1019    | 10.795 | 3.415  | 0.904173 |
| 0.827448 | 609     | 21.511  | 15.261  | 3.854477 | 516     | 18.411 | 11.031 | 2.921954 |
| 1.417739 | 611     | 27.823  | 21.573  | 5.448968 | 634     | 17.823 | 10.443 | 2.766169 |
| -0.08167 | 960     | 1.1458  | 5.1042  | -1.29003 | 562     | 4.4484 | 2.9316 | -0.77729 |
| 1.299735 | 1454    | 0.61898 | 5.63102 | -1.42311 | 814     | 6.8796 | 0.5004 | -0.13317 |
| -0.46406 | 1527    | 0.98232 | 5.26768 | -1.33133 | 680     | 4.5588 | 2.8212 | -0.74804 |
| -0.82796 | 1769    | 0.28265 | 5.96735 | -1.50807 | 1451    | 3.3081 | 4.0719 | -1.0794  |
| -0.32959 | 1354    | 1.1078  | 5.1422  | -1.29963 | 2109    | 6.5434 | 0.8366 | -0.22224 |
| 0.042139 | 1278    | 0.86072 | 5.38928 | -1.36204 | 1216    | 2.0559 | 5.3241 | -1.41116 |
| 0.781191 | 1369    | 2.2644  | 3.9856  | -1.00746 | 819     | 9.6459 | 2.2659 | 0.599731 |
| -0.14597 | 1473    | 1.0862  | 5.1638  | -1.30509 | 1549    | 5.2937 | 2.0863 | -0.55334 |
| 0.169297 | 1799    | 5.0028  | 1.2472  | -0.3157  | 2521    | 14.637 | 7.257  | 1.922071 |
| 1.11803  | 1547    | 2.8442  | 3.4058  | -0.86099 | 1969    | 6.1453 | 1.2347 | -0.32772 |
| 0.387348 | 473     | 2.7484  | 3.5016  | -0.88519 | 564     | 6.5603 | 0.8197 | -0.21777 |
| 0.292891 | 1549    | 2.8405  | 3.4095  | -0.86193 | 1272    | 2.044  | 5.336  | -1.41431 |
| 1.969524 | 1603    | 6.7998  | 0.5498  | 0.138242 | 1230    | 6.0163 | 1.3637 | -0.36189 |
| 2.111561 | 1481    | 2.7684  | 3.4816  | -0.88014 | 2261    | 9.4206 | 2.0406 | 0.54004  |
| 0.322649 | 826     | 2.1792  | 4.0708  | -1.02898 | 1393    | 6.2455 | 1.1345 | -0.30117 |
| 2.60437  | 1147    | 6.1029  | 0.1471  | -0.0378  | 1284    | 8.0997 | 0.7197 | 0.190081 |
| 3.889186 | 2076    | 7.2736  | 1.0236  | 0.25793  | 2654    | 12.547 | 5.167  | 1.368347 |
| 3.5908   | 1800    | 7.0556  | 0.8056  | 0.202861 | 1715    | 6.9388 | 0.4412 | -0.11749 |
| 1.001079 | 1483    | 2.3601  | 3.8899  | -0.98328 | 1440    | 6.5278 | 0.8522 | -0.22638 |
| 1.45981  | 1287    | 4.5843  | 1.6657  | -0.42142 | 1070    | 10     | 2.62   | 0.693546 |
| -0.29324 | 2067    | 0.33866 | 5.91134 | -1.49392 | 2282    | 4.0316 | 3.3484 | -0.88772 |
| 2.159897 | 1258    | 3.9746  | 2.2754  | -0.57544 | 1061    | 6.3148 | 1.0652 | -0.28281 |
| -0.57291 | 1699    | 2.2955  | 3.9545  | -0.9996  | 1076    | 2.0446 | 5.3354 | -1.41416 |
| 0.630675 | 4119    | 6.2879  | 0.0379  | 0.00893  | 3815    | 9.5413 | 2.1613 | 0.572018 |
| 0.186066 | 847     | 4.0142  | 2.2358  | -0.56544 | 1191    | 5.4576 | 1.9224 | -0.50992 |
| 6.801218 | 1378    | 24.165  | 17.915  | 4.524911 | 1205    | 16.266 | 8.886  | 2.353658 |

|          |      |        |        |          |      |         |         |          |
|----------|------|--------|--------|----------|------|---------|---------|----------|
| 0.502409 | 1440 | 3.6806 | 2.5694 | -0.64971 | 1477 | 4.6716  | 2.7084  | -0.71816 |
| 0.30299  | 1738 | 3.7975 | 2.4525 | -0.62018 | 1691 | 2.8977  | 4.4823  | -1.18814 |
| -0.15434 | 1041 | 8.3573 | 2.1073 | 0.531686 | 900  | 4.5556  | 2.8244  | -0.74889 |
| -0.02186 | 1529 | 5.4938 | 0.7562 | -0.19167 | 2321 | 4.7824  | 2.5976  | -0.6888  |
| 1.080387 | 1178 | 2.0374 | 4.2126 | -1.0648  | 528  | 3.7879  | 3.5921  | -0.95229 |
| 1.08279  | 2814 | 18.443 | 12.193 | 3.079462 | 4295 | 12.037  | 4.657   | 1.233228 |
| -0.34863 | 810  | 8.0247 | 1.7747 | 0.447668 | 1330 | 9.3985  | 2.0185  | 0.534185 |
| 1.535851 | 2496 | 10.176 | 3.926  | 0.991113 | 2963 | 8.0324  | 0.6524  | 0.172251 |
| 1.169255 | 2351 | 10.208 | 3.958  | 0.999197 | 2831 | 10.385  | 3.005   | 0.795548 |
| 0.462201 | 998  | 17.234 | 10.984 | 2.774053 | 1647 | 3.5823  | 3.7977  | -1.00676 |
| 0.803496 | 2768 | 6.6474 | 0.3974 | 0.099744 | 2112 | 4.4508  | 2.9292  | -0.77666 |
| 0.193141 | 1904 | 4.8845 | 1.3655 | -0.34559 | 1503 | 2.2621  | 5.1179  | -1.35653 |
| 1.60957  | 1349 | 8.0059 | 1.7559 | 0.442918 | 1554 | 7.529   | 0.149   | 0.03888  |
| 1.196258 | 1824 | 10.746 | 4.496  | 1.135102 | 1561 | 4.9327  | 2.4473  | -0.64898 |
| -0.65627 | 3825 | 1.8562 | 4.3938 | -1.11057 | 2460 | 2.8049  | 4.5751  | -1.21272 |
| -0.35581 | 2347 | 5.9651 | 0.2849 | -0.07261 | 1693 | 13.703  | 6.323   | 1.674618 |
| -0.97499 | 2468 | 1.2561 | 4.9939 | -1.26217 | 2368 | 1.9848  | 5.3952  | -1.43    |
| -0.9787  | 1469 | 1.0892 | 5.1608 | -1.30433 | 1466 | 3.5471  | 3.8329  | -1.01608 |
| -0.67607 | 2106 | 3.3713 | 2.8787 | -0.72784 | 2065 | 6.0533  | 1.3267  | -0.35209 |
| -0.50568 | 1891 | 4.9709 | 1.2791 | -0.32376 | 1492 | 3.8874  | 3.4926  | -0.92592 |
| -0.08178 | 1653 | 3.0853 | 3.1647 | -0.80009 | 1953 | 5.7348  | 1.6452  | -0.43647 |
| 0.604266 | 3248 | 5.8805 | 0.3695 | -0.09398 | 3008 | 9.2753  | 1.8953  | 0.501544 |
| 0.138216 | 1204 | 7.0598 | 0.8098 | 0.203922 | 1318 | 6.0698  | 1.3102  | -0.34772 |
| -0.47929 | 2274 | 5.8927 | 0.3573 | -0.0909  | 1035 | 5.8937  | 1.4863  | -0.39438 |
| -0.27974 | 665  | 2.8571 | 3.3929 | -0.85773 | 524  | 8.5878  | 1.2078  | 0.319398 |
| -0.08885 | 708  | 8.6158 | 2.3658 | 0.596987 | 549  | 5.6466  | 1.7334  | -0.45984 |
| 0.185364 | 2428 | 6.4662 | 0.2162 | 0.053971 | 2612 | 7.0827  | 0.2973  | -0.07936 |
| -0.67231 | 1177 | 4.0782 | 2.1718 | -0.54927 | 1085 | 6.2673  | 1.1127  | -0.29539 |
| -0.90946 | 1078 | 2.6902 | 3.5598 | -0.89989 | 944  | 3.4958  | 3.8842  | -1.02967 |
| -0.09952 | 2052 | 3.9961 | 2.2539 | -0.57001 | 1749 | 2.6301  | 4.7499  | -1.25903 |
| 0.381219 | 1918 | 2.7112 | 3.5388 | -0.89459 | 1740 | 4.1954  | 3.1846  | -0.84432 |
| -0.34074 | 836  | 4.067  | 2.183  | -0.5521  | 780  | 3.4615  | 3.9185  | -1.03876 |
| -0.30394 | 1753 | 6.6743 | 0.4243 | 0.106539 | 1579 | 6.0798  | 1.3002  | -0.34507 |
| -0.26824 | 3025 | 6.0826 | 0.1674 | -0.04293 | 1941 | 6.9037  | 0.4763  | -0.12679 |
| -1.0077  | 2837 | 2.7494 | 3.5006 | -0.88494 | 1837 | 1.252   | 6.128   | -1.62415 |
| -1.12191 | 999  | 6.6066 | 0.3566 | 0.089438 | 663  | 4.5249  | 2.8551  | -0.75703 |
| -0.02672 | 1146 | 6.8935 | 0.6435 | 0.161912 | 841  | 2.0214  | 5.3586  | -1.4203  |
| -0.58882 | 1650 | 5.4545 | 0.7955 | -0.2016  | 1459 | 1.5764  | 5.8036  | -1.5382  |
| -0.91769 | 1371 | 8.3151 | 2.0651 | 0.521026 | 1475 | 2.9831  | 4.3969  | -1.16551 |
| -0.67069 | 895  | 3.352  | 2.898  | -0.73272 | 870  | 0.8046  | 6.5754  | -1.74268 |
| -0.52849 | 1400 | 5.1429 | 1.1071 | -0.28031 | 1685 | 1.543   | 5.837   | -1.54705 |
| -0.55099 | 1729 | 5.5523 | 0.6977 | -0.17689 | 1410 | 1.0638  | 6.3162  | -1.67401 |
| -0.30993 | 1603 | 6.7374 | 0.4874 | 0.122479 | 1095 | 1.9178  | 5.4622  | -1.44775 |
| -0.92196 | 928  | 9.375  | 3.125  | 0.78877  | 1191 | 1.7632  | 5.6168  | -1.48871 |
| 0.089853 | 1299 | 4.9269 | 1.3231 | -0.33488 | 452  | 7.0796  | 0.3004  | -0.08018 |
| -0.46123 | 1400 | 5.5    | 0.75   | -0.1901  | 915  | 0.98361 | 6.39639 | -1.69525 |
| -0.21755 | 1096 | 7.938  | 1.688  | 0.425766 | 2084 | 2.6392  | 4.7408  | -1.25662 |

|                |             |               |               |                 |             |               |               |                 |
|----------------|-------------|---------------|---------------|-----------------|-------------|---------------|---------------|-----------------|
| -0.58534       | 1711        | 6.8381        | 0.5881        | 0.147917        | 1693        | 2.2445        | 5.1355        | -1.36119        |
| -0.05032       | 3077        | 11.862        | 5.612         | 1.417018        | 1979        | 5.0025        | 2.3775        | -0.63049        |
| -0.67755       | 3940        | 26.802        | 20.552        | 5.191051        | 1757        | 1.7644        | 5.6156        | -1.48839        |
| 0.9825         | 2027        | 7.3014        | 1.0514        | 0.264953        | 2273        | 3.7835        | 3.5965        | -0.95345        |
| -0.05559       | 2926        | 8.7491        | 2.4991        | 0.63066         | 2187        | 3.9781        | 3.4019        | -0.90189        |
| 0.128522       | 2037        | 5.891         | 0.359         | -0.09133        | 2630        | 6.5019        | 0.8781        | -0.23324        |
| 1.012717       | 2384        | 14.22         | 7.97          | 2.012679        | 905         | 5.1934        | 2.1866        | -0.57991        |
| -0.43566       | 2555        | 3.1703        | 3.0797        | -0.77862        | 1673        | 3.945         | 3.435         | -0.91066        |
| 0.439546       | 3499        | 6.8591        | 0.6091        | 0.153222        | 3501        | 8.5404        | 1.1604        | 0.30684         |
| 0.605508       | 358         | 5.0279        | 1.2221        | -0.30936        | 767         | 10.691        | 3.311         | 0.876619        |
| -0.20851       | 979         | 6.9459        | 0.6959        | 0.175149        | 1624        | 6.5887        | 0.7913        | -0.21024        |
| -0.77358       | 437         | 1.6018        | 4.6482        | -1.17484        | 577         | 5.1993        | 2.1807        | -0.57835        |
| -0.44144       | 872         | 3.7844        | 2.4656        | -0.62349        | 1064        | 3.0075        | 4.3725        | -1.15904        |
| 0.163707       | 1221        | 9.4185        | 3.1685        | 0.799759        | 1449        | 9.2478        | 1.8678        | 0.494258        |
| 0.825152       | 1733        | 11.714        | 5.464         | 1.379631        | 2505        | 13.174        | 5.794         | 1.534464        |
| 1.315018       | 1011        | 15.826        | 9.576         | 2.418375        | 2192        | 12.637        | 5.257         | 1.392192        |
| -0.27558       | 1147        | 5.7541        | 0.4959        | -0.12591        | 666         | 4.6547        | 2.7253        | -0.72264        |
| -0.4255        | 830         | 3.7349        | 2.5151        | -0.63599        | 1249        | 9.4476        | 2.0676        | 0.547193        |
| -0.06801       | 1283        | 13.25         | 7             | 1.767644        | 1431        | 2.7254        | 4.6546        | -1.23378        |
| -1.10796       | 1409        | 2.4131        | 3.8369        | -0.96989        | 1030        | 4.466         | 2.914         | -0.77263        |
| -0.63667       | 672         | 5.3571        | 0.8929        | -0.2262         | 575         | 2.9565        | 4.4235        | -1.17256        |
| 0.887557       | 2426        | 12.366        | 6.116         | 1.544335        | 3572        | 15.342        | 7.962         | 2.108854        |
| 0.727535       | 1523        | 10.243        | 3.993         | 1.008038        | 2415        | 6.6667        | 0.7133        | -0.18958        |
| 1.540442       | 2479        | 15.732        | 9.482         | 2.394629        | 1819        | 7.4766        | 0.0966        | 0.024997        |
| 0.976803       | 1614        | 6.5056        | 0.2556        | 0.063924        | 1586        | 4.855         | 2.525         | -0.66957        |
| 1.841798       | 1179        | 8.5666        | 2.3166        | 0.584558        | 2617        | 9.209         | 1.829         | 0.483979        |
| -0.26656       | 1003        | 7.0788        | 0.8288        | 0.208721        | 1079        | 4.8193        | 2.5607        | -0.67903        |
| -0.92126       | 3128        | 0.86317       | 5.38683       | -1.36143        | 1896        | 4.6941        | 2.6859        | -0.7122         |
| -0.05262       | 1716        | 3.3217        | 2.9283        | -0.74037        | 1308        | 12.385        | 5.005         | 1.325427        |
| -0.83355       | 1574        | 1.7154        | 4.5346        | -1.14614        | 1792        | 10.1          | 2.72          | 0.72004         |
| -0.65698       | 2650        | 9.5472        | 3.2972        | 0.83227         | 2598        | 15.512        | 8.132         | 2.153893        |
| -0.92825       | 1503        | 3.1936        | 3.0564        | -0.77273        | 1801        | 9.2726        | 1.8926        | 0.500829        |
| -1.07114       | 1433        | 2.3029        | 3.9471        | -0.99773        | 1572        | 9.2875        | 1.9075        | 0.504776        |
| -0.8568        | 3059        | 7.4861        | 1.2361        | 0.31161         | 1280        | 15.469        | 8.089         | 2.142501        |
| -0.60478       | 1576        | 1.9036        | 4.3464        | -1.0986         | 1406        | 7.8236        | 0.4436        | 0.116931        |
| -1.0078        | 1805        | 2.0499        | 4.2001        | -1.06164        | 1622        | 6.5968        | 0.7832        | -0.2081         |
| -1.06993       | 1092        | 3.1136        | 3.1364        | -0.79294        | 773         | 9.5731        | 2.1931        | 0.580443        |
| -0.58269       | 1725        | 3.5942        | 2.6558        | -0.67153        | 1397        | 9.0909        | 1.7109        | 0.452689        |
| -1.12532       | 1470        | 2.585         | 3.665         | -0.92647        | 1303        | 5.2187        | 2.1613        | -0.57321        |
| -1.01738       | 2279        | 3.3348        | 2.9152        | -0.73706        | 2908        | 12.792        | 5.412         | 1.433257        |
| -0.32419       | 2353        | 4.3774        | 1.8726        | -0.47369        | 2352        | 6.1224        | 1.2576        | -0.33378        |
| 0.005819       | 1007        | 2.7805        | 3.4695        | -0.87708        | 1061        | 8.4826        | 1.1026        | 0.291526        |
| -0.45723       | 1198        | 2.8381        | 3.4119        | -0.86253        | 1554        | 9.7169        | 2.3369        | 0.618541        |
| 0.128306       | 1113        | 7.1878        | 0.9378        | 0.236256        | 1074        | 18.529        | 11.149        | 2.953216        |
| 0.220657       | 1737        | 4.0299        | 2.2201        | -0.56147        | 2184        | 8.4249        | 1.0449        | 0.276239        |
| <b>3.42986</b> | <b>2550</b> | <b>20.353</b> | <b>14.103</b> | <b>3.561952</b> | <b>3105</b> | <b>24.928</b> | <b>17.548</b> | <b>4.648565</b> |
| 0.199838       | 1680        | 4.6429        | 1.6071        | -0.40662        | 1772        | 8.2957        | 0.9157        | 0.242009        |



|          |      |        |        |          |      |         |         |          |
|----------|------|--------|--------|----------|------|---------|---------|----------|
| -0.83333 | 1485 | 3.0303 | 3.2197 | -0.81398 | 1861 | 3.9764  | 3.4036  | -0.90234 |
| -0.82936 | 1491 | 5.0973 | 1.1527 | -0.29183 | 2314 | 14.045  | 6.665   | 1.765227 |
| -0.79172 | 1676 | 3.1623 | 3.0877 | -0.78064 | 969  | 9.8039  | 2.4239  | 0.641591 |
| -1.05741 | 1021 | 5.9745 | 0.2755 | -0.07024 | 917  | 4.1439  | 3.2361  | -0.85797 |
| -1.05362 | 1228 | 2.1173 | 4.1327 | -1.04462 | 1722 | 8.8269  | 1.4469  | 0.382745 |
| -0.96195 | 1794 | 7.971  | 1.721  | 0.434102 | 1835 | 10.027  | 2.647   | 0.700699 |
| -1.06847 | 1599 | 2.7517 | 3.4983 | -0.88436 | 536  | 8.5821  | 1.2021  | 0.317888 |
| -0.80865 | 1709 | 6.7291 | 0.4791 | 0.120383 | 2316 | 9.0242  | 1.6442  | 0.435018 |
| -1.09457 | 788  | 2.7919 | 3.4581 | -0.8742  | 591  | 9.9831  | 2.6031  | 0.689068 |
| -1.06208 | 1193 | 8.4661 | 2.2161 | 0.559171 | 1408 | 8.6648  | 1.2848  | 0.339798 |
| -1.12749 | 1323 | 6.5004 | 0.2504 | 0.06261  | 1012 | 11.067  | 3.687   | 0.976236 |
| -0.90981 | 1757 | 10.985 | 4.735  | 1.195477 | 2301 | 14.342  | 6.962   | 1.843914 |
| -1.10113 | 2144 | 6.3899 | 0.1399 | 0.034696 | 762  | 9.7113  | 2.3313  | 0.617058 |
| -1.19219 | 908  | 8.4802 | 2.2302 | 0.562733 | 727  | 0.82531 | 6.55469 | -1.73719 |
| -1.13534 | 1015 | 2.8571 | 3.3929 | -0.85773 | 1148 | 6.0976  | 1.2824  | -0.34035 |
| -1.15654 | 3158 | 12.223 | 5.973  | 1.508211 | 3483 | 12.547  | 5.167   | 1.368347 |
| -0.84076 | 1585 | 2.1451 | 4.1049 | -1.03759 | 1196 | 10.117  | 2.737   | 0.724544 |
| -0.91742 | 2605 | 8.8676 | 2.6176 | 0.660595 | 2771 | 12.089  | 4.709   | 1.247005 |
| -0.75764 | 2122 | 5.7964 | 0.4536 | -0.11523 | 2890 | 11.592  | 4.212   | 1.11533  |
| -0.97039 | 1355 | 2.952  | 3.298  | -0.83376 | 1125 | 9.6889  | 2.3089  | 0.611123 |
| -0.51019 | 3054 | 3.3071 | 2.9429 | -0.74406 | 2691 | 4.5336  | 2.8464  | -0.75472 |
| -1.0301  | 1832 | 10.371 | 4.121  | 1.040373 | 1684 | 7.7791  | 0.3991  | 0.105141 |
| -0.85742 | 1452 | 5.2342 | 1.0158 | -0.25725 | 1779 | 12.591  | 5.211   | 1.380005 |
| -0.70907 | 4766 | 15.401 | 9.151  | 2.311014 | 4425 | 11.593  | 4.213   | 1.115595 |
| -1.1314  | 1439 | 5.6289 | 0.6211 | -0.15754 | 1343 | 6.1802  | 1.1998  | -0.31847 |
| -0.93119 | 1695 | 13.392 | 7.142  | 1.803515 | 1881 | 11.111  | 3.731   | 0.987894 |
| -0.82807 | 907  | 6.946  | 0.696  | 0.175174 | 1050 | 11.524  | 4.144   | 1.097314 |
| -0.92428 | 1039 | 5.0048 | 1.2452 | -0.3152  | 2178 | 8.1726  | 0.7926  | 0.209395 |
| -0.57151 | 2008 | 9.7112 | 3.4612 | 0.873699 | 1637 | 12.156  | 4.776   | 1.264756 |
| -0.89174 | 1068 | 10.674 | 4.424  | 1.116914 | 962  | 15.177  | 7.797   | 2.065139 |
| -0.71852 | 1137 | 16.095 | 9.845  | 2.486327 | 1181 | 12.024  | 4.644   | 1.229784 |
| -0.8133  | 1799 | 5.7254 | 0.5246 | -0.13316 | 1564 | 13.235  | 5.855   | 1.550626 |
| -0.66778 | 2360 | 16.229 | 9.979  | 2.520177 | 2379 | 14.04   | 6.66    | 1.763902 |
| -0.73799 | 1846 | 9.0466 | 2.7966 | 0.705812 | 1508 | 7.626   | 0.246   | 0.064579 |
| -0.52601 | 1363 | 11.299 | 5.049  | 1.274797 | 2190 | 10.228  | 2.848   | 0.753952 |
| 0.419131 | 1651 | 4.8455 | 1.4045 | -0.35544 | 1149 | 6.2663  | 1.1137  | -0.29566 |
| -0.27366 | 1648 | 7.4636 | 1.2136 | 0.305927 | 522  | 14.176  | 6.796   | 1.799934 |
| -0.33907 | 2991 | 10.465 | 4.215  | 1.064118 | 1999 | 9.3047  | 1.9247  | 0.509333 |
| 0.5343   | 1800 | 5.8889 | 0.3611 | -0.09186 | 1501 | 8.5943  | 1.2143  | 0.32112  |
| -0.13514 | 1423 | 5.8327 | 0.4173 | -0.10606 | 1838 | 8.2699  | 0.8899  | 0.235174 |
| -0.80174 | 1514 | 3.5667 | 2.6833 | -0.67848 | 1351 | 3.4049  | 3.9751  | -1.05376 |
| -0.00582 | 2869 | 4.7752 | 1.4748 | -0.3732  | 2258 | 9.256   | 1.876   | 0.496431 |
| -0.2721  | 2037 | 5.6946 | 0.5554 | -0.14095 | 1572 | 11.196  | 3.816   | 1.010414 |
| -0.98448 | 2295 | 3.573  | 2.677  | -0.67689 | 1237 | 4.1229  | 3.2571  | -0.86353 |
| 0.145291 | 3111 | 7.9396 | 1.6896 | 0.42617  | 1214 | 6.2603  | 1.1197  | -0.29725 |
| -0.4602  | 1674 | 3.2258 | 3.0242 | -0.7646  | 1672 | 5.5622  | 1.8178  | -0.4822  |
| -1.03594 | 2067 | 1.2095 | 5.0405 | -1.27394 | 2262 | 3.9788  | 3.4012  | -0.90171 |

|          |      |        |        |          |      |        |        |          |
|----------|------|--------|--------|----------|------|--------|--------|----------|
| -0.50263 | 1226 | 13.458 | 7.208  | 1.820188 | 1402 | 4.4223 | 2.9577 | -0.78421 |
| 0.324809 | 2156 | 9.9258 | 3.6758 | 0.927909 | 3222 | 12.601 | 5.221  | 1.382654 |
| -0.74989 | 1170 | 1.3675 | 4.8825 | -1.23403 | 1854 | 6.5804 | 0.7996 | -0.21244 |
| -0.42081 | 949  | 1.7914 | 4.4586 | -1.12694 | 1304 | 1.4571 | 5.9229 | -1.56981 |
| 0.431418 | 2223 | 9.8965 | 3.6465 | 0.920508 | 2504 | 11.581 | 4.201  | 1.112415 |
| 0.102464 | 1771 | 3.3315 | 2.9185 | -0.73789 | 2031 | 6.3516 | 1.0284 | -0.27306 |
| -0.50686 | 735  | 3.8095 | 2.4405 | -0.61715 | 1101 | 3.6331 | 3.7469 | -0.9933  |
| -0.08429 | 1297 | 8.1727 | 1.9227 | 0.485054 | 1633 | 8.6957 | 1.3157 | 0.347985 |
| -0.55825 | 1479 | 3.1778 | 3.0722 | -0.77672 | 1533 | 4.8924 | 2.4876 | -0.65966 |
| -0.356   | 2058 | 7.9203 | 1.6703 | 0.421295 | 1520 | 4.0789 | 3.3011 | -0.87519 |
| -0.68414 | 1798 | 5.673  | 0.577  | -0.1464  | 2199 | 7.2306 | 0.1494 | -0.04018 |
| 0.370228 | 1433 | 4.6057 | 1.6443 | -0.41602 | 2021 | 4.8986 | 2.4814 | -0.65802 |
| 0.454019 | 652  | 6.9018 | 0.6518 | 0.164009 | 1029 | 5.2478 | 2.1322 | -0.5655  |
| -0.54985 | 1720 | 2.093  | 4.157  | -1.05075 | 1430 | 4.1958 | 3.1842 | -0.84422 |
| 0.1909   | 3090 | 8.6731 | 2.4231 | 0.611462 | 1052 | 16.255 | 8.875  | 2.350744 |
| -0.55758 | 2162 | 3.9315 | 2.3185 | -0.58633 | 782  | 5.4987 | 1.8813 | -0.49903 |
| -0.52655 | 2025 | 4.9383 | 1.3117 | -0.332   | 1123 | 7.0347 | 0.3453 | -0.09208 |
| -0.30655 | 1933 | 4.2938 | 1.9562 | -0.49481 | 1283 | 8.0281 | 0.6481 | 0.171111 |
| 0.206696 | 2023 | 6.7227 | 0.4727 | 0.118766 | 1018 | 9.2338 | 1.8538 | 0.490549 |
| -0.44373 | 1646 | 5.164  | 1.086  | -0.27498 | 529  | 9.2628 | 1.8828 | 0.498232 |
| 0.14602  | 757  | 10.04  | 3.79   | 0.956758 | 431  | 16.473 | 9.093  | 2.4085   |
| 0.229163 | 1978 | 7.9879 | 1.7379 | 0.438371 | 1586 | 12.169 | 4.789  | 1.2682   |
| 2.240906 | 2091 | 13.247 | 6.997  | 1.766887 | 1847 | 13.535 | 6.155  | 1.630108 |
| 0.513967 | 1542 | 9.4682 | 3.2182 | 0.812314 | 565  | 19.823 | 12.443 | 3.296048 |
| 0.435468 | 1711 | 9.6435 | 3.3935 | 0.856597 | 548  | 11.679 | 4.299  | 1.13838  |
| -0.48794 | 3508 | 8.9225 | 2.6725 | 0.674463 | 3132 | 13.282 | 5.902  | 1.563078 |
| 0.080294 | 2569 | 4.1261 | 2.1239 | -0.53717 | 1361 | 5.8046 | 1.5754 | -0.41798 |
| 0.86293  | 1107 | 5.6007 | 0.6493 | -0.16467 | 912  | 19.298 | 11.918 | 3.156955 |
| 0.357375 | 2793 | 5.7644 | 0.4856 | -0.12331 | 1953 | 8.6534 | 1.2734 | 0.336778 |
| 0.006386 | 3703 | 10.937 | 4.687  | 1.183351 | 2270 | 13.524 | 6.144  | 1.627193 |
| 1.52451  | 3518 | 9.6362 | 3.3862 | 0.854753 | 1868 | 9.6895 | 2.3095 | 0.611282 |
| 1.190344 | 2388 | 7.0771 | 0.8271 | 0.208292 | 1822 | 10.154 | 2.774  | 0.734347 |
| 0.505434 | 2227 | 4.5802 | 1.6698 | -0.42246 | 1426 | 7.3633 | 0.0167 | -0.00502 |
| -1.02372 | 1675 | 2.6866 | 3.5634 | -0.9008  | 2066 | 1.8393 | 5.5407 | -1.46855 |
| -0.19941 | 2001 | 2.4988 | 3.7512 | -0.94824 | 2199 | 6.2301 | 1.1499 | -0.30525 |
| -0.30647 | 2528 | 4.6282 | 1.6218 | -0.41033 | 988  | 5.4656 | 1.9144 | -0.5078  |
| -0.50632 | 1611 | 1.1794 | 5.0706 | -1.28154 | 1105 | 1.3575 | 6.0225 | -1.5962  |
| -0.77593 | 3160 | 3.3861 | 2.8639 | -0.7241  | 1842 | 8.1433 | 0.7633 | 0.201632 |
| -0.39658 | 1716 | 2.6807 | 3.5693 | -0.90229 | 1085 | 2.8571 | 4.5229 | -1.19889 |
| -0.04997 | 2344 | 7.0392 | 0.7892 | 0.198718 | 1404 | 5.4131 | 1.9669 | -0.52171 |
| -0.77768 | 2603 | 5.2247 | 1.0253 | -0.25965 | 1426 | 5.6101 | 1.7699 | -0.46951 |
| 0.321298 | 2212 | 7.7306 | 1.4806 | 0.373374 | 1349 | 5.4855 | 1.8945 | -0.50252 |
| 0.25271  | 1820 | 4.8352 | 1.4148 | -0.35804 | 1351 | 8.9563 | 1.5763 | 0.417028 |
| 0.602078 | 1856 | 5.9267 | 0.3233 | -0.08231 | 647  | 6.0278 | 1.3522 | -0.35885 |
| 0.944129 | 1475 | 4.6102 | 1.6398 | -0.41488 | 1524 | 3.6089 | 3.7711 | -0.99971 |
| 2.341088 | 2913 | 5.5613 | 0.6887 | -0.17462 | 1387 | 10.526 | 3.146  | 0.832904 |
| 0.962302 | 3305 | 6.475  | 0.225  | 0.056194 | 2211 | 4.1158 | 3.2642 | -0.86541 |

|                 |             |               |               |                 |             |               |               |                |
|-----------------|-------------|---------------|---------------|-----------------|-------------|---------------|---------------|----------------|
| -0.27885        | 1430        | 3.4965        | 2.7535        | -0.69621        | 1206        | 9.2869        | 1.9069        | 0.504617       |
| 0.883884        | 1791        | 4.9135        | 1.3365        | -0.33826        | 1695        | 6.8437        | 0.5363        | -0.14268       |
| -0.31754        | 2001        | 6.6467        | 0.3967        | 0.099567        | 1444        | 15.859        | 8.479         | 2.245827       |
| 1.797783        | 1355        | 8.8561        | 2.6061        | 0.65769         | 1157        | 17.373        | 9.993         | 2.646946       |
| 1.169795        | 2378        | 7.233         | 0.983         | 0.247674        | 1381        | 8.979         | 1.599         | 0.423042       |
| 1.225314        | 2155        | 12.436        | 6.186         | 1.562018        | 1647        | 7.4074        | 0.0274        | 0.006663       |
| -0.02942        | 1268        | 5.5205        | 0.7295        | -0.18493        | 1545        | 3.4304        | 3.9496        | -1.047         |
| 0.761371        | 1677        | 4.4723        | 1.7777        | -0.44971        | 1581        | 4.4276        | 2.9524        | -0.7828        |
| 0.51394         | 1283        | 4.9883        | 1.2617        | -0.31937        | 2292        | 6.7627        | 0.6173        | -0.16414       |
| 0.456558        | 2901        | 6.8942        | 0.6442        | 0.162089        | 1963        | 6.9791        | 0.4009        | -0.10681       |
| 2.219574        | 1132        | 7.4205        | 1.1705        | 0.295039        | 1451        | 6.0648        | 1.3152        | -0.34904       |
| 0.347465        | 2880        | 2.8472        | 3.4028        | -0.86023        | 1709        | 2.1065        | 5.2735        | -1.39776       |
| 4.028252        | 1984        | 14.315        | 8.065         | 2.036677        | 875         | 13.6          | 6.22          | 1.647329       |
| 0.323486        | 2831        | 4.5214        | 1.7286        | -0.43731        | 2224        | 3.0126        | 4.3674        | -1.15769       |
| 1.482115        | 2413        | 9.5731        | 3.3231        | 0.838813        | 1813        | 11.031        | 3.651         | 0.966699       |
| 1.044095        | 1691        | 4.0213        | 2.2287        | -0.56364        | 874         | 10.755        | 3.375         | 0.893575       |
| <b>4.242658</b> | <b>1583</b> | <b>25.079</b> | <b>18.829</b> | <b>4.755799</b> | <b>1633</b> | <b>21.127</b> | <b>13.747</b> | <b>3.64153</b> |
| 2.041352        | 2550        | 10.431        | 4.181         | 1.055529        | 1120        | 3.4821        | 3.8979        | -1.0333        |
| 0.72551         | 2165        | 5.5889        | 0.6611        | -0.16765        | 770         | 6.2338        | 1.1462        | -0.30427       |
| 0.918854        | 1892        | 5.2326        | 1.0174        | -0.25765        | 1938        | 6.5015        | 0.8785        | -0.23335       |
| 1.485625        | 2818        | 9.2619        | 3.0119        | 0.7602          | 1664        | 8.6538        | 1.2738        | 0.336884       |
| 1.285909        | 1977        | 4.7547        | 1.4953        | -0.37838        | 683         | 6.4422        | 0.9378        | -0.24906       |
| 0.920879        | 4317        | 3.7294        | 2.5206        | -0.63738        | 2464        | 5.8847        | 1.4953        | -0.39676       |
| 1.780501        | 2482        | 14.222        | 7.972         | 2.013184        | 1082        | 9.7043        | 2.3243        | 0.615203       |
| 0.523688        | 3981        | 7.5107        | 1.2607        | 0.317825        | 2489        | 6.4283        | 0.9517        | -0.25274       |
| 1.001241        | 1167        | 7.455         | 1.205         | 0.303754        | 679         | 15.169        | 7.789         | 2.063019       |
| -1.02708        | 2312        | 9.083         | 2.833         | 0.715007        | 2003        | 2.7459        | 4.6341        | -1.22835       |
| -0.76094        | 1643        | 8.1558        | 1.9058        | 0.480785        | 2066        | 4.8403        | 2.5397        | -0.67346       |
| -1.04184        | 1164        | 8.677         | 2.427         | 0.612447        | 1134        | 4.7619        | 2.6181        | -0.69423       |
| -0.16238        | 1501        | 8.994         | 2.744         | 0.692525        | 1153        | 8.5863        | 1.2063        | 0.319001       |
| -0.67493        | 3302        | 12.72         | 6.47          | 1.63376         | 3399        | 8.0612        | 0.6812        | 0.179881       |
| -0.81378        | 1492        | 2.2788        | 3.9712        | -1.00382        | 2343        | 7.0849        | 0.2951        | -0.07878       |
| 0.388888        | 1161        | 11.886        | 5.636         | 1.423081        | 1797        | 7.4012        | 0.0212        | 0.005021       |
| -0.91923        | 2720        | 5.2206        | 1.0294        | -0.26068        | 4020        | 7.0647        | 0.3153        | -0.08413       |
| -0.92882        | 2449        | 8.1666        | 1.9166        | 0.483513        | 1909        | 8.2766        | 0.8966        | 0.236949       |
| 0.154931        | 1325        | 12.302        | 6.052         | 1.528168        | 1634        | 10.098        | 2.718         | 0.71951        |
| 0.946397        | 1018        | 9.0373        | 2.7873        | 0.703463        | 1573        | 9.6631        | 2.2831        | 0.604288       |
| -1.08609        | 1330        | 9.8496        | 3.5996        | 0.90866         | 1690        | 12.012        | 4.632         | 1.226605       |
| 0.958035        | 2331        | 9.3522        | 3.1022        | 0.783011        | 1543        | 6.5457        | 0.8343        | -0.22164       |
| -0.81808        | 1771        | 5.4207        | 0.8293        | -0.21014        | 2048        | 7.7148        | 0.3348        | 0.088106       |
| -0.92809        | 4007        | 13.127        | 6.877         | 1.736573        | 2518        | 9.6108        | 2.2308        | 0.590431       |
| -0.77385        | 1060        | 7.5472        | 1.2972        | 0.327045        | 764         | 8.1152        | 0.7352        | 0.194188       |
| -0.69316        | 1215        | 6.2551        | 0.0051        | 0.000644        | 704         | 20.312        | 12.932        | 3.425604       |
| -0.65814        | 1492        | 7.1716        | 0.9216        | 0.232164        | 1904        | 13.498        | 6.118         | 1.620305       |
| -0.83447        | 2766        | 5.7845        | 0.4655        | -0.11824        | 2988        | 5.1874        | 2.1926        | -0.5815        |
| -1.12732        | 1397        | 7.3729        | 1.1229        | 0.283015        | 2502        | 6.275         | 1.105         | -0.29335       |
| 0.254681        | 983         | 10.682        | 4.432         | 1.118935        | 1321        | 4.6177        | 2.7623        | -0.73244       |

|          |        |         |         |          |        |         |          |          |
|----------|--------|---------|---------|----------|--------|---------|----------|----------|
| 0.320812 | 1101   | 10.263  | 4.013   | 1.01309  | 921    | 13.464  | 6.084    | 1.611297 |
| 0.074975 | 931    | 7.304   | 1.054   | 0.26561  | 1035   | 8.8889  | 1.5089   | 0.399171 |
| 0.571133 | 1222   | 7.6923  | 1.4423  | 0.363699 | 1736   | 9.3318  | 1.9518   | 0.516513 |
| 0.622898 | 1498   | 5.5407  | 0.7093  | -0.17982 | 1473   | 7.332   | 0.048    | -0.01331 |
| 1.199066 | 2509   | 8.9279  | 2.6779  | 0.675827 | 1234   | 13.047  | 5.667    | 1.500817 |
| 0.619387 | 1451   | 7.5121  | 1.2621  | 0.318178 | 1541   | 4.8021  | 2.5779   | -0.68358 |
| 2.447481 | 2115   | 12.009  | 5.759   | 1.454152 | 1767   | 9.9038  | 2.5238   | 0.668059 |
| 1.299762 | 1504   | 6.25    | 0       | -0.00064 | 892    | 5.8296  | 1.5504   | -0.41136 |
| 0.813055 | 2476   | 5.6139  | 0.6361  | -0.16133 | 1171   | 5.9778  | 1.4022   | -0.37209 |
| 0.408546 | 1610   | 7.0186  | 0.7686  | 0.193514 | 770    | 11.688  | 4.308    | 1.140764 |
| 0.592843 | 1927   | 11.624  | 5.374   | 1.356896 | 929    | 5.3821  | 1.9979   | -0.52992 |
| 0.875891 | 1296   | 13.117  | 6.867   | 1.734047 | 1181   | 9.6528  | 2.2728   | 0.601559 |
| 1.186267 | 1050   | 13.143  | 6.893   | 1.740615 | 931    | 6.9817  | 0.3983   | -0.10612 |
| -0.00838 | 1058   | 9.2628  | 3.0128  | 0.760427 | 525    | 20      | 12.62    | 3.342943 |
| -0.71482 | 1952   | 3.6373  | 2.6127  | -0.66065 | 1878   | 4.7391  | 2.6409   | -0.70028 |
| 0.311739 | 2442   | 12.162  | 5.912   | 1.492802 | 2103   | 11.175  | 3.795    | 1.00485  |
| -0.73904 | 2726   | 5.6126  | 0.6374  | -0.16166 | 3131   | 7.6653  | 0.2853   | 0.074991 |
| -0.65892 | 2061   | 6.1621  | 0.0879  | -0.02285 | 2946   | 8.0448  | 0.6648   | 0.175536 |
| -0.34941 | 1305   | 9.8851  | 3.6351  | 0.917628 | 1274   | 8.0063  | 0.6263   | 0.165336 |
| 0.083265 | 554    | 0.90253 | 5.34747 | -1.35148 | 829    | 8.9264  | 1.5464   | 0.409107 |
| 0.529629 | 654    | 4.1284  | 2.1216  | -0.53659 | 1291   | 9.5275  | 2.1475   | 0.568362 |
| 1.048118 | 1427   | 2.9432  | 3.3068  | -0.83598 | 1081   | 7.9556  | 0.5756   | 0.151903 |
| 0.407439 | 2852   | 3.8569  | 2.3931  | -0.60517 | 1312   | 12.271  | 4.891    | 1.295224 |
| 1.360546 | 3300   | 4.6667  | 1.5833  | -0.40061 | 3338   | 7.7891  | 0.4091   | 0.107791 |
| 1.0745   | 944    | 2.9661  | 3.2839  | -0.8302  | 1161   | 16.193  | 8.813    | 2.334317 |
| -0.42561 | 1783   | 3.309   | 2.941   | -0.74358 | 2068   | 9.9613  | 2.5813   | 0.683293 |
| 1.410016 | 2111   | 4.1686  | 2.0814  | -0.52643 | 2968   | 11.422  | 4.042    | 1.07029  |
| 1.337215 | 2275   | 4.4835  | 1.7665  | -0.44688 | 3289   | 9.8814  | 2.5014   | 0.662124 |
| 2.159897 | 1954   | 6.9601  | 0.7101  | 0.178736 | 1881   | 12.919  | 5.539    | 1.466905 |
| -0.08302 | 2063   | 5.1381  | 1.1119  | -0.28152 | 1599   | 6.4415  | 0.9385   | -0.24924 |
| 0.628055 | 2333   | 7.7583  | 1.5083  | 0.380371 | 1849   | 8.2747  | 0.8947   | 0.236445 |
| 0.186795 | 1810   | 3.2044  | 3.0456  | -0.77    | 2063   | 8.3374  | 0.9574   | 0.253057 |
| 0.044164 | 1676   | 10.143  | 3.893   | 0.982777 | 1046   | 7.1702  | 0.2098   | -0.05618 |
| 0.913885 | 687    | 11.063  | 4.813   | 1.215181 | 1438   | 8.484   | 1.104    | 0.291897 |
| 0.430797 | 2640   | 11.136  | 4.886   | 1.233621 | 3253   | 10.882  | 3.502    | 0.927223 |
| 0.541564 | 2536   | 12.145  | 5.895   | 1.488507 | 1842   | 9.8806  | 2.5006   | 0.661912 |
| 0.326888 | 1994   | 7.7232  | 1.4732  | 0.371505 | 1967   | 6.7616  | 0.6184   | -0.16443 |
| 0.521528 | 2089   | 10.388  | 4.138   | 1.044667 | 2232   | 10.753  | 3.373    | 0.893045 |
| -0.1424  | 1432   | 7.4022  | 1.1522  | 0.290416 | 2197   | 8.8757  | 1.4957   | 0.395674 |
|          | 1649   | 6.25255 | 2.67475 |          | 1496.5 | 7.38225 | 2.5503   |          |
|          |        |         | 8.02425 |          |        |         | 7.6509   |          |
|          |        |         | 3.95863 |          |        |         | 3.774444 |          |
| 1910     | 33.77  |         | 834     | 18.825   |        |         |          |          |
| 1116     | 27.24  |         | 1466    | 22.442   |        |         |          |          |
| 1180     | 27.119 |         | 1222    | 17.758   |        |         |          |          |
| 1149     | 30.374 |         | 1502    | 22.437   |        |         |          |          |

|          |          |          |          |     |        |
|----------|----------|----------|----------|-----|--------|
| 1338.75  | 29.62575 | 1256     | 20.3655  |     |        |
| 381.7289 | 3.146971 | 307.6015 | 2.434143 |     |        |
| 821      | 1.5834   |          |          | 340 | 16.765 |
| 481      | 4.5738   | 405      | 8.3951   |     |        |
| 751      | 1.9973   |          |          | 223 | 24.215 |
| 458      | 5.0218   | 541      | 7.9482   |     |        |
| 627.75   | 3.294075 | 473      | 8.17165  |     |        |
| 185.1907 | 1.754116 | 96.16652 | 0.316006 |     |        |
|          | 9.440914 |          | 7.30243  |     |        |
|          | 5.262347 |          | 0.948018 |     |        |
|          | 14.70326 |          | 8.250448 |     |        |
|          | 26.33168 |          | 12.19385 |     |        |
|          | 0.558387 |          | 0.676607 |     |        |
|          | 0.441613 |          | 0.323393 |     |        |
| 242      | 2.8926   | 169      | 27.219   |     |        |
| 203      | 5.9113   | 80       | 35       |     |        |
| 1324     | 9.3656   | 1165     | 7.382    |     |        |
| 2036     | 14.882   | 1146     | 5.0611   |     |        |
| 3533     | 27.682   | 3247     | 9.1469   |     |        |
| 3724     | 21.536   | 3181     | 8.9909   |     |        |

x toxic a,b,c

y











x      toxic a,b,c

y

|           |                        |                  | cell ct | % inf  | AD     |
|-----------|------------------------|------------------|---------|--------|--------|
| 50077 A02 | M-007979- interleukin  | 282616 IL28A     | 704     | 5.8239 | 4.3161 |
| 50077 A04 | M-017565- WAP four-c   | 280664 WFDC10B   | 926     | 15.335 | 5.195  |
| 50077 A05 | M-018030- chromoson    | 439940 C8orf15   | 510     | 11.176 | 1.036  |
| 50077 A06 | M-017883- synovial sa  | 280660 SSX9      | 1146    | 12.565 | 2.425  |
| 50077 A07 | M-027667- hypothetic   | 254099 LOC254099 | 1038    | 12.042 | 1.902  |
| 50077 A08 | M-017415- synovial sa  | 280658 SSX7      | 518     | 6.7568 | 3.3832 |
| 50077 A09 | M-026598- EH domain    | 254102 EHBP1L1   | 512     | 14.453 | 4.313  |
| 50077 A10 | M-017420- synovial sa  | 280657 SSX6      | 586     | 8.0205 | 2.1195 |
| 50077 A11 | M-017082- hypothetic   | 254122 FLJ30934  | 803     | 6.3512 | 3.7888 |
| 50077 A12 | M-016555- chromoson    | 280636 C11orf31  | 437     | 7.0938 | 3.0462 |
| 50077 A13 | M-017083- chromoson    | 254158 CXorf58   | 494     | 14.777 | 4.637  |
| 50077 A14 | M-031764- ATP syntha   | 267020 ATP5L2    | 410     | 22.927 | 12.787 |
| 50077 A15 | M-021948- F-box prote  | 254170 FBXO33    | 683     | 17.57  | 7.43   |
| 50077 A16 | M-015665- D-amino ac   | 267012 DAOA      | 914     | 15.208 | 5.068  |
| 50077 A17 | M-016100- tubulin tyrc | 254173 TLL10     | 572     | 21.154 | 11.014 |
| 50077 A18 | M-007168- piggyBac tr  | 267002 PGBD2     | 836     | 16.388 | 6.248  |
| 50077 A19 | M-017084- testis speci | 254187 TSGA10IP  | 725     | 13.103 | 2.963  |
| 50077 A20 | M-015440- nucleosom    | 266812 NAP1L5    | 708     | 17.797 | 7.657  |
| 50077 A21 | M-016101- family with  | 254228 FAM26E    | 834     | 10.791 | 0.651  |
| 50077 A23 | M-009088- bactericida  | 254240 BPIL2     | 812     | 7.1429 | 2.9971 |
| 50077 B02 | M-018154- hypothetic   | 284033 LOC284033 | 2519    | 8.6145 | 1.5255 |
| 50077 B04 | M-018233- chromoson    | 284029 C17orf44  | 1857    | 10.501 | 0.361  |
| 50077 B05 | M-007980- interleukin  | 282617 IL28B     | 1792    | 8.5379 | 1.6021 |
| 50077 B06 | M-023231- chromoson    | 284021 C17orf60  | 2726    | 4.9523 | 5.1877 |
| 50077 B07 | M-007982- interleukin  | 282618 IL29      | 2042    | 10.48  | 0.34   |
| 50077 B08 | M-018673- chromoson    | 284018 C17orf58  | 711     | 10.408 | 0.268  |
| 50077 B09 | M-009008- aquaporin    | 282679 AQP11     | 1509    | 10.205 | 0.065  |
| 50077 B10 | M-018976- vitelline me | 284013 VMO1      | 2068    | 6.7215 | 3.4185 |
| 50077 B11 | M-015667- WD repeat    | 282809 WDR51B    | 634     | 15.457 | 5.317  |
| 50077 B12 | M-030827- hypothetic   | 284009 LOC284009 | 1159    | 6.9888 | 3.1512 |
| 50077 B13 | M-025081- zinc finger  | 282890 ZNF311    | 3040    | 7.2039 | 2.9361 |
| 50077 B14 | M-018235- hexosamin    | 284004 HEXDC     | 1603    | 8.1098 | 2.0302 |
| 50077 B15 | M-018851- chromoson    | 282966 C10orf53  | 1586    | 14.061 | 3.921  |
| 50077 B16 | M-021433- coiled-coil  | 284001 CCDC57    | 2010    | 6.6667 | 3.4733 |
| 50077 B17 | M-027226- chromoson    | 282969 C10orf125 | 1554    | 7.0142 | 3.1258 |
| 50077 B18 | M-022956- hypothetic   | 283999 LOC283999 | 1705    | 3.2845 | 6.8555 |
| 50077 B19 | M-019299- chromoson    | 282973 C10orf39  | 873     | 9.3929 | 0.7471 |
| 50077 B20 | M-022953- chromoson    | 283994 C17orf52  | 2062    | 8.9719 | 1.1681 |
| 50077 B21 | M-029700- hypothetic   | 282980 LOC282980 | 1193    | 4.4426 | 5.6974 |
| 50077 B23 | M-018342- biogenesis   | 282991 BLOC1S2   | 2458    | 2.8885 | 7.2515 |
| 50077 C02 | M-019148- melanoma     | 266740 MAGEA2B   | 3357    | 6.7024 | 3.4376 |
| 50077 C04 | M-015966- heparan su   | 266722 HS6ST3    | 2110    | 10.474 | 0.334  |
| 50077 C05 | M-018740- cornichon l  | 254263 CNIH2     | 1832    | 5.0764 | 5.0636 |
| 50077 C06 | M-015877- bestrophin   | 266675 BEST4     | 2612    | 10.873 | 0.733  |
| 50077 C07 | M-015758- chromoson    | 254268 C1orf62   | 1500    | 4.7333 | 5.4067 |
| 50077 C08 | M-016633- orofacial cl | 266553 OFCC1     | 543     | 18.785 | 8.645  |

|           |                        |                  |      |        |        |
|-----------|------------------------|------------------|------|--------|--------|
| 50077 C09 | M-023035- hypothetic   | 254272 FLJ40244  | 1212 | 4.868  | 5.272  |
| 50077 C10 | M-010739- six transme  | 261729 STEAP2    | 702  | 9.5442 | 0.5958 |
| 50077 C11 | M-031962- phytanoyl-l  | 254295 PHYHD1    | 1656 | 6.0386 | 4.1014 |
| 50077 C12 | M-019323- TIP41, TOR   | 261726 TIPRL     | 1678 | 3.9928 | 6.1472 |
| 50077 C13 | M-029716- hypothetic   | 254312 LOC254312 | 795  | 12.201 | 2.061  |
| 50077 C14 | M-016809- chromoson    | 260436 C4orf7    | 1106 | 15.19  | 5.05   |
| 50077 C15 | M-017615- minichrom    | 254394 MCM9      | 1339 | 12.621 | 2.481  |
| 50077 C16 | M-016808- PYD (pyrin   | 260434 PYDC1     | 1732 | 12.587 | 2.447  |
| 50077 C17 | M-018375- chromoson    | 254427 C10orf47  | 889  | 10.011 | 0.129  |
| 50077 C18 | M-013551- NOL1/NOP     | 260294 NSUN5C    | 930  | 15.376 | 5.236  |
| 50077 C19 | M-007577- solute carri | 254428 SLC41A1   | 2021 | 10.886 | 0.746  |
| 50077 C20 | M-009129- cytochrom    | 260293 CYP4X1    | 2591 | 17.213 | 7.073  |
| 50077 C21 | M-015759- chromoson    | 254528 C16orf73  | 1965 | 7.5318 | 2.6082 |
| 50077 C23 | M-016375- 1-acylglyce  | 254531 AGPAT7    | 3939 | 17.873 | 7.733  |
| 50077 D02 | M-018939- family with  | 283991 FAM100B   | 2975 | 4.0672 | 6.0728 |
| 50077 D04 | M-022947- tRNA splici  | 283989 TSEN54    | 2361 | 10.885 | 0.745  |
| 50077 D05 | M-029656- RNA bindin   | 282996 RBM20     | 2357 | 12.261 | 2.121  |
| 50077 D06 | M-014638- chromoson    | 283987 C17orf28  | 4071 | 9.0887 | 1.0513 |
| 50077 D07 | M-026290- family with  | 283008 FAM22A    | 3854 | 12.74  | 2.6    |
| 50077 D08 | M-008932- fatty acid d | 283985 FADS6     | 1092 | 6.5018 | 3.6382 |
| 50077 D09 | M-029744- chromoson    | 283025 C10orf40  | 1178 | 5.1783 | 4.9617 |
| 50077 D10 | M-018924- chromoson    | 283982 C17orf54  | 2682 | 10.03  | 0.11   |
| 50077 D11 | M-019300- hypothetic   | 283031 LOC283031 | 2306 | 8.7598 | 1.3802 |
| 50077 D12 | M-018238- hypothetic   | 283971 MGC34761  | 1974 | 4.5086 | 5.6314 |
| 50077 D13 | M-029757- hypothetic   | 283050 LOC283050 | 1966 | 3.2045 | 6.9355 |
| 50077 D14 | M-022581- pyridoxal-d  | 283970 PDXDC2    | 2608 | 8.8957 | 1.2443 |
| 50077 D15 | M-018344- mohawk hc    | 283078 MKX       | 3268 | 8.5985 | 1.5415 |
| 50077 D16 | M-030774- hypothetic   | 283951 LOC283951 | 1931 | 3.6769 | 6.4631 |
| 50077 D17 | M-027228- FLJ46111 p   | 283102 FLJ46111  | 2416 | 9.4371 | 0.7029 |
| 50077 D18 | M-022881- hypothetic   | 283948 FLJ36208  | 1929 | 6.48   | 3.66   |
| 50077 D19 | M-018057- hypothetic   | 283127 FLJ37045  | 3393 | 5.7471 | 4.3929 |
| 50077 D20 | M-022795- hypothetic   | 283933 MGC46336  | 2974 | 4.4385 | 5.7015 |
| 50077 D21 | M-026592- hypothetic   | 283129 LOC283129 | 4803 | 11.264 | 1.124  |
| 50077 D23 | M-007351- solute carri | 283130 SLC25A45  | 1142 | 1.7513 | 8.3887 |
| 50077 E02 | M-008109- interleukin  | 259307 IL4I1     | 2574 | 8.9744 | 1.1656 |
| 50077 E04 | M-017800- taste recep  | 259296 TAS2R50   | 994  | 2.9175 | 7.2225 |
| 50077 E05 | M-018935- nudix (nucl  | 254552 NUDT8     | 2346 | 9.5908 | 0.5492 |
| 50077 E06 | M-017832- taste recep  | 259295 TAS2R49   | 3145 | 10.556 | 0.416  |
| 50077 E07 | M-019195- lysozyme-li  | 254773 LYG2      | 2446 | 10.589 | 0.449  |
| 50077 E08 | M-017805- taste recep  | 259291 TAS2R45   | 3088 | 11.723 | 1.583  |
| 50077 E09 | M-015760- chromoson    | 254778 C8orf46   | 766  | 7.3107 | 2.8293 |
| 50077 E10 | M-017825- taste recep  | 259290 TAS2R44   | 3236 | 10.074 | 0.066  |
| 50077 E11 | M-023685- hypothetic   | 254808 LOC254808 | 1404 | 15.385 | 5.245  |
| 50077 E12 | M-017779- taste recep  | 259289 TAS2R43   | 2149 | 13.495 | 3.355  |
| 50077 E13 | M-023654- N-acetylate  | 254827 NAALADL2  | 911  | 7.0252 | 3.1148 |
| 50077 E14 | M-017033- family with  | 259282 FAM44A    | 3585 | 11.548 | 1.408  |
| 50077 E15 | M-015761- chromoson    | 254863 C17orf61  | 949  | 8.0084 | 2.1316 |

|           |                        |                  |      |         |         |
|-----------|------------------------|------------------|------|---------|---------|
| 50077 E16 | M-017481- WAP four-c   | 259240 WFDC9     | 3778 | 12.785  | 2.645   |
| 50077 E17 | M-018381- zinc finger, | 254887 ZDHC23    | 1261 | 5.3925  | 4.7475  |
| 50077 E18 | M-017480- WAP four-c   | 259239 WFDC11    | 2578 | 10.667  | 0.527   |
| 50077 E19 | M-018695- keratin assi | 254950 KRTAP15-1 | 1081 | 9.6207  | 0.5193  |
| 50077 E20 | M-016265- transmemk    | 259236 TMIE      | 4241 | 9.4317  | 0.7083  |
| 50077 E21 | M-031946- chromoson    | 254956 C9orf18   | 1399 | 3.6455  | 6.4945  |
| 50077 E23 | M-015664- REX1, RNA    | 254958 REXO1L1   | 1676 | 3.9379  | 6.2021  |
| 50077 F02 | M-018124- hypothetic   | 283932 LOC283932 | 2878 | 3.5789  | 6.5611  |
| 50077 F04 | M-022678- hypothetic   | 283922 LOC283922 | 2261 | 4.1575  | 5.9825  |
| 50077 F05 | M-018326- chromoson    | 283135 C11orf72  | 3820 | 8.4293  | 1.7107  |
| 50077 F06 | M-030696- hypothetic   | 283914 LOC283914 | 3482 | 7.1511  | 2.9889  |
| 50077 F07 | M-029808- hypothetic   | 283143 LOC283143 | 4175 | 10.587  | 0.447   |
| 50077 F08 | M-030734- hypothetic   | 283901 LOC283901 | 3531 | 8.1563  | 1.9837  |
| 50077 F09 | M-010858- B-cell CLL/I | 283149 BCL9L     | 1470 | 0.7483  | 9.3917  |
| 50077 F10 | M-003994- coiled-coil  | 283899 CCDC95    | 2792 | 2.6862  | 7.4538  |
| 50077 F11 | M-026523- forkhead b   | 283150 FOXR1     | 4271 | 12.058  | 1.918   |
| 50077 F12 | M-003990- chromoson    | 283897 C16orf54  | 522  | 6.3218  | 3.8182  |
| 50077 F13 | M-029810- hypothetic   | 283152 LOC283152 | 1693 | 5.0797  | 5.0603  |
| 50077 F14 | M-030608- hypothetic   | 283887 LOC283887 | 2404 | 5.0333  | 5.1067  |
| 50077 F15 | M-018321- proline rich | 283165 PRR10     | 2791 | 2.8305  | 7.3095  |
| 50077 F16 | M-030680- hypothetic   | 283876 FLJ39639  | 2070 | 3.0435  | 7.0965  |
| 50077 F17 | M-018318- chromoson    | 283171 C11orf44  | 5157 | 8.0085  | 2.1315  |
| 50077 F18 | M-022877- hypothetic   | 283871 LOC283871 | 2026 | 3.307   | 6.833   |
| 50077 F19 | M-018316- hypothetic   | 283176 FLJ90231  | 5616 | 7.7991  | 2.3409  |
| 50077 F20 | M-009063- chromoson    | 283870 C16orf79  | 2909 | 1.3407  | 8.7993  |
| 50077 F21 | M-017923- chromoson    | 283197 C11orf64  | 5849 | 8.6511  | 1.4889  |
| 50077 F23 | M-008479- procollager  | 283208 P4HA3     | 1440 | 0.34722 | 9.79278 |
| 50077 G02 | M-017052- Down synd    | 259234 DSCR10    | 1993 | 3.0105  | 7.1295  |
| 50077 G04 | M-006519- sodium lea   | 259232 NALCN     | 1975 | 15.747  | 5.607   |
| 50077 G05 | M-023564- hypothetic   | 255025 LOC255025 | 1142 | 13.748  | 3.608   |
| 50077 G06 | M-019477- sphingomy    | 259230 SGMS1     | 3629 | 7.9361  | 2.2039  |
| 50077 G07 | M-018370- MPV17 mit    | 255027 MPV17L    | 576  | 13.021  | 2.881   |
| 50077 G08 | M-026318- heat shock   | 259217 HSPA12A   | 2858 | 12.001  | 1.861   |
| 50077 G09 | M-018801- transmemk    | 255043 TMEM86B   | 4363 | 13.385  | 3.245   |
| 50077 G10 | M-019226- ALS2 C-terr  | 259173 ALS2CL    | 1186 | 3.7099  | 6.4301  |
| 50077 G11 | M-015762- hypothetic   | 255055 FLJ25378  | 3232 | 6.25    | 3.89    |
| 50077 G12 | M-015625- ankyrin rep  | 257629 ANKS4B    | 1668 | 8.9329  | 1.2071  |
| 50077 G13 | M-015763- chromoson    | 255057 C19orf26  | 1345 | 13.532  | 3.392   |
| 50077 G14 | M-015573- family with  | 257415 FAM133B   | 2337 | 11.767  | 1.627   |
| 50077 G15 | M-016778- tachykinin   | 255061 TAC4      | 2639 | 5.0019  | 5.1381  |
| 50077 G16 | M-015572- mitogen-ac   | 257397 MAP3K7IP3 | 2159 | 12.923  | 2.783   |
| 50077 G17 | M-017863- cancer susc  | 255082 CASC2     | 1905 | 15.328  | 5.188   |
| 50077 G18 | M-028489- hypothetic   | 257396 LOC257396 | 3851 | 5.0896  | 5.0504  |
| 50077 G19 | M-019301- coiled-coil  | 255101 CCDC108   | 3090 | 5.6958  | 4.4442  |
| 50077 G20 | M-015876- SH3 and PX   | 257364 SH3PX3    | 3690 | 8.8076  | 1.3324  |
| 50077 G21 | M-018952- transmemk    | 255104 TMCO4     | 2305 | 5.0325  | 5.1075  |
| 50077 G23 | M-015942- chromoson    | 255119 C4orf22   | 2877 | 3.1283  | 7.0117  |

|                  |                               |                        |             |               |               |
|------------------|-------------------------------|------------------------|-------------|---------------|---------------|
| 50077 H02        | M-030632- hypothetical        | 283867 LOC283867       | 1711        | 5.1432        | 4.9968        |
| 50077 H04        | M-018244- chromosom           | 283860 C16orf81        | 1365        | 10.989        | 0.849         |
| 50077 H05        | M-018432- phosphogl           | 283209 PGM2L1          | 3517        | 16.434        | 6.294         |
| 50077 H06        | M-030623- hypothetical        | 283854 LOC283854       | 2207        | 11.056        | 0.916         |
| <b>50077 H07</b> | <b>M-018305- hypothetical</b> | <b>283212 FLJ33790</b> | <b>4121</b> | <b>28.149</b> | <b>18.009</b> |
| 50077 H08        | M-018232- exocyst cor         | 283849 EXOC3L          | 2169        | 5.7169        | 4.4231        |
| 50077 H09        | M-029918- hypothetical        | 283214 LOC283214       | 4861        | 13.68         | 3.54          |
| 50077 H10        | M-008935- hypothetical        | 283848 FLJ37464        | 2143        | 8.4928        | 1.6472        |
| 50077 H11        | M-026714- potassium           | 283219 KCTD21          | 1819        | 8.4662        | 1.6738        |
| 50077 H12        | M-018247- coiled-coil         | 283847 CCDC79          | 1593        | 10.232        | 0.092         |
| 50077 H13        | M-018066- hypothetical        | 283225 FLJ37266        | 1381        | 13.613        | 3.473         |
| 50077 H14        | M-018249- NODAL mo            | 283820 NOMO2           | 2069        | 11.986        | 1.846         |
| 50077 H15        | M-018303- EF-hand ca          | 283229 EFCAB4A         | 2270        | 12.555        | 2.415         |
| 50077 H16        | M-031751- F-box and l         | 283807 FBXL22          | 1888        | 6.303         | 3.837         |
| 50077 H17        | M-017925- transmemk           | 283232 TMEM80          | 2848        | 11.482        | 1.342         |
| 50077 H18        | M-018252- hypothetical        | 283796 FLJ35785        | 2606        | 8.9409        | 1.1991        |
| 50077 H19        | M-026590- coiled-coil         | 283234 CCDC88B         | 3033        | 8.7043        | 1.4357        |
| 50077 H20        | M-018880- hypothetical        | 283777 FLJ39743        | 3189        | 12.794        | 2.654         |
| 50077 H21        | M-018302- tetratricop         | 283237 TTC9C           | 3055        | 5.1391        | 5.0009        |
| 50077 H23        | M-007365- hypothetical        | 283238 MGC34821        | 2053        | 4.3838        | 5.7562        |
| 50077 I02        | M-028408- hypothetical        | 257358 LOC257358       | 4851        | 8.39          | 1.75          |
| 50077 I04        | M-021500- urotensin 2         | 257313 UTS2D           | 5377        | 12.479        | 2.339         |
| 50077 I05        | M-030410- hypothetical        | 255177 LOC255177       | 2569        | 5.3328        | 4.8072        |
| 50077 I06        | M-015875- kelch-like 3        | 257240 KLHL34          | 4122        | 7.3993        | 2.7407        |
| 50077 I07        | M-018363- hypothetical        | 255180 FLJ38723        | 1525        | 7.6066        | 2.5334        |
| 50077 I08        | M-015726- coiled-coil         | 257236 CCDC96          | 4090        | 11.198        | 1.058         |
| 50077 I09        | M-010308- phospholip          | 255189 PLA2G4F         | 1945        | 5.0386        | 5.1014        |
| 50077 I10        | M-007167- SNF2 histori        | 257218 SHPRH           | 2872        | 10.968        | 0.828         |
| 50077 I11        | M-015943- chromosom           | 255193 C19orf34        | 1469        | 8.1007        | 2.0393        |
| 50077 I12        | M-017055- Down synd           | 257203 DSCR9           | 3562        | 17.35         | 7.21          |
| 50077 I13        | M-021616- mucopolin 2         | 255231 MCOLN2          | 979         | 7.763         | 2.377         |
| 50077 I14        | M-019309- glutathione         | 257202 GPX6            | 2922        | 5.3046        | 4.8354        |
| 50077 I15        | M-016103- leucine rich        | 255252 LRRC57          | 1016        | 13.78         | 3.64          |
| 50077 I16        | M-018345- neuronal gi         | 257194 NEGR1           | 4658        | 12.538        | 2.398         |
| 50077 I17        | M-018362- cancer/test         | 255313 RP6-166C1       | 1077        | 8.078         | 2.062         |
| 50077 I18        | M-015571- chromosom           | 257169 C9orf43         | 3271        | 3.424         | 6.716         |
| 50077 I19        | M-028155- chromosom           | 255330 C3orf46         | 1328        | 9.7139        | 0.4261        |
| 50077 I20        | M-026520- ring finger         | 257160 RNF214          | 4650        | 12.28         | 2.14          |
| 50077 I21        | M-018355- chromosom           | 255352 C10orf93        | 2295        | 7.7996        | 2.3404        |
| 50077 I23        | M-015944- t-complex           | 255394 TCP11L2         | 1567        | 13.274        | 3.134         |
| 50077 J02        | M-022336- golgi autoa         | 283768 GOLGA8G         | 3144        | 9.8919        | 0.2481        |
| 50077 J04        | M-030486- hypothetical        | 283761 LOC283761       | 1593        | 11.174        | 1.034         |
| 50077 J05        | M-018069- hypothetical        | 283241 LOC283241       | 3488        | 16.17         | 6.03          |
| 50077 J06        | M-008599- phospholip          | 283748 PLA2G4D         | 1796        | 10.523        | 0.383         |
| 50077 J07        | M-018296- REST corep          | 283248 RCOR2           | 3622        | 19.299        | 9.159         |
| 50077 J08        | M-018254- family with         | 283742 FAM98B          | 2761        | 14.56         | 4.42          |
| 50077 J09        | M-018300- chromosom           | 283254 C11orf77        | 3252        | 8.0873        | 2.0527        |

|           |                        |        |           |      |        |        |
|-----------|------------------------|--------|-----------|------|--------|--------|
| 50077 J10 | M-030428- hypothetical | 283731 | LOC283731 | 1339 | 9.1113 | 1.0287 |
| 50077 J11 | M-018298- immunogl     | 283284 | IGSF22    | 2340 | 11.581 | 1.441  |
| 50077 J12 | M-030371- hypothetical | 283697 | LOC283697 | 1805 | 6.9806 | 3.1594 |
| 50077 J13 | M-018288- chromoson    | 283294 | C11orf47  | 4349 | 15.866 | 5.726  |
| 50077 J14 | M-018092- chromoson    | 283687 | C15orf37  | 1305 | 7.433  | 2.707  |
| 50077 J15 | M-032016- olfactory re | 283297 | OR10A4    | 4200 | 11.619 | 1.479  |
| 50077 J16 | M-018970- hypothetical | 283685 | FLJ36144  | 2417 | 12.702 | 2.562  |
| 50077 J17 | M-027229- olfactomec   | 283298 | OLFML1    | 2480 | 11.331 | 1.191  |
| 50077 J18 | M-030495- hypothetical | 283682 | LOC283682 | 2258 | 9.4774 | 0.6626 |
| 50077 J19 | M-018280- chromoson    | 283303 | C11orf36  | 1822 | 7.5741 | 2.5659 |
| 50077 J20 | M-030425- hypothetical | 283677 | LOC283677 | 2320 | 16.681 | 6.541  |
| 50077 J21 | M-018260- chromoson    | 283310 | C12orf64  | 3340 | 16.976 | 6.836  |
| 50077 J23 | M-030110- hypothetical | 283314 | UNQ2963   | 4365 | 15.556 | 5.416  |
| 50077 K02 | M-019286- germinal ce  | 257144 | GCET2     | 5086 | 16.103 | 5.963  |
| 50077 K04 | M-009130- Rho GTPas    | 257106 | ARHGAP30  | 1828 | 7.2757 | 2.8643 |
| 50077 K05 | M-015722- zinc finger  | 255403 | ZNF718    | 2078 | 9.8171 | 0.3229 |
| 50077 K06 | M-015964- chromoson    | 257103 | C21orf86  | 4145 | 9.6984 | 0.4416 |
| 50077 K07 | M-018016- RasGEF dor   | 255426 | RASGEF1C  | 1212 | 9.1584 | 0.9816 |
| 50077 K08 | M-018347- zinc finger  | 257101 | ZNF683    | 4916 | 13.954 | 3.814  |
| 50077 K09 | M-025119- IBR domair   | 255488 | IBRDC2    | 843  | 11.388 | 1.248  |
| 50077 K10 | M-007166- phosphatid   | 257068 | PLCXD2    | 2439 | 12.71  | 2.57   |
| 50077 K11 | M-016104- ELMO/CED     | 255520 | ELMOD2    | 1850 | 4.9189 | 5.2211 |
| 50077 K12 | M-015570- transmemk    | 257062 | TMEM146   | 3320 | 16.777 | 6.637  |
| 50077 K13 | M-017525- histone clu  | 255626 | HIST1H2BA | 1518 | 7.7075 | 2.4325 |
| 50077 K14 | M-015569- D-2-hydrox   | 257054 | D2HGDH    | 2852 | 14.481 | 4.341  |
| 50077 K15 | M-018815- collagen, ty | 255631 | COL24A1   | 2572 | 7.5039 | 2.6361 |
| 50077 K16 | M-018349- chromoson    | 257044 | C1orf101  | 4924 | 9.4029 | 0.7371 |
| 50077 K17 | M-022143- hypothetical | 255654 | LOC255654 | 2216 | 8.7996 | 1.3404 |
| 50077 K18 | M-017706- FERM dom     | 257019 | FRMD3     | 5591 | 12.645 | 2.505  |
| 50077 K19 | M-032038- zona pelluc  | 22917  | ZP1       | 1632 | 12.194 | 2.054  |
| 50077 K20 | M-015725- placenta-sp  | 257000 | PLAC2     | 3396 | 20.671 | 10.531 |
| 50077 K21 | M-005989- proprotein   | 255738 | PCSK9     | 1395 | 5.5197 | 4.6203 |
| 50077 K23 | M-027204- nephronec    | 255743 | NPNT      | 3202 | 6.3086 | 3.8314 |
| 50077 L02 | M-018257- transmemk    | 283673 | TMEM84    | 1836 | 2.5054 | 7.6346 |
| 50077 L04 | M-030407- hypothetical | 283663 | LOC283663 | 1464 | 14.208 | 4.068  |
| 50077 L05 | M-030069- hypothetical | 283331 | LOC283331 | 2280 | 16.36  | 6.22   |
| 50077 L06 | M-022248- protogenin   | 283659 | PRTG      | 2791 | 11.143 | 1.003  |
| 50077 L07 | M-030070- hypothetical | 283332 | LOC283332 | 3962 | 15.573 | 5.433  |
| 50077 L08 | M-031913- solute carri | 283652 | SLC24A5   | 395  | 9.3671 | 0.7729 |
| 50077 L09 | M-018472- Ras associa  | 283349 | RASSF3    | 3649 | 18.827 | 8.687  |
| 50077 L10 | M-018259- chromoson    | 283651 | C15orf21  | 1665 | 7.6276 | 2.5124 |
| 50077 L11 | M-018273- beta-1,4-N   | 283358 | B4GALNT3  | 3314 | 10.229 | 0.089  |
| 50077 L12 | M-018263- chromoson    | 283643 | C14orf80  | 2108 | 23.292 | 13.152 |
| 50077 L13 | M-030080- ankyrin rep  | 283373 | ANKRD52   | 4299 | 20.865 | 10.725 |
| 50077 L14 | M-022012- KIAA0284     | 283638 | KIAA0284  | 2482 | 9.6293 | 0.5107 |
| 50077 L15 | M-007364- solute carri | 283375 | SLC39A5   | 2182 | 5.4079 | 4.7321 |
| 50077 L16 | M-018433- chromoson    | 283635 | C14orf24  | 2171 | 5.7577 | 4.3823 |



|           |                        |                  |      |        |        |
|-----------|------------------------|------------------|------|--------|--------|
| 50077 L17 | M-027007- SPRY doma    | 283377 SPRYD4    | 5615 | 16.26  | 6.12   |
| 50077 L18 | M-007317- chromoson    | 283600 C14orf68  | 1426 | 17.812 | 7.672  |
| 50077 L19 | M-027093- G protein-c  | 283383 GPR133    | 5766 | 18.176 | 8.036  |
| 50077 L20 | M-018954- chromoson    | 283598 C14orf177 | 1588 | 29.03  | 18.89  |
| 50077 L21 | M-017746- MORN repr    | 283385 MORN3     | 5436 | 20.309 | 10.169 |
| 50077 L23 | M-030089- hypothetic   | 283392 LOC283392 | 5096 | 15.463 | 5.323  |
| 50077 M02 | M-018248- serine inco  | 256987 SERINC5   | 4491 | 7.0808 | 3.0592 |
| 50077 M04 | M-015568- Sad1 and U   | 256979 SUNC1     | 4332 | 18.329 | 8.189  |
| 50077 M05 | M-015945- hypothetic   | 255758 MGC33212  | 2430 | 11.77  | 1.63   |
| 50077 M06 | M-016261- chromoson    | 256957 C17orf66  | 4786 | 7.9398 | 2.2002 |
| 50077 M07 | M-018354- chromoson    | 255762 C16orf65  | 1344 | 10.789 | 0.649  |
| 50077 M08 | M-031728- ankyrin rep  | 256949 ANKRD47   | 5383 | 14.713 | 4.573  |
| 50077 M09 | M-023534- chromoson    | 255798 C3orf43   | 3534 | 9.7906 | 0.3494 |
| 50077 M10 | M-015724- chromoson    | 256815 C10orf67  | 4291 | 11.279 | 1.139  |
| 50077 M11 | M-023531- succinate d  | 255812 SDHALP1   | 4911 | 21.482 | 11.342 |
| 50077 M12 | M-019385- WD repeat    | 256764 WDR72     | 1471 | 10.945 | 0.805  |
| 50077 M13 | M-018790- transmemk    | 255919 TMEM188   | 2299 | 17.747 | 7.607  |
| 50077 M14 | M-016260- MAP7 dom     | 256714 MAP7D2    | 3665 | 13.37  | 3.23   |
| 50077 M15 | M-016105- synaptotag   | 255928 SYT14     | 5475 | 24.986 | 14.846 |
| 50077 M16 | M-015768- MAM dom.     | 256691 MAMDC2    | 2259 | 13.546 | 3.406  |
| 50077 M17 | M-017990- PAN3 poly/   | 255967 PAN3      | 3689 | 7.807  | 2.333  |
| 50077 M18 | M-022211- nuclear prc  | 256646 NUT       | 4570 | 24.814 | 14.674 |
| 50077 M19 | M-024511- ankyrin rep  | 256006 ANKRD31   | 3210 | 9.19   | 0.95   |
| 50077 M20 | M-024917- chromoson    | 256643 CXorf23   | 4692 | 15.793 | 5.653  |
| 50077 M21 | M-030044- hypothetic   | 256021 LOC256021 | 1190 | 15.042 | 4.902  |
| 50077 M23 | M-016106- zinc finger  | 256051 ZNF549    | 928  | 8.6207 | 1.5193 |
| 50077 N02 | M-030321- chromoson    | 283592 C14orf86  | 1776 | 3.7162 | 6.4238 |
| 50077 N04 | M-021989- hypothetic   | 283587 LOC283587 | 1868 | 3.7473 | 6.3927 |
| 50077 N05 | M-030071- hypothetic   | 283400 LOC283400 | 5769 | 11.752 | 1.612  |
| 50077 N06 | M-030316- hypothetic   | 283585 LOC283585 | 2746 | 6.8463 | 3.2937 |
| 50077 N07 | M-026955- hypothetic   | 283403 LOC283403 | 4773 | 13.032 | 2.892  |
| 50077 N08 | M-017928- chromoson    | 283579 C14orf178 | 2251 | 8.4851 | 1.6549 |
| 50077 N09 | M-018068- chromoson    | 283416 C12orf61  | 5116 | 18.471 | 8.331  |
| 50077 N10 | M-021982- transmemk    | 283578 TMED8     | 3003 | 15.951 | 5.811  |
| 50077 N11 | M-018272- dpy-19-like  | 283417 DPY19L2   | 4795 | 14.557 | 4.417  |
| 50077 N12 | M-022054- prospero h   | 283571 PROX2     | 1824 | 8.8268 | 1.3132 |
| 50077 N13 | M-032040- C-type lecti | 283420 CLEC9A    | 4869 | 14.13  | 3.99   |
| 50077 N14 | M-005743- G protein-c  | 283554 GPR137C   | 3590 | 12.786 | 2.646  |
| 50077 N15 | M-018912- chromoson    | 283422 C12orf36  | 5842 | 18.726 | 8.586  |
| 50077 N16 | M-030289- hypothetic   | 283551 LOC283551 | 1672 | 5.9809 | 4.1591 |
| 50077 N17 | M-017927- growth arr   | 283431 GAS2L3    | 4484 | 19.67  | 9.53   |
| 50077 N18 | M-030287- hypothetic   | 283547 LOC283547 | 2188 | 9.6435 | 0.4965 |
| 50077 N19 | M-030051- hypothetic   | 283432 LOC283432 | 5185 | 21.311 | 11.171 |
| 50077 N20 | M-018594- solute carri | 283537 SLC46A3   | 2140 | 11.215 | 1.075  |
| 50077 N21 | M-032183- hypothetic   | 283439 LOC283439 | 5117 | 23.568 | 13.428 |
| 50077 N23 | M-018271- myosin IH    | 283446 MYO1H     | 2104 | 10.456 | 0.316  |
| 50077 O02 | M-015723- LysM, puta   | 256586 LYSMD2    | 4283 | 6.9344 | 3.2056 |

|           |                        |                  |         |         |          |
|-----------|------------------------|------------------|---------|---------|----------|
| 50077 O04 | M-017916- transcriptic | 256536 TCERG1L   | 2470    | 8.9879  | 1.1521   |
| 50077 O05 | M-015765- hypothetic   | 256076 FLJ35880  | 2621    | 6.1045  | 4.0355   |
| 50077 O06 | M-015767- transmemk    | 256472 TMEM151   | 2560    | 4.0234  | 6.1166   |
| 50077 O07 | M-015946- hypothetic   | 256130 MGC42090  | 2601    | 9.3426  | 0.7974   |
| 50077 O08 | M-007362- major facili | 256471 MFSD8     | 2944    | 5.3329  | 4.8071   |
| 50077 O09 | M-029449- hemicentin   | 256158 HMCN2     | 804     | 9.5771  | 0.5629   |
| 50077 O10 | M-015456- ST6 (alpha-  | 256435 ST6GALNA4 | 4759    | 14.604  | 4.464    |
| 50077 O11 | M-032039- similar to S | 256227 MGC87042  | 1484    | 9.9057  | 0.2343   |
| 50077 O12 | M-021430- sex comb c   | 256380 SCML4     | 2210    | 11.131  | 0.991    |
| 50077 O13 | M-029531- coactivator  | 256280 CARM1L    | 1554    | 10.811  | 0.671    |
| 50077 O14 | M-016258- chromosom    | 256369 C14orf48  | 4676    | 14.115  | 3.975    |
| 50077 O15 | M-009076- nudix (nucl  | 256281 NUDT14    | 3052    | 11.861  | 1.721    |
| 50077 O16 | M-015766- echinoderr   | 256364 EML3      | 2466    | 10.462  | 0.322    |
| 50077 O17 | M-018469- pancreas s   | 256297 PTF1A     | 1678    | 8.2241  | 1.9159   |
| 50077 O18 | M-006816- glycerol kir | 256356 GK5       | 1855    | 26.954  | 16.814   |
| 50077 O19 | M-016632- transcript e | 256302 MGC33894  | 1703    | 11.509  | 1.369    |
| 50077 O20 | M-028819- ribosomal p  | 256355 MGC27348  | 2117    | 9.1167  | 1.0233   |
| 50077 O21 | M-015947- coiled-coil  | 256309 CCDC110   | 1895    | 20.369  | 10.229   |
| 50077 O23 | M-018350- chromosom    | 256329 C11orf35  | 1030    | 22.136  | 11.996   |
| 50077 P02 | M-018264- potassium    | 283518 KCNRG     | 1550    | 15.032  | 4.892    |
| 50077 P04 | M-032242- similar to s | 283514 LOC283514 | 1019    | 10.893  | 0.753    |
| 50077 P05 | M-018270- chromosom    | 283450 C12orf51  | 4188    | 15.521  | 5.381    |
| 50077 P06 | M-018266- hypothetic   | 283492 FLJ25694  | 2339    | 6.4558  | 3.6842   |
| 50077 P07 | M-018269- chromosom    | 283461 C12orf40  | 4872    | 12.931  | 2.791    |
| 50077 P08 | M-030231- olfactory r  | 283491 OR7E156P  | 2807    | 9.4051  | 0.7349   |
| 50077 P09 | M-026987- glycosyltra  | 283464 GLT8D3    | 4805    | 16.857  | 6.717    |
| 50077 P10 | M-021601- chromosom    | 283489 C13orf8   | 3361    | 16.067  | 5.927    |
| 50077 P11 | M-016318- cutaneous    | 64693 CTAGE1     | 5826    | 17.92   | 7.78     |
| 50077 P12 | M-018213- chromosom    | 283487 C13orf29  | 2990    | 8.3612  | 1.7788   |
| 50077 P13 | M-015666- putative pr  | 282706 G30       | 3520    | 17.813  | 7.673    |
| 50077 P14 | M-030190- hypothetic   | 283483 LOC283483 | 1856    | 3.3944  | 6.7456   |
| 50077 P15 | M-019031- late cornifi | 254910 LCE5A     | 4807    | 15.29   | 5.15     |
| 50077 P16 | M-030189- hypothetic   | 283480 LOC283480 | 1790    | 12.626  | 2.486    |
| 50077 P17 | M-017882- synovial sa  | 280659 SSX8      | 1898    | 10.959  | 0.819    |
| 50077 P18 | M-005948- transmemk    | 283471 TMPRSS12  | 3689    | 10.735  | 0.595    |
| 50077 P19 | M-016426- neuropepti   | 256933 NPB       | 3752    | 13.753  | 3.613    |
| 50077 P20 | M-008784- hypothetic   | 283470 FLJ34278  | 1872    | 13.088  | 2.948    |
| 50077 P21 | M-031928- transmemk    | 388730 TMEM81    | 1721    | 8.4834  | 1.6566   |
| 50077 P23 | M-032078- FLJ45717 p   | 388759 FLJ45717  | 2334    | 5.9126  | 4.2274   |
|           |                        | MAD              | 2275    | 10.1395 | 3.1553   |
|           |                        | MAD3             |         |         | 9.4659   |
|           |                        | MADc             |         |         | 4.669844 |
| 50077 C22 |                        |                  | 1488    | 38.239  |          |
| 50077 D22 |                        |                  | 2258    | 21.391  |          |
| 50077 E22 |                        |                  | 1637    | 26.634  |          |
| 50077 F22 |                        |                  | 3696    | 28.95   |          |
|           |                        | mn               | 2269.75 | 28.8035 |          |

|           |     |          |          |          |
|-----------|-----|----------|----------|----------|
|           |     | sd       | 1007.61  | 7.040407 |
| 50077 G22 |     |          | 472      | 6.5678   |
| 50077 H22 |     |          | 688      | 4.6512   |
| 50077 I22 | 370 | 10       |          |          |
| 50077 J22 |     |          | 899      | 6.6741   |
|           |     | mn       | 686.3333 | 5.964367 |
|           |     | sd       | 213.5049 | 1.138477 |
|           |     | 3psSD    |          | 21.12122 |
|           |     | 3ngSD    |          | 3.415431 |
|           |     | SumSD    |          | 24.53665 |
|           |     | MeanDf   |          | 22.83913 |
|           |     | SumovrMn |          | 1.074325 |
|           |     | 1minus   |          | -0.07433 |

|           |                                    |      |           |      |        |
|-----------|------------------------------------|------|-----------|------|--------|
| 50077 G03 | M-003290- polo-like ki             | 5347 | PLK1 SMAR | 237  | 13.08  |
| 50077 H03 | M-003290- polo-like ki             | 5347 | PLK1 SMAR | 105  | 27.619 |
| 50077 I03 | D-001206-: siControl non-targetinç |      |           | 1655 | 6.8882 |
| 50077 J03 | D-001206-: siControl non-targetinç |      |           | 883  | 10.646 |
| 50077 L03 | D-001600-( siGLO RISC-free siRNA   |      |           | 3482 | 16.198 |
| 50077 K03 | D-001600-( siGLO RISC-free siRNA   |      |           | 5260 | 14.068 |

| rZ       | cell ct | % inf  | AD     | rZ       | cell ct | % inf  | AD     | rZ       |
|----------|---------|--------|--------|----------|---------|--------|--------|----------|
| -0.92414 | 870     | 8.046  | 0.946  | 0.169184 | 774     | 5.0388 | 2.6512 | -0.52345 |
| 1.112564 | 342     | 19.006 | 11.906 | 2.123607 | 508     | 15.157 | 7.467  | 1.477174 |
| 0.221956 | 545     | 18.165 | 11.065 | 1.973637 | 443     | 8.3521 | 0.6621 | 0.131675 |
| 0.519396 | 564     | 13.298 | 6.198  | 1.105738 | 1439    | 5.8374 | 1.8526 | -0.36554 |
| 0.407401 | 1052    | 4.5627 | 2.5373 | -0.45197 | 871     | 5.1665 | 2.5235 | -0.4982  |
| -0.72437 | 720     | 11.389 | 4.289  | 0.765319 | 927     | 4.8544 | 2.8356 | -0.55991 |
| 0.923693 | 804     | 7.9602 | 0.8602 | 0.153884 | 974     | 4.8255 | 2.8645 | -0.56562 |
| -0.45376 | 1124    | 11.388 | 4.288  | 0.76514  | 363     | 9.9174 | 2.2274 | 0.441174 |
| -0.81123 | 545     | 11.376 | 4.276  | 0.763001 | 693     | 8.0808 | 0.3908 | 0.078032 |
| -0.65221 | 599     | 8.8481 | 1.7481 | 0.312217 | 495     | 9.0909 | 1.4009 | 0.277754 |
| 0.993074 | 365     | 9.589  | 2.489  | 0.444337 | 275     | 13.091 | 5.401  | 1.068674 |
| 2.738314 | 299     | 31.773 | 24.673 | 4.40026  | 431     | 4.6404 | 3.0496 | -0.60222 |
| 1.591167 | 278     | 24.82  | 17.72  | 3.160378 | 539     | 8.7199 | 1.0299 | 0.204398 |
| 1.085368 | 863     | 10.429 | 3.329  | 0.594128 | 854     | 11.827 | 4.137  | 0.818749 |
| 2.358644 | 329     | 13.678 | 6.578  | 1.173501 | 854     | 2.3419 | 5.3481 | -1.05669 |
| 1.338053 | 405     | 15.062 | 7.962  | 1.4203   | 1126    | 12.167 | 4.477  | 0.885976 |
| 0.634604 | 830     | 6.3855 | 0.7145 | -0.12692 | 598     | 13.88  | 6.19   | 1.224679 |
| 1.639776 | 493     | 11.765 | 4.665  | 0.832368 | 628     | 10.35  | 2.66   | 0.52671  |
| 0.139512 | 613     | 13.051 | 5.951  | 1.061692 | 369     | 21.409 | 13.719 | 2.71335  |
| -0.64169 | 312     | 13.141 | 6.041  | 1.077741 | 425     | 13.176 | 5.486  | 1.08548  |
| -0.32656 | 1394    | 0.7891 | 6.3109 | -1.12489 | 1307    | 3.137  | 4.553  | -0.89948 |
| 0.077412 | 1063    | 4.9859 | 2.1141 | -0.3765  | 1121    | 3.2114 | 4.4786 | -0.88477 |
| -0.34297 | 1369    | 2.4836 | 4.6164 | -0.82272 | 2206    | 7.5703 | 0.1197 | -0.02291 |
| -1.11079 | 1343    | 2.755  | 4.345  | -0.77432 | 1736    | 4.3203 | 3.3697 | -0.66551 |
| 0.072915 | 1166    | 4.3739 | 2.7261 | -0.48564 | 1885    | 3.9788 | 3.7112 | -0.73304 |
| 0.057497 | 765     | 2.4837 | 4.6163 | -0.8227  | 948     | 3.7975 | 3.8925 | -0.76888 |
| 0.014026 | 1109    | 4.5086 | 2.5914 | -0.46162 | 1613    | 3.7198 | 3.9702 | -0.78425 |
| -0.73193 | 1452    | 1.7218 | 5.3782 | -0.95857 | 2687    | 4.5032 | 3.1868 | -0.62935 |
| 1.138689 | 568     | 11.092 | 3.992  | 0.712357 | 378     | 17.46  | 9.77   | 1.932534 |
| -0.67469 | 824     | 2.7913 | 4.3087 | -0.76785 | 419     | 7.8759 | 0.1859 | 0.037518 |
| -0.62863 | 1205    | 1.0788 | 6.0212 | -1.07323 | 1077    | 5.1068 | 2.5832 | -0.51    |
| -0.43464 | 1513    | 1.9828 | 5.1172 | -0.91203 | 1757    | 4.667  | 3.023  | -0.59696 |
| 0.83975  | 1224    | 5.3105 | 1.7895 | -0.31862 | 1439    | 8.6866 | 0.9966 | 0.197814 |
| -0.74367 | 1515    | 2.2442 | 4.8558 | -0.86541 | 2401    | 2.7489 | 4.9411 | -0.97622 |
| -0.66925 | 830     | 1.6867 | 5.4133 | -0.96483 | 1586    | 5.1072 | 2.5828 | -0.50992 |
| -1.46793 | 665     | 3.4586 | 3.6414 | -0.64886 | 684     | 5.2632 | 2.4268 | -0.47908 |
| -0.15988 | 330     | 3.0303 | 4.0697 | -0.72523 | 369     | 14.905 | 7.215  | 1.427347 |
| -0.25003 | 1024    | 7.1289 | 0.0289 | 0.005644 | 2167    | 10.383 | 2.693  | 0.533235 |
| -1.21993 | 834     | 2.6379 | 4.4621 | -0.79521 | 1164    | 11.254 | 3.564  | 0.705453 |
| -1.55273 | 2237    | 2.4586 | 4.6414 | -0.82718 | 1749    | 6.0034 | 1.6866 | -0.33272 |
| -0.73602 | 3043    | 2.2018 | 4.8982 | -0.87297 | 3064    | 3.9817 | 3.7083 | -0.73246 |
| 0.07163  | 1918    | 8.6548 | 1.5548 | 0.277747 | 2338    | 3.9778 | 3.7122 | -0.73323 |
| -1.08421 | 1684    | 5.6413 | 1.4587 | -0.25963 | 1976    | 4.9595 | 2.7305 | -0.53913 |
| 0.157072 | 1779    | 6.2395 | 0.8605 | -0.15296 | 4117    | 5.4166 | 2.2734 | -0.44875 |
| -1.15768 | 1441    | 7.2172 | 0.1172 | 0.02139  | 1906    | 5.6139 | 2.0761 | -0.40974 |
| 1.851347 | 366     | 27.596 | 20.496 | 3.655404 | 740     | 12.432 | 4.742  | 0.938373 |

|          |      |        |        |          |      |        |        |          |
|----------|------|--------|--------|----------|------|--------|--------|----------|
| -1.12884 | 1037 | 7.9074 | 0.8074 | 0.144469 | 1767 | 6.0555 | 1.6345 | -0.32242 |
| -0.12748 | 532  | 13.534 | 6.434  | 1.147822 | 1045 | 4.4019 | 3.2881 | -0.64938 |
| -0.87817 | 1987 | 7.2471 | 0.1471 | 0.026722 | 2336 | 2.6969 | 4.9931 | -0.9865  |
| -1.31625 | 1402 | 12.197 | 5.097  | 0.909404 | 1633 | 16.534 | 8.844  | 1.749441 |
| 0.441449 | 444  | 14.64  | 7.54   | 1.345048 | 525  | 10.857 | 3.167  | 0.626956 |
| 1.081514 | 1279 | 15.637 | 8.537  | 1.522836 | 1944 | 5.1955 | 2.4945 | -0.49246 |
| 0.531388 | 1402 | 10.913 | 3.813  | 0.680437 | 1600 | 5.1875 | 2.5025 | -0.49405 |
| 0.524107 | 1463 | 10.731 | 3.631  | 0.647982 | 2070 | 2.8986 | 4.7914 | -0.94662 |
| -0.02752 | 799  | 15.895 | 8.795  | 1.568843 | 1357 | 5.4532 | 2.2368 | -0.44151 |
| 1.121344 | 959  | 17.205 | 10.105 | 1.802447 | 1628 | 6.2039 | 1.4861 | -0.29308 |
| 0.159855 | 1625 | 10.092 | 2.992  | 0.534034 | 1515 | 5.9406 | 1.7494 | -0.34514 |
| 1.514719 | 3309 | 16.893 | 9.793  | 1.74681  | 3517 | 13.904 | 6.214  | 1.229424 |
| -0.55841 | 1929 | 6.3245 | 0.7755 | -0.1378  | 2584 | 3.9087 | 3.7813 | -0.7469  |
| 1.656051 | 4221 | 8.9078 | 1.8078 | 0.322863 | 4398 | 13.256 | 5.566  | 1.101298 |
| -1.30032 | 1546 | 1.3583 | 5.7417 | -1.02339 | 1623 | 4.5595 | 3.1305 | -0.61822 |
| 0.159641 | 976  | 4.7131 | 2.3869 | -0.42515 | 1595 | 6.0188 | 1.6712 | -0.32968 |
| 0.454298 | 1367 | 8.4857 | 1.3857 | 0.247593 | 1986 | 8.2075 | 0.5175 | 0.103084 |
| -0.22502 | 3147 | 6.3553 | 0.7447 | -0.13231 | 3902 | 5.1256 | 2.5644 | -0.50628 |
| 0.556871 | 3957 | 6.0399 | 1.0601 | -0.18855 | 4293 | 6.9881 | 0.7019 | -0.13802 |
| -0.77898 | 716  | 8.3799 | 1.2799 | 0.228726 | 801  | 11.361 | 3.671  | 0.72661  |
| -1.06239 | 770  | 6.2338 | 0.8662 | -0.15397 | 1273 | 3.9277 | 3.7623 | -0.74314 |
| -0.02345 | 1513 | 12.227 | 5.127  | 0.914754 | 2357 | 6.7883 | 0.9017 | -0.17753 |
| -0.29545 | 2622 | 8.3905 | 1.2905 | 0.230617 | 3184 | 5.1508 | 2.5392 | -0.5013  |
| -1.2058  | 1049 | 5.0524 | 2.0476 | -0.36464 | 1074 | 4.0968 | 3.5932 | -0.7097  |
| -1.48506 | 1681 | 4.878  | 2.222  | -0.39574 | 1421 | 3.3075 | 4.3825 | -0.86577 |
| -0.26635 | 1116 | 6.362  | 0.738  | -0.13111 | 1281 | 2.498  | 5.192  | -1.02583 |
| -0.32999 | 2808 | 13.212 | 6.112  | 1.090402 | 3166 | 7.5174 | 0.1726 | -0.03337 |
| -1.3839  | 1171 | 5.38   | 1.72   | -0.30623 | 1642 | 1.6443 | 6.0457 | -1.19462 |
| -0.15041 | 1991 | 12.104 | 5.004  | 0.89282  | 3223 | 9.4012 | 1.7112 | 0.339108 |
| -0.78365 | 1520 | 12.961 | 5.861  | 1.045643 | 2059 | 2.0398 | 5.6502 | -1.11642 |
| -0.94059 | 2497 | 9.6115 | 2.5115 | 0.448349 | 3515 | 3.5277 | 4.1623 | -0.82223 |
| -1.22081 | 1986 | 6.7976 | 0.3024 | -0.05343 | 1566 | 3.1928 | 4.4972 | -0.88845 |
| 0.2408   | 4923 | 24.782 | 17.682 | 3.153602 | 5627 | 12.049 | 4.359  | 0.862644 |
| -1.79625 | 1314 | 5.5556 | 1.5444 | -0.27491 | 767  | 5.4759 | 2.2141 | -0.43702 |
| -0.24949 | 1194 | 1.1725 | 5.9275 | -1.05652 | 1944 | 5.0926 | 2.5974 | -0.51281 |
| -1.54652 | 733  | 1.2278 | 5.8722 | -1.04666 | 911  | 5.2689 | 2.4211 | -0.47795 |
| -0.1175  | 2284 | 3.0648 | 4.0352 | -0.71908 | 3443 | 6.0122 | 1.6778 | -0.33098 |
| 0.089189 | 2367 | 6.8019 | 0.2981 | -0.05267 | 3479 | 6.065  | 1.625  | -0.32054 |
| 0.096256 | 695  | 1.8705 | 5.2295 | -0.93205 | 1350 | 7.7778 | 0.0878 | 0.018121 |
| 0.339091 | 3040 | 9.2763 | 2.1763 | 0.388575 | 3691 | 8.1279 | 0.4379 | 0.087345 |
| -0.60576 | 744  | 2.957  | 4.143  | -0.7383  | 779  | 4.4929 | 3.1971 | -0.63139 |
| -0.01403 | 1981 | 11.257 | 4.157  | 0.74178  | 3270 | 5.9021 | 1.7879 | -0.35275 |
| 1.123271 | 658  | 13.678 | 6.578  | 1.173501 | 1854 | 10.68  | 2.99   | 0.591959 |
| 0.718546 | 2146 | 10.718 | 3.618  | 0.645664 | 1995 | 3.2581 | 4.4319 | -0.87554 |
| -0.6669  | 275  | 4      | 3.1    | -0.55231 | 250  | 9.6    | 1.91   | 0.378416 |
| 0.301616 | 3706 | 23.314 | 16.214 | 2.891823 | 4613 | 10.514 | 2.824  | 0.559137 |
| -0.45635 | 809  | 5.686  | 1.414  | -0.25166 | 1069 | 8.232  | 0.542  | 0.107928 |

|          |      |          |          |          |      |         |         |          |
|----------|------|----------|----------|----------|------|---------|---------|----------|
| 0.566507 | 4597 | 15.967   | 8.867    | 1.581683 | 4386 | 9.8723  | 2.1823  | 0.432256 |
| -1.01652 | 661  | 4.6899   | 2.4101   | -0.42929 | 1131 | 2.6525  | 5.0375  | -0.99528 |
| 0.112959 | 1161 | 8.5271   | 1.4271   | 0.254975 | 1545 | 5.2427  | 2.4473  | -0.48313 |
| -0.1111  | 1265 | 9.4071   | 2.3071   | 0.4119   | 1257 | 3.4208  | 4.2692  | -0.84337 |
| -0.15157 | 3519 | 19.352   | 12.252   | 2.185307 | 5369 | 10.281  | 2.591   | 0.513067 |
| -1.39062 | 589  | 8.1494   | 1.0494   | 0.187623 | 1017 | 4.9164  | 2.7736  | -0.54765 |
| -1.32801 | 1887 | 8.638    | 1.538    | 0.274752 | 1009 | 5.55    | 2.14    | -0.42237 |
| -1.40489 | 2511 | 0.71685  | 6.38315  | -1.13777 | 1951 | 3.6904  | 3.9996  | -0.79006 |
| -1.28098 | 2392 | 2.2993   | 4.8007   | -0.85559 | 1862 | 7.6262  | 0.0638  | -0.01185 |
| -0.36622 | 4248 | 3.2957   | 3.8043   | -0.6779  | 3445 | 10.363  | 2.673   | 0.52928  |
| -0.63994 | 2193 | 0.091199 | 7.008801 | -1.24934 | 2616 | 6.6131  | 1.0769  | -0.21217 |
| 0.095828 | 4951 | 6.6855   | 0.4145   | -0.07342 | 5414 | 19.616  | 11.926  | 2.358829 |
| -0.42468 | 1049 | 2.9552   | 4.1448   | -0.73862 | 1132 | 12.279  | 4.589   | 0.908121 |
| -2.01103 | 1254 | 0.39872  | 6.70128  | -1.1945  | 1307 | 5.8914  | 1.7986  | -0.35487 |
| -1.59605 | 1990 | 1.2563   | 5.8437   | -1.04158 | 1907 | 4.9292  | 2.7608  | -0.54512 |
| 0.410827 | 3532 | 13.25    | 6.15     | 1.097178 | 4738 | 16.547  | 8.857   | 1.752011 |
| -0.81752 | 246  | 8.1301   | 1.0301   | 0.184181 | 601  | 17.471  | 9.781   | 1.934709 |
| -1.08351 | 605  | 4.6281   | 2.4719   | -0.44031 | 977  | 8.4954  | 0.8054  | 0.160009 |
| -1.09344 | 1217 | 2.2186   | 4.8814   | -0.86998 | 1060 | 3.3962  | 4.2938  | -0.84823 |
| -1.56515 | 2374 | 2.8222   | 4.2778   | -0.76234 | 2954 | 11.747  | 4.057   | 0.802931 |
| -1.51954 | 1046 | 3.8241   | 3.2759   | -0.58368 | 1791 | 3.6851  | 4.0049  | -0.79111 |
| -0.45633 | 4296 | 12.942   | 5.842    | 1.042255 | 5856 | 16.291  | 8.601   | 1.701394 |
| -1.46311 | 1501 | 2.0653   | 5.0347   | -0.89731 | 2395 | 2.5887  | 5.1013  | -1.00789 |
| -0.50117 | 5896 | 21.014   | 13.914   | 2.48168  | 5851 | 10.614  | 2.924   | 0.578909 |
| -1.88417 | 2047 | 3.8105   | 3.2895   | -0.5861  | 2130 | 0.75117 | 6.93883 | -1.37122 |
| -0.31873 | 4013 | 7.8993   | 0.7993   | 0.143024 | 6153 | 17.406  | 9.716   | 1.921857 |
| -2.09692 | 647  | 9.5827   | 2.4827   | 0.443213 | 376  | 1.5957  | 6.0943  | -1.20423 |
| -1.5266  | 2285 | 6.477    | 0.623    | -0.1106  | 2022 | 3.907   | 3.783   | -0.74723 |
| 1.20079  | 2048 | 23.145   | 16.045   | 2.861687 | 1262 | 9.588   | 1.898   | 0.376043 |
| 0.772724 | 625  | 20       | 12.9     | 2.30086  | 244  | 12.705  | 5.015   | 0.992352 |
| -0.47184 | 4426 | 16.064   | 8.964    | 1.59898  | 2379 | 7.9025  | 0.2125  | 0.042778 |
| 0.617044 | 231  | 40.693   | 33.593   | 5.990903 | 200  | 26      | 18.31   | 3.621106 |
| 0.398621 | 3557 | 14.76    | 7.66     | 1.366446 | 1410 | 6.7376  | 0.9524  | -0.18755 |
| 0.694991 | 4053 | 23.341   | 16.241   | 2.896638 | 2639 | 7.6923  | 0.0023  | 0.001216 |
| -1.37683 | 756  | 8.8624   | 1.7624   | 0.314767 | 444  | 4.955   | 2.735   | -0.54002 |
| -0.8329  | 1523 | 16.415   | 9.315    | 1.661571 | 1316 | 7.4468  | 0.2432  | -0.04733 |
| -0.25838 | 1109 | 12.894   | 5.794    | 1.033695 | 784  | 3.4439  | 4.2461  | -0.8388  |
| 0.72647  | 653  | 24.655   | 17.555   | 3.130955 | 400  | 8.5     | 0.81    | 0.160918 |
| 0.348513 | 1297 | 14.958   | 7.858    | 1.401754 | 1545 | 8.6731  | 0.9831  | 0.195145 |
| -1.10017 | 1633 | 9.553    | 2.453    | 0.437917 | 2000 | 3.6     | 4.09    | -0.80793 |
| 0.596058 | 1715 | 15.627   | 8.527    | 1.521053 | 1588 | 11.398  | 3.708   | 0.733925 |
| 1.111065 | 855  | 17.193   | 10.093   | 1.800307 | 480  | 10.417  | 2.727   | 0.539957 |
| -1.08139 | 2483 | 8.1353   | 1.0353   | 0.185108 | 3034 | 3.9222  | 3.7678  | -0.74423 |
| -0.95157 | 1341 | 12.081   | 4.981    | 0.888718 | 1159 | 5.3494  | 2.3406  | -0.46203 |
| -0.28521 | 2892 | 20.124   | 13.024   | 2.322972 | 2093 | 9.3645  | 1.6745  | 0.331852 |
| -1.09361 | 1300 | 11.846   | 4.746    | 0.846812 | 1709 | 7.4312  | 0.2588  | -0.05041 |
| -1.50138 | 1343 | 4.8399   | 2.2601   | -0.40254 | 858  | 3.4965  | 4.1935  | -0.8284  |

|                 |             |               |               |                 |             |               |               |                 |
|-----------------|-------------|---------------|---------------|-----------------|-------------|---------------|---------------|-----------------|
| -1.06991        | 1144        | 8.8287        | 1.7287        | 0.308758        | 873         | 3.3219        | 4.3681        | -0.86292        |
| 0.181912        | 1119        | 17.784        | 10.684        | 1.905696        | 372         | 13.441        | 5.751         | 1.137878        |
| 1.347904        | 3700        | 17.946        | 10.846        | 1.934584        | 4323        | 10.826        | 3.136         | 0.620827        |
| 0.196259        | 1234        | 8.59          | 1.49          | 0.266192        | 1093        | 6.9533        | 0.7367        | -0.1449         |
| <b>3.856553</b> | <b>2962</b> | <b>25.726</b> | <b>18.626</b> | <b>3.321939</b> | <b>2682</b> | <b>21.663</b> | <b>13.973</b> | <b>2.763572</b> |
| -0.94706        | 1382        | 17.149        | 10.049        | 1.792461        | 661         | 9.8336        | 2.1436        | 0.424605        |
| 0.758162        | 5219        | 16.938        | 9.838         | 1.754834        | 4223        | 14.492        | 6.802         | 1.345687        |
| -0.35262        | 1150        | 7.5652        | 0.4652        | 0.083446        | 782         | 6.266         | 1.424         | -0.2808         |
| -0.35832        | 1163        | 10.576        | 3.476         | 0.620342        | 1435        | 4.8084        | 2.8816        | -0.569          |
| 0.019808        | 812         | 11.946        | 4.846         | 0.864645        | 437         | 7.5515        | 0.1385        | -0.02662        |
| 0.743815        | 671         | 19.672        | 12.572        | 2.24237         | 268         | 14.179        | 6.489         | 1.283799        |
| 0.395409        | 469         | 15.139        | 8.039         | 1.434031        | 625         | 7.68          | 0.01          | -0.00122        |
| 0.517255        | 1768        | 16.007        | 8.907         | 1.588815        | 830         | 11.205        | 3.515         | 0.695765        |
| -0.82155        | 1007        | 8.0437        | 0.9437        | 0.168774        | 1244        | 8.3601        | 0.6701        | 0.133257        |
| 0.287483        | 1531        | 13.063        | 5.963         | 1.063832        | 1137        | 11.609        | 3.919         | 0.775645        |
| -0.25667        | 1478        | 11.705        | 4.605         | 0.821669        | 1024        | 7.5195        | 0.1705        | -0.03295        |
| -0.30733        | 3466        | 16.33         | 9.23          | 1.646414        | 2012        | 12.326        | 4.636         | 0.917414        |
| 0.568434        | 1928        | 18.257        | 11.157        | 1.990043        | 1723        | 6.7324        | 0.9576        | -0.18858        |
| -1.07079        | 1731        | 8.3189        | 1.2189        | 0.217849        | 1279        | 1.9547        | 5.7353        | -1.13325        |
| -1.23253        | 1362        | 9.6182        | 2.5182        | 0.449544        | 864         | 8.4491        | 0.7591        | 0.150854        |
| -0.37464        | 4957        | 4.3776        | 2.7224        | -0.48498        | 5550        | 9.9279        | 2.2379        | 0.44325         |
| 0.50098         | 5124        | 10.792        | 3.692         | 0.65886         | 4939        | 16.603        | 8.913         | 1.763084        |
| -1.02931        | 2243        | 1.9171        | 5.1829        | -0.92374        | 1647        | 9.4718        | 1.7818        | 0.353068        |
| -0.58679        | 6007        | 8.6066        | 1.5066        | 0.269152        | 4379        | 12.606        | 4.916         | 0.972777        |
| -0.54239        | 1472        | 6.25          | 0.85          | -0.15108        | 1062        | 11.676        | 3.986         | 0.788893        |
| 0.226667        | 3720        | 8.629         | 1.529         | 0.273147        | 3896        | 15.939        | 8.249         | 1.631795        |
| -1.09231        | 1149        | 1.2185        | 5.8815        | -1.04832        | 1047        | 8.1184        | 0.4284        | 0.085467        |
| 0.177415        | 1309        | 1.7571        | 5.3429        | -0.95227        | 1116        | 7.7957        | 0.1057        | 0.021661        |
| -0.43659        | 694         | 7.0605        | 0.0395        | -0.00655        | 405         | 19.753        | 12.063        | 2.385918        |
| 1.544056        | 3916        | 9.6527        | 2.5527        | 0.455696        | 4346        | 22.918        | 15.228        | 3.011717        |
| -0.5089         | 681         | 1.6153        | 5.4847        | -0.97756        | 496         | 12.097        | 4.407         | 0.872135        |
| -1.03535        | 2144        | 7.3694        | 0.2694        | 0.048531        | 2015        | 12.754        | 5.064         | 1.002041        |
| 0.779576        | 598         | 9.3645        | 2.2645        | 0.404303        | 606         | 22.277        | 14.587        | 2.884975        |
| 0.513615        | 3123        | 6.9805        | 0.1195        | -0.02082        | 4411        | 20.721        | 13.031        | 2.577315        |
| -0.44145        | 893         | 2.9115        | 4.1885        | -0.74642        | 808         | 9.5297        | 1.8397        | 0.364516        |
| -1.43806        | 3077        | 2.0799        | 5.0201        | -0.89471        | 4075        | 6.6012        | 1.0888        | -0.21452        |
| -0.09114        | 1040        | 5.6731        | 1.4269        | -0.25396        | 851         | 3.2902        | 4.3998        | -0.86919        |
| 0.458366        | 4734        | 7.9003        | 0.8003        | 0.143202        | 4613        | 17.212        | 9.522         | 1.883498        |
| -0.50107        | 2854        | 3.0834        | 4.0166        | -0.71576        | 2905        | 11.945        | 4.255         | 0.842081        |
| 0.671222        | 1113        | 7.8167        | 0.7167        | 0.128295        | 1078        | 17.904        | 10.214        | 2.020324        |
| -0.05302        | 1696        | 5.3066        | 1.7934        | -0.31931        | 2096        | 2.2424        | 5.4476        | -1.07637        |
| 0.221528        | 1344        | 4.6131        | 2.4869        | -0.44298        | 1211        | 4.7069        | 2.9831        | -0.58907        |
| 1.291371        | 5070        | 14.655        | 7.555         | 1.347722        | 4099        | 11.783        | 4.093         | 0.81005         |
| 0.082123        | 1261        | 5.0753        | 2.0247        | -0.36056        | 387         | 3.6176        | 4.0724        | -0.80445        |
| 1.961415        | 2768        | 13.295        | 6.195         | 1.105203        | 1816        | 5.6167        | 2.0733        | -0.40918        |
| 0.946605        | 883         | 12.458        | 5.358         | 0.955946        | 373         | 6.9705        | 0.7195        | -0.1415         |
| -0.43946        | 2056        | 3.356         | 3.744         | -0.66715        | 984         | 3.1504        | 4.5396        | -0.89683        |

|          |      |         |         |          |      |        |        |          |
|----------|------|---------|---------|----------|------|--------|--------|----------|
| -0.22018 | 1241 | 5.2377  | 1.8623  | -0.3316  | 601  | 4.1597 | 3.5303 | -0.69727 |
| 0.308683 | 2052 | 7.7973  | 0.6973  | 0.124835 | 999  | 2.8028 | 4.8872 | -0.96556 |
| -0.67645 | 1707 | 5.7411  | 1.3589  | -0.24183 | 946  | 2.1142 | 5.5758 | -1.10171 |
| 1.226272 | 4613 | 14.979  | 7.879   | 1.405499 | 3891 | 10.846 | 3.156  | 0.624781 |
| -0.57957 | 1320 | 10.985  | 3.885   | 0.693276 | 985  | 3.6548 | 4.0352 | -0.7971  |
| 0.31682  | 4594 | 12.495  | 5.395   | 0.962544 | 4096 | 11.768 | 4.078  | 0.807084 |
| 0.548734 | 2233 | 12.091  | 4.991   | 0.890502 | 1260 | 3.8095 | 3.8805 | -0.76651 |
| 0.255148 | 3573 | 7.2768  | 0.1768  | 0.032018 | 3113 | 8.8018 | 1.1118 | 0.220592 |
| -0.14178 | 1518 | 3.5573  | 3.5427  | -0.63126 | 991  | 4.2381 | 3.4519 | -0.68177 |
| -0.54935 | 2386 | 2.6823  | 4.4177  | -0.78729 | 1751 | 1.3706 | 6.3194 | -1.24874 |
| 1.400796 | 2473 | 10.352  | 3.252   | 0.580398 | 1134 | 10.67  | 2.98   | 0.589982 |
| 1.463968 | 3109 | 10.743  | 3.643   | 0.650122 | 2874 | 9.4294 | 1.7394 | 0.344684 |
| 1.159889 | 4291 | 10.114  | 3.014   | 0.537957 | 3993 | 10.118 | 2.428  | 0.480837 |
| 1.277023 | 5137 | 10.337  | 3.237   | 0.577723 | 5733 | 14.722 | 7.032  | 1.391163 |
| -0.61325 | 1464 | 0.61475 | 6.48525 | -1.15598 | 887  | 8.23   | 0.54   | 0.107533 |
| -0.06904 | 1864 | 3.3262  | 3.7738  | -0.67247 | 726  | 10.055 | 2.365  | 0.468381 |
| -0.09446 | 3741 | 4.5175  | 2.5825  | -0.46003 | 2941 | 5.5423 | 2.1477 | -0.42389 |
| -0.21009 | 619  | 3.8772  | 3.2228  | -0.57421 | 452  | 19.469 | 11.779 | 2.329764 |
| 0.816837 | 3717 | 9.8197  | 2.7197  | 0.485476 | 3435 | 9.8108 | 2.1208 | 0.420096 |
| 0.267354 | 337  | 14.243  | 7.143   | 1.274253 | 180  | 28.333 | 20.643 | 4.082398 |
| 0.550447 | 1721 | 5.9268  | 1.1732  | -0.20872 | 1141 | 12.007 | 4.317  | 0.85434  |
| -1.11794 | 573  | 7.5044  | 0.4044  | 0.072604 | 360  | 9.7222 | 2.0322 | 0.402578 |
| 1.421354 | 3091 | 9.9644  | 2.8644  | 0.511279 | 1926 | 12.876 | 5.186  | 1.026163 |
| -0.52079 | 591  | 15.228  | 8.128   | 1.449902 | 337  | 11.869 | 4.179  | 0.827054 |
| 0.929688 | 1229 | 12.856  | 5.756   | 1.026919 | 928  | 13.47  | 5.78   | 1.143612 |
| -0.56439 | 1523 | 10.834  | 3.734   | 0.666349 | 1217 | 8.9565 | 1.2665 | 0.25118  |
| -0.15774 | 3229 | 10.963  | 3.863   | 0.689353 | 3384 | 7.1217 | 0.5683 | -0.11161 |
| -0.28693 | 1465 | 6.4164  | 0.6836  | -0.12141 | 1246 | 10.353 | 2.663  | 0.527303 |
| 0.536528 | 4984 | 17.516  | 10.416  | 1.857905 | 4515 | 11.008 | 3.318  | 0.656813 |
| 0.43995  | 1567 | 16.847  | 9.747   | 1.738607 | 498  | 17.47  | 9.78   | 1.934512 |
| 2.255215 | 1470 | 26.735  | 19.635  | 3.501867 | 1598 | 17.146 | 9.456  | 1.870449 |
| -0.98928 | 1042 | 16.987  | 9.887   | 1.763572 | 762  | 21.129 | 13.439 | 2.657987 |
| -0.82035 | 2829 | 6.9636  | 0.1364  | -0.02383 | 2649 | 4.7188 | 2.9712 | -0.58672 |
| -1.63477 | 837  | 0.59737 | 6.50263 | -1.15908 | 1189 | 8.2422 | 0.5522 | 0.109945 |
| 0.871228 | 942  | 0.42463 | 6.67537 | -1.18988 | 947  | 13.728 | 6.038  | 1.194625 |
| 1.332057 | 1595 | 4.6395  | 2.4605  | -0.43827 | 1625 | 11.692 | 4.002  | 0.792057 |
| 0.214889 | 1648 | 2.0024  | 5.0976  | -0.90853 | 826  | 9.4431 | 1.7531 | 0.347393 |
| 1.163529 | 5391 | 13.764  | 6.664   | 1.188836 | 3426 | 12.201 | 4.511  | 0.892699 |
| -0.1654  | 457  | 0.87527 | 6.22473 | -1.10952 | 173  | 14.451 | 6.761  | 1.33758  |
| 1.860341 | 4857 | 14.742  | 7.642   | 1.363237 | 3514 | 14.57  | 6.88   | 1.361109 |
| -0.5379  | 1117 | 1.2534  | 5.8466  | -1.04209 | 645  | 6.6667 | 1.0233 | -0.20157 |
| 0.019166 | 3419 | 4.6797  | 2.4203  | -0.43111 | 2298 | 6.1358 | 1.5542 | -0.30654 |
| 2.816475 | 829  | 6.2726  | 0.8274  | -0.14705 | 722  | 8.3102 | 0.6202 | 0.12339  |
| 2.296758 | 2329 | 6.0541  | 1.0459  | -0.18602 | 4678 | 16.567 | 8.877  | 1.755966 |
| -0.10925 | 1683 | 7.4272  | 0.3272  | 0.058838 | 1585 | 9.9054 | 2.2154 | 0.438801 |
| -1.01322 | 1248 | 5.4487  | 1.6513  | -0.29397 | 1095 | 9.7717 | 2.0817 | 0.412365 |
| -0.93832 | 865  | 1.2717  | 5.8283  | -1.03883 | 950  | 9.2632 | 1.5732 | 0.311822 |



|          |      |         |         |          |      |         |         |          |
|----------|------|---------|---------|----------|------|---------|---------|----------|
| 1.310643 | 4729 | 14.845  | 7.745   | 1.381604 | 4624 | 13.906  | 6.216   | 1.22982  |
| 1.642989 | 586  | 2.901   | 4.199   | -0.74829 | 282  | 28.014  | 20.324  | 4.019324 |
| 1.720935 | 4237 | 10.668  | 3.568   | 0.636748 | 4756 | 6.3499  | 1.3401  | -0.26421 |
| 4.04521  | 722  | 6.2327  | 0.8673  | -0.15417 | 782  | 28.517  | 20.827  | 4.118779 |
| 2.177696 | 4905 | 12.457  | 5.357   | 0.955768 | 4958 | 13.493  | 5.803   | 1.148159 |
| 1.139974 | 4187 | 9.3384  | 2.2384  | 0.399649 | 4974 | 9.6301  | 1.9401  | 0.384367 |
| -0.65499 | 3606 | 2.5513  | 4.5487  | -0.81065 | 4238 | 9.4148  | 1.7248  | 0.341797 |
| 1.753699 | 2694 | 7.9807  | 0.8807  | 0.15754  | 3076 | 18.921  | 11.231  | 2.22141  |
| 0.349155 | 1572 | 1.4631  | 5.6369  | -1.0047  | 819  | 4.2735  | 3.4165  | -0.67477 |
| -0.47104 | 2745 | 1.6029  | 5.4971  | -0.97977 | 2771 | 3.8614  | 3.8286  | -0.75625 |
| 0.139084 | 960  | 1.0417  | 6.0583  | -1.07985 | 473  | 4.2283  | 3.4617  | -0.6837  |
| 0.979369 | 4007 | 7.0377  | 0.0623  | -0.01062 | 3985 | 12.472  | 4.782   | 0.946282 |
| -0.07471 | 1694 | 2.8335  | 4.2665  | -0.76033 | 1058 | 3.3081  | 4.3819  | -0.86565 |
| 0.244012 | 3625 | 4.5241  | 2.5759  | -0.45885 | 2597 | 4.5437  | 3.1463  | -0.62134 |
| 2.428882 | 3710 | 7.655   | 0.555   | 0.09946  | 3011 | 12.587  | 4.897   | 0.96902  |
| 0.17249  | 1215 | 2.3868  | 4.7132  | -0.83998 | 1190 | 1.1765  | 6.5135  | -1.28712 |
| 1.629069 | 1164 | 4.9828  | 2.1172  | -0.37706 | 1323 | 7.3318  | 0.3582  | -0.07006 |
| 0.691779 | 3095 | 7.2698  | 0.1698  | 0.03077  | 3015 | 4.5108  | 3.1792  | -0.62785 |
| 3.179228 | 4995 | 13.594  | 6.494   | 1.158522 | 3837 | 7.975   | 0.285   | 0.057113 |
| 0.729468 | 2226 | 8.3558  | 1.2558  | 0.224429 | 1697 | 4.1839  | 3.5061  | -0.69248 |
| -0.49948 | 2613 | 1.99    | 5.11    | -0.91074 | 1787 | 2.0145  | 5.6755  | -1.12143 |
| 3.142396 | 3918 | 11.383  | 4.283   | 0.764249 | 4674 | 6.3543  | 1.3357  | -0.26334 |
| -0.20333 | 1962 | 8.5117  | 1.4117  | 0.252229 | 1764 | 0.96372 | 6.72628 | -1.32919 |
| 1.21064  | 4558 | 10.399  | 3.299   | 0.588779 | 4779 | 8.3072  | 0.6172  | 0.122797 |
| 1.049821 | 810  | 4.1975  | 2.9025  | -0.51709 | 517  | 3.4816  | 4.2084  | -0.83134 |
| -0.32524 | 766  | 8.4856  | 1.3856  | 0.247575 | 1691 | 4.3761  | 3.3139  | -0.65448 |
| -1.37548 | 1068 | 0.74906 | 6.35094 | -1.13203 | 2160 | 3.1481  | 4.5419  | -0.89729 |
| -1.36883 | 1207 | 1.4085  | 5.6915  | -1.01444 | 1381 | 3.3309  | 4.3591  | -0.86114 |
| 0.345301 | 3848 | 7.7703  | 0.6703  | 0.12002  | 5002 | 9.4362  | 1.7462  | 0.346029 |
| -0.70521 | 1211 | 1.8167  | 5.2833  | -0.94164 | 1468 | 3.7466  | 3.9434  | -0.77895 |
| 0.6194   | 3656 | 6.7834  | 0.3166  | -0.05597 | 3386 | 10.425  | 2.735   | 0.541539 |
| -0.35427 | 1007 | 2.1847  | 4.9153  | -0.87602 | 837  | 0.4779  | 7.2121  | -1.42525 |
| 1.784107 | 3530 | 5.864   | 1.236   | -0.21992 | 3562 | 8.0292  | 0.3392  | 0.06783  |
| 1.244474 | 2569 | 8.5636  | 1.4636  | 0.261484 | 1828 | 3.2823  | 4.4077  | -0.87075 |
| 0.945963 | 3142 | 7.0656  | 0.0344  | -0.00564 | 3708 | 8.1985  | 0.5085  | 0.101304 |
| -0.2811  | 1102 | 5.1724  | 1.9276  | -0.34325 | 1179 | 0.67854 | 7.01146 | -1.38558 |
| 0.854525 | 3155 | 5.103   | 1.997   | -0.35562 | 3120 | 5.0641  | 2.6259  | -0.51844 |
| 0.566721 | 1547 | 6.2702  | 0.8298  | -0.14748 | 1082 | 3.9741  | 3.7159  | -0.73396 |
| 1.838712 | 4647 | 6.8001  | 0.2999  | -0.05299 | 4321 | 8.8637  | 1.1737  | 0.232831 |
| -0.89052 | 1763 | 1.418   | 5.682   | -1.01274 | 497  | 1.2072  | 6.4828  | -1.28105 |
| 2.04086  | 4008 | 13.473  | 6.373   | 1.136944 | 3918 | 16.794  | 9.104   | 1.800849 |
| -0.10621 | 1518 | 5.4018  | 1.6982  | -0.30234 | 907  | 0.77178 | 6.91822 | -1.36714 |
| 2.392264 | 5344 | 10.741  | 3.641   | 0.649765 | 3439 | 6.3391  | 1.3509  | -0.26635 |
| 0.230307 | 1448 | 4.0055  | 3.0945  | -0.55133 | 997  | 3.009   | 4.681   | -0.92479 |
| 2.875578 | 5032 | 9.8768  | 2.7768  | 0.495658 | 3948 | 7.1175  | 0.5725  | -0.11244 |
| 0.067775 | 1368 | 3.655   | 3.445   | -0.61383 | 1676 | 3.2816  | 4.4084  | -0.87089 |
| -0.68634 | 3316 | 3.7696  | 3.3304  | -0.5934  | 3505 | 14.094  | 6.404   | 1.266992 |

|          |          |         |          |          |        |         |          |          |
|----------|----------|---------|----------|----------|--------|---------|----------|----------|
| -0.2466  | 2794     | 9.8425  | 2.7425   | 0.489542 | 1245   | 11.647  | 3.957    | 0.783159 |
| -0.86405 | 1424     | 1.8258  | 5.2742   | -0.94002 | 892    | 6.278   | 1.412    | -0.27843 |
| -1.3097  | 2423     | 4.9938  | 2.1062   | -0.37509 | 884    | 5.6561  | 2.0339   | -0.40139 |
| -0.17065 | 1742     | 3.0425  | 4.0575   | -0.72306 | 688    | 4.0698  | 3.6202   | -0.71504 |
| -1.02928 | 1537     | 2.7326  | 4.3674   | -0.77832 | 526    | 10.456  | 2.766    | 0.547669 |
| -0.12043 | 1155     | 4.1558  | 2.9442   | -0.52453 | 304    | 12.829  | 5.139    | 1.01687  |
| 0.956028 | 4540     | 6.9383  | 0.1617   | -0.02834 | 2488   | 14.831  | 7.141    | 1.412715 |
| -0.05007 | 2032     | 3.7402  | 3.3598   | -0.59864 | 472    | 4.8729  | 2.8171   | -0.55625 |
| 0.21232  | 1596     | 2.4436  | 4.6564   | -0.82985 | 1707   | 13.24   | 5.55     | 1.098135 |
| 0.143795 | 833      | 3.8415  | 3.2585   | -0.58058 | 406    | 11.823  | 4.133    | 0.817959 |
| 0.851313 | 4051     | 6.0232  | 1.0768   | -0.19153 | 1470   | 8.3673  | 0.6773   | 0.13468  |
| 0.368642 | 1544     | 3.6269  | 3.4731   | -0.61884 | 1048   | 11.927  | 4.237    | 0.838522 |
| 0.06906  | 1589     | 4.2165  | 2.8835   | -0.5137  | 589    | 6.2818  | 1.4082   | -0.27768 |
| -0.41016 | 1507     | 2.787   | 4.313    | -0.76862 | 473    | 9.7252  | 2.0352   | 0.403171 |
| 3.600656 | 1355     | 6.3469  | 0.7531   | -0.1338  | 909    | 14.741  | 7.051    | 1.39492  |
| 0.293265 | 1876     | 4.4776  | 2.6224   | -0.46714 | 643    | 14.619  | 6.929    | 1.370798 |
| -0.21902 | 1623     | 4.1898  | 2.9102   | -0.51847 | 1061   | 8.4826  | 0.7926   | 0.157478 |
| 2.190544 | 1238     | 4.8465  | 2.2535   | -0.40136 | 948    | 14.451  | 6.761    | 1.33758  |
| 2.568929 | 523      | 8.0306  | 0.9306   | 0.166438 | 300    | 22.333  | 14.643   | 2.896048 |
| 1.04768  | 690      | 1.5942  | 5.5058   | -0.98132 | 1285   | 10.584  | 2.894    | 0.572977 |
| 0.161354 | 667      | 5.0975  | 2.0025   | -0.3566  | 958    | 4.2797  | 3.4103   | -0.67354 |
| 1.152394 | 3452     | 5.4171  | 1.6829   | -0.29961 | 2990   | 10.268  | 2.578    | 0.510496 |
| -0.78883 | 1725     | 1.4493  | 5.6507   | -1.00716 | 534    | 5.0562  | 2.6338   | -0.52001 |
| 0.597772 | 2923     | 11.427  | 4.327    | 0.772095 | 2250   | 9.2444  | 1.5544   | 0.308105 |
| -0.15726 | 1354     | 1.8464  | 5.2536   | -0.93635 | 792    | 4.5455  | 3.1445   | -0.62098 |
| 1.438485 | 4007     | 6.1393  | 0.9607   | -0.17082 | 3348   | 14.755  | 7.065    | 1.397688 |
| 1.269314 | 1838     | 9.2492  | 2.1492   | 0.383743 | 1389   | 8.7833  | 1.0933   | 0.216934 |
| 1.666116 | 3100     | 8.6452  | 1.5452   | 0.276035 | 2248   | 11.966  | 4.276    | 0.846233 |
| -0.38081 | 1453     | 2.0647  | 5.0353   | -0.89742 | 811    | 6.7818  | 0.9082   | -0.17881 |
| 1.643203 | 1668     | 3.2374  | 3.8626   | -0.6883  | 859    | 4.0745  | 3.6155   | -0.71411 |
| -1.4444  | 1803     | 2.6622  | 4.4378   | -0.79087 | 738    | 1.084   | 6.606    | -1.30541 |
| 1.102928 | 2231     | 4.7961  | 2.3039   | -0.41035 | 2347   | 8.4789  | 0.7889   | 0.156746 |
| 0.532459 | 1350     | 1.9259  | 5.1741   | -0.92217 | 1362   | 0.88106 | 6.80894  | -1.34554 |
| 0.175488 | 1524     | 8.3333  | 1.2333   | 0.220416 | 953    | 3.3578  | 4.3322   | -0.85582 |
| 0.12752  | 1376     | 3.9971  | 3.1029   | -0.55283 | 1057   | 2.176   | 5.514    | -1.08949 |
| 0.773795 | 2341     | 2.3921  | 4.7079   | -0.83904 | 2216   | 2.5271  | 5.1629   | -1.02007 |
| 0.631392 | 1677     | 5.6052  | 1.4948   | -0.26607 | 1147   | 4.272   | 3.418    | -0.67506 |
| -0.35464 | 1194     | 1.7588  | 5.3412   | -0.95197 | 1415   | 3.5336  | 4.1564   | -0.82106 |
| -0.90515 | 1058     | 2.8355  | 4.2645   | -0.75997 | 1213   | 4.2869  | 3.4031   | -0.67212 |
|          | 1518     | 7.09725 | 3.78905  |          | 1399.5 | 7.68615 | 3.41725  |          |
|          |          |         | 11.36715 |          |        |         | 10.25175 |          |
|          |          |         | 5.607794 |          |        |         | 5.05753  |          |
| 1718     | 34.109   |         | 1649     | 20.497   |        |         |          |          |
| 2807     | 48.985   |         | 2280     | 27.588   |        |         |          |          |
| 1519     | 35.945   |         | 1959     | 18.632   |        |         |          |          |
| 2311     | 19.472   |         | 2345     | 18.806   |        |         |          |          |
| 2088.75  | 34.62775 |         | 2058.25  | 21.38075 |        |         |          |          |

|          |          |          |          |     |        |
|----------|----------|----------|----------|-----|--------|
| 585.1919 | 12.08072 | 320.7984 | 4.222793 |     |        |
| 789      | 11.914   | 481      | 7.6923   |     |        |
| 994      | 8.0483   | 335      | 11.045   |     |        |
| 548      | 8.0292   | 602      | 11.296   |     |        |
|          |          | 377      | 8.7533   | 607 | 1.9769 |
| 777      | 9.3305   | 448.75   | 9.69665  |     |        |
| 223.242  | 2.237397 | 119.1816 | 1.7591   |     |        |
|          | 36.24217 |          | 12.66838 |     |        |
|          | 6.712191 |          | 5.277299 |     |        |
|          | 42.95436 |          | 17.94568 |     |        |
|          | 25.29725 |          | 11.6841  |     |        |
|          | 1.697985 |          | 1.535906 |     |        |
|          | -0.69799 |          | -0.53591 |     |        |

|      |        |      |        |  |  |
|------|--------|------|--------|--|--|
| 109  | 39.45  | 93   | 31.183 |  |  |
| 100  | 36     | 58   | 27.586 |  |  |
| 763  | 4.325  | 1271 | 8.812  |  |  |
| 1139 | 8.2529 | 1106 | 2.4412 |  |  |
| 2664 | 2.7778 | 3454 | 11.639 |  |  |
| 4291 | 10.114 | 3512 | 9.5957 |  |  |

x toxic a,b,c



x toxic a,b,c

y

x toxic b,c



x toxic a,b,c

x toxic a,b,c

|           |                        |                  | cell ct | % inf   | AD      |
|-----------|------------------------|------------------|---------|---------|---------|
| 50078 A02 | M-031922- similar to R | 284942 MGC70863  | 1260    | 5.7143  | 1.2743  |
| 50078 A04 | M-023179- dual specifi | 285193 DUSP28    | 452     | 11.062  | 6.622   |
| 50078 A05 | M-018978- hypothetic:  | 284034 FLJ34690  | 810     | 4.9383  | 0.4983  |
| 50078 A06 | M-018799- hypothetic:  | 284131 FLJ35220  | 824     | 11.893  | 7.453   |
| 50078 A07 | M-018229- CMT1A dup    | 284040 CDRT4     | 448     | 13.17   | 8.73    |
| 50078 A08 | M-018854- RANBP2-lik   | 285190 RGPD4     | 865     | 9.8266  | 5.3866  |
| 50078 A09 | M-018980- hypothetic:  | 284047 FLJ36492  | 666     | 3.4535  | 0.9865  |
| 50078 A10 | M-007335- solute carri | 285195 SLC9A9    | 1527    | 5.4355  | 0.9955  |
| 50078 A11 | M-031748- KIAA1267     | 284058 KIAA1267  | 367     | 20.708  | 16.268  |
| 50078 A12 | M-028149- hypothetic:  | 285194 LOC285194 | 641     | 8.2683  | 3.8283  |
| 50078 A13 | M-030894- Similar to h | 284069 MGC34829  | 841     | 15.577  | 11.137  |
| 50078 A14 | M-023180- aquaporin    | 285192 AQP12B    | 382     | 10.995  | 6.555   |
| 50078 A15 | M-023196- hypothetic:  | 284071 FLJ35848  | 863     | 5.562   | 1.122   |
| 50078 A16 | M-022541- plasminoge   | 285189 PLGLA1    | 1051    | 15.794  | 11.354  |
| 50078 A17 | M-018230- tubulin tyrc | 284076 TTL6      | 719     | 15.021  | 10.581  |
| 50078 A18 | M-027237- RUN and F    | 285180 RUFY4     | 339     | 16.224  | 11.784  |
| 50078 A19 | M-018180- chromoson    | 284083 C17orf47  | 1203    | 6.3175  | 1.8775  |
| 50078 A20 | M-018852- chromoson    | 285175 C2orf21   | 449     | 4.0089  | 0.4311  |
| 50078 A21 | M-018227- hypothetic:  | 284085 FLJ40504  | 210     | 14.286  | 9.846   |
| 50078 A23 | M-021480- phosphatid   | 284098 PIGW      | 243     | 9.8765  | 5.4365  |
| 50078 B02 | M-017485- stoned B/T   | 286749 SALF      | 1487    | 1.4122  | 3.0278  |
| 50078 B04 | M-018486- immunogl     | 286676 ILDR1     | 1177    | 2.0391  | 2.4009  |
| 50078 B05 | M-023260- chromoson    | 285203 C3orf64   | 1821    | 7.8528  | 3.4128  |
| 50078 B06 | M-018022- BCL6 co-rej  | 286554 BCORL2    | 1790    | 4.0223  | 0.4177  |
| 50078 B07 | M-023570- hypothetic:  | 285205 LOC285205 | 1086    | 6.2615  | 1.8215  |
| 50078 B08 | M-024797- Ras-like GT  | 286526 LOC286526 | 499     | 4.8096  | 0.3696  |
| 50078 B09 | M-032001- F-box and \  | 285231 FBXW12    | 575     | 8.3478  | 3.9078  |
| 50078 B10 | M-018000- melanoma     | 286514 MAGEB18   | 979     | 11.338  | 6.898   |
| 50078 B11 | M-009016- chromoson    | 285237 C3orf38   | 491     | 5.0916  | 0.6516  |
| 50078 B12 | M-018026- family with  | 286499 FAM133A   | 563     | 9.4139  | 4.9739  |
| 50078 B13 | M-009120- 5-hydroxyt   | 285242 HTR3E     | 1550    | 6.1935  | 1.7535  |
| 50078 B14 | M-018029- hypothetic:  | 286485 FLJ33610  | 860     | 5.5814  | 1.1414  |
| 50078 B15 | M-018125- zinc finger  | 285267 ZNF619    | 945     | 8.7831  | 4.3431  |
| 50078 B16 | M-032228- ubiquitin-c  | 286480 UBE2E4P   | 1246    | 5.7785  | 1.3385  |
| 50078 B17 | M-032023- zinc finger  | 285268 ZNF621    | 1579    | 13.743  | 9.303   |
| 50078 B18 | M-031617- ras-related  | 286472 RAC1P4    | 597     | 9.8827  | 5.4427  |
| 50078 B19 | M-018128- RAB, memt    | 285282 RABL3     | 1619    | 4.3237  | 0.1163  |
| 50078 B20 | M-018043- chromoson    | 286464 CXorf59   | 1546    | 18.693  | 14.253  |
| 50078 B21 | M-028053- hypothetic:  | 285286 LOC285286 | 718     | 10.306  | 5.866   |
| 50078 B23 | M-018007- immunogl     | 285313 IGSF10    | 385     | 16.623  | 12.183  |
| 50078 C02 | M-018148- family with  | 285172 FAM126B   | 738     | 0.67751 | 3.76249 |
| 50078 C04 | M-018150- hypothetic:  | 285154 MGC34824  | 719     | 4.4506  | 0.0106  |
| 50078 C05 | M-018802- chromoson    | 284099 C17orf78  | 918     | 1.0893  | 3.3507  |
| 50078 C06 | M-018849- hypothetic:  | 285150 FLJ33534  | 1394    | 0.71736 | 3.72264 |
| 50078 C07 | M-030984- hypothetic:  | 284100 LOC284100 | 2235    | 1.0291  | 3.4109  |
| 50078 C08 | M-022985- isoamyl ace  | 285148 IAH1      | 1585    | 0.25237 | 4.18763 |

|           |                        |                  |      |         |         |
|-----------|------------------------|------------------|------|---------|---------|
| 50078 C09 | M-030876- hypothetical | 284106 LOC284106 | 1504 | 1.2633  | 3.1767  |
| 50078 C10 | M-018151- fibrous she  | 285135 FSIP2     | 968  | 1.6529  | 2.7871  |
| 50078 C11 | M-018466- gasdermin    | 284110 GSDM1     | 1643 | 8.3384  | 3.8984  |
| 50078 C12 | M-018153- DnaJ (Hsp4   | 285126 DNAJC5G   | 1676 | 3.9976  | 0.4424  |
| 50078 C13 | M-007395- solute carri | 284111 SLC13A5   | 1432 | 2.4441  | 1.9959  |
| 50078 C14 | M-017660- hypothetical | 285097 FLJ38379  | 1430 | 1.8182  | 2.6218  |
| 50078 C15 | M-018245- transmembr   | 284114 TMEM102   | 2224 | 9.4874  | 5.0474  |
| 50078 C16 | M-018155- hypothetical | 285093 FLJ33590  | 2130 | 3.615   | 0.825   |
| 50078 C17 | M-012807- polymerase   | 284119 PTRF      | 1568 | 1.4668  | 2.9732  |
| 50078 C18 | M-018157- hypothetical | 285051 FLJ40172  | 2944 | 5.8084  | 1.3684  |
| 50078 C19 | M-031001- hypothetical | 284121 LOC284121 | 2297 | 1.0884  | 3.3516  |
| 50078 C20 | M-027824- hypothetical | 285045 LOC285045 | 1655 | 0.96677 | 3.47323 |
| 50078 C21 | M-031894- family with  | 284123 FAM27L    | 1721 | 3.835   | 0.605   |
| 50078 C23 | M-007490- solute carri | 284129 SLC26A11  | 2051 | 2.8279  | 1.6121  |
| 50078 D02 | M-018045- Yip1 domai   | 286451 YIPF6     | 2477 | 0.8478  | 3.5922  |
| 50078 D04 | M-031665- hypothetical | 286442 LOC286442 | 3146 | 4.7044  | 0.2644  |
| 50078 D05 | M-018126- chromosom    | 285315 C3orf33   | 1362 | 2.79    | 1.65    |
| 50078 D06 | M-024784- H2B histon   | 286436 H2BFM     | 2670 | 2.0225  | 2.4175  |
| 50078 D07 | M-018857- chromosom    | 285322 C3orf53   | 1492 | 4.2895  | 0.1505  |
| 50078 D08 | M-031623- hypothetical | 286411 LOC286411 | 958  | 0.41754 | 4.02246 |
| 50078 D09 | M-023454- hypothetical | 285326 LOC285326 | 1300 | 3.0769  | 1.3631  |
| 50078 D10 | M-027287- ATPase, Cla  | 286410 ATP11C    | 2914 | 6.3487  | 1.9087  |
| 50078 D11 | M-028111- coiled-coil  | 285331 CCDC66    | 1480 | 3.4459  | 0.9941  |
| 50078 D12 | M-032011- FOXD4-like   | 286380 FOXD4L2   | 1997 | 6.9104  | 2.4704  |
| 50078 D13 | M-023575- solute carri | 285335 SLC9A10   | 2237 | 9.4323  | 4.9923  |
| 50078 D14 | M-018872- hypothetical | 286359 LOC286359 | 1418 | 6.9817  | 2.5417  |
| 50078 D15 | M-018121- chromosom    | 285343 C3orf23   | 1848 | 8.3874  | 3.9474  |
| 50078 D16 | M-031930- chromosom    | 286343 C9orf150  | 2142 | 2.1008  | 2.3392  |
| 50078 D17 | M-023477- hypothetical | 285346 LOC285346 | 1982 | 6.3572  | 1.9172  |
| 50078 D18 | M-015108- family with  | 286336 FAM78A    | 1774 | 2.5366  | 1.9034  |
| 50078 D19 | M-018123- zinc finger  | 285349 ZNF660    | 2730 | 7.2527  | 2.8127  |
| 50078 D20 | M-029586- chromosom    | 286333 C9orf109  | 1747 | 3.7779  | 0.6621  |
| 50078 D21 | M-023699- phosphatidyl | 285359 LOC285359 | 2274 | 13.852  | 9.412   |
| 50078 D23 | M-019387- sulfatase m  | 285362 SUMF1     | 688  | 9.3023  | 4.8623  |
| 50078 E02 | M-027823- hypothetical | 285043 LOC285043 | 2175 | 2.2989  | 2.1411  |
| 50078 E04 | M-027904- hypothetical | 285033 LOC285033 | 1600 | 4.9375  | 0.4975  |
| 50078 E05 | M-018992- glyceropho   | 284161 GDPD1     | 1625 | 2.8923  | 1.5477  |
| 50078 E06 | M-031780- hypothetical | 285025 FLJ39502  | 2009 | 3.783   | 0.657   |
| 50078 E07 | M-018224- dynein, axc  | 284176 DNAHL1    | 1816 | 1.9824  | 2.4576  |
| 50078 E08 | M-018848- hypothetical | 285023 DKFZp451M | 1791 | 3.5734  | 0.8666  |
| 50078 E09 | M-018251- chromosom    | 284185 C17orf55  | 2256 | 7.3582  | 2.9182  |
| 50078 E10 | M-022819- hypothetical | 285016 hCG_19901 | 2477 | 2.3415  | 2.0985  |
| 50078 E11 | M-018301- transmembr   | 284186 TMEM105   | 1308 | 4.5107  | 0.0707  |
| 50078 E12 | M-027797- hypothetical | 285000 LOC285000 | 1829 | 4.4833  | 0.0433  |
| 50078 E13 | M-022983- meteorin, f  | 284207 METRNL    | 1455 | 6.4605  | 2.0205  |
| 50078 E14 | M-007169- ring finger  | 284996 RNF149    | 2350 | 11.362  | 6.922   |
| 50078 E15 | M-031009- hypothetical | 284214 LOC284214 | 2328 | 11.942  | 7.502   |

|           |                         |                   |      |         |         |
|-----------|-------------------------|-------------------|------|---------|---------|
| 50078 E16 | M-018168- hypothetical  | 284992 FLJ39660   | 2750 | 11.673  | 7.233   |
| 50078 E17 | M-031018- chromosom     | 284221 C18orf30   | 1795 | 4.7911  | 0.3511  |
| 50078 E18 | M-022464- acrosin-like  | 284967 bA395L14.: | 1941 | 9.119   | 4.679   |
| 50078 E19 | M-023377- chromosom     | 284222 C18orf58   | 2845 | 14.974  | 10.534  |
| 50078 E20 | M-027342- SH2 domai     | 284948 SH2D6      | 1485 | 12.121  | 7.681   |
| 50078 E21 | M-031033- hypothetical  | 284240 LOC284240  | 1858 | 7.6426  | 3.2026  |
| 50078 E23 | M-018674- hypothetical  | 284241 FLJ25715   | 1074 | 12.291  | 7.851   |
| 50078 F02 | M-018548- family with   | 286301 FAM27E3    | 2965 | 3.8786  | 0.5614  |
| 50078 F04 | M-018048- chromosom     | 286262 C9orf75    | 1967 | 1.9319  | 2.5081  |
| 50078 F05 | M-018119- RNA pseud     | 285367 RPU5D3     | 2092 | 0.71702 | 3.72298 |
| 50078 F06 | M-026038- chromosom     | 286257 C9orf142   | 3200 | 3.9062  | 0.5338  |
| 50078 F07 | M-023444- proline-rich  | 285368 PRRT3      | 1757 | 2.5043  | 1.9357  |
| 50078 F08 | M-017773- lipocalcin 1  | 286256 LCN12      | 2332 | 4.0309  | 0.4091  |
| 50078 F09 | M-028074- hypothetical  | 285375 LOC285375  | 1753 | 7.0736  | 2.6336  |
| 50078 F10 | M-029522- hypothetical  | 286238 LOC286238  | 1886 | 1.5907  | 2.8493  |
| 50078 F11 | M-031948- DPH3, KTI1    | 285381 DPH3       | 1118 | 0.71556 | 3.72444 |
| 50078 F12 | M-026010- hypothetical  | 286235 LOC286235  | 2870 | 4.5645  | 0.1245  |
| 50078 F13 | M-032241- family with   | 285386 FAM79B     | 2199 | 1.7281  | 2.7119  |
| 50078 F14 | M-018013- chromosom     | 286234 C9orf79    | 1983 | 6.0514  | 1.6114  |
| 50078 F15 | M-018710- hypothetical  | 285398 LOC285398  | 1648 | 0.91019 | 3.52981 |
| 50078 F16 | M-026255- chromosom     | 286207 C9orf117   | 1360 | 1.9853  | 2.4547  |
| 50078 F17 | M-028114- hypothetical  | 285401 LOC285401  | 1446 | 1.9364  | 2.5036  |
| 50078 F18 | M-018050- chromosom     | 286205 C9orf126   | 2968 | 9.2318  | 4.7918  |
| 50078 F19 | M-028265- hypothetical  | 285422 LOC285422  | 2454 | 7.5795  | 3.1395  |
| 50078 F20 | M-018054- crumbs ho     | 286204 CRB2       | 2654 | 7.272   | 2.832   |
| 50078 F21 | M-024206- WD repeat     | 285429 WDR21B     | 2835 | 4.6914  | 0.2514  |
| 50078 F23 | M-024114- cytochrom     | 285440 CYP4V2     | 1412 | 1.8414  | 2.5986  |
| 50078 G02 | M-018194- hypothetical  | 284944 FLJ37357   | 1906 | 1.1542  | 3.2858  |
| 50078 G04 | M-031503- hypothetical  | 284933 LOC284933  | 1667 | 4.5591  | 0.1191  |
| 50078 G05 | M-027276- potassium     | 284252 KCTD1      | 1124 | 2.669   | 1.771   |
| 50078 G06 | M-031929- hypothetical  | 284912 LOC284912  | 757  | 2.7741  | 1.6659  |
| 50078 G07 | M-018222- chromosom     | 284254 C18orf26   | 1484 | 2.5606  | 1.8794  |
| 50078 G08 | M-019246- SEC14-like    | 284904 SEC14L4    | 1210 | 1.3223  | 3.1177  |
| 50078 G09 | M-018170- family with   | 284257 FAM44C     | 1124 | 0.80071 | 3.63929 |
| 50078 G10 | M-031457- hypothetical  | 284898 LOC284898  | 1343 | 4.5421  | 0.1021  |
| 50078 G11 | M-023427- sialic acid b | 284266 SIGLEC15   | 1176 | 2.381   | 2.059   |
| 50078 G12 | M-031890- hypothetical  | 284861 LOC284861  | 1279 | 4.1439  | 0.2961  |
| 50078 G13 | M-010188- zinc bindin   | 284273 ZADH2      | 761  | 6.8331  | 2.3931  |
| 50078 G14 | M-019296- hypothetical  | 284837 LOC284837  | 1562 | 2.6248  | 1.8152  |
| 50078 G15 | M-031049- hypothetical  | 284274 LOC284274  | 2149 | 3.49    | 0.95    |
| 50078 G16 | M-019297- chromosom     | 284836 C21orf125  | 625  | 0.64    | 3.8     |
| 50078 G17 | M-018255- hypothetical  | 284296 LOC284296  | 900  | 1.6667  | 2.7733  |
| 50078 G18 | M-031382- chromosom     | 284835 C21orf130  | 705  | 4.3972  | 0.0428  |
| 50078 G19 | M-023621- hypothetical  | 284297 LOC284297  | 1138 | 1.7575  | 2.6825  |
| 50078 G20 | M-018688- keratin ass   | 284827 KRTAP13-4  | 1509 | 1.4579  | 2.9821  |
| 50078 G21 | M-023832- zinc finger   | 284307 ZIK1       | 2621 | 4.4258  | 0.0142  |
| 50078 G23 | M-018210- zinc finger   | 284309 ZNF776     | 1883 | 5.948   | 1.508   |

|           |                                   |                  |      |         |         |
|-----------|-----------------------------------|------------------|------|---------|---------|
| 50078 H02 | M-029378- hypothetical            | 286186 LOC286186 | 2543 | 4.4042  | 0.0358  |
| 50078 H04 | M-018052- family with             | 286183 FAM77D    | 1545 | 3.6246  | 0.8154  |
| 50078 H05 | M-028300- hypothetical            | 285441 LOC285441 | 1789 | 4.0246  | 0.4154  |
| 50078 H06 | M-029373- hypothetical            | 286177 LOC286177 | 1383 | 2.7477  | 1.6923  |
| 50078 H07 | M-018858- hypothetical            | 285456 FLJ37673  | 1662 | 1.5644  | 2.8756  |
| 50078 H08 | M-018733- hypothetical            | 286161 LOC286161 | 816  | 2.0833  | 2.3567  |
| 50078 H09 | M-018504- cysteine-ric            | 285464 CRIPAK    | 1708 | 2.2248  | 2.2152  |
| 50078 H10 | M-029344- hypothetical            | 286149 LOC286149 | 982  | 5.8045  | 1.3645  |
| 50078 H11 | M-028326- hypothetical            | 285484 LOC285484 | 981  | 1.4271  | 3.0129  |
| 50078 H12 | M-018930- dpy-19-like             | 286148 DPY19L4   | 1588 | 2.8967  | 1.5433  |
| 50078 H13 | M-018805- docking pro             | 285489 DOK7      | 1534 | 3.455   | 0.985   |
| 50078 H14 | M-029342- hypothetical            | 286144 LOC286144 | 1287 | 6.5268  | 2.0868  |
| 50078 H15 | M-018114- hypothetical            | 285492 FLJ35424  | 1735 | 6.1095  | 1.6695  |
| 50078 H16 | M-029334- hypothetical            | 286135 LOC286135 | 2301 | 3.4333  | 1.0067  |
| 50078 H17 | M-008019- ring finger             | 285498 RNF212    | 939  | 4.4728  | 0.0328  |
| 50078 H18 | M-018056- scavenger r             | 286133 SCARA5    | 1210 | 3.4711  | 0.9689  |
| 50078 H19 | M-024106- hypothetical            | 285501 LOC285501 | 2153 | 7.5708  | 3.1308  |
| 50078 H20 | M-018062- zinc finger             | 286128 ZFP41     | 2111 | 2.2738  | 2.1662  |
| 50078 H21 | M-031783- GPRIN fam               | 285513 GPRIN3    | 1358 | 11.635  | 7.195   |
| 50078 H23 | M-018117- COX18 cytc              | 285521 COX18     | 1296 | 5.2469  | 0.8069  |
| 50078 I02 | M-031369- hypothetical            | 284825 LOC284825 | 1252 | 3.6741  | 0.7659  |
| 50078 I04 | M-018847- hypothetical            | 284805 FLJ33706  | 1392 | 4.7414  | 0.3014  |
| 50078 I05 | M-018581- zinc finger             | 284312 ZSCAN1    | 1346 | 11.961  | 7.521   |
| 50078 I06 | M-032042- similar to F            | 284802 MGC72104  | 276  | 9.4203  | 4.9803  |
| 50078 I07 | M-023702- zinc finger             | 284323 ZNF780A   | 1063 | 2.0696  | 2.3704  |
| 50078 I08 | M-031344- hypothetical            | 284801 LOC284801 | 1055 | 3.6967  | 0.7433  |
| 50078 I09 | M-027230- chromosom               | 284325 C19orf54  | 1430 | 5.1049  | 0.6649  |
| 50078 I10 | M-018843- chromosom               | 284800 C20orf91  | 645  | 19.07   | 14.63   |
| 50078 I11 | M-018209- transmemk               | 284339 TMEM145   | 868  | 12.442  | 8.002   |
| 50078 I12 | M-031342- hypothetical            | 284798 LOC284798 | 992  | 8.0645  | 3.6245  |
| 50078 I13 | M-027232- DMC                     | 284340 UNQ473    | 894  | 14.206  | 9.766   |
| 50078 I14 | M-031339- hypothetical            | 284788 LOC284788 | 1821 | 11.642  | 7.202   |
| 50078 I15 | M-032235- pleckstrin f            | 284345 PHLDB3    | 1523 | 11.49   | 7.05    |
| 50078 I16 | M-018839- hypothetical            | 284765 MGC34919  | 2333 | 9.5156  | 5.0756  |
| 50078 I17 | M-017929- zinc finger             | 284346 ZNF575    | 2375 | 6.3579  | 1.9179  |
| 50078 I18 | M-031322- signal-regu             | 284759 SIRPB2    | 1237 | 4.1229  | 0.3171  |
| 50078 I19 | M-018677- LY6/PLAUR               | 284348 LYPD5     | 1821 | 6.8094  | 2.3694  |
| 50078 I20 | M-018187- chromosom               | 284756 C20orf197 | 1319 | 8.3397  | 3.8997  |
| 50078 I21 | M-031116- zinc finger             | 284349 ZNF283    | 1811 | 6.1844  | 1.7444  |
| 50078 I23 | M-023860- hypothetical            | 284352 LOC284352 | 1364 | 3.6657  | 0.7743  |
| 50078 J02 | M-018064- chromosom               | 286122 C8orf31   | 1247 | 0.72173 | 3.71827 |
| 50078 J03 | D-001206- siControl non-targetinç |                  | 1487 | 0.4035  | 4.0365  |
| 50078 J04 | M-025852- hypothetical            | 286114 LOC286114 | 2473 | 3.6393  | 0.8007  |
| 50078 J05 | M-018859- Yip1 domai              | 285525 YIPF7     | 1727 | 3.1268  | 1.3132  |
| 50078 J06 | M-029302- zinc finger             | 286101 ZNF252    | 1986 | 3.6254  | 0.8146  |
| 50078 J07 | M-007170- ring finger             | 285533 RNF175    | 1461 | 2.6694  | 1.7706  |
| 50078 J08 | M-018623- EF-hand do              | 286097 EFHA2     | 2374 | 2.1904  | 2.2496  |

|           |                                 |                   |      |         |         |
|-----------|---------------------------------|-------------------|------|---------|---------|
| 50078 J09 | M-028348- hypothetical          | 285540 LOC285540  | 1133 | 0.97087 | 3.46913 |
| 50078 J10 | M-025841- hypothetical          | 286094 LOC286094  | 2050 | 1.4634  | 2.9766  |
| 50078 J11 | M-028344- hypothetical          | 285547 LOC285547  | 1872 | 2.0833  | 2.3567  |
| 50078 J12 | M-027239- family with           | 286077 FAM83H     | 1437 | 1.3222  | 3.1178  |
| 50078 J13 | M-028345- hypothetical          | 285548 LOC285548  | 1321 | 1.8168  | 2.6232  |
| 50078 J14 | M-018065- zinc finger           | 286075 ZNF707     | 2549 | 5.3354  | 0.8954  |
| 50078 J15 | M-024218- hypothetical          | 285550 LOC285550  | 2501 | 2.7189  | 1.7211  |
| 50078 J16 | M-018070- non-SMC e             | 286053 NSMCE2     | 1291 | 2.0914  | 2.3486  |
| 50078 J17 | M-018031- hypothetical          | 285555 MGC46496   | 2123 | 4.8516  | 0.4116  |
| 50078 J18 | M-018072- chromosom             | 439941 C8orf54    | 4059 | 2.6854  | 1.7546  |
| 50078 J19 | M-028236- hypothetical          | 285556 LOC285556  | 2197 | 0.95585 | 3.48415 |
| 50078 J20 | M-018074- XK, Kell blo          | 286046 XKR6       | 2749 | 8.5486  | 4.1086  |
| 50078 J21 | M-018113- NY-REN-7 a            | 285596 NY-REN-7   | 2380 | 2.563   | 1.877   |
| 50078 J23 | M-018112- ADP-ribosy            | 285598 ARL10      | 1913 | 5.1751  | 0.7351  |
| 50078 K02 | M-031309- hypothetical          | 284751 LOC284751  | 2228 | 5.2962  | 0.8562  |
| 50078 K03 | D-001600-(siGLO RISC-free siRNA |                   | 5365 | 6.3747  | 1.9347  |
| 50078 K04 | M-031307- hypothetical          | 284749 LOC284749  | 1527 | 4.7151  | 0.2751  |
| 50078 K05 | M-027233- NTPase, KA            | 284353 NKPD1      | 3779 | 6.9066  | 2.4666  |
| 50078 K06 | M-018186- zinc finger           | 284747 ZNF663     | 1373 | 2.3307  | 2.1093  |
| 50078 K07 | M-027234- tetra-pepti           | 284355 TPRX1      | 3175 | 2.9921  | 1.4479  |
| 50078 K08 | M-031294- proline rich          | 284739 PRR17      | 2465 | 0.93306 | 3.50694 |
| 50078 K09 | M-018696- likely ortho          | 284358 FLJ36070   | 2829 | 4.7367  | 0.2967  |
| 50078 K10 | M-027677- espin pseu            | 284729 ESPNP      | 2657 | 3.2367  | 1.2033  |
| 50078 K11 | M-018698- izumo sper            | 284359 IZUMO1     | 1190 | 5.7983  | 1.3583  |
| 50078 K12 | M-032041- solute carri          | 284723 SLC25A34   | 2621 | 5.5322  | 1.0922  |
| 50078 K13 | M-018434- hematopoi             | 284361 LOC284361  | 1186 | 8.2631  | 3.8231  |
| 50078 K14 | M-018196- family with           | 284716 FAM80A     | 2080 | 5.4808  | 1.0408  |
| 50078 K15 | M-031135- hypothetical          | 284365 MGC45922   | 1580 | 6.0759  | 1.6359  |
| 50078 K16 | M-019409- BTB (POZ) c           | 284697 BTBD8      | 2948 | 13.84   | 9.4     |
| 50078 K17 | M-005920- kallikrein-r          | 284366 KLK9       | 2177 | 7.1658  | 2.7258  |
| 50078 K18 | M-019269- zinc finger           | 284695 ZNF326     | 2658 | 3.3484  | 1.0916  |
| 50078 K19 | M-023790- sialic acid b         | 284367 SIGLECP3   | 1836 | 15.577  | 11.137  |
| 50078 K20 | M-027594- hypothetical          | 284688 RP11-297H  | 2012 | 10.686  | 6.246   |
| 50078 K21 | M-018207- hypothetical          | 284369 FLJ40235   | 801  | 6.9913  | 2.5513  |
| 50078 K23 | M-032239- zinc finger           | 284370 ZNF615     | 1733 | 6.4628  | 2.0228  |
| 50078 L02 | M-018867- chromosom             | 286032 C8orf79    | 2026 | 4.4916  | 0.0516  |
| 50078 L04 | M-018067- hypothetical          | 286023 FLJ40288   | 1863 | 2.6838  | 1.7562  |
| 50078 L05 | M-018110- chromosom             | 285600 C5orf36    | 2904 | 2.5138  | 1.9262  |
| 50078 L06 | M-031761- hypothetical          | 286016 tcag7.1015 | 3731 | 9.4613  | 5.0213  |
| 50078 L07 | M-032227- G protein-c           | 285601 GPR150     | 1647 | 1.3358  | 3.1042  |
| 50078 L08 | M-028925- hypothetical          | 286009 tcag7.929  | 3523 | 4.5416  | 0.1016  |
| 50078 L09 | M-018520- hypothetical          | 285603 FLJ39485   | 3043 | 1.5774  | 2.8626  |
| 50078 L10 | M-018866- hypothetical          | 286006 FLJ39575   | 2894 | 8.2585  | 3.8185  |
| 50078 L11 | M-018032- DTW doma              | 285605 DTWD2      | 2538 | 12.136  | 7.696   |
| 50078 L12 | M-025421- zinc finger           | 285989 ZNF789     | 3392 | 7.4292  | 2.9892  |
| 50078 L13 | M-018109- chromosom             | 285613 C5orf16    | 3978 | 4.0473  | 0.3927  |
| 50078 L14 | M-028910- hypothetical          | 285987 FLJ34048   | 2758 | 7.3967  | 2.9567  |

|           |                        |                  |      |         |         |
|-----------|------------------------|------------------|------|---------|---------|
| 50078 L15 | M-024519- hypothetic   | 285622 RP5-964H1 | 2883 | 5.0989  | 0.6589  |
| 50078 L16 | M-028876- hypothetic   | 285972 LOC285972 | 2680 | 13.993  | 9.553   |
| 50078 L17 | M-028404- hypothetic   | 285626 LOC285626 | 2944 | 5.6046  | 1.1646  |
| 50078 L18 | M-007171- zinc finger  | 285971 ZNF775    | 3003 | 5.2614  | 0.8214  |
| 50078 L19 | M-028405- hypothetic   | 285629 LOC285629 | 3144 | 5.2481  | 0.8081  |
| 50078 L20 | M-018084- hypothetic   | 285970 FLJ36112  | 3199 | 14.004  | 9.564   |
| 50078 L21 | M-018528- hypothetic   | 285636 LOC285636 | 2453 | 9.8655  | 5.4255  |
| 50078 L23 | M-028456- hypothetic   | 285638 LOC285638 | 1816 | 6.0022  | 1.5622  |
| 50078 M02 | M-018836- chromosom    | 284680 C1orf111  | 2335 | 1.9272  | 2.5128  |
| 50078 M04 | M-027567- hypothetic   | 284661 LOC284661 | 2314 | 2.1175  | 2.3225  |
| 50078 M05 | M-023804- hypothetic   | 284371 LOC284371 | 3199 | 3.6574  | 0.7826  |
| 50078 M06 | M-005325- EPH recept   | 284656 EPHA10    | 2357 | 4.2851  | 0.1549  |
| 50078 M07 | M-031149- solute carri | 284379 LOC284379 | 2117 | 0.66131 | 3.77869 |
| 50078 M08 | M-018179- R-spondin l  | 284654 RSPO1     | 1717 | 3.378   | 1.062   |
| 50078 M09 | M-017981- hypothetic   | 284382 MGC33407  | 1138 | 3.9543  | 0.4857  |
| 50078 M10 | M-027695- hypothetic   | 284628 LOC284628 | 2415 | 1.7805  | 2.6595  |
| 50078 M11 | M-031222- hypothetic   | 284385 LOC284385 | 1897 | 2.4249  | 2.0151  |
| 50078 M12 | M-018171- chromosom    | 284618 C1orf104  | 1847 | 2.7071  | 1.7329  |
| 50078 M13 | M-031229- zinc finger  | 284390 ZNF763    | 1943 | 2.7792  | 1.6608  |
| 50078 M14 | M-018830- cytochrom    | 284613 CYB561D1  | 1795 | 2.2841  | 2.1559  |
| 50078 M15 | M-031230- hypothetic   | 284391 FLJ14959  | 2300 | 7.0435  | 2.6035  |
| 50078 M16 | M-022398- neuroblast   | 284610 NBPF5     | 1645 | 1.8237  | 2.6163  |
| 50078 M17 | M-031074- hypothetic   | 284395 LOC284395 | 3721 | 5.9124  | 1.4724  |
| 50078 M18 | M-031713- hypothetic   | 284600 LOC284600 | 2466 | 4.9067  | 0.4667  |
| 50078 M19 | M-031087- hypothetic   | 284402 LOC284402 | 1885 | 1.1141  | 3.3259  |
| 50078 M20 | M-031712- family with  | 284593 FAM41C    | 1714 | 2.7421  | 1.6979  |
| 50078 M21 | M-015354- zinc finger  | 284406 ZNF545    | 2374 | 1.9377  | 2.5023  |
| 50078 M23 | M-027236- V-set and t  | 284415 VSTM1     | 674  | 0.89021 | 3.54979 |
| 50078 N02 | M-018080- hypothetic   | 285966 FLJ40722  | 1245 | 0.16064 | 4.27936 |
| 50078 N04 | M-006320- hypothetic   | 285962 FLJ40852  | 2939 | 0.20415 | 4.23585 |
| 50078 N05 | M-007552- solute carri | 285641 SLC36A3   | 4304 | 2.3234  | 2.1166  |
| 50078 N06 | M-019231- Williams Be  | 285955 WBSCR19   | 2168 | 0.55351 | 3.88649 |
| 50078 N07 | M-031966- olfactory re | 285659 OR2V2     | 3368 | 0.62352 | 3.81648 |
| 50078 N08 | M-028822- hypothetic   | 285941 LOC285941 | 3218 | 0.43505 | 4.00495 |
| 50078 N09 | M-018107- hypothetic   | 285668 FLJ37543  | 1427 | 1.6819  | 2.7581  |
| 50078 N10 | M-025288- hypothetic   | 285924 LOC285924 | 4536 | 5.6658  | 1.2258  |
| 50078 N11 | M-017714- ring finger  | 285671 RNF180    | 1892 | 2.1142  | 2.3258  |
| 50078 N12 | M-018928- hypothetic   | 285908 LOC285908 | 1372 | 0.87464 | 3.56536 |
| 50078 N13 | M-018106- P18SRP prc   | 285672 P18SRP    | 1035 | 0.96618 | 3.47382 |
| 50078 N14 | M-018864- hypothetic   | 285905 FLJ25037  | 2055 | 0.82725 | 3.61275 |
| 50078 N15 | M-018860- zinc finger  | 285676 ZNF454    | 2096 | 3.1489  | 1.2911  |
| 50078 N16 | M-028753- hypothetic   | 285889 LOC285889 | 3223 | 3.7853  | 0.6547  |
| 50078 N17 | M-024606- hypothetic   | 285679 LOC285679 | 2355 | 1.7834  | 2.6566  |
| 50078 N18 | M-028750- canopy 1 h   | 285888 CNPY1     | 2708 | 3.0281  | 1.4119  |
| 50078 N19 | M-018091- chromosom    | 285685 C5orf17   | 4243 | 4.9729  | 0.5329  |
| 50078 N20 | M-018863- hypothetic   | 285877 DKFZp564N | 4503 | 2.4206  | 2.0194  |
| 50078 N21 | M-018104- hypothetic   | 285696 FLJ34047  | 2010 | 2.2388  | 2.2012  |



|           |                         |                  |        |        |          |
|-----------|-------------------------|------------------|--------|--------|----------|
| 50078 N23 | M-018102- RGM doma      | 285704 RGMB      | 2484   | 3.4219 | 1.0181   |
| 50078 O02 | M-021842- hypothetical: | 284591 LOC284591 | 1327   | 3.0897 | 1.3503   |
| 50078 O04 | M-027508- hypothetical: | 284581 LOC284581 | 826    | 5.3269 | 0.8869   |
| 50078 O05 | M-018479- chromoson     | 284424 C19orf30  | 2884   | 5.2705 | 0.8305   |
| 50078 O06 | M-018812- chromoson     | 284573 C1orf157  | 1776   | 1.6329 | 2.8071   |
| 50078 O07 | M-007363- solute carri  | 284427 SLC25A41  | 1768   | 4.9208 | 0.4808   |
| 50078 O08 | M-018169- neuroblast    | 284565 NBPF15    | 1706   | 2.286  | 2.154    |
| 50078 O09 | M-031245- NACHT anc     | 284434 NWD1      | 736    | 5.9783 | 1.5383   |
| 50078 O10 | M-027558- hypothetical: | 284551 LOC284551 | 1734   | 3.2872 | 1.1528   |
| 50078 O11 | M-007361- solute carri  | 284439 SLC25A42  | 834    | 6.235  | 1.795    |
| 50078 O12 | M-017971- solute carri  | 284525 SLC9A11   | 2001   | 4.6477 | 0.2077   |
| 50078 O13 | M-018712- hypothetical: | 284440 MGC39821  | 1524   | 5.4462 | 1.0062   |
| 50078 O14 | M-018167- hypothetical: | 284505 FLJ35487  | 1382   | 4.4863 | 0.0463   |
| 50078 O15 | M-018435- zinc finger   | 284443 ZNF493    | 2245   | 14.967 | 10.527   |
| 50078 O16 | M-021566- chromoson     | 284498 C1orf167  | 2681   | 6.9004 | 2.4604   |
| 50078 O17 | M-018731- chromoson     | 284451 C19orf19  | 2553   | 3.0161 | 1.4239   |
| 50078 O18 | M-018792- thioesteras   | 284486 THEM5     | 1570   | 10     | 5.56     |
| 50078 O19 | M-018886- GLI-Kruppe    | 284459 HKR1      | 3282   | 5.3626 | 0.9226   |
| 50078 O20 | M-021716- hypothetical: | 284485 FLJ36032  | 2055   | 8.7105 | 4.2705   |
| 50078 O21 | M-019386- family with   | 284467 FAM19A3   | 1926   | 6.3863 | 1.9463   |
| 50078 O23 | M-027616- hypothetical: | 284475 LOC284475 | 1481   | 8.1026 | 3.6626   |
| 50078 P02 | M-027238- ribosomal p   | 285855 RPL7L1    | 1725   | 3.2464 | 1.1936   |
| 50078 P04 | M-021501- triggering r  | 285852 TREML4    | 946    | 2.2199 | 2.2201   |
| 50078 P05 | M-028550- hypothetical: | 285713 LOC285713 | 2030   | 6.601  | 2.161    |
| 50078 P06 | M-009042- patatin-like  | 285848 PNPLA1    | 2140   | 1.5888 | 2.8512   |
| 50078 P07 | M-028602- hypothetical: | 285733 LOC285733 | 2449   | 2.1233 | 2.3167   |
| 50078 P08 | M-017661- hypothetical: | 285821 FLJ37940  | 1530   | 5.098  | 0.658    |
| 50078 P09 | M-028603- hypothetical: | 285735 LOC285735 | 2017   | 5.1562 | 0.7162   |
| 50078 P10 | M-018533- hypothetical: | 285800 MGC35308  | 1578   | 5.5767 | 1.1367   |
| 50078 P11 | M-017921- hypothetical: | 285736 FLJ35700  | 2032   | 2.7067 | 1.7333   |
| 50078 P12 | M-017944- cancer anti   | 285782 CAGE1     | 2264   | 12.323 | 7.883    |
| 50078 P13 | M-028609- hypothetical: | 285740 LOC285740 | 1929   | 6.8429 | 2.4029   |
| 50078 P14 | M-018087- hypothetical: | 285780 RP3-398D1 | 3083   | 7.9468 | 3.5068   |
| 50078 P15 | M-018100- chromoson     | 285753 C6orf182  | 1821   | 6.5349 | 2.0949   |
| 50078 P16 | M-028622- hypothetical: | 285768 LOC285768 | 2173   | 3.5435 | 0.8965   |
| 50078 P17 | M-018093- hypothetical: | 285754 FLJ37396  | 1343   | 7.2971 | 2.8571   |
| 50078 P18 | M-028620- hypothetical: | 285766 LOC285766 | 2155   | 2.9234 | 1.5166   |
| 50078 P19 | M-009111- peptidylprc   | 285755 PPIL6     | 2686   | 5.2494 | 0.8094   |
| 50078 P20 | M-018055- discoidin, C  | 285761 DCBLD1    | 3283   | 6.0311 | 1.5911   |
| 50078 P21 | M-028591- hypothetical: | 285758 LOC285758 | 1304   | 1.4571 | 2.9829   |
| 50078 P23 | M-018089- hypothetical: | 285759 FLJ34503  | 733    | 4.0928 | 0.3472   |
|           |                         | MAD              | 1762.5 | 4.4382 | 2.2082   |
|           |                         | MAD3             |        |        | 6.6246   |
|           |                         | MADc             |        |        | 3.268136 |
| 50078 C22 |                         | 1278             | 15.571 |        |          |
| 50078 D22 |                         |                  | 1507   | 36.364 |          |

|           |          |          |          |
|-----------|----------|----------|----------|
| 50078 E22 |          | 1550     | 24.581   |
| 50078 F22 |          | 2087     | 31.433   |
|           | mn       | 1714.667 | 30.79267 |
|           | sd       | 323.1661 | 5.917541 |
| 50078 G22 |          | 288      | 4.5139   |
| 50078 H22 |          | 508      | 5.9055   |
| 50078 I22 |          | 215      | 4.6512   |
| 50078 J22 |          | 1124     | 3.4698   |
|           | mn       | 533.75   | 4.6351   |
|           | sd       | 412.7359 | 0.997796 |
|           | 3psSD    |          | 17.75262 |
|           | 3ngSD    |          | 2.993387 |
|           | SumSD    |          | 20.74601 |
|           | MeanDf   |          | 26.15757 |
|           | SumovrMn |          | 0.793117 |
|           | 1minus   |          | 0.206883 |

| rZ       | cell ct | % inf   | AD      | rZ       | cell ct | % inf   | AD      | rZ       |
|----------|---------|---------|---------|----------|---------|---------|---------|----------|
| 0.390467 | 709     | 1.5515  | 4.8985  | -1.10691 | 660     | 4.8485  | 1.0415  | -0.29105 |
| 2.026782 | 476     | 6.3025  | 0.1475  | -0.03357 | 794     | 9.5718  | 3.6818  | 1.023645 |
| 0.153023 | 1003    | 10.169  | 3.719   | 0.839941 | 868     | 4.9539  | 0.9361  | -0.26171 |
| 2.281056 | 623     | 9.4703  | 3.0203  | 0.682092 | 1543    | 1.9443  | 3.9457  | -1.09941 |
| 2.671798 | 432     | 13.194  | 6.744   | 1.523343 | 534     | 5.9925  | 0.1025  | 0.027375 |
| 1.648769 | 646     | 11.92   | 5.47    | 1.235523 | 1065    | 5.8216  | 0.0684  | -0.02019 |
| -0.3013  | 684     | 8.9181  | 2.4681  | 0.55734  | 614     | 4.2345  | 1.6555  | -0.46195 |
| 0.305159 | 624     | 8.8141  | 2.3641  | 0.533844 | 1572    | 2.6081  | 3.2819  | -0.91465 |
| 4.978312 | 412     | 8.9806  | 2.5306  | 0.57146  | 332     | 18.675  | 12.785  | 3.55745  |
| 1.171952 | 946     | 8.1395  | 1.6895  | 0.38144  | 1191    | 5.1217  | 0.7683  | -0.21501 |
| 3.408304 | 894     | 5.481   | 0.969   | -0.21916 | 779     | 3.8511  | 2.0389  | -0.56867 |
| 2.006281 | 535     | 5.0467  | 1.4033  | -0.31728 | 995     | 5.8291  | 0.0609  | -0.01811 |
| 0.343866 | 1302    | 2.765   | 3.685   | -0.83276 | 890     | 2.0225  | 3.8675  | -1.07764 |
| 3.474702 | 888     | 6.3063  | 0.1437  | -0.03271 | 999     | 1.001   | 4.889   | -1.36197 |
| 3.238176 | 422     | 10.427  | 3.977   | 0.898228 | 550     | 2       | 3.89    | -1.08391 |
| 3.606276 | 258     | 10.465  | 4.015   | 0.906812 | 306     | 5.5556  | 0.3344  | -0.09423 |
| 0.575037 | 847     | 10.744  | 4.294   | 0.969844 | 899     | 3.0033  | 2.8867  | -0.80465 |
| -0.13136 | 449     | 11.804  | 5.354   | 1.209317 | 577     | 9.3588  | 3.4688  | 0.964358 |
| 3.013277 | 319     | 18.182  | 11.732  | 2.650222 | 339     | 7.0796  | 1.1896  | 0.329961 |
| 1.664037 | 518     | 15.637  | 9.187   | 2.075261 | 265     | 3.0189  | 2.8711  | -0.8003  |
| -0.92591 | 1187    | 2.6116  | 3.8384  | -0.86741 | 1492    | 0.67024 | 5.21976 | -1.45403 |
| -0.73409 | 993     | 2.6183  | 3.8317  | -0.8659  | 933     | 2.8939  | 2.9961  | -0.8351  |
| 1.044816 | 1384    | 5.5636  | 0.8864  | -0.2005  | 1371    | 4.2305  | 1.6595  | -0.46306 |
| -0.12726 | 2070    | 2.8502  | 3.5998  | -0.81351 | 888     | 3.2658  | 2.6242  | -0.73158 |
| 0.557902 | 2363    | 2.2006  | 4.2494  | -0.96026 | 2388    | 3.2663  | 2.6237  | -0.73144 |
| 0.113643 | 768     | 3.3854  | 3.0646  | -0.6926  | 584     | 1.5411  | 4.3489  | -1.21164 |
| 1.196278 | 597     | 1.005   | 5.445   | -1.23037 | 865     | 3.5838  | 2.3062  | -0.64307 |
| 2.111234 | 1567    | 6.7645  | 0.3145  | 0.070803 | 2102    | 4.6622  | 1.2278  | -0.3429  |
| 0.19993  | 737     | 3.7992  | 2.6508  | -0.59911 | 1034    | 4.9323  | 0.9577  | -0.26772 |
| 1.522489 | 320     | 5       | 1.45    | -0.32783 | 280     | 14.286  | 8.396   | 2.335806 |
| 0.537095 | 852     | 2.5822  | 3.8678  | -0.87405 | 1576    | 5.4569  | 0.4331  | -0.12171 |
| 0.349802 | 1254    | 1.8341  | 4.6159  | -1.04306 | 1259    | 2.9388  | 2.9512  | -0.8226  |
| 1.329473 | 858     | 2.5641  | 3.8859  | -0.87814 | 1590    | 3.8994  | 1.9906  | -0.55522 |
| 0.410111 | 1595    | 1.2539  | 5.1961  | -1.17414 | 1489    | 1.4775  | 4.4125  | -1.22934 |
| 2.847128 | 1167    | 7.3693  | 0.9193  | 0.207438 | 2058    | 3.7415  | 2.1485  | -0.59917 |
| 1.665934 | 747     | 7.6305  | 1.1805  | 0.266448 | 1463    | 7.5871  | 1.6971  | 0.471219 |
| -0.03504 | 2016    | 6.4484  | 0.0016  | -0.00061 | 3009    | 5.683   | 0.207   | -0.05877 |
| 4.361752 | 772     | 14.378  | 7.928   | 1.79083  | 1592    | 9.7362  | 3.8462  | 1.069405 |
| 1.795458 | 338     | 4.4379  | 2.0121  | -0.45482 | 1179    | 9.3299  | 3.4399  | 0.956314 |
| 3.728364 | 393     | 13.486  | 7.036   | 1.589311 | 569     | 16.696  | 10.806  | 3.006611 |
| -1.15071 | 913     | 3.943   | 2.507   | -0.56663 | 1000    | 2.5     | 3.39    | -0.94474 |
| 0.003794 | 1134    | 8.4656  | 2.0156  | 0.455112 | 1216    | 5.3454  | 0.5446  | -0.15274 |
| -1.02471 | 1363    | 5.9428  | 0.5072  | -0.11483 | 980     | 4.3878  | 1.5022  | -0.41928 |
| -1.13852 | 2022    | 1.3353  | 5.1147  | -1.15575 | 1149    | 4.4386  | 1.4514  | -0.40514 |
| -1.04313 | 2666    | 0.97524 | 5.47476 | -1.2371  | 1693    | 2.7761  | 3.1139  | -0.86788 |
| -1.2808  | 2099    | 2.1915  | 4.2585  | -0.96232 | 2078    | 2.7911  | 3.0989  | -0.86371 |

|          |      |         |         |          |      |        |        |          |
|----------|------|---------|---------|----------|------|--------|--------|----------|
| -0.97147 | 2135 | 2.1546  | 4.2954  | -0.97066 | 2149 | 4.1415 | 1.7485 | -0.48784 |
| -0.85226 | 1665 | 5.6456  | 0.8044  | -0.18198 | 1828 | 7.8228 | 1.9328 | 0.536825 |
| 1.193402 | 2902 | 15.989  | 9.539   | 2.154784 | 1626 | 7.3801 | 1.4901 | 0.413603 |
| -0.13482 | 1349 | 9.192   | 2.742   | 0.619219 | 1960 | 9.7959 | 3.9059 | 1.086022 |
| -0.61016 | 691  | 8.1042  | 1.6542  | 0.373465 | 537  | 11.918 | 6.028  | 1.676692 |
| -0.80168 | 1324 | 4.9094  | 1.5406  | -0.3483  | 1956 | 3.272  | 2.618  | -0.72985 |
| 1.544979 | 3078 | 11.468  | 5.018   | 1.133408 | 3766 | 6.9304 | 1.0404 | 0.288432 |
| -0.25189 | 2664 | 4.7673  | 1.6827  | -0.3804  | 3250 | 1.4769 | 4.4131 | -1.22951 |
| -0.9092  | 1417 | 3.8814  | 2.5686  | -0.58054 | 1300 | 5.1538 | 0.7362 | -0.20607 |
| 0.41926  | 1374 | 1.0189  | 5.4311  | -1.22723 | 1624 | 4.0025 | 1.8875 | -0.52653 |
| -1.02499 | 1512 | 5.2249  | 1.2251  | -0.27702 | 2239 | 3.6623 | 2.2277 | -0.62122 |
| -1.0622  | 863  | 7.0684  | 0.6184  | 0.139459 | 994  | 9.1549 | 3.2649 | 0.907604 |
| -0.18457 | 1030 | 2.7184  | 3.7316  | -0.84328 | 1300 | 6.3077 | 0.4177 | 0.115108 |
| -0.49273 | 1326 | 11.614  | 5.164   | 1.166392 | 1303 | 6.9839 | 1.0939 | 0.303323 |
| -1.09861 | 1892 | 1.9556  | 4.4944  | -1.01561 | 1298 | 2.7735 | 3.1165 | -0.86861 |
| 0.081453 | 2844 | 6.5049  | 0.0549  | 0.012154 | 1616 | 7.4876 | 1.5976 | 0.443524 |
| -0.50432 | 2761 | 4.1652  | 2.2848  | -0.51643 | 2554 | 6.3038 | 0.4138 | 0.114023 |
| -0.73917 | 2781 | 2.2654  | 4.1846  | -0.94563 | 1928 | 1.7635 | 4.1265 | -1.14973 |
| -0.0455  | 1845 | 5.3659  | 1.0841  | -0.24517 | 2404 | 9.5674 | 3.6774 | 1.02242  |
| -1.23026 | 1291 | 2.866   | 3.584   | -0.80994 | 1728 | 5.0347 | 0.8553 | -0.23922 |
| -0.41654 | 1365 | 3.5165  | 2.9335  | -0.66298 | 1127 | 8.3407 | 2.4507 | 0.680978 |
| 0.584584 | 1822 | 5.2689  | 1.1811  | -0.26708 | 2926 | 4.5796 | 1.3104 | -0.36589 |
| -0.30363 | 2550 | 3.098   | 3.352   | -0.75753 | 2911 | 5.1529 | 0.7371 | -0.20632 |
| 0.756456 | 1774 | 5.3551  | 1.0949  | -0.24761 | 1711 | 4.9094 | 0.9806 | -0.2741  |
| 1.528119 | 1827 | 4.5977  | 1.8523  | -0.41872 | 2062 | 6.644  | 0.754  | 0.208715 |
| 0.778272 | 1310 | 6.1069  | 0.3431  | -0.07776 | 1051 | 5.0428 | 0.8472 | -0.23697 |
| 1.208395 | 3333 | 8.2208  | 1.7708  | 0.399807 | 2387 | 6.6611 | 0.7711 | 0.213475 |
| -0.71521 | 3935 | 4.7014  | 1.7486  | -0.39529 | 3985 | 3.5885 | 2.3015 | -0.64176 |
| 0.587185 | 2264 | 4.7261  | 1.7239  | -0.38971 | 2118 | 2.5496 | 3.3404 | -0.93093 |
| -0.58186 | 872  | 7.3394  | 0.8894  | 0.200683 | 1999 | 3.952  | 1.938  | -0.54058 |
| 0.861194 | 2897 | 6.6275  | 0.1775  | 0.039852 | 2703 | 8.3241 | 2.4341 | 0.676358 |
| -0.20204 | 2013 | 6.8554  | 0.4054  | 0.091339 | 2424 | 3.6304 | 2.2596 | -0.6301  |
| 2.88048  | 2256 | 9.1312  | 2.6812  | 0.605483 | 2343 | 3.7559 | 2.1341 | -0.59517 |
| 1.488341 | 727  | 14.443  | 7.993   | 1.805514 | 959  | 5.9437 | 0.0537 | 0.013792 |
| -0.65459 | 1355 | 0.81181 | 5.63819 | -1.27402 | 1206 | 1.8242 | 4.0658 | -1.13284 |
| 0.152778 | 1461 | 4.6543  | 1.7957  | -0.40593 | 1398 | 7.7969 | 1.9069 | 0.529616 |
| -0.47302 | 864  | 0.5787  | 5.8713  | -1.32668 | 1671 | 2.5733 | 3.3167 | -0.92433 |
| -0.20048 | 2007 | 0.89686 | 5.55314 | -1.2548  | 1895 | 4.3272 | 1.5628 | -0.43615 |
| -0.75144 | 1561 | 2.4343  | 4.0157  | -0.90747 | 1702 | 6.1692 | 0.2792 | 0.076558 |
| -0.26462 | 1559 | 1.347   | 5.103   | -1.15311 | 1982 | 3.4309 | 2.4591 | -0.68563 |
| 0.893476 | 1353 | 1.4043  | 5.0457  | -1.14016 | 2224 | 14.029 | 8.139  | 2.264272 |
| -0.64156 | 1632 | 0.67402 | 5.77598 | -1.30515 | 2730 | 4.2491 | 1.6409 | -0.45789 |
| 0.022184 | 2110 | 1.5166  | 4.9334  | -1.11479 | 2994 | 5.845  | 0.045  | -0.01368 |
| 0.0138   | 1927 | 1.972   | 4.478   | -1.01191 | 2700 | 7.1111 | 1.2211 | 0.338729 |
| 0.618793 | 750  | 0.93333 | 5.51667 | -1.24656 | 455  | 18.022 | 12.132 | 3.375692 |
| 2.118578 | 2096 | 3.4828  | 2.9672  | -0.67059 | 3155 | 4.2789 | 1.6111 | -0.44959 |
| 2.296049 | 2167 | 2.8611  | 3.5889  | -0.81105 | 2429 | 10.004 | 4.114  | 1.143945 |

|          |      |         |         |          |      |         |         |          |
|----------|------|---------|---------|----------|------|---------|---------|----------|
| 2.213739 | 2031 | 2.6588  | 3.7912  | -0.85675 | 3178 | 6.4821  | 0.5921  | 0.163651 |
| 0.107982 | 2159 | 0.23159 | 6.21841 | -1.4051  | 1648 | 5.1578  | 0.7322  | -0.20496 |
| 1.432254 | 2655 | 2.1469  | 4.3031  | -0.9724  | 1684 | 3.8005  | 2.0895  | -0.58275 |
| 3.223795 | 2268 | 5.4674  | 0.9826  | -0.22224 | 3020 | 8.5762  | 2.6862  | 0.746528 |
| 2.35082  | 2438 | 1.0664  | 5.3836  | -1.2165  | 2188 | 2.6508  | 3.2392  | -0.90276 |
| 0.980498 | 2144 | 2.5653  | 3.8847  | -0.87787 | 2932 | 3.4447  | 2.4453  | -0.68179 |
| 2.402838 | 1670 | 2.2156  | 4.2344  | -0.95688 | 1407 | 2.8429  | 3.0471  | -0.84929 |
| -0.17123 | 1515 | 0.19802 | 6.25198 | -1.41268 | 2162 | 7.308   | 1.418   | 0.393534 |
| -0.76689 | 2317 | 2.2874  | 4.1626  | -0.94065 | 1206 | 9.8673  | 3.9773  | 1.105895 |
| -1.13862 | 1241 | 0.88638 | 5.56362 | -1.25717 | 921  | 4.5603  | 1.3297  | -0.37127 |
| -0.16278 | 1381 | 0.94135 | 5.50865 | -1.24475 | 1455 | 4.1924  | 1.6976  | -0.47367 |
| -0.59174 | 1224 | 0.65359 | 5.79641 | -1.30976 | 1007 | 6.6534  | 0.7634  | 0.211331 |
| -0.12463 | 2333 | 1.5431  | 4.9069  | -1.10881 | 1005 | 3.4826  | 2.4074  | -0.67124 |
| 0.806392 | 1723 | 3.5403  | 2.9097  | -0.6576  | 1004 | 4.1833  | 1.7067  | -0.4762  |
| -0.87129 | 1785 | 1.8487  | 4.6013  | -1.03977 | 1375 | 5.8909  | 0.0009  | -0.0009  |
| -1.13907 | 1172 | 0.85324 | 5.59676 | -1.26466 | 756  | 7.0106  | 1.1206  | 0.310755 |
| 0.038646 | 2428 | 0.9061  | 5.5439  | -1.25272 | 1234 | 4.9433  | 0.9467  | -0.26466 |
| -0.82925 | 1285 | 1.1673  | 5.2827  | -1.19371 | 968  | 4.5455  | 1.3445  | -0.37539 |
| 0.493615 | 1175 | 2.383   | 4.067   | -0.91906 | 380  | 8.4211  | 2.5311  | 0.703357 |
| -1.07952 | 1350 | 1.037   | 5.413   | -1.22314 | 2103 | 3.6614  | 2.2286  | -0.62147 |
| -0.75055 | 1175 | 3.234   | 3.216   | -0.7268  | 611  | 6.5466  | 0.6566  | 0.181604 |
| -0.76551 | 1301 | 0.8455  | 5.6045  | -1.26641 | 752  | 2.1277  | 3.7623  | -1.04836 |
| 1.466769 | 3230 | 5.9752  | 0.4748  | -0.10751 | 3160 | 7.7215  | 1.8315  | 0.508629 |
| 0.96119  | 1929 | 7.154   | 0.704   | 0.158798 | 1954 | 9.0072  | 3.1172  | 0.866493 |
| 0.8671   | 2707 | 3.9158  | 2.5342  | -0.57277 | 1523 | 4.2022  | 1.6878  | -0.47094 |
| 0.077475 | 2284 | 4.2032  | 2.2468  | -0.50784 | 1858 | 3.5522  | 2.3378  | -0.65186 |
| -0.79458 | 1158 | 3.3679  | 3.0821  | -0.69655 | 958  | 1.7745  | 4.1155  | -1.14667 |
| -1.00485 | 1487 | 4.573   | 1.877   | -0.4243  | 1595 | 0.81505 | 5.07495 | -1.41373 |
| 0.036994 | 1011 | 5.3412  | 1.1088  | -0.25075 | 886  | 1.0158  | 4.8742  | -1.35785 |
| -0.54135 | 2159 | 5.2802  | 1.1698  | -0.26453 | 1403 | 2.851   | 3.039   | -0.84704 |
| -0.50919 | 925  | 3.2432  | 3.2068  | -0.72472 | 436  | 4.3578  | 1.5322  | -0.42763 |
| -0.57452 | 2006 | 6.5304  | 0.0804  | 0.017915 | 1122 | 0.98039 | 4.90961 | -1.36771 |
| -0.95342 | 1114 | 5.386   | 1.064   | -0.24063 | 841  | 1.1891  | 4.7009  | -1.30961 |
| -1.11302 | 1811 | 6.7918  | 0.3418  | 0.07697  | 754  | 0.79576 | 5.09424 | -1.4191  |
| 0.031792 | 1298 | 8.2435  | 1.7935  | 0.404935 | 852  | 0.8216  | 5.0684  | -1.4119  |
| -0.62947 | 1072 | 10.541  | 4.091   | 0.923982 | 776  | 0.51546 | 5.37454 | -1.49712 |
| -0.09005 | 1012 | 11.561  | 5.111   | 1.154419 | 541  | 0.73937 | 5.15063 | -1.43479 |
| 0.732803 | 308  | 20.779  | 14.329  | 3.236931 | 392  | 2.551   | 3.339   | -0.93054 |
| -0.55487 | 1297 | 11.642  | 5.192   | 1.172718 | 1055 | 1.6114  | 4.2786  | -1.19207 |
| -0.29013 | 951  | 10.41   | 3.96    | 0.894387 | 820  | 0.4878  | 5.4022  | -1.50482 |
| -1.16219 | 883  | 10.646  | 4.196   | 0.947704 | 1153 | 0.95403 | 4.93597 | -1.37504 |
| -0.84804 | 1214 | 12.191  | 5.741   | 1.296747 | 661  | 2.5719  | 3.3181  | -0.92472 |
| -0.01255 | 228  | 17.982  | 11.532  | 2.605038 | 421  | 1.6627  | 4.2273  | -1.17779 |
| -0.82025 | 1069 | 14.312  | 7.862   | 1.775919 | 949  | 1.5806  | 4.3094  | -1.20064 |
| -0.91193 | 1026 | 11.111  | 4.661   | 1.052755 | 1306 | 0.84227 | 5.04773 | -1.40615 |
| -0.00379 | 2716 | 12.555  | 6.105   | 1.378981 | 1692 | 1.0047  | 4.8853  | -1.36094 |
| 0.461976 | 1057 | 12.867  | 6.417   | 1.449468 | 1612 | 4.0323  | 1.8577  | -0.51823 |

|          |      |        |        |          |      |         |         |          |
|----------|------|--------|--------|----------|------|---------|---------|----------|
| -0.0104  | 1778 | 6.243  | 0.207  | -0.04701 | 1072 | 3.6381  | 2.2519  | -0.62795 |
| -0.24895 | 1793 | 11.656 | 5.206  | 1.175881 | 1225 | 6.449   | 0.559   | 0.154438 |
| -0.12656 | 1173 | 7.2464 | 0.7964 | 0.179673 | 1264 | 1.7405  | 4.1495  | -1.15614 |
| -0.51727 | 1392 | 6.4655 | 0.0155 | 0.003253 | 608  | 4.2763  | 1.6137  | -0.45032 |
| -0.87934 | 1751 | 8.2239 | 1.7739 | 0.400508 | 1085 | 0.92166 | 4.96834 | -1.38405 |
| -0.72056 | 1005 | 11.343 | 4.893  | 1.105168 | 595  | 3.6975  | 2.1925  | -0.61142 |
| -0.67727 | 1314 | 8.2953 | 1.8453 | 0.416638 | 1038 | 1.1561  | 4.7339  | -1.3188  |
| 0.418067 | 582  | 22.68  | 16.23  | 3.666401 | 359  | 6.9638  | 1.0738  | 0.297729 |
| -0.92135 | 639  | 13.615 | 7.165  | 1.618454 | 484  | 3.5124  | 2.3776  | -0.66294 |
| -0.47168 | 1384 | 10.983 | 4.533  | 1.023838 | 785  | 2.8025  | 3.0875  | -0.86054 |
| -0.30084 | 820  | 16.463 | 10.013 | 2.261869 | 595  | 7.2269  | 1.3369  | 0.370961 |
| 0.63908  | 1390 | 2.3022 | 4.1478 | -0.93731 | 616  | 5.0325  | 0.8575  | -0.23983 |
| 0.511392 | 946  | 14.376 | 7.926  | 1.790378 | 685  | 7.7372  | 1.8472  | 0.512999 |
| -0.30748 | 2014 | 9.3843 | 2.9343 | 0.662663 | 2683 | 4.8453  | 1.0447  | -0.29194 |
| 0.010587 | 1304 | 16.488 | 10.038 | 2.267517 | 915  | 3.6066  | 2.2834  | -0.63672 |
| -0.29592 | 994  | 10.966 | 4.516  | 1.019997 | 599  | 3.6728  | 2.2172  | -0.6183  |
| 0.958528 | 1615 | 9.4118 | 2.9618 | 0.668876 | 1330 | 6.4662  | 0.5762  | 0.159226 |
| -0.66227 | 2311 | 9.3899 | 2.9399 | 0.663928 | 1261 | 6.1856  | 0.2956  | 0.081123 |
| 2.202112 | 1103 | 7.0716 | 0.6216 | 0.140182 | 1092 | 3.022   | 2.868   | -0.79944 |
| 0.24745  | 1722 | 7.259  | 0.809  | 0.182519 | 800  | 3       | 2.89    | -0.80556 |
| -0.2338  | 780  | 6.2821 | 0.1679 | -0.03818 | 494  | 6.4777  | 0.5877  | 0.162427 |
| 0.092775 | 706  | 9.3484 | 2.8984 | 0.654552 | 496  | 7.6613  | 1.7713  | 0.491872 |
| 2.301863 | 1195 | 13.389 | 6.939  | 1.567397 | 988  | 9.919   | 4.029   | 1.120286 |
| 1.524447 | 262  | 25.954 | 19.504 | 4.406057 | 303  | 15.842  | 9.952   | 2.768906 |
| -0.72476 | 1081 | 12.673 | 6.223  | 1.405639 | 781  | 16.645  | 10.755  | 2.992415 |
| -0.22689 | 862  | 8.3527 | 1.9027 | 0.429606 | 1096 | 6.1131  | 0.2231  | 0.060943 |
| 0.204    | 1630 | 9.7546 | 3.3046 | 0.74632  | 828  | 4.8309  | 1.0591  | -0.29595 |
| 4.477109 | 262  | 18.321 | 11.871 | 2.681625 | 230  | 23.043  | 17.153  | 4.773249 |
| 2.449041 | 648  | 14.506 | 8.056  | 1.819747 | 385  | 17.922  | 12.032  | 3.347858 |
| 1.109593 | 1305 | 13.103 | 6.653  | 1.502784 | 519  | 10.983  | 5.093   | 1.416442 |
| 2.988799 | 1002 | 10.08  | 3.63   | 0.819834 | 805  | 13.416  | 7.526   | 2.093648 |
| 2.204253 | 1252 | 10.463 | 4.013  | 0.906361 | 1996 | 20.641  | 14.751  | 4.104671 |
| 2.157744 | 904  | 11.836 | 5.386  | 1.216546 | 776  | 12.113  | 6.223   | 1.730968 |
| 1.553607 | 1488 | 4.7043 | 1.7457 | -0.39463 | 2121 | 6.3178  | 0.4278  | 0.11792  |
| 0.587399 | 1587 | 6.3642 | 0.0858 | -0.01963 | 1340 | 8.5075  | 2.6175  | 0.727406 |
| -0.09648 | 1472 | 4.4158 | 2.0342 | -0.45981 | 1229 | 9.9268  | 4.0368  | 1.122457 |
| 0.725551 | 1156 | 8.1315 | 1.6815 | 0.379633 | 1333 | 12.453  | 6.563   | 1.825605 |
| 1.1938   | 1434 | 9.6234 | 3.1734 | 0.71668  | 2595 | 5.6262  | 0.2638  | -0.07458 |
| 0.534311 | 2625 | 11.048 | 4.598  | 1.038523 | 1771 | 8.3004  | 2.4104  | 0.669761 |
| -0.23637 | 1455 | 6.6667 | 0.2167 | 0.048708 | 1565 | 8.754   | 2.864   | 0.796017 |
| -1.13718 | 452  | 5.7522 | 0.6978 | -0.15789 | 517  | 7.3501  | 1.4601  | 0.405252 |
| -1.23456 | 833  | 3.6014 | 2.8486 | -0.6438  | 649  | 9.8613  | 3.9713  | 1.104225 |
| -0.24445 | 2200 | 9.2273 | 2.7773 | 0.627194 | 1901 | 4.1557  | 1.7343  | -0.48388 |
| -0.40127 | 1472 | 6.4538 | 0.0038 | 0.00061  | 1034 | 13.056  | 7.166   | 1.993445 |
| -0.2487  | 1110 | 6.5766 | 0.1266 | 0.028353 | 912  | 11.732  | 5.842   | 1.62492  |
| -0.54123 | 870  | 12.184 | 5.734  | 1.295166 | 858  | 15.035  | 9.145   | 2.544284 |
| -0.68779 | 1004 | 1.2948 | 5.1552 | -1.1649  | 982  | 9.8778  | 3.9878  | 1.108818 |

|          |      |        |        |          |      |        |        |          |
|----------|------|--------|--------|----------|------|--------|--------|----------|
| -1.06095 | 724  | 9.3923 | 2.9423 | 0.66447  | 836  | 18.182 | 12.292 | 3.420227 |
| -0.91024 | 1502 | 3.5952 | 2.8548 | -0.6452  | 837  | 5.6153 | 0.2747 | -0.07762 |
| -0.72056 | 1005 | 3.9801 | 2.4699 | -0.55824 | 868  | 7.1429 | 1.2529 | 0.34758  |
| -0.95345 | 1596 | 5.1378 | 1.3122 | -0.2967  | 816  | 10.172 | 4.282  | 1.190706 |
| -0.80211 | 1048 | 5.2481 | 1.2019 | -0.27178 | 597  | 7.7052 | 1.8152 | 0.504092 |
| 0.27453  | 1483 | 7.35   | 0.9    | 0.203078 | 1340 | 12.015 | 6.125  | 1.703691 |
| -0.52608 | 802  | 11.97  | 5.52   | 1.246819 | 564  | 28.014 | 22.124 | 6.156888 |
| -0.71809 | 754  | 5.5703 | 0.8797 | -0.19899 | 483  | 30.642 | 24.752 | 6.888371 |
| 0.126494 | 1643 | 9.9817 | 3.5317 | 0.797626 | 1307 | 10.176 | 4.286  | 1.19182  |
| -0.53633 | 2048 | 4.248  | 2.202  | -0.49772 | 1577 | 6.9753 | 1.0853 | 0.30093  |
| -1.06555 | 1184 | 2.6182 | 3.8318 | -0.86592 | 838  | 9.0692 | 3.1792 | 0.88375  |
| 1.25772  | 1130 | 10.885 | 4.435  | 1.001698 | 1955 | 14.936 | 9.046  | 2.516728 |
| -0.57378 | 1117 | 6.7144 | 0.2644 | 0.059484 | 1276 | 4.9373 | 0.9527 | -0.26633 |
| 0.22548  | 1321 | 12.036 | 5.586  | 1.26173  | 1083 | 11.634 | 5.744  | 1.597642 |
| 0.262535 | 1397 | 6.5855 | 0.1355 | 0.030363 | 2517 | 15.852 | 9.962  | 2.77169  |
| 0.59254  | 4060 | 9.3103 | 2.8603 | 0.645945 | 3314 | 10.35  | 4.46   | 1.240251 |
| 0.084727 | 609  | 8.5386 | 2.0886 | 0.471604 | 605  | 19.339 | 13.449 | 3.742269 |
| 0.755293 | 1783 | 6.7863 | 0.3363 | 0.075728 | 1839 | 9.8967 | 4.0067 | 1.114079 |
| -0.64486 | 1371 | 4.5222 | 1.9278 | -0.43577 | 564  | 8.8652 | 2.9752 | 0.826969 |
| -0.44248 | 1742 | 2.9851 | 3.4649 | -0.78303 | 1405 | 6.121  | 0.231  | 0.063142 |
| -1.07252 | 1184 | 4.4764 | 1.9736 | -0.44612 | 849  | 7.0671 | 1.1771 | 0.326481 |
| 0.091336 | 1774 | 5.2424 | 1.2076 | -0.27307 | 1117 | 9.4897 | 3.5997 | 1.000793 |
| -0.36764 | 1278 | 5.8685 | 0.5815 | -0.13162 | 781  | 8.3227 | 2.4327 | 0.675968 |
| 0.41617  | 832  | 8.0529 | 1.6029 | 0.361876 | 384  | 23.958 | 18.068 | 5.027932 |
| 0.334747 | 1890 | 7.619  | 1.169  | 0.26385  | 961  | 11.759 | 5.869  | 1.632435 |
| 1.170361 | 1436 | 10.028 | 3.578  | 0.808086 | 1340 | 9.6269 | 3.7369 | 1.038982 |
| 0.31902  | 2280 | 8.9035 | 2.4535 | 0.554041 | 1304 | 7.362  | 1.472  | 0.408565 |
| 0.501111 | 2348 | 4.8552 | 1.5948 | -0.36054 | 1378 | 10.377 | 4.487  | 1.247766 |
| 2.876808 | 1955 | 10.691 | 4.241  | 0.95787  | 701  | 12.268 | 6.378  | 1.774111 |
| 0.834604 | 2023 | 13.89  | 7.44   | 1.680582 | 1367 | 10.022 | 4.132  | 1.148955 |
| -0.33346 | 1853 | 5.8824 | 0.5676 | -0.12848 | 1496 | 6.6176 | 0.7276 | 0.201367 |
| 3.408304 | 1606 | 10.71  | 4.26   | 0.962162 | 1106 | 11.573 | 5.683  | 1.580664 |
| 1.911732 | 2447 | 3.1876 | 3.2624 | -0.73728 | 1277 | 10.963 | 5.073  | 1.410875 |
| 0.78121  | 890  | 23.258 | 16.808 | 3.796982 | 904  | 13.274 | 7.384  | 2.054124 |
| 0.619497 | 1675 | 9.8507 | 3.4007 | 0.768031 | 2373 | 7.3746 | 1.4846 | 0.412072 |
| 0.01634  | 2760 | 5      | 1.45   | -0.32783 | 1380 | 3.8406 | 2.0494 | -0.57159 |
| -0.53682 | 1530 | 2.1569 | 4.2931 | -0.97014 | 1170 | 5.8974 | 0.0074 | 0.000905 |
| -0.58884 | 2166 | 3.6473 | 2.8027 | -0.63343 | 1609 | 4.8477 | 1.0423 | -0.29127 |
| 1.536992 | 2575 | 10.214 | 3.764  | 0.850107 | 1830 | 4.8087 | 1.0813 | -0.30213 |
| -0.94929 | 1202 | 7.4043 | 0.9543 | 0.215345 | 862  | 4.8724 | 1.0176 | -0.2844  |
| 0.031639 | 2253 | 5.2375 | 1.2125 | -0.27417 | 1174 | 4.0886 | 1.8014 | -0.50256 |
| -0.87536 | 1549 | 2.4532 | 3.9968 | -0.9032  | 1851 | 3.2415 | 2.6485 | -0.73834 |
| 1.168954 | 1783 | 6.8985 | 0.4485 | 0.101076 | 1339 | 5.2278 | 0.6622 | -0.18547 |
| 2.35541  | 1498 | 8.9453 | 2.4953 | 0.563485 | 1461 | 5.065  | 0.825  | -0.23079 |
| 0.915201 | 1365 | 6.1538 | 0.2962 | -0.06717 | 1582 | 7.4589 | 1.5689 | 0.435536 |
| -0.11961 | 1951 | 2.3578 | 4.0922 | -0.92475 | 862  | 4.1763 | 1.7137 | -0.47815 |
| 0.905256 | 1141 | 7.4496 | 0.9996 | 0.225579 | 751  | 9.5872 | 3.6972 | 1.027932 |

|          |      |        |        |          |      |        |        |          |
|----------|------|--------|--------|----------|------|--------|--------|----------|
| 0.202164 | 1156 | 8.3045 | 1.8545 | 0.418716 | 1299 | 4.7729 | 1.1171 | -0.31209 |
| 2.923624 | 1806 | 10.631 | 4.181  | 0.944315 | 1199 | 5.8382 | 0.0518 | -0.01557 |
| 0.356901 | 1013 | 6.614  | 0.164  | 0.036802 | 1095 | 2.7397 | 3.1503 | -0.87802 |
| 0.251887 | 1668 | 5.2758 | 1.1742 | -0.26552 | 1280 | 5.4688 | 0.4212 | -0.11839 |
| 0.247817 | 2109 | 6.3063 | 0.1437 | -0.03271 | 2345 | 2.6013 | 3.2887 | -0.91654 |
| 2.92699  | 1165 | 8.5837 | 2.1337 | 0.481793 | 1670 | 6.4072 | 0.5172 | 0.142803 |
| 1.660671 | 1125 | 9.7778 | 3.3278 | 0.751562 | 772  | 7.2539 | 1.3639 | 0.378476 |
| 0.47856  | 1797 | 5.3979 | 1.0521 | -0.23794 | 1379 | 1.7404 | 4.1496 | -1.15616 |
| -0.76833 | 999  | 5.6056 | 0.8444 | -0.19101 | 1579 | 10.956 | 5.066  | 1.408926 |
| -0.7101  | 1177 | 8.3263 | 1.8763 | 0.423642 | 1070 | 3.0841 | 2.8059 | -0.78216 |
| -0.23891 | 2096 | 6.9179 | 0.4679 | 0.105459 | 1236 | 9.2233 | 3.3333 | 0.926643 |
| -0.04685 | 1274 | 7.9278 | 1.4778 | 0.333613 | 1908 | 7.2851 | 1.3951 | 0.38716  |
| -1.15567 | 1565 | 3.7061 | 2.7439 | -0.62015 | 1217 | 6.2449 | 0.3549 | 0.097629 |
| -0.32441 | 809  | 8.0346 | 1.5846 | 0.357741 | 750  | 11.333 | 5.443  | 1.513861 |
| -0.14807 | 555  | 11.351 | 4.901  | 1.106976 | 251  | 23.108 | 17.218 | 4.791341 |
| -0.81322 | 1248 | 10.256 | 3.806  | 0.859596 | 936  | 7.6923 | 1.8023 | 0.500501 |
| -0.61604 | 1025 | 15.512 | 9.062  | 2.047021 | 1090 | 10.917 | 5.027  | 1.398071 |
| -0.52969 | 1830 | 7.3224 | 0.8724 | 0.196842 | 1279 | 9.6169 | 3.7269 | 1.036198 |
| -0.50763 | 1126 | 12.966 | 6.516  | 1.471833 | 524  | 15.649 | 9.759  | 2.715186 |
| -0.65912 | 610  | 11.639 | 5.189  | 1.17204  | 685  | 12.263 | 6.373  | 1.77272  |
| 0.797182 | 1846 | 15.168 | 8.718  | 1.969305 | 1775 | 10.648 | 4.758  | 1.323197 |
| -0.8     | 971  | 5.8702 | 0.5798 | -0.13124 | 397  | 8.3123 | 2.4223 | 0.673073 |
| 0.451083 | 2428 | 14.374 | 7.924  | 1.789926 | 1607 | 9.8942 | 4.0042 | 1.113383 |
| 0.143354 | 2651 | 12.41  | 5.96   | 1.346223 | 1056 | 6.0606 | 0.1706 | 0.04633  |
| -1.01712 | 1496 | 7.8877 | 1.4377 | 0.324554 | 1005 | 6.3682 | 0.4782 | 0.131948 |
| -0.51898 | 1875 | 10.88  | 4.43   | 1.000568 | 1461 | 7.8713 | 1.9813 | 0.550324 |
| -0.76512 | 2343 | 7.5544 | 1.1044 | 0.249255 | 1451 | 8.9593 | 3.0693 | 0.853161 |
| -1.08563 | 1349 | 4.3736 | 2.0764 | -0.46934 | 1339 | 3.286  | 2.604  | -0.72596 |
| -1.30887 | 1071 | 3.1746 | 3.2754 | -0.74022 | 1180 | 2.3729 | 3.5171 | -0.98011 |
| -1.29556 | 2651 | 5.1301 | 1.3199 | -0.29844 | 1722 | 2.8455 | 3.0445 | -0.84857 |
| -0.6471  | 1210 | 12.479 | 6.029  | 1.361811 | 940  | 6.4894 | 0.5994 | 0.165683 |
| -1.18866 | 1180 | 3.8983 | 2.5517 | -0.57672 | 1104 | 6.4312 | 0.5412 | 0.149484 |
| -1.16723 | 1347 | 3.1923 | 3.2577 | -0.73622 | 1702 | 1.9389 | 3.9511 | -1.10091 |
| -1.2249  | 3774 | 9.1415 | 2.6915 | 0.60781  | 1912 | 1.9874 | 3.9026 | -1.08741 |
| -0.84339 | 898  | 4.1203 | 2.3297 | -0.52657 | 781  | 4.8656 | 1.0244 | -0.28629 |
| 0.375627 | 2580 | 15.349 | 8.899  | 2.010196 | 2117 | 8.6915 | 2.8015 | 0.778621 |
| -0.71111 | 800  | 6.125  | 0.325  | -0.07367 | 1702 | 3.7603 | 2.1297 | -0.59394 |
| -1.0904  | 1515 | 5.6106 | 0.8394 | -0.18988 | 900  | 6.6667 | 0.7767 | 0.215033 |
| -1.06239 | 885  | 7.0056 | 0.5556 | 0.125272 | 983  | 7.0193 | 1.1293 | 0.313177 |
| -1.1049  | 1743 | 4.0734 | 2.3766 | -0.53717 | 1857 | 3.4464 | 2.4436 | -0.68131 |
| -0.39451 | 1251 | 9.992  | 3.542  | 0.799953 | 1210 | 14.628 | 8.738  | 2.430999 |
| -0.19978 | 2107 | 10.394 | 3.944  | 0.890772 | 1844 | 9.8156 | 3.9256 | 1.091505 |
| -0.81233 | 1491 | 9.9262 | 3.4762 | 0.785088 | 1366 | 7.3206 | 1.4306 | 0.397041 |
| -0.43147 | 1568 | 11.671 | 5.221  | 1.17927  | 1332 | 10.811 | 4.921  | 1.368567 |
| 0.16361  | 2090 | 5.9809 | 0.4691 | -0.10623 | 1305 | 13.027 | 7.137  | 1.985373 |
| -0.61735 | 1518 | 6.9829 | 0.5329 | 0.120143 | 1542 | 9.5331 | 3.6431 | 1.012873 |
| -0.67298 | 831  | 10.59  | 4.14   | 0.935052 | 935  | 12.727 | 6.837  | 1.90187  |



|                 |             |              |              |                 |            |               |              |                 |
|-----------------|-------------|--------------|--------------|-----------------|------------|---------------|--------------|-----------------|
| -0.31097        | 2037        | 6.5292       | 0.0792       | 0.017644        | 2896       | 3.2804        | 2.6096       | -0.72752        |
| -0.41262        | 851         | 1.7626       | 4.6874       | -1.05922        | 726        | 4.8209        | 1.0691       | -0.29873        |
| 0.271929        | 549         | 4.1894       | 2.2606       | -0.51096        | 345        | 8.6957        | 2.8057       | 0.77979         |
| 0.254671        | 1270        | 2.2835       | 4.1665       | -0.94154        | 1074       | 2.8864        | 3.0036       | -0.83718        |
| -0.85838        | 1142        | 2.8021       | 3.6479       | -0.82437        | 719        | 4.4506        | 1.4394       | -0.4018         |
| 0.147668        | 1426        | 10.589       | 4.139        | 0.934826        | 1492       | 5.2949        | 0.5951       | -0.1668         |
| -0.65854        | 1190        | 7.8151       | 1.3651       | 0.308152        | 1014       | 4.4379        | 1.4521       | -0.40534        |
| 0.471247        | 386         | 9.0674       | 2.6174       | 0.591069        | 350        | 14            | 8.11         | 2.2562          |
| -0.35219        | 863         | 1.6222       | 4.8278       | -1.09094        | 821        | 5.7247        | 0.1653       | -0.04717        |
| 0.549794        | 697         | 7.3171       | 0.8671       | 0.195645        | 1064       | 3.7594        | 2.1306       | -0.59419        |
| 0.064104        | 2144        | 6.1101       | 0.3399       | -0.07704        | 2853       | 6.4844        | 0.5944       | 0.164291        |
| 0.308433        | 988         | 9.0081       | 2.5581       | 0.577672        | 1133       | 5.1192        | 0.7708       | -0.2157         |
| 0.014718        | 1201        | 10.075       | 3.625        | 0.818704        | 657        | 2.8919        | 2.9981       | -0.83565        |
| <b>3.221653</b> | <b>1037</b> | <b>20.54</b> | <b>14.09</b> | <b>3.182937</b> | <b>940</b> | <b>13.298</b> | <b>7.408</b> | <b>2.060804</b> |
| 0.753396        | 1608        | 10.634       | 4.184        | 0.944993        | 1652       | 5.9927        | 0.1027       | 0.027431        |
| -0.43514        | 2224        | 3.5522       | 2.8978       | -0.65491        | 1799       | 3.1128        | 2.7772       | -0.77417        |
| 1.701826        | 1129        | 9.9203       | 3.4703       | 0.783755        | 755        | 6.3576        | 0.4676       | 0.128998        |
| 0.282852        | 1299        | 10.239       | 3.789        | 0.855755        | 1133       | 8.12          | 2.23         | 0.619548        |
| 1.307259        | 1552        | 1.7397       | 4.7103       | -1.06439        | 894        | 5.5928        | 0.2972       | -0.08388        |
| 0.596089        | 1363        | 9.4644       | 3.0144       | 0.680759        | 2798       | 10.65         | 4.76         | 1.323754        |
| 1.121251        | 1273        | 10.448       | 3.998        | 0.902972        | 1407       | 4.6198        | 1.2702       | -0.35471        |
| -0.36467        | 1796        | 5.0111       | 1.4389       | -0.32532        | 1695       | 11.268        | 5.378        | 1.495769        |
| -0.67877        | 1049        | 3.8132       | 2.6368       | -0.59595        | 1311       | 0.91533       | 4.97467      | -1.38582        |
| 0.661784        | 1380        | 3.1159       | 3.3341       | -0.75348        | 2324       | 5.1635        | 0.7265       | -0.20337        |
| -0.87187        | 907         | 7.828        | 1.378        | 0.311067        | 1106       | 7.3237        | 1.4337       | 0.397904        |
| -0.70832        | 2010        | 3.4328       | 3.0172       | -0.68189        | 2031       | 9.0596        | 3.1696       | 0.881078        |
| 0.201889        | 1513        | 4.957        | 1.493        | -0.33754        | 1078       | 6.308         | 0.418        | 0.115192        |
| 0.219697        | 2975        | 7.6639       | 1.2139       | 0.273993        | 1776       | 8.1644        | 2.2744       | 0.631906        |
| 0.348364        | 2343        | 5.0363       | 1.4137       | -0.31963        | 1563       | 6.4619        | 0.5719       | 0.158029        |
| -0.52981        | 2249        | 3.3793       | 3.0707       | -0.69398        | 1838       | 5.2775        | 0.6125       | -0.17164        |
| 2.412629        | 2702        | 9.3634       | 2.9134       | 0.657941        | 2393       | 12.16         | 6.27         | 1.74405         |
| 0.735802        | 1269        | 3.9401       | 2.5099       | -0.56728        | 1342       | 7.6006        | 1.7106       | 0.474977        |
| 1.073578        | 1983        | 4.589        | 1.861        | -0.42068        | 1913       | 3.8683        | 2.0217       | -0.56388        |
| 0.641558        | 2109        | 6.9701       | 0.5201       | 0.117251        | 1048       | 6.6794        | 0.7894       | 0.218568        |
| -0.27376        | 1493        | 5.3583       | 1.0917       | -0.24688        | 1287       | 8.547         | 2.657        | 0.7384          |
| 0.87478         | 2220        | 3.6036       | 2.8464       | -0.6433         | 1783       | 6.1133        | 0.2233       | 0.060999        |
| -0.46351        | 2327        | 4.2544       | 2.1956       | -0.49627        | 1522       | 3.2194        | 2.6706       | -0.7445         |
| 0.248215        | 2479        | 4.5986       | 1.8514       | -0.41851        | 2313       | 4.4099        | 1.4801       | -0.41313        |
| 0.487403        | 2928        | 5.7377       | 0.7123       | -0.16117        | 2763       | 6.1889        | 0.2989       | 0.082041        |
| -0.91217        | 1229        | 4.882        | 1.568        | -0.35449        | 1134       | 4.2328        | 1.6572       | -0.46242        |
| -0.10569        | 1515        | 11.683       | 5.233        | 1.181981        | 1291       | 6.1967        | 0.3067       | 0.084212        |
|                 | 1363        | 6.4511       | 2.9908       |                 | 1227       | 5.89415       | 2.4275       |                 |
|                 |             |              | 8.9724       |                 |            |               | 7.2825       |                 |
|                 |             |              | 4.426384     |                 |            |               | 3.5927       |                 |
|                 | 2262        | 36.87        | 1393         | 17.301          |            |               |              |                 |
|                 | 2517        | 33.89        | 2472         | 20.267          |            |               |              |                 |

|          |          |          |          |     |        |
|----------|----------|----------|----------|-----|--------|
| 2550     | 28.235   | 3000     | 20.167   |     |        |
| 2316     | 27.85    | 2558     | 28.694   |     |        |
| 2411.25  | 31.71125 | 2355.75  | 21.60725 |     |        |
| 143.507  | 4.410337 | 682.2426 | 4.920583 |     |        |
|          |          | 477      | 3.1447   | 274 | 16.423 |
| 436      | 10.55    | 362      | 3.8674   |     |        |
| 462      | 7.5758   |          |          | 291 | 17.526 |
| 734      | 9.5368   | 803      | 10.212   |     |        |
| 544      | 9.220867 | 547.3333 | 5.741367 |     |        |
| 165.0576 | 1.51206  | 228.7582 | 3.888508 |     |        |
|          | 13.23101 |          | 14.76175 |     |        |
|          | 4.536181 |          | 11.66552 |     |        |
|          | 17.76719 |          | 26.42727 |     |        |
|          | 22.49038 |          | 15.86588 |     |        |
|          | 0.789991 |          | 1.665667 |     |        |
|          | 0.210009 |          | -0.66567 |     |        |

x toxic a,b,c

x toxic a,b,c

x toxic a,b,c





x toxic a,b,c

x toxic a,b,c

x toxic a,b,c

x toxic a,b,c

x toxic a,b,c

x toxic a,b,c





y

|           |                               |                  | cell ct | % inf   | AD      |
|-----------|-------------------------------|------------------|---------|---------|---------|
| 50079 A02 | M-028473- hypothetical        | 340074 LOC340074 | 517     | 10.445  | 4.595   |
| 50079 A04 | M-019388- hypothetical        | 340069 LOC340069 | 553     | 11.573  | 5.723   |
| 50079 A05 | M-016883- tumor suppressor    | 286753 TUSC5     | 950     | 4.6316  | 1.2184  |
| 50079 A06 | M-024333- transmembrane       | 340061 TMEM173   | 998     | 6.3126  | 0.4626  |
| 50079 A07 | M-018918- lin-9 homolog       | 286826 LIN9      | 1466    | 8.2538  | 2.4038  |
| 50079 A08 | M-007352- solute carrier      | 340024 SLC6A19   | 1181    | 6.3506  | 0.5006  |
| 50079 A09 | M-007172- tripartite repeat   | 286827 TRIM59    | 622     | 4.5016  | 1.3484  |
| 50079 A10 | M-028274- hypothetical        | 340017 LOC340017 | 1581    | 14.864  | 9.014   |
| 50079 A11 | M-024229- casein alpha        | 286828 CSN1S2A   | 639     | 11.581  | 5.731   |
| 50079 A12 | M-028328- hypothetical        | 339988 LOC339988 | 439     | 5.2392  | 0.6108  |
| 50079 A13 | M-017749- keratin 6C          | 286887 KRT6C     | 956     | 2.9289  | 2.9211  |
| 50079 A14 | M-009115- N-acetyltransferase | 339983 NAT8L     | 1343    | 10.276  | 4.426   |
| 50079 A15 | M-007173- tripartite repeat   | 287015 TRIM42    | 1534    | 4.3677  | 1.4823  |
| 50079 A16 | M-007174- tripartite repeat   | 339976 TRIML1    | 303     | 15.842  | 9.992   |
| 50079 A17 | M-017884- Rieske (Fe-S)       | 317671 RFESD     | 1321    | 5.4504  | 0.3996  |
| 50079 A18 | M-009148- transmembrane       | 339967 TMPRSS11  | 1268    | 7.4132  | 1.5632  |
| 50079 A19 | M-015577- kelch-like 1        | 317719 KLHL10    | 1346    | 10.475  | 4.625   |
| 50079 A20 | M-019221- hypothetical        | 339965 FLJ25770  | 478     | 10.042  | 4.192   |
| 50079 A21 | M-021490- dehydrogenase       | 317749 DHRS4L2   | 248     | 22.177  | 16.327  |
| 50079 A23 | M-017911- ankyrin repeat      | 317754 ANKRD21   | 556     | 10.072  | 4.222   |
| 50079 B02 | M-019339- RNA binding         | 348093 RBPMS2    | 2224    | 5.8903  | 0.0403  |
| 50079 B04 | M-018818- hypothetical        | 348378 MGC52498  | 1861    | 6.7706  | 0.9206  |
| 50079 B05 | M-024271- hypothetical        | 340094 LOC340094 | 1079    | 4.0778  | 1.7722  |
| 50079 B06 | M-018312- CTAGE family        | 340307 CTAGE6    | 2927    | 1.2641  | 4.5859  |
| 50079 B07 | M-028501- hypothetical        | 340107 LOC340107 | 1305    | 0.38314 | 5.46686 |
| 50079 B08 | M-026465- chromosome          | 340895 C10orf112 | 1558    | 3.1451  | 2.7049  |
| 50079 B09 | M-028502- hypothetical        | 340109 LOC340109 | 1819    | 6.0473  | 0.1973  |
| 50079 B10 | M-017763- chromosome          | 352909 C19orf51  | 2135    | 4.0749  | 1.7751  |
| 50079 B11 | M-028504- hypothetical        | 340113 LOC340113 | 1674    | 9.7372  | 3.8872  |
| 50079 B12 | M-029803- chromosome          | 349633 C11orf34  | 1361    | 5.3637  | 0.4863  |
| 50079 B13 | M-010757- solute carrier      | 340146 SLC35D3   | 633     | 7.109   | 1.259   |
| 50079 B14 | M-008688- nicotinamide        | 349565 NMNAT3    | 1091    | 3.0247  | 2.8253  |
| 50079 B15 | M-027171- hypothetical        | 340156 RP11-145H | 1666    | 5.5222  | 0.3278  |
| 50079 B16 | M-022178- CXYorf1-re          | 349338 LOC349338 | 1266    | 6.3191  | 0.4691  |
| 50079 B17 | M-018462- triggering repeat   | 340205 TREML1    | 977     | 6.653   | 0.803   |
| 50079 B18 | M-031739- forkhead box        | 349334 FOXD4L4   | 1732    | 2.9446  | 2.9054  |
| 50079 B19 | M-018017- zinc finger         | 340252 ZNF680    | 1823    | 4.0592  | 1.7908  |
| 50079 B20 | M-018871- chromosome          | 349236 C9orf164  | 3742    | 5.0241  | 0.8259  |
| 50079 B21 | M-025309- chromosome          | 340277 C7orf46   | 1852    | 5.9935  | 0.1435  |
| 50079 B23 | M-028865- CTAGE family        | 340311 CTAGE4    | 2093    | 6.259   | 0.409   |
| 50079 C02 | M-009007- testis serine       | 339906 TESSP2    | 1611    | 15.953  | 10.103  |
| 50079 C04 | M-023472- hypothetical        | 339903 LOC339903 | 3231    | 10.028  | 4.178   |
| 50079 C05 | M-017933- chromosome          | 317761 C14orf39  | 4224    | 15.412  | 9.562   |
| 50079 C06 | M-023510- glutamate           | 339896 GADL1     | 2639    | 14.854  | 9.004   |
| 50079 C07 | M-019232- histone cluster     | 317772 HIST2H2AB | 1813    | 16.657  | 10.807  |
| 50079 C08 | M-028189- hypothetical        | 339894 LOC339894 | 3142    | 19.287  | 13.437  |

|           |                        |                  |      |        |        |
|-----------|------------------------|------------------|------|--------|--------|
| 50079 C09 | M-018018- DEAD (Asp-   | 317781 DDX51     | 2213 | 13.24  | 7.39   |
| 50079 C10 | M-017640- chromoson    | 339883 C3orf35   | 2111 | 14.827 | 8.977  |
| 50079 C11 | M-021942- chromoson    | 319089 C14orf25  | 1359 | 9.4923 | 3.6423 |
| 50079 C12 | M-028079- hypothetic   | 339862 LOC339862 | 1516 | 12.929 | 7.079  |
| 50079 C13 | M-018438- zygote arre  | 326340 ZAR1      | 2164 | 10.675 | 4.825  |
| t C14     | M-017970- kyphoscolio  | 339855 KY        | 1350 | 20.222 | 14.372 |
| 50079 C15 | M-031217- egf-like mo  | 326342 EMR4      | 2645 | 12.628 | 6.778  |
| 50079 C16 | M-018464- coiled-coil  | 339834 CCDC36    | 2192 | 12.774 | 6.924  |
| 50079 C17 | M-008933- RAB37, me    | 326624 RAB37     | 2226 | 4.9416 | 0.9084 |
| 50079 C18 | M-023658- coiled-coil  | 339829 CCDC39    | 2456 | 9.6906 | 3.8406 |
| 50079 C19 | M-017947- serpin pept  | 327657 SERPINA9  | 1831 | 15.62  | 9.77   |
| 50079 C20 | M-027890- hypothetic   | 339822 LOC339822 | 3072 | 5.957  | 0.107  |
| 50079 C21 | M-022600- snail homo   | 333929 SNAI3     | 845  | 12.781 | 6.931  |
| 50079 C23 | M-017914- UBA domai    | 337867 UBAC2     | 2831 | 5.5104 | 0.3396 |
| 50079 D02 | M-029304- hypothetic   | 349196 LOC349196 | 4090 | 5.0367 | 0.8133 |
| 50079 D04 | M-018870- dpy-19-like  | 349152 DPY19L2P2 | 4056 | 10.799 | 4.949  |
| 50079 D05 | M-028897- nuclear en   | 340318 LOC340318 | 3363 | 5.62   | 0.23   |
| 50079 D06 | M-018750- gap junctio  | 349149 GJE1      | 2928 | 5.0546 | 0.7954 |
| 50079 D07 | M-028923- hypothetic   | 340340 LOC340340 | 3284 | 6.6382 | 0.7882 |
| 50079 D08 | M-025374- WD repeat    | 349136 WDR86     | 4489 | 12.586 | 6.736  |
| 50079 D09 | M-018311- tetraspanir  | 340348 TSPAN33   | 3089 | 9.4529 | 3.6029 |
| 50079 D10 | M-025321- hypothetic   | 349114 LOC349114 | 3245 | 11.834 | 5.984  |
| 50079 D11 | M-025456- ATP/GTP bi   | 340351 AGBL3     | 1271 | 5.8222 | 0.0278 |
| 50079 D12 | M-018833- zinc finger  | 349075 ZNF713    | 2557 | 9.2296 | 3.3796 |
| 50079 D13 | M-025859- zinc finger  | 340385 ZNF517    | 2545 | 6.4833 | 0.6333 |
| 50079 D14 | M-024488- hypothetic   | 349035 MGC22265  | 3164 | 7.0796 | 1.2296 |
| 50079 D15 | M-025811- KIAA1875     | 340390 KIAA1875  | 3095 | 6.0743 | 0.2243 |
| 50079 D16 | M-018906- nucleoporin  | 348995 NUP43     | 2071 | 12.265 | 6.415  |
| 50079 D17 | M-017888- R-spondin    | 340419 RSPO2     | 2209 | 5.0702 | 0.7798 |
| 50079 D18 | M-024299- ichthyin pr  | 348938 ICHTHYIN  | 2803 | 6.279  | 0.429  |
| 50079 D19 | M-017866- zinc finger, | 340481 ZDHHC21   | 3593 | 5.1211 | 0.7289 |
| 50079 D20 | M-007334- solute carri | 348932 SLC6A18   | 2425 | 3.6701 | 2.1799 |
| 50079 D21 | M-026218- hypothetic   | 340508 LOC340508 | 3816 | 5.3983 | 0.4517 |
| 50079 D23 | M-029615- hypothetic   | 340515 LOC340515 | 2804 | 2.6391 | 3.2109 |
| 50079 E02 | M-023119- KIAA2012 p   | 339809 LOC339809 | 3064 | 7.8655 | 2.0155 |
| 50079 E04 | M-027850- hypothetic   | 339807 LOC339807 | 2565 | 9.4347 | 3.5847 |
| 50079 E05 | M-010966- chondroitin  | 337876 CHSY-2    | 2966 | 8.7997 | 2.9497 |
| 50079 E06 | M-027847- hypothetic   | 339803 LOC339803 | 1532 | 7.5718 | 1.7218 |
| 50079 E07 | M-017997- keratin assi | 337879 KRTAP8-1  | 3698 | 5.219  | 0.631  |
| 50079 E08 | M-027976- chromoson    | 339789 C2orf46   | 2409 | 6.3927 | 0.5427 |
| 50079 E09 | M-017999- keratin assi | 337880 KRTAP11-1 | 3273 | 2.1998 | 3.6502 |
| 50079 E10 | M-027975- hypothetic   | 339788 LOC339788 | 2766 | 4.1938 | 1.6562 |
| 50079 E11 | M-018593- keratin assi | 337882 KRTAP19-1 | 2291 | 3.9284 | 1.9216 |
| 50079 E12 | M-017703- chromoson    | 339779 C2orf53   | 2342 | 4.6968 | 1.1532 |
| 50079 E13 | M-031262- keratin assi | 337959 KRTAP13-2 | 1292 | 4.9536 | 0.8964 |
| 50079 E14 | M-019294- espin-like   | 339768 ESPNL     | 2955 | 4.5347 | 1.3153 |
| 50079 E15 | M-018680- keratin assi | 337960 KRTAP13-3 | 2565 | 4.3665 | 1.4835 |

|           |                        |                  |      |         |         |
|-----------|------------------------|------------------|------|---------|---------|
| 50079 E16 | M-022969- hypothetical | 339766 LOC339766 | 3363 | 1.5462  | 4.3038  |
| 50079 E17 | M-009143- keratin ass  | 337963 KRTAP23-1 | 2113 | 2.6503  | 3.1997  |
| 50079 E18 | M-027940- hypothetical | 339745 LOC339745 | 2543 | 2.1628  | 3.6872  |
| 50079 E19 | M-017993- keratin ass  | 337967 KRTAP6-2  | 2620 | 2.5573  | 3.2927  |
| 50079 E20 | M-022859- hypothetical | 339692 LOC339692 | 3342 | 3.7403  | 2.1097  |
| 50079 E21 | M-017979- keratin ass  | 337968 KRTAP6-3  | 4161 | 6.9214  | 1.0714  |
| 50079 E23 | M-018579- keratin ass  | 337969 KRTAP19-2 | 3047 | 0.72202 | 5.12798 |
| 50079 F02 | M-018717- hypothetical | 348840 LOC348840 | 3034 | 2.8675  | 2.9825  |
| 50079 F04 | M-018668- coiled-coil  | 348807 CCDC37    | 2280 | 3.2018  | 2.6482  |
| 50079 F05 | M-024837- retrotransp  | 340526 RGAG4     | 2617 | 5.8082  | 0.0418  |
| 50079 F06 | M-028142- hypothetical | 348801 LOC348801 | 2620 | 3.6641  | 2.1859  |
| 50079 F07 | M-024839- similar to p | 340529 RP11-493K | 2616 | 7.3012  | 1.4512  |
| 50079 F08 | M-018933- WD repeat    | 348793 WDR53     | 2608 | 8.1288  | 2.2788  |
| 50079 F09 | M-024823- KIAA2022     | 340533 KIAA2022  | 2261 | 3.7594  | 2.0906  |
| 50079 F10 | M-018690- chromosom    | 348738 C2orf48   | 3474 | 2.5619  | 3.2881  |
| 50079 F11 | M-024778- NGFRAP1-L    | 340542 NGFRAP1L  | 1449 | 4.0718  | 1.7782  |
| 50079 F12 | M-018757- hypothetical | 348654 FLJ40869  | 2878 | 11.883  | 6.033   |
| 50079 F13 | M-018899- V-set and i  | 340547 VSIG1     | 1993 | 7.5765  | 1.7265  |
| 50079 F14 | M-024639- chromosom    | 348645 C22orf34  | 3677 | 24.069  | 18.219  |
| 50079 F15 | M-009099- ubiquitin-c  | 340561 UBE2DNL   | 3450 | 4.7536  | 1.0964  |
| 50079 F16 | M-018945- family with  | 348487 FAM131C   | 2134 | 2.7179  | 3.1321  |
| 50079 F17 | M-024771- spermidine   | 340562 SATL1     | 2406 | 4.6966  | 1.1534  |
| 50079 F18 | M-022304- C219-react   | 348477 KIAA0268  | 4040 | 6.9307  | 1.0807  |
| 50079 F19 | M-024944- hypothetical | 340581 LOC340581 | 3479 | 4.599   | 1.251   |
| 50079 F20 | M-014132- zinc finger  | 348327 ZNF530    | 4334 | 5.03    | 0.82    |
| 50079 F21 | M-021418- lipoma HM    | 340596 LHFPL1    | 3719 | 3.1729  | 2.6771  |
| 50079 F23 | M-031896- similar to C | 340602 LOC340602 | 1982 | 2.9768  | 2.8732  |
| 50079 G02 | M-031497- hypothetical | 339685 LOC339685 | 2661 | 1.8414  | 4.0086  |
| 50079 G04 | M-031473- hypothetical | 339674 LOC339674 | 2139 | 2.7583  | 3.0917  |
| 50079 G05 | M-018572- keratin ass  | 337970 KRTAP19-3 | 1914 | 3.2393  | 2.6107  |
| 50079 G06 | M-018448- chromosom    | 339669 C22orf33  | 1999 | 2.4512  | 3.3988  |
| 50079 G07 | M-018564- keratin ass  | 337971 KRTAP19-4 | 1534 | 4.1069  | 1.7431  |
| 50079 G08 | M-031462- solute carri | 339665 SLC35E4   | 2021 | 3.0183  | 2.8317  |
| 50079 G09 | M-018589- keratin ass  | 337972 KRTAP19-5 | 1942 | 2.6777  | 3.1723  |
| 50079 G10 | M-024364- chromosom    | 339629 C21orf54  | 2527 | 3.0471  | 2.8029  |
| 50079 G11 | M-018598- keratin ass  | 337973 KRTAP19-6 | 1045 | 6.7943  | 0.9443  |
| 50079 G12 | M-031333- hypothetical | 339593 LOC339593 | 1799 | 5.5586  | 0.2914  |
| 50079 G13 | M-018601- keratin ass  | 337974 KRTAP19-7 | 1878 | 4.4728  | 1.3772  |
| 50079 G14 | M-031302- hypothetical | 339568 LOC339568 | 1933 | 6.208   | 0.358   |
| 50079 G15 | M-018605- keratin ass  | 337975 KRTAP20-1 | 1868 | 5.8351  | 0.0149  |
| 50079 G16 | M-027243- zinc finger  | 339559 ZNF642    | 2190 | 6.0731  | 0.2231  |
| 50079 G17 | M-018607- keratin ass  | 337976 KRTAP20-2 | 2431 | 8.2271  | 2.3771  |
| 50079 G18 | M-027464- hypothetical | 339539 LOC339539 | 1411 | 10.135  | 4.285   |
| 50079 G19 | M-018659- keratin ass  | 337977 KRTAP21-1 | 1683 | 6.2389  | 0.3889  |
| 50079 G20 | M-027622- hypothetical | 339535 LOC339535 | 2248 | 8.363   | 2.513   |
| 50079 G21 | M-018617- keratin ass  | 337978 KRTAP21-2 | 1520 | 4.6053  | 1.2447  |
| 50079 G23 | M-018663- keratin ass  | 337979 KRTAP22-1 | 3135 | 9.2185  | 3.3685  |

|           |                        |                  |      |        |        |
|-----------|------------------------|------------------|------|--------|--------|
| 50079 H02 | M-019314- selenoprot   | 348303 SELV      | 4420 | 14.344 | 8.494  |
| 50079 H04 | M-031000- hypothetical | 348262 LOC348262 | 2933 | 5.5574 | 0.2926 |
| 50079 H05 | M-019363- cytochrom    | 340665 CYP26C1   | 1321 | 1.8168 | 4.0332 |
| 50079 H06 | M-018781- family with  | 348235 FAM33A    | 2673 | 6.4347 | 0.5847 |
| 50079 H07 | M-031756- von Willebr  | 340706 VWA2      | 1985 | 1.2594 | 4.5906 |
| 50079 H08 | M-022609- hypothetical | 348180 LOC348180 | 4080 | 2.9167 | 2.9333 |
| 50079 H09 | M-027290- nanos hom    | 340719 NANOS1    | 2606 | 4.1059 | 1.7441 |
| 50079 H10 | M-018779- secretory p  | 348174 LOC348174 | 3191 | 7.3018 | 1.4518 |
| 50079 H11 | M-029973- otogelin     | 340990 OTOG      | 2786 | 3.6971 | 2.1529 |
| 50079 H12 | M-022780- hypothetical | 348162 LOC348162 | 1712 | 1.4603 | 4.3897 |
| 50079 H13 | M-018628- doublecort   | 341019 DCDC1     | 2227 | 4.7598 | 1.0902 |
| 50079 H14 | M-018702- acyl-CoA sy  | 348158 ACSM2     | 3109 | 6.6581 | 0.8081 |
| 50079 H15 | M-027244- chromosom    | 341032 C11orf53  | 1028 | 7.7821 | 1.9321 |
| 50079 H16 | M-018687- chromosom    | 348110 C15orf38  | 1973 | 1.0137 | 4.8363 |
| 50079 H17 | M-031991- membrane     | 341116 MS4A10    | 1458 | 1.5775 | 4.2725 |
| 50079 H18 | M-019312- ankyrin rep  | 348094 ANKDD1A   | 3596 | 4.5328 | 1.3172 |
| 50079 H19 | M-029943- hephaestin   | 341208 HEPHL1    | 4315 | 3.0127 | 2.8373 |
| 50079 H20 | M-018925- family with  | 348013 FAM70B    | 3043 | 3.5491 | 2.3009 |
| 50079 H21 | M-031858- ovochymas    | 341277 OVCH2     | 2977 | 2.1834 | 3.6666 |
| 50079 H23 | M-019444- ovochymas    | 341350 OVCH1     | 2365 | 3.4672 | 2.3828 |
| 50079 I02 | M-022142- hypothetical | 339531 MGC35030  | 1864 | 2.2532 | 3.5968 |
| 50079 I04 | M-022138- hypothetical | 339529 LOC339529 | 2915 | 5.8662 | 0.0162 |
| 50079 I05 | M-017762- chromosom    | 338094 C1orf179  | 3012 | 5.4117 | 0.4383 |
| 50079 I06 | M-027408- hypothetical | 339524 LOC339524 | 1428 | 8.7535 | 2.9035 |
| 50079 I07 | M-027145- S100 calciu  | 338324 S100A7A   | 2285 | 7.6586 | 1.8086 |
| 50079 I08 | M-017922- chromosom    | 339512 C1orf110  | 2363 | 3.8934 | 1.9566 |
| 50079 I09 | M-018458- high densit  | 338328 LOC338328 | 2346 | 6.5217 | 0.6717 |
| 50079 I10 | M-005972- marapsin 2   | 339501 MPN2      | 1416 | 5.2966 | 0.5534 |
| 50079 I11 | M-017844- interferon   | 338376 IFNE1     | 2556 | 7.7074 | 1.8574 |
| 50079 I12 | M-018005- zinc finger  | 339500 ZNF678    | 2050 | 8.6829 | 2.8329 |
| 50079 I13 | M-018225- RAB7B, me    | 338382 RAB7B     | 1978 | 9.6057 | 3.7557 |
| 50079 I14 | M-018021- transcriptic | 339488 TFAP2E    | 2134 | 5.8575 | 0.0075 |
| 50079 I15 | M-026726- transmembr   | 338440 TMEM16J   | 2634 | 14.275 | 8.425  |
| 50079 I16 | M-017915- zinc finger  | 339487 ZBTB8OS   | 1948 | 7.4435 | 1.5935 |
| 50079 I17 | M-009140- potassium    | 338567 KCNK18    | 2971 | 13.06  | 7.21   |
| 50079 I18 | M-032010- family with  | 339479 FAM5C     | 2994 | 7.1476 | 1.2976 |
| 50079 I19 | M-029706- hypothetical | 338588 LOC338588 | 1348 | 10.608 | 4.758  |
| 50079 I20 | M-027548- chromosom    | 339476 C1orf99   | 2691 | 8.1011 | 2.2511 |
| 50079 I21 | M-026399- ST8 alpha-f  | 338596 ST8SIA6   | 1550 | 6.5806 | 0.7306 |
| 50079 I23 | M-026458- dual specifi | 338599 DUPD1     | 2984 | 3.3847 | 2.4653 |
| 50079 J02 | M-018922- EP400 N-te   | 347918 EP400NL   | 1661 | 2.4082 | 3.4418 |
| 50079 J04 | M-018701- adhesion m   | 347902 AMIGO2    | 1989 | 8.9995 | 3.1495 |
| 50079 J05 | M-032244- synaptotag   | 341359 SYT10     | 3455 | 5.0362 | 0.8138 |
| 50079 J06 | M-018917- Parkinson c  | 347862 PDDC1     | 2315 | 4.4492 | 1.4008 |
| 50079 J07 | M-018900- ankyrin rep  | 341405 ANKRD33   | 3467 | 4.4419 | 1.4081 |
| 50079 J08 | M-012731- T-box 10     | 347853 TBX10     | 1521 | 2.8928 | 2.9572 |
| 50079 J09 | M-018845- H1 histone   | 341567 H1FNT     | 1997 | 3.355  | 2.495  |

|                  |                               |               |                |             |               |               |
|------------------|-------------------------------|---------------|----------------|-------------|---------------|---------------|
| 50079 J10        | M-018445- otopetrin 3         | 347741        | OTOP3          | 2555        | 4.775         | 1.075         |
| 50079 J11        | M-021693- FRAS1 relat         | 341640        | FREM2          | 1522        | 7.0302        | 1.1802        |
| 50079 J12        | M-006790- thioredoxir         | 347736        | TXNDC6         | 2107        | 7.7361        | 1.8861        |
| 50079 J13        | M-021702- NIMA (nevi          | 341676        | NEK5           | 2286        | 6.4304        | 0.5804        |
| 50079 J14        | M-017756- serine inco         | 347735        | SERINC2        | 1903        | 5.3074        | 0.5426        |
| 50079 J15        | M-030295- solute carri        | 341880        | SLC35F4        | 2470        | 3.9271        | 1.9229        |
| 50079 J16        | M-007543- solute carri        | 347734        | SLC35B2        | 1586        | 5.2963        | 0.5537        |
| 50079 J17        | M-027245- leucine rich        | 341883        | LRRC9          | 4688        | 3.8396        | 2.0104        |
| 50079 J18        | M-017790- tubulin, be         | 347733        | TUBB2B         | 2468        | 4.2139        | 1.6361        |
| 50079 J19        | M-019415- cytochrom           | 341947        | COX8C          | 3256        | 9.5823        | 3.7323        |
| 50079 J20        | M-008518- cation char         | 347732        | CATSPER3       | 2456        | 5.3746        | 0.4754        |
| 50079 J21        | M-018759- gliomedin           | 342035        | GLDN           | 1586        | 4.6658        | 1.1842        |
| 50079 J23        | M-018586- transmemk           | 342125        | TMC3           | 2799        | 2.5009        | 3.3491        |
| 50079 K02        | M-027486- hypothetic          | 339468        | LOC339468      | 2844        | 10.056        | 4.206         |
| 50079 K04        | M-025223- hypothetic          | 339457        | LOC339457      | 3980        | 8.0653        | 2.2153        |
| 50079 K05        | M-029976- leucine zip         | 338645        | LUZP2          | 3403        | 6.9351        | 1.0851        |
| 50079 K06        | M-017847- transmemk           | 339456        | TMEM52         | 2591        | 5.5963        | 0.2537        |
| 50079 K07        | M-027240- coiled-coil         | 338657        | CCDC84         | 2827        | 9.2678        | 3.4178        |
| 50079 K08        | M-031770- kelch-like 1        | 339451        | KLHL17         | 2235        | 6.2192        | 0.3692        |
| 50079 K09        | M-026534- hypothetic          | 338667        | LOC338667      | 2946        | 6.5852        | 0.7352        |
| 50079 K10        | M-021859- chromoson           | 339448        | C1orf174       | 1761        | 4.3157        | 1.5343        |
| 50079 K11        | M-026603- ankyrin rep         | 338692        | ANKRD13D       | 3138        | 7.9031        | 2.0531        |
| 50079 K12        | M-027459- hypothetic          | 339442        | LOC339442      | 2835        | 10.547        | 4.697         |
| 50079 K13        | M-026609- hypothetic          | 338694        | LOC338694      | 3165        | 9.5735        | 3.7235        |
| <b>50079 K14</b> | <b>M-027242- ankyrin rep</b>  | <b>339416</b> | <b>ANKRD45</b> | <b>3515</b> | <b>15.903</b> | <b>10.053</b> |
| 50079 K15        | M-018873- ankyrin rep         | 338699        | ANKRD42        | 4463        | 11.427        | 5.577         |
| 50079 K16        | M-032216- C-type lecti        | 339390        | CLEC4G         | 2528        | 6.0522        | 0.2022        |
| 50079 K17        | M-017753- beta-1,4-N-         | 338707        | B4GALNT4       | 4390        | 15.763        | 9.913         |
| 50079 K18        | M-023895- ADAMTS-lil          | 339366        | ADAMTSL5       | 3383        | 4.3748        | 1.4752        |
| 50079 K19        | M-030043- hypothetic          | 338758        | LOC338758      | 2216        | 10.83         | 4.98          |
| 50079 K20        | M-031124- nanos hom           | 339345        | NANOS2         | 4137        | 12.424        | 6.574         |
| 50079 K21        | M-018636- transmemk           | 338773        | TMEM119        | 2229        | 8.838         | 2.988         |
| 50079 K23        | M-018041- keratin 6L          | 338785        | KRT6L          | 2110        | 3.1754        | 2.6746        |
| 50079 L02        | M-017738- leucine rich        | 347731        | LRRTM3         | 2189        | 3.7917        | 2.0583        |
| 50079 L04        | M-018328- leucine rich        | 347730        | LRRTM1         | 2021        | 4.4532        | 1.3968        |
| 50079 L05        | M-030385- formin 1            | 342184        | FMN1           | 2969        | 3.5702        | 2.2798        |
| 50079 L06        | M-027356- tubulin, be         | 347688        | TUBB8          | 3027        | 3.634         | 2.216         |
| <b>50079 L07</b> | <b>M-019081- polycystic k</b> | <b>342372</b> | <b>PKD1L3</b>  | <b>2233</b> | <b>17.6</b>   | <b>11.75</b>  |
| 50079 L08        | M-031575- RAB41, me           | 347517        | RAB41          | 3973        | 9.036         | 3.186         |
| 50079 L09        | M-027246- smoothelin          | 342527        | SMTNL2         | 2838        | 2.4313        | 3.4187        |
| 50079 L10        | M-010310- diacylglyce         | 347516        | DGAT2L6        | 3481        | 12.64         | 6.79          |
| 50079 L11        | M-031849- nascent po          | 342538        | NACA2          | 2590        | 9.6911        | 3.8411        |
| 50079 L12        | M-027251- LanC lantib         | 347404        | LANCL3         | 3875        | 15.277        | 9.427         |
| 50079 L13        | M-018754- keratin 27          | 342574        | KRT27          | 2605        | 2.6871        | 3.1629        |
| 50079 L14        | M-027250- inter-alpha         | 347365        | ITIH5L         | 3366        | 9.8039        | 3.9539        |
| 50079 L15        | M-027247- FLJ43826 p          | 342666        | FLJ43826       | 2280        | 6.2281        | 0.3781        |
| 50079 L16        | M-032218- zinc finger         | 347344        | ZNF81          | 2612        | 3.5988        | 2.2512        |

|           |                          |                  |      |        |        |
|-----------|--------------------------|------------------|------|--------|--------|
| 50079 L17 | M-027277- SH3 and cy     | 342667 STAC2     | 1694 | 2.5384 | 3.3116 |
| 50079 L18 | M-010459- chromosom      | 347240 C9orf48   | 2988 | 14.424 | 8.574  |
| 50079 L19 | M-023653- hypothetic     | 342892 LOC342892 | 4129 | 8.1376 | 2.2876 |
| 50079 L20 | M-031843- RF(Arg-Phe     | 347148 P518      | 2645 | 4.7637 | 1.0863 |
| 50079 L21 | M-008085- syncollin      | 342898 SYCN      | 1653 | 14.217 | 8.367  |
| 50079 L23 | M-023737- zinc finger    | 342908 ZNF404    | 2321 | 10.513 | 4.663  |
| 50079 M02 | M-023759- hypothetic     | 339344 LOC339344 | 2604 | 1.8049 | 4.0451 |
| 50079 M04 | M-017811- zinc finger    | 339327 ZNF546    | 1332 | 3.7538 | 2.0962 |
| 50079 M05 | M-027094- hypothetic     | 338797 LOC338797 | 1663 | 4.089  | 1.761  |
| 50079 M06 | M-023851- zinc finger    | 339324 ZNF260    | 2057 | 1.7501 | 4.0999 |
| 50079 M07 | M-017777- hypothetic     | 338799 LOC338799 | 2320 | 2.6724 | 3.1776 |
| 50079 M08 | M-023650- hypothetic     | 339321 LOC339321 | 2230 | 1.9731 | 3.8769 |
| 50079 M09 | M-030046- hypothetic     | 338809 LOC338809 | 1707 | 1.8161 | 4.0339 |
| 50079 M10 | M-023641- zinc finger    | 339318 ZNF181    | 2757 | 4.2075 | 1.6425 |
| 50079 M11 | M-017751- family with    | 338811 FAM19A2   | 3082 | 4.575  | 1.275  |
| 50079 M12 | M-031078- hypothetic     | 339316 LOC339316 | 2990 | 5.1171 | 0.7329 |
| 50079 M13 | M-030126- organic ani    | 338821 LST-3TM12 | 1689 | 4.3813 | 1.4687 |
| 50079 M14 | M-018756- complexin      | 339302 CPLX4     | 3106 | 8.5641 | 2.7141 |
| 50079 M15 | M-030234- hypothetic     | 338862 LOC338862 | 3356 | 8.3731 | 2.5231 |
| 50079 M16 | M-031011- hypothetic     | 339290 LOC339290 | 3167 | 3.4417 | 2.4083 |
| 50079 M17 | M-017782- C1q and tu     | 338872 C1QTNF9   | 3364 | 3.5672 | 2.2828 |
| 50079 M18 | M-023361- hypothetic     | 339284 FLJ11822  | 3264 | 4.9326 | 0.9174 |
| 50079 M19 | M-019112- ceh-10 hon     | 338917 CHX10     | 3675 | 2.585  | 3.265  |
| 50079 M20 | M-030975- chromosom      | 339263 C17orf51  | 2377 | 2.8187 | 3.0313 |
| 50079 M21 | M-022438- WAS protei     | 339005 WHDC1L1   | 2648 | 4.2296 | 1.6204 |
| 50079 M23 | M-032043- protein exp    | 339010 POTE15    | 2944 | 2.2758 | 3.5742 |
| 50079 N02 | M-029416- FLJ43950 p     | 347127 FLJ43950  | 2787 | 2.4758 | 3.3742 |
| 50079 N04 | M-005547- G protein-c    | 347088 GPR144    | 3447 | 8.036  | 2.186  |
| 50079 N05 | M-018901- zinc finger    | 342926 ZNF677    | 3548 | 6.5953 | 0.7453 |
| 50079 N06 | M-029388- solute carri   | 347051 SLC10A5   | 4641 | 7.8647 | 2.0147 |
| 50079 N07 | M-007175- zinc finger    | 342945 ZSCAN22   | 3496 | 4.405  | 1.445  |
| 50079 N08 | M-027249- killer cell le | 346689 KLRG2     | 3591 | 4.7341 | 1.1159 |
| 50079 N09 | M-031277- nanos hom      | 342977 NANOS3    | 2254 | 4.126  | 1.724  |
| 50079 N10 | M-008440- stimulated     | 346673 STRA8     | 1507 | 2.1234 | 3.7266 |
| 50079 N11 | M-019462- retinal deg    | 343035 RD3       | 2752 | 11.483 | 5.633  |
| 50079 N12 | M-025447- hypothetic     | 346653 LOC346653 | 1832 | 7.369  | 1.519  |
| 50079 N13 | M-021570- PRAME fan      | 343068 PRAMEF5   | 2383 | 3.441  | 2.409  |
| 50079 N14 | M-004993- monoacylg      | 346606 MOGAT3    | 2780 | 4.9281 | 0.9219 |
| 50079 N15 | M-021571- PRAME fan      | 343070 PRAMEF9   | 3326 | 5.5021 | 0.3479 |
| 50079 N16 | M-028947- guanine nu     | 346562 GNAT3     | 2453 | 3.0982 | 2.7518 |
| 50079 N17 | M-021572- PRAME fan      | 343071 PRAMEF10  | 2777 | 3.673  | 2.177  |
| 50079 N18 | M-032046- hypothetic     | 346547 FLJ42291  | 2779 | 6.4052 | 0.5552 |
| 50079 N19 | M-021630- coiled-coil    | 343099 CCDC18    | 4695 | 14.846 | 8.996  |
| 50079 N20 | M-032047- septin 14      | 346288 SEPT14    | 3894 | 6.7283 | 0.8783 |
| 50079 N21 | M-027333- potassium      | 343450 KCNT2     | 3602 | 2.5264 | 3.3236 |
| 50079 N23 | M-032002- BarH-like 2    | 343472 BARHL2    | 2291 | 3.1427 | 2.7073 |
| 50079 O02 | M-023333- ADP-ribosy     | 339231 ARL16     | 1865 | 1.1796 | 4.6704 |

|           |                        |        |           |          |          |          |
|-----------|------------------------|--------|-----------|----------|----------|----------|
| 50079 O04 | M-030964- coiled-coil  | 339230 | CCDC137   | 1734     | 5.6517   | 0.1983   |
| 50079 O05 | M-030594- hypothetical | 339047 | LOC339047 | 1963     | 6.0112   | 0.1612   |
| 50079 O06 | M-030963- hypothetical | 339229 | LOC339229 | 2110     | 4.1232   | 1.7268   |
| 50079 O07 | M-018877- hypothetical | 339059 | FLJ40448  | 1869     | 4.9224   | 0.9276   |
| 50079 O08 | M-009059- ectonucleo   | 339221 | ENPP7     | 2222     | 3.6454   | 2.2046   |
| 50079 O09 | M-017909- chromosom    | 317762 | C14orf65  | 1621     | 3.0228   | 2.8272   |
| 50079 O10 | M-030913- chromosom    | 339210 | C17orf67  | 2224     | 7.2392   | 1.3892   |
| 50079 O11 | M-018875- hypothetical | 338999 | FLJ36131  | 1798     | 8.3426   | 2.4926   |
| 50079 O12 | M-017785- chromosom    | 339201 | C17orf65  | 1421     | 2.3927   | 3.4573   |
| 50079 O13 | M-018082- ATG9 autoj   | 285973 | ATG9B     | 1370     | 1.6788   | 4.1712   |
| 50079 O14 | M-018908- methyltran   | 339175 | METTL2A   | 2641     | 7.0049   | 1.1549   |
| 50079 O15 | M-019295- hypothetical | 286527 | MGC39900  | 2380     | 11.555   | 5.705    |
| 50079 O16 | M-021502- transmemk    | 339168 | TMEM95    | 1099     | 8.0983   | 2.2483   |
| 50079 O17 | M-032283- hypothetical | 286087 | LOC286087 | 2105     | 8.171    | 2.321    |
| 50079 O18 | M-027241- family with  | 339145 | FAM92B    | 2106     | 8.1671   | 2.3171   |
| 50079 O19 | M-031925- keratin assi | 388818 | KRTAP26-1 | 3168     | 6.0606   | 0.2106   |
| 50079 O20 | M-028161- RAB43, me    | 339122 | RAB43     | 1735     | 9.2219   | 3.3719   |
| 50079 O21 | M-027170- similar to P | 388968 | LOC388968 | 2676     | 3.438    | 2.412    |
| 50079 O23 | M-032080- FLJ42986 p   | 389012 | FLJ42986  | 1885     | 10.027   | 4.177    |
| 50079 P02 | M-024856- EGF-like-dc  | 346007 | EGFL11    | 1644     | 8.2117   | 2.3617   |
| 50079 P04 | M-031759- transmemk    | 345757 | TMEM157   | 1528     | 7.6571   | 1.8071   |
| 50079 P05 | M-027201- transglutar  | 343641 | TGM6      | 2405     | 17.547   | 11.697   |
| 50079 P06 | M-030868- similar to A | 345667 | LOC345667 | 1868     | 5.2463   | 0.6037   |
| 50079 P07 | M-032045- chromosom    | 343990 | C2orf55   | 2343     | 8.4507   | 2.6007   |
| 50079 P08 | M-028450- immunity-r   | 345611 | IRGM      | 2253     | 8.1669   | 2.3169   |
| 50079 P09 | M-022918- Nck-associ   | 344148 | NAP5      | 1628     | 16.83    | 10.98    |
| 50079 P10 | M-028432- BRCT doma    | 345499 | BRCTD1    | 2787     | 11.446   | 5.596    |
| 50079 P11 | M-027806- SH3 multip   | 344558 | SH3MD4    | 2298     | 10.357   | 4.507    |
| 50079 P12 | M-018524- hydroxyste   | 345275 | HSD17B13  | 2463     | 6.5773   | 0.7273   |
| 50079 P13 | M-005704- G protein-c  | 344561 | GPR148    | 1732     | 5.0808   | 0.7692   |
| 50079 P14 | M-007629- solute carri | 345274 | SLC10A6   | 3196     | 11.264   | 5.414    |
| 50079 P15 | M-009146- sterile alph | 344658 | SAMD7     | 2540     | 7.4803   | 1.6303   |
| 50079 P16 | M-027248- FLJ44691 p   | 345193 | FLJ44691  | 2307     | 9.2328   | 3.3828   |
| 50079 P17 | M-032044- arylacetam   | 344752 | AADACL2   | 2433     | 7.1928   | 1.3428   |
| 50079 P18 | M-019406- epidermis-   | 345062 | ESSPL     | 2563     | 11.627   | 5.777    |
| 50079 P19 | M-005697- G protein-c  | 344758 | GPR149    | 2286     | 5.3806   | 0.4694   |
| 50079 P20 | M-032025- osteocrin    | 344901 | OSTN      | 1489     | 9.2008   | 3.3508   |
| 50079 P21 | M-023574- transmemk    | 344805 | TMPRSS7   | 1227     | 5.1345   | 0.7155   |
| 50079 P23 | M-008055- progestin a  | 344838 | PAQR9     | 1205     | 3.5685   | 2.2815   |
|           |                        |        | MAD       | 2344.5   | 5.8463   | 2.28215  |
|           |                        |        | MAD3      |          |          | 6.84645  |
|           |                        |        | MADc      |          |          | 3.377582 |
| 50079 C22 |                        |        |           | 497      | 19.92    |          |
| 50079 D22 |                        |        |           | 2512     | 18.432   |          |
| 50079 E22 |                        | 1963   | 32.756    |          |          |          |
| 50079 F22 |                        |        |           | 2113     | 20.681   |          |
|           |                        | mn     |           | 1707.333 | 19.67767 |          |



|           |     |        |          |          |          |
|-----------|-----|--------|----------|----------|----------|
|           |     |        | sd       | 1066.996 | 1.143916 |
| 50079 G22 | 466 | 11.159 |          |          |          |
| 50079 H22 |     |        |          | 697      | 0.71736  |
| 50079 I22 | 251 | 19.124 |          |          |          |
| 50079 J22 |     |        |          | 743      | 2.961    |
|           |     |        | mn       | 720      | 1.83918  |
|           |     |        | sd       | 32.52691 | 1.586493 |
|           |     |        | 3psSD    |          | 3.431749 |
|           |     |        | 3ngSD    |          | 4.759479 |
|           |     |        | SumSD    |          | 8.191228 |
|           |     |        | MeanDf   |          | 17.83849 |
|           |     |        | SumovrMn |          | 0.459188 |
|           |     |        | 1minus   |          | 0.540812 |

| rZ       | cell ct | % inf   | AD      | rZ       | cell ct | % inf  | AD     | rZ       |
|----------|---------|---------|---------|----------|---------|--------|--------|----------|
| 1.361536 | 542     | 6.0886  | 1.4614  | -0.33106 | 974     | 6.6735 | 0.0535 | 0.012498 |
| 1.695503 | 436     | 14.22   | 6.67    | 1.516538 | 472     | 15.042 | 8.422  | 2.031599 |
| -0.35964 | 621     | 14.654  | 7.104   | 1.61515  | 824     | 5.2184 | 1.4016 | -0.33858 |
| 0.138057 | 446     | 14.35   | 6.8     | 1.546076 | 926     | 7.8834 | 1.2634 | 0.304415 |
| 0.712788 | 1078    | 8.7199  | 1.1699  | 0.266821 | 2296    | 5.0087 | 1.6113 | -0.38917 |
| 0.149308 | 768     | 11.589  | 4.039   | 0.91873  | 1404    | 4.7009 | 1.9191 | -0.46344 |
| -0.39813 | 385     | 17.143  | 9.593   | 2.180694 | 449     | 15.367 | 8.747  | 2.110013 |
| 2.669869 | 1075    | 12.186  | 4.636   | 1.054379 | 937     | 10.993 | 4.373  | 1.054681 |
| 1.697871 | 672     | 15.774  | 8.224   | 1.869634 | 777     | 7.8507 | 1.2307 | 0.296526 |
| -0.17974 | 464     | 16.164  | 8.614   | 1.958248 | 481     | 6.8607 | 0.2407 | 0.057664 |
| -0.86375 | 920     | 6.1957  | 1.3543  | -0.30672 | 510     | 7.0588 | 0.4388 | 0.105461 |
| 1.3115   | 860     | 16.977  | 9.427   | 2.142976 | 560     | 11.429 | 4.809  | 1.159876 |
| -0.43777 | 1084    | 10.886  | 3.336   | 0.758996 | 709     | 4.5134 | 2.1066 | -0.50868 |
| 2.959425 | 347     | 27.089  | 19.539  | 4.440596 | 295     | 8.8136 | 2.1936 | 0.528848 |
| -0.11721 | 1030    | 13.689  | 6.139   | 1.395886 | 1238    | 3.231  | 3.389  | -0.81809 |
| 0.463912 | 1085    | 12.811  | 5.261   | 1.196389 | 1110    | 10.631 | 4.011  | 0.96734  |
| 1.370418 | 1168    | 10.788  | 3.238   | 0.736729 | 977     | 9.1095 | 2.4895 | 0.600241 |
| 1.24222  | 383     | 18.016  | 10.466  | 2.379055 | 416     | 6.4904 | 0.1296 | -0.03168 |
| 4.835027 | 391     | 17.136  | 9.586   | 2.179103 | 489     | 5.9305 | 0.6895 | -0.16677 |
| 1.251102 | 226     | 20.354  | 12.804  | 2.910288 | 426     | 2.1127 | 4.5073 | -1.0879  |
| 0.013027 | 1763    | 0.73738 | 6.81262 | -1.54694 | 2469    | 5.3058 | 1.3142 | -0.31749 |
| 0.273657 | 1973    | 2.6863  | 4.8637  | -1.10412 | 1165    | 4.0343 | 2.5857 | -0.62427 |
| -0.5236  | 414     | 3.1401  | 4.4099  | -1.00101 | 833     | 4.6819 | 1.9381 | -0.46802 |
| -1.35665 | 3535    | 0.42433 | 7.12567 | -1.61807 | 2421    | 1.7761 | 4.8439 | -1.16912 |
| -1.61748 | 1610    | 0.68323 | 6.86677 | -1.55925 | 884     | 3.5068 | 3.1132 | -0.75154 |
| -0.79974 | 1540    | 1.3636  | 6.1864  | -1.40466 | 1364    | 1.0997 | 5.5203 | -1.33231 |
| 0.05951  | 1059    | 1.7941  | 5.7559  | -1.30684 | 799     | 7.5094 | 0.8894 | 0.214179 |
| -0.52446 | 2162    | 3.2377  | 4.3123  | -0.97883 | 2093    | 2.6756 | 3.9444 | -0.95209 |
| 1.151978 | 1190    | 2.521   | 5.029   | -1.14168 | 1705    | 6.6276 | 0.0076 | 0.001424 |
| -0.14288 | 757     | 1.4531  | 6.0969  | -1.38432 | 848     | 6.1321 | 0.4879 | -0.11813 |
| 0.373847 | 570     | 2.6316  | 4.9184  | -1.11655 | 393     | 6.6158 | 0.0042 | -0.00142 |
| -0.83539 | 492     | 5.4878  | 2.0622  | -0.46757 | 573     | 9.5986 | 2.9786 | 0.718248 |
| -0.09596 | 935     | 2.4599  | 5.0901  | -1.15556 | 1028    | 6.9066 | 0.2866 | 0.068739 |
| 0.139982 | 1158    | 5.5268  | 2.0232  | -0.45871 | 1004    | 7.4701 | 0.8501 | 0.204697 |
| 0.23884  | 325     | 3.3846  | 4.1654  | -0.94545 | 533     | 3.94   | 2.68   | -0.64702 |
| -0.85911 | 1459    | 2.0562  | 5.4938  | -1.24729 | 1797    | 5.5648 | 1.0552 | -0.255   |
| -0.52911 | 1797    | 2.1146  | 5.4354  | -1.23402 | 1446    | 4.7718 | 1.8482 | -0.44633 |
| -0.24343 | 2251    | 2.1324  | 5.4176  | -1.22997 | 1945    | 5.5013 | 1.1187 | -0.27032 |
| 0.043581 | 1647    | 2.6715  | 4.8785  | -1.10748 | 1740    | 7.8161 | 1.1961 | 0.288178 |
| 0.122188 | 1269    | 6.6194  | 0.9306  | -0.21045 | 1291    | 8.2107 | 1.5907 | 0.383384 |
| 2.992289 | 1665    | 10.33   | 2.78    | 0.632663 | 1880    | 5.3723 | 1.2477 | -0.30145 |
| 1.238075 | 1885    | 3.183   | 4.367   | -0.99126 | 1766    | 5.0396 | 1.5804 | -0.38172 |
| 2.832115 | 2196    | 3.1421  | 4.4079  | -1.00055 | 3881    | 4.2257 | 2.3943 | -0.57809 |
| 2.666908 | 1455    | 5.2921  | 2.2579  | -0.51203 | 3561    | 7.8068 | 1.1868 | 0.285934 |
| 3.200722 | 1746    | 5.6701  | 1.8799  | -0.42615 | 2400    | 4.25   | 2.37   | -0.57223 |
| 3.979385 | 1858    | 14.747  | 7.197   | 1.636282 | 3939    | 11.018 | 4.398  | 1.060713 |

|          |      |        |        |          |      |         |         |          |
|----------|------|--------|--------|----------|------|---------|---------|----------|
| 2.189051 | 1492 | 8.6461 | 1.0961 | 0.250052 | 2354 | 4.7579  | 1.8621  | -0.44969 |
| 2.658914 | 786  | 17.939 | 10.389 | 2.361559 | 1303 | 10.361  | 3.741   | 0.902196 |
| 1.07947  | 1464 | 9.7678 | 2.2178 | 0.504922 | 1461 | 3.2854  | 3.3346  | -0.80496 |
| 2.096974 | 1261 | 3.0928 | 4.4572 | -1.01175 | 2014 | 3.8232  | 2.7968  | -0.67521 |
| 1.429632 | 1548 | 13.63  | 6.08   | 1.38248  | 2338 | 3.8494  | 2.7706  | -0.66888 |
| 4.256211 | 1014 | 22.88  | 15.33  | 3.484239 | 1368 | 7.6023  | 0.9823  | 0.236593 |
| 2.007857 | 1513 | 13.153 | 5.603  | 1.274098 | 2804 | 5.3495  | 1.2705  | -0.30695 |
| 2.051083 | 1248 | 14.824 | 7.274  | 1.653777 | 1790 | 4.1341  | 2.4859  | -0.60019 |
| -0.26785 | 786  | 10.814 | 3.264  | 0.742637 | 1697 | 2.0625  | 4.5575  | -1.10002 |
| 1.138181 | 1059 | 11.898 | 4.348  | 0.98894  | 2196 | 4.918   | 1.702   | -0.41106 |
| 2.893697 | 1468 | 12.466 | 4.916  | 1.117999 | 2571 | 5.4842  | 1.1358  | -0.27445 |
| 0.032775 | 2361 | 4.7861 | 2.7639 | -0.62701 | 2663 | 3.8678  | 2.7522  | -0.66444 |
| 2.053155 | 614  | 21.336 | 13.786 | 3.133416 | 581  | 17.9    | 11.28   | 2.72116  |
| -0.09945 | 1820 | 8.8462 | 1.2962 | 0.295519 | 1206 | 5.2239  | 1.3961  | -0.33725 |
| -0.2397  | 3344 | 3.11   | 4.44   | -1.00784 | 2604 | 8.1413  | 1.5213  | 0.36664  |
| 1.466345 | 2755 | 7.7314 | 0.1814 | 0.042217 | 1859 | 14.739  | 8.119   | 1.958493 |
| -0.067   | 1659 | 2.7728 | 4.7772 | -1.08446 | 1801 | 6.1632  | 0.4568  | -0.11062 |
| -0.2344  | 1182 | 5.5838 | 1.9662 | -0.44575 | 2007 | 11.908  | 5.288   | 1.275447 |
| 0.234458 | 1290 | 9.2248 | 1.6748 | 0.381543 | 1128 | 17.287  | 10.667  | 2.573259 |
| 1.995422 | 2933 | 10.16  | 2.61   | 0.594037 | 4774 | 13.594  | 6.974   | 1.682234 |
| 1.067805 | 1636 | 6.7237 | 0.8263 | -0.18675 | 2527 | 8.8643  | 2.2443  | 0.541081 |
| 1.772777 | 4098 | 14.959 | 7.409  | 1.684452 | 3881 | 18.629  | 12.009  | 2.897049 |
| -0.00714 | 2201 | 5.8155 | 1.7345 | -0.39311 | 1729 | 7.9237  | 1.3037  | 0.314139 |
| 1.001693 | 1793 | 3.5137 | 4.0363 | -0.91612 | 1111 | 6.2106  | 0.4094  | -0.09919 |
| 0.188596 | 2412 | 1.2438 | 6.3062 | -1.43188 | 1641 | 8.897   | 2.277   | 0.548971 |
| 0.365143 | 3240 | 6.6975 | 0.8525 | -0.1927  | 2896 | 8.3218  | 1.7018  | 0.41019  |
| 0.067504 | 2334 | 11.525 | 3.975  | 0.904188 | 3233 | 8.9391  | 2.3191  | 0.559128 |
| 1.900383 | 1975 | 13.823 | 6.273  | 1.426333 | 1599 | 15.697  | 9.077   | 2.189634 |
| -0.22978 | 2008 | 9.0139 | 1.4639 | 0.333623 | 1447 | 10.85   | 4.23    | 1.020179 |
| 0.128109 | 2055 | 7.2019 | 0.3481 | -0.07809 | 2647 | 9.8602  | 3.2402  | 0.781366 |
| -0.21471 | 3081 | 5.2256 | 2.3244 | -0.52714 | 2372 | 7.1669  | 0.5469  | 0.131543 |
| -0.64431 | 2182 | 7.6535 | 0.1035 | 0.024517 | 712  | 6.882   | 0.262   | 0.062804 |
| -0.13264 | 2471 | 6.3537 | 1.1963 | -0.27082 | 2190 | 14.155  | 7.535   | 1.817589 |
| -0.94956 | 1678 | 3.6949 | 3.8551 | -0.87495 | 1348 | 4.3027  | 2.3173  | -0.55951 |
| 0.597824 | 1819 | 5.4426 | 2.1074 | -0.47784 | 1555 | 1.4791  | 5.1409  | -1.24078 |
| 1.062417 | 2423 | 3.5493 | 4.0007 | -0.90803 | 2097 | 5.4363  | 1.1837  | -0.28601 |
| 0.874413 | 1497 | 6.2792 | 1.2708 | -0.28775 | 2419 | 3.9272  | 2.6928  | -0.65011 |
| 0.510868 | 784  | 8.4184 | 0.8684 | 0.198315 | 1289 | 1.9395  | 4.6805  | -1.12969 |
| -0.18572 | 2183 | 6.3216 | 1.2284 | -0.27811 | 2859 | 0.7695  | 5.8505  | -1.41198 |
| 0.161773 | 2586 | 7.3086 | 0.2414 | -0.05385 | 2798 | 3.8242  | 2.7958  | -0.67496 |
| -1.07962 | 1981 | 4.7956 | 2.7544 | -0.62485 | 3051 | 0.55719 | 6.06281 | -1.46321 |
| -0.48926 | 1852 | 6.1555 | 1.3945 | -0.31585 | 1905 | 3.8845  | 2.7355  | -0.66042 |
| -0.56783 | 1458 | 4.4582 | 3.0918 | -0.70151 | 1864 | 1.2876  | 5.3324  | -1.28698 |
| -0.34033 | 1167 | 8.826  | 1.276  | 0.290929 | 947  | 0.1056  | 6.5144  | -1.57217 |
| -0.2643  | 582  | 6.5292 | 1.0208 | -0.23094 | 1723 | 2.0894  | 4.5306  | -1.09353 |
| -0.38833 | 1424 | 8.0056 | 0.4556 | 0.10452  | 790  | 5.1899  | 1.4301  | -0.34546 |
| -0.43812 | 2159 | 3.7981 | 3.7519 | -0.8515  | 2080 | 1.25    | 5.37    | -1.29605 |

|                 |             |               |               |                 |             |               |               |                 |
|-----------------|-------------|---------------|---------------|-----------------|-------------|---------------|---------------|-----------------|
| -1.27313        | 2759        | 6.4154        | 1.1346        | -0.2568         | 1879        | 0.42576       | 6.19424       | -1.49492        |
| -0.94624        | 2673        | 6.5844        | 0.9656        | -0.2184         | 1067        | 2.9053        | 3.7147        | -0.89667        |
| -1.09057        | 2535        | 6.0355        | 1.5145        | -0.34312        | 2681        | 1.5666        | 5.0534        | -1.21966        |
| -0.97377        | 2100        | 3.5714        | 3.9786        | -0.90301        | 1353        | 2.1434        | 4.4766        | -1.0805         |
| -0.62352        | 2932        | 6.6508        | 0.8992        | -0.20331        | 2128        | 1.7387        | 4.8813        | -1.17814        |
| 0.318305        | 3023        | 5.4251        | 2.1249        | -0.48181        | 2864        | 6.4944        | 0.1256        | -0.03071        |
| -1.51714        | 2076        | 2.2158        | 5.3342        | -1.21102        | 1869        | 2.6752        | 3.9448        | -0.95219        |
| -0.88193        | 2648        | 3.3233        | 4.2267        | -0.95938        | 2581        | 5.8892        | 0.7308        | -0.17673        |
| -0.78296        | 2074        | 7.8592        | 0.3092        | 0.071255        | 1966        | 5.3917        | 1.2283        | -0.29677        |
| -0.01128        | 3145        | 8.8712        | 1.3212        | 0.301199        | 3078        | 6.1404        | 0.4796        | -0.11613        |
| -0.64608        | 2276        | 6.5905        | 0.9595        | -0.21702        | 1971        | 6.6464        | 0.0264        | 0.005959        |
| 0.430752        | 2586        | 11.524        | 3.974         | 0.903961        | 1909        | 7.7528        | 1.1328        | 0.272905        |
| 0.675779        | 1954        | 8.8025        | 1.2525        | 0.285589        | 2150        | 6.093         | 0.527         | -0.12756        |
| -0.61787        | 1330        | 6.6917        | 0.8583        | -0.19402        | 1405        | 3.9146        | 2.7054        | -0.65315        |
| -0.97241        | 2103        | 7.1327        | 0.4173        | -0.09382        | 1903        | 7.0415        | 0.4215        | 0.101287        |
| -0.52538        | 1491        | 7.2435        | 0.3065        | -0.06864        | 1473        | 5.3632        | 1.2568        | -0.30364        |
| 1.787285        | 2230        | 10.628        | 3.078         | 0.700374        | 2262        | 5.7029        | 0.9171        | -0.22168        |
| 0.51226         | 1549        | 11.879        | 4.329         | 0.984623        | 819         | 8.7912        | 2.1712        | 0.523444        |
| <b>5.395191</b> | <b>3033</b> | <b>19.651</b> | <b>12.101</b> | <b>2.750555</b> | <b>2204</b> | <b>8.3031</b> | <b>1.6831</b> | <b>0.405678</b> |
| -0.32352        | 2360        | 9.4492        | 1.8992        | 0.432531        | 2404        | 2.5374        | 4.0826        | -0.98544        |
| -0.92622        | 1778        | 5.8493        | 1.7007        | -0.38543        | 1360        | 3.5294        | 3.0906        | -0.74609        |
| -0.34039        | 1622        | 3.2676        | 4.2824        | -0.97204        | 887         | 4.8478        | 1.7722        | -0.428          |
| 0.321058        | 2446        | 6.5822        | 0.9678        | -0.2189         | 2299        | 5.8286        | 0.7914        | -0.19135        |
| -0.36929        | 3064        | 8.8773        | 1.3273        | 0.302585        | 2237        | 7.1077        | 0.4877        | 0.117259        |
| -0.24168        | 3310        | 7.9456        | 0.3956        | 0.090887        | 2986        | 6.7314        | 0.1114        | 0.026468        |
| -0.79151        | 3993        | 10.343        | 2.793         | 0.635617        | 3863        | 9.9663        | 3.3463        | 0.806965        |
| -0.84957        | 1748        | 6.0069        | 1.5431        | -0.34962        | 1507        | 4.8441        | 1.7759        | -0.42889        |
| -1.18573        | 1731        | 5.9503        | 1.5997        | -0.36248        | 2980        | 2.3154        | 4.3046        | -1.039          |
| -0.91426        | 1517        | 8.1081        | 0.5581        | 0.12781         | 2163        | 4.577         | 2.043         | -0.49333        |
| -0.77185        | 1149        | 13.142        | 5.592         | 1.271598        | 1172        | 6.8259        | 0.2059        | 0.049268        |
| -1.00519        | 1758        | 6.0865        | 1.4635        | -0.33153        | 1578        | 2.6616        | 3.9584        | -0.95547        |
| -0.51498        | 770         | 15.844        | 8.294         | 1.885539        | 1250        | 2             | 4.62          | -1.1151         |
| -0.83729        | 1931        | 7.6126        | 0.0626        | 0.015224        | 2471        | 2.9947        | 3.6253        | -0.8751         |
| -0.93813        | 1912        | 4.1841        | 3.3659        | -0.76379        | 2027        | 3.0587        | 3.5613        | -0.85966        |
| -0.82876        | 2306        | 12.056        | 4.506         | 1.02484         | 2028        | 6.0651        | 0.5549        | -0.13429        |
| 0.280674        | 900         | 13.444        | 5.894         | 1.340218        | 1477        | 8.5985        | 1.9785        | 0.47695         |
| -0.08518        | 1210        | 16.529        | 8.979         | 2.041183        | 1793        | 7.2504        | 0.6304        | 0.151689        |
| -0.40665        | 2088        | 14.128        | 6.578         | 1.495634        | 1095        | 7.2146        | 0.5946        | 0.143051        |
| 0.107088        | 1244        | 7.8778        | 0.3278        | 0.075482        | 1679        | 6.5515        | 0.0685        | -0.01694        |
| -0.00332        | 1243        | 6.9187        | 0.6313        | -0.14244        | 701         | 9.7004        | 3.0804        | 0.74281         |
| 0.067149        | 1927        | 10.742        | 3.192         | 0.726277        | 1864        | 5.5258        | 1.0942        | -0.26441        |
| 0.704883        | 1660        | 5.241         | 2.309         | -0.52364        | 1591        | 9.1766        | 2.5566        | 0.616431        |
| 1.269755        | 707         | 11.598        | 4.048         | 0.920775        | 1008        | 8.5317        | 1.9117        | 0.460833        |
| 0.116237        | 936         | 7.4786        | 0.0714        | -0.01522        | 805         | 5.5901        | 1.0299        | -0.2489         |
| 0.745119        | 951         | 6.4143        | 1.1357        | -0.25705        | 600         | 11            | 4.38          | 1.05637         |
| -0.36742        | 1448        | 2.4862        | 5.0638        | -1.14958        | 1611        | 5.7107        | 0.9093        | -0.2198         |
| 0.998407        | 2042        | 6.3663        | 1.1837        | -0.26796        | 1770        | 14.972        | 8.352         | 2.01471         |

|                 |             |               |              |                 |            |               |               |                 |
|-----------------|-------------|---------------|--------------|-----------------|------------|---------------|---------------|-----------------|
| 2.515912        | 1791        | 7.426         | 0.124        | -0.02718        | 1749       | 2.7444        | 3.8756        | -0.93549        |
| -0.08553        | 2414        | 13.795        | 6.245        | 1.419971        | 2130       | 7.9343        | 1.3143        | 0.316696        |
| -1.19301        | 1318        | 10.243        | 2.693        | 0.612896        | 1580       | 6.7089        | 0.0889        | 0.021039        |
| 0.174207        | 1856        | 14.978        | 7.428        | 1.688769        | 1355       | 8.6347        | 2.0147        | 0.485684        |
| -1.35804        | 918         | 7.2985        | 0.2515       | -0.05615        | 1001       | 9.0909        | 2.4709        | 0.595754        |
| -0.86737        | 3654        | 4.7619        | 2.7881       | -0.6325         | 1263       | 4.2755        | 2.3445        | -0.56608        |
| -0.51528        | 1887        | 4.1865        | 3.3635       | -0.76325        | 1187       | 9.604         | 2.984         | 0.719551        |
| 0.43093         | 1859        | 8.3378        | 0.7878       | 0.180001        | 2273       | 7.919         | 1.299         | 0.313005        |
| -0.63631        | 1477        | 8.3277        | 0.7777       | 0.177707        | 994        | 8.7525        | 2.1325        | 0.514107        |
| -1.29856        | 1879        | 7.3443        | 0.2057       | -0.04574        | 504        | 7.5397        | 0.9197        | 0.221489        |
| -0.32168        | 1373        | 10.051        | 2.501        | 0.56927         | 952        | 7.2479        | 0.6279        | 0.151086        |
| 0.240349        | 1698        | 10.483        | 2.933        | 0.667428        | 2010       | 16.169        | 9.549         | 2.303515        |
| 0.573132        | 666         | 7.0571        | 0.4929       | -0.111          | 648        | 13.426        | 6.806         | 1.6417          |
| -1.43079        | 1471        | 5.0306        | 2.5194       | -0.57145        | 971        | 8.1359        | 1.5159        | 0.365337        |
| -1.26386        | 887         | 5.5242        | 2.0258       | -0.4593         | 864        | 7.9861        | 1.3661        | 0.329194        |
| -0.38889        | 1306        | 15.391        | 7.841        | 1.78261         | 1462       | 8.7551        | 2.1351        | 0.514734        |
| -0.83894        | 2339        | 9.4912        | 1.9412       | 0.442074        | 1799       | 12.34         | 5.72          | 1.379677        |
| -0.68013        | 1439        | 4.1001        | 3.4499       | -0.78288        | 1064       | 11.184        | 4.564         | 1.100764        |
| -1.08447        | 3082        | 8.1116        | 0.5616       | 0.128605        | 2671       | 6.4021        | 0.2179        | -0.05298        |
| -0.70438        | 1224        | 4.4935        | 3.0565       | -0.69349        | 1061       | 7.1631        | 0.5431        | 0.130626        |
| -1.06381        | 1206        | 1.9071        | 5.6429       | -1.28116        | 1623       | 2.711         | 3.909         | -0.94355        |
| 0.005892        | 2584        | 10.178        | 2.628        | 0.598126        | 2891       | 9.1318        | 2.5118        | 0.605622        |
| -0.12867        | 943         | 6.2566        | 1.2934       | -0.29288        | 1630       | 11.902        | 5.282         | 1.273999        |
| 0.860734        | 723         | 6.9156        | 0.6344       | -0.14315        | 429        | 17.949        | 11.329        | 2.732983        |
| 0.536567        | 659         | 9.8634        | 2.3134       | 0.526644        | 488        | 19.672        | 13.052        | 3.148698        |
| -0.57819        | 1251        | 8.3933        | 0.8433       | 0.192612        | 1347       | 2.8211        | 3.7989        | -0.91699        |
| 0.199966        | 1948        | 4.6715        | 2.8785       | -0.65304        | 1296       | 6.713         | 0.093         | 0.022028        |
| -0.16275        | 725         | 5.931         | 1.619        | -0.36686        | 1088       | 8.2721        | 1.6521        | 0.398199        |
| 0.551015        | 979         | 10.93         | 3.38         | 0.768994        | 1567       | 10.976        | 4.356         | 1.050579        |
| 0.839832        | 1310        | 13.817        | 6.267        | 1.42497         | 1147       | 14.124        | 7.504         | 1.81011         |
| 1.113045        | 650         | 12.308        | 4.758        | 1.082099        | 528        | 8.5227        | 1.9027        | 0.458662        |
| 0.003316        | 1957        | 4.0879        | 3.4621       | -0.78565        | 1189       | 9.7561        | 3.1361        | 0.756249        |
| <b>2.495483</b> | <b>1535</b> | <b>13.355</b> | <b>5.805</b> | <b>1.319995</b> | <b>943</b> | <b>18.134</b> | <b>11.514</b> | <b>2.777618</b> |
| 0.472883        | 1677        | 13.536        | 5.986        | 1.361122        | 1534       | 10.235        | 3.615         | 0.871795        |
| 2.135759        | 1104        | 6.7029        | 0.8471       | -0.19148        | 461        | 16.703        | 10.083        | 2.432355        |
| 0.385276        | 2175        | 3.3563        | 4.1937       | -0.95188        | 1449       | 9.5928        | 2.9728        | 0.716849        |
| 1.409796        | 749         | 7.8772        | 0.3272       | 0.075345        | 322        | 17.081        | 10.461        | 2.523557        |
| 0.667578        | 2790        | 8.9606        | 1.4106       | 0.321512        | 1813       | 8.9906        | 2.3706        | 0.571554        |
| 0.217404        | 1234        | 3.8898        | 3.6602       | -0.83066        | 421        | 13.539        | 6.919         | 1.668964        |
| -0.72881        | 3275        | 2.4427        | 5.1073       | -1.15947        | 1152       | 8.3333        | 1.7133        | 0.412965        |
| -1.01792        | 1018        | 4.5187        | 3.0313       | -0.68776        | 1288       | 3.5714        | 3.0486        | -0.73596        |
| 0.933567        | 1823        | 10.093        | 2.543        | 0.578813        | 1985       | 9.7733        | 3.1533        | 0.760399        |
| -0.23985        | 1191        | 9.5718        | 2.0218       | 0.460387        | 2063       | 7.0286        | 0.4086        | 0.098174        |
| -0.41364        | 1192        | 9.6477        | 2.0977       | 0.477633        | 912        | 6.5789        | 0.0411        | -0.01033        |
| -0.4158         | 1558        | 6.9961        | 0.5539       | -0.12486        | 1253       | 5.1077        | 1.5123        | -0.36529        |
| -0.87444        | 1640        | 9.1463        | 1.5963       | 0.363707        | 628        | 10.032        | 3.412         | 0.822817        |
| -0.7376         | 2437        | 4.0624        | 3.4876       | -0.79144        | 1018       | 11.002        | 4.382         | 1.056852        |

|                 |             |               |               |                 |             |               |               |                 |
|-----------------|-------------|---------------|---------------|-----------------|-------------|---------------|---------------|-----------------|
| -0.31718        | 2369        | 7.0072        | 0.5428        | -0.12233        | 1507        | 6.5693        | 0.0507        | -0.01264        |
| 0.350517        | 1354        | 20.679        | 13.129        | 2.984134        | 893         | 15.342        | 8.722         | 2.103981        |
| 0.559513        | 1928        | 14.73         | 7.18          | 1.632419        | 1105        | 11.131        | 4.511         | 1.087977        |
| 0.172934        | 1037        | 11.572        | 4.022         | 0.914867        | 350         | 7.7143        | 1.0943        | 0.263616        |
| -0.15955        | 1733        | 7.79          | 0.24          | 0.055532        | 1256        | 7.0064        | 0.3864        | 0.092818        |
| -0.56822        | 2153        | 5.5272        | 2.0228        | -0.45862        | 879         | 6.1433        | 0.4767        | -0.11543        |
| -0.16284        | 978         | 7.6687        | 0.1187        | 0.02797         | 495         | 7.2727        | 0.6527        | 0.157069        |
| -0.59412        | 3437        | 4.8589        | 2.6911        | -0.61046        | 1621        | 3.2696        | 3.3504        | -0.80877        |
| -0.4833         | 1625        | 6.7077        | 0.8423        | -0.19039        | 736         | 9.6467        | 3.0267        | 0.729854        |
| 1.106117        | 1945        | 12.751        | 5.201         | 1.182756        | 1193        | 10.981        | 4.361         | 1.051786        |
| -0.13966        | 2694        | 8.5375        | 0.9875        | 0.225377        | 370         | 5.6757        | 0.9443        | -0.22825        |
| -0.34951        | 1136        | 10.035        | 2.485         | 0.565634        | 360         | 13.611        | 6.991         | 1.686336        |
| -0.99047        | 1590        | 3.8994        | 3.6506        | -0.82848        | 834         | 4.9161        | 1.7039        | -0.41152        |
| 1.246365        | 2371        | 9.6162        | 2.0662        | 0.470476        | 2148        | 6.8901        | 0.2701        | 0.064758        |
| 0.656979        | 2490        | 5.4618        | 2.0882        | -0.47348        | 1520        | 4.6711        | 1.9489        | -0.47063        |
| 0.322361        | 3752        | 15.485        | 7.935         | 1.803968        | 2363        | 6.4325        | 0.1875        | -0.04565        |
| -0.07402        | 2371        | 5.3986        | 2.1514        | -0.48784        | 1532        | 3.6554        | 2.9646        | -0.71569        |
| 1.013003        | 1220        | 7.7869        | 0.2369        | 0.054828        | 441         | 14.966        | 8.346         | 2.013262        |
| 0.110404        | 2188        | 6.9927        | 0.5573        | -0.12563        | 970         | 3.5052        | 3.1148        | -0.75193        |
| 0.218766        | 2695        | 9.4991        | 1.9491        | 0.443869        | 1755        | 7.1225        | 0.5025        | 0.12083         |
| -0.45316        | 1791        | 6.9235        | 0.6265        | -0.14135        | 1569        | 6.1823        | 0.4377        | -0.10602        |
| 0.608956        | 2045        | 6.0636        | 1.4864        | -0.33674        | 1082        | 5.6377        | 0.9823        | -0.23741        |
| 1.391735        | 1655        | 9.0634        | 1.5134        | 0.34487         | 1549        | 8.0697        | 1.4497        | 0.349365        |
| 1.103511        | 1755        | 10.94         | 3.39          | 0.771266        | 923         | 11.809        | 5.189         | 1.25156         |
| <b>2.977485</b> | <b>3025</b> | <b>17.322</b> | <b>9.772</b>  | <b>2.221366</b> | <b>2114</b> | <b>10.927</b> | <b>4.307</b>  | <b>1.038757</b> |
| 1.652277        | 1950        | 12.103        | 4.553         | 1.035519        | 1349        | 4.8184        | 1.8016        | -0.43509        |
| 0.060961        | 1813        | 15.665        | 8.115         | 1.844867        | 1575        | 11.429        | 4.809         | 1.159876        |
| 2.936035        | 2273        | 11.791        | 4.241         | 0.964628        | 1524        | 10.892        | 4.272         | 1.030312        |
| -0.43567        | 2388        | 7.1189        | 0.4311        | -0.09695        | 1368        | 8.5526        | 1.9326        | 0.465876        |
| 1.475523        | 1806        | 20.432        | 12.882        | 2.928011        | 1897        | 17.765        | 11.145        | 2.688588        |
| 1.947458        | 3975        | 17.66         | 10.11         | 2.298165        | 3359        | 14.111        | 7.491         | 1.806973        |
| 0.885752        | 1573        | 16.275        | 8.725         | 1.983469        | 1617        | 14.348        | 7.728         | 1.864155        |
| -0.79077        | 1634        | 9.4247        | 1.8747        | 0.426964        | 1421        | 10.274        | 3.654         | 0.881205        |
| -0.6083         | 1788        | 8.3333        | 0.7833        | 0.178979        | 1981        | 1.4134        | 5.2066        | -1.25663        |
| -0.41245        | 953         | 1.6789        | 5.8711        | -1.33301        | 1511        | 1.5884        | 5.0316        | -1.2144         |
| -0.67388        | 2041        | 5.8795        | 1.6705        | -0.37857        | 2078        | 2.358         | 4.262         | -1.02872        |
| -0.655          | 2556        | 2.543         | 5.007         | -1.13668        | 1217        | 0.98603       | 5.63397       | -1.35974        |
| <b>3.479916</b> | <b>1180</b> | <b>20.085</b> | <b>12.535</b> | <b>2.849167</b> | <b>695</b>  | <b>2.7338</b> | <b>3.8862</b> | <b>-0.93805</b> |
| 0.944374        | 3272        | 11.461        | 3.911         | 0.889646        | 1619        | 2.1001        | 4.5199        | -1.09094        |
| -1.01108        | 2292        | 7.2426        | 0.3074        | -0.06885        | 1089        | 1.4692        | 5.1508        | -1.24316        |
| 2.011409        | 2859        | 24.869        | 17.319        | 3.936174        | 2095        | 11.456        | 4.836         | 1.166391        |
| 1.138329        | 3099        | 17.877        | 10.327        | 2.347471        | 2605        | 5.7582        | 0.8618        | -0.20834        |
| 2.792145        | 1858        | 10.28         | 2.73          | 0.621303        | 1378        | 3.8462        | 2.7738        | -0.66966        |
| -0.93534        | 1276        | 5.2508        | 2.2992        | -0.52142        | 1517        | 2.1753        | 4.4447        | -1.0728         |
| 1.171726        | 3145        | 24.356        | 16.806        | 3.819611        | 1820        | 5.7692        | 0.8508        | -0.20569        |
| 0.113039        | 2415        | 27.246        | 19.696        | 4.476269        | 808         | 9.0347        | 2.4147        | 0.582194        |
| -0.66542        | 1771        | 8.3004        | 0.7504        | 0.171504        | 1118        | 2.8623        | 3.7577        | -0.90705        |

|          |      |         |         |          |      |         |         |          |
|----------|------|---------|---------|----------|------|---------|---------|----------|
| -0.97937 | 1315 | 12.776  | 5.226   | 1.188437 | 1016 | 2.8543  | 3.7657  | -0.90898 |
| 2.539598 | 1367 | 12.143  | 4.593   | 1.044608 | 1505 | 3.3223  | 3.2977  | -0.79606 |
| 0.678385 | 4394 | 16.158  | 8.608   | 1.956885 | 3748 | 6.3234  | 0.2966  | -0.07197 |
| -0.32053 | 1816 | 9.0859  | 1.5359  | 0.349983 | 1601 | 1.4366  | 5.1834  | -1.25103 |
| 2.478311 | 1872 | 22.489  | 14.939  | 3.395397 | 2017 | 7.3872  | 0.7672  | 0.184695 |
| 1.381669 | 2300 | 17.913  | 10.363  | 2.355651 | 1893 | 5.1241  | 1.4959  | -0.36133 |
| -1.19654 | 2134 | 5.5764  | 1.9736  | -0.44744 | 2015 | 1.1414  | 5.4786  | -1.32225 |
| -0.61953 | 1987 | 10.367  | 2.817   | 0.641071 | 1309 | 0.68755 | 5.93245 | -1.43176 |
| -0.52028 | 1993 | 10.788  | 3.238   | 0.736729 | 1129 | 1.24    | 5.38    | -1.29846 |
| -1.21276 | 1772 | 9.2551  | 1.7051  | 0.388428 | 1010 | 0.29703 | 6.32297 | -1.52598 |
| -0.9397  | 1021 | 9.1087  | 1.5587  | 0.355163 | 1407 | 1.7058  | 4.9142  | -1.18608 |
| -1.14674 | 2271 | 8.4104  | 0.8604  | 0.196497 | 1090 | 0.45872 | 6.16128 | -1.48697 |
| -1.19322 | 1594 | 15.37   | 7.82    | 1.777838 | 1082 | 0.83179 | 5.78821 | -1.39695 |
| -0.4852  | 2277 | 6.1924  | 1.3576  | -0.30747 | 752  | 0.53191 | 6.08809 | -1.46931 |
| -0.37639 | 3487 | 8.546   | 0.996   | 0.227308 | 877  | 1.4823  | 5.1377  | -1.24    |
| -0.21589 | 2006 | 14.008  | 6.458   | 1.468368 | 2192 | 2.8741  | 3.7459  | -0.9042  |
| -0.43374 | 2142 | 12.979  | 5.429   | 1.234562 | 636  | 1.1006  | 5.5194  | -1.3321  |
| 0.804658 | 2573 | 12.748  | 5.198   | 1.182075 | 667  | 1.3493  | 5.2707  | -1.27209 |
| 0.748109 | 3628 | 17.999  | 10.449  | 2.375192 | 1402 | 3.6377  | 2.9823  | -0.71996 |
| -0.71193 | 2571 | 2.3726  | 5.1774  | -1.17539 | 1295 | 1.39    | 5.23    | -1.26227 |
| -0.67477 | 3417 | 6.4969  | 1.0531  | -0.23828 | 878  | 1.5945  | 5.0255  | -1.21293 |
| -0.27052 | 2835 | 5.1499  | 2.4001  | -0.54434 | 1651 | 3.0285  | 3.5915  | -0.86695 |
| -0.96557 | 2537 | 5.7942  | 1.7558  | -0.39795 | 1111 | 1.1701  | 5.4499  | -1.31533 |
| -0.89638 | 2325 | 4.5591  | 2.9909  | -0.67858 | 1240 | 0.56452 | 6.05548 | -1.46144 |
| -0.47866 | 2177 | 4.5935  | 2.9565  | -0.67077 | 1162 | 3.2702  | 3.3498  | -0.80863 |
| -1.05712 | 2015 | 7.6923  | 0.1423  | 0.033333 | 2013 | 3.3284  | 3.2916  | -0.79459 |
| -0.9979  | 2500 | 10.88   | 3.33    | 0.757633 | 2197 | 1.8662  | 4.7538  | -1.14738 |
| 0.648304 | 3206 | 9.2639  | 1.7139  | 0.390427 | 1476 | 1.2873  | 5.3327  | -1.28705 |
| 0.221756 | 2266 | 5.075   | 2.475   | -0.56136 | 1898 | 1.7914  | 4.8286  | -1.16543 |
| 0.597587 | 2775 | 8.7568  | 1.2068  | 0.275205 | 2213 | 3.1631  | 3.4569  | -0.83447 |
| -0.42673 | 3333 | 7.2007  | 0.3493  | -0.07837 | 2822 | 7.2289  | 0.6089  | 0.146502 |
| -0.32929 | 4627 | 7.0672  | 0.4828  | -0.1087  | 3136 | 5.5804  | 1.0396  | -0.25124 |
| -0.50933 | 2747 | 4.4048  | 3.1452  | -0.71364 | 1610 | 1.7391  | 4.8809  | -1.17804 |
| -1.10224 | 974  | 10.678  | 3.128   | 0.711735 | 861  | 4.6458  | 1.9742  | -0.47673 |
| 1.668857 | 1779 | 6.0146  | 1.5354  | -0.34787 | 2035 | 4.2752  | 2.3448  | -0.56615 |
| 0.450825 | 1383 | 8.4599  | 0.9099  | 0.207745 | 905  | 3.0939  | 3.5261  | -0.85117 |
| -0.71214 | 2234 | 5.6849  | 1.8651  | -0.42278 | 1483 | 4.1807  | 2.4393  | -0.58895 |
| -0.27185 | 3454 | 13.434  | 5.884   | 1.337946 | 2226 | 4.5373  | 2.0827  | -0.50291 |
| -0.10191 | 4195 | 7.056   | 0.494   | -0.11125 | 2081 | 2.5469  | 4.0731  | -0.98314 |
| -0.81363 | 2937 | 3.4048  | 4.1452  | -0.94086 | 1725 | 3.8261  | 2.7939  | -0.67451 |
| -0.64345 | 1866 | 5.4126  | 2.1374  | -0.48465 | 1643 | 3.4693  | 3.1507  | -0.76059 |
| 0.165473 | 2245 | 4.9443  | 2.6057  | -0.59106 | 1634 | 4.7124  | 1.9076  | -0.46066 |
| 2.664539 | 3179 | 12.583  | 5.033   | 1.144584 | 1543 | 13.351  | 6.731   | 1.623605 |
| 0.261134 | 2598 | 5.2733  | 2.2767  | -0.51631 | 1591 | 9.5537  | 2.9337  | 0.707415 |
| -0.98292 | 2838 | 3.8055  | 3.7445  | -0.84981 | 2858 | 4.0938  | 2.5262  | -0.60992 |
| -0.80045 | 2902 | 6.8918  | 0.6582  | -0.14855 | 2680 | 4.5896  | 2.0304  | -0.49029 |
| -1.38167 | 1314 | 0.91324 | 6.63676 | -1.50699 | 998  | 10.321  | 3.701   | 0.892545 |

|                 |             |              |              |                 |             |               |               |                 |
|-----------------|-------------|--------------|--------------|-----------------|-------------|---------------|---------------|-----------------|
| -0.05762        | 2077        | 3.6591       | 3.8909       | -0.88308        | 2628        | 7.5723        | 0.9523        | 0.229355        |
| 0.048822        | 2091        | 1.5304       | 6.0196       | -1.36676        | 1738        | 7.6525        | 1.0325        | 0.248705        |
| -0.51016        | 2410        | 3.6929       | 3.8571       | -0.8754         | 1771        | 10.615        | 3.995         | 0.963479        |
| -0.27354        | 1519        | 2.2383       | 5.3117       | -1.20591        | 1574        | 9.0851        | 2.4651        | 0.594354        |
| -0.65162        | 2094        | 4.298        | 3.252        | -0.73791        | 1739        | 7.8206        | 1.2006        | 0.289263        |
| -0.83595        | 1398        | 2.432        | 5.118        | -1.1619         | 1433        | 6.769         | 0.149         | 0.03554         |
| 0.412396        | 1646        | 6.3791       | 1.1709       | -0.26505        | 1004        | 9.4622        | 2.8422        | 0.685339        |
| 0.739079        | 1641        | 3.4735       | 4.0765       | -0.92525        | 774         | 11.628        | 5.008         | 1.20789         |
| -1.02251        | 1329        | 1.2039       | 6.3461       | -1.44094        | 1165        | 6.7811        | 0.1611        | 0.038459        |
| -1.23387        | 609         | 1.8062       | 5.7438       | -1.30409        | 813         | 10.947        | 4.327         | 1.043582        |
| 0.343026        | 2363        | 5.0783       | 2.4717       | -0.56061        | 1894        | 7.9197        | 1.2997        | 0.313174        |
| 1.690174        | 2577        | 7.7222       | 0.1722       | 0.040127        | 1811        | 12.148        | 5.528         | 1.333352        |
| 0.666749        | 831         | 1.083        | 6.467        | -1.46841        | 517         | 11.412        | 4.792         | 1.155775        |
| 0.688273        | 1932        | 2.8986       | 4.6514       | -1.05588        | 1284        | 7.3988        | 0.7788        | 0.187494        |
| 0.687119        | 1069        | 5.4256       | 2.1244       | -0.4817         | 1067        | 9.5595        | 2.9395        | 0.708815        |
| 0.063448        | 3054        | 2.0956       | 5.4544       | -1.23833        | 2495        | 7.9359        | 1.3159        | 0.317082        |
| 0.999413        | 2095        | 6.5394       | 1.0106       | -0.22863        | 1910        | 9.4241        | 2.8041        | 0.676146        |
| -0.71302        | 2111        | 4.1213       | 3.4287       | -0.77806        | 1478        | 5.0068        | 1.6132        | -0.38963        |
| 1.237779        | 1253        | 6.3049       | 1.2451       | -0.28191        | 1097        | 3.464         | 3.156         | -0.76187        |
| 0.700323        | 846         | 16.785       | 9.235        | 2.09935         | 2230        | 12.422        | 5.802         | 1.399461        |
| 0.536123        | 907         | 15.987       | 8.437        | 1.918031        | 1276        | 11.207        | 4.587         | 1.106314        |
| <b>3.464224</b> | <b>1889</b> | <b>17.84</b> | <b>10.29</b> | <b>2.339064</b> | <b>1666</b> | <b>16.747</b> | <b>10.127</b> | <b>2.442971</b> |
| -0.17764        | 2085        | 8.2494       | 0.6994       | 0.159915        | 1159        | 16.48         | 9.86          | 2.378551        |
| 0.771084        | 1471        | 21.414       | 13.864       | 3.151138        | 829         | 13.631        | 7.011         | 1.691162        |
| 0.68706         | 2316        | 11.01        | 3.46         | 0.787171        | 1100        | 11.455        | 4.835         | 1.166149        |
| 3.251942        | 1200        | 16.333       | 8.783        | 1.996648        | 1677        | 12.582        | 5.962         | 1.438065        |
| 1.657902        | 3069        | 11.795       | 4.245        | 0.965537        | 2707        | 13.373        | 6.753         | 1.628913        |
| 1.335482        | 1951        | 11.43        | 3.88         | 0.882602        | 1425        | 10.947        | 4.327         | 1.043582        |
| 0.216427        | 1990        | 7.8894       | 0.3394       | 0.078117        | 1995        | 14.135        | 7.515         | 1.812764        |
| -0.22664        | 1591        | 6.2854       | 1.2646       | -0.28634        | 1262        | 7.7655        | 1.1455        | 0.275969        |
| 1.604017        | 1954        | 10.133       | 2.583        | 0.587902        | 461         | 7.1584        | 0.5384        | 0.129492        |
| 0.483778        | 2308        | 5.6759       | 1.8741       | -0.42483        | 1658        | 9.6502        | 3.0302        | 0.730698        |
| 1.00264         | 1884        | 8.0679       | 0.5179       | 0.118676        | 2015        | 11.861        | 5.241         | 1.264107        |
| 0.398658        | 2700        | 5.5556       | 1.9944       | -0.45216        | 2813        | 12.264        | 5.644         | 1.36134         |
| 1.711491        | 1862        | 7.0892       | 0.4608       | -0.1037         | 1912        | 10.46         | 3.84          | 0.926082        |
| -0.13788        | 2015        | 5.7072       | 1.8428       | -0.41772        | 1967        | 5.1856        | 1.4344        | -0.34649        |
| 0.993166        | 1404        | 13.177       | 5.627        | 1.279551        | 1018        | 7.3674        | 0.7474        | 0.179918        |
| -0.21074        | 705         | 11.064       | 3.514        | 0.799441        | 1483        | 7.2151        | 0.5951        | 0.143172        |
| -0.67439        | 835         | 7.0659       | 0.4841       | -0.109          | 1907        | 3.7231        | 2.8969        | -0.69936        |
|                 | 1814.5      | 7.5456       | 2.9737       |                 | 1509        | 6.6217        | 2.80045       |                 |
|                 |             |              | 8.9211       |                 |             |               | 8.40135       |                 |
|                 |             |              | 4.401076     |                 |             |               | 4.144666      |                 |
| 1372            | 39.359      |              | 1507         | 31.851          |             |               |               |                 |
| 2955            | 31.506      |              | 2195         | 42.597          |             |               |               |                 |
| 2237            | 27.045      |              | 2394         | 17.126          |             |               |               |                 |
| 2506            | 35.754      |              | 3806         | 43.221          |             |               |               |                 |
| 2267.5          | 33.416      |              | 2475.5       | 33.69875        |             |               |               |                 |



|          |          |          |          |     |        |     |        |
|----------|----------|----------|----------|-----|--------|-----|--------|
| 666.4305 | 5.323634 | 964.9775 | 12.21914 |     |        |     |        |
| 406      | 2.2167   | 390      | 16.154   |     |        |     |        |
|          |          | 501      | 12.774   | 720 | 13.333 | 369 | 5.1491 |
| 393      | 5.0891   |          |          |     |        |     |        |
| 513      | 4.6784   | 368      | 20.109   |     |        |     |        |
| 437.3333 | 3.994733 | 419.6667 | 16.34567 |     |        |     |        |
| 65.85084 | 1.553454 | 71.29049 | 3.671254 |     |        |     |        |
|          | 15.9709  |          | 36.65743 |     |        |     |        |
|          | 4.660363 |          | 11.01376 |     |        |     |        |
|          | 20.63126 |          | 47.67119 |     |        |     |        |
|          | 29.42127 |          | 17.35308 |     |        |     |        |
|          | 0.701236 |          | 2.747131 |     |        |     |        |
|          | 0.298764 |          | -1.74713 |     |        |     |        |

x toxic a,b,c

x toxic a,b,c

x toxic a,b,c

x toxic b,c

x toxic a,b,c

x toxic a,b,c

y

y

x toxic b,c

x toxic a,b,c

y

x toxic b,c

y

x toxic a,b

y



|           |                        |                  | cell ct | % inf  | AD     |
|-----------|------------------------|------------------|---------|--------|--------|
| 50080 A02 | M-031951- chromoson    | 387119 C6orf204  | 916     | 6.5502 | 0.8202 |
| 50080 A04 | M-032028- forkhead b   | 387054 FOXD4L3   | 1167    | 5.7412 | 0.0112 |
| 50080 A05 | M-018147- hypothetic   | 353116 FLJ39378  | 1103    | 9.7915 | 4.0615 |
| 50080 A06 | M-032209- zinc finger  | 387032 ZKSCAN4   | 778     | 10.283 | 4.553  |
| 50080 A07 | M-018129- hypothetic   | 353117 FLJ39582  | 1070    | 9.4393 | 3.7093 |
| 50080 A08 | M-031070- hypothetic   | 386759 MGC9913   | 747     | 5.087  | 0.643  |
| 50080 A09 | M-019023- late cornifi | 353139 LCE2A     | 372     | 12.903 | 7.173  |
| 50080 A10 | M-031737- solute carri | 386757 SLC6A10P  | 2698    | 5.2261 | 0.5039 |
| 50080 A11 | M-019024- late cornifi | 353140 LCE2C     | 583     | 9.434  | 3.704  |
| 50080 A12 | M-031727- adhesion r   | 386724 AMIGO3    | 427     | 4.6838 | 1.0462 |
| 50080 A13 | M-019026- late cornifi | 353142 LCE3A     | 286     | 2.4476 | 3.2824 |
| 50080 A14 | M-031734- keratin assi | 386683 KRTAP12-3 | 1008    | 7.7381 | 2.0081 |
| 50080 A15 | M-019028- late cornifi | 353143 LCE3B     | 629     | 11.765 | 6.035  |
| 50080 A16 | M-031544- keratin assi | 386681 KRTAP10-8 | 1384    | 19.22  | 13.49  |
| 50080 A17 | M-019029- late cornifi | 353144 LCE3C     | 710     | 13.662 | 7.932  |
| 50080 A18 | M-031733- potassium    | 386618 KCTD4     | 699     | 14.02  | 8.29   |
| 50080 A19 | M-018364- hypothetic   | 353149 MGC51025  | 943     | 10.392 | 4.662  |
| 50080 A20 | M-031732- potassium    | 386617 KCTD8     | 561     | 11.23  | 5.5    |
| 50080 A21 | M-009142- ligand-gate  | 353174 LGICZ1    | 549     | 15.483 | 9.753  |
| 50080 A23 | M-007374- solute carri | 353189 SLC04C1   | 150     | 28     | 22.27  |
| 50080 B02 | M-032151- family with  | 400728 FAM87B    | 1308    | 1.4526 | 4.2774 |
| 50080 B04 | M-032212- eosinophil   | 400696 LOC400696 | 1008    | 4.0675 | 1.6625 |
| 50080 B05 | M-032205- neuropepti   | 387129 NPSR1     | 1653    | 7.7435 | 2.0135 |
| 50080 B06 | M-032146- FLJ46230 p   | 400679 FLJ46230  | 779     | 4.4929 | 1.2371 |
| 50080 B07 | M-027181- SLC7A5 pse   | 387254 IMAA      | 845     | 2.3669 | 3.3631 |
| 50080 B08 | M-032149- FLJ45684 lc  | 400666 FLJ45684  | 761     | 5.2562 | 0.4738 |
| 50080 B09 | M-031772- hypothetic   | 387277 MGC45477  | 1598    | 2.3154 | 3.4146 |
| 50080 B10 | M-032145- FLJ44881     | 400661 FLJ44881  | 2054    | 13.096 | 7.366  |
| 50080 B11 | M-032014- zinc finger  | 387328 ZNF322B   | 1007    | 9.8312 | 4.1012 |
| 50080 B12 | M-032147- FLJ44313 p   | 400658 FLJ44313  | 1159    | 5.0043 | 0.7257 |
| 50080 B13 | M-031738- TATA box b   | 387332 TBPL2     | 1261    | 8.0888 | 2.3588 |
| 50080 B14 | M-032144- FLJ35767 p   | 400629 FLJ35767  | 466     | 11.588 | 5.858  |
| 50080 B15 | M-027291- NOL1/NOP     | 387338 NSUN4     | 974     | 5.3388 | 0.3912 |
| 50080 B16 | M-032143- FLJ46026 p   | 400627 FLJ46026  | 843     | 9.4899 | 3.7599 |
| 50080 B17 | M-031911- RAS-like, fa | 387496 RASL11A   | 1363    | 8.2172 | 2.4872 |
| 50080 B18 | M-032142- FLJ46126 p   | 400597 FLJ46126  | 1553    | 16.098 | 10.368 |
| 50080 B19 | M-027388- G protein-c  | 387509 GPR153    | 1065    | 5.8216 | 0.0916 |
| 50080 B20 | M-032139- FLJ44815 p   | 400591 FLJ44815  | 2319    | 9.2281 | 3.4981 |
| 50080 B21 | M-032201- ubiquitin-c  | 387521 Kua       | 1392    | 2.8017 | 2.9283 |
| 50080 B23 | M-032200- ubiquitin-c  | 387522 Kua-UEV   | 1895    | 16.992 | 11.262 |
| 50080 C02 | M-027974- hypothetic   | 386597 LOC386597 | 1523    | 3.7426 | 1.9874 |
| 50080 C04 | M-029350- hypothetic   | 379034 FLJ10489  | 887     | 10.259 | 4.529  |
| 50080 C05 | M-007176- zinc finger  | 353274 ZNF445    | 1318    | 7.5114 | 1.7814 |
| 50080 C06 | M-010758- ring finger  | 378925 RNF148    | 952     | 9.2437 | 3.5137 |
| 50080 C07 | M-017994- synleurin    | 353281 SLRN      | 2280    | 10.263 | 4.533  |
| 50080 C08 | M-027323- NHL repeat   | 378884 NHLRC1    | 1631    | 5.3955 | 0.3345 |

|                  |                              |                       |            |               |               |
|------------------|------------------------------|-----------------------|------------|---------------|---------------|
| 50080 C09        | M-018748- keratin 26         | 353288 KRT26          | 1062       | 11.77         | 6.04          |
| 50080 C10        | M-031889- chromoson          | 378832 C21orf123      | 952        | 9.2437        | 3.5137        |
| 50080 C11        | M-031742- chromoson          | 353289 C4orf11        | 666        | 12.763        | 7.033         |
| 50080 C12        | M-027514- cation char        | 378807 CATSPER4       | 1419       | 12.051        | 6.321         |
| 50080 C13        | M-018782- regulator o        | 353299 RGSL1          | 783        | 14.815        | 9.085         |
| 50080 C14        | M-028933- hypothetical       | 378805 FLJ43663       | 989        | 5.4601        | 0.2699        |
| <b>50080 C15</b> | <b>M-018949- ankyrin rep</b> | <b>353322 ANKRD37</b> | <b>813</b> | <b>24.846</b> | <b>19.116</b> |
| 50080 C16        | M-019340- MORN repr          | 378464 MORN2          | 1358       | 9.352         | 3.622         |
| 50080 C17        | M-018842- keratin assi       | 353323 KRTAP12-2      | 861        | 22.532        | 16.802        |
| 50080 C18        | M-031736- tripartite r       | 378108 TRIM74         | 1179       | 11.45         | 5.72          |
| 50080 C19        | M-018993- spermatogi         | 353324 SPATA12        | 1653       | 11.252        | 5.522         |
| 50080 C20        | M-027275- ectonucleo         | 377841 ENTPD8         | 2178       | 5.6933        | 0.0367        |
| 50080 C21        | M-018837- keratin assi       | 353333 KRTAP10-1      | 1728       | 8.1019        | 2.3719        |
| 50080 C23        | M-018565- zinc finger        | 353355 ZNF233         | 868        | 3.1106        | 2.6194        |
| 50080 D02        | M-032138- FLJ35934 p         | 400579 FLJ35934       | 1157       | 0.17286       | 5.55714       |
| 50080 D04        | M-032137- FLJ45200 p         | 400563 FLJ45200       | 1813       | 2.2063        | 3.5237        |
| 50080 D05        | M-031741- chromoson          | 387597 C1orf32        | 2609       | 3.4879        | 2.2421        |
| 50080 D06        | M-032136- FLJ45121 p         | 400556 FLJ45121       | 2067       | 3.0963        | 2.6337        |
| 50080 D07        | M-031740- putative U5        | 387601 LOC387601      | 1332       | 3.003         | 2.727         |
| 50080 D08        | M-032134- FLJ27243 p         | 400539 FLJ27243       | 1176       | 2.551         | 3.179         |
| 50080 D09        | M-031885- keratinocyt        | 387628 KGFLP1         | 1458       | 2.332         | 3.398         |
| 50080 D10        | M-032133- FLJ44674 p         | 400535 FLJ44674       | 1124       | 0.97865       | 4.75135       |
| 50080 D11        | M-032220- hypothetical       | 387640 FLJ45187       | 1680       | 3.3333        | 2.3967        |
| 50080 D12        | M-032132- FLJ45256 p         | 400511 FLJ45256       | 1226       | 7.2594        | 1.5294        |
| 50080 D13        | M-032048- SH2 domai          | 387694 SH2D4B         | 2325       | 5.8495        | 0.1195        |
| 50080 D14        | M-032131- IFMQ9370           | 400454 UNQ9370        | 1012       | 9.585         | 3.855         |
| 50080 D15        | M-032051- chromoson          | 387695 C10orf99       | 1611       | 12.042        | 6.312         |
| 50080 D16        | M-032129- hypothetical       | 400451 LOC400451      | 1185       | 10.97         | 5.24          |
| 50080 D17        | M-031927- similar to R       | 387758 LOC387758      | 1785       | 5.6583        | 0.0717        |
| 50080 D18        | M-032128- FLJ39531 p         | 400360 FLJ39531       | 257        | 12.451        | 6.721         |
| 50080 D19        | M-032049- olfactory re       | 387772 UNQ6469        | 1800       | 3.2778        | 2.4522        |
| 50080 D20        | M-032126- FLJ35695 p         | 400359 FLJ35695       | 1087       | 8.2797        | 2.5497        |
| 50080 D21        | M-032053- C-type lecti       | 387836 CLEC2A         | 1471       | 7.6818        | 1.9518        |
| 50080 D23        | M-031906- C-type lecti       | 387837 CLEC12B        | 1237       | 5.0121        | 0.7179        |
| 50080 E02        | M-029301- hypothetical       | 377711 KIAA1833       | 1925       | 0.46753       | 5.26247       |
| 50080 E04        | M-027325- carbonic ar        | 377677 CA13           | 1701       | 1.6461        | 4.0839        |
| 50080 E05        | M-004334- toll-like rec      | 353376 TICAM2         | 1774       | 2.3112        | 3.4188        |
| 50080 E06        | M-027332- deubiquitir        | 377630 DUB3           | 2136       | 2.2472        | 3.4828        |
| 50080 E07        | M-021393- polymerase         | 353497 POLN           | 3120       | 2.1154        | 3.6146        |
| 50080 E08        | M-032009- testis serin       | 377047 TESSP5         | 2069       | 1.6916        | 4.0384        |
| 50080 E09        | M-018645- bone morp          | 353500 BMP8A          | 1865       | 1.7694        | 3.9606        |
| 50080 E10        | M-027274- kelch-like 3       | 377007 KLHL30         | 2427       | 1.5245        | 4.2055        |
| 50080 E11        | M-013100- leukocyte i        | 353514 LILRA5         | 2288       | 1.9231        | 3.8069        |
| 50080 E12        | M-031947- zinc finger        | 376940 ZC3H6          | 2213       | 7.3656        | 1.6356        |
| 50080 E13        | M-009124- chromoson          | 359710 C20orf185      | 1656       | 3.3213        | 2.4087        |
| 50080 E14        | M-010759- solute carri       | 376497 SLC27A1        | 1775       | 2.2535        | 3.4765        |
| 50080 E15        | M-019315- family with        | 359845 FAM101B        | 1869       | 1.1771        | 4.5529        |

|           |                        |                  |      |        |        |
|-----------|------------------------|------------------|------|--------|--------|
| 50080 E16 | M-031564- RAB15, me    | 376267 RAB15     | 1322 | 3.5552 | 2.1748 |
| 50080 E17 | M-007177- interferon i | 359948 IRF2BP2   | 1844 | 1.9523 | 3.7777 |
| 50080 E18 | M-027337- leucine ric  | 376132 LRRC10    | 1888 | 3.9195 | 1.8105 |
| 50080 E19 | M-019293- zinc finger  | 360023 ZBTB41    | 2419 | 2.4804 | 3.2496 |
| 50080 E20 | M-027273- deleted in i | 375940 FLJ46361  | 1891 | 5.1824 | 0.5476 |
| 50080 E21 | M-027028- homeobox     | 360030 LOC360030 | 3054 | 5.1081 | 0.6219 |
| 50080 E23 | M-008989- FK506 bind   | 360132 FKBP9L    | 1068 | 1.6854 | 4.0446 |
| 50080 F02 | M-032123- hypothetic   | 400242 FLJ45244  | 845  | 1.5385 | 4.1915 |
| 50080 F04 | M-032122- FLJ39779 p   | 400223 FLJ39779  | 803  | 6.9738 | 1.2438 |
| 50080 F05 | M-032050- overexpres   | 387882 OCC-1     | 990  | 4.6465 | 1.0835 |
| 50080 F06 | M-032121- FLJ42220 p   | 400207 FLJ42220  | 1871 | 6.6275 | 0.8975 |
| 50080 F07 | M-031917- SET domair   | 387893 SETD8     | 547  | 5.3016 | 0.4284 |
| 50080 F08 | M-032120- FLJ26443 p   | 400165 FLJ26443  | 1038 | 4.2389 | 1.4911 |
| 50080 F09 | M-032055- TIMM9        | 387990 UNQ9438   | 789  | 3.6755 | 2.0545 |
| 50080 F10 | M-031901- hypothetic   | 400120 LOC400120 | 1017 | 1.9666 | 3.7634 |
| 50080 F11 | M-032052- serpin pept  | 388007 SERPINA13 | 1552 | 4.317  | 1.413  |
| 50080 F12 | M-032225- FLJ46358 p   | 400110 FLJ46358  | 957  | 5.0157 | 0.7143 |
| 50080 F13 | M-032057- transmemk    | 388021 TMEM179   | 1759 | 4.8891 | 0.8409 |
| 50080 F14 | M-032118- FLJ43808 p   | 400083 FLJ43808  | 1149 | 5.8312 | 0.1012 |
| 50080 F15 | M-032054- FLJ43339 p   | 388115 FLJ43339  | 1397 | 3.5791 | 2.1509 |
| 50080 F16 | M-032115- FLJ43486 p   | 400082 FLJ43486  | 694  | 6.6282 | 0.8982 |
| 50080 F17 | M-032059- tumor necr   | 388121 TNFAIP8L3 | 1085 | 4.1475 | 1.5825 |
| 50080 F18 | M-032113- FLJ42957 p   | 400077 FLJ42957  | 1950 | 5.4872 | 0.2428 |
| 50080 F19 | M-032056- similar to u | 388165 FLJ43276  | 2436 | 7.225  | 1.495  |
| 50080 F20 | M-032112- FLJ40142 p   | 400073 FLJ40142  | 1547 | 8.7912 | 3.0612 |
| 50080 F21 | M-032061- FLJ42289 p   | 388182 FLJ42289  | 2194 | 4.0565 | 1.6735 |
| 50080 F23 | M-032058- QRWT581C     | 388218 UNQ5810   | 1888 | 4.5551 | 1.1749 |
| 50080 G02 | M-027279- Similar to F | 375791 MGC59937  | 2628 | 1.5601 | 4.1699 |
| 50080 G04 | M-010312- patatin-like | 375775 PNPLA7    | 1019 | 6.1825 | 0.4525 |
| 50080 G05 | M-019463- transmemk    | 360200 TMPRSS9   | 1253 | 5.5866 | 0.1434 |
| 50080 G06 | M-032130- chromoson    | 375759 C9orf50   | 1709 | 4.9152 | 0.8148 |
| 50080 G07 | M-019460- glycosyltra  | 360203 GLT6D1    | 1360 | 1.3971 | 4.3329 |
| 50080 G08 | M-029596- chromoson    | 375757 C9orf119  | 1756 | 3.303  | 2.427  |
| 50080 G09 | M-019445- testis serin | 360226 TESSP1    | 735  | 6.6667 | 0.9367 |
| 50080 G10 | M-029572- RAD26L hy    | 375748 LOC375748 | 913  | 3.6145 | 2.1155 |
| 50080 G11 | M-031837- ubiquitin s  | 373509 USP50     | 1578 | 6.5272 | 0.7972 |
| 50080 G12 | M-010311- protein pre  | 375743 PTAR1     | 1771 | 5.4207 | 0.3093 |
| 50080 G13 | M-031434- ubiquitin s  | 373856 USP41     | 964  | 8.5062 | 2.7762 |
| 50080 G14 | M-029511- aquaporin    | 375719 AQP7P1    | 1195 | 3.431  | 2.299  |
| 50080 G15 | M-019355- histone link | 373861 HILS1     | 1725 | 1.1014 | 4.6286 |
| 50080 G16 | M-029524- CXYorf1-re   | 375690 FLJ00038  | 1180 | 3.8983 | 1.8317 |
| 50080 G17 | M-019345- dead end h   | 373863 DND1      | 1022 | 1.6634 | 4.0666 |
| 50080 G18 | M-031850- spermatog    | 375686 SPATC1    | 636  | 3.9308 | 1.7992 |
| 50080 G19 | M-031977- CMT1A dup    | 374286 CDRT1     | 1320 | 3.0303 | 2.6997 |
| 50080 G20 | M-032127- cysteine ric | 375616 CRIM2     | 1033 | 5.4211 | 0.3089 |
| 50080 G21 | M-007912- patched dc   | 374308 PTCHD3    | 1382 | 1.809  | 3.921  |
| 50080 G23 | M-031720- NHL repeat   | 374354 NHLRC2    | 1209 | 3.8048 | 1.9252 |

|           |                        |                  |      |        |        |
|-----------|------------------------|------------------|------|--------|--------|
| 50080 H02 | M-032110- hypothetical | 400002 FLJ46363  | 1325 | 5.8113 | 0.0813 |
| 50080 H04 | M-032108- FLJ44874 p   | 399990 FLJ44874  | 347  | 21.614 | 15.884 |
| 50080 H05 | M-030764- similar to R | 388271 LOC388271 | 877  | 9.008  | 3.278  |
| 50080 H06 | M-032106- chromosom    | 399980 C11orf39  | 1128 | 6.6489 | 0.9189 |
| 50080 H07 | M-032063- chromosom    | 388289 C16orf47  | 941  | 11.477 | 5.747  |
| 50080 H08 | M-032105- FLJ45950 p   | 399975 FLJ45950  | 751  | 9.1877 | 3.4577 |
| 50080 H09 | M-032000- DTFT5783     | 388325 UNQ5783   | 1474 | 6.3094 | 0.5794 |
| 50080 H10 | M-032202- FLJ46266 p   | 399949 FLJ46266  | 1063 | 7.1496 | 1.4196 |
| 50080 H11 | M-032060- FLJ45455 p   | 388336 FLJ45455  | 738  | 9.2141 | 3.4841 |
| 50080 H12 | M-032104- FLJ45803 p   | 399948 FLJ45803  | 1165 | 4.8927 | 0.8373 |
| 50080 H13 | M-032065- chromosom    | 388341 C17orf76  | 1141 | 7.362  | 1.632  |
| 50080 H14 | M-032221- similar to e | 399947 LOC399947 | 1114 | 9.7846 | 4.0546 |
| 50080 H15 | M-031912- transmemk    | 388364 TMIGD1    | 1010 | 6.8317 | 1.1017 |
| 50080 H16 | M-032103- chromosom    | 399879 C11orf55  | 834  | 9.8321 | 4.1021 |
| 50080 H17 | M-031999- chemokine    | 388372 CCL4L2    | 837  | 5.8542 | 0.1242 |
| 50080 H18 | M-032102- hypothetical | 399851 LOC399851 | 799  | 9.7622 | 4.0322 |
| 50080 H19 | M-032062- hypothetical | 388387 FLJ31222  | 1276 | 5.2508 | 0.4792 |
| 50080 H20 | M-032101- forkhead b   | 399823 FOXI2     | 717  | 5.2999 | 0.4301 |
| 50080 H21 | M-032067- FLJ44861 p   | 388428 FLJ44861  | 1212 | 7.7558 | 2.0258 |
| 50080 H23 | M-032064- FLJ45910 p   | 388512 FLJ45910  | 789  | 4.1825 | 1.5475 |
| 50080 I02 | M-031781- lipoma HM    | 375612 LHFPL3    | 516  | 8.1395 | 2.4095 |
| 50080 I04 | M-031941- solute carri | 375611 SLC26A5   | 477  | 12.998 | 7.268  |
| 50080 I05 | M-031763- UDP-N-ace    | 374378 GALNTL4   | 746  | 2.9491 | 2.7809 |
| 50080 I06 | M-031848- FLJ39237 p   | 375607 FLJ39237  | 1659 | 5.6661 | 0.0639 |
| 50080 I07 | M-030031- hypothetical | 374383 DKFZp686C | 1432 | 7.4721 | 1.7421 |
| 50080 I08 | M-029614- olfactory re | 375601 OR7E31P   | 1740 | 4.4253 | 1.3047 |
| 50080 I09 | M-029985- hypothetical | 374387 DKFZp779M | 2650 | 5.8113 | 0.0813 |
| 50080 I10 | M-028896- tripartite r | 375593 TRIM73    | 1083 | 2.4007 | 3.3293 |
| 50080 I11 | M-031722- family with  | 374393 FAM111B   | 2065 | 6.4891 | 0.7591 |
| 50080 I12 | M-027272- von Willebr  | 375567 VWC2      | 910  | 3.956  | 1.774  |
| 50080 I13 | M-032107- similar to R | 374395 LOC374395 | 1931 | 9.5287 | 3.7987 |
| 50080 I14 | M-031844- gap junctio  | 375519 GJB7      | 1345 | 8.7732 | 3.0432 |
| 50080 I15 | M-031765- TBC1 doma    | 374403 TBC1D10C  | 1174 | 7.5809 | 1.8509 |
| 50080 I16 | M-031972- glucuronid   | 375513 GUSBL2    | 1167 | 6.4267 | 0.6967 |
| 50080 I17 | M-028949- DnaJ (Hsp4   | 374407 DNAJB13   | 809  | 2.3486 | 3.3814 |
| 50080 I18 | M-031840- chromosom    | 375484 C5orf25   | 1210 | 7.8512 | 2.1212 |
| 50080 I19 | M-031766- similar to C | 374408 MGC12965  | 1924 | 10.135 | 4.405  |
| 50080 I20 | M-031608- similar to n | 375449 LOC375449 | 1443 | 6.237  | 0.507  |
| 50080 I21 | M-031886- keratin 77   | 374454 KRT77     | 1422 | 6.7511 | 1.0211 |
| 50080 I23 | M-027185- protein tyr  | 374462 PTPRQ     | 643  | 5.5988 | 0.1312 |
| 50080 J02 | M-032099- FLJ40536 p   | 399819 FLJ40536  | 772  | 1.1658 | 4.5642 |
| 50080 J04 | M-032098- FLJ45983 p   | 399717 FLJ45983  | 1423 | 3.3732 | 2.3568 |
| 50080 J05 | M-032069- regulator o  | 388531 RGS9BP    | 879  | 6.3709 | 0.6409 |
| 50080 J06 | M-031768- SHC (Src hc  | 399694 SHC4      | 1038 | 6.0694 | 0.3394 |
| 50080 J07 | M-032066- keratinocyt  | 388533 KRTDAP    | 282  | 5.3191 | 0.4109 |
| 50080 J08 | M-031721- hypothetical | 399693 MGC50722  | 715  | 3.4965 | 2.2335 |
| 50080 J09 | M-031968- zinc finger  | 388536 ZNF790    | 1884 | 8.0149 | 2.2849 |

|           |                        |                  |      |         |         |
|-----------|------------------------|------------------|------|---------|---------|
| 50080 J10 | M-031755- myosin XVI   | 399687 MYO18A    | 449  | 0.66815 | 5.06185 |
| 50080 J11 | M-032071- IGF-like fan | 388555 IGLF3     | 950  | 7.0526  | 1.3226  |
| 50080 J12 | M-027355- HEAT repea   | 399671 HEATR4    | 611  | 2.946   | 2.784   |
| 50080 J13 | M-032068- FLJ45949 p   | 388560 FLJ45949  | 505  | 8.3168  | 2.5868  |
| 50080 J14 | M-027354- ribosomal j  | 399670 MGC34774  | 710  | 5.7746  | 0.0446  |
| 50080 J15 | M-032073- zinc finger  | 388569 ZNF324B   | 1010 | 5.9406  | 0.2106  |
| 50080 J16 | M-027353- family with  | 399665 FAM102A   | 835  | 2.2754  | 3.4546  |
| 50080 J17 | M-032070- ring finger  | 388591 RNF207    | 251  | 8.7649  | 3.0349  |
| 50080 J18 | M-031965- ring finger  | 399664 RKHD1     | 1265 | 7.2727  | 1.5427  |
| 50080 J19 | M-032075- CD164 sialc  | 388611 CD164L2   | 1051 | 12.559  | 6.829   |
| 50080 J20 | M-027349- zinc finger  | 399655 ZNF539    | 825  | 7.7576  | 2.0276  |
| 50080 J21 | M-027465- similar to F | 388625 LOC388625 | 1096 | 4.927   | 0.803   |
| 50080 J23 | M-032072- guanylate k  | 388646 GBP7      | 615  | 6.1789  | 0.4489  |
| 50080 K02 | M-031839- chromosom    | 375444 C5orf34   | 2247 | 3.1598  | 2.5702  |
| 50080 K04 | M-031838- leucine rich | 375387 LRRC33    | 1125 | 5.6889  | 0.0411  |
| 50080 K05 | M-027253- chromosom    | 374467 C12orf63  | 2257 | 7.798   | 2.068   |
| 50080 K06 | M-027271- FLJ44290 p   | 375347 FLJ44290  | 1576 | 3.9975  | 1.7325  |
| 50080 K07 | M-027254- chromosom    | 374470 C12orf42  | 1451 | 3.9283  | 1.8017  |
| 50080 K08 | M-027270- transmemk    | 375346 TMEM110   | 1248 | 9.5353  | 3.8053  |
| 50080 K09 | M-030336- Similar to L | 374569 LOC374569 | 1783 | 5.4403  | 0.2897  |
| 50080 K10 | M-031836- chromosom    | 375341 C3orf62   | 1289 | 6.3615  | 0.6315  |
| 50080 K11 | M-027255- testis expre | 374618 TEX9      | 1337 | 6.0583  | 0.3283  |
| 50080 K12 | M-028099- FLJ36157 p   | 375337 FLJ36157  | 1648 | 9.4053  | 3.6753  |
| 50080 K13 | M-032114- FLJ35171 p   | 374649 FLJ35171  | 618  | 10.68   | 4.95    |
| 50080 K14 | M-027269- lipoma HM    | 375323 LHFPL4    | 1513 | 6.9399  | 1.2099  |
| 50080 K15 | M-031731- golgi autoa  | 374650 FLJ40113  | 1350 | 9.7037  | 3.9737  |
| 50080 K16 | M-032245- aquaporin    | 375318 AQP12A    | 1891 | 13.696  | 7.966   |
| 50080 K17 | M-022322- kinesin far  | 374654 KIF7      | 999  | 7.8078  | 2.0778  |
| 50080 K18 | M-027268- hypothetic   | 375307 MGC50811  | 1505 | 8.4385  | 2.7085  |
| 50080 K19 | M-031888- zinc finger  | 374655 ZNF710    | 1968 | 7.8252  | 2.0952  |
| 50080 K20 | M-027336- ceramide k   | 375298 CERKL     | 1946 | 4.4707  | 1.2593  |
| 50080 K21 | M-031786- HD domain    | 374659 HDDC3     | 2047 | 7.2789  | 1.5489  |
| 50080 K23 | M-032219- hypothetic   | 374676 LOC374676 | 2283 | 9.5488  | 3.8188  |
| 50080 L02 | M-027348- hypothetic   | 399563 FLJ43806  | 831  | 1.3237  | 4.4063  |
| 50080 L04 | M-031743- solute carri | 399512 SLC25A35  | 2407 | 8.6415  | 2.9115  |
| 50080 L05 | M-032077- hypothetic   | 388666 FLJ36116  | 1905 | 4.5669  | 1.1631  |
| 50080 L06 | M-027563- TTMB prot    | 399474 TTMB      | 862  | 5.5684  | 0.1616  |
| 50080 L07 | M-032015- family with  | 374666 FAM39DP   | 1341 | 4.8471  | 0.8829  |
| 50080 L08 | M-028692- chromosom    | 394263 C6orf205  | 956  | 3.0335  | 2.6965  |
| 50080 L09 | M-018814- kidney assc  | 353219 KAAG1     | 892  | 9.6413  | 3.9113  |
| 50080 L10 | M-032096- TPT1-like p  | 392490 FLJ44635  | 714  | 9.6639  | 3.9339  |
| 50080 L11 | M-018840- keratin ass  | 353332 KRTAP12-1 | 1166 | 3.6878  | 2.0422  |
| 50080 L12 | M-028355- deubiquitir  | 391622 DUB4      | 466  | 7.7253  | 1.9953  |
| 50080 L13 | M-031735- keratin ass  | 386684 KRTAP12-4 | 886  | 6.5463  | 0.8163  |
| 50080 L14 | M-032097- C1q and tu   | 390664 C1QTNF8   | 1392 | 7.3994  | 1.6694  |
| 50080 L15 | M-031719- keratin ass  | 386685 KRTAP10-1 | 738  | 3.6585  | 2.0715  |
| 50080 L16 | M-031871- similar to F | 390511 LOC390511 | 1354 | 7.9025  | 2.1725  |

|           |                        |                  |      |        |        |
|-----------|------------------------|------------------|------|--------|--------|
| 50080 L17 | M-031979- keratin assi | 386679 KRTAP10-2 | 748  | 4.4118 | 1.3182 |
| 50080 L18 | M-031997- G protein-c  | 390212 GPR152    | 1394 | 1.5065 | 4.2235 |
| 50080 L19 | M-031501- keratin assi | 386672 KRTAP10-4 | 1070 | 4.6729 | 1.0571 |
| 50080 L20 | M-031625- ubiquitin-ci | 389898 UBE2NL    | 838  | 5.7279 | 0.0021 |
| 50080 L21 | M-031541- keratin assi | 386680 KRTAP10-5 | 825  | 5.5758 | 0.1542 |
| 50080 L23 | M-031525- keratin assi | 386676 KRTAP10-9 | 1244 | 6.9936 | 1.2636 |
| 50080 M02 | M-027999- hypothetic   | 375295 LOC375295 | 851  | 5.8754 | 0.1454 |
| 50080 M04 | M-027267- RNA bindin   | 375287 RBM43     | 1389 | 7.4874 | 1.7574 |
| 50080 M05 | M-032181- testis/pros  | 374739 TEPP      | 2558 | 5.6685 | 0.0615 |
| 50080 M06 | M-031853- family with  | 375260 FAM39B    | 2478 | 12.591 | 6.861  |
| 50080 M07 | M-032109- chromoson    | 374768 C17orf83  | 2260 | 3.8938 | 1.8362 |
| 50080 M08 | M-027905- ankyrin rep  | 375248 ANKRD36   | 3356 | 7.5089 | 1.7789 |
| 50080 M09 | M-031787- EF-hand ca   | 374786 EFCAB5    | 3972 | 11.631 | 5.901  |
| 50080 M10 | M-027266- hypothetic   | 375190 LOC375190 | 3097 | 16.468 | 10.738 |
| 50080 M11 | M-032008- chromoson    | 374864 C18orf34  | 2347 | 4.6442 | 1.0858 |
| 50080 M12 | M-027358- profilin far | 375189 PFN4      | 2118 | 8.593  | 2.863  |
| 50080 M13 | M-032249- ATPase, Cl   | 374868 ATP9B     | 2950 | 16.542 | 10.812 |
| 50080 M14 | M-032119- similar to p | 375133 LOC375133 | 1931 | 3.2108 | 2.5192 |
| 50080 M15 | M-027257- chromoson    | 374872 C19orf35  | 2658 | 6.6215 | 0.8915 |
| 50080 M16 | M-027329- hypothetic   | 375127 FLJ26056  | 1165 | 11.931 | 6.201  |
| 50080 M17 | M-027191- hydroxyste   | 374875 HSD11B1L  | 2295 | 6.5795 | 0.8495 |
| 50080 M18 | M-027278- lipase, mer  | 149998 LIPI      | 1448 | 6.3536 | 0.6236 |
| 50080 M19 | M-027331- chromoson    | 374877 C19orf45  | 1185 | 18.734 | 13.004 |
| 50080 M20 | M-027265- FLJ44670 p   | 375096 FLJ44670  | 2843 | 7.5273 | 1.7973 |
| 50080 M21 | M-031221- zinc finger  | 374879 ZNF699    | 2227 | 14.549 | 8.819  |
| 50080 M23 | M-027258- FLJ44968 p   | 374887 FLJ44968  | 1822 | 8.562  | 2.832  |
| 50080 N02 | M-031745- zinc finger, | 389874 ZCCHC13   | 1765 | 2.4363 | 3.2937 |
| 50080 N04 | M-031910- sperm acro   | 389852 SPACA5    | 2115 | 4.6336 | 1.0964 |
| 50080 N05 | M-019016- late cornifi | 353133 LCE1C     | 3128 | 7.2251 | 1.4951 |
| 50080 N06 | M-004847- mitogen-ac   | 389840 MAP3K15   | 1900 | 1.5263 | 4.2037 |
| 50080 N07 | M-019020- late cornifi | 353135 LCE1E     | 2176 | 3.2629 | 2.4671 |
| 50080 N08 | M-032092- family with  | 389835 FAM72A    | 1857 | 1.3463 | 4.3837 |
| 50080 N09 | M-008071- similar to p | 387870 LOC387870 | 1099 | 2.5478 | 3.1822 |
| 50080 N10 | M-031892- MSFL2541     | 389812 UNQ2541   | 2425 | 4.3299 | 1.4001 |
| 50080 N11 | M-027172- similar to N | 387927 LOC387927 | 1667 | 8.4583 | 2.7283 |
| 50080 N12 | M-032095- FLJ46082 p   | 389799 FLJ46082  | 1366 | 7.101  | 1.371  |
| 50080 N13 | M-027173- similar to e | 388226 LOC388226 | 1545 | 5.5663 | 0.1637 |
| 50080 N14 | M-031899- immediate    | 389792 IER5L     | 1284 | 8.567  | 2.837  |
| 50080 N15 | M-027174- SH3-bindin   | 388228 SBK1      | 1787 | 3.8612 | 1.8688 |
| 50080 N16 | M-032090- FLJ44082 p   | 389762 FLJ44082  | 1475 | 5.4237 | 0.3063 |
| 50080 N17 | M-019015- late cornifi | 353132 LCE1B     | 2165 | 6.1894 | 0.4594 |
| 50080 N18 | M-027343- v-maf musc   | 389692 MAFA      | 2465 | 4.9493 | 0.7807 |
| 50080 N19 | M-031851- chromoson    | 375704 C9orf165  | 3225 | 10.14  | 4.41   |
| 50080 N20 | M-032087- FLJ43860 p   | 389690 FLJ43860  | 2890 | 4.2215 | 1.5085 |
| 50080 N21 | M-032222- zinc finger  | 389114 ZNF662    | 996  | 9.8394 | 4.1094 |
| 50080 N23 | M-031926- chromoson    | 389119 C3orf54   | 790  | 6.2025 | 0.4725 |
| 50080 O02 | M-027264- family with  | 375061 FAM89A    | 1171 | 3.5013 | 2.2287 |

|           |                         |                  |         |          |          |
|-----------|-------------------------|------------------|---------|----------|----------|
| 50080 O04 | M-032125- SFT2 doma     | 375035 SFT2D2    | 2796    | 5.4363   | 0.2937   |
| 50080 O05 | M-031264- hypothetic    | 374890 LOC37489C | 2329    | 0.90167  | 4.82833  |
| 50080 O06 | M-027718- platelet en   | 375033 PEAR1     | 2678    | 3.3607   | 2.3693   |
| 50080 O07 | M-027259- suprabasin    | 374897 SBSN      | 2456    | 0.9772   | 4.7528   |
| 50080 O08 | M-031804- SEC63 dom     | 374992 SEC63D1   | 1860    | 1.7204   | 4.0096   |
| 50080 O09 | M-031096- hypothetic    | 374899 DKFZp779C | 1345    | 2.2305   | 3.4995   |
| 50080 O10 | M-032116- chromoson     | 374987 C1orf118  | 1449    | 2.7605   | 2.9695   |
| 50080 O11 | M-027357- zinc finger   | 374900 ZNF568    | 817     | 5.3856   | 0.3444   |
| 50080 O12 | M-031797- family with   | 374986 FAM73A    | 928     | 2.8017   | 2.9283   |
| 50080 O13 | M-031757- UDP-GlcNA     | 374907 B3GNT8    | 1682    | 3.7455   | 1.9845   |
| 50080 O14 | M-027321- chromoson     | 374977 C1orf175  | 1094    | 5.3931   | 0.3369   |
| 50080 O15 | M-027260- IGF-like fan  | 374918 IGFL1     | 1068    | 4.6816   | 1.0484   |
| 50080 O16 | M-027472- LOC37497E     | 374973 LOC37497E | 1060    | 8.4906   | 2.7606   |
| 50080 O17 | M-032111- hypothetic    | 374920 LOC37492C | 1348    | 1.3353   | 4.3947   |
| 50080 O18 | M-032124- coiled-coil   | 374969 CCDC23    | 2221    | 5.1328   | 0.5972   |
| 50080 O19 | M-027261- zinc finger   | 374928 ZNF773    | 2121    | 4.9033   | 0.8267   |
| 50080 O20 | M-031793- spermatog     | 374955 SPATA21   | 829     | 10.615   | 4.885    |
| 50080 O21 | M-027262- LOC148872     | 374939 MGC35434  | 446     | 4.7085   | 1.0215   |
| 50080 O23 | M-027341- chromoson     | 374946 C1orf187  | 309     | 11.65    | 5.92     |
| 50080 P02 | M-031893- RNA bindin    | 389677 RBM12B    | 2132    | 3.9869   | 1.7431   |
| 50080 P04 | M-032091- RPLK9433      | 389658 UNQ9433   | 804     | 5.4726   | 0.2574   |
| 50080 P05 | M-031923- IQ motif co   | 389123 IQCF2     | 1160    | 7.931    | 2.201    |
| 50080 P06 | M-032085- FLJ43582 p    | 389649 FLJ43582  | 3223    | 5.9572   | 0.2272   |
| 50080 P07 | M-031907- musculoske    | 389125 MUSTN1    | 462     | 11.688   | 5.958    |
| 50080 P08 | M-032089- XK, Kell blo  | 389610 XKR5      | 1333    | 3.976    | 1.754    |
| 50080 P09 | M-031975- vestigial lik | 389136 VGLL3     | 1010    | 5.7426   | 0.0126   |
| 50080 P10 | M-031909- HWKM194       | 389558 UNQ1940   | 2682    | 9.0977   | 3.3677   |
| 50080 P11 | M-032082- FLJ46481 p    | 389197 FLJ46481  | 981     | 3.6697   | 2.0603   |
| 50080 P12 | M-031753- hypothetic    | 389458 LOC38945E | 1505    | 8.4385   | 2.7085   |
| 50080 P13 | M-031897- hypothetic    | 389199 LOC38919E | 1073    | 4.3802   | 1.3498   |
| 50080 P14 | M-031936- iodotyrosin   | 389434 IYD       | 1936    | 9.0393   | 3.3093   |
| 50080 P15 | M-027163- hypothetic    | 389203 LOC38920E | 3197    | 4.4417   | 1.2883   |
| 50080 P16 | M-032083- GDNF fami     | 389400 GFRAL     | 1557    | 5.3308   | 0.3992   |
| 50080 P17 | M-032079- coiled-coil   | 389206 CCDC4     | 840     | 9.881    | 4.151    |
| 50080 P18 | M-032086- AAAL3045      | 389383 RP3-51008 | 3769    | 1.4062   | 4.3238   |
| 50080 P19 | M-032084- transmemk     | 389208 TMPRSS11I | 2634    | 4.2141   | 1.5159   |
| 50080 P20 | M-031908- surfactant    | 389376 SFTPG     | 1847    | 4.4396   | 1.2904   |
| 50080 P21 | M-032081- FLJ27505 p    | 389320 FLJ27505  | 395     | 5.8228   | 0.0928   |
| 50080 P23 | M-031992- similar to A  | 389336 MGC23985  | 600     | 5.3333   | 0.3967   |
|           |                         | MAD              | 1280    | 5.73455  | 2.2311   |
|           |                         | MAD3             |         |          | 6.6933   |
|           |                         | MADc             |         |          | 3.302028 |
| 50080 C22 |                         |                  | 1195    | 30.544   |          |
| 50080 D22 |                         |                  | 725     | 21.241   |          |
| 50080 E22 |                         |                  | 1002    | 11.577   |          |
| 50080 F22 |                         |                  | 1289    | 28.239   |          |
|           |                         | mn               | 1052.75 | 22.90025 |          |

|                 |          |          |          |
|-----------------|----------|----------|----------|
|                 | sd       | 249.0279 | 8.522485 |
| 50080 G22       |          | 114      | 9.6491   |
| 50080 H22       |          | 233      | 7.2961   |
| 50080 I22       |          | 327      | 5.8104   |
| 50080 J22       |          | 208      | 5.2885   |
|                 | mn       | 220.5    | 7.011025 |
|                 | sd       | 87.55379 | 1.953569 |
| Z score NT2 neg | 3psSD    |          | 25.56746 |
|                 | 3ngSD    |          | 1.313097 |
|                 | SumSD    |          | 26.88055 |
|                 | MeanDf   |          | 17.83785 |
|                 | SumovrMn |          | 1.506939 |
|                 | 1minus   |          | -0.50694 |



| rZ       | cell ct | % inf   | AD      | rZ       | cell ct | % inf   | AD      | rZ       |
|----------|---------|---------|---------|----------|---------|---------|---------|----------|
| 0.247015 | 1190    | 2.605   | 1.105   | -0.33879 | 727     | 2.751   | 2.169   | -0.73319 |
| 0.002014 | 423     | 8.5106  | 4.8006  | 1.469744 | 581     | 7.5731  | 2.6531  | 0.896305 |
| 1.228624 | 464     | 6.25    | 2.54    | 0.777455 | 355     | 6.4789  | 1.5589  | 0.526551 |
| 1.377472 | 341     | 8.5044  | 4.7944  | 1.467846 | 287     | 15.679  | 10.759  | 3.63547  |
| 1.121962 | 700     | 7       | 3.29    | 1.007136 | 769     | 8.8427  | 3.9227  | 1.325331 |
| -0.19611 | 456     | 10.088  | 6.378   | 1.952809 | 340     | 7.0588  | 2.1388  | 0.722512 |
| 2.170923 | 222     | 30.18   | 26.47   | 8.105811 | 187     | 25.134  | 20.214  | 6.830525 |
| -0.15398 | 851     | 7.168   | 3.458   | 1.058585 | 395     | 7.5949  | 2.6749  | 0.903672 |
| 1.120357 | 579     | 5.5268  | 1.8168  | 0.555981 | 803     | 11.706  | 6.786   | 2.292904 |
| -0.31821 | 704     | 3.125   | 0.585   | -0.17955 | 592     | 4.0541  | 0.8659  | -0.29284 |
| -0.99543 | 351     | 6.5527  | 2.8427  | 0.870154 | 194     | 10.309  | 5.389   | 1.820827 |
| 0.606763 | 984     | 1.2195  | 2.4905  | -0.76309 | 877     | 4.7891  | 0.1309  | -0.04447 |
| 1.826287 | 658     | 3.7994  | 0.0894  | 0.02698  | 423     | 2.8369  | 2.0831  | -0.70416 |
| 4.08399  | 1112    | 6.9245  | 3.2145  | 0.984015 | 643     | 2.3328  | 2.5872  | -0.87451 |
| 2.400782 | 605     | 6.6116  | 2.9016  | 0.888192 | 284     | 8.8028  | 3.8828  | 1.311848 |
| 2.5092   | 470     | 16.383  | 12.673  | 3.880599 | 274     | 13.869  | 8.949   | 3.02383  |
| 1.410482 | 617     | 7.9417  | 4.2317  | 1.295524 | 447     | 8.7248  | 3.8048  | 1.28549  |
| 1.664265 | 916     | 10.262  | 6.552   | 2.006095 | 589     | 5.9423  | 1.0223  | 0.345221 |
| 2.952261 | 453     | 16.336  | 12.626  | 3.866206 | 202     | 13.366  | 8.446   | 2.853855 |
| 6.742962 | 462     | 3.4632  | 0.2468  | -0.07598 | 147     | 14.966  | 10.046  | 3.394531 |
| -1.29676 | 1254    | 0.7177  | 2.9923  | -0.91676 | 1067    | 2.5305  | 2.3895  | -0.8077  |
| -0.50486 | 789     | 1.3942  | 2.3158  | -0.70959 | 684     | 0.5848  | 4.3352  | -1.4652  |
| 0.608399 | 1062    | 4.1431  | 0.4331  | 0.132235 | 1264    | 0.23734 | 4.68266 | -1.58261 |
| -0.37603 | 768     | 1.1719  | 2.5381  | -0.77767 | 1040    | 0.19231 | 4.72769 | -1.59783 |
| -1.01987 | 975     | 4.6154  | 0.9054  | 0.276873 | 1087    | 1.104   | 3.816   | -1.28975 |
| -0.14487 | 1093    | 0.45746 | 3.25254 | -0.99646 | 762     | 0.26247 | 4.65753 | -1.57412 |
| -1.03547 | 1324    | 1.1329  | 2.5771  | -0.78961 | 673     | 1.4859  | 3.4341  | -1.1607  |
| 2.229372 | 1214    | 8.1549  | 4.4449  | 1.360814 | 1315    | 8.8973  | 3.9773  | 1.343782 |
| 1.240647 | 1413    | 4.2463  | 0.5363  | 0.163839 | 946     | 2.537   | 2.383   | -0.80551 |
| -0.22115 | 583     | 1.3722  | 2.3378  | -0.71633 | 897     | 4.0134  | 0.9066  | -0.3066  |
| 0.712971 | 1345    | 3.1227  | 0.5873  | -0.18025 | 817     | 0.1224  | 4.7976  | -1.62145 |
| 1.772683 | 859     | 5.1222  | 1.4122  | 0.432076 | 401     | 2.7431  | 2.1769  | -0.73586 |
| -0.11985 | 1234    | 3.9708  | 0.2608  | 0.07947  | 705     | 0.99291 | 3.92709 | -1.32729 |
| 1.137286 | 1365    | 4.0293  | 0.3193  | 0.097385 | 496     | 5.4435  | 0.5235  | 0.176666 |
| 0.751856 | 1048    | 5.8206  | 2.1106  | 0.645955 | 1428    | 3.4314  | 1.4886  | -0.50327 |
| 3.138511 | 1688    | 3.2583  | 0.4517  | -0.13873 | 1339    | 4.4063  | 0.5137  | -0.17383 |
| 0.026363 | 1190    | 3.1933  | 0.5167  | -0.15863 | 571     | 5.6042  | 0.6842  | 0.23097  |
| 1.058001 | 1389    | 5.3996  | 1.6896  | 0.517027 | 1445    | 3.045   | 1.875   | -0.63384 |
| -0.8882  | 1410    | 5.9574  | 2.2474  | 0.687849 | 1000    | 3.9     | 1.02    | -0.34492 |
| 3.409253 | 1163    | 9.8882  | 6.1782  | 1.891622 | 813     | 7.7491  | 2.8291  | 0.955779 |
| -0.60325 | 1642    | 5.7247  | 2.0147  | 0.616586 | 1288    | 1.3199  | 3.6001  | -1.21679 |
| 1.370203 | 460     | 11.739  | 8.029   | 2.458414 | 840     | 3.0952  | 1.8248  | -0.61688 |
| 0.538109 | 1165    | 10.386  | 6.676   | 2.044069 | 863     | 2.5492  | 2.3708  | -0.80138 |
| 1.062726 | 534     | 12.734  | 9.024   | 2.763124 | 488     | 1.0246  | 3.8954  | -1.31658 |
| 1.371415 | 2141    | 7.3797  | 3.6697  | 1.123416 | 1365    | 1.3919  | 3.5281  | -1.19246 |
| -0.10268 | 2279    | 2.9399  | 0.7701  | -0.23623 | 1932    | 0.05176 | 4.86824 | -1.64532 |

|          |      |         |         |          |      |         |         |          |
|----------|------|---------|---------|----------|------|---------|---------|----------|
| 1.827801 | 1614 | 8.9839  | 5.2739  | 1.614688 | 1140 | 4.0351  | 0.8849  | -0.29926 |
| 1.062726 | 1106 | 5.6962  | 1.9862  | 0.607859 | 1109 | 0.99188 | 3.92812 | -1.32764 |
| 2.128525 | 860  | 12.791  | 9.081   | 2.78058  | 556  | 4.3165  | 0.6035  | -0.20417 |
| 1.9129   | 1188 | 8.3333  | 4.6233  | 1.415448 | 1452 | 1.8595  | 3.0605  | -1.03445 |
| 2.749962 | 1511 | 7.4785  | 3.7685  | 1.153673 | 909  | 2.8603  | 2.0597  | -0.69626 |
| -0.08312 | 934  | 1.9272  | 1.7828  | -0.54637 | 1211 | 1.3212  | 3.5988  | -1.21635 |
| 5.787792 | 2199 | 13.37   | 9.66    | 2.957894 | 1578 | 7.0976  | 2.1776  | 0.735623 |
| 1.095524 | 1708 | 3.6885  | 0.0215  | -0.00698 | 1563 | 1.9834  | 2.9366  | -0.99258 |
| 5.08701  | 1600 | 7.9375  | 4.2275  | 1.294237 | 1530 | 4.6405  | 0.2795  | -0.09469 |
| 1.730891 | 1004 | 2.7888  | 0.9212  | -0.28251 | 1504 | 0.66489 | 4.25511 | -1.43813 |
| 1.670928 | 2322 | 6.0724  | 2.3624  | 0.723067 | 2166 | 5.9095  | 0.9895  | 0.334138 |
| -0.01249 | 2827 | 5.1645  | 1.4545  | 0.44503  | 2025 | 5.3827  | 0.4627  | 0.15612  |
| 0.716938 | 2181 | 7.3819  | 3.6719  | 1.12409  | 2764 | 7.3444  | 2.4244  | 0.819022 |
| -0.79465 | 738  | 6.5041  | 2.7941  | 0.855271 | 1184 | 12.416  | 7.496   | 2.532829 |
| -1.68433 | 1309 | 0.38197 | 3.32803 | -1.01958 | 1685 | 1.6024  | 3.3176  | -1.12133 |
| -1.06851 | 1577 | 0.95117 | 2.75883 | -0.84527 | 1488 | 1.6801  | 3.2399  | -1.09507 |
| -0.68038 | 3246 | 3.512   | 0.198   | -0.06103 | 2830 | 2.4735  | 2.4465  | -0.82696 |
| -0.79898 | 2028 | 3.0572  | 0.6528  | -0.20031 | 1500 | 1.6667  | 3.2533  | -1.0996  |
| -0.82723 | 1429 | 2.3793  | 1.3307  | -0.40791 | 1534 | 1.8253  | 3.0947  | -1.046   |
| -0.96412 | 2694 | 3.3408  | 0.3692  | -0.11346 | 1320 | 4.0152  | 0.9048  | -0.30599 |
| -1.03044 | 2748 | 1.4192  | 2.2908  | -0.70194 | 1045 | 1.6268  | 3.2932  | -1.11308 |
| -1.4403  | 1346 | 3.3432  | 0.3668  | -0.11273 | 1412 | 0.63739 | 4.28261 | -1.44743 |
| -0.7272  | 1001 | 4.3956  | 0.6856  | 0.209561 | 673  | 1.3373  | 3.5827  | -1.21091 |
| 0.461792 | 996  | 10.04   | 6.33    | 1.93811  | 1243 | 3.3789  | 1.5411  | -0.52101 |
| 0.034812 | 1452 | 2.135   | 1.575   | -0.48273 | 1698 | 2.179   | 2.741   | -0.92648 |
| 1.166086 | 1111 | 9.631   | 5.921   | 1.812857 | 597  | 1.1725  | 3.7475  | -1.2666  |
| 1.910175 | 2613 | 15.729  | 12.019  | 3.680317 | 1616 | 5.6312  | 0.7112  | 0.240094 |
| 1.585526 | 1045 | 10.526  | 6.816   | 2.086943 | 726  | 5.0964  | 0.1764  | 0.059373 |
| -0.02309 | 1698 | 5.1826  | 1.4726  | 0.450573 | 1256 | 2.0701  | 2.8499  | -0.96328 |
| 2.034038 | 612  | 6.8627  | 3.1527  | 0.965089 | 371  | 5.1213  | 0.2013  | 0.067787 |
| -0.74401 | 1882 | 3.2412  | 0.4688  | -0.14396 | 677  | 4.2836  | 0.6364  | -0.21529 |
| 0.770784 | 1754 | 8.3238  | 4.6138  | 1.412538 | 1154 | 4.9393  | 0.0193  | 0.006285 |
| 0.589713 | 1953 | 1.9457  | 1.7643  | -0.5407  | 1897 | 7.6964  | 2.7764  | 0.937971 |
| -0.21879 | 1620 | 3.4568  | 0.2532  | -0.07794 | 1927 | 2.8542  | 2.0658  | -0.69832 |
| -1.59509 | 1099 | 0.36397 | 3.34603 | -1.02509 | 1745 | 1.7765  | 3.1435  | -1.0625  |
| -1.23816 | 663  | 0.30166 | 3.40834 | -1.04417 | 482  | 2.6971  | 2.2229  | -0.7514  |
| -1.03674 | 1245 | 0.40161 | 3.30839 | -1.01356 | 1056 | 1.7992  | 3.1208  | -1.05482 |
| -1.05612 | 1755 | 1.1396  | 2.5704  | -0.78756 | 1343 | 4.7655  | 0.1545  | -0.05245 |
| -1.09604 | 1453 | 1.0323  | 2.6777  | -0.82042 | 1508 | 0.99469 | 3.92531 | -1.32669 |
| -1.22438 | 1916 | 0.26096 | 3.44904 | -1.05664 | 955  | 0.62827 | 4.29173 | -1.45051 |
| -1.20082 | 2047 | 1.8564  | 1.8536  | -0.56805 | 835  | 3.2335  | 1.6865  | -0.57014 |
| -1.27499 | 2115 | 1.2293  | 2.4807  | -0.76009 | 1102 | 2.9946  | 1.9254  | -0.65087 |
| -1.15428 | 1676 | 0.59666 | 3.11334 | -0.95383 | 1151 | 2.954   | 1.966   | -0.66459 |
| 0.493954 | 1493 | 1.5405  | 2.1695  | -0.66479 | 2075 | 4.0964  | 0.8236  | -0.27855 |
| -0.73084 | 947  | 2.6399  | 1.0701  | -0.32811 | 1207 | 2.8998  | 2.0202  | -0.68291 |
| -1.05422 | 1630 | 4.0491  | 0.3391  | 0.103448 | 1387 | 4.9748  | 0.0548  | 0.018282 |
| -1.3802  | 1733 | 3.2314  | 0.4786  | -0.14697 | 1753 | 2.4529  | 2.4671  | -0.83392 |

|          |      |         |         |          |      |         |         |          |
|----------|------|---------|---------|----------|------|---------|---------|----------|
| -0.66    | 1064 | 2.4436  | 1.2664  | -0.38822 | 896  | 3.9062  | 1.0138  | -0.34282 |
| -1.14543 | 1447 | 0.13822 | 3.57178 | -1.09422 | 1210 | 3.1405  | 1.7795  | -0.60157 |
| -0.54968 | 1493 | 2.8801  | 0.8299  | -0.25455 | 1616 | 7.302   | 2.382   | 0.804694 |
| -0.9855  | 2126 | 1.6463  | 2.0637  | -0.63239 | 1970 | 5.8883  | 0.9683  | 0.326974 |
| -0.16722 | 2092 | 2.6291  | 1.0809  | -0.33141 | 1712 | 10.748  | 5.828   | 1.969175 |
| -0.18972 | 1565 | 2.6198  | 1.0902  | -0.33426 | 1439 | 8.2696  | 3.3496  | 1.131668 |
| -1.22626 | 1335 | 2.0225  | 1.6875  | -0.51718 | 1663 | 4.2093  | 0.7107  | -0.2404  |
| -1.27075 | 747  | 1.4726  | 2.2374  | -0.68558 | 603  | 2.3217  | 2.5983  | -0.87826 |
| 0.3753   | 836  | 3.3493  | 0.3607  | -0.11086 | 825  | 3.2727  | 1.6473  | -0.5569  |
| -0.32951 | 743  | 1.0767  | 2.6333  | -0.80682 | 1406 | 2.3471  | 2.5729  | -0.86968 |
| 0.270425 | 1357 | 2.6529  | 1.0571  | -0.32413 | 1438 | 2.0862  | 2.8338  | -0.95784 |
| -0.13112 | 578  | 2.5952  | 1.1148  | -0.3418  | 611  | 6.383   | 1.463   | 0.494144 |
| -0.45295 | 1069 | 2.9935  | 0.7165  | -0.21982 | 445  | 5.618   | 0.698   | 0.235633 |
| -0.62357 | 1129 | 1.5058  | 2.2042  | -0.67542 | 1312 | 2.7439  | 2.1761  | -0.73559 |
| -1.1411  | 1154 | 2.253   | 1.457   | -0.44659 | 577  | 5.5459  | 0.6259  | 0.211269 |
| -0.4293  | 1452 | 2.4793  | 1.2307  | -0.37729 | 1497 | 4.9432  | 0.0232  | 0.007603 |
| -0.2177  | 507  | 0.78895 | 2.92105 | -0.89494 | 382  | 4.712   | 0.208   | -0.07052 |
| -0.25604 | 1098 | 3.7341  | 0.0241  | 0.006982 | 1043 | 4.8897  | 0.0303  | -0.01048 |
| 0.02927  | 833  | 5.6423  | 1.9323  | 0.591352 | 535  | 5.0467  | 0.1267  | 0.042578 |
| -0.65277 | 987  | 3.6474  | 0.0626  | -0.01957 | 775  | 2.7097  | 2.2103  | -0.74715 |
| 0.270637 | 1440 | 3.6111  | 0.0989  | -0.03069 | 662  | 5.287   | 0.367   | 0.123781 |
| -0.48063 | 844  | 6.6351  | 2.9251  | 0.895389 | 385  | 5.1948  | 0.2748  | 0.092625 |
| -0.07491 | 1238 | 4.4426  | 0.7326  | 0.223954 | 1125 | 0.88889 | 4.03111 | -1.36244 |
| 0.451374 | 1641 | 3.9001  | 0.1901  | 0.057818 | 1210 | 3.6364  | 1.2836  | -0.43399 |
| 0.925689 | 1752 | 10.103  | 6.393   | 1.957403 | 730  | 4.3836  | 0.5364  | -0.1815  |
| -0.50819 | 1240 | 4.1129  | 0.4029  | 0.122987 | 1532 | 7.8982  | 2.9782  | 1.006164 |
| -0.35719 | 799  | 9.2616  | 5.5516  | 1.699732 | 1968 | 2.3882  | 2.5318  | -0.85579 |
| -1.26421 | 1729 | 0.4627  | 3.2473  | -0.99486 | 1690 | 1.3609  | 3.5591  | -1.20294 |
| 0.135659 | 634  | 1.2618  | 2.4482  | -0.75014 | 475  | 4.4211  | 0.4989  | -0.16883 |
| -0.04481 | 786  | 2.4173  | 1.2927  | -0.39628 | 854  | 3.63    | 1.29    | -0.43616 |
| -0.24814 | 594  | 1.3468  | 2.3632  | -0.72411 | 1624 | 4.3103  | 0.6097  | -0.20627 |
| -1.31357 | 879  | 1.0239  | 2.6861  | -0.82299 | 2031 | 3.1019  | 1.8181  | -0.61461 |
| -0.73638 | 494  | 3.6437  | 0.0663  | -0.0207  | 828  | 1.6908  | 3.2292  | -1.09146 |
| 0.282296 | 692  | 5.0578  | 1.3478  | 0.412354 | 532  | 4.3233  | 0.5967  | -0.20187 |
| -0.64204 | 855  | 6.0819  | 2.3719  | 0.725976 | 1298 | 3.3898  | 1.5302  | -0.51733 |
| 0.240049 | 871  | 4.0184  | 0.3084  | 0.094047 | 1563 | 5.5022  | 0.5822  | 0.196502 |
| -0.09505 | 770  | 4.6753  | 0.9653  | 0.295217 | 1141 | 4.908   | 0.012   | -0.00429 |
| 0.839378 | 580  | 12.931  | 9.221   | 2.823454 | 1030 | 7.6699  | 2.7499  | 0.929016 |
| -0.69762 | 789  | 8.4918  | 4.7818  | 1.463987 | 626  | 3.3546  | 1.5654  | -0.52922 |
| -1.40312 | 1755 | 12.251  | 8.541   | 2.61521  | 2223 | 11.876  | 6.956   | 2.350351 |
| -0.5561  | 1657 | 8.0266  | 4.3166  | 1.321523 | 1270 | 4.9606  | 0.0406  | 0.013483 |
| -1.23292 | 1160 | 6.0345  | 2.3245  | 0.71146  | 1535 | 5.2769  | 0.3569  | 0.120368 |
| -0.54626 | 1043 | 5.3691  | 1.6591  | 0.507687 | 1135 | 6.5198  | 1.5998  | 0.540372 |
| -0.81897 | 901  | 15.316  | 11.606  | 3.553839 | 913  | 9.4195  | 4.4995  | 1.520245 |
| -0.09493 | 767  | 10.821  | 7.111   | 2.177284 | 854  | 4.918   | 0.002   | -0.00091 |
| -1.18883 | 1830 | 6.1749  | 2.4649  | 0.754456 | 1596 | 6.015   | 1.095   | 0.369788 |
| -0.58441 | 1419 | 6.9063  | 3.1963  | 0.978441 | 1363 | 1.6141  | 3.3059  | -1.11737 |

|          |      |          |          |          |      |         |         |          |
|----------|------|----------|----------|----------|------|---------|---------|----------|
| 0.023243 | 255  | 4.3137   | 0.6037   | 0.18448  | 297  | 18.182  | 13.262  | 4.481289 |
| 4.808999 | 360  | 5.5556   | 1.8456   | 0.564801 | 440  | 18.182  | 13.262  | 4.481289 |
| 0.991345 | 1051 | 2.9496   | 0.7604   | -0.23326 | 563  | 7.2824  | 2.3624  | 0.798071 |
| 0.276906 | 931  | 2.6853   | 1.0247   | -0.3142  | 1907 | 7.3414  | 2.4214  | 0.818009 |
| 1.739068 | 733  | 3.6835   | 0.0265   | -0.00851 | 1036 | 9.2664  | 4.3464  | 1.468509 |
| 1.045766 | 486  | 1.4403   | 2.2697   | -0.69547 | 689  | 0.87083 | 4.04917 | -1.36854 |
| 0.17409  | 1536 | 7.487    | 3.777    | 1.156276 | 1865 | 8.4718  | 3.5518  | 1.199996 |
| 0.42854  | 1127 | 3.638    | 0.072    | -0.02245 | 1221 | 3.8493  | 1.0707  | -0.36205 |
| 1.053762 | 1506 | 4.0505   | 0.3405   | 0.103877 | 1387 | 2.5234  | 2.3966  | -0.8101  |
| -0.25495 | 727  | 0.55021  | 3.15979  | -0.96806 | 1295 | 3.5521  | 1.3679  | -0.46248 |
| 0.492864 | 568  | 4.2254   | 0.5154   | 0.157439 | 909  | 4.9505  | 0.0305  | 0.01007  |
| 1.226534 | 461  | 13.883   | 10.173   | 3.114995 | 867  | 9.9193  | 4.9993  | 1.689139 |
| 0.332266 | 757  | 10.172   | 6.462    | 1.978534 | 1218 | 10.673  | 5.753   | 1.943831 |
| 1.240919 | 549  | 3.643    | 0.067    | -0.02092 | 847  | 7.0838  | 2.1638  | 0.73096  |
| 0.036235 | 795  | 3.7736   | 0.0636   | 0.019079 | 1432 | 9.148   | 4.228   | 1.428499 |
| 1.21975  | 1049 | 8.8656   | 5.1556   | 1.57846  | 914  | 4.9234  | 0.0034  | 0.000912 |
| -0.1465  | 383  | 7.8329   | 4.1229   | 1.262204 | 958  | 3.4447  | 1.4753  | -0.49877 |
| -0.13163 | 619  | 8.4006   | 4.6906   | 1.436058 | 1046 | 6.4054  | 1.4854  | 0.501713 |
| 0.612124 | 870  | 6.6667   | 2.9567   | 0.905066 | 681  | 4.5521  | 0.3679  | -0.12456 |
| -0.47003 | 798  | 4.386    | 0.676    | 0.206621 | 902  | 1.7738  | 3.1462  | -1.06341 |
| 0.728325 | 184  | 8.1522   | 4.4422   | 1.359987 | 197  | 3.5533  | 1.3667  | -0.46207 |
| 2.199694 | 206  | 7.2816   | 3.5716   | 1.093374 | 625  | 6.72    | 1.8     | 0.608024 |
| -0.84356 | 485  | 3.5052   | 0.2048   | -0.06312 | 236  | 8.4746  | 3.5546  | 1.200942 |
| -0.02073 | 1112 | 5.2158   | 1.5058   | 0.46074  | 754  | 3.3156  | 1.6044  | -0.5424  |
| 0.526207 | 413  | 15.496   | 11.786   | 3.608963 | 763  | 7.9948  | 3.0748  | 1.038807 |
| -0.3965  | 495  | 11.919   | 8.209    | 2.513537 | 374  | 4.5455  | 0.3745  | -0.12679 |
| 0.023243 | 1142 | 8.8441   | 5.1341   | 1.571876 | 1761 | 6.7007  | 1.7807  | 0.601502 |
| -1.00964 | 608  | 12.829   | 9.119    | 2.792217 | 356  | 5.618   | 0.698   | 0.235633 |
| 0.228511 | 1701 | 13.345   | 9.635    | 2.950238 | 837  | 5.4958  | 0.5758  | 0.194339 |
| -0.53862 | 423  | 20.095   | 16.385   | 5.017367 | 642  | 9.9688  | 5.0488  | 1.705866 |
| 1.149036 | 369  | 23.577   | 19.867   | 6.083699 | 738  | 12.195  | 7.275   | 2.458148 |
| 0.920238 | 442  | 13.348   | 9.638    | 2.951156 | 895  | 5.5866  | 0.6666  | 0.225022 |
| 0.559156 | 977  | 7.8813   | 4.1713   | 1.277027 | 1276 | 4.1536  | 0.7664  | -0.25922 |
| 0.209614 | 399  | 22.306   | 18.596   | 5.694467 | 892  | 10.65   | 5.73    | 1.936058 |
| -1.02542 | 547  | 14.077   | 10.367   | 3.174406 | 466  | 9.2275  | 4.3075  | 1.455364 |
| 0.641015 | 810  | 18.765   | 15.055   | 4.610066 | 1068 | 18.165  | 13.245  | 4.475545 |
| 1.332651 | 1368 | 19.079   | 15.369   | 4.706226 | 925  | 9.0811  | 4.1611  | 1.405892 |
| 0.152164 | 1823 | 10.971   | 7.261    | 2.223221 | 1392 | 7.0402  | 2.1202  | 0.716226 |
| 0.307856 | 823  | 9.9635   | 6.2535   | 1.914682 | 1048 | 5.916   | 0.996   | 0.336334 |
| -0.04111 | 318  | 12.893   | 9.183    | 2.811817 | 443  | 6.5463  | 1.6263  | 0.549327 |
| -1.38362 | 1140 | 0.087719 | 3.622281 | -1.10969 | 796  | 7.9146  | 2.9946  | 1.011706 |
| -0.71512 | 1017 | 2.0649   | 1.6451   | -0.5042  | 510  | 3.5294  | 1.3906  | -0.47015 |
| 0.192715 | 1292 | 2.322    | 1.388    | -0.42546 | 941  | 3.8257  | 1.0943  | -0.37002 |
| 0.101407 | 1167 | 2.6564   | 1.0536   | -0.32305 | 1583 | 4.3588  | 0.5612  | -0.18988 |
| -0.12582 | 412  | 1.9417   | 1.7683   | -0.54192 | 446  | 5.8296  | 0.9096  | 0.307138 |
| -0.67778 | 487  | 3.9014   | 0.1914   | 0.058216 | 590  | 3.2203  | 1.6997  | -0.5746  |
| 0.690591 | 1502 | 6.5912   | 2.8812   | 0.881945 | 675  | 5.1852  | 0.2652  | 0.08938  |

|          |      |         |         |          |      |         |         |          |
|----------|------|---------|---------|----------|------|---------|---------|----------|
| -1.53433 | 899  | 3.2258  | 0.4842  | -0.14868 | 614  | 10.261  | 5.341   | 1.804607 |
| 0.399164 | 1214 | 7.084   | 3.374   | 1.03286  | 1246 | 3.8523  | 1.0677  | -0.36104 |
| -0.8445  | 787  | 4.4473  | 0.7373  | 0.225394 | 877  | 6.2714  | 1.3514  | 0.456432 |
| 0.782019 | 431  | 2.7842  | 0.9258  | -0.28392 | 513  | 13.06   | 8.14    | 2.750451 |
| 0.012129 | 442  | 5.2036  | 1.4936  | 0.457004 | 743  | 10.229  | 5.309   | 1.793793 |
| 0.062401 | 592  | 6.25    | 2.54    | 0.777455 | 670  | 5.6716  | 0.7516  | 0.253746 |
| -1.04758 | 443  | 4.7404  | 1.0304  | 0.315153 | 1180 | 5       | 0.08    | 0.026797 |
| 0.917724 | 356  | 3.0899  | 0.6201  | -0.1903  | 609  | 9.3596  | 4.4396  | 1.500003 |
| 0.46582  | 999  | 1.5015  | 2.2085  | -0.67673 | 1382 | 6.4399  | 1.5199  | 0.513372 |
| 2.066745 | 723  | 5.9474  | 2.2374  | 0.684786 | 1356 | 4.4985  | 0.4215  | -0.14267 |
| 0.612669 | 873  | 4.4674  | 0.7574  | 0.231549 | 937  | 5.8698  | 0.9498  | 0.320722 |
| -0.24456 | 811  | 8.1381  | 4.4281  | 1.355669 | 902  | 11.973  | 7.053   | 2.38313  |
| 0.134569 | 510  | 6.4706  | 2.7606  | 0.845012 | 951  | 7.1504  | 2.2304  | 0.753465 |
| -0.77975 | 1126 | 1.2433  | 2.4667  | -0.7558  | 1636 | 1.956   | 2.964   | -1.00184 |
| -0.01382 | 888  | 1.5766  | 2.1334  | -0.65373 | 1032 | 6.2016  | 1.2816  | 0.432845 |
| 0.624904 | 1576 | 2.2843  | 1.4257  | -0.43701 | 1947 | 3.0303  | 1.8897  | -0.63881 |
| -0.52606 | 1952 | 1.793   | 1.917   | -0.58746 | 2195 | 2.1868  | 2.7332  | -0.92385 |
| -0.54701 | 623  | 1.6051  | 2.1049  | -0.64501 | 2443 | 6.8768  | 1.9568  | 0.66101  |
| 1.151035 | 427  | 8.6651  | 4.9551  | 1.517059 | 1062 | 2.6365  | 2.2835  | -0.77188 |
| -0.08911 | 997  | 3.2096  | 0.5004  | -0.15364 | 1706 | 0.87925 | 4.04075 | -1.3657  |
| 0.189868 | 1076 | 2.4164  | 1.2936  | -0.39655 | 1077 | 3.4355  | 1.4845  | -0.50188 |
| 0.098046 | 470  | 2.9787  | 0.7313  | -0.22435 | 777  | 6.9498  | 2.0298  | 0.685678 |
| 1.111665 | 965  | 2.7979  | 0.9121  | -0.27972 | 1190 | 1.0084  | 3.9116  | -1.32205 |
| 1.497701 | 730  | 3.9726  | 0.2626  | 0.080021 | 1183 | 1.6906  | 3.2294  | -1.09152 |
| 0.365033 | 564  | 5.4965  | 1.7865  | 0.546702 | 1340 | 5.8209  | 0.9009  | 0.304198 |
| 1.202034 | 525  | 7.619   | 3.909   | 1.196699 | 1454 | 2.3384  | 2.5816  | -0.87262 |
| 2.411079 | 811  | 9.3711  | 5.6611  | 1.733265 | 1353 | 2.6608  | 2.2592  | -0.76367 |
| 0.627872 | 537  | 8.0074  | 4.2974  | 1.315644 | 2152 | 7.0167  | 2.0967  | 0.708285 |
| 0.818876 | 1157 | 5.5315  | 1.8215  | 0.557421 | 1628 | 2.2113  | 2.7087  | -0.91557 |
| 0.633141 | 753  | 9.9602  | 6.2502  | 1.913672 | 1476 | 2.5068  | 2.4132  | -0.81571 |
| -0.38275 | 745  | 4.2953  | 0.5853  | 0.178845 | 1766 | 1.8686  | 3.0514  | -1.03137 |
| 0.467697 | 1085 | 12.903  | 9.193   | 2.814879 | 2023 | 3.2625  | 1.6575  | -0.56034 |
| 1.155123 | 1450 | 9.1034  | 5.3934  | 1.651284 | 1339 | 3.1367  | 1.7833  | -0.60285 |
| -1.3358  | 800  | 0.625   | 3.085   | -0.94515 | 1455 | 3.5052  | 1.4148  | -0.47833 |
| 0.880353 | 1554 | 3.9897  | 0.2797  | 0.085258 | 1733 | 6.8667  | 1.9467  | 0.657597 |
| -0.35362 | 1092 | 0.7326  | 2.9774  | -0.9122  | 2432 | 5.3043  | 0.3843  | 0.129627 |
| -0.05032 | 915  | 0.54645 | 3.16355 | -0.96921 | 2043 | 3.3774  | 1.5426  | -0.52152 |
| -0.26876 | 949  | 2.2129  | 1.4971  | -0.45887 | 1512 | 10.053  | 5.133   | 1.734319 |
| -0.818   | 1458 | 1.5775  | 2.1325  | -0.65346 | 1147 | 1.2206  | 3.6994  | -1.25035 |
| 1.183137 | 776  | 2.4485  | 1.2615  | -0.38672 | 580  | 16.552  | 11.632  | 3.930476 |
| 1.189981 | 547  | 2.1938  | 1.5162  | -0.46472 | 586  | 23.549  | 18.629  | 6.294918 |
| -0.61985 | 1562 | 0.89629 | 2.81371 | -0.86207 | 1870 | 3.4225  | 1.4975  | -0.50628 |
| 0.602887 | 528  | 1.3258  | 2.3842  | -0.73054 | 976  | 8.9139  | 3.9939  | 1.349391 |
| 0.245834 | 1210 | 1.157   | 2.553   | -0.78223 | 1245 | 3.3735  | 1.5465  | -0.52283 |
| 0.50419  | 1457 | 3.3631  | 0.3469  | -0.10663 | 1467 | 3.7491  | 1.1709  | -0.39591 |
| -0.62872 | 1047 | 4.8711  | 1.1611  | 0.355179 | 1100 | 3.4545  | 1.4655  | -0.49546 |
| 0.656551 | 1126 | 0.8881  | 2.8219  | -0.86458 | 1229 | 5.3702  | 0.4502  | 0.151896 |

|          |      |         |         |          |      |        |        |          |
|----------|------|---------|---------|----------|------|--------|--------|----------|
| -0.40059 | 651  | 0.92166 | 2.78834 | -0.8543  | 1269 | 5.2009 | 0.2809 | 0.094686 |
| -1.28044 | 1012 | 2.2727  | 1.4373  | -0.44056 | 1977 | 3.4901 | 1.4299 | -0.48343 |
| -0.32151 | 887  | 4.6223  | 0.9123  | 0.278986 | 1482 | 6.0729 | 1.1529 | 0.389354 |
| -0.00201 | 1008 | 3.5714  | 0.1386  | -0.04284 | 1695 | 5.3687 | 0.4487 | 0.151389 |
| -0.04808 | 1489 | 5.7085  | 1.9985  | 0.611625 | 1200 | 5.8333 | 0.9133 | 0.308388 |
| 0.381296 | 1956 | 3.5276  | 0.1824  | -0.05626 | 1233 | 7.4615 | 2.5415 | 0.858593 |
| 0.042656 | 1127 | 0.97604 | 2.73396 | -0.83765 | 945  | 2.8571 | 2.0629 | -0.69734 |
| 0.53084  | 559  | 0.35778 | 3.35222 | -1.02699 | 849  | 5.1826 | 0.2626 | 0.088502 |
| -0.02    | 1624 | 1.8473  | 1.8627  | -0.57083 | 1630 | 5.0307 | 0.1107 | 0.037171 |
| 2.076436 | 1443 | 0.9009  | 2.8091  | -0.86066 | 1678 | 11.561 | 6.641  | 2.243906 |
| -0.55746 | 1514 | 0.7926  | 2.9174  | -0.89383 | 1945 | 4.7301 | 0.1899 | -0.06441 |
| 0.537352 | 2235 | 3.0872  | 0.6228  | -0.19113 | 1606 | 6.538  | 1.618  | 0.546522 |
| 1.785706 | 1510 | 3.3775  | 0.3325  | -0.10222 | 1717 | 5.0087 | 0.0887 | 0.029737 |
| 3.250563 | 2000 | 9.2     | 5.49    | 1.680867 | 1636 | 5.868  | 0.948  | 0.320114 |
| -0.33021 | 705  | 2.8369  | 0.8731  | -0.26778 | 1197 | 5.5138 | 0.5938 | 0.200422 |
| 0.865665 | 965  | 2.0725  | 1.6375  | -0.50187 | 865  | 3.9306 | 0.9894 | -0.33458 |
| 3.272973 | 2238 | 9.4727  | 5.7627  | 1.764379 | 2967 | 6.2353 | 1.3153 | 0.444233 |
| -0.7643  | 1183 | 1.3525  | 2.3575  | -0.72236 | 1212 | 3.1353 | 1.7847 | -0.60333 |
| 0.268608 | 2203 | 2.3604  | 1.3496  | -0.4137  | 2142 | 2.9412 | 1.9788 | -0.66892 |
| 1.876559 | 986  | 1.3185  | 2.3915  | -0.73277 | 903  | 5.0941 | 0.1741 | 0.058596 |
| 0.255888 | 1313 | 2.2087  | 1.5013  | -0.46016 | 946  | 3.6998 | 1.2202 | -0.41257 |
| 0.187476 | 1123 | 2.6714  | 1.0386  | -0.31846 | 1407 | 5.6148 | 0.6948 | 0.234552 |
| 3.936808 | 875  | 7.0857  | 3.3757  | 1.033381 | 771  | 13.23  | 8.31   | 2.807898 |
| 0.542924 | 1274 | 3.2967  | 0.4133  | -0.12697 | 1336 | 4.2665 | 0.6535 | -0.22107 |
| 2.669405 | 2880 | 8.5417  | 4.8317  | 1.479268 | 3282 | 9.1408 | 4.2208 | 1.426066 |
| 0.856277 | 1814 | 4.8512  | 1.1412  | 0.349085 | 1459 | 3.9753 | 0.9447 | -0.31947 |
| -0.99886 | 2360 | 0.55085 | 3.15915 | -0.96786 | 1788 | 3.8591 | 1.0609 | -0.35874 |
| -0.33342 | 2927 | 1.1616  | 2.5484  | -0.78082 | 1563 | 6.206  | 1.286  | 0.434332 |
| 0.451404 | 1664 | 2.4639  | 1.2461  | -0.38201 | 2562 | 14.481 | 9.561  | 3.230639 |
| -1.27444 | 1348 | 1.0386  | 2.6714  | -0.81849 | 1071 | 8.1232 | 3.2032 | 1.082196 |
| -0.74852 | 1820 | 1.5385  | 2.1715  | -0.6654  | 2001 | 5.1974 | 0.2774 | 0.093503 |
| -1.32896 | 1241 | 1.2087  | 2.5013  | -0.7664  | 882  | 8.5034 | 3.5834 | 1.210674 |
| -0.96509 | 1068 | 0.37453 | 3.33547 | -1.02186 | 865  | 9.1329 | 4.2129 | 1.423396 |
| -0.42539 | 2509 | 3.2284  | 0.4816  | -0.14788 | 1421 | 5.4187 | 0.4987 | 0.168285 |
| 0.824872 | 2198 | 3.3212  | 0.3888  | -0.11946 | 1264 | 8.5443 | 3.6243 | 1.224495 |
| 0.413821 | 1968 | 2.439   | 1.271   | -0.38963 | 1180 | 3.4746 | 1.4454 | -0.48867 |
| -0.05095 | 1503 | 5.3892  | 1.6792  | 0.513842 | 1140 | 8.4211 | 3.5011 | 1.182863 |
| 0.857791 | 673  | 3.1204  | 0.5896  | -0.18096 | 1859 | 7.1544 | 2.2344 | 0.754817 |
| -0.56733 | 1126 | 2.5755  | 1.1345  | -0.34783 | 847  | 7.438  | 2.518  | 0.850652 |
| -0.09414 | 454  | 1.7621  | 1.9479  | -0.59693 | 772  | 3.6269 | 1.2931 | -0.4372  |
| 0.137749 | 1258 | 4.6105  | 0.9005  | 0.275372 | 1409 | 4.8971 | 0.0229 | -0.00797 |
| -0.23781 | 1375 | 2.4     | 1.31    | -0.40157 | 1450 | 5.1724 | 0.2524 | 0.085055 |
| 1.334165 | 1391 | 5.1042  | 1.3942  | 0.426564 | 2232 | 6.6308 | 1.7108 | 0.577881 |
| -0.45822 | 1241 | 4.4319  | 0.7219  | 0.220678 | 2248 | 2.4911 | 2.4289 | -0.82102 |
| 1.24313  | 1947 | 3.2357  | 0.4743  | -0.14565 | 706  | 8.9235 | 4.0035 | 1.352635 |
| 0.141716 | 1070 | 7.8505  | 4.1405  | 1.267594 | 781  | 10.371 | 5.451  | 1.841778 |
| -0.67633 | 992  | 1.0081  | 2.7019  | -0.82783 | 1216 | 8.3882 | 3.4682 | 1.171746 |

|          |          |         |          |          |        |        |         |          |
|----------|----------|---------|----------|----------|--------|--------|---------|----------|
| -0.09032 | 999      | 2.002   | 1.708    | -0.52346 | 1154   | 7.3657 | 2.4457  | 0.82622  |
| -1.46361 | 991      | 0.50454 | 3.20546  | -0.98204 | 1334   | 2.9985 | 1.9215  | -0.64955 |
| -0.71891 | 1055     | 2.5592  | 1.1508   | -0.35282 | 1280   | 3.75   | 1.17    | -0.39561 |
| -1.44074 | 991      | 1.9173  | 1.7927   | -0.5494  | 922    | 4.2299 | 0.6901  | -0.23344 |
| -1.21566 | 776      | 1.0309  | 2.6791   | -0.82085 | 652    | 7.5153 | 2.5953  | 0.876773 |
| -1.06118 | 452      | 0.66372 | 3.04628  | -0.9333  | 670    | 8.0597 | 3.1397  | 1.060738 |
| -0.90067 | 479      | 3.5491  | 0.1609   | -0.04967 | 1129   | 4.783  | 0.137   | -0.04653 |
| -0.10568 | 604      | 2.4834  | 1.2266   | -0.37603 | 849    | 8.1272 | 3.2072  | 1.083548 |
| -0.8882  | 386      | 8.5492  | 4.8392   | 1.481565 | 852    | 12.559 | 7.639   | 2.581152 |
| -0.60237 | 1224     | 4.2484  | 0.5384   | 0.164482 | 891    | 4.6016 | 0.3184  | -0.10783 |
| -0.10341 | 877      | 3.6488  | 0.0612   | -0.01914 | 1384   | 6.2139 | 1.2939  | 0.437001 |
| -0.31888 | 1080     | 4.4444  | 0.7344   | 0.224506 | 949    | 9.1675 | 4.2475  | 1.435089 |
| 0.834654 | 887      | 6.4262  | 2.7162   | 0.831415 | 1151   | 16.073 | 11.153  | 3.768611 |
| -1.33229 | 823      | 5.5893  | 1.8793   | 0.575121 | 2400   | 5.9583 | 1.0383  | 0.350628 |
| -0.18224 | 839      | 7.5089  | 3.7989   | 1.162982 | 1319   | 5.4587 | 0.5387  | 0.181802 |
| -0.25174 | 1276     | 9.4044  | 5.6944   | 1.743463 | 2016   | 6.2996 | 1.3796  | 0.465961 |
| 1.478016 | 1363     | 10.271  | 6.561    | 2.008852 | 848    | 9.434  | 4.514   | 1.525145 |
| -0.31073 | 480      | 12.917  | 9.207    | 2.819166 | 257    | 5.4475 | 0.5275  | 0.178017 |
| 1.79146  | 714      | 14.986  | 11.276   | 3.45278  | 378    | 11.905 | 6.985   | 2.360151 |
| -0.52927 | 1232     | 0.32468 | 3.38532  | -1.03712 | 1644   | 2.129  | 2.791   | -0.94338 |
| -0.07933 | 1535     | 1.3681  | 2.3419   | -0.71758 | 745    | 3.2215 | 1.6985  | -0.5742  |
| 0.665182 | 2053     | 3.6532  | 0.0568   | -0.01779 | 1733   | 3.4045 | 1.5155  | -0.51236 |
| 0.067428 | 1388     | 1.8732  | 1.8368   | -0.5629  | 3840   | 4.375  | 0.545   | -0.1844  |
| 1.802968 | 427      | 0.93677 | 2.77323  | -0.84968 | 339    | 11.209 | 6.289   | 2.124957 |
| -0.53257 | 620      | 1.9355  | 1.7745   | -0.54382 | 552    | 6.5217 | 1.6017  | 0.541014 |
| 0.002438 | 1201     | 1.582   | 2.128    | -0.65208 | 1044   | 3.4483 | 1.4717  | -0.49756 |
| 1.01851  | 1847     | 3.4651  | 0.2449   | -0.0754  | 3615   | 4.592  | 0.328   | -0.11108 |
| -0.62533 | 1812     | 3.4216  | 0.2884   | -0.08872 | 2065   | 2.3729 | 2.5471  | -0.86096 |
| 0.818876 | 1589     | 1.9509  | 1.7591   | -0.53911 | 1434   | 7.2524 | 2.3324  | 0.787933 |
| -0.41016 | 1959     | 10.975  | 7.265    | 2.224446 | 1568   | 3.5077 | 1.4123  | -0.47748 |
| 1.000824 | 892      | 2.8027  | 0.9073   | -0.27825 | 2246   | 5.1202 | 0.2002  | 0.067416 |
| -0.39153 | 2037     | 5.2528  | 1.5428   | 0.472071 | 2453   | 3.139  | 1.781   | -0.60208 |
| -0.12227 | 1648     | 5.1578  | 1.4478   | 0.442978 | 1287   | 3.4188 | 1.5012  | -0.50753 |
| 1.255728 | 589      | 7.3005  | 3.5905   | 1.099162 | 1167   | 5.3128 | 0.3928  | 0.132499 |
| -1.31082 | 893      | 3.3595  | 0.3505   | -0.10774 | 3045   | 2.2332 | 2.6868  | -0.90817 |
| -0.46046 | 2031     | 4.3328  | 0.6228   | 0.190329 | 2278   | 3.6874 | 1.2326  | -0.41676 |
| -0.39217 | 1804     | 4.7118  | 1.0018   | 0.306395 | 2684   | 5.924  | 1.004   | 0.339037 |
| 0.026726 | 565      | 11.858  | 8.148    | 2.494857 | 793    | 8.9533 | 4.0333  | 1.362706 |
| -0.12152 | 322      | 6.8323  | 3.1223   | 0.955779 | 394    | 10.406 | 5.486   | 1.853605 |
|          | 1058.5   | 3.7113  | 2.20635  |          | 1140.5 | 4.9207 | 1.9995  |          |
|          |          |         | 6.61905  |          |        |        | 5.9985  |          |
|          |          |         | 3.265398 |          |        |        | 2.95926 |          |
| 1534     | 19.296   |         | 1487     | 25.286   |        |        |         |          |
| 2439     | 25.256   |         | 1857     | 24.448   |        |        |         |          |
| 2490     | 29.598   |         | 2130     | 31.221   |        |        |         |          |
| 2068     | 28.143   |         | 1968     | 28.608   |        |        |         |          |
| 2132.75  | 25.57325 |         | 1860.5   | 27.39075 |        |        |         |          |

|          |          |          |          |
|----------|----------|----------|----------|
| 441.2523 | 4.557292 | 273.0696 | 3.122086 |
| 576      | 6.9444   | 506      | 4.9407   |
| 377      | 6.1008   | 407      | 5.4054   |
| 235      | 12.34    | 423      | 10.638   |
| 296      | 10.473   | 307      | 13.681   |
| 371      | 8.96455  | 410.75   | 8.666275 |
| 148.5283 | 2.941154 | 81.65119 | 4.224862 |
|          | 13.67188 |          | 9.366258 |
|          | 0.353412 |          | 7.949012 |
|          | 14.02529 |          | 17.31527 |
|          | 21.90025 |          | 23.31535 |
|          | 0.640417 |          | 0.742655 |
|          | 0.359583 |          | 0.257345 |



x toxic a,b,c

x toxic a,b,c

x toxic a,b,c

x toxic a,b,c

x      toxic a,b,c

y

x toxic a,b

x toxic a,b,c

x toxic a,b,c

x toxic a,b,c



x toxic b,c

x toxic a,b,c

x toxic a,b,c

**Table S2. Wells Eliminated for Toxicity on Image Review**

|              |             |                                      |          |
|--------------|-------------|--------------------------------------|----------|
| 50001.00 A13 | M-003255-02 | CHK1 checkpoint homolog (S. pom      | 1111.00  |
| 50001.00 B11 | M-019847-01 | coatamer protein complex, subuni     | 9276.00  |
| 50001.00 C13 | M-006708-00 | creatine kinase, mitochondrial 1B    | 1159.00  |
| 50001.00 I21 | M-011426-01 | A kinase (PKA) anchor protein 1      | 8165.00  |
| 50001.00 K19 | M-003000-01 | v-akt murine thymoma viral oncog     | 207.00   |
| 50002.00 B18 | M-008476-01 | protein tyrosine phosphatase, rece   | 5795.00  |
| 50002.00 M09 | M-004813-01 | male germ cell-associated kinase     | 4117.00  |
| 50002.00 P02 | M-004647-00 | protein kinase N3                    | 29941.00 |
| 50005.00 M15 | M-020188-00 | olfactory receptor, family 2, subfa  | 26211.00 |
| 50006.00 F09 | M-003773-01 | ELAV (embryonic lethal, abnormal     | 1994.00  |
| 50006.00 H06 | M-004565-03 | integrin, alpha V (vitronectin recep | 3685.00  |
| 50006.00 H14 | M-006983-01 | inhibitor of growth family, membe    | 51147.00 |
| 50006.00 P19 | M-009020-00 | hairy and enhancer of split 7 (Dros  | 84667.00 |
| 50009.00 O23 | M-012176-00 | mesenchyme homeobox 2                | 4223.00  |
| 50009.00 P17 | M-016508-00 | SP140 nuclear body protein           | 11262.00 |
| 50010.00 F07 | M-008651-00 | amidohydrolase domain containin      | 51005.00 |
| 50010.00 I14 | M-009599-01 | S-adenosylhomocysteine hydrolas      | 191.00   |
| 50010.00 L04 | M-009805-01 | ectonucleotide pyrophosphatase/p     | 59084.00 |
| 50010.00 P02 | M-008125-01 | dimethylglycine dehydrogenase        | 29958.00 |
| 50011.00 A07 | M-008900-00 | glycine amidinotransferase (L-argir  | 2628.00  |
| 50011.00 E05 | M-008226-00 | glucosamine (N-acetyl)-6-sulfatase   | 2799.00  |
| 50011.00 G21 | M-011964-00 | H2A histone family, member Y         | 9555.00  |
| 50011.00 I17 | M-009823-01 | homogentisate 1,2-dioxygenase (h     | 3081.00  |
| 50012.00 K02 | M-004402-01 | caspase 10, apoptosis-related cyst   | 843.00   |
| 50013.00 I07 | M-019661-00 | lactotransferrin                     | 4057.00  |
| 50014.00 A02 | M-020011-00 | lipoprotein, Lp(a)                   | 4018.00  |
| 50014.00 A07 | M-009752-01 | pyruvate dehydrogenase complex,      | 8050.00  |
| 50014.00 A23 | M-009553-00 | RAB36, member RAS oncogene far       | 9609.00  |
| 50014.00 B02 | M-011126-00 | CD79b molecule, immunoglobulin-      | 974.00   |
| 50014.00 E10 | M-004900-01 | glucose phosphate isomerase          | 2821.00  |
| 50014.00 E18 | M-009494-00 | FK506 binding protein 1A, 12kDa      | 2280.00  |
| 50014.00 E20 | M-009907-01 | fatty acid amide hydrolase           | 2166.00  |
| 50014.00 F07 | M-010020-00 | cystatin A (stefin A)                | 1475.00  |
| 50014.00 G10 | M-007880-01 | chemokine (C-X-C motif) ligand 6 (   | 6372.00  |
| 50014.00 G14 | M-003772-06 | CASP8 and FADD-like apoptosis re     | 8837.00  |
| 50014.00 G19 | M-008324-00 | dual oxidase 2                       | 50506.00 |
| 50014.00 H19 | M-011298-01 | immunoglobulin (CD79A) binding p     | 3476.00  |
| 50014.00 P02 | M-010216-01 | serine peptidase inhibitor, Kunitz t | 10653.00 |
| 50014.00 P05 | M-008387-00 | ral guanine nucleotide dissociation  | 23179.00 |
| 50014.00 P11 | M-021066-00 | serpin peptidase inhibitor, clade A  | 51156.00 |
| 50014.00 P13 | M-015832-00 | serpin peptidase inhibitor, clade A  | 5104.00  |
| 50014.00 P23 | M-019684-00 | serpin peptidase inhibitor, clade B  | 5268.00  |
| 50015.00 B13 | M-003530-03 | RAD51 homolog (RecA homolog, E       | 5888.00  |
| 50015.00 F21 | M-017305-00 | TRIAD3 protein                       | 54476.00 |
| 50015.00 G05 | M-006077-00 | ubiquitin specific peptidase 29      | 57663.00 |



|              |             |                                                        |           |
|--------------|-------------|--------------------------------------------------------|-----------|
| 50015.00 K06 | M-013642-00 | anaphase promoting complex subunit 1                   | 29945.00  |
| 50015.00 N14 | M-009469-01 | kinesin family member 3C                               | 3797.00   |
| 50015.00 O19 | M-003281-04 | menage a trois homolog 1, cyclin H                     | 4331.00   |
| 50015.00 O20 | M-006545-00 | peroxisome biogenesis factor 10                        | 5192.00   |
| 50015.00 P06 | M-004959-01 | kinesin heavy chain member 2A                          | 3796.00   |
| 50015.00 P12 | M-008252-01 | kinesin family member 12                               | 113220.00 |
| 50015.00 P14 | M-003317-01 | kinesin family member 11                               | 3832.00   |
| 50016.00 A06 | M-012316-00 | KDEL (Lys-Asp-Glu-Leu) endoplasmic reticulum chaperone | 11015.00  |
| 50016.00 H17 | M-017920-00 | neutral sphingomyelinase (N-SMase)                     | 8439.00   |
| 50016.00 I04 | M-006190-00 | glutamate receptor, ionotropic, kainate type 1         | 2898.00   |
| 50016.00 N15 | M-013710-00 | secretogranin III                                      | 29106.00  |
| 50016.00 O12 | M-017088-00 | CD300c molecule                                        | 10871.00  |
| 50017.00 A05 | M-004381-01 | B-cell CLL/lymphoma 10                                 | 8915.00   |
| 50017.00 A23 | M-011593-01 | bone morphogenetic protein 8b (osteogenic protein-1)   | 656.00    |
| 50017.00 I05 | M-010206-01 | CD36 molecule (thrombospondin receptor)                | 948.00    |
| 50017.00 K12 | M-011288-00 | gonadotropin-releasing hormone 2                       | 2797.00   |
| 50017.00 K20 | M-020860-00 | ghrelin/obestatin preprohormone                        | 51738.00  |
| 50017.00 N21 | M-013593-00 | killer cell lectin-like receptor subfamily 1 member 1  | 8302.00   |
| 50017.00 N23 | M-011304-00 | killer cell lectin-like receptor subfamily 1 member 2  | 3824.00   |
| 50017.00 O04 | M-013088-00 | growth differentiation factor 1                        | 2657.00   |
| 50017.00 P04 | M-020015-00 | CD180 molecule                                         | 4064.00   |
| 50017.00 P11 | M-011718-00 | lectin, galactoside-binding, soluble 1                 | 3956.00   |
| 50017.00 P19 | M-012491-00 | C-type lectin domain family 2, member 1                | 29121.00  |
| 50018.00 B10 | M-010551-00 | coiled-coil domain containing 6                        | 8030.00   |
| 50018.00 D10 | M-011622-00 | collagen, type IX, alpha 1                             | 1297.00   |
| 50018.00 K18 | M-003401-02 | estrogen receptor 1                                    | 2099.00   |
| 50018.00 P13 | M-008096-00 | tumor necrosis factor receptor superfamily member 1B   | 8764.00   |
| 50018.00 P19 | M-005197-00 | tumor necrosis factor receptor superfamily member 1A   | 7132.00   |
| 50018.00 P21 | M-003934-00 | tumor necrosis factor receptor superfamily member 1C   | 7133.00   |
| 50018.00 P23 | M-004449-01 | tumor necrosis factor receptor superfamily member 1D   | 8718.00   |
| 50019.00 I14 | M-019674-00 | nidogen 1                                              | 4811.00   |
| 50019.00 I16 | M-019900-00 | NHP2 non-histone chromosome protein                    | 4809.00   |
| 50019.00 N04 | M-007381-01 | solute carrier family 11 (proton-coupled) member 1     | 4891.00   |
| 50019.00 O04 | M-011034-00 | fibrillin 1                                            | 2200.00   |
| 50019.00 O10 | M-011270-00 | FAT tumor suppressor homolog 2 (FAT2)                  | 2196.00   |
| 50021.00 G14 | M-007879-01 | chemokine (C-X-C motif) ligand 5                       | 6374.00   |
| 50021.00 M19 | M-020163-00 | ceroid-lipofuscinosis, neuronal 5                      | 1203.00   |
| 50021.00 O09 | M-019513-00 | clusterin                                              | 1191.00   |
| 50021.00 P17 | M-016196-00 | CD164 molecule, sialomucin                             | 8763.00   |
| 50022.00 G12 | M-011048-00 | hemoglobin, delta                                      | 3045.00   |
| 50022.00 K10 | M-028674-00 | general transcription factor IIH, polypeptide 1        | 2968.00   |
| 50022.00 O07 | M-012041-00 | growth factor, augmenter of liver injury               | 2671.00   |
| 50023.00 G14 | M-009000-00 | oligodendrocyte transcription factor 1                 | 167826.00 |
| 50023.00 I20 | M-018325-00 | nuclear distribution gene C homolog 1                  | 10726.00  |
| 50023.00 I21 | M-004899-00 | phosphatidic acid phosphatase type 1B                  | 84513.00  |
| 50023.00 N05 | M-026943-00 | POU domain, class 6, transcription factor 1            | 5463.00   |
| 50024.00 G17 | M-011157-00 | ribosomal protein S29                                  | 6235.00   |

|              |             |                                                          |          |
|--------------|-------------|----------------------------------------------------------|----------|
| 50024.00 I10 | M-012599-00 | slit homolog 1 (Drosophila)                              | 6585.00  |
| 50024.00 N10 | M-009552-02 | X-box binding protein 1                                  | 7494.00  |
| 50024.00 P09 | M-021117-00 | RB1-inducible coiled-coil 1                              | 9821.00  |
| 50047.00 A13 | M-008795-00 | ATP-binding cassette, sub-family A                       | 21.00    |
| 50047.00 E17 | M-012492-00 | adaptor-related protein complex 2                        | 160.00   |
| 50047.00 H15 | M-011835-00 | coatamer protein complex, subuni                         | 1314.00  |
| 50047.00 I20 | M-007817-00 | complement component 4 binding                           | 722.00   |
| 50047.00 J06 | M-012999-00 | defensin, alpha 1                                        | 1667.00  |
| 50047.00 K06 | M-011597-00 | betacellulin                                             | 685.00   |
| 50048.00 L11 | M-005906-00 | kallikrein 1                                             | 3816.00  |
| 50048.00 L14 | M-011325-00 | melanoma antigen family B, 1                             | 4112.00  |
| 50048.00 O10 | M-011676-00 | glutathione peroxidase 4 (phosphc                        | 2879.00  |
| 50048.00 P02 | M-010030-00 | lymphocyte antigen 9                                     | 4063.00  |
| 50048.00 P05 | M-017237-00 | laminin, alpha 5                                         | 3911.00  |
| 50048.00 P07 | M-013481-00 | lysosomal-associated membrane p                          | 3916.00  |
| 50049.00 A20 | M-028956-00 | postmeiotic segregation increased                        | 5379.00  |
| 50049.00 C19 | M-019919-00 | myosin IE                                                | 4643.00  |
| 50049.00 J07 | M-007748-00 | acyl-CoA synthetase long-chain far                       | 23305.00 |
| 50049.00 L04 | M-006809-00 | ADP-dependent glucokinase                                | 83440.00 |
| 50049.00 L15 | M-009002-00 | acyl-Coenzyme A dehydrogenase f                          | 28976.00 |
| 50049.00 L18 | M-027136-00 | asparagine-linked glycosylation 8 t                      | 79053.00 |
| 50049.00 N08 | M-010799-00 | acyl-Coenzyme A binding domain c                         | 64746.00 |
| 50049.00 O18 | M-009401-00 | N-ethylmaleimide-sensitive factor                        | 4905.00  |
| 50049.00 O23 | M-012726-00 | metallothionein 1F                                       | 4494.00  |
| 50049.00 P09 | M-021468-00 | absent in melanoma 1-like                                | 55057.00 |
| 50049.00 P17 | M-020523-00 | allantoicase                                             | 55821.00 |
| 50050.00 A20 | M-008270-00 | syndecan binding protein (syntenin)                      |          |
| 50050.00 C16 | M-021405-00 | SET binding factor 1                                     |          |
| 50050.00 D10 | M-011789-00 | threonyl-tRNA synthetase                                 |          |
| 50050.00 D11 | M-007427-00 | solute carrier family 1 (glial high affinity glutamate t |          |
| 50050.00 D16 | M-010623-00 | synaptophysin-like 1                                     |          |
| 50050.00 E13 | M-009261-00 | proteasome (prosome, macropain) 26S subunit, ATF         |          |
| 50050.00 E15 | M-009484-00 | proteasome (prosome, macropain) 26S subunit, ATF         |          |
| 50050.00 E16 | M-011891-00 | ribosome binding protein 1 homolog 180kDa (dog)          |          |
| 50050.00 E19 | M-011363-00 | proteasome (prosome, macropain) 26S subunit, nor         |          |
| 50050.00 E20 | M-013722-00 | ribosomal protein S27a                                   |          |
| 50050.00 E21 | M-011364-00 | proteasome (prosome, macropain) 26S subunit, nor         |          |
| 50050.00 F12 | M-012324-00 | surfeit 5                                                | SURF5    |
| 50050.00 F20 | M-009862-00 | sulfotransferase family, cytosolic, :SULT1C2             |          |
| 50050.00 F21 | M-007600-00 | solute carrier family 6 (neurotrans SLC6A13              |          |
| 50050.00 F23 | M-007610-00 | solute carrier family 7 (cationic am SLC7A1              |          |
| 50050.00 G21 | M-019703-00 | parvalbumin                                              | PVALB    |
| 50050.00 J21 | M-007422-00 | solute carrier family 19 (folate trans SLC19A1           |          |
| 50050.00 J23 | M-007432-00 | solute carrier family 20 (phosphate SLC20A1              |          |
| 50050.00 P04 | M-017377-00 | SRY (sex determining region Y)-box SOX11                 |          |
| 50050.00 P14 | M-017520-00 | sorting nexin 2                                          | SNX2     |
| 50051.00 A19 | M-010625-00 | tetraspanin 4                                            | 7106.00  |

|              |             |                                       |          |
|--------------|-------------|---------------------------------------|----------|
| 50051.00 C05 | M-019747-00 | tropomodulin 1                        | 7111.00  |
| 50051.00 D04 | M-011530-00 | N-ethylmaleimide-sensitive factor     | 8775.00  |
| 50051.00 E15 | M-028592-00 | TSPY-like 1                           | 7259.00  |
| 50051.00 G07 | M-021218-00 | tuftelin 1                            | 7286.00  |
| 50051.00 M15 | M-012773-00 | zinc finger protein 16                | 7564.00  |
| 50052.00 E07 | M-004286-00 | procollagen-lysine, 2-oxoglutarate    | 8985.00  |
| 50052.00 I08 | M-005076-00 | palmitoyl-protein thioesterase 2      | 9374.00  |
| 50052.00 J07 | M-020790-00 | zinc finger protein 592               | 9640.00  |
| 50052.00 K11 | M-005126-01 | solute carrier family 16, member 3    | 9123.00  |
| 50052.00 K12 | M-019851-00 | elongation factor Tu GTP binding d    | 9343.00  |
| 50052.00 L12 | M-017968-00 | dedicator of cytokinesis 4            | 9732.00  |
| 50052.00 L16 | M-021119-00 | Vpr (HIV-1) binding protein           | 9730.00  |
| 50052.00 M14 | M-015820-00 | zinc finger and BTB domain contain    | 9278.00  |
| 50052.00 N20 | M-020925-00 | USP6 N-terminal like                  | 9712.00  |
| 50053.00 A13 | M-021122-00 | Rho GTPase activating protein 11A     | 9824.00  |
| 50053.00 A18 | M-020003-00 | CTD (carboxy-terminal domain, RN      | 10217.00 |
| 50053.00 A19 | M-009885-00 | DnaJ (Hsp40) homolog, subfamily (     | 9829.00  |
| 50053.00 A23 | M-012968-00 | KIAA0125                              | 9834.00  |
| 50053.00 C08 | M-012112-00 | InaD-like (Drosophila)                | 10207.00 |
| 50053.00 C13 | M-023203-00 | pleckstrin homology domain conta      | 9842.00  |
| 50053.00 C23 | M-018914-00 | EPM2A (laforin) interacting proteir   | 9852.00  |
| 50053.00 D04 | M-020157-00 | slowmo homolog 1 (Drosophila)         | 10650.00 |
| 50053.00 D12 | M-017969-00 | ATP synthase, H+ transporting, mit    | 10632.00 |
| 50053.00 E15 | M-021249-00 | proteasome (prosome, macropain        | 9861.00  |
| 50053.00 F08 | M-008511-00 | trans-golgi network protein 2         | 10618.00 |
| 50053.00 F11 | M-020094-00 | small nuclear RNA activating comp     | 10302.00 |
| 50053.00 G14 | M-032208-00 | splicing factor, arginine/serine-rich | 10147.00 |
| 50053.00 G19 | M-021230-00 | TBC1 domain family, member 4          | 9882.00  |
| 50053.00 O13 | M-003531-00 | RNA binding motif protein 8A          | 9939.00  |
| 50053.00 P05 | M-012732-00 | translocase of outer mitochondrial    | 10452.00 |
| 50053.00 P06 | M-013680-00 | nuclear RNA export factor 1           | 10482.00 |
| 50053.00 P08 | M-016219-00 | PCI domain containing 1 (herpesvii    | 10480.00 |
| 50053.00 P12 | M-007476-00 | solute carrier family 25 (mitochondr  | 10478.00 |
| 50053.00 P17 | M-012992-00 | sperm associated antigen 11B          | 10407.00 |
| 50053.00 P20 | M-019123-00 | component of oligomeric golgi con     | 10466.00 |
| 50054.00 A18 | M-006043-00 | protease, serine, 23                  | 11098.00 |
| 50054.00 A19 | M-020158-00 | adaptor-related protein complex 4     | 10717.00 |
| 50054.00 C15 | M-012279-00 | cell adhesion molecule with homo      | 10752.00 |
| 50054.00 G12 | M-008872-00 | leukocyte immunoglobulin-like rec     | 11025.00 |
| 50054.00 J07 | M-008449-00 | proline synthetase co-transcribed l   | 11212.00 |
| 50054.00 J17 | M-019671-00 | PRA1 domain family, member 2          | 11230.00 |
| 50054.00 L20 | M-020488-00 | KIAA1009                              | 22832.00 |
| 50054.00 N16 | M-020293-00 | coatamer protein complex, subuni      | 22818.00 |
| 50054.00 P04 | M-019487-00 | component of oligomeric golgi con     | 22796.00 |
| 50054.00 P15 | M-012393-00 | DEAD (Asp-Glu-Ala-Asp) box polyp      | 11325.00 |
| 50055.00 D16 | M-012845-00 | protein O-fucosyltransferase 1        | 23509.00 |
| 50055.00 L07 | M-014049-00 | Dmx-like 2                            | 23312.00 |

|              |             |                                      |          |
|--------------|-------------|--------------------------------------|----------|
| 50055.00 L08 | M-013104-00 | coactosin-like 1 (Dictyostelium)     | 23406.00 |
| 50055.00 M10 | M-031841-00 | zinc finger, ZZ-type with EF-hand d  | 23140.00 |
| 50055.00 N11 | M-014051-00 | tetratricopeptide repeat domain 2    | 23331.00 |
| 50057.00 I09 | M-020546-00 | sialic acid binding Ig-like lectin 7 | 27036.00 |
| 50057.00 M09 | M-017649-00 | trafficking protein particle comple  | 27095.00 |
| 50057.00 M20 | M-017650-00 | PRELI domain containing 1            | 27166.00 |
| 50057.00 O15 | M-015461-00 | structural maintenance of chromo     | 27127.00 |
| 50058.00 A18 | M-006984-00 | zinc finger protein 639              | 51193.00 |
| 50058.00 A20 | M-021092-00 | synovial sarcoma translocation ger   | 51188.00 |
| 50058.00 K20 | M-020994-00 | intraflagellar transport 52 homolo   | 51098.00 |
| N15          | M-010207-00 | archaemetzincins-2                   | 51321.00 |
| 50059.00 O23 | M-007940-00 | interleukin 17D                      | 53342.00 |
| 50059.00 P07 | M-020288-00 | ATP binding domain 1 family, mem     | 54707.00 |
| 50059.00 P17 | M-015498-00 | chromosome 21 open reading fran      | 54073.00 |
| 50060.00 A19 | M-004584-00 | BCL6 co-repressor                    | 54880.00 |
| 50060.00 A21 | M-020741-00 | testis expressed 10                  | 54881.00 |
| 50060.00 O07 | M-015366-00 | transmembrane protein 70             | 54968.00 |
| 50060.00 O12 | M-031212-00 | hypothetical protein FLJ20581        | 54988.00 |
| 50060.00 P05 | M-010039-00 | nudix (nucleoside diphosphate link   | 55190.00 |
| 50060.00 P07 | M-007723-00 | NAD synthetase 1                     | 55191.00 |
| 50061.00 A06 | M-016863-00 | importin 9                           | 55705.00 |
| 50061.00 A11 | M-021333-00 | La ribonucleoprotein domain famil    | 55323.00 |
| 50061.00 A12 | M-030269-00 | hypothetical protein FLJ10357        | 55701.00 |
| 50061.00 A13 | M-021213-00 | chromosome 4 open reading fram       | 55325.00 |
| 50061.00 A17 | M-008473-00 | lin-7 homolog C (C. elegans)         | 55327.00 |
| 50061.00 F08 | M-013286-00 | protocadherin gamma subfamily C      | 56098.00 |
| 50061.00 K07 | M-007549-00 | solute carrier family 35, member E   | 55508.00 |
| 50061.00 K08 | M-020681-00 | sphingomyelin phosphodiesterase      | 55627.00 |
| 50061.00 K12 | M-021091-00 | zinc finger, DHHC-type containing    | 55625.00 |
| 50061.00 K13 | M-008358-00 | elaC homolog 1 (E. coli)             | 55520.00 |
| 50061.00 K15 | M-007012-00 | tripartite motif-containing 36       | 55521.00 |
| 50061.00 K16 | M-021071-00 | THUMP domain containing 1            | 55623.00 |
| 50061.00 K18 | M-015527-00 | tetratricopeptide repeat domain 2    | 55622.00 |
| 50061.00 K20 | M-009655-00 | TRM1 tRNA methyltransferase 1 h      | 55621.00 |
| 50061.00 L05 | M-017202-00 | DEAD (Asp-Glu-Ala-Asp) box polyp     | 55794.00 |
| 50061.00 L09 | M-015373-00 | muscleblind-like 3 (Drosophila)      | 55796.00 |
| 50061.00 L11 | M-008721-00 | methyltransferase like 2B            | 55798.00 |
| 50061.00 L13 | M-021246-00 | calcium channel, voltage-depende     | 55799.00 |
| 50061.00 L16 | M-020987-00 | zinc finger protein 302              | 55900.00 |
| 50062.00 A09 | M-010167-00 | testis expressed 13A                 | 56157.00 |
| 50062.00 A10 | M-013200-00 | T-box 20                             | 57057.00 |
| 50062.00 A11 | M-013487-00 | testis expressed 12                  | 56158.00 |
| 50062.00 A14 | M-031983-00 | phospholipid scramblase 2            | 57047.00 |
| 50062.00 E06 | M-015289-00 | bobby sox homolog (Drosophila)       | 56987.00 |
| 50062.00 F23 | M-013847-00 | KIAA1219                             | 57148.00 |
| 50062.00 K05 | M-006256-00 | potassium channel, subfamily K, m    | 56660.00 |
| 50062.00 K09 | M-015057-00 | mucin 13, cell surface associated    | 56667.00 |

|              |             |                                      |           |
|--------------|-------------|--------------------------------------|-----------|
| 50062.00 K12 | M-020414-00 | chromosome 11 open reading fran      | 56935.00  |
| 50062.00 K13 | M-020701-00 | chromosome 11 open reading fran      | 56673.00  |
| 50062.00 K14 | M-008550-00 | carbonic anhydrase X                 | 56934.00  |
| 50062.00 K15 | M-020706-00 | TMEM9 domain family, member B        | 56674.00  |
| 50062.00 K19 | M-008980-00 | achaete-scute complex homolog 3      | 56676.00  |
| 50062.00 K20 | M-006041-00 | signal peptide peptidase-like 2B     | 56928.00  |
| 50062.00 L02 | M-019101-00 | CCR4-NOT transcription complex, s    | 57472.00  |
| 50062.00 L05 | M-024244-00 | chromosome 20 open reading fran      | 57186.00  |
| 50062.00 L12 | M-015488-00 | hedgehog acyltransferase-like        | 57467.00  |
| 50062.00 L16 | M-022880-00 | TBC1 domain family, member 24        | 57465.00  |
| 50063.00 H02 | M-006013-00 | protease, serine, 22                 | 64063.00  |
| 50063.00 K04 | M-019159-00 | sema domain, immunoglobulin do       | 57715.00  |
| 50063.00 K05 | M-014129-00 | zinc finger and BTB domain contain   | 57621.00  |
| 50063.00 K11 | M-023134-00 | KIAA1486 protein                     | 57624.00  |
| 50063.00 K14 | M-007340-00 | solute carrier family 7 (cationic am | 57709.00  |
| 50063.00 K18 | M-023101-00 | KIAA1604 protein                     | 57703.00  |
| 50063.00 L04 | M-013050-00 | mitochondrial ribosomal protein S    | 63931.00  |
| 50063.00 L05 | M-013978-00 | tRNA methyltransferase 11 homolo     | 60487.00  |
| 50063.00 L06 | M-013917-00 | chromosome 20 open reading fran      | 63930.00  |
| 50063.00 L08 | M-013916-00 | hepatocellular carcinoma antigen g   | 63928.00  |
| 50063.00 L09 | M-015916-00 | phosphopantothenoylcysteine dec      | 60490.00  |
| 50063.00 L11 | M-013979-00 | NIF3 NGG1 interacting factor 3-like  | 60491.00  |
| 50063.00 L12 | M-016168-00 | cell death-inducing DFFA-like effec  | 63924.00  |
| 50064.00 K04 | M-016323-00 | family with sequence similarity 11:  | 64773.00  |
| 50064.00 L04 | M-014297-00 | FAST kinase domains 3                | 79072.00  |
| 50064.00 L05 | M-014256-00 | chromosome 20 open reading fran      | 65992.00  |
| 50064.00 L06 | M-008861-00 | ELOVL family member 6, elongatio     | 79071.00  |
| 50064.00 L07 | M-012884-00 | mitochondrial ribosomal protein S    | 65993.00  |
| 50064.00 L09 | M-014258-00 | hypothetical protein MGC2752         | 65996.00  |
| 50064.00 L11 | M-014261-00 | leucine rich repeat containing 61    | 65999.00  |
| 50064.00 L12 | M-016359-00 | methyltransferase 10 domain cont     | 79066.00  |
| 50064.00 L13 | M-023601-00 | transmembrane protein 108            | 66000.00  |
| 50064.00 L14 | M-014294-00 | ATG9 autophagy related 9 homolo      | 79065.00  |
| 50065.00 K06 | M-016135-00 | chromosome 14 open reading fran      | 79686.00  |
| 50065.00 L02 | M-014486-00 | SET domain containing 6              | 79918.00  |
| 50065.00 L04 | M-014485-00 | MAGI family member, X-linked         | 79917.00  |
| 50065.00 L05 | M-005339-00 | NKF3 kinase family member            | 79834.00  |
| 50065.00 L06 | M-004738-00 | ATPase family, AAA domain contai     | 79915.00  |
| 50065.00 L07 | M-007067-00 | LON peptidase N-terminal domain      | 79836.00  |
| 50065.00 L08 | M-008132-00 | hypothetical protein FLJ22028        | 79912.00  |
| 50065.00 L10 | M-014483-00 | butyrophilin-like 8                  | 79908.00  |
| 50065.00 L16 | M-014479-00 | hypothetical protein FLJ14154        | 79903.00  |
| 50065.00 L21 | M-014447-00 | zinc finger, DHHC-type containing :  | 79844.00  |
| 50067.00 H16 | M-018613-00 | chromosome 12 open reading fran      | 84298.00  |
| 50067.00 M15 | M-017950-00 | yippee-like 3 (Drosophila)           | 83719.00  |
| 50072.00 H11 | M-016793-00 | chromosome 6 open reading fram       | 135398.00 |
| 50074.00 I10 | M-021465-00 | nuclear transcription factor, X-box  | 152518.00 |

|          |     |             |                                                |           |
|----------|-----|-------------|------------------------------------------------|-----------|
| 50074.00 | I16 | M-015543-00 | chromosome 3 open reading fram                 | 152405.00 |
| 50075.00 | E13 | M-031845-00 | zinc finger protein 600                        | 162966.00 |
| 50076.00 | A14 | M-007567-00 | solute carrier family 39 (zinc transp          | 221074.00 |
| 50076.00 | A17 | M-018489-00 | zinc finger protein 584                        | 201514.00 |
| 50076.00 | A18 | M-016615-00 | chromosome 10 open reading fran                | 221060.00 |
| 50076.00 | A19 | M-016504-00 | zinc finger and SCAN domain conta              | 201516.00 |
| 50076.00 | A21 | M-017859-00 | STT3, subunit of the oligosaccharyl            | 201595.00 |
| 50076.00 | A23 | M-017812-00 | dynein heavy chain domain 2                    | 201625.00 |
| 50076.00 | M09 | M-023566-00 | EPH receptor A6                                | 203806.00 |
| 50077.00 | A14 | M-031764-00 | ATP synthase, H <sup>+</sup> transporting, mit | 267020.00 |
| 50077.00 | G07 | M-018370-00 | MPV17 mitochondrial membrane p                 | 255027.00 |
| 50077.00 | K20 | M-015725-00 | placenta-specific 2                            | 257000.00 |
| 50077.00 | L20 | M-018954-00 | chromosome 14 open reading fran                | 283598.00 |
| 50077.00 | O23 | M-018350-00 | chromosome 11 open reading fran                | 256329.00 |
| 50078.00 | A11 | M-031748-00 | KIAA1267                                       | 284058.00 |
| 50078.00 | A21 | M-018227-00 | hypothetical protein FLJ40504                  | 284085.00 |
| 50078.00 | B23 | M-018007-00 | immunoglobulin superfamily, mem                | 285313.00 |
| 50078.00 | I06 | M-032042-00 | similar to FRG1 protein (FSHD regi             | 284802.00 |
| 50078.00 | I10 | M-018843-00 | chromosome 20 open reading fran                | 284800.00 |
| 50078.00 | I11 | M-018209-00 | transmembrane protein 145                      | 284339.00 |
| 50078.00 | I13 | M-027232-00 | DMC                                            | 284340.00 |
| 50078.00 | I14 | M-031339-00 | hypothetical protein LOC284788                 | 284788.00 |
| 50078.00 | K21 | M-018207-00 | hypothetical protein FLJ40235                  | 284369.00 |
| 50079.00 | A09 | M-007172-00 | tripartite motif-containing 59                 | 286827.00 |
| 50079.00 | A16 | M-007174-00 | tripartite motif family-like 1                 | 339976.00 |
| 50079.00 | A21 | M-021490-00 | dehydrogenase/reductase (SDR fa                | 317749.00 |
| 50079.00 | C10 | M-017640-00 | chromosome 3 open reading fram                 | 339883.00 |
| 50079.00 | C14 | M-017970-00 | kyphoscoliosis peptidase                       | 339855.00 |
| 50079.00 | C21 | M-022600-00 | snail homolog 3 (Drosophila)                   | 333929.00 |
| 50079.00 | I17 | M-009140-00 | potassium channel, subfamily K, m              | 338567.00 |
| 50079.00 | J11 | M-021693-00 | FRAS1 related extracellular matrix             | 341640.00 |
| 50079.00 | K19 | M-030043-00 | hypothetical protein LOC338758                 | 338758.00 |
| 50079.00 | L21 | M-008085-00 | syncollin                                      | 342898.00 |
| 50080.00 | A09 | M-019023-00 | late cornified envelope 2A                     | 353139.00 |
| 50080.00 | A18 | M-031733-00 | potassium channel tetramerisatio               | 386618.00 |
| 50080.00 | A21 | M-009142-00 | ligand-gated ion channel, zinc activ           | 353174.00 |
| 50080.00 | A23 | M-007374-00 | solute carrier organic anion transp            | 353189.00 |
| 50080.00 | C11 | M-031742-00 | chromosome 4 open reading fram                 | 353289.00 |
| 50080.00 | G15 | M-019355-00 | histone linker H1 domain, spermat              | 373861.00 |
| 50080.00 | H04 | M-032108-00 | FLJ44874 protein                               | 399990.00 |
| 50080.00 | I13 | M-032107-00 | similar to RIKEN cDNA 1810059G2                | 374395.00 |
| 50080.00 | I18 | M-031840-00 | chromosome 5 open reading fram                 | 375484.00 |
| 50080.00 | M06 | M-031853-00 | family with sequence similarity 39,            | 375260.00 |
| 50080.00 | M19 | M-027331-00 | chromosome 19 open reading fran                | 374877.00 |
| 50080.00 | O23 | M-027341-00 | chromosome 1 open reading fram                 | 374946.00 |



| ew        | % inf | abs dev | robust Z | % inf | abs dev | robust Z | % inf |
|-----------|-------|---------|----------|-------|---------|----------|-------|
| CHEK1     | 22.31 | 15.04   | 3.91     | 19.60 | 11.43   | 2.54     | 66.93 |
| COPB2     | 29.52 | 22.25   | 5.78     | 20.61 | 12.44   | 2.77     | 31.51 |
| CKMT1B    | 19.69 | 12.42   | 3.23     | 5.95  | 2.22    | -0.49    | 24.97 |
| AKAP1     | 15.37 | 8.10    | 2.11     | 5.36  | 2.81    | -0.62    | 23.69 |
| AKT1      | 15.20 | 7.93    | 2.06     | 18.40 | 10.23   | 2.28     | 11.20 |
| PTPRJ     | 19.11 | 9.69    | 2.10     | 27.22 | 18.12   | 4.25     | 4.72  |
| MAK       | 22.61 | 13.19   | 2.87     | 14.32 | 5.22    | 1.22     | 20.63 |
| PKN3      | 32.26 | 22.84   | 4.96     | 37.50 | 28.40   | 6.66     | 5.68  |
| OR2F1     | 14.22 | 7.00    | 1.73     | 18.35 | 10.15   | 2.16     | 40.56 |
| ELAVL1    | 16.77 | 10.21   | 2.16     | 8.07  | 4.85    | 2.01     | 5.52  |
| ITGAV     | 21.43 | 14.87   | 3.14     | 6.19  | 2.97    | 1.23     | 13.92 |
| ING4      | 16.92 | 10.36   | 2.19     | 8.61  | 5.39    | 2.23     | 7.01  |
| HES7      | 8.49  | 1.93    | 0.41     | 11.30 | 8.08    | 3.34     | 16.62 |
| MEOX2     | 15.35 | 10.59   | 3.39     | 15.83 | 11.28   | 3.61     | 2.00  |
| SP140     | 11.93 | 7.17    | 2.30     | 11.24 | 6.69    | 2.15     | 11.15 |
| AMDHD2    | 7.59  | 4.78    | 2.37     | 7.22  | 5.05    | 2.94     | 3.99  |
| AHCY      | 5.59  | 2.78    | 1.38     | 9.70  | 7.53    | 4.39     | 10.87 |
| ENPP5     | 8.44  | 5.63    | 2.79     | 5.53  | 3.36    | 1.96     | 9.81  |
| DMGDH     | 31.37 | 28.56   | 14.18    | 12.90 | 10.73   | 6.26     | 1.35  |
| GATM      | 7.86  | 5.23    | 2.30     | 8.93  | 6.30    | 3.06     | 8.07  |
| GNS       | 8.95  | 6.32    | 2.78     | 5.22  | 2.59    | 1.26     | 8.84  |
| H2AFY     | 8.91  | 6.28    | 2.76     | 8.59  | 5.96    | 2.90     | 3.05  |
| HGD       | 9.63  | 7.00    | 3.08     | 5.95  | 3.32    | 1.61     | 9.21  |
| CASP10    | 9.27  | 4.43    | 1.13     | 9.09  | 5.65    | 2.15     | 17.15 |
| LTF       | 10.36 | 6.61    | 2.21     | 6.91  | 4.42    | 2.18     | 6.67  |
| LPA       | 3.51  | 1.13    | -0.37    | 20.69 | 17.46   | 6.80     | 10.56 |
| PDHX      | 10.08 | 5.44    | 1.80     | 8.37  | 5.14    | 2.00     | 13.43 |
| RAB36     | 8.01  | 3.37    | 1.12     | 12.94 | 9.71    | 3.78     | 21.33 |
| CD79B     | 16.45 | 11.81   | 3.90     | 11.74 | 8.51    | 3.32     | 13.33 |
| GPI       | 14.19 | 9.55    | 3.16     | 12.37 | 9.14    | 3.56     | 16.76 |
| FKBP1A    | 14.95 | 10.31   | 3.41     | 9.32  | 6.09    | 2.37     | 13.97 |
| FAAH      | 12.31 | 7.67    | 2.53     | 9.75  | 6.52    | 2.54     | 11.58 |
| CSTA      | 60.97 | 56.33   | 18.63    | 19.29 | 16.06   | 6.26     | 50.36 |
| CXCL6     | 14.58 | 9.94    | 3.29     | 7.23  | 4.00    | 1.56     | 10.72 |
| CFLAR     | 11.17 | 6.53    | 2.16     | 4.38  | 1.15    | 0.45     | 13.99 |
| DUOX2     | 32.01 | 27.37   | 9.05     | 3.89  | 0.66    | 0.26     | 12.57 |
| IGBP1     | 17.95 | 13.31   | 4.40     | 8.64  | 5.41    | 2.11     | 6.91  |
| SPINT2    | 18.32 | 13.68   | 4.52     | 12.83 | 9.60    | 3.74     | 12.83 |
| RGL1      | 5.18  | 0.54    | 0.18     | 17.35 | 14.12   | 5.50     | 15.56 |
| SERPINA10 | 10.45 | 5.81    | 1.92     | 28.68 | 25.45   | 9.91     | 17.57 |
| SERPINA5  | 3.11  | 1.53    | -0.51    | 43.62 | 40.39   | 15.74    | 13.92 |
| SERPINB5  | 2.56  | 2.08    | -0.69    | 25.81 | 22.58   | 8.80     | 12.63 |
| RAD51     | 12.70 | 7.75    | 2.58     | 4.22  | 0.15    | 0.05     | 21.47 |
| TRIAD3    | 41.87 | 36.92   | 12.27    | 10.43 | 6.36    | 2.18     | 12.59 |
| USP29     | 13.57 | 8.62    | 2.86     | 10.04 | 5.97    | 2.05     | 7.90  |



|          |         |       |       |       |         |       |       |
|----------|---------|-------|-------|-------|---------|-------|-------|
| ANAPC4   | 12.06   | 7.11  | 2.36  | 8.06  | 3.99    | 1.37  | 14.31 |
| KIF3C    | 11.29   | 6.34  | 2.10  | 10.18 | 6.11    | 2.10  | 6.74  |
| MNAT1    | 13.80   | 8.85  | 2.94  | 19.26 | 15.19   | 5.21  | 15.63 |
| PEX10    | 13.98   | 9.03  | 3.00  | 14.29 | 10.22   | 3.51  | 6.35  |
| KIF2A    | 11.47   | 6.52  | 2.16  | 6.62  | 2.55    | 0.88  | 17.40 |
| KIF12    | 15.85   | 10.90 | 3.62  | 16.07 | 12.00   | 4.12  | 26.96 |
| KIF11    | 17.93   | 12.98 | 4.31  | 4.79  | 0.72    | 0.25  | 16.13 |
| KDELR3   | 17.19   | 9.27  | 2.06  | 12.18 | 7.99    | 2.73  | 9.98  |
| NSMAF    | 17.28   | 9.36  | 2.08  | 4.34  | 0.15    | 0.05  | 11.22 |
| GRIK2    | 53.73   | 45.81 | 10.18 | 5.45  | 1.26    | 0.43  | 12.56 |
| SCG3     | 60.68   | 52.76 | 11.73 | 19.15 | 14.96   | 5.10  | 4.75  |
| CD300C   | 20.54   | 12.62 | 2.80  | 17.19 | 13.00   | 4.43  | 4.57  |
| BCL10    | 2.58    | 1.25  | -0.50 | 14.36 | 8.19    | 2.07  | 15.25 |
| BMP8B    | 8.90    | 5.07  | 2.02  | 20.55 | 14.38   | 3.63  | 10.50 |
| CD36     | 6.12    | 2.29  | 0.91  | 15.12 | 8.95    | 2.26  | 13.23 |
| GNRH2    | 9.45    | 5.62  | 2.24  | 11.84 | 5.67    | 1.43  | 21.45 |
| GHRL     | 10.42   | 6.59  | 2.63  | 7.73  | 1.56    | 0.39  | 14.21 |
| KLRC4    | 19.58   | 15.75 | 6.28  | 14.41 | 8.24    | 2.08  | 9.10  |
| KLRD1    | 14.37   | 10.54 | 4.20  | 3.19  | 2.98    | -0.75 | 13.34 |
| GDF1     | 7.47    | 3.64  | 1.45  | 23.04 | 16.87   | 4.26  | 19.76 |
| CD180    | 10.97   | 7.14  | 2.85  | 11.77 | 5.60    | 1.41  | 15.33 |
| LGALS1   | 9.07    | 5.24  | 2.09  | 15.66 | 9.49    | 2.39  | 19.62 |
| CLEC2D   | 10.12   | 6.29  | 2.51  | 19.70 | 13.53   | 3.41  | 14.07 |
| CCDC6    | 538.00  | 8.92  | 5.23  | 2.03  | 830.00  | 14.70 | 10.50 |
| COL9A1   | 547.00  | 9.14  | 5.45  | 2.12  | 642.00  | 21.18 | 16.98 |
| ESR1     | 1100.00 | 2.36  | 1.33  | -0.52 | 2168.00 | 17.44 | 13.24 |
| TNFRSF14 | 1678.00 | 2.98  | 0.71  | -0.28 | 2012.00 | 13.62 | 9.42  |
| TNFRSF1A | 1368.00 | 3.80  | 0.11  | 0.04  | 1600.00 | 26.38 | 22.18 |
| TNFRSF1B | 828.00  | 7.25  | 3.56  | 1.38  | 1782.00 | 26.60 | 22.40 |
| TNFRSF25 | 171.00  | 0.58  | 3.11  | -1.21 | 250.00  | 35.20 | 31.00 |
| NID1     | 2679.00 | 5.79  | 0.79  | 0.25  | 3826.00 | 16.49 | 6.87  |
| NHP2L1   | 394.00  | 13.71 | 8.71  | 2.76  | 504.00  | 9.33  | 3.89  |
| SLC11A2  | 3938.00 | 8.25  | 3.25  | 1.03  | 3496.00 | 10.58 | 4.41  |
| FBN1     | 2917.00 | 12.10 | 7.10  | 2.25  | 3306.00 | 8.98  | 3.74  |
| FAT2     | 2249.00 | 15.61 | 10.61 | 3.36  | 4257.00 | 9.56  | 3.98  |
| CXCL5    | 3076.00 | 19.67 | 13.02 | 2.71  | 1694.00 | 7.44  | 3.23  |
| CLN5     | 4082.00 | 22.17 | 15.52 | 3.23  | 2468.00 | 12.40 | 8.19  |
| CLU      | 2276.00 | 24.96 | 18.31 | 3.81  | 1647.00 | 14.39 | 10.18 |
| CD164    | 2010.00 | 4.88  | 1.77  | -0.37 | 1749.00 | 12.41 | 8.20  |
| HBD      | 1778.00 | 10.97 | 7.44  | 2.77  | 2132.00 | 8.68  | 5.15  |
| GTF2H4   | 1312.00 | 10.67 | 7.14  | 2.66  | 1296.00 | 11.96 | 8.43  |
| GFER     | 6155.00 | 16.65 | 13.12 | 4.89  | 1155.00 | 10.56 | 7.03  |
| OLIG3    | 3133.00 | 13.18 | 7.86  | 2.43  | 1108.00 | 8.03  | 5.00  |
| NUDC     | 2948.00 | 14.04 | 8.72  | 2.69  | 2978.00 | 5.74  | 2.71  |
| PPAPDC1B | 2534.00 | 16.10 | 10.78 | 3.33  | 2601.00 | 2.81  | 0.22  |
| POU6F1   | 3124.00 | 6.02  | 0.70  | 0.22  | 3285.00 | 7.70  | 4.67  |
| RPS29    | 174.00  | 41.38 | 36.69 | 11.80 | 132.00  | 8.33  | 6.54  |

|        |         |       |       |       |         |       |       |
|--------|---------|-------|-------|-------|---------|-------|-------|
| SLIT1  | 1632.00 | 6.92  | 2.23  | 0.72  | 1067.00 | 7.69  | 5.90  |
| XBP1   | 2137.00 | 12.17 | 7.48  | 2.40  | 1503.00 | 1.60  | 0.19  |
| RB1CC1 | 938.00  | 12.79 | 8.10  | 2.61  | 840.00  | 2.02  | 0.23  |
| ABCA3  | 1474.00 | 6.31  | 3.73  | 2.17  | 710.00  | 6.48  | 4.93  |
| AP2A1  | 2034.00 | 1.67  | 0.91  | -0.53 | 1612.00 | 5.71  | 4.16  |
| COPA   | 64.00   | 12.50 | 9.92  | 5.77  | 67.00   | 5.97  | 4.42  |
| C4BPA  | 3958.00 | 6.29  | 3.71  | 2.16  | 3270.00 | 5.38  | 3.83  |
| DEFA1  | 2016.00 | 2.38  | 0.20  | -0.11 | 1942.00 | 6.28  | 4.73  |
| BTC    | 1901.00 | 8.52  | 5.94  | 3.46  | 2547.00 | 2.87  | 1.32  |
| KLK1   | 2555.00 | 4.62  | 1.93  | 0.87  | 628.00  | 11.94 | 9.23  |
| MAGEB1 | 3661.00 | 4.62  | 1.93  | 0.87  | 2400.00 | 7.92  | 5.21  |
| GPX4   | 316.00  | 23.10 | 20.41 | 9.21  | 254.00  | 18.11 | 15.40 |
| LY9    | 2411.00 | 8.38  | 5.69  | 2.57  | 13.00   | 76.92 | 74.21 |
| LAMA5  | 717.00  | 9.34  | 6.65  | 3.00  | 308.00  | 18.51 | 15.80 |
| LAMP1  | 1195.00 | 8.12  | 5.43  | 2.45  | 485.00  | 9.48  | 6.77  |
| PMS2L1 | 1357.00 | 6.93  | 4.55  | 2.63  | 939.00  | 6.82  | 4.29  |
| MYO1E  | 2344.00 | 7.59  | 5.21  | 3.01  | 1789.00 | 1.57  | 0.96  |
| ACSL6  | 2000.00 | 7.40  | 5.02  | 2.90  | 1590.00 | 13.27 | 10.74 |
| ADPGK  | 2796.00 | 6.37  | 3.99  | 2.30  | 3198.00 | 7.60  | 5.07  |
| ACAD9  | 2183.00 | 2.57  | 0.19  | 0.11  | 2311.00 | 6.97  | 4.44  |
| ALG8   | 2984.00 | 3.62  | 1.24  | 0.71  | 4040.00 | 7.85  | 5.32  |
| ACBD3  | 1489.00 | 10.01 | 7.63  | 4.41  | 737.00  | 8.68  | 6.15  |
| NSF    | 2098.00 | 8.20  | 5.82  | 3.36  | 2747.00 | 1.09  | 1.44  |
| MT1F   | 2495.00 | 18.84 | 16.46 | 9.51  | 1273.00 | 3.46  | 0.93  |
| AIM1L  | 3218.00 | 3.42  | 1.04  | 0.60  | 3813.00 | 7.58  | 5.05  |
| ALLC   | 1859.00 | 15.12 | 12.74 | 7.36  | 2182.00 | 13.66 | 11.13 |
| SDCBP  | 1960.00 | 5.26  | 3.90  | 3.07  | 2206.00 | 6.39  | 4.87  |
| SBF1   | 1785.00 | 1.57  | 0.21  | 0.17  | 2722.00 | 4.70  | 3.18  |
| TARS   | 882.00  | 0.45  | 0.91  | -0.71 | 2014.00 | 4.32  | 2.80  |
| SLC1A3 | 540.00  | 2.41  | 1.05  | 0.83  | 1101.00 | 5.27  | 3.75  |
| SYPL1  | 772.00  | 1.55  | 0.19  | 0.15  | 1801.00 | 5.55  | 4.03  |
| PSMC4  | 325.00  | 1.85  | 0.49  | 0.38  | 120.00  | 5.00  | 3.48  |
| PSMC5  | 379.00  | 0.53  | 0.83  | -0.66 | 425.00  | 5.65  | 4.13  |
| RRBP1  | 1323.00 | 0.30  | 1.06  | -0.83 | 1744.00 | 4.87  | 3.35  |
| PSMD1  | 153.00  | 1.96  | 0.60  | 0.47  | 194.00  | 8.25  | 6.73  |
| RPS27A | 274.00  | 4.01  | 2.65  | 2.09  | 360.00  | 5.83  | 4.31  |
| PSMD3  | 466.00  | 2.15  | 0.79  | 0.62  | 461.00  | 8.24  | 6.72  |
|        | 453.00  | 0.22  | 1.14  | -0.90 | 304.00  | 5.26  | 3.74  |
|        | 2163.00 | 2.36  | 1.00  | 0.79  | 1595.00 | 5.27  | 3.75  |
|        | 1422.00 | 5.49  | 4.13  | 3.25  | 1977.00 | 14.32 | 12.80 |
|        | 1516.00 | 0.20  | 1.16  | -0.92 | 1206.00 | 4.89  | 3.37  |
|        | 1488.00 | 4.10  | 2.74  | 2.16  | 2118.00 | 4.25  | 2.73  |
|        | 2560.00 | 6.76  | 5.40  | 4.26  | 1971.00 | 4.11  | 2.59  |
|        | 1804.00 | 9.15  | 7.79  | 6.14  | 2491.00 | 8.71  | 7.19  |
|        | 1283.00 | 3.98  | 2.62  | 2.06  | 1129.00 | 5.67  | 4.15  |
|        | 1554.00 | 4.38  | 3.02  | 2.38  | 924.00  | 7.47  | 5.95  |
| TSPAN4 | 606.00  | 12.38 | 8.79  | 4.99  | 865.00  | 9.71  | 6.91  |

|           |         |       |       |       |         |       |       |
|-----------|---------|-------|-------|-------|---------|-------|-------|
| TMOD1     | 4946.00 | 8.63  | 5.04  | 2.86  | 4065.00 | 4.82  | 2.02  |
| NAPA      | 381.00  | 10.24 | 6.65  | 3.77  | 627.00  | 22.97 | 20.17 |
| TSPYL1    | 759.00  | 8.83  | 5.24  | 2.97  | 1017.00 | 8.65  | 5.85  |
| TUFT1     | 2383.00 | 7.39  | 3.80  | 2.15  | 2186.00 | 5.76  | 2.96  |
| ZNF16     | 1005.00 | 7.76  | 4.17  | 2.37  | 347.00  | 12.68 | 9.88  |
| PLOD3     | 1209.00 | 2.98  | 0.34  | 0.21  | 891.00  | 8.19  | 4.98  |
| PPT2      | 1448.00 | 4.01  | 1.37  | 0.83  | 1371.00 | 8.83  | 5.62  |
| ZNF592    | 1326.00 | 9.58  | 6.94  | 4.24  | 1034.00 | 7.54  | 4.33  |
| SLC16A3   | 657.00  | 5.94  | 3.30  | 2.02  | 731.00  | 4.65  | 1.44  |
| EFTUD2    | 986.00  | 5.17  | 2.53  | 1.55  | 635.00  | 8.03  | 4.82  |
| DOCK4     | 1130.00 | 5.31  | 2.67  | 1.63  | 671.00  | 18.03 | 14.82 |
| VPRBP     | 1322.00 | 3.03  | 0.39  | 0.24  | 1349.00 | 11.27 | 8.06  |
| ZBTB22    | 2702.00 | 5.40  | 2.76  | 1.69  | 2195.00 | 8.75  | 5.54  |
| USP6NL    | 367.00  | 28.61 | 25.97 | 15.89 | 524.00  | 9.54  | 6.33  |
| ARHGAP11A | 764.00  | 8.51  | 6.47  | 4.17  | 1059.00 | 1.13  | 0.76  |
| CTDSPL    | 2857.00 | 6.90  | 4.86  | 3.13  | 1897.00 | 6.80  | 4.91  |
| DNAJC6    | 403.00  | 10.42 | 8.38  | 5.40  | 1035.00 | 5.12  | 3.23  |
| KIAA0125  | 687.00  | 2.91  | 0.87  | 0.56  | 479.00  | 5.64  | 3.75  |
| INADL     | 4014.00 | 8.74  | 6.70  | 4.32  | 1907.00 | 6.66  | 4.77  |
| PLEKHM1   | 3436.00 | 5.21  | 3.17  | 2.04  | 2714.00 | 6.26  | 4.37  |
| EPM2AIP1  | 1985.00 | 8.16  | 6.12  | 3.95  | 1346.00 | 4.46  | 2.57  |
| SLMO1     | 3382.00 | 6.68  | 4.64  | 2.99  | 2556.00 | 5.79  | 3.90  |
| ATP5L     | 3339.00 | 7.01  | 4.97  | 3.20  | 2426.00 | 1.36  | 0.53  |
| PSMD6     | 224.00  | 5.36  | 3.32  | 2.14  | 131.00  | 17.56 | 15.67 |
| TGOLN2    | 632.00  | 3.48  | 1.44  | 0.93  | 564.00  | 14.89 | 13.00 |
| SNAPC5    | 1374.00 | 1.24  | 0.80  | -0.52 | 367.00  | 11.72 | 9.83  |
| SFRS14    | 2005.00 | 8.23  | 6.19  | 3.99  | 2067.00 | 4.45  | 2.56  |
| TBC1D4    | 2671.00 | 1.98  | 0.06  | -0.03 | 2880.00 | 6.91  | 5.02  |
| RBM8A     | 505.00  | 8.32  | 6.28  | 4.05  | 414.00  | 8.21  | 6.32  |
| TOMM40    | 955.00  | 7.64  | 5.60  | 3.61  | 2219.00 | 5.68  | 3.79  |
| NXF1      | 521.00  | 16.70 | 14.66 | 9.45  | 212.00  | 22.64 | 20.75 |
| PCID1     | 479.00  | 6.89  | 4.85  | 3.13  | 469.00  | 8.32  | 6.43  |
| SLC25A17  | 310.00  | 15.16 | 13.12 | 8.46  | 396.00  | 7.32  | 5.43  |
| SPAG11B   | 2977.00 | 6.79  | 4.75  | 3.06  | 1495.00 | 6.09  | 4.20  |
| COG5      | 2175.00 | 1.75  | 0.29  | -0.19 | 1124.00 | 5.16  | 3.27  |
| PRSS23    | 2189.00 | 6.85  | 3.77  | 2.16  | 2848.00 | 3.37  | 0.46  |
| AP4B1     | 1388.00 | 7.49  | 4.41  | 2.52  | 1776.00 | 4.22  | 1.31  |
| CHL1      | 4439.00 | 9.55  | 6.47  | 3.70  | 3394.00 | 4.66  | 1.75  |
| LILRB3    | 3569.00 | 5.69  | 2.61  | 1.49  | 2704.00 | 9.17  | 6.26  |
| PROSC     | 2697.00 | 7.08  | 4.00  | 2.29  | 1047.00 | 10.51 | 7.60  |
| PRAF2     | 2340.00 | 4.40  | 1.32  | 0.75  | 1045.00 | 7.75  | 4.84  |
| KIAA1009  | 4016.00 | 7.59  | 4.51  | 2.58  | 4123.00 | 10.94 | 8.03  |
| COPZ1     | 486.00  | 10.29 | 7.21  | 4.12  | 290.00  | 10.00 | 7.09  |
| COG2      | 3188.00 | 6.65  | 3.57  | 2.04  | 2676.00 | 4.56  | 1.65  |
| DDX42     | 2142.00 | 5.04  | 1.96  | 1.12  | 1843.00 | 8.68  | 5.77  |
| POFUT1    | 2866.00 | 6.91  | 4.46  | 3.24  | 3079.00 | 7.11  | 1.59  |
| DMXL2     | 3437.00 | 6.75  | 4.30  | 3.12  | 2498.00 | 3.76  | 1.76  |

|          |         |       |       |       |         |       |       |
|----------|---------|-------|-------|-------|---------|-------|-------|
| COTL1    | 1411.00 | 9.07  | 6.62  | 4.80  | 804.00  | 5.60  | 0.08  |
| ZZEF1    | 3131.00 | 5.24  | 2.79  | 2.02  | 2421.00 | 0.70  | 4.82  |
| TTC28    | 2364.00 | 7.53  | 5.08  | 3.69  | 2445.00 | 2.82  | 2.70  |
| SIGLEC7  | 2483.00 | 7.17  | 2.65  | 0.87  | 1642.00 | 8.34  | 5.83  |
| TRAPPC3  | 1533.00 | 11.81 | 7.29  | 2.38  | 1435.00 | 6.97  | 4.46  |
| PRELID1  | 3433.00 | 12.21 | 7.69  | 2.51  | 2022.00 | 2.28  | 0.24  |
| #####    | 1601.00 | 1.87  | 2.65  | -0.87 | 2819.00 | 7.73  | 5.22  |
| ZNF639   | 1877.00 | 12.52 | 7.53  | 2.54  | 1184.00 | 7.26  | 5.30  |
| SS18L2   | 881.00  | 15.10 | 10.11 | 3.41  | 801.00  | 13.36 | 11.40 |
| IFT52    | 4253.00 | 11.95 | 6.96  | 2.35  | 2121.00 | 3.35  | 1.39  |
| AMZ2     | 4370.00 | 11.88 | 6.89  | 2.33  | 1965.00 | 1.12  | 0.84  |
| IL17D    | 2297.00 | 14.80 | 9.77  | 2.09  | 2534.00 | 14.88 | 12.45 |
| ATPBD1B  | 2545.00 | 14.62 | 9.59  | 2.05  | 1512.00 | 8.47  | 6.04  |
| C21orf41 | 2448.00 | 14.95 | 9.92  | 2.12  | 1992.00 | 7.73  | 5.30  |
| BCOR     | 351.00  | 9.97  | 6.66  | 2.12  | 348.00  | 8.05  | 4.65  |
| TEX10    | 817.00  | 8.08  | 4.77  | 1.52  | 1452.00 | 17.42 | 14.02 |
| TMEM70   | 4044.00 | 11.85 | 8.54  | 2.71  | 2967.00 | 8.09  | 4.69  |
| FLJ20581 | 2120.00 | 10.09 | 6.78  | 2.16  | 1888.00 | 9.16  | 5.76  |
| NUDT11   | 880.00  | 9.20  | 5.89  | 1.87  | 503.00  | 18.09 | 14.69 |
| NADSYN1  | 2939.00 | 5.61  | 2.30  | 0.73  | 1676.00 | 14.80 | 11.40 |
| IPO9     | 588.00  | 19.56 | 10.07 | 2.13  | 744.00  | 20.97 | 9.53  |
| LARP6    | 468.00  | 40.17 | 30.69 | 6.49  | 420.00  | 24.05 | 12.61 |
| FLJ10357 | 402.00  | 24.88 | 15.39 | 3.25  | 520.00  | 28.65 | 17.22 |
| C4orf20  | 533.00  | 23.27 | 13.78 | 2.91  | 835.00  | 21.20 | 9.76  |
| LIN7C    | 611.00  | 26.19 | 16.70 | 3.53  | 1094.00 | 23.04 | 11.60 |
| PCDHGC4  | 2901.00 | 19.17 | 9.68  | 2.05  | 1797.00 | 25.54 | 14.11 |
| SLC35E3  | 786.00  | 24.43 | 14.94 | 3.16  | 2182.00 | 25.30 | 13.86 |
| SMPD4    | 323.00  | 36.22 | 26.74 | 5.65  | 1840.00 | 25.27 | 13.84 |
| ZDHHC7   | 272.00  | 36.03 | 26.54 | 5.61  | 2040.00 | 23.33 | 11.90 |
| ELAC1    | 320.00  | 27.19 | 17.70 | 3.74  | 1693.00 | 27.23 | 15.79 |
| TRIM36   | 625.00  | 36.00 | 26.51 | 5.60  | 1530.00 | 23.14 | 11.70 |
| THUMPD1  | 168.00  | 36.91 | 27.42 | 5.80  | 812.00  | 27.83 | 16.40 |
| TTC27    | 418.00  | 37.80 | 28.31 | 5.98  | 2124.00 | 25.14 | 13.71 |
| TRMT1    | 1063.00 | 19.10 | 9.61  | 2.03  | 3162.00 | 26.34 | 14.91 |
| DDX28    | 2001.00 | 19.69 | 10.20 | 2.16  | 2188.00 | 23.45 | 12.01 |
| MBNL3    | 556.00  | 28.06 | 18.57 | 3.93  | 622.00  | 32.48 | 21.04 |
| METTL2B  | 1064.00 | 29.32 | 19.84 | 4.19  | 828.00  | 27.17 | 15.74 |
| CACNA2D3 | 1492.00 | 21.38 | 11.90 | 2.51  | 1852.00 | 20.79 | 9.35  |
| ZNF302   | 450.00  | 23.11 | 13.63 | 2.88  | 1212.00 | 21.29 | 9.85  |
| TEX13A   | 876.00  | 23.74 | 13.43 | 2.73  | 1071.00 | 18.86 | 8.67  |
| TBX20    | 1892.00 | 22.52 | 12.20 | 2.48  | 1298.00 | 22.34 | 12.15 |
| TEX12    | 2703.00 | 23.31 | 12.99 | 2.65  | 1822.00 | 27.39 | 17.19 |
| PLSCR2   | 749.00  | 26.04 | 15.72 | 3.20  | 1027.00 | 22.01 | 11.81 |
| BBX      | 2270.00 | 18.72 | 8.40  | 1.71  | 1618.00 | 20.83 | 10.64 |
| KIAA1219 | 4592.00 | 21.34 | 11.02 | 2.24  | 2761.00 | 23.43 | 13.24 |
| KCNK12   | 2669.00 | 20.38 | 10.06 | 2.05  | 2241.00 | 23.43 | 13.23 |
| MUC13    | 1763.00 | 21.04 | 10.73 | 2.18  | 2777.00 | 16.24 | 6.05  |

|           |         |       |       |      |         |       |       |
|-----------|---------|-------|-------|------|---------|-------|-------|
| C11orf75  | 2142.00 | 30.72 | 20.40 | 4.15 | 2997.00 | 25.23 | 15.03 |
| C11orf16  | 1052.00 | 32.41 | 22.10 | 4.50 | 901.00  | 27.86 | 17.67 |
| CA10      | 1712.00 | 32.54 | 22.22 | 4.52 | 2676.00 | 21.56 | 11.37 |
| TMEM9B    | 1050.00 | 31.62 | 21.30 | 4.34 | 1798.00 | 19.47 | 9.27  |
| ASCL3     | 1474.00 | 30.26 | 19.94 | 4.06 | 2526.00 | 19.56 | 9.36  |
| SPPL2B    | 2285.00 | 23.81 | 13.49 | 2.75 | 4269.00 | 12.81 | 2.62  |
| CNOT6     | 4165.00 | 16.09 | 5.77  | 1.17 | 2911.00 | 26.42 | 16.22 |
| C20orf74  | 3949.00 | 24.18 | 13.87 | 2.82 | 2806.00 | 26.52 | 16.32 |
| HHATL     | 4240.00 | 20.09 | 9.78  | 1.99 | 3611.00 | 20.99 | 10.80 |
| TBC1D24   | 2143.00 | 23.57 | 13.25 | 2.70 | 1897.00 | 23.30 | 13.11 |
| PRSS22    | 3002.00 | 26.35 | 16.91 | 3.45 | 4360.00 | 12.48 | 2.52  |
| SEMA4G    | 844.00  | 34.36 | 24.92 | 5.09 | 1654.00 | 20.74 | 10.78 |
| ZBTB2     | 683.00  | 25.62 | 16.19 | 3.30 | 1689.00 | 16.05 | 6.08  |
| KIAA1486  | 224.00  | 48.66 | 39.22 | 8.00 | 436.00  | 20.41 | 10.45 |
| SLC7A14   | 694.00  | 19.60 | 10.16 | 2.07 | 3494.00 | 14.11 | 4.15  |
| KIAA1604  | 276.00  | 32.25 | 22.81 | 4.65 | 347.00  | 31.12 | 21.16 |
| MRPS14    | 4124.00 | 28.37 | 18.93 | 3.86 | 4100.00 | 20.49 | 10.53 |
| TRMT11    | 3576.00 | 21.76 | 12.32 | 2.51 | 4372.00 | 14.43 | 4.47  |
| C20orf51  | 4203.00 | 29.53 | 20.09 | 4.10 | 3352.00 | 21.69 | 11.73 |
| LOC63928  | 3492.00 | 19.53 | 10.09 | 2.06 | 5036.00 | 17.75 | 7.79  |
| PPCDC     | 2463.00 | 20.30 | 10.86 | 2.22 | 3550.00 | 16.37 | 6.41  |
| NIF3L1    | 2422.00 | 24.07 | 14.63 | 2.99 | 4148.00 | 16.32 | 6.36  |
| CIDEC     | 3538.00 | 20.04 | 10.60 | 2.16 | 3699.00 | 13.90 | 3.94  |
| FAM113A   | 2659.00 | 20.23 | 9.66  | 2.19 | 1777.00 | 15.93 | 4.28  |
| FASTKD3   | 3372.00 | 24.05 | 13.48 | 3.05 | 3173.00 | 26.35 | 14.70 |
| C20orf116 | 4071.00 | 26.97 | 16.40 | 3.71 | 5622.00 | 21.93 | 10.29 |
| ELOVL6    | 2654.00 | 20.61 | 10.04 | 2.27 | 4225.00 | 23.31 | 11.67 |
| MRPS34    | 3013.00 | 23.33 | 12.76 | 2.89 | 4056.00 | 17.06 | 5.42  |
| MGC2752   | 2845.00 | 22.32 | 11.75 | 2.66 | 2858.00 | 22.39 | 10.75 |
| LRR61     | 1078.00 | 29.13 | 18.56 | 4.20 | 1319.00 | 22.82 | 11.18 |
| METT10D   | 2366.00 | 19.02 | 8.45  | 1.91 | 2471.00 | 20.88 | 9.24  |
| TMEM108   | 1527.00 | 24.69 | 14.12 | 3.20 | 2174.00 | 17.16 | 5.51  |
| ATG9A     | 2022.00 | 26.11 | 15.54 | 3.52 | 5052.00 | 30.48 | 18.84 |
| C14orf139 | 2036.00 | 11.00 | 0.52  | 0.12 | 1876.00 | 19.56 | 9.85  |
| SETD6     | 4157.00 | 19.75 | 9.27  | 2.06 | 3478.00 | 16.79 | 7.07  |
| MAGIX     | 2860.00 | 23.88 | 13.40 | 2.98 | 2357.00 | 13.66 | 3.94  |
| SGK269    | 4515.00 | 22.99 | 12.51 | 2.79 | 3744.00 | 15.04 | 5.32  |
| ATAD5     | 4338.00 | 20.70 | 10.22 | 2.28 | 2216.00 | 21.48 | 11.76 |
| LONRF3    | 2849.00 | 21.41 | 10.93 | 2.43 | 1595.00 | 26.40 | 16.68 |
| FLJ22028  | 4175.00 | 23.88 | 13.40 | 2.98 | 3428.00 | 17.18 | 7.46  |
| BTNL8     | 4552.00 | 20.56 | 10.08 | 2.24 | 2710.00 | 23.36 | 13.64 |
| FLJ14154  | 1656.00 | 21.32 | 10.84 | 2.41 | 1245.00 | 20.24 | 10.52 |
| ZDHHC11   | 1805.00 | 21.88 | 11.41 | 2.54 | 882.00  | 25.17 | 15.45 |
| C12orf31  | 4752.00 | 35.82 | 16.98 | 2.44 | 4242.00 | 30.17 | 14.49 |
| YPEL3     | 4652.00 | 27.06 | 8.22  | 1.18 | 3565.00 | 30.21 | 14.53 |
| C6orf141  | 3904.00 | 23.03 | 11.42 | 2.28 | 3734.00 | 14.25 | 4.44  |
| NFXL1     | 5310.00 | 30.53 | 15.93 | 2.92 | 4097.00 | 34.76 | 23.04 |

|           |         |       |       |       |         |       |       |
|-----------|---------|-------|-------|-------|---------|-------|-------|
| C3orf30   | 4373.00 | 27.19 | 12.59 | 2.31  | 5142.00 | 26.29 | 14.57 |
| ZNF600    | 2366.00 | 21.43 | 9.67  | 2.02  | 4699.00 | 12.09 | 2.60  |
| SLC39A12  | 1227.00 | 12.71 | 8.18  | 2.21  | 795.00  | 25.41 | 19.16 |
| ZNF584    | 645.00  | 12.09 | 7.56  | 2.04  | 453.00  | 20.75 | 14.50 |
| C10orf111 | 892.00  | 13.68 | 9.15  | 2.47  | 286.00  | 24.13 | 17.88 |
| ZSCAN4    | 609.00  | 13.47 | 8.94  | 2.41  | 566.00  | 20.85 | 14.60 |
| STT3B     | 935.00  | 7.59  | 3.06  | 0.83  | 609.00  | 21.51 | 15.26 |
| DNHD2     | 726.00  | 9.78  | 5.25  | 1.42  | 611.00  | 27.82 | 21.57 |
| EPHA6     | 1229.00 | 19.45 | 14.92 | 4.03  | 1984.00 | 14.32 | 8.07  |
| ATP5L2    | 410.00  | 22.93 | 12.79 | 2.74  | 299.00  | 31.77 | 24.67 |
| MPV17L    | 576.00  | 13.02 | 2.88  | 0.62  | 231.00  | 40.69 | 33.59 |
| PLAC2     | 3396.00 | 20.67 | 10.53 | 2.26  | 1470.00 | 26.74 | 19.64 |
| C14orf177 | 1588.00 | 29.03 | 18.89 | 4.05  | 722.00  | 6.23  | 0.87  |
| C11orf35  | 1030.00 | 22.14 | 12.00 | 2.57  | 523.00  | 8.03  | 0.93  |
| KIAA1267  | 367.00  | 20.71 | 16.27 | 4.98  | 412.00  | 8.98  | 2.53  |
| FLJ40504  | 210.00  | 14.29 | 9.85  | 3.01  | 319.00  | 18.18 | 11.73 |
| IGSF10    | 385.00  | 16.62 | 12.18 | 3.73  | 393.00  | 13.49 | 7.04  |
| MGC72104  | 276.00  | 9.42  | 4.98  | 1.52  | 262.00  | 25.95 | 19.50 |
| C20orf91  | 645.00  | 19.07 | 14.63 | 4.48  | 262.00  | 18.32 | 11.87 |
| TMEM145   | 868.00  | 12.44 | 8.00  | 2.45  | 648.00  | 14.51 | 8.06  |
| UNQ473    | 894.00  | 14.21 | 9.77  | 2.99  | 1002.00 | 10.08 | 3.63  |
| LOC284788 | 1821.00 | 11.64 | 7.20  | 2.20  | 1252.00 | 10.46 | 4.01  |
| FLJ40235  | 801.00  | 6.99  | 2.55  | 0.78  | 890.00  | 23.26 | 16.81 |
| TRIM59    | 622.00  | 4.50  | 1.35  | -0.40 | 385.00  | 17.14 | 9.59  |
| TRIML1    | 303.00  | 15.84 | 9.99  | 2.96  | 347.00  | 27.09 | 19.54 |
| DHRS4L2   | 248.00  | 22.18 | 16.33 | 4.84  | 391.00  | 17.14 | 9.59  |
| C3orf35   | 2111.00 | 14.83 | 8.98  | 2.66  | 786.00  | 17.94 | 10.39 |
| KY        | 1350.00 | 20.22 | 14.37 | 4.26  | 1014.00 | 22.88 | 15.33 |
| SNAI3     | 845.00  | 12.78 | 6.93  | 2.05  | 614.00  | 21.34 | 13.79 |
| KCNK18    | 2971.00 | 13.06 | 7.21  | 2.14  | 1104.00 | 6.70  | 0.85  |
| FREM2     | 1522.00 | 7.03  | 1.18  | 0.35  | 1354.00 | 20.68 | 13.13 |
| LOC338758 | 2216.00 | 10.83 | 4.98  | 1.48  | 1806.00 | 20.43 | 12.88 |
| SYCN      | 1653.00 | 14.22 | 8.37  | 2.48  | 1872.00 | 22.49 | 14.94 |
| LCE2A     | 372.00  | 12.90 | 7.17  | 2.17  | 222.00  | 30.18 | 26.47 |
| KCTD4     | 699.00  | 14.02 | 8.29  | 2.51  | 470.00  | 16.38 | 12.67 |
| LGICZ1    | 549.00  | 15.48 | 9.75  | 2.95  | 453.00  | 16.34 | 12.63 |
| SLCO4C1   | 150.00  | 28.00 | 22.27 | 6.74  | 462.00  | 3.46  | 0.25  |
| C4orf11   | 666.00  | 12.76 | 7.03  | 2.13  | 860.00  | 12.79 | 9.08  |
| HILS1     | 1725.00 | 1.10  | 4.63  | -1.40 | 1755.00 | 12.25 | 8.54  |
| FLJ44874  | 347.00  | 21.61 | 15.88 | 4.81  | 360.00  | 5.56  | 1.85  |
| LOC374395 | 1931.00 | 9.53  | 3.80  | 1.15  | 369.00  | 23.58 | 19.87 |
| C5orf25   | 1210.00 | 7.85  | 2.12  | 0.64  | 810.00  | 18.77 | 15.06 |
| FAM39B    | 2478.00 | 12.59 | 6.86  | 2.08  | 1443.00 | 0.90  | 2.81  |
| C19orf45  | 1185.00 | 18.73 | 13.00 | 3.94  | 875.00  | 7.09  | 3.38  |
| C1orf187  | 309.00  | 11.65 | 5.92  | 1.79  | 714.00  | 14.99 | 11.28 |

0.02

1.63

**Roughly 1.6% of genes**

| abs dev | robust Z |                     |
|---------|----------|---------------------|
| 55.76   | 11.46    | toxic a,b,c         |
| 20.34   | 4.18     | toxic a,b,c         |
| 13.80   | 2.83     | toxic a,b,c         |
| 12.52   | 2.57     | toxic a,b           |
| 0.03    | 0.01     | toxic a,b,c         |
| 4.81    | -0.88    | debris a,c          |
| 11.10   | 2.02     | art b,c             |
| 3.85    | -0.70    | toxic a,b,c         |
| 30.09   | 5.48     | toxic a,b,c         |
| 0.74    | 0.22     | debris b            |
| 9.14    | 2.74     | toxic a,b,c         |
| 2.23    | 0.67     | debris b,c          |
| 11.84   | 3.55     | b artifact          |
| 2.87    | -0.75    | toxic a,b,c         |
| 6.28    | 1.64     | toxic a,b,c         |
| 1.31    | 0.70     | toxic a,c           |
| 8.19    | 4.37     | toxic a, artifact b |
| 7.13    | 3.81     | artifact a          |
| 1.33    | -0.71    | toxic a,b,c         |
| 4.48    | 1.74     | toxic b,c           |
| 5.25    | 2.04     | art a,b,c           |
| 0.54    | -0.21    | art. b,c            |
| 5.62    | 2.18     | toxic b,c           |
| 13.74   | 5.08     | art.b               |
| 3.11    | 1.26     | txc a,b,c           |
| 6.48    | 2.21     | toxic a,b,c         |
| 9.35    | 3.19     | toxic a,b,c         |
| 17.25   | 5.89     | toxic a,b,c         |
| 9.25    | 3.16     | toxic a,b,c         |
| 12.68   | 4.33     | toxic a,b,c         |
| 9.89    | 3.38     | toxic a,b,c         |
| 7.50    | 2.56     | toxic a,b,c         |
| 46.28   | 15.80    | toxic a,b,c         |
| 6.64    | 2.27     | toxic a             |
| 9.91    | 3.38     | toxic a             |
| 8.49    | 2.90     | toxic a,b           |
| 2.83    | 0.97     | toxic a             |
| 8.75    | 2.99     | toxic a,b           |
| 11.48   | 3.92     | toxic a,b           |
| 13.49   | 4.60     | toxic a,b           |
| 9.84    | 3.36     | toxic a,b           |
| 8.55    | 2.92     | toxic a,b           |
| 15.56   | 4.50     | toxic a,b           |
| 6.68    | 1.96     | debris b,c          |
| 1.99    | 0.62     | debris b,c          |



|       |         |       |         |                |
|-------|---------|-------|---------|----------------|
| 8.40  |         | 2.45  |         | toxic b,c      |
| 0.83  |         | 0.29  |         | toxic a,c      |
| 9.72  |         | 2.83  |         | toxic a,b      |
| 0.44  |         | 0.18  |         | toxic a,b      |
| 11.49 |         | 3.34  |         | toxic a,b,c    |
| 21.05 |         | 6.07  |         | toxic a,b,c    |
| 10.22 |         | 2.97  |         | toxic a,b,c    |
| 6.14  |         | 2.21  |         | toxic a,b,c    |
| 7.38  |         | 2.65  |         | art b,c        |
| 8.72  |         | 3.13  |         | toxic a        |
| 0.91  |         | 0.33  |         | toxic a,b,c    |
| 0.73  |         | 0.26  |         | toxic a,b,c    |
| 9.45  |         | 2.69  |         | toxic a,b      |
| 4.70  |         | 1.34  |         | toxic a,b,c    |
| 7.43  |         | 2.12  |         | toxic a,b      |
| 15.65 |         | 4.45  |         | toxic a,b      |
| 8.41  |         | 2.39  |         | debris B,c     |
| 3.30  |         | 0.94  |         | toxic a,b      |
| 7.54  |         | 2.15  |         | art a,b        |
| 13.96 |         | 3.97  |         | toxic a,b,c    |
| 9.53  |         | 2.71  |         | toxic a,b,c    |
| 13.82 |         | 3.93  |         | toxic a,b,c    |
| 8.27  |         | 2.36  |         | toxic a,b,c    |
| 3.36  | 1729.00 | 0.95  | 0.36 x  | toxic a,b,c    |
| 5.43  | 1148.00 | 4.20  | 1.57 x  | toxic a,b      |
| 4.23  | 2117.00 | 8.01  | 2.99 x  | tox a,art b,c  |
| 3.01  | 2955.00 | 5.60  | 2.09 x  | toxic a,b      |
| 7.09  | 2348.00 | 8.57  | 3.20 x  | toxic b,c      |
| 7.16  | 1297.00 | 22.83 | 8.52 x  | toxic a,b      |
| 9.91  | 360.00  | 11.48 | 4.28 x  | toxic a,b      |
| 5.50  | 3669.00 | 7.80  | 2.21 x  | art. A,c       |
| 2.40  | 591.00  | 7.10  | 2.01 x  | toxic a,b,c    |
| 2.95  | 5064.00 | 10.50 | 2.98    | debris b,c     |
| 2.26  | 3182.00 | 5.83  | 1.65 x  | debris b,c     |
| 2.51  | 2267.00 | 4.81  | 1.36 x  | debris b,c     |
| 1.01  | 2649.00 | 3.79  | 2.08 x  | art b,c        |
| 2.57  | 2326.00 | 3.56  | 1.96 x  | art a,c        |
| 3.19  | 1721.00 | 3.02  | 1.66 x  | toxic b,c      |
| 2.57  | 2026.00 | 4.93  | 2.71 x  | art a,c, tox b |
| 2.01  | 1173.00 | 0.67  | -0.24 x | tox a,c        |
| 3.29  | 1269.00 | 6.33  | 2.30 x  | toxic a,b,c    |
| 2.74  | 1415.00 | 2.15  | -0.78 x | toxic b,c      |
| 2.35  | 2200.00 | 0.38  | -0.16 x | toxic b        |
| 1.28  | 3702.00 | 9.49  | 4.01 x  | debris a,c     |
| -0.10 | 2785.00 | 9.71  | 4.10 x  | debris b,c     |
| 2.20  | 5310.00 | 5.28  | 2.23 x  | debris a,b     |
| 4.36  | 99.00   | 9.27  | 4.90 x  | toxic a,b,c    |

|       |         |       |         |                   |
|-------|---------|-------|---------|-------------------|
| 3.93  | 1896.00 | 4.96  | 2.62 x  | toxic,b,c         |
| -0.13 | 2547.00 | 3.94  | 2.08 x  | debris b,c        |
| 0.16  | 1565.00 | 4.31  | 2.28 x  | tox a,b,c         |
| 3.46  | 665.00  | 7.87  | 3.75 x  | toxic a,b,c       |
| 2.92  | 1578.00 | 7.16  | 3.41 x  | toxic b,c         |
| 3.10  | 43.00   | 6.64  | 3.16 x  | toxic a,b,c       |
| 2.69  | 2579.00 | 2.34  | 1.11 x  | debris a,b        |
| 3.32  | 1542.00 | 5.06  | 2.41 x  | toxic b,c         |
| 0.92  | 747.00  | 7.51  | 3.58 x  | toxic a,b,c       |
| 4.28  | 1590.00 | 10.35 | 3.96 x  | toxic b,c         |
| 2.41  | 3399.00 | 7.42  | 2.84 x  | debris a,b        |
| 7.14  | 621.00  | 1.56  | 0.60 x  | toxic a,b,c       |
| 34.39 | 2101.00 | 1.46  | 0.56 x  | toxic b           |
| 7.32  | 934.00  | 2.36  | -0.90 x | toxic a,b,c       |
| 3.14  | 870.00  | 2.42  | -0.93 x | toxic a,b,c       |
| 2.09  | 1251.00 | 0.24  | 0.15 x  | toxic a,b,c       |
| -0.47 | 2898.00 | 6.47  | 3.94 x  | debris a,b        |
| 5.24  | 1573.00 | 2.04  | 1.24 x  | toxic b,c,        |
| 2.47  | 2176.00 | 2.30  | 1.40 x  | art a,c           |
| 2.16  | 1066.00 | 3.66  | 2.23 x  | debris a,tox c    |
| 2.59  | 2594.00 | 3.47  | 2.12 x  | debris a,c        |
| 3.00  | 907.00  | 2.47  | 1.51 x  | toxic a,b,c       |
| -0.70 | 1803.00 | 3.72  | 2.27 x  | toxic a,b         |
| 0.45  | 1706.00 | 5.05  | 3.08 x  | toxic b,c,        |
| 2.46  | 4399.00 | 5.50  | 3.35 x  | debris a,b        |
| 5.42  | 1814.00 | 4.18  | 2.55 x  | toxic a,c         |
| 3.74  | 2748.00 | 6.75  | 3.38 x  | toxic a, art b    |
| 2.44  | 2181.00 | 10.20 | 5.12 x  | debris a,c        |
| 2.15  | 1084.00 | 5.25  | 2.63 x  | toxic a, c        |
| 2.88  | 1067.00 | 7.99  | 4.01 x  | toxic a, b c      |
| 3.10  | 1435.00 | 4.84  | 2.43 x  | toxic a,b,c       |
| 2.67  | 233.00  | 7.31  | 3.67 x  | toxic a,b,c       |
| 3.17  | 497.00  | 6.12  | 3.07 x  | toxic a,b,c       |
| 2.58  | 1848.00 | 6.37  | 3.19 x  | toxic a,b,c       |
| 5.17  | 113.00  | 18.22 | 9.14 x  | toxic a,b,c       |
| 3.31  | 411.00  | 12.23 | 6.13 x  | toxic a,b,c       |
| 5.16  | 454.00  | 7.78  | 3.90 x  | toxic a,b,c       |
| 2.87  | 336.00  | 6.50  | 3.26 x  | toxic a,b,c       |
| 2.88  | 1230.00 | 7.22  | 3.62 x  | toxic a,b,c       |
| 9.83  | 1389.00 | 5.21  | 2.61 x  | toxic a,b,c       |
| 2.59  | 2077.00 | 4.80  | 2.41 x  | toxic a,b         |
| 2.10  | 2259.00 | 0.71  | -0.36 x | debris a          |
| 1.99  | 1995.00 | 4.04  | 2.02 x  | tox b,c           |
| 5.52  | 2493.00 | 4.85  | 2.43 x  | tox a, debris b,c |
| 3.19  | 1771.00 | 0.72  | -0.36 x | toxic a,b,c       |
| 4.57  | 3093.00 | 0.84  | 0.42 x  | toxic a,b         |
| 4.43  | 739.00  | 1.10  | 0.62 x  | toxic a,b,c       |

|       |         |       |         |                  |
|-------|---------|-------|---------|------------------|
| 1.30  | 4134.00 | 6.54  | 3.68 x  | art a,b          |
| 12.93 | 568.00  | 10.45 | 5.87 x  | toxic a,b,c      |
| 3.75  | 824.00  | 2.06  | 1.16 x  | toxic a,b,c      |
| 1.90  | 1599.00 | 8.49  | 4.77 x  | toxic a,b        |
| 6.33  | 362.00  | 6.58  | 3.70 x  | toxic a,b,c      |
| 2.83  | 688.00  | 6.70  | 2.98 x  | toxic a,b,c      |
| 3.18  | 988.00  | 9.51  | 4.23 x  | toxic a,b,c      |
| 2.46  | 832.00  | 10.42 | 4.64 x  | toxic a,b,c      |
| 0.82  | 522.00  | 6.16  | 2.74 x  | toxic a,b,c      |
| 2.73  | 734.00  | 11.81 | 5.25 x  | toxic a,b,c      |
| 8.40  | 765.00  | 4.54  | 2.02 x  | toxic a,b,c      |
| 4.57  | 846.00  | 8.78  | 3.91 x  | toxic a,b,c      |
| 3.14  | 2933.00 | 4.56  | 2.03 x  | debris a,b       |
| 3.59  | 235.00  | 8.02  | 3.57 x  | toxic a,b,c      |
| -0.49 | 1172.00 | 4.45  | 2.72 x  | toxic a,b,c      |
| 3.17  | 2614.00 | 2.21  | 1.35 x  | debris a,b       |
| 2.09  | 583.00  | 7.15  | 4.36 x  | toxic a,b,c      |
| 2.42  | 437.00  | 6.01  | 3.67 x  | toxic a,b,c      |
| 3.08  | 2173.00 | 0.62  | -0.38 x | debris a         |
| 2.83  | 3403.00 | 1.68  | 1.03 x  | debris a         |
| 1.66  | 1423.00 | 8.57  | 5.23 x  | toxic a,b,c      |
| 2.52  | 3677.00 | 2.68  | 1.64 x  | debris a         |
| -0.34 | 2823.00 | 5.72  | 3.49 x  | debris a         |
| 10.13 | 91.00   | 0.84  | 0.51 x  | toxic a,b,c      |
| 8.40  | 253.00  | 4.65  | 2.84 x  | toxic a,b,c      |
| 6.35  | 653.00  | 7.95  | 4.86 x  | toxic a,b,c      |
| 1.65  | 1476.00 | 3.43  | 2.10 x  | toxic c          |
| 3.24  | 2591.00 | 3.60  | 2.20 x  | debris a,b       |
| 4.09  | 495.00  | 1.18  | 0.72 x  | toxic a,b,c      |
| 2.45  | 2316.00 | 4.62  | 2.82 x  | toxic a, art b,c |
| 13.41 | 245.00  | 12.23 | 7.47 x  | toxic a,b,c      |
| 4.15  | 808.00  | 0.02  | 0.01 x  | toxic a,b,c      |
| 3.51  | 835.00  | 2.33  | 1.42 x  | toxic a,b,c      |
| 2.71  | 3294.00 | 3.10  | 1.89 x  | toxic b          |
| 2.11  | 1348.00 | 3.33  | 2.03 x  | toxic b,c        |
| 0.24  | 3108.00 | 3.92  | 2.92 x  | debris a,b       |
| 0.69  | 2068.00 | 4.77  | 3.55 x  | toxic a,b        |
| 0.92  | 4863.00 | 2.91  | 2.17 x  | art a,b          |
| 3.29  | 2723.00 | 2.70  | 2.01 x  | debris a,b       |
| 3.99  | 1678.00 | 0.62  | -0.47 x | toxic b,c        |
| 2.54  | 1148.00 | 6.33  | 4.72 x  | toxic b,c        |
| 4.22  | 4087.00 | 2.65  | 1.97 x  | debris a,b       |
| 3.72  | 404.00  | 0.19  | 0.14 x  | toxic a,b,c      |
| 0.87  | 2234.00 | 3.17  | 2.36 x  | debris a,b       |
| 3.03  | 2179.00 | 10.19 | 7.59 x  | toxic b          |
| 0.96  | 2494.00 | 5.98  | 3.69 x  | debris a,b       |
| 0.35  | 4331.00 | 10.20 | 6.30 x  | debris a         |

|       |         |       |         |                  |
|-------|---------|-------|---------|------------------|
| 0.69  | 1297.00 | 6.58  | 4.06 x  | toxic a,b,c      |
| -0.21 | 2716.00 | 6.76  | 4.17    | debris a.b       |
| 0.18  | 2907.00 | 3.60  | 2.22 x  | debris a,b       |
| 3.12  | 1599.00 | 6.82  | 2.86 x  | art b            |
| 2.39  | 562.00  | 0.85  | -0.36 x | debris b         |
| -0.13 | 2045.00 | 4.87  | 2.04 x  | debris b,c       |
| 2.79  | 2565.00 | 5.61  | 2.35 x  | debris a,b       |
| 3.31  | 1413.00 | 5.38  | 1.50 x  | debris a,b       |
| 7.12  | 1652.00 | 4.71  | 1.31 x  | debris a,b       |
| 0.87  | 2496.00 | 15.64 | 4.35 x  | debris a         |
| -0.52 | 4413.00 | 16.72 | 4.65 x  | debris a         |
| 5.56  | 2782.00 | 10.24 | 1.72 x  | debris a,b       |
| 2.69  | 1942.00 | 3.35  | -0.56 x | toxic b,c        |
| 2.37  | 997.00  | 3.49  | -0.59 x | toxic b,c        |
| 1.67  | 467.00  | 5.14  | 3.09 x  | toxic a,b,c      |
| 5.03  | 2354.00 | 4.87  | 2.92 x  | toxic b          |
| 1.68  | 2906.00 | 3.95  | 2.37 x  | debris a,b       |
| 2.07  | 2015.00 | 3.91  | 2.35 x  | debris a,b       |
| 5.27  | 1572.00 | 8.42  | 5.05 x  | toxic b,c        |
| 4.09  | 3194.00 | 9.16  | 5.50 x  | toxic b          |
| 2.09  | 1964.00 | 20.06 | 0.79 x  | toxic a,b,c      |
| 2.76  | 1220.00 | 21.84 | 0.57 x  | toxic a,b,c      |
| 3.77  | 1056.00 | 16.43 | 0.41 x  | toxic a,b,c      |
| 2.14  | 1143.00 | 13.22 | 0.70 x  | toxic a,b,c      |
| 2.54  | 1086.00 | 12.29 | 0.79 x  | toxic a,b,c      |
| 3.09  | 2968.00 | 12.47 | 0.22 X  | toxic b          |
| 3.03  | 1550.00 | 26.97 | 1.31 x  | toxic a,c        |
| 3.03  | 2015.00 | 20.70 | 0.84 x  | toxic a,b        |
| 2.60  | 3197.00 | 18.80 | 0.70 x  | toxic a          |
| 3.46  | 1660.00 | 20.90 | 0.85 x  | toxic a,b,c      |
| 2.56  | 1475.00 | 28.88 | 1.45 x  | toxic a,b,c      |
| 3.59  | 520.00  | 25.58 | 1.20 x  | toxic a,b,c      |
| 3.00  | 1382.00 | 27.42 | 1.34 x  | toxic a,c        |
| 3.26  | 1543.00 | 15.04 | 0.42 x  | toxic a,c        |
| 2.63  | 1556.00 | 19.60 | 0.76 X  | toxic a,c        |
| 4.60  | 549.00  | 30.24 | 1.55 x  | toxic a,b,c      |
| 3.44  | 816.00  | 28.31 | 1.41 x  | toxic a,b,c      |
| 2.05  | 2355.00 | 18.85 | 0.70 x  | toxic a,b        |
| 2.16  | 969.00  | 20.74 | 0.84 x  | toxic a,b        |
| 1.70  | 1692.00 | 12.00 | 3.02 x  | toxic a,b,c      |
| 2.39  | 1862.00 | 5.32  | 1.34 x  | toxic a,b,c      |
| 3.38  | 2532.00 | 16.37 | 4.12 X  | toxic b, art a,b |
| 2.32  | 648.00  | 1.90  | 0.48 x  | toxic a,b,c      |
| 2.09  | 2558.00 | 9.55  | 2.40 X  | toxic b          |
| 2.60  | 3109.00 | 4.73  | 1.19 x  | debris a         |
| 2.60  | 3375.00 | 1.30  | 0.33 X  | debris a,c       |
| 1.19  | 2822.00 | 9.08  | 2.28 X  | toxic a          |

|      |         |       |        |                    |
|------|---------|-------|--------|--------------------|
| 2.95 | 2594.00 | 10.03 | 2.52 X | debris b,c         |
| 3.47 | 1203.00 | 18.19 | 4.58 x | toxic a,b,c        |
| 2.23 | 2564.00 | 13.44 | 3.38 X | toxic a,debris c,a |
| 1.82 | 1842.00 | 11.12 | 2.80 x | debris a,b,tox c   |
| 1.84 | 2646.00 | 10.98 | 2.76 X | toxic a            |
| 0.51 | 3663.00 | 12.46 | 3.14 X | debris c           |
| 3.19 | 1668.00 | 14.03 | 3.53 X | debris c           |
| 3.21 | 2263.00 | 13.83 | 3.48 X | debris c           |
| 2.12 | 1506.00 | 14.89 | 3.75 X | toxic c            |
| 2.57 | 1305.00 | 14.01 | 3.53 X | toxic b,c          |
| 0.59 | 4361.00 | 11.45 | 2.23 x | art a              |
| 2.51 | 2004.00 | 9.47  | 1.85 x | toxic a,b          |
| 1.42 | 2000.00 | 15.11 | 2.95 x | toxic a,b          |
| 2.43 | 1467.00 | 6.16  | 1.20 x | toxic a,b,c        |
| 0.97 | 4367.00 | 10.91 | 2.13 x | toxic a            |
| 4.93 | 786.00  | 7.64  | 1.49 x | toxic a,b,c        |
| 2.45 | 4989.00 | 9.05  | 1.77 X | debris a,b         |
| 1.04 | 3991.00 | 11.59 | 2.26 X | debris a,c         |
| 2.73 | 4053.00 | 15.26 | 2.98 X | debris a,c         |
| 1.81 | 3153.00 | 12.73 | 2.49 X | debris a,c         |
| 1.49 | 2461.00 | 11.87 | 2.32 X | debris a,c         |
| 1.48 | 3091.00 | 12.37 | 2.42 X | debris a,c         |
| 0.92 | 3287.00 | 17.38 | 3.39 X | debris a,c         |
| 0.98 | 2335.00 | 11.78 | 2.47 X | debris a,b         |
| 3.35 | 4646.00 | 8.87  | 1.86 X | debris a,b         |
| 2.34 | 4989.00 | 8.72  | 1.82 X | debris a,b         |
| 2.66 | 3738.00 | 12.81 | 2.68 X | debris a,b         |
| 1.23 | 4313.00 | 12.57 | 2.63   | debris a,b         |
| 2.45 | 3702.00 | 12.05 | 2.52 X | debris a,b         |
| 2.55 | 1236.00 | 17.73 | 3.71 x | toxic a,b,c        |
| 2.11 | 2419.00 | 13.09 | 2.74   | debris a,b         |
| 1.26 | 2159.00 | 14.11 | 2.95 X | toxic a            |
| 4.29 | 2561.00 | 16.57 | 3.47 X | debris a,b         |
| 2.48 | 1463.00 | 9.07  | 2.19 x | toxic b,c          |
| 1.78 | 3232.00 | 11.96 | 2.89 X | debris a,c         |
| 0.99 | 2879.00 | 13.17 | 3.18 x | debris a,c         |
| 1.34 | 3039.00 | 15.18 | 3.67 x | debris a,c         |
| 2.96 | 2608.00 | 8.19  | 1.98 X | debris a,c         |
| 4.20 | 2836.00 | 6.29  | 1.52 x | toxic b            |
| 1.88 | 3198.00 | 10.10 | 2.44 X | debris a,c         |
| 3.43 | 4257.00 | 6.28  | 1.52 X | debris a,c         |
| 2.65 | 2081.00 | 1.65  | 0.40 x | toxic ab           |
| 3.89 | 1095.00 | 1.26  | 0.30 x | toxic a,b,c        |
| 2.23 | 2861.00 | 9.86  | 1.84 x | debris a,b         |
| 2.24 | 5321.00 | 15.64 | 2.92 x | debris b           |
| 0.94 | 3102.00 | 12.04 | 2.01 x | debris a           |
| 4.42 | 4418.00 | 0.46  | 0.10 x | debris a           |

|       |         |       |         |             |
|-------|---------|-------|---------|-------------|
| 2.80  | 3298.00 | 4.31  | -0.92 x | debris a    |
| 0.62  | 3187.00 | 10.00 | 2.03 x  | debris c    |
| 4.84  | 1214.00 | 0.63  | -0.17 x | toxic a,b,c |
| 3.66  | 729.00  | 6.48  | 1.71 x  | toxic a,b,c |
| 4.52  | 655.00  | 1.12  | -0.30 x | toxic a,b,c |
| 3.69  | 711.00  | 3.73  | 0.99 x  | toxic a,b,c |
| 3.85  | 516.00  | 11.03 | 2.92 x  | toxic a,b,c |
| 5.45  | 634.00  | 10.44 | 2.77 x  | toxic a,b,c |
| 2.04  | 875.00  | 6.22  | 1.65 x  | toxic a,b,c |
| 4.40  | 431.00  | 3.05  | -0.60 x | toxic a,b,c |
| 5.99  | 200.00  | 18.31 | 3.62 x  | toxic a,b,c |
| 3.50  | 1598.00 | 9.46  | 1.87 x  | toxic b,c   |
| -0.15 | 782.00  | 20.83 | 4.12 x  | toxic a,b,c |
| 0.17  | 300.00  | 14.64 | 2.90 x  | toxic a,b,c |
| 0.57  | 332.00  | 12.79 | 3.56 x  | toxic a,b,c |
| 2.65  | 339.00  | 1.19  | 0.33 x  | toxic a,b,c |
| 1.59  | 569.00  | 10.81 | 3.01 x  | toxic a,b,c |
| 4.41  | 303.00  | 9.95  | 2.77 x  | toxic a,b,c |
| 2.68  | 230.00  | 17.15 | 4.77 x  | toxic a,b,c |
| 1.82  | 385.00  | 12.03 | 3.35 x  | toxic a,b,c |
| 0.82  | 805.00  | 7.53  | 2.09 x  | toxic a,b,c |
| 0.91  | 1996.00 | 14.75 | 4.10 x  | toxic a,b,c |
| 3.80  | 904.00  | 7.38  | 2.05 x  | toxic a,b,c |
| 2.18  | 449.00  | 8.75  | 2.11 x  | toxic a,b,c |
| 4.44  | 295.00  | 2.19  | 0.53 x  | toxic a,b,c |
| 2.18  | 489.00  | 0.69  | -0.17 x | toxic a,b,c |
| 2.36  | 1303.00 | 3.74  | 0.90 x  | toxic b,c   |
| 3.48  | 1368.00 | 0.98  | 0.24 x  | toxic a,b,c |
| 3.13  | 581.00  | 11.28 | 2.72 x  | toxic a,b,c |
| -0.19 | 461.00  | 10.08 | 2.43 x  | toxic b,c   |
| 2.98  | 893.00  | 8.72  | 2.10 x  | toxic a,b,c |
| 2.93  | 1897.00 | 11.15 | 2.69 x  | toxic b,c   |
| 3.40  | 2017.00 | 0.77  | 0.18 x  | toxic a,b   |
| 8.11  | 187.00  | 20.21 | 6.83 x  | toxic a,b,c |
| 3.88  | 274.00  | 8.95  | 3.02 x  | toxic a,b,c |
| 3.87  | 202.00  | 8.45  | 2.85 x  | toxic a,b,c |
| -0.08 | 147.00  | 10.05 | 3.39 x  | toxic a,b,c |
| 2.78  | 556.00  | 0.60  | -0.20 x | toxic a,b,c |
| 2.62  | 2223.00 | 6.96  | 2.35 x  | toxic a,b   |
| 0.56  | 440.00  | 13.26 | 4.48 x  | toxic a,b,c |
| 6.08  | 738.00  | 7.28  | 2.46 x  | toxic a,b,c |
| 4.61  | 1068.00 | 13.25 | 4.48 x  | toxic a,b,c |
| -0.86 | 1678.00 | 6.64  | 2.24 x  | toxic b,c   |
| 1.03  | 771.00  | 8.31  | 2.81 x  | toxic a,b,c |
| 3.45  | 378.00  | 6.99  | 2.36 x  | toxic a,b,c |

screened were eliminated for toxicity.

**Table S3. IFN-Enhancement scores for known dependency factors**

| <u>Li et al Dependency Factor</u> | <u>Dharmacon ad</u> | <u>plt A robust Z</u> | <u>plt B robust Z</u> | <u>plt C robust Z</u> | <u>mean robust Z</u> |
|-----------------------------------|---------------------|-----------------------|-----------------------|-----------------------|----------------------|
| ADAMTS4                           | 12, K13             | 0.10                  | 1.38                  | 2.53                  | 1.34                 |
| ALAD                              | 20, B15             | -1.07                 | -0.45                 | -0.03                 | -0.51                |
| AP1GBP1                           | 20, H15             | 0.92                  | 0.42                  | 0.57                  | 0.64                 |
| AP3B1                             | 19, B17             | -0.85                 | 0.19                  | -0.64                 | -0.43                |
| APLP2                             | 8, M13              | -0.39                 | 0.97                  | 0.61                  | 0.40                 |
| ARHGAP22                          | 63, B21             | -0.74                 | -1.43                 | -1.23                 | -1.13                |
| ARHGEF10L                         | 60, J15             | 0.84                  | -0.64                 | -0.40                 | -0.07                |
| ARRDC2                            | 57, M17             | 0.01                  | -0.54                 | 1.41                  | 0.30                 |
| BAGE2                             | 68, H12             | -1.10                 | -1.50                 | -0.36                 | -0.99                |
| BCKDHA                            | 10, A4              | -1.33                 | 0.18                  | -1.02                 | -0.72                |
| BRF1                              | 8, A4               | -1.18                 | -0.76                 | 0.05                  | -0.63                |
| BRUNOL6                           | 63, P9              | 0.25                  | -0.04                 | -0.13                 | 0.03                 |
| C10orf112                         | 79, B8              | -0.80                 | -1.40                 | -1.33                 | -1.18                |
| C14orf73                          | 70, B11             | -0.53                 | 0.00                  | -1.54                 | -0.69                |
| C19orf44                          | 67, H17             | -0.33                 | -0.47                 | -1.00                 | -0.60                |
| C20orf20                          | 60, H18             | -0.91                 | -0.88                 | -0.38                 | -0.73                |
| C21orf56                          | 67, N7              | -0.55                 | -1.31                 | -0.92                 | -0.93                |
| CAMTA2                            | 21, H19             | -1.06                 | -0.37                 | 0.14                  | -0.43                |
| CASP4                             | 12, I18             | 7.16                  | 1.29                  | -0.61                 | 2.61                 |
| CCDC8                             | 67, E12             | 1.26                  | -0.44                 | 0.93                  | 0.58                 |
| CCNB2                             | 21, L17             | -0.62                 | -0.37                 | 1.24                  | 0.08                 |
| CCPG1                             | 21, M10             | -0.13                 | -0.10                 | 0.83                  | 0.20                 |
| CDC6                              | 6, O4               | -0.44                 | -0.35                 | 0.31                  | -0.16                |
| CDH1                              | 6, O2               | -0.02                 | 0.73                  | 0.92                  | 0.54                 |
| CDKL5                             | 1, A16              | 0.08                  | 1.82                  | 0.45                  | 0.78                 |
| CHKA                              | 1, A17              | 0.29                  | 1.05                  | 2.16                  | 1.17                 |
| CHUK                              | 1, A23              | -0.58                 | 0.21                  | -1.04                 | -0.47                |
| CISH                              | 21, K23             | -1.12                 | -0.90                 | -0.55                 | -0.86                |
| CLDN1                             | 18, H12             | -0.40                 | -1.02                 | -1.23                 | -0.88                |
| CLSTN1                            | 21, O7              | -0.15                 | 0.77                  | -0.46                 | 0.05                 |
| CNOT1                             | 55, E5              | 0.24                  | 0.23                  | -0.43                 | 0.01                 |
| CNOT2                             | 19, A16             | -0.13                 | 0.52                  | -1.25                 | -0.29                |
| CNOT3                             | 8, F5               | 0.55                  | -0.30                 | -0.31                 | -0.02                |
| CNOT6L                            | 21, O21             | 0.24                  | 0.80                  | -0.76                 | 0.10                 |
| CSNK1A1L                          | 2, G16              | -0.51                 | -0.31                 | -0.10                 | -0.31                |
| CTAGE6                            | 79, B6              | -1.36                 | -1.62                 | -1.17                 | -1.38                |
| CTGF                              | 6, C14              | 1.09                  | 1.05                  | 1.75                  | 1.29                 |
| CTSF                              | 10, L9              | -0.75                 | -0.70                 | -0.41                 | -0.62                |
| CX3CL1                            | 17, O5              | -1.17                 | 0.38                  | -0.24                 | -0.34                |
| CYBA                              | 76, I4              | -0.81                 | -0.13                 | 1.55                  | 0.20                 |
| CYP4A22                           | 81, F15             |                       |                       |                       | #DIV/0!              |
| DACT3                             | 73, L21             | -0.29                 | -0.21                 | 0.17                  | -0.11                |
| DBNDD1                            | 64, P17             | -0.60                 | 0.15                  | -0.56                 | -0.34                |



|           |         |       |       |       |         |
|-----------|---------|-------|-------|-------|---------|
| DDX3X     | 47,J18  | -0.14 | -0.69 | 1.79  | 0.32    |
| DEFA5     | 47,H20  | -0.33 | 0.03  | 0.13  | -0.06   |
| DEFB126   | 66,L4   | -0.78 | 0.29  | 0.47  | -0.01   |
| DGAT1     | 10,P21  | -0.44 | -0.07 | 0.45  | -0.02   |
| DHRS12    | 65,B7   | -0.15 | -0.24 | 0.81  | 0.14    |
| DIO3      | 47,H6   | -0.61 | -0.70 | -1.19 | -0.83   |
| DLGAP4    | 54,L12  | -0.67 | -0.89 | -0.32 | -0.63   |
| DNAJB1    | 59,K21  | 1.01  | 0.54  | 0.32  | 0.62    |
| DOCK3     | 21,N16  | 0.09  | -0.82 | 0.07  | -0.22   |
| E2F2      | 21,L14  | 0.71  | 0.70  | 0.11  | 0.51    |
| ERC2      | 21,J11  | 2.22  | 1.09  | 0.45  | 1.25    |
| ERCC5     | 12,D18  | 0.46  | 1.75  | 0.25  | 0.82    |
| ETF1      | 19,c6   | -0.23 | 0.65  | -0.74 | -0.11   |
| EWSR1     | 6,H9    | -0.64 | 0.37  | -0.81 | -0.36   |
| FAU       | 19, O8  | 2.61  | 0.45  | 1.16  | 1.41    |
| FBLN5     | 21,B6   | -0.86 | -1.15 | -0.67 | -0.89   |
| FBXO38    | 66, N23 | -0.06 | -1.37 | -1.13 | -0.85   |
| FCGRT     | 17, F12 | 0.62  | -0.69 | -1.00 | -0.36   |
| FER1L3    | 57, A11 | -0.43 | -0.46 | -0.63 | -0.51   |
| FLJ22659  | 66, A5  | -0.42 | -0.47 | -1.40 | -0.76   |
| FLT4      | 1, J14  | 0.29  | -0.53 | 1.98  | 0.58    |
| FOXA2     | 8,P12   | -0.53 | 0.14  | -0.53 | -0.31   |
| FRMPD3    | 68,C7   | 0.18  | -0.73 | -1.11 | -0.55   |
| GNB2L1    | 22,O4   | -0.42 | -0.24 | -0.90 | -0.52   |
| GNG8      | 69,B15  | -1.39 | -1.20 | -0.83 | -1.14   |
| GPSN2     | 52,B15  | -1.47 | -1.14 | -0.47 | -1.03   |
| GTF3A     | 8,H2    | 0.13  | 2.07  | -0.70 | 0.50    |
| GUCY1A2   | 11,E23  | -0.59 | 1.40  | -0.90 | -0.03   |
| HCCS      | 48,G18  | 0.06  | 0.45  | 1.47  | 0.66    |
| HEATR1    | 60,D21  | -0.85 | -1.09 | -0.34 | -0.76   |
| HIPK3     | 1,B20   | -0.65 | -0.25 | 0.06  | -0.28   |
| HRC       | 23,G7   | -0.66 | -0.02 | -0.06 | -0.25   |
| HSD17B13  | 79,P12  | 0.22  | 0.08  | 1.81  | 0.70    |
| HSPA1A    | 23,G21  | -0.13 | -1.00 | -1.08 | -0.74   |
| IFITM3    | 23,M23  | -1.14 | -1.38 | 0.70  | -0.61   |
| IGSF11    | 74,I18  | -0.35 | 0.71  | -1.16 | -0.27   |
| ILVBL     | 54,I14  | -0.38 | 1.04  | 1.90  | 0.85    |
| IMP4      | 70,P8   | -1.02 | -1.18 | -1.76 | -1.32   |
| IRF3      | 9,G13   | -0.01 | 1.89  | -0.05 | 0.61    |
| ITGA7     | 17,L7   | 0.69  | -0.81 | -0.30 | -0.14   |
| KCNJ3     | 4,B20   | -1.49 | -1.04 | -0.85 | -1.13   |
| KCNK3     | 19,N9   | 0.31  | 0.89  | 0.44  | 0.55    |
| KIAA1166  | 61,L10  | 1.13  | 2.24  | 0.67  | 1.35    |
| KRT4      | 19,E5   | 1.39  | 0.21  | 2.08  | 1.23    |
| L1TD1     | 59,L7   | -0.28 | -0.77 | 0.07  | -0.33   |
| LOC285556 | 78,J19  | -1.07 | -0.87 | 0.88  | -0.35   |
| LOC285643 | 81,A4   |       |       |       | #DIV/0! |

|            |        |       |       |       |       |
|------------|--------|-------|-------|-------|-------|
| LOC400451  | 80,D16 | 1.59  | 2.09  | 0.06  | 1.24  |
| LTC4S      | 22,F16 | -0.99 | -0.30 | -1.31 | -0.87 |
| MAP4       | 48,J18 | 0.61  | -0.67 | -0.90 | -0.32 |
| MAPK1      | 2,M18  | 1.38  | -0.84 | 0.43  | 0.33  |
| MARK3      | 2,I18  | 0.85  | 1.24  | -0.22 | 0.62  |
| MCHR2      | 4,H11  | 0.10  | -0.61 | -0.49 | -0.33 |
| MCM2       | 13,I19 | 1.20  | 0.83  | 0.70  | 0.91  |
| MED12      | 18,N18 | -1.32 | -1.07 | 2.60  | 0.07  |
| MGC13057   | 67,L6  | -0.96 | -1.23 | -1.26 | -1.15 |
| MLLT1      | 23,J20 | -1.33 | -0.49 | -0.37 | -0.73 |
| MLXIPL     | 8,E5   | -0.82 | -0.31 | -0.77 | -0.63 |
| MRPL15     | 57,J17 | 1.37  | -0.89 | -0.41 | 0.02  |
| MRPL38     | 64,B23 | -1.38 | 0.31  | -0.65 | -0.57 |
| MRPL48     | 59,E21 | 0.38  | 0.29  | 0.29  | 0.32  |
| MTHFSD     | 64,I16 | -0.67 | -1.31 | -0.69 | -0.89 |
| MYCL2      | 9,K18  | -0.84 | 0.80  | 0.46  | 0.14  |
| MYO3A      | 2,C6   | -0.55 | -1.11 | -0.69 | -0.78 |
| MYO7B      | 49,C23 | -0.90 | -1.17 | 0.86  | -0.40 |
| NAALADL1   | 53,O4  | -0.57 | -0.88 | -0.59 | -0.68 |
| NMT1       | 49,O7  | -0.04 | -0.76 | -0.02 | -0.27 |
| NOC4L      | 64,L20 | 0.46  | 0.24  | -0.59 | 0.04  |
| NOL1       | 23,M6  | -0.78 | -0.69 | -0.81 | -0.76 |
| NOL5A      | 53,L8  | -0.92 | -1.04 | -0.25 | -0.74 |
| NOL6       | 64,F7  | -0.83 | -0.61 | -0.84 | -0.76 |
| NOP5/NOP58 | 59,C7  | -0.96 | -0.95 | -1.08 | -1.00 |
| NOS1AP     | 14,D23 | -0.10 | 0.98  | -0.99 | -0.03 |
| NUAK2      | 3,G21  | -0.42 | -0.58 | 0.00  | -0.33 |
| ORAOV1     | 76,G14 | -1.13 | -0.93 | -0.57 | -0.88 |
| OSBP       | 7,O4   | 0.64  | 0.75  | 1.08  | 0.83  |
| PARP11     | 62,B13 | 0.47  | -0.06 | 0.36  | 0.25  |
| PECR       | 11,H11 | -0.01 | -0.41 | -0.25 | -0.22 |
| PEMT       | 53,J11 | -0.54 | -0.72 | -0.72 | -0.66 |
| PGLYRP4    | 62,D5  | -0.33 | -0.45 | -0.15 | -0.31 |
| PI4KA      | 2,P11  | -0.64 | 0.04  | -0.97 | -0.52 |
| PNO1       | 62,O16 | -1.03 | -1.43 | -1.43 | -1.30 |
| POLR2J2    | 76,J16 | -0.51 | -0.62 | -0.99 | -0.71 |
| PPIA       | 49,B21 | -0.78 | -1.02 | -0.66 | -0.82 |
| PPP2R1A    | 16,E9  | -0.38 | -0.56 | -0.74 | -0.56 |
| PPTC7      | 16,M23 | 0.95  | 0.39  | 0.16  | 0.50  |
| PRKRIP1    | 65,G18 | -0.37 | 0.31  | -0.52 | -0.19 |
| PROX1      | 23,P18 | -0.11 | 0.74  | 2.86  | 1.16  |
| PRPF40A    | 61,G8  | 0.77  | -0.65 | -0.48 | -0.12 |
| PRPSAP2    | 2,F2   | -1.17 | -0.38 | -1.08 | -0.87 |
| PSME1      | 14,L19 | 0.27  | 0.13  | 0.10  | 0.17  |
| PTCD1      | 56,L5  | -0.78 | -0.36 | -1.12 | -0.75 |
| PTHR1      | 5,I10  | 0.84  | 1.01  | 0.64  | 0.83  |
| RAB10      | 24,H21 | -1.18 | -0.37 | -0.22 | -0.59 |

|          |        |       |       |       |         |
|----------|--------|-------|-------|-------|---------|
| RAB11A   | 14,A13 | -0.67 | -0.53 | 1.06  | -0.05   |
| RABEPK   | 24,J21 | -0.47 | 1.15  | -0.58 | 0.03    |
| RAC1     | 2,B8   | -0.97 | 0.28  | -1.65 | -0.78   |
| RBM22    | 61,C2  | -1.09 | -0.13 | -0.47 | -0.56   |
| RBM9     | 55,B10 | -1.43 | -0.15 | -0.37 | -0.65   |
| Rgr      | 5,G18  | 1.52  | -0.24 | 0.79  | 0.69    |
| RIPK2    | 3,A19  | 0.16  | -0.26 | -0.71 | -0.27   |
| RNF207   | 80,J17 | 0.92  | -0.19 | 1.50  | 0.74    |
| RNF31    | 15,D7  | -1.01 | -0.86 | -1.30 | -1.06   |
| ROCK2    | 3,C7   | -1.24 | -0.49 | -0.38 | -0.70   |
| RPS6KL1  | 3,E15  | -0.48 | -0.28 | -0.76 | -0.51   |
| SH3TC1   | 59,E12 | -0.79 | 0.36  | -0.27 | -0.23   |
| SLC11A1  | 19,N6  | -0.23 | 0.48  | -0.69 | -0.15   |
| SLC6A8   | 19,H4  | 5.55  | 7.16  | 2.56  | 5.09    |
| SMAD5    | 18,J18 | -0.99 | 0.60  | 0.39  | 0.00    |
| SMAD6    | 17,P2  | -0.71 | -0.66 | -0.86 | -0.74   |
| SMARCD3  | 9,N9   | 0.57  | -0.69 | 0.42  | 0.10    |
| SMURF1   | 15,F9  | -1.17 | 1.14  | 0.70  | 0.23    |
| SMURF2   | 15,F11 | -0.05 | 1.59  | -0.07 | 0.49    |
| SPDEF    | 9,P23  | 7.51  | -1.44 | 0.62  | 2.23    |
| SRFBP1   | 74,C18 | -1.93 | -0.81 | -0.43 | -1.06   |
| STMN2    | 24,B11 | -1.00 | -0.52 | -0.83 | -0.79   |
| STX2     | 19,H11 | 1.96  | 1.87  | 1.58  | 1.80    |
| SURF1    | 11,H2  | 2.48  | 0.71  | 1.70  | 1.63    |
| SUV420H1 | 58,I20 | -0.14 | -0.61 | -0.41 | -0.38   |
| SUZ12    | 6,F20  | -0.39 | -0.27 | -1.08 | -0.58   |
| TCOF1    | 19,F12 | -0.81 | -0.76 | 0.36  | -0.41   |
| TFAP2A   | 9,F8   | -1.03 | -0.05 | -0.41 | -0.50   |
| TM6SF2   | 89,M12 |       |       |       | #DIV/0! |
| TMEM142A | 68,D9  | 0.09  | 0.15  | -0.18 | 0.02    |
| TOP1     | 12,B19 | -0.51 | -0.85 | -0.64 | -0.66   |
| TPM4     | 19,E10 | 1.48  | 1.19  | 2.24  | 1.64    |
| TRAPPC5  | 71,P12 | -0.91 | -0.35 | -1.56 | -0.94   |
| TRIM42   | 79,A15 | -0.44 | 0.76  | -0.51 | -0.06   |
| TRIM62   | 60,N6  | 0.67  | -1.08 | -0.95 | -0.46   |
| TRRAP    | 11,D12 | -0.69 | -0.97 | 0.90  | -0.25   |
| TTY5     | 7,M14  | 0.77  | 0.91  | 0.86  | 0.85    |
| TWIST1   | 8,G2   | -0.41 | -0.30 | -0.85 | -0.52   |
| UBA52    | 19,K7  | 1.03  | 0.91  | 0.01  | 0.65    |
| USP11    | 15,C13 | -0.90 | -0.56 | -1.33 | -0.93   |
| USP42    | 15,I5  | -0.39 | -0.93 | 0.14  | -0.39   |
| USP51    | 74,J16 | -2.14 | -2.04 | -1.24 | -1.81   |
| VAMP1    | 50,F8  | -0.07 | 1.14  | 0.31  | 0.46    |
| WDR37    | 54,F20 | 0.18  | -0.06 | -0.64 | -0.17   |
| WDR43    | 55,K6  | -0.53 | -0.15 | -0.47 | -0.39   |
| WIF1     | 3,E16  | -0.10 | -1.16 | -0.78 | -0.68   |
| WWTR1    | 56,B19 | -0.81 | -0.10 | 0.69  | -0.08   |

|         |        |       |       |       |       |
|---------|--------|-------|-------|-------|-------|
| XBP1    | 24,N10 | 2.40  | -0.13 | 2.08  | 1.45  |
| XPNPEP1 | 12,G9  | -0.10 | -0.18 | 0.40  | 0.04  |
| ZEB1    | 9,F20  | 0.02  | -1.02 | -0.80 | -0.60 |
| ZNF148  | 10,E23 | -0.07 | -0.34 | -1.11 | -0.51 |
| ZNF346  | 56,C9  | -1.23 | -0.36 | -0.35 | -0.64 |
| ZNF467  | 75,G12 | 0.02  | -0.97 | -1.17 | -0.71 |
| ZNF608  | 62,F14 | -0.54 | -0.80 | -1.49 | -0.94 |
| ZNF767  | 65,D14 | -1.06 | -0.12 | -0.12 | -0.43 |
| ZNRF2   | 76,P2  | 0.08  | -1.35 | 0.41  | -0.29 |

ors from Li, Brass et al 2009

## Table S4 Top 120 HCV IEGs

|                  |                                                                          |
|------------------|--------------------------------------------------------------------------|
| <b>ACSL6</b>     | acyl-CoA synthetase long-chain family member 6                           |
| <b>ACTN2</b>     | actinin, alpha 2                                                         |
| <b>ADAM30</b>    | ADAM metallopeptidase domain 30                                          |
| <b>AKAP8L</b>    | A kinase (PRKA) anchor protein 8-like                                    |
| <b>ALG10</b>     | asparagine-linked glycosylation 10 homolog (yeast, alpha-1,2-glucosyltra |
| <b>ANKFY1</b>    | ankyrin repeat and FYVE domain containing 1                              |
| <b>APC2</b>      | adenomatosis polyposis coli 2                                            |
| <b>ASCL1</b>     | achaete-scute complex homolog 1 (Drosophila)                             |
| <b>ASPA</b>      | aspartoacylase (Canavan disease)                                         |
| <b>BCHE</b>      | butyrylcholinesterase                                                    |
| <b>C14ORF100</b> | chromosome 14 open reading frame 100                                     |
| <b>CAPN6</b>     | calpain 6                                                                |
| <b>CCL26</b>     | chemokine (C-C motif) ligand 26                                          |
| <b>CCRL1</b>     | chemokine (C-C motif) receptor-like 1                                    |
| <b>CDX2</b>      | caudal type homeobox transcription factor 2                              |
| <b>CPA6</b>      | carboxypeptidase A6                                                      |
| <b>CSF2</b>      | colony stimulating factor 2 (granulocyte-macrophage)                     |
| <b>DCT</b>       | dopachrome tautomerase (dopachrome delta-isomerase, tyrosine-relatec     |
| <b>DHX9</b>      | DEAH (Asp-Glu-Ala-His) box polypeptide 9                                 |
| <b>DMRT1</b>     | doublesex and mab-3 related transcription factor 1                       |
| <b>DPP4</b>      | dipeptidyl-peptidase 4 (CD26, adenosine deaminase complexing protein :   |
| <b>DR1</b>       | down-regulator of transcription 1, TBP-binding (negative cofactor 2)     |
| <b>EDEM3</b>     | ER degradation enhancer, mannosidase alpha-like 3                        |
| <b>EIF3S3</b>    | eukaryotic translation initiation factor 3, subunit 3 gamma, 40kDa       |
| <b>EIF4E</b>     | eukaryotic translation initiation factor 4E                              |
| <b>ENTPD3</b>    | ectonucleoside triphosphate diphosphohydrolase 3                         |
| <b>EPO</b>       | erythropoietin                                                           |
| <b>ETV3</b>      | ets variant gene 3                                                       |
| <b>FANCG</b>     | Fanconi anemia, complementation group G                                  |
| <b>FFAR2</b>     | free fatty acid receptor 2                                               |
| <b>FLJ25168</b>  | (C17orf69)                                                               |
| <b>FLJ45235</b>  | (ANKRD45) ankyrin repeat domain-containing protein 45                    |
| <b>FN1</b>       | fibronectin 1                                                            |
| <b>FOXI1</b>     | forkhead box I1                                                          |
| <b>GCKR</b>      | glucokinase (hexokinase 4) regulator                                     |
| <b>GCM1</b>      | glial cells missing homolog 1 (Drosophila)                               |
| <b>GJB4</b>      | gap junction protein, beta 4                                             |
| <b>GUCY1B3</b>   | guanylate cyclase 1, soluble, beta 3                                     |
| <b>GZMA</b>      | granzyme A (granzyme 1, cytotoxic T-lymphocyte-associated serine este    |
| <b>HDGF2</b>     | (HDGFRP2) hepatoma-derived growth factor-related protein 2               |
| <b>HEY2</b>      | hairy/enhancer-of-split related with YRPW motif 2                        |
| <b>HRH4</b>      | histamine receptor H4                                                    |
| <b>HSFY1</b>     | heat shock transcription factor, Y-linked 1                              |

|                      |                                                                             |
|----------------------|-----------------------------------------------------------------------------|
| <b>HSP90AA1</b>      | heat shock protein 90kDa alpha (cytosolic), class A member 1                |
| <b>HSP90AB1</b>      | heat shock protein 90kDa alpha (cytosolic), class B member 1                |
| <b>IFNAR1</b>        | interferon (alpha, beta and omega) receptor 1                               |
| <b>IFNAR2</b>        | interferon (alpha, beta and omega) receptor 2                               |
| <b>IFNGR1</b>        | interferon gamma receptor 1                                                 |
| <b>IQGAP2</b>        | IQ motif containing GTPase activating protein 2                             |
| <b>IRF7</b>          | interferon regulatory factor 7                                              |
| <b>ISGF3G / IRF9</b> | interferon-stimulated transcription factor 3, gamma 48kDa                   |
| <b>ITGB1</b>         | integrin, beta 1 (fibronectin receptor, beta polypeptide, antigen CD29 incl |
| <b>JAK1</b>          | Janus kinase 1 (a protein tyrosine kinase)                                  |
| <b>KCNIP3</b>        | Kv channel interacting protein 3, calsenilin                                |
| <b>KIAA1049</b>      | (TCF25) transcription factor 25 (basic helix-loop-helix)                    |
| <b>KIAA1919</b>      | sodium-dependent glucose transporter 1                                      |
| <b>KIAA1944</b>      | (TMEM132D) transmembrane protein 132D                                       |
| <b>LIPG</b>          | lipase, endothelial                                                         |
| <b>LOC113444</b>     | (C1orf212) chromosome 1 open reading frame 212                              |
| <b>LOC51315</b>      | (KRCC1) lysine-rich coiled-coil 1                                           |
| <b>MAP2K4</b>        | mitogen-activated protein kinase kinase 4                                   |
| <b>MAP7</b>          | microtubule-associated protein 7                                            |
| <b>MCM7</b>          | minichromosome maintenance complex component 7                              |
| <b>MLL5</b>          | myeloid/lymphoid or mixed-lineage leukemia 5 (trithorax homolog, Drosop     |
| <b>MYBL1</b>         | v-myb myeloblastosis viral oncogene homolog (avian)-like 1                  |
| <b>MYOT</b>          | myotilin                                                                    |
| <b>MYST1</b>         | MYST histone acetyltransferase 1                                            |
| <b>NBEA</b>          | neurobeachin                                                                |
| <b>NCAM2</b>         | neural cell adhesion molecule 2                                             |
| <b>NFATC2</b>        | nuclear factor of activated T-cells, cytoplasmic, calcineurin-dependent 2   |
| <b>NLRP14</b>        | NLR family, pyrin domain containing 14                                      |
| <b>OTC</b>           | ornithine carbamoyltransferase                                              |
| <b>OTOP1</b>         | otopetrin 1                                                                 |
| <b>OTUB1</b>         | OTU domain, ubiquitin aldehyde binding 1                                    |
| <b>PAFAH2</b>        | platelet-activating factor acetylhydrolase 2, 40kDa                         |
| <b>PAX5</b>          | paired box gene 5 (B-cell lineage specific activator)                       |
| <b>PCDHB12</b>       | protocadherin beta 12                                                       |
| <b>PCDHB14</b>       | protocadherin beta 14                                                       |
| <b>PDIA2</b>         | protein disulfide isomerase family A, member 2                              |
| <b>PEO1</b>          | progressive external ophthalmoplegia 1                                      |
| <b>PGD</b>           | phosphogluconate dehydrogenase                                              |
| <b>PLEKHA1</b>       | pleckstrin homology domain containing, family A (phosphoinositide bindin    |
| <b>POLS</b>          | polymerase (DNA directed) sigma                                             |
| <b>PPP3CB</b>        | protein phosphatase 3 (formerly 2B), catalytic subunit, beta isoform        |
| <b>PRDM5</b>         | PR domain containing 5                                                      |
| <b>PRIC285</b>       | peroxisomal proliferator-activated receptor A interacting complex 285       |

|                |                                                                                |
|----------------|--------------------------------------------------------------------------------|
| <b>RAB4B</b>   | RAB4B, member RAS oncogene family                                              |
| <b>RALA</b>    | v-ral simian leukemia viral oncogene homolog A (ras related)                   |
| <b>RANBP2</b>  | RAN binding protein 2                                                          |
| <b>RAPGEF1</b> | Rap guanine nucleotide exchange factor (GEF) 1                                 |
| <b>RASGRF1</b> | RAS (RAD and GEM)-like GTP-binding 1                                           |
| <b>REM1</b>    | RAS (RAD and GEM)-like GTP-binding 1                                           |
| <b>REV3L</b>   | REV3-like, catalytic subunit of DNA polymerase zeta (yeast)                    |
| <b>RGPD5</b>   | RANBP2-like and GRIP domain containing 5                                       |
| <b>RNF32</b>   | ring finger protein 32                                                         |
| <b>RNGTT</b>   | RNA guanylyltransferase and 5'-phosphatase                                     |
| <b>ROCK1</b>   | Rho-associated, coiled-coil containing protein kinase 1                        |
| <b>S100A8</b>  | S100 calcium binding protein A8                                                |
| <b>SCG5</b>    | secretogranin V (7B2 protein)                                                  |
| <b>SFRS11</b>  | splicing factor, arginine/serine-rich 11                                       |
| <b>SFRS15</b>  | splicing factor, arginine/serine-rich 15                                       |
| <b>SLC27A2</b> | solute carrier family 27 (fatty acid transporter), member 2                    |
| <b>SMAD3</b>   | SMAD family member 3                                                           |
| <b>SSX2IP</b>  | synovial sarcoma, X breakpoint 2 interacting protein                           |
| <b>ST14</b>    | suppression of tumorigenicity 14 (colon carcinoma)                             |
| <b>STAT2</b>   | signal transducer and activator of transcription 2, 113kDa                     |
| <b>SULT1E1</b> | sulfotransferase family 1E, estrogen-preferring, member 1                      |
| <b>TAFA5</b>   | (FAM19A5) family with sequence similarity 19 (chemokine (C-C motif)-lik        |
| <b>TAS2R5</b>  | taste receptor, type 2, member 5                                               |
| <b>TEAD3</b>   | TEA domain family member 3                                                     |
| <b>TFB2M</b>   | transcription factor B2, mitochondrial                                         |
| <b>TGFBR1</b>  | transforming growth factor, beta receptor I (activin A receptor type II-like I |
| <b>THNSL1</b>  | threonine synthase-like 1                                                      |
| <b>TM7SF3</b>  | transmembrane 7 superfamily member 3                                           |
| <b>TTC5</b>    | tetratricopeptide repeat domain 5                                              |
| <b>TYK2</b>    | tyrosine kinase 2                                                              |
| <b>UCHL3</b>   | ubiquitin carboxyl-terminal esterase L3 (ubiquitin thiolesterase)              |
| <b>ZBTB6</b>   | zinc finger and BTB domain containing 6                                        |
| <b>ZNF224</b>  | zinc finger protein 224                                                        |
| <b>ZNF469</b>  | zinc finger protein 469                                                        |

## **Percent of Hits Positive**

**Found in C,D, or E**



**ISG in Primary Human Hepatocytes**

no

no

no

no

no

[PMC2808168](#)

no

no

no

no

no

no

no

[PMC2947462](#)

no

**ISG in some cell type**

no

no

no

no

no

[PMC2808168](#)

no

no

no

no

no

no

no

[PMC2947462](#)

no

[PMC3409588](#)

no



[PMC2947462](#)

[PMC2947462](#)

no

[PMC2808168](#)

[PMC2947462](#)

[PMC2808168](#)

no

**ISG in Primary Human Hepatocytes**

8.33

[PMC2947462](#)

no

[PMC3409588](#)

no

no

no

no

[PMC3409588](#)

no

no

[PMC3409588](#)

[PMC2808168](#)

no

**ISG in some cell type**

11.67

**other identification as IFN $\alpha$  related gene**

no  
no  
no  
no  
no  
[PMC3409588](#)  
no  
no  
no  
[PMID:16628626](#)  
no  
no  
  
no  
no  
no  
  
no  
  
[PMID:21957149](#)  
  
no  
no  
no  
no  
no  
[PMID:2254439](#)  
no  
[PMC1472600](#)  
no  
no  
[PMC3409588](#)  
no  
no  
  
no  
  
no  
no  
no  
no  
no  
[PMID:15840100](#)  
no  
no  
no  
no

**related to HCV**

[PMC3390353](#)  
no  
no  
no  
no  
[PMC3409588](#)  
no  
[PMC3409588](#)  
[PMID:19486448](#)  
[PMC3388175](#)  
no  
no  
[PMID: 22739041](#)  
no  
no  
no  
  
no  
[PMID:18782589](#)  
[PMID: 17684232](#)  
no  
[PMC3007131](#)  
no  
[PMC3199473](#)  
no  
[PMC3281608](#)  
no  
  
no  
no  
no  
no  
no  
  
[PMID: 16820872](#)  
  
no  
no  
no  
no  
no  
  
no  
no  
no  
no

no  
no  
[PMC3261326](#)  
[PMC3156775](#)  
[PMID:14996348](#)  
[PMC3409588](#)  
no

[PMC3409588](#)

[PMC3261326](#)  
[PMID:22711689](#)  
[PMC3390613](#)  
[PMC3261326](#)

no  
no

[PMC3261326](#)  
[PMC3261326](#)

no  
[PMC3427032](#)

no  
no  
no  
no

[PMC2836033](#)

no  
no

[PMC3409588](#)

[PMID:22490666](#)

[PMC3261326](#)  
[PMC3156775](#)

[PMC3409588](#)

no

[PMC3409588](#)

[PMC3261326](#)  
[PMID:22711689](#)

[PMC3261326](#)

no  
no

[PMC3261326](#)  
[PMC3261326](#)

no

no  
no  
no  
no

no  
[PMID: 9850179](#)

no  
no  
no  
no

[PMID: 20676096](#)

no  
no

[PMC2808168](#)  
[PMC3348056](#)

[PMC2947462](#)

no  
no

[PMC3409588](#)

no  
no  
no  
no

[PMC3409588](#)

no  
no

[PMC3261326](#)

no  
no  
no  
no  
no  
no

no  
no  
no

[PMC3261326](#)

no  
no  
no  
no

**other identification as IFN- $\alpha$  related gene**  
20.83

23.33

no

[PMC2668029](#)

no  
no  
no  
no  
no  
no  
no  
no  
no

[PMC3409588](#)

no  
no  
no  
no

no  
no

[PMC3261326](#)

[PMC2701521](#)

no  
no  
no  
no

[PMC2597299](#)

no  
no  
no

[PMC3261326](#)

no  
no  
no  
no

**related to HCV**  
22.50

**related to a non-HCV virus**

**other**

[PMID: 16448567](#)

no

[PMC2723137](#)

no

no

[PMC2780751](#)

no

[PMC3170792](#)

no

no

no

[PMC2211551](#)

no

[PMC3071656](#)

no

[PMID:20124101](#)

[PMID: 22661216](#)

no

no

[PMC2967539](#)

no

[PMC3312915](#)

no

no

[PMC1472600](#)

no

[PMC3233135](#)

no

no

[PMID: 16820872](#)

[PMID 19701604](#)

no

[PMID 17454446](#)

no

no

[PMC2803336](#)

no

no

no

no

[PMC1175008](#)

[PMC3281001](#)

[PMID:22226123](#)

[PMC2810293](#)

[PMID:14578863](#)

[PMID:18025162](#)

[PMID:15299030](#)

[PMC2430169](#)

[PMID:21614010](#)

no

[PMC2988069](#)

[PMC3347391](#)

no

no

no

no

no

no

no

[PMC303354](#)

no

[PMID:16703398](#)

[PMID:22784096](#)

[PMID: 21908553](#)

no

no

no

no

no

no

[PMID:14567964](#)

[PMC2836033](#)

no

[PMC2045388](#)

[PMID: 22457049](#)

no

no

[PMID:16507315](#)

no

no

no

[PMC3145673](#)



no [PMC2839122, HCC](#)

[PMC3407688](#)

no

no

no

no

no

no

[PMID: 12408826](#)

no

[PMC2884103](#)

[PMC3027118](#)

[PMC2255568](#)

[PMC1091719](#)

[PMC3334515](#)

[PMC3351729](#)

[PMID: 22088470](#)

no

no

no

no

[PMC3037883](#)

[PMC3292548](#)

[PMC3127837](#)

no

no

[PMC374249](#)

no

no

no

**related to a non-HCV virus**

25.83

**Search method:**

1. if had any (>1%) effect on HCV infection levels in Schoggins screen, inserted this
2. if detected as a hit in Barten or Zhao screens, inserted this
3. HCV + IFN: searched pubmed for articles using terms " gene + virus" and "gene + IFN"

**How we defined "IFN alpha ISG in Primary Hepatocytes":**

identified in Lanford microarray Hepatology 2006; 43(5): 961-972 chimpanzee liver biopsies with fold-change >:  
identified in Sarasin-Filipowicz microarray PNAS 2008; 105(19): 7034-9 human liver biopsies 4h fold-change >2 i

2 at 4h, >4 at 8h, in liver  
in liver from rapid responders

| <b>Canonical Pathway</b>                                     | <b>p-value</b> | <b>Ratio</b> |
|--------------------------------------------------------------|----------------|--------------|
| Interferon Signaling                                         | 1.88E-09       | 7/36(0.194)  |
| Role of JAK1, JAK2 and TYK2 in IFN Signaling                 | 8.08E-09       | 6/27(0.222)  |
| Glucocorticoid Receptor Signaling                            | 4.56E-05       | 9/294(0.031) |
| Activation of IRF by Cytosolic Pattern Recognition Receptors | 4.75E-05       | 5/72(0.069)  |
| <b>Top Tox Lists</b>                                         |                |              |
| PPARa/RXRa Activation                                        | 9.11E-04       | 6/172(0.035) |

Table S5.

## Table S6 Comparison of our HCV IEGs to Primary Hep

| Lanford ISGs | Our IEGs  |                                               |
|--------------|-----------|-----------------------------------------------|
| ABCB4        | ACSL6     |                                               |
| ABLIM3       | ACTN2     |                                               |
| ADFP         | ADAM30    | <b>reference:</b>                             |
| APOL3        | AKAP8L    | Lanford RE, Guerra B, Lee H, Chavez D, Brasky |
| ARG2         | ALG10     | Hepatology. 2006 May;43(5):961-72.            |
| ARNTL        | ANKFY1    |                                               |
| BAZ1A        | APC2      |                                               |
| BAZ2A        | ASCL1     |                                               |
| BLZF1        | ASPA      |                                               |
| C10ORF18     | BCHE      |                                               |
| CASP7        | C14ORF100 |                                               |
| CCL2         | CAPN6     |                                               |
| CCND3        | CCL26     |                                               |
| CPT1A        | CCRL1     |                                               |
| CRP          | CDX2      |                                               |
| CTCFL        | CPA6      |                                               |
| CXCL11       | CSF2      |                                               |
| DDX3X        | DCT       |                                               |
| DLL1         | DHX9      |                                               |
| EIF2C2       | DMRT1     |                                               |
| ELF1         | DPP4      |                                               |
| FAM46C       | DR1       |                                               |
| FLJ39370     | EDEM3     |                                               |
| FLJ39739     | EIF3S3    |                                               |
| G6PC         | EIF4E     |                                               |
| GJA4         | ENTPD3    |                                               |
| GLRX         | EPO       |                                               |
| GMPR         | ETV3      |                                               |
| IFI27        | FANCG     |                                               |
| IL15RA       | FFAR2     |                                               |
| IL28RA       | FLJ25168  |                                               |
| IRS2         | FLJ45235  |                                               |
| JUNB         | FN1       |                                               |
| KIAA1217     | FOXI1     |                                               |
| KIAA1971     | GCKR      |                                               |
| LEPR         | GCM1      |                                               |
| LOC441168    | GJB4      |                                               |
| LRG1         | GUCY1B3   |                                               |
| MAB21L2      | GZMA      |                                               |
| MAP3K5       | HDGF2     |                                               |
| MAX          | HEY2      |                                               |
| MCL1         | HRH4      |                                               |
| MGC11324     | HSFY1     |                                               |
| MGC20410     | HSP90AA1  |                                               |

|          |               |
|----------|---------------|
| NOD27    | HSP90AB1      |
| OGFR     | IFNAR1        |
| PCTK2    | IFNAR2        |
| PNRC1    | IFNGR1        |
| PXK      | IQGAP2        |
| RAB27A   | IRF7          |
| SAA1     | ISGF3G / IRF9 |
| SAMHD1   | ITGB1         |
| SIPA1L2  | JAK1          |
| SLC1A1   | KCNIP3        |
| SLC25A28 | KIAA1049      |
| SLC6A16  | KIAA1919      |
| SSB1     | KIAA1944      |
| TLR3     | LIPG          |
| TRIM38   | LOC113444     |
| TRIM56   | LOC51315      |
| UPP2     | MAP2K4        |
| ZC3HAV1  | MAP7          |
| ZNF295   | MCM7          |
| ZNF618   | MLL5          |
|          | MYBL1         |
|          | MYOT          |
|          | MYST1         |
|          | NBEA          |
|          | NCAM2         |
|          | NFATC2        |
|          | NLRP14        |
|          | OTC           |
|          | OTOP1         |
|          | OTUB1         |
|          | PAFAH2        |
|          | PAX5          |
|          | PCDHB12       |
|          | PCDHB14       |
|          | PDIA2         |
|          | PEO1          |
|          | PGD           |
|          | PLEKHA1       |
|          | POLS          |
|          | PPP3CB        |
|          | PRDM5         |
|          | PRIC285       |
|          | RAB4B         |
|          | RALA          |
|          | RANBP2        |
|          | RAPGEF1       |
|          | RASGRF1       |

REM1  
REV3L  
RGPD5  
RNF32  
RNGTT  
ROCK1  
S100A8  
SCG5  
SFRS11  
SFRS15  
SLC27A2  
SMAD3  
SSX2IP  
ST14  
STAT2  
SULT1E1  
TAF5  
TAS2R5  
TEAD3  
TFB2M  
TGFB1  
THNSL1  
TM7SF3  
TTC5  
TYK2  
UCHL3  
ZBTB6  
ZNF224  
ZNF469

## atocyte ISG lists

KM, Bigger CB.



| <b>Sarasin ISGs</b> | <b>Our IEGs</b> |
|---------------------|-----------------|
| ADM                 | ACSL6           |
| AIM2                | ACTN2           |
| ANKRD22             | ADAM30          |
| APOBEC3A            | AKAP8L          |
| APOBEC3F            | ALG10           |
| APOBEC3G            | ANKFY1          |
| APOL6               | APC2            |
| ARHGEF3             | ASCL1           |
| ARNTL               | ASPA            |
| ATF3                | BCHE            |
| AXUD1               | C14ORF100       |
| BIRC4BP             | CAPN6           |
| BRDG1               | CCL26           |
| C17ORF27            | CCRL1           |
| C20ORF18            | CDX2            |
| C6ORF150            | CPA6            |
| C9ORF91             | CSF2            |
| CACNA1A             | DCT             |
| CCDC75              | DHX9            |
| CCL2                | DMRT1           |
| CCL8                | DPP4            |
| CD274               | DR1             |
| CD38                | EDEM3           |
| CD69                | EIF3S3          |
| CD80                | EIF4E           |
| CLEC2B              | ENTPD3          |
| CNP                 | EPO             |
| CXCL10              | ETV3            |
| CXCL11              | FANCG           |
| DCP1A               | FFAR2           |
| DDX58               | FLJ25168        |
| DUSP5               | FLJ45235        |
| ECGF1               | FN1             |
| EIF2AK2             | FOXI1           |
| ELF1                | GCKR            |
| EPSTI1              | GCM1            |
| ETV7                | GJB4            |
| FAM46A              | GUCY1B3         |
| FANCA               | GZMA            |
| FCGR1A              | HDGF2           |
| FLJ10260            | HEY2            |
| FLJ11000            | HRH4            |
| FLJ20035            | HSFY1           |
| FLJ31033            | HSP90AA1        |
| FUT4                | HSP90AB1        |

**reference:**

Sarasin-Filipowicz M, Oakeley EJ, Duong FH, C  
Proc Natl Acad Sci U S A. 2008 May 13;105(19

|           |               |
|-----------|---------------|
| G1P2      | IFNAR1        |
| G1P3      | IFNAR2        |
| GBP1      | IFNGR1        |
| GBP4      | IQGAP2        |
| GBP5      | IRF7          |
| GMPR      | ISGF3G / IRF9 |
| GPR37     | ITGB1         |
| GTPBP1    | JAK1          |
| HERC5     | KCNIP3        |
| HERC6     | KIAA1049      |
| HESX1     | KIAA1919      |
| HPSE      | KIAA1944      |
| IBRDC3    | LIPG          |
| IFI16     | LOC113444     |
| IFI35     | LOC51315      |
| IFI44     | MAP2K4        |
| IFI44L    | MAP7          |
| IFIH1     | MCM7          |
| IFIT1     | MLL5          |
| IFIT2     | MYBL1         |
| IFIT3     | MYOT          |
| IFIT5     | MYST1         |
| IFRG28    | NBEA          |
| IL15RA    | NCAM2         |
| IL1RN     | NFATC2        |
| INDO      | NLRP14        |
| IRF1      | OTC           |
| IRF7      | OTOP1         |
| ISG20     | OTUB1         |
| KIAA1404  | PAFAH2        |
| KIAA1618  | PAX5          |
| LAMP3     | PCDHB12       |
| LGALS9    | PCDHB14       |
| LGP2      | PDIA2         |
| LIPA      | PEO1          |
| LOC129607 | PGD           |
| LOC389289 | PLEKHA1       |
| LOC400368 | POLS          |
| LOC440424 | PPP3CB        |
| LOC441109 | PRDM5         |
| LOC441168 | PRIC285       |
| MAB21L2   | RAB4B         |
| MASTL     | RALA          |
| MCOLN2    | RANBP2        |
| MGC19764  | RAPGEF1       |
| MGC20410  | RASGRF1       |
| MICB      | REM1          |

|             |         |
|-------------|---------|
| MLKL        | REV3L   |
| MSX1        | RGPD5   |
| MT1M        | RNF32   |
| MX1         | RNGTT   |
| MX2         | ROCK1   |
| NCF1        | S100A8  |
| NCOA7       | SCG5    |
| NEXN        | SFRS11  |
| NMI         | SFRS15  |
| NOD27       | SLC27A2 |
| NRN1        | SMAD3   |
| NT5C3       | SSX2IP  |
| OAS1        | ST14    |
| OAS2        | STAT2   |
| OAS3        | SULT1E1 |
| OASL        | TAF5    |
| PARP12      | TAS2R5  |
| PARP14      | TEAD3   |
| PARP9       | TFB2M   |
| PBEF1       | TGFBR1  |
| PHF15       | THNSL1  |
| PLEKHA4     | TM7SF3  |
| PLSCR1      | TTC5    |
| PMAIP1      | TYK2    |
| PML         | UCHL3   |
| PNPT1       | ZBTB6   |
| PRIC285     | ZNF224  |
| PRKD2       | ZNF469  |
| RABGAP1L    |         |
| RGS1        |         |
| RP1-93h18.5 |         |
| RSAD2       |         |
| SAMD9       |         |
| SAMD9L      |         |
| SECTM1      |         |
| SLC25A28    |         |
| SMCHD1      |         |
| SOCS1       |         |
| SP100       |         |
| SP110       |         |
| SPTLC2      |         |
| STAT1       |         |
| TAGAP       |         |
| TAP1        |         |
| TDRD7       |         |
| TFEC        |         |
| TLR3        |         |

TLR7  
TNFSF10  
TNFSF13B  
TRAFD1  
TREX1  
TRIM21  
TRIM25  
TRIM34  
TRIM38  
TRIM56  
TSLP  
USP18  
ZC3HAV1  
ZCCHC2  
ZNF588

hristen V, Terracciano L, Filipowicz W, Heim MH  
) :7034-9. Epub 2008 May 8.

| Feld ISGs    | Our IEGs  |
|--------------|-----------|
| AADAC        | ACSL6     |
| ABAT         | ACTN2     |
| ABCA8        | ADAM30    |
| ABCB1/ ABCB4 | AKAP8L    |
| ABCB10       | ALG10     |
| ABCB4        | ANKFY1    |
| ABCD3        | APC2      |
| ABCG2        | ASCL1     |
| ABHD2        | ASPA      |
| ABHD6        | BCHE      |
| ACAA1        | C14ORF100 |
| ACAA2        | CAPN6     |
| ACADM        | CCL26     |
| ACADSB       | CCRL1     |
| ACADVL       | CDX2      |
| ACMSD        | CPA6      |
| ACO1         | CSF2      |
| ACOX1        | DCT       |
| ACP1         | DHX9      |
| ACSL1        | DMRT1     |
| ACSL5        | DPP4      |
| ADAMTS9      | DR1       |
| ADAR         | EDEM3     |
| ADFP         | EIF3S3    |
| ADH6         | EIF4E     |
| ADRA1A       | ENTPD3    |
| AGMAT        | EPO       |
| AGXT         | ETV3      |
| AHCY         | FANCG     |
| AIM2         | FFAR2     |
| AKR1C3       | FLJ25168  |
| ALAS1        | FLJ45235  |
| ALB          | FN1       |
| ALDH3A2      | FOXI1     |
| ALDH5A1      | GCKR      |
| ALDH6A1      | GCM1      |
| ALDOB        | GJB4      |
| AMACR        | GUCY1B3   |
| AMN          | GZMA      |
| ANGPTL3      | HDGF2     |
| ANK3         | HEY2      |
| ANKFY1       | HRH4      |
| ANKRD15      | HSFY1     |
| ANKRD27      | HSP90AA1  |
| ANXA10       | HSP90AB1  |

**reference:**

Feld JJ, Nanda S, Huang Y, Chen W, Cam M, Pu  
Hepatology. 2007 Nov;46(5):1548-63.

liver bx ISG comparison of matched RRs pre a  
RRon vs RRpre FC>1.5 p<0.001

|                    |               |
|--------------------|---------------|
| ANXA8              | IFNAR1        |
| APLP2              | IFNAR2        |
| APOA5              | IFNGR1        |
| APOB               | IQGAP2        |
| APOBEC3A           | IRF7          |
| APOL3              | ISGF3G / IRF9 |
| APOL6              | ITGB1         |
| APOM               | JAK1          |
| APTX               | KCNIP3        |
| AQP9               | KIAA1049      |
| ARG1               | KIAA1919      |
| ARHGEF7            | KIAA1944      |
| ARL6IP             | LIPG          |
| ARL6IP5            | LOC113444     |
| ARMC1              | LOC51315      |
| ARNTL              | MAP2K4        |
| ASAH1              | MAP7          |
| ATF6               | MCM7          |
| ATP5G3             | MLL5          |
| ATP5O              | MYBL1         |
| AZI2               | MYOT          |
| bA16L21.2.1        | MYST1         |
| BAAT               | NBEA          |
| BACH1              | NCAM2         |
| BBX                | NFATC2        |
| bioB               | NLRP14        |
| bioC               | OTC           |
| bioD               | OTOP1         |
| BIRC3              | OTUB1         |
| BIRC4BP            | PAFAH2        |
| BLZF1              | PAX5          |
| BNIP3              | PCDHB12       |
| BTF3               | PCDHB14       |
| BZW1 /// LOC151579 | PDIA2         |
| C10orf116          | PEO1          |
| C11orf32           | PGD           |
| C17orf27           | PLEKHA1       |
| C19orf22           | POLS          |
| C1orf151           | PPP3CB        |
| C1orf169           | PRDM5         |
| C1orf85            | PRIC285       |
| C1S                | RAB4B         |
| C2                 | RALA          |
| C21orf33           | RANBP2        |
| C2orf25            | RAPGEF1       |
| C5orf13            | RASGRF1       |
| C5orf4             | REM1          |

|         |         |
|---------|---------|
| C6orf62 | REV3L   |
| C7orf6  | RGPD5   |
| C8B     | RNF32   |
| C8orf40 | RNGTT   |
| C9      | ROCK1   |
| C9orf98 | S100A8  |
| CA2     | SCG5    |
| CACNG6  | SFRS11  |
| CALM1   | SFRS15  |
| CANX    | SLC27A2 |
| CASP1   | SMAD3   |
| CAT     | SSX2IP  |
| CBLL1   | ST14    |
| CBR1    | STAT2   |
| CBX4    | SULT1E1 |
| CCND1   | TAF5    |
| CCND3   | TAS2R5  |
| CCNG1   | TEAD3   |
| CCNT2   | TFB2M   |
| CCR1    | TGFBR1  |
| CD36    | THNSL1  |
| CENTD1  | TM7SF3  |
| CHN2    | TTC5    |
| CIDEB   | TYK2    |
| CKS1B   | UCHL3   |
| CLDN23  | ZBTB6   |
| CMAS    | ZNF224  |
| CNIH4   | ZNF469  |
| CNKSR3  |         |
| CNP     |         |
| COL6A2  |         |
| COPG    |         |
| COX5B   |         |
| COX6C   |         |
| COX7C   |         |
| CPEB3   |         |
| CPS1    |         |
| CPT1A   |         |
| CPT2    |         |
| CRAMP1L |         |
| CREBL2  |         |
| CRY1    |         |
| CSK     |         |
| CSR2    |         |
| CTBS    |         |
| CTSB    |         |
| CXCL11  |         |



CXCL14  
CYP1A2  
CYP2C18  
CYP2C19 /// CYP2C9  
CYP2C9  
CYP2J2  
CYP3A4  
CYP3A43  
CYP4A11  
CYP4F3 /// CYP4F2  
CYP4X1  
DAPK1  
DC2  
DCLRE1C  
DDX3Y  
DDX58  
DGAT2  
DGCR14  
DHRS1  
DHRS8  
DMGDH  
DNAJB9  
DNAJC19  
DTX1  
DTX3L  
DUSP1  
E2IG5  
ECGF1  
ECM2  
EEF2  
EGR1  
EHD4  
EIF1AY  
EIF3S6IP  
EIF3S8  
EIF4EBP2  
EIF5A  
ELL2  
EPB41L4B  
EPSTI1  
ERO1L  
ERRFI1  
ETV6  
ETV7  
EXT1  
F13A1  
F13B

F7  
FAHD1  
FAM13A1  
FAM46A  
FAM82A  
FAS  
FBP1  
FBXL11  
FBXO3  
FCAMR  
FCGR1A  
FDX1  
FLJ10159  
FLJ10847  
FLJ11000  
FLJ13391  
FLJ20035  
FLJ20273  
FLJ20280  
FLJ20366  
FLJ30430  
FLJ30596  
FLJ31033  
FLJ31842  
FLJ33708  
FLJ40342  
FLRT3  
FMO5  
FNDC3B  
FNDC5  
FOLH1  
FOXA2  
FOXA3  
FOXQ1  
FUBP1  
G6PC  
GABPA  
GADD45A  
GALNACT-2  
GAPDH  
GART  
GAS5  
GBP1  
GCAT  
GCLM  
GCSH  
Gene Symbol

GFM1  
GIMAP8  
GK  
GLS2  
GLUD2  
GMPR  
GNAS  
GNE  
GNMT  
GNS  
GOT1  
GPAM  
GPHN  
GPR126  
GPX2  
GRHPR  
GSTO1  
GTL3  
H19  
H1FX  
H3F3A /// LOC440926  
HADHA  
HAMP  
HBB  
HBXAP  
HDCMA18P  
HECTD1  
HERC4  
HERPUD1  
HGD  
HINT1  
HIRIP5  
HLA-E  
HLA-F  
HMGB1  
HMGCS2  
HOOK1  
HPD  
HPRT1  
HSD17B4  
HSPA1A  
HSPA1A /// HSPA1B  
HSPA8  
HSPC121  
HSPCA  
HSPCB  
HSPD1

ID1  
IF  
IFI35  
IFI44L  
IFIH1  
IFIT1  
IFIT2  
IFIT3  
IFIT5  
IFITM1  
IFITM2  
IFNA4  
IFRG28  
IGF2  
IGFBP2  
IGH@ /// IGHG1 /// IGHG2 /// IGHG3 /// IGHM  
IGHA1 /// IGHA2 /// MGC27165  
IGKC  
IGKC /// IGKV1-5  
IGKV1-5  
IGKV1D-13  
IGL@ /// IGLC1 /// IGLC2 /// IGLV3-25 /// IGLV2-14  
IGL@ /// IGLC1 /// IGLC2 /// IGLV3-25 /// IGLV2-14 /// IGLJ3  
IGLC2  
IL13RA1  
IL13RA2  
IL17RB  
IL18BP  
IL6R  
INSIG1  
INSR  
IQGAP2  
IRF7  
ISG20  
ISGF3G  
ITGB1  
ITIH2  
JAG1  
JAK1  
KCTD2  
KIAA0082  
KIAA0226  
KIAA0564  
KIAA0830  
KIAA0841  
KIAA1404  
KIAA1447

KLC2L  
KLF11  
KLF3  
KLF6  
KLHDC2  
KTN1 /// PDIA6  
KYNU  
LACTB2  
LAP3  
LBA1  
LBP  
LDB2  
LDHA  
LDLR  
LDLRAP1  
LEPR  
LGALS9  
LGR4  
LIFR  
LIPC  
LITAF  
LOC113386  
LOC123876 /// ACSM2  
LOC129607  
LOC153222  
LOC201895  
LOC23117 /// DKFZp547E087 /// LOC348162 /// LOC440354 /// LOC613037  
LOC253039  
LOC283177  
LOC283666  
LOC283902  
LOC286044  
LOC286167  
LOC389831  
LOC391020  
LOC400368  
LOC440118  
LOC63929  
LOC91353  
LOC91614  
LOC93343  
LONPL  
LPA /// PLG  
LRG1  
LRP6  
LRRFIP1  
LRRFIP2

LSM5  
LTB4DH  
LYPLAL1  
LYSMD3  
MAN2A1  
MAOA  
MAP2K1  
MARCKS  
MAT2B  
MAWBP  
MBL2  
MCEE  
MEST  
MGC16028  
MGC20410  
MGC35366  
MGC46336  
MGST3  
MICB  
MID1IP1  
MIF  
MINA  
MMP14  
MOBK2B  
MRPL37  
MRPS36  
MT1F  
MT1M  
MTHFD1L  
MTMR4  
MTMR9  
MTO1  
MUCDHL  
MX2  
MYCBP  
NAG  
NAPE-PLD  
NAT2  
NBL1  
NCK1  
NCOA7  
NDRG2  
NDUFA3  
NDUFA4  
NDUFB4  
NDUFB6  
NDUFC1

NDUFS4  
NEDD4L  
NEK11  
NET1  
NEXN  
NFE2L2  
NFIA  
NFIL3  
NGFRAP1  
NIPSNAP3A  
NME7  
NMI  
NP  
NR1H4  
NT5C2L1  
NT5C3  
NT5E  
NUDT21  
NUDT3  
NUMB  
OAS1  
OAS2  
OAS3  
OAZ1  
OIT3  
OPTN  
OSBPL8  
OXA1L  
PABPC1  
PACS1  
PAK2  
PANK1  
PAPOLA  
PARP12  
PARP14  
PARP9  
PAX8  
PCBD1  
PCBP2  
PCK1  
PCSK6  
PCTP  
PCYOX1  
PDE3B  
PDK4  
PDLIM5  
PDXK

PECI  
PELO  
PERP  
PGM1  
PGRMC1  
PHF11  
PHF3  
PHYH  
PIGR  
PIK3AP1  
PLEKHC1  
PLSCR1  
POLR2E  
POLR2J  
PON2  
PPAP2B  
PPID  
PPM1A  
PPP2R5C  
PRDX4  
PRIC285  
PRKAA1  
PROS1  
PROX1  
PRRG4  
PSAT1  
PSD3  
PSMAL  
PVRL3  
PXMP2  
RAB15  
RAB2  
RABGAP1L  
RAP1GA1  
RAPGEF2  
RARA  
RARRES3  
RBL2  
RCL1  
RCN1  
RDX  
RetSat  
RGS5  
RHEB  
RHOBTB1  
RHOBTB3  
RNF13



RNF130  
RNH1  
RPL11  
RPL13  
RPL13A /// LOC283340 /// LOC387930  
RPL14  
RPL15  
RPL29  
RPL3  
RPL30  
RPL4  
RPL7A  
RPS15A  
RPS16  
RPS27L  
RPS3  
RPS3A  
RPS4X  
RPS4Y1  
RPS5  
RPS9  
RRBP1  
RSAD2  
RTN2  
RUTBC3  
S100A14  
SAMD9  
SAMD9L  
SAR1B  
SAT  
SBDS /// SBDSP  
SCAP2  
SCCPDH  
SCD  
SCHIP1  
SCLY  
SCO2  
SCOTIN  
SDC2  
SDHC  
SEC11L1  
SEC23B  
SECTM1  
SELS  
SELT  
SERPINC1  
SFN

SFRS7  
SKP1A  
SLAMF6  
SLC10A1  
SLC12A2  
SLC15A3  
SLC16A7  
SLC17A5  
SLC19A2  
SLC1A1  
SLC1A2  
SLC22A7  
SLC25A28  
SLC25A5  
SLC31A1  
SLC35A3  
SLC37A4  
SLC38A4  
SLC39A5  
SLC39A8  
SLC3A1  
SLC4A4  
SLC7A8  
SLCO1B1  
SLCO1B3  
SLCO2B1  
SLICK  
SMAD4  
SMARCA1  
SMARCA2  
SMBP  
SMCHD1  
SN  
SNX4  
SNX5  
SOD1  
SORB  
SORL1  
SOX18  
SP100  
SP110  
SP192  
SPP1  
SPP2  
SQLE  
SRCAP  
ST13

ST3GAL6  
STARD4  
STAT1  
STAT2  
STAU  
STEAP1  
STEAP3  
STK19  
STK38L  
SULT1E1  
SUMO2  
SVIL  
TAGAP  
TAP1  
TAP2  
TBC1D10B  
TBC1D22A  
TBCA  
TCP1  
TDE1  
TDO2  
TFAM  
TFPI  
TGDS  
THEM2  
THOC2  
THOC4  
TINP1  
TM9SF2  
TMED10  
TMED5  
TMEM14B  
TMEM38B  
TMEM41B  
TMEM59  
TMEM64  
TMEM70  
TncRNA  
TNFAIP3  
TNIK  
TNIP1  
TOB1  
TP53AP1  
TP53INP1  
TPARL  
TRAFD1  
TRIB1

TRIM14  
TRIM22  
TRIM25  
TRIM35  
TRIM68  
TSPAN6  
TTBK2  
TTPA  
TXN  
TXNDC5  
TXNIP  
UAP1  
UBE1L  
UBE2D4  
UBE2H  
UBE2L6  
UBL5  
UBLCP1  
UBXD2  
UGP2  
UGT3A1  
UHMK1  
UQCRC2  
USP18  
USP9Y  
VNN1  
WDR72  
WIRE  
XIST  
XRCC5  
YEATS2  
ZCCHC2  
ZF  
ZFAND1  
ZFYVE26  
ZKSCAN1  
ZNF533

asek SN, Schweigler LM, Theodore D, Zacks SL, Liang TJ, Fried MW.

ind on IFNa tx

| He ISGs  | Our IEGs  |
|----------|-----------|
| ARL5B    | ACSL6     |
| BAZ1A    | ACTN2     |
| BLZF1    | ADAM30    |
| BST2     | AKAP8L    |
| C1ORF38  | ALG10     |
| C3AR1    | ANKFY1    |
| CA7      | APC2      |
| CARHSP1  | ASCL1     |
| CASP1    | ASPA      |
| CCRL1    | BCHE      |
| CD38     | C14ORF100 |
| CD40     | CAPN6     |
| CD53     | CCL26     |
| CDC25B   | CCRL1     |
| CMPK2    | CDX2      |
| CSF2RB   | CPA6      |
| CTSO     | CSF2      |
| CTSS     | DCT       |
| CX3CL1   | DHX9      |
| CXCL10   | DMRT1     |
| CXCL9    | DPP4      |
| CYORF15A | DR1       |
| CYP1B1   | EDEM3     |
| DDO      | EIF3S3    |
| DDX58    | EIF4E     |
| DDX60L   | ENTPD3    |
| DUOXA1   | EPO       |
| DUOXA2   | ETV3      |
| DUSP6    | FANCG     |
| EIF2AK2  | FFAR2     |
| EPSTI1   | FLJ25168  |
| ETV6     | FLJ45235  |
| EXT1     | FN1       |
| FAM111A  | FOXI1     |
| FAM26F   | GCKR      |
| FAM72B   | GCM1      |
| FLJ11171 | GJB4      |
| FLJ39639 | GUCY1B3   |
| FST      | GZMA      |
| GBP1     | HDGF2     |
| GBP2     | HEY2      |
| GCNT1    | HRH4      |
| GLB1     | HSFY1     |
| GMPR     | HSP90AA1  |
| GNB4     | HSP90AB1  |

**reference:**

He XS, Nanda S, Ji X, Calderon-Rodriguez GM, J Interferon Cytokine Res. 2010 May;30(5):31:

Primary Human Hepatocyte ISGs after 6h IFN :

|              |               |
|--------------|---------------|
| HIST2H2AA3   | IFNAR1        |
| HK2          | IFNAR2        |
| HLA-DPA1     | IFNGR1        |
| HLA-DQB1     | IQGAP2        |
| HLA-DRB1     | IRF7          |
| HLA-DRB4     | ISGF3G / IRF9 |
| HLA-E        | ITGB1         |
| HMCN2        | JAK1          |
| IFI16        | KCNIP3        |
| IFI30        | KIAA1049      |
| IFI44L       | KIAA1919      |
| IFI6         | KIAA1944      |
| IFIH1        | LIPG          |
| IFIT1        | LOC113444     |
| IFIT2        | LOC51315      |
| IFITM1       | MAP2K4        |
| IL18BP       | MAP7          |
| IL1RN        | MCM7          |
| INDO         | MLL5          |
| IRF2         | MYBL1         |
| IRF7         | MYOT          |
| IRF8         | MYST1         |
| ISG15        | NBEA          |
| ISG20        | NCAM2         |
| JAK2         | NFATC2        |
| KLHL17       | NLRP14        |
| LAMP3        | OTC           |
| LAP3         | OTOP1         |
| LMO2         | OTUB1         |
| LOC100129349 | PAFAH2        |
| LOC285194    | PAX5          |
| LOC644151    | PCDHB12       |
| LOC727820    | PCDHB14       |
| LOC730054    | PDIA2         |
| LRRC44       | PEO1          |
| MAP2K5       | PGD           |
| MASTL        | PLEKHA1       |
| MEG3         | POLS          |
| MS4A4A       | PPP3CB        |
| MS4A6A       | PRDM5         |
| MX1          | PRIC285       |
| MX2          | RAB4B         |
| MXD1         | RALA          |
| MYC          | RANBP2        |
| NLRC5        | RAPGEF1       |
| NM1          | RASGRF1       |
| NT5C3        | REM1          |

|          |         |
|----------|---------|
| OAS1     | REV3L   |
| OAS2     | RGPD5   |
| OAS3     | RNF32   |
| OTUD4    | RNGTT   |
| PARP14   | ROCK1   |
| PLA1A    | S100A8  |
| PLA2G2A  | SCG5    |
| PLAUR    | SFRS11  |
| PLEK     | SFRS15  |
| PLEKHA4  | SLC27A2 |
| PLSCR1   | SMAD3   |
| PML      | SSX2IP  |
| PPM1K    | ST14    |
| PRIC285  | STAT2   |
| PSMB10   | SULT1E1 |
| PSMB8    | TAF5    |
| RAB4B    | TAS2R5  |
| RAB8B    | TEAD3   |
| RABGAP1L | TFB2M   |
| RARRES3  | TGFBR1  |
| RASGRP3  | THNSL1  |
| RASSF5   | TM7SF3  |
| RNF213   | TTC5    |
| RNF34    | TYK2    |
| RSAD2    | UCHL3   |
| RTP4     | ZBTB6   |
| SAMD9L   | ZNF224  |
| SAMHD1   | ZNF469  |
| SDS      |         |
| SELL     |         |
| SLC15A3  |         |
| SLC22A23 |         |
| SOCS1    |         |
| SP110    |         |
| SRGN     |         |
| STAT1    |         |
| STAT2    |         |
| TAP1     |         |
| TAP2     |         |
| TLR2     |         |
| TMEM110  |         |
| TMEM192  |         |
| TMEM50A  |         |
| TMEM86A  |         |
| TNFSF10  |         |
| TNFSF13B |         |
| TRAFD1   |         |



TRIM22  
TRIM31  
TRIM46  
TXNIP  
UBD  
UBE2D4  
UBE2L6  
USP18  
VAMP5  
VCAM1  
WARS  
WNT10B  
XRN1  
ZCCHC2  
ZNF313  
ZNFX1

Greenberg HB, Liang TJ.

1-20.

alpha

**Lanford/Sarasin/Felds/He Composite Primary Hepatocyte ISG list****Our IEG Li**

|              |           |
|--------------|-----------|
| AADAC        | ACSL6     |
| ABAT         | ACTN2     |
| ABCA8        | ADAM30    |
| ABCB1/ ABCB4 | AKAP8L    |
| ABCB10       | ALG10     |
| ABCB4        | ANKFY1    |
| ABCD3        | APC2      |
| ABCG2        | ASCL1     |
| ABHD2        | ASPA      |
| ABHD6        | BCHE      |
| ABLIM3       | C14ORF10C |
| ACAA1        | CAPN6     |
| ACAA2        | CCL26     |
| ACADM        | CCRL1     |
| ACADSB       | CDX2      |
| ACADVL       | CPA6      |
| ACMSD        | CSF2      |
| ACO1         | DCT       |
| ACOX1        | DHX9      |
| ACP1         | DMRT1     |
| ACSL1        | DPP4      |
| ACSL5        | DR1       |
| ADAMTS9      | EDEM3     |
| ADAR         | EIF3S3    |
| ADFP         | EIF4E     |
| ADH6         | ENTPD3    |
| ADM          | EPO       |
| ADRA1A       | ETV3      |
| AGMAT        | FANCG     |
| AGXT         | FFAR2     |
| AHCY         | FLJ25168  |
| AIM2         | FLJ45235  |
| AKR1C3       | FN1       |
| ALAS1        | FOXI1     |
| ALB          | GCKR      |
| ALDH3A2      | GCM1      |
| ALDH5A1      | GJB4      |
| ALDH6A1      | GUCY1B3   |
| ALDOB        | GZMA      |
| AMACR        | HDGF2     |
| AMN          | HEY2      |
| ANGPTL3      | HRH4      |
| ANK3         | HSFY1     |
| ANKFY1       | HSP90AA1  |

ANKRD15  
ANKRD22  
ANKRD27  
ANXA10  
ANXA8  
APLP2  
APOA5  
APOB  
APOBEC3A  
APOBEC3F  
APOBEC3G  
APOL3  
APOL6  
APOM  
APTX  
AQP9  
ARG1  
ARG2  
ARHGEF3  
ARHGEF7  
ARL5B  
ARL6IP  
ARL6IP5  
ARMC1  
ARNTL  
ASAH1  
ATF3  
ATF6  
ATP5G3  
ATP5O  
AXUD1  
AZI2  
bA16L21.2.1  
BAAT  
BACH1  
BAZ1A  
BAZ2A  
BBX  
bioB  
bioC  
bioD  
BIRC3  
BIRC4BP  
BLZF1  
BNIP3  
BRDG1  
BST2

HSP90AB1  
IFNAR1  
IFNAR2  
IFNGR1  
IQGAP2  
IRF7  
IRF9  
ITGB1  
JAK1  
KCNIP3  
KIAA1049  
KIAA1919  
KIAA1944  
LIPG  
LOC113444  
LOC51315  
MAP2K4  
MAP7  
MCM7  
MLL5  
MYBL1  
MYOT  
MYST1  
NBEA  
NCAM2  
NFATC2  
NLRP14  
OTC  
OTOP1  
OTUB1  
PAFAH2  
PAX5  
PCDHB12  
PCDHB14  
PDIA2  
PEO1  
PGD  
PLEKHA1  
POLS  
PPP3CB  
PRDM5  
PRIC285  
RAB4B  
RALA  
RANBP2  
RAPGEF1  
RASGRF1

BTF3  
BZW1 /// LOC151579  
C10orf116  
C10ORF18  
C11orf32  
C17ORF27  
C19orf22  
C1orf151  
C1orf169  
C1ORF38  
C1orf85  
C1S  
C2  
C20ORF18  
C21orf33  
C2orf25  
C3AR1  
C5orf13  
C5orf4  
C6ORF150  
C6orf62  
C7orf6  
C8B  
C8orf40  
C9  
C9ORF91  
C9orf98  
CA2  
CA7  
CACNA1A  
CACNG6  
CALM1  
CANX  
CARHSP1  
CASP1  
CASP7  
CAT  
CBLL1  
CBR1  
CBX4  
CCDC75  
CCL2  
CCL8  
CCND1  
CCND3  
CCNG1  
CCNT2

REM1  
REV3L  
RGPD5  
RNF32  
RNGTT  
ROCK1  
S100A8  
SCG5  
SFRS11  
SFRS15  
SLC27A2  
SMAD3  
SSX2IP  
ST14  
STAT2  
SULT1E1  
TAF5  
TAS2R5  
TEAD3  
TFB2M  
TGFB1  
THNSL1  
TM7SF3  
TTC5  
TYK2  
UCHL3  
ZBTB6  
ZNF224  
ZNF469

CCR1

CCRL1

CD274

CD36

CD38

CD40

CD53

CD69

CD80

CDC25B

CENTD1

CHN2

CIDEB

CKS1B

CLDN23

CLEC2B

CMAS

CMPK2

CNIH4

CNKSR3

CNP

COL6A2

COPG

COX5B

COX6C

COX7C

CPEB3

CPS1

CPT1A

CPT2

CRAMP1L

CREBL2

CRP

CRY1

CSF2RB

CSK

CSR2P

CTBS

CTCF

CTSB

CTSO

CTSS

CX3CL1

CXCL10

CXCL11

CXCL14

CXCL9

CYORF15A  
CYP1A2  
CYP1B1  
CYP2C18  
CYP2C19 /// CYP2C9  
CYP2C9  
CYP2J2  
CYP3A4  
CYP3A43  
CYP4A11  
CYP4F3 /// CYP4F2  
CYP4X1  
DAPK1  
DC2  
DCLRE1C  
DCP1A  
DDO  
DDX3X  
DDX3Y  
DDX58  
DDX60L  
DGAT2  
DGCR14  
DHRS1  
DHRS8  
DLL1  
DMGDH  
DNAJB9  
DNAJC19  
DTX1  
DTX3L  
DUOXA1  
DUOXA2  
DUSP1  
DUSP5  
DUSP6  
E2IG5  
ECGF1  
ECM2  
EEF2  
EGR1  
EHD4  
EIF1AY  
EIF2AK2  
EIF2C2  
EIF3S6IP  
EIF3S8

EIF4EBP2  
EIF5A  
ELF1  
ELL2  
EPB41L4B  
EPSTI1  
ERO1L  
ERRFI1  
ETV6  
ETV7  
EXT1  
F13A1  
F13B  
F7  
FAHD1  
FAM111A  
FAM13A1  
FAM26F  
FAM46A  
FAM46C  
FAM72B  
FAM82A  
FANCA  
FAS  
FBP1  
FBXL11  
FBXO3  
FCAMR  
FCGR1A  
FDX1  
FLJ10159  
FLJ10260  
FLJ10847  
FLJ11000  
FLJ11171  
FLJ13391  
FLJ20035  
FLJ20273  
FLJ20280  
FLJ20366  
FLJ30430  
FLJ30596  
FLJ31033  
FLJ31842  
FLJ33708  
FLJ39370  
FLJ39639



FLJ39739  
FLJ40342  
FLRT3  
FMO5  
FNDC3B  
FNDC5  
FOLH1  
FOXA2  
FOXA3  
FOXQ1  
FST  
FUBP1  
FUT4  
G1P2  
G1P3  
G6PC  
GABPA  
GADD45A  
GALNACT-2  
GAPDH  
GART  
GAS5  
GBP1  
GBP2  
GBP4  
GBP5  
GCAT  
GCLM  
GCNT1  
GCSH  
Gene Symbol  
GFM1  
GIMAP8  
GJA4  
GK  
GLB1  
GLRX  
GLS2  
GLUD2  
GMPR  
GNAS  
GNB4  
GNE  
GNMT  
GNS  
GOT1  
GPAM

GPHN  
GPR126  
GPR37  
GPX2  
GRHPR  
GSTO1  
GTL3  
GTPBP1  
H19  
H1FX  
H3F3A /// LOC440926  
HADHA  
HAMP  
HBB  
HBXAP  
HDCMA18P  
HECTD1  
HERC4  
HERC5  
HERC6  
HERPUD1  
HESX1  
HGD  
HINT1  
HIRIP5  
HIST2H2AA3  
HK2  
HLA-DPA1  
HLA-DQB1  
HLA-DRB1  
HLA-DRB4  
HLA-E  
HLA-F  
HMCN2  
HMGB1  
HMGCS2  
HOOK1  
HPD  
HPRT1  
HPSE  
HSD17B4  
HSPA1A  
HSPA1A /// HSPA1B  
HSPA8  
HSPC121  
HSPCA  
HSPCB

HSPD1  
IBRDC3  
ID1  
IF  
IFI16  
IFI27  
IFI30  
IFI35  
IFI44  
IFI44L  
IFI6  
IFIH1  
IFIT1  
IFIT2  
IFIT3  
IFIT5  
IFITM1  
IFITM2  
IFNA4  
IFRG28  
IGF2  
IGFBP2  
IGH@ /// IGHG1 /// IGHG2 /// IGHG3 /// IGHM  
IGHA1 /// IGHA2 /// MGC27165  
IGKC  
IGKC /// IGKV1-5  
IGKV1-5  
IGKV1D-13  
IGL@ /// IGLC1 /// IGLC2 /// IGLV3-25 /// IGLV2-14  
IGL@ /// IGLC1 /// IGLC2 /// IGLV3-25 /// IGLV2-14 /// IGLJ3  
IGLC2  
IL13RA1  
IL13RA2  
IL15RA  
IL17RB  
IL18BP  
IL1RN  
IL28RA  
IL6R  
INDO  
INSIG1  
INSR  
IQGAP2  
IRF1  
IRF2  
IRF7  
IRF8

IRS2  
ISG15  
ISG20  
ISGF3G  
ITGB1  
ITIH2  
JAG1  
JAK1  
JAK2  
JUNB  
KCTD2  
KIAA0082  
KIAA0226  
KIAA0564  
KIAA0830  
KIAA0841  
KIAA1217  
KIAA1404  
KIAA1447  
KIAA1618  
KIAA1971  
KLC2L  
KLF11  
KLF3  
KLF6  
KLHDC2  
KLHL17  
KTN1 /// PDIA6  
KYNU  
LACTB2  
LAMP3  
LAP3  
LBA1  
LBP  
LDB2  
LDHA  
LDLR  
LDLRAP1  
LEPR  
LGALS9  
LGP2  
LGR4  
LIFR  
LIPA  
LIPC  
LITAF  
LMO2

LOC100129349  
LOC113386  
LOC123876 /// ACSM2  
LOC129607  
LOC153222  
LOC201895  
LOC23117 /// DKFZp547E087 /// LOC348162 /// LOC440354 /// LOC613037  
LOC253039  
LOC283177  
LOC283666  
LOC283902  
LOC285194  
LOC286044  
LOC286167  
LOC389289  
LOC389831  
LOC391020  
LOC400368  
LOC440118  
LOC440424  
LOC441109  
LOC441168  
LOC63929  
LOC644151  
LOC727820  
LOC730054  
LOC91353  
LOC91614  
LOC93343  
LONPL  
LPA /// PLG  
LRG1  
LRP6  
LRRC44  
LRRFIP1  
LRRFIP2  
LSM5  
LTB4DH  
LYPLAL1  
LYSMD3  
MAB21L2  
MAN2A1  
MAOA  
MAP2K1  
MAP2K5  
MAP3K5  
MARCKS

MASTL  
MAT2B  
MAWBP  
MAX  
MBL2  
MCEE  
MCL1  
MCOLN2  
MEG3  
MEST  
MGC11324  
MGC16028  
MGC19764  
MGC20410  
MGC35366  
MGC46336  
MGST3  
MICB  
MID1IP1  
MIF  
MINA  
MLKL  
MMP14  
MOBKL2B  
MRPL37  
MRPS36  
MS4A4A  
MS4A6A  
MSX1  
MT1F  
MT1M  
MTHFD1L  
MTMR4  
MTMR9  
MTO1  
MUCDHL  
MX1  
MX2  
MXD1  
MYC  
MYCBP  
NAG  
NAPE-PLD  
NAT2  
NBL1  
NCF1  
NCK1

NCOA7  
NDRG2  
NDUFA3  
NDUFA4  
NDUFB4  
NDUFB6  
NDUFC1  
NDUFS4  
NEDD4L  
NEK11  
NET1  
NEXN  
NFE2L2  
NFIA  
NFIL3  
NGFRAP1  
NIPSNAP3A  
NLRC5  
NM1  
NME7  
NMI  
NOD27  
NP  
NR1H4  
NRN1  
NT5C2L1  
NT5C3  
NT5E  
NUDT21  
NUDT3  
NUMB  
OAS1  
OAS2  
OAS3  
OASL  
OAZ1  
OGFR  
OIT3  
OPTN  
OSBPL8  
OTUD4  
OXA1L  
PABPC1  
PACS1  
PAK2  
PANK1  
PAPOLA

PARP12  
PARP14  
PARP9  
PAX8  
PBEF1  
PCBD1  
PCBP2  
PCK1  
PCSK6  
PCTK2  
PCTP  
PCYOX1  
PDE3B  
PDK4  
PDLIM5  
PDXK  
PECI  
PELO  
PERP  
PGM1  
PGRMC1  
PHF11  
PHF15  
PHF3  
PHYH  
PIGR  
PIK3AP1  
PLA1A  
PLA2G2A  
PLAUR  
PLEK  
PLEKHA4  
PLEKHC1  
PLSCR1  
PMAIP1  
PML  
PNPT1  
PNRC1  
POLR2E  
POLR2J  
PON2  
PPAP2B  
PPID  
PPM1A  
PPM1K  
PPP2R5C  
PRDX4



**PRIC285**

PRKAA1  
PRKD2  
PROS1  
PROX1  
PRRG4  
PSAT1  
PSD3  
PSMAL  
PSMB10  
PSMB8  
PVRL3  
PXK  
PXMP2  
RAB15  
RAB2  
RAB27A

**RAB4B**

RAB8B  
RABGAP1L  
RAP1GA1  
RAPGEF2  
RARA  
RARRES3  
RASGRP3  
RASSF5  
RBL2  
RCL1  
RCN1  
RDX  
RetSat  
RGS1  
RGS5  
RHEB  
RHOBTB1  
RHOBTB3  
RNF13  
RNF130  
RNF213  
RNF34  
RNH1  
RP1-93h18.5  
RPL11  
RPL13  
RPL13A /// LOC283340 /// LOC387930  
RPL14  
RPL15

RPL29  
RPL3  
RPL30  
RPL4  
RPL7A  
RPS15A  
RPS16  
RPS27L  
RPS3  
RPS3A  
RPS4X  
RPS4Y1  
RPS5  
RPS9  
RRBP1  
RSAD2  
RTN2  
RTP4  
RUTBC3  
S100A14  
SAA1  
SAMD9  
SAMD9L  
SAMHD1  
SAR1B  
SAT  
SBDS /// SBDSP  
SCAP2  
SCCPDH  
SCD  
SCHIP1  
SCLY  
SCO2  
SCOTIN  
SDC2  
SDHC  
SDS  
SEC11L1  
SEC23B  
SECTM1  
SELL  
SELS  
SELT  
SERPINC1  
SFN  
SFRS7  
SIPA1L2

SKP1A  
SLAMF6  
SLC10A1  
SLC12A2  
SLC15A3  
SLC16A7  
SLC17A5  
SLC19A2  
SLC1A1  
SLC1A2  
SLC22A23  
SLC22A7  
SLC25A28  
SLC25A5  
SLC31A1  
SLC35A3  
SLC37A4  
SLC38A4  
SLC39A5  
SLC39A8  
SLC3A1  
SLC4A4  
SLC6A16  
SLC7A8  
SLCO1B1  
SLCO1B3  
SLCO2B1  
SLICK  
SMAD4  
SMARCA1  
SMARCA2  
SMBP  
SMCHD1  
SN  
SNX4  
SNX5  
SOCS1  
SOD1  
SORD  
SORL1  
SOX18  
SP100  
SP110  
SP192  
SPP1  
SPP2  
SPTLC2

SQLC  
SRCAP  
SRGN  
SSB1  
ST13  
ST3GAL6  
STARD4  
STAT1  
STAT2  
STAU  
STEAP1  
STEAP3  
STK19  
STK38L  
SULT1E1  
SUMO2  
SVIL  
TAGAP  
TAP1  
TAP2  
TBC1D10B  
TBC1D22A  
TBCA  
TCP1  
TDE1  
TDO2  
TDRD7  
TFAM  
TFEC  
TFPI  
TGDS  
THEM2  
THOC2  
THOC4  
TINP1  
TLR2  
TLR3  
TLR7  
TM9SF2  
TMED10  
TMED5  
TMEM110  
TMEM14B  
TMEM192  
TMEM38B  
TMEM41B  
TMEM50A

TMEM59  
TMEM64  
TMEM70  
TMEM86A  
TncRNA  
TNFAIP3  
TNFSF10  
TNFSF13B  
TNIK  
TNIP1  
TOB1  
TP53AP1  
TP53INP1  
TPARL  
TRAFD1  
TREX1  
TRIB1  
TRIM14  
TRIM21  
TRIM22  
TRIM25  
TRIM31  
TRIM34  
TRIM35  
TRIM38  
TRIM46  
TRIM56  
TRIM68  
TSLP  
TSPAN6  
TTBK2  
TTPA  
TXN  
TXNDC5  
TXNIP  
UAP1  
UBD  
UBE1L  
UBE2D4  
UBE2H  
UBE2L6  
UBL5  
UBLCP1  
UBXD2  
UGP2  
UGT3A1  
UHMK1

UPP2  
UQCRC2  
USP18  
USP9Y  
VAMP5  
VCAM1  
VNN1  
WARS  
WDR72  
WIRE  
WNT10B  
XIST  
XRCC5  
XRN1  
YEATS2  
ZC3HAV1  
ZCCHC2  
ZF  
ZFAND1  
ZFYVE26  
ZKSCAN1  
ZNF295  
ZNF313  
ZNF533  
ZNF588  
ZNF618  
ZNFX1

st

**List of Our IEGs that have been described as Primary Hepatocyte IFN alpha Stimulated C**

ANKFY1  
CCRL1  
IQGAP2  
IRF7  
ITGB1  
JAK1  
PRIC285=PDIP1  
RAB4B  
STAT2  
SULT1E1

**Percent of our IEGs that have been described as Primary Hepatocyte IFNa SGs**













































Genes

8.333333

## Table S7. HCV IEG Screen Comparative Analysis

### Schoggins' IEGs that inhibit to <76% Jc1

ADFP  
 AGPAT9  
 AIM2  
 ALDH1A1  
 ANGPTL1  
 APOBEC3G  
 APOL1  
 APOL2  
 ARG2  
 B2M  
 BATF2  
 BCL2L14  
 BLVRA  
 BLZF1  
 C10orf10  
 C15orf48  
 C22orf28  
 C4orf33  
 C5orf27  
 C5orf39  
 CCDC109B  
 CCDC92  
 CCL19  
 CCL2  
 CCL5  
 CCL8  
 CD69  
 CD80  
 CEBPD  
 CES1  
 CFB  
 CMAH  
 CNP  
 COMMD3  
 CREB3L3  
 CRP  
 CSDA  
 CXCL9  
 CYP1B1  
 DDIT4  
 DDX58  
 DDX60  
 DEFB1

### Fusco JFH1 IEGs

ACSL6  
 ACTN2  
 ADAM30  
 AKAP8L  
 ALG10  
 ANKFY1  
 APC2  
 ASCL1  
 ASPA  
 BCHE  
 C14ORF100  
 CAPN6  
 CCL26  
 CCRL1  
 CDX2  
 CPA6  
 CSF2  
 DCT  
 DHX9  
 DMRT1  
 DPP4  
 DR1  
 EDEM3  
 EIF3S3  
 EIF4E  
 ENTPD3  
 EPO  
 ETV3  
 FANCG  
 FFAR2  
 FLJ25168  
 FLJ45235  
 FN1  
 FOXI1  
 GCKR  
 GCM1  
 GJB4  
 GUCY1B3  
 GZMA  
 HDGF2  
 HEY2  
 HRH4  
 HSFY1

DTX3L  
DYNLT1  
EIF2AK2  
EPSTI1  
ETV7  
FAM125B  
FAM70A  
FBXO6  
FLJ11286  
FLJ39739  
FUT4  
G6PC  
GBP2  
GCH1  
GEM  
GK  
GTPBP2  
GZMB  
HLA-G  
HPSE  
HSH2D  
IFI35  
IFI44  
IFIH1  
IFIT1  
IFIT5  
IFITM2  
IFNGR1  
IGFBP2  
IL17RB  
IMPA2  
IRF1  
IRF2  
IRF7  
IRF9  
ISG15  
JUNB  
LAP3  
LGALS3  
LGALS9  
LRG1  
LY6E  
MAB21L2  
MAFB  
MAP3K14  
MKX  
MOV10

HSP90AA1  
HSP90AB1  
IFNAR1  
IFNAR2  
IFNGR1  
IQGAP2  
IRF7  
ISGF3G / IRF9  
ITGB1  
JAK1  
KCNIP3  
KIAA1049  
KIAA1919  
KIAA1944  
LIPG  
LOC113444  
LOC51315  
MAP2K4  
MAP7  
MCM7  
MLL5  
MYBL1  
MYOT  
MYST1  
NBEA  
NCAM2  
NFATC2  
NLRP14  
OTC  
OTOP1  
OTUB1  
PAFAH2  
PAX5  
PCDHB12  
PCDHB14  
PDIA2  
PEO1  
PGD  
PLEKHA1  
POLS  
PPP3CB  
PRDM5  
PRIC285  
RAB4B  
RALA  
RANBP2  
RAPGEF1

MS4A4A  
MT1F  
MT1H  
MYD88  
N4BP1  
NAPA  
NCF1  
NOD2  
NOS2A  
NRN1  
NT5C3  
NUP50  
OAS3  
OASL  
P2RY6  
PABPC4  
PARP12  
PBEF1  
PCTK2  
PDGFRL  
PDK1  
PFKFB3  
PI4K2B  
PMM2  
PNRC1  
PRAME  
PUS1  
S100A8  
SAT3  
SECTM1  
SERPINE1  
SERPING1  
SIRPA  
SLC1A1  
SLC25A28  
SLFN5  
SOCS1  
SOCS2  
STEAP4  
THBD  
TLR3  
TMEM49  
TMEM51  
TNFAIP6  
TNFSF10  
TNFSF13B  
TRIM14

RASGRF1  
REM1  
REV3L  
RGPD5  
RNF32  
RNGTT  
ROCK1  
S100A8  
SCG5  
SFRS11  
SFRS15  
SLC27A2  
SMAD3  
SSX2IP  
ST14  
STAT2  
SULT1E1  
TAFAS  
TAS2R5  
TEAD3  
TFB2M  
TGFBFR1  
THNSL1  
TM7SF3  
TTC5  
TYK2  
UCHL3  
ZBTB6  
ZNF224  
ZNF469

TRIM38

TYMP

UBA7

UPP2

USP18

VAMP5

VEGFC

WARS

XAF1

**Bartenschlager Replicon IEGs**

IRF1  
IRF9  
PSME2  
PSMB9  
RnaseL  
IFITM1  
IFITM3  
IFIT3  
TRIM14  
NOS2

**Fusco JFH1 IEGs**

ACSL6  
ACTN2  
ADAM30  
AKAP8L  
ALG10  
ANKFY1  
APC2  
ASCL1  
ASPA  
BCHE  
C14ORF100  
CAPN6  
CCL26  
CCRL1  
CDX2  
CPA6  
CSF2  
DCT  
DHX9  
DMRT1  
DPP4  
DR1  
EDEM3  
EIF3S3  
EIF4E  
ENTPD3  
EPO  
ETV3  
FANCG  
FFAR2  
FLJ25168  
FLJ45235  
FN1  
FOXI1  
GCKR  
GCM1  
GJB4  
GUCY1B3  
GZMA  
HDGF2  
HEY2  
HRH4  
HSFY1  
HSP90AA1  
HSP90AB1  
IFNAR1



IFNAR2  
IFNGR1  
IQGAP2  
IRF7  
ISGF3G / IRF9  
ITGB1  
JAK1  
KCNIP3  
KIAA1049  
KIAA1919  
KIAA1944  
LIPG  
LOC113444  
LOC51315  
MAP2K4  
MAP7  
MCM7  
MLL5  
MYBL1  
MYOT  
MYST1  
NBEA  
NCAM2  
NFATC2  
NLRP14  
OTC  
OTOP1  
OTUB1  
PAFAH2  
PAX5  
PCDHB12  
PCDHB14  
PDIA2  
PEO1  
PGD  
PLEKHA1  
POLS  
PPP3CB  
PRDM5  
PRIC285  
RAB4B  
RALA  
RANBP2  
RAPGEF1  
RASGRF1  
REM1  
REV3L

RGPD5  
RNF32  
RNGTT  
ROCK1  
S100A8  
SCG5  
SFRS11  
SFRS15  
SLC27A2  
SMAD3  
SSX2IP  
ST14  
STAT2  
SULT1E1  
TAF5  
TAS2R5  
TEAD3  
TFB2M  
TGFB1  
THNSL1  
TM7SF3  
TTC5  
TYK2  
UCHL3  
ZBTB6  
ZNF224  
ZNF469

**Zhao replicon IEGs**

ACSS2  
AKR1C1  
ANKRD30A  
ASCC3L1  
ASTL  
ATP5C1  
BACE1  
C14orf177  
C1orf55  
CDC5L  
COPB2  
CORO1C  
CORT  
CTRB1  
CTSK  
DGCR2  
EFTUD2  
EIF3S10  
ERH  
GAB4  
GALP  
GBP5  
GDI2  
GPC4  
GPR18  
HCFC1  
HNRPC  
HNRPL  
IFNAR1  
IK  
IRF9  
JAK1  
KIAA1604  
LOC283587  
LOC284393  
LOC285658  
LOC342994  
LOC388460  
LOC388532  
LOC392742  
LOC401155  
LSM6  
LSM7  
LSM8  
LYPD2  
MEOX2

**Fusco JFH1 IEGs**

ACSL6  
ACTN2  
ADAM30  
AKAP8L  
ALG10  
ANKFY1  
APC2  
ASCL1  
ASPA  
BCHE  
C14ORF100  
CAPN6  
CCL26  
CCRL1  
CDX2  
CPA6  
CSF2  
DCT  
DHX9  
DMRT1  
DPP4  
DR1  
EDEM3  
EIF3S3  
EIF4E  
ENTPD3  
EPO  
ETV3  
FANCG  
FFAR2  
FLJ25168  
FLJ45235  
FN1  
FOX11  
GCKR  
GCM1  
GJB4  
GUCY1B3  
GZMA  
HDGF2  
HEY2  
HRH4  
HSFY1  
HSP90AA1  
HSP90AB1  
IFNAR1

|               |               |
|---------------|---------------|
| MFAP1         | IFNAR2        |
| MRPL10        | IFNGR1        |
| MYOT          | IQGAP2        |
| MYST1         | IRF7          |
| NAP5          | ISGF3G / IRF9 |
| NHP2L1        | ITGB1         |
| PDCD5         | JAK1          |
| PKD1L3        | KCNIP3        |
| PPP2R2A       | KIAA1049      |
| PRPF6         | KIAA1919      |
| PRPF8         | KIAA1944      |
| RBM22         | LIPG          |
| RNF187        | LOC113444     |
| RP11-487F23.3 | LOC51315      |
| RPL10         | MAP2K4        |
| RPL11         | MAP7          |
| RPL14L        | MCM7          |
| RPL17         | MLL5          |
| RPL21         | MYBL1         |
| RPL32         | MYOT          |
| RPL5          | MYST1         |
| RPL7          | NBEA          |
| RPL7P6        | NCAM2         |
| RUVBL1        | NFATC2        |
| RUVBL2        | NLRP14        |
| RWDD2         | OTC           |
| SART1         | OTOP1         |
| SF3A1         | OTUB1         |
| SF3A3         | PAFAH2        |
| SF3B1         | PAX5          |
| SF3B14        | PCDHB12       |
| SF3B4         | PCDHB14       |
| SF3B5         | PDIA2         |
| SMU1          | PEO1          |
| SNRP70        | PGD           |
| SNRPD1        | PLEKHA1       |
| SON           | POLS          |
| STAT2         | PPP3CB        |
| STK40         | PRDM5         |
| TAS2R50       | PRIC285       |
| TSGA10IP      | RAB4B         |
| TYK2          | RALA          |
| UBA52         | RANBP2        |
| WBP11         | RAPGEF1       |
| ZC3HAV1       | RASGRF1       |
| ZFP64         | REM1          |
| ZMAT2         | REV3L         |

RGPD5  
RNF32  
RNGTT  
ROCK1  
S100A8  
SCG5  
SFRS11  
SFRS15  
SLC27A2  
SMAD3  
SSX2IP  
ST14  
STAT2  
SULT1E1  
TAF5  
TAS2R5  
TEAD3  
TFB2M  
TGFB1  
THNSL1  
TM7SF3  
TTC5  
TYK2  
UCHL3  
ZBTB6  
ZNF224  
ZNF469

**Notes:**

hits found at all 3 prior IEG screens : IRF9

hits found in 2 of 3 prior IEG screens: IFIH1, IRF1, TRIM14

**Hits from this combined list (Schoggins <76% + Zhao + Barten) that are found on Fusco list:**

IFNAR1

IFNGR1

IRF7

JAK1

MYST1

MYOT

S100A8

STAT2

TYK2

7.5 % of our hits are previously described HCV IEGs

**Schoggins Jc1**

ADFP  
AGPAT9  
AIM2  
ALDH1A1  
ANGPTL1  
APOBEC3G  
APOL1  
APOL2  
ARG2  
B2M  
BATF2  
BCL2L14  
BLVRA  
BLZF1  
C10orf10  
C15orf48  
C22orf28  
C4orf33  
C5orf27  
C5orf39  
CCDC109B  
CCDC92  
CCL19  
CCL2  
CCL5  
CCL8  
CD69  
CD80  
CEBPD  
CES1  
CFB  
CMAH  
CNP  
COMMD3  
CREB3L3  
CRP  
CSDA  
CXCL9  
CYP1B1  
DDIT4  
DDX58  
DDX60  
DEFB1  
DTX3L  
DYNLT1  
EIF2AK2

**Bartenschlager Replicon II Zhao replicon IEGs**

IRF1  
IRF9  
PSME2  
PSMB9  
RnaseL  
IFITM1  
IFITM3  
IFIT3  
TRIM14  
NOS2  
ACSS2  
AKR1C1  
ANKRD30A  
ASCC3L1  
ASTL  
ATP5C1  
BACE1  
C14orf177  
C1orf55  
CDC5L  
COPB2  
CORO1C  
CORT  
CTRB1  
CTSK  
DGCR2  
EFTUD2  
EIF3S10  
ERH  
GAB4  
GALP  
GBP5  
GDI2  
GPC4  
GPR18  
HCFC1  
HNRPC  
HNRPL  
IFNAR1  
IK  
IRF9  
JAK1  
KIAA1604  
LOC283587  
LOC284393  
LOC285658  
LOC342994  
LOC388460  
LOC388532  
LOC392742  
LOC401155  
LSM6  
LSM7  
LSM8  
LYPD2  
MEOX2

|          |               |
|----------|---------------|
| EPSTI1   | MFAP1         |
| ETV7     | MRPL10        |
| FAM125B  | MYOT          |
| FAM70A   | MYST1         |
| FBXO6    | NAP5          |
| FLJ11286 | NHP2L1        |
| FLJ39739 | PDCD5         |
| FUT4     | PKD1L3        |
| G6PC     | PPP2R2A       |
| GBP2     | PRPF6         |
| GCH1     | PRPF8         |
| GEM      | RBM22         |
| GK       | RNF187        |
| GTPBP2   | RP11-487F23.3 |
| GZMB     | RPL10         |
| HLA-G    | RPL11         |
| HPSE     | RPL14L        |
| HSH2D    | RPL17         |
| IFI35    | RPL21         |
| IFI44    | RPL32         |
| IFIH1    | RPL5          |
| IFIT1    | RPL7          |
| IFIT5    | RPL7P6        |
| IFITM2   | RUVBL1        |
| IFNGR1   | RUVBL2        |
| IGFBP2   | RWDD2         |
| IL17RB   | SART1         |
| IMPA2    | SF3A1         |
| IRF1     | SF3A3         |
| IRF2     | SF3B1         |
| IRF7     | SF3B14        |
| IRF9     | SF3B4         |
| ISG15    | SF3B5         |
| JUNB     | SMU1          |
| LAP3     | SNRP70        |
| LGALS3   | SNRPD1        |
| LGALS9   | SON           |
| LRG1     | STAT2         |
| LY6E     | STK40         |
| MAB21L2  | TAS2R50       |
| MAFB     | TSGA10IP      |
| MAP3K14  | TYK2          |
| MKX      | UBA52         |
| MOV10    | WBP11         |
| MS4A4A   | ZC3HAV1       |
| MT1F     | ZFP64         |
| MT1H     | ZMAT2         |



MYD88  
N4BP1  
NAPA  
NCF1  
NOD2  
NOS2A  
NRN1  
NT5C3  
NUP50  
OAS3  
OASL  
P2RY6  
PABPC4  
PARP12  
PBEF1  
PCK2  
PDGFRL  
PDK1  
PFKFB3  
PI4K2B  
PMM2  
PNRC1  
PRAME  
PUS1  
S100A8  
SAT3  
SECTM1  
SERPINE1  
SERPING1  
SIRPA  
SLC1A1  
SLC25A28  
SLFN5  
SOCS1  
SOCS2  
STEAP4  
THBD  
TLR3  
TMEM49  
TMEM51  
TNFAIP6  
TNFSF10  
TNFSF13B  
TRIM14  
TRIM38  
TYMP  
UBA7

UPP2  
USP18  
VAMP5  
VEGFC  
WARS  
XAF1

Cells are formatted to identify duplicate values across lists

**No.common genes**

6

3

7

**Fusco JFH1**

ACSL6  
ACTN2  
ADAM30  
AKAP8L  
ALG10  
ANKFY1  
APC2  
ASCL1  
ASPA  
BCHE  
C14ORF100  
CAPN6  
CCL26  
CCRL1  
CDX2  
CPA6  
CSF2  
DCT  
DHX9  
DMRT1  
DPP4  
DR1  
EDEM3  
EIF3S3  
EIF4E  
ENTPD3  
EPO  
ETV3  
FANCG  
FFAR2  
FLJ25168  
FLJ45235  
FN1  
FOXI1  
GCKR  
GCM1  
GJB4  
GUCY1B3  
GZMA  
HDGF2  
HEY2  
HRH4  
HSFY1  
HSP90AA1  
HSP90AB1  
IFNAR1

IFNAR2

IFNGR1

IQGAP2

IRF7

ISGF3G / IRF9

ITGB1

JAK1

KCNIP3

KIAA1049

KIAA1919

KIAA1944

LIPG

LOC113444

LOC51315

MAP2K4

MAP7

MCM7

MLL5

MYBL1

MYOT

MYST1

NBEA

NCAM2

NFATC2

NLRP14

OTC

OTOP1

OTUB1

PAFAH2

PAX5

PCDHB12

PCDHB14

PDIA2

PEO1

PGD

PLEKHA1

POLS

PPP3CB

PRDM5

PRIC285

RAB4B

RALA

RANBP2

RAPGEF1

RASGRF1

REM1

REV3L

RGPD5

RNF32

RNGTT

ROCK1

S100A8

SCG5

SFRS11

SFRS15

SLC27A2

SMAD3

SSX2IP

ST14

STAT2

SULT1E1

TAF5

TAS2R5

TEAD3

TFB2M

TGFBR1

THNSL1

TM7SF3

TTC5

TYK2

UCHL3

ZBTB6

ZNF224

ZNF469



| Gene    | Forward                  | Reverse                 |
|---------|--------------------------|-------------------------|
| ALG10   | AGACTCTCTGGATACTTGAGGCA  | TCTCTTCAGTGTTGGCAACTTC  |
| BCHE    | AGGCCAGCTTGTGCTATTGT     | TTTGTCTTTGGTTTACCTCTGGA |
| DPP4    | GCGACTGTCAGCTGTAGCAT     | GAAGGTTCTTCTGGGACTGC    |
| GAPDH   | ACCTTCCCCATGGTGTCTGA     | GCTCCTCCTGTTTCGACAGTCA  |
| GCKR    | CGAAGGTCCAACATGTGGTT     | CATGGCCACTGCTTTTCTTT    |
| GUCY1B3 | CCTTCTTCATCTAACTGTGCCTC  | TACGGATTTGTGAATCACGC    |
| IFNAR1  | ATGTCAAACACTACCCAGTGTGTC | CGCGGAGAAGGTAAATTCCTTT  |
| JFH1    | CTGTCTTCACGCAGAAAGCG     | TCGCAACCCAACGCTACTCG    |
| MX1     | GTTTCCGAAGTGGACATCGCA    | GAAGGGCAACTCCTGACAGT    |
| MYST1   | CCTCATGCTCCTTCTCCAAG     | GATCACTCGCAACCAAAAGC    |
| OAS     | AGAAGGCAGCTCACGAAAC      | CCACCACCCAAGTTTCCTG     |
| PPP3CB  | CCCCAACACATCGCTTGACAT    | CCCTGGGTATCCCATCCAAAT   |
| PDIP1   | GCCTGGAGTACAGCTTGAGG     | CCAAGCTCCGTGTGGTATTT    |
| SLC27A2 | TGTCTCCACACATCTCCTCG     | TATCGGTGAACTGCTTCGGT    |

Table S8.

**Table S9. Phenotype Knockdown Comparison**

|             | Phenotype-FR | Fold mRNA | Fold protein |
|-------------|--------------|-----------|--------------|
| ALG10 si1   | 6.00         | 0.01      | 0.63         |
| ALG10 si2   | 5.20         | 0.12      | 0.45         |
| ALG10 si3   | 4.59         | 0.03      | 0.30         |
| ALG10 si4   | 5.21         | 0.22      | 0.45         |
| BCHE si1    | 4.78         | 0.04      | 0.52         |
| BCHE si2    | 3.76         | 0.04      | 0.42         |
| BCHE si3    | 6.76         | 0.03      | 0.41         |
| BCHE si4    | 2.57         | 0.02      | 0.47         |
| DPP4 si1    | 2.23         | 0.11      | 0.27         |
| DPP4 si2    | 3.89         | 0.07      | 0.23         |
| DPP4 si3    | 4.03         | 0.08      | 0.26         |
| DPP4 si4    | 1.10         | 0.13      | 0.22         |
| GCKR si1    | 4.34         | 0.11 n/a  |              |
| GCKR si2    | 1.07         | 0.25 n/a  |              |
| GCKR si3    | 4.10         | 0.06 n/a  |              |
| GCKR si4    | 1.56         | 0.18 n/a  |              |
| GUCY1B3 si1 | 5.61         | 0.12      | 0.79         |
| GUCY1B3 si2 | 1.04         | 0.06      | 0.90         |
| GUCY1B3 si3 | 3.33         | 0.12      | 0.58         |
| GUCY1B3 si4 | 1.75         | 0.07      | 0.62         |
| MYST1 si1   | 2.67         | 0.02      | 0.61         |
| MYST1 si2   | 11.63        | 0.01      | 0.32         |
| MYST1 si3   | 8.90         | 0.01      | 0.32         |
| MYST1 si4   | 1.34         | 0.01      | 0.47         |
| PPP3CB si1  | 3.68         | 0.06      | 0.59         |
| PPP3CB si2  | 5.47         | 0.08      | 0.49         |
| PPP3CB si3  | 1.84         | 0.09      | 0.68         |
| PPP3CB si4  | 3.01         | 0.10      | 0.34         |
| PDIP1 si1   | 10.87        | 0.09      | 0.53         |
| PDIP1 si2   | 11.60        | 0.09      | 0.46         |
| PDIP1 si3   | 6.39         | 0.32      | 0.81         |
| PDIP1 si4   | 7.51         | 0.18      | 0.45         |
| SLC27A2 si1 | 6.10         | 0.09      | 0.55         |
| SLC27A2 si2 | 3.90         | 0.26      | 0.60         |
| SLC27A2 si3 | 4.50         | 0.20      | 0.30         |
| SLC27A2 si4 | 2.03         | 0.04      | 0.71         |





**Table S10. Lifecycle Rescue Scores**: the fold-rescue (p-value) for each siRNA that scored significant

|         | entry results |            |            |            | replication results |            |
|---------|---------------|------------|------------|------------|---------------------|------------|
|         | si1           | si2        | si3        | si4        | si1                 | si2        |
| ALG10   | 1.6 (.001)    |            |            | 2.2 (.018) | 1.6(.007)           | 1.9 (.000) |
| BCHE    |               | 1.7 (.002) |            |            |                     |            |
| DPP4    | 1.9 (.015)    | 1.7 (.002) | 1.8 (.025) | 1.6 (.001) |                     | 2.1 (.001) |
| GCKR    | 1.7 (.000)    |            |            |            |                     |            |
| GUCY1B3 | 2.1 (.028)    |            |            |            |                     |            |
| MYST1   | 2.2 (.031)    |            |            | 1.9 (.017) |                     |            |
| PPP3CB  | 2.7 (.002)    | 1.9 (.039) |            | 1.9 (.001) |                     |            |
| PDIP1   |               | 1.6 (.022) |            | 1.5 (.036) |                     | 1.3 (.042) |
| SLC27A2 | 2.0 (.004)    | 2.0 (.025) |            | 2.8 (.000) |                     |            |

**Ranking by Rescue Scores**

| entry results       |     |     |      |     |                             |      |                         |
|---------------------|-----|-----|------|-----|-----------------------------|------|-------------------------|
|                     | si1 | si2 | si3  | si4 | entry rescue score          |      |                         |
| DPP4                |     | 1.9 | 1.7  | 1.8 | 1.6                         | 7.0  | entry effector group    |
| SLC27A2             |     | 2   | 2.00 |     | 2.80                        | 6.8  |                         |
| PPP3CB              |     | 2.7 | 1.90 |     | 1.90                        | 6.5  |                         |
| MYST1               |     | 2.2 |      |     | 1.90                        | 4.1  |                         |
| ALG10               |     | 1.6 |      |     | 2.2                         | 3.8  |                         |
| PDIP1               |     |     | 1.60 |     | 1.50                        | 3.1  |                         |
| GUCY1B3             |     | 2.1 |      |     |                             | 2.1  |                         |
| BCHE                |     |     | 1.7  |     |                             | 1.7  |                         |
| GCKR                |     | 1.7 |      |     |                             | 1.7  |                         |
| replication results |     |     |      |     |                             |      |                         |
|                     | si1 | si2 | si3  | si4 |                             |      |                         |
| ALG10               |     | 1.6 | 1.9  | 2   |                             | 5.5  | replication effector    |
| DPP4                |     |     | 2.1  | 2.6 |                             | 4.7  |                         |
| PPP3CB              |     |     |      | 1.5 |                             | 1.5  |                         |
| PDIP1               |     |     | 1.3  |     |                             | 1.3  |                         |
| BCHE                |     |     |      |     |                             | 0.0  |                         |
| GCKR                |     |     |      |     |                             | 0.0  |                         |
| GUCY1B3             |     |     |      |     |                             | 0.0  |                         |
| MYST1               |     |     |      |     |                             | 0.0  |                         |
| SLC27A2             |     |     |      |     |                             | 0.0  |                         |
| RNA production      |     |     |      |     |                             |      |                         |
|                     | si1 | si2 | si3  | si4 | RNA production rescue score |      |                         |
| PDIP1               |     | 4.2 | 2.8  | 5.7 | 4.9                         | 17.6 | RNA production effector |
| MYST1               |     |     | 4    | 3.2 | 1.6                         | 8.8  |                         |
| ALG10               |     | 3.4 | 1.6  |     | 2.1                         | 7.1  |                         |
| SLC27A2             |     |     | 1.7  | 2.6 | 1.8                         | 6.1  |                         |
| PPP3CB              |     | 2.2 | 1.6  |     |                             | 3.8  |                         |
| GUCY1B3             |     | 1.9 |      |     |                             | 1.9  |                         |
| BCHE                |     |     |      |     |                             | 0.0  |                         |
| DPP4                |     |     |      |     |                             | 0.0  |                         |

GCKR

0.0

| core production results |      |      |     |             |              |
|-------------------------|------|------|-----|-------------|--------------|
| si1                     | si2  | si3  | si4 | Translation | rescue score |
| PDIP1                   | 10.9 | 11.6 | 6.4 | 7.5         | 36.4         |
| MYST1                   | 2.7  | 11.6 | 8.9 |             | 23.2         |
| ALG10                   | 6    | 5.2  | 4.6 | 5.2         | 21.0         |
| BCHE                    | 4.8  | 3.8  | 6.8 |             | 15.4         |
| SLC27A2                 | 6.1  | 3.9  | 4.5 |             | 14.5         |
| PPP3CB                  | 3.7  | 5.5  |     | 3           | 12.2         |
| DPP4                    | 2.2  | 3.9  | 4   |             | 10.1         |
| GUCY1B3                 | 5.6  |      | 3.3 |             | 8.9          |
| GCKR                    | 4.3  |      | 4.1 |             | 8.4          |
| egress                  |      |      |     |             |              |
| si1                     | si2  | si3  | si4 | Egress      | rescue score |
| ALG10                   | 3    | 3    |     | 4           | 10.0         |
| MYST1                   |      | 5.1  |     |             | 5.1          |
| PDIP1                   |      | 4.7  |     |             | 4.7          |
| BCHE                    | 2.7  |      |     |             | 2.7          |
| DPP4                    |      |      |     |             | 0.0          |
| GCKR                    |      |      |     |             | 0.0          |
| GUCY1B3                 |      |      |     |             | 0.0          |
| PPP3CB                  |      |      |     |             | 0.0          |
| SLC27A2                 |      |      |     |             | 0.0          |

translation effector group

egress effector group

significantly in a given lifecycle assay is included. All significantly scoring siRNAs are summed below to yield the

|            |            | <b>RNA production results</b> |            |            |            | <b>production</b> |
|------------|------------|-------------------------------|------------|------------|------------|-------------------|
| <b>si3</b> | <b>si4</b> | <b>si1</b>                    | <b>si2</b> | <b>si3</b> | <b>si4</b> | <b>si1</b>        |
| 2.0 (.002) |            | 3.4 (.003)                    | 1.6 (.014) |            | 2.1 (.016) | 6 (.003)          |
|            |            |                               |            |            |            | 4.8 (.001)        |
| 2.6 (.000) |            |                               |            |            |            | 2.2 (.000)        |
|            |            |                               |            |            |            | 4.3 (.012)        |
|            |            | 1.9 (.047)                    |            |            |            | 5.6 (.000)        |
|            |            |                               | 4.0 (.002) | 3.2 (.001) | 1.6 (.001) | 2.7 (.003)        |
| 1.5 (.005) |            | 2.2 (.04)                     | 1.6 (.008) |            |            | 3.7 (.013)        |
|            |            | 4.2 (.000)                    | 2.8 (.01)  | 5.7 (.001) | 4.9 (.001) | 10.9 (.000)       |
|            |            |                               | 1.7 (.045) | 2.6 (.011) | 1.8 (.044) | 6.1 (.008)        |



*rescue-score* for each lifecycle step.

| <b>results</b> |            |            |
|----------------|------------|------------|
| <b>si2</b>     | <b>si3</b> | <b>si4</b> |
| 5.2 (.002)     | 4.6 (.001) | 5.2 (.025) |
| 3.8 (.002)     | 6.8 (.005) |            |
| 3.9 (.008)     | 4.0 (.009) |            |
|                | 4.1 (.011) |            |
|                | 3.3 (.020) | 1.8 (.000) |
| 11.6 (.003)    | 8.9 (.001) |            |
| 5.5 (.015)     |            | 3.0 (.005) |
| 11.6 (.008)    | 6.4 (.002) | 7.5 (.004) |
| 3.9 (.021)     | 4.5 (.009) |            |

| <b>egress results</b> |            |            |            |
|-----------------------|------------|------------|------------|
| <b>si1</b>            | <b>si2</b> | <b>si3</b> | <b>si4</b> |
| 3 (.001)              | 3 (.032)   |            | 4 (.024)   |
| 2.7 (.014)            |            |            |            |
|                       | 5.1 (.019) |            |            |
| 4.7 (.029)            |            |            |            |

**Table S11. Non-HCV Viral Rescue Scores**

| influenza virus results |             |             |             |             |                      |
|-------------------------|-------------|-------------|-------------|-------------|----------------------|
|                         | si1         | si2         | si3         | si4         | influenza score sums |
| ALG10                   | 1.62 (.000) | 1.32 (.043) |             |             | 2.94                 |
| BCHE                    | 1.95 (.000) |             |             |             | 1.95                 |
| DPP4                    |             |             | 1.49 (.012) |             | 1.49                 |
| GCKR                    |             | 1.46 (.03)  |             |             | 1.46                 |
| GUCY1B3                 | 1.51 (.001) |             |             |             | 1.51                 |
| MYST1                   |             | 2.25 (.000) |             | 1.62 (.028) | 3.87                 |
| PPP3CB                  |             | 1.51 (.005) | 1.32 (.044) | 1.45 (.006) | 4.28                 |
| PDIP1                   |             |             | 1.44 (.045) |             | 1.44                 |
| SLC27A2                 |             |             | 2.17 (.000) |             | 2.17                 |

**Ranking by Rescue Scores**

| influenza virus results |             |             |             |             |                        |
|-------------------------|-------------|-------------|-------------|-------------|------------------------|
|                         | si1         | si2         | si3         | si4         | influenza rescue score |
| PPP3CB                  |             | 1.51 (.005) | 1.32 (.044) | 1.45 (.006) | 4.28                   |
| MYST1                   |             | 2.25 (.000) |             | 1.62 (.028) | 3.87                   |
| ALG10                   | 1.62 (.000) | 1.32 (.043) |             |             | 2.94                   |
| SLC27A2                 |             |             | 2.17 (.000) |             | 2.17                   |
| BCHE                    | 1.95 (.000) |             |             |             | 1.95                   |
| GUCY1B3                 | 1.51 (.001) |             |             |             | 1.51                   |
| DPP4                    |             |             | 1.49 (.012) |             | 1.49                   |
| GCKR                    |             | 1.46 (.03)  |             |             | 1.46                   |
| PDIP1                   |             |             | 1.44 (.045) |             | 1.44                   |

| dengue virus results |               |               |               |              |                     |
|----------------------|---------------|---------------|---------------|--------------|---------------------|
|                      | si1           | si2           | si3           | si4          | dengue rescue score |
| PPP3CB               |               | 10.33 (0.011) | 11.47 (0.013) | 6.89 (0.026) | 28.69               |
| PDIP1                | 14.71 (0.009) | 11.11 (0.011) | 2.78 (0.001)  |              | 28.59               |
| ALG10                | 6.13 (.011)   | 4.04 (0.025)  | 10.89 (0.017) | 5.07 (0.028) | 26.13               |
| MYST1                |               | 14.37 (0.006) |               | 3.01 (0.000) | 17.38               |
| DPP4                 | 1.99 (0.038)  | 10.86 (0.009) | 4.5 (0.007)   |              | 17.36               |
| SLC27A2              | 4.46 (0.038)  | 3.91 (0.009)  | 2.82 (0.000)  | 3.58 (0.020) | 14.77               |
| BCHE                 | 6.03 (0.004)  | 2.63 (0.017)  | 2.08 (0.046)  | 3.44 (0.029) | 14.18               |
| GCKR                 |               | 4.10 (0.007)  | 3.41 (0.018)  | 2.26 (0.003) | 9.77                |
| GUCY1B3              |               | 3.38 (0.017)  |               | 4.43 (0.021) | 7.81                |

| HCV results for comparison |     |      |      |     |                  |      |
|----------------------------|-----|------|------|-----|------------------|------|
|                            | si1 | si2  | si3  | si4 | HCV rescue score |      |
| PDIP1                      |     | 10.9 | 11.6 | 6.4 | 7.5              | 36.4 |
| MYST1                      |     | 2.7  | 11.6 | 8.9 |                  | 23.2 |
| ALG10                      |     | 6    | 5.2  | 4.6 | 5.2              | 21.0 |
| BCHE                       |     | 4.8  | 3.8  | 6.8 |                  | 15.4 |
| SLC27A2                    |     | 6.1  | 3.9  | 4.5 |                  | 14.5 |
| PPP3CB                     |     | 3.7  | 5.5  |     | 3                | 12.2 |

|                |     |     |     |      |
|----------------|-----|-----|-----|------|
| <b>DPP4</b>    | 2.2 | 3.9 | 4   | 10.1 |
| <b>GUCY1B3</b> | 5.6 |     | 3.3 | 8.9  |
| <b>GCKR</b>    | 4.3 |     | 4.1 | 8.4  |



:fold-rescue (p-value) for each siRNA that scored significantly in a given viral assay is included.

### dengue virus results

| si1           | si2           | si3           | si4          | dengue score sums |
|---------------|---------------|---------------|--------------|-------------------|
| 6.13 (.011)   | 4.04 (0.025)  | 10.89 (0.017) | 5.07 (0.028) | 26.13             |
| 6.03 (0.004)  | 2.63 (0.017)  | 2.08 (0.046)  | 3.44 (0.029) | 14.18             |
| 1.99 (0.038)  | 10.86 (0.009) | 4.5 (0.007)   |              | 17.36             |
|               | 4.10 (0.007)  | 3.41 (0.018)  | 2.26 (0.003) | 9.77              |
|               | 3.38 (0.017)  |               | 4.43 (0.021) | 7.81              |
|               | 14.37 (0.006) |               | 3.01 (0.000) | 17.38             |
|               | 10.33 (0.016) | 11.47 (0.013) | 6.89 (0.026) | 28.69             |
| 14.71 (0.009) | 11.11 (0.019) | 2.78 (0.001)  |              | 28.59             |
| 4.46 (0.038)  | 3.91 (0.009)  | 2.82 (0.000)  | 3.58 (0.020) | 14.77             |

### Influenza Virus IEG

Dengue Virus IEGs

HCV IEGs

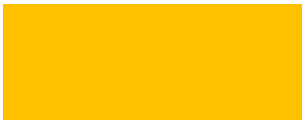

All significantly scoring siRNAs are summed to yield rescue-score for each viral assay.

**Figure S1. The HCV-IEG Screen Platform Detects the Release of Infectious HCV**

To determine if our 48h screening assay encompassed late stage HCV lifecycle steps, we quantified both the infectious virions released and the percentage of cells that were scored as infected at 3 sequential time points. These studies revealed that during the timeframe of our assay there is a significant increase in the amount of infectious virions released. In addition, there was a marked elevation in the number of cells infected between 24 and 48h. These findings indicate that our assay encompasses the HCV viral lifecycle through infectious virion egress and an additional round of infection.

**(A)** A 96 well source plate was prepared by plating 10,000 Huh7.5.1 cells per well, then 24hr later infecting the cells with JFH1 (MOI = 1). At the indicated time points, viral supernatant was collected from the source plate well, and serially diluted (10x dilutions) then administered to a destination plate containing uninfected cells. The destination plate was then incubated for 48h post-inoculation, then fixed and stained to determine the percent infection. The X axis indicates fold dilution of supernatant collected at indicated times. The Y axis represents the percent infection determined by staining each replicate plate with anti -HCV core antibody and DNA stain. \* indicates  $p \leq .05$  compared to 6H values.

**(B)** TCID<sub>50</sub>s of the viral supernatant collected at 6, 24, and 48h post-infection in **(A)**.

**(C)** Images of destination plates from (A, B). The time post-inoculation is indicated. Green and blue indicate HCV core and DNA staining, respectively. Percent infection of the destination plate is indicated.

**(D)** The kinetics of viral spread from cell to cell was assessed. Huh7.5.1 cells were plated in 96 well plates followed 12h later by inoculation with JFH1 in serial 2-fold

dilutions. Cells were incubated for 9, 24, or 48h then fixed and stained for HCV core protein expression and cellular DNA, followed by imaging to assess the percentage of cells infected with HCV. X axis indicates fold dilution of inoculum, Y axis indicates percent infection at the indicated time post-inoculation. Values indicate mean +/-SEM, n=3. \* indicates  $p \leq 0.05$  when compared to 9H values. Arrows indicate percent infection for the viral dilution yielding an MOI of 1, the MOI used in the screen, and point to values of 4.9 and 47 percent infection at 24H and 48H, respectively. n=9.

**(E)** Images of plates from **(D)**, neat viral inoculation at time indicated. Green and blue indicate HCV core and DNA staining, respectively. Percent infection of the destination plate is indicated.

**Figure S2. Image Scoring Optimization Enhanced Sensitivity and Specificity for Rescue of Viral Infection from IFN- $\alpha$ .** Custom analysis improves both sensitivity and accuracy of scoring for HCV infected cells. Algorithm: The algorithm used first segments the DAPI channel to pick up all the individual nuclei. A rough thresholding is performed for the entire DAPI image. The nuclear segmentation is then refined by adjusting the threshold on a per-object basis and dividing clustered nuclei. To score all cells in the GFP channel, the GFP image is smoothed and image background is calculated using smoothed image. Thresholding is performed for the GFP image using scaled image background. To score positive cells, the algorithm matches nuclear segmentation with GFP segmentation to find GFP positive nuclei. In order to remove the large circular debris in the GFP channel, the size and shape of all the objects identified are measured, and the objects with area and roundness above a given threshold are removed. Images represent cells infected with JFH1 HCV, stained with HCV core Ab, and imaged for 1000 ms in FITC channel.

**(A)** Raw image, where HCV-infected cells appear white in FITC channel.

**(B)** The raw image from **(A)** was scored using low threshold Metamorph parameters that captured all infected cells, but also scored reflected bubbles (black arrows). Scored pixels are indicated in green.

**(C)** Raw image **(A)** was scored using high threshold Metamorph parameters that did not capture artifact (black arrow). This method failed to detect multiple HCV positive cells (blue arrows).

**(D)** Custom analysis. enabled scoring of additional HCV positive cells (blue arrows), without capturing artifact (black arrow).

**Figure S3. Select HCV-IEGs are Required for IFN- $\alpha$ 's Suppression of an Established HCV Infection**

**(A).** Huh7.5.1 cells were transfected with the indicated siRNAs for 72h, then infected with JFH1 for 48h, all in the absence of IFN- $\alpha$  .

**(B)** Huh7.5.1 cells were transfected with the indicated siRNAs, then infected with JFH1 (MOI of 1) and incubated for 24h. Cells were then treated with IFN- $\alpha$  (100 IU/ml) for 48h. Cells were stained for HCV core and DNA then imaged and analyzed for percent infection. Y axis values represent the fold rescue of HCV infection (percent infection, measured via HCV core staining) above the levels detected in cells transfected with non-targeting siRNA. X axis values represent individual siRNA duplex. siRNA targets are indicated in titles.

## Figure S4. PDIP1 or BCHE overexpression does not inhibit HCV replication

We exogenously expressed PDIP1 to test its sufficiency as an IEG. PDIP1 exists in both long and short isoforms, both of which were targeted by all 4 siRNA sequences recovered in this screen<sup>27</sup>. Plasmids containing each isoform were transiently transfected into Huh7.5.1 cells for 24h, followed by JFH1 infection. Forty eight hours post-infection, we quantified the levels of intracellular JFH1 using qRT-PCR (Fig. S4a,b). These studies showed that neither the short nor long isoforms of PDIP1 were sufficient to decrease viral RNA production. Therefore, either the basal levels of PDIP1 are saturating, or PDIP1 acts in concert with, and/or elicits the actions of, additional IEGs to halt HCV. Expression of a second IEG, BCHE, in full length and truncated forms, yielded similar results (Fig. S4c,d).

**(A)** Huh7.5.1 cells were transiently transfected with the indicated vectors expressing PDIP1 $\beta$  (long isoform), or PDIP1 $\alpha$  (short isoform). 24h following transfection, medium was replaced with fresh medium containing JFH1 (MOI = 1). Forty eight hours after infection RNA was isolated for qRT-PCR evaluation of PDIP1 levels and normalized to GAPDH.

**(B)** Huh7.5.1 cells were transiently transfected with the indicated vectors expressing BCHE (full length), or a truncated form of BCHE, then processed and evaluated for BCHE levels as in (A).

**(C)** qRT-PCR was performed to quantify the levels of JFH1, normalized to GAPDH, from (A).



**(D)** qRT-PCR was performed to quantify the levels of JFH1, normalized to GAPDH, from **(B)**.

Y axes indicate mRNA fold change (arbitrary units), X axes indicate the transfected plasmid. Bars indicate the mean value  $\pm$  SEM, n=3 for all experiments.

## Figure S5. IFN- $\alpha$ Inhibits HCV Entry

Prior to assessing the effects of IEG knockdown on HCV pseudoparticle (pp) entry, the inhibitory effect of IFN- $\alpha$  on HCVpp, compared to VSVpp, was evaluated. While fully infectious VSV is known to be IFN- $\alpha$  sensitive, to our knowledge only one study has assessed the IFN- $\alpha$  sensitivity of VSVpp entry<sup>31</sup>. This study, performed in human alveolar cells, detected inhibition of VSVpp entry when assessed 1.5h post-infection. In contrast, our assessment of VSVpp entry at 48h post infection in human hepatoma cells did not detect IFN- $\alpha$  mediated suppression of VSV entry. In our system, dose titration of IFN- $\alpha$  led to a modest decrease in HCVpp entry; this inhibition was specific for entry and not for subsequent steps required for ZSG reporter gene expression (transcription and translation), because treatment of cells subsequent to infection with HCVpps did not inhibit reporter expression. Entry pseudoparticles were constructed using JFH1 (HCV-E1 E2) or VSV (VSV-G) envelope, HIV gag-pol (PACS2), and a GFP reporter construct (pAGM).

**(A)** HCVpp but not VSVpp are IFN- $\alpha$  sensitive. Cells were seeded then treated with IFN- $\alpha$  at the indicated concentration (X axis) for 24h, followed by removal of IFN- $\alpha$  and infection with pseudoparticles for 48h. Cells were then fixed, stained with Hoechst DNA stain, imaged for GFP and DNA, and scored for percent reporter-positive cells.

**(B)** IFN- $\alpha$  sensitivity is not due to impaired reporter transcription / translation. Post-entry treatment with IFN- $\alpha$  does not suppress HCV pseudoparticle signal production. Huh7.5.1 cells were seeded then infected with HCV pseudoparticles and incubated for one week to allow maximal protein expression to take place. Cells were then treated

with IFN- $\alpha$ . X axis represents IFN- $\alpha$  dose, Y axis indicates percent reporter-positive cells.

**(C)** Corresponding images for **(A)**. Images represent GFPpp reporter (green) in top row, and corresponding DNA stain (blue) in bottom row. From left to right, cells were infected with HCV-E1 E2 pp's, no IFN- $\alpha$ ; HCV-E1 E2 pp's, 100 IU/ml IFN- $\alpha$ ; VSVpp's, no IFN- $\alpha$ ; VSVpp's, 100 IU/ml IFN- $\alpha$ .

**Figure S6. Schematic of IFN Effector Groups Active at Each Step of the HCV Viral Lifecycle**

HCV lifecycle steps are outlined. The infectious HCV virion interacts with the cellular CD81, claudin, occludin, SRBP1 and LDL receptors, followed by clathrin mediated endocytosis and fusion within an acidic endosomal compartment. The positive sense single stranded RNA HCV genome is then released, and localized to the endoplasmic reticulum. Through interaction with host ribosomes, HCV +ssRNA is then translated into a single polyprotein (initial translation), followed by auto and cell-mediated cleavage to form 3 structural proteins (core, E1 and E2) and 7 non-structural proteins (the p7 ion channel, NS2, NS3, NS4A, NS4B, NS5A, and NS5B). The non-structural proteins form an HCV RNA replication complex, including the RNA polymerase NS5B, and transcribe – sense ssRNA from the +ssRNA HCV genome. This –ssRNA template is then used by the same replication complex for +ssRNA replication (initial replication). Freshly transcribed +ssRNA transcripts are then translated into additional HCV polyprotein (amplified translation) which is cleaved and used for 1) assembly of mature virions and 2) additional +ssRNA transcription (amplified replication). Mature virions are transported to the cell membrane and released. These fully infectious virions can then infect surrounding cells, representing secondary infection. Using assays for entry (pseudoparticles), replication (replicon), HCV core protein production (core IF), HCV RNA production (qRT-PCR) and egress (supernatant transfer), specific lifecycle steps rescued by each IEG knockdown were characterized. The IEG knockdowns that rescued each lifecycle step from IFN- $\alpha$  are indicated in boxes.

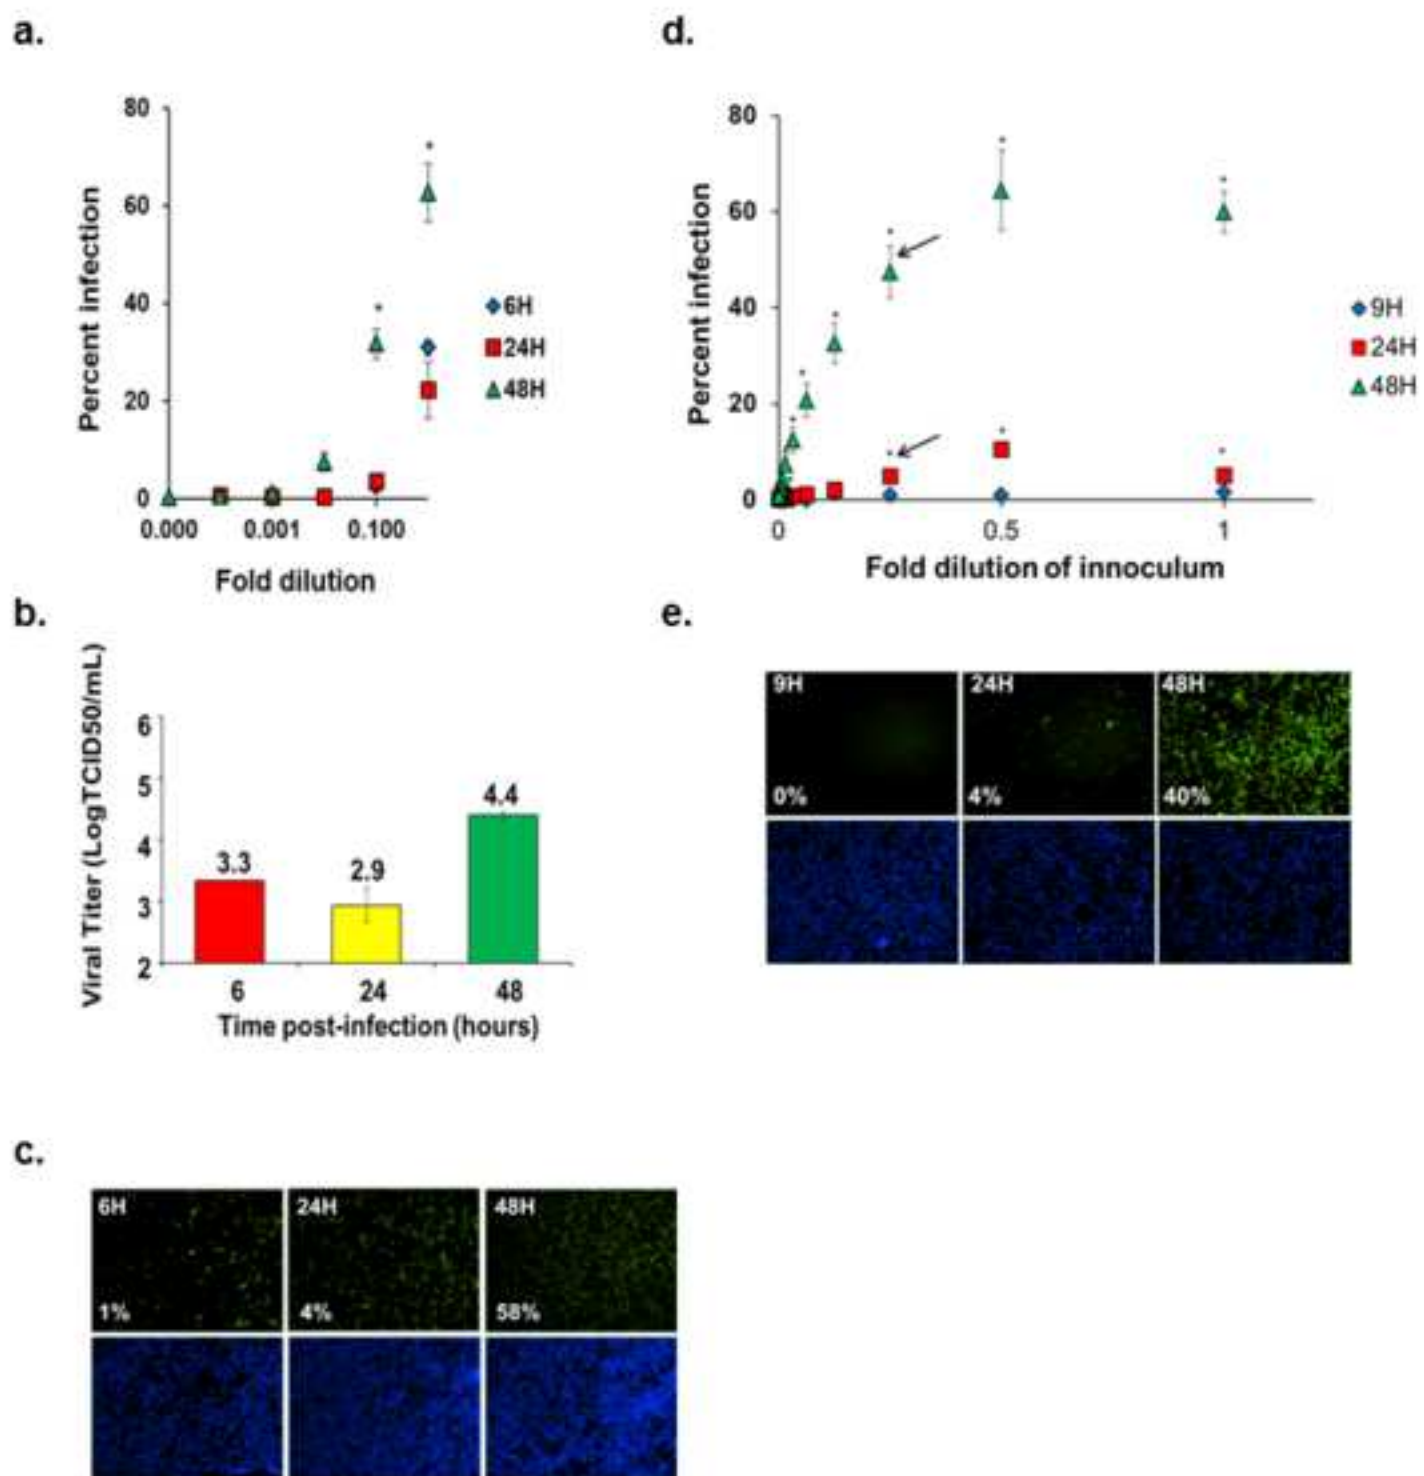

Fig.S1

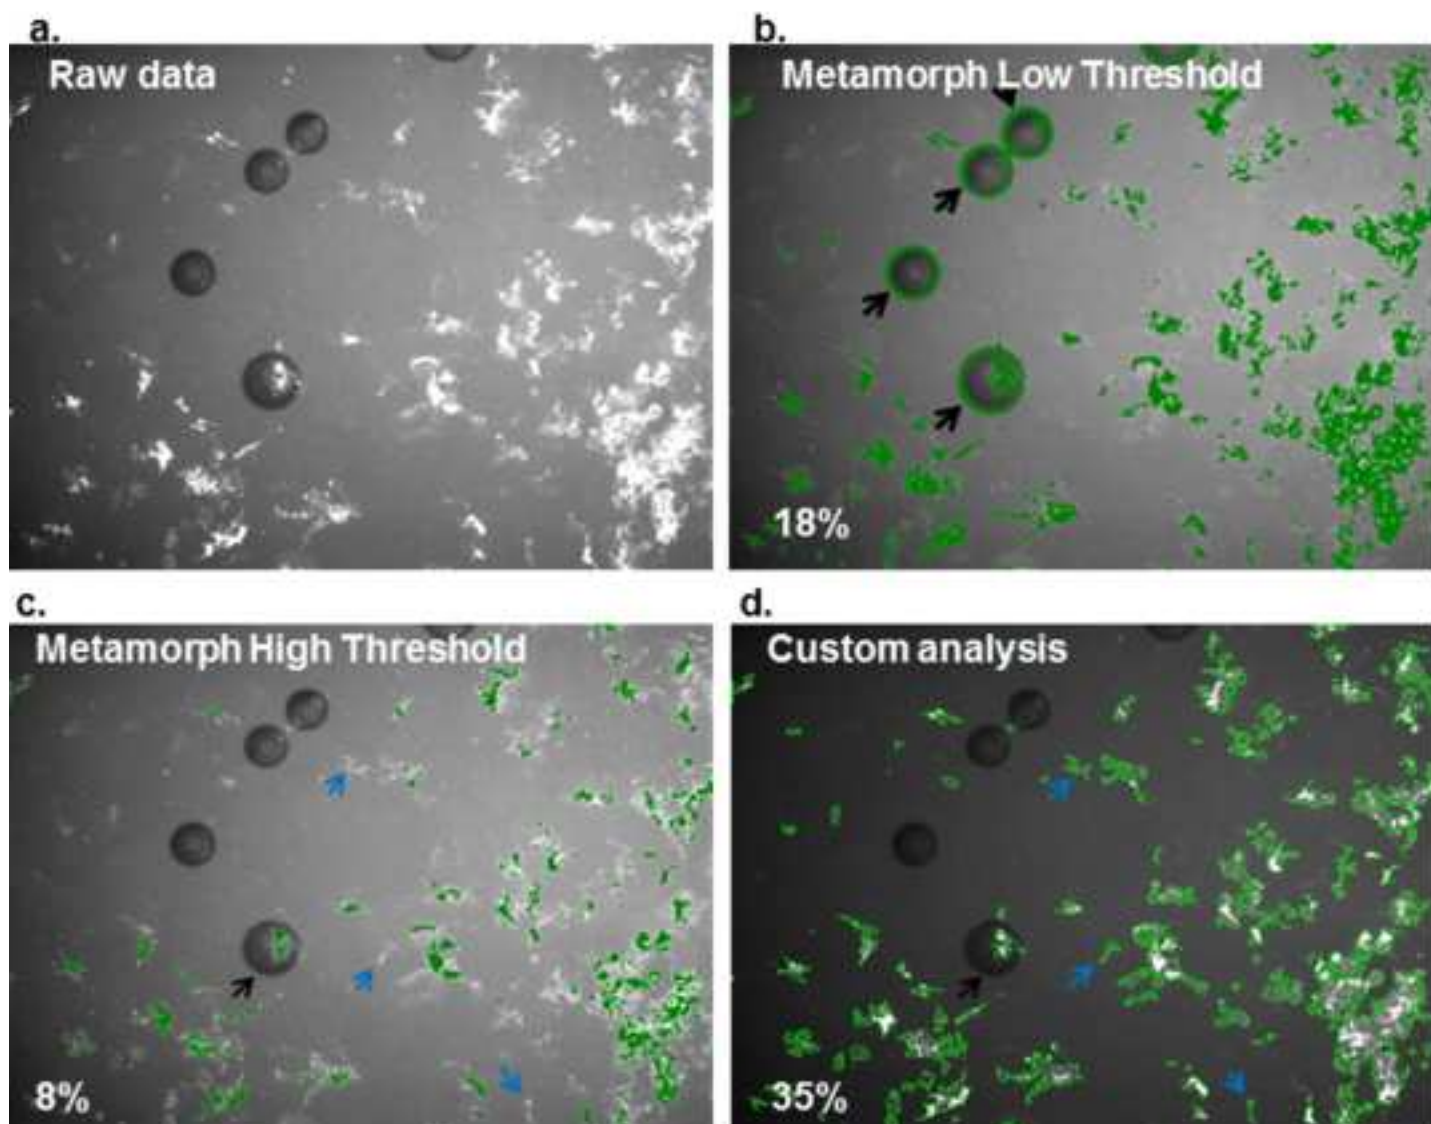

Fig. S2

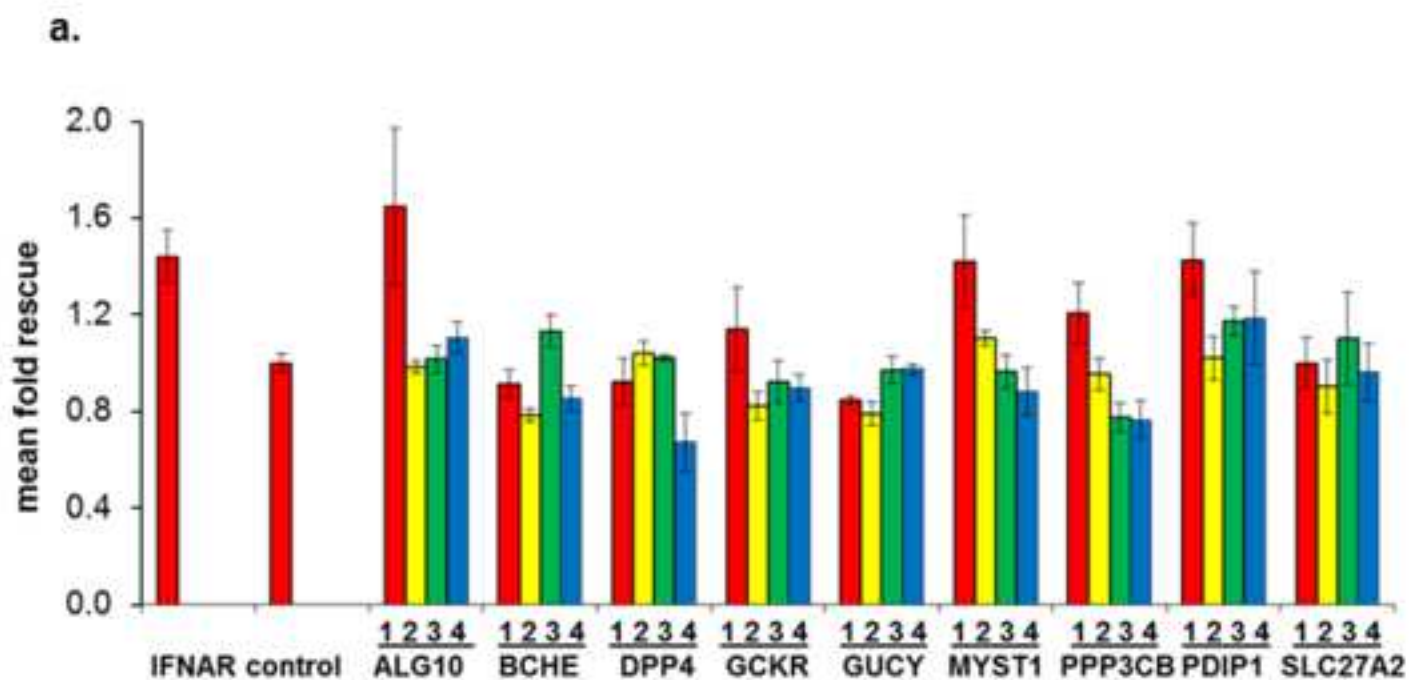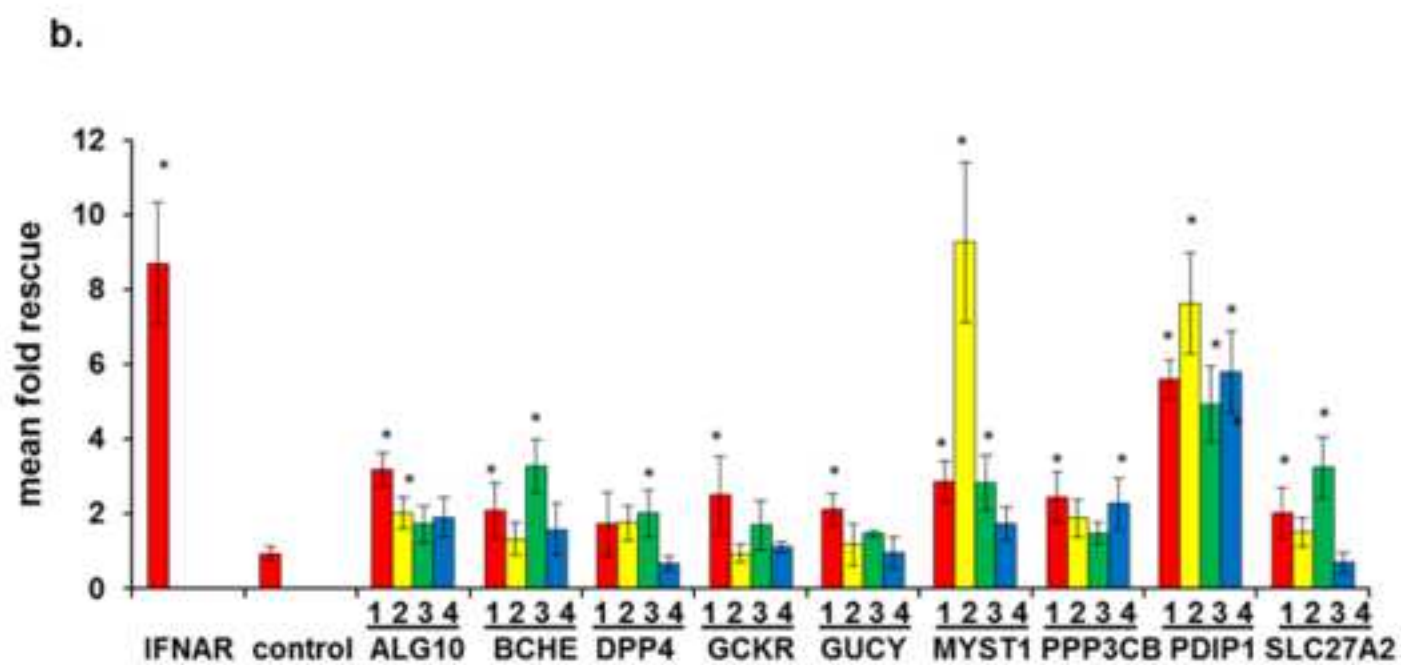

Fig. S3

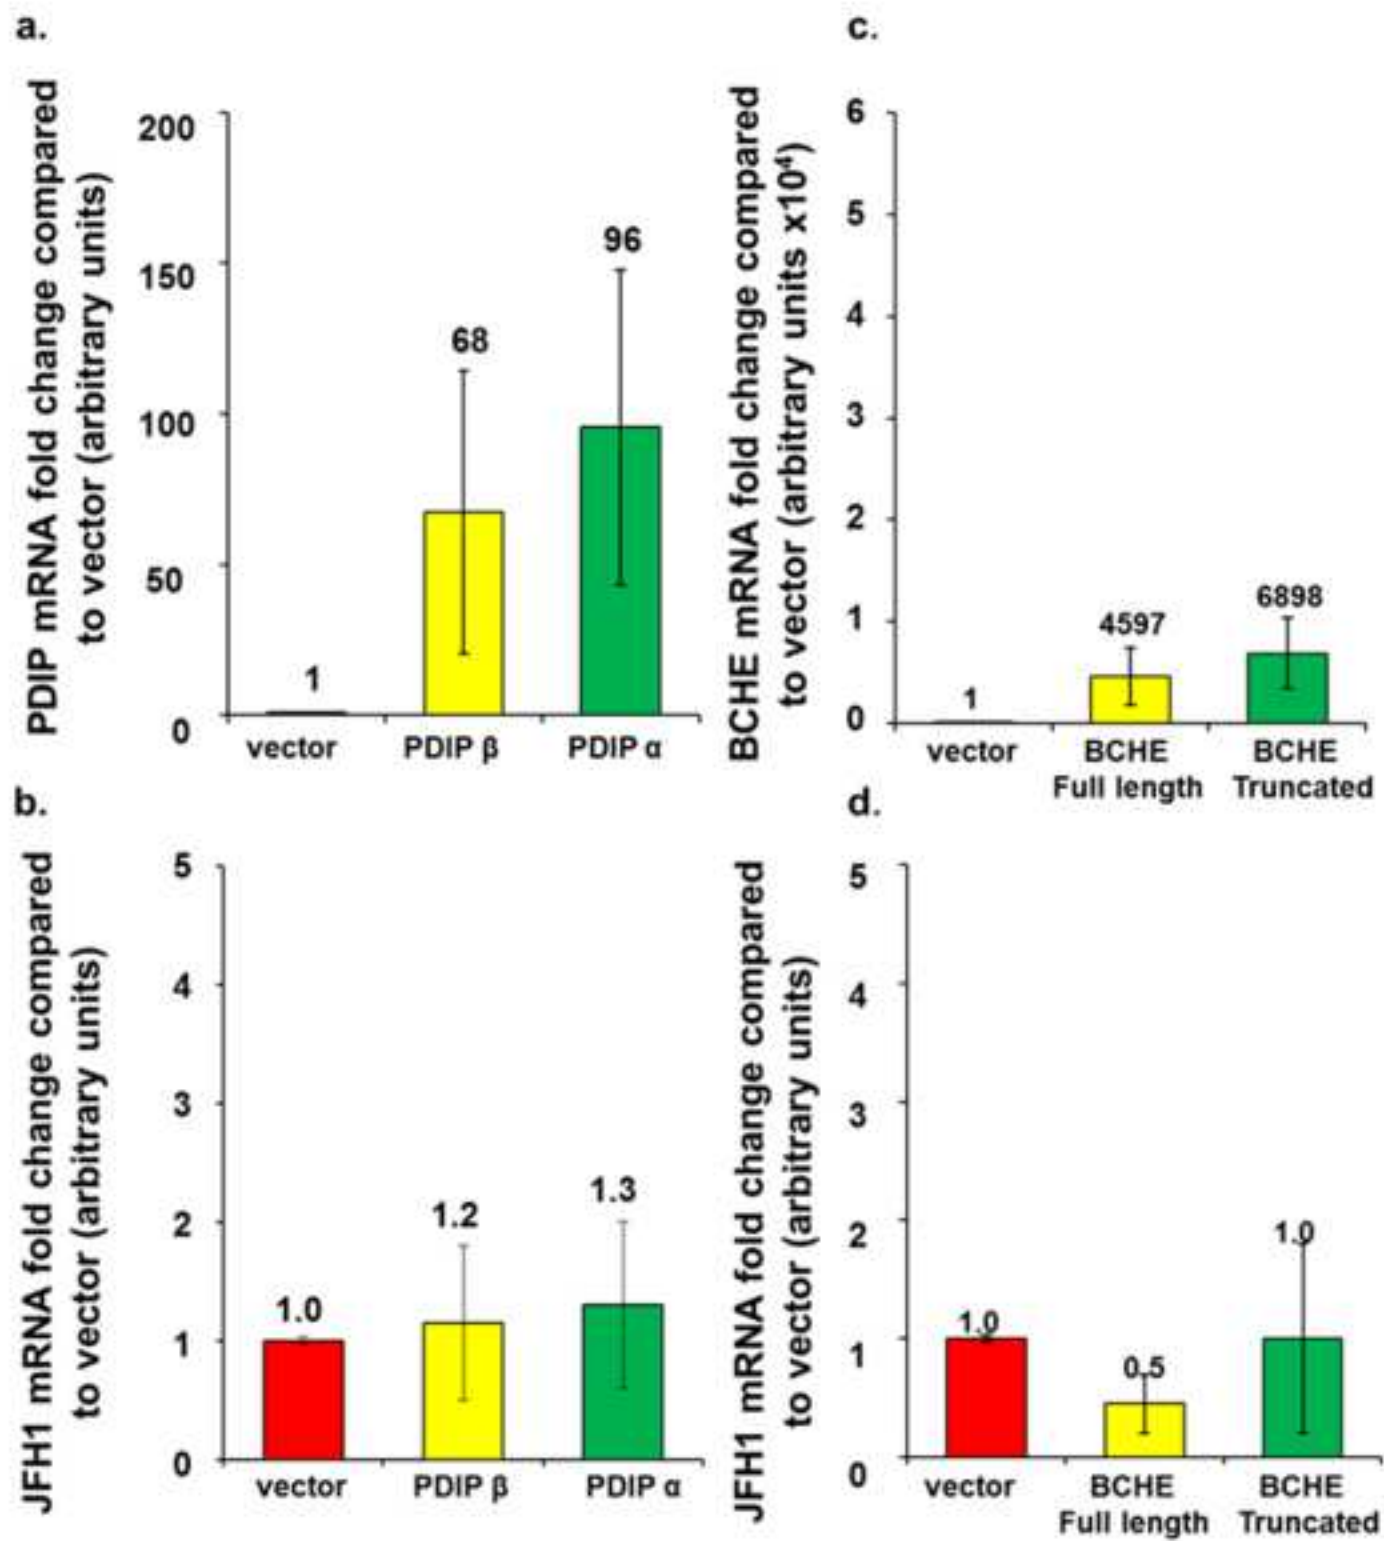

Fig.S4



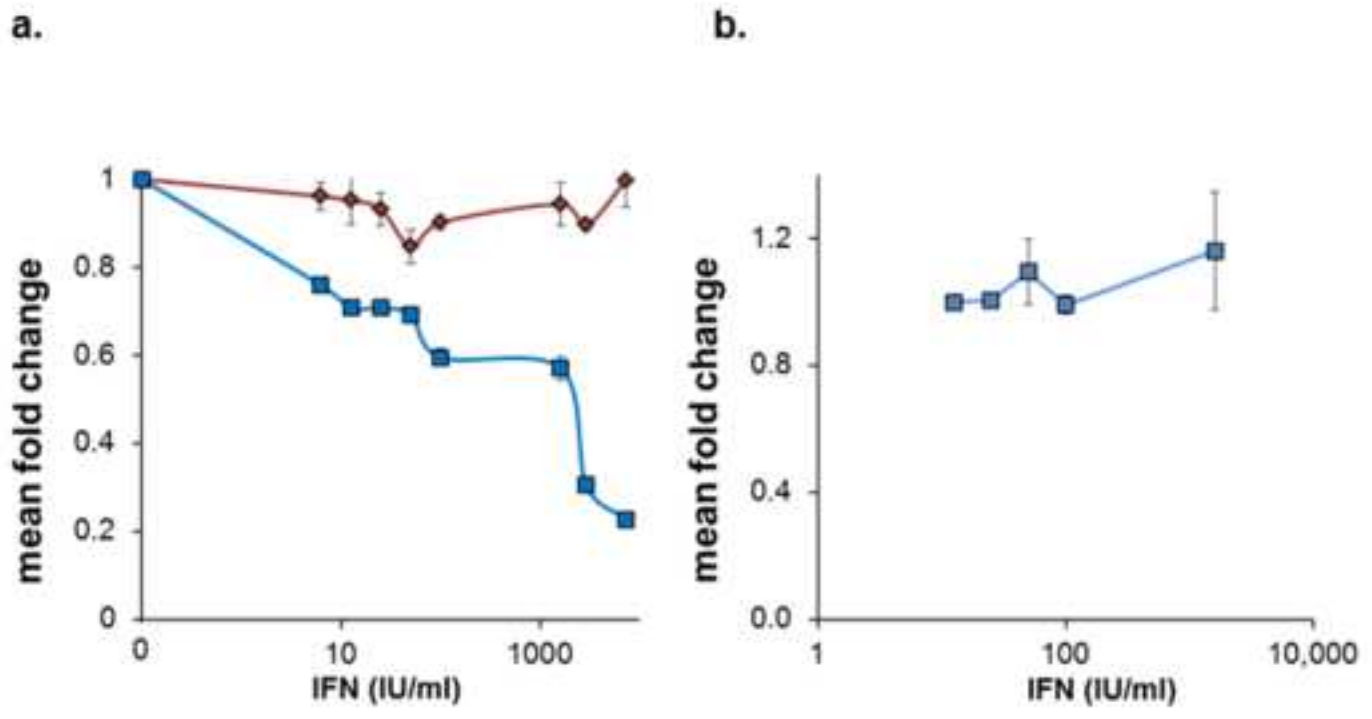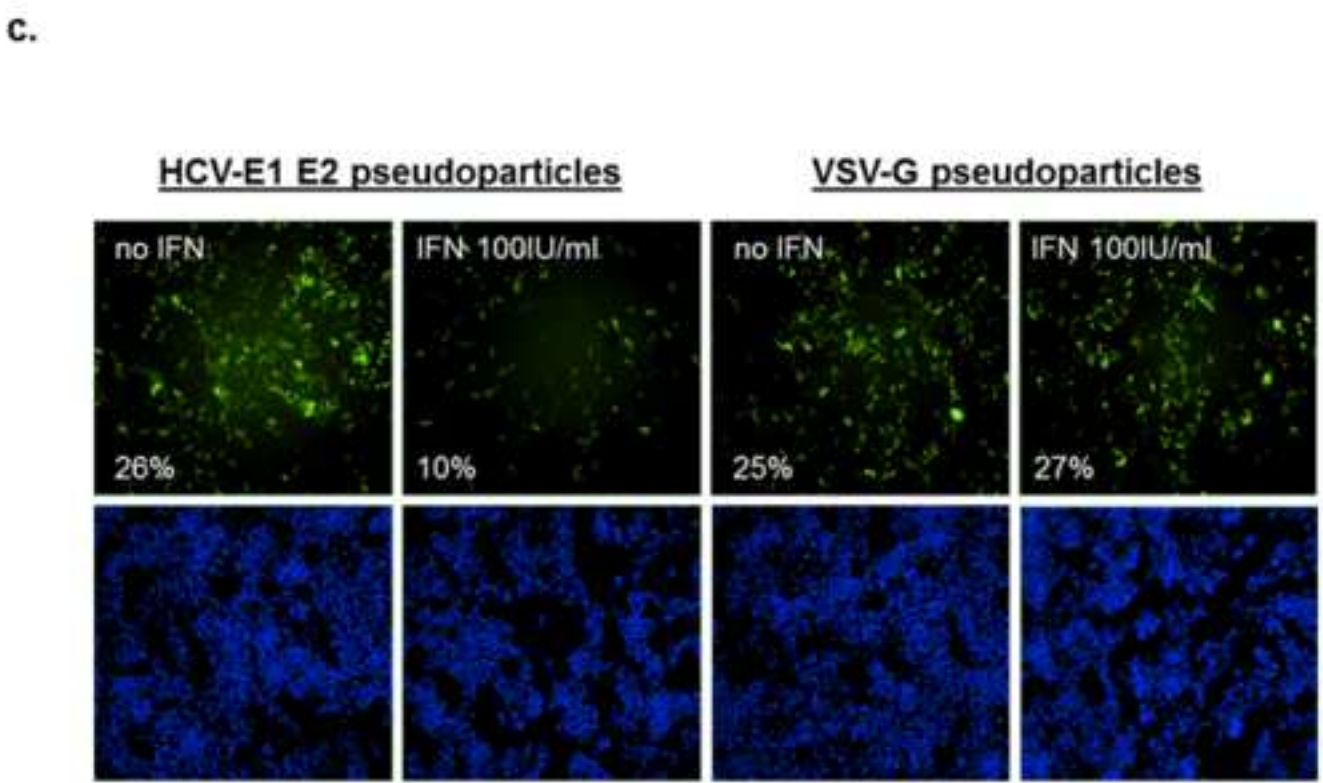

Fig.S5

### IFN- $\alpha$ Effector Genes

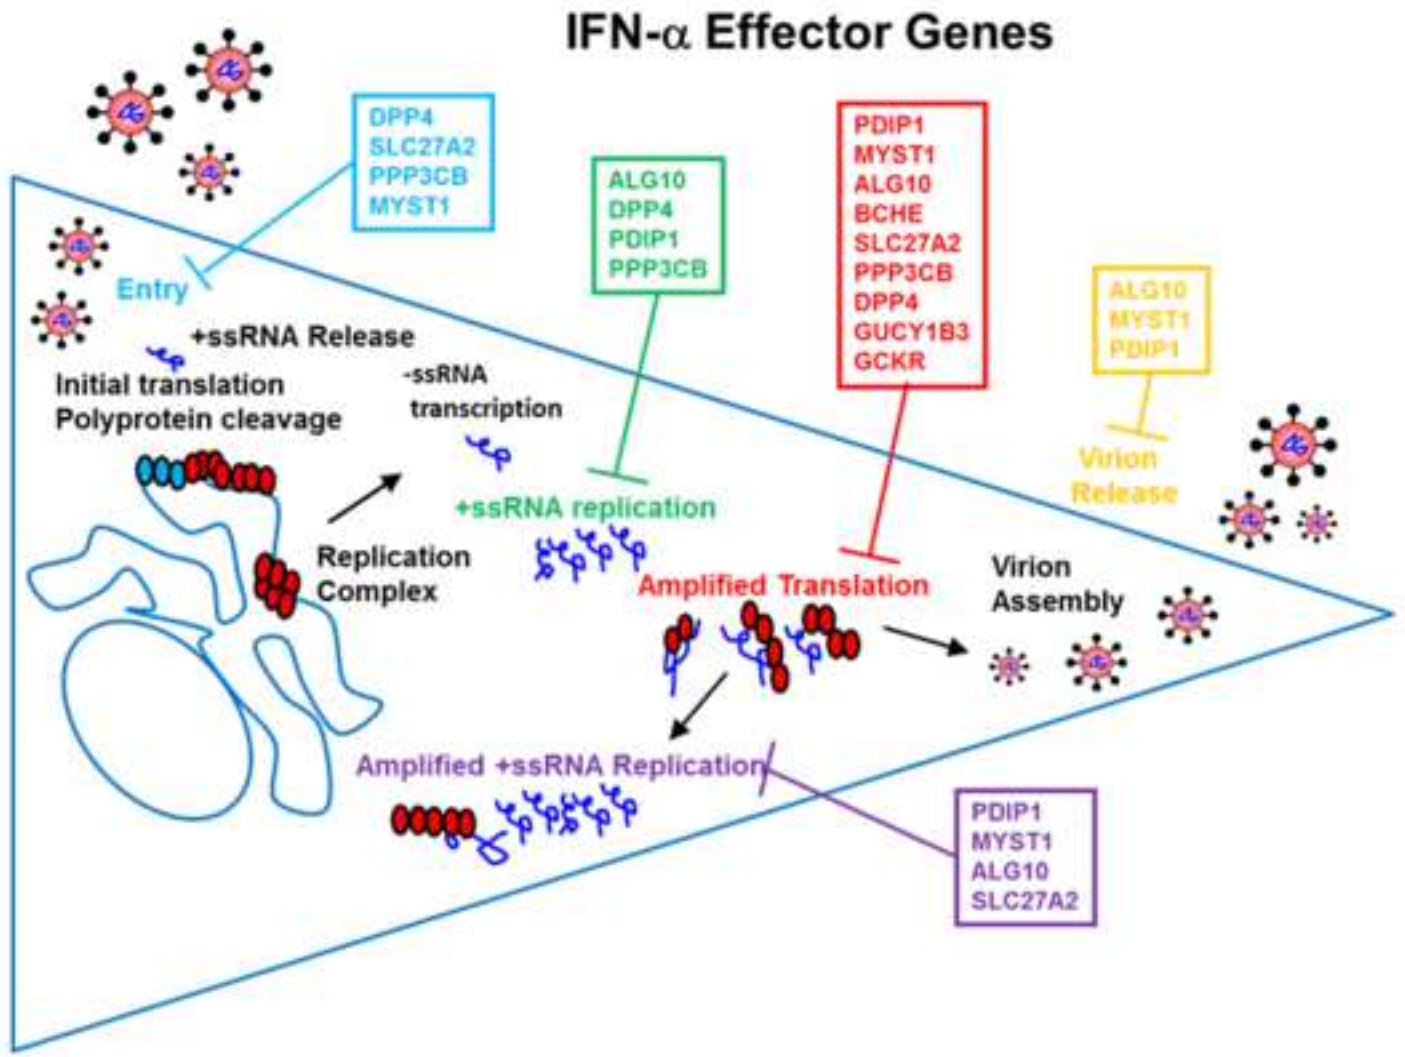

Fig.S6
